# Supplementary material for: Nursing workload, patient safety incidents and mortality: an observational study from Finland
Source: PubMed Central journal article supplement — BMJ Open. 2018 Apr 24;8(4):e016367. doi: 10.1136/bmjopen-2017-016367 (PMC5922465; doi:10.1136/bmjopen-2017-016367), 2018-04-24
Supplement: bmjopen-2017-016367.draft_revisions.pdf [file bmjopen-2017-016367.draft_revisions.pdf]

# BMJ Open

BMJ Open is committed to open peer review. As part of this commitment we make the peer review history of every article we publish publicly available.

When an article is published we post the peer reviewers' comments and the authors' responses online. We also post the versions of the paper that were used during peer review. These are the versions that the peer review comments apply to.

The versions of the paper that follow are the versions that were submitted during the peer review process. They are not the versions of record or the final published versions. They should not be cited or distributed as the published version of this manuscript.

BMJ Open is an open access journal and the full, final, typeset and author-corrected version of record of the manuscript is available on our site with no access controls, subscription charges or pay-per-view fees (<http://bmjopen.bmj.com>).

If you have any questions on BMJ Open's open peer review process please email [info.bmjopen@bmj.com](mailto:info.bmjopen@bmj.com)

# BMJ Open

## OPTIMAL LEVEL OF NURSING WORKLOAD POSITIVELY AFFECTS PATIENT SAFETY INCIDENTS AND MORTALITY – AN OBSERVATIONAL STUDY

|                                 |                                                                                                                                                                                                       |
|---------------------------------|-------------------------------------------------------------------------------------------------------------------------------------------------------------------------------------------------------|
| Journal:                        | <i>BMJ Open</i>                                                                                                                                                                                       |
| Manuscript ID                   | bmjopen-2017-016367                                                                                                                                                                                   |
| Article Type:                   | Research                                                                                                                                                                                              |
| Date Submitted by the Author:   | 12-Mar-2017                                                                                                                                                                                           |
| Complete List of Authors:       | Fagerström, Lisbeth; Åbo Akademi University, Faculty of Education and Welfare; University College of Southeast Norway, Kinnunen, Marina; Vaasan keskussairaala Saarela, Jan; Åbo Akademi University   |
| <b>Primary Subject Heading</b>: | Nursing                                                                                                                                                                                               |
| Secondary Subject Heading:      | Health services research                                                                                                                                                                              |
| Keywords:                       | Health & safety < HEALTH SERVICES ADMINISTRATION & MANAGEMENT, Human resource management < HEALTH SERVICES ADMINISTRATION & MANAGEMENT, Risk management < HEALTH SERVICES ADMINISTRATION & MANAGEMENT |
|                                 |                                                                                                                                                                                                       |

SCHOLARONE™  
Manuscripts

Only

1  
2  
3  
4  
5 **OPTIMAL LEVEL OF NURSING WORKLOAD POSITIVELY AFFECTS PATIENT SAFETY INCIDENTS AND MORTALITY –**  
6 **AN OBSERVATIONAL STUDY**  
7

8  
9  
10 **Authors:**

11 1. Professor Lisbeth Fagerström, PhD,  
12 Åbo Akademi University, Faculty of Education and Welfare Studies, Vaasa, Finland;  
13  
14 University College of Southeast Norway, Faculty of Health and Social Sciences, Drammen, Norway.  
15  
16

17  
18 2. Chief Director of Nursing Marina Kinnunen, PhD,  
19  
20 Vaasa Central Hospital, Vaasa, Finland  
21

22  
23 3. Professor Jan Saarela, PhD,  
24  
25 Åbo Akademi University, Faculty of Education and Welfare Studies, Vaasa, Finland  
26  
27

28  
29 **Corresponding Author:**

30  
31 Professor Lisbeth Fagerström, Faculty of Education and Welfare Studies, Åbo Akademi University,  
32  
33 Strandgatan 2, 65101 Vaasa, Finland. Mobile: +358414331097; +4745503873, Phone number: +358 2 21531  
34

35  
36 Email: [lisbeth.fagerstrom@abo.fi](mailto:lisbeth.fagerstrom@abo.fi); [lisbeth.fagerstrom@usn.no](mailto:lisbeth.fagerstrom@usn.no)  
37  
38  
39  
40  
41  
42  
43  
44  
45  
46  
47

1  
2  
3  
4  
5 Key words: nurse staffing, outcomes, patient safety, mortality, human resources  
6  
7

8 Word count: 2764 words.  
9  
10  
11  
12  
13  
14  
15  
16  
17  
18  
19  
20  
21  
22  
23  
24  
25  
26  
27  
28  
29  
30  
31  
32  
33  
34  
35  
36  
37  
38  
39  
40  
41  
42  
43  
44  
45  
46  
47

For peer review only

## Abstract

**Objective** To investigate whether a staffing model based on optimal nursing workload (NWL), measured using the RAFAELA system, can positively affect patient safety incidents (PSI) and mortality and to compare staffing models based on the RAFAELA system with those based on patient-to-nurse ratios.

**Setting** We obtained data from 36 units of four Finnish hospitals. One was a tertiary acute care hospital, and the three others were secondary acute care hospitals

**Participants** Data were obtained on daily level during one year from 36 units (totally 12,475 data points/observations). The following data were collected daily: patients' nursing intensity (249,123 classifications), nursing resources, PSI and mortality. Using multivariate logistic regression analyses, associations were estimated daily between nursing intensity per nurse in relation to the optimal level, PSI and mortality. Nursing staffing models were estimated, without any control variables, by standardizing for both unit-specific effects and effects of weekdays, holidays and seasons.

**Primary and secondary outcome measures:** Main outcome measures were PSI, and mortality data.

**Results** The odds for one PSI were 0.76 (95% confidence interval [CI]: 0.65-0.90) when the daily workload per nurse was below the recommended optimal workload level and 1.27 (95% CI: 1.11-1.45) when it was above the optimal level. The odds for death were 0.77 (95% CI: 0.60-1.00) and 1.41 (95% CI: 1.16-1.70) when the workload per nurse was below and above the recommended optimal workload level, respectively. These results were quite uniform in both unstandardized and standardized models.

**Conclusions** We have demonstrated an association between daily NWL and PSI and mortality. Optimal resource allocation is needed for successful leadership, clinical governance, preventing PSI and reducing the mortality risk. Physicians' patient-related direct time could be included in further studies.

### Strengths and limitations of this study

- To our knowledge, the actual study is the first study on the relationship between optimal NWL and daily outcomes that are based on analyses on daily levels
- The study provides new evidence that the traditional nurse staffing method, the patient-to-nurse ratio, fails to control for patients' severity and case mix
- Further analyses of other patient characteristics (e.g., age, gender or diagnoses) were not conducted because the OPCq instrument takes these variables into account.
- We did not address the effects of skill-mix, competence level, work experience or other health care professionals' patient-related direct time on patient outcomes.

### Introduction

Many studies have shown that insufficient nurse staffing in hospital-based care negatively affects outcomes such as mortality, infections, and failure to rescue (1-6). However, the results are inconsistent and indicate a complex and non-linear relationship between nursing workload (NWL), mortality, and other patient outcomes (7-12). The strength of the evidence underpinning the association between nurse staffing and outcomes in previous studies can be challenged: poor research design, measurement problems and/or imprecise data that does not take into account daily variations in patients' care needs can contribute to the mixed findings seen (8).

Higher nurse staffing and richer skill mix are associated with improved patient outcomes (4,8,10). Therefore, higher ratios have been recommended for improving patient safety and outcomes (1,9). However, it is difficult to set fixed, standard patient-to-nurse ratios for units in acute care hospitals, as evidenced in systematic reviews and other studies (7,10,13-15). Instead staffing levels must match patients' nursing care needs (8,16,17), and therefore nursing intensity (acuity/dependency level) per patient, as a measure of the amount and complexity of nursing care needed, is required for the assessment of an optimal and appropriate NWL (18,19).

1  
2  
3  
4  
5 We only found two studies on the relationship between optimal NWL and outcomes. Needleman et al (8) found a significant association between  
6 increased mortality and increased exposure to unit shifts when nurse staffing was below target level. In a recent study based on monthly means  
7 (17), when average daily NWL was above the optimal level the incidence rate of death was 13-fold more than when average daily NWL was  
8 below the optimal level. To our knowledge, no studies exist on the relationship between optimal NWL and daily outcomes that are based on  
9 analyses on daily levels. The aim of this observational study was to investigate whether a staffing model based on optimal NWL, measured daily  
10 using the RAFAELA Nursing Intensity and Staffing system, can positively affect patient safety incidents (incidents) and mortality. Also, we  
11 want to compare staffing models based on the RAFAELA system with those based on patient-to-nurse ratios.  
12  
13  
14  
15

## 16 17 **METHODS**

### 18 19 **Study setting**

20  
21  
22  
23 We obtained data from 36 units of four Finnish hospitals. One (A, 9 units) is a tertiary acute care hospital, whereas the three others (B, 14 units;  
24 C, 4 units; D, 9 units) are secondary acute care hospitals. Inclusion criteria were daily use of the RAFAELA system according to standards,  
25 reliable nursing intensity data expressed in terms of a yearly reliability test done by parallel classifications (requirement: unanimity >70%), and  
26 applicable optimal nursing intensity level measured with the PAONCIL method (16,19-21). Units that had undergone major organizational  
27 changes over the previous year were excluded. The A and B data represent the period January 1 - December 31, 2012, and the C and D represent  
28 the period January 1 - December 31, 2013.  
29  
30  
31  
32  
33

34 In that the study received approval from the chief administrative physicians of all four hospitals involved, no further ethical approval was  
35 necessary. We did not include any sensitive health-related data of patients in the study, or any information regarding characteristics of the nurses.  
36 The RAFAELA is owned by the Association of Finnish Local and Regional Association Authorities and governed by non-commercial Finnish  
37 Consulting Group Ltd.  
38  
39  
40  
41  
42  
43  
44  
45  
46  
47

## Measurement of NWL and its optimality in the RAFAELA Nursing Intensity and Staffing system

The RAFAELA is a standardized, person-centered, evidence-based system for nurse staffing that was developed in the 1990s (16, 19). The feasibility, validity, and reliability of the RAFAELA have been tested with good results (16, 17, 21, 22). It is now used in about 90% of the hospitals in Finland, and has lately been implemented in Iceland, the Netherlands, Sweden, and Norway (22). The main function of the system is to determine the optimal NWL when the patients' care needs are in balance with the nursing resources, i.e., an optimal level. To accomplish this, there are daily measures of patients' nursing intensity by the Oulu Patient Classification (OPCq), and of the daily nursing resources i.e., for all levels of nurses who participate in caring for the patients, excluding hours for administrative work, sick leaves, meetings, and trainings. A requirement for users of the RAFAELA system is that the interrater reliability for nursing intensity measurements should be tested yearly.

The OPCq instrument consists of six sub-areas of nursing care; nursing intensity level varies from 6 to 24 points for an individual patient per calendar day (16, 19). The nurses' WL is calculated by dividing the total amount of nursing intensity points on the unit (e.g. 350), with the number of nurses (e.g. 12) taking care of patients during the same 24 hours. The patient-related NWL will then be for example 29.2 OPCq points/nurse (OPC-to-nurse). The Professional Assessment of Optimal Nursing Care Intensity Level (PAONCIL), is an instrument used to assess the optimal workload and various contextual and organizational factors for each unit (21). The basic idea of the RAFAELA is that this actual NWL is to be compared with the established optimal level for the unit (e.g. 22-30 points/nurse). When the actual NWL is at the optimal level, the resources are considered to be allocated appropriately. The recommendation is that the optimal NWL has to be reassessed by conducting the PAONCIL study every second year; the optimal levels used in this study were not older than 2-3 years.

Our data consist of daily measures of every patient's nursing intensity during one year (365/366 days per unit) with the RAFAELA system (19). The patient-related nurse resources were also recorded in a standardized model each day where the non-patient related time was excluded.



1  
2  
3  
4  
5 All data were collected during a period of one year, hence there were 12,475 data points/observations. These were based on totally 249,123  
6 classifications of patients' nursing intensity, i.e. OPCq classifications. Table 1 shows the central variables of the data material regarding each  
7 unit's optimal workload (PAONCIL level), daily mean number of classified patients, daily mean number of OPCq classifications, total OPCq  
8 points, nursing staff resources, number of patients per nurse, OPCq points per nurse, incidents, and deaths.  
9

10  
11  
12 *Insert Table 1 here.*  
13

## 14 **Outcomes**

15  
16  
17  
18 Data on incidents were collected daily from HaiPro, a standardized patient safety system (23, 24). As defined by HaiPro, an incident is a safety  
19 hazard that may harm or harm the patient. There are two types of incidents: near miss, which could have caused harm to the patient but was  
20 prevented by chance or by timely preventive actions, and adverse events, which are negative events that caused harm to the patient. Incidents are  
21 classified in 14 categories (24). Mortality data were retrieved from the local mortality register data.  
22  
23

## 24 **Statistical analyses**

25  
26  
27  
28 Using multivariate logistic regression analyses, associations were estimated on the daily level between nursing intensity per nurse in relation to  
29 the optimal level and incidents (four different types of incidents as measured by the HaiPro patient safety reporting system) and mortality. Using  
30 multivariate logistic regression analyses, we estimated associations on the daily level during one year between the daily nursing intensity per  
31 nurse in relation to the optimal level, on the one hand, and four different types of incidents (as measured by the HaiPro patient safety reporting  
32 system) and deaths, on the other hand . Parallel analyses were performed for the patient-related patient-to-nurse ratio (3, 5, and 7 equal groups),  
33 which is an alternative measure of NWL.  
34  
35  
36  
37  
38  
39  
40  
41  
42  
43  
44  
45  
46  
47

1  
2  
3  
4  
5 Evaluations based on the PAONCIL method was assessed in three different ways using (1) the standard version of the optimal level, i.e., with a  $\pm$   
6 15% deviation from the optimal nursing intensity point (16, 19, 21); (2) with a halved deviation, i.e.,  $\pm$  7.5% from the optimal point; and (3) with  
7 a doubled deviation, i.e.,  $\pm$  30% from the optimal point. The patient-to-nurse method was assessed using three alternative categorizations of the  
8 patient-to-nurse ratio, or with three, five, and seven equal groups, respectively. Consequently, there were 30 different models to be estimated.  
9  
10 Each model was analyzed with three sets of variables: (1) without any control variables, (2) when standardizing for unit-fixed effects, and (3)  
11 when standardizing for both unit-fixed effects and effects of weekdays, holidays, and seasons. Model fit improvement was generally higher with  
12 RAFAELA than with the standard patient per nurse. Analyses were performed using SPSS 21. All estimates are expressed in terms of odds ratios  
13 with 95% confidence intervals.  
14  
15  
16  
17  
18  
19

## 20 RESULTS

21  
22  
23 In Table 2 the unstandardized odds ratios for the associations between the various NWL models and incidents and mortality rates are  
24 summarized. When nurses' daily workload according to RAFAELA was below the optimal level, the odds ratio of incidents (one incident,  
25 patient not affected, adverse event, and more than one incident, respectively) was 0.66 to 0.68 of that of the optimal workload level, i.e., about  
26 30-35% lower. The odds ratio of death was even lower (0.55; 95% CI: 0.43-0.70). When NWL exceeded the optimal level, the likelihood of  
27 incidents significantly increased (odds ratio of 1.13 versus 1.28). The odds ratio of mortality between above-optimum nursing intensity and  
28 within optimum nursing intensity was 1.42 (95% CI: 1.19-1.69). When the optimal interval was halved, the associations between incidents were  
29 slightly weakened, but still significant. When the optimal interval was doubled, the associations were generally, although not uniformly,  
30 strengthened.  
31  
32  
33  
34  
35  
36

37 Estimated associations between NWL and the occurrence of patient safety incidents and deaths were mostly weaker and less systematic in  
38 models based on the patient-to-nurse ratio (panels 4-6 in Table 2 than in the optimal nursing intensity models (panels 1-3 in Table 2). Incidents,  
39  
40  
41  
42  
43  
44

1  
2  
3  
4  
5 and particularly deaths, were less likely when the patient-to-nurse ratio was small. In analyses according to patients per nurse, divided in three  
6 equal groups, the odds ratio was 0.74 (95% CI: 0.64-0.86), and the odds ratio of death was 0.47 (95% CI: 0.38-0.58). This difference was even  
7 more marked when comparing days with the lowest NWL to the middle category in the more detailed classifications (5 or 7 groups), but the  
8 estimates of the other categories were not significant and did not show a systematic pattern for the association between the patient-to-nurse ratio  
9 and the likelihood of an incident.  
10  
11  
12  
13

14 *Insert Table 2 here.*  
15

16  
17 When unit-fixed effects were added, associations between the NWL in relation to optimal ratio and the occurrence of incidents remained almost  
18 the same (Table 3). The estimates were slightly weaker compared to the unstandardized ones; in some cases, they were not significant, but the  
19 pattern was almost identical. Estimates for associations between the patient-to-nurse ratio and the occurrence of incidents displayed a more  
20 consistent pattern compared to those in the unstandardized results, because the likelihood of incidents is highly unit-dependent, an aspect that is  
21 not captured by the patient-to-nurse ratio only. The odds of an incident increased with the NWL in terms of both the OPC-to-nurse and patient-  
22 to-nurse ratios. Yet in terms of statistical significance, and hence the reliability of the measure as a predictor of an event, the former is at most  
23 instances, clearly preferable.  
24  
25  
26  
27  
28

29 *Insert Table 3 here.*  
30

31  
32 The results remained very stable when the effects of weekdays, holidays, and seasons were added (Table 4). Briefly, the odds ratio of an incident  
33 or death was about 20% lower if the OPC-to-nurse ratio was below the optimal interval, and approximately 10-30% higher for incident and 40%  
34 for death, if it was above that interval. The same conclusions apply for the three-group categorization of the patient-to-nurse ratio, but the  
35 estimates come with notably lower statistical significance.  
36  
37  
38  
39  
40  
41  
42  
43  
44  
45  
46  
47

1  
2  
3  
4  
5 *Insert Table 4 here.*  
6

7  
8 The odds for one incident were about 30% lower on a Saturday than on any other weekday. On holidays, the odds for one incident were 0.63  
9 (95% CI: 0.42-0.93) that of the odds for one incident on a day other than a holiday and events were most likely to occur in September and  
10 October. Deaths were least likely in November and December.  
11

12  
13 Figure 1 summarizes the findings regarding the risk level for *unstandardized and standardized estimates* of deaths daily in relation to the optimal  
14 NWL.  
15

16  
17  
18 *Insert Figure 1 here.*  
19

## 20 21 **DISCUSSION**

22  
23 Our findings show that the odds for one incident were 20-30% lower and 20-30% higher when the NWL was below and above the recommended  
24 optimal NWL, respectively. Corresponding estimates for the odds of death were 20% lower and 40% higher, respectively. These results were  
25 quite uniform in both the unstandardized and standardized models. No clear-cut associations were noted with weekdays or holidays such as  
26 Easter, Midsummer, Christmas or New Year.  
27  
28

29  
30  
31 Donaldson et al. (9) did not find significant changes in patient safety associated with decreased NWL and could not confirm compliance with  
32 ratios per shift. Other studies used hospital-level administrative data that imprecisely allocated staffing to patients' care needs (8, 11). We  
33 conclude that such associations between nurse staffing, patient outcomes and mortality can be challenged (12, 17). Our study provides results  
34 based on daily measures of all-in-hospital patients' actual nursing intensity, including detailed registration of used staff resources and the effect  
35  
36  
37  
38  
39  
40  
41

1  
2  
3  
4  
5 on incidents and mortality on daily levels. Needleman et al. (8) found similar results between mortality and day-to-day, shift-to-shift variation in  
6 staffing and Junttila et al. (17) between mortality and days with NWL over optimal level on a monthly level.  
7

8  
9 As in any observational study, we could not control for all confounding factors. In our study, the associations and significance levels changed  
10 only marginally when unit-specific effects and effects of holidays, weekdays and seasons were included. We found also additional evidence that  
11 the staffing model with optimal level, determined using the RAFAELA system, considered the different characteristics of the units, such as  
12 organizational factors (e.g., unit size, leadership, physical environment).  
13

14  
15  
16  
17 Analysis of the HaiPro database meets WHO criteria for a good reporting system (23, 24). Reporting incidents are affected by several factors  
18 (e.g., staff's lack of motivation, knowledge, nursing staff shortage, stressful situations, burn out; 23). An assumption is that when NWL is very  
19 high only some incidents are reported, resulting in incidents connected to high NWL being underreported.  
20

21  
22  
23 Our results showed that if the interval for the optimal level was halved or doubled, the associations remained quite stable. The OPC-to-nurse  
24 calculation is more detailed than the traditional patient-to-nurse ratio. While comparable to the HHPD model (the average number of productive  
25 nursing hours per patient; 25), its accuracy of nursing resources is higher. For example, if a nurse becomes sick during a shift and leaves the unit,  
26 the nurse in charge will deduct these hours from the unit's resources.  
27  
28

29  
30 We find evidence that a staffing model based on daily measurement of individual patient care needs and optimal NWL can predict incidents and  
31 mortality rates better than a patient-to-nurse model, but this should be further tested and replicated in larger, longitudinal multicenter studies.  
32 Units that underwent major organizational changes over the previous year were excluded from our study because this may negatively influence  
33 the data quality, and we preferred to have a smaller data set that was reliable. The accuracy of the data (NWL, incidents, mortality) is considered  
34 to be reliable and even higher than in earlier studies on NWL and adverse outcomes.  
35  
36  
37  
38  
39  
40  
41  
42  
43  
44  
45  
46  
47

1  
2  
3  
4  
5 Our study has certain limitations. Hospital settings are characterized by complexity regarding factors affecting total NWL (1, 2, 13, 26, 27).  
6 While a list of central organizational and contextual factors were included in the PAONCIL instrument, we did not address the effects of skill-  
7 mix, competence level and/or work experience on patient outcomes. Physicians' patient-related direct time and health care support should be  
8 included in further studies (28). Further analyses of other patient characteristics (e.g., age, gender or diagnoses) were not conducted because the  
9 OPCq instrument takes these variables into account, however these aspects require additional considerations in further studies. The actual study  
10 was the first study about the relationship between optimal NWL and daily outcomes that are based on analyses on daily levels. A multi-center  
11 study with several hospitals are needed to further test the generalizability of the study results.  
12  
13  
14  
15  
16

17 A strength of the actual study is that the analyses were conducted based on nurses' independent classifications of patients' nursing intensity. Our  
18 study is based on a scientifically tested NWL system, which enables comparisons (16) and provides new evidence that the traditional nurse  
19 staffing method, the patient-to-nurse ratio, fails to control for patients' severity and case mix (7,9,10). A staffing model based on optimal NWL is  
20 an attempt to find a new innovative model, which fills a gap in existing knowledge for leadership and clinical governance (29).  
21  
22  
23  
24

## 25 **Conclusions**

26  
27 The patient-case mix and patient severity groups require different staff resources to maximize positive patient outcomes (4, 8, 17, 30). NWL  
28 should be monitored daily using reliable instruments to ensure good patient outcomes. Optimal resource allocation is needed for successful  
29 leadership and clinical governance and is crucial for favorable outcomes, preventing adverse events and reducing the mortality risk.  
30  
31  
32  
33  
34

35  
36 Words 2 712  
37  
38  
39  
40  
41  
42  
43  
44

1  
2  
3  
4  
5 **Contributors** LF did the literature search. LF, MK and JS designed the study. LF collected the data. LF and JS analyzed data and all of  
6 the authors contributed to data interpretation, writing, and revision of the report.  
7

8  
9 **Funding** The authors disclosed receipt of the following financial support for the research and authorship for this article: The State  
10 Research Funding of Vaasa Hospital District based on the Health Care Act (1326/2010).  
11  
12

13 **Competing interest** The authors declared no potential conflicts of interest with respect to the research, authorship, and/or publication of this  
14 article.  
15

16  
17 **Data Sharing** No additional data are available.  
18  
19

## 20 **References**

- 21 1 Aiken LH, Clarke SP, Sloane DM, et al. Hospital nurse staffing and patient mortality, nurse burnout, and job dissatisfaction. *JAMA*  
22 2002;288:1987-93.  
23
- 24 2 Aiken LH, Cimiotti JO, Sloane DM. Effects of nurse staffing and nurse education on patient deaths in hospitals with different nurse work  
25 environments. *Med Care* 2011;49:1047-53.  
26
- 27 3 Aiken LH, Sloane DM, Bruyneel L, et al. Nurse staffing and education and hospital mortality in nine European countries: a retrospective  
28 observational study. *Lancet* 2014; 383: 1824-30.  
29
- 30 4 Seago JA, Williamson A, Atwood C. Longitudinal analyses of nurse staffing and patient outcomes more about failure to rescue. *JONA*  
31 2006;36:13-21.  
32
- 33 5 Rafferty AM, Clarke SP, Coles J, et al. Outcomes of variation in hospital nurse staffing in English hospitals: Cross-sectional analysis of  
34 survey data and discharge records. *Int J Nurs Stud* 2007;44:175-82.  
35  
36  
37  
38  
39  
40  
41  
42  
43  
44  
45  
46  
47

- 1
- 2
- 3
- 4
- 5 6 Zingg W, Holmes A, Dettenkofer M, et al. Hospital organization, management, and structure for prevention of health-care-associated
- 6 infection: a systematic review and expert consensus. *Lancet Inf Dis* 2015;15:212-24.
- 7
- 8 7 Lang TA, Hodge M, Olson V, et al. Nurse-patient ratios: a systematic review on the effects of nurse staffing on patient, nurse employee,
- 9 and hospital outcomes. *JONA* 2004; 34: 326-37.
- 10
- 11 8 Needleman J, Buerhaus P, Pankratz VS, et al. Nurse staffing and inpatient hospital mortality. *N Eng J Med* 2011;364:1037-45.
- 12
- 13 9 Donaldson N, Bolton LB, Aydin C, et al. Impact of California's licensed nurse-patient ratios on unit-level nurse staffing and patient
- 14 outcomes. *Policy Polit Nurs Prac* 2005; 6:198-10.
- 15
- 16 10 Kane RL, Shamliyan TA, Mueller C, et al. The association of registered nurse staffing levels and patient outcomes: systematic review and
- 17 meta-analysis. *Med Care* 2007;45:1195-04.
- 18
- 19 11 Shuldham C, Parkin C, Firouzi A, et al. The relationship between nurse staffing and patient outcomes: A case study. *Int J Nurs Stud*
- 20 2009;46:986-92.
- 21
- 22 12 Van den Heede K, Sermeus W, Diya L, et al. Nurse staffing and patient outcomes in Belgian acute hospitals: cross-sectional analysis of
- 23 administrative data. *Int J Nurs Stud* 2009;46:928-39.
- 24
- 25 13 Tarnow-Mordi WO, Hau C, Warden A, et al. Hospital mortality in relation to staff workload: a 4-year study in an adult intensive-care
- 26 unit. *Lancet* 2000;356:185-89.
- 27
- 28 14 Lankshear AJ, Sheldon TA, Maynard A. Nurse staffing and healthcare outcomes: a systematic review on the effects of nurse staffing on
- 29 patient, nurse employee, and hospital outcomes. *JONA* 2005;28:163-74.
- 30
- 31 15 National Institute for Health and Care Excellence. Safe Staffing for nursing in adult inpatient wards in acute hospitals. Safe staffing
- 32 guideline1. 2014. [http://: www.nice.org.uk/sg1](http://www.nice.org.uk/sg1).
- 33
- 34 16 Rauhala A. The validity and feasibility of measurement tools for human resources management in nursing case of the RAFAELA system.
- 35 Doctoral dissertation. Department of Health Policy and Management, University of Kuopio. 2008.
- 36
- 37
- 38
- 39
- 40
- 41
- 42
- 43
- 44
- 45
- 46
- 47



- 17 Junttila JK, Koivu A, Fagerström L, Haatainen K, Nykänen P. 2016. Hospital mortality and optimality of nursing workload: a study on predictive validity of the RAFAELA Nursing Intensity and Staffing system. *Int J Nurs Stud* 2016;60:46-53.
- 18 Adomat R & Hewison A. Assessing patient category/dependence systems for determining the nurse/patient ratio in ICU and HDU: a review of approaches. *Nurs Manag* 2004;12:299-08.
- 19 Fagerström L, Lønning K, Andersen MH. RAFAELA system: a workforce planning tool for nurse staffing and human resource management. *J Nurs Manag* 2014;18:30-46.
- 20 Rauhala A, Kivimäki M, Fagerström L. What degree of work overload is likely to cause increased sickness absenteeism among nurse? Evidence from the RAFAELA patient classification system. *J Adv Nurs* 2007;57:286-95.
- 21 Fagerström L, Rainio A-K, Rauhala A, et al. Professional assessment of optimal nursing care intensity level a new method for resource allocation as an alternative to classical time studies. *Scand J Cari Sci* 2000;14:97-104.
- 22 Andersen MH, Lønning K, Fagerström L. Testing reliability and validity of the Oulu Patient Classification Instrument — The first step in evaluating the RAFAELA system in Norway. *Open J Nurs* 2014;4:303-11.
- 23 Kinnunen M. Learning from errors in organization – Factors preventing or making it possible. Doctoral thesis. University of Vaasa. *Acta Wasaensia*, 230.
- 24 Keistinen T, Kinnunen M. Increased patient safety with an Internet-based reporting system. *World Hospital Health Serv* 2008;44:37-9.
- 25 Spetz J, Donaldson N, Aydin C, et al. How many nurses per patient? Measurements of nurse staffing in health services research. *Health Serv Res* 2008 43:1674-92.
- 26 Fasioli DR, Fincke BG, Haddock KS. Going beyond patient classification systems to create an evidence-based staffing methodology. *J of Nurs Adm* 2011;41:434-9.
- 27 Cho SH, Hwang JH, Kim J. Nurse staffing and patient mortality in intensive care units. *Nurs Res* 2008;57:322-30.
- 28 Kerlin MP, Small DS, Cooney E, et al. A randomized trial of nighttime physician staffing in an intensive care unit. *N Engl J Med* 2013;368:2201-09.

- 1  
2  
3  
4  
5 29 Griffiths P, Ball J, Drennan J. et al. Nurse staffing and patient outcomes: Strengths and limitations of the evidence to inform policy and  
6 practice. A review and discussion paper based on evidence reviewed for the National Institute for Health and Care Excellence Safe  
7 Staffing guideline development. Int J Nurs Studies 2016. DOI: <http://dx.doi.org/10.1016/j.ijnurstu.2016.03.012>  
8  
9  
10 30 Needleman J, Buerhaus P, Mattke S, Stewart M, Zelevinsky K. Nurse-staffing levels and the quality of care in hospitals. N Engl J Med  
11 2002;346:1715-22.  
12  
13  
14  
15  
16  
17  
18  
19  
20  
21  
22  
23  
24  
25  
26  
27  
28  
29  
30  
31  
32  
33  
34  
35  
36  
37  
38  
39  
40  
41  
42  
43  
44  
45  
46  
47

For peer review only

Table 1. Optimal nursing intensity level per unit and mean daily values of workload per nurse, patients per nurse, total workload, OPCq per patient and nurse staff resources. Mean incidents and deaths per unit and day, and mean number of OPCq classifications per day.

| Ward. id | Optimal NI* level. lower bound | Optimal NI* level. upper bound | OPCq per nurse | Patients per nurse | Total OPCq points | OPCq per patient | No of nurses | One incident | Near Miss Event | Advers, Event | >1 Incident | Death | n   | OPCq classifications |
|----------|--------------------------------|--------------------------------|----------------|--------------------|-------------------|------------------|--------------|--------------|-----------------|---------------|-------------|-------|-----|----------------------|
| D1       | 18.90                          | 25.56                          | 21.06          | 1.48               | 251.22            | 14.20            | 12.03        | 0.09         | 0.06            | 0.02          | 0.01        | 0.04  | 365 | 17.70                |
| D2       | 21.85                          | 29.55                          | 24.45          | 1.60               | 308.81            | 15.28            | 12.74        | 0.13         | 0.07            | 0.04          | 0.02        | 0.07  | 362 | 20.18                |
| D3       | 21.88                          | 29.60                          | 25.98          | 1.89               | 355.99            | 13.75            | 13.98        | 0.26         | 0.11            | 0.08          | 0.03        | 0.08  | 365 | 25.90                |
| D4       | 16.85                          | 22.79                          | 23.88          | 1.41               | 425.36            | 16.87            | 17.80        | 0.05         | 0.02            | 0.01          | 0.00        | 0.08  | 365 | 25.19                |
| D5       | 15.99                          | 21.63                          | 21.92          | 1.41               | 350.84            | 15.52            | 16.15        | 0.12         | 0.08            | 0.04          | 0.02        | 0.05  | 365 | 22.62                |
| D6       | 14.54                          | 19.66                          | 17.58          | 1.24               | 243.46            | 14.18            | 13.75        | 0.07         | 0.05            | 0.04          | 0.01        | 0.02  | 330 | 17.15                |
| D7       | 25.47                          | 34.47                          | 33.83          | 2.48               | 343.10            | 13.62            | 10.12        | 0.04         | 0.02            | 0.01          | 0.00        | 0.00  | 364 | 25.17                |
| D8       | 14.36                          | 20.12                          | 22.84          | 1.38               | 249.46            | 16.50            | 10.88        | 0.26         | 0.11            | 0.05          | 0.03        | 0.18  | 362 | 15.10                |
| D9       | 20.05                          | 27.13                          | 25.12          | 1.34               | 392.29            | 18.69            | 15.76        | 0.13         | 0.05            | 0.03          | 0.02        | 0.08  | 365 | 20.96                |
| B1       | 16.14                          | 21.83                          | 20.40          | 1.49               | 182.62            | 13.75            | 8.95         | 0.12         | 0.09            | 0.07          | 0.02        | 0.06  | 341 | 13.29                |
| B2       | 20.37                          | 27.56                          | 25.13          | 2.00               | 290.05            | 12.61            | 11.59        | 0.23         | 0.16            | 0.10          | 0.06        | 0.08  | 365 | 23.04                |
| B3       | 17.16                          | 23.21                          | 19.94          | 1.47               | 171.98            | 13.54            | 8.59         | 0.20         | 0.11            | 0.07          | 0.06        | 0.05  | 365 | 12.69                |
| B4       | 19.65                          | 26.59                          | 24.16          | 1.82               | 292.34            | 13.24            | 12.11        | 0.11         | 0.07            | 0.05          | 0.01        | 0.13  | 365 | 22.09                |
| B5       | 21.47                          | 29.04                          | 29.16          | 2.00               | 544.95            | 14.59            | 18.73        | 0.20         | 0.16            | 0.10          | 0.01        | 0.16  | 365 | 37.34                |
| B6       | 18.50                          | 25.10                          | 23.29          | 1.77               | 355.67            | 13.18            | 15.37        | 0.08         | 0.05            | 0.03          | 0.02        | 0.08  | 365 | 26.95                |
| B7       | 23.27                          | 31.48                          | 28.04          | 1.88               | 474.66            | 14.90            | 17.01        | 0.12         | 0.08            | 0.01          | 0.02        | 0.05  | 365 | 31.85                |
| B8       | 18.87                          | 25.54                          | 23.17          | 1.68               | 131.87            | 14.04            | 6.21         | 0.13         | 0.10            | 0.02          | 0.02        | 0.02  | 177 | 9.45                 |
| B9       | 19.05                          | 25.78                          | 20.69          | 1.37               | 338.39            | 15.04            | 16.40        | 0.03         | 0.02            | 0.02          | 0.00        | 0.00  | 365 | 22.48                |
| B10      | 11.51                          | 15.58                          | 13.08          | 0.75               | 134.87            | 17.39            | 10.23        | 0.04         | 0.03            | 0.01          | 0.00        | 0.00  | 362 | 7.72                 |
| B11      | 12.16                          | 16.45                          | 8.65           | 0.49               | 108.10            | 17.52            | 12.38        | 0.02         | 0.01            | 0.00          | 0.00        | 0.00  | 365 | 6.17                 |
| B12      | 17.45                          | 23.60                          | 22.45          | 1.81               | 224.67            | 12.36            | 9.87         | 0.11         | 0.07            | 0.04          | 0.01        | 0.01  | 298 | 18.12                |
| B13      | 16.25                          | 21.98                          | 19.37          | 1.37               | 245.29            | 14.24            | 12.68        | 0.08         | 0.06            | 0.01          | 0.01        | 0.07  | 365 | 17.30                |
| B14      | 20.02                          | 27.09                          | 19.43          | 1.50               | 273.30            | 12.97            | 14.05        | 0.10         | 0.08            | 0.01          | 0.02        | 0.11  | 365 | 21.05                |
| C1       | 22.60                          | 30.60                          | 24.33          | 1.41               | 321.42            | 17.29            | 13.22        | 0.17         | 0.08            | 0.03          | 0.07        | 0.06  | 365 | 18.58                |
| C2       | 18.70                          | 25.30                          | 25.15          | 1.65               | 397.05            | 15.20            | 15.93        | 0.17         | 0.09            | 0.01          | 0.05        | 0.15  | 366 | 26.12                |
| C3       | 20.40                          | 27.60                          | 21.77          | 1.29               | 208.62            | 16.87            | 9.52         | 0.10         | 0.09            | 0.01          | 0.02        | 0.03  | 291 | 12.33                |
| C4       | 19.40                          | 26.30                          | 23.70          | 1.51               | 228.64            | 15.64            | 9.49         | 0.04         | 0.03            | 0.00          | 0.01        | 0.00  | 291 | 14.58                |
| A1       | 19.50                          | 26.40                          | 24.92          | 1.83               | 290.61            | 13.60            | 11.39        | 0.03         | 0.02            | 0.01          | 0.00        | 0.00  | 366 | 21.14                |

|       |       |       |       |      |        |       |       |      |      |      |      |      |        |       |
|-------|-------|-------|-------|------|--------|-------|-------|------|------|------|------|------|--------|-------|
| A2    | 25.60 | 42.10 | 39.84 | 2.81 | 510.25 | 14.21 | 12.83 | 0.04 | 0.03 | 0.02 | 0.00 | 0.00 | 225    | 35.94 |
| A3    | 33.50 | 45.30 | 40.54 | 2.85 | 607.06 | 14.22 | 15.06 | 0.04 | 0.02 | 0.02 | 0.00 | 0.00 | 366    | 42.64 |
| A4    | 16.80 | 22.70 | 20.29 | 1.33 | 430.29 | 15.18 | 21.19 | 0.10 | 0.05 | 0.02 | 0.02 | 0.04 | 366    | 28.30 |
| A5    | 12.30 | 14.90 | 13.33 | 0.97 | 165.18 | 13.85 | 12.34 | 0.15 | 0.10 | 0.08 | 0.04 | 0.00 | 366    | 11.95 |
| A6    | 11.00 | 14.20 | 11.16 | 0.70 | 117.12 | 16.05 | 10.57 | 0.09 | 0.06 | 0.02 | 0.01 | 0.01 | 360    | 7.31  |
| A7    | 8.90  | 12.00 | 9.29  | 0.54 | 91.18  | 17.36 | 9.67  | 0.09 | 0.06 | 0.02 | 0.01 | 0.00 | 363    | 5.24  |
| A8    | 21.10 | 28.50 | 24.45 | 1.48 | 273.20 | 16.50 | 11.24 | 0.02 | 0.02 | 0.01 | 0.00 | 0.06 | 364    | 16.54 |
| A9    | 15.10 | 20.50 | 20.57 | 1.49 | 198.98 | 13.89 | 9.51  | 0.14 | 0.12 | 0.03 | 0.04 | 0.00 | 315    | 14.52 |
| Total | 18.52 | 25.22 | 22.41 | 1.53 | 294.59 | 14.97 | 12.93 | 0.11 | 0.07 | 0.03 | 0.02 | 0.05 | 12 475 | 19.97 |

\*NI= nursing intensity. Optimal NI level refers to the established interval of optimal workload per nurse according to the PAONCIL measurement (expressed in OPCq points per nurse).

Table 2. Odds ratios (with 95% confidence intervals) for different types of adverse events and according to various categorisations of workload models, unstandardised estimates.

|                                    | Incident         | Near miss event  | Adverse event    | >1 incident      | Death            |
|------------------------------------|------------------|------------------|------------------|------------------|------------------|
| OPCq/nurse. position in interval   |                  |                  |                  |                  |                  |
| Below optimum                      | 0.67 (0.58-0.78) | 0.68 (0.56-0.82) | 0.66 (0.50-0.88) | 0.67 (0.47-0.95) | 0.55 (0.43-0.70) |
| Within optimum                     | 1                | 1                | 1                | 1                | 1                |
| Above optimum                      | 1.28 (1.13-1.45) | 1.13 (0.96-1.32) | 1.16 (0.93-1.45) | 1.25 (0.95-1.66) | 1.42 (1.19-1.69) |
| OPCq/nurse. position in interval/2 |                  |                  |                  |                  |                  |
| Below optimum                      | 0.73 (0.62-0.86) | 0.76 (0.62-0.92) | 0.82 (0.62-1.09) | 0.74 (0.52-1.06) | 0.67 (0.53-0.84) |
| Within optimum                     | 1                | 1                | 1                | 1                | 1                |
| Above optimum                      | 1.18 (1.02-1.36) | 1.10 (0.92-1.31) | 1.19 (0.92-1.54) | 1.18 (0.86-1.62) | 1.37 (1.12-1.67) |
| OPCq/nurse. position in interval×2 |                  |                  |                  |                  |                  |
| Below optimum                      | 0.55 (0.44-0.68) | 0.62 (0.48-0.80) | 0.66 (0.46-0.95) | 0.57 (0.35-0.93) | 0.38 (0.26-0.55) |
| Within optimum                     | 1                | 1                | 1                | 1                | 1                |
| Above optimum                      | 1.29 (1.11-1.50) | 1.21 (1.00-1.45) | 1.13 (0.86-1.47) | 1.02 (0.72-1.44) | 1.48 (1.21-1.80) |
| Patients/nurse. 3 equal groups     |                  |                  |                  |                  |                  |
| 1st                                | 0.74 (0.64-0.86) | 0.85 (0.71-1.02) | 0.79 (0.61-1.04) | 0.80 (0.58-1.10) | 0.47 (0.38-0.58) |
| 2nd                                | 1                | 1                | 1                | 1                | 1                |
| 3rd                                | 1.09 (0.95-1.25) | 1.18 (0.99-1.41) | 1.24 (0.96-1.58) | 0.95 (0.70-1.30) | 0.97 (0.81-1.17) |
| Patients/nurse. 5 equal groups     |                  |                  |                  |                  |                  |
| 1st                                | 0.68 (0.57-0.82) | 0.81 (0.64-1.01) | 0.87 (0.62-1.22) | 0.70 (0.47-1.05) | 0.36 (0.27-0.48) |
| 2nd                                | 0.89 (0.72-1.09) | 0.91 (0.70-1.18) | 0.86 (0.58-1.29) | 0.96 (0.61-1.49) | 0.84 (0.64-1.11) |
| 3rd                                | 1                | 1                | 1                | 1                | 1                |
| 4th                                | 0.97 (0.80-1.17) | 1.07 (0.84-1.35) | 1.25 (0.88-1.76) | 0.93 (0.62-1.42) | 1.10 (0.86-1.41) |
| 5th                                | 1.10 (0.92-1.31) | 1.16 (0.93-1.45) | 1.43 (1.03-1.97) | 0.90 (0.60-1.34) | 0.89 (0.70-1.13) |
| Patients/nurse. 7 equal groups     |                  |                  |                  |                  |                  |
| 1st                                | 0.63 (0.51-0.77) | 0.71 (0.55-0.91) | 0.75 (0.52-1.09) | 0.72 (0.45-1.14) | 0.28 (0.19-0.39) |

|                  |       |             |      |             |      |             |      |             |      |             |
|------------------|-------|-------------|------|-------------|------|-------------|------|-------------|------|-------------|
| 2nd              | 0.86  | (0.67-1.09) | 0.84 | (0.62-1.14) | 0.74 | (0.47-1.19) | 0.92 | (0.53-1.58) | 1.00 | (0.73-1.38) |
| 3rd              | 0.86  | (0.68-1.10) | 0.86 | (0.63-1.16) | 0.91 | (0.59-1.41) | 1.02 | (0.60-1.73) | 0.96 | (0.69-1.32) |
| 4th              | 1     |             | 1    |             | 1    |             | 1    |             | 1    |             |
| 5th              | 0.94  | (0.75-1.18) | 0.96 | (0.73-1.28) | 1.14 | (0.76-1.70) | 0.92 | (0.55-1.54) | 1.22 | (0.91-1.64) |
| 6th              | 1.08  | (0.88-1.33) | 1.10 | (0.85-1.42) | 1.20 | (0.83-1.74) | 1.12 | (0.71-1.79) | 1.25 | (0.95-1.65) |
| 7th              | 1.03  | (0.84-1.26) | 1.04 | (0.80-1.34) | 1.24 | (0.86-1.79) | 1.00 | (0.63-1.60) | 0.82 | (0.61-1.10) |
| Number of events | 1 367 |             | 848  |             | 400  |             | 246  |             | 636  |             |

The table summarises results from 30 different models estimated on 12 475 calendar days, representing 36 different wards at four different hospital units.

Table 3. Odds ratios (with 95% confidence intervals) for different types of incidents and according to various

1  
2  
3  
4  
5  
6  
7  
8  
9  
10  
11  
12  
13  
14  
15  
16  
17  
18  
19  
20  
21  
22  
23  
24  
25  
26  
27  
28  
29  
30  
31  
32  
33  
34  
35  
36  
37  
38  
39  
40  
41  
42  
43  
44  
45  
46  
47

categorisations of workload models. standardised for unit-specific effects.

|                                    | Incident         | Patient affected | Harm to patient  | >1 incident      | Death            |
|------------------------------------|------------------|------------------|------------------|------------------|------------------|
| OPCq/nurse. position in interval   |                  |                  |                  |                  |                  |
| Below optimum                      | 0.76 (0.65-0.90) | 0.76 (0.62-0.92) | 0.82 (0.61-1.10) | 0.71 (0.49-1.02) | 0.77 (0.60-1.00) |
| Within optimum                     | 1                | 1                | 1                | 1                | 1                |
| Above optimum                      | 1.27 (1.11-1.45) | 1.11 (0.94-1.31) | 1.13 (0.90-1.43) | 1.35 (1.00-1.82) | 1.41 (1.16-1.70) |
| OPCq/nurse. position in interval/2 |                  |                  |                  |                  |                  |
| Below optimum                      | 0.82 (0.70-0.97) | 0.84 (0.68-1.02) | 1.02 (0.76-1.37) | 0.78 (0.54-1.13) | 0.87 (0.68-1.12) |
| Within optimum                     | 1                | 1                | 1                | 1                | 1                |
| Above optimum                      | 1.17 (1.01-1.36) | 1.10 (0.91-1.32) | 1.17 (0.90-1.53) | 1.26 (0.90-1.76) | 1.34 (1.08-1.66) |
| OPCq/nurse. position in interval×2 |                  |                  |                  |                  |                  |
| Below optimum                      | 0.63 (0.50-0.80) | 0.71 (0.54-0.93) | 0.85 (0.58-1.25) | 0.62 (0.37-1.02) | 0.68 (0.46-1.01) |
| Within optimum                     | 1                | 1                | 1                | 1                | 1                |
| Above optimum                      | 1.21 (1.03-1.42) | 1.16 (0.95-1.42) | 1.14 (0.85-1.53) | 0.98 (0.67-1.44) | 1.45 (1.16-1.82) |
| Patients/nurse. 3 equal groups     |                  |                  |                  |                  |                  |
| 1st                                | 0.85 (0.72-1.01) | 0.94 (0.77-1.16) | 0.88 (0.65-1.19) | 0.96 (0.67-1.37) | 0.85 (0.68-1.07) |
| 2nd                                | 1                | 1                | 1                | 1                | 1                |
| 3rd                                | 1.16 (0.99-1.37) | 1.17 (0.95-1.43) | 1.03 (0.77-1.38) | 1.18 (0.83-1.67) | 1.19 (0.96-1.48) |
| Patients/nurse. 5 equal groups     |                  |                  |                  |                  |                  |
| 1st                                | 0.79 (0.64-0.98) | 0.91 (0.70-1.19) | 1.00 (0.68-1.48) | 0.89 (0.57-1.39) | 0.82 (0.61-1.10) |
| 2nd                                | 0.95 (0.77-1.17) | 0.97 (0.75-1.27) | 0.89 (0.59-1.34) | 1.03 (0.66-1.61) | 0.93 (0.70-1.23) |
| 3rd                                | 1                | 1                | 1                | 1                | 1                |
| 4th                                | 0.95 (0.78-1.15) | 1.01 (0.79-1.29) | 1.11 (0.78-1.58) | 0.97 (0.63-1.48) | 1.09 (0.85-1.41) |
| 5th                                | 1.31 (1.06-1.62) | 1.23 (0.95-1.60) | 1.24 (0.85-1.82) | 1.34 (0.85-2.12) | 1.25 (0.94-1.67) |
| Patients/nurse. 7 equal groups     |                  |                  |                  |                  |                  |
| 1st                                | 0.72 (0.57-0.92) | 0.78 (0.58-1.05) | 0.89 (0.58-1.37) | 0.91 (0.54-1.53) | 0.70 (0.48-1.02) |
| 2nd                                | 0.93 (0.72-1.19) | 0.91 (0.67-1.25) | 0.81 (0.50-1.31) | 1.00 (0.58-1.74) | 1.17 (0.84-1.62) |
| 3rd                                | 0.89 (0.69-1.13) | 0.90 (0.66-1.22) | 0.99 (0.64-1.55) | 1.06 (0.62-1.81) | 0.98 (0.71-1.37) |
| 4th                                | 1                | 1                | 1                | 1                | 1                |
| 5th                                | 0.95 (0.75-1.19) | 0.94 (0.71-1.26) | 1.16 (0.77-1.74) | 0.96 (0.57-1.63) | 1.14 (0.84-1.54) |
| 6th                                | 1.05 (0.84-1.31) | 0.99 (0.75-1.29) | 0.97 (0.66-1.44) | 1.21 (0.75-1.97) | 1.25 (0.93-1.68) |
| 7th                                | 1.41 (1.10-1.80) | 1.23 (0.91-1.66) | 1.19 (0.78-1.83) | 2.07 (1.20-3.56) | 1.39 (0.98-1.95) |

1  
2  
3  
4  
5  
6  
7  
8  
9  
10  
11  
12  
13  
14  
15  
16  
17  
18  
19  
20  
21  
22  
23  
24  
25  
26  
27  
28  
29  
30  
31  
32  
33  
34  
35  
36  
37  
38  
39  
40  
41  
42  
43  
44  
45  
46  
47

|                  |       |     |     |     |     |
|------------------|-------|-----|-----|-----|-----|
| Number of events | 1 367 | 848 | 400 | 246 | 636 |
|------------------|-------|-----|-----|-----|-----|

---

The table summarises results from 30 different models estimated on 12 475 calendar days, representing 36 different wards at four different hospital units.

Estimates for unit-specific effects are not displayed here.

For peer review only

Table 4. Odds ratios (with 95% confidence intervals) for different types of incidents and according to various categorizations of workload models,



standardized for unit-specific effects and effects of weekday, holiday and season.

|                                    | Incident |             | Patient affected |             | Harm to patient |             | >1 incident |             | Death |             |
|------------------------------------|----------|-------------|------------------|-------------|-----------------|-------------|-------------|-------------|-------|-------------|
| OPCq/nurse. position in interval   |          |             |                  |             |                 |             |             |             |       |             |
| Below optimum                      | 0.79     | (0.67-0.93) | 0.78             | (0.64-0.96) | 0.85            | (0.63-1.14) | 0.73        | (0.50-1.07) | 0.78  | (0.60-1.00) |
| Within optimum                     | 1        |             | 1                |             | 1               |             | 1           |             | 1     |             |
| Above optimum                      | 1.24     | (1.08-1.42) | 1.08             | (0.91-1.28) | 1.11            | (0.88-1.41) | 1.32        | (0.98-1.79) | 1.43  | (1.18-1.73) |
| OPCq/nurse. position in interval/2 |          |             |                  |             |                 |             |             |             |       |             |
| Below optimum                      | 0.85     | (0.72-1.01) | 0.86             | (0.71-1.06) | 1.05            | (0.78-1.41) | 0.81        | (0.56-1.18) | 0.87  | (0.68-1.20) |
| Within optimum                     | 1        |             | 1                |             | 1               |             | 1           |             | 1     |             |
| Above optimum                      | 1.15     | (0.98-1.33) | 1.07             | (0.89-1.29) | 1.15            | (0.88-1.50) | 1.24        | (0.88-1.73) | 1.35  | (1.08-1.67) |
| OPCq/nurse. position in interval×2 |          |             |                  |             |                 |             |             |             |       |             |
| Below optimum                      | 0.66     | (0.52-0.83) | 0.75             | (0.57-0.98) | 0.91            | (0.62-1.35) | 0.66        | (0.39-1.10) | 0.69  | (0.47-1.02) |
| Within optimum                     | 1        |             | 1                |             | 1               |             | 1           |             | 1     |             |
| Above optimum                      | 1.17     | (0.99-1.38) | 1.11             | (0.91-1.37) | 1.10            | (0.82-1.48) | 0.95        | (0.65-1.39) | 1.47  | (1.17-1.85) |
| Patients/nurse. 3 equal groups     |          |             |                  |             |                 |             |             |             |       |             |
| 1st                                | 0.89     | (0.75-1.05) | 0.98             | (0.80-1.21) | 0.90            | (0.66-1.23) | 1.01        | (0.71-1.44) | 0.86  | (0.68-1.08) |
| 2nd                                | 1        |             | 1                |             | 1               |             | 1           |             | 1     |             |
| 3rd                                | 1.13     | (0.96-1.33) | 1.15             | (0.94-1.41) | 1.03            | (0.77-1.39) | 1.15        | (0.81-1.64) | 1.20  | (0.97-1.49) |
| Patients/nurse. 5 equal groups     |          |             |                  |             |                 |             |             |             |       |             |
| 1st                                | 0.84     | (0.68-1.04) | 0.97             | (0.75-1.27) | 1.05            | (0.71-1.55) | 0.96        | (0.61-1.51) | 0.83  | (0.61-1.12) |
| 2nd                                | 0.96     | (0.78-1.18) | 0.99             | (0.76-1.29) | 0.89            | (0.59-1.34) | 1.04        | (0.66-1.64) | 0.94  | (0.71-1.25) |
| 3rd                                | 1        |             | 1                |             | 1               |             | 1           |             | 1     |             |
| 4th                                | 0.93     | (0.77-1.14) | 1.00             | (0.78-1.27) | 1.11            | (0.78-1.58) | 0.95        | (0.62-1.46) | 1.11  | (0.86-1.43) |
| 5th                                | 1.25     | (1.01-1.55) | 1.20             | (0.92-1.56) | 1.24            | (0.84-1.82) | 1.30        | (0.82-2.06) | 1.27  | (0.95-1.69) |
| Patients/nurse. 7 equal groups     |          |             |                  |             |                 |             |             |             |       |             |
| 1st                                | 0.77     | (0.60-0.99) | 0.84             | (0.62-1.13) | 0.94            | (0.61-1.45) | 0.99        | (0.59-1.67) | 0.71  | (0.49-1.03) |
| 2nd                                | 0.95     | (0.74-1.22) | 0.93             | (0.68-1.27) | 0.81            | (0.50-1.31) | 1.03        | (0.59-1.80) | 1.18  | (0.85-1.64) |
| 3rd                                | 0.90     | (0.70-1.15) | 0.91             | (0.67-1.23) | 0.99            | (0.63-1.55) | 1.08        | (0.63-1.84) | 0.99  | (0.71-1.39) |
| 4th                                | 1        |             | 1                |             | 1               |             | 1           |             | 1     |             |
| 5th                                | 0.94     | (0.74-1.18) | 0.93             | (0.70-1.25) | 1.16            | (0.77-1.75) | 0.96        | (0.57-1.63) | 1.16  | (0.85-1.57) |
| 6th                                | 1.02     | (0.82-1.28) | 0.97             | (0.74-1.27) | 0.97            | (0.65-1.45) | 1.20        | (0.74-1.95) | 1.26  | (0.94-1.70) |
| 7th                                | 1.34     | (1.05-1.72) | 1.19             | (0.88-1.61) | 1.18            | (0.76-1.83) | 2.02        | (1.16-3.50) | 1.42  | (1.00-2.01) |

Number of events 1 367 848 400 246 636

The table summarises results from 30 different models estimated on 12,475 calendar days, representing 36 different wards at four different hospital units. Estimates for unit-specific effects and effects of weekday, holiday and season are not displayed here.

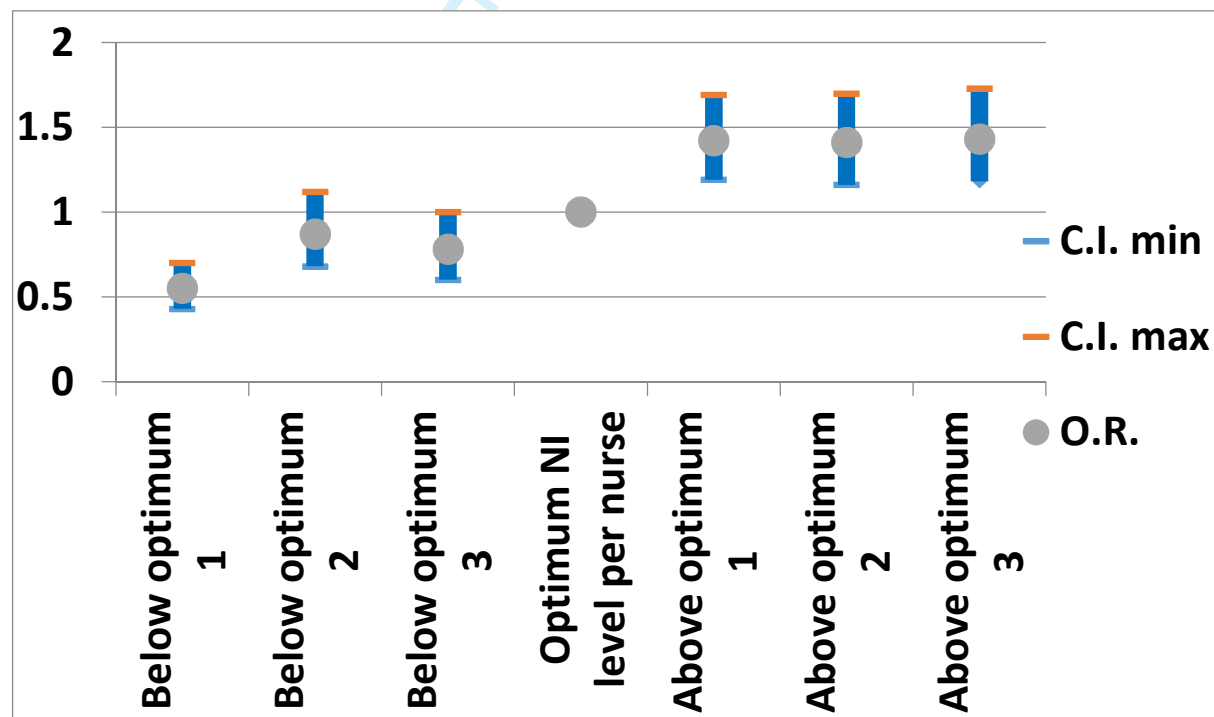

Figure 1: Risk for mortality (Odds Ratios=O.R. & Confidence Interval=C.I.) versus daily optimal nursing intensity level, below optimum and above optimum. 1=unstandardized estimates, 2= standardized for unit-fixed effects, 3=standardized for unit-fixed effects and weekdays, holidays, and seasons.

## STROBE Statement—checklist of items that should be included in reports of observational studies

|                              | Item No | Recommendation                                                                                                                                                                                                                |
|------------------------------|---------|-------------------------------------------------------------------------------------------------------------------------------------------------------------------------------------------------------------------------------|
| <b>Title and abstract</b>    | 1       | (a) Indicate the study's design with a commonly used term in the title or the abstract<br>(b) Provide in the abstract an informative and balanced summary of what was done and what was found<br><a href="#">Page 1 and 3</a> |
| <b>Introduction</b>          |         |                                                                                                                                                                                                                               |
| Background/rationale         | 2       | Explain the scientific background and rationale for the investigation etc. <a href="#">Page 4-5</a>                                                                                                                           |
| Objectives                   | 3       | State specific objectives, including any prespecified hypotheses. <a href="#">Page 5</a>                                                                                                                                      |
| <b>Methods</b>               |         |                                                                                                                                                                                                                               |
| Study design                 | 4       | Present key elements of study design early in the paper, <a href="#">page 5</a>                                                                                                                                               |
| Setting                      | 5       | Describe the setting, locations, and relevant dates, including periods of recruitment, exposure, follow-up, and data collection, <a href="#">page 5-6</a>                                                                     |
| Participants                 | 6       | <a href="#">Page 6-7</a>                                                                                                                                                                                                      |
| Variables                    | 7       | Clearly define all outcomes, exposures, predictors, potential confounders, and effect modifiers. Give diagnostic criteria, if applicable, <a href="#">page 7</a>                                                              |
| Data sources/<br>measurement | 8*      | For each variable of interest, give sources of data and details of methods of assessment (measurement). Describe comparability of assessment methods if there is more than one group, <a href="#">page 6-7</a>                |
| Bias                         | 9       | Describe any efforts to address potential sources of bias, <a href="#">page 7-8</a>                                                                                                                                           |
| Study size                   | 10      | Explain how the study size was arrived at, <a href="#">page 6-7</a>                                                                                                                                                           |
| Quantitative variables       | 11      | Explain how quantitative variables were handled in the analyses. If applicable, describe which groupings were chosen and why, <a href="#">page 6-8</a>                                                                        |
| Statistical methods          | 12      | <a href="#">Page 7-8</a>                                                                                                                                                                                                      |
|                              |         |                                                                                                                                                                                                                               |
|                              |         |                                                                                                                                                                                                                               |
|                              |         |                                                                                                                                                                                                                               |

Continued on next page

**Results**

---

|              |     |                                     |
|--------------|-----|-------------------------------------|
| Participants | 13* | <a href="#">Page 17-18, Table 1</a> |
|--------------|-----|-------------------------------------|

---

---

|                  |     |                                     |
|------------------|-----|-------------------------------------|
| Descriptive data | 14* | <a href="#">Page 17-18, Table 1</a> |
|------------------|-----|-------------------------------------|

---

---

|              |     |                                                |
|--------------|-----|------------------------------------------------|
| Outcome data | 15* | <a href="#">Page 8-10, Table 2-4, Figure 1</a> |
|--------------|-----|------------------------------------------------|

---

---

|              |    |                           |
|--------------|----|---------------------------|
| Main results | 16 | <a href="#">Page 8-10</a> |
|--------------|----|---------------------------|

---

---

|                |    |   |
|----------------|----|---|
| Other analyses | 17 | - |
|----------------|----|---|

---

**Discussion**

---

|             |    |                         |
|-------------|----|-------------------------|
| Key results | 18 | <a href="#">page 10</a> |
|-------------|----|-------------------------|

---

|             |    |                         |
|-------------|----|-------------------------|
| Limitations | 19 | <a href="#">Page 12</a> |
|-------------|----|-------------------------|

---

|                |    |                         |
|----------------|----|-------------------------|
| Interpretation | 20 | <a href="#">Page 12</a> |
|----------------|----|-------------------------|

---

|                  |    |                         |
|------------------|----|-------------------------|
| Generalisability | 21 | <a href="#">Page 12</a> |
|------------------|----|-------------------------|

---

**Other information**

---

|         |    |                         |
|---------|----|-------------------------|
| Funding | 22 | <a href="#">Page 13</a> |
|---------|----|-------------------------|

---

# BMJ Open

## OPTIMAL NURSING WORKLOAD, PATIENT SAFETY INCIDENTS AND MORTALITY – AN OBSERVATIONAL STUDY FROM FINLAND

|                                 |                                                                                                                                                                                                       |
|---------------------------------|-------------------------------------------------------------------------------------------------------------------------------------------------------------------------------------------------------|
| Journal:                        | <i>BMJ Open</i>                                                                                                                                                                                       |
| Manuscript ID                   | bmjopen-2017-016367.R1                                                                                                                                                                                |
| Article Type:                   | Research                                                                                                                                                                                              |
| Date Submitted by the Author:   | 22-Jun-2017                                                                                                                                                                                           |
| Complete List of Authors:       | Fagerström, Lisbeth; Åbo Akademi University, Faculty of Education and Welfare; University College of Southeast Norway, Kinnunen, Marina; Vaasan keskussairaala Saarela, Jan; Åbo Akademi University   |
| <b>Primary Subject Heading</b>: | Nursing                                                                                                                                                                                               |
| Secondary Subject Heading:      | Health services research                                                                                                                                                                              |
| Keywords:                       | Health & safety < HEALTH SERVICES ADMINISTRATION & MANAGEMENT, Human resource management < HEALTH SERVICES ADMINISTRATION & MANAGEMENT, Risk management < HEALTH SERVICES ADMINISTRATION & MANAGEMENT |
|                                 |                                                                                                                                                                                                       |

SCHOLARONE™  
Manuscripts

Only

1  
2  
3 **OPTIMAL NURSING WORKLOAD, PATIENT SAFETY INCIDENTS AND**  
4 **MORTALITY – AN OBSERVATIONAL STUDY FROM FINLAND**  
5  
6  
7

8 **Authors:**

9 Professor Lisbeth Fagerström, PhD,

10 Åbo Akademi University, Faculty of Education and Welfare Studies, Vaasa, Finland;

11  
12  
13 University College of Southeast Norway, Faculty of Healthc and Social Sciences, Drammen,  
14 Norway  
15

16  
17  
18  
19  
20 Chief Director of Nursing Marina Kinnunen, PhD

21  
22 Vaasa Central Hospital, Vaasa, Finland  
23

24  
25  
26  
27 Professor Jan Saarela, PhD,

28  
29 Åbo Akademi University, Faculty of Education and Welfare Studies, Vaasa, Finland;

30  
31 University of Helsinki, Swedish School of Social Science, Helsinki, Finland  
32  
33  
34

35 **Corresponding Author:**

36  
37 Professor Lisbeth Fagerström, Faculty of Education and Welfare Studies, Åbo Akademi  
38 University, Strandgatan 2, 65101 Vaasa, Finland. Mobile: +358414331097; +4745503873,  
39 phone number: +358 2 21531, email: [lisbeth.fagerstrom@abo.fi](mailto:lisbeth.fagerstrom@abo.fi); [lisbeth.fagerstrom@usn.no](mailto:lisbeth.fagerstrom@usn.no)  
40  
41  
42

43 Key words: nurse staffing, outcomes, patient safety, mortality, human resources  
44

45  
46 Word count: 3 502 words.  
47  
48  
49  
50  
51  
52  
53  
54  
55  
56  
57  
58  
59  
60

## Abstract

**Objective** To investigate whether the recommended daily workload per nurse (OPC/nurse) as measured by the RAFAELA system correlates with different types of patient safety incidents and with patient mortality, and to compare this interrelation with that based on the standard patients-to-nurse classification.

**Setting** We obtained data from 36 units from four Finnish hospitals. One was a tertiary acute care hospital, and the three others were secondary acute care hospitals.

**Participants** Patients' nursing intensity (249,123 classifications), nursing resources, patient safety incidents and patient mortality were collected on the daily basis during one year, corresponding to 12,475 data points. Associations between work intensity per nurse and patient safety incidents or mortality were estimated using logistic regression models. Regressions were estimated without any control variables, and by adjusting for ward-specific effects, and effects of weekday, holiday and season.

**Primary and secondary outcome measures:** Main outcome measures were patient safety incidents and death of a patient.

**Results** When the daily workload per nurse was above the recommended optimum, the adjusted odds for a patient safety incident were 1.24 (95% CI: 1.08-1.42) than if it was at optimum, and 0.79 (95% CI: 0.67-0.93) when it was below the optimum. Corresponding estimates for the odds ratios of patient mortality were 0.78 (95% CI: 0.60-1.00) and 1.43 (95% CI: 1.18-1.73), respectively. Models estimated on basis of the RAFAELA classification system generally provided larger effect sizes, greater statistical power, and better model fit than those based on the standard patients-to-nurse classification.

**Conclusions** We have demonstrated an association between daily workload per nurse and patient safety incidents and mortality. Optimal resource allocation is needed for successful leadership, clinical governance, in order to prevent safety incidents and reducing patient mortality. Future studies may attempt to include physicians' patient-related direct time.

### Strengths and limitations of this study

- The study is the first to assess the relationship between optimal nursing workload and outcomes based on data obtained on a daily basis
- The study provides evidence to suggest that the traditional nurse staffing method (the patients-to-nurse ratio) may fail to control for patient severity and case mix
- Analyses of patient characteristics, such as age, sex and diagnoses, were not conducted because the instrument used takes them into account
- The study did not address the potential influence of skill-mix, competence level, work experience, or the professionals' patient-related direct time

### Introduction

Many studies have shown that insufficient nurse staffing in hospital-based care, negatively affects outcomes such as mortality, infections, and failure to rescue (1-6). However, the results are inconsistent and indicate a complex and non-linear relationship between nursing workload (NWL), mortality, and other patient outcomes (7-12). The strength of the evidence underpinning the association between nurse staffing and outcomes in previous studies can be challenged. Poor research designs, measurement problems, and/or imprecise data, that do not take into account daily variations in patients' care needs may contribute to the mixed findings (8). Higher nurse staffing and richer skill mix are associated with improved patient outcomes (2,3,10). Therefore, higher ratios have been recommended for improving patient safety and outcomes (1,9). However, it is difficult to set fixed, standard patient-to-nurse ratios for units in acute care hospitals, as evidenced in systematic reviews and other studies (7,10,13-15). Staffing levels must instead match patients' nursing care needs (8,16,18).

The RAFAELA system is a patient classification system developed in the 1990s in Finland (16, 19). It differs from most patient classification systems while using daily data on patients' care needs and the workload per nurse, and hence not simply using the common system with fixed patient-to-nurse ratios. The main purpose of the RAFAELA system is to ensure an optimal nursing workload (NWL) by appropriate allocation of nurse staff resources. An optimal NWL is defined as a situation when the patients' care needs are in balance with the nursing resources and the working conditions are favorable for good nursing care (19-22). Measuring NWL by the RAFAELA system is based on daily assessments of the patients' care needs and the registration of the nursing staff resources. The optimal NWL is determined by



1  
2  
3 the Professional Assessment of Optimal Nursing Care Intensity Level (PAONCIL) method.  
4 This means that the daily measured NWL is to be compared with the established optimal  
5 NWL for that specific ward. When the actual NWL is at the optimal level, the resources are  
6 considered to be allocated appropriately.  
7  
8  
9

10 We have only found two studies on the relationship between optimal NWL and patient  
11 outcomes. Needleman et al (8) found a significant association between patient mortality and  
12 increased exposure to unit shifts when nurse staffing was below the target level. In a recent  
13 study by Junttila et al (17), based on monthly means, the incidence rate of death when average  
14 daily NWL was above the optimal level was 13-fold than when the average daily NWL was  
15 below the optimal level. However, to our knowledge, no studies exist on the relationship  
16 between optimal NWL and daily outcomes based on analyses of daily levels. The aim of this  
17 observational study was therefore to investigate whether the optimal NWL, as a measure  
18 based on the RAFAELA system, correlates with patient safety incidents and patient mortality,  
19 using data collected on a daily basis. Also, we want to compare estimates based on the  
20 optimal NWL with those based on the standard patients-to-nurse ratios.  
21  
22  
23  
24  
25  
26  
27  
28

## 29 **METHODS**

### 30 **Study setting**

31  
32  
33 We obtained data from 36 units from four Finnish hospitals. One (A, 9 units) is a tertiary  
34 acute care hospital, whereas the three others (B, 14 units; C, 4 units; D, 9 units) are secondary  
35 acute care hospitals. Inclusion criteria were daily use of the RAFAELA system according to  
36 standards, reliable nursing intensity data as expressed in terms of a yearly reliability test done  
37 by parallel classifications (requirement is that unanimity is over 70 per cent), and applicable  
38 optimal nursing intensity level measured with the PAONCIL method (16,19-21). Units that  
39 had undergone major organizational changes over the previous year were excluded. The A  
40 and B data represent the period January 1 to December 31, 2012, and the C and D data  
41 represent the period January 1 to December 31, 2013.  
42  
43  
44  
45  
46  
47  
48  
49

50  
51 This study received approval from the chief administrative physicians of all four hospitals  
52 involved, and therefore no further ethical approval was necessary. We did not include any  
53 sensitive health-related data of patients in the study, or any information regarding  
54 characteristics of the nurses. The RAFAELA is owned by the Association of Finnish Local  
55  
56  
57  
58  
59  
60

1  
2  
3 and Regional Association Authorities and governed by non-commercial Finnish Consulting  
4 Group Ltd.  
5

### 6 7 **Measurement of NWL in the RAFAELA nursing intensity and staffing system** 8

9  
10 The RAFAELA is a standardized, person-centered, evidence-based system for nurse staffing  
11 that was developed in the 1990s (16, 19). The feasibility, validity, and reliability of the  
12 RAFAELA have been tested with good results (16, 17, 21). It is now used in about 90 per  
13 cent of the hospitals in Finland, and has lately been implemented in Iceland, the Netherlands,  
14 Sweden, and Norway (22). A requirement for users of the RAFAELA system is that the  
15 interrater reliability for nursing intensity measurements should be tested yearly.  
16  
17  
18  
19

20  
21 The daily nursing intensity of each unit is assessed by all the responsible registered nurses on  
22 each day. One registered nurse usually classify 1 to 6 patients per day. The assessment is done  
23 by classifying the patient's care needs by the Oulu Patient Classification Q (OPC) instrument.  
24 This instrument consists of six sub-areas of nursing care. The nursing intensity level varies  
25 from 6 to 24 points for an individual patient per calendar day (16, 19). The nurses' workload  
26 is calculated by dividing the total amount of nursing intensity points on the unit (e.g. 350),  
27 with the number of nurses who take care of patients (e.g. 12) during the same 24 hours. In this  
28 example, the patient-related NWL will then be 29.2 OPC points per nurse (referred to as  
29 OPC/nurse).  
30  
31  
32  
33  
34  
35

36  
37 The underlying assumption of the RAFAELA system is that the nature and characteristics of  
38 nursing care differ between wards and therefore the recommended optimal NWL of each ward  
39 has to be determined by the PAONCIL method. The development, testing and description of  
40 this method has been reported in several publications (16,19-22). Thus the method is used to  
41 assess each ward's recommended optimal NWL including various contextual and  
42 organizational factors (21). The recommendation is that the optimal NWL has to be  
43 reassessed by conducting the PAONCIL study every second year. The optimal levels used in  
44 this study were not older than 2-3 years. The basic idea of the RAFAELA system is that the  
45 observed NWL (e.g. 29.2 points/nurse) is to be compared with the established and  
46 recommended optimal level for the same unit (e.g. 22-30 points/nurse). If the observed NWL  
47 lies within the established limits, the nursing intensity can be considered to be at the optimal  
48 level.  
49  
50  
51  
52  
53  
54  
55  
56  
57  
58  
59  
60

1  
2  
3 The data we use in this paper consists of daily measurements based on the RAFAELA system  
4 (19). They correspond to every admitted patient's nursing intensity during one year, and were  
5 based on 249,123 classifications of patients' nursing intensity (OPC classifications). Each  
6 day, the patient-related nurse resources were also recorded, using a standardized model where  
7 non-patient related time was excluded. Apart from each day's staff data (OPC/patient,  
8 OPC/nurse, etc.), there was daily information also on patient incidents and patient mortality.

9  
10  
11  
12  
13 All data was collected during a period of one year, meaning that there were 12,475 data points  
14 (not approximately 13,140, since some wards were closed for shorter periods, foremost  
15 because of holidays). Table 1 provides the central variables of the data in terms of each unit's  
16 optimal workload (the PAONCIL level), daily mean number of classified patients, daily mean  
17 number of OPC classifications, total OPC points, nursing staff resources, number of patients  
18 per nurse, OPC points per nurse, incidents, and deaths.

19  
20  
21  
22  
23  
24 (Table 1 about here)

## 25 26 27 **Outcomes**

28  
29  
30 Data on incidents were collected daily from The Reporting System for Safety Incidents in  
31 Health Care Organizations (HaiPro), which is a comprehensive and standardized patient  
32 safety system in Finland (23, 24). As defined by HaiPro, an incident is a safety hazard that  
33 may harm or harm the patient. Incidents are classified into 14 categories (24), but there are  
34 two main categories: near miss, which may have caused harm to the patient, but was  
35 prevented by chance or by timely preventive actions, and adverse events, which are negative  
36 events that caused harm to the patient. Here, we categorise the incidents into four types: (1)  
37 whether at least one incident, of any type, occurred (Incident), (2) whether a patient was  
38 affected to any degree (Patient affected), (3) whether the incident caused harm to the patient  
39 (Harm to patient), and (4) whether there was more than one incident, of any type, on the same  
40 day (>1 incident). In addition, we use patient mortality (Death) as a fifth type of adverse  
41 event. The mortality data were retrieved from the local mortality register of each hospital.

## 42 43 44 45 46 47 48 49 50 **Statistical analyses**

51  
52  
53 Using logistic regression analyses, associations were estimated on the daily level between  
54 nursing intensity per nurse in relation to the optimal level and each type of outcome, i.e., each  
55  
56  
57  
58  
59  
60

1  
2  
3 of the four types of incidents as measured by the HaiPro patient safety reporting system and  
4 patient mortality. Models were estimated (1) without any control variables, (2) by adjusting  
5 for ward-specific effects, and (3) by adjusting for effects of both ward-specific effects and  
6 effects of weekday, holiday and season. Parallel analyses were performed for the patient-to-  
7 nurse ratio, which is an alternative and standard measure of NWL.  
8  
9

10  
11  
12 In the next section, we report results in which evaluations based on the RAFAELA system  
13 were assessed using the standard version of the optimal level, i.e., with a  $\pm 15\%$  deviation  
14 from the optimal nursing intensity point (16, 19, 21), and in which the patient-to-nurse  
15 method was assessed using a categorization with three equal groups. The results reported (in  
16 Table 2), were consequently based on 30 different regressions. Model fit indices are provided  
17 to facilitate comparisons between regressions based on different sets of variables, and  
18 between regressions based on the RAFAELA system and the standard patients-to-nurse  
19 measure. The analyses were performed using SPSS 21. All estimates are expressed in terms of  
20 odds ratios with 95% confidence intervals.  
21  
22  
23  
24  
25

## 26 27 28 **RESULTS**

29  
30 Unadjusted odds ratios for the associations between nursing workload and different types of  
31 patient incidents are reported in the first (upper) panel of Table 2. When nurses' daily  
32 workload according to the RAFAELA system (OPC/nurse) was above the recommended  
33 optimal level, the odds ratio of an incident was 1.28 (95% CI: 1.13-1.45) than if the workload  
34 was at the recommended optimum. Corresponding odds ratios for the other types of incidents,  
35 patient affected, harm to patient, and >1 incident, were 1.13, 1.16, and 1.25, respectively.  
36 Odds ratios for patient mortality was even higher, or 1.42 (95% CI: 1.19-1.69). If OPC/nurse  
37 was below the recommended optimum, the odds ratio for incidents and patient mortality were,  
38 conversely lower, or around 0.67 for the different types of incidents, and 0.55 for patient  
39 mortality.  
40  
41  
42  
43  
44  
45  
46  
47

48 (Table 2 about here)

49  
50 When ward-specific effects were adjusted for (the second panel) the odds ratios diminished  
51 somewhat, which is expected, considering that the likelihood of incidents is ward-dependent.  
52 Nursing workload above the recommended optimum was associated with 11-35 per cent  
53 higher odds of an incident, depending on the type of incident, and 41 per cent higher odds of  
54  
55  
56  
57  
58  
59  
60

1  
2  
3 patient mortality, as compared to if it was at the recommended optimum. If OPC/nurse was  
4 below the recommended optimum, the odds ratio for an incident and for patient mortality was  
5 approximately 25 per cent lower. Adding the ward-specific effects improve model fit  
6 considerably (change in -2 log likelihood for 35 degrees of freedom is notably above the  
7 critical value of 49.8 at the 5 per cent level of statistical significance in all cases).  
8  
9

10  
11  
12 When variables for weekday, holiday, and season were additional adjusted, the odds ratios  
13 remain similar as above. This set of variables improved the model fit, except for the outcomes  
14 >1 incident and death (critical value is 19.7 for 11 degrees of freedom). The odds for incidents  
15 were in general least likely to occur on Saturdays and on holidays, whereas there were no  
16 obvious seasonal effects (estimates not shown).  
17  
18  
19

20  
21 The three lower panels provide results of parallel analyses when nursing workload was  
22 measured according to the standard patients-to-nurse ratio (patients/nurse). As compared with  
23 results based on the RAFAELA system, there are three main issues to be pointed out. First,  
24 effects sizes in terms of odds ratios were consistently smaller with the patients/nurse approach  
25 than with the OPC/nurse approach, no matter if unadjusted or adjusted models were being  
26 compared. For instance, in the fully adjusted model, the odds ratio of an incident was 1.13 if  
27 workload was in the highest one-third, and 0.89 if it was in the lowest one-third, as compared  
28 to if it was in the middle one-third. These effects were notably smaller than the estimated  
29 relative effect sizes for being above and below the recommended optimum according to the  
30 RAFAELA system, which were 1.24 and 0.79, respectively. Second, in almost all instances,  
31 the estimates of the patients/nurse approach had smaller statistical power in terms of wider  
32 confidence intervals (i.e., larger standard errors). For the same outcome and fully adjusted  
33 model as discussed above, for instance, estimates based on the patients/nurse approach were  
34 not statistically significant at the five per cent level, while those based on the OPC/nurse  
35 were. Third, when comparing results of the patients/nurse measurement to the OPC/nurse  
36 approach for otherwise similar models and outcomes, the model fit of the former was  
37 consistently poorer (the value of the -2 log likelihood was higher), although the difference  
38 was not very large.  
39  
40  
41  
42  
43  
44  
45  
46  
47  
48  
49

50  
51 We experimented also with other ways to categorize nursing workload. For OPC/nurse, we  
52 used an alternative with a halved deviation from the recommended optimal point, i.e.,  $\pm 7.5\%$   
53 instead of  $\pm 15\%$ , and with a doubled deviation, i.e.,  $\pm 30\%$  from the optimal point. The  
54 patient-to-nurse measurement was also assessed using alternative categorizations, such as five  
55  
56  
57  
58  
59

1  
2  
3 and seven equal groups, respectively. Results of these additional regressions supported the  
4 overall conclusions as reported above. In models based on the patient-to-nurse ratio,  
5 associations were mostly weaker, came with lower statistical power, and they were less  
6 systematic, as compared to models based on OPC/nurse measurement. Results of these  
7 additional analyses are not reported here, but they are available upon request.  
8  
9  
10

11 Hence, our analyses of the data suggest that, when it comes to predicting occurrence of patient  
12 incidents and mortality, measuring nursing workload according to the RAFAELA system is to  
13 be preferred above the standard patients-to-nurse approach.  
14  
15  
16  
17  
18

## 19 **DISCUSSION**

20  
21 Using daily level data from 36 wards at four Finnish hospitals, we found that the odds for a  
22 patient safety incident was 10-30 per cent higher, and the odds for patient mortality about 40  
23 per cent higher, if the nursing workload as measured by the RAFAELA system (OPC/nurse)  
24 was above the recommended optimum, as compared to if it was at optimum. If the OPC per  
25 nurse that means the workload per nurse was below the recommended optimum, the odds for  
26 a patient safety incident and mortality was approximately 25 per cent lower. A work situation  
27 below the recommended optimum means that the nurses have more additional time for caring  
28 and observing each patient, which may reduce the risk for adverse events and accordingly also  
29 prevent the patient's health condition from deteriorating.  
30  
31  
32  
33  
34  
35  
36

37 Previous research, by Donaldson et al. (9), did not find significant changes in patient safety  
38 associated with decreased NWL and could not confirm compliance with ratios per shift. Other  
39 studies used hospital-level administrative data that imprecisely allocated staffing to patients'  
40 care needs (8, 11). We think that such associations between nurse staffing, patient outcomes  
41 and mortality can be challenged (12, 17). Needleman et al. (8) found similar results between  
42 mortality and day-to-day, shift-to-shift variation in staffing, and Juntila et al. (17) between  
43 mortality and days with NWL over optimal level on a monthly level.  
44  
45  
46  
47  
48  
49

50 Reporting incidents are affected by several factors, e.g., staff's lack of motivation, knowledge,  
51 nursing staff shortage, stressful situations, and burn out. A reasonable argument is therefore  
52 that, when nursing work load is very high, that is a working situation when the nurse staff  
53 resources are too low and the nurses may not prioritize the registration of adverse events due  
54  
55  
56  
57  
58  
59  
60

1  
2  
3 to high workload, it will result in a situation where incidents connected to high NWL are  
4 underreported. The OPC-to-nurse calculation is therefore more detailed than the traditional  
5 patient-to-nurse ratio. While comparable to the HHPD model, the average number of  
6 productive nursing hours per patient, (23), its accuracy of nursing resources is higher. For  
7 example, if a nurse becomes sick during a shift and leaves the unit, the nurse in charge will  
8 deduct these hours from the unit's resources.  
9  
10  
11

12  
13 Our study provided results based on daily measures of all-in-hospital patients' actual nursing  
14 intensity, including detailed registration of used staff resources and the association with  
15 incidents and mortality on daily levels. The HaiPro database, upon which our analyses were  
16 based, meets WHO criteria for a good reporting system (24, 25). Another alternative method  
17 to analyze patient safety is Global Trigger Tool (GTT). However, it collects triggers and  
18 patient safety incidents from treatment periods, not on daily basis, whereas data on incidents  
19 collected from HaiPro can be targeted to certain days (25). Two of the authors are involved in  
20 a comprehensive patient safety study at Vaasa central hospital. In this study, associations  
21 between nursing intensity and incidents will be analyzed also by using GTT. The GTT is only  
22 looking for adverse events, but volunteering reporting on hazards also reveals near-miss  
23 situations, and thus significantly improves staff safety awareness.  
24  
25  
26  
27  
28  
29  
30  
31

32  
33 We found evidence that a staffing model based on daily measurement of individual patient  
34 care needs and optimal NWL can predict incidents and mortality rates better than a patient-to-  
35 nurse model, but this should be further tested and replicated in larger, longitudinal multicenter  
36 studies. Units that underwent major organisational changes over the previous year were  
37 excluded from our study because this may negatively influence the data quality, and we  
38 preferred to have a smaller data set that was considered trustworthy. The accuracy of the data  
39 used, in terms of NWL, incidents, and mortality, is highly reliable and probably better than in  
40 earlier studies on NWL and adverse outcomes.  
41  
42  
43  
44  
45  
46

47 As in any observational study, we could not control for all confounding factors, although we  
48 could control for ward-specific effects and effects of weekday, holiday and season. Also, it  
49 should be stressed that the staffing measurement determined by the RAFAELA system  
50 implicitly consider specific characteristics of each ward, such as organizational factors in  
51 terms of unit size, leadership, and physical environment (16,19,21).  
52  
53  
54  
55  
56  
57  
58  
59  
60

1  
2  
3 Our study nevertheless has certain limitations. Hospital settings are characterized by  
4 complexity regarding factors that may affect total NWL (1, 2, 13, 26, 27). While a list of  
5 central organizational and contextual factors were included in the PAONCIL instrument, we  
6 did not address the effects of skill-mix, competence level or work experience on patient  
7 outcomes. Physicians' patient-related direct time and health care support should also probably  
8 be included in further studies (28). Further analyses of other patient characteristics, such as  
9 age, sex or diagnoses, were not conducted because the OPC instrument takes these variables  
10 into account. Earlier studies have shown that the OPC instrument identifies patients'  
11 individual characteristics such as functional ability, symptoms of diseases, and the effect on  
12 nursing intensity of the most central patient characteristics (16,22). Hence, the measurement  
13 by the OPC covers the actual patient case mix for each day. However, the contribution of  
14 these aspects, especially age and sex, may be analyzed in more detail in further studies.  
15 Although this study was the first about the relationship between the recommended optimal  
16 NWL and daily outcomes, a multi-center study with several hospitals is needed to further test  
17 the generalizability of the results.  
18  
19  
20  
21  
22  
23  
24  
25  
26  
27

28 A strength of this study is that the analyses were conducted based upon nurses' independent  
29 classifications of patients' nursing intensity. The data used was based on a scientifically tested  
30 NWL system, which enabled comparisons (16), since the patient-case mix and patient severity  
31 groups require different staff resources to maximize positive patient outcomes (4, 8, 17, 30).  
32 NWL consequently ought to be monitored daily using reliable instruments to ensure good  
33 patient outcomes. Such optimal resource allocation is needed for successful leadership and  
34 clinical governance, and it is crucial for favorable outcomes, to preventing adverse events and  
35 to reducing patient mortality.  
36  
37  
38  
39  
40  
41

## 42 **Conclusions**

43  
44  
45 This study has showed that a work situation above the recommended optimal level increases  
46 the risk for adverse events and patient mortality. However, the resources for nursing staff are  
47 limited in all organizations therefore; nurse managers have to use available resources in the  
48 most optimal way. By using the recommended optimal NWL as a tool and golden standard for  
49 allocation of nursing staff, the nurse managers can optimize the resources and ensure patient  
50 outcomes. This study provided some new evidence to suggest that the traditional nurse  
51 staffing method, the patient-to-nurse ratio, fails to control for patients' severity and case mix.  
52 The staffing model based on the recommended optimal NWL may therefore be considered a  
53  
54  
55  
56  
57  
58  
59  
60



1  
2  
3 novel attempt to fill a gap in the existing knowledge on leadership and clinical governance.  
4 Our assumption is that nurses' workload should be monitored daily using reliable instruments  
5 to ensure good patient outcomes. Optimal resource allocation is needed for successful  
6 leadership and clinical governance and is crucial for favorable outcomes, preventing adverse  
7 events and reducing the mortality risk.  
8  
9  
10

11  
12  
13  
14 **Contributors** LF did the literature search. LF and JS designed the study. LF collected the  
15 data. JS prepared the data and performed the analyses. LF, MK and JS contributed to data  
16 interpretation, writing, and revision of the report.  
17  
18

19  
20 **Funding** The authors disclosed receipt of the following financial support for the research and  
21 authorship for this article: The State Research Funding of Vaasa Hospital District based on  
22 the Health Care Act (1326/2010).  
23  
24

25 **Competing interest** The authors declared no potential conflicts of interest with respect to the  
26 research, authorship, and/or publication of this article.  
27  
28

29 **Data Sharing** No additional data are available.  
30  
31

## 32 **References**

- 33  
34 1 Aiken LH, Clarke SP, Sloane DM, et al. Hospital nurse staffing and patient mortality,  
35 nurse burnout, and job dissatisfaction. *JAMA* 2002;288:1987-93.
- 36  
37 2 Aiken LH, Cimiotti JO, Sloane DM. Effects of nurse staffing and nurse education on  
38 patient deaths in hospitals with different nurse work environments. *Med Care*  
39 2011;49:1047-53.
- 40  
41 3 Aiken LH, Sloane DM, Bruyneel L, et al. Nurse staffing and education and hospital  
42 mortality in nine European countries: a retrospective observational study. *Lancet*  
43 2014; 383: 1824-30.
- 44  
45 4 Seago JA, Williamson A, Atwood C. Longitudinal analyses of nurse staffing and  
46 patient outcomes more about failure to rescue. *JONA* 2006;36:13-21.
- 47  
48 5 Rafferty AM, Clarke SP, Coles J, et al. Outcomes of variation in hospital nurse  
49 staffing in English hospitals: Cross-sectional analysis of survey data and discharge  
50 records. *Int J Nurs Stud* 2007;44:175-82.  
51  
52  
53  
54  
55  
56  
57  
58  
59  
60

- 1
  - 2
  - 3
  - 4
  - 5
  - 6
  - 7
  - 8
  - 9
  - 10
  - 11
  - 12
  - 13
  - 14
  - 15
  - 16
  - 17
  - 18
  - 19
  - 20
  - 21
  - 22
  - 23
  - 24
  - 25
  - 26
  - 27
  - 28
  - 29
  - 30
  - 31
  - 32
  - 33
  - 34
  - 35
  - 36
  - 37
  - 38
  - 39
  - 40
  - 41
  - 42
  - 43
  - 44
  - 45
  - 46
  - 47
  - 48
  - 49
  - 50
  - 51
  - 52
  - 53
  - 54
  - 55
  - 56
  - 57
  - 58
  - 59
  - 60
- 6 Zingg W, Holmes A, Dettenkofer M, et al. Hospital organization, management, and structure for prevention of health-care-associated infection: a systematic review and expert consensus. *Lancet Inf Dis* 2015;15:212-24.
- 7 Lang TA, Hodge M, Olson V, et al. Nurse-patient ratios: a systematic review on the effects of nurse staffing on patient, nurse employee, and hospital outcomes. *JONA* 2004; 34: 326-37.
- 8 Needleman J, Buerhaus P, Pankratz VS, et al. Nurse staffing and inpatient hospital mortality. *N Eng J Med* 2011;364:1037-45.
- 9 Donaldson N, Bolton LB, Aydin C, et al. Impact of California's licensed nurse-patient ratios on unit-level nurse staffing and patient outcomes. *Policy Polit Nurs Prac* 2005; 6:198-10.
- 10 Kane RL, Shamliyan TA, Mueller C, et al. The association of registered nurse staffing levels and patient outcomes: systematic review and meta-analysis. *Med Care* 2007;45:1195-04.
- 11 Shuldham C, Parkin C, Firouzi A, et al. The relationship between nurse staffing and patient outcomes: A case study. *Int J Nurs Stud* 2009;46:986-92.
- 12 Van den Heede K, Sermeus W, Diya L, et al. Nurse staffing and patient outcomes in Belgian acute hospitals: cross-sectional analysis of administrative data. *Int J Nurs Stud* 2009;46:928-39.
- 13 Tarnow-Mordi WO, Hau C, Warden A, et al. Hospital mortality in relation to staff workload: a 4-year study in an adult intensive-care unit. *Lancet* 2000;356:185-89.
- 14 Lankshear AJ, Sheldon TA, Maynard A. Nurse staffing and healthcare outcomes: a systematic review on the effects of nurse staffing on patient, nurse employee, and hospital outcomes. *JONA* 2005;28:163-74.
- 15 National Institute for Health and Care Excellence. Safe Staffing for nursing in adult inpatient wards in acute hospitals. Safe staffing guideline1. 2014. [http://: www.nice.org.uk/sg1](http://www.nice.org.uk/sg1).
- 16 Rauhala A. The validity and feasibility of measurement tools for human resources management in nursing case of the RAFAELA system. Doctoral dissertation. Department of Health Policy and Management, University of Kuopio. 2008.
- 17 Junttila JK, Koivu A, Fagerström L, Haatainen K, Nykänen P. 2016. Hospital mortality and optimality of nursing workload: a study on predictive validity of the RAFAELA Nursing Intensity and Staffing system. *Int J Nurs Stud* 2016;60:46-53.

- 18 Adomat R & Hewison A. Assessing patient category/dependence systems for determining the nurse/patient ratio in ICU and HDU: a review of approaches. *Nurs Manag* 2004;12:299-08.
- 19 Rauhala A & Fagerström L. Determining optimal nursing intensity: the RAFAELA method. *Journal of Advanced Nursing* 2004;45:351-359.
- 20 Rauhala A, Kivimäki M, Fagerström L. What degree of work overload is likely to cause increased sickness absenteeism among nurse? Evidence from the RAFAELA patient classification system. *J Adv Nurs* 2007;57:286-95.
- 21 Fagerström L, Rainio A-K, Rauhala A, et al. Professional assessment of optimal nursing care intensity level a new method for resource allocation as an alternative to classical time studies. *Scand J Cari Sci* 2000;14:97-104.
- 22 Andersen MH, Lønning K, Bjørnelv GM, Fagerström L. Nursing intensity and costs of nurse staffing demonstrated by the RAFAELA system: livers. *Kidney transplant recipients. J Nurs Manag* 2016;24:798-805.
- 23 Spetz J, Donaldson N, Aydın C, et al. How many nurses per patient? Measurements of nurse staffing in health services research. *Health Serv Res* 2008 43:1674-92.
- 24 Kinnunen M. Learning from errors in organization – Factors preventing or making it possible. Doctoral thesis. University of Vaasa. *Acta Wasaensia*, 230.
- 25 Holmström A-R. Learning from Medication errors in healthcare – how to make medication error reporting systems work? Doctoral dissertation. Faculty of Pharmacy, University of Helsinki. 2017.
- 26 Fasioli DR, Fincke BG, Haddock KS. Going beyond patient classification systems to create an evidence-based staffing methodology. *J of Nurs Adm* 2011;41:434-9.
- 27 Cho SH, Hwang JH, Kim J. Nurse staffing and patient mortality in intensive care units. *Nurs Res* 2008;57:322-30.
- 28 Kerlin MP, Small DS, Cooney E, et al. A randomized trial of nighttime physician staffing in an intensive care unit. *N Engl J Med* 2013;368:2201-09.
- 29 Griffiths P, Ball J, Drennan J. et al. Nurse staffing and patient outcomes: Strengths and limitations of the evidence to inform policy and practice. A review and discussion paper based on evidence reviewed for the National Institute for Health and Care Excellence Safe Staffing guideline development. *Int J Nurs Studies* 2016. DOI: <http://dx.doi.org/10.1016/j.ijnurstu.2016.03.012>
- 30 Needleman J, Buerhaus P, Mattke S, Stewart M, Zelevinsky K. Nurse-staffing levels and the quality of care in hospitals. *N Engl J Med* 2002;346:1715-22.

Table 1. Optimal work load, and daily mean values of workload, staff resources and adverse events per ward in the data

| Ward  | Optimal load, lower bound | Optimal load, upper bound | OPC per nurse | Patients per nurse | OPC per patient | Number of nurses | Incident | Patient affected | Harm to patient | >1 incident | Death | n    | Number of OPC classifications |       |
|-------|---------------------------|---------------------------|---------------|--------------------|-----------------|------------------|----------|------------------|-----------------|-------------|-------|------|-------------------------------|-------|
| D1    | 18,90                     | 25,56                     | 21,06         | 1,48               | 251,22          | 14,20            | 12,03    | 0,09             | 0,06            | 0,02        | 0,01  | 0,04 | 365                           | 17.70 |
| D2    | 21,85                     | 29,55                     | 24,45         | 1,60               | 308,81          | 15,28            | 12,74    | 0,13             | 0,07            | 0,04        | 0,02  | 0,07 | 362                           | 20.18 |
| D3    | 21,88                     | 29,60                     | 25,98         | 1,89               | 355,99          | 13,75            | 13,98    | 0,26             | 0,11            | 0,08        | 0,03  | 0,08 | 365                           | 25.90 |
| D4    | 16,85                     | 22,79                     | 23,88         | 1,41               | 425,36          | 16,87            | 17,80    | 0,05             | 0,02            | 0,01        | 0,00  | 0,08 | 365                           | 25.19 |
| D5    | 15,99                     | 21,63                     | 21,92         | 1,41               | 350,84          | 15,52            | 16,15    | 0,12             | 0,08            | 0,04        | 0,02  | 0,05 | 365                           | 22.62 |
| D6    | 14,54                     | 19,66                     | 17,58         | 1,24               | 243,46          | 14,18            | 13,75    | 0,07             | 0,05            | 0,04        | 0,01  | 0,02 | 330                           | 17.15 |
| D7    | 25,47                     | 34,47                     | 33,83         | 2,48               | 343,10          | 13,62            | 10,12    | 0,04             | 0,02            | 0,01        | 0,00  | 0,00 | 364                           | 25.17 |
| D8    | 14,36                     | 20,12                     | 22,84         | 1,38               | 249,46          | 16,50            | 10,88    | 0,26             | 0,11            | 0,05        | 0,03  | 0,18 | 362                           | 15.10 |
| D9    | 20,05                     | 27,13                     | 25,12         | 1,34               | 392,29          | 18,69            | 15,76    | 0,13             | 0,05            | 0,03        | 0,02  | 0,08 | 365                           | 20.96 |
| B1    | 16,14                     | 21,83                     | 20,40         | 1,49               | 182,62          | 13,75            | 8,95     | 0,12             | 0,09            | 0,07        | 0,02  | 0,06 | 341                           | 13.29 |
| B2    | 20,37                     | 27,56                     | 25,13         | 2,00               | 290,05          | 12,61            | 11,59    | 0,23             | 0,16            | 0,10        | 0,06  | 0,08 | 365                           | 23.04 |
| B3    | 17,16                     | 23,21                     | 19,94         | 1,47               | 171,98          | 13,54            | 8,59     | 0,20             | 0,11            | 0,07        | 0,06  | 0,05 | 365                           | 12.69 |
| B4    | 19,65                     | 26,59                     | 24,16         | 1,82               | 292,34          | 13,24            | 12,11    | 0,11             | 0,07            | 0,05        | 0,01  | 0,13 | 365                           | 22.09 |
| B5    | 21,47                     | 29,04                     | 29,16         | 2,00               | 544,95          | 14,59            | 18,73    | 0,20             | 0,16            | 0,10        | 0,01  | 0,16 | 365                           | 37.34 |
| B6    | 18,50                     | 25,10                     | 23,29         | 1,77               | 355,67          | 13,18            | 15,37    | 0,08             | 0,05            | 0,03        | 0,02  | 0,08 | 365                           | 26.95 |
| B7    | 23,27                     | 31,48                     | 28,04         | 1,88               | 474,66          | 14,90            | 17,01    | 0,12             | 0,08            | 0,01        | 0,02  | 0,05 | 365                           | 31.85 |
| B8    | 18,87                     | 25,54                     | 23,17         | 1,68               | 131,87          | 14,04            | 6,21     | 0,13             | 0,10            | 0,02        | 0,02  | 0,02 | 177                           | 9.45  |
| B9    | 19,05                     | 25,78                     | 20,69         | 1,37               | 338,39          | 15,04            | 16,40    | 0,03             | 0,02            | 0,02        | 0,00  | 0,00 | 365                           | 22.48 |
| B10   | 11,51                     | 15,58                     | 13,08         | 0,75               | 134,87          | 17,39            | 10,23    | 0,04             | 0,03            | 0,01        | 0,00  | 0,00 | 362                           | 7.72  |
| B11   | 12,16                     | 16,45                     | 8,65          | 0,49               | 108,10          | 17,52            | 12,38    | 0,02             | 0,01            | 0,00        | 0,00  | 0,00 | 365                           | 6.17  |
| B12   | 17,45                     | 23,60                     | 22,45         | 1,81               | 224,67          | 12,36            | 9,87     | 0,11             | 0,07            | 0,04        | 0,01  | 0,01 | 298                           | 18.12 |
| B13   | 16,25                     | 21,98                     | 19,37         | 1,37               | 245,29          | 14,24            | 12,68    | 0,08             | 0,06            | 0,01        | 0,01  | 0,07 | 365                           | 17.30 |
| B14   | 20,02                     | 27,09                     | 19,43         | 1,50               | 273,30          | 12,97            | 14,05    | 0,10             | 0,08            | 0,01        | 0,02  | 0,11 | 365                           | 21.05 |
| C1    | 22,60                     | 30,60                     | 24,33         | 1,41               | 321,42          | 17,29            | 13,22    | 0,17             | 0,08            | 0,03        | 0,07  | 0,06 | 365                           | 18.58 |
| C2    | 18,70                     | 25,30                     | 25,15         | 1,65               | 397,05          | 15,20            | 15,93    | 0,17             | 0,09            | 0,01        | 0,05  | 0,15 | 366                           | 26.12 |
| C3    | 20,40                     | 27,60                     | 21,77         | 1,29               | 208,62          | 16,87            | 9,52     | 0,10             | 0,09            | 0,01        | 0,02  | 0,03 | 291                           | 12.33 |
| C4    | 19,40                     | 26,30                     | 23,70         | 1,51               | 228,64          | 15,64            | 9,49     | 0,04             | 0,03            | 0,00        | 0,01  | 0,00 | 291                           | 14.58 |
| A1    | 19,50                     | 26,40                     | 24,92         | 1,83               | 290,61          | 13,60            | 11,39    | 0,03             | 0,02            | 0,01        | 0,00  | 0,00 | 366                           | 21.14 |
| A2    | 25,60                     | 42,10                     | 39,84         | 2,81               | 510,25          | 14,21            | 12,83    | 0,04             | 0,03            | 0,02        | 0,00  | 0,00 | 225                           | 35.94 |
| A3    | 33,50                     | 45,30                     | 40,54         | 2,85               | 607,06          | 14,22            | 15,06    | 0,04             | 0,02            | 0,02        | 0,00  | 0,00 | 366                           | 42.64 |
| A4    | 16,80                     | 22,70                     | 20,29         | 1,33               | 430,29          | 15,18            | 21,19    | 0,10             | 0,05            | 0,02        | 0,02  | 0,04 | 366                           | 28.30 |
| A5    | 12,30                     | 14,90                     | 13,33         | 0,97               | 165,18          | 13,85            | 12,34    | 0,15             | 0,10            | 0,08        | 0,04  | 0,00 | 366                           | 11.95 |
| A6    | 11,00                     | 14,20                     | 11,16         | 0,70               | 117,12          | 16,05            | 10,57    | 0,09             | 0,06            | 0,02        | 0,01  | 0,01 | 360                           | 7.31  |
| A7    | 8,90                      | 12,00                     | 9,29          | 0,54               | 91,18           | 17,36            | 9,67     | 0,09             | 0,06            | 0,02        | 0,01  | 0,00 | 363                           | 5.24  |
| A8    | 21,10                     | 28,50                     | 24,45         | 1,48               | 273,20          | 16,50            | 11,24    | 0,02             | 0,02            | 0,01        | 0,00  | 0,06 | 364                           | 16.54 |
| A9    | 15,10                     | 20,50                     | 20,57         | 1,49               | 198,98          | 13,89            | 9,51     | 0,14             | 0,12            | 0,03        | 0,04  | 0,00 | 315                           | 14.52 |
| Total |                           |                           | 22,41         | 1,53               | 294,59          | 14,97            | 12,93    | 0,11             | 0,07            | 0,03        | 0,02  | 0,05 | 12,475                        | 19.97 |

Optimal load refers to the established interval of optimal work load according to the Paoncil measurement (OPC per nurse).

Internal medicine/Pulmonary/Neurology units: D1, D2, D3, D9, B1, B2, B3, B4, B13, B14, C2, C3

Surgical/Ortopedic: D4, D5, D6, B5, B6, B7, B12 C1, C4, A4

Gynecology, childbirth units: D7, B8, B9, A1, A2, A3

Onkology units: D8, A8

Rehabilitation unit: A9

Pediatric units: B10, B11, A5, A6, A7

Table 2. Odds ratio for an adverse event (with 95% confidence interval) for four types of patient safety incidents and for patient mortality, according to nursing workload measurement by the RAFAELA system (OPC/nurse) and the standard nursing workload measurement system (patients/nurse), unadjusted and adjusted estimates

|                                       | Incident         | Patient affected | Harm to patient  | >1 incident      | Death            |
|---------------------------------------|------------------|------------------|------------------|------------------|------------------|
| OPC/nurse, unadjusted model           |                  |                  |                  |                  |                  |
| Below optimum                         | 0,67 (0.58-0.78) | 0,68 (0.56-0.82) | 0,66 (0.50-0.88) | 0,67 (0.47-0.95) | 0,55 (0.43-0.70) |
| At optimum                            | 1                | 1                | 1                | 1                | 1                |
| Above optimum                         | 1,28 (1.13-1.45) | 1,13 (0.96-1.32) | 1,16 (0.93-1.45) | 1,25 (0.95-1.66) | 1,42 (1.19-1.69) |
| -2 log likelihood                     | 8,577.5          | 6,169.3          | 3,523.0          | 2,406.9          | 4,958.6          |
| OPC/nurse, adjusted model type 1      |                  |                  |                  |                  |                  |
| Below optimum                         | 0,76 (0.65-0.90) | 0,76 (0.62-0.92) | 0,82 (0.61-1.10) | 0,71 (0.49-1.02) | 0,77 (0.60-1.00) |
| At optimum                            | 1                | 1                | 1                | 1                | 1                |
| Above optimum                         | 1,27 (1.11-1.45) | 1,11 (0.94-1.31) | 1,13 (0.90-1.43) | 1,35 (1.00-1.82) | 1,41 (1.16-1.70) |
| -2 log likelihood                     | 8,050.9          | 5,876.6          | 3,238.9          | 2,198.7          | 4,299.9          |
| OPC/nurse, adjusted model type 2      |                  |                  |                  |                  |                  |
| Below optimum                         | 0,79 (0.67-0.93) | 0,78 (0.64-0.96) | 0,85 (0.63-1.14) | 0,73 (0.50-1.07) | 0,78 (0.60-1.00) |
| At optimum                            | 1                | 1                | 1                | 1                | 1                |
| Above optimum                         | 1,24 (1.08-1.42) | 1,08 (0.91-1.28) | 1,11 (0.88-1.41) | 1,32 (0.98-1.79) | 1,43 (1.18-1.73) |
| -2 log likelihood                     | 8,010.8          | 5,856.3          | 3,211.1          | 2,187.9          | 4,286.5          |
| Patients/nurse, unadjusted            |                  |                  |                  |                  |                  |
| 1st group                             | 0,74 (0.64-0.86) | 0,85 (0.71-1.02) | 0,79 (0.61-1.04) | 0,80 (0.58-1.10) | 0,47 (0.38-0.58) |
| 2nd group                             | 1                | 1                | 1                | 1                | 1                |
| 3rd group                             | 1,09 (0.95-1.25) | 1,18 (0.99-1.41) | 1,24 (0.96-1.58) | 0,95 (0.70-1.30) | 0,97 (0.81-1.17) |
| -2 log likelihood                     | 8,589.2          | 6,180.9          | 3,525.1          | 2,416.5          | 4,958.8          |
| Patients/nurse, adjusted model type 1 |                  |                  |                  |                  |                  |
| 1st group                             | 0,85 (0.72-1.01) | 0,94 (0.77-1.16) | 0,88 (0.65-1.19) | 0,96 (0.67-1.37) | 0,85 (0.68-1.07) |
| 2nd group                             | 1                | 1                | 1                | 1                | 1                |
| 3rd group                             | 1,16 (0.99-1.37) | 1,17 (0.95-1.43) | 1,03 (0.77-1.38) | 1,18 (0.83-1.67) | 1,19 (0.96-1.48) |
| -2 log likelihood                     | 8,073.5          | 5,885.7          | 3,242.2          | 2,208.7          | 4,315.1          |
| Patients/nurse, adjusted model type 2 |                  |                  |                  |                  |                  |
| 1st group                             | 0,89 (0.75-1.05) | 0,98 (0.80-1.21) | 0,90 (0.66-1.23) | 1,01 (0.71-1.44) | 0,86 (0.68-1.08) |
| 2nd group                             | 1                | 1                | 1                | 1                | 1                |
| 3rd group                             | 1,13 (0.96-1.33) | 1,15 (0.94-1.41) | 1,03 (0.77-1.39) | 1,15 (0.81-1.64) | 1,20 (0.97-1.49) |
| -2 log likelihood                     | 8,029.8          | 5,863.1          | 3,213.4          | 2,196.1          | 4,301.8          |
| Number of events                      | 1,367            | 848              | 400              | 246              | 636              |

The table summarises results from 30 different models estimated on 12,475 calendar days, representing 36 wards at four hospital units.

Adjusted model type 1 refers to models adjusted for ward-specific effects.

Adjusted model type 2 refers to models adjusted for ward-specific effects and effects of weekday, holiday and season.

Estimates for ward-specific effects and effects of weekday, holiday and season are not displayed here.

Patients/nurse refers to a categorisation into three equal groups.

1  
2  
3  
4  
5  
6  
7  
8  
9  
10  
11  
12  
13  
14  
15  
16  
17  
18  
19  
20  
21  
22  
23  
24  
25  
26  
27  
28  
29  
30  
31  
32  
33  
34  
35  
36  
37  
38  
39  
40  
41  
42  
43  
44  
45  
46  
47  
48  
49  
50  
51  
52  
53  
54  
55  
56  
57  
58  
59  
60

Categories used for weekday are Monday, Tuesday, Wednesday, Thursday, Friday, Saturday, and Sunday.  
Categories used for holiday are No or Yes, where Yes refers to Easter, Midsummer, Christmas and New Year.  
Categories used for season are January-March, April-May, June-August, September-October, and November-December.

For peer review only

STROBE Statement—checklist of items that should be included in reports of observational studies

|                              | Item No | Recommendation                                                                                                                                                                                                                |
|------------------------------|---------|-------------------------------------------------------------------------------------------------------------------------------------------------------------------------------------------------------------------------------|
| <b>Title and abstract</b>    | 1       | (a) Indicate the study's design with a commonly used term in the title or the abstract<br>(b) Provide in the abstract an informative and balanced summary of what was done and what was found<br><a href="#">Page 2 and 3</a> |
| <b>Introduction</b>          |         |                                                                                                                                                                                                                               |
| Background/rationale         | 2       | Explain the scientific background and rationale for the investigation etc. <a href="#">Page 3-4</a>                                                                                                                           |
| Objectives                   | 3       | State specific objectives, including any prespecified hypotheses. <a href="#">Page 4</a>                                                                                                                                      |
| <b>Methods</b>               |         |                                                                                                                                                                                                                               |
| Study design                 | 4       | Present key elements of study design early in the paper, <a href="#">page 4</a>                                                                                                                                               |
| Setting                      | 5       | Describe the setting, locations, and relevant dates, including periods of recruitment, exposure, follow-up, and data collection, <a href="#">page 4-5</a>                                                                     |
| Participants                 | 6       | <a href="#">Page 5</a>                                                                                                                                                                                                        |
| Variables                    | 7       | Clearly define all outcomes, exposures, predictors, potential confounders, and effect modifiers. Give diagnostic criteria, if applicable, <a href="#">page 6</a>                                                              |
| Data sources/<br>measurement | 8*      | For each variable of interest, give sources of data and details of methods of assessment (measurement). Describe comparability of assessment methods if there is more than one group, <a href="#">page 6-7</a>                |
| Bias                         | 9       | Describe any efforts to address potential sources of bias, <a href="#">page 6-7</a>                                                                                                                                           |
| Study size                   | 10      | Explain how the study size was arrived at, <a href="#">page 6-7</a>                                                                                                                                                           |
| Quantitative variables       | 11      | Explain how quantitative variables were handled in the analyses. If applicable, describe which groupings were chosen and why, <a href="#">page 6-7</a>                                                                        |
| Statistical methods          | 12      | <a href="#">Page 6-7</a>                                                                                                                                                                                                      |

Continued on next page

| <b>Results</b>           |     |                                                                                                                                                                                                                                                                                                                                                                                                                            |
|--------------------------|-----|----------------------------------------------------------------------------------------------------------------------------------------------------------------------------------------------------------------------------------------------------------------------------------------------------------------------------------------------------------------------------------------------------------------------------|
| Participants             | 13* | (a) Report numbers of individuals at each stage of study—eg numbers potentially eligible, examined for eligibility, confirmed eligible, included in the study, completing follow-up, and analysed<br>(b) Give reasons for non-participation at each stage<br>(c) Consider use of a flow diagram                                                                                                                            |
| Descriptive data         | 14* | (a) Give characteristics of study participants (eg demographic, clinical, social) and information on exposures and potential confounders<br>(b) Indicate number of participants with missing data for each variable of interest <b>p 7-9 table 1</b><br>(c) <i>Cohort study</i> —Summarise follow-up time (eg, average and total amount)                                                                                   |
| Outcome data             | 15* | <i>Cohort study</i> —Report numbers of outcome events or summary measures over time<br><i>Case-control study</i> —Report numbers in each exposure category, or summary measures of exposure<br><i>Cross-sectional study</i> —Report numbers of outcome events or summary measures <b>p 7-9, table 1-2</b>                                                                                                                  |
| Main results             | 16  | (a) Give unadjusted estimates and, if applicable, confounder-adjusted estimates and their precision (eg, 95% confidence interval). Make clear which confounders were adjusted for and why they were included <b>p 7-9</b><br>(b) Report category boundaries when continuous variables were categorized<br>(c) If relevant, consider translating estimates of relative risk into absolute risk for a meaningful time period |
| Other analyses           | 17  | Report other analyses done—eg analyses of subgroups and interactions, and sensitivity analyses                                                                                                                                                                                                                                                                                                                             |
| <b>Discussion</b>        |     |                                                                                                                                                                                                                                                                                                                                                                                                                            |
| Key results              | 18  | Summarise key results with reference to study objectives <b>p 9-10</b>                                                                                                                                                                                                                                                                                                                                                     |
| Limitations              | 19  | Discuss limitations of the study, taking into account sources of potential bias or imprecision. Discuss both direction and magnitude of any potential bias, <b>p 11</b>                                                                                                                                                                                                                                                    |
| Interpretation           | 20  | Give a cautious overall interpretation of results considering objectives, limitations, multiplicity of analyses, results from similar studies, and other relevant evidence <b>p11-12</b>                                                                                                                                                                                                                                   |
| Generalisability         | 21  | Discuss the generalisability (external validity) of the study results <b>p11-12</b>                                                                                                                                                                                                                                                                                                                                        |
| <b>Other information</b> |     |                                                                                                                                                                                                                                                                                                                                                                                                                            |
| Funding                  | 22  | Give the source of funding and the role of the funders for the present study and, if applicable, for the original study on which the present article is based <b>p 12</b>                                                                                                                                                                                                                                                  |

\*Give information separately for cases and controls in case-control studies and, if applicable, for exposed and unexposed groups in cohort and cross-sectional studies.

**Note:** An Explanation and Elaboration article discusses each checklist item and gives methodological background and published examples of transparent reporting. The STROBE checklist is best used in conjunction with this article (freely available on the Web sites of PLoS Medicine at <http://www.plosmedicine.org/>, Annals of Internal Medicine at <http://www.annals.org/>, and Epidemiology at <http://www.epidem.com/>). Information on the STROBE Initiative is available at [www.strobe-statement.org](http://www.strobe-statement.org).



# BMJ Open

## OPTIMAL NURSING WORKLOAD, PATIENT SAFETY INCIDENTS AND MORTALITY – AN OBSERVATIONAL STUDY FROM FINLAND

|                                 |                                                                                                                                                                                                                                           |
|---------------------------------|-------------------------------------------------------------------------------------------------------------------------------------------------------------------------------------------------------------------------------------------|
| Journal:                        | <i>BMJ Open</i>                                                                                                                                                                                                                           |
| Manuscript ID                   | bmjopen-2017-016367.R2                                                                                                                                                                                                                    |
| Article Type:                   | Research                                                                                                                                                                                                                                  |
| Date Submitted by the Author:   | 26-Oct-2017                                                                                                                                                                                                                               |
| Complete List of Authors:       | Fagerström, Lisbeth; Åbo Akademi University, Faculty of Education and Welfare; University College of Southeast Norway, Kinnunen, Marina; Vaasa Central Hospital<br>Saarela, Jan; Åbo Akademi University, Faculty of Education and Welfare |
| <b>Primary Subject Heading</b>: | Nursing                                                                                                                                                                                                                                   |
| Secondary Subject Heading:      | Health services research                                                                                                                                                                                                                  |
| Keywords:                       | Health & safety < HEALTH SERVICES ADMINISTRATION & MANAGEMENT, Human resource management < HEALTH SERVICES ADMINISTRATION & MANAGEMENT, Risk management < HEALTH SERVICES ADMINISTRATION & MANAGEMENT                                     |
|                                 |                                                                                                                                                                                                                                           |

SCHOLARONE™  
Manuscripts

Only

1  
2  
3 **OPTIMAL NURSING WORKLOAD, PATIENT SAFETY INCIDENTS AND**  
4 **MORTALITY – AN OBSERVATIONAL STUDY FROM FINLAND**  
5  
6  
7

8 **Authors:**

9 Professor Lisbeth Fagerström, PhD,

10 Åbo Akademi University, Faculty of Education and Welfare Studies, Vaasa, Finland;

11  
12  
13 University College of Southeast Norway, Faculty of Health and Social Sciences, Drammen,  
14 Norway  
15

16  
17  
18  
19  
20 Chief Director of Nursing Marina Kinnunen, PhD

21  
22 Vaasa Central Hospital, Vaasa, Finland  
23  
24  
25

26  
27 Professor Jan Saarela, PhD,

28  
29 Åbo Akademi University, Faculty of Education and Welfare Studies, Vaasa, Finland;

30  
31 University of Helsinki, Swedish School of Social Science, Helsinki, Finland  
32  
33  
34

35 **Corresponding Author:**

36  
37 Professor Lisbeth Fagerström, Faculty of Education and Welfare Studies, Åbo Akademi

38 University, Strandgatan 2, 65101 Vaasa, Finland. Mobile: +358414331097; +4745503873,

39 phone number: +358 2 21531, email: [lisbeth.fagerstrom@abo.fi](mailto:lisbeth.fagerstrom@abo.fi); [lisbeth.fagerstrom@usn.no](mailto:lisbeth.fagerstrom@usn.no)  
40  
41  
42

43 Key words: nurse staffing, outcomes, patient safety, mortality, human resources  
44  
45

46 Word count: 3 502 words.  
47  
48  
49  
50  
51  
52  
53  
54  
55  
56  
57  
58  
59  
60

## Abstract

**Objective** To investigate whether the recommended daily workload per nurse (OPC/nurse) as measured by the RAFAELA system correlates with different types of patient safety incidents and with patient mortality, and to compare this interrelation with that based on the standard patients-to-nurse classification.

**Setting** We obtained data from 36 units from four Finnish hospitals. One was a tertiary acute care hospital, and the three others were secondary acute care hospitals.

**Participants** Patients' nursing intensity (249,123 classifications), nursing resources, patient safety incidents and patient mortality were collected on the daily basis during one year, corresponding to 12,475 data points. Associations between work intensity per nurse and patient safety incidents or mortality were estimated using logistic regression models. Regressions were estimated without any control variables and by adjusting for ward-specific effects, and effects of day of the week, holiday and season.

**Primary and secondary outcome measures** Main outcome measures were patient safety incidents and death of a patient.

**Results** When the daily workload per nurse was above the assumed optimum, the adjusted odds for a patient safety incident were 1.24 (95% CI: 1.08-1.42) that if it was at this level, and 0.79 (95% CI: 0.67-0.93) when it was below the assumed optimum. Corresponding estimates for odds ratios of patient mortality were 0.78 (95% CI: 0.60-1.00) and 1.43 (95% CI: 1.18-1.73), respectively. Models estimated on basis of the RAFAELA classification system generally provided larger effect sizes, greater statistical power, and better model fit than those based on the standard patients-to-nurse classification, although the difference was not very large. Net benefits as calculated on basis of decision analysis did not provide any clear evidence on which measure to prefer.

**Conclusions** We have demonstrated an association between daily workload per nurse and patient safety incidents and mortality. Current findings ought to be replicated in studies.

### Strengths and limitations of this study

- The study is the first to assess the relationship between nursing workload and patient outcomes based on data obtained on a daily basis
- The study provides some evidence to suggest that the traditional nurse staffing measure, the patients-to-nurse ratio, may fail to control for patient severity and case mix
- The instrument used here takes patient characteristics, such as age, sex and diagnoses, into account
- The study did not address the potential influence of skill-mix, competence level, work experience, or the professionals' patient-related direct time

### Introduction

Many studies have shown that insufficient nurse staffing in hospital-based care negatively affects outcomes such as mortality, infections, and failure to rescue (1-6). However, the results are inconsistent and indicate a complex and non-linear relationship between nursing workload (NWL), mortality, and other patient outcomes (7-12). The strength of the evidence underpinning the association between nurse staffing and outcomes in previous studies can be challenged. Poor research designs, measurement problems, and/or imprecise data that do not take into account daily variations in patients' care needs, may contribute to the mixed findings (8). Higher nurse staffing and richer skill mix are associated with improved patient outcomes (4,8,10). Therefore, higher ratios have been recommended for improving patient safety and outcomes (1,9). However, it is difficult to set fixed, standard patient-to-nurse ratios for units in acute care hospitals, as evidenced in systematic reviews and other studies (7,10,13-15). Staffing levels must instead match patients' nursing care needs (8,16,17).

The RAFAELA system is a patient classification system developed in the 1990s in Finland (16, 18-19). It differs from most patient classification systems in that daily data on patients' care needs and the workload per nurse are used, instead of the fixed patient-to-nurse ratios common to other instruments. The main purpose of the RAFAELA system is to ensure an optimal nursing workload (NWL) by appropriate allocation of nurse staff resources. An assumed optimal NWL is defined as when patients' care needs are in balance with the nursing resources and working conditions that are favorable, or most desirable or satisfactory, for the realization of good nursing care (1-22). While certain realities such as economic restraints cannot be entirely disregarded, the use of RAFAELA

1  
2  
3 provides a measurement whereby an optimum situation can be assessed and achieved, with resources  
4 properly dedicated to the reduction or elimination of adverse events.  
5

6 In the RAFAELA system, NWL is based on daily assessments of patients' care needs and the  
7 registration of the nursing staff resources. The Professional Assessment of Optimal Nursing Care  
8 Intensity Level (PAONCIL) method is used to establish an assumed optimal NWL for a specific ward  
9 and daily measurements of NWL are subsequently compared to this optimal level. Resources are  
10 considered to be appropriately allocated when the actual NWL is found to be at the optimal level.  
11  
12 Appropriate allocation is considered to be a satisfactory number of nurses, neither too many nor too  
13 few, being allocated to provide care for the actual patient group.  
14  
15

16  
17 We have found only two studies on the relationship between the recommended optimal NWL  
18 and patient outcomes. Needleman et al (8) found a significant association between patient  
19 mortality and increased exposure to unit shifts when nurse staffing was below the target level.  
20  
21 In a recent study by Junttila et al (18), based on monthly means, the incidence rate of death  
22 when average daily NWL was above the assumed optimal level was 13-fold than when the  
23 average daily NWL was below this level. However, to our knowledge, no studies exist on this  
24 relationship using daily-level data. The aim of this observational study was therefore to  
25 investigate whether the assumed optimal NWL, as a measure based on the RAFAELA  
26 system, correlates with patient safety incidents and patient mortality, using data collected on a  
27 daily basis. Also, we want to compare the estimates with those based on the standard patients-  
28 to-nurse ratio.  
29  
30  
31  
32  
33  
34  
35

## 36 **METHODS**

### 37 **Study setting**

38  
39  
40 We obtained data from 36 units from four Finnish hospitals. One (A, 9 units) is a tertiary  
41 acute care hospital, whereas the three others (B, 14 units; C, 4 units; D, 9 units) are secondary  
42 acute care hospitals. Inclusion criteria were daily use of the RAFAELA system according to  
43 standards, reliable nursing intensity data as expressed in terms of a yearly reliability test done  
44 by parallel classifications (requirement is that unanimity is over 70 per cent), and applicable  
45 nursing intensity level measured with the PAONCIL method (16,19-21). Units that had  
46 undergone major organizational changes over the previous year were excluded. The A and B  
47 data represent the period January 1 to December 31, 2012, and the C and D data represent the  
48 period January 1 to December 31, 2013.  
49  
50  
51  
52  
53  
54  
55  
56  
57  
58  
59  
60

1  
2  
3 This study received approval from the chief administrative physicians of all four hospitals  
4 involved, and because of that no further ethical approval was necessary. This in accordance  
5 with the regulatory regime for conducting health research in Finland. We did not include any  
6 sensitive health-related data of patients in the study, or any information regarding  
7 characteristics of the nurses. The RAFAELA is owned by the Association of Finnish Local  
8 and Regional Association Authorities and governed by non-commercial Finnish Consulting  
9 Group Ltd.  
10  
11  
12  
13  
14

### 15 **Measurement of NWL in the RAFAELA nursing intensity and staffing system**

16  
17

18 The RAFAELA is a standardized, person-centered, evidence-based system for nurse staffing  
19 that was developed in the 1990s (16, 19). The feasibility, validity, and reliability of the  
20 RAFAELA have been tested with good results (16, 18, 21, 22). It is now used in about 90 per  
21 cent of the hospitals in Finland, and has lately been implemented in Iceland, the Netherlands,  
22 Sweden, and Norway (22). A requirement for users of the RAFAELA system is that the  
23 interrater reliability for nursing intensity measurements should be tested yearly.  
24  
25  
26  
27  
28

29 The daily nursing intensity of each unit is assessed by all the responsible registered nurses on  
30 each day. One registered nurse usually classify 1 to 6 patients per day. The assessment is done  
31 by classifying the patient's care needs by the Oulu Patient Classification Q (OPC) instrument.  
32 This instrument consists of six sub-areas of nursing care. The nursing intensity level varies  
33 from 6 to 24 points for an individual patient per calendar day (16, 19). The nurses' workload  
34 is calculated by dividing the total amount of nursing intensity points on the unit, e.g. 350, with  
35 the number of nurses who take care of patients, e.g. 12, during the same 24 hours. In this  
36 example, the patient-related NWL will then be 29.2 OPC points per nurse (hereafter referred  
37 to as OPC/nurse).  
38  
39  
40  
41  
42  
43  
44

45 The underlying assumption of the RAFAELA system is that the nature and characteristics of  
46 nursing care differ between wards and therefore the recommended optimal NWL of each ward  
47 has to be determined by the PAONCIL method. The development, testing and description of  
48 this method has been reported in several publications (16,19-22). Thus the method is used to  
49 assess each ward's recommended optimal NWL including various contextual and  
50 organizational factors (21). The recommendation is that the optimal NWL has to be  
51 reassessed by conducting the PAONCIL study every second year. The optimal levels used in  
52  
53  
54  
55  
56  
57  
58  
59  
60

1  
2  
3 this study were not older than 2-3 years. The basic idea of the RAFAELA system is that the  
4 observed NWL (e.g. 29.2 points/nurse) is to be compared with the established and  
5 recommended optimal level for the same unit (e.g. 22-30 points/nurse). If the observed NWL  
6 lies within the established limits, the nursing intensity can be considered to be at the assumed  
7 optimal level.  
8  
9

10  
11  
12 The data we use in this paper consist of daily measurements based on the RAFAELA system  
13 (19). They correspond to every admitted patient's nursing intensity during one year, and were  
14 based on 249,123 classifications of patients' nursing intensity (OPC classifications). Each  
15 day, the patient-related nurse resources were also recorded, using a standardized model where  
16 non-patient related time was excluded. Apart from each day's staff data (OPC/patient,  
17 OPC/nurse, etc.), there was daily information also on patient incidents and patient mortality.  
18  
19

20  
21  
22 All data were collected during a period of one year, meaning that there were 12,475 data  
23 points (not approximately 13,140, since some wards were closed for shorter periods, foremost  
24 because of holidays). Table 1 provides the central variables of the data in terms of each unit's  
25 optimal workload (the PAONCIL level), daily mean number of classified patients, daily mean  
26 number of OPC classifications, total OPC points, nursing staff resources, number of patients  
27 per nurse, OPC points per nurse, incidents, and deaths (see Table 1).  
28  
29  
30  
31

32  
33  
34 (Insert Table 1 here)  
35

## 36 **Outcomes**

37  
38  
39 Data on incidents were collected daily from The Reporting System for Safety Incidents in  
40 Health Care Organizations (HaiPro), which is a comprehensive and standardized patient  
41 safety system in Finland (23, 24). As defined by HaiPro, an incident is a safety hazard that  
42 may harm or harm the patient. Incidents are classified into 14 categories (24), but there are  
43 two main categories: near miss, which may have caused harm to the patient, but was  
44 prevented by chance or by timely preventive actions, and adverse events, which are negative  
45 events that caused harm to the patient. Here, we categorise incidents in four ways: (1) whether  
46 at least one incident, of any type, occurred (Incident), (2) whether a patient was affected to  
47 any degree (Patient affected), (3) whether the incident caused harm to the patient (Harm to  
48 patient), and (4) whether there was more than one incident, of any type, on the same day (>1  
49 incident), within the available follow-up of 365 days. In addition, we use patient mortality  
50  
51  
52  
53  
54  
55  
56  
57  
58  
59  
60

(Death) as a fifth type of adverse event. The mortality data were retrieved from the local mortality register of each hospital.

### Statistical analyses

Using logistic regression analyses, associations were estimated on the daily level between nursing intensity per nurse in relation to the assumed optimal level and each type of outcome, i.e., each of the four types of incidents. Models were estimated without any control variables and by adjusting for ward-specific effects and effects of day of the week, holiday and season. Odds ratios were hence calculated by using dummy variables for each ward, each day of the week, whether the day studied was a holiday, and time of the year. The categories of the variables are described in the footnotes of Table 2 (see Table 2). By using dummy variables for each ward, we allow for heterogeneity in the intercept term, which is motivated by the fact that across-ward variability is fairly modest. Supplementary electronic files provide full details of the models estimated. Parallel analyses were performed with the standard measure of nursing workload, patients/nurse (see Supplementary file 1, Supplementary file 2, Supplementary file 3).

In the next section, we report results in which evaluations based on the RAFAELA system were assessed using the assumed optimal level with a  $\pm 15\%$  deviation around this point (16, 19, 21), and in which the patients-to-nurse ratio was assessed using a categorization with three equally large groups. The results reported (see Table 2), were consequently based on 20 different regressions. Model fit indices (-2 log likelihood, Akaike information criterion, and Nagelkerke R Square) are provided to facilitate comparisons between regressions based on the RAFAELA system's OPC/nurse measure and the standard patients/nurse measure. The analyses were performed using SPSS 21. All estimates are expressed in terms of odds ratios with 95% confidence intervals.

Apart from comparing the predictive accuracy of the models that utilize the OPC/nurse measure and the patients/nurse measure, respectively, we have also used decision-analytic methods (25). These ascertain the value of prediction models by incorporating information on consequences and they require explicit valuation of outcomes. The technique may thus help in deciding on which measure to prefer, that is, the one with a higher net benefit.

## RESULTS



1  
2  
3 Unadjusted odds ratios for the associations between nursing workload and different types of  
4 patient incidents are reported in the first (upper) panel of Table 2 (see Table 2). When nurses'  
5 daily workload according to the RAFAELA system (OPC/nurse) was above the recommended  
6 optimal level, the odds ratio of an incident was 1.28 (95% CI: 1.13-1.45) that if the workload  
7 was at the recommended optimum. Corresponding odds ratios for the other types of incidents,  
8 patient affected, harm to patient, and >1 incident, were 1.13, 1.16, and 1.25, respectively.  
9 Odds ratios for patient mortality was even higher, or 1.42 (95% CI: 1.19-1.69). If OPC/nurse  
10 was below the recommended optimum, the odds ratio for incidents and patient mortality were,  
11 conversely lower, or around 0.67 for the different types of incidents, and 0.55 for patient  
12 mortality.  
13  
14  
15  
16  
17  
18  
19

20 (Insert Table 2 here)  
21  
22

23 When ward-specific effects and effects of day of the week, holiday and season were adjusted  
24 for (the second panel) the odds ratios diminished somewhat. Nursing workload above the  
25 assumed recommended optimum was associated with 8-34 per cent higher odds of an  
26 incident, depending on the type of incident, and 43 per cent higher odds of patient mortality,  
27 as compared to if it was at the assumed recommended optimum. If OPC/nurse was below this  
28 level, the odds ratio for an incident and for patient mortality was approximately 25 per cent  
29 lower. Adding the ward-specific effects improved model fit considerably. Also the variables  
30 for weekday, holiday, and season improved the model fit, except for the outcomes >1 incident  
31 and death. The odds for incidents were in general least likely to occur on Saturdays and on  
32 holidays, whereas there were no obvious seasonal effects (not shown here). Complete  
33 descriptions of all estimates and the models estimated, with predictive indices, are found in  
34 the supplementary electronic files (Supplementary file 1, Supplementary file 2,  
35 Supplementary file 3).  
36  
37  
38  
39  
40  
41  
42  
43  
44

45 The two lower panels provide results of parallel analyses when nursing workload was  
46 measured according to the standard patients-to-nurse ratio (patients/nurse). As compared with  
47 results based on the RAFAELA system, there are three main issues to be pointed out. First,  
48 effects sizes in terms of odds ratios were consistently smaller with the patients/nurse approach  
49 than with the OPC/nurse approach, no matter if unadjusted or adjusted models were being  
50 compared. For instance, in the fully adjusted model, the odds ratio of an incident was 1.13 if  
51 workload was in the highest one-third, and 0.89 if it was in the lowest one-third, as compared  
52 to if it was in the middle one-third. These effects were notably smaller than the estimated  
53  
54  
55  
56  
57  
58  
59  
60

1  
2  
3 relative effect sizes for being above and below the recommended optimum according to the  
4 RAFAELA system, which were 1.24 and 0.79, respectively. Second, in almost all instances,  
5 the estimates of the patients/nurse approach had smaller statistical power in terms of wider  
6 confidence intervals (i.e., larger standard errors). For the same outcome and adjusted model as  
7 discussed above, for instance, estimates based on the patients/nurse approach were not  
8 statistically significant at the five per cent level, while those based on the OPC/nurse were.  
9 Third, when comparing results for the patients/nurse measure to the OPC/nurse measure for  
10 otherwise similar models and outcomes, the model fit of the former was consistently poorer  
11 (values of the log likelihood and AIC were higher and R square lower). Yet it needs to be  
12 stressed that the difference was not very large.  
13  
14  
15  
16  
17  
18  
19

20 We experimented also with other ways to categorize nursing workload. For OPC/nurse, we  
21 used an alternative with a halved deviation from the recommended optimal point, i.e.,  $\pm 7.5\%$   
22 instead of  $\pm 15\%$ , and with a doubled deviation, i.e.,  $\pm 30\%$  from the optimal point. The  
23 patient-to-nurse measurement was also assessed using alternative categorizations, such as five  
24 and seven equally large groups, respectively. Results of these additional regressions supported  
25 the overall conclusions as reported above. In models using the patients/nurse measure,  
26 associations were mostly weaker, came with lower statistical power, and they were less  
27 systematic, as compared to models based on the OPC/nurse measure (see Supplementary file  
28 1, Supplementary file 2, Supplementary file 3).  
29  
30  
31  
32  
33  
34  
35

36 Hence, our analyses of the data suggest that, in terms of predictive accuracy, models  
37 estimated on basis of nursing workload according to the RAFAELA system are slightly to be  
38 preferred above otherwise similar models that use the standard patients/nurse measure. It is  
39 not evident, however, which measure is to be preferred when it comes to decision making.  
40 Figure 1 summarizes net benefit values calculated based on the models estimated for each  
41 type of patient safety incident and patient mortality, respectively; see (25) for technical details  
42 (see Figure 1). The values have been calculated over a reasonable range for the probability of  
43 an event (type of incident or mortality). Models based on the OPC/nurse measure and the  
44 patients/nurse measure are to be compared by looking at the net benefit values (see Figure 1,  
45 Figure 2, Figure 3, Figure 4, Figure 5). The one with higher such values is to be preferred  
46 above the other. As can be seen, there is no clear discrepancy. For some threshold  
47 probabilities, the OPC/nurse measure lies above the patients/nurse measure, while for others,  
48 the situation is the opposite. For each event, the two curves are essentially overlapping, and in  
49  
50  
51  
52  
53  
54  
55  
56  
57  
58  
59  
60

1  
2  
3 most instances the difference in net benefit values is rather modest. In terms of the magnitude  
4 of the benefit for patients, it is not consequently evident which measure of nursing workload  
5 is to be preferred.  
6

7  
8 (Insert Figure 1 here)  
9

10 (Insert Figure 2 here)  
11

12 (Insert Figure 3 here)  
13

14 (Insert Figure 4 here)  
15

16 (Insert Figure 5 here)  
17  
18  
19  
20

## 21 **DISCUSSION**

22  
23 Using daily level data from 36 wards at four Finnish hospitals, we found that the odds for a  
24 patient safety incident was 10-30 per cent higher, and the odds for patient mortality about 40  
25 per cent higher, if the nursing workload as measured by the RAFAELA system (OPC/nurse)  
26 was above the assumed recommended optimum, as compared to if it was at this level. If the  
27 OPC per nurse was below the assumed optimum, the odds for a patient safety incident and  
28 mortality was approximately 25 per cent lower. A work situation below the recommended  
29 optimum means that the nurses have more time for caring and observing each patient, which  
30 may reduce the risk for adverse events and accordingly prevent the patient's health condition  
31 from deteriorating.  
32  
33  
34  
35  
36  
37  
38

39  
40 Previous research, by Donaldson et al. (9), did not find significant changes in patient safety  
41 associated with decreased NWL and could not confirm compliance with ratios per shift. Other  
42 studies used hospital-level administrative data that imprecisely allocated staffing to patients'  
43 care needs (8, 11). We think that such associations between nurse staffing, patient outcomes  
44 and mortality may be challenged (12, 18). Needleman et al. (8) found similar results between  
45 mortality and day-to-day, shift-to-shift variation in staffing, and Junttila et al. (18) between  
46 mortality and days with NWL over optimal level on a monthly level. The OPC-to-nurse  
47 calculation is more detailed than the traditional patient-to-nurse ratio. While comparable to  
48 the 'hours per patient day model', (26), its accuracy of nursing resources is higher. For  
49 example, if a nurse becomes sick during a shift and leaves the unit, the nurse in charge will  
50 deduct these hours from the unit's resources.  
51  
52  
53  
54  
55  
56  
57  
58  
59  
60

1  
2  
3  
4 Several factors affect the reporting of incidents, e.g., staff's lack of motivation or knowledge,  
5 nurse staff shortage, stressful situations, or burn out. A reasonable argument is therefore that a  
6 very high NWL indicates a working situation where the nurse staff resources are too low.  
7  
8 Still, too few resources can result in the deprioritization of the registration of adverse events  
9 and thus the underreporting of incidents connected to high NWL, which may affect the results  
10 of our study and the conclusions that we draw.  
11  
12  
13  
14  
15

16 Our study provided results based on daily measures of all-in-hospital patients' actual nursing  
17 intensity, including detailed registration of used staff resources and the association with  
18 incidents and mortality on daily levels. The HaiPro database, upon which our analyses were  
19 based, meets WHO criteria for a good reporting system (23, 24). However, we cannot  
20 guarantee that no reports are missing. Another alternative method to analyze patient safety is  
21 Global Trigger Tool (GTT) that has been recommended by for example, Classen et al. (27).  
22 However, it collects triggers and patient safety incidents from treatment periods, not on daily  
23 basis, whereas data on incidents collected from HaiPro can be targeted to certain days (24).  
24  
25 Units that underwent major organizational changes over the previous year were excluded  
26 from our study because this may negatively influence the data quality, and we preferred to  
27 have a smaller data set that was considered trustworthy. The accuracy of the data used, in  
28 terms of NWL, incidents, and mortality, is highly reliable and probably better than in earlier  
29 studies on NWL and adverse outcomes. The staffing measurement determined by the  
30 RAFAELA system implicitly considers specific characteristics of each ward, such as  
31 organizational factors in terms of unit size, leadership, and physical environment (16,19,21).  
32  
33  
34  
35  
36  
37  
38  
39  
40  
41

42 We found evidence that a staffing measure based on daily measurement of individual patient  
43 care needs and the assumed optimal NWL is slightly better in predicting incidents and  
44 mortality rates as compared the standard patient-to-nurse measure. Yet it needs to be stressed  
45 that, based on decision curve analysis, it was not clear which measure of nursing work load  
46 will produce higher net benefit in terms of avoiding patient safety incidents and patient  
47 mortality. Current findings therefore ought to be further investigated and the study replicated  
48 in larger, longitudinal multicenter studies.  
49  
50  
51  
52  
53

54 A strength of this study is that the analyses were conducted based upon nurses' independent  
55 classifications of patients' nursing intensity. The data used was based on a scientifically tested  
56  
57  
58  
59

1  
2  
3  
4  
5  
6  
7  
8  
9  
10  
11  
12  
13  
14  
15  
16  
17  
18  
19  
20  
21  
22  
23  
24  
25  
26  
27  
28  
29  
30  
31  
32  
33  
34  
35  
36  
37  
38  
39  
40  
41  
42  
43  
44  
45  
46  
47  
48  
49  
50  
51  
52  
53  
54  
55  
56  
57  
58  
59  
60

NWL system, which enabled comparisons (16), since the patient-case mix and patient severity groups require different staff resources to maximize positive patient outcomes (4, 8, 18, 28, 29). NWL consequently ought to be monitored daily using reliable instruments to ensure good patient outcomes. Such optimal resource allocation is needed for successful leadership and clinical governance, and it is crucial for favorable outcomes, to preventing adverse events and to reducing patient mortality.

Our study nevertheless has certain limitations. Although we could control for ward-specific effects and effects of day of the week, holiday and season, there might be other confounding factors. Hospital settings are characterized by complexity regarding factors that may affect total NWL (1, 2, 13, 28-31). While a list of central organizational and contextual factors were included in the PAONCIL instrument, we did not address the effects of skill-mix, competence level or work experience on patient outcomes. Physicians' patient-related direct time and health care support should also probably be included in further studies (32). Further analyses of other patient characteristics, such as age, sex or diagnoses, were not conducted because the OPC instrument takes these variables into account. Earlier studies have shown that the OPC instrument identifies patients' individual characteristics such as functional ability, symptoms of diseases, and the effect on nursing intensity of the most central patient characteristics (16, 22). Hence, the measurement by the OPC covers the actual patient case mix for each day. However, the contribution of these aspects, especially age and sex, may be analyzed in more detail in further studies. Another limitation was that a death caused by low staffing on a ward on one day may not always occur of the same day or ward. This could be explored by analyzing patient records the day before and after such death. Although this study was the first about the relationship between the recommended optimal NWL and daily outcomes, a multi-center study with several hospitals is needed to further test the generalizability of the results. One

## Conclusions

This study has showed that a work situation above the assumed recommended optimal level increases the risk for adverse events and patient mortality. However, the resources for nursing staff are limited in all organizations. Nurse managers therefore have to use available resources in the most optimal way. By using the recommended optimal NWL as a tool and standard for allocation of nursing staff, the nurse managers can optimize the staff resources. This study provided some new evidence to suggest that the traditional nurse staffing method, the patient-

1  
2  
3 to-nurse ratio, is not necessarily preferable when it comes to controlling for patients' severity  
4 and case mix. The staffing measure based on the recommended optimal NWL may therefore  
5 be considered a novel attempt to fill a gap in the existing knowledge on leadership and  
6 clinical governance. Efficient resource allocation is needed for successful leadership and  
7 clinical governance and it is crucial for favorable outcomes, for preventing adverse events and  
8 for reducing the mortality risk. Future research is needed to ascertain whether good patient  
9 outcomes are ensured by daily monitoring of nurses' workload with instruments like the one  
10 studied here.  
11  
12  
13  
14  
15

16  
17  
18  
19 **Contributors** LF did the literature search. LF and JS designed the study. LF collected the  
20 data. JS prepared the data and performed the analyses. LF, MK and JS contributed to data  
21 interpretation, writing, and revision of the report.  
22  
23

24 **Funding** The authors disclosed receipt of the following financial support for the research and  
25 authorship for this article: The State Research Funding of Vaasa Hospital District based on  
26 the Health Care Act (1326/2010).  
27  
28  
29

30 **Competing interest** The authors declared no potential conflicts of interest with respect to the  
31 research, authorship, and/or publication of this article. However, we want to declare that the  
32 first author has been involved in developing the RAFAELA system.  
33  
34

35 **Data Sharing** Full descriptions of all models estimated and their estimates are found in the  
36 supplementary electronic files.  
37  
38  
39

## 40 **References**

- 41 1 Aiken LH, Clarke SP, Sloane DM, et al. Hospital nurse staffing and patient mortality,  
42 nurse burnout, and job dissatisfaction. *JAMA* 2002;288:1987-93.
- 43 2 Aiken LH, Cimiotti JO, Sloane DM. Effects of nurse staffing and nurse education on  
44 patient deaths in hospitals with different nurse work environments. *Med Care*  
45 2011;49:1047-53.
- 46 3 Aiken LH, Sloane DM, Bruyneel L, et al. Nurse staffing and education and hospital  
47 mortality in nine European countries: a retrospective observational study. *Lancet*  
48 2014; 383: 1824-30.  
49  
50  
51  
52  
53  
54  
55  
56  
57  
58  
59  
60

- 1
- 2
- 3
- 4 Seago JA, Williamson A, Atwood C. Longitudinal analyses of nurse staffing and  
4 patient outcomes more about failure to rescue. *JONA* 2006;36:13-21.
- 5
- 6 Rafferty AM, Clarke SP, Coles J, et al. Outcomes of variation in hospital nurse  
7 staffing in English hospitals: Cross-sectional analysis of survey data and discharge  
8 records. *Int J Nurs Stud* 2007;44:175-82.
- 9
- 10
- 11 Zingg W, Holmes A, Dettenkofer M, et al. Hospital organization, management, and  
12 structure for prevention of health-care-associated infection: a systematic review and  
13 expert consensus. *Lancet Inf Dis* 2015;15:212-24.
- 14
- 15
- 16 Lang TA, Hodge M, Olson V, et al. Nurse-patient ratios: a systematic review on the  
17 effects of nurse staffing on patient, nurse employee, and hospital outcomes. *JONA*  
18 2004; 34: 326-37.
- 19
- 20
- 21 Needleman J, Buerhaus P, Pankratz VS, et al. Nurse staffing and inpatient hospital  
22 mortality. *N Eng J Med* 2011;364:1037-45.
- 23
- 24 Donaldson N, Bolton LB, Aydin C, et al. Impact of California's licensed nurse-patient  
25 ratios on unit-level nurse staffing and patient outcomes. *Policy Polit Nurs Prac* 2005;  
26 6:198-10.
- 27
- 28
- 29 Kane RL, Shamliyan TA, Mueller C, et al. The association of registered nurse staffing  
30 levels and patient outcomes: systematic review and meta-analysis. *Med Care*  
31 2007;45:1195-04.
- 32
- 33
- 34 Shuldham C, Parkin C, Firouzi A, et al. The relationship between nurse staffing and  
35 patient outcomes: A case study. *Int J Nurs Stud* 2009;46:986-92.
- 36
- 37 Van den Heede K, Sermeus W, Diya L, et al. Nurse staffing and patient outcomes in  
38 Belgian acute hospitals: cross-sectional analysis of administrative data. *Int J Nurs Stud*  
39 2009;46:928-39.
- 40
- 41
- 42 Tarnow-Mordi WO, Hau C, Warden A, et al. Hospital mortality in relation to staff  
43 workload: a 4-year study in an adult intensive-care unit. *Lancet* 2000;356:185-89.
- 44
- 45 Lankshear AJ, Sheldon TA, Maynard A. Nurse staffing and healthcare outcomes: a  
46 systematic review on the effects of nurse staffing on patient, nurse employee, and  
47 hospital outcomes. *JONA* 2005;28:163-74.
- 48
- 49
- 50 National Institute for Health and Care Excellence. Safe Staffing for nursing in adult  
51 inpatient wards in acute hospitals. Safe staffing guideline1. 2014. [http://:](http://www.nice.org.uk/sg1)  
52 [www.nice.org.uk/sg1](http://www.nice.org.uk/sg1).
- 53
- 54
- 55
- 56
- 57
- 58
- 59
- 60

- 16 Rauhala A. The validity and feasibility of measurement tools for human resources management in nursing case of the RAFAELA system. Doctoral dissertation. Department of Health Policy and Management, University of Kuopio. 2008.
- 17 Adomat R & Hewison A. Assessing patient category/dependence systems for determining the nurse/patient ratio in ICU and HDU: a review of approaches. *Nurs Manag* 2004;12:299-08.
- 18 Junttila JK, Koivu A, Fagerström L, Haatainen K, Nykänen P. 2016. Hospital mortality and optimality of nursing workload: a study on predictive validity of the RAFAELA Nursing Intensity and Staffing system. *Int J Nurs Stud* 2016;60:46-53.
- 19 Rauhala A & Fagerström L. Determining optimal nursing intensity: the RAFAELA method. *Journal of Advanced Nursing* 2004;45:351-359.
- 20 Rauhala A, Kivimäki M, Fagerström L. What degree of work overload is likely to cause increased sickness absenteeism among nurse? Evidence from the RAFAELA patient classification system. *J Adv Nurs* 2007;57:286-95.
- 21 Fagerström L, Rainio A-K, Rauhala A, et al. Professional assessment of optimal nursing care intensity level a new method for resource allocation as an alternative to classical time studies. *Scand J Cari Sci* 2000;14:97-104.
- 22 Andersen MH, Lønning K, Bjørnelv GM, Fagerström L. Nursing intensity and costs of nurse staffing demonstrated by the RAFAELA system: livers. Kidney transplant recipients. *J Nurs Manag* 2016;24:798-805.
- 23 Kinnunen M. Learning from errors in organization – Factors preventing or making it possible. Doctoral thesis. University of Vaasa. *Acta Wasaensia*, 230.
- 24 Holmström A-R. Learning from Medication errors in healthcare – how to make medication error reporting systems work? Doctoral dissertation. Faculty of Pharmacy, University of Helsinki. 2017.
- 25 Vickers AJ, Elkin, EB. Decision curve analysis: a novel method for evaluating prediction models. *Med Decis Making* 2006;26:565-74.
- 26 Spetz J, Donaldson N, Aydin C, et al. How many nurses per patient? Measurements of nurse staffing in health services research. *Health Serv Res* 2008 43:1674-92.
- 27 Classen DC, Resar R, Griffin F, et al. 2011 'Global trigger tool' shows that adverse events in hospitals may be ten times greater than previously measured. *Health Aff (Millwood)* 2011;30:581-9
- 28 Needleman J, Buerhaus P, Mattke S, Stewart M, Zelevinsky K. Nurse-staffing levels and the quality of care in hospitals. *N Engl J Med* 2002;346:1715-22.



- 1  
2  
3 29 Griffiths P, Ball J, Drennan J. et al. Nurse staffing and patient outcomes: Strengths and  
4 limitations of the evidence to inform policy and practice. A review and discussion  
5 paper based on evidence reviewed for the National Institute for Health and Care  
6 Excellence Safe Staffing guideline development. Int J Nurs Studies 2016. DOI:  
7 <http://dx.doi.org/10.1016/j.ijnurstu.2016.03.012>  
8  
9  
10  
11 30 Fasioli DR, Fincke BG, Haddock KS. Going beyond patient classification systems to  
12 create an evidence-based staffing methodology. J of Nurs Adm 2011;41:434-9.  
13  
14 31 Cho SH, Hwang JH, Kim J. Nurse staffing and patient mortality in intensive care  
15 units. Nurs Res 2008;57:322-30.  
16  
17 32 Kerlin MP, Small DS, Cooney E, et al. A randomized trial of nighttime physician  
18 staffing in an intensive care unit. N Engl J Med 2013;368:2201-09.  
19  
20  
21  
22  
23  
24  
25  
26  
27  
28  
29  
30  
31  
32  
33  
34  
35  
36  
37  
38  
39  
40  
41  
42  
43  
44  
45  
46  
47  
48  
49  
50  
51  
52  
53  
54  
55  
56  
57  
58  
59  
60

Table 1. Optimal work load, and daily mean values of workload, staff resources and adverse events per ward in the data

| Ward, id | Optimal load, lower bound | Optimal load, upper bound | OPC per nurse | Patients per nurse | OPC    | OPC per patient | Number of nurses | Incident | Patient affected | Harm to patient | >1 incident | Death | n   | Number of OPC classifications |
|----------|---------------------------|---------------------------|---------------|--------------------|--------|-----------------|------------------|----------|------------------|-----------------|-------------|-------|-----|-------------------------------|
| D1       | 18.90                     | 25.56                     | 21.06         | 1.48               | 251.22 | 14.20           | 12.03            | 0.09     | 0.06             | 0.02            | 0.01        | 0.04  | 365 | 17.70                         |
| D2       | 21.85                     | 29.55                     | 24.45         | 1.60               | 308.81 | 15.28           | 12.74            | 0.13     | 0.07             | 0.04            | 0.02        | 0.07  | 362 | 20.18                         |
| D3       | 21.88                     | 29.60                     | 25.98         | 1.89               | 355.99 | 13.75           | 13.98            | 0.26     | 0.11             | 0.08            | 0.03        | 0.08  | 365 | 25.90                         |
| D4       | 16.85                     | 22.79                     | 23.88         | 1.41               | 425.36 | 16.87           | 17.80            | 0.05     | 0.02             | 0.01            | 0.00        | 0.08  | 365 | 25.19                         |
| D5       | 15.99                     | 21.63                     | 21.92         | 1.41               | 350.84 | 15.52           | 16.15            | 0.12     | 0.08             | 0.04            | 0.02        | 0.05  | 365 | 22.62                         |
| D6       | 14.54                     | 19.66                     | 17.58         | 1.24               | 243.46 | 14.18           | 13.75            | 0.07     | 0.05             | 0.04            | 0.01        | 0.02  | 330 | 17.15                         |
| D7       | 25.47                     | 34.47                     | 33.83         | 2.48               | 343.10 | 13.62           | 10.12            | 0.04     | 0.02             | 0.01            | 0.00        | 0.00  | 364 | 25.17                         |
| D8       | 14.36                     | 20.12                     | 22.84         | 1.38               | 249.46 | 16.50           | 10.88            | 0.26     | 0.11             | 0.05            | 0.03        | 0.18  | 362 | 15.10                         |
| D9       | 20.05                     | 27.13                     | 25.12         | 1.34               | 392.29 | 18.69           | 15.76            | 0.13     | 0.05             | 0.03            | 0.02        | 0.08  | 365 | 20.96                         |
| B1       | 16.14                     | 21.83                     | 20.40         | 1.49               | 182.62 | 13.75           | 8.95             | 0.12     | 0.09             | 0.07            | 0.02        | 0.06  | 341 | 13.29                         |
| B2       | 20.37                     | 27.56                     | 25.13         | 2.00               | 290.05 | 12.61           | 11.59            | 0.23     | 0.16             | 0.10            | 0.06        | 0.08  | 365 | 23.04                         |
| B3       | 17.16                     | 23.21                     | 19.94         | 1.47               | 171.98 | 13.54           | 8.59             | 0.20     | 0.11             | 0.07            | 0.06        | 0.05  | 365 | 12.69                         |
| B4       | 19.65                     | 26.59                     | 24.16         | 1.82               | 292.34 | 13.24           | 12.11            | 0.11     | 0.07             | 0.05            | 0.01        | 0.13  | 365 | 22.09                         |
| B5       | 21.47                     | 29.04                     | 29.16         | 2.00               | 544.95 | 14.59           | 18.73            | 0.20     | 0.16             | 0.10            | 0.01        | 0.16  | 365 | 37.34                         |
| B6       | 18.50                     | 25.10                     | 23.29         | 1.77               | 355.67 | 13.18           | 15.37            | 0.08     | 0.05             | 0.03            | 0.02        | 0.08  | 365 | 26.95                         |
| B7       | 23.27                     | 31.48                     | 28.04         | 1.88               | 474.66 | 14.90           | 17.01            | 0.12     | 0.08             | 0.01            | 0.02        | 0.05  | 365 | 31.85                         |
| B8       | 18.87                     | 25.54                     | 23.17         | 1.68               | 131.87 | 14.04           | 6.21             | 0.13     | 0.10             | 0.02            | 0.02        | 0.02  | 177 | 9.45                          |
| B9       | 19.05                     | 25.78                     | 20.69         | 1.37               | 338.39 | 15.04           | 16.40            | 0.03     | 0.02             | 0.02            | 0.00        | 0.00  | 365 | 22.48                         |
| B10      | 11.51                     | 15.58                     | 13.08         | 0.75               | 134.87 | 17.39           | 10.23            | 0.04     | 0.03             | 0.01            | 0.00        | 0.00  | 362 | 7.72                          |
| B11      | 12.16                     | 16.45                     | 8.65          | 0.49               | 108.10 | 17.52           | 12.38            | 0.02     | 0.01             | 0.00            | 0.00        | 0.00  | 365 | 6.17                          |
| B12      | 17.45                     | 23.60                     | 22.45         | 1.81               | 224.67 | 12.36           | 9.87             | 0.11     | 0.07             | 0.04            | 0.01        | 0.01  | 298 | 18.12                         |
| B13      | 16.25                     | 21.98                     | 19.37         | 1.37               | 245.29 | 14.24           | 12.68            | 0.08     | 0.06             | 0.01            | 0.01        | 0.07  | 365 | 17.30                         |
| B14      | 20.02                     | 27.09                     | 19.43         | 1.50               | 273.30 | 12.97           | 14.05            | 0.10     | 0.08             | 0.01            | 0.02        | 0.11  | 365 | 21.05                         |
| C1       | 22.60                     | 30.60                     | 24.33         | 1.41               | 321.42 | 17.29           | 13.22            | 0.17     | 0.08             | 0.03            | 0.07        | 0.06  | 365 | 18.58                         |
| C2       | 18.70                     | 25.30                     | 25.15         | 1.65               | 397.05 | 15.20           | 15.93            | 0.17     | 0.09             | 0.01            | 0.05        | 0.15  | 366 | 26.12                         |
| C3       | 20.40                     | 27.60                     | 21.77         | 1.29               | 208.62 | 16.87           | 9.52             | 0.10     | 0.09             | 0.01            | 0.02        | 0.03  | 291 | 12.33                         |

|    |       |       |       |       |      |        |       |       |      |      |      |      |      |        |       |
|----|-------|-------|-------|-------|------|--------|-------|-------|------|------|------|------|------|--------|-------|
| 1  |       |       |       |       |      |        |       |       |      |      |      |      |      |        |       |
| 2  |       |       |       |       |      |        |       |       |      |      |      |      |      |        |       |
| 3  |       |       |       |       |      |        |       |       |      |      |      |      |      |        |       |
| 4  |       |       |       |       |      |        |       |       |      |      |      |      |      |        |       |
| 5  | C4    | 19.40 | 26.30 | 23.70 | 1.51 | 228.64 | 15.64 | 9.49  | 0.04 | 0.03 | 0.00 | 0.01 | 0.00 | 291    | 14.58 |
| 6  | A1    | 19.50 | 26.40 | 24.92 | 1.83 | 290.61 | 13.60 | 11.39 | 0.03 | 0.02 | 0.01 | 0.00 | 0.00 | 366    | 21.14 |
| 7  | A2    | 25.60 | 42.10 | 39.84 | 2.81 | 510.25 | 14.21 | 12.83 | 0.04 | 0.03 | 0.02 | 0.00 | 0.00 | 225    | 35.94 |
| 8  | A3    | 33.50 | 45.30 | 40.54 | 2.85 | 607.06 | 14.22 | 15.06 | 0.04 | 0.02 | 0.02 | 0.00 | 0.00 | 366    | 42.64 |
| 9  | A4    | 16.80 | 22.70 | 20.29 | 1.33 | 430.29 | 15.18 | 21.19 | 0.10 | 0.05 | 0.02 | 0.02 | 0.04 | 366    | 28.30 |
| 10 | A5    | 12.30 | 14.90 | 13.33 | 0.97 | 165.18 | 13.85 | 12.34 | 0.15 | 0.10 | 0.08 | 0.04 | 0.00 | 366    | 11.95 |
| 11 | A6    | 11.00 | 14.20 | 11.16 | 0.70 | 117.12 | 16.05 | 10.57 | 0.09 | 0.06 | 0.02 | 0.01 | 0.01 | 360    | 7.31  |
| 12 | A7    | 8.90  | 12.00 | 9.29  | 0.54 | 91.18  | 17.36 | 9.67  | 0.09 | 0.06 | 0.02 | 0.01 | 0.00 | 363    | 5.24  |
| 13 | A8    | 21.10 | 28.50 | 24.45 | 1.48 | 273.20 | 16.50 | 11.24 | 0.02 | 0.02 | 0.01 | 0.00 | 0.06 | 364    | 16.54 |
| 14 | A9    | 15.10 | 20.50 | 20.57 | 1.49 | 198.98 | 13.89 | 9.51  | 0.14 | 0.12 | 0.03 | 0.04 | 0.00 | 315    | 14.52 |
| 15 | Total | 18.52 | 25.22 | 22.41 | 1.53 | 294.59 | 14.97 | 12.93 | 0.11 | 0.07 | 0.03 | 0.02 | 0.05 | 12,475 | 19.97 |

Optimal load refers to the established interval of optimal work load according to the Paoncil measurement (OPC per nurse).

The variables are described in more detail in the main text.

Table 2. Odds ratio for an adverse event (with 95% confidence interval) for four types of patient safety incidents and for patient mortality, according to nursing workload measurement by the RAFAELA system (OPC/nurse) and the standard nursing workload measurement system (patients/nurse), unadjusted and adjusted estimates

|                                  | Incident         | Patient affected | Harm to patient  | >1 incident      | Death            |
|----------------------------------|------------------|------------------|------------------|------------------|------------------|
| OPC/nurse, unadjusted model      |                  |                  |                  |                  |                  |
| Below optimum                    | 0.67 (0.58-0.78) | 0.68 (0.56-0.82) | 0.66 (0.50-0.88) | 0.67 (0.47-0.95) | 0.55 (0.43-0.70) |
| At optimum                       | 1                | 1                | 1                | 1                | 1                |
| Above optimum                    | 1.28 (1.13-1.45) | 1.13 (0.96-1.32) | 1.16 (0.93-1.45) | 1.25 (0.95-1.66) | 1.42 (1.19-1.69) |
| -2 log likelihood                | 8,577.5          | 6,169.3          | 3,523.0          | 2,406.4          | 4,958.6          |
| Akaike Information Criterion     | 8,561.5          | 6,173.3          | 3,527.0          | 2,410.4          | 4,962.6          |
| Nagelkerke R square              | 0.0106           | 0.0056           | 0.0052           | 0.0056           | 0.0160           |
| OPC/nurse, adjusted model        |                  |                  |                  |                  |                  |
| Below optimum                    | 0.79 (0.67-0.93) | 0.78 (0.64-0.96) | 0.85 (0.63-1.14) | 0.73 (0.50-1.07) | 0.78 (0.60-1.00) |
| At optimum                       | 1                | 1                | 1                | 1                | 1                |
| Above optimum                    | 1.24 (1.08-1.42) | 1.08 (0.91-1.28) | 1.11 (0.88-1.41) | 1.32 (0.98-1.79) | 1.43 (1.18-1.73) |
| -2 log likelihood                | 8,010.8          | 5,856.3          | 3,211.1          | 2,187.9          | 4,286.5          |
| Akaike Information Criterion     | 8,106.8          | 5,952.3          | 3,307.1          | 2,283.9          | 4,382.5          |
| Nagelkerke R square              | 0.0960           | 0.0688           | 0.1050           | 0.1041           | 0.1733           |
| Patients/nurse, unadjusted model |                  |                  |                  |                  |                  |
| 1st group                        | 0.74 (0.64-0.86) | 0.85 (0.71-1.02) | 0.79 (0.61-1.04) | 0.80 (0.58-1.10) | 0.47 (0.38-0.58) |
| 2nd group                        | 1                | 1                | 1                | 1                | 1                |
| 3rd group                        | 1.09 (0.95-1.25) | 1.18 (0.99-1.41) | 1.24 (0.96-1.58) | 0.95 (0.70-1.30) | 0.97 (0.81-1.17) |
| -2 log likelihood                | 8,589.1          | 6,180.9          | 3,525.1          | 2,416.5          | 4,958.8          |
| Akaike Information Criterion     | 8,593.1          | 6,184.9          | 3,529.1          | 2,420.5          | 4,962.8          |
| Nagelkerke R square              | 0.0055           | 0.0033           | 0.0045           | 0.0010           | 0.0159           |
| Patients/nurse, adjusted model   |                  |                  |                  |                  |                  |
| 1st group                        | 0.89 (0.75-1.05) | 0.98 (0.80-1.21) | 0.90 (0.66-1.23) | 1.01 (0.71-1.44) | 0.86 (0.68-1.08) |
| 2nd group                        | 1                | 1                | 1                | 1                | 1                |
| 3rd group                        | 1.13 (0.96-1.33) | 1.15 (0.94-1.41) | 1.03 (0.77-1.39) | 1.15 (0.81-1.64) | 1.20 (0.97-1.49) |
| -2 log likelihood                | 8,029.8          | 5,863.1          | 3,213.4          | 2,196.1          | 4,301.8          |
| Akaike Information Criterion     | 8,125.8          | 5,959.1          | 3,309.4          | 2,292.1          | 4,397.8          |
| Nagelkerke R square              | 0.0931           | 0.0674           | 0.1043           | 0.1004           | 0.1698           |
| Number of events                 | 1,367            | 848              | 400              | 246              | 636              |

The table summarises results from 20 different models estimated on 12,475 calendar days, representing 36 wards at four hospital units.

Adjusted model refers to models adjusted for ward-specific effects and effects of the of the week, holiday and season.

Estimates for ward-specific effects and effects of day of the week, holiday and season are found in the supplementary electronic files.

At optimum refers to the assumed optimal nursing intensity point with  $\pm 15\%$  deviation, as defined by the RAFAELA system.

Patients/nurse refers to a categorisation into three equally large groups.

Categories used for day of the week are Monday, Tuesday, Wednesday, Thursday, Friday, Saturday, and Sunday.

Categories used for holiday are No or Yes, where Yes refers to Easter, Midsummer, Christmas and New Year.

Categories used for season are January-March, April-May, June-August, September-October, and November-December.

## Figures legends

Figure 1. Decision curves for incident according to the OPC/nurse measure and patients/nurse measure, respectively

Figure 2. Decision curves for patient affected according to the OPC/nurse measure and patients/nurse measure, respectively

Figure 3. Decision curves for harm to patient according to the OPC/nurse measure and patients/nurse measure, respectively

Figure 4. Decision curves for >1 incident according to the OPC/nurse measure and patients/nurse measure, respectively

Figure 5. Decision curves for death according to the OPC/nurse measure and patients/nurse measure, respectively

1  
2  
3  
4  
5  
6  
7  
8  
9  
10  
11  
12  
13  
14  
15  
16  
17  
18  
19  
20  
21  
22  
23  
24  
25  
26  
27  
28  
29  
30  
31  
32  
33  
34  
35  
36  
37  
38  
39  
40  
41  
42  
43  
44  
45  
46  
47  
48  
49  
50  
51  
52  
53  
54  
55  
56  
57  
58  
59  
60

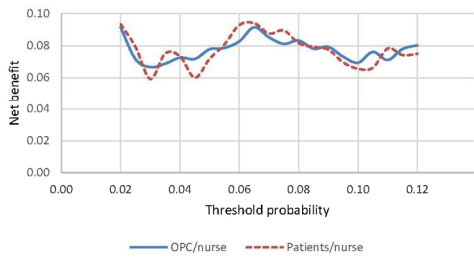

Figure 1. Decision curves for incident according to the OPC/nurse measure and patients/nurse measure, respectively

210x297mm (200 x 200 DPI)

1  
2  
3  
4  
5  
6  
7  
8  
9  
10  
11  
12  
13  
14  
15  
16  
17  
18  
19  
20  
21  
22  
23  
24  
25  
26  
27  
28  
29  
30  
31  
32  
33  
34  
35  
36  
37  
38  
39  
40  
41  
42  
43  
44  
45  
46  
47  
48  
49  
50  
51  
52  
53  
54  
55  
56  
57  
58  
59  
60

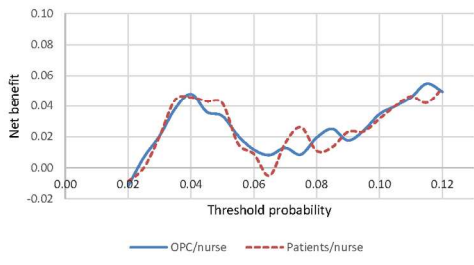

Figure 2. Decision curves for patient affected according to the OPC/nurse measure and patients/nurse measure, respectively

210x297mm (200 x 200 DPI)

1  
2  
3  
4  
5  
6  
7  
8  
9  
10  
11  
12  
13  
14  
15  
16  
17  
18  
19  
20  
21  
22  
23  
24  
25  
26  
27  
28  
29  
30  
31  
32  
33  
34  
35  
36  
37  
38  
39  
40  
41  
42  
43  
44  
45  
46  
47  
48  
49  
50  
51  
52  
53  
54  
55  
56  
57  
58  
59  
60

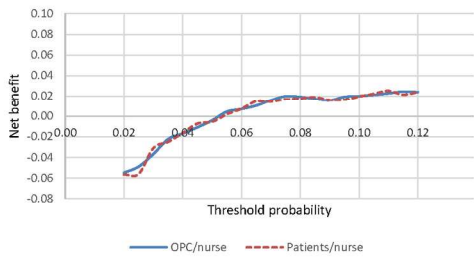

Figure 3. Decision curves for harm to patient according to the OPC/nurse measure and patients/nurse measure, respectively

210x297mm (200 x 200 DPI)



1  
2  
3  
4  
5  
6  
7  
8  
9  
10  
11  
12  
13  
14  
15  
16  
17  
18  
19  
20  
21  
22  
23  
24  
25  
26  
27  
28  
29  
30  
31  
32  
33  
34  
35  
36  
37  
38  
39  
40  
41  
42  
43  
44  
45  
46  
47  
48  
49  
50  
51  
52  
53  
54  
55  
56  
57  
58  
59  
60

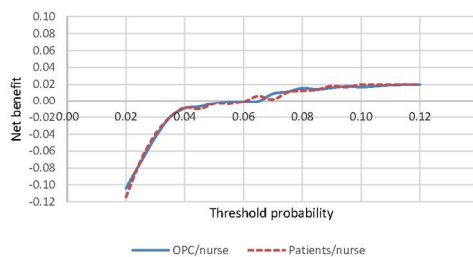

Figure 4. Decision curves for >1 incident according to the OPC/nurse measure and patients/nurse measure, respectively

210x297mm (200 x 200 DPI)

1  
2  
3  
4  
5  
6  
7  
8  
9  
10  
11  
12  
13  
14  
15  
16  
17  
18  
19  
20  
21  
22  
23  
24  
25  
26  
27  
28  
29  
30  
31  
32  
33  
34  
35  
36  
37  
38  
39  
40  
41  
42  
43  
44  
45  
46  
47  
48  
49  
50  
51  
52  
53  
54  
55  
56  
57  
58  
59  
60

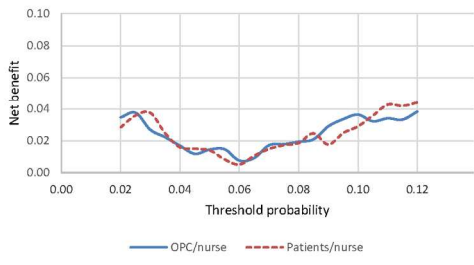

Figure 5. Decision curves for death according to the OPC/nurse measure and patients/nurse measure, respectively

210x297mm (200 x 200 DPI)

COMMENT körs på abo\_bjo\_vasa\_v1.sav

COMMENT utan kontrollvariabler

COMMENT läs resultaten enligt Table 1, första kolumnen, sex modeller, and  
ra kolumnen, sex modeller, osv

COMMENT identisk med enbart-vasa-varianten

\*\*

LOGISTIC REGRESSION VARIABLES hand01

/METHOD=ENTER bv1

/CONTRAST (bv1)=Indicator(1)

/PRINT=CI(95)

/CRITERIA=PIN(0.05) POUT(0.10) ITERATE(20) CUT(0.5).

## Logistic Regression

[DataSet6] C:\cWordjan\Rafaela\_VCS\alla\_tillsammans\abo\_bjo\_vasa\_v1.sav

### Case Processing Summary

| Unweighted Cases <sup>a</sup> |                      | N     | Percent |
|-------------------------------|----------------------|-------|---------|
| Selected Cases                | Included in Analysis | 12475 | 100,0   |
|                               | Missing Cases        | 0     | ,0      |
|                               | Total                | 12475 | 100,0   |
| Unselected Cases              |                      | 0     | ,0      |
| Total                         |                      | 12475 | 100,0   |

a. If weight is in effect, see classification table for the total number of cases.

### Dependent Variable Encoding

| Original Value      | Internal Value |
|---------------------|----------------|
| 0 ingen händelse    | 0              |
| 1 minst en händelse | 1              |

### Categorical Variables Codings

|                           |                   | Frequency | Parameter coding |       |
|---------------------------|-------------------|-----------|------------------|-------|
|                           |                   |           | (1)              | (2)   |
| bv1 belastning vs paoncil | 1 medelbelastning | 5380      | ,000             | ,000  |
|                           | 2 underbelastning | 3222      | 1,000            | ,000  |
|                           | 3 överbelastning  | 3873      | ,000             | 1,000 |

## Block 0: Beginning Block

Classification Table<sup>a,b</sup>

| Observed |                              | Predicted           |                     |
|----------|------------------------------|---------------------|---------------------|
|          |                              | 0 ingen hændelse    | 1 minst en hændelse |
| Step 0   | hand01 hændelse nej eller ja | 0 ingen hændelse    | 11108               |
|          |                              | 1 minst en hændelse | 1367                |
|          | Overall Percentage           |                     |                     |

Classification Table<sup>a,b</sup>

| Observed |                              | Predicted           |       |
|----------|------------------------------|---------------------|-------|
|          |                              | Percentage Correct  |       |
| Step 0   | hand01 hændelse nej eller ja | 0 ingen hændelse    | 100,0 |
|          |                              | 1 minst en hændelse | ,0    |
|          | Overall Percentage           |                     | 89,0  |

a. Constant is included in the model.

b. The cut value is ,500

Variables in the Equation

|                 | B      | S.E. | Wald     | df | Sig. | Exp(B) |
|-----------------|--------|------|----------|----|------|--------|
| Step 0 Constant | -2,095 | ,029 | 5342,584 | 1  | ,000 | ,123   |

Variables not in the Equation

|                    | Score  | df | Sig. |
|--------------------|--------|----|------|
| Step 0 Variables   |        |    |      |
| bv1                | 64,197 | 2  | ,000 |
| bv1(1)             | 48,244 | 1  | ,000 |
| bv1(2)             | 41,190 | 1  | ,000 |
| Overall Statistics | 64,197 | 2  | ,000 |

## Block 1: Method = Enter

Omnibus Tests of Model Coefficients

|             | Chi-square | df | Sig. |
|-------------|------------|----|------|
| Step 1 Step | 66,122     | 2  | ,000 |
| Block       | 66,122     | 2  | ,000 |
| Model       | 66,122     | 2  | ,000 |

Model Summary

| Step | -2 Log likelihood     | Cox & Snell R Square | Nagelkerke R Square |
|------|-----------------------|----------------------|---------------------|
| 1    | 8557,461 <sup>a</sup> | ,005                 | ,011                |

a. Estimation terminated at iteration number 5 because parameter estimates changed by less than ,001.

Classification Table<sup>a</sup>

| Observed           |                              | Predicted           |                     |
|--------------------|------------------------------|---------------------|---------------------|
|                    |                              | 0 ingen händelse    | 1 minst en händelse |
| Step 1             | hand01 händelse nej eller ja | 0 ingen händelse    | 11108               |
|                    |                              | 1 minst en händelse | 1367                |
| Overall Percentage |                              |                     |                     |

Classification Table<sup>a</sup>

| Observed           |                              | Predicted           |       |
|--------------------|------------------------------|---------------------|-------|
|                    |                              | Percentage Correct  |       |
| Step 1             | hand01 händelse nej eller ja | 0 ingen händelse    | 100,0 |
|                    |                              | 1 minst en händelse | ,0    |
| Overall Percentage |                              |                     | 89,0  |

a. The cut value is ,500

Variables in the Equation

|                     |          | B      | S.E. | Wald     | df | Sig. | Exp(B) | 95% C.I.. |
|---------------------|----------|--------|------|----------|----|------|--------|-----------|
|                     |          | Lower  |      |          |    |      |        |           |
| Step 1 <sup>a</sup> | bv1      |        |      | 63,025   | 2  | ,000 |        |           |
|                     | bv1(1)   | -,398  | ,079 | 25,244   | 1  | ,000 | ,671   | ,575      |
|                     | bv1(2)   | ,244   | ,064 | 14,581   | 1  | ,000 | 1,277  | 1,126     |
|                     | Constant | -2,090 | ,044 | 2302,164 | 1  | ,000 | ,124   |           |

Variables in the Equation

|                     |          | 95% C.I.... |
|---------------------|----------|-------------|
|                     |          | Upper       |
| Step 1 <sup>a</sup> | bv1      |             |
|                     | bv1(1)   | ,784        |
|                     | bv1(2)   | 1,447       |
|                     | Constant |             |

a. Variable(s) entered on step 1: bv1.

LOGISTIC REGRESSION VARIABLES hand01

/METHOD=ENTER bv2

/CONTRAST (bv2)=Indicator(1)

/PRINT=CI(95)

/CRITERIA=PIN(0.05) POUT(0.10) ITERATE(20) CUT(0.5).

## Logistic Regression

[DataSet6] C:\cWordjan\Rafaela\_VCS\alla\_tillsammans\abo\_bjo\_vasa\_v1.sav

### Case Processing Summary

| Unweighted Cases <sup>a</sup> |                      | N     | Percent |
|-------------------------------|----------------------|-------|---------|
| Selected Cases                | Included in Analysis | 12475 | 100,0   |
|                               | Missing Cases        | 0     | ,0      |
|                               | Total                | 12475 | 100,0   |
| Unselected Cases              |                      | 0     | ,0      |
| Total                         |                      | 12475 | 100,0   |

a. If weight is in effect, see classification table for the total number of cases.

### Dependent Variable Encoding

| Original Value      | Internal Value |
|---------------------|----------------|
| 0 ingen händelse    | 0              |
| 1 minst en händelse | 1              |

### Categorical Variables Codings

|                                             |                   | Frequency | Parameter coding |       |
|---------------------------------------------|-------------------|-----------|------------------|-------|
|                                             |                   |           | (1)              | (2)   |
| bv2 belastning vs paencil halva intervallet | 1 medelbelastning | 2788      | ,000             | ,000  |
|                                             | 2 underbelastning | 4419      | 1,000            | ,000  |
|                                             | 3 överbelastning  | 5268      | ,000             | 1,000 |

## Block 0: Beginning Block

### Classification Table<sup>a,b</sup>

| Observed           |                              | Predicted                    |                     |   |
|--------------------|------------------------------|------------------------------|---------------------|---|
|                    |                              | hand01 händelse nej eller ja |                     |   |
|                    |                              | 0 ingen händelse             | 1 minst en händelse |   |
| Step 0             | hand01 händelse nej eller ja | 0 ingen händelse             | 11108               | 0 |
|                    |                              | 1 minst en händelse          | 1367                | 0 |
| Overall Percentage |                              |                              |                     |   |

### Classification Table<sup>a,b</sup>

| Observed           |                              | Predicted           |       |
|--------------------|------------------------------|---------------------|-------|
|                    |                              | Percentage Correct  |       |
| Step 0             | hand01 händelse nej eller ja | 0 ingen händelse    | 100,0 |
|                    |                              | 1 minst en händelse | ,0    |
| Overall Percentage |                              |                     | 89,0  |

a. Constant is included in the model.

b. The cut value is ,500

## Variables in the Equation

|                 | B      | S.E. | Wald     | df | Sig. | Exp(B) |
|-----------------|--------|------|----------|----|------|--------|
| Step 0 Constant | -2,095 | ,029 | 5342,584 | 1  | ,000 | ,123   |

## Variables not in the Equation

|                    | Score  | df | Sig. |
|--------------------|--------|----|------|
| Step 0 Variables   |        |    |      |
| bv2                | 50,191 | 2  | ,000 |
| bv2(1)             | 44,434 | 1  | ,000 |
| bv2(2)             | 36,942 | 1  | ,000 |
| Overall Statistics | 50,191 | 2  | ,000 |

## Block 1: Method = Enter

## Omnibus Tests of Model Coefficients

|             | Chi-square | df | Sig. |
|-------------|------------|----|------|
| Step 1 Step | 51,341     | 2  | ,000 |
| Block       | 51,341     | 2  | ,000 |
| Model       | 51,341     | 2  | ,000 |

## Model Summary

| Step | -2 Log likelihood     | Cox & Snell R Square | Nagelkerke R Square |
|------|-----------------------|----------------------|---------------------|
| 1    | 8572,241 <sup>a</sup> | ,004                 | ,008                |

a. Estimation terminated at iteration number 5 because parameter estimates changed by less than ,001.

Classification Table<sup>a</sup>

|                    |                              | Predicted                    |                     |
|--------------------|------------------------------|------------------------------|---------------------|
|                    |                              | hand01 händelse nej eller ja |                     |
| Observed           |                              | 0 ingen händelse             | 1 minst en händelse |
| Step 1             | hand01 händelse nej eller ja | 0 ingen händelse             | 11108               |
|                    |                              | 1 minst en händelse          | 1367                |
| Overall Percentage |                              |                              | 0                   |

Classification Table<sup>a</sup>

|                    |                              | Predicted           |                     |
|--------------------|------------------------------|---------------------|---------------------|
|                    |                              | Percentage Correct  |                     |
| Observed           |                              | 0 ingen händelse    | 1 minst en händelse |
| Step 1             | hand01 händelse nej eller ja | 0 ingen händelse    | 100,0               |
|                    |                              | 1 minst en händelse | ,0                  |
| Overall Percentage |                              |                     | 89,0                |

a. The cut value is ,500

## Variables in the Equation

|                         | B      | S.E. | Wald     | df | Sig. | Exp(B) | 95% C.I.. |
|-------------------------|--------|------|----------|----|------|--------|-----------|
|                         |        |      |          |    |      |        | Lower     |
| Step 1 <sup>a</sup> bv2 |        |      | 49,589   | 2  | ,000 |        |           |
| bv2(1)                  | -,313  | ,081 | 14,940   | 1  | ,000 | ,732   | ,624      |
| bv2(2)                  | ,166   | ,073 | 5,185    | 1  | ,023 | 1,180  | 1,023     |
| Constant                | -2,071 | ,060 | 1188,882 | 1  | ,000 | ,126   |           |

## Variables in the Equation

|                         | 95% C.I.... |
|-------------------------|-------------|
|                         | Upper       |
| Step 1 <sup>a</sup> bv2 |             |
| bv2(1)                  | ,857        |
| bv2(2)                  | 1,361       |
| Constant                |             |

a. Variable(s) entered on step 1: bv2.

```
LOGISTIC REGRESSION VARIABLES hand01
  /METHOD=ENTER bv3
  /CONTRAST (bv3)=Indicator(1)
  /PRINT=CI(95)
  /CRITERIA=PIN(0.05) POUT(0.10) ITERATE(20) CUT(0.5).
```

## Logistic Regression

[DataSet6] C:\cWordjan\Rafaela\_VCS\alla\_tillsammans\abo\_bjo\_vasa\_v1.sav

### Case Processing Summary

| Unweighted Cases <sup>a</sup> |                      | N     | Percent |
|-------------------------------|----------------------|-------|---------|
| Selected Cases                | Included in Analysis | 12475 | 100,0   |
|                               | Missing Cases        | 0     | ,0      |
|                               | Total                | 12475 | 100,0   |
| Unselected Cases              |                      | 0     | ,0      |
| Total                         |                      | 12475 | 100,0   |

a. If weight is in effect, see classification table for the total number of cases.

### Dependent Variable Encoding

| Original Value      | Internal Value |
|---------------------|----------------|
| 0 ingen händelse    | 0              |
| 1 minst en händelse | 1              |



## Categorical Variables Codings

|                                              |                   | Frequency | Parameter coding |       |
|----------------------------------------------|-------------------|-----------|------------------|-------|
|                                              |                   |           | (1)              | (2)   |
| bv3 belasnting vs paencil dubbla intervallet | 1 medelbelastning | 9121      | ,000             | ,000  |
|                                              | 2 underbelastning | 1505      | 1,000            | ,000  |
|                                              | 3 överbelastning  | 1849      | ,000             | 1,000 |

## Block 0: Beginning Block

Classification Table<sup>a,b</sup>

| Observed           |                              | Predicted                    |                     |
|--------------------|------------------------------|------------------------------|---------------------|
|                    |                              | hand01 händelse nej eller ja |                     |
|                    |                              | 0 ingen händelse             | 1 minst en händelse |
| Step 0             | hand01 händelse nej eller ja | 0 ingen händelse             | 11108               |
|                    |                              | 1 minst en händelse          | 1367                |
| Overall Percentage |                              |                              |                     |

Classification Table<sup>a,b</sup>

| Observed           |                              | Predicted           |       |
|--------------------|------------------------------|---------------------|-------|
|                    |                              | Percentage Correct  |       |
| Step 0             | hand01 händelse nej eller ja | 0 ingen händelse    | 100,0 |
|                    |                              | 1 minst en händelse | ,0    |
| Overall Percentage |                              |                     | 89,0  |

a. Constant is included in the model.

b. The cut value is ,500

## Variables in the Equation

|                 | B      | S.E. | Wald     | df | Sig. | Exp(B) |
|-----------------|--------|------|----------|----|------|--------|
| Step 0 Constant | -2,095 | ,029 | 5342,584 | 1  | ,000 | ,123   |

## Variables not in the Equation

|                    | Score  | df     | Sig. |
|--------------------|--------|--------|------|
| Step 0 Variables   |        |        |      |
|                    | bv3    | 48,977 | 2    |
|                    | bv3(1) | 36,781 | 1    |
|                    | bv3(2) | 19,249 | 1    |
| Overall Statistics | 48,977 | 2      | ,000 |

## Block 1: Method = Enter

## Omnibus Tests of Model Coefficients

|        |       | Chi-square | df | Sig. |
|--------|-------|------------|----|------|
| Step 1 | Step  | 52,926     | 2  | ,000 |
|        | Block | 52,926     | 2  | ,000 |
|        | Model | 52,926     | 2  | ,000 |

## Model Summary

| Step | -2 Log likelihood     | Cox & Snell R Square | Nagelkerke R Square |
|------|-----------------------|----------------------|---------------------|
| 1    | 8570,656 <sup>a</sup> | ,004                 | ,008                |

a. Estimation terminated at iteration number 5 because parameter estimates changed by less than ,001.

Classification Table<sup>a</sup>

|                    |                              | Predicted                    |                     |
|--------------------|------------------------------|------------------------------|---------------------|
|                    |                              | hand01 hændelse nej eller ja |                     |
| Observed           |                              | 0 ingen hændelse             | 1 minst en hændelse |
| Step 1             | hand01 hændelse nej eller ja | 0 ingen hændelse             | 11108               |
|                    |                              | 1 minst en hændelse          | 1367                |
| Overall Percentage |                              |                              | 0                   |

Classification Table<sup>a</sup>

| Observed           |                              | Predicted           |
|--------------------|------------------------------|---------------------|
|                    |                              | Percentage Correct  |
| Step 1             | hand01 hændelse nej eller ja | 0 ingen hændelse    |
|                    |                              | 1 minst en hændelse |
| Overall Percentage |                              | 89,0                |

a. The cut value is ,500

## Variables in the Equation

|                     |          | B      | S.E. | Wald     | df | Sig. | Exp(B) | 95% C.I.. |
|---------------------|----------|--------|------|----------|----|------|--------|-----------|
|                     |          |        |      |          |    |      |        | Lower     |
| Step 1 <sup>a</sup> | bv3      |        |      | 47,569   | 2  | ,000 |        |           |
|                     | bv3(1)   | -,607  | ,111 | 30,158   | 1  | ,000 | ,545   | ,439      |
|                     | bv3(2)   | ,255   | ,075 | 11,566   | 1  | ,001 | 1,291  | 1,114     |
|                     | Constant | -2,079 | ,033 | 3894,857 | 1  | ,000 | ,125   |           |

## Variables in the Equation

|                     |          | 95% C.I.... |
|---------------------|----------|-------------|
|                     |          | Upper       |
| Step 1 <sup>a</sup> | bv3      |             |
|                     | bv3(1)   | ,677        |
|                     | bv3(2)   | 1,495       |
|                     | Constant |             |

a. Variable(s) entered on step 1: bv3.

```
LOGISTIC REGRESSION VARIABLES hand01
/METHOD=ENTER sv3
/CONTRAST (sv3)=Indicator(1)
/PRINT=CI(95)
/CRITERIA=PIN(0.05) POUT(0.10) ITERATE(20) CUT(0.5).
```

## Logistic Regression

[DataSet6] C:\cWordjan\Rafaela\_VCS\alla\_tillsammans\abo\_bjo\_vasa\_v1.sav

## Case Processing Summary

| Unweighted Cases <sup>a</sup> |                      | N     | Percent |
|-------------------------------|----------------------|-------|---------|
| Selected Cases                | Included in Analysis | 12475 | 100,0   |
|                               | Missing Cases        | 0     | ,0      |
|                               | Total                | 12475 | 100,0   |
| Unselected Cases              |                      | 0     | ,0      |
| Total                         |                      | 12475 | 100,0   |

a. If weight is in effect, see classification table for the total number of cases.

## Dependent Variable Encoding

| Original Value      | Internal Value |
|---------------------|----------------|
| 0 ingen händelse    | 0              |
| 1 minst en händelse | 1              |

## Categorical Variables Codings

|                              |                      | Frequency | Parameter coding |       |
|------------------------------|----------------------|-----------|------------------|-------|
|                              |                      |           | (1)              | (2)   |
| sv3 tredjedelar för standard | 1 andra tredjedelen  | 3172      | ,000             | ,000  |
|                              | 2 första tredjedelen | 4718      | 1,000            | ,000  |
|                              | 3 tredje tredjedelen | 4585      | ,000             | 1,000 |

## Block 0: Beginning Block

Classification Table<sup>a,b</sup>

| Observed           |                              |                     | Predicted        |                     |
|--------------------|------------------------------|---------------------|------------------|---------------------|
|                    |                              |                     | 0 ingen hændelse | 1 minst en hændelse |
| Step 0             | hand01 hændelse nej eller ja | 0 ingen hændelse    | 11108            | 0                   |
|                    |                              | 1 minst en hændelse | 1367             | 0                   |
| Overall Percentage |                              |                     |                  |                     |

Classification Table<sup>a,b</sup>

| Observed           |                              |                     | Predicted          |
|--------------------|------------------------------|---------------------|--------------------|
|                    |                              |                     | Percentage Correct |
| Step 0             | hand01 hændelse nej eller ja | 0 ingen hændelse    | 100,0              |
|                    |                              | 1 minst en hændelse | ,0                 |
| Overall Percentage |                              |                     | 89,0               |

a. Constant is included in the model.

b. The cut value is ,500

Variables in the Equation

|                 | B      | S.E. | Wald     | df | Sig. | Exp(B) |
|-----------------|--------|------|----------|----|------|--------|
| Step 0 Constant | -2,095 | ,029 | 5342,584 | 1  | ,000 | ,123   |

Variables not in the Equation

|                      | Score  | df | Sig. |
|----------------------|--------|----|------|
| Step 0 Variables sv3 | 33,743 | 2  | ,000 |
| sv3(1)               | 32,193 | 1  | ,000 |
| sv3(2)               | 19,134 | 1  | ,000 |
| Overall Statistics   | 33,743 | 2  | ,000 |

## Block 1: Method = Enter

Omnibus Tests of Model Coefficients

|             | Chi-square | df | Sig. |
|-------------|------------|----|------|
| Step 1 Step | 34,433     | 2  | ,000 |
| Block       | 34,433     | 2  | ,000 |
| Model       | 34,433     | 2  | ,000 |

Model Summary

| Step | -2 Log likelihood     | Cox & Snell R Square | Nagelkerke R Square |
|------|-----------------------|----------------------|---------------------|
| 1    | 8589,150 <sup>a</sup> | ,003                 | ,006                |

a. Estimation terminated at iteration number 5 because parameter estimates changed by less than ,001.

Classification Table<sup>a</sup>

| Observed |                              | Predicted           |                     |
|----------|------------------------------|---------------------|---------------------|
|          |                              | 0 ingen händelse    | 1 minst en händelse |
| Step 1   | hand01 händelse nej eller ja | 0 ingen händelse    | 11108               |
|          |                              | 1 minst en händelse | 1367                |
|          | Overall Percentage           |                     |                     |

Classification Table<sup>a</sup>

| Observed |                              | Predicted           |       |
|----------|------------------------------|---------------------|-------|
|          |                              | Percentage Correct  |       |
| Step 1   | hand01 händelse nej eller ja | 0 ingen händelse    | 100,0 |
|          |                              | 1 minst en händelse | ,0    |
|          | Overall Percentage           |                     | 89,0  |

a. The cut value is ,500

Variables in the Equation

|                     |          | B      | S.E. | Wald     | df | Sig. | Exp(B) | 95% C.I.<br>Lower |
|---------------------|----------|--------|------|----------|----|------|--------|-------------------|
| Step 1 <sup>a</sup> | sv3      |        |      | 33,479   | 2  | ,000 |        |                   |
|                     | sv3(1)   | -,298  | ,075 | 15,716   | 1  | ,000 | ,742   | ,640              |
|                     | sv3(2)   | ,084   | ,071 | 1,412    | 1  | ,235 | 1,088  | ,947              |
|                     | Constant | -2,025 | ,055 | 1339,704 | 1  | ,000 | ,132   |                   |

Variables in the Equation

|                     |          | 95% C.I....<br>Upper |
|---------------------|----------|----------------------|
| Step 1 <sup>a</sup> | sv3      |                      |
|                     | sv3(1)   | ,860                 |
|                     | sv3(2)   | 1,251                |
|                     | Constant |                      |

a. Variable(s) entered on step 1: sv3.

LOGISTIC REGRESSION VARIABLES hand01

/METHOD=ENTER sv5

/CONTRAST (sv5)=Indicator(1)

/PRINT=CI(95)

/CRITERIA=PIN(0.05) POUT(0.10) ITERATE(20) CUT(0.5).

## Logistic Regression

[DataSet6] C:\cWordjan\Rafaela\_VCS\alla\_tillsammans\abo\_bjo\_vasa\_v1.sav

**Case Processing Summary**

| Unweighted Cases <sup>a</sup> |                      | N     | Percent |
|-------------------------------|----------------------|-------|---------|
| Selected Cases                | Included in Analysis | 12475 | 100,0   |
|                               | Missing Cases        | 0     | ,0      |
|                               | Total                | 12475 | 100,0   |
| Unselected Cases              |                      | 0     | ,0      |
| Total                         |                      | 12475 | 100,0   |

a. If weight is in effect, see classification table for the total number of cases.

**Dependent Variable Encoding**

| Original Value      | Internal Value |
|---------------------|----------------|
| 0 ingen händelse    | 0              |
| 1 minst en händelse | 1              |

**Categorical Variables Codings**

|                            |                    | Frequency | Parameter coding |       |       |       |
|----------------------------|--------------------|-----------|------------------|-------|-------|-------|
|                            |                    |           | (1)              | (2)   | (3)   | (4)   |
| sv5 kvintiler för standard | 1 tredje kvintilen | 1863      | ,000             | ,000  | ,000  | ,000  |
|                            | 2 första kvintilen | 3570      | 1,000            | ,000  | ,000  | ,000  |
|                            | 3 andra kvintilen  | 1759      | ,000             | 1,000 | ,000  | ,000  |
|                            | 4 fjärde kvintilen | 2327      | ,000             | ,000  | 1,000 | ,000  |
|                            | 5 femte kvintilen  | 2956      | ,000             | ,000  | ,000  | 1,000 |

**Block 0: Beginning Block****Classification Table<sup>a,b</sup>**

| Observed           |                              |                     | Predicted        |                     |
|--------------------|------------------------------|---------------------|------------------|---------------------|
|                    |                              |                     | 0 ingen händelse | 1 minst en händelse |
| Step 0             | hand01 händelse nej eller ja | 0 ingen händelse    | 11108            | 0                   |
|                    |                              | 1 minst en händelse | 1367             | 0                   |
| Overall Percentage |                              |                     |                  |                     |

**Classification Table<sup>a,b</sup>**

| Observed           |                              |                     | Predicted          |
|--------------------|------------------------------|---------------------|--------------------|
|                    |                              |                     | Percentage Correct |
| Step 0             | hand01 händelse nej eller ja | 0 ingen händelse    | 100,0              |
|                    |                              | 1 minst en händelse | ,0                 |
| Overall Percentage |                              |                     | 89,0               |

a. Constant is included in the model.

b. The cut value is ,500

## Variables in the Equation

|                 | B      | S.E. | Wald     | df | Sig. | Exp(B) |
|-----------------|--------|------|----------|----|------|--------|
| Step 0 Constant | -2,095 | ,029 | 5342,584 | 1  | ,000 | ,123   |

## Variables not in the Equation

|                      | Score  | df | Sig. |
|----------------------|--------|----|------|
| Step 0 Variables sv5 | 37,974 | 4  | ,000 |
| sv5(1)               | 31,998 | 1  | ,000 |
| sv5(2)               | ,095   | 1  | ,757 |
| sv5(3)               | 1,220  | 1  | ,269 |
| sv5(4)               | 15,862 | 1  | ,000 |
| Overall Statistics   | 37,974 | 4  | ,000 |

## Block 1: Method = Enter

## Omnibus Tests of Model Coefficients

|             | Chi-square | df | Sig. |
|-------------|------------|----|------|
| Step 1 Step | 39,044     | 4  | ,000 |
| Block       | 39,044     | 4  | ,000 |
| Model       | 39,044     | 4  | ,000 |

## Model Summary

| Step | -2 Log likelihood     | Cox & Snell R Square | Nagelkerke R Square |
|------|-----------------------|----------------------|---------------------|
| 1    | 8584,539 <sup>a</sup> | ,003                 | ,006                |

a. Estimation terminated at iteration number 5 because parameter estimates changed by less than ,001.

Classification Table<sup>a</sup>

|                                     |                     | Predicted                    |   |
|-------------------------------------|---------------------|------------------------------|---|
|                                     |                     | hand01 händelse nej eller ja |   |
| Observed                            | 0 ingen händelse    | 11108                        | 0 |
|                                     | 1 minst en händelse | 1367                         | 0 |
| Step 1 hand01 händelse nej eller ja | 0 ingen händelse    | 11108                        | 0 |
|                                     | 1 minst en händelse | 1367                         | 0 |
| Overall Percentage                  |                     |                              |   |

Classification Table<sup>a</sup>

|                                     |                     | Predicted          |
|-------------------------------------|---------------------|--------------------|
|                                     |                     | Percentage Correct |
| Step 1 hand01 händelse nej eller ja | 0 ingen händelse    | 100,0              |
|                                     | 1 minst en händelse | ,0                 |
| Overall Percentage                  |                     | 89,0               |

a. The cut value is ,500

**Variables in the Equation**

|                     |          | B      | S.E. | Wald    | df | Sig. | Exp(B) | 95% C.I.<br>Lower |
|---------------------|----------|--------|------|---------|----|------|--------|-------------------|
| Step 1 <sup>a</sup> | sv5      |        |      | 37,583  | 4  | ,000 |        |                   |
|                     | sv5(1)   | -,386  | ,093 | 17,124  | 1  | ,000 | ,680   | ,566              |
|                     | sv5(2)   | -,122  | ,105 | 1,346   | 1  | ,246 | ,885   | ,721              |
|                     | sv5(3)   | -,035  | ,096 | ,134    | 1  | ,714 | ,965   | ,799              |
|                     | sv5(4)   | ,090   | ,090 | 1,012   | 1  | ,315 | 1,095  | ,918              |
|                     | Constant | -1,995 | ,071 | 781,526 | 1  | ,000 | ,136   |                   |

**Variables in the Equation**

|                     |          | 95% C.I....<br>Upper |
|---------------------|----------|----------------------|
| Step 1 <sup>a</sup> | sv5      |                      |
|                     | sv5(1)   | ,816                 |
|                     | sv5(2)   | 1,088                |
|                     | sv5(3)   | 1,166                |
|                     | sv5(4)   | 1,306                |
|                     | Constant |                      |

a. Variable(s) entered on step 1: sv5.

```
LOGISTIC REGRESSION VARIABLES hand01
  /METHOD=ENTER sv7
  /CONTRAST (sv7)=Indicator(1)
  /PRINT=CI(95)
  /CRITERIA=PIN(0.05) POUT(0.10) ITERATE(20) CUT(0.5).
```

## Logistic Regression

[DataSet6] C:\cWordjan\Rafaela\_VCS\alla\_tillsammans\abo\_bjo\_vasa\_v1.sav

**Case Processing Summary**

| Unweighted Cases <sup>a</sup> |                      | N     | Percent |
|-------------------------------|----------------------|-------|---------|
| Selected Cases                | Included in Analysis | 12475 | 100,0   |
|                               | Missing Cases        | 0     | ,0      |
|                               | Total                | 12475 | 100,0   |
| Unselected Cases              |                      | 0     | ,0      |
| Total                         |                      | 12475 | 100,0   |

a. If weight is in effect, see classification table for the total number of cases.



## Dependent Variable Encoding

| Original Value      | Internal Value |
|---------------------|----------------|
| 0 ingen händelse    | 0              |
| 1 minst en händelse | 1              |

## Categorical Variables Codings

|                              |                      | Frequency | Parameter coding |       |       |
|------------------------------|----------------------|-----------|------------------|-------|-------|
|                              |                      |           | (1)              | (2)   | (3)   |
| sv7 sjättedelar för standard | 1 fjärde sjundedelen | 1423      | ,000             | ,000  | ,000  |
|                              | 2 första sjundedelen | 3031      | 1,000            | ,000  | ,000  |
|                              | 3 andra sjundedelen  | 1238      | ,000             | 1,000 | ,000  |
|                              | 4 tredje sjundedelen | 1255      | ,000             | ,000  | 1,000 |
|                              | 5 femte sjundedelen  | 1445      | ,000             | ,000  | ,000  |
|                              | 6 sjätte sjundedelen | 1948      | ,000             | ,000  | ,000  |
|                              | 7 sjunde sjundedelen | 2135      | ,000             | ,000  | ,000  |

## Categorical Variables Codings

|                              |                      | Parameter coding |       |       |
|------------------------------|----------------------|------------------|-------|-------|
|                              |                      | (4)              | (5)   | (6)   |
| sv7 sjättedelar för standard | 1 fjärde sjundedelen | ,000             | ,000  | ,000  |
|                              | 2 första sjundedelen | ,000             | ,000  | ,000  |
|                              | 3 andra sjundedelen  | ,000             | ,000  | ,000  |
|                              | 4 tredje sjundedelen | ,000             | ,000  | ,000  |
|                              | 5 femte sjundedelen  | 1,000            | ,000  | ,000  |
|                              | 6 sjätte sjundedelen | ,000             | 1,000 | ,000  |
|                              | 7 sjunde sjundedelen | ,000             | ,000  | 1,000 |

## Block 0: Beginning Block

Classification Table<sup>a,b</sup>

| Observed           |                              |                     | Predicted                    |                     |
|--------------------|------------------------------|---------------------|------------------------------|---------------------|
|                    |                              |                     | hand01 händelse nej eller ja |                     |
|                    |                              |                     | 0 ingen händelse             | 1 minst en händelse |
| Step 0             | hand01 händelse nej eller ja | 0 ingen händelse    | 11108                        | 0                   |
|                    |                              | 1 minst en händelse | 1367                         | 0                   |
| Overall Percentage |                              |                     |                              |                     |

Classification Table<sup>a,b</sup>

| Observed           |                              |                     | Predicted          |
|--------------------|------------------------------|---------------------|--------------------|
|                    |                              |                     | Percentage Correct |
| Step 0             | hand01 händelse nej eller ja | 0 ingen händelse    | 100,0              |
|                    |                              | 1 minst en händelse | ,0                 |
| Overall Percentage |                              |                     | 89,0               |

a. Constant is included in the model.

b. The cut value is ,500

#### Variables in the Equation

|                 | B      | S.E. | Wald     | df | Sig. | Exp(B) |
|-----------------|--------|------|----------|----|------|--------|
| Step 0 Constant | -2,095 | ,029 | 5342,584 | 1  | ,000 | ,123   |

#### Variables not in the Equation

|                      | Score  | df | Sig. |
|----------------------|--------|----|------|
| Step 0 Variables sv7 | 43,959 | 6  | ,000 |
| sv7(1)               | 36,287 | 1  | ,000 |
| sv7(2)               | ,199   | 1  | ,655 |
| sv7(3)               | ,113   | 1  | ,737 |
| sv7(4)               | ,601   | 1  | ,438 |
| sv7(5)               | 10,247 | 1  | ,001 |
| sv7(6)               | 5,949  | 1  | ,015 |
| Overall Statistics   | 43,959 | 6  | ,000 |

### Block 1: Method = Enter

#### Omnibus Tests of Model Coefficients

|             | Chi-square | df | Sig. |
|-------------|------------|----|------|
| Step 1 Step | 45,807     | 6  | ,000 |
| Block       | 45,807     | 6  | ,000 |
| Model       | 45,807     | 6  | ,000 |

#### Model Summary

| Step | -2 Log likelihood     | Cox & Snell R Square | Nagelkerke R Square |
|------|-----------------------|----------------------|---------------------|
| 1    | 8577,776 <sup>a</sup> | ,004                 | ,007                |

a. Estimation terminated at iteration number 5 because parameter estimates changed by less than ,001.

#### Classification Table<sup>a</sup>

|                    |                                     | Predicted                    |                     |
|--------------------|-------------------------------------|------------------------------|---------------------|
|                    |                                     | hand01 hændelse nej eller ja |                     |
| Observed           |                                     | 0 ingen hændelse             | 1 minst en hændelse |
|                    | Step 1 hand01 hændelse nej eller ja | 0 ingen hændelse             | 11108               |
|                    | 1 minst en hændelse                 | 1367                         | 0                   |
| Overall Percentage |                                     |                              |                     |

Classification Table<sup>a</sup>

| Observed           |                              |                     | Predicted |                    |
|--------------------|------------------------------|---------------------|-----------|--------------------|
|                    |                              |                     |           | Percentage Correct |
| Step 1             | hand01 händelse nej eller ja | 0 ingen händelse    | 100,0     |                    |
|                    |                              | 1 minst en händelse | ,0        |                    |
| Overall Percentage |                              |                     | 89,0      |                    |

a. The cut value is ,500

Variables in the Equation

|                     |          | B      | S.E. | Wald    | df | Sig. | Exp(B) | 95% C.I.<br>Lower |
|---------------------|----------|--------|------|---------|----|------|--------|-------------------|
| Step 1 <sup>a</sup> | sv7      |        |      | 43,366  | 6  | ,000 |        |                   |
|                     | sv7(1)   | -,467  | ,105 | 19,690  | 1  | ,000 | ,627   | ,510              |
|                     | sv7(2)   | -,157  | ,123 | 1,622   | 1  | ,203 | ,855   | ,672              |
|                     | sv7(3)   | -,147  | ,122 | 1,438   | 1  | ,231 | ,864   | ,680              |
|                     | sv7(4)   | -,057  | ,116 | ,247    | 1  | ,619 | ,944   | ,753              |
|                     | sv7(5)   | ,080   | ,105 | ,578    | 1  | ,447 | 1,083  | ,881              |
|                     | sv7(6)   | ,028   | ,104 | ,072    | 1  | ,789 | 1,028  | ,838              |
|                     | Constant | -1,978 | ,081 | 594,335 | 1  | ,000 | ,138   |                   |

Variables in the Equation

|                     |          | 95% C.I....<br>Upper |
|---------------------|----------|----------------------|
| Step 1 <sup>a</sup> | sv7      |                      |
|                     | sv7(1)   | ,771                 |
|                     | sv7(2)   | 1,088                |
|                     | sv7(3)   | 1,097                |
|                     | sv7(4)   | 1,184                |
|                     | sv7(5)   | 1,332                |
|                     | sv7(6)   | 1,262                |
|                     | Constant |                      |

a. Variable(s) entered on step 1: sv7.

\*\*

```
LOGISTIC REGRESSION VARIABLES luonnelt1
/METHOD=ENTER bv1
/CONTRAST (bv1)=Indicator(1)
/PRINT=CI(95)
/CRITERIA=PIN(0.05) POUT(0.10) ITERATE(20) CUT(0.5).
```

## Logistic Regression

[DataSet6] C:\cWordjan\Rafaela\_VCS\alla\_tillsammans\abo\_bjo\_vasa\_v1.sav

### Case Processing Summary

| Unweighted Cases <sup>a</sup> |                      | N     | Percent |
|-------------------------------|----------------------|-------|---------|
| Selected Cases                | Included in Analysis | 12475 | 100,0   |
|                               | Missing Cases        | 0     | ,0      |
|                               | Total                | 12475 | 100,0   |
| Unselected Cases              |                      | 0     | ,0      |
| Total                         |                      | 12475 | 100,0   |

a. If weight is in effect, see classification table for the total number of cases.

### Dependent Variable Encoding

| Original Value                      | Internal Value |
|-------------------------------------|----------------|
| 0 ingen händelse eller läheltä piti | 0              |
| 1 tapahtui potilaalle               | 1              |

### Categorical Variables Codings

|                           |                   | Frequency | Parameter coding |       |
|---------------------------|-------------------|-----------|------------------|-------|
|                           |                   |           | (1)              | (2)   |
| bv1 belastning vs paencil | 1 medelbelastning | 5380      | ,000             | ,000  |
|                           | 2 underbelastning | 3222      | 1,000            | ,000  |
|                           | 3 överbelastning  | 3873      | ,000             | 1,000 |

## Block 0: Beginning Block

### Classification Table<sup>a,b</sup>

| Observed           |                                                |                                                              |
|--------------------|------------------------------------------------|--------------------------------------------------------------|
| Step 0             | luonnelt1 luonne highest = tapahtui potilaalle | 0 ingen händelse eller läheltä piti<br>1 tapahtui potilaalle |
| Overall Percentage |                                                |                                                              |

**Classification Table<sup>a,b</sup>**

| Observed           |                                                |                                     | Predicted                      |                                     |
|--------------------|------------------------------------------------|-------------------------------------|--------------------------------|-------------------------------------|
|                    |                                                |                                     | luonnelt1 luonne highest = ... | 0 ingen händelse eller läheltä piti |
| Step 0             | luonnelt1 luonne highest = tapahtui potilaalle | 0 ingen händelse eller läheltä piti | 11627                          |                                     |
|                    |                                                | 1 tapahtui potilaalle               | 848                            |                                     |
| Overall Percentage |                                                |                                     |                                |                                     |

**Classification Table<sup>a,b</sup>**

| Observed           |                                                |                                     | Predicted                    |                       |
|--------------------|------------------------------------------------|-------------------------------------|------------------------------|-----------------------|
|                    |                                                |                                     | luonnelt1 luonne highest ... | 1 tapahtui potilaalle |
| Step 0             | luonnelt1 luonne highest = tapahtui potilaalle | 0 ingen händelse eller läheltä piti | 0                            |                       |
|                    |                                                | 1 tapahtui potilaalle               | 0                            |                       |
| Overall Percentage |                                                |                                     |                              |                       |

**Classification Table<sup>a,b</sup>**

| Observed           |                                                |                                     | Predicted          |  |
|--------------------|------------------------------------------------|-------------------------------------|--------------------|--|
|                    |                                                |                                     | Percentage Correct |  |
| Step 0             | luonnelt1 luonne highest = tapahtui potilaalle | 0 ingen händelse eller läheltä piti | 100,0              |  |
|                    |                                                | 1 tapahtui potilaalle               | ,0                 |  |
| Overall Percentage |                                                |                                     | 93,2               |  |

a. Constant is included in the model.

b. The cut value is ,500

**Variables in the Equation**

|                 | B      | S.E. | Wald     | df | Sig. | Exp(B) |
|-----------------|--------|------|----------|----|------|--------|
| Step 0 Constant | -2,618 | ,036 | 5417,889 | 1  | ,000 | ,073   |

**Variables not in the Equation**

|                    | Score  | df | Sig. |
|--------------------|--------|----|------|
| Step 0 Variables   |        |    |      |
| bv1                | 26,218 | 2  | ,000 |
| bv1(1)             | 23,791 | 1  | ,000 |
| bv1(2)             | 11,302 | 1  | ,001 |
| Overall Statistics | 26,218 | 2  | ,000 |

**Block 1: Method = Enter****Omnibus Tests of Model Coefficients**

|        |       | Chi-square | df | Sig. |
|--------|-------|------------|----|------|
| Step 1 | Step  | 27,580     | 2  | ,000 |
|        | Block | 27,580     | 2  | ,000 |
|        | Model | 27,580     | 2  | ,000 |

**Model Summary**

| Step | -2 Log likelihood     | Cox & Snell R Square | Nagelkerke R Square |
|------|-----------------------|----------------------|---------------------|
| 1    | 6169,292 <sup>a</sup> | ,002                 | ,006                |

a. Estimation terminated at iteration number 6 because parameter estimates changed by less than ,001.

**Classification Table<sup>a</sup>**

|        |                                                | Observed                                                     |  |
|--------|------------------------------------------------|--------------------------------------------------------------|--|
| Step 1 | luonnelt1 luonne highest = tapahtui potilaalle | 0 ingen händelse eller läheltä piti<br>1 tapahtui potilaalle |  |
|        |                                                | Overall Percentage                                           |  |

**Classification Table<sup>a</sup>**

|        |                                                | Predicted                                                    |              |
|--------|------------------------------------------------|--------------------------------------------------------------|--------------|
|        |                                                | luonnelt1 luonne highest = ...                               |              |
|        |                                                | 0 ingen händelse eller läheltä piti                          |              |
| Step 1 | luonnelt1 luonne highest = tapahtui potilaalle | 0 ingen händelse eller läheltä piti<br>1 tapahtui potilaalle | 11627<br>848 |
|        |                                                | Overall Percentage                                           |              |

Classification Table<sup>a</sup>

| Observed           |                                                | Predicted                           |   |
|--------------------|------------------------------------------------|-------------------------------------|---|
|                    |                                                |                                     |   |
| Step 1             | luonnelt1 luonne highest = tapahtui potilaalle | 0 ingen händelse eller läheltä piti | 0 |
|                    |                                                | 1 tapahtui potilaalle               | 0 |
| Overall Percentage |                                                |                                     |   |

Classification Table<sup>a</sup>

| Observed           |                                                | Predicted                           |       |
|--------------------|------------------------------------------------|-------------------------------------|-------|
|                    |                                                |                                     |       |
| Step 1             | luonnelt1 luonne highest = tapahtui potilaalle | 0 ingen händelse eller läheltä piti | 100,0 |
|                    |                                                | 1 tapahtui potilaalle               | ,0    |
| Overall Percentage |                                                |                                     | 93,2  |

a. The cut value is ,500

Variables in the Equation

|                         | B      | S.E. | Wald     | df | Sig. | Exp(B) | 95% C.I.. |       |
|-------------------------|--------|------|----------|----|------|--------|-----------|-------|
|                         |        |      |          |    |      |        | Lower     | Upper |
| Step 1 <sup>a</sup> bv1 |        |      | 25,846   | 2  | ,000 |        |           |       |
|                         | -,387  | ,097 | 15,866   | 1  | ,000 | ,679   | ,561      |       |
|                         | ,119   | ,080 | 2,229    | 1  | ,135 | 1,126  | ,963      |       |
| Constant                | -2,571 | ,053 | 2346,429 | 1  | ,000 | ,076   |           |       |

Variables in the Equation

|                         |          | 95% C.I.... |
|-------------------------|----------|-------------|
|                         |          | Upper       |
| Step 1 <sup>a</sup> bv1 |          |             |
|                         | bv1(1)   | ,822        |
|                         | bv1(2)   | 1,317       |
|                         | Constant |             |

a. Variable(s) entered on step 1: bv1.

```
LOGISTIC REGRESSION VARIABLES luonnelt1
/METHOD=ENTER bv2
/CONTRAST (bv2)=Indicator(1)
/PRINT=CI(95)
/CRITERIA=PIN(0.05) POUT(0.10) ITERATE(20) CUT(0.5).
```

## Logistic Regression

[DataSet6] C:\cWordjan\Rafaela\_VCS\alla\_tillsammans\abo\_bjo\_vasa\_v1.sav

### Case Processing Summary

| Unweighted Cases <sup>a</sup> |                      | N     | Percent |
|-------------------------------|----------------------|-------|---------|
| Selected Cases                | Included in Analysis | 12475 | 100,0   |
|                               | Missing Cases        | 0     | ,0      |
|                               | Total                | 12475 | 100,0   |
| Unselected Cases              |                      | 0     | ,0      |
| Total                         |                      | 12475 | 100,0   |

a. If weight is in effect, see classification table for the total number of cases.

### Dependent Variable Encoding

| Original Value                      | Internal Value |
|-------------------------------------|----------------|
| 0 ingen händelse eller läheltä piti | 0              |
| 1 tapahtui potilaalle               | 1              |

### Categorical Variables Codings

|                                             |                   | Frequency | Parameter coding |       |
|---------------------------------------------|-------------------|-----------|------------------|-------|
|                                             |                   |           | (1)              | (2)   |
| bv2 belastning vs paencil halva intervallet | 1 medelbelastning | 2788      | ,000             | ,000  |
|                                             | 2 underbelastning | 4419      | 1,000            | ,000  |
|                                             | 3 överbelastning  | 5268      | ,000             | 1,000 |

## Block 0: Beginning Block

### Classification Table<sup>a,b</sup>

| Observed           |                                                | Expected                            |                       |
|--------------------|------------------------------------------------|-------------------------------------|-----------------------|
| Step 0             | luonnelt1 luonne highest = tapahtui potilaalle | 0 ingen händelse eller läheltä piti | 1 tapahtui potilaalle |
| Overall Percentage |                                                |                                     |                       |



**Classification Table<sup>a,b</sup>**

| Observed           |                                                |                                     | Predicted                      |                                     |
|--------------------|------------------------------------------------|-------------------------------------|--------------------------------|-------------------------------------|
|                    |                                                |                                     | luonnelt1 luonne highest = ... | 0 ingen händelse eller läheltä piti |
| Step 0             | luonnelt1 luonne highest = tapahtui potilaalle | 0 ingen händelse eller läheltä piti | 11627                          |                                     |
|                    |                                                | 1 tapahtui potilaalle               | 848                            |                                     |
| Overall Percentage |                                                |                                     |                                |                                     |

**Classification Table<sup>a,b</sup>**

| Observed           |                                                |                                     | Predicted                    |                       |
|--------------------|------------------------------------------------|-------------------------------------|------------------------------|-----------------------|
|                    |                                                |                                     | luonnelt1 luonne highest ... | 1 tapahtui potilaalle |
| Step 0             | luonnelt1 luonne highest = tapahtui potilaalle | 0 ingen händelse eller läheltä piti | 0                            |                       |
|                    |                                                | 1 tapahtui potilaalle               | 0                            |                       |
| Overall Percentage |                                                |                                     |                              |                       |

**Classification Table<sup>a,b</sup>**

| Observed           |                                                |                                     | Predicted          |  |
|--------------------|------------------------------------------------|-------------------------------------|--------------------|--|
|                    |                                                |                                     | Percentage Correct |  |
| Step 0             | luonnelt1 luonne highest = tapahtui potilaalle | 0 ingen händelse eller läheltä piti | 100,0              |  |
|                    |                                                | 1 tapahtui potilaalle               | ,0                 |  |
| Overall Percentage |                                                |                                     | 93,2               |  |

a. Constant is included in the model.

b. The cut value is ,500

**Variables in the Equation**

|                 | B      | S.E. | Wald     | df | Sig. | Exp(B) |
|-----------------|--------|------|----------|----|------|--------|
| Step 0 Constant | -2,618 | ,036 | 5417,889 | 1  | ,000 | ,073   |

**Variables not in the Equation**

|                    | Score  | df | Sig. |
|--------------------|--------|----|------|
| Step 0 Variables   |        |    |      |
| bv2                | 20,768 | 2  | ,000 |
| bv2(1)             | 19,506 | 1  | ,000 |
| bv2(2)             | 13,438 | 1  | ,000 |
| Overall Statistics | 20,768 | 2  | ,000 |

**Block 1: Method = Enter****Omnibus Tests of Model Coefficients**

|        |       | Chi-square | df | Sig. |
|--------|-------|------------|----|------|
| Step 1 | Step  | 21,300     | 2  | ,000 |
|        | Block | 21,300     | 2  | ,000 |
|        | Model | 21,300     | 2  | ,000 |

**Model Summary**

| Step | -2 Log likelihood     | Cox & Snell R Square | Nagelkerke R Square |
|------|-----------------------|----------------------|---------------------|
| 1    | 6175,572 <sup>a</sup> | ,002                 | ,004                |

a. Estimation terminated at iteration number 5 because parameter estimates changed by less than ,001.

**Classification Table<sup>a</sup>**

| Observed           |                                                |                                                              |  |
|--------------------|------------------------------------------------|--------------------------------------------------------------|--|
| Step 1             | luonnelt1 luonne highest = tapahtui potilaalle | 0 ingen händelse eller läheltä piti<br>1 tapahtui potilaalle |  |
| Overall Percentage |                                                |                                                              |  |

**Classification Table<sup>a</sup>**

| Observed           |                                                | Predicted                                                    |              |
|--------------------|------------------------------------------------|--------------------------------------------------------------|--------------|
|                    |                                                | luonnelt1 luonne highest = ...                               |              |
|                    |                                                | 0 ingen händelse eller läheltä piti                          |              |
| Step 1             | luonnelt1 luonne highest = tapahtui potilaalle | 0 ingen händelse eller läheltä piti<br>1 tapahtui potilaalle | 11627<br>848 |
| Overall Percentage |                                                |                                                              |              |

Classification Table<sup>a</sup>

| Observed           |                                                | Predicted                           |                          |
|--------------------|------------------------------------------------|-------------------------------------|--------------------------|
|                    |                                                | luonnelt1<br>luonne highest ...     | 1 tapahtui<br>potilaalle |
| Step 1             | luonnelt1 luonne highest = tapahtui potilaalle | 0 ingen händelse eller läheltä piti | 0                        |
|                    |                                                | 1 tapahtui potilaalle               | 0                        |
| Overall Percentage |                                                |                                     |                          |

Classification Table<sup>a</sup>

| Observed           |                                                | Predicted                           |       |
|--------------------|------------------------------------------------|-------------------------------------|-------|
|                    |                                                | Percentage Correct                  |       |
| Step 1             | luonnelt1 luonne highest = tapahtui potilaalle | 0 ingen händelse eller läheltä piti | 100,0 |
|                    |                                                | 1 tapahtui potilaalle               | ,0    |
| Overall Percentage |                                                |                                     | 93,2  |

a. The cut value is ,500

Variables in the Equation

|                         | B      | S.E. | Wald     | df | Sig. | Exp(B) | 95% C.I.. |       |
|-------------------------|--------|------|----------|----|------|--------|-----------|-------|
|                         |        |      |          |    |      |        | Lower     | Upper |
| Step 1 <sup>a</sup> bv2 |        |      | 20,588   | 2  | ,000 |        |           |       |
|                         | -,282  | ,099 | 8,073    | 1  | ,004 | ,755   | ,621      |       |
|                         | ,096   | ,090 | 1,146    | 1  | ,284 | 1,101  | ,923      |       |
| Constant                | -2,571 | ,074 | 1215,978 | 1  | ,000 | ,076   |           |       |

Variables in the Equation

|                         |          | 95% C.I.... |
|-------------------------|----------|-------------|
|                         |          | Upper       |
| Step 1 <sup>a</sup> bv2 |          |             |
|                         | bv2(1)   | ,916        |
|                         | bv2(2)   | 1,313       |
|                         | Constant |             |

a. Variable(s) entered on step 1: bv2.

```
LOGISTIC REGRESSION VARIABLES luonnelt1
/METHOD=ENTER bv3
/CONTRAST (bv3)=Indicator(1)
/PRINT=CI(95)
/CRITERIA=PIN(0.05) POUT(0.10) ITERATE(20) CUT(0.5).
```

## Logistic Regression

[DataSet6] C:\cWordjan\Rafaela\_VCS\alla\_tillsammans\abo\_bjo\_vasa\_v1.sav

### Case Processing Summary

| Unweighted Cases <sup>a</sup> |                      | N     | Percent |
|-------------------------------|----------------------|-------|---------|
| Selected Cases                | Included in Analysis | 12475 | 100,0   |
|                               | Missing Cases        | 0     | ,0      |
|                               | Total                | 12475 | 100,0   |
| Unselected Cases              |                      | 0     | ,0      |
| Total                         |                      | 12475 | 100,0   |

a. If weight is in effect, see classification table for the total number of cases.

### Dependent Variable Encoding

| Original Value                      | Internal Value |
|-------------------------------------|----------------|
| 0 ingen händelse eller läheltä piti | 0              |
| 1 tapahtui potilaalle               | 1              |

### Categorical Variables Codings

|                                              |                   | Frequency | Parameter coding |       |
|----------------------------------------------|-------------------|-----------|------------------|-------|
|                                              |                   |           | (1)              | (2)   |
| bv3 belasnting vs paencil dubbla intervallet | 1 medelbelastning | 9121      | ,000             | ,000  |
|                                              | 2 underbelastning | 1505      | 1,000            | ,000  |
|                                              | 3 överbelastning  | 1849      | ,000             | 1,000 |

## Block 0: Beginning Block

### Classification Table<sup>a,b</sup>

| Observed           |                                                | Expected                            |                       |
|--------------------|------------------------------------------------|-------------------------------------|-----------------------|
| Step 0             | luonnelt1 luonne highest = tapahtui potilaalle | 0 ingen händelse eller läheltä piti | 1 tapahtui potilaalle |
| Overall Percentage |                                                |                                     |                       |

**Classification Table<sup>a,b</sup>**

| Observed           |                                                |                                     | Predicted                      |                                     |
|--------------------|------------------------------------------------|-------------------------------------|--------------------------------|-------------------------------------|
|                    |                                                |                                     | luonnelt1 luonne highest = ... | 0 ingen händelse eller läheltä piti |
| Step 0             | luonnelt1 luonne highest = tapahtui potilaalle | 0 ingen händelse eller läheltä piti | 11627                          |                                     |
|                    |                                                | 1 tapahtui potilaalle               | 848                            |                                     |
| Overall Percentage |                                                |                                     |                                |                                     |

**Classification Table<sup>a,b</sup>**

| Observed           |                                                |                                     | Predicted                    |                       |
|--------------------|------------------------------------------------|-------------------------------------|------------------------------|-----------------------|
|                    |                                                |                                     | luonnelt1 luonne highest ... | 1 tapahtui potilaalle |
| Step 0             | luonnelt1 luonne highest = tapahtui potilaalle | 0 ingen händelse eller läheltä piti | 0                            |                       |
|                    |                                                | 1 tapahtui potilaalle               | 0                            |                       |
| Overall Percentage |                                                |                                     |                              |                       |

**Classification Table<sup>a,b</sup>**

| Observed           |                                                |                                     | Predicted          |  |
|--------------------|------------------------------------------------|-------------------------------------|--------------------|--|
|                    |                                                |                                     | Percentage Correct |  |
| Step 0             | luonnelt1 luonne highest = tapahtui potilaalle | 0 ingen händelse eller läheltä piti | 100,0              |  |
|                    |                                                | 1 tapahtui potilaalle               | ,0                 |  |
| Overall Percentage |                                                |                                     | 93,2               |  |

a. Constant is included in the model.

b. The cut value is ,500

**Variables in the Equation**

|                 | B      | S.E. | Wald     | df | Sig. | Exp(B) |
|-----------------|--------|------|----------|----|------|--------|
| Step 0 Constant | -2,618 | ,036 | 5417,889 | 1  | ,000 | ,073   |

**Variables not in the Equation**

|                      | Score  | df | Sig. |
|----------------------|--------|----|------|
| Step 0 Variables bv3 | 19,905 | 2  | ,000 |
|                      | bv3(1) | 1  | ,000 |
|                      | bv3(2) | 1  | ,008 |
| Overall Statistics   | 19,905 | 2  | ,000 |

**Block 1: Method = Enter****Omnibus Tests of Model Coefficients**

|        |       | Chi-square | df | Sig. |
|--------|-------|------------|----|------|
| Step 1 | Step  | 21,420     | 2  | ,000 |
|        | Block | 21,420     | 2  | ,000 |
|        | Model | 21,420     | 2  | ,000 |

**Model Summary**

| Step | -2 Log likelihood     | Cox & Snell R Square | Nagelkerke R Square |
|------|-----------------------|----------------------|---------------------|
| 1    | 6175,452 <sup>a</sup> | ,002                 | ,004                |

a. Estimation terminated at iteration number 6 because parameter estimates changed by less than ,001.

**Classification Table<sup>a</sup>**

| Observed           |                                                |                                     |                       |
|--------------------|------------------------------------------------|-------------------------------------|-----------------------|
| Step 1             | luonnelt1 luonne highest = tapahtui potilaalle | 0 ingen händelse eller läheltä piti | 1 tapahtui potilaalle |
| Overall Percentage |                                                |                                     |                       |

**Classification Table<sup>a</sup>**

| Observed           |                                                | Predicted                           |       |
|--------------------|------------------------------------------------|-------------------------------------|-------|
|                    |                                                | luonnelt1 luonne highest = ...      |       |
|                    |                                                | 0 ingen händelse eller läheltä piti |       |
| Step 1             | luonnelt1 luonne highest = tapahtui potilaalle | 0 ingen händelse eller läheltä piti | 11627 |
|                    |                                                | 1 tapahtui potilaalle               | 848   |
| Overall Percentage |                                                |                                     |       |

Classification Table<sup>a</sup>

| Observed           |                                                | Predicted                                                    |                          |
|--------------------|------------------------------------------------|--------------------------------------------------------------|--------------------------|
|                    |                                                | luonnelt1<br>luonne highest ...                              | 1 tapahtui<br>potilaalle |
| Step 1             | luonnelt1 luonne highest = tapahtui potilaalle | 0 ingen händelse eller läheltä piti<br>1 tapahtui potilaalle | 0<br>0                   |
| Overall Percentage |                                                |                                                              |                          |

Classification Table<sup>a</sup>

| Observed           |                                                | Predicted                                                    |             |
|--------------------|------------------------------------------------|--------------------------------------------------------------|-------------|
|                    |                                                | Percentage Correct                                           |             |
| Step 1             | luonnelt1 luonne highest = tapahtui potilaalle | 0 ingen händelse eller läheltä piti<br>1 tapahtui potilaalle | 100,0<br>,0 |
| Overall Percentage |                                                |                                                              | 93,2        |

a. The cut value is ,500

Variables in the Equation

|                         | B      | S.E. | Wald     | df | Sig. | Exp(B) | 95% C.I.. |       |
|-------------------------|--------|------|----------|----|------|--------|-----------|-------|
|                         |        |      |          |    |      |        | Lower     | Upper |
| Step 1 <sup>a</sup> bv3 |        |      | 19,526   | 2  | ,000 |        |           |       |
| bv3(1)                  | -,481  | ,132 | 13,182   | 1  | ,000 | ,618   |           | ,477  |
| bv3(2)                  | ,188   | ,094 | 3,996    | 1  | ,046 | 1,207  |           | 1,004 |
| Constant                | -2,601 | ,041 | 3967,818 | 1  | ,000 | ,074   |           |       |

Variables in the Equation

|                         | 95% C.I.... |       |
|-------------------------|-------------|-------|
|                         | Upper       |       |
| Step 1 <sup>a</sup> bv3 |             |       |
| bv3(1)                  |             | ,801  |
| bv3(2)                  |             | 1,452 |
| Constant                |             |       |

a. Variable(s) entered on step 1: bv3.

```
LOGISTIC REGRESSION VARIABLES luonnelt1
/METHOD=ENTER sv3
/CONTRAST (sv3)=Indicator(1)
/PRINT=CI(95)
/CRITERIA=PIN(0.05) POUT(0.10) ITERATE(20) CUT(0.5).
```

## Logistic Regression

[DataSet6] C:\cWordjan\Rafaela\_VCS\alla\_tillsammans\abo\_bjo\_vasa\_v1.sav

### Case Processing Summary

| Unweighted Cases <sup>a</sup> |                      | N     | Percent |
|-------------------------------|----------------------|-------|---------|
| Selected Cases                | Included in Analysis | 12475 | 100,0   |
|                               | Missing Cases        | 0     | ,0      |
|                               | Total                | 12475 | 100,0   |
| Unselected Cases              |                      | 0     | ,0      |
| Total                         |                      | 12475 | 100,0   |

a. If weight is in effect, see classification table for the total number of cases.

### Dependent Variable Encoding

| Original Value                      | Internal Value |
|-------------------------------------|----------------|
| 0 ingen händelse eller läheltä piti | 0              |
| 1 tapahtui potilaalle               | 1              |

### Categorical Variables Codings

|                              |                      | Frequency | Parameter coding |       |
|------------------------------|----------------------|-----------|------------------|-------|
|                              |                      |           | (1)              | (2)   |
| sv3 tredjedelar för standard | 1 andra tredjedelen  | 3172      | ,000             | ,000  |
|                              | 2 första tredjedelen | 4718      | 1,000            | ,000  |
|                              | 3 tredje tredjedelen | 4585      | ,000             | 1,000 |

## Block 0: Beginning Block

### Classification Table<sup>a,b</sup>

| Observed           |                                                | Expected                            |                       |
|--------------------|------------------------------------------------|-------------------------------------|-----------------------|
| Step 0             | luonnelt1 luonne highest = tapahtui potilaalle | 0 ingen händelse eller läheltä piti | 1 tapahtui potilaalle |
| Overall Percentage |                                                |                                     |                       |



Classification Table<sup>a,b</sup>

| Observed           |                                                |                                     | Predicted                      |                                     |
|--------------------|------------------------------------------------|-------------------------------------|--------------------------------|-------------------------------------|
|                    |                                                |                                     | luonnelt1 luonne highest = ... | 0 ingen händelse eller läheltä piti |
| Step 0             | luonnelt1 luonne highest = tapahtui potilaalle | 0 ingen händelse eller läheltä piti | 11627                          |                                     |
|                    |                                                | 1 tapahtui potilaalle               | 848                            |                                     |
| Overall Percentage |                                                |                                     |                                |                                     |

Classification Table<sup>a,b</sup>

| Observed           |                                                |                                     | Predicted                    |                       |
|--------------------|------------------------------------------------|-------------------------------------|------------------------------|-----------------------|
|                    |                                                |                                     | luonnelt1 luonne highest ... | 1 tapahtui potilaalle |
| Step 0             | luonnelt1 luonne highest = tapahtui potilaalle | 0 ingen händelse eller läheltä piti | 0                            |                       |
|                    |                                                | 1 tapahtui potilaalle               | 0                            |                       |
| Overall Percentage |                                                |                                     |                              |                       |

Classification Table<sup>a,b</sup>

| Observed           |                                                |                                     | Predicted          |  |
|--------------------|------------------------------------------------|-------------------------------------|--------------------|--|
|                    |                                                |                                     | Percentage Correct |  |
| Step 0             | luonnelt1 luonne highest = tapahtui potilaalle | 0 ingen händelse eller läheltä piti | 100,0              |  |
|                    |                                                | 1 tapahtui potilaalle               | ,0                 |  |
| Overall Percentage |                                                |                                     | 93,2               |  |

a. Constant is included in the model.

b. The cut value is ,500

## Variables in the Equation

|                 | B      | S.E. | Wald     | df | Sig. | Exp(B) |
|-----------------|--------|------|----------|----|------|--------|
| Step 0 Constant | -2,618 | ,036 | 5417,889 | 1  | ,000 | ,073   |

## Variables not in the Equation

|                      | Score  | df | Sig. |
|----------------------|--------|----|------|
| Step 0 Variables sv3 | 16,006 | 2  | ,000 |
| sv3(1)               | 12,247 | 1  | ,000 |
| sv3(2)               | 13,246 | 1  | ,000 |
| Overall Statistics   | 16,006 | 2  | ,000 |

**Block 1: Method = Enter****Omnibus Tests of Model Coefficients**

|        |       | Chi-square | df | Sig. |
|--------|-------|------------|----|------|
| Step 1 | Step  | 16,005     | 2  | ,000 |
|        | Block | 16,005     | 2  | ,000 |
|        | Model | 16,005     | 2  | ,000 |

**Model Summary**

| Step | -2 Log likelihood     | Cox & Snell R Square | Nagelkerke R Square |
|------|-----------------------|----------------------|---------------------|
| 1    | 6180,867 <sup>a</sup> | ,001                 | ,003                |

a. Estimation terminated at iteration number 5 because parameter estimates changed by less than ,001.

**Classification Table<sup>a</sup>**

| Observed           |                                                |                                     |                       |
|--------------------|------------------------------------------------|-------------------------------------|-----------------------|
| Step 1             | luonnelt1 luonne highest = tapahtui potilaalle | 0 ingen händelse eller läheltä piti | 1 tapahtui potilaalle |
| Overall Percentage |                                                |                                     |                       |

**Classification Table<sup>a</sup>**

| Observed           |                                                | Predicted                           |       |
|--------------------|------------------------------------------------|-------------------------------------|-------|
|                    |                                                | luonnelt1 luonne highest = ...      |       |
|                    |                                                | 0 ingen händelse eller läheltä piti |       |
| Step 1             | luonnelt1 luonne highest = tapahtui potilaalle | 0 ingen händelse eller läheltä piti | 11627 |
|                    |                                                | 1 tapahtui potilaalle               | 848   |
| Overall Percentage |                                                |                                     |       |

Classification Table<sup>a</sup>

| Observed           |                                                |                                                              | Predicted                       |                          |
|--------------------|------------------------------------------------|--------------------------------------------------------------|---------------------------------|--------------------------|
|                    |                                                |                                                              | luonnelt1<br>luonne highest ... | 1 tapahtui<br>potilaalle |
| Step 1             | luonnelt1 luonne highest = tapahtui potilaalle | 0 ingen händelse eller läheltä piti<br>1 tapahtui potilaalle | 0                               | 0                        |
| Overall Percentage |                                                |                                                              |                                 |                          |

Classification Table<sup>a</sup>

| Observed           |                                                |                                                              | Predicted             |    |
|--------------------|------------------------------------------------|--------------------------------------------------------------|-----------------------|----|
|                    |                                                |                                                              | Percentage<br>Correct |    |
| Step 1             | luonnelt1 luonne highest = tapahtui potilaalle | 0 ingen händelse eller läheltä piti<br>1 tapahtui potilaalle | 100,0                 | ,0 |
| Overall Percentage |                                                |                                                              | 93,2                  |    |

a. The cut value is ,500

Variables in the Equation

|                         | B      | S.E. | Wald     | df | Sig. | Exp(B) | 95% C.I.. |       |
|-------------------------|--------|------|----------|----|------|--------|-----------|-------|
|                         |        |      |          |    |      |        | Lower     | Upper |
| Step 1 <sup>a</sup> sv3 |        |      | 15,909   | 2  | ,000 |        |           |       |
| sv3(1)                  | -,164  | ,094 | 3,014    | 1  | ,083 | ,849   | ,706      |       |
| sv3(2)                  | ,167   | ,090 | 3,463    | 1  | ,063 | 1,181  | ,991      |       |
| Constant                | -2,626 | ,071 | 1376,464 | 1  | ,000 | ,072   |           |       |

Variables in the Equation

|                         | 95% C.I.... |       |
|-------------------------|-------------|-------|
|                         | Upper       | Lower |
| Step 1 <sup>a</sup> sv3 |             |       |
| sv3(1)                  | 1,021       |       |
| sv3(2)                  | 1,408       |       |
| Constant                |             |       |

a. Variable(s) entered on step 1: sv3.

```
LOGISTIC REGRESSION VARIABLES luonnelt1
/METHOD=ENTER sv5
/CONTRAST (sv5)=Indicator(1)
/PRINT=CI(95)
/CRITERIA=PIN(0.05) POUT(0.10) ITERATE(20) CUT(0.5).
```

## Logistic Regression

[DataSet6] C:\cWordjan\Rafaela\_VCS\alla\_tillsammans\abo\_bjo\_vasa\_v1.sav

### Case Processing Summary

| Unweighted Cases <sup>a</sup> |                      | N     | Percent |
|-------------------------------|----------------------|-------|---------|
| Selected Cases                | Included in Analysis | 12475 | 100,0   |
|                               | Missing Cases        | 0     | ,0      |
|                               | Total                | 12475 | 100,0   |
| Unselected Cases              |                      | 0     | ,0      |
| Total                         |                      | 12475 | 100,0   |

a. If weight is in effect, see classification table for the total number of cases.

### Dependent Variable Encoding

| Original Value                      | Internal Value |
|-------------------------------------|----------------|
| 0 ingen händelse eller läheltä piti | 0              |
| 1 tapahtui potilaalle               | 1              |

### Categorical Variables Codings

|                            |                    | Frequency | Parameter coding |       |       |       |
|----------------------------|--------------------|-----------|------------------|-------|-------|-------|
|                            |                    |           | (1)              | (2)   | (3)   | (4)   |
| sv5 kvintiler för standard | 1 tredje kvintilen | 1863      | ,000             | ,000  | ,000  | ,000  |
|                            | 2 första kvintilen | 3570      | 1,000            | ,000  | ,000  | ,000  |
|                            | 3 andra kvintilen  | 1759      | ,000             | 1,000 | ,000  | ,000  |
|                            | 4 fjärde kvintilen | 2327      | ,000             | ,000  | 1,000 | ,000  |
|                            | 5 femte kvintilen  | 2956      | ,000             | ,000  | ,000  | 1,000 |

## Block 0: Beginning Block

### Classification Table<sup>a,b</sup>

|                    |                                                |                                                              |
|--------------------|------------------------------------------------|--------------------------------------------------------------|
| Observed           |                                                |                                                              |
| Step 0             | luonnelt1 luonne highest = tapahtui potilaalle | 0 ingen händelse eller läheltä piti<br>1 tapahtui potilaalle |
| Overall Percentage |                                                |                                                              |

Classification Table<sup>a,b</sup>

| Observed           |                                                |                                     | Predicted                      |                                     |
|--------------------|------------------------------------------------|-------------------------------------|--------------------------------|-------------------------------------|
|                    |                                                |                                     | luonnelt1 luonne highest = ... | 0 ingen händelse eller läheltä piti |
| Step 0             | luonnelt1 luonne highest = tapahtui potilaalle | 0 ingen händelse eller läheltä piti | 11627                          |                                     |
|                    |                                                | 1 tapahtui potilaalle               | 848                            |                                     |
| Overall Percentage |                                                |                                     |                                |                                     |

Classification Table<sup>a,b</sup>

| Observed           |                                                |                                     | Predicted                    |                       |
|--------------------|------------------------------------------------|-------------------------------------|------------------------------|-----------------------|
|                    |                                                |                                     | luonnelt1 luonne highest ... | 1 tapahtui potilaalle |
| Step 0             | luonnelt1 luonne highest = tapahtui potilaalle | 0 ingen händelse eller läheltä piti | 0                            |                       |
|                    |                                                | 1 tapahtui potilaalle               | 0                            |                       |
| Overall Percentage |                                                |                                     |                              |                       |

Classification Table<sup>a,b</sup>

| Observed           |                                                |                                     | Predicted          |  |
|--------------------|------------------------------------------------|-------------------------------------|--------------------|--|
|                    |                                                |                                     | Percentage Correct |  |
| Step 0             | luonnelt1 luonne highest = tapahtui potilaalle | 0 ingen händelse eller läheltä piti | 100,0              |  |
|                    |                                                | 1 tapahtui potilaalle               | ,0                 |  |
| Overall Percentage |                                                |                                     | 93,2               |  |

a. Constant is included in the model.

b. The cut value is ,500

Variables in the Equation

|                 | B      | S.E. | Wald     | df | Sig. | Exp(B) |
|-----------------|--------|------|----------|----|------|--------|
| Step 0 Constant | -2,618 | ,036 | 5417,889 | 1  | ,000 | ,073   |

## Variables not in the Equation

|        |                    | Score  | df     | Sig. |      |
|--------|--------------------|--------|--------|------|------|
| Step 0 | Variables          | sv5    | 15,331 | 4    | ,004 |
|        |                    | sv5(1) | 10,247 | 1    | ,001 |
|        |                    | sv5(2) | ,767   | 1    | ,381 |
|        |                    | sv5(3) | 1,370  | 1    | ,242 |
|        |                    | sv5(4) | 8,120  | 1    | ,004 |
|        | Overall Statistics |        | 15,331 | 4    | ,004 |

## Block 1: Method = Enter

## Omnibus Tests of Model Coefficients

|        |       | Chi-square | df | Sig. |
|--------|-------|------------|----|------|
| Step 1 | Step  | 15,434     | 4  | ,004 |
|        | Block | 15,434     | 4  | ,004 |
|        | Model | 15,434     | 4  | ,004 |

## Model Summary

| Step | -2 Log likelihood     | Cox & Snell R Square | Nagelkerke R Square |
|------|-----------------------|----------------------|---------------------|
| 1    | 6181,438 <sup>a</sup> | ,001                 | ,003                |

a. Estimation terminated at iteration number 5 because parameter estimates changed by less than ,001.

Classification Table<sup>a</sup>

| Observed           |                                                | Predicted                           |                       |
|--------------------|------------------------------------------------|-------------------------------------|-----------------------|
| Step 1             | luonnelt1 luonne highest = tapahtui potilaalle | 0 ingen händelse eller läheltä piti | 1 tapahtui potilaalle |
| Overall Percentage |                                                |                                     |                       |

Classification Table<sup>a</sup>

| Observed           |                                                | Predicted                           |       |
|--------------------|------------------------------------------------|-------------------------------------|-------|
| Step 1             | luonnelt1 luonne highest = tapahtui potilaalle | 0 ingen händelse eller läheltä piti | 11627 |
|                    |                                                | 1 tapahtui potilaalle               | 848   |
| Overall Percentage |                                                |                                     |       |

Classification Table<sup>a</sup>

| Observed           |                                                | Predicted                                                    |                          |
|--------------------|------------------------------------------------|--------------------------------------------------------------|--------------------------|
|                    |                                                | luonnelt1<br>luonne highest ...                              | 1 tapahtui<br>potilaalle |
| Step 1             | luonnelt1 luonne highest = tapahtui potilaalle | 0 ingen händelse eller läheltä piti<br>1 tapahtui potilaalle | 0<br>0                   |
| Overall Percentage |                                                |                                                              |                          |

Classification Table<sup>a</sup>

| Observed           |                                                | Predicted                                                    |             |
|--------------------|------------------------------------------------|--------------------------------------------------------------|-------------|
|                    |                                                | Percentage Correct                                           |             |
| Step 1             | luonnelt1 luonne highest = tapahtui potilaalle | 0 ingen händelse eller läheltä piti<br>1 tapahtui potilaalle | 100,0<br>,0 |
| Overall Percentage |                                                |                                                              | 93,2        |

a. The cut value is ,500

Variables in the Equation

|                     |          | B      | S.E. | Wald    | df | Sig. | Exp(B) | 95% C.I.<br>Lower |
|---------------------|----------|--------|------|---------|----|------|--------|-------------------|
| Step 1 <sup>a</sup> | sv5      |        |      | 15,236  | 4  | ,004 |        |                   |
|                     | sv5(1)   | -,215  | ,117 | 3,419   | 1  | ,064 | ,806   | ,642              |
|                     | sv5(2)   | -,099  | ,134 | ,551    | 1  | ,458 | ,905   | ,696              |
|                     | sv5(3)   | ,064   | ,121 | ,280    | 1  | ,597 | 1,066  | ,841              |
|                     | sv5(4)   | ,149   | ,114 | 1,719   | 1  | ,190 | 1,161  | ,929              |
|                     | Constant | -2,598 | ,091 | 810,642 | 1  | ,000 | ,074   |                   |

Variables in the Equation

|                     |          | 95% C.I....<br>Upper |
|---------------------|----------|----------------------|
| Step 1 <sup>a</sup> | sv5      |                      |
|                     | sv5(1)   | 1,013                |
|                     | sv5(2)   | 1,177                |
|                     | sv5(3)   | 1,351                |
|                     | sv5(4)   | 1,451                |
|                     | Constant |                      |

a. Variable(s) entered on step 1: sv5.

LOGISTIC REGRESSION VARIABLES luonnelt1

```

/METHOD=ENTER sv7
/CONTRAST (sv7)=Indicator(1)
/PRINT=CI(95)
/CRITERIA=PIN(0.05) POUT(0.10) ITERATE(20) CUT(0.5).

```

## Logistic Regression

[DataSet6] C:\cWordjan\Rafaela\_VCS\alla\_tillsammans\abo\_bjo\_vasa\_v1.sav

### Case Processing Summary

| Unweighted Cases <sup>a</sup> |                      | N     | Percent |
|-------------------------------|----------------------|-------|---------|
| Selected Cases                | Included in Analysis | 12475 | 100,0   |
|                               | Missing Cases        | 0     | ,0      |
|                               | Total                | 12475 | 100,0   |
| Unselected Cases              |                      | 0     | ,0      |
| Total                         |                      | 12475 | 100,0   |

a. If weight is in effect, see classification table for the total number of cases.

### Dependent Variable Encoding

| Original Value                      | Internal Value |
|-------------------------------------|----------------|
| 0 ingen händelse eller läheltä piti | 0              |
| 1 tapahtui potilaalle               | 1              |

### Categorical Variables Codings

|                             |                      | Frequency | Parameter coding |       |       |
|-----------------------------|----------------------|-----------|------------------|-------|-------|
|                             |                      |           | (1)              | (2)   | (3)   |
| sv7 sättedelar för standard | 1 fjärde sjundedelen | 1423      | ,000             | ,000  | ,000  |
|                             | 2 första sjundedelen | 3031      | 1,000            | ,000  | ,000  |
|                             | 3 andra sjundedelen  | 1238      | ,000             | 1,000 | ,000  |
|                             | 4 tredje sjundedelen | 1255      | ,000             | ,000  | 1,000 |
|                             | 5 femte sjundedelen  | 1445      | ,000             | ,000  | ,000  |
|                             | 6 sjätte sjundedelen | 1948      | ,000             | ,000  | ,000  |
|                             | 7 sjunde sjundedelen | 2135      | ,000             | ,000  | ,000  |

### Categorical Variables Codings

|                             |                      | Parameter coding |       |       |
|-----------------------------|----------------------|------------------|-------|-------|
|                             |                      | (4)              | (5)   | (6)   |
| sv7 sättedelar för standard | 1 fjärde sjundedelen | ,000             | ,000  | ,000  |
|                             | 2 första sjundedelen | ,000             | ,000  | ,000  |
|                             | 3 andra sjundedelen  | ,000             | ,000  | ,000  |
|                             | 4 tredje sjundedelen | ,000             | ,000  | ,000  |
|                             | 5 femte sjundedelen  | 1,000            | ,000  | ,000  |
|                             | 6 sjätte sjundedelen | ,000             | 1,000 | ,000  |
|                             | 7 sjunde sjundedelen | ,000             | ,000  | 1,000 |



**Block 0: Beginning Block**

**Classification Table<sup>a,b</sup>**

|                    |                                                |                                                              |
|--------------------|------------------------------------------------|--------------------------------------------------------------|
| Observed           |                                                |                                                              |
| Step 0             | luonnelt1 luonne highest = tapahtui potilaalle | 0 ingen händelse eller läheltä piti<br>1 tapahtui potilaalle |
| Overall Percentage |                                                |                                                              |

**Classification Table<sup>a,b</sup>**

|                    |                                                |                                                              |                                     |
|--------------------|------------------------------------------------|--------------------------------------------------------------|-------------------------------------|
| Observed           |                                                |                                                              | Predicted                           |
|                    |                                                |                                                              | luonnelt1 luonne highest = ...      |
|                    |                                                |                                                              | 0 ingen händelse eller läheltä piti |
| Step 0             | luonnelt1 luonne highest = tapahtui potilaalle | 0 ingen händelse eller läheltä piti<br>1 tapahtui potilaalle | 11627<br>848                        |
| Overall Percentage |                                                |                                                              |                                     |

**Classification Table<sup>a,b</sup>**

|                    |                                                |                                                              |                              |
|--------------------|------------------------------------------------|--------------------------------------------------------------|------------------------------|
| Observed           |                                                |                                                              | Predicted                    |
|                    |                                                |                                                              | luonnelt1 luonne highest ... |
|                    |                                                |                                                              | 1 tapahtui potilaalle        |
| Step 0             | luonnelt1 luonne highest = tapahtui potilaalle | 0 ingen händelse eller läheltä piti<br>1 tapahtui potilaalle | 0<br>0                       |
| Overall Percentage |                                                |                                                              |                              |

**Classification Table<sup>a,b</sup>**

|                    |                                                |                                                              |                    |
|--------------------|------------------------------------------------|--------------------------------------------------------------|--------------------|
| Observed           |                                                |                                                              | Predicted          |
|                    |                                                |                                                              | Percentage Correct |
| Step 0             | luonnelt1 luonne highest = tapahtui potilaalle | 0 ingen händelse eller läheltä piti<br>1 tapahtui potilaalle | 100,0<br>,0        |
| Overall Percentage |                                                |                                                              | 93,2               |

a. Constant is included in the model.

b. The cut value is ,500

#### Variables in the Equation

|                 | B      | S.E. | Wald     | df | Sig. | Exp(B) |
|-----------------|--------|------|----------|----|------|--------|
| Step 0 Constant | -2,618 | ,036 | 5417,889 | 1  | ,000 | ,073   |

#### Variables not in the Equation

|                      | Score  | df | Sig. |
|----------------------|--------|----|------|
| Step 0 Variables sv7 | 19,201 | 6  | ,004 |
| sv7(1)               | 13,339 | 1  | ,000 |
| sv7(2)               | ,536   | 1  | ,464 |
| sv7(3)               | ,394   | 1  | ,530 |
| sv7(4)               | ,282   | 1  | ,596 |
| sv7(5)               | 5,803  | 1  | ,016 |
| sv7(6)               | 2,849  | 1  | ,091 |
| Overall Statistics   | 19,201 | 6  | ,004 |

### Block 1: Method = Enter

#### Omnibus Tests of Model Coefficients

|             | Chi-square | df | Sig. |
|-------------|------------|----|------|
| Step 1 Step | 19,604     | 6  | ,003 |
| Block       | 19,604     | 6  | ,003 |
| Model       | 19,604     | 6  | ,003 |

#### Model Summary

| Step | -2 Log likelihood     | Cox & Snell R Square | Nagelkerke R Square |
|------|-----------------------|----------------------|---------------------|
| 1    | 6177,268 <sup>a</sup> | ,002                 | ,004                |

a. Estimation terminated at iteration number 5 because parameter estimates changed by less than ,001.

#### Classification Table<sup>a</sup>

| Observed           |                                                | Expected                            |                       |
|--------------------|------------------------------------------------|-------------------------------------|-----------------------|
| Step 1             | luonnelt1 luonne highest = tapahtui potilaalle | 0 ingen händelse eller läheltä piti | 1 tapahtui potilaalle |
| Overall Percentage |                                                |                                     |                       |

Classification Table<sup>a</sup>

| Observed           |                                                | Predicted                           |                                     |
|--------------------|------------------------------------------------|-------------------------------------|-------------------------------------|
|                    |                                                | luonnelt1 luonne highest = ...      | 0 ingen händelse eller läheltä piti |
| Step 1             | luonnelt1 luonne highest = tapahtui potilaalle | 0 ingen händelse eller läheltä piti | 11627                               |
|                    |                                                | 1 tapahtui potilaalle               | 848                                 |
| Overall Percentage |                                                |                                     |                                     |

Classification Table<sup>a</sup>

| Observed           |                                                | Predicted                           |                       |
|--------------------|------------------------------------------------|-------------------------------------|-----------------------|
|                    |                                                | luonnelt1 luonne highest ...        | 1 tapahtui potilaalle |
| Step 1             | luonnelt1 luonne highest = tapahtui potilaalle | 0 ingen händelse eller läheltä piti | 0                     |
|                    |                                                | 1 tapahtui potilaalle               | 0                     |
| Overall Percentage |                                                |                                     |                       |

Classification Table<sup>a</sup>

| Observed           |                                                | Predicted                           |       |
|--------------------|------------------------------------------------|-------------------------------------|-------|
|                    |                                                | Percentage Correct                  |       |
| Step 1             | luonnelt1 luonne highest = tapahtui potilaalle | 0 ingen händelse eller läheltä piti | 100,0 |
|                    |                                                | 1 tapahtui potilaalle               | ,0    |
| Overall Percentage |                                                |                                     | 93,2  |

a. The cut value is ,500

Variables in the Equation

|                         | B      | S.E. | Wald    | df | Sig. | Exp(B) | 95% C.I.. |
|-------------------------|--------|------|---------|----|------|--------|-----------|
|                         |        |      |         |    |      |        | Lower     |
| Step 1 <sup>a</sup> sv7 |        |      | 19,036  | 6  | ,004 |        |           |
| sv7(1)                  | -,344  | ,130 | 7,051   | 1  | ,008 | ,709   | ,550      |
| sv7(2)                  | -,170  | ,155 | 1,200   | 1  | ,273 | ,844   | ,623      |
| sv7(3)                  | -,157  | ,154 | 1,044   | 1  | ,307 | ,855   | ,632      |
| sv7(4)                  | -,037  | ,144 | ,067    | 1  | ,796 | ,963   | ,727      |
| sv7(5)                  | ,096   | ,131 | ,531    | 1  | ,466 | 1,100  | ,851      |
| sv7(6)                  | ,037   | ,130 | ,080    | 1  | ,777 | 1,038  | ,804      |
| Constant                | -2,530 | ,101 | 622,458 | 1  | ,000 | ,080   |           |

Variables in the Equation

|                         | 95% C.I.... |
|-------------------------|-------------|
|                         | Upper       |
| Step 1 <sup>a</sup> sv7 |             |
| sv7(1)                  | ,914        |
| sv7(2)                  | 1,143       |
| sv7(3)                  | 1,155       |
| sv7(4)                  | 1,278       |
| sv7(5)                  | 1,423       |
| sv7(6)                  | 1,339       |
| Constant                |             |

a. Variable(s) entered on step 1: sv7.

\*\*

LOGISTIC REGRESSION VARIABLES seurauslt3

/METHOD=ENTER bv1

/CONTRAST (bv1)=Indicator(1)

/PRINT=CI(95)

/CRITERIA=PIN(0.05) POUT(0.10) ITERATE(20) CUT(0.5).

## Logistic Regression

[DataSet6] C:\cWordjan\Rafaela\_VCS\alla\_tillsammans\abo\_bjo\_vasa\_v1.sav

**Case Processing Summary**

| Unweighted Cases <sup>a</sup> |                      | N     | Percent |
|-------------------------------|----------------------|-------|---------|
| Selected Cases                | Included in Analysis | 12475 | 100,0   |
|                               | Missing Cases        | 0     | ,0      |
|                               | Total                | 12475 | 100,0   |
| Unselected Cases              |                      | 0     | ,0      |
| Total                         |                      | 12475 | 100,0   |

a. If weight is in effect, see classification table for the total number of cases.

**Dependent Variable Encoding**

| Original Value                    | Internal Value |
|-----------------------------------|----------------|
| 0 ingen händelse eller ei haittaa | 0              |
| 1 haitta (i någon form)           | 1              |

**Categorical Variables Codings**

|                           | Frequency         | Parameter coding |       |       |
|---------------------------|-------------------|------------------|-------|-------|
|                           |                   | (1)              | (2)   |       |
| bv1 belastning vs paencil | 1 medelbelastning | 5380             | ,000  | ,000  |
|                           | 2 underbelastning | 3222             | 1,000 | ,000  |
|                           | 3 överbelastning  | 3873             | ,000  | 1,000 |

**Block 0: Beginning Block**

**Classification Table<sup>a,b</sup>**

| Observed           |                                                   |                                                              |
|--------------------|---------------------------------------------------|--------------------------------------------------------------|
| Step 0             | seuraust3 seuraus highest = haitta (i någon form) | 0 ingen händelse eller ei haittaa<br>1 haitta (i någon form) |
| Overall Percentage |                                                   |                                                              |

**Classification Table<sup>a,b</sup>**

|                    |                                                   |                                                              | Predicted                               |
|--------------------|---------------------------------------------------|--------------------------------------------------------------|-----------------------------------------|
|                    |                                                   |                                                              | seuraust3<br>seuraus highest            |
|                    |                                                   |                                                              | 0 ingen<br>händelse eller<br>ei haittaa |
| Step 0             | seuraust3 seuraus highest = haitta (i någon form) | 0 ingen händelse eller ei haittaa<br>1 haitta (i någon form) | 12075<br>400                            |
| Overall Percentage |                                                   |                                                              |                                         |

Classification Table<sup>a,b</sup>

| Observed           |                                                   | Predicted                         |                         |
|--------------------|---------------------------------------------------|-----------------------------------|-------------------------|
|                    |                                                   | seuraust3 seuraus highest ..      | 1 haitta (i någon form) |
| Step 0             | seuraust3 seuraus highest = haitta (i någon form) | 0 ingen händelse eller ei haittaa | 0                       |
|                    |                                                   | 1 haitta (i någon form)           | 0                       |
| Overall Percentage |                                                   |                                   |                         |

Classification Table<sup>a,b</sup>

| Observed           |                                                   | Predicted                         |       |
|--------------------|---------------------------------------------------|-----------------------------------|-------|
|                    |                                                   | Percentage Correct                |       |
| Step 0             | seuraust3 seuraus highest = haitta (i någon form) | 0 ingen händelse eller ei haittaa | 100,0 |
|                    |                                                   | 1 haitta (i någon form)           | ,0    |
| Overall Percentage |                                                   |                                   | 96,8  |

a. Constant is included in the model.

b. The cut value is ,500

Variables in the Equation

|                 | B      | S.E. | Wald     | df | Sig. | Exp(B) |
|-----------------|--------|------|----------|----|------|--------|
| Step 0 Constant | -3,407 | ,051 | 4495,313 | 1  | ,000 | ,033   |

Variables not in the Equation

|                    | Score  | df | Sig. |
|--------------------|--------|----|------|
| Step 0 Variables   |        |    |      |
| bv1                | 15,180 | 2  | ,001 |
| bv1(1)             | 13,218 | 1  | ,000 |
| bv1(2)             | 7,430  | 1  | ,006 |
| Overall Statistics | 15,180 | 2  | ,001 |

## Block 1: Method = Enter

Omnibus Tests of Model Coefficients

|             | Chi-square | df | Sig. |
|-------------|------------|----|------|
| Step 1 Step | 16,012     | 2  | ,000 |
| Block       | 16,012     | 2  | ,000 |
| Model       | 16,012     | 2  | ,000 |

**Model Summary**

| Step | -2 Log likelihood     | Cox & Snell R Square | Nagelkerke R Square |
|------|-----------------------|----------------------|---------------------|
| 1    | 3523,037 <sup>a</sup> | ,001                 | ,005                |

a. Estimation terminated at iteration number 6 because parameter estimates changed by less than ,001.

**Classification Table<sup>a</sup>**

| Observed           |                                                    |                                                              |
|--------------------|----------------------------------------------------|--------------------------------------------------------------|
| Step 1             | seorauslt3 seuraus highest = haitta (i någon form) | 0 ingen händelse eller ei haittaa<br>1 haitta (i någon form) |
| Overall Percentage |                                                    |                                                              |

**Classification Table<sup>a</sup>**

| Observed           |                                                    |                                                              | Predicted                                                       |
|--------------------|----------------------------------------------------|--------------------------------------------------------------|-----------------------------------------------------------------|
| Step 1             | seorauslt3 seuraus highest = haitta (i någon form) | 0 ingen händelse eller ei haittaa<br>1 haitta (i någon form) | seorauslt3 seuraus highest<br>0 ingen händelse eller ei haittaa |
| Overall Percentage |                                                    |                                                              | 12075<br>400                                                    |

**Classification Table<sup>a</sup>**

| Observed           |                                                    |                                                              | Predicted                                                |
|--------------------|----------------------------------------------------|--------------------------------------------------------------|----------------------------------------------------------|
| Step 1             | seorauslt3 seuraus highest = haitta (i någon form) | 0 ingen händelse eller ei haittaa<br>1 haitta (i någon form) | seorauslt3 seuraus highest ..<br>1 haitta (i någon form) |
| Overall Percentage |                                                    |                                                              | 0<br>0                                                   |

Classification Table<sup>a</sup>

|                    |                                                   |                                   | Predicted          |
|--------------------|---------------------------------------------------|-----------------------------------|--------------------|
| Observed           |                                                   |                                   | Percentage Correct |
| Step 1             | seuraust3 seuraus highest = haitta (i någon form) | 0 ingen händelse eller ei haittaa | 100,0              |
|                    |                                                   | 1 haitta (i någon form)           | ,0                 |
| Overall Percentage |                                                   |                                   | 96,8               |

a. The cut value is ,500

Variables in the Equation

|                     |          | B      | S.E. | Wald     | df | Sig. | Exp(B) | 95% C.I.. |
|---------------------|----------|--------|------|----------|----|------|--------|-----------|
|                     |          | Lower  |      |          |    |      |        |           |
| Step 1 <sup>a</sup> | bv1      |        |      | 14,905   | 2  | ,001 |        |           |
|                     | bv1(1)   | -,409  | ,141 | 8,381    | 1  | ,004 | ,664   | ,503      |
|                     | bv1(2)   | ,151   | ,113 | 1,778    | 1  | ,182 | 1,163  | ,932      |
|                     | Constant | -3,369 | ,076 | 1964,339 | 1  | ,000 | ,034   |           |

Variables in the Equation

|                     |          | 95% C.I.... |
|---------------------|----------|-------------|
|                     |          | Upper       |
| Step 1 <sup>a</sup> | bv1      |             |
|                     | bv1(1)   | ,876        |
|                     | bv1(2)   | 1,451       |
|                     | Constant |             |

a. Variable(s) entered on step 1: bv1.

```
LOGISTIC REGRESSION VARIABLES seuraust3
/METHOD=ENTER bv2
/CONTRAST (bv2)=Indicator(1)
/PRINT=CI(95)
/CRITERIA=PIN(0.05) POUT(0.10) ITERATE(20) CUT(0.5).
```

## Logistic Regression

[DataSet6] C:\cWordjan\Rafaela\_VCS\alla\_tillsammans\abo\_bjo\_vasa\_v1.sav



**Case Processing Summary**

| Unweighted Cases <sup>a</sup> |                      | N     | Percent |
|-------------------------------|----------------------|-------|---------|
| Selected Cases                | Included in Analysis | 12475 | 100,0   |
|                               | Missing Cases        | 0     | ,0      |
|                               | Total                | 12475 | 100,0   |
| Unselected Cases              |                      | 0     | ,0      |
| Total                         |                      | 12475 | 100,0   |

a. If weight is in effect, see classification table for the total number of cases.

**Dependent Variable Encoding**

| Original Value                    | Internal Value |
|-----------------------------------|----------------|
| 0 ingen händelse eller ei haittaa | 0              |
| 1 haitta (i någon form)           | 1              |

**Categorical Variables Codings**

|                                             |                   | Frequency | Parameter coding |       |
|---------------------------------------------|-------------------|-----------|------------------|-------|
|                                             |                   |           | (1)              | (2)   |
| bv2 belastning vs paencil halva intervallet | 1 medelbelastning | 2788      | ,000             | ,000  |
|                                             | 2 underbelastning | 4419      | 1,000            | ,000  |
|                                             | 3 överbelastning  | 5268      | ,000             | 1,000 |

**Block 0: Beginning Block**

**Classification Table<sup>a,b</sup>**

| Observed           |                                                   |                                                              |
|--------------------|---------------------------------------------------|--------------------------------------------------------------|
| Step 0             | seuraust3 seuraus highest = haitta (i någon form) | 0 ingen händelse eller ei haittaa<br>1 haitta (i någon form) |
| Overall Percentage |                                                   |                                                              |

**Classification Table<sup>a,b</sup>**

| Observed           |                                                   | Predicted                         |
|--------------------|---------------------------------------------------|-----------------------------------|
| Step 0             | seuraust3 seuraus highest = haitta (i någon form) | seuraust3 seuraus highest         |
|                    |                                                   | 0 ingen händelse eller ei haittaa |
| Overall Percentage |                                                   | 12075<br>400                      |

Classification Table<sup>a,b</sup>

| Observed           |                                                   | Predicted                         |                         |
|--------------------|---------------------------------------------------|-----------------------------------|-------------------------|
|                    |                                                   | seuraust3 seuraus highest ..      | 1 haitta (i någon form) |
| Step 0             | seuraust3 seuraus highest = haitta (i någon form) | 0 ingen händelse eller ei haittaa | 0                       |
|                    |                                                   | 1 haitta (i någon form)           | 0                       |
| Overall Percentage |                                                   |                                   |                         |

Classification Table<sup>a,b</sup>

| Observed           |                                                   | Predicted                         |       |
|--------------------|---------------------------------------------------|-----------------------------------|-------|
|                    |                                                   | Percentage Correct                |       |
| Step 0             | seuraust3 seuraus highest = haitta (i någon form) | 0 ingen händelse eller ei haittaa | 100,0 |
|                    |                                                   | 1 haitta (i någon form)           | ,0    |
| Overall Percentage |                                                   |                                   | 96,8  |

a. Constant is included in the model.

b. The cut value is ,500

Variables in the Equation

|                 | B      | S.E. | Wald     | df | Sig. | Exp(B) |
|-----------------|--------|------|----------|----|------|--------|
| Step 0 Constant | -3,407 | ,051 | 4495,313 | 1  | ,000 | ,033   |

Variables not in the Equation

|                    | Score  | df | Sig. |
|--------------------|--------|----|------|
| Step 0 Variables   |        |    |      |
| bv2                | 10,042 | 2  | ,007 |
| bv2(1)             | 8,044  | 1  | ,005 |
| bv2(2)             | 8,351  | 1  | ,004 |
| Overall Statistics | 10,042 | 2  | ,007 |

## Block 1: Method = Enter

Omnibus Tests of Model Coefficients

|             | Chi-square | df | Sig. |
|-------------|------------|----|------|
| Step 1 Step | 10,152     | 2  | ,006 |
| Block       | 10,152     | 2  | ,006 |
| Model       | 10,152     | 2  | ,006 |

**Model Summary**

| Step | -2 Log likelihood     | Cox & Snell R Square | Nagelkerke R Square |
|------|-----------------------|----------------------|---------------------|
| 1    | 3528,897 <sup>a</sup> | ,001                 | ,003                |

a. Estimation terminated at iteration number 6 because parameter estimates changed by less than ,001.

**Classification Table<sup>a</sup>**

| Observed           |                                                   |                                                              |
|--------------------|---------------------------------------------------|--------------------------------------------------------------|
| Step 1             | seuraust3 seuraus highest = haitta (i någon form) | 0 ingen händelse eller ei haittaa<br>1 haitta (i någon form) |
| Overall Percentage |                                                   |                                                              |

**Classification Table<sup>a</sup>**

| Observed           |                                                   |                                                              | Predicted                                                      |
|--------------------|---------------------------------------------------|--------------------------------------------------------------|----------------------------------------------------------------|
| Step 1             | seuraust3 seuraus highest = haitta (i någon form) | 0 ingen händelse eller ei haittaa<br>1 haitta (i någon form) | seuraust3 seuraus highest<br>0 ingen händelse eller ei haittaa |
| Overall Percentage |                                                   |                                                              | 12075<br>400                                                   |

**Classification Table<sup>a</sup>**

| Observed           |                                                   |                                                              | Predicted                                               |
|--------------------|---------------------------------------------------|--------------------------------------------------------------|---------------------------------------------------------|
| Step 1             | seuraust3 seuraus highest = haitta (i någon form) | 0 ingen händelse eller ei haittaa<br>1 haitta (i någon form) | seuraust3 seuraus highest ..<br>1 haitta (i någon form) |
| Overall Percentage |                                                   |                                                              | 0<br>0                                                  |

Classification Table<sup>a</sup>

|                    |                                                   |                                   | Predicted          |
|--------------------|---------------------------------------------------|-----------------------------------|--------------------|
| Observed           |                                                   |                                   | Percentage Correct |
| Step 1             | seuraust3 seuraus highest = haitta (i någon form) | 0 ingen händelse eller ei haittaa | 100,0              |
|                    |                                                   | 1 haitta (i någon form)           | ,0                 |
| Overall Percentage |                                                   |                                   | 96,8               |

a. The cut value is ,500

Variables in the Equation

|                     |          | B      | S.E. | Wald    | df | Sig. | Exp(B) | 95% C.I.<br>Lower |
|---------------------|----------|--------|------|---------|----|------|--------|-------------------|
| Step 1 <sup>a</sup> | bv2      |        |      | 9,953   | 2  | ,007 |        |                   |
|                     | bv2(1)   | -,199  | ,144 | 1,911   | 1  | ,167 | ,820   | ,619              |
|                     | bv2(2)   | ,176   | ,130 | 1,813   | 1  | ,178 | 1,192  | ,923              |
|                     | Constant | -3,424 | ,108 | 998,936 | 1  | ,000 | ,033   |                   |

Variables in the Equation

|                     |          | 95% C.I.<br>Upper |
|---------------------|----------|-------------------|
| Step 1 <sup>a</sup> | bv2      |                   |
|                     | bv2(1)   | 1,087             |
|                     | bv2(2)   | 1,539             |
|                     | Constant |                   |

a. Variable(s) entered on step 1: bv2.

```
LOGISTIC REGRESSION VARIABLES seurauslt3
/METHOD=ENTER bv3
/CONTRAST (bv3)=Indicator(1)
/PRINT=CI(95)
/CRITERIA=PIN(0.05) POUT(0.10) ITERATE(20) CUT(0.5).
```

## Logistic Regression

[DataSet6] C:\cWordjan\Rafaela\_VCS\alla\_tillsammans\abo\_bjo\_vasa\_v1.sav

**Case Processing Summary**

| Unweighted Cases <sup>a</sup> |                      | N     | Percent |
|-------------------------------|----------------------|-------|---------|
| Selected Cases                | Included in Analysis | 12475 | 100,0   |
|                               | Missing Cases        | 0     | ,0      |
|                               | Total                | 12475 | 100,0   |
| Unselected Cases              |                      | 0     | ,0      |
| Total                         |                      | 12475 | 100,0   |

a. If weight is in effect, see classification table for the total number of cases.

**Dependent Variable Encoding**

| Original Value                    | Internal Value |
|-----------------------------------|----------------|
| 0 ingen händelse eller ei haittaa | 0              |
| 1 haitta (i någon form)           | 1              |

**Categorical Variables Codings**

|                                              | Frequency         | Parameter coding |       |
|----------------------------------------------|-------------------|------------------|-------|
|                                              |                   | (1)              | (2)   |
| bv3 belasnting vs paoncil dubbla intervallet | 1 medelbelastning | 9121             | ,000  |
|                                              | 2 underbelastning | 1505             | 1,000 |
|                                              | 3 överbelastning  | 1849             | ,000  |

**Block 0: Beginning Block****Classification Table<sup>a,b</sup>**

| Observed           |                                                   |                                                              |
|--------------------|---------------------------------------------------|--------------------------------------------------------------|
| Step 0             | seuraust3 seuraus highest = haitta (i någon form) | 0 ingen händelse eller ei haittaa<br>1 haitta (i någon form) |
| Overall Percentage |                                                   |                                                              |

**Classification Table<sup>a,b</sup>**

|                    |                                                   |                                                              | Predicted                               |
|--------------------|---------------------------------------------------|--------------------------------------------------------------|-----------------------------------------|
|                    |                                                   |                                                              | seuraust3<br>seuraus highest            |
|                    |                                                   |                                                              | 0 ingen<br>händelse eller<br>ei haittaa |
| Step 0             | seuraust3 seuraus highest = haitta (i någon form) | 0 ingen händelse eller ei haittaa<br>1 haitta (i någon form) | 12075<br>400                            |
| Overall Percentage |                                                   |                                                              |                                         |

Classification Table<sup>a,b</sup>

| Observed           |                                                   | Predicted                         |                         |
|--------------------|---------------------------------------------------|-----------------------------------|-------------------------|
|                    |                                                   | seuraust3 seuraus highest ..      | 1 haitta (i någon form) |
| Step 0             | seuraust3 seuraus highest = haitta (i någon form) | 0 ingen händelse eller ei haittaa | 0                       |
|                    |                                                   | 1 haitta (i någon form)           | 0                       |
| Overall Percentage |                                                   |                                   |                         |

Classification Table<sup>a,b</sup>

| Observed           |                                                   | Predicted                         |       |
|--------------------|---------------------------------------------------|-----------------------------------|-------|
|                    |                                                   | Percentage Correct                |       |
| Step 0             | seuraust3 seuraus highest = haitta (i någon form) | 0 ingen händelse eller ei haittaa | 100,0 |
|                    |                                                   | 1 haitta (i någon form)           | ,0    |
| Overall Percentage |                                                   |                                   | 96,8  |

a. Constant is included in the model.

b. The cut value is ,500

Variables in the Equation

|                 | B      | S.E. | Wald     | df | Sig. | Exp(B) |
|-----------------|--------|------|----------|----|------|--------|
| Step 0 Constant | -3,407 | ,051 | 4495,313 | 1  | ,000 | ,033   |

Variables not in the Equation

|                    | Score | df | Sig. |
|--------------------|-------|----|------|
| Step 0 Variables   |       |    |      |
| bv3                | 6,457 | 2  | ,040 |
| bv3(1)             | 5,667 | 1  | ,017 |
| bv3(2)             | 1,553 | 1  | ,213 |
| Overall Statistics | 6,457 | 2  | ,040 |

## Block 1: Method = Enter

Omnibus Tests of Model Coefficients

|             | Chi-square | df | Sig. |
|-------------|------------|----|------|
| Step 1 Step | 7,005      | 2  | ,030 |
| Block       | 7,005      | 2  | ,030 |
| Model       | 7,005      | 2  | ,030 |

**Model Summary**

| Step | -2 Log likelihood     | Cox & Snell R Square | Nagelkerke R Square |
|------|-----------------------|----------------------|---------------------|
| 1    | 3532,043 <sup>a</sup> | ,001                 | ,002                |

a. Estimation terminated at iteration number 6 because parameter estimates changed by less than ,001.

**Classification Table<sup>a</sup>**

| Observed           |                                                    |                                                              |
|--------------------|----------------------------------------------------|--------------------------------------------------------------|
| Step 1             | seorauslt3 seuraus highest = haitta (i någon form) | 0 ingen händelse eller ei haittaa<br>1 haitta (i någon form) |
| Overall Percentage |                                                    |                                                              |

**Classification Table<sup>a</sup>**

| Observed           |                                                    |                                                              | Predicted                         |
|--------------------|----------------------------------------------------|--------------------------------------------------------------|-----------------------------------|
|                    |                                                    |                                                              | seorauslt3 seuraus highest        |
|                    |                                                    |                                                              | 0 ingen händelse eller ei haittaa |
| Step 1             | seorauslt3 seuraus highest = haitta (i någon form) | 0 ingen händelse eller ei haittaa<br>1 haitta (i någon form) | 12075<br>400                      |
| Overall Percentage |                                                    |                                                              |                                   |

**Classification Table<sup>a</sup>**

| Observed           |                                                    |                                                              | Predicted                     |
|--------------------|----------------------------------------------------|--------------------------------------------------------------|-------------------------------|
|                    |                                                    |                                                              | seorauslt3 seuraus highest .. |
|                    |                                                    |                                                              | 1 haitta (i någon form)       |
| Step 1             | seorauslt3 seuraus highest = haitta (i någon form) | 0 ingen händelse eller ei haittaa<br>1 haitta (i någon form) | 0<br>0                        |
| Overall Percentage |                                                    |                                                              |                               |

Classification Table<sup>a</sup>

|                    |                                                   |                                   | Predicted          |
|--------------------|---------------------------------------------------|-----------------------------------|--------------------|
| Observed           |                                                   |                                   | Percentage Correct |
| Step 1             | seuraust3 seuraus highest = haitta (i någon form) | 0 ingen händelse eller ei haittaa | 100,0              |
|                    |                                                   | 1 haitta (i någon form)           | ,0                 |
| Overall Percentage |                                                   |                                   | 96,8               |

a. The cut value is ,500

Variables in the Equation

|                     |          | B      | S.E. | Wald     | df | Sig. | Exp(B) | 95% C.I.<br>Lower |
|---------------------|----------|--------|------|----------|----|------|--------|-------------------|
| Step 1 <sup>a</sup> | bv3      |        |      | 6,364    | 2  | ,042 |        |                   |
|                     | bv3(1)   | -,413  | ,186 | 4,960    | 1  | ,026 | ,661   | ,460              |
|                     | bv3(2)   | ,119   | ,137 | ,758     | 1  | ,384 | 1,127  | ,862              |
|                     | Constant | -3,385 | ,059 | 3312,839 | 1  | ,000 | ,034   |                   |

Variables in the Equation

|                     |          | 95% C.I.<br>Upper |
|---------------------|----------|-------------------|
| Step 1 <sup>a</sup> | bv3      |                   |
|                     | bv3(1)   | ,952              |
|                     | bv3(2)   | 1,473             |
|                     | Constant |                   |

a. Variable(s) entered on step 1: bv3.

```
LOGISTIC REGRESSION VARIABLES seuraust3
/METHOD=ENTER sv3
/CONTRAST (sv3)=Indicator(1)
/PRINT=CI(95)
/CRITERIA=PIN(0.05) POUT(0.10) ITERATE(20) CUT(0.5).
```

## Logistic Regression

[DataSet6] C:\cWordjan\Rafaela\_VCS\alla\_tillsammans\abo\_bjo\_vasa\_v1.sav



**Case Processing Summary**

| Unweighted Cases <sup>a</sup> |                      | N     | Percent |
|-------------------------------|----------------------|-------|---------|
| Selected Cases                | Included in Analysis | 12475 | 100,0   |
|                               | Missing Cases        | 0     | ,0      |
|                               | Total                | 12475 | 100,0   |
| Unselected Cases              |                      | 0     | ,0      |
| Total                         |                      | 12475 | 100,0   |

a. If weight is in effect, see classification table for the total number of cases.

**Dependent Variable Encoding**

| Original Value                    | Internal Value |
|-----------------------------------|----------------|
| 0 ingen händelse eller ei haittaa | 0              |
| 1 haitta (i någon form)           | 1              |

**Categorical Variables Codings**

|                              |                      | Frequency | Parameter coding |       |
|------------------------------|----------------------|-----------|------------------|-------|
|                              |                      |           | (1)              | (2)   |
| sv3 tredjedelar för standard | 1 andra tredjedelen  | 3172      | ,000             | ,000  |
|                              | 2 första tredjedelen | 4718      | 1,000            | ,000  |
|                              | 3 tredje tredjedelen | 4585      | ,000             | 1,000 |

**Block 0: Beginning Block****Classification Table<sup>a,b</sup>**

| Observed           |                                                   |                                   |                         |
|--------------------|---------------------------------------------------|-----------------------------------|-------------------------|
| Step 0             | seuraust3 seuraus highest = haitta (i någon form) | 0 ingen händelse eller ei haittaa | 1 haitta (i någon form) |
| Overall Percentage |                                                   |                                   |                         |

**Classification Table<sup>a,b</sup>**

| Observed           |                                                   |                                   | Predicted                         |
|--------------------|---------------------------------------------------|-----------------------------------|-----------------------------------|
|                    |                                                   |                                   | seuraust3 seuraus highest         |
|                    |                                                   |                                   | 0 ingen händelse eller ei haittaa |
| Step 0             | seuraust3 seuraus highest = haitta (i någon form) | 0 ingen händelse eller ei haittaa | 12075                             |
|                    |                                                   | 1 haitta (i någon form)           | 400                               |
| Overall Percentage |                                                   |                                   |                                   |

Classification Table<sup>a,b</sup>

| Observed           |                                                    | Predicted                                                    |                         |
|--------------------|----------------------------------------------------|--------------------------------------------------------------|-------------------------|
|                    |                                                    | seurauslt3 seuraus highest ..                                | 1 haitta (i någon form) |
| Step 0             | seurauslt3 seuraus highest = haitta (i någon form) | 0 ingen händelse eller ei haittaa<br>1 haitta (i någon form) | 0<br>0                  |
| Overall Percentage |                                                    |                                                              |                         |

Classification Table<sup>a,b</sup>

| Observed           |                                                    | Predicted                                                    |             |
|--------------------|----------------------------------------------------|--------------------------------------------------------------|-------------|
|                    |                                                    | Percentage Correct                                           |             |
| Step 0             | seurauslt3 seuraus highest = haitta (i någon form) | 0 ingen händelse eller ei haittaa<br>1 haitta (i någon form) | 100,0<br>,0 |
| Overall Percentage |                                                    |                                                              | 96,8        |

a. Constant is included in the model.

b. The cut value is ,500

Variables in the Equation

|                 | B      | S.E. | Wald     | df | Sig. | Exp(B) |
|-----------------|--------|------|----------|----|------|--------|
| Step 0 Constant | -3,407 | ,051 | 4495,313 | 1  | ,000 | ,033   |

Variables not in the Equation

|                      | Score  | df | Sig. |
|----------------------|--------|----|------|
| Step 0 Variables sv3 | 13,876 | 2  | ,001 |
| sv3(1)               | 10,745 | 1  | ,001 |
| sv3(2)               | 11,368 | 1  | ,001 |
| Overall Statistics   | 13,876 | 2  | ,001 |

## Block 1: Method = Enter

Omnibus Tests of Model Coefficients

|             | Chi-square | df | Sig. |
|-------------|------------|----|------|
| Step 1 Step | 13,919     | 2  | ,001 |
| Block       | 13,919     | 2  | ,001 |
| Model       | 13,919     | 2  | ,001 |

**Model Summary**

| Step | -2 Log likelihood     | Cox & Snell R Square | Nagelkerke R Square |
|------|-----------------------|----------------------|---------------------|
| 1    | 3525,130 <sup>a</sup> | ,001                 | ,005                |

a. Estimation terminated at iteration number 6 because parameter estimates changed by less than ,001.

**Classification Table<sup>a</sup>**

| Observed           |                                                    |                                                              |
|--------------------|----------------------------------------------------|--------------------------------------------------------------|
| Step 1             | seurauslt3 seuraus highest = haitta (i någon form) | 0 ingen händelse eller ei haittaa<br>1 haitta (i någon form) |
| Overall Percentage |                                                    |                                                              |

**Classification Table<sup>a</sup>**

| Observed           |                                                    |                                                              | Predicted                                                       |
|--------------------|----------------------------------------------------|--------------------------------------------------------------|-----------------------------------------------------------------|
| Step 1             | seurauslt3 seuraus highest = haitta (i någon form) | 0 ingen händelse eller ei haittaa<br>1 haitta (i någon form) | seurauslt3 seuraus highest<br>0 ingen händelse eller ei haittaa |
| Overall Percentage |                                                    |                                                              | 12075<br>400                                                    |

**Classification Table<sup>a</sup>**

| Observed           |                                                    |                                                              | Predicted                                                |
|--------------------|----------------------------------------------------|--------------------------------------------------------------|----------------------------------------------------------|
| Step 1             | seurauslt3 seuraus highest = haitta (i någon form) | 0 ingen händelse eller ei haittaa<br>1 haitta (i någon form) | seurauslt3 seuraus highest ..<br>1 haitta (i någon form) |
| Overall Percentage |                                                    |                                                              | 0<br>0                                                   |

Classification Table<sup>a</sup>

|                    |                                                   |                                   | Predicted          |
|--------------------|---------------------------------------------------|-----------------------------------|--------------------|
| Observed           |                                                   |                                   | Percentage Correct |
| Step 1             | seuraust3 seuraus highest = haitta (i någon form) | 0 ingen händelse eller ei haittaa | 100,0              |
|                    |                                                   | 1 haitta (i någon form)           | ,0                 |
| Overall Percentage |                                                   |                                   | 96,8               |

a. The cut value is ,500

Variables in the Equation

|                     |          | B      | S.E. | Wald     | df | Sig. | Exp(B) | 95% C.I.<br>Lower |
|---------------------|----------|--------|------|----------|----|------|--------|-------------------|
| Step 1 <sup>a</sup> | sv3      |        |      | 13,710   | 2  | ,001 |        |                   |
|                     | sv3(1)   | -,231  | ,137 | 2,848    | 1  | ,091 | ,794   | ,607              |
|                     | sv3(2)   | ,211   | ,127 | 2,784    | 1  | ,095 | 1,235  | ,964              |
|                     | Constant | -3,415 | ,101 | 1140,138 | 1  | ,000 | ,033   |                   |

Variables in the Equation

|                     |          | 95% C.I.<br>Upper |
|---------------------|----------|-------------------|
| Step 1 <sup>a</sup> | sv3      |                   |
|                     | sv3(1)   | 1,038             |
|                     | sv3(2)   | 1,583             |
|                     | Constant |                   |

a. Variable(s) entered on step 1: sv3.

```
LOGISTIC REGRESSION VARIABLES seurauslt3
/METHOD=ENTER sv5
/CONTRAST (sv5)=Indicator(1)
/PRINT=CI(95)
/CRITERIA=PIN(0.05) POUT(0.10) ITERATE(20) CUT(0.5).
```

## Logistic Regression

[DataSet6] C:\cWordjan\Rafaela\_VCS\alla\_tillsammans\abo\_bjo\_vasa\_v1.sav

**Case Processing Summary**

| Unweighted Cases <sup>a</sup> |                      | N     | Percent |
|-------------------------------|----------------------|-------|---------|
| Selected Cases                | Included in Analysis | 12475 | 100,0   |
|                               | Missing Cases        | 0     | ,0      |
|                               | Total                | 12475 | 100,0   |
| Unselected Cases              |                      | 0     | ,0      |
| Total                         |                      | 12475 | 100,0   |

a. If weight is in effect, see classification table for the total number of cases.

**Dependent Variable Encoding**

| Original Value                    | Internal Value |
|-----------------------------------|----------------|
| 0 ingen händelse eller ei haittaa | 0              |
| 1 haitta (i någon form)           | 1              |

**Categorical Variables Codings**

|                            |                    | Frequency | Parameter coding |       |       |       |
|----------------------------|--------------------|-----------|------------------|-------|-------|-------|
|                            |                    |           | (1)              | (2)   | (3)   | (4)   |
| sv5 kvintiler för standard | 1 tredje kvintilen | 1863      | ,000             | ,000  | ,000  | ,000  |
|                            | 2 första kvintilen | 3570      | 1,000            | ,000  | ,000  | ,000  |
|                            | 3 andra kvintilen  | 1759      | ,000             | 1,000 | ,000  | ,000  |
|                            | 4 fjärde kvintilen | 2327      | ,000             | ,000  | 1,000 | ,000  |
|                            | 5 femte kvintilen  | 2956      | ,000             | ,000  | ,000  | 1,000 |

**Block 0: Beginning Block****Classification Table<sup>a,b</sup>**

|                    |                                                   |                                                              |
|--------------------|---------------------------------------------------|--------------------------------------------------------------|
| Observed           |                                                   |                                                              |
| Step 0             | seuraust3 seuraus highest = haitta (i någon form) | 0 ingen händelse eller ei haittaa<br>1 haitta (i någon form) |
| Overall Percentage |                                                   |                                                              |

**Classification Table<sup>a,b</sup>**

|        |                                                   |                                         |
|--------|---------------------------------------------------|-----------------------------------------|
|        |                                                   | Predicted                               |
|        |                                                   | seuraust3<br>seuraus highest            |
|        |                                                   | 0 ingen<br>händelse eller<br>ei haittaa |
| Step 0 | seuraust3 seuraus highest = haitta (i någon form) | 12075<br>400                            |
|        |                                                   | Overall Percentage                      |

Classification Table<sup>a,b</sup>

| Observed           |                                                   | Predicted                         |                         |
|--------------------|---------------------------------------------------|-----------------------------------|-------------------------|
|                    |                                                   | seuraust3 seuraus highest ..      | 1 haitta (i någon form) |
| Step 0             | seuraust3 seuraus highest = haitta (i någon form) | 0 ingen händelse eller ei haittaa | 0                       |
|                    |                                                   | 1 haitta (i någon form)           | 0                       |
| Overall Percentage |                                                   |                                   |                         |

Classification Table<sup>a,b</sup>

| Observed           |                                                   | Predicted                         |       |
|--------------------|---------------------------------------------------|-----------------------------------|-------|
|                    |                                                   | Percentage Correct                |       |
| Step 0             | seuraust3 seuraus highest = haitta (i någon form) | 0 ingen händelse eller ei haittaa | 100,0 |
|                    |                                                   | 1 haitta (i någon form)           | ,0    |
| Overall Percentage |                                                   |                                   | 96,8  |

a. Constant is included in the model.

b. The cut value is ,500

Variables in the Equation

|                 | B      | S.E. | Wald     | df | Sig. | Exp(B) |
|-----------------|--------|------|----------|----|------|--------|
| Step 0 Constant | -3,407 | ,051 | 4495,313 | 1  | ,000 | ,033   |

Variables not in the Equation

|                      | Score  | df | Sig. |
|----------------------|--------|----|------|
| Step 0 Variables sv5 | 17,499 | 4  | ,002 |
| sv5(1)               | 6,383  | 1  | ,012 |
| sv5(2)               | 2,772  | 1  | ,096 |
| sv5(3)               | 1,836  | 1  | ,175 |
| sv5(4)               | 11,375 | 1  | ,001 |
| Overall Statistics   | 17,499 | 4  | ,002 |

## Block 1: Method = Enter

Omnibus Tests of Model Coefficients

|             | Chi-square | df | Sig. |
|-------------|------------|----|------|
| Step 1 Step | 17,212     | 4  | ,002 |
| Block       | 17,212     | 4  | ,002 |
| Model       | 17,212     | 4  | ,002 |

**Model Summary**

| Step | -2 Log likelihood     | Cox & Snell R Square | Nagelkerke R Square |
|------|-----------------------|----------------------|---------------------|
| 1    | 3521,837 <sup>a</sup> | ,001                 | ,006                |

a. Estimation terminated at iteration number 6 because parameter estimates changed by less than ,001.

**Classification Table<sup>a</sup>**

| Observed           |                                                    |                                                              |
|--------------------|----------------------------------------------------|--------------------------------------------------------------|
| Step 1             | seorauslt3 seuraus highest = haitta (i någon form) | 0 ingen händelse eller ei haittaa<br>1 haitta (i någon form) |
| Overall Percentage |                                                    |                                                              |

**Classification Table<sup>a</sup>**

| Observed           |                                                    |                                                              | Predicted                         |
|--------------------|----------------------------------------------------|--------------------------------------------------------------|-----------------------------------|
|                    |                                                    |                                                              | seorauslt3 seuraus highest        |
|                    |                                                    |                                                              | 0 ingen händelse eller ei haittaa |
| Step 1             | seorauslt3 seuraus highest = haitta (i någon form) | 0 ingen händelse eller ei haittaa<br>1 haitta (i någon form) | 12075<br>400                      |
| Overall Percentage |                                                    |                                                              |                                   |

**Classification Table<sup>a</sup>**

| Observed           |                                                    |                                                              | Predicted                     |
|--------------------|----------------------------------------------------|--------------------------------------------------------------|-------------------------------|
|                    |                                                    |                                                              | seorauslt3 seuraus highest .. |
|                    |                                                    |                                                              | 1 haitta (i någon form)       |
| Step 1             | seorauslt3 seuraus highest = haitta (i någon form) | 0 ingen händelse eller ei haittaa<br>1 haitta (i någon form) | 0<br>0                        |
| Overall Percentage |                                                    |                                                              |                               |

Classification Table<sup>a</sup>

|                    |                                                   |                                   | Predicted          |
|--------------------|---------------------------------------------------|-----------------------------------|--------------------|
| Observed           |                                                   |                                   | Percentage Correct |
| Step 1             | seuraust3 seuraus highest = haitta (i någon form) | 0 ingen händelse eller ei haittaa | 100,0              |
|                    |                                                   | 1 haitta (i någon form)           | ,0                 |
| Overall Percentage |                                                   |                                   | 96,8               |

a. The cut value is ,500

Variables in the Equation

|                     |          | B      | S.E. | Wald    | df | Sig. | Exp(B) | 95% C.I.. |
|---------------------|----------|--------|------|---------|----|------|--------|-----------|
|                     |          | Lower  |      |         |    |      |        |           |
| Step 1 <sup>a</sup> | sv5      |        |      | 17,247  | 4  | ,002 |        |           |
|                     | sv5(1)   | -,140  | ,173 | ,654    | 1  | ,419 | ,870   | ,620      |
|                     | sv5(2)   | -,147  | ,204 | ,522    | 1  | ,470 | ,863   | ,579      |
|                     | sv5(3)   | ,220   | ,176 | 1,566   | 1  | ,211 | 1,246  | ,883      |
|                     | sv5(4)   | ,356   | ,165 | 4,649   | 1  | ,031 | 1,427  | 1,033     |
|                     | Constant | -3,493 | ,137 | 651,114 | 1  | ,000 | ,030   |           |

Variables in the Equation

|                     |          | 95% C.I.... |
|---------------------|----------|-------------|
|                     |          | Upper       |
| Step 1 <sup>a</sup> | sv5      |             |
|                     | sv5(1)   | 1,220       |
|                     | sv5(2)   | 1,287       |
|                     | sv5(3)   | 1,759       |
|                     | sv5(4)   | 1,972       |
|                     | Constant |             |

a. Variable(s) entered on step 1: sv5.

```
LOGISTIC REGRESSION VARIABLES seurauslt3
/METHOD=ENTER sv7
/CONTRAST (sv7)=Indicator(1)
/PRINT=CI(95)
/CRITERIA=PIN(0.05) POUT(0.10) ITERATE(20) CUT(0.5).
```

## Logistic Regression

[DataSet6] C:\cWordjan\Rafaela\_VCS\alla\_tillsammans\abo\_bjo\_vasa\_v1.sav



**Case Processing Summary**

| Unweighted Cases <sup>a</sup> |                      | N     | Percent |
|-------------------------------|----------------------|-------|---------|
| Selected Cases                | Included in Analysis | 12475 | 100,0   |
|                               | Missing Cases        | 0     | ,0      |
|                               | Total                | 12475 | 100,0   |
| Unselected Cases              |                      | 0     | ,0      |
| Total                         |                      | 12475 | 100,0   |

a. If weight is in effect, see classification table for the total number of cases.

**Dependent Variable Encoding**

| Original Value                    | Internal Value |
|-----------------------------------|----------------|
| 0 ingen händelse eller ei haittaa | 0              |
| 1 haitta (i någon form)           | 1              |

**Categorical Variables Codings**

|                              |                      | Frequency | Parameter coding |       |       |
|------------------------------|----------------------|-----------|------------------|-------|-------|
|                              |                      |           | (1)              | (2)   | (3)   |
| sv7 sjättedelar för standard | 1 fjärde sjundedelen | 1423      | ,000             | ,000  | ,000  |
|                              | 2 första sjundedelen | 3031      | 1,000            | ,000  | ,000  |
|                              | 3 andra sjundedelen  | 1238      | ,000             | 1,000 | ,000  |
|                              | 4 tredje sjundedelen | 1255      | ,000             | ,000  | 1,000 |
|                              | 5 femte sjundedelen  | 1445      | ,000             | ,000  | ,000  |
|                              | 6 sjätte sjundedelen | 1948      | ,000             | ,000  | ,000  |
|                              | 7 sjunde sjundedelen | 2135      | ,000             | ,000  | ,000  |

**Categorical Variables Codings**

|                              |                      | Parameter coding |       |       |
|------------------------------|----------------------|------------------|-------|-------|
|                              |                      | (4)              | (5)   | (6)   |
| sv7 sjättedelar för standard | 1 fjärde sjundedelen | ,000             | ,000  | ,000  |
|                              | 2 första sjundedelen | ,000             | ,000  | ,000  |
|                              | 3 andra sjundedelen  | ,000             | ,000  | ,000  |
|                              | 4 tredje sjundedelen | ,000             | ,000  | ,000  |
|                              | 5 femte sjundedelen  | 1,000            | ,000  | ,000  |
|                              | 6 sjätte sjundedelen | ,000             | 1,000 | ,000  |
|                              | 7 sjunde sjundedelen | ,000             | ,000  | 1,000 |

**Block 0: Beginning Block**

Classification Table<sup>a,b</sup>

| Observed           |                                                   |                                                              |
|--------------------|---------------------------------------------------|--------------------------------------------------------------|
| Step 0             | seuraust3 seuraus highest = haitta (i någon form) | 0 ingen händelse eller ei haittaa<br>1 haitta (i någon form) |
| Overall Percentage |                                                   |                                                              |

Classification Table<sup>a,b</sup>

| Observed           |                                                   |                                                              | Predicted                         |
|--------------------|---------------------------------------------------|--------------------------------------------------------------|-----------------------------------|
|                    |                                                   |                                                              | seuraust3 seuraus highest         |
|                    |                                                   |                                                              | 0 ingen händelse eller ei haittaa |
| Step 0             | seuraust3 seuraus highest = haitta (i någon form) | 0 ingen händelse eller ei haittaa<br>1 haitta (i någon form) | 12075<br>400                      |
| Overall Percentage |                                                   |                                                              |                                   |

Classification Table<sup>a,b</sup>

| Observed           |                                                   |                                                              | Predicted                    |
|--------------------|---------------------------------------------------|--------------------------------------------------------------|------------------------------|
|                    |                                                   |                                                              | seuraust3 seuraus highest .. |
|                    |                                                   |                                                              | 1 haitta (i någon form)      |
| Step 0             | seuraust3 seuraus highest = haitta (i någon form) | 0 ingen händelse eller ei haittaa<br>1 haitta (i någon form) | 0<br>0                       |
| Overall Percentage |                                                   |                                                              |                              |

Classification Table<sup>a,b</sup>

| Observed           |                                                   |                                                              | Predicted          |
|--------------------|---------------------------------------------------|--------------------------------------------------------------|--------------------|
|                    |                                                   |                                                              | Percentage Correct |
| Step 0             | seuraust3 seuraus highest = haitta (i någon form) | 0 ingen händelse eller ei haittaa<br>1 haitta (i någon form) | 100,0<br>,0        |
| Overall Percentage |                                                   |                                                              | 96,8               |

a. Constant is included in the model.

b. The cut value is ,500

**Variables in the Equation**

|                 | B      | S.E. | Wald     | df | Sig. | Exp(B) |
|-----------------|--------|------|----------|----|------|--------|
| Step 0 Constant | -3,407 | ,051 | 4495,313 | 1  | ,000 | ,033   |

**Variables not in the Equation**

|                      | Score  | df | Sig. |
|----------------------|--------|----|------|
| Step 0 Variables sv7 | 16,156 | 6  | ,013 |
| sv7(1)               | 7,549  | 1  | ,006 |
| sv7(2)               | 2,716  | 1  | ,099 |
| sv7(3)               | ,300   | 1  | ,584 |
| sv7(4)               | 1,121  | 1  | ,290 |
| sv7(5)               | 3,082  | 1  | ,079 |
| sv7(6)               | 4,983  | 1  | ,026 |
| Overall Statistics   | 16,156 | 6  | ,013 |

**Block 1: Method = Enter**

**Omnibus Tests of Model Coefficients**

|             | Chi-square | df | Sig. |
|-------------|------------|----|------|
| Step 1 Step | 16,401     | 6  | ,012 |
| Block       | 16,401     | 6  | ,012 |
| Model       | 16,401     | 6  | ,012 |

**Model Summary**

| Step | -2 Log likelihood     | Cox & Snell R Square | Nagelkerke R Square |
|------|-----------------------|----------------------|---------------------|
| 1    | 3522,648 <sup>a</sup> | ,001                 | ,005                |

a. Estimation terminated at iteration number 6 because parameter estimates changed by less than ,001.

**Classification Table<sup>a</sup>**

| Observed           |                                                    |                                                              |
|--------------------|----------------------------------------------------|--------------------------------------------------------------|
| Step 1             | seurauslt3 seuraus highest = haitta (i någon form) | 0 ingen händelse eller ei haittaa<br>1 haitta (i någon form) |
| Overall Percentage |                                                    |                                                              |

Classification Table<sup>a</sup>

| Observed           |                                                    | Predicted                         |                                   |
|--------------------|----------------------------------------------------|-----------------------------------|-----------------------------------|
|                    |                                                    | seurauslt3 seuraus highest        | 0 ingen händelse eller ei haittaa |
| Step 1             | seurauslt3 seuraus highest = haitta (i någon form) | 0 ingen händelse eller ei haittaa | 12075                             |
|                    |                                                    | 1 haitta (i någon form)           | 400                               |
| Overall Percentage |                                                    |                                   |                                   |

Classification Table<sup>a</sup>

| Observed           |                                                    | Predicted                         |                         |
|--------------------|----------------------------------------------------|-----------------------------------|-------------------------|
|                    |                                                    | seurauslt3 seuraus highest ..     | 1 haitta (i någon form) |
| Step 1             | seurauslt3 seuraus highest = haitta (i någon form) | 0 ingen händelse eller ei haittaa | 0                       |
|                    |                                                    | 1 haitta (i någon form)           | 0                       |
| Overall Percentage |                                                    |                                   |                         |

Classification Table<sup>a</sup>

| Observed           |                                                    | Predicted                         |       |
|--------------------|----------------------------------------------------|-----------------------------------|-------|
|                    |                                                    | Percentage Correct                |       |
| Step 1             | seurauslt3 seuraus highest = haitta (i någon form) | 0 ingen händelse eller ei haittaa | 100,0 |
|                    |                                                    | 1 haitta (i någon form)           | ,0    |
| Overall Percentage |                                                    |                                   | 96,8  |

a. The cut value is ,500

Variables in the Equation

|                     | B      | S.E. | Wald    | df | Sig. | Exp(B) | 95% C.I.. |
|---------------------|--------|------|---------|----|------|--------|-----------|
|                     |        |      |         |    |      |        | Lower     |
| Step 1 <sup>a</sup> |        |      | 15,922  | 6  | ,014 |        |           |
| sv7                 |        |      |         |    |      |        |           |
| sv7(1)              | -,289  | ,191 | 2,297   | 1  | ,130 | ,749   | ,516      |
| sv7(2)              | -,297  | ,238 | 1,553   | 1  | ,213 | ,743   | ,466      |
| sv7(3)              | -,095  | ,224 | ,179    | 1  | ,672 | ,909   | ,586      |
| sv7(4)              | ,131   | ,205 | ,407    | 1  | ,524 | 1,140  | ,763      |
| sv7(5)              | ,181   | ,191 | ,904    | 1  | ,342 | 1,199  | ,825      |
| sv7(6)              | ,216   | ,186 | 1,345   | 1  | ,246 | 1,241  | ,861      |
| Constant            | -3,399 | ,150 | 514,274 | 1  | ,000 | ,033   |           |

## Variables in the Equation

|                     |          | 95% C.I.... |
|---------------------|----------|-------------|
|                     |          | Upper       |
| Step 1 <sup>a</sup> | sv7      |             |
|                     | sv7(1)   | 1,088       |
|                     | sv7(2)   | 1,185       |
|                     | sv7(3)   | 1,411       |
|                     | sv7(4)   | 1,704       |
|                     | sv7(5)   | 1,742       |
|                     | sv7(6)   | 1,788       |
|                     | Constant |             |

a. Variable(s) entered on step 1: sv7.

\*\*

```
LOGISTIC REGRESSION VARIABLES handlt1
  /METHOD=ENTER bv1
  /CONTRAST (bv1)=Indicator(1)
  /PRINT=CI(95)
  /CRITERIA=PIN(0.05) POUT(0.10) ITERATE(20) CUT(0.5).
```

## Logistic Regression

[DataSet6] C:\cWordjan\Rafaela\_VCS\alla\_tillsammans\abo\_bjo\_vasa\_v1.sav

### Case Processing Summary

| Unweighted Cases <sup>a</sup> |                      | N     | Percent |
|-------------------------------|----------------------|-------|---------|
| Selected Cases                | Included in Analysis | 12475 | 100,0   |
|                               | Missing Cases        | 0     | ,0      |
|                               | Total                | 12475 | 100,0   |
| Unselected Cases              |                      | 0     | ,0      |
| Total                         |                      | 12475 | 100,0   |

a. If weight is in effect, see classification table for the total number of cases.

### Dependent Variable Encoding

| Original Value            | Internal Value |
|---------------------------|----------------|
| 0 ingen eller en händelse | 0              |
| 1 mer än en händelse      | 1              |

## Categorical Variables Codings

|                                             | Frequency | Parameter coding |       |
|---------------------------------------------|-----------|------------------|-------|
|                                             |           | (1)              | (2)   |
| bv1 belastning vs paencil 1 medelbelastning | 5380      | ,000             | ,000  |
| 2 underbelastning                           | 3222      | 1,000            | ,000  |
| 3 överbelastning                            | 3873      | ,000             | 1,000 |

## Block 0: Beginning Block

Classification Table<sup>a,b</sup>

| Observed           |                                | Predicted                      |                      |
|--------------------|--------------------------------|--------------------------------|----------------------|
|                    |                                | handlt1 händelse larger than 1 |                      |
|                    |                                | 0 ingen eller en händelse      | 1 mer än en händelse |
| Step 0             | handlt1 händelse larger than 1 | 12229                          | 0                    |
|                    | 0 ingen eller en händelse      |                                | 0                    |
|                    | 1 mer än en händelse           | 246                            | 0                    |
| Overall Percentage |                                |                                |                      |

Classification Table<sup>a,b</sup>

| Observed           |                                | Predicted          |
|--------------------|--------------------------------|--------------------|
|                    |                                | Percentage Correct |
| Step 0             | handlt1 händelse larger than 1 | 100,0              |
|                    | 0 ingen eller en händelse      | ,0                 |
|                    | 1 mer än en händelse           |                    |
| Overall Percentage |                                | 98,0               |

a. Constant is included in the model.

b. The cut value is ,500

## Variables in the Equation

|                 | B      | S.E. | Wald     | df | Sig. | Exp(B) |
|-----------------|--------|------|----------|----|------|--------|
| Step 0 Constant | -3,906 | ,064 | 3679,612 | 1  | ,000 | ,020   |

## Variables not in the Equation

|                      | Score  | df | Sig. |
|----------------------|--------|----|------|
| Step 0 Variables bv1 | 11,924 | 2  | ,003 |
| bv1(1)               | 9,129  | 1  | ,003 |
| bv1(2)               | 7,462  | 1  | ,006 |
| Overall Statistics   | 11,924 | 2  | ,003 |

## Block 1: Method = Enter

## Omnibus Tests of Model Coefficients

|        |       | Chi-square | df | Sig. |
|--------|-------|------------|----|------|
| Step 1 | Step  | 12,400     | 2  | ,002 |
|        | Block | 12,400     | 2  | ,002 |
|        | Model | 12,400     | 2  | ,002 |

## Model Summary

| Step | -2 Log likelihood     | Cox & Snell R Square | Nagelkerke R Square |
|------|-----------------------|----------------------|---------------------|
| 1    | 2406,383 <sup>a</sup> | ,001                 | ,006                |

a. Estimation terminated at iteration number 7 because parameter estimates changed by less than ,001.

Classification Table<sup>a</sup>

|                    |                                | Predicted                      |                      |
|--------------------|--------------------------------|--------------------------------|----------------------|
|                    |                                | handlt1 händelse larger than 1 |                      |
| Observed           |                                | 0 ingen eller en händelse      | 1 mer än en händelse |
| Step 1             | handlt1 händelse larger than 1 | 12229                          | 0                    |
|                    |                                | 246                            | 0                    |
| Overall Percentage |                                |                                |                      |

Classification Table<sup>a</sup>

|                    |                                | Predicted                 |                      |
|--------------------|--------------------------------|---------------------------|----------------------|
|                    |                                | Percentage Correct        |                      |
| Observed           |                                | 0 ingen eller en händelse | 1 mer än en händelse |
| Step 1             | handlt1 händelse larger than 1 | 100,0                     | ,0                   |
|                    |                                |                           |                      |
| Overall Percentage |                                | 98,0                      |                      |

a. The cut value is ,500

## Variables in the Equation

|                     |          | B      | S.E. | Wald     | df | Sig. | Exp(B) | 95% C.I.. |
|---------------------|----------|--------|------|----------|----|------|--------|-----------|
|                     |          | Lower  |      |          |    |      |        |           |
| Step 1 <sup>a</sup> | bv1      |        |      | 11,665   | 2  | ,003 |        |           |
|                     | bv1(1)   | -,406  | ,182 | 4,969    | 1  | ,026 | ,667   | ,467      |
|                     | bv1(2)   | ,225   | ,142 | 2,508    | 1  | ,113 | 1,253  | ,948      |
|                     | Constant | -3,898 | ,098 | 1593,079 | 1  | ,000 | ,020   |           |

## Variables in the Equation

|                     |          | 95% C.I.... |
|---------------------|----------|-------------|
|                     |          | Upper       |
| Step 1 <sup>a</sup> | bv1      |             |
|                     | bv1(1)   | ,952        |
|                     | bv1(2)   | 1,655       |
|                     | Constant |             |

a. Variable(s) entered on step 1: bv1.

```
LOGISTIC REGRESSION VARIABLES handlt1
/METHOD=ENTER bv2
/CONTRAST (bv2)=Indicator(1)
/PRINT=CI(95)
/CRITERIA=PIN(0.05) POUT(0.10) ITERATE(20) CUT(0.5).
```

## Logistic Regression

[DataSet6] C:\cWordjan\Rafaela\_VCS\alla\_tillsammans\abo\_bjo\_vasa\_v1.sav

## Case Processing Summary

| Unweighted Cases <sup>a</sup> |                      | N     | Percent |
|-------------------------------|----------------------|-------|---------|
| Selected Cases                | Included in Analysis | 12475 | 100,0   |
|                               | Missing Cases        | 0     | ,0      |
|                               | Total                | 12475 | 100,0   |
| Unselected Cases              |                      | 0     | ,0      |
| Total                         |                      | 12475 | 100,0   |

a. If weight is in effect, see classification table for the total number of cases.

## Dependent Variable Encoding

| Original Value            | Internal Value |
|---------------------------|----------------|
| 0 ingen eller en händelse | 0              |
| 1 mer än en händelse      | 1              |

## Categorical Variables Codings

|                                             |                   | Frequency | Parameter coding |       |
|---------------------------------------------|-------------------|-----------|------------------|-------|
|                                             |                   |           | (1)              | (2)   |
| bv2 belastning vs paencil halva intervallet | 1 medelbelastning | 2788      | ,000             | ,000  |
|                                             | 2 underbelastning | 4419      | 1,000            | ,000  |
|                                             | 3 överbelastning  | 5268      | ,000             | 1,000 |

## Block 0: Beginning Block



**Classification Table<sup>a,b</sup>**

| Observed           |                                | Predicted                      |                      |
|--------------------|--------------------------------|--------------------------------|----------------------|
|                    |                                | handlt1 händelse larger than 1 |                      |
|                    |                                | 0 ingen eller en händelse      | 1 mer än en händelse |
| Step 0             | handlt1 händelse larger than 1 | 12229                          | 0                    |
|                    |                                | 246                            | 0                    |
| Overall Percentage |                                |                                |                      |

**Classification Table<sup>a,b</sup>**

| Observed           |                                | Predicted          |  |
|--------------------|--------------------------------|--------------------|--|
|                    |                                | Percentage Correct |  |
|                    |                                |                    |  |
| Step 0             | handlt1 händelse larger than 1 | 100,0              |  |
|                    |                                | ,0                 |  |
| Overall Percentage |                                | 98,0               |  |

a. Constant is included in the model.

b. The cut value is ,500

**Variables in the Equation**

|                 | B      | S.E. | Wald     | df | Sig. | Exp(B) |
|-----------------|--------|------|----------|----|------|--------|
| Step 0 Constant | -3,906 | ,064 | 3679,612 | 1  | ,000 | ,020   |

**Variables not in the Equation**

|                    | Score  | df    | Sig. |
|--------------------|--------|-------|------|
| Step 0 Variables   |        |       |      |
|                    | bv2    | 9,226 | 2    |
|                    | bv2(1) | 8,102 | 1    |
|                    | bv2(2) | 6,880 | 1    |
| Overall Statistics | 9,226  | 2     | ,010 |

**Block 1: Method = Enter**

**Omnibus Tests of Model Coefficients**

|             | Chi-square | df | Sig. |
|-------------|------------|----|------|
| Step 1 Step | 9,470      | 2  | ,009 |
| Block       | 9,470      | 2  | ,009 |
| Model       | 9,470      | 2  | ,009 |

**Model Summary**

| Step | -2 Log likelihood     | Cox & Snell R Square | Nagelkerke R Square |
|------|-----------------------|----------------------|---------------------|
| 1    | 2409,313 <sup>a</sup> | ,001                 | ,004                |

a. Estimation terminated at iteration number 7 because parameter estimates changed by less than ,001.

Classification Table<sup>a</sup>

| Observed           |                                |                           | Predicted                 |                      |
|--------------------|--------------------------------|---------------------------|---------------------------|----------------------|
|                    |                                |                           | 0 ingen eller en händelse | 1 mer än en händelse |
| Step 1             | handlt1 händelse larger than 1 | 0 ingen eller en händelse | 12229                     | 0                    |
|                    |                                | 1 mer än en händelse      | 246                       | 0                    |
| Overall Percentage |                                |                           |                           |                      |

Classification Table<sup>a</sup>

| Observed           |                                |                           | Predicted          |
|--------------------|--------------------------------|---------------------------|--------------------|
|                    |                                |                           | Percentage Correct |
| Step 1             | handlt1 händelse larger than 1 | 0 ingen eller en händelse | 100,0              |
|                    |                                | 1 mer än en händelse      | ,0                 |
| Overall Percentage |                                |                           | 98,0               |

a. The cut value is ,500

Variables in the Equation

|                         | B      | S.E. | Wald    | df | Sig. | Exp(B) | 95% C.I. |
|-------------------------|--------|------|---------|----|------|--------|----------|
|                         |        |      |         |    |      |        | Lower    |
| Step 1 <sup>a</sup> bv2 |        |      | 9,094   | 2  | ,011 |        |          |
|                         | -,302  | ,183 | 2,706   | 1  | ,100 | ,740   | ,516     |
|                         | ,162   | ,163 | ,993    | 1  | ,319 | 1,176  | ,855     |
| Constant                | -3,887 | ,135 | 829,283 | 1  | ,000 | ,020   |          |

Variables in the Equation

|                         |          | 95% C.I.... |
|-------------------------|----------|-------------|
|                         |          | Upper       |
| Step 1 <sup>a</sup> bv2 |          |             |
|                         | bv2(1)   | 1,059       |
|                         | bv2(2)   | 1,618       |
|                         | Constant |             |

a. Variable(s) entered on step 1: bv2.

```
LOGISTIC REGRESSION VARIABLES handlt1
/METHOD=ENTER bv3
/CONTRAST (bv3)=Indicator(1)
/PRINT=CI(95)
/CRITERIA=PIN(0.05) POUT(0.10) ITERATE(20) CUT(0.5).
```

## Logistic Regression

[DataSet6] C:\cWordjan\Rafaela\_VCS\alla\_tillsammans\abo\_bjo\_vasa\_v1.sav

### Case Processing Summary

| Unweighted Cases <sup>a</sup> |                      | N     | Percent |
|-------------------------------|----------------------|-------|---------|
| Selected Cases                | Included in Analysis | 12475 | 100,0   |
|                               | Missing Cases        | 0     | ,0      |
|                               | Total                | 12475 | 100,0   |
| Unselected Cases              |                      | 0     | ,0      |
| Total                         |                      | 12475 | 100,0   |

a. If weight is in effect, see classification table for the total number of cases.

### Dependent Variable Encoding

| Original Value            | Internal Value |
|---------------------------|----------------|
| 0 ingen eller en händelse | 0              |
| 1 mer än en händelse      | 1              |

### Categorical Variables Codings

|                                              | Frequency         | Parameter coding |       |
|----------------------------------------------|-------------------|------------------|-------|
|                                              |                   | (1)              | (2)   |
| bv3 belasnting vs paoncil dubbla intervallet | 1 medelbelastning | 9121             | ,000  |
|                                              | 2 underbelastning | 1505             | 1,000 |
|                                              | 3 överbelastning  | 1849             | ,000  |

## Block 0: Beginning Block

### Classification Table<sup>a,b</sup>

| Observed           |                                |                           | Predicted                      |                      |
|--------------------|--------------------------------|---------------------------|--------------------------------|----------------------|
|                    |                                |                           | handlt1 händelse larger than 1 |                      |
|                    |                                |                           | 0 ingen eller en händelse      | 1 mer än en händelse |
| Step 0             | handlt1 händelse larger than 1 | 0 ingen eller en händelse | 12229                          | 0                    |
|                    |                                | 1 mer än en händelse      | 246                            | 0                    |
| Overall Percentage |                                |                           |                                |                      |

### Classification Table<sup>a,b</sup>

| Observed           |                                |                           | Predicted          |
|--------------------|--------------------------------|---------------------------|--------------------|
|                    |                                |                           | Percentage Correct |
| Step 0             | handlt1 händelse larger than 1 | 0 ingen eller en händelse | 100,0              |
|                    |                                | 1 mer än en händelse      | ,0                 |
| Overall Percentage |                                |                           | 98,0               |

a. Constant is included in the model.

b. The cut value is ,500

## Variables in the Equation

|                 | B      | S.E. | Wald     | df | Sig. | Exp(B) |
|-----------------|--------|------|----------|----|------|--------|
| Step 0 Constant | -3,906 | ,064 | 3679,612 | 1  | ,000 | ,020   |

## Variables not in the Equation

|                    | Score | df | Sig. |
|--------------------|-------|----|------|
| Step 0 Variables   |       |    |      |
| bv3                | 5,341 | 2  | ,069 |
| bv3(1)             | 5,331 | 1  | ,021 |
| bv3(2)             | ,212  | 1  | ,645 |
| Overall Statistics | 5,341 | 2  | ,069 |

## Block 1: Method = Enter

## Omnibus Tests of Model Coefficients

|             | Chi-square | df | Sig. |
|-------------|------------|----|------|
| Step 1 Step | 6,089      | 2  | ,048 |
| Block       | 6,089      | 2  | ,048 |
| Model       | 6,089      | 2  | ,048 |

## Model Summary

| Step | -2 Log likelihood     | Cox & Snell R Square | Nagelkerke R Square |
|------|-----------------------|----------------------|---------------------|
| 1    | 2412,694 <sup>a</sup> | ,000                 | ,003                |

a. Estimation terminated at iteration number 7 because parameter estimates changed by less than ,001.

Classification Table<sup>a</sup>

|                    |                                | Predicted                      |                      |
|--------------------|--------------------------------|--------------------------------|----------------------|
|                    |                                | handlt1 händelse larger than 1 |                      |
| Observed           |                                | 0 ingen eller en händelse      | 1 mer än en händelse |
| Step 1             | handlt1 händelse larger than 1 | 12229                          | 0                    |
|                    |                                | 246                            | 0                    |
| Overall Percentage |                                |                                |                      |

Classification Table<sup>a</sup>

|                    |                                | Predicted          |
|--------------------|--------------------------------|--------------------|
|                    |                                | Percentage Correct |
| Observed           |                                |                    |
| Step 1             | handlt1 händelse larger than 1 | 100,0              |
|                    |                                | ,0                 |
| Overall Percentage |                                | 98,0               |

a. The cut value is ,500

## Variables in the Equation

|                         | B      | S.E. | Wald     | df | Sig. | Exp(B) | 95% C.I.. |
|-------------------------|--------|------|----------|----|------|--------|-----------|
|                         |        |      |          |    |      |        | Lower     |
| Step 1 <sup>a</sup> bv3 |        |      | 5,206    | 2  | ,074 |        |           |
| bv3(1)                  | -,558  | ,248 | 5,061    | 1  | ,024 | ,572   | ,352      |
| bv3(2)                  | ,018   | ,178 | ,010     | 1  | ,919 | 1,018  | ,719      |
| Constant                | -3,856 | ,074 | 2751,458 | 1  | ,000 | ,021   |           |

## Variables in the Equation

|                         | 95% C.I.... |
|-------------------------|-------------|
|                         | Upper       |
| Step 1 <sup>a</sup> bv3 |             |
| bv3(1)                  | ,931        |
| bv3(2)                  | 1,443       |
| Constant                |             |

a. Variable(s) entered on step 1: bv3.

```
LOGISTIC REGRESSION VARIABLES handlt1
  /METHOD=ENTER sv3
  /CONTRAST (sv3)=Indicator(1)
  /PRINT=CI(95)
  /CRITERIA=PIN(0.05) POUT(0.10) ITERATE(20) CUT(0.5).
```

## Logistic Regression

[DataSet6] C:\cWordjan\Rafaela\_VCS\alla\_tillsammans\abo\_bjo\_vasa\_v1.sav

### Case Processing Summary

| Unweighted Cases <sup>a</sup> |                      | N     | Percent |
|-------------------------------|----------------------|-------|---------|
| Selected Cases                | Included in Analysis | 12475 | 100,0   |
|                               | Missing Cases        | 0     | ,0      |
|                               | Total                | 12475 | 100,0   |
| Unselected Cases              |                      | 0     | ,0      |
| Total                         |                      | 12475 | 100,0   |

a. If weight is in effect, see classification table for the total number of cases.

### Dependent Variable Encoding

| Original Value            | Internal Value |
|---------------------------|----------------|
| 0 ingen eller en händelse | 0              |
| 1 mer än en händelse      | 1              |

## Categorical Variables Codings

|                              | Frequency | Parameter coding |       |
|------------------------------|-----------|------------------|-------|
|                              |           | (1)              | (2)   |
| sv3 tredjedelar för standard | 3172      | ,000             | ,000  |
| 1 andra tredjedelen          | 4718      | 1,000            | ,000  |
| 2 första tredjedelen         | 4585      | ,000             | 1,000 |
| 3 tredje tredjedelen         |           |                  |       |

## Block 0: Beginning Block

Classification Table<sup>a,b</sup>

| Observed           |                                | Predicted                      |                      |
|--------------------|--------------------------------|--------------------------------|----------------------|
|                    |                                | handlt1 händelse larger than 1 |                      |
|                    |                                | 0 ingen eller en händelse      | 1 mer än en händelse |
| Step 0             | handlt1 händelse larger than 1 | 12229                          | 0                    |
|                    | 0 ingen eller en händelse      |                                | 0                    |
|                    | 1 mer än en händelse           | 246                            | 0                    |
| Overall Percentage |                                |                                |                      |

Classification Table<sup>a,b</sup>

| Observed           |                                | Predicted          |
|--------------------|--------------------------------|--------------------|
|                    |                                | Percentage Correct |
| Step 0             | handlt1 händelse larger than 1 | 100,0              |
|                    | 0 ingen eller en händelse      | ,0                 |
|                    | 1 mer än en händelse           |                    |
| Overall Percentage |                                | 98,0               |

a. Constant is included in the model.

b. The cut value is ,500

## Variables in the Equation

|                 | B      | S.E. | Wald     | df | Sig. | Exp(B) |
|-----------------|--------|------|----------|----|------|--------|
| Step 0 Constant | -3,906 | ,064 | 3679,612 | 1  | ,000 | ,020   |

## Variables not in the Equation

|                      | Score | df | Sig. |
|----------------------|-------|----|------|
| Step 0 Variables sv3 | 2,251 | 2  | ,324 |
| sv3(1)               | 2,148 | 1  | ,143 |
| sv3(2)               | ,375  | 1  | ,540 |
| Overall Statistics   | 2,251 | 2  | ,324 |

## Block 1: Method = Enter

## Omnibus Tests of Model Coefficients

|        |       | Chi-square | df | Sig. |
|--------|-------|------------|----|------|
| Step 1 | Step  | 2,281      | 2  | ,320 |
|        | Block | 2,281      | 2  | ,320 |
|        | Model | 2,281      | 2  | ,320 |

## Model Summary

| Step | -2 Log likelihood     | Cox & Snell R Square | Nagelkerke R Square |
|------|-----------------------|----------------------|---------------------|
| 1    | 2416,502 <sup>a</sup> | ,000                 | ,001                |

a. Estimation terminated at iteration number 7 because parameter estimates changed by less than ,001.

Classification Table<sup>a</sup>

|                    |                               |                           | Predicted                     |                      |
|--------------------|-------------------------------|---------------------------|-------------------------------|----------------------|
|                    |                               |                           | handt1 händelse larger than 1 |                      |
| Observed           |                               |                           | 0 ingen eller en händelse     | 1 mer än en händelse |
| Step 1             | handt1 händelse larger than 1 | 0 ingen eller en händelse | 12229                         | 0                    |
|                    |                               | 1 mer än en händelse      | 246                           | 0                    |
| Overall Percentage |                               |                           |                               |                      |

Classification Table<sup>a</sup>

|                    |                               |                           | Predicted          |
|--------------------|-------------------------------|---------------------------|--------------------|
|                    |                               |                           | Percentage Correct |
| Observed           |                               |                           |                    |
| Step 1             | handt1 händelse larger than 1 | 0 ingen eller en händelse | 100,0              |
|                    |                               | 1 mer än en händelse      | ,0                 |
| Overall Percentage |                               |                           | 98,0               |

a. The cut value is ,500

## Variables in the Equation

|                     |          | B      | S.E. | Wald    | df | Sig. | Exp(B) | 95% C.I.. |
|---------------------|----------|--------|------|---------|----|------|--------|-----------|
|                     |          | Lower  |      |         |    |      |        |           |
| Step 1 <sup>a</sup> | sv3      |        |      | 2,244   | 2  | ,326 |        |           |
|                     | sv3(1)   | -,229  | ,165 | 1,924   | 1  | ,165 | ,795   | ,576      |
|                     | sv3(2)   | -,050  | ,160 | ,097    | 1  | ,756 | ,952   | ,696      |
|                     | Constant | -3,806 | ,122 | 977,776 | 1  | ,000 | ,022   |           |

## Variables in the Equation

|                     |          | 95% C.I.... |
|---------------------|----------|-------------|
|                     |          | Upper       |
| Step 1 <sup>a</sup> | sv3      |             |
|                     | sv3(1)   | 1,099       |
|                     | sv3(2)   | 1,302       |
|                     | Constant |             |

a. Variable(s) entered on step 1: sv3.

LOGISTIC REGRESSION VARIABLES handlt1

/METHOD=ENTER sv5

/CONTRAST (sv5)=Indicator(1)

/PRINT=CI(95)

/CRITERIA=PIN(0.05) POUT(0.10) ITERATE(20) CUT(0.5).

## Logistic Regression

[DataSet6] C:\cWordjan\Rafaela\_VCS\alla\_tillsammans\abo\_bjo\_vasa\_v1.sav

## Case Processing Summary

| Unweighted Cases <sup>a</sup> |                      | N     | Percent |
|-------------------------------|----------------------|-------|---------|
| Selected Cases                | Included in Analysis | 12475 | 100,0   |
|                               | Missing Cases        | 0     | ,0      |
|                               | Total                | 12475 | 100,0   |
| Unselected Cases              |                      | 0     | ,0      |
| Total                         |                      | 12475 | 100,0   |

a. If weight is in effect, see classification table for the total number of cases.

## Dependent Variable Encoding

| Original Value            | Internal Value |
|---------------------------|----------------|
| 0 ingen eller en händelse | 0              |
| 1 mer än en händelse      | 1              |

## Categorical Variables Codings

|                            |                    | Frequency | Parameter coding |       |       |       |
|----------------------------|--------------------|-----------|------------------|-------|-------|-------|
|                            |                    |           | (1)              | (2)   | (3)   | (4)   |
| sv5 kvintiler för standard | 1 tredje kvintilen | 1863      | ,000             | ,000  | ,000  | ,000  |
|                            | 2 första kvintilen | 3570      | 1,000            | ,000  | ,000  | ,000  |
|                            | 3 andra kvintilen  | 1759      | ,000             | 1,000 | ,000  | ,000  |
|                            | 4 fjärde kvintilen | 2327      | ,000             | ,000  | 1,000 | ,000  |
|                            | 5 femte kvintilen  | 2956      | ,000             | ,000  | ,000  | 1,000 |

## Block 0: Beginning Block



Classification Table<sup>a,b</sup>

| Observed           |                                |                           | Predicted                 |                      |
|--------------------|--------------------------------|---------------------------|---------------------------|----------------------|
|                    |                                |                           | 0 ingen eller en händelse | 1 mer än en händelse |
| Step 0             | handlt1 händelse larger than 1 | 0 ingen eller en händelse | 12229                     | 0                    |
|                    |                                | 1 mer än en händelse      | 246                       | 0                    |
| Overall Percentage |                                |                           |                           |                      |

Classification Table<sup>a,b</sup>

| Observed           |                                |                           | Predicted          |
|--------------------|--------------------------------|---------------------------|--------------------|
|                    |                                |                           | Percentage Correct |
| Step 0             | handlt1 händelse larger than 1 | 0 ingen eller en händelse | 100,0              |
|                    |                                | 1 mer än en händelse      | ,0                 |
| Overall Percentage |                                |                           | 98,0               |

a. Constant is included in the model.

b. The cut value is ,500

Variables in the Equation

|                 | B      | S.E. | Wald     | df | Sig. | Exp(B) |
|-----------------|--------|------|----------|----|------|--------|
| Step 0 Constant | -3,906 | ,064 | 3679,612 | 1  | ,000 | ,020   |

Variables not in the Equation

|                      | Score | df | Sig. |
|----------------------|-------|----|------|
| Step 0 Variables sv5 | 3,960 | 4  | ,411 |
| sv5(1)               | 3,644 | 1  | ,056 |
| sv5(2)               | ,376  | 1  | ,540 |
| sv5(3)               | ,265  | 1  | ,607 |
| sv5(4)               | ,067  | 1  | ,796 |
| Overall Statistics   | 3,960 | 4  | ,411 |

### Block 1: Method = Enter

Omnibus Tests of Model Coefficients

|             | Chi-square | df | Sig. |
|-------------|------------|----|------|
| Step 1 Step | 4,091      | 4  | ,394 |
| Block       | 4,091      | 4  | ,394 |
| Model       | 4,091      | 4  | ,394 |

## Model Summary

| Step | -2 Log likelihood     | Cox & Snell R Square | Nagelkerke R Square |
|------|-----------------------|----------------------|---------------------|
| 1    | 2414,692 <sup>a</sup> | ,000                 | ,002                |

a. Estimation terminated at iteration number 7 because parameter estimates changed by less than ,001.

Classification Table<sup>a</sup>

| Observed           |                               |                           | Predicted                 |                      |
|--------------------|-------------------------------|---------------------------|---------------------------|----------------------|
|                    |                               |                           | 0 ingen eller en händelse | 1 mer än en händelse |
| Step 1             | handt1 händelse larger than 1 | 0 ingen eller en händelse | 12229                     | 0                    |
|                    |                               | 1 mer än en händelse      | 246                       | 0                    |
| Overall Percentage |                               |                           |                           |                      |

Classification Table<sup>a</sup>

| Observed           |                               |                           | Predicted          |
|--------------------|-------------------------------|---------------------------|--------------------|
|                    |                               |                           | Percentage Correct |
| Step 1             | handt1 händelse larger than 1 | 0 ingen eller en händelse | 100,0              |
|                    |                               | 1 mer än en händelse      | ,0                 |
| Overall Percentage |                               |                           | 98,0               |

a. The cut value is ,500

## Variables in the Equation

|                     |        | B      | S.E. | Wald    | df | Sig. | Exp(B) | 95% C.I.. |
|---------------------|--------|--------|------|---------|----|------|--------|-----------|
|                     |        | Lower  |      |         |    |      |        |           |
| Step 1 <sup>a</sup> | sv5    |        |      | 3,932   | 4  | ,415 |        |           |
|                     | sv5(1) | -,352  | ,205 | 2,932   | 1  | ,087 | ,703   | ,470      |
|                     | sv5(2) | -,044  | ,226 | ,037    | 1  | ,847 | ,957   | ,614      |
|                     | sv5(3) | -,070  | ,213 | ,108    | 1  | ,743 | ,933   | ,615      |
|                     | sv5(4) | -,107  | ,203 | ,278    | 1  | ,598 | ,898   | ,603      |
| Constant            |        | -3,769 | ,156 | 583,321 | 1  | ,000 | ,023   |           |

## Variables in the Equation

|                     |        | 95% C.I.... |
|---------------------|--------|-------------|
|                     |        | Upper       |
| Step 1 <sup>a</sup> | sv5    |             |
|                     | sv5(1) | 1,052       |
|                     | sv5(2) | 1,492       |
|                     | sv5(3) | 1,415       |
|                     | sv5(4) | 1,338       |
| Constant            |        |             |

a. Variable(s) entered on step 1: sv5.

```
LOGISTIC REGRESSION VARIABLES handlt1
/METHOD=ENTER sv7
/CONTRAST (sv7)=Indicator(1)
/PRINT=CI(95)
/CRITERIA=PIN(0.05) POUT(0.10) ITERATE(20) CUT(0.5).
```

## Logistic Regression

[DataSet6] C:\cWordjan\Rafaela\_VCS\alla\_tillsammans\abo\_bjo\_vasa\_v1.sav

### Case Processing Summary

| Unweighted Cases <sup>a</sup> |                      | N     | Percent |
|-------------------------------|----------------------|-------|---------|
| Selected Cases                | Included in Analysis | 12475 | 100,0   |
|                               | Missing Cases        | 0     | ,0      |
|                               | Total                | 12475 | 100,0   |
| Unselected Cases              |                      | 0     | ,0      |
| Total                         |                      | 12475 | 100,0   |

a. If weight is in effect, see classification table for the total number of cases.

### Dependent Variable Encoding

| Original Value            | Internal Value |
|---------------------------|----------------|
| 0 ingen eller en händelse | 0              |
| 1 mer än en händelse      | 1              |

### Categorical Variables Codings

|                              |                      | Frequency | Parameter coding |       |       |
|------------------------------|----------------------|-----------|------------------|-------|-------|
|                              |                      |           | (1)              | (2)   | (3)   |
| sv7 sjättedelar för standard | 1 fjärde sjundedelen | 1423      | ,000             | ,000  | ,000  |
|                              | 2 första sjundedelen | 3031      | 1,000            | ,000  | ,000  |
|                              | 3 andra sjundedelen  | 1238      | ,000             | 1,000 | ,000  |
|                              | 4 tredje sjundedelen | 1255      | ,000             | ,000  | 1,000 |
|                              | 5 femte sjundedelen  | 1445      | ,000             | ,000  | ,000  |
|                              | 6 sjätte sjundedelen | 1948      | ,000             | ,000  | ,000  |
|                              | 7 sjunde sjundedelen | 2135      | ,000             | ,000  | ,000  |

## Categorical Variables Codings

|                              |                      | Parameter coding |       |       |
|------------------------------|----------------------|------------------|-------|-------|
|                              |                      | (4)              | (5)   | (6)   |
| sv7 sjättedelar för standard | 1 fjärde sjundedelen | ,000             | ,000  | ,000  |
|                              | 2 första sjundedelen | ,000             | ,000  | ,000  |
|                              | 3 andra sjundedelen  | ,000             | ,000  | ,000  |
|                              | 4 tredje sjundedelen | ,000             | ,000  | ,000  |
|                              | 5 femte sjundedelen  | 1,000            | ,000  | ,000  |
|                              | 6 sjätte sjundedelen | ,000             | 1,000 | ,000  |
|                              | 7 sjunde sjundedelen | ,000             | ,000  | 1,000 |

## Block 0: Beginning Block

Classification Table<sup>a,b</sup>

| Observed           |                                |                           | Predicted                      |                      |
|--------------------|--------------------------------|---------------------------|--------------------------------|----------------------|
|                    |                                |                           | handlt1 händelse larger than 1 |                      |
|                    |                                |                           | 0 ingen eller en händelse      | 1 mer än en händelse |
| Step 0             | handlt1 händelse larger than 1 | 0 ingen eller en händelse | 12229                          | 0                    |
|                    |                                | 1 mer än en händelse      | 246                            | 0                    |
| Overall Percentage |                                |                           |                                |                      |

Classification Table<sup>a,b</sup>

| Observed           |                                |                           | Predicted          |
|--------------------|--------------------------------|---------------------------|--------------------|
|                    |                                |                           | Percentage Correct |
| Step 0             | handlt1 händelse larger than 1 | 0 ingen eller en händelse | 100,0              |
|                    |                                | 1 mer än en händelse      | ,0                 |
| Overall Percentage |                                |                           | 98,0               |

a. Constant is included in the model.

b. The cut value is ,500

## Variables in the Equation

|        |          | B      | S.E. | Wald     | df | Sig. | Exp(B) |
|--------|----------|--------|------|----------|----|------|--------|
| Step 0 | Constant | -3,906 | ,064 | 3679,612 | 1  | ,000 | ,020   |

**Variables not in the Equation**

|        |                    |        | Score | df | Sig. |
|--------|--------------------|--------|-------|----|------|
| Step 0 | Variables          | sv7    | 5,330 | 6  | ,502 |
|        |                    | sv7(1) | 4,275 | 1  | ,039 |
|        |                    | sv7(2) | ,008  | 1  | ,929 |
|        |                    | sv7(3) | ,232  | 1  | ,630 |
|        |                    | sv7(4) | ,010  | 1  | ,921 |
|        |                    | sv7(5) | 1,811 | 1  | ,178 |
|        |                    | sv7(6) | ,246  | 1  | ,620 |
|        | Overall Statistics |        | 5,330 | 6  | ,502 |

**Block 1: Method = Enter**

**Omnibus Tests of Model Coefficients**

|        |       | Chi-square | df | Sig. |
|--------|-------|------------|----|------|
| Step 1 | Step  | 5,503      | 6  | ,481 |
|        | Block | 5,503      | 6  | ,481 |
|        | Model | 5,503      | 6  | ,481 |

**Model Summary**

| Step | -2 Log likelihood     | Cox & Snell R Square | Nagelkerke R Square |
|------|-----------------------|----------------------|---------------------|
| 1    | 2413,280 <sup>a</sup> | ,000                 | ,003                |

a. Estimation terminated at iteration number 7 because parameter estimates changed by less than ,001.

**Classification Table<sup>a</sup>**

|                    |                               |                           | Predicted                     |                      |
|--------------------|-------------------------------|---------------------------|-------------------------------|----------------------|
|                    |                               |                           | handt1 händelse larger than 1 |                      |
| Observed           |                               |                           | 0 ingen eller en händelse     | 1 mer än en händelse |
| Step 1             | handt1 händelse larger than 1 | 0 ingen eller en händelse | 12229                         | 0                    |
|                    |                               | 1 mer än en händelse      | 246                           | 0                    |
| Overall Percentage |                               |                           |                               |                      |

**Classification Table<sup>a</sup>**

|                    |                               |                           | Predicted          |
|--------------------|-------------------------------|---------------------------|--------------------|
| Observed           |                               |                           | Percentage Correct |
| Step 1             | handt1 händelse larger than 1 | 0 ingen eller en händelse | 100,0              |
|                    |                               | 1 mer än en händelse      | ,0                 |
| Overall Percentage |                               |                           | 98,0               |

a. The cut value is ,500

Variables in the Equation

|                     |          | B      | S.E. | Wald    | df | Sig. | Exp(B) | 95% C.I.. |
|---------------------|----------|--------|------|---------|----|------|--------|-----------|
|                     |          |        |      |         |    |      |        | Lower     |
| Step 1 <sup>a</sup> | sv7      |        |      | 5,277   | 6  | ,509 |        |           |
|                     | sv7(1)   | -,335  | ,237 | 1,996   | 1  | ,158 | ,716   | ,450      |
|                     | sv7(2)   | -,086  | ,277 | ,096    | 1  | ,757 | ,918   | ,534      |
|                     | sv7(3)   | ,021   | ,268 | ,006    | 1  | ,938 | 1,021  | ,604      |
|                     | sv7(4)   | -,086  | ,265 | ,105    | 1  | ,746 | ,918   | ,545      |
|                     | sv7(5)   | ,116   | ,237 | ,239    | 1  | ,625 | 1,123  | ,705      |
|                     | sv7(6)   | ,000   | ,238 | ,000    | 1  | ,999 | 1,000  | ,627      |
|                     | Constant | -3,838 | ,185 | 432,595 | 1  | ,000 | ,022   |           |

Variables in the Equation

|                     |          | 95% C.I.... |
|---------------------|----------|-------------|
|                     |          | Upper       |
| Step 1 <sup>a</sup> | sv7      |             |
|                     | sv7(1)   | 1,138       |
|                     | sv7(2)   | 1,579       |
|                     | sv7(3)   | 1,727       |
|                     | sv7(4)   | 1,544       |
|                     | sv7(5)   | 1,788       |
|                     | sv7(6)   | 1,595       |
|                     | Constant |             |

a. Variable(s) entered on step 1: sv7.

\*\*

LOGISTIC REGRESSION VARIABLES dod01

/METHOD=ENTER bv1

/CONTRAST (bv1)=Indicator(1)

/PRINT=CI(95)

/CRITERIA=PIN(0.05) POUT(0.10) ITERATE(20) CUT(0.5).

## Logistic Regression

[DataSet6] C:\cWordjan\Rafaela\_VCS\alla\_tillsammans\abo\_bjo\_vasa\_v1.sav

**Case Processing Summary**

| Unweighted Cases <sup>a</sup> |                      | N     | Percent |
|-------------------------------|----------------------|-------|---------|
| Selected Cases                | Included in Analysis | 12475 | 100,0   |
|                               | Missing Cases        | 0     | ,0      |
|                               | Total                | 12475 | 100,0   |
| Unselected Cases              |                      | 0     | ,0      |
| Total                         |                      | 12475 | 100,0   |

a. If weight is in effect, see classification table for the total number of cases.

**Dependent Variable Encoding**

| Original Value       | Internal Value |
|----------------------|----------------|
| 0 inget dödsfall     | 0              |
| 1 minst ett dödsfall | 1              |

**Categorical Variables Codings**

|                           |                   | Frequency | Parameter coding |       |
|---------------------------|-------------------|-----------|------------------|-------|
|                           |                   |           | (1)              | (2)   |
| bv1 belastning vs paoncil | 1 medelbelastning | 5380      | ,000             | ,000  |
|                           | 2 underbelastning | 3222      | 1,000            | ,000  |
|                           | 3 överbelastning  | 3873      | ,000             | 1,000 |

**Block 0: Beginning Block****Classification Table<sup>a,b</sup>**

|                    |                             |                      | Predicted                   |                      |
|--------------------|-----------------------------|----------------------|-----------------------------|----------------------|
|                    |                             |                      | dod01 dödsfall ja eller nej |                      |
|                    |                             |                      | 0 inget dödsfall            | 1 minst ett dödsfall |
| Observed           |                             |                      |                             |                      |
| Step 0             | dod01 dödsfall ja eller nej | 0 inget dödsfall     | 11839                       | 0                    |
|                    |                             | 1 minst ett dödsfall | 636                         | 0                    |
| Overall Percentage |                             |                      |                             |                      |

**Classification Table<sup>a,b</sup>**

|                    |                             |                      | Predicted          |
|--------------------|-----------------------------|----------------------|--------------------|
|                    |                             |                      | Percentage Correct |
| Observed           |                             |                      |                    |
| Step 0             | dod01 dödsfall ja eller nej | 0 inget dödsfall     | 100,0              |
|                    |                             | 1 minst ett dödsfall | ,0                 |
| Overall Percentage |                             |                      | 94,9               |

a. Constant is included in the model.

b. The cut value is ,500

## Variables in the Equation

|                 | B      | S.E. | Wald     | df | Sig. | Exp(B) |
|-----------------|--------|------|----------|----|------|--------|
| Step 0 Constant | -2,924 | ,041 | 5160,279 | 1  | ,000 | ,054   |

## Variables not in the Equation

|                    | Score  | df | Sig. |
|--------------------|--------|----|------|
| Step 0 Variables   |        |    |      |
| bv1                | 63,175 | 2  | ,000 |
| bv1(1)             | 45,163 | 1  | ,000 |
| bv1(2)             | 43,009 | 1  | ,000 |
| Overall Statistics | 63,175 | 2  | ,000 |

## Block 1: Method = Enter

## Omnibus Tests of Model Coefficients

|             | Chi-square | df | Sig. |
|-------------|------------|----|------|
| Step 1 Step | 66,252     | 2  | ,000 |
| Block       | 66,252     | 2  | ,000 |
| Model       | 66,252     | 2  | ,000 |

## Model Summary

| Step | -2 Log likelihood     | Cox & Snell R Square | Nagelkerke R Square |
|------|-----------------------|----------------------|---------------------|
| 1    | 4958,590 <sup>a</sup> | ,005                 | ,016                |

a. Estimation terminated at iteration number 6 because parameter estimates changed by less than ,001.

Classification Table<sup>a</sup>

| Observed           |                             | Predicted                   |                      |   |
|--------------------|-----------------------------|-----------------------------|----------------------|---|
|                    |                             | dod01 dödsfall ja eller nej |                      |   |
|                    |                             | 0 inget dödsfall            | 1 minst ett dödsfall |   |
| Step 1             | dod01 dödsfall ja eller nej | 0 inget dödsfall            | 11839                | 0 |
|                    |                             | 1 minst ett dödsfall        | 636                  | 0 |
| Overall Percentage |                             |                             |                      |   |

Classification Table<sup>a</sup>

| Observed           |                             | Predicted            |       |
|--------------------|-----------------------------|----------------------|-------|
|                    |                             | Percentage Correct   |       |
| Step 1             | dod01 dödsfall ja eller nej | 0 inget dödsfall     | 100,0 |
|                    |                             | 1 minst ett dödsfall | ,0    |
| Overall Percentage |                             |                      | 94,9  |

a. The cut value is ,500



## Variables in the Equation

|                         | B      | S.E. | Wald     | df | Sig. | Exp(B) | 95% C.I.. |
|-------------------------|--------|------|----------|----|------|--------|-----------|
|                         |        |      |          |    |      |        | Lower     |
| Step 1 <sup>a</sup> bv1 |        |      | 60,393   | 2  | ,000 |        |           |
| bv1(1)                  | -,594  | ,123 | 23,445   | 1  | ,000 | ,552   | ,434      |
| bv1(2)                  | ,350   | ,088 | 15,616   | 1  | ,000 | 1,418  | 1,193     |
| Constant                | -2,933 | ,062 | 2221,217 | 1  | ,000 | ,053   |           |

## Variables in the Equation

|                         | 95% C.I.... |
|-------------------------|-------------|
|                         | Upper       |
| Step 1 <sup>a</sup> bv1 |             |
| bv1(1)                  | ,702        |
| bv1(2)                  | 1,687       |
| Constant                |             |

a. Variable(s) entered on step 1: bv1.

```
LOGISTIC REGRESSION VARIABLES dod01
  /METHOD=ENTER bv2
  /CONTRAST (bv2)=Indicator(1)
  /PRINT=CI(95)
  /CRITERIA=PIN(0.05) POUT(0.10) ITERATE(20) CUT(0.5).
```

## Logistic Regression

[DataSet6] C:\cWordjan\Rafaela\_VCS\alla\_tillsammans\abo\_bjo\_vasa\_v1.sav

### Case Processing Summary

| Unweighted Cases <sup>a</sup> |                      | N     | Percent |
|-------------------------------|----------------------|-------|---------|
| Selected Cases                | Included in Analysis | 12475 | 100,0   |
|                               | Missing Cases        | 0     | ,0      |
|                               | Total                | 12475 | 100,0   |
| Unselected Cases              |                      | 0     | ,0      |
| Total                         |                      | 12475 | 100,0   |

a. If weight is in effect, see classification table for the total number of cases.

### Dependent Variable Encoding

| Original Value       | Internal Value |
|----------------------|----------------|
| 0 inget dödsfall     | 0              |
| 1 minst ett dödsfall | 1              |

## Categorical Variables Codings

|                                             |                   | Frequency | Parameter coding |       |
|---------------------------------------------|-------------------|-----------|------------------|-------|
|                                             |                   |           | (1)              | (2)   |
| bv2 belastning vs paencil halva intervallet | 1 medelbelastning | 2788      | ,000             | ,000  |
|                                             | 2 underbelastning | 4419      | 1,000            | ,000  |
|                                             | 3 överbelastning  | 5268      | ,000             | 1,000 |

## Block 0: Beginning Block

Classification Table<sup>a,b</sup>

| Observed           |                             |                      | Predicted                   |                      |
|--------------------|-----------------------------|----------------------|-----------------------------|----------------------|
|                    |                             |                      | dod01 dödsfall ja eller nej |                      |
|                    |                             |                      | 0 inget dödsfall            | 1 minst ett dödsfall |
| Step 0             | dod01 dödsfall ja eller nej | 0 inget dödsfall     | 11839                       | 0                    |
|                    |                             | 1 minst ett dödsfall | 636                         | 0                    |
| Overall Percentage |                             |                      |                             |                      |

Classification Table<sup>a,b</sup>

| Observed           |                             |                      | Predicted          |
|--------------------|-----------------------------|----------------------|--------------------|
|                    |                             |                      | Percentage Correct |
| Step 0             | dod01 dödsfall ja eller nej | 0 inget dödsfall     | 100,0              |
|                    |                             | 1 minst ett dödsfall | ,0                 |
| Overall Percentage |                             |                      | 94,9               |

a. Constant is included in the model.

b. The cut value is ,500

## Variables in the Equation

|                 | B      | S.E. | Wald     | df | Sig. | Exp(B) |
|-----------------|--------|------|----------|----|------|--------|
| Step 0 Constant | -2,924 | ,041 | 5160,279 | 1  | ,000 | ,054   |

## Variables not in the Equation

|                    | Score  | df | Sig. |
|--------------------|--------|----|------|
| Step 0 Variables   |        |    |      |
| bv2                | 54,080 | 2  | ,000 |
| bv2(1)             | 43,266 | 1  | ,000 |
| bv2(2)             | 45,028 | 1  | ,000 |
| Overall Statistics | 54,080 | 2  | ,000 |

## Block 1: Method = Enter

## Omnibus Tests of Model Coefficients

|        |       | Chi-square | df | Sig. |
|--------|-------|------------|----|------|
| Step 1 | Step  | 55,598     | 2  | ,000 |
|        | Block | 55,598     | 2  | ,000 |
|        | Model | 55,598     | 2  | ,000 |

## Model Summary

| Step | -2 Log likelihood     | Cox & Snell R Square | Nagelkerke R Square |
|------|-----------------------|----------------------|---------------------|
| 1    | 4969,244 <sup>a</sup> | ,004                 | ,013                |

a. Estimation terminated at iteration number 6 because parameter estimates changed by less than ,001.

Classification Table<sup>a</sup>

| Observed           |                             | Predicted                   |                      |   |
|--------------------|-----------------------------|-----------------------------|----------------------|---|
|                    |                             | dod01 dödsfall ja eller nej |                      |   |
|                    |                             | 0 inget dödsfall            | 1 minst ett dödsfall |   |
| Step 1             | dod01 dödsfall ja eller nej | 0 inget dödsfall            | 11839                | 0 |
|                    |                             | 1 minst ett dödsfall        | 636                  | 0 |
| Overall Percentage |                             |                             |                      |   |

Classification Table<sup>a</sup>

| Observed           |                             | Predicted          |
|--------------------|-----------------------------|--------------------|
|                    |                             | Percentage Correct |
| Step 1             | dod01 dödsfall ja eller nej | 100,0              |
|                    |                             | ,0                 |
| Overall Percentage |                             | 94,9               |

a. The cut value is ,500

## Variables in the Equation

|                     |          | B      | S.E. | Wald     | df | Sig. | Exp(B) | 95% C.I.. |
|---------------------|----------|--------|------|----------|----|------|--------|-----------|
|                     |          |        |      |          |    |      |        | Lower     |
| Step 1 <sup>a</sup> | bv2      |        |      | 52,418   | 2  | ,000 |        |           |
|                     | bv2(1)   | -,407  | ,121 | 11,353   | 1  | ,001 | ,665   | ,525      |
|                     | bv2(2)   | ,312   | ,103 | 9,131    | 1  | ,003 | 1,367  | 1,116     |
|                     | Constant | -2,955 | ,087 | 1145,421 | 1  | ,000 | ,052   |           |

## Variables in the Equation

|                     |          | 95% C.I.... |
|---------------------|----------|-------------|
|                     |          | Upper       |
| Step 1 <sup>a</sup> | bv2      |             |
|                     | bv2(1)   | ,843        |
|                     | bv2(2)   | 1,674       |
|                     | Constant |             |

a. Variable(s) entered on step 1: bv2.

LOGISTIC REGRESSION VARIABLES dod01

/METHOD=ENTER bv3

/CONTRAST (bv3)=Indicator(1)

/PRINT=CI(95)

/CRITERIA=PIN(0.05) POUT(0.10) ITERATE(20) CUT(0.5).

## Logistic Regression

[DataSet6] C:\cWordjan\Rafaela\_VCS\alla\_tillsammans\abo\_bjo\_vasa\_v1.sav

## Case Processing Summary

| Unweighted Cases <sup>a</sup> |                      | N     | Percent |
|-------------------------------|----------------------|-------|---------|
| Selected Cases                | Included in Analysis | 12475 | 100,0   |
|                               | Missing Cases        | 0     | ,0      |
|                               | Total                | 12475 | 100,0   |
| Unselected Cases              |                      | 0     | ,0      |
| Total                         |                      | 12475 | 100,0   |

a. If weight is in effect, see classification table for the total number of cases.

## Dependent Variable Encoding

| Original Value       | Internal Value |
|----------------------|----------------|
| 0 inget dödsfall     | 0              |
| 1 minst ett dödsfall | 1              |

## Categorical Variables Codings

|                                              |                   | Frequency | Parameter coding |       |
|----------------------------------------------|-------------------|-----------|------------------|-------|
|                                              |                   |           | (1)              | (2)   |
| bv3 belasnting vs paencil dubbla intervallet | 1 medelbelastning | 9121      | ,000             | ,000  |
|                                              | 2 underbelastning | 1505      | 1,000            | ,000  |
|                                              | 3 överbelastning  | 1849      | ,000             | 1,000 |

## Block 0: Beginning Block

Classification Table<sup>a,b</sup>

| Observed           |                             | Predicted                   |                      |
|--------------------|-----------------------------|-----------------------------|----------------------|
|                    |                             | dod01 dödsfall ja eller nej |                      |
|                    |                             | 0 inget dödsfall            | 1 minst ett dödsfall |
| Step 0             | dod01 dödsfall ja eller nej | 0 inget dödsfall            | 11839                |
|                    |                             | 1 minst ett dödsfall        | 636                  |
| Overall Percentage |                             |                             |                      |

Classification Table<sup>a,b</sup>

| Observed           |                             | Predicted            |       |
|--------------------|-----------------------------|----------------------|-------|
|                    |                             | Percentage Correct   |       |
| Step 0             | dod01 dödsfall ja eller nej | 0 inget dödsfall     | 100,0 |
|                    |                             | 1 minst ett dödsfall | ,0    |
| Overall Percentage |                             |                      | 94,9  |

a. Constant is included in the model.

b. The cut value is ,500

Variables in the Equation

|                 | B      | S.E. | Wald     | df | Sig. | Exp(B) |
|-----------------|--------|------|----------|----|------|--------|
| Step 0 Constant | -2,924 | ,041 | 5160,279 | 1  | ,000 | ,054   |

Variables not in the Equation

|                    | Score  | df | Sig. |
|--------------------|--------|----|------|
| Step 0 Variables   |        |    |      |
| bv3                | 50,436 | 2  | ,000 |
| bv3(1)             | 34,100 | 1  | ,000 |
| bv3(2)             | 23,966 | 1  | ,000 |
| Overall Statistics | 50,436 | 2  | ,000 |

## Block 1: Method = Enter

Omnibus Tests of Model Coefficients

|             | Chi-square | df | Sig. |
|-------------|------------|----|------|
| Step 1 Step | 56,679     | 2  | ,000 |
| Block       | 56,679     | 2  | ,000 |
| Model       | 56,679     | 2  | ,000 |

Model Summary

| Step | -2 Log likelihood     | Cox & Snell R Square | Nagelkerke R Square |
|------|-----------------------|----------------------|---------------------|
| 1    | 4968,163 <sup>a</sup> | ,005                 | ,014                |

a. Estimation terminated at iteration number 7 because parameter estimates changed by less than ,001.

Classification Table<sup>a</sup>

| Observed           |                             |                      | Predicted                   |                      |
|--------------------|-----------------------------|----------------------|-----------------------------|----------------------|
|                    |                             |                      | dod01 dödsfall ja eller nej |                      |
|                    |                             |                      | 0 inget dödsfall            | 1 minst ett dödsfall |
| Step 1             | dod01 dödsfall ja eller nej | 0 inget dödsfall     | 11839                       | 0                    |
|                    |                             | 1 minst ett dödsfall | 636                         | 0                    |
| Overall Percentage |                             |                      |                             |                      |

Classification Table<sup>a</sup>

| Observed           |                             |                      | Predicted          |
|--------------------|-----------------------------|----------------------|--------------------|
|                    |                             |                      | Percentage Correct |
| Step 1             | dod01 dödsfall ja eller nej | 0 inget dödsfall     | 100,0              |
|                    |                             | 1 minst ett dödsfall | ,0                 |
| Overall Percentage |                             |                      | 94,9               |

a. The cut value is ,500

Variables in the Equation

|                         | B      | S.E. | Wald     | df | Sig. | Exp(B) | 95% C.I.. |
|-------------------------|--------|------|----------|----|------|--------|-----------|
|                         |        |      |          |    |      |        | Lower     |
| Step 1 <sup>a</sup> bv3 |        |      | 46,793   | 2  | ,000 |        |           |
|                         | -,980  | ,190 | 26,502   | 1  | ,000 | ,375   | ,258      |
|                         | ,390   | ,101 | 14,975   | 1  | ,000 | 1,476  | 1,212     |
| Constant                | -2,915 | ,047 | 3780,133 | 1  | ,000 | ,054   |           |

Variables in the Equation

|                         |          | 95% C.I.... |
|-------------------------|----------|-------------|
|                         |          | Upper       |
| Step 1 <sup>a</sup> bv3 |          |             |
|                         | bv3(1)   | ,545        |
|                         | bv3(2)   | 1,798       |
|                         | Constant |             |

a. Variable(s) entered on step 1: bv3.

LOGISTIC REGRESSION VARIABLES dod01

/METHOD=ENTER sv3

/CONTRAST (sv3)=Indicator(1)

/PRINT=CI(95)

/CRITERIA=PIN(0.05) POUT(0.10) ITERATE(20) CUT(0.5).

## Logistic Regression

[DataSet6] C:\cWordjan\Rafaela\_VCS\alla\_tillsammans\abo\_bjo\_vasa\_v1.sav

### Case Processing Summary

| Unweighted Cases <sup>a</sup> |                      | N     | Percent |
|-------------------------------|----------------------|-------|---------|
| Selected Cases                | Included in Analysis | 12475 | 100,0   |
|                               | Missing Cases        | 0     | ,0      |
|                               | Total                | 12475 | 100,0   |
| Unselected Cases              |                      | 0     | ,0      |
| Total                         |                      | 12475 | 100,0   |

a. If weight is in effect, see classification table for the total number of cases.

### Dependent Variable Encoding

| Original Value       | Internal Value |
|----------------------|----------------|
| 0 inget dödsfall     | 0              |
| 1 minst ett dödsfall | 1              |

### Categorical Variables Codings

|                              |                      | Frequency | Parameter coding |       |
|------------------------------|----------------------|-----------|------------------|-------|
|                              |                      |           | (1)              | (2)   |
| sv3 tredjedelar för standard | 1 andra tredjedelen  | 3172      | ,000             | ,000  |
|                              | 2 första tredjedelen | 4718      | 1,000            | ,000  |
|                              | 3 tredje tredjedelen | 4585      | ,000             | 1,000 |

## Block 0: Beginning Block

Classification Table<sup>a,b</sup>

| Observed           |                             | Predicted                   |                      |   |
|--------------------|-----------------------------|-----------------------------|----------------------|---|
|                    |                             | dod01 dödsfall ja eller nej |                      |   |
|                    |                             | 0 inget dödsfall            | 1 minst ett dödsfall |   |
| Step 0             | dod01 dödsfall ja eller nej | 0 inget dödsfall            | 11839                | 0 |
|                    |                             | 1 minst ett dödsfall        | 636                  | 0 |
| Overall Percentage |                             |                             |                      |   |

Classification Table<sup>a,b</sup>

| Observed           |                             | Predicted            |       |
|--------------------|-----------------------------|----------------------|-------|
|                    |                             | Percentage Correct   |       |
| Step 0             | dod01 dödsfall ja eller nej | 0 inget dödsfall     | 100,0 |
|                    |                             | 1 minst ett dödsfall | ,0    |
| Overall Percentage |                             |                      | 94,9  |

a. Constant is included in the model.

b. The cut value is ,500

## Variables in the Equation

|                 | B      | S.E. | Wald     | df | Sig. | Exp(B) |
|-----------------|--------|------|----------|----|------|--------|
| Step 0 Constant | -2,924 | ,041 | 5160,279 | 1  | ,000 | ,054   |

## Variables not in the Equation

|                      | Score  | df | Sig. |
|----------------------|--------|----|------|
| Step 0 Variables sv3 | 61,737 | 2  | ,000 |
| sv3(1)               | 61,635 | 1  | ,000 |
| sv3(2)               | 19,457 | 1  | ,000 |
| Overall Statistics   | 61,737 | 2  | ,000 |

## Block 1: Method = Enter

## Omnibus Tests of Model Coefficients

|             | Chi-square | df | Sig. |
|-------------|------------|----|------|
| Step 1 Step | 66,069     | 2  | ,000 |
| Block       | 66,069     | 2  | ,000 |
| Model       | 66,069     | 2  | ,000 |

## Model Summary

| Step | -2 Log likelihood     | Cox & Snell R Square | Nagelkerke R Square |
|------|-----------------------|----------------------|---------------------|
| 1    | 4958,774 <sup>a</sup> | ,005                 | ,016                |

a. Estimation terminated at iteration number 6 because parameter estimates changed by less than ,001.

Classification Table<sup>a</sup>

| Observed           |                             | Predicted                   |                      |   |
|--------------------|-----------------------------|-----------------------------|----------------------|---|
|                    |                             | dod01 dödsfall ja eller nej |                      |   |
|                    |                             | 0 inget dödsfall            | 1 minst ett dödsfall |   |
| Step 1             | dod01 dödsfall ja eller nej | 0 inget dödsfall            | 11839                | 0 |
|                    |                             | 1 minst ett dödsfall        | 636                  | 0 |
| Overall Percentage |                             |                             |                      |   |

Classification Table<sup>a</sup>

| Observed           |                             | Predicted            |       |
|--------------------|-----------------------------|----------------------|-------|
|                    |                             | Percentage Correct   |       |
| Step 1             | dod01 dödsfall ja eller nej | 0 inget dödsfall     | 100,0 |
|                    |                             | 1 minst ett dödsfall | ,0    |
| Overall Percentage |                             |                      | 94,9  |

a. The cut value is ,500



**Variables in the Equation**

|                         | B      | S.E. | Wald     | df | Sig. | Exp(B) | 95% C.I.. |      |
|-------------------------|--------|------|----------|----|------|--------|-----------|------|
|                         |        |      |          |    |      |        | Lower     |      |
| Step 1 <sup>a</sup> sv3 |        |      | 59,299   | 2  | ,000 |        |           |      |
| sv3(1)                  | -,754  | ,111 | 46,314   | 1  | ,000 | ,470   |           | ,379 |
| sv3(2)                  | -,027  | ,095 | ,083     | 1  | ,773 | ,973   |           | ,808 |
| Constant                | -2,683 | ,073 | 1367,544 | 1  | ,000 | ,068   |           |      |

**Variables in the Equation**

|                         | 95% C.I.... |       |
|-------------------------|-------------|-------|
|                         | Upper       |       |
| Step 1 <sup>a</sup> sv3 |             |       |
| sv3(1)                  |             | ,584  |
| sv3(2)                  |             | 1,172 |
| Constant                |             |       |

a. Variable(s) entered on step 1: sv3.

```
LOGISTIC REGRESSION VARIABLES dod01
/METHOD=ENTER sv5
/CONTRAST (sv5)=Indicator(1)
/PRINT=CI(95)
/CRITERIA=PIN(0.05) POUT(0.10) ITERATE(20) CUT(0.5).
```

**Logistic Regression**

[DataSet6] C:\cWordjan\Rafaela\_VCS\alla\_tillsammans\abo\_bjo\_vasa\_v1.sav

**Case Processing Summary**

| Unweighted Cases <sup>a</sup> |                      | N     | Percent |
|-------------------------------|----------------------|-------|---------|
| Selected Cases                | Included in Analysis | 12475 | 100,0   |
|                               | Missing Cases        | 0     | ,0      |
|                               | Total                | 12475 | 100,0   |
| Unselected Cases              |                      | 0     | ,0      |
| Total                         |                      | 12475 | 100,0   |

a. If weight is in effect, see classification table for the total number of cases.

**Dependent Variable Encoding**

| Original Value       | Internal Value |
|----------------------|----------------|
| 0 inget dödsfall     | 0              |
| 1 minst ett dödsfall | 1              |

## Categorical Variables Codings

|                            | Frequency          | Parameter coding |       |       |       |       |
|----------------------------|--------------------|------------------|-------|-------|-------|-------|
|                            |                    | (1)              | (2)   | (3)   | (4)   |       |
| sv5 kvintiler för standard | 1 tredje kvintilen | 1863             | ,000  | ,000  | ,000  | ,000  |
|                            | 2 första kvintilen | 3570             | 1,000 | ,000  | ,000  | ,000  |
|                            | 3 andra kvintilen  | 1759             | ,000  | 1,000 | ,000  | ,000  |
|                            | 4 fjärde kvintilen | 2327             | ,000  | ,000  | 1,000 | ,000  |
|                            | 5 femte kvintilen  | 2956             | ,000  | ,000  | ,000  | 1,000 |

## Block 0: Beginning Block

Classification Table<sup>a,b</sup>

| Observed           |                             | Predicted        |                      |
|--------------------|-----------------------------|------------------|----------------------|
|                    |                             | 0 inget dödsfall | 1 minst ett dödsfall |
| Step 0             | dod01 dödsfall ja eller nej | 0 inget dödsfall | 1 minst ett dödsfall |
|                    |                             | 11839            | 0                    |
|                    |                             | 636              | 0                    |
| Overall Percentage |                             |                  |                      |

Classification Table<sup>a,b</sup>

| Observed           |  | Percentage Correct |
|--------------------|--|--------------------|
|                    |  | Step 0             |
|                    |  | 100,0              |
|                    |  | ,0                 |
| Overall Percentage |  | 94,9               |

a. Constant is included in the model.

b. The cut value is ,500

## Variables in the Equation

|                 | B      | S.E. | Wald     | df | Sig. | Exp(B) |
|-----------------|--------|------|----------|----|------|--------|
| Step 0 Constant | -2,924 | ,041 | 5160,279 | 1  | ,000 | ,054   |

## Variables not in the Equation

|                      | Score  | df     | Sig. |      |
|----------------------|--------|--------|------|------|
| Step 0 Variables sv5 | 81,660 | 4      | ,000 |      |
|                      | sv5(1) | 74,755 | 1    | ,000 |
|                      | sv5(2) | ,547   | 1    | ,460 |
|                      | sv5(3) | 22,471 | 1    | ,000 |
|                      | sv5(4) | 3,412  | 1    | ,065 |
| Overall Statistics   | 81,660 | 4      | ,000 |      |

## Block 1: Method = Enter

## Omnibus Tests of Model Coefficients

|        |       | Chi-square | df | Sig. |
|--------|-------|------------|----|------|
| Step 1 | Step  | 91,578     | 4  | ,000 |
|        | Block | 91,578     | 4  | ,000 |
|        | Model | 91,578     | 4  | ,000 |

## Model Summary

| Step | -2 Log likelihood     | Cox & Snell R Square | Nagelkerke R Square |
|------|-----------------------|----------------------|---------------------|
| 1    | 4933,264 <sup>a</sup> | ,007                 | ,022                |

a. Estimation terminated at iteration number 6 because parameter estimates changed by less than ,001.

Classification Table<sup>a</sup>

| Observed           |                             | Predicted                   |                      |   |
|--------------------|-----------------------------|-----------------------------|----------------------|---|
|                    |                             | dod01 dödsfall ja eller nej |                      |   |
|                    |                             | 0 inget dödsfall            | 1 minst ett dödsfall |   |
| Step 1             | dod01 dödsfall ja eller nej | 0 inget dödsfall            | 11839                | 0 |
|                    |                             | 1 minst ett dödsfall        | 636                  | 0 |
| Overall Percentage |                             |                             |                      |   |

Classification Table<sup>a</sup>

| Observed           |                             | Predicted            |       |
|--------------------|-----------------------------|----------------------|-------|
|                    |                             | Percentage Correct   |       |
| Step 1             | dod01 dödsfall ja eller nej | 0 inget dödsfall     | 100,0 |
|                    |                             | 1 minst ett dödsfall | ,0    |
| Overall Percentage |                             |                      | 94,9  |

a. The cut value is ,500

## Variables in the Equation

|                     |          | B      | S.E. | Wald    | df | Sig. | Exp(B) | 95% C.I.<br>Lower |
|---------------------|----------|--------|------|---------|----|------|--------|-------------------|
| Step 1 <sup>a</sup> | sv5      |        |      | 75,882  | 4  | ,000 |        |                   |
|                     | sv5(1)   | -1,026 | ,144 | 50,528  | 1  | ,000 | ,359   | ,270              |
|                     | sv5(2)   | -,176  | ,141 | 1,557   | 1  | ,212 | ,838   | ,636              |
|                     | sv5(3)   | ,096   | ,124 | ,602    | 1  | ,438 | 1,101  | ,863              |
|                     | sv5(4)   | -,121  | ,123 | ,962    | 1  | ,327 | ,886   | ,696              |
|                     | Constant | -2,676 | ,094 | 803,889 | 1  | ,000 | ,069   |                   |

## Variables in the Equation

|                     |          | 95% C.I.... |
|---------------------|----------|-------------|
|                     |          | Upper       |
| Step 1 <sup>a</sup> | sv5      |             |
|                     | sv5(1)   | ,476        |
|                     | sv5(2)   | 1,106       |
|                     | sv5(3)   | 1,405       |
|                     | sv5(4)   | 1,128       |
|                     | Constant |             |

a. Variable(s) entered on step 1: sv5.

```
LOGISTIC REGRESSION VARIABLES dod01
  /METHOD=ENTER sv7
  /CONTRAST (sv7)=Indicator(1)
  /PRINT=CI(95)
  /CRITERIA=PIN(0.05) POUT(0.10) ITERATE(20) CUT(0.5).
```

## Logistic Regression

[DataSet6] C:\cWordjan\Rafaela\_VCS\alla\_tillsammans\abo\_bjo\_vasa\_v1.sav

## Case Processing Summary

| Unweighted Cases <sup>a</sup> |                      | N     | Percent |
|-------------------------------|----------------------|-------|---------|
| Selected Cases                | Included in Analysis | 12475 | 100,0   |
|                               | Missing Cases        | 0     | ,0      |
|                               | Total                | 12475 | 100,0   |
| Unselected Cases              |                      | 0     | ,0      |
| Total                         |                      | 12475 | 100,0   |

a. If weight is in effect, see classification table for the total number of cases.

## Dependent Variable Encoding

| Original Value       | Internal Value |
|----------------------|----------------|
| 0 inget dödsfall     | 0              |
| 1 minst ett dödsfall | 1              |

## Categorical Variables Codings

|                              | Frequency            | Parameter coding |       |       |       |
|------------------------------|----------------------|------------------|-------|-------|-------|
|                              |                      | (1)              | (2)   | (3)   |       |
| sv7 sjättedelar för standard | 1 fjärde sjundedelen | 1423             | ,000  | ,000  | ,000  |
|                              | 2 första sjundedelen | 3031             | 1,000 | ,000  | ,000  |
|                              | 3 andra sjundedelen  | 1238             | ,000  | 1,000 | ,000  |
|                              | 4 tredje sjundedelen | 1255             | ,000  | ,000  | 1,000 |
|                              | 5 femte sjundedelen  | 1445             | ,000  | ,000  | ,000  |
|                              | 6 sjätte sjundedelen | 1948             | ,000  | ,000  | ,000  |
|                              | 7 sjunde sjundedelen | 2135             | ,000  | ,000  | ,000  |

## Categorical Variables Codings

|                              |                      | Parameter coding |       |       |
|------------------------------|----------------------|------------------|-------|-------|
|                              |                      | (4)              | (5)   | (6)   |
| sv7 sjättedelar för standard | 1 fjärde sjundedelen | ,000             | ,000  | ,000  |
|                              | 2 första sjundedelen | ,000             | ,000  | ,000  |
|                              | 3 andra sjundedelen  | ,000             | ,000  | ,000  |
|                              | 4 tredje sjundedelen | ,000             | ,000  | ,000  |
|                              | 5 femte sjundedelen  | 1,000            | ,000  | ,000  |
|                              | 6 sjätte sjundedelen | ,000             | 1,000 | ,000  |
|                              | 7 sjunde sjundedelen | ,000             | ,000  | 1,000 |

## Block 0: Beginning Block

Classification Table<sup>a,b</sup>

| Observed           |                             |                      | Predicted                   |                      |
|--------------------|-----------------------------|----------------------|-----------------------------|----------------------|
|                    |                             |                      | dod01 dödsfall ja eller nej |                      |
|                    |                             |                      | 0 inget dödsfall            | 1 minst ett dödsfall |
| Step 0             | dod01 dödsfall ja eller nej | 0 inget dödsfall     | 11839                       | 0                    |
|                    |                             | 1 minst ett dödsfall | 636                         | 0                    |
| Overall Percentage |                             |                      |                             |                      |

Classification Table<sup>a,b</sup>

| Observed           |                             |                      | Predicted          |
|--------------------|-----------------------------|----------------------|--------------------|
|                    |                             |                      | Percentage Correct |
| Step 0             | dod01 dödsfall ja eller nej | 0 inget dödsfall     | 100,0              |
|                    |                             | 1 minst ett dödsfall | ,0                 |
| Overall Percentage |                             |                      | 94,9               |

a. Constant is included in the model.

b. The cut value is ,500

## Variables in the Equation

|                 | B      | S.E. | Wald     | df | Sig. | Exp(B) |
|-----------------|--------|------|----------|----|------|--------|
| Step 0 Constant | -2,924 | ,041 | 5160,279 | 1  | ,000 | ,054   |

## Variables not in the Equation

|                      | Score   | df | Sig. |
|----------------------|---------|----|------|
| Step 0 Variables sv7 | 110,455 | 6  | ,000 |
| sv7(1)               | 94,684  | 1  | ,000 |
| sv7(2)               | 2,196   | 1  | ,138 |
| sv7(3)               | 1,177   | 1  | ,278 |
| sv7(4)               | 14,883  | 1  | ,000 |
| sv7(5)               | 23,997  | 1  | ,000 |
| sv7(6)               | ,095    | 1  | ,758 |
| Overall Statistics   | 110,455 | 6  | ,000 |

## Block 1: Method = Enter

## Omnibus Tests of Model Coefficients

|             | Chi-square | df | Sig. |
|-------------|------------|----|------|
| Step 1 Step | 130,180    | 6  | ,000 |
| Block       | 130,180    | 6  | ,000 |
| Model       | 130,180    | 6  | ,000 |

## Model Summary

| Step | -2 Log likelihood     | Cox & Snell R Square | Nagelkerke R Square |
|------|-----------------------|----------------------|---------------------|
| 1    | 4894,662 <sup>a</sup> | ,010                 | ,031                |

a. Estimation terminated at iteration number 7 because parameter estimates changed by less than ,001.

Classification Table<sup>a</sup>

|                    |                             | Predicted                   |   |
|--------------------|-----------------------------|-----------------------------|---|
|                    |                             | dod01 dödsfall ja eller nej |   |
| Observed           | 0 inget dödsfall            | 11839                       | 0 |
|                    | 1 minst ett dödsfall        | 636                         | 0 |
| Overall Percentage |                             |                             |   |
| Step 1             | dod01 dödsfall ja eller nej | 0 inget dödsfall            |   |
|                    |                             | 1 minst ett dödsfall        |   |

Classification Table<sup>a</sup>

| Observed           |                             |                      | Predicted          |
|--------------------|-----------------------------|----------------------|--------------------|
|                    |                             |                      | Percentage Correct |
| Step 1             | dod01 dödsfall ja eller nej | 0 inget dödsfall     | 100,0              |
|                    |                             | 1 minst ett dödsfall | ,0                 |
| Overall Percentage |                             |                      | 94,9               |

a. The cut value is ,500

Variables in the Equation

|                     |          | B      | S.E. | Wald    | df | Sig. | Exp(B) | 95% C.I.<br>Lower |
|---------------------|----------|--------|------|---------|----|------|--------|-------------------|
| Step 1 <sup>a</sup> | sv7      |        |      | 96,884  | 6  | ,000 |        |                   |
|                     | sv7(1)   | -1,292 | ,179 | 52,022  | 1  | ,000 | ,275   | ,193              |
|                     | sv7(2)   | ,001   | ,164 | ,000    | 1  | ,996 | 1,001  | ,726              |
|                     | sv7(3)   | -,043  | ,165 | ,067    | 1  | ,795 | ,958   | ,693              |
|                     | sv7(4)   | ,200   | ,151 | 1,740   | 1  | ,187 | 1,221  | ,908              |
|                     | sv7(5)   | ,221   | ,142 | 2,431   | 1  | ,119 | 1,247  | ,945              |
|                     | sv7(6)   | -,196  | ,150 | 1,705   | 1  | ,192 | ,822   | ,613              |
|                     | Constant | -2,756 | ,112 | 607,179 | 1  | ,000 | ,064   |                   |

Variables in the Equation

|                     |          | 95% C.I....<br>Upper |
|---------------------|----------|----------------------|
| Step 1 <sup>a</sup> | sv7      |                      |
|                     | sv7(1)   | ,390                 |
|                     | sv7(2)   | 1,380                |
|                     | sv7(3)   | 1,324                |
|                     | sv7(4)   | 1,642                |
|                     | sv7(5)   | 1,646                |
|                     | sv7(6)   | 1,103                |
|                     | Constant |                      |

a. Variable(s) entered on step 1: sv7.

\*\*

EXECUTE .

COMMENT körs på abo\_bjo\_vasa\_v1.sav

COMMENT med kontroll för VASTY2 (i stället för VASTY, som användes i bara-vasa-varianten)

COMMENT läses i Table 2 som första kolumnen, sex modeller, andra kolumnen, sex modeller, osv

\*\*

LOGISTIC REGRESSION VARIABLES hand01

/METHOD=ENTER bv1 VASTY2

/CONTRAST (bv1)=Indicator(1)

/CONTRAST (VASTY2)=Indicator(1)

/PRINT=CI(95)

/CRITERIA=PIN(0.05) POUT(0.10) ITERATE(20) CUT(0.5).

## Logistic Regression

[DataSet6] C:\cWordjan\Rafaela\_VCS\alla\_tillsammans\abo\_bjo\_vasa\_v1.sav

### Case Processing Summary

| Unweighted Cases <sup>a</sup> |                      | N     | Percent |
|-------------------------------|----------------------|-------|---------|
| Selected Cases                | Included in Analysis | 12475 | 100,0   |
|                               | Missing Cases        | 0     | ,0      |
|                               | Total                | 12475 | 100,0   |
| Unselected Cases              |                      | 0     | ,0      |
| Total                         |                      | 12475 | 100,0   |

a. If weight is in effect, see classification table for the total number of cases.

### Dependent Variable Encoding

| Original Value      | Internal Value |
|---------------------|----------------|
| 0 ingen händelse    | 0              |
| 1 minst en händelse | 1              |



## Categorical Variables Codings

|                           |                   | Frequency | Parameter coding |       |       |
|---------------------------|-------------------|-----------|------------------|-------|-------|
|                           |                   |           | (1)              | (2)   | (3)   |
| VASTY2 (SAIR*10000)+VASTY | 403073101         | 365       | ,000             | ,000  | ,000  |
|                           | 403073102         | 362       | 1,000            | ,000  | ,000  |
|                           | 403073103         | 365       | ,000             | 1,000 | ,000  |
|                           | 403073202         | 365       | ,000             | ,000  | 1,000 |
|                           | 403073203         | 365       | ,000             | ,000  | ,000  |
|                           | 403073204         | 330       | ,000             | ,000  | ,000  |
|                           | 403073303         | 364       | ,000             | ,000  | ,000  |
|                           | 403073651         | 362       | ,000             | ,000  | ,000  |
|                           | 403073771         | 365       | ,000             | ,000  | ,000  |
|                           | 403133102         | 341       | ,000             | ,000  | ,000  |
|                           | 403133106         | 365       | ,000             | ,000  | ,000  |
|                           | 403133107         | 365       | ,000             | ,000  | ,000  |
|                           | 403133109         | 365       | ,000             | ,000  | ,000  |
|                           | 403133202         | 365       | ,000             | ,000  | ,000  |
|                           | 403133203         | 365       | ,000             | ,000  | ,000  |
|                           | 403133204         | 365       | ,000             | ,000  | ,000  |
|                           | 403133315         | 177       | ,000             | ,000  | ,000  |
|                           | 403133322         | 365       | ,000             | ,000  | ,000  |
|                           | 403133401         | 362       | ,000             | ,000  | ,000  |
|                           | 403133402         | 365       | ,000             | ,000  | ,000  |
|                           | 403133550         | 298       | ,000             | ,000  | ,000  |
|                           | 403133772         | 365       | ,000             | ,000  | ,000  |
|                           | 403135803         | 365       | ,000             | ,000  | ,000  |
|                           | 404060001         | 365       | ,000             | ,000  | ,000  |
|                           | 404060002         | 366       | ,000             | ,000  | ,000  |
|                           | 404310003         | 291       | ,000             | ,000  | ,000  |
|                           | 404310004         | 291       | ,000             | ,000  | ,000  |
|                           | 502300005         | 366       | ,000             | ,000  | ,000  |
|                           | 502300006         | 225       | ,000             | ,000  | ,000  |
|                           | 502300007         | 366       | ,000             | ,000  | ,000  |
|                           | 502300214         | 366       | ,000             | ,000  | ,000  |
|                           | 502300411         | 366       | ,000             | ,000  | ,000  |
|                           | 502300415         | 360       | ,000             | ,000  | ,000  |
|                           | 502300416         | 363       | ,000             | ,000  | ,000  |
|                           | 502300811         | 364       | ,000             | ,000  | ,000  |
|                           | 502300913         | 315       | ,000             | ,000  | ,000  |
| bv1 belastning vs paencil | 1 medelbelastning | 5380      | ,000             | ,000  |       |
|                           | 2 underbelastning | 3222      | 1,000            | ,000  |       |
|                           | 3 överbelastning  | 3873      | ,000             | 1,000 |       |

## Categorical Variables Codings

|                           |                   | Parameter coding |       |       |       |
|---------------------------|-------------------|------------------|-------|-------|-------|
|                           |                   | (4)              | (5)   | (6)   | (7)   |
| VASTY2 (SAIR*10000)+VASTY | 403073101         | ,000             | ,000  | ,000  | ,000  |
|                           | 403073102         | ,000             | ,000  | ,000  | ,000  |
|                           | 403073103         | ,000             | ,000  | ,000  | ,000  |
|                           | 403073202         | ,000             | ,000  | ,000  | ,000  |
|                           | 403073203         | 1,000            | ,000  | ,000  | ,000  |
|                           | 403073204         | ,000             | 1,000 | ,000  | ,000  |
|                           | 403073303         | ,000             | ,000  | 1,000 | ,000  |
|                           | 403073651         | ,000             | ,000  | ,000  | 1,000 |
|                           | 403073771         | ,000             | ,000  | ,000  | ,000  |
|                           | 403133102         | ,000             | ,000  | ,000  | ,000  |
|                           | 403133106         | ,000             | ,000  | ,000  | ,000  |
|                           | 403133107         | ,000             | ,000  | ,000  | ,000  |
|                           | 403133109         | ,000             | ,000  | ,000  | ,000  |
|                           | 403133202         | ,000             | ,000  | ,000  | ,000  |
|                           | 403133203         | ,000             | ,000  | ,000  | ,000  |
|                           | 403133204         | ,000             | ,000  | ,000  | ,000  |
|                           | 403133315         | ,000             | ,000  | ,000  | ,000  |
|                           | 403133322         | ,000             | ,000  | ,000  | ,000  |
|                           | 403133401         | ,000             | ,000  | ,000  | ,000  |
|                           | 403133402         | ,000             | ,000  | ,000  | ,000  |
|                           | 403133550         | ,000             | ,000  | ,000  | ,000  |
|                           | 403133772         | ,000             | ,000  | ,000  | ,000  |
|                           | 403135803         | ,000             | ,000  | ,000  | ,000  |
|                           | 404060001         | ,000             | ,000  | ,000  | ,000  |
|                           | 404060002         | ,000             | ,000  | ,000  | ,000  |
|                           | 404310003         | ,000             | ,000  | ,000  | ,000  |
|                           | 404310004         | ,000             | ,000  | ,000  | ,000  |
|                           | 502300005         | ,000             | ,000  | ,000  | ,000  |
|                           | 502300006         | ,000             | ,000  | ,000  | ,000  |
|                           | 502300007         | ,000             | ,000  | ,000  | ,000  |
|                           | 502300214         | ,000             | ,000  | ,000  | ,000  |
|                           | 502300411         | ,000             | ,000  | ,000  | ,000  |
|                           | 502300415         | ,000             | ,000  | ,000  | ,000  |
|                           | 502300416         | ,000             | ,000  | ,000  | ,000  |
|                           | 502300811         | ,000             | ,000  | ,000  | ,000  |
|                           | 502300913         | ,000             | ,000  | ,000  | ,000  |
| bv1 belastning vs paencil | 1 medelbelastning |                  |       |       |       |
|                           | 2 underbelastning |                  |       |       |       |
|                           | 3 överbelastning  |                  |       |       |       |

## Categorical Variables Codings

|                           |                   | Parameter coding |       |       |       |
|---------------------------|-------------------|------------------|-------|-------|-------|
|                           |                   | (8)              | (9)   | (10)  | (11)  |
| VASTY2 (SAIR*10000)+VASTY | 403073101         | ,000             | ,000  | ,000  | ,000  |
|                           | 403073102         | ,000             | ,000  | ,000  | ,000  |
|                           | 403073103         | ,000             | ,000  | ,000  | ,000  |
|                           | 403073202         | ,000             | ,000  | ,000  | ,000  |
|                           | 403073203         | ,000             | ,000  | ,000  | ,000  |
|                           | 403073204         | ,000             | ,000  | ,000  | ,000  |
|                           | 403073303         | ,000             | ,000  | ,000  | ,000  |
|                           | 403073651         | ,000             | ,000  | ,000  | ,000  |
|                           | 403073771         | 1,000            | ,000  | ,000  | ,000  |
|                           | 403133102         | ,000             | 1,000 | ,000  | ,000  |
|                           | 403133106         | ,000             | ,000  | 1,000 | ,000  |
|                           | 403133107         | ,000             | ,000  | ,000  | 1,000 |
|                           | 403133109         | ,000             | ,000  | ,000  | ,000  |
|                           | 403133202         | ,000             | ,000  | ,000  | ,000  |
|                           | 403133203         | ,000             | ,000  | ,000  | ,000  |
|                           | 403133204         | ,000             | ,000  | ,000  | ,000  |
|                           | 403133315         | ,000             | ,000  | ,000  | ,000  |
|                           | 403133322         | ,000             | ,000  | ,000  | ,000  |
|                           | 403133401         | ,000             | ,000  | ,000  | ,000  |
|                           | 403133402         | ,000             | ,000  | ,000  | ,000  |
|                           | 403133550         | ,000             | ,000  | ,000  | ,000  |
|                           | 403133772         | ,000             | ,000  | ,000  | ,000  |
|                           | 403135803         | ,000             | ,000  | ,000  | ,000  |
|                           | 404060001         | ,000             | ,000  | ,000  | ,000  |
|                           | 404060002         | ,000             | ,000  | ,000  | ,000  |
|                           | 404310003         | ,000             | ,000  | ,000  | ,000  |
|                           | 404310004         | ,000             | ,000  | ,000  | ,000  |
|                           | 502300005         | ,000             | ,000  | ,000  | ,000  |
|                           | 502300006         | ,000             | ,000  | ,000  | ,000  |
|                           | 502300007         | ,000             | ,000  | ,000  | ,000  |
|                           | 502300214         | ,000             | ,000  | ,000  | ,000  |
|                           | 502300411         | ,000             | ,000  | ,000  | ,000  |
|                           | 502300415         | ,000             | ,000  | ,000  | ,000  |
|                           | 502300416         | ,000             | ,000  | ,000  | ,000  |
|                           | 502300811         | ,000             | ,000  | ,000  | ,000  |
|                           | 502300913         | ,000             | ,000  | ,000  | ,000  |
| bv1 belastning vs paencil | 1 medelbelastning |                  |       |       |       |
|                           | 2 underbelastning |                  |       |       |       |
|                           | 3 överbelastning  |                  |       |       |       |

## Categorical Variables Codings

|                           |                   | Parameter coding |       |       |       |
|---------------------------|-------------------|------------------|-------|-------|-------|
|                           |                   | (12)             | (13)  | (14)  | (15)  |
| VASTY2 (SAIR*10000)+VASTY | 403073101         | ,000             | ,000  | ,000  | ,000  |
|                           | 403073102         | ,000             | ,000  | ,000  | ,000  |
|                           | 403073103         | ,000             | ,000  | ,000  | ,000  |
|                           | 403073202         | ,000             | ,000  | ,000  | ,000  |
|                           | 403073203         | ,000             | ,000  | ,000  | ,000  |
|                           | 403073204         | ,000             | ,000  | ,000  | ,000  |
|                           | 403073303         | ,000             | ,000  | ,000  | ,000  |
|                           | 403073651         | ,000             | ,000  | ,000  | ,000  |
|                           | 403073771         | ,000             | ,000  | ,000  | ,000  |
|                           | 403133102         | ,000             | ,000  | ,000  | ,000  |
|                           | 403133106         | ,000             | ,000  | ,000  | ,000  |
|                           | 403133107         | ,000             | ,000  | ,000  | ,000  |
|                           | 403133109         | 1,000            | ,000  | ,000  | ,000  |
|                           | 403133202         | ,000             | 1,000 | ,000  | ,000  |
|                           | 403133203         | ,000             | ,000  | 1,000 | ,000  |
|                           | 403133204         | ,000             | ,000  | ,000  | 1,000 |
|                           | 403133315         | ,000             | ,000  | ,000  | ,000  |
|                           | 403133322         | ,000             | ,000  | ,000  | ,000  |
|                           | 403133401         | ,000             | ,000  | ,000  | ,000  |
|                           | 403133402         | ,000             | ,000  | ,000  | ,000  |
|                           | 403133550         | ,000             | ,000  | ,000  | ,000  |
|                           | 403133772         | ,000             | ,000  | ,000  | ,000  |
|                           | 403135803         | ,000             | ,000  | ,000  | ,000  |
|                           | 404060001         | ,000             | ,000  | ,000  | ,000  |
|                           | 404060002         | ,000             | ,000  | ,000  | ,000  |
|                           | 404310003         | ,000             | ,000  | ,000  | ,000  |
|                           | 404310004         | ,000             | ,000  | ,000  | ,000  |
|                           | 502300005         | ,000             | ,000  | ,000  | ,000  |
|                           | 502300006         | ,000             | ,000  | ,000  | ,000  |
|                           | 502300007         | ,000             | ,000  | ,000  | ,000  |
|                           | 502300214         | ,000             | ,000  | ,000  | ,000  |
|                           | 502300411         | ,000             | ,000  | ,000  | ,000  |
|                           | 502300415         | ,000             | ,000  | ,000  | ,000  |
|                           | 502300416         | ,000             | ,000  | ,000  | ,000  |
|                           | 502300811         | ,000             | ,000  | ,000  | ,000  |
|                           | 502300913         | ,000             | ,000  | ,000  | ,000  |
| bv1 belastning vs paencil | 1 medelbelastning |                  |       |       |       |
|                           | 2 underbelastning |                  |       |       |       |
|                           | 3 överbelastning  |                  |       |       |       |

## Categorical Variables Codings

|                           |                   | Parameter coding |       |       |       |
|---------------------------|-------------------|------------------|-------|-------|-------|
|                           |                   | (16)             | (17)  | (18)  | (19)  |
| VASTY2 (SAIR*10000)+VASTY | 403073101         | ,000             | ,000  | ,000  | ,000  |
|                           | 403073102         | ,000             | ,000  | ,000  | ,000  |
|                           | 403073103         | ,000             | ,000  | ,000  | ,000  |
|                           | 403073202         | ,000             | ,000  | ,000  | ,000  |
|                           | 403073203         | ,000             | ,000  | ,000  | ,000  |
|                           | 403073204         | ,000             | ,000  | ,000  | ,000  |
|                           | 403073303         | ,000             | ,000  | ,000  | ,000  |
|                           | 403073651         | ,000             | ,000  | ,000  | ,000  |
|                           | 403073771         | ,000             | ,000  | ,000  | ,000  |
|                           | 403133102         | ,000             | ,000  | ,000  | ,000  |
|                           | 403133106         | ,000             | ,000  | ,000  | ,000  |
|                           | 403133107         | ,000             | ,000  | ,000  | ,000  |
|                           | 403133109         | ,000             | ,000  | ,000  | ,000  |
|                           | 403133202         | ,000             | ,000  | ,000  | ,000  |
|                           | 403133203         | ,000             | ,000  | ,000  | ,000  |
|                           | 403133204         | ,000             | ,000  | ,000  | ,000  |
|                           | 403133315         | 1,000            | ,000  | ,000  | ,000  |
|                           | 403133322         | ,000             | 1,000 | ,000  | ,000  |
|                           | 403133401         | ,000             | ,000  | 1,000 | ,000  |
|                           | 403133402         | ,000             | ,000  | ,000  | 1,000 |
|                           | 403133550         | ,000             | ,000  | ,000  | ,000  |
|                           | 403133772         | ,000             | ,000  | ,000  | ,000  |
|                           | 403135803         | ,000             | ,000  | ,000  | ,000  |
|                           | 404060001         | ,000             | ,000  | ,000  | ,000  |
|                           | 404060002         | ,000             | ,000  | ,000  | ,000  |
|                           | 404310003         | ,000             | ,000  | ,000  | ,000  |
|                           | 404310004         | ,000             | ,000  | ,000  | ,000  |
|                           | 502300005         | ,000             | ,000  | ,000  | ,000  |
|                           | 502300006         | ,000             | ,000  | ,000  | ,000  |
|                           | 502300007         | ,000             | ,000  | ,000  | ,000  |
|                           | 502300214         | ,000             | ,000  | ,000  | ,000  |
|                           | 502300411         | ,000             | ,000  | ,000  | ,000  |
|                           | 502300415         | ,000             | ,000  | ,000  | ,000  |
|                           | 502300416         | ,000             | ,000  | ,000  | ,000  |
|                           | 502300811         | ,000             | ,000  | ,000  | ,000  |
|                           | 502300913         | ,000             | ,000  | ,000  | ,000  |
| bv1 belastning vs paencil | 1 medelbelastning |                  |       |       |       |
|                           | 2 underbelastning |                  |       |       |       |
|                           | 3 överbelastning  |                  |       |       |       |

## Categorical Variables Codings

|                           |                   | Parameter coding |       |       |       |
|---------------------------|-------------------|------------------|-------|-------|-------|
|                           |                   | (20)             | (21)  | (22)  | (23)  |
| VASTY2 (SAIR*10000)+VASTY | 403073101         | ,000             | ,000  | ,000  | ,000  |
|                           | 403073102         | ,000             | ,000  | ,000  | ,000  |
|                           | 403073103         | ,000             | ,000  | ,000  | ,000  |
|                           | 403073202         | ,000             | ,000  | ,000  | ,000  |
|                           | 403073203         | ,000             | ,000  | ,000  | ,000  |
|                           | 403073204         | ,000             | ,000  | ,000  | ,000  |
|                           | 403073303         | ,000             | ,000  | ,000  | ,000  |
|                           | 403073651         | ,000             | ,000  | ,000  | ,000  |
|                           | 403073771         | ,000             | ,000  | ,000  | ,000  |
|                           | 403133102         | ,000             | ,000  | ,000  | ,000  |
|                           | 403133106         | ,000             | ,000  | ,000  | ,000  |
|                           | 403133107         | ,000             | ,000  | ,000  | ,000  |
|                           | 403133109         | ,000             | ,000  | ,000  | ,000  |
|                           | 403133202         | ,000             | ,000  | ,000  | ,000  |
|                           | 403133203         | ,000             | ,000  | ,000  | ,000  |
|                           | 403133204         | ,000             | ,000  | ,000  | ,000  |
|                           | 403133315         | ,000             | ,000  | ,000  | ,000  |
|                           | 403133322         | ,000             | ,000  | ,000  | ,000  |
|                           | 403133401         | ,000             | ,000  | ,000  | ,000  |
|                           | 403133402         | ,000             | ,000  | ,000  | ,000  |
|                           | 403133550         | 1,000            | ,000  | ,000  | ,000  |
|                           | 403133772         | ,000             | 1,000 | ,000  | ,000  |
|                           | 403135803         | ,000             | ,000  | 1,000 | ,000  |
|                           | 404060001         | ,000             | ,000  | ,000  | 1,000 |
|                           | 404060002         | ,000             | ,000  | ,000  | ,000  |
|                           | 404310003         | ,000             | ,000  | ,000  | ,000  |
|                           | 404310004         | ,000             | ,000  | ,000  | ,000  |
|                           | 502300005         | ,000             | ,000  | ,000  | ,000  |
|                           | 502300006         | ,000             | ,000  | ,000  | ,000  |
|                           | 502300007         | ,000             | ,000  | ,000  | ,000  |
|                           | 502300214         | ,000             | ,000  | ,000  | ,000  |
|                           | 502300411         | ,000             | ,000  | ,000  | ,000  |
|                           | 502300415         | ,000             | ,000  | ,000  | ,000  |
|                           | 502300416         | ,000             | ,000  | ,000  | ,000  |
|                           | 502300811         | ,000             | ,000  | ,000  | ,000  |
|                           | 502300913         | ,000             | ,000  | ,000  | ,000  |
| bv1 belastning vs paencil | 1 medelbelastning |                  |       |       |       |
|                           | 2 underbelastning |                  |       |       |       |
|                           | 3 överbelastning  |                  |       |       |       |

## Categorical Variables Codings

|                           |                   | Parameter coding |       |       |       |
|---------------------------|-------------------|------------------|-------|-------|-------|
|                           |                   | (24)             | (25)  | (26)  | (27)  |
| VASTY2 (SAIR*10000)+VASTY | 403073101         | ,000             | ,000  | ,000  | ,000  |
|                           | 403073102         | ,000             | ,000  | ,000  | ,000  |
|                           | 403073103         | ,000             | ,000  | ,000  | ,000  |
|                           | 403073202         | ,000             | ,000  | ,000  | ,000  |
|                           | 403073203         | ,000             | ,000  | ,000  | ,000  |
|                           | 403073204         | ,000             | ,000  | ,000  | ,000  |
|                           | 403073303         | ,000             | ,000  | ,000  | ,000  |
|                           | 403073651         | ,000             | ,000  | ,000  | ,000  |
|                           | 403073771         | ,000             | ,000  | ,000  | ,000  |
|                           | 403133102         | ,000             | ,000  | ,000  | ,000  |
|                           | 403133106         | ,000             | ,000  | ,000  | ,000  |
|                           | 403133107         | ,000             | ,000  | ,000  | ,000  |
|                           | 403133109         | ,000             | ,000  | ,000  | ,000  |
|                           | 403133202         | ,000             | ,000  | ,000  | ,000  |
|                           | 403133203         | ,000             | ,000  | ,000  | ,000  |
|                           | 403133204         | ,000             | ,000  | ,000  | ,000  |
|                           | 403133315         | ,000             | ,000  | ,000  | ,000  |
|                           | 403133322         | ,000             | ,000  | ,000  | ,000  |
|                           | 403133401         | ,000             | ,000  | ,000  | ,000  |
|                           | 403133402         | ,000             | ,000  | ,000  | ,000  |
|                           | 403133550         | ,000             | ,000  | ,000  | ,000  |
|                           | 403133772         | ,000             | ,000  | ,000  | ,000  |
|                           | 403135803         | ,000             | ,000  | ,000  | ,000  |
|                           | 404060001         | ,000             | ,000  | ,000  | ,000  |
|                           | 404060002         | 1,000            | ,000  | ,000  | ,000  |
|                           | 404310003         | ,000             | 1,000 | ,000  | ,000  |
|                           | 404310004         | ,000             | ,000  | 1,000 | ,000  |
|                           | 502300005         | ,000             | ,000  | ,000  | 1,000 |
|                           | 502300006         | ,000             | ,000  | ,000  | ,000  |
|                           | 502300007         | ,000             | ,000  | ,000  | ,000  |
|                           | 502300214         | ,000             | ,000  | ,000  | ,000  |
|                           | 502300411         | ,000             | ,000  | ,000  | ,000  |
|                           | 502300415         | ,000             | ,000  | ,000  | ,000  |
|                           | 502300416         | ,000             | ,000  | ,000  | ,000  |
|                           | 502300811         | ,000             | ,000  | ,000  | ,000  |
|                           | 502300913         | ,000             | ,000  | ,000  | ,000  |
| bv1 belastning vs paencil | 1 medelbelastning |                  |       |       |       |
|                           | 2 underbelastning |                  |       |       |       |
|                           | 3 överbelastning  |                  |       |       |       |

## Categorical Variables Codings

|                           |                   | Parameter coding |       |       |       |
|---------------------------|-------------------|------------------|-------|-------|-------|
|                           |                   | (28)             | (29)  | (30)  | (31)  |
| VASTY2 (SAIR*10000)+VASTY | 403073101         | ,000             | ,000  | ,000  | ,000  |
|                           | 403073102         | ,000             | ,000  | ,000  | ,000  |
|                           | 403073103         | ,000             | ,000  | ,000  | ,000  |
|                           | 403073202         | ,000             | ,000  | ,000  | ,000  |
|                           | 403073203         | ,000             | ,000  | ,000  | ,000  |
|                           | 403073204         | ,000             | ,000  | ,000  | ,000  |
|                           | 403073303         | ,000             | ,000  | ,000  | ,000  |
|                           | 403073651         | ,000             | ,000  | ,000  | ,000  |
|                           | 403073771         | ,000             | ,000  | ,000  | ,000  |
|                           | 403133102         | ,000             | ,000  | ,000  | ,000  |
|                           | 403133106         | ,000             | ,000  | ,000  | ,000  |
|                           | 403133107         | ,000             | ,000  | ,000  | ,000  |
|                           | 403133109         | ,000             | ,000  | ,000  | ,000  |
|                           | 403133202         | ,000             | ,000  | ,000  | ,000  |
|                           | 403133203         | ,000             | ,000  | ,000  | ,000  |
|                           | 403133204         | ,000             | ,000  | ,000  | ,000  |
|                           | 403133315         | ,000             | ,000  | ,000  | ,000  |
|                           | 403133322         | ,000             | ,000  | ,000  | ,000  |
|                           | 403133401         | ,000             | ,000  | ,000  | ,000  |
|                           | 403133402         | ,000             | ,000  | ,000  | ,000  |
|                           | 403133550         | ,000             | ,000  | ,000  | ,000  |
|                           | 403133772         | ,000             | ,000  | ,000  | ,000  |
|                           | 403135803         | ,000             | ,000  | ,000  | ,000  |
|                           | 404060001         | ,000             | ,000  | ,000  | ,000  |
|                           | 404060002         | ,000             | ,000  | ,000  | ,000  |
|                           | 404310003         | ,000             | ,000  | ,000  | ,000  |
|                           | 404310004         | ,000             | ,000  | ,000  | ,000  |
|                           | 502300005         | ,000             | ,000  | ,000  | ,000  |
|                           | 502300006         | 1,000            | ,000  | ,000  | ,000  |
|                           | 502300007         | ,000             | 1,000 | ,000  | ,000  |
|                           | 502300214         | ,000             | ,000  | 1,000 | ,000  |
|                           | 502300411         | ,000             | ,000  | ,000  | 1,000 |
|                           | 502300415         | ,000             | ,000  | ,000  | ,000  |
|                           | 502300416         | ,000             | ,000  | ,000  | ,000  |
|                           | 502300811         | ,000             | ,000  | ,000  | ,000  |
|                           | 502300913         | ,000             | ,000  | ,000  | ,000  |
| bv1 belastning vs paencil | 1 medelbelastning |                  |       |       |       |
|                           | 2 underbelastning |                  |       |       |       |
|                           | 3 överbelastning  |                  |       |       |       |



## Categorical Variables Codings

|                           |                   | Parameter coding |       |       |       |
|---------------------------|-------------------|------------------|-------|-------|-------|
|                           |                   | (32)             | (33)  | (34)  | (35)  |
| VASTY2 (SAIR*10000)+VASTY | 403073101         | ,000             | ,000  | ,000  | ,000  |
|                           | 403073102         | ,000             | ,000  | ,000  | ,000  |
|                           | 403073103         | ,000             | ,000  | ,000  | ,000  |
|                           | 403073202         | ,000             | ,000  | ,000  | ,000  |
|                           | 403073203         | ,000             | ,000  | ,000  | ,000  |
|                           | 403073204         | ,000             | ,000  | ,000  | ,000  |
|                           | 403073303         | ,000             | ,000  | ,000  | ,000  |
|                           | 403073651         | ,000             | ,000  | ,000  | ,000  |
|                           | 403073771         | ,000             | ,000  | ,000  | ,000  |
|                           | 403133102         | ,000             | ,000  | ,000  | ,000  |
|                           | 403133106         | ,000             | ,000  | ,000  | ,000  |
|                           | 403133107         | ,000             | ,000  | ,000  | ,000  |
|                           | 403133109         | ,000             | ,000  | ,000  | ,000  |
|                           | 403133202         | ,000             | ,000  | ,000  | ,000  |
|                           | 403133203         | ,000             | ,000  | ,000  | ,000  |
|                           | 403133204         | ,000             | ,000  | ,000  | ,000  |
|                           | 403133315         | ,000             | ,000  | ,000  | ,000  |
|                           | 403133322         | ,000             | ,000  | ,000  | ,000  |
|                           | 403133401         | ,000             | ,000  | ,000  | ,000  |
|                           | 403133402         | ,000             | ,000  | ,000  | ,000  |
|                           | 403133550         | ,000             | ,000  | ,000  | ,000  |
|                           | 403133772         | ,000             | ,000  | ,000  | ,000  |
|                           | 403135803         | ,000             | ,000  | ,000  | ,000  |
|                           | 404060001         | ,000             | ,000  | ,000  | ,000  |
|                           | 404060002         | ,000             | ,000  | ,000  | ,000  |
|                           | 404310003         | ,000             | ,000  | ,000  | ,000  |
|                           | 404310004         | ,000             | ,000  | ,000  | ,000  |
|                           | 502300005         | ,000             | ,000  | ,000  | ,000  |
|                           | 502300006         | ,000             | ,000  | ,000  | ,000  |
|                           | 502300007         | ,000             | ,000  | ,000  | ,000  |
|                           | 502300214         | ,000             | ,000  | ,000  | ,000  |
|                           | 502300411         | ,000             | ,000  | ,000  | ,000  |
|                           | 502300415         | 1,000            | ,000  | ,000  | ,000  |
|                           | 502300416         | ,000             | 1,000 | ,000  | ,000  |
|                           | 502300811         | ,000             | ,000  | 1,000 | ,000  |
|                           | 502300913         | ,000             | ,000  | ,000  | 1,000 |
| bv1 belastning vs paencil | 1 medelbelastning |                  |       |       |       |
|                           | 2 underbelastning |                  |       |       |       |
|                           | 3 överbelastning  |                  |       |       |       |

**Block 0: Beginning Block**

Classification Table<sup>a,b</sup>

| Observed           |                              |                     | Predicted        |                     |
|--------------------|------------------------------|---------------------|------------------|---------------------|
|                    |                              |                     | 0 ingen hændelse | 1 minst en hændelse |
| Step 0             | hand01 hændelse nej eller ja | 0 ingen hændelse    | 11108            | 0                   |
|                    |                              | 1 minst en hændelse | 1367             | 0                   |
| Overall Percentage |                              |                     |                  |                     |

Classification Table<sup>a,b</sup>

| Observed           |                              |                     | Predicted          |
|--------------------|------------------------------|---------------------|--------------------|
|                    |                              |                     | Percentage Correct |
| Step 0             | hand01 hændelse nej eller ja | 0 ingen hændelse    | 100,0              |
|                    |                              | 1 minst en hændelse | ,0                 |
| Overall Percentage |                              |                     | 89,0               |

a. Constant is included in the model.

b. The cut value is ,500

Variables in the Equation

|                 | B      | S.E. | Wald     | df | Sig. | Exp(B) |
|-----------------|--------|------|----------|----|------|--------|
| Step 0 Constant | -2,095 | ,029 | 5342,584 | 1  | ,000 | ,123   |

## Variables not in the Equation

|        |                    |            | Score   | df | Sig. |
|--------|--------------------|------------|---------|----|------|
| Step 0 | Variables          | bv1        | 64,197  | 2  | ,000 |
|        |                    | bv1(1)     | 48,244  | 1  | ,000 |
|        |                    | bv1(2)     | 41,190  | 1  | ,000 |
|        |                    | VASTY2     | 541,214 | 35 | ,000 |
|        |                    | VASTY2(1)  | 1,169   | 1  | ,280 |
|        |                    | VASTY2(2)  | 87,511  | 1  | ,000 |
|        |                    | VASTY2(3)  | 13,995  | 1  | ,000 |
|        |                    | VASTY2(4)  | ,464    | 1  | ,496 |
|        |                    | VASTY2(5)  | 5,526   | 1  | ,019 |
|        |                    | VASTY2(6)  | 19,435  | 1  | ,000 |
|        |                    | VASTY2(7)  | 86,074  | 1  | ,000 |
|        |                    | VASTY2(8)  | 1,043   | 1  | ,307 |
|        |                    | VASTY2(9)  | ,408    | 1  | ,523 |
|        |                    | VASTY2(10) | 58,583  | 1  | ,000 |
|        |                    | VASTY2(11) | 33,445  | 1  | ,000 |
|        |                    | VASTY2(12) | ,029    | 1  | ,865 |
|        |                    | VASTY2(13) | 33,445  | 1  | ,000 |
|        |                    | VASTY2(14) | 4,163   | 1  | ,041 |
|        |                    | VASTY2(15) | ,464    | 1  | ,496 |
|        |                    | VASTY2(16) | ,763    | 1  | ,382 |
|        |                    | VASTY2(17) | 24,320  | 1  | ,000 |
|        |                    | VASTY2(18) | 17,742  | 1  | ,000 |
|        |                    | VASTY2(19) | 27,791  | 1  | ,000 |
|        |                    | VASTY2(20) | ,015    | 1  | ,902 |
|        |                    | VASTY2(21) | 2,890   | 1  | ,089 |
|        |                    | VASTY2(22) | ,462    | 1  | ,497 |
|        |                    | VASTY2(23) | 15,306  | 1  | ,000 |
|        |                    | VASTY2(24) | 12,594  | 1  | ,000 |
|        |                    | VASTY2(25) | ,128    | 1  | ,720 |
|        |                    | VASTY2(26) | 12,864  | 1  | ,000 |
|        |                    | VASTY2(27) | 24,439  | 1  | ,000 |
|        |                    | VASTY2(28) | 9,963   | 1  | ,002 |
|        |                    | VASTY2(29) | 18,184  | 1  | ,000 |
|        |                    | VASTY2(30) | ,486    | 1  | ,486 |
|        |                    | VASTY2(31) | 6,400   | 1  | ,011 |
|        |                    | VASTY2(32) | 1,626   | 1  | ,202 |
|        |                    | VASTY2(33) | 1,336   | 1  | ,248 |
|        |                    | VASTY2(34) | 29,489  | 1  | ,000 |
|        |                    | VASTY2(35) | 3,668   | 1  | ,055 |
|        | Overall Statistics |            | 573,462 | 37 | ,000 |

**Block 1: Method = Enter**

## Omnibus Tests of Model Coefficients

|        |       | Chi-square | df | Sig. |
|--------|-------|------------|----|------|
| Step 1 | Step  | 572,673    | 37 | ,000 |
|        | Block | 572,673    | 37 | ,000 |
|        | Model | 572,673    | 37 | ,000 |

## Model Summary

| Step | -2 Log likelihood     | Cox & Snell R Square | Nagelkerke R Square |
|------|-----------------------|----------------------|---------------------|
| 1    | 8050,910 <sup>a</sup> | ,045                 | ,090                |

a. Estimation terminated at iteration number 6 because parameter estimates changed by less than ,001.

Classification Table<sup>a</sup>

| Observed           |                              | Predicted                    |                     |   |
|--------------------|------------------------------|------------------------------|---------------------|---|
|                    |                              | hand01 hændelse nej eller ja |                     |   |
|                    |                              | 0 ingen hændelse             | 1 minst en hændelse |   |
| Step 1             | hand01 hændelse nej eller ja | 0 ingen hændelse             | 11108               | 0 |
|                    |                              | 1 minst en hændelse          | 1367                | 0 |
| Overall Percentage |                              |                              |                     |   |

Classification Table<sup>a</sup>

| Observed           |                              | Predicted           |       |
|--------------------|------------------------------|---------------------|-------|
|                    |                              | Percentage Correct  |       |
| Step 1             | hand01 hændelse nej eller ja | 0 ingen hændelse    | 100,0 |
|                    |                              | 1 minst en hændelse | ,0    |
| Overall Percentage |                              |                     | 89,0  |

a. The cut value is ,500

## Variables in the Equation

|                         | B      | S.E. | Wald    | df | Sig. | Exp(B) |
|-------------------------|--------|------|---------|----|------|--------|
| Step 1 <sup>a</sup> bv1 |        |      | 33,531  | 2  | ,000 |        |
| bv1(1)                  | -,273  | ,084 | 10,589  | 1  | ,001 | ,761   |
| bv1(2)                  | ,236   | ,069 | 11,724  | 1  | ,001 | 1,267  |
| VASTY2                  |        |      | 430,566 | 35 | ,000 |        |
| VASTY2(1)               | ,335   | ,240 | 1,952   | 1  | ,162 | 1,398  |
| VASTY2(2)               | 1,183  | ,216 | 29,867  | 1  | ,000 | 3,264  |
| VASTY2(3)               | -,863  | ,304 | 8,076   | 1  | ,004 | ,422   |
| VASTY2(4)               | ,149   | ,243 | ,373    | 1  | ,541 | 1,160  |
| VASTY2(5)               | -,382  | ,282 | 1,835   | 1  | ,176 | ,682   |
| VASTY2(6)               | -1,058 | ,328 | 10,418  | 1  | ,001 | ,347   |
| VASTY2(7)               | 1,041  | ,220 | 22,367  | 1  | ,000 | 2,831  |
| VASTY2(8)               | ,251   | ,240 | 1,091   | 1  | ,296 | 1,285  |
| VASTY2(9)               | ,187   | ,246 | ,575    | 1  | ,448 | 1,205  |
| VASTY2(10)              | 1,007  | ,219 | 21,086  | 1  | ,000 | 2,737  |
| VASTY2(11)              | ,871   | ,223 | 15,290  | 1  | ,000 | 2,390  |
| VASTY2(12)              | ,073   | ,248 | ,087    | 1  | ,768 | 1,076  |
| VASTY2(13)              | ,747   | ,224 | 11,090  | 1  | ,001 | 2,110  |
| VASTY2(14)              | -,305  | ,268 | 1,298   | 1  | ,255 | ,737   |
| VASTY2(15)              | ,225   | ,242 | ,868    | 1  | ,351 | 1,253  |
| VASTY2(16)              | ,339   | ,288 | 1,382   | 1  | ,240 | 1,403  |
| VASTY2(17)              | -1,178 | ,356 | 10,981  | 1  | ,001 | ,308   |
| VASTY2(18)              | -,881  | ,320 | 7,585   | 1  | ,006 | ,414   |
| VASTY2(19)              | -1,194 | ,386 | 9,555   | 1  | ,002 | ,303   |
| VASTY2(20)              | ,059   | ,261 | ,051    | 1  | ,821 | 1,061  |
| VASTY2(21)              | -,188  | ,263 | ,512    | 1  | ,474 | ,829   |
| VASTY2(22)              | ,160   | ,252 | ,400    | 1  | ,527 | 1,173  |
| VASTY2(23)              | ,731   | ,228 | 10,316  | 1  | ,001 | 2,077  |
| VASTY2(24)              | ,530   | ,230 | 5,313   | 1  | ,021 | 1,699  |
| VASTY2(25)              | ,123   | ,264 | ,216    | 1  | ,642 | 1,131  |
| VASTY2(26)              | -,864  | ,337 | 6,584   | 1  | ,010 | ,421   |
| VASTY2(27)              | -1,303 | ,356 | 13,384  | 1  | ,000 | ,272   |
| VASTY2(28)              | -,918  | ,371 | 6,121   | 1  | ,013 | ,399   |
| VASTY2(29)              | -,942  | ,320 | 8,679   | 1  | ,003 | ,390   |
| VASTY2(30)              | ,003   | ,252 | ,000    | 1  | ,991 | 1,003  |
| VASTY2(31)              | ,518   | ,233 | 4,927   | 1  | ,026 | 1,679  |
| VASTY2(32)              | -,020  | ,259 | ,006    | 1  | ,939 | ,980   |
| VASTY2(33)              | -,013  | ,257 | ,002    | 1  | ,961 | ,987   |
| VASTY2(34)              | -1,557 | ,401 | 15,103  | 1  | ,000 | ,211   |
| VASTY2(35)              | ,348   | ,244 | 2,032   | 1  | ,154 | 1,416  |
| Constant                | -2,236 | ,182 | 150,660 | 1  | ,000 | ,107   |

## Variables in the Equation

|                     |            | 95% C.I. for EXP(B) |       |
|---------------------|------------|---------------------|-------|
|                     |            | Lower               | Upper |
| Step 1 <sup>a</sup> | bv1        |                     |       |
|                     | bv1(1)     | ,646                | ,897  |
|                     | bv1(2)     | 1,106               | 1,450 |
|                     | VASTY2     |                     |       |
|                     | VASTY2(1)  | ,874                | 2,237 |
|                     | VASTY2(2)  | 2,136               | 4,990 |
|                     | VASTY2(3)  | ,233                | ,765  |
|                     | VASTY2(4)  | ,720                | 1,869 |
|                     | VASTY2(5)  | ,393                | 1,186 |
|                     | VASTY2(6)  | ,183                | ,660  |
|                     | VASTY2(7)  | 1,839               | 4,357 |
|                     | VASTY2(8)  | ,803                | 2,058 |
|                     | VASTY2(9)  | ,744                | 1,953 |
|                     | VASTY2(10) | 1,781               | 4,205 |
|                     | VASTY2(11) | 1,544               | 3,699 |
|                     | VASTY2(12) | ,662                | 1,749 |
|                     | VASTY2(13) | 1,360               | 3,275 |
|                     | VASTY2(14) | ,436                | 1,246 |
|                     | VASTY2(15) | ,780                | 2,013 |
|                     | VASTY2(16) | ,798                | 2,468 |
|                     | VASTY2(17) | ,153                | ,618  |
|                     | VASTY2(18) | ,221                | ,776  |
|                     | VASTY2(19) | ,142                | ,646  |
|                     | VASTY2(20) | ,636                | 1,770 |
|                     | VASTY2(21) | ,495                | 1,387 |
|                     | VASTY2(22) | ,715                | 1,924 |
|                     | VASTY2(23) | 1,330               | 3,245 |
|                     | VASTY2(24) | 1,083               | 2,666 |
|                     | VASTY2(25) | ,674                | 1,897 |
|                     | VASTY2(26) | ,218                | ,815  |
|                     | VASTY2(27) | ,135                | ,546  |
|                     | VASTY2(28) | ,193                | ,826  |
|                     | VASTY2(29) | ,208                | ,730  |
|                     | VASTY2(30) | ,612                | 1,643 |
|                     | VASTY2(31) | 1,062               | 2,652 |
|                     | VASTY2(32) | ,590                | 1,630 |
|                     | VASTY2(33) | ,596                | 1,635 |
|                     | VASTY2(34) | ,096                | ,462  |
|                     | VASTY2(35) | ,878                | 2,284 |
|                     | Constant   |                     |       |

a. Variable(s) entered on step 1: bv1, VASTY2.

```

1
2
3 LOGISTIC REGRESSION VARIABLES hand01
4   /METHOD=ENTER bv2 VASTY2
5   /CONTRAST (bv2)=Indicator(1)
6   /CONTRAST (VASTY2)=Indicator(1)
7   /PRINT=CI(95)
8   /CRITERIA=PIN(0.05) POUT(0.10) ITERATE(20) CUT(0.5).
9
10
11

```

## Logistic Regression

[DataSet6] C:\cWordjan\Rafaela\_VCS\alla\_tillsammans\abo\_bjo\_vasa\_v1.sav

### Case Processing Summary

| Unweighted Cases <sup>a</sup> |                      | N     | Percent |
|-------------------------------|----------------------|-------|---------|
| Selected Cases                | Included in Analysis | 12475 | 100,0   |
|                               | Missing Cases        | 0     | ,0      |
|                               | Total                | 12475 | 100,0   |
| Unselected Cases              |                      | 0     | ,0      |
| Total                         |                      | 12475 | 100,0   |

a. If weight is in effect, see classification table for the total number of cases.

### Dependent Variable Encoding

| Original Value      | Internal Value |
|---------------------|----------------|
| 0 ingen händelse    | 0              |
| 1 minst en händelse | 1              |

## Categorical Variables Codings

|                                             |                   | Frequency | Parameter coding |       |
|---------------------------------------------|-------------------|-----------|------------------|-------|
|                                             |                   |           | (1)              | (2)   |
| VASTY2 (SAIR*10000)+VASTY                   | 403073101         | 365       | ,000             | ,000  |
|                                             | 403073102         | 362       | 1,000            | ,000  |
|                                             | 403073103         | 365       | ,000             | 1,000 |
|                                             | 403073202         | 365       | ,000             | ,000  |
|                                             | 403073203         | 365       | ,000             | ,000  |
|                                             | 403073204         | 330       | ,000             | ,000  |
|                                             | 403073303         | 364       | ,000             | ,000  |
|                                             | 403073651         | 362       | ,000             | ,000  |
|                                             | 403073771         | 365       | ,000             | ,000  |
|                                             | 403133102         | 341       | ,000             | ,000  |
|                                             | 403133106         | 365       | ,000             | ,000  |
|                                             | 403133107         | 365       | ,000             | ,000  |
|                                             | 403133109         | 365       | ,000             | ,000  |
|                                             | 403133202         | 365       | ,000             | ,000  |
|                                             | 403133203         | 365       | ,000             | ,000  |
|                                             | 403133204         | 365       | ,000             | ,000  |
|                                             | 403133315         | 177       | ,000             | ,000  |
|                                             | 403133322         | 365       | ,000             | ,000  |
|                                             | 403133401         | 362       | ,000             | ,000  |
|                                             | 403133402         | 365       | ,000             | ,000  |
|                                             | 403133550         | 298       | ,000             | ,000  |
|                                             | 403133772         | 365       | ,000             | ,000  |
|                                             | 403135803         | 365       | ,000             | ,000  |
|                                             | 404060001         | 365       | ,000             | ,000  |
|                                             | 404060002         | 366       | ,000             | ,000  |
|                                             | 404310003         | 291       | ,000             | ,000  |
|                                             | 404310004         | 291       | ,000             | ,000  |
|                                             | 502300005         | 366       | ,000             | ,000  |
|                                             | 502300006         | 225       | ,000             | ,000  |
|                                             | 502300007         | 366       | ,000             | ,000  |
|                                             | 502300214         | 366       | ,000             | ,000  |
|                                             | 502300411         | 366       | ,000             | ,000  |
|                                             | 502300415         | 360       | ,000             | ,000  |
|                                             | 502300416         | 363       | ,000             | ,000  |
|                                             | 502300811         | 364       | ,000             | ,000  |
|                                             | 502300913         | 315       | ,000             | ,000  |
| bv2 belastning vs paoncil halva intervallet | 1 medelbelastning | 2788      | ,000             | ,000  |
|                                             | 2 underbelastning | 4419      | 1,000            | ,000  |
|                                             | 3 överbelastning  | 5268      | ,000             | 1,000 |



## Categorical Variables Codings

|                                             |                   | Parameter coding |       |       |
|---------------------------------------------|-------------------|------------------|-------|-------|
|                                             |                   | (3)              | (4)   | (5)   |
| VASTY2 (SAIR*10000)+VASTY                   | 403073101         | ,000             | ,000  | ,000  |
|                                             | 403073102         | ,000             | ,000  | ,000  |
|                                             | 403073103         | ,000             | ,000  | ,000  |
|                                             | 403073202         | 1,000            | ,000  | ,000  |
|                                             | 403073203         | ,000             | 1,000 | ,000  |
|                                             | 403073204         | ,000             | ,000  | 1,000 |
|                                             | 403073303         | ,000             | ,000  | ,000  |
|                                             | 403073651         | ,000             | ,000  | ,000  |
|                                             | 403073771         | ,000             | ,000  | ,000  |
|                                             | 403133102         | ,000             | ,000  | ,000  |
|                                             | 403133106         | ,000             | ,000  | ,000  |
|                                             | 403133107         | ,000             | ,000  | ,000  |
|                                             | 403133109         | ,000             | ,000  | ,000  |
|                                             | 403133202         | ,000             | ,000  | ,000  |
|                                             | 403133203         | ,000             | ,000  | ,000  |
|                                             | 403133204         | ,000             | ,000  | ,000  |
|                                             | 403133315         | ,000             | ,000  | ,000  |
|                                             | 403133322         | ,000             | ,000  | ,000  |
|                                             | 403133401         | ,000             | ,000  | ,000  |
|                                             | 403133402         | ,000             | ,000  | ,000  |
|                                             | 403133550         | ,000             | ,000  | ,000  |
|                                             | 403133772         | ,000             | ,000  | ,000  |
|                                             | 403135803         | ,000             | ,000  | ,000  |
|                                             | 404060001         | ,000             | ,000  | ,000  |
|                                             | 404060002         | ,000             | ,000  | ,000  |
|                                             | 404310003         | ,000             | ,000  | ,000  |
|                                             | 404310004         | ,000             | ,000  | ,000  |
|                                             | 502300005         | ,000             | ,000  | ,000  |
|                                             | 502300006         | ,000             | ,000  | ,000  |
|                                             | 502300007         | ,000             | ,000  | ,000  |
|                                             | 502300214         | ,000             | ,000  | ,000  |
|                                             | 502300411         | ,000             | ,000  | ,000  |
|                                             | 502300415         | ,000             | ,000  | ,000  |
|                                             | 502300416         | ,000             | ,000  | ,000  |
|                                             | 502300811         | ,000             | ,000  | ,000  |
|                                             | 502300913         | ,000             | ,000  | ,000  |
| bv2 belastning vs paoncil halva intervallet | 1 medelbelastning |                  |       |       |
|                                             | 2 underbelastning |                  |       |       |
|                                             | 3 överbelastning  |                  |       |       |

## Categorical Variables Codings

|                                             |                   | Parameter coding |       |       |
|---------------------------------------------|-------------------|------------------|-------|-------|
|                                             |                   | (6)              | (7)   | (8)   |
| VASTY2 (SAIR*10000)+VASTY                   | 403073101         | ,000             | ,000  | ,000  |
|                                             | 403073102         | ,000             | ,000  | ,000  |
|                                             | 403073103         | ,000             | ,000  | ,000  |
|                                             | 403073202         | ,000             | ,000  | ,000  |
|                                             | 403073203         | ,000             | ,000  | ,000  |
|                                             | 403073204         | ,000             | ,000  | ,000  |
|                                             | 403073303         | 1,000            | ,000  | ,000  |
|                                             | 403073651         | ,000             | 1,000 | ,000  |
|                                             | 403073771         | ,000             | ,000  | 1,000 |
|                                             | 403133102         | ,000             | ,000  | ,000  |
|                                             | 403133106         | ,000             | ,000  | ,000  |
|                                             | 403133107         | ,000             | ,000  | ,000  |
|                                             | 403133109         | ,000             | ,000  | ,000  |
|                                             | 403133202         | ,000             | ,000  | ,000  |
|                                             | 403133203         | ,000             | ,000  | ,000  |
|                                             | 403133204         | ,000             | ,000  | ,000  |
|                                             | 403133315         | ,000             | ,000  | ,000  |
|                                             | 403133322         | ,000             | ,000  | ,000  |
|                                             | 403133401         | ,000             | ,000  | ,000  |
|                                             | 403133402         | ,000             | ,000  | ,000  |
|                                             | 403133550         | ,000             | ,000  | ,000  |
|                                             | 403133772         | ,000             | ,000  | ,000  |
|                                             | 403135803         | ,000             | ,000  | ,000  |
|                                             | 404060001         | ,000             | ,000  | ,000  |
|                                             | 404060002         | ,000             | ,000  | ,000  |
|                                             | 404310003         | ,000             | ,000  | ,000  |
|                                             | 404310004         | ,000             | ,000  | ,000  |
|                                             | 502300005         | ,000             | ,000  | ,000  |
|                                             | 502300006         | ,000             | ,000  | ,000  |
|                                             | 502300007         | ,000             | ,000  | ,000  |
|                                             | 502300214         | ,000             | ,000  | ,000  |
|                                             | 502300411         | ,000             | ,000  | ,000  |
|                                             | 502300415         | ,000             | ,000  | ,000  |
|                                             | 502300416         | ,000             | ,000  | ,000  |
|                                             | 502300811         | ,000             | ,000  | ,000  |
|                                             | 502300913         | ,000             | ,000  | ,000  |
| bv2 belastning vs paoncil halva intervallet | 1 medelbelastning |                  |       |       |
|                                             | 2 underbelastning |                  |       |       |
|                                             | 3 överbelastning  |                  |       |       |

## Categorical Variables Codings

|                                             |                   | Parameter coding |       |       |
|---------------------------------------------|-------------------|------------------|-------|-------|
|                                             |                   | (9)              | (10)  | (11)  |
| VASTY2 (SAIR*10000)+VASTY                   | 403073101         | ,000             | ,000  | ,000  |
|                                             | 403073102         | ,000             | ,000  | ,000  |
|                                             | 403073103         | ,000             | ,000  | ,000  |
|                                             | 403073202         | ,000             | ,000  | ,000  |
|                                             | 403073203         | ,000             | ,000  | ,000  |
|                                             | 403073204         | ,000             | ,000  | ,000  |
|                                             | 403073303         | ,000             | ,000  | ,000  |
|                                             | 403073651         | ,000             | ,000  | ,000  |
|                                             | 403073771         | ,000             | ,000  | ,000  |
|                                             | 403133102         | 1,000            | ,000  | ,000  |
|                                             | 403133106         | ,000             | 1,000 | ,000  |
|                                             | 403133107         | ,000             | ,000  | 1,000 |
|                                             | 403133109         | ,000             | ,000  | ,000  |
|                                             | 403133202         | ,000             | ,000  | ,000  |
|                                             | 403133203         | ,000             | ,000  | ,000  |
|                                             | 403133204         | ,000             | ,000  | ,000  |
|                                             | 403133315         | ,000             | ,000  | ,000  |
|                                             | 403133322         | ,000             | ,000  | ,000  |
|                                             | 403133401         | ,000             | ,000  | ,000  |
|                                             | 403133402         | ,000             | ,000  | ,000  |
|                                             | 403133550         | ,000             | ,000  | ,000  |
|                                             | 403133772         | ,000             | ,000  | ,000  |
|                                             | 403135803         | ,000             | ,000  | ,000  |
|                                             | 404060001         | ,000             | ,000  | ,000  |
|                                             | 404060002         | ,000             | ,000  | ,000  |
|                                             | 404310003         | ,000             | ,000  | ,000  |
|                                             | 404310004         | ,000             | ,000  | ,000  |
|                                             | 502300005         | ,000             | ,000  | ,000  |
|                                             | 502300006         | ,000             | ,000  | ,000  |
|                                             | 502300007         | ,000             | ,000  | ,000  |
|                                             | 502300214         | ,000             | ,000  | ,000  |
|                                             | 502300411         | ,000             | ,000  | ,000  |
|                                             | 502300415         | ,000             | ,000  | ,000  |
|                                             | 502300416         | ,000             | ,000  | ,000  |
|                                             | 502300811         | ,000             | ,000  | ,000  |
|                                             | 502300913         | ,000             | ,000  | ,000  |
| bv2 belastning vs paoncil halva intervallet | 1 medelbelastning |                  |       |       |
|                                             | 2 underbelastning |                  |       |       |
|                                             | 3 överbelastning  |                  |       |       |

## Categorical Variables Codings

|                                             |                   | Parameter coding |       |       |
|---------------------------------------------|-------------------|------------------|-------|-------|
|                                             |                   | (12)             | (13)  | (14)  |
| VASTY2 (SAIR*10000)+VASTY                   | 403073101         | ,000             | ,000  | ,000  |
|                                             | 403073102         | ,000             | ,000  | ,000  |
|                                             | 403073103         | ,000             | ,000  | ,000  |
|                                             | 403073202         | ,000             | ,000  | ,000  |
|                                             | 403073203         | ,000             | ,000  | ,000  |
|                                             | 403073204         | ,000             | ,000  | ,000  |
|                                             | 403073303         | ,000             | ,000  | ,000  |
|                                             | 403073651         | ,000             | ,000  | ,000  |
|                                             | 403073771         | ,000             | ,000  | ,000  |
|                                             | 403133102         | ,000             | ,000  | ,000  |
|                                             | 403133106         | ,000             | ,000  | ,000  |
|                                             | 403133107         | ,000             | ,000  | ,000  |
|                                             | 403133109         | 1,000            | ,000  | ,000  |
|                                             | 403133202         | ,000             | 1,000 | ,000  |
|                                             | 403133203         | ,000             | ,000  | 1,000 |
|                                             | 403133204         | ,000             | ,000  | ,000  |
|                                             | 403133315         | ,000             | ,000  | ,000  |
|                                             | 403133322         | ,000             | ,000  | ,000  |
|                                             | 403133401         | ,000             | ,000  | ,000  |
|                                             | 403133402         | ,000             | ,000  | ,000  |
|                                             | 403133550         | ,000             | ,000  | ,000  |
|                                             | 403133772         | ,000             | ,000  | ,000  |
|                                             | 403135803         | ,000             | ,000  | ,000  |
|                                             | 404060001         | ,000             | ,000  | ,000  |
|                                             | 404060002         | ,000             | ,000  | ,000  |
|                                             | 404310003         | ,000             | ,000  | ,000  |
|                                             | 404310004         | ,000             | ,000  | ,000  |
|                                             | 502300005         | ,000             | ,000  | ,000  |
|                                             | 502300006         | ,000             | ,000  | ,000  |
|                                             | 502300007         | ,000             | ,000  | ,000  |
|                                             | 502300214         | ,000             | ,000  | ,000  |
|                                             | 502300411         | ,000             | ,000  | ,000  |
|                                             | 502300415         | ,000             | ,000  | ,000  |
|                                             | 502300416         | ,000             | ,000  | ,000  |
|                                             | 502300811         | ,000             | ,000  | ,000  |
|                                             | 502300913         | ,000             | ,000  | ,000  |
| bv2 belastning vs paoncil halva intervallet | 1 medelbelastning |                  |       |       |
|                                             | 2 underbelastning |                  |       |       |
|                                             | 3 överbelastning  |                  |       |       |

## Categorical Variables Codings

|                                             |                   | Parameter coding |       |       |
|---------------------------------------------|-------------------|------------------|-------|-------|
|                                             |                   | (15)             | (16)  | (17)  |
| VASTY2 (SAIR*10000)+VASTY                   | 403073101         | ,000             | ,000  | ,000  |
|                                             | 403073102         | ,000             | ,000  | ,000  |
|                                             | 403073103         | ,000             | ,000  | ,000  |
|                                             | 403073202         | ,000             | ,000  | ,000  |
|                                             | 403073203         | ,000             | ,000  | ,000  |
|                                             | 403073204         | ,000             | ,000  | ,000  |
|                                             | 403073303         | ,000             | ,000  | ,000  |
|                                             | 403073651         | ,000             | ,000  | ,000  |
|                                             | 403073771         | ,000             | ,000  | ,000  |
|                                             | 403133102         | ,000             | ,000  | ,000  |
|                                             | 403133106         | ,000             | ,000  | ,000  |
|                                             | 403133107         | ,000             | ,000  | ,000  |
|                                             | 403133109         | ,000             | ,000  | ,000  |
|                                             | 403133202         | ,000             | ,000  | ,000  |
|                                             | 403133203         | ,000             | ,000  | ,000  |
|                                             | 403133204         | 1,000            | ,000  | ,000  |
|                                             | 403133315         | ,000             | 1,000 | ,000  |
|                                             | 403133322         | ,000             | ,000  | 1,000 |
|                                             | 403133401         | ,000             | ,000  | ,000  |
|                                             | 403133402         | ,000             | ,000  | ,000  |
|                                             | 403133550         | ,000             | ,000  | ,000  |
|                                             | 403133772         | ,000             | ,000  | ,000  |
|                                             | 403135803         | ,000             | ,000  | ,000  |
|                                             | 404060001         | ,000             | ,000  | ,000  |
|                                             | 404060002         | ,000             | ,000  | ,000  |
|                                             | 404310003         | ,000             | ,000  | ,000  |
|                                             | 404310004         | ,000             | ,000  | ,000  |
|                                             | 502300005         | ,000             | ,000  | ,000  |
|                                             | 502300006         | ,000             | ,000  | ,000  |
|                                             | 502300007         | ,000             | ,000  | ,000  |
|                                             | 502300214         | ,000             | ,000  | ,000  |
|                                             | 502300411         | ,000             | ,000  | ,000  |
|                                             | 502300415         | ,000             | ,000  | ,000  |
|                                             | 502300416         | ,000             | ,000  | ,000  |
|                                             | 502300811         | ,000             | ,000  | ,000  |
|                                             | 502300913         | ,000             | ,000  | ,000  |
| bv2 belastning vs paoncil halva intervallet | 1 medelbelastning |                  |       |       |
|                                             | 2 underbelastning |                  |       |       |
|                                             | 3 överbelastning  |                  |       |       |

## Categorical Variables Codings

|                                             |                   | Parameter coding |       |       |
|---------------------------------------------|-------------------|------------------|-------|-------|
|                                             |                   | (18)             | (19)  | (20)  |
| VASTY2 (SAIR*10000)+VASTY                   | 403073101         | ,000             | ,000  | ,000  |
|                                             | 403073102         | ,000             | ,000  | ,000  |
|                                             | 403073103         | ,000             | ,000  | ,000  |
|                                             | 403073202         | ,000             | ,000  | ,000  |
|                                             | 403073203         | ,000             | ,000  | ,000  |
|                                             | 403073204         | ,000             | ,000  | ,000  |
|                                             | 403073303         | ,000             | ,000  | ,000  |
|                                             | 403073651         | ,000             | ,000  | ,000  |
|                                             | 403073771         | ,000             | ,000  | ,000  |
|                                             | 403133102         | ,000             | ,000  | ,000  |
|                                             | 403133106         | ,000             | ,000  | ,000  |
|                                             | 403133107         | ,000             | ,000  | ,000  |
|                                             | 403133109         | ,000             | ,000  | ,000  |
|                                             | 403133202         | ,000             | ,000  | ,000  |
|                                             | 403133203         | ,000             | ,000  | ,000  |
|                                             | 403133204         | ,000             | ,000  | ,000  |
|                                             | 403133315         | ,000             | ,000  | ,000  |
|                                             | 403133322         | ,000             | ,000  | ,000  |
|                                             | 403133401         | 1,000            | ,000  | ,000  |
|                                             | 403133402         | ,000             | 1,000 | ,000  |
|                                             | 403133550         | ,000             | ,000  | 1,000 |
|                                             | 403133772         | ,000             | ,000  | ,000  |
|                                             | 403135803         | ,000             | ,000  | ,000  |
|                                             | 404060001         | ,000             | ,000  | ,000  |
|                                             | 404060002         | ,000             | ,000  | ,000  |
|                                             | 404310003         | ,000             | ,000  | ,000  |
|                                             | 404310004         | ,000             | ,000  | ,000  |
|                                             | 502300005         | ,000             | ,000  | ,000  |
|                                             | 502300006         | ,000             | ,000  | ,000  |
|                                             | 502300007         | ,000             | ,000  | ,000  |
|                                             | 502300214         | ,000             | ,000  | ,000  |
|                                             | 502300411         | ,000             | ,000  | ,000  |
|                                             | 502300415         | ,000             | ,000  | ,000  |
|                                             | 502300416         | ,000             | ,000  | ,000  |
|                                             | 502300811         | ,000             | ,000  | ,000  |
|                                             | 502300913         | ,000             | ,000  | ,000  |
| bv2 belastning vs paoncil halva intervallet | 1 medelbelastning |                  |       |       |
|                                             | 2 underbelastning |                  |       |       |
|                                             | 3 överbelastning  |                  |       |       |

## Categorical Variables Codings

|                                             |                   | Parameter coding |       |       |
|---------------------------------------------|-------------------|------------------|-------|-------|
|                                             |                   | (21)             | (22)  | (23)  |
| VASTY2 (SAIR*10000)+VASTY                   | 403073101         | ,000             | ,000  | ,000  |
|                                             | 403073102         | ,000             | ,000  | ,000  |
|                                             | 403073103         | ,000             | ,000  | ,000  |
|                                             | 403073202         | ,000             | ,000  | ,000  |
|                                             | 403073203         | ,000             | ,000  | ,000  |
|                                             | 403073204         | ,000             | ,000  | ,000  |
|                                             | 403073303         | ,000             | ,000  | ,000  |
|                                             | 403073651         | ,000             | ,000  | ,000  |
|                                             | 403073771         | ,000             | ,000  | ,000  |
|                                             | 403133102         | ,000             | ,000  | ,000  |
|                                             | 403133106         | ,000             | ,000  | ,000  |
|                                             | 403133107         | ,000             | ,000  | ,000  |
|                                             | 403133109         | ,000             | ,000  | ,000  |
|                                             | 403133202         | ,000             | ,000  | ,000  |
|                                             | 403133203         | ,000             | ,000  | ,000  |
|                                             | 403133204         | ,000             | ,000  | ,000  |
|                                             | 403133315         | ,000             | ,000  | ,000  |
|                                             | 403133322         | ,000             | ,000  | ,000  |
|                                             | 403133401         | ,000             | ,000  | ,000  |
|                                             | 403133402         | ,000             | ,000  | ,000  |
|                                             | 403133550         | ,000             | ,000  | ,000  |
|                                             | 403133772         | 1,000            | ,000  | ,000  |
|                                             | 403135803         | ,000             | 1,000 | ,000  |
|                                             | 404060001         | ,000             | ,000  | 1,000 |
|                                             | 404060002         | ,000             | ,000  | ,000  |
|                                             | 404310003         | ,000             | ,000  | ,000  |
|                                             | 404310004         | ,000             | ,000  | ,000  |
|                                             | 502300005         | ,000             | ,000  | ,000  |
|                                             | 502300006         | ,000             | ,000  | ,000  |
|                                             | 502300007         | ,000             | ,000  | ,000  |
|                                             | 502300214         | ,000             | ,000  | ,000  |
|                                             | 502300411         | ,000             | ,000  | ,000  |
|                                             | 502300415         | ,000             | ,000  | ,000  |
|                                             | 502300416         | ,000             | ,000  | ,000  |
|                                             | 502300811         | ,000             | ,000  | ,000  |
|                                             | 502300913         | ,000             | ,000  | ,000  |
| bv2 belastning vs paoncil halva intervallet | 1 medelbelastning |                  |       |       |
|                                             | 2 underbelastning |                  |       |       |
|                                             | 3 överbelastning  |                  |       |       |

## Categorical Variables Codings

|                                             |                   | Parameter coding |       |       |
|---------------------------------------------|-------------------|------------------|-------|-------|
|                                             |                   | (24)             | (25)  | (26)  |
| VASTY2 (SAIR*10000)+VASTY                   | 403073101         | ,000             | ,000  | ,000  |
|                                             | 403073102         | ,000             | ,000  | ,000  |
|                                             | 403073103         | ,000             | ,000  | ,000  |
|                                             | 403073202         | ,000             | ,000  | ,000  |
|                                             | 403073203         | ,000             | ,000  | ,000  |
|                                             | 403073204         | ,000             | ,000  | ,000  |
|                                             | 403073303         | ,000             | ,000  | ,000  |
|                                             | 403073651         | ,000             | ,000  | ,000  |
|                                             | 403073771         | ,000             | ,000  | ,000  |
|                                             | 403133102         | ,000             | ,000  | ,000  |
|                                             | 403133106         | ,000             | ,000  | ,000  |
|                                             | 403133107         | ,000             | ,000  | ,000  |
|                                             | 403133109         | ,000             | ,000  | ,000  |
|                                             | 403133202         | ,000             | ,000  | ,000  |
|                                             | 403133203         | ,000             | ,000  | ,000  |
|                                             | 403133204         | ,000             | ,000  | ,000  |
|                                             | 403133315         | ,000             | ,000  | ,000  |
|                                             | 403133322         | ,000             | ,000  | ,000  |
|                                             | 403133401         | ,000             | ,000  | ,000  |
|                                             | 403133402         | ,000             | ,000  | ,000  |
|                                             | 403133550         | ,000             | ,000  | ,000  |
|                                             | 403133772         | ,000             | ,000  | ,000  |
|                                             | 403135803         | ,000             | ,000  | ,000  |
|                                             | 404060001         | ,000             | ,000  | ,000  |
|                                             | 404060002         | 1,000            | ,000  | ,000  |
|                                             | 404310003         | ,000             | 1,000 | ,000  |
|                                             | 404310004         | ,000             | ,000  | 1,000 |
|                                             | 502300005         | ,000             | ,000  | ,000  |
|                                             | 502300006         | ,000             | ,000  | ,000  |
|                                             | 502300007         | ,000             | ,000  | ,000  |
|                                             | 502300214         | ,000             | ,000  | ,000  |
|                                             | 502300411         | ,000             | ,000  | ,000  |
|                                             | 502300415         | ,000             | ,000  | ,000  |
|                                             | 502300416         | ,000             | ,000  | ,000  |
|                                             | 502300811         | ,000             | ,000  | ,000  |
|                                             | 502300913         | ,000             | ,000  | ,000  |
| bv2 belastning vs paencil halva intervallet | 1 medelbelastning |                  |       |       |
|                                             | 2 underbelastning |                  |       |       |
|                                             | 3 överbelastning  |                  |       |       |



## Categorical Variables Codings

|                                             |                   | Parameter coding |       |       |
|---------------------------------------------|-------------------|------------------|-------|-------|
|                                             |                   | (27)             | (28)  | (29)  |
| VASTY2 (SAIR*10000)+VASTY                   | 403073101         | ,000             | ,000  | ,000  |
|                                             | 403073102         | ,000             | ,000  | ,000  |
|                                             | 403073103         | ,000             | ,000  | ,000  |
|                                             | 403073202         | ,000             | ,000  | ,000  |
|                                             | 403073203         | ,000             | ,000  | ,000  |
|                                             | 403073204         | ,000             | ,000  | ,000  |
|                                             | 403073303         | ,000             | ,000  | ,000  |
|                                             | 403073651         | ,000             | ,000  | ,000  |
|                                             | 403073771         | ,000             | ,000  | ,000  |
|                                             | 403133102         | ,000             | ,000  | ,000  |
|                                             | 403133106         | ,000             | ,000  | ,000  |
|                                             | 403133107         | ,000             | ,000  | ,000  |
|                                             | 403133109         | ,000             | ,000  | ,000  |
|                                             | 403133202         | ,000             | ,000  | ,000  |
|                                             | 403133203         | ,000             | ,000  | ,000  |
|                                             | 403133204         | ,000             | ,000  | ,000  |
|                                             | 403133315         | ,000             | ,000  | ,000  |
|                                             | 403133322         | ,000             | ,000  | ,000  |
|                                             | 403133401         | ,000             | ,000  | ,000  |
|                                             | 403133402         | ,000             | ,000  | ,000  |
|                                             | 403133550         | ,000             | ,000  | ,000  |
|                                             | 403133772         | ,000             | ,000  | ,000  |
|                                             | 403135803         | ,000             | ,000  | ,000  |
|                                             | 404060001         | ,000             | ,000  | ,000  |
|                                             | 404060002         | ,000             | ,000  | ,000  |
|                                             | 404310003         | ,000             | ,000  | ,000  |
|                                             | 404310004         | ,000             | ,000  | ,000  |
|                                             | 502300005         | 1,000            | ,000  | ,000  |
|                                             | 502300006         | ,000             | 1,000 | ,000  |
|                                             | 502300007         | ,000             | ,000  | 1,000 |
|                                             | 502300214         | ,000             | ,000  | ,000  |
|                                             | 502300411         | ,000             | ,000  | ,000  |
|                                             | 502300415         | ,000             | ,000  | ,000  |
|                                             | 502300416         | ,000             | ,000  | ,000  |
|                                             | 502300811         | ,000             | ,000  | ,000  |
|                                             | 502300913         | ,000             | ,000  | ,000  |
| bv2 belastning vs paencil halva intervallet | 1 medelbelastning |                  |       |       |
|                                             | 2 underbelastning |                  |       |       |
|                                             | 3 överbelastning  |                  |       |       |

## Categorical Variables Codings

|                                             |                   | Parameter coding |       |       |
|---------------------------------------------|-------------------|------------------|-------|-------|
|                                             |                   | (30)             | (31)  | (32)  |
| VASTY2 (SAIR*10000)+VASTY                   | 403073101         | ,000             | ,000  | ,000  |
|                                             | 403073102         | ,000             | ,000  | ,000  |
|                                             | 403073103         | ,000             | ,000  | ,000  |
|                                             | 403073202         | ,000             | ,000  | ,000  |
|                                             | 403073203         | ,000             | ,000  | ,000  |
|                                             | 403073204         | ,000             | ,000  | ,000  |
|                                             | 403073303         | ,000             | ,000  | ,000  |
|                                             | 403073651         | ,000             | ,000  | ,000  |
|                                             | 403073771         | ,000             | ,000  | ,000  |
|                                             | 403133102         | ,000             | ,000  | ,000  |
|                                             | 403133106         | ,000             | ,000  | ,000  |
|                                             | 403133107         | ,000             | ,000  | ,000  |
|                                             | 403133109         | ,000             | ,000  | ,000  |
|                                             | 403133202         | ,000             | ,000  | ,000  |
|                                             | 403133203         | ,000             | ,000  | ,000  |
|                                             | 403133204         | ,000             | ,000  | ,000  |
|                                             | 403133315         | ,000             | ,000  | ,000  |
|                                             | 403133322         | ,000             | ,000  | ,000  |
|                                             | 403133401         | ,000             | ,000  | ,000  |
|                                             | 403133402         | ,000             | ,000  | ,000  |
|                                             | 403133550         | ,000             | ,000  | ,000  |
|                                             | 403133772         | ,000             | ,000  | ,000  |
|                                             | 403135803         | ,000             | ,000  | ,000  |
|                                             | 404060001         | ,000             | ,000  | ,000  |
|                                             | 404060002         | ,000             | ,000  | ,000  |
|                                             | 404310003         | ,000             | ,000  | ,000  |
|                                             | 404310004         | ,000             | ,000  | ,000  |
|                                             | 502300005         | ,000             | ,000  | ,000  |
|                                             | 502300006         | ,000             | ,000  | ,000  |
|                                             | 502300007         | ,000             | ,000  | ,000  |
|                                             | 502300214         | 1,000            | ,000  | ,000  |
|                                             | 502300411         | ,000             | 1,000 | ,000  |
|                                             | 502300415         | ,000             | ,000  | 1,000 |
|                                             | 502300416         | ,000             | ,000  | ,000  |
|                                             | 502300811         | ,000             | ,000  | ,000  |
|                                             | 502300913         | ,000             | ,000  | ,000  |
| bv2 belastning vs paoncil halva intervallet | 1 medelbelastning |                  |       |       |
|                                             | 2 underbelastning |                  |       |       |
|                                             | 3 överbelastning  |                  |       |       |

## Categorical Variables Codings

|                                             |                   | Parameter coding |       |       |
|---------------------------------------------|-------------------|------------------|-------|-------|
|                                             |                   | (33)             | (34)  | (35)  |
| VASTY2 (SAIR*10000)+VASTY                   | 403073101         | ,000             | ,000  | ,000  |
|                                             | 403073102         | ,000             | ,000  | ,000  |
|                                             | 403073103         | ,000             | ,000  | ,000  |
|                                             | 403073202         | ,000             | ,000  | ,000  |
|                                             | 403073203         | ,000             | ,000  | ,000  |
|                                             | 403073204         | ,000             | ,000  | ,000  |
|                                             | 403073303         | ,000             | ,000  | ,000  |
|                                             | 403073651         | ,000             | ,000  | ,000  |
|                                             | 403073771         | ,000             | ,000  | ,000  |
|                                             | 403133102         | ,000             | ,000  | ,000  |
|                                             | 403133106         | ,000             | ,000  | ,000  |
|                                             | 403133107         | ,000             | ,000  | ,000  |
|                                             | 403133109         | ,000             | ,000  | ,000  |
|                                             | 403133202         | ,000             | ,000  | ,000  |
|                                             | 403133203         | ,000             | ,000  | ,000  |
|                                             | 403133204         | ,000             | ,000  | ,000  |
|                                             | 403133315         | ,000             | ,000  | ,000  |
|                                             | 403133322         | ,000             | ,000  | ,000  |
|                                             | 403133401         | ,000             | ,000  | ,000  |
|                                             | 403133402         | ,000             | ,000  | ,000  |
|                                             | 403133550         | ,000             | ,000  | ,000  |
|                                             | 403133772         | ,000             | ,000  | ,000  |
|                                             | 403135803         | ,000             | ,000  | ,000  |
|                                             | 404060001         | ,000             | ,000  | ,000  |
|                                             | 404060002         | ,000             | ,000  | ,000  |
|                                             | 404310003         | ,000             | ,000  | ,000  |
|                                             | 404310004         | ,000             | ,000  | ,000  |
|                                             | 502300005         | ,000             | ,000  | ,000  |
|                                             | 502300006         | ,000             | ,000  | ,000  |
|                                             | 502300007         | ,000             | ,000  | ,000  |
|                                             | 502300214         | ,000             | ,000  | ,000  |
|                                             | 502300411         | ,000             | ,000  | ,000  |
|                                             | 502300415         | ,000             | ,000  | ,000  |
|                                             | 502300416         | 1,000            | ,000  | ,000  |
|                                             | 502300811         | ,000             | 1,000 | ,000  |
|                                             | 502300913         | ,000             | ,000  | 1,000 |
| bv2 belastning vs paoncil halva intervallet | 1 medelbelastning |                  |       |       |
|                                             | 2 underbelastning |                  |       |       |
|                                             | 3 överbelastning  |                  |       |       |

**Block 0: Beginning Block**

Classification Table<sup>a,b</sup>

| Observed           |                              |                     | Predicted        |                     |
|--------------------|------------------------------|---------------------|------------------|---------------------|
|                    |                              |                     | 0 ingen hændelse | 1 minst en hændelse |
| Step 0             | hand01 hændelse nej eller ja | 0 ingen hændelse    | 11108            | 0                   |
|                    |                              | 1 minst en hændelse | 1367             | 0                   |
| Overall Percentage |                              |                     |                  |                     |

Classification Table<sup>a,b</sup>

| Observed           |                              |                     | Predicted          |
|--------------------|------------------------------|---------------------|--------------------|
|                    |                              |                     | Percentage Correct |
| Step 0             | hand01 hændelse nej eller ja | 0 ingen hændelse    | 100,0              |
|                    |                              | 1 minst en hændelse | ,0                 |
| Overall Percentage |                              |                     | 89,0               |

a. Constant is included in the model.

b. The cut value is ,500

Variables in the Equation

|                 | B      | S.E. | Wald     | df | Sig. | Exp(B) |
|-----------------|--------|------|----------|----|------|--------|
| Step 0 Constant | -2,095 | ,029 | 5342,584 | 1  | ,000 | ,123   |

## Variables not in the Equation

|        |                    | Score   | df | Sig. |
|--------|--------------------|---------|----|------|
| Step 0 | Variables          |         |    |      |
|        | bv2                | 50,191  | 2  | ,000 |
|        | bv2(1)             | 44,434  | 1  | ,000 |
|        | bv2(2)             | 36,942  | 1  | ,000 |
|        | VASTY2             | 541,214 | 35 | ,000 |
|        | VASTY2(1)          | 1,169   | 1  | ,280 |
|        | VASTY2(2)          | 87,511  | 1  | ,000 |
|        | VASTY2(3)          | 13,995  | 1  | ,000 |
|        | VASTY2(4)          | ,464    | 1  | ,496 |
|        | VASTY2(5)          | 5,526   | 1  | ,019 |
|        | VASTY2(6)          | 19,435  | 1  | ,000 |
|        | VASTY2(7)          | 86,074  | 1  | ,000 |
|        | VASTY2(8)          | 1,043   | 1  | ,307 |
|        | VASTY2(9)          | ,408    | 1  | ,523 |
|        | VASTY2(10)         | 58,583  | 1  | ,000 |
|        | VASTY2(11)         | 33,445  | 1  | ,000 |
|        | VASTY2(12)         | ,029    | 1  | ,865 |
|        | VASTY2(13)         | 33,445  | 1  | ,000 |
|        | VASTY2(14)         | 4,163   | 1  | ,041 |
|        | VASTY2(15)         | ,464    | 1  | ,496 |
|        | VASTY2(16)         | ,763    | 1  | ,382 |
|        | VASTY2(17)         | 24,320  | 1  | ,000 |
|        | VASTY2(18)         | 17,742  | 1  | ,000 |
|        | VASTY2(19)         | 27,791  | 1  | ,000 |
|        | VASTY2(20)         | ,015    | 1  | ,902 |
|        | VASTY2(21)         | 2,890   | 1  | ,089 |
|        | VASTY2(22)         | ,462    | 1  | ,497 |
|        | VASTY2(23)         | 15,306  | 1  | ,000 |
|        | VASTY2(24)         | 12,594  | 1  | ,000 |
|        | VASTY2(25)         | ,128    | 1  | ,720 |
|        | VASTY2(26)         | 12,864  | 1  | ,000 |
|        | VASTY2(27)         | 24,439  | 1  | ,000 |
|        | VASTY2(28)         | 9,963   | 1  | ,002 |
|        | VASTY2(29)         | 18,184  | 1  | ,000 |
|        | VASTY2(30)         | ,486    | 1  | ,486 |
|        | VASTY2(31)         | 6,400   | 1  | ,011 |
|        | VASTY2(32)         | 1,626   | 1  | ,202 |
|        | VASTY2(33)         | 1,336   | 1  | ,248 |
|        | VASTY2(34)         | 29,489  | 1  | ,000 |
|        | VASTY2(35)         | 3,668   | 1  | ,055 |
|        | Overall Statistics | 562,670 | 37 | ,000 |

**Block 1: Method = Enter**

**Omnibus Tests of Model Coefficients**

|        |       | Chi-square | df | Sig. |
|--------|-------|------------|----|------|
| Step 1 | Step  | 561,168    | 37 | ,000 |
|        | Block | 561,168    | 37 | ,000 |
|        | Model | 561,168    | 37 | ,000 |

**Model Summary**

| Step | -2 Log likelihood     | Cox & Snell R Square | Nagelkerke R Square |
|------|-----------------------|----------------------|---------------------|
| 1    | 8062,415 <sup>a</sup> | ,044                 | ,088                |

a. Estimation terminated at iteration number 6 because parameter estimates changed by less than ,001.

**Classification Table<sup>a</sup>**

|                    |                              | Predicted                    |                     |
|--------------------|------------------------------|------------------------------|---------------------|
|                    |                              | hand01 händelse nej eller ja |                     |
| Observed           |                              | 0 ingen händelse             | 1 minst en händelse |
| Step 1             | hand01 händelse nej eller ja | 11108                        | 0                   |
|                    |                              | 1367                         | 0                   |
| Overall Percentage |                              |                              |                     |

**Classification Table<sup>a</sup>**

|                    |                              | Predicted          |
|--------------------|------------------------------|--------------------|
|                    |                              | Percentage Correct |
| Observed           |                              |                    |
| Step 1             | hand01 händelse nej eller ja | 100,0              |
|                    |                              | ,0                 |
| Overall Percentage |                              | 89,0               |

a. The cut value is ,500

## Variables in the Equation

|                         | B      | S.E. | Wald    | df | Sig. | Exp(B) |
|-------------------------|--------|------|---------|----|------|--------|
| Step 1 <sup>a</sup> bv2 |        |      | 22,320  | 2  | ,000 |        |
| bv2(1)                  | -,194  | ,084 | 5,283   | 1  | ,022 | ,824   |
| bv2(2)                  | ,157   | ,077 | 4,191   | 1  | ,041 | 1,170  |
| VASTY2                  |        |      | 433,569 | 35 | ,000 |        |
| VASTY2(1)               | ,327   | ,240 | 1,865   | 1  | ,172 | 1,387  |
| VASTY2(2)               | 1,187  | ,216 | 30,073  | 1  | ,000 | 3,277  |
| VASTY2(3)               | -,816  | ,303 | 7,252   | 1  | ,007 | ,442   |
| VASTY2(4)               | ,181   | ,243 | ,557    | 1  | ,455 | 1,199  |
| VASTY2(5)               | -,372  | ,282 | 1,741   | 1  | ,187 | ,689   |
| VASTY2(6)               | -1,022 | ,327 | 9,750   | 1  | ,002 | ,360   |
| VASTY2(7)               | 1,088  | ,219 | 24,651  | 1  | ,000 | 2,967  |
| VASTY2(8)               | ,259   | ,240 | 1,162   | 1  | ,281 | 1,296  |
| VASTY2(9)               | ,201   | ,246 | ,664    | 1  | ,415 | 1,222  |
| VASTY2(10)              | 1,018  | ,219 | 21,559  | 1  | ,000 | 2,767  |
| VASTY2(11)              | ,882   | ,223 | 15,690  | 1  | ,000 | 2,415  |
| VASTY2(12)              | ,084   | ,248 | ,115    | 1  | ,735 | 1,088  |
| VASTY2(13)              | ,771   | ,224 | 11,820  | 1  | ,001 | 2,162  |
| VASTY2(14)              | -,289  | ,268 | 1,166   | 1  | ,280 | ,749   |
| VASTY2(15)              | ,226   | ,242 | ,874    | 1  | ,350 | 1,254  |
| VASTY2(16)              | ,353   | ,288 | 1,507   | 1  | ,220 | 1,424  |
| VASTY2(17)              | -1,172 | ,356 | 10,874  | 1  | ,001 | ,310   |
| VASTY2(18)              | -,876  | ,320 | 7,506   | 1  | ,006 | ,416   |
| VASTY2(19)              | -1,252 | ,385 | 10,579  | 1  | ,001 | ,286   |
| VASTY2(20)              | ,088   | ,261 | ,114    | 1  | ,736 | 1,092  |
| VASTY2(21)              | -,179  | ,263 | ,464    | 1  | ,496 | ,836   |
| VASTY2(22)              | ,156   | ,253 | ,383    | 1  | ,536 | 1,169  |
| VASTY2(23)              | ,723   | ,227 | 10,093  | 1  | ,001 | 2,060  |
| VASTY2(24)              | ,564   | ,230 | 6,034   | 1  | ,014 | 1,758  |
| VASTY2(25)              | ,128   | ,264 | ,234    | 1  | ,628 | 1,136  |
| VASTY2(26)              | -,852  | ,337 | 6,410   | 1  | ,011 | ,426   |
| VASTY2(27)              | -1,284 | ,356 | 13,006  | 1  | ,000 | ,277   |
| VASTY2(28)              | -,907  | ,371 | 5,970   | 1  | ,015 | ,404   |
| VASTY2(29)              | -,923  | ,320 | 8,342   | 1  | ,004 | ,397   |
| VASTY2(30)              | ,019   | ,252 | ,005    | 1  | ,941 | 1,019  |
| VASTY2(31)              | ,527   | ,233 | 5,125   | 1  | ,024 | 1,694  |
| VASTY2(32)              | -,025  | ,259 | ,010    | 1  | ,922 | ,975   |
| VASTY2(33)              | -,014  | ,257 | ,003    | 1  | ,957 | ,986   |
| VASTY2(34)              | -1,546 | ,401 | 14,904  | 1  | ,000 | ,213   |
| VASTY2(35)              | ,390   | ,243 | 2,571   | 1  | ,109 | 1,477  |
| Constant                | -2,238 | ,187 | 143,934 | 1  | ,000 | ,107   |

## Variables in the Equation

|                     |            | 95% C.I. for EXP(B) |       |
|---------------------|------------|---------------------|-------|
|                     |            | Lower               | Upper |
| Step 1 <sup>a</sup> | bv2        |                     |       |
|                     | bv2(1)     | ,698                | ,972  |
|                     | bv2(2)     | 1,007               | 1,360 |
|                     | VASTY2     |                     |       |
|                     | VASTY2(1)  | ,867                | 2,220 |
|                     | VASTY2(2)  | 2,144               | 5,009 |
|                     | VASTY2(3)  | ,244                | ,801  |
|                     | VASTY2(4)  | ,745                | 1,929 |
|                     | VASTY2(5)  | ,397                | 1,198 |
|                     | VASTY2(6)  | ,189                | ,683  |
|                     | VASTY2(7)  | 1,932               | 4,559 |
|                     | VASTY2(8)  | ,809                | 2,075 |
|                     | VASTY2(9)  | ,754                | 1,980 |
|                     | VASTY2(10) | 1,801               | 4,252 |
|                     | VASTY2(11) | 1,561               | 3,736 |
|                     | VASTY2(12) | ,669                | 1,768 |
|                     | VASTY2(13) | 1,393               | 3,355 |
|                     | VASTY2(14) | ,443                | 1,265 |
|                     | VASTY2(15) | ,780                | 2,015 |
|                     | VASTY2(16) | ,810                | 2,502 |
|                     | VASTY2(17) | ,154                | ,622  |
|                     | VASTY2(18) | ,223                | ,779  |
|                     | VASTY2(19) | ,135                | ,608  |
|                     | VASTY2(20) | ,655                | 1,820 |
|                     | VASTY2(21) | ,500                | 1,399 |
|                     | VASTY2(22) | ,713                | 1,918 |
|                     | VASTY2(23) | 1,319               | 3,218 |
|                     | VASTY2(24) | 1,121               | 2,758 |
|                     | VASTY2(25) | ,677                | 1,907 |
|                     | VASTY2(26) | ,220                | ,825  |
|                     | VASTY2(27) | ,138                | ,556  |
|                     | VASTY2(28) | ,195                | ,836  |
|                     | VASTY2(29) | ,212                | ,743  |
|                     | VASTY2(30) | ,622                | 1,669 |
|                     | VASTY2(31) | 1,073               | 2,674 |
|                     | VASTY2(32) | ,587                | 1,620 |
|                     | VASTY2(33) | ,596                | 1,632 |
|                     | VASTY2(34) | ,097                | ,467  |
|                     | VASTY2(35) | ,917                | 2,379 |
|                     | Constant   |                     |       |

a. Variable(s) entered on step 1: bv2, VASTY2.



```

1
2
3 LOGISTIC REGRESSION VARIABLES hand01
4   /METHOD=ENTER bv3 VASTY2
5   /CONTRAST (bv3)=Indicator(1)
6   /CONTRAST (VASTY2)=Indicator(1)
7   /PRINT=CI(95)
8   /CRITERIA=PIN(0.05) POUT(0.10) ITERATE(20) CUT(0.5).
9

```

## Logistic Regression

[DataSet6] C:\cWordjan\Rafaela\_VCS\alla\_tillsammans\abo\_bjo\_vasa\_v1.sav

### Case Processing Summary

| Unweighted Cases <sup>a</sup> |                      | N     | Percent |
|-------------------------------|----------------------|-------|---------|
| Selected Cases                | Included in Analysis | 12475 | 100,0   |
|                               | Missing Cases        | 0     | ,0      |
|                               | Total                | 12475 | 100,0   |
| Unselected Cases              |                      | 0     | ,0      |
| Total                         |                      | 12475 | 100,0   |

a. If weight is in effect, see classification table for the total number of cases.

### Dependent Variable Encoding

| Original Value      | Internal Value |
|---------------------|----------------|
| 0 ingen händelse    | 0              |
| 1 minst en händelse | 1              |

## Categorical Variables Codings

|                                              |                   | Frequency | Parameter coding |       |
|----------------------------------------------|-------------------|-----------|------------------|-------|
|                                              |                   |           | (1)              | (2)   |
| VASTY2 (SAIR*10000)+VASTY                    | 403073101         | 365       | ,000             | ,000  |
|                                              | 403073102         | 362       | 1,000            | ,000  |
|                                              | 403073103         | 365       | ,000             | 1,000 |
|                                              | 403073202         | 365       | ,000             | ,000  |
|                                              | 403073203         | 365       | ,000             | ,000  |
|                                              | 403073204         | 330       | ,000             | ,000  |
|                                              | 403073303         | 364       | ,000             | ,000  |
|                                              | 403073651         | 362       | ,000             | ,000  |
|                                              | 403073771         | 365       | ,000             | ,000  |
|                                              | 403133102         | 341       | ,000             | ,000  |
|                                              | 403133106         | 365       | ,000             | ,000  |
|                                              | 403133107         | 365       | ,000             | ,000  |
|                                              | 403133109         | 365       | ,000             | ,000  |
|                                              | 403133202         | 365       | ,000             | ,000  |
|                                              | 403133203         | 365       | ,000             | ,000  |
|                                              | 403133204         | 365       | ,000             | ,000  |
|                                              | 403133315         | 177       | ,000             | ,000  |
|                                              | 403133322         | 365       | ,000             | ,000  |
|                                              | 403133401         | 362       | ,000             | ,000  |
|                                              | 403133402         | 365       | ,000             | ,000  |
|                                              | 403133550         | 298       | ,000             | ,000  |
|                                              | 403133772         | 365       | ,000             | ,000  |
|                                              | 403135803         | 365       | ,000             | ,000  |
|                                              | 404060001         | 365       | ,000             | ,000  |
|                                              | 404060002         | 366       | ,000             | ,000  |
|                                              | 404310003         | 291       | ,000             | ,000  |
|                                              | 404310004         | 291       | ,000             | ,000  |
|                                              | 502300005         | 366       | ,000             | ,000  |
|                                              | 502300006         | 225       | ,000             | ,000  |
|                                              | 502300007         | 366       | ,000             | ,000  |
|                                              | 502300214         | 366       | ,000             | ,000  |
|                                              | 502300411         | 366       | ,000             | ,000  |
|                                              | 502300415         | 360       | ,000             | ,000  |
|                                              | 502300416         | 363       | ,000             | ,000  |
|                                              | 502300811         | 364       | ,000             | ,000  |
|                                              | 502300913         | 315       | ,000             | ,000  |
| bv3 belasnting vs paoncil dubbla intervallet | 1 medelbelastning | 9121      | ,000             | ,000  |
|                                              | 2 underbelastning | 1505      | 1,000            | ,000  |
|                                              | 3 överbelastning  | 1849      | ,000             | 1,000 |

## Categorical Variables Codings

|                                              |                   | Parameter coding |       |       |
|----------------------------------------------|-------------------|------------------|-------|-------|
|                                              |                   | (3)              | (4)   | (5)   |
| VASTY2 (SAIR*10000)+VASTY                    | 403073101         | ,000             | ,000  | ,000  |
|                                              | 403073102         | ,000             | ,000  | ,000  |
|                                              | 403073103         | ,000             | ,000  | ,000  |
|                                              | 403073202         | 1,000            | ,000  | ,000  |
|                                              | 403073203         | ,000             | 1,000 | ,000  |
|                                              | 403073204         | ,000             | ,000  | 1,000 |
|                                              | 403073303         | ,000             | ,000  | ,000  |
|                                              | 403073651         | ,000             | ,000  | ,000  |
|                                              | 403073771         | ,000             | ,000  | ,000  |
|                                              | 403133102         | ,000             | ,000  | ,000  |
|                                              | 403133106         | ,000             | ,000  | ,000  |
|                                              | 403133107         | ,000             | ,000  | ,000  |
|                                              | 403133109         | ,000             | ,000  | ,000  |
|                                              | 403133202         | ,000             | ,000  | ,000  |
|                                              | 403133203         | ,000             | ,000  | ,000  |
|                                              | 403133204         | ,000             | ,000  | ,000  |
|                                              | 403133315         | ,000             | ,000  | ,000  |
|                                              | 403133322         | ,000             | ,000  | ,000  |
|                                              | 403133401         | ,000             | ,000  | ,000  |
|                                              | 403133402         | ,000             | ,000  | ,000  |
|                                              | 403133550         | ,000             | ,000  | ,000  |
|                                              | 403133772         | ,000             | ,000  | ,000  |
|                                              | 403135803         | ,000             | ,000  | ,000  |
|                                              | 404060001         | ,000             | ,000  | ,000  |
|                                              | 404060002         | ,000             | ,000  | ,000  |
|                                              | 404310003         | ,000             | ,000  | ,000  |
|                                              | 404310004         | ,000             | ,000  | ,000  |
|                                              | 502300005         | ,000             | ,000  | ,000  |
|                                              | 502300006         | ,000             | ,000  | ,000  |
|                                              | 502300007         | ,000             | ,000  | ,000  |
|                                              | 502300214         | ,000             | ,000  | ,000  |
|                                              | 502300411         | ,000             | ,000  | ,000  |
|                                              | 502300415         | ,000             | ,000  | ,000  |
|                                              | 502300416         | ,000             | ,000  | ,000  |
|                                              | 502300811         | ,000             | ,000  | ,000  |
|                                              | 502300913         | ,000             | ,000  | ,000  |
| bv3 belasnting vs paoncil dubbla intervallet | 1 medelbelastning |                  |       |       |
|                                              | 2 underbelastning |                  |       |       |
|                                              | 3 överbelastning  |                  |       |       |

## Categorical Variables Codings

|                                              |                   | Parameter coding |       |       |
|----------------------------------------------|-------------------|------------------|-------|-------|
|                                              |                   | (6)              | (7)   | (8)   |
| VASTY2 (SAIR*10000)+VASTY                    | 403073101         | ,000             | ,000  | ,000  |
|                                              | 403073102         | ,000             | ,000  | ,000  |
|                                              | 403073103         | ,000             | ,000  | ,000  |
|                                              | 403073202         | ,000             | ,000  | ,000  |
|                                              | 403073203         | ,000             | ,000  | ,000  |
|                                              | 403073204         | ,000             | ,000  | ,000  |
|                                              | 403073303         | 1,000            | ,000  | ,000  |
|                                              | 403073651         | ,000             | 1,000 | ,000  |
|                                              | 403073771         | ,000             | ,000  | 1,000 |
|                                              | 403133102         | ,000             | ,000  | ,000  |
|                                              | 403133106         | ,000             | ,000  | ,000  |
|                                              | 403133107         | ,000             | ,000  | ,000  |
|                                              | 403133109         | ,000             | ,000  | ,000  |
|                                              | 403133202         | ,000             | ,000  | ,000  |
|                                              | 403133203         | ,000             | ,000  | ,000  |
|                                              | 403133204         | ,000             | ,000  | ,000  |
|                                              | 403133315         | ,000             | ,000  | ,000  |
|                                              | 403133322         | ,000             | ,000  | ,000  |
|                                              | 403133401         | ,000             | ,000  | ,000  |
|                                              | 403133402         | ,000             | ,000  | ,000  |
|                                              | 403133550         | ,000             | ,000  | ,000  |
|                                              | 403133772         | ,000             | ,000  | ,000  |
|                                              | 403135803         | ,000             | ,000  | ,000  |
|                                              | 404060001         | ,000             | ,000  | ,000  |
|                                              | 404060002         | ,000             | ,000  | ,000  |
|                                              | 404310003         | ,000             | ,000  | ,000  |
|                                              | 404310004         | ,000             | ,000  | ,000  |
|                                              | 502300005         | ,000             | ,000  | ,000  |
|                                              | 502300006         | ,000             | ,000  | ,000  |
|                                              | 502300007         | ,000             | ,000  | ,000  |
|                                              | 502300214         | ,000             | ,000  | ,000  |
|                                              | 502300411         | ,000             | ,000  | ,000  |
|                                              | 502300415         | ,000             | ,000  | ,000  |
|                                              | 502300416         | ,000             | ,000  | ,000  |
|                                              | 502300811         | ,000             | ,000  | ,000  |
|                                              | 502300913         | ,000             | ,000  | ,000  |
| bv3 belasnting vs paoncil dubbla intervallet | 1 medelbelastning |                  |       |       |
|                                              | 2 underbelastning |                  |       |       |
|                                              | 3 överbelastning  |                  |       |       |

## Categorical Variables Codings

|                                              |                   | Parameter coding |       |       |
|----------------------------------------------|-------------------|------------------|-------|-------|
|                                              |                   | (9)              | (10)  | (11)  |
| VASTY2 (SAIR*10000)+VASTY                    | 403073101         | ,000             | ,000  | ,000  |
|                                              | 403073102         | ,000             | ,000  | ,000  |
|                                              | 403073103         | ,000             | ,000  | ,000  |
|                                              | 403073202         | ,000             | ,000  | ,000  |
|                                              | 403073203         | ,000             | ,000  | ,000  |
|                                              | 403073204         | ,000             | ,000  | ,000  |
|                                              | 403073303         | ,000             | ,000  | ,000  |
|                                              | 403073651         | ,000             | ,000  | ,000  |
|                                              | 403073771         | ,000             | ,000  | ,000  |
|                                              | 403133102         | 1,000            | ,000  | ,000  |
|                                              | 403133106         | ,000             | 1,000 | ,000  |
|                                              | 403133107         | ,000             | ,000  | 1,000 |
|                                              | 403133109         | ,000             | ,000  | ,000  |
|                                              | 403133202         | ,000             | ,000  | ,000  |
|                                              | 403133203         | ,000             | ,000  | ,000  |
|                                              | 403133204         | ,000             | ,000  | ,000  |
|                                              | 403133315         | ,000             | ,000  | ,000  |
|                                              | 403133322         | ,000             | ,000  | ,000  |
|                                              | 403133401         | ,000             | ,000  | ,000  |
|                                              | 403133402         | ,000             | ,000  | ,000  |
|                                              | 403133550         | ,000             | ,000  | ,000  |
|                                              | 403133772         | ,000             | ,000  | ,000  |
|                                              | 403135803         | ,000             | ,000  | ,000  |
|                                              | 404060001         | ,000             | ,000  | ,000  |
|                                              | 404060002         | ,000             | ,000  | ,000  |
|                                              | 404310003         | ,000             | ,000  | ,000  |
|                                              | 404310004         | ,000             | ,000  | ,000  |
|                                              | 502300005         | ,000             | ,000  | ,000  |
|                                              | 502300006         | ,000             | ,000  | ,000  |
|                                              | 502300007         | ,000             | ,000  | ,000  |
|                                              | 502300214         | ,000             | ,000  | ,000  |
|                                              | 502300411         | ,000             | ,000  | ,000  |
|                                              | 502300415         | ,000             | ,000  | ,000  |
|                                              | 502300416         | ,000             | ,000  | ,000  |
|                                              | 502300811         | ,000             | ,000  | ,000  |
|                                              | 502300913         | ,000             | ,000  | ,000  |
| bv3 belasnting vs paoncil dubbla intervallet | 1 medelbelastning |                  |       |       |
|                                              | 2 underbelastning |                  |       |       |
|                                              | 3 överbelastning  |                  |       |       |

## Categorical Variables Codings

|                                              |                   | Parameter coding |       |       |
|----------------------------------------------|-------------------|------------------|-------|-------|
|                                              |                   | (12)             | (13)  | (14)  |
| VASTY2 (SAIR*10000)+VASTY                    | 403073101         | ,000             | ,000  | ,000  |
|                                              | 403073102         | ,000             | ,000  | ,000  |
|                                              | 403073103         | ,000             | ,000  | ,000  |
|                                              | 403073202         | ,000             | ,000  | ,000  |
|                                              | 403073203         | ,000             | ,000  | ,000  |
|                                              | 403073204         | ,000             | ,000  | ,000  |
|                                              | 403073303         | ,000             | ,000  | ,000  |
|                                              | 403073651         | ,000             | ,000  | ,000  |
|                                              | 403073771         | ,000             | ,000  | ,000  |
|                                              | 403133102         | ,000             | ,000  | ,000  |
|                                              | 403133106         | ,000             | ,000  | ,000  |
|                                              | 403133107         | ,000             | ,000  | ,000  |
|                                              | 403133109         | 1,000            | ,000  | ,000  |
|                                              | 403133202         | ,000             | 1,000 | ,000  |
|                                              | 403133203         | ,000             | ,000  | 1,000 |
|                                              | 403133204         | ,000             | ,000  | ,000  |
|                                              | 403133315         | ,000             | ,000  | ,000  |
|                                              | 403133322         | ,000             | ,000  | ,000  |
|                                              | 403133401         | ,000             | ,000  | ,000  |
|                                              | 403133402         | ,000             | ,000  | ,000  |
|                                              | 403133550         | ,000             | ,000  | ,000  |
|                                              | 403133772         | ,000             | ,000  | ,000  |
|                                              | 403135803         | ,000             | ,000  | ,000  |
|                                              | 404060001         | ,000             | ,000  | ,000  |
|                                              | 404060002         | ,000             | ,000  | ,000  |
|                                              | 404310003         | ,000             | ,000  | ,000  |
|                                              | 404310004         | ,000             | ,000  | ,000  |
|                                              | 502300005         | ,000             | ,000  | ,000  |
|                                              | 502300006         | ,000             | ,000  | ,000  |
|                                              | 502300007         | ,000             | ,000  | ,000  |
|                                              | 502300214         | ,000             | ,000  | ,000  |
|                                              | 502300411         | ,000             | ,000  | ,000  |
|                                              | 502300415         | ,000             | ,000  | ,000  |
|                                              | 502300416         | ,000             | ,000  | ,000  |
|                                              | 502300811         | ,000             | ,000  | ,000  |
|                                              | 502300913         | ,000             | ,000  | ,000  |
| bv3 belasnting vs paoncil dubbla intervallet | 1 medelbelastning |                  |       |       |
|                                              | 2 underbelastning |                  |       |       |
|                                              | 3 överbelastning  |                  |       |       |

## Categorical Variables Codings

|                                              |                   | Parameter coding |       |       |
|----------------------------------------------|-------------------|------------------|-------|-------|
|                                              |                   | (15)             | (16)  | (17)  |
| VASTY2 (SAIR*10000)+VASTY                    | 403073101         | ,000             | ,000  | ,000  |
|                                              | 403073102         | ,000             | ,000  | ,000  |
|                                              | 403073103         | ,000             | ,000  | ,000  |
|                                              | 403073202         | ,000             | ,000  | ,000  |
|                                              | 403073203         | ,000             | ,000  | ,000  |
|                                              | 403073204         | ,000             | ,000  | ,000  |
|                                              | 403073303         | ,000             | ,000  | ,000  |
|                                              | 403073651         | ,000             | ,000  | ,000  |
|                                              | 403073771         | ,000             | ,000  | ,000  |
|                                              | 403133102         | ,000             | ,000  | ,000  |
|                                              | 403133106         | ,000             | ,000  | ,000  |
|                                              | 403133107         | ,000             | ,000  | ,000  |
|                                              | 403133109         | ,000             | ,000  | ,000  |
|                                              | 403133202         | ,000             | ,000  | ,000  |
|                                              | 403133203         | ,000             | ,000  | ,000  |
|                                              | 403133204         | 1,000            | ,000  | ,000  |
|                                              | 403133315         | ,000             | 1,000 | ,000  |
|                                              | 403133322         | ,000             | ,000  | 1,000 |
|                                              | 403133401         | ,000             | ,000  | ,000  |
|                                              | 403133402         | ,000             | ,000  | ,000  |
|                                              | 403133550         | ,000             | ,000  | ,000  |
|                                              | 403133772         | ,000             | ,000  | ,000  |
|                                              | 403135803         | ,000             | ,000  | ,000  |
|                                              | 404060001         | ,000             | ,000  | ,000  |
|                                              | 404060002         | ,000             | ,000  | ,000  |
|                                              | 404310003         | ,000             | ,000  | ,000  |
|                                              | 404310004         | ,000             | ,000  | ,000  |
|                                              | 502300005         | ,000             | ,000  | ,000  |
|                                              | 502300006         | ,000             | ,000  | ,000  |
|                                              | 502300007         | ,000             | ,000  | ,000  |
|                                              | 502300214         | ,000             | ,000  | ,000  |
|                                              | 502300411         | ,000             | ,000  | ,000  |
|                                              | 502300415         | ,000             | ,000  | ,000  |
|                                              | 502300416         | ,000             | ,000  | ,000  |
|                                              | 502300811         | ,000             | ,000  | ,000  |
|                                              | 502300913         | ,000             | ,000  | ,000  |
| bv3 belasnting vs paoncil dubbla intervallet | 1 medelbelastning |                  |       |       |
|                                              | 2 underbelastning |                  |       |       |
|                                              | 3 överbelastning  |                  |       |       |

## Categorical Variables Codings

|                                              |                   | Parameter coding |       |       |
|----------------------------------------------|-------------------|------------------|-------|-------|
|                                              |                   | (18)             | (19)  | (20)  |
| VASTY2 (SAIR*10000)+VASTY                    | 403073101         | ,000             | ,000  | ,000  |
|                                              | 403073102         | ,000             | ,000  | ,000  |
|                                              | 403073103         | ,000             | ,000  | ,000  |
|                                              | 403073202         | ,000             | ,000  | ,000  |
|                                              | 403073203         | ,000             | ,000  | ,000  |
|                                              | 403073204         | ,000             | ,000  | ,000  |
|                                              | 403073303         | ,000             | ,000  | ,000  |
|                                              | 403073651         | ,000             | ,000  | ,000  |
|                                              | 403073771         | ,000             | ,000  | ,000  |
|                                              | 403133102         | ,000             | ,000  | ,000  |
|                                              | 403133106         | ,000             | ,000  | ,000  |
|                                              | 403133107         | ,000             | ,000  | ,000  |
|                                              | 403133109         | ,000             | ,000  | ,000  |
|                                              | 403133202         | ,000             | ,000  | ,000  |
|                                              | 403133203         | ,000             | ,000  | ,000  |
|                                              | 403133204         | ,000             | ,000  | ,000  |
|                                              | 403133315         | ,000             | ,000  | ,000  |
|                                              | 403133322         | ,000             | ,000  | ,000  |
|                                              | 403133401         | 1,000            | ,000  | ,000  |
|                                              | 403133402         | ,000             | 1,000 | ,000  |
|                                              | 403133550         | ,000             | ,000  | 1,000 |
|                                              | 403133772         | ,000             | ,000  | ,000  |
|                                              | 403135803         | ,000             | ,000  | ,000  |
|                                              | 404060001         | ,000             | ,000  | ,000  |
|                                              | 404060002         | ,000             | ,000  | ,000  |
|                                              | 404310003         | ,000             | ,000  | ,000  |
|                                              | 404310004         | ,000             | ,000  | ,000  |
|                                              | 502300005         | ,000             | ,000  | ,000  |
|                                              | 502300006         | ,000             | ,000  | ,000  |
|                                              | 502300007         | ,000             | ,000  | ,000  |
|                                              | 502300214         | ,000             | ,000  | ,000  |
|                                              | 502300411         | ,000             | ,000  | ,000  |
|                                              | 502300415         | ,000             | ,000  | ,000  |
|                                              | 502300416         | ,000             | ,000  | ,000  |
|                                              | 502300811         | ,000             | ,000  | ,000  |
|                                              | 502300913         | ,000             | ,000  | ,000  |
| bv3 belasnting vs paoncil dubbla intervallet | 1 medelbelastning |                  |       |       |
|                                              | 2 underbelastning |                  |       |       |
|                                              | 3 överbelastning  |                  |       |       |



## Categorical Variables Codings

|                                              |                   | Parameter coding |       |       |
|----------------------------------------------|-------------------|------------------|-------|-------|
|                                              |                   | (21)             | (22)  | (23)  |
| VASTY2 (SAIR*10000)+VASTY                    | 403073101         | ,000             | ,000  | ,000  |
|                                              | 403073102         | ,000             | ,000  | ,000  |
|                                              | 403073103         | ,000             | ,000  | ,000  |
|                                              | 403073202         | ,000             | ,000  | ,000  |
|                                              | 403073203         | ,000             | ,000  | ,000  |
|                                              | 403073204         | ,000             | ,000  | ,000  |
|                                              | 403073303         | ,000             | ,000  | ,000  |
|                                              | 403073651         | ,000             | ,000  | ,000  |
|                                              | 403073771         | ,000             | ,000  | ,000  |
|                                              | 403133102         | ,000             | ,000  | ,000  |
|                                              | 403133106         | ,000             | ,000  | ,000  |
|                                              | 403133107         | ,000             | ,000  | ,000  |
|                                              | 403133109         | ,000             | ,000  | ,000  |
|                                              | 403133202         | ,000             | ,000  | ,000  |
|                                              | 403133203         | ,000             | ,000  | ,000  |
|                                              | 403133204         | ,000             | ,000  | ,000  |
|                                              | 403133315         | ,000             | ,000  | ,000  |
|                                              | 403133322         | ,000             | ,000  | ,000  |
|                                              | 403133401         | ,000             | ,000  | ,000  |
|                                              | 403133402         | ,000             | ,000  | ,000  |
|                                              | 403133550         | ,000             | ,000  | ,000  |
|                                              | 403133772         | 1,000            | ,000  | ,000  |
|                                              | 403135803         | ,000             | 1,000 | ,000  |
|                                              | 404060001         | ,000             | ,000  | 1,000 |
|                                              | 404060002         | ,000             | ,000  | ,000  |
|                                              | 404310003         | ,000             | ,000  | ,000  |
|                                              | 404310004         | ,000             | ,000  | ,000  |
|                                              | 502300005         | ,000             | ,000  | ,000  |
|                                              | 502300006         | ,000             | ,000  | ,000  |
|                                              | 502300007         | ,000             | ,000  | ,000  |
|                                              | 502300214         | ,000             | ,000  | ,000  |
|                                              | 502300411         | ,000             | ,000  | ,000  |
|                                              | 502300415         | ,000             | ,000  | ,000  |
|                                              | 502300416         | ,000             | ,000  | ,000  |
|                                              | 502300811         | ,000             | ,000  | ,000  |
|                                              | 502300913         | ,000             | ,000  | ,000  |
| bv3 belasnting vs paoncil dubbla intervallet | 1 medelbelastning |                  |       |       |
|                                              | 2 underbelastning |                  |       |       |
|                                              | 3 överbelastning  |                  |       |       |

## Categorical Variables Codings

|                                              |                   | Parameter coding |       |       |
|----------------------------------------------|-------------------|------------------|-------|-------|
|                                              |                   | (24)             | (25)  | (26)  |
| VASTY2 (SAIR*10000)+VASTY                    | 403073101         | ,000             | ,000  | ,000  |
|                                              | 403073102         | ,000             | ,000  | ,000  |
|                                              | 403073103         | ,000             | ,000  | ,000  |
|                                              | 403073202         | ,000             | ,000  | ,000  |
|                                              | 403073203         | ,000             | ,000  | ,000  |
|                                              | 403073204         | ,000             | ,000  | ,000  |
|                                              | 403073303         | ,000             | ,000  | ,000  |
|                                              | 403073651         | ,000             | ,000  | ,000  |
|                                              | 403073771         | ,000             | ,000  | ,000  |
|                                              | 403133102         | ,000             | ,000  | ,000  |
|                                              | 403133106         | ,000             | ,000  | ,000  |
|                                              | 403133107         | ,000             | ,000  | ,000  |
|                                              | 403133109         | ,000             | ,000  | ,000  |
|                                              | 403133202         | ,000             | ,000  | ,000  |
|                                              | 403133203         | ,000             | ,000  | ,000  |
|                                              | 403133204         | ,000             | ,000  | ,000  |
|                                              | 403133315         | ,000             | ,000  | ,000  |
|                                              | 403133322         | ,000             | ,000  | ,000  |
|                                              | 403133401         | ,000             | ,000  | ,000  |
|                                              | 403133402         | ,000             | ,000  | ,000  |
|                                              | 403133550         | ,000             | ,000  | ,000  |
|                                              | 403133772         | ,000             | ,000  | ,000  |
|                                              | 403135803         | ,000             | ,000  | ,000  |
|                                              | 404060001         | ,000             | ,000  | ,000  |
|                                              | 404060002         | 1,000            | ,000  | ,000  |
|                                              | 404310003         | ,000             | 1,000 | ,000  |
|                                              | 404310004         | ,000             | ,000  | 1,000 |
|                                              | 502300005         | ,000             | ,000  | ,000  |
|                                              | 502300006         | ,000             | ,000  | ,000  |
|                                              | 502300007         | ,000             | ,000  | ,000  |
|                                              | 502300214         | ,000             | ,000  | ,000  |
|                                              | 502300411         | ,000             | ,000  | ,000  |
|                                              | 502300415         | ,000             | ,000  | ,000  |
|                                              | 502300416         | ,000             | ,000  | ,000  |
|                                              | 502300811         | ,000             | ,000  | ,000  |
|                                              | 502300913         | ,000             | ,000  | ,000  |
| bv3 belasnting vs paoncil dubbla intervallet | 1 medelbelastning |                  |       |       |
|                                              | 2 underbelastning |                  |       |       |
|                                              | 3 överbelastning  |                  |       |       |

## Categorical Variables Codings

|                                              |                   | Parameter coding |       |       |
|----------------------------------------------|-------------------|------------------|-------|-------|
|                                              |                   | (27)             | (28)  | (29)  |
| VASTY2 (SAIR*10000)+VASTY                    | 403073101         | ,000             | ,000  | ,000  |
|                                              | 403073102         | ,000             | ,000  | ,000  |
|                                              | 403073103         | ,000             | ,000  | ,000  |
|                                              | 403073202         | ,000             | ,000  | ,000  |
|                                              | 403073203         | ,000             | ,000  | ,000  |
|                                              | 403073204         | ,000             | ,000  | ,000  |
|                                              | 403073303         | ,000             | ,000  | ,000  |
|                                              | 403073651         | ,000             | ,000  | ,000  |
|                                              | 403073771         | ,000             | ,000  | ,000  |
|                                              | 403133102         | ,000             | ,000  | ,000  |
|                                              | 403133106         | ,000             | ,000  | ,000  |
|                                              | 403133107         | ,000             | ,000  | ,000  |
|                                              | 403133109         | ,000             | ,000  | ,000  |
|                                              | 403133202         | ,000             | ,000  | ,000  |
|                                              | 403133203         | ,000             | ,000  | ,000  |
|                                              | 403133204         | ,000             | ,000  | ,000  |
|                                              | 403133315         | ,000             | ,000  | ,000  |
|                                              | 403133322         | ,000             | ,000  | ,000  |
|                                              | 403133401         | ,000             | ,000  | ,000  |
|                                              | 403133402         | ,000             | ,000  | ,000  |
|                                              | 403133550         | ,000             | ,000  | ,000  |
|                                              | 403133772         | ,000             | ,000  | ,000  |
|                                              | 403135803         | ,000             | ,000  | ,000  |
|                                              | 404060001         | ,000             | ,000  | ,000  |
|                                              | 404060002         | ,000             | ,000  | ,000  |
|                                              | 404310003         | ,000             | ,000  | ,000  |
|                                              | 404310004         | ,000             | ,000  | ,000  |
|                                              | 502300005         | 1,000            | ,000  | ,000  |
|                                              | 502300006         | ,000             | 1,000 | ,000  |
|                                              | 502300007         | ,000             | ,000  | 1,000 |
|                                              | 502300214         | ,000             | ,000  | ,000  |
|                                              | 502300411         | ,000             | ,000  | ,000  |
|                                              | 502300415         | ,000             | ,000  | ,000  |
|                                              | 502300416         | ,000             | ,000  | ,000  |
|                                              | 502300811         | ,000             | ,000  | ,000  |
|                                              | 502300913         | ,000             | ,000  | ,000  |
| bv3 belasnting vs paoncil dubbla intervallet | 1 medelbelastning |                  |       |       |
|                                              | 2 underbelastning |                  |       |       |
|                                              | 3 överbelastning  |                  |       |       |

## Categorical Variables Codings

|                                              |                   | Parameter coding |       |       |
|----------------------------------------------|-------------------|------------------|-------|-------|
|                                              |                   | (30)             | (31)  | (32)  |
| VASTY2 (SAIR*10000)+VASTY                    | 403073101         | ,000             | ,000  | ,000  |
|                                              | 403073102         | ,000             | ,000  | ,000  |
|                                              | 403073103         | ,000             | ,000  | ,000  |
|                                              | 403073202         | ,000             | ,000  | ,000  |
|                                              | 403073203         | ,000             | ,000  | ,000  |
|                                              | 403073204         | ,000             | ,000  | ,000  |
|                                              | 403073303         | ,000             | ,000  | ,000  |
|                                              | 403073651         | ,000             | ,000  | ,000  |
|                                              | 403073771         | ,000             | ,000  | ,000  |
|                                              | 403133102         | ,000             | ,000  | ,000  |
|                                              | 403133106         | ,000             | ,000  | ,000  |
|                                              | 403133107         | ,000             | ,000  | ,000  |
|                                              | 403133109         | ,000             | ,000  | ,000  |
|                                              | 403133202         | ,000             | ,000  | ,000  |
|                                              | 403133203         | ,000             | ,000  | ,000  |
|                                              | 403133204         | ,000             | ,000  | ,000  |
|                                              | 403133315         | ,000             | ,000  | ,000  |
|                                              | 403133322         | ,000             | ,000  | ,000  |
|                                              | 403133401         | ,000             | ,000  | ,000  |
|                                              | 403133402         | ,000             | ,000  | ,000  |
|                                              | 403133550         | ,000             | ,000  | ,000  |
|                                              | 403133772         | ,000             | ,000  | ,000  |
|                                              | 403135803         | ,000             | ,000  | ,000  |
|                                              | 404060001         | ,000             | ,000  | ,000  |
|                                              | 404060002         | ,000             | ,000  | ,000  |
|                                              | 404310003         | ,000             | ,000  | ,000  |
|                                              | 404310004         | ,000             | ,000  | ,000  |
|                                              | 502300005         | ,000             | ,000  | ,000  |
|                                              | 502300006         | ,000             | ,000  | ,000  |
|                                              | 502300007         | ,000             | ,000  | ,000  |
|                                              | 502300214         | 1,000            | ,000  | ,000  |
|                                              | 502300411         | ,000             | 1,000 | ,000  |
|                                              | 502300415         | ,000             | ,000  | 1,000 |
|                                              | 502300416         | ,000             | ,000  | ,000  |
|                                              | 502300811         | ,000             | ,000  | ,000  |
|                                              | 502300913         | ,000             | ,000  | ,000  |
| bv3 belasnting vs paoncil dubbla intervallet | 1 medelbelastning |                  |       |       |
|                                              | 2 underbelastning |                  |       |       |
|                                              | 3 överbelastning  |                  |       |       |

## Categorical Variables Codings

|                                              |                   | Parameter coding |       |       |
|----------------------------------------------|-------------------|------------------|-------|-------|
|                                              |                   | (33)             | (34)  | (35)  |
| VASTY2 (SAIR*10000)+VASTY                    | 403073101         | ,000             | ,000  | ,000  |
|                                              | 403073102         | ,000             | ,000  | ,000  |
|                                              | 403073103         | ,000             | ,000  | ,000  |
|                                              | 403073202         | ,000             | ,000  | ,000  |
|                                              | 403073203         | ,000             | ,000  | ,000  |
|                                              | 403073204         | ,000             | ,000  | ,000  |
|                                              | 403073303         | ,000             | ,000  | ,000  |
|                                              | 403073651         | ,000             | ,000  | ,000  |
|                                              | 403073771         | ,000             | ,000  | ,000  |
|                                              | 403133102         | ,000             | ,000  | ,000  |
|                                              | 403133106         | ,000             | ,000  | ,000  |
|                                              | 403133107         | ,000             | ,000  | ,000  |
|                                              | 403133109         | ,000             | ,000  | ,000  |
|                                              | 403133202         | ,000             | ,000  | ,000  |
|                                              | 403133203         | ,000             | ,000  | ,000  |
|                                              | 403133204         | ,000             | ,000  | ,000  |
|                                              | 403133315         | ,000             | ,000  | ,000  |
|                                              | 403133322         | ,000             | ,000  | ,000  |
|                                              | 403133401         | ,000             | ,000  | ,000  |
|                                              | 403133402         | ,000             | ,000  | ,000  |
|                                              | 403133550         | ,000             | ,000  | ,000  |
|                                              | 403133772         | ,000             | ,000  | ,000  |
|                                              | 403135803         | ,000             | ,000  | ,000  |
|                                              | 404060001         | ,000             | ,000  | ,000  |
|                                              | 404060002         | ,000             | ,000  | ,000  |
|                                              | 404310003         | ,000             | ,000  | ,000  |
|                                              | 404310004         | ,000             | ,000  | ,000  |
|                                              | 502300005         | ,000             | ,000  | ,000  |
|                                              | 502300006         | ,000             | ,000  | ,000  |
|                                              | 502300007         | ,000             | ,000  | ,000  |
|                                              | 502300214         | ,000             | ,000  | ,000  |
|                                              | 502300411         | ,000             | ,000  | ,000  |
|                                              | 502300415         | ,000             | ,000  | ,000  |
|                                              | 502300416         | 1,000            | ,000  | ,000  |
|                                              | 502300811         | ,000             | 1,000 | ,000  |
|                                              | 502300913         | ,000             | ,000  | 1,000 |
| bv3 belasnting vs paoncil dubbla intervallet | 1 medelbelastning |                  |       |       |
|                                              | 2 underbelastning |                  |       |       |
|                                              | 3 överbelastning  |                  |       |       |

**Block 0: Beginning Block**

Classification Table<sup>a,b</sup>

| Observed           |                              |                     | Predicted        |                     |
|--------------------|------------------------------|---------------------|------------------|---------------------|
|                    |                              |                     | 0 ingen händelse | 1 minst en händelse |
| Step 0             | hand01 händelse nej eller ja | 0 ingen händelse    | 11108            | 0                   |
|                    |                              | 1 minst en händelse | 1367             | 0                   |
| Overall Percentage |                              |                     |                  |                     |

Classification Table<sup>a,b</sup>

| Observed           |                              |                     | Predicted          |
|--------------------|------------------------------|---------------------|--------------------|
|                    |                              |                     | Percentage Correct |
| Step 0             | hand01 händelse nej eller ja | 0 ingen händelse    | 100,0              |
|                    |                              | 1 minst en händelse | ,0                 |
| Overall Percentage |                              |                     | 89,0               |

a. Constant is included in the model.

b. The cut value is ,500

Variables in the Equation

|                 | B      | S.E. | Wald     | df | Sig. | Exp(B) |
|-----------------|--------|------|----------|----|------|--------|
| Step 0 Constant | -2,095 | ,029 | 5342,584 | 1  | ,000 | ,123   |

## Variables not in the Equation

|        |                    |            | Score   | df | Sig. |
|--------|--------------------|------------|---------|----|------|
| Step 0 | Variables          | bv3        | 48,977  | 2  | ,000 |
|        |                    | bv3(1)     | 36,781  | 1  | ,000 |
|        |                    | bv3(2)     | 19,249  | 1  | ,000 |
|        |                    | VASTY2     | 541,214 | 35 | ,000 |
|        |                    | VASTY2(1)  | 1,169   | 1  | ,280 |
|        |                    | VASTY2(2)  | 87,511  | 1  | ,000 |
|        |                    | VASTY2(3)  | 13,995  | 1  | ,000 |
|        |                    | VASTY2(4)  | ,464    | 1  | ,496 |
|        |                    | VASTY2(5)  | 5,526   | 1  | ,019 |
|        |                    | VASTY2(6)  | 19,435  | 1  | ,000 |
|        |                    | VASTY2(7)  | 86,074  | 1  | ,000 |
|        |                    | VASTY2(8)  | 1,043   | 1  | ,307 |
|        |                    | VASTY2(9)  | ,408    | 1  | ,523 |
|        |                    | VASTY2(10) | 58,583  | 1  | ,000 |
|        |                    | VASTY2(11) | 33,445  | 1  | ,000 |
|        |                    | VASTY2(12) | ,029    | 1  | ,865 |
|        |                    | VASTY2(13) | 33,445  | 1  | ,000 |
|        |                    | VASTY2(14) | 4,163   | 1  | ,041 |
|        |                    | VASTY2(15) | ,464    | 1  | ,496 |
|        |                    | VASTY2(16) | ,763    | 1  | ,382 |
|        |                    | VASTY2(17) | 24,320  | 1  | ,000 |
|        |                    | VASTY2(18) | 17,742  | 1  | ,000 |
|        |                    | VASTY2(19) | 27,791  | 1  | ,000 |
|        |                    | VASTY2(20) | ,015    | 1  | ,902 |
|        |                    | VASTY2(21) | 2,890   | 1  | ,089 |
|        |                    | VASTY2(22) | ,462    | 1  | ,497 |
|        |                    | VASTY2(23) | 15,306  | 1  | ,000 |
|        |                    | VASTY2(24) | 12,594  | 1  | ,000 |
|        |                    | VASTY2(25) | ,128    | 1  | ,720 |
|        |                    | VASTY2(26) | 12,864  | 1  | ,000 |
|        |                    | VASTY2(27) | 24,439  | 1  | ,000 |
|        |                    | VASTY2(28) | 9,963   | 1  | ,002 |
|        |                    | VASTY2(29) | 18,184  | 1  | ,000 |
|        |                    | VASTY2(30) | ,486    | 1  | ,486 |
|        |                    | VASTY2(31) | 6,400   | 1  | ,011 |
|        |                    | VASTY2(32) | 1,626   | 1  | ,202 |
|        |                    | VASTY2(33) | 1,336   | 1  | ,248 |
|        |                    | VASTY2(34) | 29,489  | 1  | ,000 |
|        |                    | VASTY2(35) | 3,668   | 1  | ,055 |
|        | Overall Statistics |            | 562,675 | 37 | ,000 |

**Block 1: Method = Enter**

## Omnibus Tests of Model Coefficients

|        |       | Chi-square | df | Sig. |
|--------|-------|------------|----|------|
| Step 1 | Step  | 563,072    | 37 | ,000 |
|        | Block | 563,072    | 37 | ,000 |
|        | Model | 563,072    | 37 | ,000 |

## Model Summary

| Step | -2 Log likelihood     | Cox & Snell R Square | Nagelkerke R Square |
|------|-----------------------|----------------------|---------------------|
| 1    | 8060,511 <sup>a</sup> | ,044                 | ,088                |

a. Estimation terminated at iteration number 6 because parameter estimates changed by less than ,001.

Classification Table<sup>a</sup>

|                    |                              | Predicted                    |                     |
|--------------------|------------------------------|------------------------------|---------------------|
|                    |                              | hand01 händelse nej eller ja |                     |
| Observed           |                              | 0 ingen händelse             | 1 minst en händelse |
| Step 1             | hand01 händelse nej eller ja | 11108                        | 0                   |
|                    |                              | 1367                         | 0                   |
| Overall Percentage |                              |                              |                     |

Classification Table<sup>a</sup>

| Observed           |                              | Predicted          |
|--------------------|------------------------------|--------------------|
|                    |                              | Percentage Correct |
| Step 1             | hand01 händelse nej eller ja | 100,0              |
|                    |                              | ,0                 |
| Overall Percentage |                              | 89,0               |

a. The cut value is ,500



## Variables in the Equation

|                         | B      | S.E. | Wald    | df | Sig. | Exp(B) |
|-------------------------|--------|------|---------|----|------|--------|
| Step 1 <sup>a</sup> bv3 |        |      | 23,032  | 2  | ,000 |        |
| bv3(1)                  | -,459  | ,117 | 15,260  | 1  | ,000 | ,632   |
| bv3(2)                  | ,190   | ,083 | 5,198   | 1  | ,023 | 1,209  |
| VASTY2                  |        |      | 434,065 | 35 | ,000 |        |
| VASTY2(1)               | ,380   | ,240 | 2,505   | 1  | ,113 | 1,462  |
| VASTY2(2)               | 1,217  | ,216 | 31,701  | 1  | ,000 | 3,378  |
| VASTY2(3)               | -,782  | ,303 | 6,655   | 1  | ,010 | ,457   |
| VASTY2(4)               | ,209   | ,243 | ,740    | 1  | ,390 | 1,233  |
| VASTY2(5)               | -,338  | ,282 | 1,439   | 1  | ,230 | ,713   |
| VASTY2(6)               | -1,001 | ,328 | 9,317   | 1  | ,002 | ,368   |
| VASTY2(7)               | 1,105  | ,221 | 24,884  | 1  | ,000 | 3,019  |
| VASTY2(8)               | ,304   | ,240 | 1,612   | 1  | ,204 | 1,356  |
| VASTY2(9)               | ,248   | ,246 | 1,014   | 1  | ,314 | 1,281  |
| VASTY2(10)              | 1,050  | ,219 | 23,059  | 1  | ,000 | 2,859  |
| VASTY2(11)              | ,907   | ,223 | 16,604  | 1  | ,000 | 2,478  |
| VASTY2(12)              | ,124   | ,247 | ,250    | 1  | ,617 | 1,132  |
| VASTY2(13)              | ,841   | ,223 | 14,230  | 1  | ,000 | 2,319  |
| VASTY2(14)              | -,246  | ,267 | ,845    | 1  | ,358 | ,782   |
| VASTY2(15)              | ,268   | ,242 | 1,228   | 1  | ,268 | 1,307  |
| VASTY2(16)              | ,365   | ,289 | 1,600   | 1  | ,206 | 1,441  |
| VASTY2(17)              | -1,180 | ,355 | 11,026  | 1  | ,001 | ,307   |
| VASTY2(18)              | -,861  | ,320 | 7,248   | 1  | ,007 | ,423   |
| VASTY2(19)              | -1,136 | ,388 | 8,571   | 1  | ,003 | ,321   |
| VASTY2(20)              | ,115   | ,261 | ,195    | 1  | ,658 | 1,122  |
| VASTY2(21)              | -,156  | ,262 | ,353    | 1  | ,552 | ,856   |
| VASTY2(22)              | ,112   | ,252 | ,197    | 1  | ,657 | 1,118  |
| VASTY2(23)              | ,738   | ,228 | 10,514  | 1  | ,001 | 2,091  |
| VASTY2(24)              | ,588   | ,230 | 6,550   | 1  | ,010 | 1,800  |
| VASTY2(25)              | ,147   | ,264 | ,311    | 1  | ,577 | 1,159  |
| VASTY2(26)              | -,806  | ,337 | 5,742   | 1  | ,017 | ,446   |
| VASTY2(27)              | -1,231 | ,356 | 11,964  | 1  | ,001 | ,292   |
| VASTY2(28)              | -,842  | ,370 | 5,165   | 1  | ,023 | ,431   |
| VASTY2(29)              | -,916  | ,319 | 8,224   | 1  | ,004 | ,400   |
| VASTY2(30)              | ,018   | ,252 | ,005    | 1  | ,943 | 1,018  |
| VASTY2(31)              | ,581   | ,234 | 6,147   | 1  | ,013 | 1,787  |
| VASTY2(32)              | ,037   | ,260 | ,020    | 1  | ,888 | 1,037  |
| VASTY2(33)              | ,045   | ,258 | ,031    | 1  | ,860 | 1,046  |
| VASTY2(34)              | -1,535 | ,400 | 14,698  | 1  | ,000 | ,215   |
| VASTY2(35)              | ,411   | ,244 | 2,829   | 1  | ,093 | 1,508  |
| Constant                | -2,246 | ,180 | 155,166 | 1  | ,000 | ,106   |

## Variables in the Equation

|                     |            | 95% C.I. for EXP(B) |       |
|---------------------|------------|---------------------|-------|
|                     |            | Lower               | Upper |
| Step 1 <sup>a</sup> | bv3        |                     |       |
|                     | bv3(1)     | ,502                | ,796  |
|                     | bv3(2)     | 1,027               | 1,424 |
|                     | VASTY2     |                     |       |
|                     | VASTY2(1)  | ,914                | 2,339 |
|                     | VASTY2(2)  | 2,211               | 5,160 |
|                     | VASTY2(3)  | ,253                | ,829  |
|                     | VASTY2(4)  | ,766                | 1,984 |
|                     | VASTY2(5)  | ,411                | 1,239 |
|                     | VASTY2(6)  | ,193                | ,699  |
|                     | VASTY2(7)  | 1,956               | 4,660 |
|                     | VASTY2(8)  | ,847                | 2,169 |
|                     | VASTY2(9)  | ,791                | 2,074 |
|                     | VASTY2(10) | 1,862               | 4,390 |
|                     | VASTY2(11) | 1,601               | 3,833 |
|                     | VASTY2(12) | ,697                | 1,838 |
|                     | VASTY2(13) | 1,498               | 3,590 |
|                     | VASTY2(14) | ,463                | 1,321 |
|                     | VASTY2(15) | ,814                | 2,099 |
|                     | VASTY2(16) | ,818                | 2,538 |
|                     | VASTY2(17) | ,153                | ,617  |
|                     | VASTY2(18) | ,226                | ,791  |
|                     | VASTY2(19) | ,150                | ,687  |
|                     | VASTY2(20) | ,673                | 1,872 |
|                     | VASTY2(21) | ,512                | 1,431 |
|                     | VASTY2(22) | ,683                | 1,832 |
|                     | VASTY2(23) | 1,339               | 3,267 |
|                     | VASTY2(24) | 1,148               | 2,823 |
|                     | VASTY2(25) | ,690                | 1,945 |
|                     | VASTY2(26) | ,231                | ,863  |
|                     | VASTY2(27) | ,145                | ,587  |
|                     | VASTY2(28) | ,208                | ,891  |
|                     | VASTY2(29) | ,214                | ,748  |
|                     | VASTY2(30) | ,622                | 1,667 |
|                     | VASTY2(31) | 1,129               | 2,828 |
|                     | VASTY2(32) | ,623                | 1,728 |
|                     | VASTY2(33) | ,631                | 1,734 |
|                     | VASTY2(34) | ,098                | ,472  |
|                     | VASTY2(35) | ,934                | 2,435 |
|                     | Constant   |                     |       |

a. Variable(s) entered on step 1: bv3, VASTY2.

```

1
2
3 LOGISTIC REGRESSION VARIABLES hand01
4   /METHOD=ENTER sv3 VASTY2
5   /CONTRAST (sv3)=Indicator(1)
6   /CONTRAST (VASTY2)=Indicator(1)
7   /PRINT=CI(95)
8   /CRITERIA=PIN(0.05) POUT(0.10) ITERATE(20) CUT(0.5).
9
10
11

```

## Logistic Regression

[DataSet6] C:\cWordjan\Rafaela\_VCS\alla\_tillsammans\abo\_bjo\_vasa\_v1.sav

### Case Processing Summary

| Unweighted Cases <sup>a</sup> |                      | N     | Percent |
|-------------------------------|----------------------|-------|---------|
| Selected Cases                | Included in Analysis | 12475 | 100,0   |
|                               | Missing Cases        | 0     | ,0      |
|                               | Total                | 12475 | 100,0   |
| Unselected Cases              |                      | 0     | ,0      |
| Total                         |                      | 12475 | 100,0   |

a. If weight is in effect, see classification table for the total number of cases.

### Dependent Variable Encoding

| Original Value      | Internal Value |
|---------------------|----------------|
| 0 ingen händelse    | 0              |
| 1 minst en händelse | 1              |

## Categorical Variables Codings

|                                                  | Frequency | Parameter coding |       |       |
|--------------------------------------------------|-----------|------------------|-------|-------|
|                                                  |           | (1)              | (2)   | (3)   |
| VASTY2 (SAIR*10000)+VASTY 403073101              | 365       | ,000             | ,000  | ,000  |
| 403073102                                        | 362       | 1,000            | ,000  | ,000  |
| 403073103                                        | 365       | ,000             | 1,000 | ,000  |
| 403073202                                        | 365       | ,000             | ,000  | 1,000 |
| 403073203                                        | 365       | ,000             | ,000  | ,000  |
| 403073204                                        | 330       | ,000             | ,000  | ,000  |
| 403073303                                        | 364       | ,000             | ,000  | ,000  |
| 403073651                                        | 362       | ,000             | ,000  | ,000  |
| 403073771                                        | 365       | ,000             | ,000  | ,000  |
| 403133102                                        | 341       | ,000             | ,000  | ,000  |
| 403133106                                        | 365       | ,000             | ,000  | ,000  |
| 403133107                                        | 365       | ,000             | ,000  | ,000  |
| 403133109                                        | 365       | ,000             | ,000  | ,000  |
| 403133202                                        | 365       | ,000             | ,000  | ,000  |
| 403133203                                        | 365       | ,000             | ,000  | ,000  |
| 403133204                                        | 365       | ,000             | ,000  | ,000  |
| 403133315                                        | 177       | ,000             | ,000  | ,000  |
| 403133322                                        | 365       | ,000             | ,000  | ,000  |
| 403133401                                        | 362       | ,000             | ,000  | ,000  |
| 403133402                                        | 365       | ,000             | ,000  | ,000  |
| 403133550                                        | 298       | ,000             | ,000  | ,000  |
| 403133772                                        | 365       | ,000             | ,000  | ,000  |
| 403135803                                        | 365       | ,000             | ,000  | ,000  |
| 404060001                                        | 365       | ,000             | ,000  | ,000  |
| 404060002                                        | 366       | ,000             | ,000  | ,000  |
| 404310003                                        | 291       | ,000             | ,000  | ,000  |
| 404310004                                        | 291       | ,000             | ,000  | ,000  |
| 502300005                                        | 366       | ,000             | ,000  | ,000  |
| 502300006                                        | 225       | ,000             | ,000  | ,000  |
| 502300007                                        | 366       | ,000             | ,000  | ,000  |
| 502300214                                        | 366       | ,000             | ,000  | ,000  |
| 502300411                                        | 366       | ,000             | ,000  | ,000  |
| 502300415                                        | 360       | ,000             | ,000  | ,000  |
| 502300416                                        | 363       | ,000             | ,000  | ,000  |
| 502300811                                        | 364       | ,000             | ,000  | ,000  |
| 502300913                                        | 315       | ,000             | ,000  | ,000  |
| sv3 tredjedelar för standard 1 andra tredjedelen | 3172      | ,000             | ,000  |       |
| 2 första tredjedelen                             | 4718      | 1,000            | ,000  |       |
| 3 tredje tredjedelen                             | 4585      | ,000             | 1,000 |       |

## Categorical Variables Codings

|                              |                      | Parameter coding |       |       |       |
|------------------------------|----------------------|------------------|-------|-------|-------|
|                              |                      | (4)              | (5)   | (6)   | (7)   |
| VASTY2 (SAIR*10000)+VASTY    | 403073101            | ,000             | ,000  | ,000  | ,000  |
|                              | 403073102            | ,000             | ,000  | ,000  | ,000  |
|                              | 403073103            | ,000             | ,000  | ,000  | ,000  |
|                              | 403073202            | ,000             | ,000  | ,000  | ,000  |
|                              | 403073203            | 1,000            | ,000  | ,000  | ,000  |
|                              | 403073204            | ,000             | 1,000 | ,000  | ,000  |
|                              | 403073303            | ,000             | ,000  | 1,000 | ,000  |
|                              | 403073651            | ,000             | ,000  | ,000  | 1,000 |
|                              | 403073771            | ,000             | ,000  | ,000  | ,000  |
|                              | 403133102            | ,000             | ,000  | ,000  | ,000  |
|                              | 403133106            | ,000             | ,000  | ,000  | ,000  |
|                              | 403133107            | ,000             | ,000  | ,000  | ,000  |
|                              | 403133109            | ,000             | ,000  | ,000  | ,000  |
|                              | 403133202            | ,000             | ,000  | ,000  | ,000  |
|                              | 403133203            | ,000             | ,000  | ,000  | ,000  |
|                              | 403133204            | ,000             | ,000  | ,000  | ,000  |
|                              | 403133315            | ,000             | ,000  | ,000  | ,000  |
|                              | 403133322            | ,000             | ,000  | ,000  | ,000  |
|                              | 403133401            | ,000             | ,000  | ,000  | ,000  |
|                              | 403133402            | ,000             | ,000  | ,000  | ,000  |
|                              | 403133550            | ,000             | ,000  | ,000  | ,000  |
|                              | 403133772            | ,000             | ,000  | ,000  | ,000  |
|                              | 403135803            | ,000             | ,000  | ,000  | ,000  |
|                              | 404060001            | ,000             | ,000  | ,000  | ,000  |
|                              | 404060002            | ,000             | ,000  | ,000  | ,000  |
|                              | 404310003            | ,000             | ,000  | ,000  | ,000  |
|                              | 404310004            | ,000             | ,000  | ,000  | ,000  |
|                              | 502300005            | ,000             | ,000  | ,000  | ,000  |
|                              | 502300006            | ,000             | ,000  | ,000  | ,000  |
|                              | 502300007            | ,000             | ,000  | ,000  | ,000  |
|                              | 502300214            | ,000             | ,000  | ,000  | ,000  |
|                              | 502300411            | ,000             | ,000  | ,000  | ,000  |
|                              | 502300415            | ,000             | ,000  | ,000  | ,000  |
|                              | 502300416            | ,000             | ,000  | ,000  | ,000  |
|                              | 502300811            | ,000             | ,000  | ,000  | ,000  |
|                              | 502300913            | ,000             | ,000  | ,000  | ,000  |
| sv3 tredjedelar för standard | 1 andra tredjedelen  |                  |       |       |       |
|                              | 2 första tredjedelen |                  |       |       |       |
|                              | 3 tredje tredjedelen |                  |       |       |       |

## Categorical Variables Codings

|                              |                      | Parameter coding |       |       |       |
|------------------------------|----------------------|------------------|-------|-------|-------|
|                              |                      | (8)              | (9)   | (10)  | (11)  |
| VASTY2 (SAIR*10000)+VASTY    | 403073101            | ,000             | ,000  | ,000  | ,000  |
|                              | 403073102            | ,000             | ,000  | ,000  | ,000  |
|                              | 403073103            | ,000             | ,000  | ,000  | ,000  |
|                              | 403073202            | ,000             | ,000  | ,000  | ,000  |
|                              | 403073203            | ,000             | ,000  | ,000  | ,000  |
|                              | 403073204            | ,000             | ,000  | ,000  | ,000  |
|                              | 403073303            | ,000             | ,000  | ,000  | ,000  |
|                              | 403073651            | ,000             | ,000  | ,000  | ,000  |
|                              | 403073771            | 1,000            | ,000  | ,000  | ,000  |
|                              | 403133102            | ,000             | 1,000 | ,000  | ,000  |
|                              | 403133106            | ,000             | ,000  | 1,000 | ,000  |
|                              | 403133107            | ,000             | ,000  | ,000  | 1,000 |
|                              | 403133109            | ,000             | ,000  | ,000  | ,000  |
|                              | 403133202            | ,000             | ,000  | ,000  | ,000  |
|                              | 403133203            | ,000             | ,000  | ,000  | ,000  |
|                              | 403133204            | ,000             | ,000  | ,000  | ,000  |
|                              | 403133315            | ,000             | ,000  | ,000  | ,000  |
|                              | 403133322            | ,000             | ,000  | ,000  | ,000  |
|                              | 403133401            | ,000             | ,000  | ,000  | ,000  |
|                              | 403133402            | ,000             | ,000  | ,000  | ,000  |
|                              | 403133550            | ,000             | ,000  | ,000  | ,000  |
|                              | 403133772            | ,000             | ,000  | ,000  | ,000  |
|                              | 403135803            | ,000             | ,000  | ,000  | ,000  |
|                              | 404060001            | ,000             | ,000  | ,000  | ,000  |
|                              | 404060002            | ,000             | ,000  | ,000  | ,000  |
|                              | 404310003            | ,000             | ,000  | ,000  | ,000  |
|                              | 404310004            | ,000             | ,000  | ,000  | ,000  |
|                              | 502300005            | ,000             | ,000  | ,000  | ,000  |
|                              | 502300006            | ,000             | ,000  | ,000  | ,000  |
|                              | 502300007            | ,000             | ,000  | ,000  | ,000  |
|                              | 502300214            | ,000             | ,000  | ,000  | ,000  |
|                              | 502300411            | ,000             | ,000  | ,000  | ,000  |
|                              | 502300415            | ,000             | ,000  | ,000  | ,000  |
|                              | 502300416            | ,000             | ,000  | ,000  | ,000  |
|                              | 502300811            | ,000             | ,000  | ,000  | ,000  |
|                              | 502300913            | ,000             | ,000  | ,000  | ,000  |
| sv3 tredjedelar för standard | 1 andra tredjedelen  |                  |       |       |       |
|                              | 2 första tredjedelen |                  |       |       |       |
|                              | 3 tredje tredjedelen |                  |       |       |       |

## Categorical Variables Codings

|                              |                      | Parameter coding |       |       |       |
|------------------------------|----------------------|------------------|-------|-------|-------|
|                              |                      | (12)             | (13)  | (14)  | (15)  |
| VASTY2 (SAIR*10000)+VASTY    | 403073101            | ,000             | ,000  | ,000  | ,000  |
|                              | 403073102            | ,000             | ,000  | ,000  | ,000  |
|                              | 403073103            | ,000             | ,000  | ,000  | ,000  |
|                              | 403073202            | ,000             | ,000  | ,000  | ,000  |
|                              | 403073203            | ,000             | ,000  | ,000  | ,000  |
|                              | 403073204            | ,000             | ,000  | ,000  | ,000  |
|                              | 403073303            | ,000             | ,000  | ,000  | ,000  |
|                              | 403073651            | ,000             | ,000  | ,000  | ,000  |
|                              | 403073771            | ,000             | ,000  | ,000  | ,000  |
|                              | 403133102            | ,000             | ,000  | ,000  | ,000  |
|                              | 403133106            | ,000             | ,000  | ,000  | ,000  |
|                              | 403133107            | ,000             | ,000  | ,000  | ,000  |
|                              | 403133109            | 1,000            | ,000  | ,000  | ,000  |
|                              | 403133202            | ,000             | 1,000 | ,000  | ,000  |
|                              | 403133203            | ,000             | ,000  | 1,000 | ,000  |
|                              | 403133204            | ,000             | ,000  | ,000  | 1,000 |
|                              | 403133315            | ,000             | ,000  | ,000  | ,000  |
|                              | 403133322            | ,000             | ,000  | ,000  | ,000  |
|                              | 403133401            | ,000             | ,000  | ,000  | ,000  |
|                              | 403133402            | ,000             | ,000  | ,000  | ,000  |
|                              | 403133550            | ,000             | ,000  | ,000  | ,000  |
|                              | 403133772            | ,000             | ,000  | ,000  | ,000  |
|                              | 403135803            | ,000             | ,000  | ,000  | ,000  |
|                              | 404060001            | ,000             | ,000  | ,000  | ,000  |
|                              | 404060002            | ,000             | ,000  | ,000  | ,000  |
|                              | 404310003            | ,000             | ,000  | ,000  | ,000  |
|                              | 404310004            | ,000             | ,000  | ,000  | ,000  |
|                              | 502300005            | ,000             | ,000  | ,000  | ,000  |
|                              | 502300006            | ,000             | ,000  | ,000  | ,000  |
|                              | 502300007            | ,000             | ,000  | ,000  | ,000  |
|                              | 502300214            | ,000             | ,000  | ,000  | ,000  |
|                              | 502300411            | ,000             | ,000  | ,000  | ,000  |
|                              | 502300415            | ,000             | ,000  | ,000  | ,000  |
|                              | 502300416            | ,000             | ,000  | ,000  | ,000  |
|                              | 502300811            | ,000             | ,000  | ,000  | ,000  |
|                              | 502300913            | ,000             | ,000  | ,000  | ,000  |
| sv3 tredjedelar för standard | 1 andra tredjedelen  |                  |       |       |       |
|                              | 2 första tredjedelen |                  |       |       |       |
|                              | 3 tredje tredjedelen |                  |       |       |       |

## Categorical Variables Codings

|                              |                      | Parameter coding |       |       |       |
|------------------------------|----------------------|------------------|-------|-------|-------|
|                              |                      | (16)             | (17)  | (18)  | (19)  |
| VASTY2 (SAIR*10000)+VASTY    | 403073101            | ,000             | ,000  | ,000  | ,000  |
|                              | 403073102            | ,000             | ,000  | ,000  | ,000  |
|                              | 403073103            | ,000             | ,000  | ,000  | ,000  |
|                              | 403073202            | ,000             | ,000  | ,000  | ,000  |
|                              | 403073203            | ,000             | ,000  | ,000  | ,000  |
|                              | 403073204            | ,000             | ,000  | ,000  | ,000  |
|                              | 403073303            | ,000             | ,000  | ,000  | ,000  |
|                              | 403073651            | ,000             | ,000  | ,000  | ,000  |
|                              | 403073771            | ,000             | ,000  | ,000  | ,000  |
|                              | 403133102            | ,000             | ,000  | ,000  | ,000  |
|                              | 403133106            | ,000             | ,000  | ,000  | ,000  |
|                              | 403133107            | ,000             | ,000  | ,000  | ,000  |
|                              | 403133109            | ,000             | ,000  | ,000  | ,000  |
|                              | 403133202            | ,000             | ,000  | ,000  | ,000  |
|                              | 403133203            | ,000             | ,000  | ,000  | ,000  |
|                              | 403133204            | ,000             | ,000  | ,000  | ,000  |
|                              | 403133315            | 1,000            | ,000  | ,000  | ,000  |
|                              | 403133322            | ,000             | 1,000 | ,000  | ,000  |
|                              | 403133401            | ,000             | ,000  | 1,000 | ,000  |
|                              | 403133402            | ,000             | ,000  | ,000  | 1,000 |
|                              | 403133550            | ,000             | ,000  | ,000  | ,000  |
|                              | 403133772            | ,000             | ,000  | ,000  | ,000  |
|                              | 403135803            | ,000             | ,000  | ,000  | ,000  |
|                              | 404060001            | ,000             | ,000  | ,000  | ,000  |
|                              | 404060002            | ,000             | ,000  | ,000  | ,000  |
|                              | 404310003            | ,000             | ,000  | ,000  | ,000  |
|                              | 404310004            | ,000             | ,000  | ,000  | ,000  |
|                              | 502300005            | ,000             | ,000  | ,000  | ,000  |
|                              | 502300006            | ,000             | ,000  | ,000  | ,000  |
|                              | 502300007            | ,000             | ,000  | ,000  | ,000  |
|                              | 502300214            | ,000             | ,000  | ,000  | ,000  |
|                              | 502300411            | ,000             | ,000  | ,000  | ,000  |
|                              | 502300415            | ,000             | ,000  | ,000  | ,000  |
|                              | 502300416            | ,000             | ,000  | ,000  | ,000  |
|                              | 502300811            | ,000             | ,000  | ,000  | ,000  |
|                              | 502300913            | ,000             | ,000  | ,000  | ,000  |
| sv3 tredjedelar för standard | 1 andra tredjedelen  |                  |       |       |       |
|                              | 2 första tredjedelen |                  |       |       |       |
|                              | 3 tredje tredjedelen |                  |       |       |       |



## Categorical Variables Codings

|                              |                      | Parameter coding |       |       |       |
|------------------------------|----------------------|------------------|-------|-------|-------|
|                              |                      | (20)             | (21)  | (22)  | (23)  |
| VASTY2 (SAIR*10000)+VASTY    | 403073101            | ,000             | ,000  | ,000  | ,000  |
|                              | 403073102            | ,000             | ,000  | ,000  | ,000  |
|                              | 403073103            | ,000             | ,000  | ,000  | ,000  |
|                              | 403073202            | ,000             | ,000  | ,000  | ,000  |
|                              | 403073203            | ,000             | ,000  | ,000  | ,000  |
|                              | 403073204            | ,000             | ,000  | ,000  | ,000  |
|                              | 403073303            | ,000             | ,000  | ,000  | ,000  |
|                              | 403073651            | ,000             | ,000  | ,000  | ,000  |
|                              | 403073771            | ,000             | ,000  | ,000  | ,000  |
|                              | 403133102            | ,000             | ,000  | ,000  | ,000  |
|                              | 403133106            | ,000             | ,000  | ,000  | ,000  |
|                              | 403133107            | ,000             | ,000  | ,000  | ,000  |
|                              | 403133109            | ,000             | ,000  | ,000  | ,000  |
|                              | 403133202            | ,000             | ,000  | ,000  | ,000  |
|                              | 403133203            | ,000             | ,000  | ,000  | ,000  |
|                              | 403133204            | ,000             | ,000  | ,000  | ,000  |
|                              | 403133315            | ,000             | ,000  | ,000  | ,000  |
|                              | 403133322            | ,000             | ,000  | ,000  | ,000  |
|                              | 403133401            | ,000             | ,000  | ,000  | ,000  |
|                              | 403133402            | ,000             | ,000  | ,000  | ,000  |
|                              | 403133550            | 1,000            | ,000  | ,000  | ,000  |
|                              | 403133772            | ,000             | 1,000 | ,000  | ,000  |
|                              | 403135803            | ,000             | ,000  | 1,000 | ,000  |
|                              | 404060001            | ,000             | ,000  | ,000  | 1,000 |
|                              | 404060002            | ,000             | ,000  | ,000  | ,000  |
|                              | 404310003            | ,000             | ,000  | ,000  | ,000  |
|                              | 404310004            | ,000             | ,000  | ,000  | ,000  |
|                              | 502300005            | ,000             | ,000  | ,000  | ,000  |
|                              | 502300006            | ,000             | ,000  | ,000  | ,000  |
|                              | 502300007            | ,000             | ,000  | ,000  | ,000  |
|                              | 502300214            | ,000             | ,000  | ,000  | ,000  |
|                              | 502300411            | ,000             | ,000  | ,000  | ,000  |
|                              | 502300415            | ,000             | ,000  | ,000  | ,000  |
|                              | 502300416            | ,000             | ,000  | ,000  | ,000  |
|                              | 502300811            | ,000             | ,000  | ,000  | ,000  |
|                              | 502300913            | ,000             | ,000  | ,000  | ,000  |
| sv3 tredjedelar för standard | 1 andra tredjedelen  |                  |       |       |       |
|                              | 2 första tredjedelen |                  |       |       |       |
|                              | 3 tredje tredjedelen |                  |       |       |       |

## Categorical Variables Codings

|                              |                      | Parameter coding |       |       |       |
|------------------------------|----------------------|------------------|-------|-------|-------|
|                              |                      | (24)             | (25)  | (26)  | (27)  |
| VASTY2 (SAIR*10000)+VASTY    | 403073101            | ,000             | ,000  | ,000  | ,000  |
|                              | 403073102            | ,000             | ,000  | ,000  | ,000  |
|                              | 403073103            | ,000             | ,000  | ,000  | ,000  |
|                              | 403073202            | ,000             | ,000  | ,000  | ,000  |
|                              | 403073203            | ,000             | ,000  | ,000  | ,000  |
|                              | 403073204            | ,000             | ,000  | ,000  | ,000  |
|                              | 403073303            | ,000             | ,000  | ,000  | ,000  |
|                              | 403073651            | ,000             | ,000  | ,000  | ,000  |
|                              | 403073771            | ,000             | ,000  | ,000  | ,000  |
|                              | 403133102            | ,000             | ,000  | ,000  | ,000  |
|                              | 403133106            | ,000             | ,000  | ,000  | ,000  |
|                              | 403133107            | ,000             | ,000  | ,000  | ,000  |
|                              | 403133109            | ,000             | ,000  | ,000  | ,000  |
|                              | 403133202            | ,000             | ,000  | ,000  | ,000  |
|                              | 403133203            | ,000             | ,000  | ,000  | ,000  |
|                              | 403133204            | ,000             | ,000  | ,000  | ,000  |
|                              | 403133315            | ,000             | ,000  | ,000  | ,000  |
|                              | 403133322            | ,000             | ,000  | ,000  | ,000  |
|                              | 403133401            | ,000             | ,000  | ,000  | ,000  |
|                              | 403133402            | ,000             | ,000  | ,000  | ,000  |
|                              | 403133550            | ,000             | ,000  | ,000  | ,000  |
|                              | 403133772            | ,000             | ,000  | ,000  | ,000  |
|                              | 403135803            | ,000             | ,000  | ,000  | ,000  |
|                              | 404060001            | ,000             | ,000  | ,000  | ,000  |
|                              | 404060002            | 1,000            | ,000  | ,000  | ,000  |
|                              | 404310003            | ,000             | 1,000 | ,000  | ,000  |
|                              | 404310004            | ,000             | ,000  | 1,000 | ,000  |
|                              | 502300005            | ,000             | ,000  | ,000  | 1,000 |
|                              | 502300006            | ,000             | ,000  | ,000  | ,000  |
|                              | 502300007            | ,000             | ,000  | ,000  | ,000  |
|                              | 502300214            | ,000             | ,000  | ,000  | ,000  |
|                              | 502300411            | ,000             | ,000  | ,000  | ,000  |
|                              | 502300415            | ,000             | ,000  | ,000  | ,000  |
|                              | 502300416            | ,000             | ,000  | ,000  | ,000  |
|                              | 502300811            | ,000             | ,000  | ,000  | ,000  |
|                              | 502300913            | ,000             | ,000  | ,000  | ,000  |
| sv3 tredjedelar för standard | 1 andra tredjedelen  |                  |       |       |       |
|                              | 2 första tredjedelen |                  |       |       |       |
|                              | 3 tredje tredjedelen |                  |       |       |       |

## Categorical Variables Codings

|                              |                      | Parameter coding |       |       |       |
|------------------------------|----------------------|------------------|-------|-------|-------|
|                              |                      | (28)             | (29)  | (30)  | (31)  |
| VASTY2 (SAIR*10000)+VASTY    | 403073101            | ,000             | ,000  | ,000  | ,000  |
|                              | 403073102            | ,000             | ,000  | ,000  | ,000  |
|                              | 403073103            | ,000             | ,000  | ,000  | ,000  |
|                              | 403073202            | ,000             | ,000  | ,000  | ,000  |
|                              | 403073203            | ,000             | ,000  | ,000  | ,000  |
|                              | 403073204            | ,000             | ,000  | ,000  | ,000  |
|                              | 403073303            | ,000             | ,000  | ,000  | ,000  |
|                              | 403073651            | ,000             | ,000  | ,000  | ,000  |
|                              | 403073771            | ,000             | ,000  | ,000  | ,000  |
|                              | 403133102            | ,000             | ,000  | ,000  | ,000  |
|                              | 403133106            | ,000             | ,000  | ,000  | ,000  |
|                              | 403133107            | ,000             | ,000  | ,000  | ,000  |
|                              | 403133109            | ,000             | ,000  | ,000  | ,000  |
|                              | 403133202            | ,000             | ,000  | ,000  | ,000  |
|                              | 403133203            | ,000             | ,000  | ,000  | ,000  |
|                              | 403133204            | ,000             | ,000  | ,000  | ,000  |
|                              | 403133315            | ,000             | ,000  | ,000  | ,000  |
|                              | 403133322            | ,000             | ,000  | ,000  | ,000  |
|                              | 403133401            | ,000             | ,000  | ,000  | ,000  |
|                              | 403133402            | ,000             | ,000  | ,000  | ,000  |
|                              | 403133550            | ,000             | ,000  | ,000  | ,000  |
|                              | 403133772            | ,000             | ,000  | ,000  | ,000  |
|                              | 403135803            | ,000             | ,000  | ,000  | ,000  |
|                              | 404060001            | ,000             | ,000  | ,000  | ,000  |
|                              | 404060002            | ,000             | ,000  | ,000  | ,000  |
|                              | 404310003            | ,000             | ,000  | ,000  | ,000  |
|                              | 404310004            | ,000             | ,000  | ,000  | ,000  |
|                              | 502300005            | ,000             | ,000  | ,000  | ,000  |
|                              | 502300006            | 1,000            | ,000  | ,000  | ,000  |
|                              | 502300007            | ,000             | 1,000 | ,000  | ,000  |
|                              | 502300214            | ,000             | ,000  | 1,000 | ,000  |
|                              | 502300411            | ,000             | ,000  | ,000  | 1,000 |
|                              | 502300415            | ,000             | ,000  | ,000  | ,000  |
|                              | 502300416            | ,000             | ,000  | ,000  | ,000  |
|                              | 502300811            | ,000             | ,000  | ,000  | ,000  |
|                              | 502300913            | ,000             | ,000  | ,000  | ,000  |
| sv3 tredjedelar för standard | 1 andra tredjedelen  |                  |       |       |       |
|                              | 2 första tredjedelen |                  |       |       |       |
|                              | 3 tredje tredjedelen |                  |       |       |       |

## Categorical Variables Codings

|                              |                      | Parameter coding |       |       |       |
|------------------------------|----------------------|------------------|-------|-------|-------|
|                              |                      | (32)             | (33)  | (34)  | (35)  |
| VASTY2 (SAIR*10000)+VASTY    | 403073101            | ,000             | ,000  | ,000  | ,000  |
|                              | 403073102            | ,000             | ,000  | ,000  | ,000  |
|                              | 403073103            | ,000             | ,000  | ,000  | ,000  |
|                              | 403073202            | ,000             | ,000  | ,000  | ,000  |
|                              | 403073203            | ,000             | ,000  | ,000  | ,000  |
|                              | 403073204            | ,000             | ,000  | ,000  | ,000  |
|                              | 403073303            | ,000             | ,000  | ,000  | ,000  |
|                              | 403073651            | ,000             | ,000  | ,000  | ,000  |
|                              | 403073771            | ,000             | ,000  | ,000  | ,000  |
|                              | 403133102            | ,000             | ,000  | ,000  | ,000  |
|                              | 403133106            | ,000             | ,000  | ,000  | ,000  |
|                              | 403133107            | ,000             | ,000  | ,000  | ,000  |
|                              | 403133109            | ,000             | ,000  | ,000  | ,000  |
|                              | 403133202            | ,000             | ,000  | ,000  | ,000  |
|                              | 403133203            | ,000             | ,000  | ,000  | ,000  |
|                              | 403133204            | ,000             | ,000  | ,000  | ,000  |
|                              | 403133315            | ,000             | ,000  | ,000  | ,000  |
|                              | 403133322            | ,000             | ,000  | ,000  | ,000  |
|                              | 403133401            | ,000             | ,000  | ,000  | ,000  |
|                              | 403133402            | ,000             | ,000  | ,000  | ,000  |
|                              | 403133550            | ,000             | ,000  | ,000  | ,000  |
|                              | 403133772            | ,000             | ,000  | ,000  | ,000  |
|                              | 403135803            | ,000             | ,000  | ,000  | ,000  |
|                              | 404060001            | ,000             | ,000  | ,000  | ,000  |
|                              | 404060002            | ,000             | ,000  | ,000  | ,000  |
|                              | 404310003            | ,000             | ,000  | ,000  | ,000  |
|                              | 404310004            | ,000             | ,000  | ,000  | ,000  |
|                              | 502300005            | ,000             | ,000  | ,000  | ,000  |
|                              | 502300006            | ,000             | ,000  | ,000  | ,000  |
|                              | 502300007            | ,000             | ,000  | ,000  | ,000  |
|                              | 502300214            | ,000             | ,000  | ,000  | ,000  |
|                              | 502300411            | ,000             | ,000  | ,000  | ,000  |
|                              | 502300415            | 1,000            | ,000  | ,000  | ,000  |
|                              | 502300416            | ,000             | 1,000 | ,000  | ,000  |
|                              | 502300811            | ,000             | ,000  | 1,000 | ,000  |
|                              | 502300913            | ,000             | ,000  | ,000  | 1,000 |
| sv3 tredjedelar för standard | 1 andra tredjedelen  |                  |       |       |       |
|                              | 2 första tredjedelen |                  |       |       |       |
|                              | 3 tredje tredjedelen |                  |       |       |       |

**Block 0: Beginning Block**

Classification Table<sup>a,b</sup>

| Observed           |                              |                     | Predicted        |                     |
|--------------------|------------------------------|---------------------|------------------|---------------------|
|                    |                              |                     | 0 ingen händelse | 1 minst en händelse |
| Step 0             | hand01 händelse nej eller ja | 0 ingen händelse    | 11108            | 0                   |
|                    |                              | 1 minst en händelse | 1367             | 0                   |
| Overall Percentage |                              |                     |                  |                     |

Classification Table<sup>a,b</sup>

| Observed           |                              |                     | Predicted          |
|--------------------|------------------------------|---------------------|--------------------|
|                    |                              |                     | Percentage Correct |
| Step 0             | hand01 händelse nej eller ja | 0 ingen händelse    | 100,0              |
|                    |                              | 1 minst en händelse | ,0                 |
| Overall Percentage |                              |                     | 89,0               |

a. Constant is included in the model.

b. The cut value is ,500

Variables in the Equation

|                 | B      | S.E. | Wald     | df | Sig. | Exp(B) |
|-----------------|--------|------|----------|----|------|--------|
| Step 0 Constant | -2,095 | ,029 | 5342,584 | 1  | ,000 | ,123   |

## Variables not in the Equation

|        |                    |            | Score   | df | Sig. |
|--------|--------------------|------------|---------|----|------|
| Step 0 | Variables          | sv3        | 33,743  | 2  | ,000 |
|        |                    | sv3(1)     | 32,193  | 1  | ,000 |
|        |                    | sv3(2)     | 19,134  | 1  | ,000 |
|        |                    | VASTY2     | 541,214 | 35 | ,000 |
|        |                    | VASTY2(1)  | 1,169   | 1  | ,280 |
|        |                    | VASTY2(2)  | 87,511  | 1  | ,000 |
|        |                    | VASTY2(3)  | 13,995  | 1  | ,000 |
|        |                    | VASTY2(4)  | ,464    | 1  | ,496 |
|        |                    | VASTY2(5)  | 5,526   | 1  | ,019 |
|        |                    | VASTY2(6)  | 19,435  | 1  | ,000 |
|        |                    | VASTY2(7)  | 86,074  | 1  | ,000 |
|        |                    | VASTY2(8)  | 1,043   | 1  | ,307 |
|        |                    | VASTY2(9)  | ,408    | 1  | ,523 |
|        |                    | VASTY2(10) | 58,583  | 1  | ,000 |
|        |                    | VASTY2(11) | 33,445  | 1  | ,000 |
|        |                    | VASTY2(12) | ,029    | 1  | ,865 |
|        |                    | VASTY2(13) | 33,445  | 1  | ,000 |
|        |                    | VASTY2(14) | 4,163   | 1  | ,041 |
|        |                    | VASTY2(15) | ,464    | 1  | ,496 |
|        |                    | VASTY2(16) | ,763    | 1  | ,382 |
|        |                    | VASTY2(17) | 24,320  | 1  | ,000 |
|        |                    | VASTY2(18) | 17,742  | 1  | ,000 |
|        |                    | VASTY2(19) | 27,791  | 1  | ,000 |
|        |                    | VASTY2(20) | ,015    | 1  | ,902 |
|        |                    | VASTY2(21) | 2,890   | 1  | ,089 |
|        |                    | VASTY2(22) | ,462    | 1  | ,497 |
|        |                    | VASTY2(23) | 15,306  | 1  | ,000 |
|        |                    | VASTY2(24) | 12,594  | 1  | ,000 |
|        |                    | VASTY2(25) | ,128    | 1  | ,720 |
|        |                    | VASTY2(26) | 12,864  | 1  | ,000 |
|        |                    | VASTY2(27) | 24,439  | 1  | ,000 |
|        |                    | VASTY2(28) | 9,963   | 1  | ,002 |
|        |                    | VASTY2(29) | 18,184  | 1  | ,000 |
|        |                    | VASTY2(30) | ,486    | 1  | ,486 |
|        |                    | VASTY2(31) | 6,400   | 1  | ,011 |
|        |                    | VASTY2(32) | 1,626   | 1  | ,202 |
|        |                    | VASTY2(33) | 1,336   | 1  | ,248 |
|        |                    | VASTY2(34) | 29,489  | 1  | ,000 |
|        |                    | VASTY2(35) | 3,668   | 1  | ,055 |
|        | Overall Statistics |            | 552,764 | 37 | ,000 |

**Block 1: Method = Enter**

## Omnibus Tests of Model Coefficients

|        |       | Chi-square | df | Sig. |
|--------|-------|------------|----|------|
| Step 1 | Step  | 550,088    | 37 | ,000 |
|        | Block | 550,088    | 37 | ,000 |
|        | Model | 550,088    | 37 | ,000 |

## Model Summary

| Step | -2 Log likelihood     | Cox & Snell R Square | Nagelkerke R Square |
|------|-----------------------|----------------------|---------------------|
| 1    | 8073,494 <sup>a</sup> | ,043                 | ,086                |

a. Estimation terminated at iteration number 6 because parameter estimates changed by less than ,001.

Classification Table<sup>a</sup>

|                    |                              | Predicted                    |                     |
|--------------------|------------------------------|------------------------------|---------------------|
|                    |                              | hand01 händelse nej eller ja |                     |
| Observed           |                              | 0 ingen händelse             | 1 minst en händelse |
| Step 1             | hand01 händelse nej eller ja | 11108                        | 0                   |
|                    |                              | 1367                         | 0                   |
| Overall Percentage |                              |                              |                     |

Classification Table<sup>a</sup>

| Observed           |                              | Predicted          |
|--------------------|------------------------------|--------------------|
|                    |                              | Percentage Correct |
| Step 1             | hand01 händelse nej eller ja | 100,0              |
|                    |                              | ,0                 |
| Overall Percentage |                              | 89,0               |

a. The cut value is ,500

## Variables in the Equation

|                         | B      | S.E. | Wald    | df | Sig. | Exp(B) |
|-------------------------|--------|------|---------|----|------|--------|
| Step 1 <sup>a</sup> sv3 |        |      | 11,508  | 2  | ,003 |        |
| sv3(1)                  | -,161  | ,085 | 3,579   | 1  | ,059 | ,851   |
| sv3(2)                  | ,150   | ,083 | 3,287   | 1  | ,070 | 1,162  |
| VASTY2                  |        |      | 430,840 | 35 | ,000 |        |
| VASTY2(1)               | ,306   | ,240 | 1,621   | 1  | ,203 | 1,358  |
| VASTY2(2)               | 1,125  | ,219 | 26,358  | 1  | ,000 | 3,081  |
| VASTY2(3)               | -,648  | ,302 | 4,609   | 1  | ,032 | ,523   |
| VASTY2(4)               | ,318   | ,242 | 1,726   | 1  | ,189 | 1,374  |
| VASTY2(5)               | -,228  | ,283 | ,652    | 1  | ,419 | ,796   |
| VASTY2(6)               | -1,074 | ,330 | 10,579  | 1  | ,001 | ,342   |
| VASTY2(7)               | 1,262  | ,217 | 33,909  | 1  | ,000 | 3,534  |
| VASTY2(8)               | ,400   | ,240 | 2,777   | 1  | ,096 | 1,492  |
| VASTY2(9)               | ,285   | ,245 | 1,350   | 1  | ,245 | 1,330  |
| VASTY2(10)              | ,957   | ,223 | 18,428  | 1  | ,000 | 2,605  |
| VASTY2(11)              | ,916   | ,222 | 16,937  | 1  | ,000 | 2,498  |
| VASTY2(12)              | ,048   | ,250 | ,037    | 1  | ,847 | 1,049  |
| VASTY2(13)              | ,773   | ,227 | 11,569  | 1  | ,001 | 2,165  |
| VASTY2(14)              | -,288  | ,268 | 1,154   | 1  | ,283 | ,750   |
| VASTY2(15)              | ,181   | ,245 | ,545    | 1  | ,460 | 1,198  |
| VASTY2(16)              | ,364   | ,288 | 1,601   | 1  | ,206 | 1,440  |
| VASTY2(17)              | -1,150 | ,356 | 10,442  | 1  | ,001 | ,317   |
| VASTY2(18)              | -,708  | ,325 | 4,757   | 1  | ,029 | ,493   |
| VASTY2(19)              | -1,244 | ,387 | 10,321  | 1  | ,001 | ,288   |
| VASTY2(20)              | ,090   | ,261 | ,118    | 1  | ,731 | 1,094  |
| VASTY2(21)              | -,091  | ,263 | ,121    | 1  | ,728 | ,913   |
| VASTY2(22)              | ,062   | ,252 | ,061    | 1  | ,804 | 1,064  |
| VASTY2(23)              | ,736   | ,228 | 10,476  | 1  | ,001 | 2,089  |
| VASTY2(24)              | ,621   | ,229 | 7,361   | 1  | ,007 | 1,861  |
| VASTY2(25)              | ,178   | ,265 | ,452    | 1  | ,502 | 1,195  |
| VASTY2(26)              | -,800  | ,336 | 5,652   | 1  | ,017 | ,450   |
| VASTY2(27)              | -1,284 | ,357 | 12,956  | 1  | ,000 | ,277   |
| VASTY2(28)              | -,941  | ,374 | 6,328   | 1  | ,012 | ,390   |
| VASTY2(29)              | -1,029 | ,324 | 10,101  | 1  | ,001 | ,357   |
| VASTY2(30)              | ,127   | ,253 | ,251    | 1  | ,616 | 1,135  |
| VASTY2(31)              | ,684   | ,238 | 8,295   | 1  | ,004 | 1,983  |
| VASTY2(32)              | ,107   | ,265 | ,163    | 1  | ,687 | 1,113  |
| VASTY2(33)              | ,132   | ,263 | ,250    | 1  | ,617 | 1,141  |
| VASTY2(34)              | -1,514 | ,400 | 14,299  | 1  | ,000 | ,220   |
| VASTY2(35)              | ,470   | ,242 | 3,770   | 1  | ,052 | 1,601  |
| Constant                | -2,273 | ,184 | 152,586 | 1  | ,000 | ,103   |



## Variables in the Equation

|                     |            | 95% C.I. for EXP(B) |       |
|---------------------|------------|---------------------|-------|
|                     |            | Lower               | Upper |
| Step 1 <sup>a</sup> | sv3        |                     |       |
|                     | sv3(1)     | ,720                | 1,006 |
|                     | sv3(2)     | ,988                | 1,367 |
|                     | VASTY2     |                     |       |
|                     | VASTY2(1)  | ,848                | 2,176 |
|                     | VASTY2(2)  | 2,005               | 4,734 |
|                     | VASTY2(3)  | ,290                | ,945  |
|                     | VASTY2(4)  | ,855                | 2,207 |
|                     | VASTY2(5)  | ,457                | 1,385 |
|                     | VASTY2(6)  | ,179                | ,653  |
|                     | VASTY2(7)  | 2,311               | 5,405 |
|                     | VASTY2(8)  | ,932                | 2,390 |
|                     | VASTY2(9)  | ,822                | 2,152 |
|                     | VASTY2(10) | 1,682               | 4,032 |
|                     | VASTY2(11) | 1,615               | 3,863 |
|                     | VASTY2(12) | ,643                | 1,712 |
|                     | VASTY2(13) | 1,387               | 3,379 |
|                     | VASTY2(14) | ,443                | 1,268 |
|                     | VASTY2(15) | ,742                | 1,934 |
|                     | VASTY2(16) | ,819                | 2,531 |
|                     | VASTY2(17) | ,158                | ,636  |
|                     | VASTY2(18) | ,261                | ,931  |
|                     | VASTY2(19) | ,135                | ,616  |
|                     | VASTY2(20) | ,656                | 1,825 |
|                     | VASTY2(21) | ,545                | 1,527 |
|                     | VASTY2(22) | ,650                | 1,743 |
|                     | VASTY2(23) | 1,337               | 3,262 |
|                     | VASTY2(24) | 1,188               | 2,915 |
|                     | VASTY2(25) | ,711                | 2,007 |
|                     | VASTY2(26) | ,233                | ,869  |
|                     | VASTY2(27) | ,138                | ,557  |
|                     | VASTY2(28) | ,188                | ,812  |
|                     | VASTY2(29) | ,189                | ,674  |
|                     | VASTY2(30) | ,692                | 1,862 |
|                     | VASTY2(31) | 1,244               | 3,159 |
|                     | VASTY2(32) | ,662                | 1,870 |
|                     | VASTY2(33) | ,681                | 1,910 |
|                     | VASTY2(34) | ,100                | ,482  |
|                     | VASTY2(35) | ,996                | 2,574 |
|                     | Constant   |                     |       |

a. Variable(s) entered on step 1: sv3, VASTY2.

```

1
2
3 LOGISTIC REGRESSION VARIABLES hand01
4   /METHOD=ENTER sv5 VASTY2
5   /CONTRAST (sv5)=Indicator(1)
6   /CONTRAST (VASTY2)=Indicator(1)
7   /PRINT=CI(95)
8   /CRITERIA=PIN(0.05) POUT(0.10) ITERATE(20) CUT(0.5).
9
10
11

```

## Logistic Regression

[DataSet6] C:\cWordjan\Rafaela\_VCS\alla\_tillsammans\abo\_bjo\_vasa\_v1.sav

### Case Processing Summary

| Unweighted Cases <sup>a</sup> |                      | N     | Percent |
|-------------------------------|----------------------|-------|---------|
| Selected Cases                | Included in Analysis | 12475 | 100,0   |
|                               | Missing Cases        | 0     | ,0      |
|                               | Total                | 12475 | 100,0   |
| Unselected Cases              |                      | 0     | ,0      |
| Total                         |                      | 12475 | 100,0   |

a. If weight is in effect, see classification table for the total number of cases.

### Dependent Variable Encoding

| Original Value      | Internal Value |
|---------------------|----------------|
| 0 ingen händelse    | 0              |
| 1 minst en händelse | 1              |

## Categorical Variables Codings

|                                               | Frequency | Parameter coding |       |       |
|-----------------------------------------------|-----------|------------------|-------|-------|
|                                               |           | (1)              | (2)   | (3)   |
| VASTY2 (SAIR*10000)+VASTY 403073101           | 365       | ,000             | ,000  | ,000  |
| 403073102                                     | 362       | 1,000            | ,000  | ,000  |
| 403073103                                     | 365       | ,000             | 1,000 | ,000  |
| 403073202                                     | 365       | ,000             | ,000  | 1,000 |
| 403073203                                     | 365       | ,000             | ,000  | ,000  |
| 403073204                                     | 330       | ,000             | ,000  | ,000  |
| 403073303                                     | 364       | ,000             | ,000  | ,000  |
| 403073651                                     | 362       | ,000             | ,000  | ,000  |
| 403073771                                     | 365       | ,000             | ,000  | ,000  |
| 403133102                                     | 341       | ,000             | ,000  | ,000  |
| 403133106                                     | 365       | ,000             | ,000  | ,000  |
| 403133107                                     | 365       | ,000             | ,000  | ,000  |
| 403133109                                     | 365       | ,000             | ,000  | ,000  |
| 403133202                                     | 365       | ,000             | ,000  | ,000  |
| 403133203                                     | 365       | ,000             | ,000  | ,000  |
| 403133204                                     | 365       | ,000             | ,000  | ,000  |
| 403133315                                     | 177       | ,000             | ,000  | ,000  |
| 403133322                                     | 365       | ,000             | ,000  | ,000  |
| 403133401                                     | 362       | ,000             | ,000  | ,000  |
| 403133402                                     | 365       | ,000             | ,000  | ,000  |
| 403133550                                     | 298       | ,000             | ,000  | ,000  |
| 403133772                                     | 365       | ,000             | ,000  | ,000  |
| 403135803                                     | 365       | ,000             | ,000  | ,000  |
| 404060001                                     | 365       | ,000             | ,000  | ,000  |
| 404060002                                     | 366       | ,000             | ,000  | ,000  |
| 404310003                                     | 291       | ,000             | ,000  | ,000  |
| 404310004                                     | 291       | ,000             | ,000  | ,000  |
| 502300005                                     | 366       | ,000             | ,000  | ,000  |
| 502300006                                     | 225       | ,000             | ,000  | ,000  |
| 502300007                                     | 366       | ,000             | ,000  | ,000  |
| 502300214                                     | 366       | ,000             | ,000  | ,000  |
| 502300411                                     | 366       | ,000             | ,000  | ,000  |
| 502300415                                     | 360       | ,000             | ,000  | ,000  |
| 502300416                                     | 363       | ,000             | ,000  | ,000  |
| 502300811                                     | 364       | ,000             | ,000  | ,000  |
| 502300913                                     | 315       | ,000             | ,000  | ,000  |
| sv5 kvintiler för standard 1 tredje kvintilen | 1863      | ,000             | ,000  | ,000  |
| 2 första kvintilen                            | 3570      | 1,000            | ,000  | ,000  |
| 3 andra kvintilen                             | 1759      | ,000             | 1,000 | ,000  |
| 4 fjärde kvintilen                            | 2327      | ,000             | ,000  | 1,000 |
| 5 femte kvintilen                             | 2956      | ,000             | ,000  | ,000  |

## Categorical Variables Codings

|                            |                    | Parameter coding |       |       |       |
|----------------------------|--------------------|------------------|-------|-------|-------|
|                            |                    | (4)              | (5)   | (6)   | (7)   |
| VASTY2 (SAIR*10000)+VASTY  | 403073101          | ,000             | ,000  | ,000  | ,000  |
|                            | 403073102          | ,000             | ,000  | ,000  | ,000  |
|                            | 403073103          | ,000             | ,000  | ,000  | ,000  |
|                            | 403073202          | ,000             | ,000  | ,000  | ,000  |
|                            | 403073203          | 1,000            | ,000  | ,000  | ,000  |
|                            | 403073204          | ,000             | 1,000 | ,000  | ,000  |
|                            | 403073303          | ,000             | ,000  | 1,000 | ,000  |
|                            | 403073651          | ,000             | ,000  | ,000  | 1,000 |
|                            | 403073771          | ,000             | ,000  | ,000  | ,000  |
|                            | 403133102          | ,000             | ,000  | ,000  | ,000  |
|                            | 403133106          | ,000             | ,000  | ,000  | ,000  |
|                            | 403133107          | ,000             | ,000  | ,000  | ,000  |
|                            | 403133109          | ,000             | ,000  | ,000  | ,000  |
|                            | 403133202          | ,000             | ,000  | ,000  | ,000  |
|                            | 403133203          | ,000             | ,000  | ,000  | ,000  |
|                            | 403133204          | ,000             | ,000  | ,000  | ,000  |
|                            | 403133315          | ,000             | ,000  | ,000  | ,000  |
|                            | 403133322          | ,000             | ,000  | ,000  | ,000  |
|                            | 403133401          | ,000             | ,000  | ,000  | ,000  |
|                            | 403133402          | ,000             | ,000  | ,000  | ,000  |
|                            | 403133550          | ,000             | ,000  | ,000  | ,000  |
|                            | 403133772          | ,000             | ,000  | ,000  | ,000  |
|                            | 403135803          | ,000             | ,000  | ,000  | ,000  |
|                            | 404060001          | ,000             | ,000  | ,000  | ,000  |
|                            | 404060002          | ,000             | ,000  | ,000  | ,000  |
|                            | 404310003          | ,000             | ,000  | ,000  | ,000  |
|                            | 404310004          | ,000             | ,000  | ,000  | ,000  |
|                            | 502300005          | ,000             | ,000  | ,000  | ,000  |
|                            | 502300006          | ,000             | ,000  | ,000  | ,000  |
|                            | 502300007          | ,000             | ,000  | ,000  | ,000  |
|                            | 502300214          | ,000             | ,000  | ,000  | ,000  |
|                            | 502300411          | ,000             | ,000  | ,000  | ,000  |
|                            | 502300415          | ,000             | ,000  | ,000  | ,000  |
|                            | 502300416          | ,000             | ,000  | ,000  | ,000  |
|                            | 502300811          | ,000             | ,000  | ,000  | ,000  |
|                            | 502300913          | ,000             | ,000  | ,000  | ,000  |
| sv5 kvintiler för standard | 1 tredje kvintilen | ,000             |       |       |       |
|                            | 2 första kvintilen | ,000             |       |       |       |
|                            | 3 andra kvintilen  | ,000             |       |       |       |
|                            | 4 fjärde kvintilen | ,000             |       |       |       |
|                            | 5 femte kvintilen  | 1,000            |       |       |       |

## Categorical Variables Codings

|                            |                    | Parameter coding |       |       |       |
|----------------------------|--------------------|------------------|-------|-------|-------|
|                            |                    | (8)              | (9)   | (10)  | (11)  |
| VASTY2 (SAIR*10000)+VASTY  | 403073101          | ,000             | ,000  | ,000  | ,000  |
|                            | 403073102          | ,000             | ,000  | ,000  | ,000  |
|                            | 403073103          | ,000             | ,000  | ,000  | ,000  |
|                            | 403073202          | ,000             | ,000  | ,000  | ,000  |
|                            | 403073203          | ,000             | ,000  | ,000  | ,000  |
|                            | 403073204          | ,000             | ,000  | ,000  | ,000  |
|                            | 403073303          | ,000             | ,000  | ,000  | ,000  |
|                            | 403073651          | ,000             | ,000  | ,000  | ,000  |
|                            | 403073771          | 1,000            | ,000  | ,000  | ,000  |
|                            | 403133102          | ,000             | 1,000 | ,000  | ,000  |
|                            | 403133106          | ,000             | ,000  | 1,000 | ,000  |
|                            | 403133107          | ,000             | ,000  | ,000  | 1,000 |
|                            | 403133109          | ,000             | ,000  | ,000  | ,000  |
|                            | 403133202          | ,000             | ,000  | ,000  | ,000  |
|                            | 403133203          | ,000             | ,000  | ,000  | ,000  |
|                            | 403133204          | ,000             | ,000  | ,000  | ,000  |
|                            | 403133315          | ,000             | ,000  | ,000  | ,000  |
|                            | 403133322          | ,000             | ,000  | ,000  | ,000  |
|                            | 403133401          | ,000             | ,000  | ,000  | ,000  |
|                            | 403133402          | ,000             | ,000  | ,000  | ,000  |
|                            | 403133550          | ,000             | ,000  | ,000  | ,000  |
|                            | 403133772          | ,000             | ,000  | ,000  | ,000  |
|                            | 403135803          | ,000             | ,000  | ,000  | ,000  |
|                            | 404060001          | ,000             | ,000  | ,000  | ,000  |
|                            | 404060002          | ,000             | ,000  | ,000  | ,000  |
|                            | 404310003          | ,000             | ,000  | ,000  | ,000  |
|                            | 404310004          | ,000             | ,000  | ,000  | ,000  |
|                            | 502300005          | ,000             | ,000  | ,000  | ,000  |
|                            | 502300006          | ,000             | ,000  | ,000  | ,000  |
|                            | 502300007          | ,000             | ,000  | ,000  | ,000  |
|                            | 502300214          | ,000             | ,000  | ,000  | ,000  |
|                            | 502300411          | ,000             | ,000  | ,000  | ,000  |
|                            | 502300415          | ,000             | ,000  | ,000  | ,000  |
|                            | 502300416          | ,000             | ,000  | ,000  | ,000  |
|                            | 502300811          | ,000             | ,000  | ,000  | ,000  |
|                            | 502300913          | ,000             | ,000  | ,000  | ,000  |
| sv5 kvintiler för standard | 1 tredje kvintilen |                  |       |       |       |
|                            | 2 första kvintilen |                  |       |       |       |
|                            | 3 andra kvintilen  |                  |       |       |       |
|                            | 4 fjärde kvintilen |                  |       |       |       |
|                            | 5 femte kvintilen  |                  |       |       |       |

## Categorical Variables Codings

|                            |                    | Parameter coding |       |       |       |
|----------------------------|--------------------|------------------|-------|-------|-------|
|                            |                    | (12)             | (13)  | (14)  | (15)  |
| VASTY2 (SAIR*10000)+VASTY  | 403073101          | ,000             | ,000  | ,000  | ,000  |
|                            | 403073102          | ,000             | ,000  | ,000  | ,000  |
|                            | 403073103          | ,000             | ,000  | ,000  | ,000  |
|                            | 403073202          | ,000             | ,000  | ,000  | ,000  |
|                            | 403073203          | ,000             | ,000  | ,000  | ,000  |
|                            | 403073204          | ,000             | ,000  | ,000  | ,000  |
|                            | 403073303          | ,000             | ,000  | ,000  | ,000  |
|                            | 403073651          | ,000             | ,000  | ,000  | ,000  |
|                            | 403073771          | ,000             | ,000  | ,000  | ,000  |
|                            | 403133102          | ,000             | ,000  | ,000  | ,000  |
|                            | 403133106          | ,000             | ,000  | ,000  | ,000  |
|                            | 403133107          | ,000             | ,000  | ,000  | ,000  |
|                            | 403133109          | 1,000            | ,000  | ,000  | ,000  |
|                            | 403133202          | ,000             | 1,000 | ,000  | ,000  |
|                            | 403133203          | ,000             | ,000  | 1,000 | ,000  |
|                            | 403133204          | ,000             | ,000  | ,000  | 1,000 |
|                            | 403133315          | ,000             | ,000  | ,000  | ,000  |
|                            | 403133322          | ,000             | ,000  | ,000  | ,000  |
|                            | 403133401          | ,000             | ,000  | ,000  | ,000  |
|                            | 403133402          | ,000             | ,000  | ,000  | ,000  |
|                            | 403133550          | ,000             | ,000  | ,000  | ,000  |
|                            | 403133772          | ,000             | ,000  | ,000  | ,000  |
|                            | 403135803          | ,000             | ,000  | ,000  | ,000  |
|                            | 404060001          | ,000             | ,000  | ,000  | ,000  |
|                            | 404060002          | ,000             | ,000  | ,000  | ,000  |
|                            | 404310003          | ,000             | ,000  | ,000  | ,000  |
|                            | 404310004          | ,000             | ,000  | ,000  | ,000  |
|                            | 502300005          | ,000             | ,000  | ,000  | ,000  |
|                            | 502300006          | ,000             | ,000  | ,000  | ,000  |
|                            | 502300007          | ,000             | ,000  | ,000  | ,000  |
|                            | 502300214          | ,000             | ,000  | ,000  | ,000  |
|                            | 502300411          | ,000             | ,000  | ,000  | ,000  |
|                            | 502300415          | ,000             | ,000  | ,000  | ,000  |
|                            | 502300416          | ,000             | ,000  | ,000  | ,000  |
|                            | 502300811          | ,000             | ,000  | ,000  | ,000  |
|                            | 502300913          | ,000             | ,000  | ,000  | ,000  |
| sv5 kvintiler för standard | 1 tredje kvintilen |                  |       |       |       |
|                            | 2 första kvintilen |                  |       |       |       |
|                            | 3 andra kvintilen  |                  |       |       |       |
|                            | 4 fjärde kvintilen |                  |       |       |       |
|                            | 5 femte kvintilen  |                  |       |       |       |

## Categorical Variables Codings

|                            |                    | Parameter coding |       |       |       |
|----------------------------|--------------------|------------------|-------|-------|-------|
|                            |                    | (16)             | (17)  | (18)  | (19)  |
| VASTY2 (SAIR*10000)+VASTY  | 403073101          | ,000             | ,000  | ,000  | ,000  |
|                            | 403073102          | ,000             | ,000  | ,000  | ,000  |
|                            | 403073103          | ,000             | ,000  | ,000  | ,000  |
|                            | 403073202          | ,000             | ,000  | ,000  | ,000  |
|                            | 403073203          | ,000             | ,000  | ,000  | ,000  |
|                            | 403073204          | ,000             | ,000  | ,000  | ,000  |
|                            | 403073303          | ,000             | ,000  | ,000  | ,000  |
|                            | 403073651          | ,000             | ,000  | ,000  | ,000  |
|                            | 403073771          | ,000             | ,000  | ,000  | ,000  |
|                            | 403133102          | ,000             | ,000  | ,000  | ,000  |
|                            | 403133106          | ,000             | ,000  | ,000  | ,000  |
|                            | 403133107          | ,000             | ,000  | ,000  | ,000  |
|                            | 403133109          | ,000             | ,000  | ,000  | ,000  |
|                            | 403133202          | ,000             | ,000  | ,000  | ,000  |
|                            | 403133203          | ,000             | ,000  | ,000  | ,000  |
|                            | 403133204          | ,000             | ,000  | ,000  | ,000  |
|                            | 403133315          | 1,000            | ,000  | ,000  | ,000  |
|                            | 403133322          | ,000             | 1,000 | ,000  | ,000  |
|                            | 403133401          | ,000             | ,000  | 1,000 | ,000  |
|                            | 403133402          | ,000             | ,000  | ,000  | 1,000 |
|                            | 403133550          | ,000             | ,000  | ,000  | ,000  |
|                            | 403133772          | ,000             | ,000  | ,000  | ,000  |
|                            | 403135803          | ,000             | ,000  | ,000  | ,000  |
|                            | 404060001          | ,000             | ,000  | ,000  | ,000  |
|                            | 404060002          | ,000             | ,000  | ,000  | ,000  |
|                            | 404310003          | ,000             | ,000  | ,000  | ,000  |
|                            | 404310004          | ,000             | ,000  | ,000  | ,000  |
|                            | 502300005          | ,000             | ,000  | ,000  | ,000  |
|                            | 502300006          | ,000             | ,000  | ,000  | ,000  |
|                            | 502300007          | ,000             | ,000  | ,000  | ,000  |
|                            | 502300214          | ,000             | ,000  | ,000  | ,000  |
|                            | 502300411          | ,000             | ,000  | ,000  | ,000  |
|                            | 502300415          | ,000             | ,000  | ,000  | ,000  |
|                            | 502300416          | ,000             | ,000  | ,000  | ,000  |
|                            | 502300811          | ,000             | ,000  | ,000  | ,000  |
|                            | 502300913          | ,000             | ,000  | ,000  | ,000  |
| sv5 kvintiler för standard | 1 tredje kvintilen |                  |       |       |       |
|                            | 2 första kvintilen |                  |       |       |       |
|                            | 3 andra kvintilen  |                  |       |       |       |
|                            | 4 fjärde kvintilen |                  |       |       |       |
|                            | 5 femte kvintilen  |                  |       |       |       |

## Categorical Variables Codings

|                            |                    | Parameter coding |       |       |       |
|----------------------------|--------------------|------------------|-------|-------|-------|
|                            |                    | (20)             | (21)  | (22)  | (23)  |
| VASTY2 (SAIR*10000)+VASTY  | 403073101          | ,000             | ,000  | ,000  | ,000  |
|                            | 403073102          | ,000             | ,000  | ,000  | ,000  |
|                            | 403073103          | ,000             | ,000  | ,000  | ,000  |
|                            | 403073202          | ,000             | ,000  | ,000  | ,000  |
|                            | 403073203          | ,000             | ,000  | ,000  | ,000  |
|                            | 403073204          | ,000             | ,000  | ,000  | ,000  |
|                            | 403073303          | ,000             | ,000  | ,000  | ,000  |
|                            | 403073651          | ,000             | ,000  | ,000  | ,000  |
|                            | 403073771          | ,000             | ,000  | ,000  | ,000  |
|                            | 403133102          | ,000             | ,000  | ,000  | ,000  |
|                            | 403133106          | ,000             | ,000  | ,000  | ,000  |
|                            | 403133107          | ,000             | ,000  | ,000  | ,000  |
|                            | 403133109          | ,000             | ,000  | ,000  | ,000  |
|                            | 403133202          | ,000             | ,000  | ,000  | ,000  |
|                            | 403133203          | ,000             | ,000  | ,000  | ,000  |
|                            | 403133204          | ,000             | ,000  | ,000  | ,000  |
|                            | 403133315          | ,000             | ,000  | ,000  | ,000  |
|                            | 403133322          | ,000             | ,000  | ,000  | ,000  |
|                            | 403133401          | ,000             | ,000  | ,000  | ,000  |
|                            | 403133402          | ,000             | ,000  | ,000  | ,000  |
|                            | 403133550          | 1,000            | ,000  | ,000  | ,000  |
|                            | 403133772          | ,000             | 1,000 | ,000  | ,000  |
|                            | 403135803          | ,000             | ,000  | 1,000 | ,000  |
|                            | 404060001          | ,000             | ,000  | ,000  | 1,000 |
|                            | 404060002          | ,000             | ,000  | ,000  | ,000  |
|                            | 404310003          | ,000             | ,000  | ,000  | ,000  |
|                            | 404310004          | ,000             | ,000  | ,000  | ,000  |
|                            | 502300005          | ,000             | ,000  | ,000  | ,000  |
|                            | 502300006          | ,000             | ,000  | ,000  | ,000  |
|                            | 502300007          | ,000             | ,000  | ,000  | ,000  |
|                            | 502300214          | ,000             | ,000  | ,000  | ,000  |
|                            | 502300411          | ,000             | ,000  | ,000  | ,000  |
|                            | 502300415          | ,000             | ,000  | ,000  | ,000  |
|                            | 502300416          | ,000             | ,000  | ,000  | ,000  |
|                            | 502300811          | ,000             | ,000  | ,000  | ,000  |
|                            | 502300913          | ,000             | ,000  | ,000  | ,000  |
| sv5 kvintiler för standard | 1 tredje kvintilen |                  |       |       |       |
|                            | 2 första kvintilen |                  |       |       |       |
|                            | 3 andra kvintilen  |                  |       |       |       |
|                            | 4 fjärde kvintilen |                  |       |       |       |
|                            | 5 femte kvintilen  |                  |       |       |       |



## Categorical Variables Codings

|                            |                    | Parameter coding |       |       |       |
|----------------------------|--------------------|------------------|-------|-------|-------|
|                            |                    | (24)             | (25)  | (26)  | (27)  |
| VASTY2 (SAIR*10000)+VASTY  | 403073101          | ,000             | ,000  | ,000  | ,000  |
|                            | 403073102          | ,000             | ,000  | ,000  | ,000  |
|                            | 403073103          | ,000             | ,000  | ,000  | ,000  |
|                            | 403073202          | ,000             | ,000  | ,000  | ,000  |
|                            | 403073203          | ,000             | ,000  | ,000  | ,000  |
|                            | 403073204          | ,000             | ,000  | ,000  | ,000  |
|                            | 403073303          | ,000             | ,000  | ,000  | ,000  |
|                            | 403073651          | ,000             | ,000  | ,000  | ,000  |
|                            | 403073771          | ,000             | ,000  | ,000  | ,000  |
|                            | 403133102          | ,000             | ,000  | ,000  | ,000  |
|                            | 403133106          | ,000             | ,000  | ,000  | ,000  |
|                            | 403133107          | ,000             | ,000  | ,000  | ,000  |
|                            | 403133109          | ,000             | ,000  | ,000  | ,000  |
|                            | 403133202          | ,000             | ,000  | ,000  | ,000  |
|                            | 403133203          | ,000             | ,000  | ,000  | ,000  |
|                            | 403133204          | ,000             | ,000  | ,000  | ,000  |
|                            | 403133315          | ,000             | ,000  | ,000  | ,000  |
|                            | 403133322          | ,000             | ,000  | ,000  | ,000  |
|                            | 403133401          | ,000             | ,000  | ,000  | ,000  |
|                            | 403133402          | ,000             | ,000  | ,000  | ,000  |
|                            | 403133550          | ,000             | ,000  | ,000  | ,000  |
|                            | 403133772          | ,000             | ,000  | ,000  | ,000  |
|                            | 403135803          | ,000             | ,000  | ,000  | ,000  |
|                            | 404060001          | ,000             | ,000  | ,000  | ,000  |
|                            | 404060002          | 1,000            | ,000  | ,000  | ,000  |
|                            | 404310003          | ,000             | 1,000 | ,000  | ,000  |
|                            | 404310004          | ,000             | ,000  | 1,000 | ,000  |
|                            | 502300005          | ,000             | ,000  | ,000  | 1,000 |
|                            | 502300006          | ,000             | ,000  | ,000  | ,000  |
|                            | 502300007          | ,000             | ,000  | ,000  | ,000  |
|                            | 502300214          | ,000             | ,000  | ,000  | ,000  |
|                            | 502300411          | ,000             | ,000  | ,000  | ,000  |
|                            | 502300415          | ,000             | ,000  | ,000  | ,000  |
|                            | 502300416          | ,000             | ,000  | ,000  | ,000  |
|                            | 502300811          | ,000             | ,000  | ,000  | ,000  |
|                            | 502300913          | ,000             | ,000  | ,000  | ,000  |
| sv5 kvintiler för standard | 1 tredje kvintilen |                  |       |       |       |
|                            | 2 första kvintilen |                  |       |       |       |
|                            | 3 andra kvintilen  |                  |       |       |       |
|                            | 4 fjärde kvintilen |                  |       |       |       |
|                            | 5 femte kvintilen  |                  |       |       |       |

## Categorical Variables Codings

|                            |                    | Parameter coding |       |       |       |
|----------------------------|--------------------|------------------|-------|-------|-------|
|                            |                    | (28)             | (29)  | (30)  | (31)  |
| VASTY2 (SAIR*10000)+VASTY  | 403073101          | ,000             | ,000  | ,000  | ,000  |
|                            | 403073102          | ,000             | ,000  | ,000  | ,000  |
|                            | 403073103          | ,000             | ,000  | ,000  | ,000  |
|                            | 403073202          | ,000             | ,000  | ,000  | ,000  |
|                            | 403073203          | ,000             | ,000  | ,000  | ,000  |
|                            | 403073204          | ,000             | ,000  | ,000  | ,000  |
|                            | 403073303          | ,000             | ,000  | ,000  | ,000  |
|                            | 403073651          | ,000             | ,000  | ,000  | ,000  |
|                            | 403073771          | ,000             | ,000  | ,000  | ,000  |
|                            | 403133102          | ,000             | ,000  | ,000  | ,000  |
|                            | 403133106          | ,000             | ,000  | ,000  | ,000  |
|                            | 403133107          | ,000             | ,000  | ,000  | ,000  |
|                            | 403133109          | ,000             | ,000  | ,000  | ,000  |
|                            | 403133202          | ,000             | ,000  | ,000  | ,000  |
|                            | 403133203          | ,000             | ,000  | ,000  | ,000  |
|                            | 403133204          | ,000             | ,000  | ,000  | ,000  |
|                            | 403133315          | ,000             | ,000  | ,000  | ,000  |
|                            | 403133322          | ,000             | ,000  | ,000  | ,000  |
|                            | 403133401          | ,000             | ,000  | ,000  | ,000  |
|                            | 403133402          | ,000             | ,000  | ,000  | ,000  |
|                            | 403133550          | ,000             | ,000  | ,000  | ,000  |
|                            | 403133772          | ,000             | ,000  | ,000  | ,000  |
|                            | 403135803          | ,000             | ,000  | ,000  | ,000  |
|                            | 404060001          | ,000             | ,000  | ,000  | ,000  |
|                            | 404060002          | ,000             | ,000  | ,000  | ,000  |
|                            | 404310003          | ,000             | ,000  | ,000  | ,000  |
|                            | 404310004          | ,000             | ,000  | ,000  | ,000  |
|                            | 502300005          | ,000             | ,000  | ,000  | ,000  |
|                            | 502300006          | 1,000            | ,000  | ,000  | ,000  |
|                            | 502300007          | ,000             | 1,000 | ,000  | ,000  |
|                            | 502300214          | ,000             | ,000  | 1,000 | ,000  |
|                            | 502300411          | ,000             | ,000  | ,000  | 1,000 |
|                            | 502300415          | ,000             | ,000  | ,000  | ,000  |
|                            | 502300416          | ,000             | ,000  | ,000  | ,000  |
|                            | 502300811          | ,000             | ,000  | ,000  | ,000  |
|                            | 502300913          | ,000             | ,000  | ,000  | ,000  |
| sv5 kvintiler för standard | 1 tredje kvintilen |                  |       |       |       |
|                            | 2 första kvintilen |                  |       |       |       |
|                            | 3 andra kvintilen  |                  |       |       |       |
|                            | 4 fjärde kvintilen |                  |       |       |       |
|                            | 5 femte kvintilen  |                  |       |       |       |

## Categorical Variables Codings

|                            |                    | Parameter coding |       |       |       |
|----------------------------|--------------------|------------------|-------|-------|-------|
|                            |                    | (32)             | (33)  | (34)  | (35)  |
| VASTY2 (SAIR*10000)+VASTY  | 403073101          | ,000             | ,000  | ,000  | ,000  |
|                            | 403073102          | ,000             | ,000  | ,000  | ,000  |
|                            | 403073103          | ,000             | ,000  | ,000  | ,000  |
|                            | 403073202          | ,000             | ,000  | ,000  | ,000  |
|                            | 403073203          | ,000             | ,000  | ,000  | ,000  |
|                            | 403073204          | ,000             | ,000  | ,000  | ,000  |
|                            | 403073303          | ,000             | ,000  | ,000  | ,000  |
|                            | 403073651          | ,000             | ,000  | ,000  | ,000  |
|                            | 403073771          | ,000             | ,000  | ,000  | ,000  |
|                            | 403133102          | ,000             | ,000  | ,000  | ,000  |
|                            | 403133106          | ,000             | ,000  | ,000  | ,000  |
|                            | 403133107          | ,000             | ,000  | ,000  | ,000  |
|                            | 403133109          | ,000             | ,000  | ,000  | ,000  |
|                            | 403133202          | ,000             | ,000  | ,000  | ,000  |
|                            | 403133203          | ,000             | ,000  | ,000  | ,000  |
|                            | 403133204          | ,000             | ,000  | ,000  | ,000  |
|                            | 403133315          | ,000             | ,000  | ,000  | ,000  |
|                            | 403133322          | ,000             | ,000  | ,000  | ,000  |
|                            | 403133401          | ,000             | ,000  | ,000  | ,000  |
|                            | 403133402          | ,000             | ,000  | ,000  | ,000  |
|                            | 403133550          | ,000             | ,000  | ,000  | ,000  |
|                            | 403133772          | ,000             | ,000  | ,000  | ,000  |
|                            | 403135803          | ,000             | ,000  | ,000  | ,000  |
|                            | 404060001          | ,000             | ,000  | ,000  | ,000  |
|                            | 404060002          | ,000             | ,000  | ,000  | ,000  |
|                            | 404310003          | ,000             | ,000  | ,000  | ,000  |
|                            | 404310004          | ,000             | ,000  | ,000  | ,000  |
|                            | 502300005          | ,000             | ,000  | ,000  | ,000  |
|                            | 502300006          | ,000             | ,000  | ,000  | ,000  |
|                            | 502300007          | ,000             | ,000  | ,000  | ,000  |
|                            | 502300214          | ,000             | ,000  | ,000  | ,000  |
|                            | 502300411          | ,000             | ,000  | ,000  | ,000  |
|                            | 502300415          | 1,000            | ,000  | ,000  | ,000  |
|                            | 502300416          | ,000             | 1,000 | ,000  | ,000  |
|                            | 502300811          | ,000             | ,000  | 1,000 | ,000  |
|                            | 502300913          | ,000             | ,000  | ,000  | 1,000 |
| sv5 kvintiler för standard | 1 tredje kvintilen |                  |       |       |       |
|                            | 2 första kvintilen |                  |       |       |       |
|                            | 3 andra kvintilen  |                  |       |       |       |
|                            | 4 fjärde kvintilen |                  |       |       |       |
|                            | 5 femte kvintilen  |                  |       |       |       |

## Block 0: Beginning Block

Classification Table<sup>a,b</sup>

| Observed           |                              | Predicted                    |                     |
|--------------------|------------------------------|------------------------------|---------------------|
|                    |                              | hand01 händelse nej eller ja |                     |
|                    |                              | 0 ingen händelse             | 1 minst en händelse |
| Step 0             | hand01 händelse nej eller ja | 0 ingen händelse             | 11108               |
|                    |                              | 1 minst en händelse          | 1367                |
| Overall Percentage |                              |                              |                     |

Classification Table<sup>a,b</sup>

| Observed           |                              | Predicted           |       |
|--------------------|------------------------------|---------------------|-------|
|                    |                              | Percentage Correct  |       |
| Step 0             | hand01 händelse nej eller ja | 0 ingen händelse    | 100,0 |
|                    |                              | 1 minst en händelse | ,0    |
| Overall Percentage |                              |                     | 89,0  |

a. Constant is included in the model.

b. The cut value is ,500

Variables in the Equation

|                 | B      | S.E. | Wald     | df | Sig. | Exp(B) |
|-----------------|--------|------|----------|----|------|--------|
| Step 0 Constant | -2,095 | ,029 | 5342,584 | 1  | ,000 | ,123   |

## Variables not in the Equation

|        |                    |            | Score   | df | Sig. |
|--------|--------------------|------------|---------|----|------|
| Step 0 | Variables          | sv5        | 37,974  | 4  | ,000 |
|        |                    | sv5(1)     | 31,998  | 1  | ,000 |
|        |                    | sv5(2)     | ,095    | 1  | ,757 |
|        |                    | sv5(3)     | 1,220   | 1  | ,269 |
|        |                    | sv5(4)     | 15,862  | 1  | ,000 |
|        |                    | VASTY2     | 541,214 | 35 | ,000 |
|        |                    | VASTY2(1)  | 1,169   | 1  | ,280 |
|        |                    | VASTY2(2)  | 87,511  | 1  | ,000 |
|        |                    | VASTY2(3)  | 13,995  | 1  | ,000 |
|        |                    | VASTY2(4)  | ,464    | 1  | ,496 |
|        |                    | VASTY2(5)  | 5,526   | 1  | ,019 |
|        |                    | VASTY2(6)  | 19,435  | 1  | ,000 |
|        |                    | VASTY2(7)  | 86,074  | 1  | ,000 |
|        |                    | VASTY2(8)  | 1,043   | 1  | ,307 |
|        |                    | VASTY2(9)  | ,408    | 1  | ,523 |
|        |                    | VASTY2(10) | 58,583  | 1  | ,000 |
|        |                    | VASTY2(11) | 33,445  | 1  | ,000 |
|        |                    | VASTY2(12) | ,029    | 1  | ,865 |
|        |                    | VASTY2(13) | 33,445  | 1  | ,000 |
|        |                    | VASTY2(14) | 4,163   | 1  | ,041 |
|        |                    | VASTY2(15) | ,464    | 1  | ,496 |
|        |                    | VASTY2(16) | ,763    | 1  | ,382 |
|        |                    | VASTY2(17) | 24,320  | 1  | ,000 |
|        |                    | VASTY2(18) | 17,742  | 1  | ,000 |
|        |                    | VASTY2(19) | 27,791  | 1  | ,000 |
|        |                    | VASTY2(20) | ,015    | 1  | ,902 |
|        |                    | VASTY2(21) | 2,890   | 1  | ,089 |
|        |                    | VASTY2(22) | ,462    | 1  | ,497 |
|        |                    | VASTY2(23) | 15,306  | 1  | ,000 |
|        |                    | VASTY2(24) | 12,594  | 1  | ,000 |
|        |                    | VASTY2(25) | ,128    | 1  | ,720 |
|        |                    | VASTY2(26) | 12,864  | 1  | ,000 |
|        |                    | VASTY2(27) | 24,439  | 1  | ,000 |
|        |                    | VASTY2(28) | 9,963   | 1  | ,002 |
|        |                    | VASTY2(29) | 18,184  | 1  | ,000 |
|        |                    | VASTY2(30) | ,486    | 1  | ,486 |
|        |                    | VASTY2(31) | 6,400   | 1  | ,011 |
|        |                    | VASTY2(32) | 1,626   | 1  | ,202 |
|        |                    | VASTY2(33) | 1,336   | 1  | ,248 |
|        |                    | VASTY2(34) | 29,489  | 1  | ,000 |
|        |                    | VASTY2(35) | 3,668   | 1  | ,055 |
|        | Overall Statistics |            | 562,508 | 39 | ,000 |

**Block 1: Method = Enter****Omnibus Tests of Model Coefficients**

|        |       | Chi-square | df | Sig. |
|--------|-------|------------|----|------|
| Step 1 | Step  | 558,845    | 39 | ,000 |
|        | Block | 558,845    | 39 | ,000 |
|        | Model | 558,845    | 39 | ,000 |

**Model Summary**

| Step | -2 Log likelihood     | Cox & Snell R Square | Nagelkerke R Square |
|------|-----------------------|----------------------|---------------------|
| 1    | 8064,737 <sup>a</sup> | ,044                 | ,088                |

a. Estimation terminated at iteration number 6 because parameter estimates changed by less than ,001.

**Classification Table<sup>a</sup>**

|                    |        | Predicted                    |                           |
|--------------------|--------|------------------------------|---------------------------|
|                    |        | hand01 hændelse nej eller ja |                           |
| Observed           |        | 0 ingen hændelse             | 1 minst en hændelse       |
|                    | Step 1 | hand01 hændelse nej eller ja | 0 ingen hændelse<br>11108 |
|                    |        | 1367                         | 0                         |
| Overall Percentage |        |                              |                           |

**Classification Table<sup>a</sup>**

|                    |                              | Predicted          |
|--------------------|------------------------------|--------------------|
|                    |                              | Percentage Correct |
| Step 1             | hand01 hændelse nej eller ja | 100,0              |
|                    |                              | ,0                 |
| Overall Percentage |                              | 89,0               |

a. The cut value is ,500

## Variables in the Equation

|                     |            | B      | S.E. | Wald    | df | Sig. | Exp(B) |
|---------------------|------------|--------|------|---------|----|------|--------|
| Step 1 <sup>a</sup> | sv5        |        |      | 20,334  | 4  | ,000 |        |
|                     | sv5(1)     | -,231  | ,108 | 4,557   | 1  | ,033 | ,794   |
|                     | sv5(2)     | -,057  | ,108 | ,279    | 1  | ,597 | ,945   |
|                     | sv5(3)     | -,053  | ,100 | ,283    | 1  | ,595 | ,948   |
|                     | sv5(4)     | ,269   | ,107 | 6,278   | 1  | ,012 | 1,309  |
|                     | VASTY2     |        |      | 432,108 | 35 | ,000 |        |
|                     | VASTY2(1)  | ,291   | ,241 | 1,465   | 1  | ,226 | 1,338  |
|                     | VASTY2(2)  | 1,054  | ,221 | 22,667  | 1  | ,000 | 2,869  |
|                     | VASTY2(3)  | -,662  | ,302 | 4,808   | 1  | ,028 | ,516   |
|                     | VASTY2(4)  | ,316   | ,242 | 1,709   | 1  | ,191 | 1,372  |
|                     | VASTY2(5)  | -,250  | ,283 | ,781    | 1  | ,377 | ,779   |
|                     | VASTY2(6)  | -1,199 | ,334 | 12,908  | 1  | ,000 | ,301   |
|                     | VASTY2(7)  | 1,262  | ,217 | 33,934  | 1  | ,000 | 3,534  |
|                     | VASTY2(8)  | ,376   | ,241 | 2,443   | 1  | ,118 | 1,456  |
|                     | VASTY2(9)  | ,292   | ,245 | 1,414   | 1  | ,234 | 1,339  |
|                     | VASTY2(10) | ,871   | ,226 | 14,883  | 1  | ,000 | 2,389  |
|                     | VASTY2(11) | ,907   | ,223 | 16,623  | 1  | ,000 | 2,477  |
|                     | VASTY2(12) | ,008   | ,251 | ,001    | 1  | ,976 | 1,008  |
|                     | VASTY2(13) | ,686   | ,230 | 8,900   | 1  | ,003 | 1,986  |
|                     | VASTY2(14) | -,336  | ,269 | 1,557   | 1  | ,212 | ,715   |
|                     | VASTY2(15) | ,119   | ,246 | ,235    | 1  | ,628 | 1,127  |
|                     | VASTY2(16) | ,317   | ,289 | 1,200   | 1  | ,273 | 1,373  |
|                     | VASTY2(17) | -1,165 | ,356 | 10,728  | 1  | ,001 | ,312   |
|                     | VASTY2(18) | -,683  | ,328 | 4,334   | 1  | ,037 | ,505   |
|                     | VASTY2(19) | -1,214 | ,390 | 9,669   | 1  | ,002 | ,297   |
|                     | VASTY2(20) | ,022   | ,263 | ,007    | 1  | ,933 | 1,022  |
|                     | VASTY2(21) | -,098  | ,263 | ,138    | 1  | ,710 | ,907   |
|                     | VASTY2(22) | ,053   | ,252 | ,045    | 1  | ,832 | 1,055  |
|                     | VASTY2(23) | ,729   | ,228 | 10,258  | 1  | ,001 | 2,073  |
|                     | VASTY2(24) | ,589   | ,229 | 6,595   | 1  | ,010 | 1,803  |
|                     | VASTY2(25) | ,156   | ,265 | ,346    | 1  | ,556 | 1,169  |
|                     | VASTY2(26) | -,806  | ,336 | 5,735   | 1  | ,017 | ,447   |
|                     | VASTY2(27) | -1,343 | ,358 | 14,078  | 1  | ,000 | ,261   |
|                     | VASTY2(28) | -1,089 | ,378 | 8,296   | 1  | ,004 | ,337   |
|                     | VASTY2(29) | -1,185 | ,329 | 12,977  | 1  | ,000 | ,306   |
|                     | VASTY2(30) | ,113   | ,253 | ,200    | 1  | ,655 | 1,119  |
|                     | VASTY2(31) | ,693   | ,240 | 8,319   | 1  | ,004 | 1,999  |
|                     | VASTY2(32) | ,130   | ,269 | ,235    | 1  | ,628 | 1,139  |
|                     | VASTY2(33) | ,161   | ,268 | ,360    | 1  | ,548 | 1,175  |
|                     | VASTY2(34) | -1,523 | ,400 | 14,471  | 1  | ,000 | ,218   |
|                     | VASTY2(35) | ,477   | ,243 | 3,866   | 1  | ,049 | 1,611  |
|                     | Constant   | -2,232 | ,190 | 138,002 | 1  | ,000 | ,107   |

## Variables in the Equation

|                     |            | 95% C.I. for EXP(B) |       |
|---------------------|------------|---------------------|-------|
|                     |            | Lower               | Upper |
| Step 1 <sup>a</sup> | sv5        |                     |       |
|                     | sv5(1)     | ,642                | ,981  |
|                     | sv5(2)     | ,765                | 1,167 |
|                     | sv5(3)     | ,780                | 1,153 |
|                     | sv5(4)     | 1,060               | 1,616 |
|                     | VASTY2     |                     |       |
|                     | VASTY2(1)  | ,835                | 2,145 |
|                     | VASTY2(2)  | 1,859               | 4,427 |
|                     | VASTY2(3)  | ,286                | ,932  |
|                     | VASTY2(4)  | ,854                | 2,204 |
|                     | VASTY2(5)  | ,447                | 1,356 |
|                     | VASTY2(6)  | ,157                | ,580  |
|                     | VASTY2(7)  | 2,311               | 5,404 |
|                     | VASTY2(8)  | ,909                | 2,333 |
|                     | VASTY2(9)  | ,828                | 2,166 |
|                     | VASTY2(10) | 1,535               | 3,720 |
|                     | VASTY2(11) | 1,602               | 3,832 |
|                     | VASTY2(12) | ,616                | 1,647 |
|                     | VASTY2(13) | 1,265               | 3,118 |
|                     | VASTY2(14) | ,422                | 1,211 |
|                     | VASTY2(15) | ,696                | 1,825 |
|                     | VASTY2(16) | ,779                | 2,419 |
|                     | VASTY2(17) | ,155                | ,626  |
|                     | VASTY2(18) | ,265                | ,961  |
|                     | VASTY2(19) | ,138                | ,638  |
|                     | VASTY2(20) | ,611                | 1,712 |
|                     | VASTY2(21) | ,542                | 1,518 |
|                     | VASTY2(22) | ,644                | 1,727 |
|                     | VASTY2(23) | 1,327               | 3,239 |
|                     | VASTY2(24) | 1,150               | 2,826 |
|                     | VASTY2(25) | ,695                | 1,964 |
|                     | VASTY2(26) | ,231                | ,864  |
|                     | VASTY2(27) | ,129                | ,527  |
|                     | VASTY2(28) | ,160                | ,706  |
|                     | VASTY2(29) | ,160                | ,583  |
|                     | VASTY2(30) | ,682                | 1,837 |
|                     | VASTY2(31) | 1,249               | 3,200 |
|                     | VASTY2(32) | ,672                | 1,931 |
|                     | VASTY2(33) | ,694                | 1,987 |
|                     | VASTY2(34) | ,099                | ,478  |
|                     | VASTY2(35) | 1,001               | 2,593 |
|                     | Constant   |                     |       |



a. Variable(s) entered on step 1: sv5, VASTY2.

```
LOGISTIC REGRESSION VARIABLES hand01
/METHOD=ENTER sv7 VASTY2
/CONTRAST (sv7)=Indicator(1)
/CONTRAST (VASTY2)=Indicator(1)
/PRINT=CI(95)
/CRITERIA=PIN(0.05) POUT(0.10) ITERATE(20) CUT(0.5).
```

## Logistic Regression

[DataSet6] C:\cWordjan\Rafaela\_VCS\alla\_tillsammans\abo\_bjo\_vasa\_v1.sav

### Case Processing Summary

| Unweighted Cases <sup>a</sup> |                      | N     | Percent |
|-------------------------------|----------------------|-------|---------|
| Selected Cases                | Included in Analysis | 12475 | 100,0   |
|                               | Missing Cases        | 0     | ,0      |
|                               | Total                | 12475 | 100,0   |
| Unselected Cases              |                      | 0     | ,0      |
| Total                         |                      | 12475 | 100,0   |

a. If weight is in effect, see classification table for the total number of cases.

### Dependent Variable Encoding

| Original Value      | Internal Value |
|---------------------|----------------|
| 0 ingen händelse    | 0              |
| 1 minst en händelse | 1              |

## Categorical Variables Codings

|                                                   | Frequency | Parameter coding |       |       |
|---------------------------------------------------|-----------|------------------|-------|-------|
|                                                   |           | (1)              | (2)   | (3)   |
| VASTY2 (SAIR*10000)+VASTY 403073101               | 365       | ,000             | ,000  | ,000  |
| 403073102                                         | 362       | 1,000            | ,000  | ,000  |
| 403073103                                         | 365       | ,000             | 1,000 | ,000  |
| 403073202                                         | 365       | ,000             | ,000  | 1,000 |
| 403073203                                         | 365       | ,000             | ,000  | ,000  |
| 403073204                                         | 330       | ,000             | ,000  | ,000  |
| 403073303                                         | 364       | ,000             | ,000  | ,000  |
| 403073651                                         | 362       | ,000             | ,000  | ,000  |
| 403073771                                         | 365       | ,000             | ,000  | ,000  |
| 403133102                                         | 341       | ,000             | ,000  | ,000  |
| 403133106                                         | 365       | ,000             | ,000  | ,000  |
| 403133107                                         | 365       | ,000             | ,000  | ,000  |
| 403133109                                         | 365       | ,000             | ,000  | ,000  |
| 403133202                                         | 365       | ,000             | ,000  | ,000  |
| 403133203                                         | 365       | ,000             | ,000  | ,000  |
| 403133204                                         | 365       | ,000             | ,000  | ,000  |
| 403133315                                         | 177       | ,000             | ,000  | ,000  |
| 403133322                                         | 365       | ,000             | ,000  | ,000  |
| 403133401                                         | 362       | ,000             | ,000  | ,000  |
| 403133402                                         | 365       | ,000             | ,000  | ,000  |
| 403133550                                         | 298       | ,000             | ,000  | ,000  |
| 403133772                                         | 365       | ,000             | ,000  | ,000  |
| 403135803                                         | 365       | ,000             | ,000  | ,000  |
| 404060001                                         | 365       | ,000             | ,000  | ,000  |
| 404060002                                         | 366       | ,000             | ,000  | ,000  |
| 404310003                                         | 291       | ,000             | ,000  | ,000  |
| 404310004                                         | 291       | ,000             | ,000  | ,000  |
| 502300005                                         | 366       | ,000             | ,000  | ,000  |
| 502300006                                         | 225       | ,000             | ,000  | ,000  |
| 502300007                                         | 366       | ,000             | ,000  | ,000  |
| 502300214                                         | 366       | ,000             | ,000  | ,000  |
| 502300411                                         | 366       | ,000             | ,000  | ,000  |
| 502300415                                         | 360       | ,000             | ,000  | ,000  |
| 502300416                                         | 363       | ,000             | ,000  | ,000  |
| 502300811                                         | 364       | ,000             | ,000  | ,000  |
| 502300913                                         | 315       | ,000             | ,000  | ,000  |
| sv7 sjättedelar för standard 1 fjärde sjundedelen | 1423      | ,000             | ,000  | ,000  |
| 2 första sjundedelen                              | 3031      | 1,000            | ,000  | ,000  |

## Categorical Variables Codings

|                              |                      | Parameter coding |       |       |       |
|------------------------------|----------------------|------------------|-------|-------|-------|
|                              |                      | (4)              | (5)   | (6)   | (7)   |
| VASTY2 (SAIR*10000)+VASTY    | 403073101            | ,000             | ,000  | ,000  | ,000  |
|                              | 403073102            | ,000             | ,000  | ,000  | ,000  |
|                              | 403073103            | ,000             | ,000  | ,000  | ,000  |
|                              | 403073202            | ,000             | ,000  | ,000  | ,000  |
|                              | 403073203            | 1,000            | ,000  | ,000  | ,000  |
|                              | 403073204            | ,000             | 1,000 | ,000  | ,000  |
|                              | 403073303            | ,000             | ,000  | 1,000 | ,000  |
|                              | 403073651            | ,000             | ,000  | ,000  | 1,000 |
|                              | 403073771            | ,000             | ,000  | ,000  | ,000  |
|                              | 403133102            | ,000             | ,000  | ,000  | ,000  |
|                              | 403133106            | ,000             | ,000  | ,000  | ,000  |
|                              | 403133107            | ,000             | ,000  | ,000  | ,000  |
|                              | 403133109            | ,000             | ,000  | ,000  | ,000  |
|                              | 403133202            | ,000             | ,000  | ,000  | ,000  |
|                              | 403133203            | ,000             | ,000  | ,000  | ,000  |
|                              | 403133204            | ,000             | ,000  | ,000  | ,000  |
|                              | 403133315            | ,000             | ,000  | ,000  | ,000  |
|                              | 403133322            | ,000             | ,000  | ,000  | ,000  |
|                              | 403133401            | ,000             | ,000  | ,000  | ,000  |
|                              | 403133402            | ,000             | ,000  | ,000  | ,000  |
|                              | 403133550            | ,000             | ,000  | ,000  | ,000  |
|                              | 403133772            | ,000             | ,000  | ,000  | ,000  |
|                              | 403135803            | ,000             | ,000  | ,000  | ,000  |
|                              | 404060001            | ,000             | ,000  | ,000  | ,000  |
|                              | 404060002            | ,000             | ,000  | ,000  | ,000  |
|                              | 404310003            | ,000             | ,000  | ,000  | ,000  |
|                              | 404310004            | ,000             | ,000  | ,000  | ,000  |
|                              | 502300005            | ,000             | ,000  | ,000  | ,000  |
|                              | 502300006            | ,000             | ,000  | ,000  | ,000  |
|                              | 502300007            | ,000             | ,000  | ,000  | ,000  |
|                              | 502300214            | ,000             | ,000  | ,000  | ,000  |
|                              | 502300411            | ,000             | ,000  | ,000  | ,000  |
|                              | 502300415            | ,000             | ,000  | ,000  | ,000  |
|                              | 502300416            | ,000             | ,000  | ,000  | ,000  |
|                              | 502300811            | ,000             | ,000  | ,000  | ,000  |
|                              | 502300913            | ,000             | ,000  | ,000  | ,000  |
| sv7 sjättedelar för standard | 1 fjärde sjundedelen | ,000             | ,000  | ,000  | ,000  |
|                              | 2 första sjundedelen | ,000             | ,000  | ,000  | ,000  |

## Categorical Variables Codings

|                              |                      | Parameter coding |       |       |       |
|------------------------------|----------------------|------------------|-------|-------|-------|
|                              |                      | (8)              | (9)   | (10)  | (11)  |
| VASTY2 (SAIR*10000)+VASTY    | 403073101            | ,000             | ,000  | ,000  | ,000  |
|                              | 403073102            | ,000             | ,000  | ,000  | ,000  |
|                              | 403073103            | ,000             | ,000  | ,000  | ,000  |
|                              | 403073202            | ,000             | ,000  | ,000  | ,000  |
|                              | 403073203            | ,000             | ,000  | ,000  | ,000  |
|                              | 403073204            | ,000             | ,000  | ,000  | ,000  |
|                              | 403073303            | ,000             | ,000  | ,000  | ,000  |
|                              | 403073651            | ,000             | ,000  | ,000  | ,000  |
|                              | 403073771            | 1,000            | ,000  | ,000  | ,000  |
|                              | 403133102            | ,000             | 1,000 | ,000  | ,000  |
|                              | 403133106            | ,000             | ,000  | 1,000 | ,000  |
|                              | 403133107            | ,000             | ,000  | ,000  | 1,000 |
|                              | 403133109            | ,000             | ,000  | ,000  | ,000  |
|                              | 403133202            | ,000             | ,000  | ,000  | ,000  |
|                              | 403133203            | ,000             | ,000  | ,000  | ,000  |
|                              | 403133204            | ,000             | ,000  | ,000  | ,000  |
|                              | 403133315            | ,000             | ,000  | ,000  | ,000  |
|                              | 403133322            | ,000             | ,000  | ,000  | ,000  |
|                              | 403133401            | ,000             | ,000  | ,000  | ,000  |
|                              | 403133402            | ,000             | ,000  | ,000  | ,000  |
|                              | 403133550            | ,000             | ,000  | ,000  | ,000  |
|                              | 403133772            | ,000             | ,000  | ,000  | ,000  |
|                              | 403135803            | ,000             | ,000  | ,000  | ,000  |
|                              | 404060001            | ,000             | ,000  | ,000  | ,000  |
|                              | 404060002            | ,000             | ,000  | ,000  | ,000  |
|                              | 404310003            | ,000             | ,000  | ,000  | ,000  |
|                              | 404310004            | ,000             | ,000  | ,000  | ,000  |
|                              | 502300005            | ,000             | ,000  | ,000  | ,000  |
|                              | 502300006            | ,000             | ,000  | ,000  | ,000  |
|                              | 502300007            | ,000             | ,000  | ,000  | ,000  |
|                              | 502300214            | ,000             | ,000  | ,000  | ,000  |
|                              | 502300411            | ,000             | ,000  | ,000  | ,000  |
|                              | 502300415            | ,000             | ,000  | ,000  | ,000  |
|                              | 502300416            | ,000             | ,000  | ,000  | ,000  |
|                              | 502300811            | ,000             | ,000  | ,000  | ,000  |
|                              | 502300913            | ,000             | ,000  | ,000  | ,000  |
| sv7 sjättedelar för standard | 1 fjärde sjundedelen |                  |       |       |       |
|                              | 2 första sjundedelen |                  |       |       |       |

## Categorical Variables Codings

|                              |                      | Parameter coding |       |       |       |
|------------------------------|----------------------|------------------|-------|-------|-------|
|                              |                      | (12)             | (13)  | (14)  | (15)  |
| VASTY2 (SAIR*10000)+VASTY    | 403073101            | ,000             | ,000  | ,000  | ,000  |
|                              | 403073102            | ,000             | ,000  | ,000  | ,000  |
|                              | 403073103            | ,000             | ,000  | ,000  | ,000  |
|                              | 403073202            | ,000             | ,000  | ,000  | ,000  |
|                              | 403073203            | ,000             | ,000  | ,000  | ,000  |
|                              | 403073204            | ,000             | ,000  | ,000  | ,000  |
|                              | 403073303            | ,000             | ,000  | ,000  | ,000  |
|                              | 403073651            | ,000             | ,000  | ,000  | ,000  |
|                              | 403073771            | ,000             | ,000  | ,000  | ,000  |
|                              | 403133102            | ,000             | ,000  | ,000  | ,000  |
|                              | 403133106            | ,000             | ,000  | ,000  | ,000  |
|                              | 403133107            | ,000             | ,000  | ,000  | ,000  |
|                              | 403133109            | 1,000            | ,000  | ,000  | ,000  |
|                              | 403133202            | ,000             | 1,000 | ,000  | ,000  |
|                              | 403133203            | ,000             | ,000  | 1,000 | ,000  |
|                              | 403133204            | ,000             | ,000  | ,000  | 1,000 |
|                              | 403133315            | ,000             | ,000  | ,000  | ,000  |
|                              | 403133322            | ,000             | ,000  | ,000  | ,000  |
|                              | 403133401            | ,000             | ,000  | ,000  | ,000  |
|                              | 403133402            | ,000             | ,000  | ,000  | ,000  |
|                              | 403133550            | ,000             | ,000  | ,000  | ,000  |
|                              | 403133772            | ,000             | ,000  | ,000  | ,000  |
|                              | 403135803            | ,000             | ,000  | ,000  | ,000  |
|                              | 404060001            | ,000             | ,000  | ,000  | ,000  |
|                              | 404060002            | ,000             | ,000  | ,000  | ,000  |
|                              | 404310003            | ,000             | ,000  | ,000  | ,000  |
|                              | 404310004            | ,000             | ,000  | ,000  | ,000  |
|                              | 502300005            | ,000             | ,000  | ,000  | ,000  |
|                              | 502300006            | ,000             | ,000  | ,000  | ,000  |
|                              | 502300007            | ,000             | ,000  | ,000  | ,000  |
|                              | 502300214            | ,000             | ,000  | ,000  | ,000  |
|                              | 502300411            | ,000             | ,000  | ,000  | ,000  |
|                              | 502300415            | ,000             | ,000  | ,000  | ,000  |
|                              | 502300416            | ,000             | ,000  | ,000  | ,000  |
|                              | 502300811            | ,000             | ,000  | ,000  | ,000  |
|                              | 502300913            | ,000             | ,000  | ,000  | ,000  |
| sv7 sjättedelar för standard | 1 fjärde sjundedelen |                  |       |       |       |
|                              | 2 första sjundedelen |                  |       |       |       |

## Categorical Variables Codings

|                              |                      | Parameter coding |       |       |       |
|------------------------------|----------------------|------------------|-------|-------|-------|
|                              |                      | (16)             | (17)  | (18)  | (19)  |
| VASTY2 (SAIR*10000)+VASTY    | 403073101            | ,000             | ,000  | ,000  | ,000  |
|                              | 403073102            | ,000             | ,000  | ,000  | ,000  |
|                              | 403073103            | ,000             | ,000  | ,000  | ,000  |
|                              | 403073202            | ,000             | ,000  | ,000  | ,000  |
|                              | 403073203            | ,000             | ,000  | ,000  | ,000  |
|                              | 403073204            | ,000             | ,000  | ,000  | ,000  |
|                              | 403073303            | ,000             | ,000  | ,000  | ,000  |
|                              | 403073651            | ,000             | ,000  | ,000  | ,000  |
|                              | 403073771            | ,000             | ,000  | ,000  | ,000  |
|                              | 403133102            | ,000             | ,000  | ,000  | ,000  |
|                              | 403133106            | ,000             | ,000  | ,000  | ,000  |
|                              | 403133107            | ,000             | ,000  | ,000  | ,000  |
|                              | 403133109            | ,000             | ,000  | ,000  | ,000  |
|                              | 403133202            | ,000             | ,000  | ,000  | ,000  |
|                              | 403133203            | ,000             | ,000  | ,000  | ,000  |
|                              | 403133204            | ,000             | ,000  | ,000  | ,000  |
|                              | 403133315            | 1,000            | ,000  | ,000  | ,000  |
|                              | 403133322            | ,000             | 1,000 | ,000  | ,000  |
|                              | 403133401            | ,000             | ,000  | 1,000 | ,000  |
|                              | 403133402            | ,000             | ,000  | ,000  | 1,000 |
|                              | 403133550            | ,000             | ,000  | ,000  | ,000  |
|                              | 403133772            | ,000             | ,000  | ,000  | ,000  |
|                              | 403135803            | ,000             | ,000  | ,000  | ,000  |
|                              | 404060001            | ,000             | ,000  | ,000  | ,000  |
|                              | 404060002            | ,000             | ,000  | ,000  | ,000  |
|                              | 404310003            | ,000             | ,000  | ,000  | ,000  |
|                              | 404310004            | ,000             | ,000  | ,000  | ,000  |
|                              | 502300005            | ,000             | ,000  | ,000  | ,000  |
|                              | 502300006            | ,000             | ,000  | ,000  | ,000  |
|                              | 502300007            | ,000             | ,000  | ,000  | ,000  |
|                              | 502300214            | ,000             | ,000  | ,000  | ,000  |
|                              | 502300411            | ,000             | ,000  | ,000  | ,000  |
|                              | 502300415            | ,000             | ,000  | ,000  | ,000  |
|                              | 502300416            | ,000             | ,000  | ,000  | ,000  |
|                              | 502300811            | ,000             | ,000  | ,000  | ,000  |
|                              | 502300913            | ,000             | ,000  | ,000  | ,000  |
| sv7 sjättedelar för standard | 1 fjärde sjundedelen |                  |       |       |       |
|                              | 2 första sjundedelen |                  |       |       |       |

## Categorical Variables Codings

|                              |                      | Parameter coding |       |       |       |
|------------------------------|----------------------|------------------|-------|-------|-------|
|                              |                      | (20)             | (21)  | (22)  | (23)  |
| VASTY2 (SAIR*10000)+VASTY    | 403073101            | ,000             | ,000  | ,000  | ,000  |
|                              | 403073102            | ,000             | ,000  | ,000  | ,000  |
|                              | 403073103            | ,000             | ,000  | ,000  | ,000  |
|                              | 403073202            | ,000             | ,000  | ,000  | ,000  |
|                              | 403073203            | ,000             | ,000  | ,000  | ,000  |
|                              | 403073204            | ,000             | ,000  | ,000  | ,000  |
|                              | 403073303            | ,000             | ,000  | ,000  | ,000  |
|                              | 403073651            | ,000             | ,000  | ,000  | ,000  |
|                              | 403073771            | ,000             | ,000  | ,000  | ,000  |
|                              | 403133102            | ,000             | ,000  | ,000  | ,000  |
|                              | 403133106            | ,000             | ,000  | ,000  | ,000  |
|                              | 403133107            | ,000             | ,000  | ,000  | ,000  |
|                              | 403133109            | ,000             | ,000  | ,000  | ,000  |
|                              | 403133202            | ,000             | ,000  | ,000  | ,000  |
|                              | 403133203            | ,000             | ,000  | ,000  | ,000  |
|                              | 403133204            | ,000             | ,000  | ,000  | ,000  |
|                              | 403133315            | ,000             | ,000  | ,000  | ,000  |
|                              | 403133322            | ,000             | ,000  | ,000  | ,000  |
|                              | 403133401            | ,000             | ,000  | ,000  | ,000  |
|                              | 403133402            | ,000             | ,000  | ,000  | ,000  |
|                              | 403133550            | 1,000            | ,000  | ,000  | ,000  |
|                              | 403133772            | ,000             | 1,000 | ,000  | ,000  |
|                              | 403135803            | ,000             | ,000  | 1,000 | ,000  |
|                              | 404060001            | ,000             | ,000  | ,000  | 1,000 |
|                              | 404060002            | ,000             | ,000  | ,000  | ,000  |
|                              | 404310003            | ,000             | ,000  | ,000  | ,000  |
|                              | 404310004            | ,000             | ,000  | ,000  | ,000  |
|                              | 502300005            | ,000             | ,000  | ,000  | ,000  |
|                              | 502300006            | ,000             | ,000  | ,000  | ,000  |
|                              | 502300007            | ,000             | ,000  | ,000  | ,000  |
|                              | 502300214            | ,000             | ,000  | ,000  | ,000  |
|                              | 502300411            | ,000             | ,000  | ,000  | ,000  |
|                              | 502300415            | ,000             | ,000  | ,000  | ,000  |
|                              | 502300416            | ,000             | ,000  | ,000  | ,000  |
|                              | 502300811            | ,000             | ,000  | ,000  | ,000  |
|                              | 502300913            | ,000             | ,000  | ,000  | ,000  |
| sv7 sjättedelar för standard | 1 fjärde sjundedelen |                  |       |       |       |
|                              | 2 första sjundedelen |                  |       |       |       |

## Categorical Variables Codings

|                              |                      | Parameter coding |       |       |       |
|------------------------------|----------------------|------------------|-------|-------|-------|
|                              |                      | (24)             | (25)  | (26)  | (27)  |
| VASTY2 (SAIR*10000)+VASTY    | 403073101            | ,000             | ,000  | ,000  | ,000  |
|                              | 403073102            | ,000             | ,000  | ,000  | ,000  |
|                              | 403073103            | ,000             | ,000  | ,000  | ,000  |
|                              | 403073202            | ,000             | ,000  | ,000  | ,000  |
|                              | 403073203            | ,000             | ,000  | ,000  | ,000  |
|                              | 403073204            | ,000             | ,000  | ,000  | ,000  |
|                              | 403073303            | ,000             | ,000  | ,000  | ,000  |
|                              | 403073651            | ,000             | ,000  | ,000  | ,000  |
|                              | 403073771            | ,000             | ,000  | ,000  | ,000  |
|                              | 403133102            | ,000             | ,000  | ,000  | ,000  |
|                              | 403133106            | ,000             | ,000  | ,000  | ,000  |
|                              | 403133107            | ,000             | ,000  | ,000  | ,000  |
|                              | 403133109            | ,000             | ,000  | ,000  | ,000  |
|                              | 403133202            | ,000             | ,000  | ,000  | ,000  |
|                              | 403133203            | ,000             | ,000  | ,000  | ,000  |
|                              | 403133204            | ,000             | ,000  | ,000  | ,000  |
|                              | 403133315            | ,000             | ,000  | ,000  | ,000  |
|                              | 403133322            | ,000             | ,000  | ,000  | ,000  |
|                              | 403133401            | ,000             | ,000  | ,000  | ,000  |
|                              | 403133402            | ,000             | ,000  | ,000  | ,000  |
|                              | 403133550            | ,000             | ,000  | ,000  | ,000  |
|                              | 403133772            | ,000             | ,000  | ,000  | ,000  |
|                              | 403135803            | ,000             | ,000  | ,000  | ,000  |
|                              | 404060001            | ,000             | ,000  | ,000  | ,000  |
|                              | 404060002            | 1,000            | ,000  | ,000  | ,000  |
|                              | 404310003            | ,000             | 1,000 | ,000  | ,000  |
|                              | 404310004            | ,000             | ,000  | 1,000 | ,000  |
|                              | 502300005            | ,000             | ,000  | ,000  | 1,000 |
|                              | 502300006            | ,000             | ,000  | ,000  | ,000  |
|                              | 502300007            | ,000             | ,000  | ,000  | ,000  |
|                              | 502300214            | ,000             | ,000  | ,000  | ,000  |
|                              | 502300411            | ,000             | ,000  | ,000  | ,000  |
|                              | 502300415            | ,000             | ,000  | ,000  | ,000  |
|                              | 502300416            | ,000             | ,000  | ,000  | ,000  |
|                              | 502300811            | ,000             | ,000  | ,000  | ,000  |
|                              | 502300913            | ,000             | ,000  | ,000  | ,000  |
| sv7 sjättedelar för standard | 1 fjärde sjundedelen |                  |       |       |       |
|                              | 2 första sjundedelen |                  |       |       |       |



## Categorical Variables Codings

|                              |                      | Parameter coding |       |       |       |
|------------------------------|----------------------|------------------|-------|-------|-------|
|                              |                      | (28)             | (29)  | (30)  | (31)  |
| VASTY2 (SAIR*10000)+VASTY    | 403073101            | ,000             | ,000  | ,000  | ,000  |
|                              | 403073102            | ,000             | ,000  | ,000  | ,000  |
|                              | 403073103            | ,000             | ,000  | ,000  | ,000  |
|                              | 403073202            | ,000             | ,000  | ,000  | ,000  |
|                              | 403073203            | ,000             | ,000  | ,000  | ,000  |
|                              | 403073204            | ,000             | ,000  | ,000  | ,000  |
|                              | 403073303            | ,000             | ,000  | ,000  | ,000  |
|                              | 403073651            | ,000             | ,000  | ,000  | ,000  |
|                              | 403073771            | ,000             | ,000  | ,000  | ,000  |
|                              | 403133102            | ,000             | ,000  | ,000  | ,000  |
|                              | 403133106            | ,000             | ,000  | ,000  | ,000  |
|                              | 403133107            | ,000             | ,000  | ,000  | ,000  |
|                              | 403133109            | ,000             | ,000  | ,000  | ,000  |
|                              | 403133202            | ,000             | ,000  | ,000  | ,000  |
|                              | 403133203            | ,000             | ,000  | ,000  | ,000  |
|                              | 403133204            | ,000             | ,000  | ,000  | ,000  |
|                              | 403133315            | ,000             | ,000  | ,000  | ,000  |
|                              | 403133322            | ,000             | ,000  | ,000  | ,000  |
|                              | 403133401            | ,000             | ,000  | ,000  | ,000  |
|                              | 403133402            | ,000             | ,000  | ,000  | ,000  |
|                              | 403133550            | ,000             | ,000  | ,000  | ,000  |
|                              | 403133772            | ,000             | ,000  | ,000  | ,000  |
|                              | 403135803            | ,000             | ,000  | ,000  | ,000  |
|                              | 404060001            | ,000             | ,000  | ,000  | ,000  |
|                              | 404060002            | ,000             | ,000  | ,000  | ,000  |
|                              | 404310003            | ,000             | ,000  | ,000  | ,000  |
|                              | 404310004            | ,000             | ,000  | ,000  | ,000  |
|                              | 502300005            | ,000             | ,000  | ,000  | ,000  |
|                              | 502300006            | 1,000            | ,000  | ,000  | ,000  |
|                              | 502300007            | ,000             | 1,000 | ,000  | ,000  |
|                              | 502300214            | ,000             | ,000  | 1,000 | ,000  |
|                              | 502300411            | ,000             | ,000  | ,000  | 1,000 |
|                              | 502300415            | ,000             | ,000  | ,000  | ,000  |
|                              | 502300416            | ,000             | ,000  | ,000  | ,000  |
|                              | 502300811            | ,000             | ,000  | ,000  | ,000  |
|                              | 502300913            | ,000             | ,000  | ,000  | ,000  |
| sv7 sjättedelar för standard | 1 fjärde sjundedelen |                  |       |       |       |
|                              | 2 första sjundedelen |                  |       |       |       |

## Categorical Variables Codings

|                              |                      | Parameter coding |       |       |       |
|------------------------------|----------------------|------------------|-------|-------|-------|
|                              |                      | (32)             | (33)  | (34)  | (35)  |
| VASTY2 (SAIR*10000)+VASTY    | 403073101            | ,000             | ,000  | ,000  | ,000  |
|                              | 403073102            | ,000             | ,000  | ,000  | ,000  |
|                              | 403073103            | ,000             | ,000  | ,000  | ,000  |
|                              | 403073202            | ,000             | ,000  | ,000  | ,000  |
|                              | 403073203            | ,000             | ,000  | ,000  | ,000  |
|                              | 403073204            | ,000             | ,000  | ,000  | ,000  |
|                              | 403073303            | ,000             | ,000  | ,000  | ,000  |
|                              | 403073651            | ,000             | ,000  | ,000  | ,000  |
|                              | 403073771            | ,000             | ,000  | ,000  | ,000  |
|                              | 403133102            | ,000             | ,000  | ,000  | ,000  |
|                              | 403133106            | ,000             | ,000  | ,000  | ,000  |
|                              | 403133107            | ,000             | ,000  | ,000  | ,000  |
|                              | 403133109            | ,000             | ,000  | ,000  | ,000  |
|                              | 403133202            | ,000             | ,000  | ,000  | ,000  |
|                              | 403133203            | ,000             | ,000  | ,000  | ,000  |
|                              | 403133204            | ,000             | ,000  | ,000  | ,000  |
|                              | 403133315            | ,000             | ,000  | ,000  | ,000  |
|                              | 403133322            | ,000             | ,000  | ,000  | ,000  |
|                              | 403133401            | ,000             | ,000  | ,000  | ,000  |
|                              | 403133402            | ,000             | ,000  | ,000  | ,000  |
|                              | 403133550            | ,000             | ,000  | ,000  | ,000  |
|                              | 403133772            | ,000             | ,000  | ,000  | ,000  |
|                              | 403135803            | ,000             | ,000  | ,000  | ,000  |
|                              | 404060001            | ,000             | ,000  | ,000  | ,000  |
|                              | 404060002            | ,000             | ,000  | ,000  | ,000  |
|                              | 404310003            | ,000             | ,000  | ,000  | ,000  |
|                              | 404310004            | ,000             | ,000  | ,000  | ,000  |
|                              | 502300005            | ,000             | ,000  | ,000  | ,000  |
|                              | 502300006            | ,000             | ,000  | ,000  | ,000  |
|                              | 502300007            | ,000             | ,000  | ,000  | ,000  |
|                              | 502300214            | ,000             | ,000  | ,000  | ,000  |
|                              | 502300411            | ,000             | ,000  | ,000  | ,000  |
|                              | 502300415            | 1,000            | ,000  | ,000  | ,000  |
|                              | 502300416            | ,000             | 1,000 | ,000  | ,000  |
|                              | 502300811            | ,000             | ,000  | 1,000 | ,000  |
|                              | 502300913            | ,000             | ,000  | ,000  | 1,000 |
| sv7 sjättedelar för standard | 1 fjärde sjundedelen |                  |       |       |       |
|                              | 2 första sjundedelen |                  |       |       |       |

**Categorical Variables Codings**

|                      | Frequency | Parameter coding |       |       |
|----------------------|-----------|------------------|-------|-------|
|                      |           | (1)              | (2)   | (3)   |
| 3 andra sjundedelen  | 1238      | ,000             | 1,000 | ,000  |
| 4 tredje sjundedelen | 1255      | ,000             | ,000  | 1,000 |
| 5 femte sjundedelen  | 1445      | ,000             | ,000  | ,000  |
| 6 sjätte sjundedelen | 1948      | ,000             | ,000  | ,000  |
| 7 sjunde sjundedelen | 2135      | ,000             | ,000  | ,000  |

**Categorical Variables Codings**

|                      | Frequency | Parameter coding |       |      |     |
|----------------------|-----------|------------------|-------|------|-----|
|                      |           | (4)              | (5)   | (6)  | (7) |
| 3 andra sjundedelen  | ,000      | ,000             | ,000  | ,000 |     |
| 4 tredje sjundedelen | ,000      | ,000             | ,000  | ,000 |     |
| 5 femte sjundedelen  | 1,000     | ,000             | ,000  | ,000 |     |
| 6 sjätte sjundedelen | ,000      | 1,000            | ,000  | ,000 |     |
| 7 sjunde sjundedelen | ,000      | ,000             | 1,000 | ,000 |     |

**Categorical Variables Codings**

|                      | Frequency | Parameter coding |     |      |      |
|----------------------|-----------|------------------|-----|------|------|
|                      |           | (8)              | (9) | (10) | (11) |
| 3 andra sjundedelen  |           |                  |     |      |      |
| 4 tredje sjundedelen |           |                  |     |      |      |
| 5 femte sjundedelen  |           |                  |     |      |      |
| 6 sjätte sjundedelen |           |                  |     |      |      |
| 7 sjunde sjundedelen |           |                  |     |      |      |

**Categorical Variables Codings**

|                      | Frequency | Parameter coding |      |      |      |
|----------------------|-----------|------------------|------|------|------|
|                      |           | (12)             | (13) | (14) | (15) |
| 3 andra sjundedelen  |           |                  |      |      |      |
| 4 tredje sjundedelen |           |                  |      |      |      |
| 5 femte sjundedelen  |           |                  |      |      |      |
| 6 sjätte sjundedelen |           |                  |      |      |      |
| 7 sjunde sjundedelen |           |                  |      |      |      |

**Categorical Variables Codings**

|                      | Frequency | Parameter coding |      |      |      |
|----------------------|-----------|------------------|------|------|------|
|                      |           | (16)             | (17) | (18) | (19) |
| 3 andra sjundedelen  |           |                  |      |      |      |
| 4 tredje sjundedelen |           |                  |      |      |      |
| 5 femte sjundedelen  |           |                  |      |      |      |
| 6 sjätte sjundedelen |           |                  |      |      |      |
| 7 sjunde sjundedelen |           |                  |      |      |      |

**Categorical Variables Codings**

|                      | Parameter coding |      |      |      |
|----------------------|------------------|------|------|------|
|                      | (20)             | (21) | (22) | (23) |
| 3 andra sjundedelen  |                  |      |      |      |
| 4 tredje sjundedelen |                  |      |      |      |
| 5 femte sjundedelen  |                  |      |      |      |
| 6 sjätte sjundedelen |                  |      |      |      |
| 7 sjunde sjundedelen |                  |      |      |      |

**Categorical Variables Codings**

|                      | Parameter coding |      |      |      |
|----------------------|------------------|------|------|------|
|                      | (24)             | (25) | (26) | (27) |
| 3 andra sjundedelen  |                  |      |      |      |
| 4 tredje sjundedelen |                  |      |      |      |
| 5 femte sjundedelen  |                  |      |      |      |
| 6 sjätte sjundedelen |                  |      |      |      |
| 7 sjunde sjundedelen |                  |      |      |      |

**Categorical Variables Codings**

|                      | Parameter coding |      |      |      |
|----------------------|------------------|------|------|------|
|                      | (28)             | (29) | (30) | (31) |
| 3 andra sjundedelen  |                  |      |      |      |
| 4 tredje sjundedelen |                  |      |      |      |
| 5 femte sjundedelen  |                  |      |      |      |
| 6 sjätte sjundedelen |                  |      |      |      |
| 7 sjunde sjundedelen |                  |      |      |      |

**Categorical Variables Codings**

|                      | Parameter coding |      |      |      |
|----------------------|------------------|------|------|------|
|                      | (32)             | (33) | (34) | (35) |
| 3 andra sjundedelen  |                  |      |      |      |
| 4 tredje sjundedelen |                  |      |      |      |
| 5 femte sjundedelen  |                  |      |      |      |
| 6 sjätte sjundedelen |                  |      |      |      |
| 7 sjunde sjundedelen |                  |      |      |      |

**Block 0: Beginning Block**

Classification Table<sup>a,b</sup>

| Observed           |                              |                     | Predicted        |                     |
|--------------------|------------------------------|---------------------|------------------|---------------------|
|                    |                              |                     | 0 ingen hændelse | 1 minst en hændelse |
| Step 0             | hand01 hændelse nej eller ja | 0 ingen hændelse    | 11108            | 0                   |
|                    |                              | 1 minst en hændelse | 1367             | 0                   |
| Overall Percentage |                              |                     |                  |                     |

Classification Table<sup>a,b</sup>

| Observed           |                              |                     | Predicted          |
|--------------------|------------------------------|---------------------|--------------------|
|                    |                              |                     | Percentage Correct |
| Step 0             | hand01 hændelse nej eller ja | 0 ingen hændelse    | 100,0              |
|                    |                              | 1 minst en hændelse | ,0                 |
| Overall Percentage |                              |                     | 89,0               |

a. Constant is included in the model.

b. The cut value is ,500

Variables in the Equation

|                 | B      | S.E. | Wald     | df | Sig. | Exp(B) |
|-----------------|--------|------|----------|----|------|--------|
| Step 0 Constant | -2,095 | ,029 | 5342,584 | 1  | ,000 | ,123   |

## Variables not in the Equation

|        |           |            | Score   | df | Sig. |
|--------|-----------|------------|---------|----|------|
| Step 0 | Variables | sv7        | 43,959  | 6  | ,000 |
|        |           | sv7(1)     | 36,287  | 1  | ,000 |
|        |           | sv7(2)     | ,199    | 1  | ,655 |
|        |           | sv7(3)     | ,113    | 1  | ,737 |
|        |           | sv7(4)     | ,601    | 1  | ,438 |
|        |           | sv7(5)     | 10,247  | 1  | ,001 |
|        |           | sv7(6)     | 5,949   | 1  | ,015 |
|        |           | VASTY2     | 541,214 | 35 | ,000 |
|        |           | VASTY2(1)  | 1,169   | 1  | ,280 |
|        |           | VASTY2(2)  | 87,511  | 1  | ,000 |
|        |           | VASTY2(3)  | 13,995  | 1  | ,000 |
|        |           | VASTY2(4)  | ,464    | 1  | ,496 |
|        |           | VASTY2(5)  | 5,526   | 1  | ,019 |
|        |           | VASTY2(6)  | 19,435  | 1  | ,000 |
|        |           | VASTY2(7)  | 86,074  | 1  | ,000 |
|        |           | VASTY2(8)  | 1,043   | 1  | ,307 |
|        |           | VASTY2(9)  | ,408    | 1  | ,523 |
|        |           | VASTY2(10) | 58,583  | 1  | ,000 |
|        |           | VASTY2(11) | 33,445  | 1  | ,000 |
|        |           | VASTY2(12) | ,029    | 1  | ,865 |
|        |           | VASTY2(13) | 33,445  | 1  | ,000 |
|        |           | VASTY2(14) | 4,163   | 1  | ,041 |
|        |           | VASTY2(15) | ,464    | 1  | ,496 |
|        |           | VASTY2(16) | ,763    | 1  | ,382 |
|        |           | VASTY2(17) | 24,320  | 1  | ,000 |
|        |           | VASTY2(18) | 17,742  | 1  | ,000 |
|        |           | VASTY2(19) | 27,791  | 1  | ,000 |
|        |           | VASTY2(20) | ,015    | 1  | ,902 |
|        |           | VASTY2(21) | 2,890   | 1  | ,089 |
|        |           | VASTY2(22) | ,462    | 1  | ,497 |
|        |           | VASTY2(23) | 15,306  | 1  | ,000 |
|        |           | VASTY2(24) | 12,594  | 1  | ,000 |
|        |           | VASTY2(25) | ,128    | 1  | ,720 |
|        |           | VASTY2(26) | 12,864  | 1  | ,000 |
|        |           | VASTY2(27) | 24,439  | 1  | ,000 |
|        |           | VASTY2(28) | 9,963   | 1  | ,002 |
|        |           | VASTY2(29) | 18,184  | 1  | ,000 |
|        |           | VASTY2(30) | ,486    | 1  | ,486 |
|        |           | VASTY2(31) | 6,400   | 1  | ,011 |
|        |           | VASTY2(32) | 1,626   | 1  | ,202 |
|        |           | VASTY2(33) | 1,336   | 1  | ,248 |
|        |           | VASTY2(34) | 29,489  | 1  | ,000 |
|        |           | VASTY2(35) | 3,668   | 1  | ,055 |

## Variables not in the Equation

|                    | Score   | df | Sig. |
|--------------------|---------|----|------|
| Overall Statistics | 567,788 | 41 | ,000 |

## Block 1: Method = Enter

## Omnibus Tests of Model Coefficients

|             | Chi-square | df | Sig. |
|-------------|------------|----|------|
| Step 1 Step | 564,160    | 41 | ,000 |
| Block       | 564,160    | 41 | ,000 |
| Model       | 564,160    | 41 | ,000 |

## Model Summary

| Step | -2 Log likelihood     | Cox & Snell R Square | Nagelkerke R Square |
|------|-----------------------|----------------------|---------------------|
| 1    | 8059,422 <sup>a</sup> | ,044                 | ,089                |

a. Estimation terminated at iteration number 6 because parameter estimates changed by less than ,001.

Classification Table<sup>a</sup>

| Observed           |                              | Predicted        |                     |
|--------------------|------------------------------|------------------|---------------------|
|                    |                              | 0 ingen hændelse | 1 minst en hændelse |
| Step 1             | hand01 hændelse nej eller ja | 11108            | 0                   |
|                    |                              | 1367             | 0                   |
| Overall Percentage |                              |                  |                     |

Classification Table<sup>a</sup>

| Observed           |                              | Predicted          |
|--------------------|------------------------------|--------------------|
|                    |                              | Percentage Correct |
| Step 1             | hand01 hændelse nej eller ja | 100,0              |
|                    |                              | ,0                 |
| Overall Percentage |                              | 89,0               |

a. The cut value is ,500

## Variables in the Equation

|                         | B      | S.E. | Wald    | df | Sig. | Exp(B) |
|-------------------------|--------|------|---------|----|------|--------|
| Step 1 <sup>a</sup> sv7 |        |      | 25,503  | 6  | ,000 |        |
| sv7(1)                  | -,325  | ,124 | 6,831   | 1  | ,009 | ,723   |
| sv7(2)                  | -,076  | ,126 | ,361    | 1  | ,548 | ,927   |
| sv7(3)                  | -,121  | ,125 | ,927    | 1  | ,336 | ,886   |
| sv7(4)                  | -,056  | ,119 | ,224    | 1  | ,636 | ,945   |
| sv7(5)                  | ,047   | ,112 | ,176    | 1  | ,674 | 1,048  |
| sv7(6)                  | ,344   | ,125 | 7,528   | 1  | ,006 | 1,410  |
| VASTY2                  |        |      | 432,430 | 35 | ,000 |        |
| VASTY2(1)               | ,293   | ,241 | 1,484   | 1  | ,223 | 1,341  |
| VASTY2(2)               | 1,034  | ,222 | 21,724  | 1  | ,000 | 2,812  |
| VASTY2(3)               | -,668  | ,302 | 4,901   | 1  | ,027 | ,513   |
| VASTY2(4)               | ,304   | ,242 | 1,574   | 1  | ,210 | 1,355  |
| VASTY2(5)               | -,237  | ,283 | ,699    | 1  | ,403 | ,789   |
| VASTY2(6)               | -1,270 | ,336 | 14,239  | 1  | ,000 | ,281   |
| VASTY2(7)               | 1,259  | ,217 | 33,714  | 1  | ,000 | 3,520  |
| VASTY2(8)               | ,377   | ,241 | 2,454   | 1  | ,117 | 1,458  |
| VASTY2(9)               | ,283   | ,246 | 1,330   | 1  | ,249 | 1,327  |
| VASTY2(10)              | ,847   | ,226 | 13,989  | 1  | ,000 | 2,333  |
| VASTY2(11)              | ,916   | ,223 | 16,906  | 1  | ,000 | 2,499  |
| VASTY2(12)              | ,001   | ,251 | ,000    | 1  | ,997 | 1,001  |
| VASTY2(13)              | ,657   | ,231 | 8,102   | 1  | ,004 | 1,929  |
| VASTY2(14)              | -,347  | ,269 | 1,662   | 1  | ,197 | ,707   |
| VASTY2(15)              | ,094   | ,247 | ,146    | 1  | ,702 | 1,099  |
| VASTY2(16)              | ,287   | ,290 | ,979    | 1  | ,322 | 1,332  |
| VASTY2(17)              | -1,169 | ,356 | 10,782  | 1  | ,001 | ,311   |
| VASTY2(18)              | -,619  | ,331 | 3,504   | 1  | ,061 | ,539   |
| VASTY2(19)              | -1,140 | ,393 | 8,403   | 1  | ,004 | ,320   |
| VASTY2(20)              | -,004  | ,264 | ,000    | 1  | ,986 | ,996   |
| VASTY2(21)              | -,102  | ,263 | ,151    | 1  | ,698 | ,903   |
| VASTY2(22)              | ,057   | ,252 | ,052    | 1  | ,820 | 1,059  |
| VASTY2(23)              | ,734   | ,228 | 10,398  | 1  | ,001 | 2,084  |
| VASTY2(24)              | ,584   | ,230 | 6,482   | 1  | ,011 | 1,794  |
| VASTY2(25)              | ,164   | ,265 | ,381    | 1  | ,537 | 1,178  |
| VASTY2(26)              | -,809  | ,337 | 5,781   | 1  | ,016 | ,445   |
| VASTY2(27)              | -1,377 | ,359 | 14,731  | 1  | ,000 | ,252   |
| VASTY2(28)              | -1,174 | ,382 | 9,468   | 1  | ,002 | ,309   |
| VASTY2(29)              | -1,274 | ,333 | 14,612  | 1  | ,000 | ,280   |
| VASTY2(30)              | ,113   | ,253 | ,200    | 1  | ,655 | 1,119  |
| VASTY2(31)              | ,729   | ,241 | 9,166   | 1  | ,002 | 2,073  |
| VASTY2(32)              | ,195   | ,272 | ,514    | 1  | ,473 | 1,215  |
| VASTY2(33)              | ,235   | ,272 | ,743    | 1  | ,389 | 1,265  |
| VASTY2(34)              | -1,526 | ,400 | 14,519  | 1  | ,000 | ,217   |



Variables in the Equation

|                     |            | 95% C.I. for EXP(B) |       |
|---------------------|------------|---------------------|-------|
|                     |            | Lower               | Upper |
| Step 1 <sup>a</sup> | sv7        |                     |       |
|                     | sv7(1)     | ,566                | ,922  |
|                     | sv7(2)     | ,723                | 1,188 |
|                     | sv7(3)     | ,694                | 1,133 |
|                     | sv7(4)     | ,749                | 1,193 |
|                     | sv7(5)     | ,841                | 1,306 |
|                     | sv7(6)     | 1,103               | 1,803 |
|                     | VASTY2     |                     |       |
|                     | VASTY2(1)  | ,836                | 2,150 |
|                     | VASTY2(2)  | 1,820               | 4,343 |
|                     | VASTY2(3)  | ,284                | ,926  |
|                     | VASTY2(4)  | ,843                | 2,177 |
|                     | VASTY2(5)  | ,453                | 1,374 |
|                     | VASTY2(6)  | ,145                | ,543  |
|                     | VASTY2(7)  | 2,302               | 5,383 |
|                     | VASTY2(8)  | ,910                | 2,337 |
|                     | VASTY2(9)  | ,820                | 2,148 |
|                     | VASTY2(10) | 1,497               | 3,636 |
|                     | VASTY2(11) | 1,615               | 3,868 |
|                     | VASTY2(12) | ,613                | 1,636 |
|                     | VASTY2(13) | 1,227               | 3,032 |
|                     | VASTY2(14) | ,417                | 1,198 |
|                     | VASTY2(15) | ,677                | 1,783 |
|                     | VASTY2(16) | ,755                | 2,352 |
|                     | VASTY2(17) | ,155                | ,624  |
|                     | VASTY2(18) | ,282                | 1,030 |
|                     | VASTY2(19) | ,148                | ,691  |
|                     | VASTY2(20) | ,594                | 1,669 |
|                     | VASTY2(21) | ,540                | 1,511 |
|                     | VASTY2(22) | ,647                | 1,734 |
|                     | VASTY2(23) | 1,334               | 3,256 |
|                     | VASTY2(24) | 1,144               | 2,813 |
|                     | VASTY2(25) | ,701                | 1,980 |
|                     | VASTY2(26) | ,230                | ,861  |
|                     | VASTY2(27) | ,125                | ,510  |
|                     | VASTY2(28) | ,146                | ,653  |
|                     | VASTY2(29) | ,146                | ,538  |
|                     | VASTY2(30) | ,682                | 1,837 |
|                     | VASTY2(31) | 1,293               | 3,323 |
|                     | VASTY2(32) | ,713                | 2,072 |
|                     | VASTY2(33) | ,742                | 2,157 |
|                     | VASTY2(34) | ,099                | ,477  |

review only

## Variables in the Equation

|            | B      | S.E. | Wald    | df | Sig. | Exp(B) |
|------------|--------|------|---------|----|------|--------|
| VASTY2(35) | ,471   | ,243 | 3,759   | 1  | ,053 | 1,602  |
| Constant   | -2,212 | ,194 | 129,865 | 1  | ,000 | ,109   |

## Variables in the Equation

|            | 95% C.I. for EXP(B) |       |
|------------|---------------------|-------|
|            | Lower               | Upper |
| VASTY2(35) | ,995                | 2,578 |
| Constant   |                     |       |

a. Variable(s) entered on step 1: sv7, VASTY2.

\*\*

LOGISTIC REGRESSION VARIABLES luonnelt1

/METHOD=ENTER bv1 VASTY2

/CONTRAST (bv1)=Indicator(1)

/CONTRAST (VASTY2)=Indicator(1)

/PRINT=CI(95)

/CRITERIA=PIN(0.05) POUT(0.10) ITERATE(20) CUT(0.5).

## Logistic Regression

[DataSet6] C:\cWordjan\Rafaela\_VCS\alla\_tillsammans\abo\_bjo\_vasa\_v1.sav

### Case Processing Summary

| Unweighted Cases <sup>a</sup> |                      | N     | Percent |
|-------------------------------|----------------------|-------|---------|
| Selected Cases                | Included in Analysis | 12475 | 100,0   |
|                               | Missing Cases        | 0     | ,0      |
|                               | Total                | 12475 | 100,0   |
| Unselected Cases              |                      | 0     | ,0      |
| Total                         |                      | 12475 | 100,0   |

a. If weight is in effect, see classification table for the total number of cases.

### Dependent Variable Encoding

| Original Value                      | Internal Value |
|-------------------------------------|----------------|
| 0 ingen händelse eller läheltä piti | 0              |
| 1 tapahtui potilaalle               | 1              |

## Categorical Variables Codings

|                                             | Frequency | Parameter coding |       |       |
|---------------------------------------------|-----------|------------------|-------|-------|
|                                             |           | (1)              | (2)   | (3)   |
| VASTY2 (SAIR*10000)+VASTY 403073101         | 365       | ,000             | ,000  | ,000  |
| 403073102                                   | 362       | 1,000            | ,000  | ,000  |
| 403073103                                   | 365       | ,000             | 1,000 | ,000  |
| 403073202                                   | 365       | ,000             | ,000  | 1,000 |
| 403073203                                   | 365       | ,000             | ,000  | ,000  |
| 403073204                                   | 330       | ,000             | ,000  | ,000  |
| 403073303                                   | 364       | ,000             | ,000  | ,000  |
| 403073651                                   | 362       | ,000             | ,000  | ,000  |
| 403073771                                   | 365       | ,000             | ,000  | ,000  |
| 403133102                                   | 341       | ,000             | ,000  | ,000  |
| 403133106                                   | 365       | ,000             | ,000  | ,000  |
| 403133107                                   | 365       | ,000             | ,000  | ,000  |
| 403133109                                   | 365       | ,000             | ,000  | ,000  |
| 403133202                                   | 365       | ,000             | ,000  | ,000  |
| 403133203                                   | 365       | ,000             | ,000  | ,000  |
| 403133204                                   | 365       | ,000             | ,000  | ,000  |
| 403133315                                   | 177       | ,000             | ,000  | ,000  |
| 403133322                                   | 365       | ,000             | ,000  | ,000  |
| 403133401                                   | 362       | ,000             | ,000  | ,000  |
| 403133402                                   | 365       | ,000             | ,000  | ,000  |
| 403133550                                   | 298       | ,000             | ,000  | ,000  |
| 403133772                                   | 365       | ,000             | ,000  | ,000  |
| 403135803                                   | 365       | ,000             | ,000  | ,000  |
| 404060001                                   | 365       | ,000             | ,000  | ,000  |
| 404060002                                   | 366       | ,000             | ,000  | ,000  |
| 404310003                                   | 291       | ,000             | ,000  | ,000  |
| 404310004                                   | 291       | ,000             | ,000  | ,000  |
| 502300005                                   | 366       | ,000             | ,000  | ,000  |
| 502300006                                   | 225       | ,000             | ,000  | ,000  |
| 502300007                                   | 366       | ,000             | ,000  | ,000  |
| 502300214                                   | 366       | ,000             | ,000  | ,000  |
| 502300411                                   | 366       | ,000             | ,000  | ,000  |
| 502300415                                   | 360       | ,000             | ,000  | ,000  |
| 502300416                                   | 363       | ,000             | ,000  | ,000  |
| 502300811                                   | 364       | ,000             | ,000  | ,000  |
| 502300913                                   | 315       | ,000             | ,000  | ,000  |
| bv1 belastning vs paoncil 1 medelbelastning | 5380      | ,000             | ,000  |       |
| 2 underbelastning                           | 3222      | 1,000            | ,000  |       |
| 3 överbelastning                            | 3873      | ,000             | 1,000 |       |

## Categorical Variables Codings

|                           |                   | Parameter coding |       |       |       |
|---------------------------|-------------------|------------------|-------|-------|-------|
|                           |                   | (4)              | (5)   | (6)   | (7)   |
| VASTY2 (SAIR*10000)+VASTY | 403073101         | ,000             | ,000  | ,000  | ,000  |
|                           | 403073102         | ,000             | ,000  | ,000  | ,000  |
|                           | 403073103         | ,000             | ,000  | ,000  | ,000  |
|                           | 403073202         | ,000             | ,000  | ,000  | ,000  |
|                           | 403073203         | 1,000            | ,000  | ,000  | ,000  |
|                           | 403073204         | ,000             | 1,000 | ,000  | ,000  |
|                           | 403073303         | ,000             | ,000  | 1,000 | ,000  |
|                           | 403073651         | ,000             | ,000  | ,000  | 1,000 |
|                           | 403073771         | ,000             | ,000  | ,000  | ,000  |
|                           | 403133102         | ,000             | ,000  | ,000  | ,000  |
|                           | 403133106         | ,000             | ,000  | ,000  | ,000  |
|                           | 403133107         | ,000             | ,000  | ,000  | ,000  |
|                           | 403133109         | ,000             | ,000  | ,000  | ,000  |
|                           | 403133202         | ,000             | ,000  | ,000  | ,000  |
|                           | 403133203         | ,000             | ,000  | ,000  | ,000  |
|                           | 403133204         | ,000             | ,000  | ,000  | ,000  |
|                           | 403133315         | ,000             | ,000  | ,000  | ,000  |
|                           | 403133322         | ,000             | ,000  | ,000  | ,000  |
|                           | 403133401         | ,000             | ,000  | ,000  | ,000  |
|                           | 403133402         | ,000             | ,000  | ,000  | ,000  |
|                           | 403133550         | ,000             | ,000  | ,000  | ,000  |
|                           | 403133772         | ,000             | ,000  | ,000  | ,000  |
|                           | 403135803         | ,000             | ,000  | ,000  | ,000  |
|                           | 404060001         | ,000             | ,000  | ,000  | ,000  |
|                           | 404060002         | ,000             | ,000  | ,000  | ,000  |
|                           | 404310003         | ,000             | ,000  | ,000  | ,000  |
|                           | 404310004         | ,000             | ,000  | ,000  | ,000  |
|                           | 502300005         | ,000             | ,000  | ,000  | ,000  |
|                           | 502300006         | ,000             | ,000  | ,000  | ,000  |
|                           | 502300007         | ,000             | ,000  | ,000  | ,000  |
|                           | 502300214         | ,000             | ,000  | ,000  | ,000  |
|                           | 502300411         | ,000             | ,000  | ,000  | ,000  |
|                           | 502300415         | ,000             | ,000  | ,000  | ,000  |
|                           | 502300416         | ,000             | ,000  | ,000  | ,000  |
|                           | 502300811         | ,000             | ,000  | ,000  | ,000  |
|                           | 502300913         | ,000             | ,000  | ,000  | ,000  |
| bv1 belastning vs paencil | 1 medelbelastning |                  |       |       |       |
|                           | 2 underbelastning |                  |       |       |       |
|                           | 3 överbelastning  |                  |       |       |       |

## Categorical Variables Codings

|                           |                   | Parameter coding |       |       |       |
|---------------------------|-------------------|------------------|-------|-------|-------|
|                           |                   | (8)              | (9)   | (10)  | (11)  |
| VASTY2 (SAIR*10000)+VASTY | 403073101         | ,000             | ,000  | ,000  | ,000  |
|                           | 403073102         | ,000             | ,000  | ,000  | ,000  |
|                           | 403073103         | ,000             | ,000  | ,000  | ,000  |
|                           | 403073202         | ,000             | ,000  | ,000  | ,000  |
|                           | 403073203         | ,000             | ,000  | ,000  | ,000  |
|                           | 403073204         | ,000             | ,000  | ,000  | ,000  |
|                           | 403073303         | ,000             | ,000  | ,000  | ,000  |
|                           | 403073651         | ,000             | ,000  | ,000  | ,000  |
|                           | 403073771         | 1,000            | ,000  | ,000  | ,000  |
|                           | 403133102         | ,000             | 1,000 | ,000  | ,000  |
|                           | 403133106         | ,000             | ,000  | 1,000 | ,000  |
|                           | 403133107         | ,000             | ,000  | ,000  | 1,000 |
|                           | 403133109         | ,000             | ,000  | ,000  | ,000  |
|                           | 403133202         | ,000             | ,000  | ,000  | ,000  |
|                           | 403133203         | ,000             | ,000  | ,000  | ,000  |
|                           | 403133204         | ,000             | ,000  | ,000  | ,000  |
|                           | 403133315         | ,000             | ,000  | ,000  | ,000  |
|                           | 403133322         | ,000             | ,000  | ,000  | ,000  |
|                           | 403133401         | ,000             | ,000  | ,000  | ,000  |
|                           | 403133402         | ,000             | ,000  | ,000  | ,000  |
|                           | 403133550         | ,000             | ,000  | ,000  | ,000  |
|                           | 403133772         | ,000             | ,000  | ,000  | ,000  |
|                           | 403135803         | ,000             | ,000  | ,000  | ,000  |
|                           | 404060001         | ,000             | ,000  | ,000  | ,000  |
|                           | 404060002         | ,000             | ,000  | ,000  | ,000  |
|                           | 404310003         | ,000             | ,000  | ,000  | ,000  |
|                           | 404310004         | ,000             | ,000  | ,000  | ,000  |
|                           | 502300005         | ,000             | ,000  | ,000  | ,000  |
|                           | 502300006         | ,000             | ,000  | ,000  | ,000  |
|                           | 502300007         | ,000             | ,000  | ,000  | ,000  |
|                           | 502300214         | ,000             | ,000  | ,000  | ,000  |
|                           | 502300411         | ,000             | ,000  | ,000  | ,000  |
|                           | 502300415         | ,000             | ,000  | ,000  | ,000  |
|                           | 502300416         | ,000             | ,000  | ,000  | ,000  |
|                           | 502300811         | ,000             | ,000  | ,000  | ,000  |
|                           | 502300913         | ,000             | ,000  | ,000  | ,000  |
| bv1 belastning vs paencil | 1 medelbelastning |                  |       |       |       |
|                           | 2 underbelastning |                  |       |       |       |
|                           | 3 överbelastning  |                  |       |       |       |

## Categorical Variables Codings

|                           |                   | Parameter coding |       |       |       |
|---------------------------|-------------------|------------------|-------|-------|-------|
|                           |                   | (12)             | (13)  | (14)  | (15)  |
| VASTY2 (SAIR*10000)+VASTY | 403073101         | ,000             | ,000  | ,000  | ,000  |
|                           | 403073102         | ,000             | ,000  | ,000  | ,000  |
|                           | 403073103         | ,000             | ,000  | ,000  | ,000  |
|                           | 403073202         | ,000             | ,000  | ,000  | ,000  |
|                           | 403073203         | ,000             | ,000  | ,000  | ,000  |
|                           | 403073204         | ,000             | ,000  | ,000  | ,000  |
|                           | 403073303         | ,000             | ,000  | ,000  | ,000  |
|                           | 403073651         | ,000             | ,000  | ,000  | ,000  |
|                           | 403073771         | ,000             | ,000  | ,000  | ,000  |
|                           | 403133102         | ,000             | ,000  | ,000  | ,000  |
|                           | 403133106         | ,000             | ,000  | ,000  | ,000  |
|                           | 403133107         | ,000             | ,000  | ,000  | ,000  |
|                           | 403133109         | 1,000            | ,000  | ,000  | ,000  |
|                           | 403133202         | ,000             | 1,000 | ,000  | ,000  |
|                           | 403133203         | ,000             | ,000  | 1,000 | ,000  |
|                           | 403133204         | ,000             | ,000  | ,000  | 1,000 |
|                           | 403133315         | ,000             | ,000  | ,000  | ,000  |
|                           | 403133322         | ,000             | ,000  | ,000  | ,000  |
|                           | 403133401         | ,000             | ,000  | ,000  | ,000  |
|                           | 403133402         | ,000             | ,000  | ,000  | ,000  |
|                           | 403133550         | ,000             | ,000  | ,000  | ,000  |
|                           | 403133772         | ,000             | ,000  | ,000  | ,000  |
|                           | 403135803         | ,000             | ,000  | ,000  | ,000  |
|                           | 404060001         | ,000             | ,000  | ,000  | ,000  |
|                           | 404060002         | ,000             | ,000  | ,000  | ,000  |
|                           | 404310003         | ,000             | ,000  | ,000  | ,000  |
|                           | 404310004         | ,000             | ,000  | ,000  | ,000  |
|                           | 502300005         | ,000             | ,000  | ,000  | ,000  |
|                           | 502300006         | ,000             | ,000  | ,000  | ,000  |
|                           | 502300007         | ,000             | ,000  | ,000  | ,000  |
|                           | 502300214         | ,000             | ,000  | ,000  | ,000  |
|                           | 502300411         | ,000             | ,000  | ,000  | ,000  |
|                           | 502300415         | ,000             | ,000  | ,000  | ,000  |
|                           | 502300416         | ,000             | ,000  | ,000  | ,000  |
|                           | 502300811         | ,000             | ,000  | ,000  | ,000  |
|                           | 502300913         | ,000             | ,000  | ,000  | ,000  |
| bv1 belastning vs paencil | 1 medelbelastning |                  |       |       |       |
|                           | 2 underbelastning |                  |       |       |       |
|                           | 3 överbelastning  |                  |       |       |       |

## Categorical Variables Codings

|                           |                   | Parameter coding |       |       |       |
|---------------------------|-------------------|------------------|-------|-------|-------|
|                           |                   | (16)             | (17)  | (18)  | (19)  |
| VASTY2 (SAIR*10000)+VASTY | 403073101         | ,000             | ,000  | ,000  | ,000  |
|                           | 403073102         | ,000             | ,000  | ,000  | ,000  |
|                           | 403073103         | ,000             | ,000  | ,000  | ,000  |
|                           | 403073202         | ,000             | ,000  | ,000  | ,000  |
|                           | 403073203         | ,000             | ,000  | ,000  | ,000  |
|                           | 403073204         | ,000             | ,000  | ,000  | ,000  |
|                           | 403073303         | ,000             | ,000  | ,000  | ,000  |
|                           | 403073651         | ,000             | ,000  | ,000  | ,000  |
|                           | 403073771         | ,000             | ,000  | ,000  | ,000  |
|                           | 403133102         | ,000             | ,000  | ,000  | ,000  |
|                           | 403133106         | ,000             | ,000  | ,000  | ,000  |
|                           | 403133107         | ,000             | ,000  | ,000  | ,000  |
|                           | 403133109         | ,000             | ,000  | ,000  | ,000  |
|                           | 403133202         | ,000             | ,000  | ,000  | ,000  |
|                           | 403133203         | ,000             | ,000  | ,000  | ,000  |
|                           | 403133204         | ,000             | ,000  | ,000  | ,000  |
|                           | 403133315         | 1,000            | ,000  | ,000  | ,000  |
|                           | 403133322         | ,000             | 1,000 | ,000  | ,000  |
|                           | 403133401         | ,000             | ,000  | 1,000 | ,000  |
|                           | 403133402         | ,000             | ,000  | ,000  | 1,000 |
|                           | 403133550         | ,000             | ,000  | ,000  | ,000  |
|                           | 403133772         | ,000             | ,000  | ,000  | ,000  |
|                           | 403135803         | ,000             | ,000  | ,000  | ,000  |
|                           | 404060001         | ,000             | ,000  | ,000  | ,000  |
|                           | 404060002         | ,000             | ,000  | ,000  | ,000  |
|                           | 404310003         | ,000             | ,000  | ,000  | ,000  |
|                           | 404310004         | ,000             | ,000  | ,000  | ,000  |
|                           | 502300005         | ,000             | ,000  | ,000  | ,000  |
|                           | 502300006         | ,000             | ,000  | ,000  | ,000  |
|                           | 502300007         | ,000             | ,000  | ,000  | ,000  |
|                           | 502300214         | ,000             | ,000  | ,000  | ,000  |
|                           | 502300411         | ,000             | ,000  | ,000  | ,000  |
|                           | 502300415         | ,000             | ,000  | ,000  | ,000  |
|                           | 502300416         | ,000             | ,000  | ,000  | ,000  |
|                           | 502300811         | ,000             | ,000  | ,000  | ,000  |
|                           | 502300913         | ,000             | ,000  | ,000  | ,000  |
| bv1 belastning vs paencil | 1 medelbelastning |                  |       |       |       |
|                           | 2 underbelastning |                  |       |       |       |
|                           | 3 överbelastning  |                  |       |       |       |

## Categorical Variables Codings

|                           |                   | Parameter coding |       |       |       |
|---------------------------|-------------------|------------------|-------|-------|-------|
|                           |                   | (20)             | (21)  | (22)  | (23)  |
| VASTY2 (SAIR*10000)+VASTY | 403073101         | ,000             | ,000  | ,000  | ,000  |
|                           | 403073102         | ,000             | ,000  | ,000  | ,000  |
|                           | 403073103         | ,000             | ,000  | ,000  | ,000  |
|                           | 403073202         | ,000             | ,000  | ,000  | ,000  |
|                           | 403073203         | ,000             | ,000  | ,000  | ,000  |
|                           | 403073204         | ,000             | ,000  | ,000  | ,000  |
|                           | 403073303         | ,000             | ,000  | ,000  | ,000  |
|                           | 403073651         | ,000             | ,000  | ,000  | ,000  |
|                           | 403073771         | ,000             | ,000  | ,000  | ,000  |
|                           | 403133102         | ,000             | ,000  | ,000  | ,000  |
|                           | 403133106         | ,000             | ,000  | ,000  | ,000  |
|                           | 403133107         | ,000             | ,000  | ,000  | ,000  |
|                           | 403133109         | ,000             | ,000  | ,000  | ,000  |
|                           | 403133202         | ,000             | ,000  | ,000  | ,000  |
|                           | 403133203         | ,000             | ,000  | ,000  | ,000  |
|                           | 403133204         | ,000             | ,000  | ,000  | ,000  |
|                           | 403133315         | ,000             | ,000  | ,000  | ,000  |
|                           | 403133322         | ,000             | ,000  | ,000  | ,000  |
|                           | 403133401         | ,000             | ,000  | ,000  | ,000  |
|                           | 403133402         | ,000             | ,000  | ,000  | ,000  |
|                           | 403133550         | 1,000            | ,000  | ,000  | ,000  |
|                           | 403133772         | ,000             | 1,000 | ,000  | ,000  |
|                           | 403135803         | ,000             | ,000  | 1,000 | ,000  |
|                           | 404060001         | ,000             | ,000  | ,000  | 1,000 |
|                           | 404060002         | ,000             | ,000  | ,000  | ,000  |
|                           | 404310003         | ,000             | ,000  | ,000  | ,000  |
|                           | 404310004         | ,000             | ,000  | ,000  | ,000  |
|                           | 502300005         | ,000             | ,000  | ,000  | ,000  |
|                           | 502300006         | ,000             | ,000  | ,000  | ,000  |
|                           | 502300007         | ,000             | ,000  | ,000  | ,000  |
|                           | 502300214         | ,000             | ,000  | ,000  | ,000  |
|                           | 502300411         | ,000             | ,000  | ,000  | ,000  |
|                           | 502300415         | ,000             | ,000  | ,000  | ,000  |
|                           | 502300416         | ,000             | ,000  | ,000  | ,000  |
|                           | 502300811         | ,000             | ,000  | ,000  | ,000  |
|                           | 502300913         | ,000             | ,000  | ,000  | ,000  |
| bv1 belastning vs paencil | 1 medelbelastning |                  |       |       |       |
|                           | 2 underbelastning |                  |       |       |       |
|                           | 3 överbelastning  |                  |       |       |       |



## Categorical Variables Codings

|                           |                   | Parameter coding |       |       |       |
|---------------------------|-------------------|------------------|-------|-------|-------|
|                           |                   | (24)             | (25)  | (26)  | (27)  |
| VASTY2 (SAIR*10000)+VASTY | 403073101         | ,000             | ,000  | ,000  | ,000  |
|                           | 403073102         | ,000             | ,000  | ,000  | ,000  |
|                           | 403073103         | ,000             | ,000  | ,000  | ,000  |
|                           | 403073202         | ,000             | ,000  | ,000  | ,000  |
|                           | 403073203         | ,000             | ,000  | ,000  | ,000  |
|                           | 403073204         | ,000             | ,000  | ,000  | ,000  |
|                           | 403073303         | ,000             | ,000  | ,000  | ,000  |
|                           | 403073651         | ,000             | ,000  | ,000  | ,000  |
|                           | 403073771         | ,000             | ,000  | ,000  | ,000  |
|                           | 403133102         | ,000             | ,000  | ,000  | ,000  |
|                           | 403133106         | ,000             | ,000  | ,000  | ,000  |
|                           | 403133107         | ,000             | ,000  | ,000  | ,000  |
|                           | 403133109         | ,000             | ,000  | ,000  | ,000  |
|                           | 403133202         | ,000             | ,000  | ,000  | ,000  |
|                           | 403133203         | ,000             | ,000  | ,000  | ,000  |
|                           | 403133204         | ,000             | ,000  | ,000  | ,000  |
|                           | 403133315         | ,000             | ,000  | ,000  | ,000  |
|                           | 403133322         | ,000             | ,000  | ,000  | ,000  |
|                           | 403133401         | ,000             | ,000  | ,000  | ,000  |
|                           | 403133402         | ,000             | ,000  | ,000  | ,000  |
|                           | 403133550         | ,000             | ,000  | ,000  | ,000  |
|                           | 403133772         | ,000             | ,000  | ,000  | ,000  |
|                           | 403135803         | ,000             | ,000  | ,000  | ,000  |
|                           | 404060001         | ,000             | ,000  | ,000  | ,000  |
|                           | 404060002         | 1,000            | ,000  | ,000  | ,000  |
|                           | 404310003         | ,000             | 1,000 | ,000  | ,000  |
|                           | 404310004         | ,000             | ,000  | 1,000 | ,000  |
|                           | 502300005         | ,000             | ,000  | ,000  | 1,000 |
|                           | 502300006         | ,000             | ,000  | ,000  | ,000  |
|                           | 502300007         | ,000             | ,000  | ,000  | ,000  |
|                           | 502300214         | ,000             | ,000  | ,000  | ,000  |
|                           | 502300411         | ,000             | ,000  | ,000  | ,000  |
|                           | 502300415         | ,000             | ,000  | ,000  | ,000  |
|                           | 502300416         | ,000             | ,000  | ,000  | ,000  |
|                           | 502300811         | ,000             | ,000  | ,000  | ,000  |
|                           | 502300913         | ,000             | ,000  | ,000  | ,000  |
| bv1 belastning vs paencil | 1 medelbelastning |                  |       |       |       |
|                           | 2 underbelastning |                  |       |       |       |
|                           | 3 överbelastning  |                  |       |       |       |

## Categorical Variables Codings

|                           |                   | Parameter coding |       |       |       |
|---------------------------|-------------------|------------------|-------|-------|-------|
|                           |                   | (28)             | (29)  | (30)  | (31)  |
| VASTY2 (SAIR*10000)+VASTY | 403073101         | ,000             | ,000  | ,000  | ,000  |
|                           | 403073102         | ,000             | ,000  | ,000  | ,000  |
|                           | 403073103         | ,000             | ,000  | ,000  | ,000  |
|                           | 403073202         | ,000             | ,000  | ,000  | ,000  |
|                           | 403073203         | ,000             | ,000  | ,000  | ,000  |
|                           | 403073204         | ,000             | ,000  | ,000  | ,000  |
|                           | 403073303         | ,000             | ,000  | ,000  | ,000  |
|                           | 403073651         | ,000             | ,000  | ,000  | ,000  |
|                           | 403073771         | ,000             | ,000  | ,000  | ,000  |
|                           | 403133102         | ,000             | ,000  | ,000  | ,000  |
|                           | 403133106         | ,000             | ,000  | ,000  | ,000  |
|                           | 403133107         | ,000             | ,000  | ,000  | ,000  |
|                           | 403133109         | ,000             | ,000  | ,000  | ,000  |
|                           | 403133202         | ,000             | ,000  | ,000  | ,000  |
|                           | 403133203         | ,000             | ,000  | ,000  | ,000  |
|                           | 403133204         | ,000             | ,000  | ,000  | ,000  |
|                           | 403133315         | ,000             | ,000  | ,000  | ,000  |
|                           | 403133322         | ,000             | ,000  | ,000  | ,000  |
|                           | 403133401         | ,000             | ,000  | ,000  | ,000  |
|                           | 403133402         | ,000             | ,000  | ,000  | ,000  |
|                           | 403133550         | ,000             | ,000  | ,000  | ,000  |
|                           | 403133772         | ,000             | ,000  | ,000  | ,000  |
|                           | 403135803         | ,000             | ,000  | ,000  | ,000  |
|                           | 404060001         | ,000             | ,000  | ,000  | ,000  |
|                           | 404060002         | ,000             | ,000  | ,000  | ,000  |
|                           | 404310003         | ,000             | ,000  | ,000  | ,000  |
|                           | 404310004         | ,000             | ,000  | ,000  | ,000  |
|                           | 502300005         | ,000             | ,000  | ,000  | ,000  |
|                           | 502300006         | 1,000            | ,000  | ,000  | ,000  |
|                           | 502300007         | ,000             | 1,000 | ,000  | ,000  |
|                           | 502300214         | ,000             | ,000  | 1,000 | ,000  |
|                           | 502300411         | ,000             | ,000  | ,000  | 1,000 |
|                           | 502300415         | ,000             | ,000  | ,000  | ,000  |
|                           | 502300416         | ,000             | ,000  | ,000  | ,000  |
|                           | 502300811         | ,000             | ,000  | ,000  | ,000  |
|                           | 502300913         | ,000             | ,000  | ,000  | ,000  |
| bv1 belastning vs paencil | 1 medelbelastning |                  |       |       |       |
|                           | 2 underbelastning |                  |       |       |       |
|                           | 3 överbelastning  |                  |       |       |       |

## Categorical Variables Codings

|                           |                   | Parameter coding |       |       |       |
|---------------------------|-------------------|------------------|-------|-------|-------|
|                           |                   | (32)             | (33)  | (34)  | (35)  |
| VASTY2 (SAIR*10000)+VASTY | 403073101         | ,000             | ,000  | ,000  | ,000  |
|                           | 403073102         | ,000             | ,000  | ,000  | ,000  |
|                           | 403073103         | ,000             | ,000  | ,000  | ,000  |
|                           | 403073202         | ,000             | ,000  | ,000  | ,000  |
|                           | 403073203         | ,000             | ,000  | ,000  | ,000  |
|                           | 403073204         | ,000             | ,000  | ,000  | ,000  |
|                           | 403073303         | ,000             | ,000  | ,000  | ,000  |
|                           | 403073651         | ,000             | ,000  | ,000  | ,000  |
|                           | 403073771         | ,000             | ,000  | ,000  | ,000  |
|                           | 403133102         | ,000             | ,000  | ,000  | ,000  |
|                           | 403133106         | ,000             | ,000  | ,000  | ,000  |
|                           | 403133107         | ,000             | ,000  | ,000  | ,000  |
|                           | 403133109         | ,000             | ,000  | ,000  | ,000  |
|                           | 403133202         | ,000             | ,000  | ,000  | ,000  |
|                           | 403133203         | ,000             | ,000  | ,000  | ,000  |
|                           | 403133204         | ,000             | ,000  | ,000  | ,000  |
|                           | 403133315         | ,000             | ,000  | ,000  | ,000  |
|                           | 403133322         | ,000             | ,000  | ,000  | ,000  |
|                           | 403133401         | ,000             | ,000  | ,000  | ,000  |
|                           | 403133402         | ,000             | ,000  | ,000  | ,000  |
|                           | 403133550         | ,000             | ,000  | ,000  | ,000  |
|                           | 403133772         | ,000             | ,000  | ,000  | ,000  |
|                           | 403135803         | ,000             | ,000  | ,000  | ,000  |
|                           | 404060001         | ,000             | ,000  | ,000  | ,000  |
|                           | 404060002         | ,000             | ,000  | ,000  | ,000  |
|                           | 404310003         | ,000             | ,000  | ,000  | ,000  |
|                           | 404310004         | ,000             | ,000  | ,000  | ,000  |
|                           | 502300005         | ,000             | ,000  | ,000  | ,000  |
|                           | 502300006         | ,000             | ,000  | ,000  | ,000  |
|                           | 502300007         | ,000             | ,000  | ,000  | ,000  |
|                           | 502300214         | ,000             | ,000  | ,000  | ,000  |
|                           | 502300411         | ,000             | ,000  | ,000  | ,000  |
|                           | 502300415         | 1,000            | ,000  | ,000  | ,000  |
|                           | 502300416         | ,000             | 1,000 | ,000  | ,000  |
|                           | 502300811         | ,000             | ,000  | 1,000 | ,000  |
|                           | 502300913         | ,000             | ,000  | ,000  | 1,000 |
| bv1 belastning vs paencil | 1 medelbelastning |                  |       |       |       |
|                           | 2 underbelastning |                  |       |       |       |
|                           | 3 överbelastning  |                  |       |       |       |

**Block 0: Beginning Block**

Classification Table<sup>a,b</sup>

| Observed           |                                                |                                                              |
|--------------------|------------------------------------------------|--------------------------------------------------------------|
| Step 0             | luonnelt1 luonne highest = tapahtui potilaalle | 0 ingen händelse eller läheltä piti<br>1 tapahtui potilaalle |
| Overall Percentage |                                                |                                                              |

Classification Table<sup>a,b</sup>

| Observed           |                                                | Predicted                                                    |              |
|--------------------|------------------------------------------------|--------------------------------------------------------------|--------------|
|                    |                                                | luonnelt1 luonne highest = ...                               |              |
|                    |                                                | 0 ingen händelse eller läheltä piti                          |              |
| Step 0             | luonnelt1 luonne highest = tapahtui potilaalle | 0 ingen händelse eller läheltä piti<br>1 tapahtui potilaalle | 11627<br>848 |
| Overall Percentage |                                                |                                                              |              |

Classification Table<sup>a,b</sup>

| Observed           |                                                | Predicted                                                    |        |
|--------------------|------------------------------------------------|--------------------------------------------------------------|--------|
|                    |                                                | luonnelt1 luonne highest ...                                 |        |
|                    |                                                | 1 tapahtui potilaalle                                        |        |
| Step 0             | luonnelt1 luonne highest = tapahtui potilaalle | 0 ingen händelse eller läheltä piti<br>1 tapahtui potilaalle | 0<br>0 |
| Overall Percentage |                                                |                                                              |        |

Classification Table<sup>a,b</sup>

| Observed           |                                                | Predicted                                                    |             |
|--------------------|------------------------------------------------|--------------------------------------------------------------|-------------|
|                    |                                                | Percentage Correct                                           |             |
| Step 0             | luonnelt1 luonne highest = tapahtui potilaalle | 0 ingen händelse eller läheltä piti<br>1 tapahtui potilaalle | 100,0<br>,0 |
| Overall Percentage |                                                | 93,2                                                         |             |

a. Constant is included in the model.

b. The cut value is ,500

## Variables in the Equation

|                 | B      | S.E. | Wald     | df | Sig. | Exp(B) |
|-----------------|--------|------|----------|----|------|--------|
| Step 0 Constant | -2,618 | ,036 | 5417,889 | 1  | ,000 | ,073   |

## Variables not in the Equation

|                  | Score   | df | Sig. |
|------------------|---------|----|------|
| Step 0 Variables |         |    |      |
| bv1              | 26,218  | 2  | ,000 |
| bv1(1)           | 23,791  | 1  | ,000 |
| bv1(2)           | 11,302  | 1  | ,001 |
| VASTY2           | 299,491 | 35 | ,000 |
| VASTY2(1)        | ,007    | 1  | ,934 |
| VASTY2(2)        | 8,968   | 1  | ,003 |
| VASTY2(3)        | 15,764  | 1  | ,000 |
| VASTY2(4)        | ,453    | 1  | ,501 |
| VASTY2(5)        | ,965    | 1  | ,326 |
| VASTY2(6)        | 14,062  | 1  | ,000 |
| VASTY2(7)        | 12,067  | 1  | ,001 |
| VASTY2(8)        | 1,504   | 1  | ,220 |
| VASTY2(9)        | 1,612   | 1  | ,204 |
| VASTY2(10)       | 55,161  | 1  | ,000 |
| VASTY2(11)       | 11,675  | 1  | ,001 |
| VASTY2(12)       | ,213    | 1  | ,644 |
| VASTY2(13)       | 55,161  | 1  | ,000 |
| VASTY2(14)       | 1,504   | 1  | ,220 |
| VASTY2(15)       | 1,199   | 1  | ,273 |
| VASTY2(16)       | 3,222   | 1  | ,073 |
| VASTY2(17)       | 12,590  | 1  | ,000 |
| VASTY2(18)       | 7,137   | 1  | ,008 |
| VASTY2(19)       | 19,294  | 1  | ,000 |
| VASTY2(20)       | ,030    | 1  | ,863 |
| VASTY2(21)       | ,647    | 1  | ,421 |
| VASTY2(22)       | ,782    | 1  | ,377 |
| VASTY2(23)       | 1,199   | 1  | ,273 |
| VASTY2(24)       | 2,253   | 1  | ,133 |
| VASTY2(25)       | 1,513   | 1  | ,219 |
| VASTY2(26)       | 7,708   | 1  | ,005 |
| VASTY2(27)       | 15,836  | 1  | ,000 |
| VASTY2(28)       | 6,172   | 1  | ,013 |
| VASTY2(29)       | 11,203  | 1  | ,001 |
| VASTY2(30)       | 1,058   | 1  | ,304 |
| VASTY2(31)       | 6,527   | 1  | ,011 |
| VASTY2(32)       | ,544    | 1  | ,461 |
| VASTY2(33)       | ,126    | 1  | ,723 |
| VASTY2(34)       | 14,062  | 1  | ,000 |
| VASTY2(35)       | 15,901  | 1  | ,000 |

## Variables not in the Equation

|                    | Score   | df | Sig. |
|--------------------|---------|----|------|
| Overall Statistics | 311,739 | 37 | ,000 |

## Block 1: Method = Enter

## Omnibus Tests of Model Coefficients

|             | Chi-square | df | Sig. |
|-------------|------------|----|------|
| Step 1 Step | 320,286    | 37 | ,000 |
| Block       | 320,286    | 37 | ,000 |
| Model       | 320,286    | 37 | ,000 |

## Model Summary

| Step | -2 Log likelihood     | Cox & Snell R Square | Nagelkerke R Square |
|------|-----------------------|----------------------|---------------------|
| 1    | 5876,585 <sup>a</sup> | ,025                 | ,065                |

a. Estimation terminated at iteration number 7 because parameter estimates changed by less than ,001.

Classification Table<sup>a</sup>

| Observed           |                                                | Predicted                           |                       |
|--------------------|------------------------------------------------|-------------------------------------|-----------------------|
| Step 1             | luonnelt1 luonne highest = tapahtui potilaalle | 0 ingen händelse eller läheltä piti | 1 tapahtui potilaalle |
| Overall Percentage |                                                |                                     |                       |

Classification Table<sup>a</sup>

| Observed           |                                                | Predicted                           |                                     |
|--------------------|------------------------------------------------|-------------------------------------|-------------------------------------|
|                    |                                                | luonnelt1 luonne highest = ...      | 0 ingen händelse eller läheltä piti |
| Step 1             | luonnelt1 luonne highest = tapahtui potilaalle | 0 ingen händelse eller läheltä piti | 11627                               |
| Overall Percentage |                                                | 1 tapahtui potilaalle               | 848                                 |

1  
2  
3  
4  
5  
6  
7  
8  
9  
10  
11  
12  
13  
14  
15  
16  
17  
18  
19  
20  
21  
22  
23  
24  
25  
26  
27  
28  
29  
30  
31  
32  
33  
34  
35  
36  
37  
38  
39  
40  
41  
42  
43  
44  
45  
46  
47  
48  
49  
50  
51  
52  
53  
54  
55  
56  
57  
58  
59  
60

**Classification Table<sup>a</sup>**

|        |                                                | Observed                            |                       | Predicted                       |                          |
|--------|------------------------------------------------|-------------------------------------|-----------------------|---------------------------------|--------------------------|
|        |                                                |                                     |                       | luonnelt1<br>luonne highest ... | 1 tapahtui<br>potilaalle |
| Step 1 | luonnelt1 luonne highest = tapahtui potilaalle | 0 ingen händelse eller läheltä piti | 1 tapahtui potilaalle | 0                               | 0                        |
|        | Overall Percentage                             |                                     |                       |                                 | 0                        |

**Classification Table<sup>a</sup>**

|        |                                                | Observed                            |                       | Predicted             |    |
|--------|------------------------------------------------|-------------------------------------|-----------------------|-----------------------|----|
|        |                                                |                                     |                       | Percentage<br>Correct |    |
| Step 1 | luonnelt1 luonne highest = tapahtui potilaalle | 0 ingen händelse eller läheltä piti | 1 tapahtui potilaalle | 100,0                 | ,0 |
|        | Overall Percentage                             |                                     |                       | 93,2                  |    |

a. The cut value is ,500

Review only

## Variables in the Equation

|                         | B      | S.E. | Wald    | df | Sig. | Exp(B) |
|-------------------------|--------|------|---------|----|------|--------|
| Step 1 <sup>a</sup> bv1 |        |      | 12,580  | 2  | ,002 |        |
| bv1(1)                  | -,279  | ,102 | 7,512   | 1  | ,006 | ,757   |
| bv1(2)                  | ,105   | ,085 | 1,521   | 1  | ,217 | 1,111  |
| VASTY2                  |        |      | 236,395 | 35 | ,000 |        |
| VASTY2(1)               | ,094   | ,299 | ,099    | 1  | ,752 | 1,099  |
| VASTY2(2)               | ,538   | ,274 | 3,849   | 1  | ,050 | 1,713  |
| VASTY2(3)               | -1,507 | ,466 | 10,436  | 1  | ,001 | ,222   |
| VASTY2(4)               | ,124   | ,294 | ,178    | 1  | ,673 | 1,132  |
| VASTY2(5)               | -,192  | ,325 | ,350    | 1  | ,554 | ,825   |
| VASTY2(6)               | -1,298 | ,439 | 8,730   | 1  | ,003 | ,273   |
| VASTY2(7)               | ,529   | ,276 | 3,672   | 1  | ,055 | 1,698  |
| VASTY2(8)               | -,265  | ,320 | ,686    | 1  | ,407 | ,767   |
| VASTY2(9)               | ,262   | ,291 | ,810    | 1  | ,368 | 1,299  |
| VASTY2(10)              | 1,014  | ,258 | 15,416  | 1  | ,000 | 2,756  |
| VASTY2(11)              | ,615   | ,272 | 5,094   | 1  | ,024 | 1,849  |
| VASTY2(12)              | ,115   | ,295 | ,153    | 1  | ,695 | 1,122  |
| VASTY2(13)              | ,966   | ,260 | 13,812  | 1  | ,000 | 2,628  |
| VASTY2(14)              | -,257  | ,320 | ,646    | 1  | ,422 | ,773   |
| VASTY2(15)              | ,244   | ,288 | ,719    | 1  | ,396 | 1,277  |
| VASTY2(16)              | ,515   | ,330 | 2,437   | 1  | ,119 | 1,674  |
| VASTY2(17)              | -1,073 | ,418 | 6,592   | 1  | ,010 | ,342   |
| VASTY2(18)              | -,668  | ,365 | 3,357   | 1  | ,067 | ,513   |
| VASTY2(19)              | -1,610 | ,551 | 8,547   | 1  | ,003 | ,200   |
| VASTY2(20)              | ,066   | ,314 | ,045    | 1  | ,832 | 1,069  |
| VASTY2(21)              | -,127  | ,312 | ,167    | 1  | ,683 | ,880   |
| VASTY2(22)              | ,328   | ,291 | 1,275   | 1  | ,259 | 1,388  |
| VASTY2(23)              | ,308   | ,288 | 1,142   | 1  | ,285 | 1,360  |
| VASTY2(24)              | ,264   | ,286 | ,857    | 1  | ,355 | 1,303  |
| VASTY2(25)              | ,346   | ,300 | 1,323   | 1  | ,250 | 1,413  |
| VASTY2(26)              | -,909  | ,419 | 4,711   | 1  | ,030 | ,403   |
| VASTY2(27)              | -1,454 | ,466 | 9,752   | 1  | ,002 | ,234   |
| VASTY2(28)              | -,988  | ,467 | 4,473   | 1  | ,034 | ,372   |
| VASTY2(29)              | -1,026 | ,401 | 6,552   | 1  | ,010 | ,359   |
| VASTY2(30)              | -,190  | ,315 | ,364    | 1  | ,546 | ,827   |
| VASTY2(31)              | ,520   | ,278 | 3,496   | 1  | ,062 | 1,681  |
| VASTY2(32)              | -,035  | ,313 | ,012    | 1  | ,912 | ,966   |
| VASTY2(33)              | ,035   | ,305 | ,013    | 1  | ,909 | 1,035  |
| VASTY2(34)              | -1,255 | ,438 | 8,197   | 1  | ,004 | ,285   |
| VASTY2(35)              | ,668   | ,278 | 5,783   | 1  | ,016 | 1,951  |
| Constant                | -2,639 | ,218 | 146,911 | 1  | ,000 | ,071   |



## Variables in the Equation

|                     |            | 95% C.I. for EXP(B) |       |
|---------------------|------------|---------------------|-------|
|                     |            | Lower               | Upper |
| Step 1 <sup>a</sup> | bv1        |                     |       |
|                     | bv1(1)     | ,620                | ,924  |
|                     | bv1(2)     | ,940                | 1,312 |
|                     | VASTY2     |                     |       |
|                     | VASTY2(1)  | ,611                | 1,975 |
|                     | VASTY2(2)  | 1,000               | 2,934 |
|                     | VASTY2(3)  | ,089                | ,553  |
|                     | VASTY2(4)  | ,637                | 2,013 |
|                     | VASTY2(5)  | ,436                | 1,560 |
|                     | VASTY2(6)  | ,115                | ,646  |
|                     | VASTY2(7)  | ,988                | 2,917 |
|                     | VASTY2(8)  | ,410                | 1,436 |
|                     | VASTY2(9)  | ,735                | 2,299 |
|                     | VASTY2(10) | 1,662               | 4,572 |
|                     | VASTY2(11) | 1,084               | 3,153 |
|                     | VASTY2(12) | ,630                | 1,999 |
|                     | VASTY2(13) | 1,579               | 4,374 |
|                     | VASTY2(14) | ,413                | 1,448 |
|                     | VASTY2(15) | ,726                | 2,246 |
|                     | VASTY2(16) | ,877                | 3,196 |
|                     | VASTY2(17) | ,151                | ,776  |
|                     | VASTY2(18) | ,251                | 1,048 |
|                     | VASTY2(19) | ,068                | ,588  |
|                     | VASTY2(20) | ,578                | 1,977 |
|                     | VASTY2(21) | ,478                | 1,622 |
|                     | VASTY2(22) | ,786                | 2,454 |
|                     | VASTY2(23) | ,774                | 2,392 |
|                     | VASTY2(24) | ,744                | 2,281 |
|                     | VASTY2(25) | ,784                | 2,546 |
|                     | VASTY2(26) | ,177                | ,916  |
|                     | VASTY2(27) | ,094                | ,582  |
|                     | VASTY2(28) | ,149                | ,930  |
|                     | VASTY2(29) | ,163                | ,786  |
|                     | VASTY2(30) | ,445                | 1,534 |
|                     | VASTY2(31) | ,975                | 2,899 |
|                     | VASTY2(32) | ,523                | 1,783 |
|                     | VASTY2(33) | ,569                | 1,884 |
|                     | VASTY2(34) | ,121                | ,673  |
|                     | VASTY2(35) | 1,132               | 3,363 |
|                     | Constant   |                     |       |

a. Variable(s) entered on step 1: bv1, VASTY2.

```

1
2
3 LOGISTIC REGRESSION VARIABLES luonnelt1
4   /METHOD=ENTER bv2 VASTY2
5   /CONTRAST (bv2)=Indicator(1)
6   /CONTRAST (VASTY2)=Indicator(1)
7   /PRINT=CI(95)
8   /CRITERIA=PIN(0.05) POUT(0.10) ITERATE(20) CUT(0.5).
9
10
11

```

## Logistic Regression

[DataSet6] C:\cWordjan\Rafaela\_VCS\alla\_tillsammans\abo\_bjo\_vasa\_v1.sav

### Case Processing Summary

| Unweighted Cases <sup>a</sup> |                      | N     | Percent |
|-------------------------------|----------------------|-------|---------|
| Selected Cases                | Included in Analysis | 12475 | 100,0   |
|                               | Missing Cases        | 0     | ,0      |
|                               | Total                | 12475 | 100,0   |
| Unselected Cases              |                      | 0     | ,0      |
| Total                         |                      | 12475 | 100,0   |

a. If weight is in effect, see classification table for the total number of cases.

### Dependent Variable Encoding

| Original Value                      | Internal Value |
|-------------------------------------|----------------|
| 0 ingen händelse eller läheltä piti | 0              |
| 1 tapahtui potilaalle               | 1              |

## Categorical Variables Codings

|                                             |                   | Frequency | Parameter coding |       |
|---------------------------------------------|-------------------|-----------|------------------|-------|
|                                             |                   |           | (1)              | (2)   |
| VASTY2 (SAIR*10000)+VASTY                   | 403073101         | 365       | ,000             | ,000  |
|                                             | 403073102         | 362       | 1,000            | ,000  |
|                                             | 403073103         | 365       | ,000             | 1,000 |
|                                             | 403073202         | 365       | ,000             | ,000  |
|                                             | 403073203         | 365       | ,000             | ,000  |
|                                             | 403073204         | 330       | ,000             | ,000  |
|                                             | 403073303         | 364       | ,000             | ,000  |
|                                             | 403073651         | 362       | ,000             | ,000  |
|                                             | 403073771         | 365       | ,000             | ,000  |
|                                             | 403133102         | 341       | ,000             | ,000  |
|                                             | 403133106         | 365       | ,000             | ,000  |
|                                             | 403133107         | 365       | ,000             | ,000  |
|                                             | 403133109         | 365       | ,000             | ,000  |
|                                             | 403133202         | 365       | ,000             | ,000  |
|                                             | 403133203         | 365       | ,000             | ,000  |
|                                             | 403133204         | 365       | ,000             | ,000  |
|                                             | 403133315         | 177       | ,000             | ,000  |
|                                             | 403133322         | 365       | ,000             | ,000  |
|                                             | 403133401         | 362       | ,000             | ,000  |
|                                             | 403133402         | 365       | ,000             | ,000  |
|                                             | 403133550         | 298       | ,000             | ,000  |
|                                             | 403133772         | 365       | ,000             | ,000  |
|                                             | 403135803         | 365       | ,000             | ,000  |
|                                             | 404060001         | 365       | ,000             | ,000  |
|                                             | 404060002         | 366       | ,000             | ,000  |
|                                             | 404310003         | 291       | ,000             | ,000  |
|                                             | 404310004         | 291       | ,000             | ,000  |
|                                             | 502300005         | 366       | ,000             | ,000  |
|                                             | 502300006         | 225       | ,000             | ,000  |
|                                             | 502300007         | 366       | ,000             | ,000  |
|                                             | 502300214         | 366       | ,000             | ,000  |
|                                             | 502300411         | 366       | ,000             | ,000  |
|                                             | 502300415         | 360       | ,000             | ,000  |
|                                             | 502300416         | 363       | ,000             | ,000  |
|                                             | 502300811         | 364       | ,000             | ,000  |
|                                             | 502300913         | 315       | ,000             | ,000  |
| bv2 belastning vs paoncil halva intervallet | 1 medelbelastning | 2788      | ,000             | ,000  |
|                                             | 2 underbelastning | 4419      | 1,000            | ,000  |
|                                             | 3 överbelastning  | 5268      | ,000             | 1,000 |

## Categorical Variables Codings

|                                             |                   | Parameter coding |       |       |
|---------------------------------------------|-------------------|------------------|-------|-------|
|                                             |                   | (3)              | (4)   | (5)   |
| VASTY2 (SAIR*10000)+VASTY                   | 403073101         | ,000             | ,000  | ,000  |
|                                             | 403073102         | ,000             | ,000  | ,000  |
|                                             | 403073103         | ,000             | ,000  | ,000  |
|                                             | 403073202         | 1,000            | ,000  | ,000  |
|                                             | 403073203         | ,000             | 1,000 | ,000  |
|                                             | 403073204         | ,000             | ,000  | 1,000 |
|                                             | 403073303         | ,000             | ,000  | ,000  |
|                                             | 403073651         | ,000             | ,000  | ,000  |
|                                             | 403073771         | ,000             | ,000  | ,000  |
|                                             | 403133102         | ,000             | ,000  | ,000  |
|                                             | 403133106         | ,000             | ,000  | ,000  |
|                                             | 403133107         | ,000             | ,000  | ,000  |
|                                             | 403133109         | ,000             | ,000  | ,000  |
|                                             | 403133202         | ,000             | ,000  | ,000  |
|                                             | 403133203         | ,000             | ,000  | ,000  |
|                                             | 403133204         | ,000             | ,000  | ,000  |
|                                             | 403133315         | ,000             | ,000  | ,000  |
|                                             | 403133322         | ,000             | ,000  | ,000  |
|                                             | 403133401         | ,000             | ,000  | ,000  |
|                                             | 403133402         | ,000             | ,000  | ,000  |
|                                             | 403133550         | ,000             | ,000  | ,000  |
|                                             | 403133772         | ,000             | ,000  | ,000  |
|                                             | 403135803         | ,000             | ,000  | ,000  |
|                                             | 404060001         | ,000             | ,000  | ,000  |
|                                             | 404060002         | ,000             | ,000  | ,000  |
|                                             | 404310003         | ,000             | ,000  | ,000  |
|                                             | 404310004         | ,000             | ,000  | ,000  |
|                                             | 502300005         | ,000             | ,000  | ,000  |
|                                             | 502300006         | ,000             | ,000  | ,000  |
|                                             | 502300007         | ,000             | ,000  | ,000  |
|                                             | 502300214         | ,000             | ,000  | ,000  |
|                                             | 502300411         | ,000             | ,000  | ,000  |
|                                             | 502300415         | ,000             | ,000  | ,000  |
|                                             | 502300416         | ,000             | ,000  | ,000  |
|                                             | 502300811         | ,000             | ,000  | ,000  |
|                                             | 502300913         | ,000             | ,000  | ,000  |
| bv2 belastning vs paoncil halva intervallet | 1 medelbelastning |                  |       |       |
|                                             | 2 underbelastning |                  |       |       |
|                                             | 3 överbelastning  |                  |       |       |

## Categorical Variables Codings

|                                             |                   | Parameter coding |       |       |
|---------------------------------------------|-------------------|------------------|-------|-------|
|                                             |                   | (6)              | (7)   | (8)   |
| VASTY2 (SAIR*10000)+VASTY                   | 403073101         | ,000             | ,000  | ,000  |
|                                             | 403073102         | ,000             | ,000  | ,000  |
|                                             | 403073103         | ,000             | ,000  | ,000  |
|                                             | 403073202         | ,000             | ,000  | ,000  |
|                                             | 403073203         | ,000             | ,000  | ,000  |
|                                             | 403073204         | ,000             | ,000  | ,000  |
|                                             | 403073303         | 1,000            | ,000  | ,000  |
|                                             | 403073651         | ,000             | 1,000 | ,000  |
|                                             | 403073771         | ,000             | ,000  | 1,000 |
|                                             | 403133102         | ,000             | ,000  | ,000  |
|                                             | 403133106         | ,000             | ,000  | ,000  |
|                                             | 403133107         | ,000             | ,000  | ,000  |
|                                             | 403133109         | ,000             | ,000  | ,000  |
|                                             | 403133202         | ,000             | ,000  | ,000  |
|                                             | 403133203         | ,000             | ,000  | ,000  |
|                                             | 403133204         | ,000             | ,000  | ,000  |
|                                             | 403133315         | ,000             | ,000  | ,000  |
|                                             | 403133322         | ,000             | ,000  | ,000  |
|                                             | 403133401         | ,000             | ,000  | ,000  |
|                                             | 403133402         | ,000             | ,000  | ,000  |
|                                             | 403133550         | ,000             | ,000  | ,000  |
|                                             | 403133772         | ,000             | ,000  | ,000  |
|                                             | 403135803         | ,000             | ,000  | ,000  |
|                                             | 404060001         | ,000             | ,000  | ,000  |
|                                             | 404060002         | ,000             | ,000  | ,000  |
|                                             | 404310003         | ,000             | ,000  | ,000  |
|                                             | 404310004         | ,000             | ,000  | ,000  |
|                                             | 502300005         | ,000             | ,000  | ,000  |
|                                             | 502300006         | ,000             | ,000  | ,000  |
|                                             | 502300007         | ,000             | ,000  | ,000  |
|                                             | 502300214         | ,000             | ,000  | ,000  |
|                                             | 502300411         | ,000             | ,000  | ,000  |
|                                             | 502300415         | ,000             | ,000  | ,000  |
|                                             | 502300416         | ,000             | ,000  | ,000  |
|                                             | 502300811         | ,000             | ,000  | ,000  |
|                                             | 502300913         | ,000             | ,000  | ,000  |
| bv2 belastning vs paoncil halva intervallet | 1 medelbelastning |                  |       |       |
|                                             | 2 underbelastning |                  |       |       |
|                                             | 3 överbelastning  |                  |       |       |

## Categorical Variables Codings

|                                             |                   | Parameter coding |       |       |
|---------------------------------------------|-------------------|------------------|-------|-------|
|                                             |                   | (9)              | (10)  | (11)  |
| VASTY2 (SAIR*10000)+VASTY                   | 403073101         | ,000             | ,000  | ,000  |
|                                             | 403073102         | ,000             | ,000  | ,000  |
|                                             | 403073103         | ,000             | ,000  | ,000  |
|                                             | 403073202         | ,000             | ,000  | ,000  |
|                                             | 403073203         | ,000             | ,000  | ,000  |
|                                             | 403073204         | ,000             | ,000  | ,000  |
|                                             | 403073303         | ,000             | ,000  | ,000  |
|                                             | 403073651         | ,000             | ,000  | ,000  |
|                                             | 403073771         | ,000             | ,000  | ,000  |
|                                             | 403133102         | 1,000            | ,000  | ,000  |
|                                             | 403133106         | ,000             | 1,000 | ,000  |
|                                             | 403133107         | ,000             | ,000  | 1,000 |
|                                             | 403133109         | ,000             | ,000  | ,000  |
|                                             | 403133202         | ,000             | ,000  | ,000  |
|                                             | 403133203         | ,000             | ,000  | ,000  |
|                                             | 403133204         | ,000             | ,000  | ,000  |
|                                             | 403133315         | ,000             | ,000  | ,000  |
|                                             | 403133322         | ,000             | ,000  | ,000  |
|                                             | 403133401         | ,000             | ,000  | ,000  |
|                                             | 403133402         | ,000             | ,000  | ,000  |
|                                             | 403133550         | ,000             | ,000  | ,000  |
|                                             | 403133772         | ,000             | ,000  | ,000  |
|                                             | 403135803         | ,000             | ,000  | ,000  |
|                                             | 404060001         | ,000             | ,000  | ,000  |
|                                             | 404060002         | ,000             | ,000  | ,000  |
|                                             | 404310003         | ,000             | ,000  | ,000  |
|                                             | 404310004         | ,000             | ,000  | ,000  |
|                                             | 502300005         | ,000             | ,000  | ,000  |
|                                             | 502300006         | ,000             | ,000  | ,000  |
|                                             | 502300007         | ,000             | ,000  | ,000  |
|                                             | 502300214         | ,000             | ,000  | ,000  |
|                                             | 502300411         | ,000             | ,000  | ,000  |
|                                             | 502300415         | ,000             | ,000  | ,000  |
|                                             | 502300416         | ,000             | ,000  | ,000  |
|                                             | 502300811         | ,000             | ,000  | ,000  |
|                                             | 502300913         | ,000             | ,000  | ,000  |
| bv2 belastning vs paoncil halva intervallet | 1 medelbelastning |                  |       |       |
|                                             | 2 underbelastning |                  |       |       |
|                                             | 3 överbelastning  |                  |       |       |

## Categorical Variables Codings

|                                             |                   | Parameter coding |       |       |
|---------------------------------------------|-------------------|------------------|-------|-------|
|                                             |                   | (12)             | (13)  | (14)  |
| VASTY2 (SAIR*10000)+VASTY                   | 403073101         | ,000             | ,000  | ,000  |
|                                             | 403073102         | ,000             | ,000  | ,000  |
|                                             | 403073103         | ,000             | ,000  | ,000  |
|                                             | 403073202         | ,000             | ,000  | ,000  |
|                                             | 403073203         | ,000             | ,000  | ,000  |
|                                             | 403073204         | ,000             | ,000  | ,000  |
|                                             | 403073303         | ,000             | ,000  | ,000  |
|                                             | 403073651         | ,000             | ,000  | ,000  |
|                                             | 403073771         | ,000             | ,000  | ,000  |
|                                             | 403133102         | ,000             | ,000  | ,000  |
|                                             | 403133106         | ,000             | ,000  | ,000  |
|                                             | 403133107         | ,000             | ,000  | ,000  |
|                                             | 403133109         | 1,000            | ,000  | ,000  |
|                                             | 403133202         | ,000             | 1,000 | ,000  |
|                                             | 403133203         | ,000             | ,000  | 1,000 |
|                                             | 403133204         | ,000             | ,000  | ,000  |
|                                             | 403133315         | ,000             | ,000  | ,000  |
|                                             | 403133322         | ,000             | ,000  | ,000  |
|                                             | 403133401         | ,000             | ,000  | ,000  |
|                                             | 403133402         | ,000             | ,000  | ,000  |
|                                             | 403133550         | ,000             | ,000  | ,000  |
|                                             | 403133772         | ,000             | ,000  | ,000  |
|                                             | 403135803         | ,000             | ,000  | ,000  |
|                                             | 404060001         | ,000             | ,000  | ,000  |
|                                             | 404060002         | ,000             | ,000  | ,000  |
|                                             | 404310003         | ,000             | ,000  | ,000  |
|                                             | 404310004         | ,000             | ,000  | ,000  |
|                                             | 502300005         | ,000             | ,000  | ,000  |
|                                             | 502300006         | ,000             | ,000  | ,000  |
|                                             | 502300007         | ,000             | ,000  | ,000  |
|                                             | 502300214         | ,000             | ,000  | ,000  |
|                                             | 502300411         | ,000             | ,000  | ,000  |
|                                             | 502300415         | ,000             | ,000  | ,000  |
|                                             | 502300416         | ,000             | ,000  | ,000  |
|                                             | 502300811         | ,000             | ,000  | ,000  |
|                                             | 502300913         | ,000             | ,000  | ,000  |
| bv2 belastning vs paoncil halva intervallet | 1 medelbelastning |                  |       |       |
|                                             | 2 underbelastning |                  |       |       |
|                                             | 3 överbelastning  |                  |       |       |

## Categorical Variables Codings

|                                             |                   | Parameter coding |       |       |
|---------------------------------------------|-------------------|------------------|-------|-------|
|                                             |                   | (15)             | (16)  | (17)  |
| VASTY2 (SAIR*10000)+VASTY                   | 403073101         | ,000             | ,000  | ,000  |
|                                             | 403073102         | ,000             | ,000  | ,000  |
|                                             | 403073103         | ,000             | ,000  | ,000  |
|                                             | 403073202         | ,000             | ,000  | ,000  |
|                                             | 403073203         | ,000             | ,000  | ,000  |
|                                             | 403073204         | ,000             | ,000  | ,000  |
|                                             | 403073303         | ,000             | ,000  | ,000  |
|                                             | 403073651         | ,000             | ,000  | ,000  |
|                                             | 403073771         | ,000             | ,000  | ,000  |
|                                             | 403133102         | ,000             | ,000  | ,000  |
|                                             | 403133106         | ,000             | ,000  | ,000  |
|                                             | 403133107         | ,000             | ,000  | ,000  |
|                                             | 403133109         | ,000             | ,000  | ,000  |
|                                             | 403133202         | ,000             | ,000  | ,000  |
|                                             | 403133203         | ,000             | ,000  | ,000  |
|                                             | 403133204         | 1,000            | ,000  | ,000  |
|                                             | 403133315         | ,000             | 1,000 | ,000  |
|                                             | 403133322         | ,000             | ,000  | 1,000 |
|                                             | 403133401         | ,000             | ,000  | ,000  |
|                                             | 403133402         | ,000             | ,000  | ,000  |
|                                             | 403133550         | ,000             | ,000  | ,000  |
|                                             | 403133772         | ,000             | ,000  | ,000  |
|                                             | 403135803         | ,000             | ,000  | ,000  |
|                                             | 404060001         | ,000             | ,000  | ,000  |
|                                             | 404060002         | ,000             | ,000  | ,000  |
|                                             | 404310003         | ,000             | ,000  | ,000  |
|                                             | 404310004         | ,000             | ,000  | ,000  |
|                                             | 502300005         | ,000             | ,000  | ,000  |
|                                             | 502300006         | ,000             | ,000  | ,000  |
|                                             | 502300007         | ,000             | ,000  | ,000  |
|                                             | 502300214         | ,000             | ,000  | ,000  |
|                                             | 502300411         | ,000             | ,000  | ,000  |
|                                             | 502300415         | ,000             | ,000  | ,000  |
|                                             | 502300416         | ,000             | ,000  | ,000  |
|                                             | 502300811         | ,000             | ,000  | ,000  |
|                                             | 502300913         | ,000             | ,000  | ,000  |
| bv2 belastning vs paoncil halva intervallet | 1 medelbelastning |                  |       |       |
|                                             | 2 underbelastning |                  |       |       |
|                                             | 3 överbelastning  |                  |       |       |



## Categorical Variables Codings

|                                             |                   | Parameter coding |       |       |
|---------------------------------------------|-------------------|------------------|-------|-------|
|                                             |                   | (18)             | (19)  | (20)  |
| VASTY2 (SAIR*10000)+VASTY                   | 403073101         | ,000             | ,000  | ,000  |
|                                             | 403073102         | ,000             | ,000  | ,000  |
|                                             | 403073103         | ,000             | ,000  | ,000  |
|                                             | 403073202         | ,000             | ,000  | ,000  |
|                                             | 403073203         | ,000             | ,000  | ,000  |
|                                             | 403073204         | ,000             | ,000  | ,000  |
|                                             | 403073303         | ,000             | ,000  | ,000  |
|                                             | 403073651         | ,000             | ,000  | ,000  |
|                                             | 403073771         | ,000             | ,000  | ,000  |
|                                             | 403133102         | ,000             | ,000  | ,000  |
|                                             | 403133106         | ,000             | ,000  | ,000  |
|                                             | 403133107         | ,000             | ,000  | ,000  |
|                                             | 403133109         | ,000             | ,000  | ,000  |
|                                             | 403133202         | ,000             | ,000  | ,000  |
|                                             | 403133203         | ,000             | ,000  | ,000  |
|                                             | 403133204         | ,000             | ,000  | ,000  |
|                                             | 403133315         | ,000             | ,000  | ,000  |
|                                             | 403133322         | ,000             | ,000  | ,000  |
|                                             | 403133401         | 1,000            | ,000  | ,000  |
|                                             | 403133402         | ,000             | 1,000 | ,000  |
|                                             | 403133550         | ,000             | ,000  | 1,000 |
|                                             | 403133772         | ,000             | ,000  | ,000  |
|                                             | 403135803         | ,000             | ,000  | ,000  |
|                                             | 404060001         | ,000             | ,000  | ,000  |
|                                             | 404060002         | ,000             | ,000  | ,000  |
|                                             | 404310003         | ,000             | ,000  | ,000  |
|                                             | 404310004         | ,000             | ,000  | ,000  |
|                                             | 502300005         | ,000             | ,000  | ,000  |
|                                             | 502300006         | ,000             | ,000  | ,000  |
|                                             | 502300007         | ,000             | ,000  | ,000  |
|                                             | 502300214         | ,000             | ,000  | ,000  |
|                                             | 502300411         | ,000             | ,000  | ,000  |
|                                             | 502300415         | ,000             | ,000  | ,000  |
|                                             | 502300416         | ,000             | ,000  | ,000  |
|                                             | 502300811         | ,000             | ,000  | ,000  |
|                                             | 502300913         | ,000             | ,000  | ,000  |
| bv2 belastning vs paoncil halva intervallet | 1 medelbelastning |                  |       |       |
|                                             | 2 underbelastning |                  |       |       |
|                                             | 3 överbelastning  |                  |       |       |

## Categorical Variables Codings

|                                             |                   | Parameter coding |       |       |
|---------------------------------------------|-------------------|------------------|-------|-------|
|                                             |                   | (21)             | (22)  | (23)  |
| VASTY2 (SAIR*10000)+VASTY                   | 403073101         | ,000             | ,000  | ,000  |
|                                             | 403073102         | ,000             | ,000  | ,000  |
|                                             | 403073103         | ,000             | ,000  | ,000  |
|                                             | 403073202         | ,000             | ,000  | ,000  |
|                                             | 403073203         | ,000             | ,000  | ,000  |
|                                             | 403073204         | ,000             | ,000  | ,000  |
|                                             | 403073303         | ,000             | ,000  | ,000  |
|                                             | 403073651         | ,000             | ,000  | ,000  |
|                                             | 403073771         | ,000             | ,000  | ,000  |
|                                             | 403133102         | ,000             | ,000  | ,000  |
|                                             | 403133106         | ,000             | ,000  | ,000  |
|                                             | 403133107         | ,000             | ,000  | ,000  |
|                                             | 403133109         | ,000             | ,000  | ,000  |
|                                             | 403133202         | ,000             | ,000  | ,000  |
|                                             | 403133203         | ,000             | ,000  | ,000  |
|                                             | 403133204         | ,000             | ,000  | ,000  |
|                                             | 403133315         | ,000             | ,000  | ,000  |
|                                             | 403133322         | ,000             | ,000  | ,000  |
|                                             | 403133401         | ,000             | ,000  | ,000  |
|                                             | 403133402         | ,000             | ,000  | ,000  |
|                                             | 403133550         | ,000             | ,000  | ,000  |
|                                             | 403133772         | 1,000            | ,000  | ,000  |
|                                             | 403135803         | ,000             | 1,000 | ,000  |
|                                             | 404060001         | ,000             | ,000  | 1,000 |
|                                             | 404060002         | ,000             | ,000  | ,000  |
|                                             | 404310003         | ,000             | ,000  | ,000  |
|                                             | 404310004         | ,000             | ,000  | ,000  |
|                                             | 502300005         | ,000             | ,000  | ,000  |
|                                             | 502300006         | ,000             | ,000  | ,000  |
|                                             | 502300007         | ,000             | ,000  | ,000  |
|                                             | 502300214         | ,000             | ,000  | ,000  |
|                                             | 502300411         | ,000             | ,000  | ,000  |
|                                             | 502300415         | ,000             | ,000  | ,000  |
|                                             | 502300416         | ,000             | ,000  | ,000  |
|                                             | 502300811         | ,000             | ,000  | ,000  |
|                                             | 502300913         | ,000             | ,000  | ,000  |
| bv2 belastning vs paoncil halva intervallet | 1 medelbelastning |                  |       |       |
|                                             | 2 underbelastning |                  |       |       |
|                                             | 3 överbelastning  |                  |       |       |

## Categorical Variables Codings

|                                             |                   | Parameter coding |       |       |
|---------------------------------------------|-------------------|------------------|-------|-------|
|                                             |                   | (24)             | (25)  | (26)  |
| VASTY2 (SAIR*10000)+VASTY                   | 403073101         | ,000             | ,000  | ,000  |
|                                             | 403073102         | ,000             | ,000  | ,000  |
|                                             | 403073103         | ,000             | ,000  | ,000  |
|                                             | 403073202         | ,000             | ,000  | ,000  |
|                                             | 403073203         | ,000             | ,000  | ,000  |
|                                             | 403073204         | ,000             | ,000  | ,000  |
|                                             | 403073303         | ,000             | ,000  | ,000  |
|                                             | 403073651         | ,000             | ,000  | ,000  |
|                                             | 403073771         | ,000             | ,000  | ,000  |
|                                             | 403133102         | ,000             | ,000  | ,000  |
|                                             | 403133106         | ,000             | ,000  | ,000  |
|                                             | 403133107         | ,000             | ,000  | ,000  |
|                                             | 403133109         | ,000             | ,000  | ,000  |
|                                             | 403133202         | ,000             | ,000  | ,000  |
|                                             | 403133203         | ,000             | ,000  | ,000  |
|                                             | 403133204         | ,000             | ,000  | ,000  |
|                                             | 403133315         | ,000             | ,000  | ,000  |
|                                             | 403133322         | ,000             | ,000  | ,000  |
|                                             | 403133401         | ,000             | ,000  | ,000  |
|                                             | 403133402         | ,000             | ,000  | ,000  |
|                                             | 403133550         | ,000             | ,000  | ,000  |
|                                             | 403133772         | ,000             | ,000  | ,000  |
|                                             | 403135803         | ,000             | ,000  | ,000  |
|                                             | 404060001         | ,000             | ,000  | ,000  |
|                                             | 404060002         | 1,000            | ,000  | ,000  |
|                                             | 404310003         | ,000             | 1,000 | ,000  |
|                                             | 404310004         | ,000             | ,000  | 1,000 |
|                                             | 502300005         | ,000             | ,000  | ,000  |
|                                             | 502300006         | ,000             | ,000  | ,000  |
|                                             | 502300007         | ,000             | ,000  | ,000  |
|                                             | 502300214         | ,000             | ,000  | ,000  |
|                                             | 502300411         | ,000             | ,000  | ,000  |
|                                             | 502300415         | ,000             | ,000  | ,000  |
|                                             | 502300416         | ,000             | ,000  | ,000  |
|                                             | 502300811         | ,000             | ,000  | ,000  |
|                                             | 502300913         | ,000             | ,000  | ,000  |
| bv2 belastning vs paencil halva intervallet | 1 medelbelastning |                  |       |       |
|                                             | 2 underbelastning |                  |       |       |
|                                             | 3 överbelastning  |                  |       |       |

## Categorical Variables Codings

|                                             |                   | Parameter coding |       |       |
|---------------------------------------------|-------------------|------------------|-------|-------|
|                                             |                   | (27)             | (28)  | (29)  |
| VASTY2 (SAIR*10000)+VASTY                   | 403073101         | ,000             | ,000  | ,000  |
|                                             | 403073102         | ,000             | ,000  | ,000  |
|                                             | 403073103         | ,000             | ,000  | ,000  |
|                                             | 403073202         | ,000             | ,000  | ,000  |
|                                             | 403073203         | ,000             | ,000  | ,000  |
|                                             | 403073204         | ,000             | ,000  | ,000  |
|                                             | 403073303         | ,000             | ,000  | ,000  |
|                                             | 403073651         | ,000             | ,000  | ,000  |
|                                             | 403073771         | ,000             | ,000  | ,000  |
|                                             | 403133102         | ,000             | ,000  | ,000  |
|                                             | 403133106         | ,000             | ,000  | ,000  |
|                                             | 403133107         | ,000             | ,000  | ,000  |
|                                             | 403133109         | ,000             | ,000  | ,000  |
|                                             | 403133202         | ,000             | ,000  | ,000  |
|                                             | 403133203         | ,000             | ,000  | ,000  |
|                                             | 403133204         | ,000             | ,000  | ,000  |
|                                             | 403133315         | ,000             | ,000  | ,000  |
|                                             | 403133322         | ,000             | ,000  | ,000  |
|                                             | 403133401         | ,000             | ,000  | ,000  |
|                                             | 403133402         | ,000             | ,000  | ,000  |
|                                             | 403133550         | ,000             | ,000  | ,000  |
|                                             | 403133772         | ,000             | ,000  | ,000  |
|                                             | 403135803         | ,000             | ,000  | ,000  |
|                                             | 404060001         | ,000             | ,000  | ,000  |
|                                             | 404060002         | ,000             | ,000  | ,000  |
|                                             | 404310003         | ,000             | ,000  | ,000  |
|                                             | 404310004         | ,000             | ,000  | ,000  |
|                                             | 502300005         | 1,000            | ,000  | ,000  |
|                                             | 502300006         | ,000             | 1,000 | ,000  |
|                                             | 502300007         | ,000             | ,000  | 1,000 |
|                                             | 502300214         | ,000             | ,000  | ,000  |
|                                             | 502300411         | ,000             | ,000  | ,000  |
|                                             | 502300415         | ,000             | ,000  | ,000  |
|                                             | 502300416         | ,000             | ,000  | ,000  |
|                                             | 502300811         | ,000             | ,000  | ,000  |
|                                             | 502300913         | ,000             | ,000  | ,000  |
| bv2 belastning vs paoncil halva intervallet | 1 medelbelastning |                  |       |       |
|                                             | 2 underbelastning |                  |       |       |
|                                             | 3 överbelastning  |                  |       |       |

## Categorical Variables Codings

|                                             |                   | Parameter coding |       |       |
|---------------------------------------------|-------------------|------------------|-------|-------|
|                                             |                   | (30)             | (31)  | (32)  |
| VASTY2 (SAIR*10000)+VASTY                   | 403073101         | ,000             | ,000  | ,000  |
|                                             | 403073102         | ,000             | ,000  | ,000  |
|                                             | 403073103         | ,000             | ,000  | ,000  |
|                                             | 403073202         | ,000             | ,000  | ,000  |
|                                             | 403073203         | ,000             | ,000  | ,000  |
|                                             | 403073204         | ,000             | ,000  | ,000  |
|                                             | 403073303         | ,000             | ,000  | ,000  |
|                                             | 403073651         | ,000             | ,000  | ,000  |
|                                             | 403073771         | ,000             | ,000  | ,000  |
|                                             | 403133102         | ,000             | ,000  | ,000  |
|                                             | 403133106         | ,000             | ,000  | ,000  |
|                                             | 403133107         | ,000             | ,000  | ,000  |
|                                             | 403133109         | ,000             | ,000  | ,000  |
|                                             | 403133202         | ,000             | ,000  | ,000  |
|                                             | 403133203         | ,000             | ,000  | ,000  |
|                                             | 403133204         | ,000             | ,000  | ,000  |
|                                             | 403133315         | ,000             | ,000  | ,000  |
|                                             | 403133322         | ,000             | ,000  | ,000  |
|                                             | 403133401         | ,000             | ,000  | ,000  |
|                                             | 403133402         | ,000             | ,000  | ,000  |
|                                             | 403133550         | ,000             | ,000  | ,000  |
|                                             | 403133772         | ,000             | ,000  | ,000  |
|                                             | 403135803         | ,000             | ,000  | ,000  |
|                                             | 404060001         | ,000             | ,000  | ,000  |
|                                             | 404060002         | ,000             | ,000  | ,000  |
|                                             | 404310003         | ,000             | ,000  | ,000  |
|                                             | 404310004         | ,000             | ,000  | ,000  |
|                                             | 502300005         | ,000             | ,000  | ,000  |
|                                             | 502300006         | ,000             | ,000  | ,000  |
|                                             | 502300007         | ,000             | ,000  | ,000  |
|                                             | 502300214         | 1,000            | ,000  | ,000  |
|                                             | 502300411         | ,000             | 1,000 | ,000  |
|                                             | 502300415         | ,000             | ,000  | 1,000 |
|                                             | 502300416         | ,000             | ,000  | ,000  |
|                                             | 502300811         | ,000             | ,000  | ,000  |
|                                             | 502300913         | ,000             | ,000  | ,000  |
| bv2 belastning vs paoncil halva intervallet | 1 medelbelastning |                  |       |       |
|                                             | 2 underbelastning |                  |       |       |
|                                             | 3 överbelastning  |                  |       |       |

## Categorical Variables Codings

|                                             |                   | Parameter coding |       |       |
|---------------------------------------------|-------------------|------------------|-------|-------|
|                                             |                   | (33)             | (34)  | (35)  |
| VASTY2 (SAIR*10000)+VASTY                   | 403073101         | ,000             | ,000  | ,000  |
|                                             | 403073102         | ,000             | ,000  | ,000  |
|                                             | 403073103         | ,000             | ,000  | ,000  |
|                                             | 403073202         | ,000             | ,000  | ,000  |
|                                             | 403073203         | ,000             | ,000  | ,000  |
|                                             | 403073204         | ,000             | ,000  | ,000  |
|                                             | 403073303         | ,000             | ,000  | ,000  |
|                                             | 403073651         | ,000             | ,000  | ,000  |
|                                             | 403073771         | ,000             | ,000  | ,000  |
|                                             | 403133102         | ,000             | ,000  | ,000  |
|                                             | 403133106         | ,000             | ,000  | ,000  |
|                                             | 403133107         | ,000             | ,000  | ,000  |
|                                             | 403133109         | ,000             | ,000  | ,000  |
|                                             | 403133202         | ,000             | ,000  | ,000  |
|                                             | 403133203         | ,000             | ,000  | ,000  |
|                                             | 403133204         | ,000             | ,000  | ,000  |
|                                             | 403133315         | ,000             | ,000  | ,000  |
|                                             | 403133322         | ,000             | ,000  | ,000  |
|                                             | 403133401         | ,000             | ,000  | ,000  |
|                                             | 403133402         | ,000             | ,000  | ,000  |
|                                             | 403133550         | ,000             | ,000  | ,000  |
|                                             | 403133772         | ,000             | ,000  | ,000  |
|                                             | 403135803         | ,000             | ,000  | ,000  |
|                                             | 404060001         | ,000             | ,000  | ,000  |
|                                             | 404060002         | ,000             | ,000  | ,000  |
|                                             | 404310003         | ,000             | ,000  | ,000  |
|                                             | 404310004         | ,000             | ,000  | ,000  |
|                                             | 502300005         | ,000             | ,000  | ,000  |
|                                             | 502300006         | ,000             | ,000  | ,000  |
|                                             | 502300007         | ,000             | ,000  | ,000  |
|                                             | 502300214         | ,000             | ,000  | ,000  |
|                                             | 502300411         | ,000             | ,000  | ,000  |
|                                             | 502300415         | ,000             | ,000  | ,000  |
|                                             | 502300416         | 1,000            | ,000  | ,000  |
|                                             | 502300811         | ,000             | 1,000 | ,000  |
|                                             | 502300913         | ,000             | ,000  | 1,000 |
| bv2 belastning vs paoncil halva intervallet | 1 medelbelastning |                  |       |       |
|                                             | 2 underbelastning |                  |       |       |
|                                             | 3 överbelastning  |                  |       |       |

**Block 0: Beginning Block**

Classification Table<sup>a,b</sup>

|                    |                                                |                                                              |
|--------------------|------------------------------------------------|--------------------------------------------------------------|
| Observed           |                                                |                                                              |
| Step 0             | luonnelt1 luonne highest = tapahtui potilaalle | 0 ingen händelse eller läheltä piti<br>1 tapahtui potilaalle |
| Overall Percentage |                                                |                                                              |

Classification Table<sup>a,b</sup>

|                    |                                                |                                                              |                                     |
|--------------------|------------------------------------------------|--------------------------------------------------------------|-------------------------------------|
| Observed           |                                                |                                                              | Predicted                           |
|                    |                                                |                                                              | luonnelt1 luonne highest = ...      |
|                    |                                                |                                                              | 0 ingen händelse eller läheltä piti |
| Step 0             | luonnelt1 luonne highest = tapahtui potilaalle | 0 ingen händelse eller läheltä piti<br>1 tapahtui potilaalle | 11627<br>848                        |
| Overall Percentage |                                                |                                                              |                                     |

Classification Table<sup>a,b</sup>

|                    |                                                |                                                              |                              |
|--------------------|------------------------------------------------|--------------------------------------------------------------|------------------------------|
| Observed           |                                                |                                                              | Predicted                    |
|                    |                                                |                                                              | luonnelt1 luonne highest ... |
|                    |                                                |                                                              | 1 tapahtui potilaalle        |
| Step 0             | luonnelt1 luonne highest = tapahtui potilaalle | 0 ingen händelse eller läheltä piti<br>1 tapahtui potilaalle | 0<br>0                       |
| Overall Percentage |                                                |                                                              |                              |

Classification Table<sup>a,b</sup>

|                    |                                                |                                                              |                    |
|--------------------|------------------------------------------------|--------------------------------------------------------------|--------------------|
| Observed           |                                                |                                                              | Predicted          |
|                    |                                                |                                                              | Percentage Correct |
| Step 0             | luonnelt1 luonne highest = tapahtui potilaalle | 0 ingen händelse eller läheltä piti<br>1 tapahtui potilaalle | 100,0<br>,0        |
| Overall Percentage |                                                |                                                              | 93,2               |

a. Constant is included in the model.

b. The cut value is ,500

## Variables in the Equation

|                 | B      | S.E. | Wald     | df | Sig. | Exp(B) |
|-----------------|--------|------|----------|----|------|--------|
| Step 0 Constant | -2,618 | ,036 | 5417,889 | 1  | ,000 | ,073   |

## Variables not in the Equation

|                  | Score   | df | Sig. |
|------------------|---------|----|------|
| Step 0 Variables |         |    |      |
| bv2              | 20,768  | 2  | ,000 |
| bv2(1)           | 19,506  | 1  | ,000 |
| bv2(2)           | 13,438  | 1  | ,000 |
| VASTY2           | 299,491 | 35 | ,000 |
| VASTY2(1)        | ,007    | 1  | ,934 |
| VASTY2(2)        | 8,968   | 1  | ,003 |
| VASTY2(3)        | 15,764  | 1  | ,000 |
| VASTY2(4)        | ,453    | 1  | ,501 |
| VASTY2(5)        | ,965    | 1  | ,326 |
| VASTY2(6)        | 14,062  | 1  | ,000 |
| VASTY2(7)        | 12,067  | 1  | ,001 |
| VASTY2(8)        | 1,504   | 1  | ,220 |
| VASTY2(9)        | 1,612   | 1  | ,204 |
| VASTY2(10)       | 55,161  | 1  | ,000 |
| VASTY2(11)       | 11,675  | 1  | ,001 |
| VASTY2(12)       | ,213    | 1  | ,644 |
| VASTY2(13)       | 55,161  | 1  | ,000 |
| VASTY2(14)       | 1,504   | 1  | ,220 |
| VASTY2(15)       | 1,199   | 1  | ,273 |
| VASTY2(16)       | 3,222   | 1  | ,073 |
| VASTY2(17)       | 12,590  | 1  | ,000 |
| VASTY2(18)       | 7,137   | 1  | ,008 |
| VASTY2(19)       | 19,294  | 1  | ,000 |
| VASTY2(20)       | ,030    | 1  | ,863 |
| VASTY2(21)       | ,647    | 1  | ,421 |
| VASTY2(22)       | ,782    | 1  | ,377 |
| VASTY2(23)       | 1,199   | 1  | ,273 |
| VASTY2(24)       | 2,253   | 1  | ,133 |
| VASTY2(25)       | 1,513   | 1  | ,219 |
| VASTY2(26)       | 7,708   | 1  | ,005 |
| VASTY2(27)       | 15,836  | 1  | ,000 |
| VASTY2(28)       | 6,172   | 1  | ,013 |
| VASTY2(29)       | 11,203  | 1  | ,001 |
| VASTY2(30)       | 1,058   | 1  | ,304 |
| VASTY2(31)       | 6,527   | 1  | ,011 |
| VASTY2(32)       | ,544    | 1  | ,461 |
| VASTY2(33)       | ,126    | 1  | ,723 |
| VASTY2(34)       | 14,062  | 1  | ,000 |
| VASTY2(35)       | 15,901  | 1  | ,000 |



## Variables not in the Equation

|                    | Score   | df | Sig. |
|--------------------|---------|----|------|
| Overall Statistics | 308,132 | 37 | ,000 |

## Block 1: Method = Enter

## Omnibus Tests of Model Coefficients

|             | Chi-square | df | Sig. |
|-------------|------------|----|------|
| Step 1 Step | 316,220    | 37 | ,000 |
| Block       | 316,220    | 37 | ,000 |
| Model       | 316,220    | 37 | ,000 |

## Model Summary

| Step | -2 Log likelihood     | Cox & Snell R Square | Nagelkerke R Square |
|------|-----------------------|----------------------|---------------------|
| 1    | 5880,652 <sup>a</sup> | ,025                 | ,064                |

a. Estimation terminated at iteration number 7 because parameter estimates changed by less than ,001.

Classification Table<sup>a</sup>

| Observed           |                                                |                                     |                       |
|--------------------|------------------------------------------------|-------------------------------------|-----------------------|
| Step 1             | luonnelt1 luonne highest = tapahtui potilaalle | 0 ingen händelse eller läheltä piti | 1 tapahtui potilaalle |
| Overall Percentage |                                                |                                     |                       |

Classification Table<sup>a</sup>

| Observed           |                                                | Predicted                           |       |
|--------------------|------------------------------------------------|-------------------------------------|-------|
|                    |                                                | luonnelt1 luonne highest = ...      |       |
|                    |                                                | 0 ingen händelse eller läheltä piti |       |
| Step 1             | luonnelt1 luonne highest = tapahtui potilaalle | 0 ingen händelse eller läheltä piti | 11627 |
| Overall Percentage |                                                | 1 tapahtui potilaalle               | 848   |

Classification Table<sup>a</sup>

| Observed           |                                                | Predicted                           |                          |
|--------------------|------------------------------------------------|-------------------------------------|--------------------------|
|                    |                                                | luonnelt1<br>luonne highest ...     | 1 tapahtui<br>potilaalle |
| Step 1             | luonnelt1 luonne highest = tapahtui potilaalle | 0 ingen händelse eller läheltä piti | 0                        |
|                    |                                                | 1 tapahtui potilaalle               | 0                        |
| Overall Percentage |                                                |                                     |                          |

Classification Table<sup>a</sup>

| Observed           |                                                | Predicted                           |       |
|--------------------|------------------------------------------------|-------------------------------------|-------|
|                    |                                                | Percentage<br>Correct               |       |
| Step 1             | luonnelt1 luonne highest = tapahtui potilaalle | 0 ingen händelse eller läheltä piti | 100,0 |
|                    |                                                | 1 tapahtui potilaalle               | ,0    |
| Overall Percentage |                                                |                                     | 93,2  |

a. The cut value is ,500

## Variables in the Equation

|                         | B      | S.E. | Wald    | df | Sig. | Exp(B) |
|-------------------------|--------|------|---------|----|------|--------|
| Step 1 <sup>a</sup> bv2 |        |      | 8,836   | 2  | ,012 |        |
| bv2(1)                  | -,178  | ,103 | 3,024   | 1  | ,082 | ,837   |
| bv2(2)                  | ,092   | ,094 | ,963    | 1  | ,326 | 1,097  |
| VASTY2                  |        |      | 238,156 | 35 | ,000 |        |
| VASTY2(1)               | ,083   | ,299 | ,077    | 1  | ,781 | 1,087  |
| VASTY2(2)               | ,540   | ,274 | 3,877   | 1  | ,049 | 1,717  |
| VASTY2(3)               | -1,490 | ,466 | 10,218  | 1  | ,001 | ,225   |
| VASTY2(4)               | ,133   | ,293 | ,205    | 1  | ,651 | 1,142  |
| VASTY2(5)               | -,194  | ,325 | ,356    | 1  | ,551 | ,824   |
| VASTY2(6)               | -1,289 | ,439 | 8,622   | 1  | ,003 | ,276   |
| VASTY2(7)               | ,539   | ,275 | 3,839   | 1  | ,050 | 1,714  |
| VASTY2(8)               | -,263  | ,320 | ,677    | 1  | ,411 | ,768   |
| VASTY2(9)               | ,261   | ,291 | ,805    | 1  | ,370 | 1,298  |
| VASTY2(10)              | 1,022  | ,258 | 15,652  | 1  | ,000 | 2,778  |
| VASTY2(11)              | ,614   | ,272 | 5,092   | 1  | ,024 | 1,848  |
| VASTY2(12)              | ,120   | ,295 | ,166    | 1  | ,684 | 1,128  |
| VASTY2(13)              | ,971   | ,260 | 13,951  | 1  | ,000 | 2,642  |
| VASTY2(14)              | -,258  | ,320 | ,650    | 1  | ,420 | ,773   |
| VASTY2(15)              | ,240   | ,288 | ,696    | 1  | ,404 | 1,272  |
| VASTY2(16)              | ,509   | ,330 | 2,390   | 1  | ,122 | 1,664  |
| VASTY2(17)              | -1,076 | ,418 | 6,639   | 1  | ,010 | ,341   |
| VASTY2(18)              | -,677  | ,364 | 3,445   | 1  | ,063 | ,508   |
| VASTY2(19)              | -1,680 | ,549 | 9,351   | 1  | ,002 | ,186   |
| VASTY2(20)              | ,071   | ,314 | ,052    | 1  | ,820 | 1,074  |
| VASTY2(21)              | -,126  | ,312 | ,164    | 1  | ,685 | ,881   |
| VASTY2(22)              | ,322   | ,291 | 1,227   | 1  | ,268 | 1,380  |
| VASTY2(23)              | ,298   | ,288 | 1,069   | 1  | ,301 | 1,347  |
| VASTY2(24)              | ,280   | ,286 | ,958    | 1  | ,328 | 1,322  |
| VASTY2(25)              | ,347   | ,300 | 1,337   | 1  | ,248 | 1,415  |
| VASTY2(26)              | -,913  | ,419 | 4,751   | 1  | ,029 | ,401   |
| VASTY2(27)              | -1,455 | ,465 | 9,774   | 1  | ,002 | ,233   |
| VASTY2(28)              | -,986  | ,467 | 4,448   | 1  | ,035 | ,373   |
| VASTY2(29)              | -1,016 | ,401 | 6,424   | 1  | ,011 | ,362   |
| VASTY2(30)              | -,182  | ,315 | ,333    | 1  | ,564 | ,834   |
| VASTY2(31)              | ,508   | ,277 | 3,352   | 1  | ,067 | 1,662  |
| VASTY2(32)              | -,056  | ,312 | ,033    | 1  | ,857 | ,945   |
| VASTY2(33)              | ,020   | ,305 | ,004    | 1  | ,948 | 1,020  |
| VASTY2(34)              | -1,251 | ,438 | 8,136   | 1  | ,004 | ,286   |
| VASTY2(35)              | ,677   | ,277 | 5,975   | 1  | ,015 | 1,968  |
| Constant                | -2,650 | ,223 | 140,917 | 1  | ,000 | ,071   |

## Variables in the Equation

|                     |            | 95% C.I. for EXP(B) |       |
|---------------------|------------|---------------------|-------|
|                     |            | Lower               | Upper |
| Step 1 <sup>a</sup> | bv2        |                     |       |
|                     | bv2(1)     | ,684                | 1,023 |
|                     | bv2(2)     | ,912                | 1,318 |
|                     | VASTY2     |                     |       |
|                     | VASTY2(1)  | ,605                | 1,953 |
|                     | VASTY2(2)  | 1,002               | 2,940 |
|                     | VASTY2(3)  | ,090                | ,562  |
|                     | VASTY2(4)  | ,643                | 2,029 |
|                     | VASTY2(5)  | ,436                | 1,557 |
|                     | VASTY2(6)  | ,117                | ,651  |
|                     | VASTY2(7)  | 1,000               | 2,940 |
|                     | VASTY2(8)  | ,410                | 1,439 |
|                     | VASTY2(9)  | ,734                | 2,297 |
|                     | VASTY2(10) | 1,675               | 4,608 |
|                     | VASTY2(11) | 1,084               | 3,149 |
|                     | VASTY2(12) | ,633                | 2,008 |
|                     | VASTY2(13) | 1,587               | 4,398 |
|                     | VASTY2(14) | ,413                | 1,447 |
|                     | VASTY2(15) | ,723                | 2,237 |
|                     | VASTY2(16) | ,872                | 3,175 |
|                     | VASTY2(17) | ,150                | ,773  |
|                     | VASTY2(18) | ,249                | 1,039 |
|                     | VASTY2(19) | ,064                | ,547  |
|                     | VASTY2(20) | ,581                | 1,985 |
|                     | VASTY2(21) | ,478                | 1,624 |
|                     | VASTY2(22) | ,780                | 2,440 |
|                     | VASTY2(23) | ,766                | 2,367 |
|                     | VASTY2(24) | ,756                | 2,315 |
|                     | VASTY2(25) | ,785                | 2,550 |
|                     | VASTY2(26) | ,177                | ,912  |
|                     | VASTY2(27) | ,094                | ,581  |
|                     | VASTY2(28) | ,149                | ,933  |
|                     | VASTY2(29) | ,165                | ,794  |
|                     | VASTY2(30) | ,449                | 1,547 |
|                     | VASTY2(31) | ,965                | 2,862 |
|                     | VASTY2(32) | ,513                | 1,742 |
|                     | VASTY2(33) | ,561                | 1,855 |
|                     | VASTY2(34) | ,121                | ,676  |
|                     | VASTY2(35) | 1,144               | 3,387 |
|                     | Constant   |                     |       |

a. Variable(s) entered on step 1: bv2, VASTY2.

```

1
2
3 LOGISTIC REGRESSION VARIABLES luonnelt1
4   /METHOD=ENTER bv3 VASTY2
5   /CONTRAST (bv3)=Indicator(1)
6   /CONTRAST (VASTY2)=Indicator(1)
7   /PRINT=CI(95)
8   /CRITERIA=PIN(0.05) POUT(0.10) ITERATE(20) CUT(0.5).
9
10
11

```

## Logistic Regression

[DataSet6] C:\cWordjan\Rafaela\_VCS\alla\_tillsammans\abo\_bjo\_vasa\_v1.sav

### Case Processing Summary

| Unweighted Cases <sup>a</sup> |                      | N     | Percent |
|-------------------------------|----------------------|-------|---------|
| Selected Cases                | Included in Analysis | 12475 | 100,0   |
|                               | Missing Cases        | 0     | ,0      |
|                               | Total                | 12475 | 100,0   |
| Unselected Cases              |                      | 0     | ,0      |
| Total                         |                      | 12475 | 100,0   |

a. If weight is in effect, see classification table for the total number of cases.

### Dependent Variable Encoding

| Original Value                      | Internal Value |
|-------------------------------------|----------------|
| 0 ingen händelse eller läheltä piti | 0              |
| 1 tapahtui potilaalle               | 1              |

## Categorical Variables Codings

|                                              |                   | Frequency | Parameter coding |       |
|----------------------------------------------|-------------------|-----------|------------------|-------|
|                                              |                   |           | (1)              | (2)   |
| VASTY2 (SAIR*10000)+VASTY                    | 403073101         | 365       | ,000             | ,000  |
|                                              | 403073102         | 362       | 1,000            | ,000  |
|                                              | 403073103         | 365       | ,000             | 1,000 |
|                                              | 403073202         | 365       | ,000             | ,000  |
|                                              | 403073203         | 365       | ,000             | ,000  |
|                                              | 403073204         | 330       | ,000             | ,000  |
|                                              | 403073303         | 364       | ,000             | ,000  |
|                                              | 403073651         | 362       | ,000             | ,000  |
|                                              | 403073771         | 365       | ,000             | ,000  |
|                                              | 403133102         | 341       | ,000             | ,000  |
|                                              | 403133106         | 365       | ,000             | ,000  |
|                                              | 403133107         | 365       | ,000             | ,000  |
|                                              | 403133109         | 365       | ,000             | ,000  |
|                                              | 403133202         | 365       | ,000             | ,000  |
|                                              | 403133203         | 365       | ,000             | ,000  |
|                                              | 403133204         | 365       | ,000             | ,000  |
|                                              | 403133315         | 177       | ,000             | ,000  |
|                                              | 403133322         | 365       | ,000             | ,000  |
|                                              | 403133401         | 362       | ,000             | ,000  |
|                                              | 403133402         | 365       | ,000             | ,000  |
|                                              | 403133550         | 298       | ,000             | ,000  |
|                                              | 403133772         | 365       | ,000             | ,000  |
|                                              | 403135803         | 365       | ,000             | ,000  |
|                                              | 404060001         | 365       | ,000             | ,000  |
|                                              | 404060002         | 366       | ,000             | ,000  |
|                                              | 404310003         | 291       | ,000             | ,000  |
|                                              | 404310004         | 291       | ,000             | ,000  |
|                                              | 502300005         | 366       | ,000             | ,000  |
|                                              | 502300006         | 225       | ,000             | ,000  |
|                                              | 502300007         | 366       | ,000             | ,000  |
|                                              | 502300214         | 366       | ,000             | ,000  |
|                                              | 502300411         | 366       | ,000             | ,000  |
|                                              | 502300415         | 360       | ,000             | ,000  |
|                                              | 502300416         | 363       | ,000             | ,000  |
|                                              | 502300811         | 364       | ,000             | ,000  |
|                                              | 502300913         | 315       | ,000             | ,000  |
| bv3 belasnting vs paoncil dubbla intervallet | 1 medelbelastning | 9121      | ,000             | ,000  |
|                                              | 2 underbelastning | 1505      | 1,000            | ,000  |
|                                              | 3 överbelastning  | 1849      | ,000             | 1,000 |

## Categorical Variables Codings

|                                              |                   | Parameter coding |       |       |
|----------------------------------------------|-------------------|------------------|-------|-------|
|                                              |                   | (3)              | (4)   | (5)   |
| VASTY2 (SAIR*10000)+VASTY                    | 403073101         | ,000             | ,000  | ,000  |
|                                              | 403073102         | ,000             | ,000  | ,000  |
|                                              | 403073103         | ,000             | ,000  | ,000  |
|                                              | 403073202         | 1,000            | ,000  | ,000  |
|                                              | 403073203         | ,000             | 1,000 | ,000  |
|                                              | 403073204         | ,000             | ,000  | 1,000 |
|                                              | 403073303         | ,000             | ,000  | ,000  |
|                                              | 403073651         | ,000             | ,000  | ,000  |
|                                              | 403073771         | ,000             | ,000  | ,000  |
|                                              | 403133102         | ,000             | ,000  | ,000  |
|                                              | 403133106         | ,000             | ,000  | ,000  |
|                                              | 403133107         | ,000             | ,000  | ,000  |
|                                              | 403133109         | ,000             | ,000  | ,000  |
|                                              | 403133202         | ,000             | ,000  | ,000  |
|                                              | 403133203         | ,000             | ,000  | ,000  |
|                                              | 403133204         | ,000             | ,000  | ,000  |
|                                              | 403133315         | ,000             | ,000  | ,000  |
|                                              | 403133322         | ,000             | ,000  | ,000  |
|                                              | 403133401         | ,000             | ,000  | ,000  |
|                                              | 403133402         | ,000             | ,000  | ,000  |
|                                              | 403133550         | ,000             | ,000  | ,000  |
|                                              | 403133772         | ,000             | ,000  | ,000  |
|                                              | 403135803         | ,000             | ,000  | ,000  |
|                                              | 404060001         | ,000             | ,000  | ,000  |
|                                              | 404060002         | ,000             | ,000  | ,000  |
|                                              | 404310003         | ,000             | ,000  | ,000  |
|                                              | 404310004         | ,000             | ,000  | ,000  |
|                                              | 502300005         | ,000             | ,000  | ,000  |
|                                              | 502300006         | ,000             | ,000  | ,000  |
|                                              | 502300007         | ,000             | ,000  | ,000  |
|                                              | 502300214         | ,000             | ,000  | ,000  |
|                                              | 502300411         | ,000             | ,000  | ,000  |
|                                              | 502300415         | ,000             | ,000  | ,000  |
|                                              | 502300416         | ,000             | ,000  | ,000  |
|                                              | 502300811         | ,000             | ,000  | ,000  |
|                                              | 502300913         | ,000             | ,000  | ,000  |
| bv3 belasnting vs paoncil dubbla intervallet | 1 medelbelastning |                  |       |       |
|                                              | 2 underbelastning |                  |       |       |
|                                              | 3 överbelastning  |                  |       |       |

## Categorical Variables Codings

|                                              |                   | Parameter coding |       |       |
|----------------------------------------------|-------------------|------------------|-------|-------|
|                                              |                   | (6)              | (7)   | (8)   |
| VASTY2 (SAIR*10000)+VASTY                    | 403073101         | ,000             | ,000  | ,000  |
|                                              | 403073102         | ,000             | ,000  | ,000  |
|                                              | 403073103         | ,000             | ,000  | ,000  |
|                                              | 403073202         | ,000             | ,000  | ,000  |
|                                              | 403073203         | ,000             | ,000  | ,000  |
|                                              | 403073204         | ,000             | ,000  | ,000  |
|                                              | 403073303         | 1,000            | ,000  | ,000  |
|                                              | 403073651         | ,000             | 1,000 | ,000  |
|                                              | 403073771         | ,000             | ,000  | 1,000 |
|                                              | 403133102         | ,000             | ,000  | ,000  |
|                                              | 403133106         | ,000             | ,000  | ,000  |
|                                              | 403133107         | ,000             | ,000  | ,000  |
|                                              | 403133109         | ,000             | ,000  | ,000  |
|                                              | 403133202         | ,000             | ,000  | ,000  |
|                                              | 403133203         | ,000             | ,000  | ,000  |
|                                              | 403133204         | ,000             | ,000  | ,000  |
|                                              | 403133315         | ,000             | ,000  | ,000  |
|                                              | 403133322         | ,000             | ,000  | ,000  |
|                                              | 403133401         | ,000             | ,000  | ,000  |
|                                              | 403133402         | ,000             | ,000  | ,000  |
|                                              | 403133550         | ,000             | ,000  | ,000  |
|                                              | 403133772         | ,000             | ,000  | ,000  |
|                                              | 403135803         | ,000             | ,000  | ,000  |
|                                              | 404060001         | ,000             | ,000  | ,000  |
|                                              | 404060002         | ,000             | ,000  | ,000  |
|                                              | 404310003         | ,000             | ,000  | ,000  |
|                                              | 404310004         | ,000             | ,000  | ,000  |
|                                              | 502300005         | ,000             | ,000  | ,000  |
|                                              | 502300006         | ,000             | ,000  | ,000  |
|                                              | 502300007         | ,000             | ,000  | ,000  |
|                                              | 502300214         | ,000             | ,000  | ,000  |
|                                              | 502300411         | ,000             | ,000  | ,000  |
|                                              | 502300415         | ,000             | ,000  | ,000  |
|                                              | 502300416         | ,000             | ,000  | ,000  |
|                                              | 502300811         | ,000             | ,000  | ,000  |
|                                              | 502300913         | ,000             | ,000  | ,000  |
| bv3 belasnting vs paoncil dubbla intervallet | 1 medelbelastning |                  |       |       |
|                                              | 2 underbelastning |                  |       |       |
|                                              | 3 överbelastning  |                  |       |       |



## Categorical Variables Codings

|                                              |                   | Parameter coding |       |       |
|----------------------------------------------|-------------------|------------------|-------|-------|
|                                              |                   | (9)              | (10)  | (11)  |
| VASTY2 (SAIR*10000)+VASTY                    | 403073101         | ,000             | ,000  | ,000  |
|                                              | 403073102         | ,000             | ,000  | ,000  |
|                                              | 403073103         | ,000             | ,000  | ,000  |
|                                              | 403073202         | ,000             | ,000  | ,000  |
|                                              | 403073203         | ,000             | ,000  | ,000  |
|                                              | 403073204         | ,000             | ,000  | ,000  |
|                                              | 403073303         | ,000             | ,000  | ,000  |
|                                              | 403073651         | ,000             | ,000  | ,000  |
|                                              | 403073771         | ,000             | ,000  | ,000  |
|                                              | 403133102         | 1,000            | ,000  | ,000  |
|                                              | 403133106         | ,000             | 1,000 | ,000  |
|                                              | 403133107         | ,000             | ,000  | 1,000 |
|                                              | 403133109         | ,000             | ,000  | ,000  |
|                                              | 403133202         | ,000             | ,000  | ,000  |
|                                              | 403133203         | ,000             | ,000  | ,000  |
|                                              | 403133204         | ,000             | ,000  | ,000  |
|                                              | 403133315         | ,000             | ,000  | ,000  |
|                                              | 403133322         | ,000             | ,000  | ,000  |
|                                              | 403133401         | ,000             | ,000  | ,000  |
|                                              | 403133402         | ,000             | ,000  | ,000  |
|                                              | 403133550         | ,000             | ,000  | ,000  |
|                                              | 403133772         | ,000             | ,000  | ,000  |
|                                              | 403135803         | ,000             | ,000  | ,000  |
|                                              | 404060001         | ,000             | ,000  | ,000  |
|                                              | 404060002         | ,000             | ,000  | ,000  |
|                                              | 404310003         | ,000             | ,000  | ,000  |
|                                              | 404310004         | ,000             | ,000  | ,000  |
|                                              | 502300005         | ,000             | ,000  | ,000  |
|                                              | 502300006         | ,000             | ,000  | ,000  |
|                                              | 502300007         | ,000             | ,000  | ,000  |
|                                              | 502300214         | ,000             | ,000  | ,000  |
|                                              | 502300411         | ,000             | ,000  | ,000  |
|                                              | 502300415         | ,000             | ,000  | ,000  |
|                                              | 502300416         | ,000             | ,000  | ,000  |
|                                              | 502300811         | ,000             | ,000  | ,000  |
|                                              | 502300913         | ,000             | ,000  | ,000  |
| bv3 belasnting vs paoncil dubbla intervallet | 1 medelbelastning |                  |       |       |
|                                              | 2 underbelastning |                  |       |       |
|                                              | 3 överbelastning  |                  |       |       |

## Categorical Variables Codings

|                                              |                   | Parameter coding |       |       |
|----------------------------------------------|-------------------|------------------|-------|-------|
|                                              |                   | (12)             | (13)  | (14)  |
| VASTY2 (SAIR*10000)+VASTY                    | 403073101         | ,000             | ,000  | ,000  |
|                                              | 403073102         | ,000             | ,000  | ,000  |
|                                              | 403073103         | ,000             | ,000  | ,000  |
|                                              | 403073202         | ,000             | ,000  | ,000  |
|                                              | 403073203         | ,000             | ,000  | ,000  |
|                                              | 403073204         | ,000             | ,000  | ,000  |
|                                              | 403073303         | ,000             | ,000  | ,000  |
|                                              | 403073651         | ,000             | ,000  | ,000  |
|                                              | 403073771         | ,000             | ,000  | ,000  |
|                                              | 403133102         | ,000             | ,000  | ,000  |
|                                              | 403133106         | ,000             | ,000  | ,000  |
|                                              | 403133107         | ,000             | ,000  | ,000  |
|                                              | 403133109         | 1,000            | ,000  | ,000  |
|                                              | 403133202         | ,000             | 1,000 | ,000  |
|                                              | 403133203         | ,000             | ,000  | 1,000 |
|                                              | 403133204         | ,000             | ,000  | ,000  |
|                                              | 403133315         | ,000             | ,000  | ,000  |
|                                              | 403133322         | ,000             | ,000  | ,000  |
|                                              | 403133401         | ,000             | ,000  | ,000  |
|                                              | 403133402         | ,000             | ,000  | ,000  |
|                                              | 403133550         | ,000             | ,000  | ,000  |
|                                              | 403133772         | ,000             | ,000  | ,000  |
|                                              | 403135803         | ,000             | ,000  | ,000  |
|                                              | 404060001         | ,000             | ,000  | ,000  |
|                                              | 404060002         | ,000             | ,000  | ,000  |
|                                              | 404310003         | ,000             | ,000  | ,000  |
|                                              | 404310004         | ,000             | ,000  | ,000  |
|                                              | 502300005         | ,000             | ,000  | ,000  |
|                                              | 502300006         | ,000             | ,000  | ,000  |
|                                              | 502300007         | ,000             | ,000  | ,000  |
|                                              | 502300214         | ,000             | ,000  | ,000  |
|                                              | 502300411         | ,000             | ,000  | ,000  |
|                                              | 502300415         | ,000             | ,000  | ,000  |
|                                              | 502300416         | ,000             | ,000  | ,000  |
|                                              | 502300811         | ,000             | ,000  | ,000  |
|                                              | 502300913         | ,000             | ,000  | ,000  |
| bv3 belasnting vs paoncil dubbla intervallet | 1 medelbelastning |                  |       |       |
|                                              | 2 underbelastning |                  |       |       |
|                                              | 3 överbelastning  |                  |       |       |

## Categorical Variables Codings

|                                              |                   | Parameter coding |       |       |
|----------------------------------------------|-------------------|------------------|-------|-------|
|                                              |                   | (15)             | (16)  | (17)  |
| VASTY2 (SAIR*10000)+VASTY                    | 403073101         | ,000             | ,000  | ,000  |
|                                              | 403073102         | ,000             | ,000  | ,000  |
|                                              | 403073103         | ,000             | ,000  | ,000  |
|                                              | 403073202         | ,000             | ,000  | ,000  |
|                                              | 403073203         | ,000             | ,000  | ,000  |
|                                              | 403073204         | ,000             | ,000  | ,000  |
|                                              | 403073303         | ,000             | ,000  | ,000  |
|                                              | 403073651         | ,000             | ,000  | ,000  |
|                                              | 403073771         | ,000             | ,000  | ,000  |
|                                              | 403133102         | ,000             | ,000  | ,000  |
|                                              | 403133106         | ,000             | ,000  | ,000  |
|                                              | 403133107         | ,000             | ,000  | ,000  |
|                                              | 403133109         | ,000             | ,000  | ,000  |
|                                              | 403133202         | ,000             | ,000  | ,000  |
|                                              | 403133203         | ,000             | ,000  | ,000  |
|                                              | 403133204         | 1,000            | ,000  | ,000  |
|                                              | 403133315         | ,000             | 1,000 | ,000  |
|                                              | 403133322         | ,000             | ,000  | 1,000 |
|                                              | 403133401         | ,000             | ,000  | ,000  |
|                                              | 403133402         | ,000             | ,000  | ,000  |
|                                              | 403133550         | ,000             | ,000  | ,000  |
|                                              | 403133772         | ,000             | ,000  | ,000  |
|                                              | 403135803         | ,000             | ,000  | ,000  |
|                                              | 404060001         | ,000             | ,000  | ,000  |
|                                              | 404060002         | ,000             | ,000  | ,000  |
|                                              | 404310003         | ,000             | ,000  | ,000  |
|                                              | 404310004         | ,000             | ,000  | ,000  |
|                                              | 502300005         | ,000             | ,000  | ,000  |
|                                              | 502300006         | ,000             | ,000  | ,000  |
|                                              | 502300007         | ,000             | ,000  | ,000  |
|                                              | 502300214         | ,000             | ,000  | ,000  |
|                                              | 502300411         | ,000             | ,000  | ,000  |
|                                              | 502300415         | ,000             | ,000  | ,000  |
|                                              | 502300416         | ,000             | ,000  | ,000  |
|                                              | 502300811         | ,000             | ,000  | ,000  |
|                                              | 502300913         | ,000             | ,000  | ,000  |
| bv3 belasnting vs paoncil dubbla intervallet | 1 medelbelastning |                  |       |       |
|                                              | 2 underbelastning |                  |       |       |
|                                              | 3 överbelastning  |                  |       |       |

## Categorical Variables Codings

|                                              |                   | Parameter coding |       |       |
|----------------------------------------------|-------------------|------------------|-------|-------|
|                                              |                   | (18)             | (19)  | (20)  |
| VASTY2 (SAIR*10000)+VASTY                    | 403073101         | ,000             | ,000  | ,000  |
|                                              | 403073102         | ,000             | ,000  | ,000  |
|                                              | 403073103         | ,000             | ,000  | ,000  |
|                                              | 403073202         | ,000             | ,000  | ,000  |
|                                              | 403073203         | ,000             | ,000  | ,000  |
|                                              | 403073204         | ,000             | ,000  | ,000  |
|                                              | 403073303         | ,000             | ,000  | ,000  |
|                                              | 403073651         | ,000             | ,000  | ,000  |
|                                              | 403073771         | ,000             | ,000  | ,000  |
|                                              | 403133102         | ,000             | ,000  | ,000  |
|                                              | 403133106         | ,000             | ,000  | ,000  |
|                                              | 403133107         | ,000             | ,000  | ,000  |
|                                              | 403133109         | ,000             | ,000  | ,000  |
|                                              | 403133202         | ,000             | ,000  | ,000  |
|                                              | 403133203         | ,000             | ,000  | ,000  |
|                                              | 403133204         | ,000             | ,000  | ,000  |
|                                              | 403133315         | ,000             | ,000  | ,000  |
|                                              | 403133322         | ,000             | ,000  | ,000  |
|                                              | 403133401         | 1,000            | ,000  | ,000  |
|                                              | 403133402         | ,000             | 1,000 | ,000  |
|                                              | 403133550         | ,000             | ,000  | 1,000 |
|                                              | 403133772         | ,000             | ,000  | ,000  |
|                                              | 403135803         | ,000             | ,000  | ,000  |
|                                              | 404060001         | ,000             | ,000  | ,000  |
|                                              | 404060002         | ,000             | ,000  | ,000  |
|                                              | 404310003         | ,000             | ,000  | ,000  |
|                                              | 404310004         | ,000             | ,000  | ,000  |
|                                              | 502300005         | ,000             | ,000  | ,000  |
|                                              | 502300006         | ,000             | ,000  | ,000  |
|                                              | 502300007         | ,000             | ,000  | ,000  |
|                                              | 502300214         | ,000             | ,000  | ,000  |
|                                              | 502300411         | ,000             | ,000  | ,000  |
|                                              | 502300415         | ,000             | ,000  | ,000  |
|                                              | 502300416         | ,000             | ,000  | ,000  |
|                                              | 502300811         | ,000             | ,000  | ,000  |
|                                              | 502300913         | ,000             | ,000  | ,000  |
| bv3 belasnting vs paoncil dubbla intervallet | 1 medelbelastning |                  |       |       |
|                                              | 2 underbelastning |                  |       |       |
|                                              | 3 överbelastning  |                  |       |       |

## Categorical Variables Codings

|                                              |                   | Parameter coding |       |       |
|----------------------------------------------|-------------------|------------------|-------|-------|
|                                              |                   | (21)             | (22)  | (23)  |
| VASTY2 (SAIR*10000)+VASTY                    | 403073101         | ,000             | ,000  | ,000  |
|                                              | 403073102         | ,000             | ,000  | ,000  |
|                                              | 403073103         | ,000             | ,000  | ,000  |
|                                              | 403073202         | ,000             | ,000  | ,000  |
|                                              | 403073203         | ,000             | ,000  | ,000  |
|                                              | 403073204         | ,000             | ,000  | ,000  |
|                                              | 403073303         | ,000             | ,000  | ,000  |
|                                              | 403073651         | ,000             | ,000  | ,000  |
|                                              | 403073771         | ,000             | ,000  | ,000  |
|                                              | 403133102         | ,000             | ,000  | ,000  |
|                                              | 403133106         | ,000             | ,000  | ,000  |
|                                              | 403133107         | ,000             | ,000  | ,000  |
|                                              | 403133109         | ,000             | ,000  | ,000  |
|                                              | 403133202         | ,000             | ,000  | ,000  |
|                                              | 403133203         | ,000             | ,000  | ,000  |
|                                              | 403133204         | ,000             | ,000  | ,000  |
|                                              | 403133315         | ,000             | ,000  | ,000  |
|                                              | 403133322         | ,000             | ,000  | ,000  |
|                                              | 403133401         | ,000             | ,000  | ,000  |
|                                              | 403133402         | ,000             | ,000  | ,000  |
|                                              | 403133550         | ,000             | ,000  | ,000  |
|                                              | 403133772         | 1,000            | ,000  | ,000  |
|                                              | 403135803         | ,000             | 1,000 | ,000  |
|                                              | 404060001         | ,000             | ,000  | 1,000 |
|                                              | 404060002         | ,000             | ,000  | ,000  |
|                                              | 404310003         | ,000             | ,000  | ,000  |
|                                              | 404310004         | ,000             | ,000  | ,000  |
|                                              | 502300005         | ,000             | ,000  | ,000  |
|                                              | 502300006         | ,000             | ,000  | ,000  |
|                                              | 502300007         | ,000             | ,000  | ,000  |
|                                              | 502300214         | ,000             | ,000  | ,000  |
|                                              | 502300411         | ,000             | ,000  | ,000  |
|                                              | 502300415         | ,000             | ,000  | ,000  |
|                                              | 502300416         | ,000             | ,000  | ,000  |
|                                              | 502300811         | ,000             | ,000  | ,000  |
|                                              | 502300913         | ,000             | ,000  | ,000  |
| bv3 belasnting vs paoncil dubbla intervallet | 1 medelbelastning |                  |       |       |
|                                              | 2 underbelastning |                  |       |       |
|                                              | 3 överbelastning  |                  |       |       |

## Categorical Variables Codings

|                                              |                   | Parameter coding |       |       |
|----------------------------------------------|-------------------|------------------|-------|-------|
|                                              |                   | (24)             | (25)  | (26)  |
| VASTY2 (SAIR*10000)+VASTY                    | 403073101         | ,000             | ,000  | ,000  |
|                                              | 403073102         | ,000             | ,000  | ,000  |
|                                              | 403073103         | ,000             | ,000  | ,000  |
|                                              | 403073202         | ,000             | ,000  | ,000  |
|                                              | 403073203         | ,000             | ,000  | ,000  |
|                                              | 403073204         | ,000             | ,000  | ,000  |
|                                              | 403073303         | ,000             | ,000  | ,000  |
|                                              | 403073651         | ,000             | ,000  | ,000  |
|                                              | 403073771         | ,000             | ,000  | ,000  |
|                                              | 403133102         | ,000             | ,000  | ,000  |
|                                              | 403133106         | ,000             | ,000  | ,000  |
|                                              | 403133107         | ,000             | ,000  | ,000  |
|                                              | 403133109         | ,000             | ,000  | ,000  |
|                                              | 403133202         | ,000             | ,000  | ,000  |
|                                              | 403133203         | ,000             | ,000  | ,000  |
|                                              | 403133204         | ,000             | ,000  | ,000  |
|                                              | 403133315         | ,000             | ,000  | ,000  |
|                                              | 403133322         | ,000             | ,000  | ,000  |
|                                              | 403133401         | ,000             | ,000  | ,000  |
|                                              | 403133402         | ,000             | ,000  | ,000  |
|                                              | 403133550         | ,000             | ,000  | ,000  |
|                                              | 403133772         | ,000             | ,000  | ,000  |
|                                              | 403135803         | ,000             | ,000  | ,000  |
|                                              | 404060001         | ,000             | ,000  | ,000  |
|                                              | 404060002         | 1,000            | ,000  | ,000  |
|                                              | 404310003         | ,000             | 1,000 | ,000  |
|                                              | 404310004         | ,000             | ,000  | 1,000 |
|                                              | 502300005         | ,000             | ,000  | ,000  |
|                                              | 502300006         | ,000             | ,000  | ,000  |
|                                              | 502300007         | ,000             | ,000  | ,000  |
|                                              | 502300214         | ,000             | ,000  | ,000  |
|                                              | 502300411         | ,000             | ,000  | ,000  |
|                                              | 502300415         | ,000             | ,000  | ,000  |
|                                              | 502300416         | ,000             | ,000  | ,000  |
|                                              | 502300811         | ,000             | ,000  | ,000  |
|                                              | 502300913         | ,000             | ,000  | ,000  |
| bv3 belasnting vs paoncil dubbla intervallet | 1 medelbelastning |                  |       |       |
|                                              | 2 underbelastning |                  |       |       |
|                                              | 3 överbelastning  |                  |       |       |

## Categorical Variables Codings

|                                              |                   | Parameter coding |       |       |
|----------------------------------------------|-------------------|------------------|-------|-------|
|                                              |                   | (27)             | (28)  | (29)  |
| VASTY2 (SAIR*10000)+VASTY                    | 403073101         | ,000             | ,000  | ,000  |
|                                              | 403073102         | ,000             | ,000  | ,000  |
|                                              | 403073103         | ,000             | ,000  | ,000  |
|                                              | 403073202         | ,000             | ,000  | ,000  |
|                                              | 403073203         | ,000             | ,000  | ,000  |
|                                              | 403073204         | ,000             | ,000  | ,000  |
|                                              | 403073303         | ,000             | ,000  | ,000  |
|                                              | 403073651         | ,000             | ,000  | ,000  |
|                                              | 403073771         | ,000             | ,000  | ,000  |
|                                              | 403133102         | ,000             | ,000  | ,000  |
|                                              | 403133106         | ,000             | ,000  | ,000  |
|                                              | 403133107         | ,000             | ,000  | ,000  |
|                                              | 403133109         | ,000             | ,000  | ,000  |
|                                              | 403133202         | ,000             | ,000  | ,000  |
|                                              | 403133203         | ,000             | ,000  | ,000  |
|                                              | 403133204         | ,000             | ,000  | ,000  |
|                                              | 403133315         | ,000             | ,000  | ,000  |
|                                              | 403133322         | ,000             | ,000  | ,000  |
|                                              | 403133401         | ,000             | ,000  | ,000  |
|                                              | 403133402         | ,000             | ,000  | ,000  |
|                                              | 403133550         | ,000             | ,000  | ,000  |
|                                              | 403133772         | ,000             | ,000  | ,000  |
|                                              | 403135803         | ,000             | ,000  | ,000  |
|                                              | 404060001         | ,000             | ,000  | ,000  |
|                                              | 404060002         | ,000             | ,000  | ,000  |
|                                              | 404310003         | ,000             | ,000  | ,000  |
|                                              | 404310004         | ,000             | ,000  | ,000  |
|                                              | 502300005         | 1,000            | ,000  | ,000  |
|                                              | 502300006         | ,000             | 1,000 | ,000  |
|                                              | 502300007         | ,000             | ,000  | 1,000 |
|                                              | 502300214         | ,000             | ,000  | ,000  |
|                                              | 502300411         | ,000             | ,000  | ,000  |
|                                              | 502300415         | ,000             | ,000  | ,000  |
|                                              | 502300416         | ,000             | ,000  | ,000  |
|                                              | 502300811         | ,000             | ,000  | ,000  |
|                                              | 502300913         | ,000             | ,000  | ,000  |
| bv3 belasnting vs paoncil dubbla intervallet | 1 medelbelastning |                  |       |       |
|                                              | 2 underbelastning |                  |       |       |
|                                              | 3 överbelastning  |                  |       |       |

## Categorical Variables Codings

|                                              |                   | Parameter coding |       |       |
|----------------------------------------------|-------------------|------------------|-------|-------|
|                                              |                   | (30)             | (31)  | (32)  |
| VASTY2 (SAIR*10000)+VASTY                    | 403073101         | ,000             | ,000  | ,000  |
|                                              | 403073102         | ,000             | ,000  | ,000  |
|                                              | 403073103         | ,000             | ,000  | ,000  |
|                                              | 403073202         | ,000             | ,000  | ,000  |
|                                              | 403073203         | ,000             | ,000  | ,000  |
|                                              | 403073204         | ,000             | ,000  | ,000  |
|                                              | 403073303         | ,000             | ,000  | ,000  |
|                                              | 403073651         | ,000             | ,000  | ,000  |
|                                              | 403073771         | ,000             | ,000  | ,000  |
|                                              | 403133102         | ,000             | ,000  | ,000  |
|                                              | 403133106         | ,000             | ,000  | ,000  |
|                                              | 403133107         | ,000             | ,000  | ,000  |
|                                              | 403133109         | ,000             | ,000  | ,000  |
|                                              | 403133202         | ,000             | ,000  | ,000  |
|                                              | 403133203         | ,000             | ,000  | ,000  |
|                                              | 403133204         | ,000             | ,000  | ,000  |
|                                              | 403133315         | ,000             | ,000  | ,000  |
|                                              | 403133322         | ,000             | ,000  | ,000  |
|                                              | 403133401         | ,000             | ,000  | ,000  |
|                                              | 403133402         | ,000             | ,000  | ,000  |
|                                              | 403133550         | ,000             | ,000  | ,000  |
|                                              | 403133772         | ,000             | ,000  | ,000  |
|                                              | 403135803         | ,000             | ,000  | ,000  |
|                                              | 404060001         | ,000             | ,000  | ,000  |
|                                              | 404060002         | ,000             | ,000  | ,000  |
|                                              | 404310003         | ,000             | ,000  | ,000  |
|                                              | 404310004         | ,000             | ,000  | ,000  |
|                                              | 502300005         | ,000             | ,000  | ,000  |
|                                              | 502300006         | ,000             | ,000  | ,000  |
|                                              | 502300007         | ,000             | ,000  | ,000  |
|                                              | 502300214         | 1,000            | ,000  | ,000  |
|                                              | 502300411         | ,000             | 1,000 | ,000  |
|                                              | 502300415         | ,000             | ,000  | 1,000 |
|                                              | 502300416         | ,000             | ,000  | ,000  |
|                                              | 502300811         | ,000             | ,000  | ,000  |
|                                              | 502300913         | ,000             | ,000  | ,000  |
| bv3 belasnting vs paoncil dubbla intervallet | 1 medelbelastning |                  |       |       |
|                                              | 2 underbelastning |                  |       |       |
|                                              | 3 överbelastning  |                  |       |       |



## Categorical Variables Codings

|                                              |                   | Parameter coding |       |       |
|----------------------------------------------|-------------------|------------------|-------|-------|
|                                              |                   | (33)             | (34)  | (35)  |
| VASTY2 (SAIR*10000)+VASTY                    | 403073101         | ,000             | ,000  | ,000  |
|                                              | 403073102         | ,000             | ,000  | ,000  |
|                                              | 403073103         | ,000             | ,000  | ,000  |
|                                              | 403073202         | ,000             | ,000  | ,000  |
|                                              | 403073203         | ,000             | ,000  | ,000  |
|                                              | 403073204         | ,000             | ,000  | ,000  |
|                                              | 403073303         | ,000             | ,000  | ,000  |
|                                              | 403073651         | ,000             | ,000  | ,000  |
|                                              | 403073771         | ,000             | ,000  | ,000  |
|                                              | 403133102         | ,000             | ,000  | ,000  |
|                                              | 403133106         | ,000             | ,000  | ,000  |
|                                              | 403133107         | ,000             | ,000  | ,000  |
|                                              | 403133109         | ,000             | ,000  | ,000  |
|                                              | 403133202         | ,000             | ,000  | ,000  |
|                                              | 403133203         | ,000             | ,000  | ,000  |
|                                              | 403133204         | ,000             | ,000  | ,000  |
|                                              | 403133315         | ,000             | ,000  | ,000  |
|                                              | 403133322         | ,000             | ,000  | ,000  |
|                                              | 403133401         | ,000             | ,000  | ,000  |
|                                              | 403133402         | ,000             | ,000  | ,000  |
|                                              | 403133550         | ,000             | ,000  | ,000  |
|                                              | 403133772         | ,000             | ,000  | ,000  |
|                                              | 403135803         | ,000             | ,000  | ,000  |
|                                              | 404060001         | ,000             | ,000  | ,000  |
|                                              | 404060002         | ,000             | ,000  | ,000  |
|                                              | 404310003         | ,000             | ,000  | ,000  |
|                                              | 404310004         | ,000             | ,000  | ,000  |
|                                              | 502300005         | ,000             | ,000  | ,000  |
|                                              | 502300006         | ,000             | ,000  | ,000  |
|                                              | 502300007         | ,000             | ,000  | ,000  |
|                                              | 502300214         | ,000             | ,000  | ,000  |
|                                              | 502300411         | ,000             | ,000  | ,000  |
|                                              | 502300415         | ,000             | ,000  | ,000  |
|                                              | 502300416         | 1,000            | ,000  | ,000  |
|                                              | 502300811         | ,000             | 1,000 | ,000  |
|                                              | 502300913         | ,000             | ,000  | 1,000 |
| bv3 belasnting vs paoncil dubbla intervallet | 1 medelbelastning |                  |       |       |
|                                              | 2 underbelastning |                  |       |       |
|                                              | 3 överbelastning  |                  |       |       |

## Block 0: Beginning Block

Classification Table<sup>a,b</sup>

| Observed           |                                                |                                                              |
|--------------------|------------------------------------------------|--------------------------------------------------------------|
| Step 0             | luonnelt1 luonne highest = tapahtui potilaalle | 0 ingen händelse eller läheltä piti<br>1 tapahtui potilaalle |
| Overall Percentage |                                                |                                                              |

Classification Table<sup>a,b</sup>

| Observed           |                                                | Predicted                                                    |
|--------------------|------------------------------------------------|--------------------------------------------------------------|
|                    |                                                | luonnelt1 luonne highest = ...                               |
|                    |                                                | 0 ingen händelse eller läheltä piti                          |
| Step 0             | luonnelt1 luonne highest = tapahtui potilaalle | 0 ingen händelse eller läheltä piti<br>1 tapahtui potilaalle |
| Overall Percentage |                                                | 11627<br>848                                                 |

Classification Table<sup>a,b</sup>

| Observed           |                                                | Predicted                                                    |
|--------------------|------------------------------------------------|--------------------------------------------------------------|
|                    |                                                | luonnelt1 luonne highest ...                                 |
|                    |                                                | 1 tapahtui potilaalle                                        |
| Step 0             | luonnelt1 luonne highest = tapahtui potilaalle | 0 ingen händelse eller läheltä piti<br>1 tapahtui potilaalle |
| Overall Percentage |                                                | 0<br>0                                                       |

Classification Table<sup>a,b</sup>

| Observed           |                                                | Predicted                                                    |
|--------------------|------------------------------------------------|--------------------------------------------------------------|
|                    |                                                | Percentage Correct                                           |
| Step 0             | luonnelt1 luonne highest = tapahtui potilaalle | 0 ingen händelse eller läheltä piti<br>1 tapahtui potilaalle |
| Overall Percentage |                                                | 100,0<br>,0<br>93,2                                          |

a. Constant is included in the model.

b. The cut value is ,500

## Variables in the Equation

|                 | B      | S.E. | Wald     | df | Sig. | Exp(B) |
|-----------------|--------|------|----------|----|------|--------|
| Step 0 Constant | -2,618 | ,036 | 5417,889 | 1  | ,000 | ,073   |

## Variables not in the Equation

|                  | Score   | df | Sig. |
|------------------|---------|----|------|
| Step 0 Variables |         |    |      |
| bv3              | 19,905  | 2  | ,000 |
| bv3(1)           | 15,719  | 1  | ,000 |
| bv3(2)           | 6,939   | 1  | ,008 |
| VASTY2           | 299,491 | 35 | ,000 |
| VASTY2(1)        | ,007    | 1  | ,934 |
| VASTY2(2)        | 8,968   | 1  | ,003 |
| VASTY2(3)        | 15,764  | 1  | ,000 |
| VASTY2(4)        | ,453    | 1  | ,501 |
| VASTY2(5)        | ,965    | 1  | ,326 |
| VASTY2(6)        | 14,062  | 1  | ,000 |
| VASTY2(7)        | 12,067  | 1  | ,001 |
| VASTY2(8)        | 1,504   | 1  | ,220 |
| VASTY2(9)        | 1,612   | 1  | ,204 |
| VASTY2(10)       | 55,161  | 1  | ,000 |
| VASTY2(11)       | 11,675  | 1  | ,001 |
| VASTY2(12)       | ,213    | 1  | ,644 |
| VASTY2(13)       | 55,161  | 1  | ,000 |
| VASTY2(14)       | 1,504   | 1  | ,220 |
| VASTY2(15)       | 1,199   | 1  | ,273 |
| VASTY2(16)       | 3,222   | 1  | ,073 |
| VASTY2(17)       | 12,590  | 1  | ,000 |
| VASTY2(18)       | 7,137   | 1  | ,008 |
| VASTY2(19)       | 19,294  | 1  | ,000 |
| VASTY2(20)       | ,030    | 1  | ,863 |
| VASTY2(21)       | ,647    | 1  | ,421 |
| VASTY2(22)       | ,782    | 1  | ,377 |
| VASTY2(23)       | 1,199   | 1  | ,273 |
| VASTY2(24)       | 2,253   | 1  | ,133 |
| VASTY2(25)       | 1,513   | 1  | ,219 |
| VASTY2(26)       | 7,708   | 1  | ,005 |
| VASTY2(27)       | 15,836  | 1  | ,000 |
| VASTY2(28)       | 6,172   | 1  | ,013 |
| VASTY2(29)       | 11,203  | 1  | ,001 |
| VASTY2(30)       | 1,058   | 1  | ,304 |
| VASTY2(31)       | 6,527   | 1  | ,011 |
| VASTY2(32)       | ,544    | 1  | ,461 |
| VASTY2(33)       | ,126    | 1  | ,723 |
| VASTY2(34)       | 14,062  | 1  | ,000 |
| VASTY2(35)       | 15,901  | 1  | ,000 |

## Variables not in the Equation

|                    | Score   | df | Sig. |
|--------------------|---------|----|------|
| Overall Statistics | 308,388 | 37 | ,000 |

## Block 1: Method = Enter

## Omnibus Tests of Model Coefficients

|             | Chi-square | df | Sig. |
|-------------|------------|----|------|
| Step 1 Step | 316,969    | 37 | ,000 |
| Block       | 316,969    | 37 | ,000 |
| Model       | 316,969    | 37 | ,000 |

## Model Summary

| Step | -2 Log likelihood     | Cox & Snell R Square | Nagelkerke R Square |
|------|-----------------------|----------------------|---------------------|
| 1    | 5879,903 <sup>a</sup> | ,025                 | ,064                |

a. Estimation terminated at iteration number 7 because parameter estimates changed by less than ,001.

Classification Table<sup>a</sup>

| Observed           |                                                | Predicted                           |                       |
|--------------------|------------------------------------------------|-------------------------------------|-----------------------|
| Step 1             | luonnelt1 luonne highest = tapahtui potilaalle | 0 ingen händelse eller läheltä piti | 1 tapahtui potilaalle |
| Overall Percentage |                                                |                                     |                       |

Classification Table<sup>a</sup>

| Observed           |                                                | Predicted                           |       |
|--------------------|------------------------------------------------|-------------------------------------|-------|
| Step 1             | luonnelt1 luonne highest = tapahtui potilaalle | 0 ingen händelse eller läheltä piti | 11627 |
|                    |                                                | 1 tapahtui potilaalle               | 848   |
| Overall Percentage |                                                |                                     |       |

Classification Table<sup>a</sup>

| Observed           |                                                | Predicted                           |                          |
|--------------------|------------------------------------------------|-------------------------------------|--------------------------|
|                    |                                                | luonnelt1<br>luonne highest ...     | 1 tapahtui<br>potilaalle |
| Step 1             | luonnelt1 luonne highest = tapahtui potilaalle | 0 ingen händelse eller läheltä piti | 0                        |
|                    |                                                | 1 tapahtui potilaalle               | 0                        |
| Overall Percentage |                                                |                                     |                          |

Classification Table<sup>a</sup>

| Observed           |                                                | Predicted                           |       |
|--------------------|------------------------------------------------|-------------------------------------|-------|
|                    |                                                | Percentage<br>Correct               |       |
| Step 1             | luonnelt1 luonne highest = tapahtui potilaalle | 0 ingen händelse eller läheltä piti | 100,0 |
|                    |                                                | 1 tapahtui potilaalle               | ,0    |
| Overall Percentage |                                                |                                     | 93,2  |

a. The cut value is ,500

Review only

## Variables in the Equation

|                         | B      | S.E. | Wald    | df | Sig. | Exp(B) |
|-------------------------|--------|------|---------|----|------|--------|
| Step 1 <sup>a</sup> bv3 |        |      | 9,244   | 2  | ,010 |        |
| bv3(1)                  | -,346  | ,140 | 6,122   | 1  | ,013 | ,708   |
| bv3(2)                  | ,147   | ,103 | 2,035   | 1  | ,154 | 1,158  |
| VASTY2                  |        |      | 240,353 | 35 | ,000 |        |
| VASTY2(1)               | ,122   | ,299 | ,165    | 1  | ,684 | 1,129  |
| VASTY2(2)               | ,564   | ,274 | 4,233   | 1  | ,040 | 1,758  |
| VASTY2(3)               | -1,468 | ,466 | 9,921   | 1  | ,002 | ,230   |
| VASTY2(4)               | ,150   | ,293 | ,262    | 1  | ,609 | 1,162  |
| VASTY2(5)               | -,170  | ,325 | ,275    | 1  | ,600 | ,844   |
| VASTY2(6)               | -1,276 | ,439 | 8,434   | 1  | ,004 | ,279   |
| VASTY2(7)               | ,545   | ,278 | 3,842   | 1  | ,050 | 1,725  |
| VASTY2(8)               | -,230  | ,320 | ,518    | 1  | ,472 | ,795   |
| VASTY2(9)               | ,294   | ,291 | 1,026   | 1  | ,311 | 1,342  |
| VASTY2(10)              | 1,047  | ,258 | 16,512  | 1  | ,000 | 2,850  |
| VASTY2(11)              | ,632   | ,272 | 5,388   | 1  | ,020 | 1,881  |
| VASTY2(12)              | ,150   | ,294 | ,260    | 1  | ,610 | 1,162  |
| VASTY2(13)              | 1,023  | ,258 | 15,658  | 1  | ,000 | 2,781  |
| VASTY2(14)              | -,228  | ,320 | ,509    | 1  | ,475 | ,796   |
| VASTY2(15)              | ,270   | ,288 | ,882    | 1  | ,348 | 1,310  |
| VASTY2(16)              | ,514   | ,331 | 2,418   | 1  | ,120 | 1,673  |
| VASTY2(17)              | -1,086 | ,418 | 6,766   | 1  | ,009 | ,337   |
| VASTY2(18)              | -,669  | ,365 | 3,366   | 1  | ,067 | ,512   |
| VASTY2(19)              | -1,599 | ,552 | 8,382   | 1  | ,004 | ,202   |
| VASTY2(20)              | ,087   | ,314 | ,077    | 1  | ,781 | 1,091  |
| VASTY2(21)              | -,111  | ,312 | ,127    | 1  | ,721 | ,895   |
| VASTY2(22)              | ,287   | ,290 | ,981    | 1  | ,322 | 1,333  |
| VASTY2(23)              | ,308   | ,288 | 1,145   | 1  | ,285 | 1,361  |
| VASTY2(24)              | ,293   | ,286 | 1,052   | 1  | ,305 | 1,340  |
| VASTY2(25)              | ,362   | ,301 | 1,450   | 1  | ,229 | 1,436  |
| VASTY2(26)              | -,881  | ,419 | 4,428   | 1  | ,035 | ,414   |
| VASTY2(27)              | -1,419 | ,465 | 9,305   | 1  | ,002 | ,242   |
| VASTY2(28)              | -,936  | ,467 | 4,025   | 1  | ,045 | ,392   |
| VASTY2(29)              | -1,011 | ,401 | 6,376   | 1  | ,012 | ,364   |
| VASTY2(30)              | -,184  | ,315 | ,341    | 1  | ,559 | ,832   |
| VASTY2(31)              | ,543   | ,279 | 3,785   | 1  | ,052 | 1,721  |
| VASTY2(32)              | -,014  | ,314 | ,002    | 1  | ,965 | ,986   |
| VASTY2(33)              | ,062   | ,306 | ,041    | 1  | ,839 | 1,064  |
| VASTY2(34)              | -1,244 | ,438 | 8,054   | 1  | ,005 | ,288   |
| VASTY2(35)              | ,687   | ,278 | 6,082   | 1  | ,014 | 1,987  |
| Constant                | -2,676 | ,216 | 154,004 | 1  | ,000 | ,069   |

## Variables in the Equation

|                     |            | 95% C.I. for EXP(B) |       |
|---------------------|------------|---------------------|-------|
|                     |            | Lower               | Upper |
| Step 1 <sup>a</sup> | bv3        |                     |       |
|                     | bv3(1)     | ,538                | ,931  |
|                     | bv3(2)     | ,947                | 1,417 |
|                     | VASTY2     |                     |       |
|                     | VASTY2(1)  | ,628                | 2,030 |
|                     | VASTY2(2)  | 1,027               | 3,008 |
|                     | VASTY2(3)  | ,092                | ,574  |
|                     | VASTY2(4)  | ,654                | 2,066 |
|                     | VASTY2(5)  | ,446                | 1,594 |
|                     | VASTY2(6)  | ,118                | ,660  |
|                     | VASTY2(7)  | 1,000               | 2,975 |
|                     | VASTY2(8)  | ,425                | 1,486 |
|                     | VASTY2(9)  | ,759                | 2,372 |
|                     | VASTY2(10) | 1,720               | 4,724 |
|                     | VASTY2(11) | 1,103               | 3,206 |
|                     | VASTY2(12) | ,653                | 2,067 |
|                     | VASTY2(13) | 1,676               | 4,615 |
|                     | VASTY2(14) | ,425                | 1,490 |
|                     | VASTY2(15) | ,745                | 2,303 |
|                     | VASTY2(16) | ,875                | 3,200 |
|                     | VASTY2(17) | ,149                | ,765  |
|                     | VASTY2(18) | ,251                | 1,047 |
|                     | VASTY2(19) | ,068                | ,596  |
|                     | VASTY2(20) | ,590                | 2,020 |
|                     | VASTY2(21) | ,486                | 1,648 |
|                     | VASTY2(22) | ,755                | 2,353 |
|                     | VASTY2(23) | ,774                | 2,392 |
|                     | VASTY2(24) | ,766                | 2,346 |
|                     | VASTY2(25) | ,797                | 2,589 |
|                     | VASTY2(26) | ,182                | ,941  |
|                     | VASTY2(27) | ,097                | ,602  |
|                     | VASTY2(28) | ,157                | ,979  |
|                     | VASTY2(29) | ,166                | ,797  |
|                     | VASTY2(30) | ,448                | 1,543 |
|                     | VASTY2(31) | ,996                | 2,973 |
|                     | VASTY2(32) | ,533                | 1,825 |
|                     | VASTY2(33) | ,584                | 1,939 |
|                     | VASTY2(34) | ,122                | ,681  |
|                     | VASTY2(35) | 1,151               | 3,430 |
|                     | Constant   |                     |       |

a. Variable(s) entered on step 1: bv3, VASTY2.

```

1
2
3 LOGISTIC REGRESSION VARIABLES luonnelt1
4   /METHOD=ENTER sv3 VASTY2
5   /CONTRAST (sv3)=Indicator(1)
6   /CONTRAST (VASTY2)=Indicator(1)
7   /PRINT=CI(95)
8   /CRITERIA=PIN(0.05) POUT(0.10) ITERATE(20) CUT(0.5).
9
10
11

```

## Logistic Regression

[DataSet6] C:\cWordjan\Rafaela\_VCS\alla\_tillsammans\abo\_bjo\_vasa\_v1.sav

### Case Processing Summary

| Unweighted Cases <sup>a</sup> |                      | N     | Percent |
|-------------------------------|----------------------|-------|---------|
| Selected Cases                | Included in Analysis | 12475 | 100,0   |
|                               | Missing Cases        | 0     | ,0      |
|                               | Total                | 12475 | 100,0   |
| Unselected Cases              |                      | 0     | ,0      |
| Total                         |                      | 12475 | 100,0   |

a. If weight is in effect, see classification table for the total number of cases.

### Dependent Variable Encoding

| Original Value                      | Internal Value |
|-------------------------------------|----------------|
| 0 ingen händelse eller läheltä piti | 0              |
| 1 tapahtui potilaalle               | 1              |



## Categorical Variables Codings

|                                                  | Frequency | Parameter coding |       |       |
|--------------------------------------------------|-----------|------------------|-------|-------|
|                                                  |           | (1)              | (2)   | (3)   |
| VASTY2 (SAIR*10000)+VASTY 403073101              | 365       | ,000             | ,000  | ,000  |
| 403073102                                        | 362       | 1,000            | ,000  | ,000  |
| 403073103                                        | 365       | ,000             | 1,000 | ,000  |
| 403073202                                        | 365       | ,000             | ,000  | 1,000 |
| 403073203                                        | 365       | ,000             | ,000  | ,000  |
| 403073204                                        | 330       | ,000             | ,000  | ,000  |
| 403073303                                        | 364       | ,000             | ,000  | ,000  |
| 403073651                                        | 362       | ,000             | ,000  | ,000  |
| 403073771                                        | 365       | ,000             | ,000  | ,000  |
| 403133102                                        | 341       | ,000             | ,000  | ,000  |
| 403133106                                        | 365       | ,000             | ,000  | ,000  |
| 403133107                                        | 365       | ,000             | ,000  | ,000  |
| 403133109                                        | 365       | ,000             | ,000  | ,000  |
| 403133202                                        | 365       | ,000             | ,000  | ,000  |
| 403133203                                        | 365       | ,000             | ,000  | ,000  |
| 403133204                                        | 365       | ,000             | ,000  | ,000  |
| 403133315                                        | 177       | ,000             | ,000  | ,000  |
| 403133322                                        | 365       | ,000             | ,000  | ,000  |
| 403133401                                        | 362       | ,000             | ,000  | ,000  |
| 403133402                                        | 365       | ,000             | ,000  | ,000  |
| 403133550                                        | 298       | ,000             | ,000  | ,000  |
| 403133772                                        | 365       | ,000             | ,000  | ,000  |
| 403135803                                        | 365       | ,000             | ,000  | ,000  |
| 404060001                                        | 365       | ,000             | ,000  | ,000  |
| 404060002                                        | 366       | ,000             | ,000  | ,000  |
| 404310003                                        | 291       | ,000             | ,000  | ,000  |
| 404310004                                        | 291       | ,000             | ,000  | ,000  |
| 502300005                                        | 366       | ,000             | ,000  | ,000  |
| 502300006                                        | 225       | ,000             | ,000  | ,000  |
| 502300007                                        | 366       | ,000             | ,000  | ,000  |
| 502300214                                        | 366       | ,000             | ,000  | ,000  |
| 502300411                                        | 366       | ,000             | ,000  | ,000  |
| 502300415                                        | 360       | ,000             | ,000  | ,000  |
| 502300416                                        | 363       | ,000             | ,000  | ,000  |
| 502300811                                        | 364       | ,000             | ,000  | ,000  |
| 502300913                                        | 315       | ,000             | ,000  | ,000  |
| sv3 tredjedelar för standard 1 andra tredjedelen | 3172      | ,000             | ,000  |       |
| 2 första tredjedelen                             | 4718      | 1,000            | ,000  |       |
| 3 tredje tredjedelen                             | 4585      | ,000             | 1,000 |       |

## Categorical Variables Codings

|                              |                      | Parameter coding |       |       |       |
|------------------------------|----------------------|------------------|-------|-------|-------|
|                              |                      | (4)              | (5)   | (6)   | (7)   |
| VASTY2 (SAIR*10000)+VASTY    | 403073101            | ,000             | ,000  | ,000  | ,000  |
|                              | 403073102            | ,000             | ,000  | ,000  | ,000  |
|                              | 403073103            | ,000             | ,000  | ,000  | ,000  |
|                              | 403073202            | ,000             | ,000  | ,000  | ,000  |
|                              | 403073203            | 1,000            | ,000  | ,000  | ,000  |
|                              | 403073204            | ,000             | 1,000 | ,000  | ,000  |
|                              | 403073303            | ,000             | ,000  | 1,000 | ,000  |
|                              | 403073651            | ,000             | ,000  | ,000  | 1,000 |
|                              | 403073771            | ,000             | ,000  | ,000  | ,000  |
|                              | 403133102            | ,000             | ,000  | ,000  | ,000  |
|                              | 403133106            | ,000             | ,000  | ,000  | ,000  |
|                              | 403133107            | ,000             | ,000  | ,000  | ,000  |
|                              | 403133109            | ,000             | ,000  | ,000  | ,000  |
|                              | 403133202            | ,000             | ,000  | ,000  | ,000  |
|                              | 403133203            | ,000             | ,000  | ,000  | ,000  |
|                              | 403133204            | ,000             | ,000  | ,000  | ,000  |
|                              | 403133315            | ,000             | ,000  | ,000  | ,000  |
|                              | 403133322            | ,000             | ,000  | ,000  | ,000  |
|                              | 403133401            | ,000             | ,000  | ,000  | ,000  |
|                              | 403133402            | ,000             | ,000  | ,000  | ,000  |
|                              | 403133550            | ,000             | ,000  | ,000  | ,000  |
|                              | 403133772            | ,000             | ,000  | ,000  | ,000  |
|                              | 403135803            | ,000             | ,000  | ,000  | ,000  |
|                              | 404060001            | ,000             | ,000  | ,000  | ,000  |
|                              | 404060002            | ,000             | ,000  | ,000  | ,000  |
|                              | 404310003            | ,000             | ,000  | ,000  | ,000  |
|                              | 404310004            | ,000             | ,000  | ,000  | ,000  |
|                              | 502300005            | ,000             | ,000  | ,000  | ,000  |
|                              | 502300006            | ,000             | ,000  | ,000  | ,000  |
|                              | 502300007            | ,000             | ,000  | ,000  | ,000  |
|                              | 502300214            | ,000             | ,000  | ,000  | ,000  |
|                              | 502300411            | ,000             | ,000  | ,000  | ,000  |
|                              | 502300415            | ,000             | ,000  | ,000  | ,000  |
|                              | 502300416            | ,000             | ,000  | ,000  | ,000  |
|                              | 502300811            | ,000             | ,000  | ,000  | ,000  |
|                              | 502300913            | ,000             | ,000  | ,000  | ,000  |
| sv3 tredjedelar för standard | 1 andra tredjedelen  |                  |       |       |       |
|                              | 2 första tredjedelen |                  |       |       |       |
|                              | 3 tredje tredjedelen |                  |       |       |       |

## Categorical Variables Codings

|                              |                      | Parameter coding |       |       |       |
|------------------------------|----------------------|------------------|-------|-------|-------|
|                              |                      | (8)              | (9)   | (10)  | (11)  |
| VASTY2 (SAIR*10000)+VASTY    | 403073101            | ,000             | ,000  | ,000  | ,000  |
|                              | 403073102            | ,000             | ,000  | ,000  | ,000  |
|                              | 403073103            | ,000             | ,000  | ,000  | ,000  |
|                              | 403073202            | ,000             | ,000  | ,000  | ,000  |
|                              | 403073203            | ,000             | ,000  | ,000  | ,000  |
|                              | 403073204            | ,000             | ,000  | ,000  | ,000  |
|                              | 403073303            | ,000             | ,000  | ,000  | ,000  |
|                              | 403073651            | ,000             | ,000  | ,000  | ,000  |
|                              | 403073771            | 1,000            | ,000  | ,000  | ,000  |
|                              | 403133102            | ,000             | 1,000 | ,000  | ,000  |
|                              | 403133106            | ,000             | ,000  | 1,000 | ,000  |
|                              | 403133107            | ,000             | ,000  | ,000  | 1,000 |
|                              | 403133109            | ,000             | ,000  | ,000  | ,000  |
|                              | 403133202            | ,000             | ,000  | ,000  | ,000  |
|                              | 403133203            | ,000             | ,000  | ,000  | ,000  |
|                              | 403133204            | ,000             | ,000  | ,000  | ,000  |
|                              | 403133315            | ,000             | ,000  | ,000  | ,000  |
|                              | 403133322            | ,000             | ,000  | ,000  | ,000  |
|                              | 403133401            | ,000             | ,000  | ,000  | ,000  |
|                              | 403133402            | ,000             | ,000  | ,000  | ,000  |
|                              | 403133550            | ,000             | ,000  | ,000  | ,000  |
|                              | 403133772            | ,000             | ,000  | ,000  | ,000  |
|                              | 403135803            | ,000             | ,000  | ,000  | ,000  |
|                              | 404060001            | ,000             | ,000  | ,000  | ,000  |
|                              | 404060002            | ,000             | ,000  | ,000  | ,000  |
|                              | 404310003            | ,000             | ,000  | ,000  | ,000  |
|                              | 404310004            | ,000             | ,000  | ,000  | ,000  |
|                              | 502300005            | ,000             | ,000  | ,000  | ,000  |
|                              | 502300006            | ,000             | ,000  | ,000  | ,000  |
|                              | 502300007            | ,000             | ,000  | ,000  | ,000  |
|                              | 502300214            | ,000             | ,000  | ,000  | ,000  |
|                              | 502300411            | ,000             | ,000  | ,000  | ,000  |
|                              | 502300415            | ,000             | ,000  | ,000  | ,000  |
|                              | 502300416            | ,000             | ,000  | ,000  | ,000  |
|                              | 502300811            | ,000             | ,000  | ,000  | ,000  |
|                              | 502300913            | ,000             | ,000  | ,000  | ,000  |
| sv3 tredjedelar för standard | 1 andra tredjedelen  |                  |       |       |       |
|                              | 2 första tredjedelen |                  |       |       |       |
|                              | 3 tredje tredjedelen |                  |       |       |       |

## Categorical Variables Codings

|                              |                      | Parameter coding |       |       |       |
|------------------------------|----------------------|------------------|-------|-------|-------|
|                              |                      | (12)             | (13)  | (14)  | (15)  |
| VASTY2 (SAIR*10000)+VASTY    | 403073101            | ,000             | ,000  | ,000  | ,000  |
|                              | 403073102            | ,000             | ,000  | ,000  | ,000  |
|                              | 403073103            | ,000             | ,000  | ,000  | ,000  |
|                              | 403073202            | ,000             | ,000  | ,000  | ,000  |
|                              | 403073203            | ,000             | ,000  | ,000  | ,000  |
|                              | 403073204            | ,000             | ,000  | ,000  | ,000  |
|                              | 403073303            | ,000             | ,000  | ,000  | ,000  |
|                              | 403073651            | ,000             | ,000  | ,000  | ,000  |
|                              | 403073771            | ,000             | ,000  | ,000  | ,000  |
|                              | 403133102            | ,000             | ,000  | ,000  | ,000  |
|                              | 403133106            | ,000             | ,000  | ,000  | ,000  |
|                              | 403133107            | ,000             | ,000  | ,000  | ,000  |
|                              | 403133109            | 1,000            | ,000  | ,000  | ,000  |
|                              | 403133202            | ,000             | 1,000 | ,000  | ,000  |
|                              | 403133203            | ,000             | ,000  | 1,000 | ,000  |
|                              | 403133204            | ,000             | ,000  | ,000  | 1,000 |
|                              | 403133315            | ,000             | ,000  | ,000  | ,000  |
|                              | 403133322            | ,000             | ,000  | ,000  | ,000  |
|                              | 403133401            | ,000             | ,000  | ,000  | ,000  |
|                              | 403133402            | ,000             | ,000  | ,000  | ,000  |
|                              | 403133550            | ,000             | ,000  | ,000  | ,000  |
|                              | 403133772            | ,000             | ,000  | ,000  | ,000  |
|                              | 403135803            | ,000             | ,000  | ,000  | ,000  |
|                              | 404060001            | ,000             | ,000  | ,000  | ,000  |
|                              | 404060002            | ,000             | ,000  | ,000  | ,000  |
|                              | 404310003            | ,000             | ,000  | ,000  | ,000  |
|                              | 404310004            | ,000             | ,000  | ,000  | ,000  |
|                              | 502300005            | ,000             | ,000  | ,000  | ,000  |
|                              | 502300006            | ,000             | ,000  | ,000  | ,000  |
|                              | 502300007            | ,000             | ,000  | ,000  | ,000  |
|                              | 502300214            | ,000             | ,000  | ,000  | ,000  |
|                              | 502300411            | ,000             | ,000  | ,000  | ,000  |
|                              | 502300415            | ,000             | ,000  | ,000  | ,000  |
|                              | 502300416            | ,000             | ,000  | ,000  | ,000  |
|                              | 502300811            | ,000             | ,000  | ,000  | ,000  |
|                              | 502300913            | ,000             | ,000  | ,000  | ,000  |
| sv3 tredjedelar för standard | 1 andra tredjedelen  |                  |       |       |       |
|                              | 2 första tredjedelen |                  |       |       |       |
|                              | 3 tredje tredjedelen |                  |       |       |       |

## Categorical Variables Codings

|                              |                      | Parameter coding |       |       |       |
|------------------------------|----------------------|------------------|-------|-------|-------|
|                              |                      | (16)             | (17)  | (18)  | (19)  |
| VASTY2 (SAIR*10000)+VASTY    | 403073101            | ,000             | ,000  | ,000  | ,000  |
|                              | 403073102            | ,000             | ,000  | ,000  | ,000  |
|                              | 403073103            | ,000             | ,000  | ,000  | ,000  |
|                              | 403073202            | ,000             | ,000  | ,000  | ,000  |
|                              | 403073203            | ,000             | ,000  | ,000  | ,000  |
|                              | 403073204            | ,000             | ,000  | ,000  | ,000  |
|                              | 403073303            | ,000             | ,000  | ,000  | ,000  |
|                              | 403073651            | ,000             | ,000  | ,000  | ,000  |
|                              | 403073771            | ,000             | ,000  | ,000  | ,000  |
|                              | 403133102            | ,000             | ,000  | ,000  | ,000  |
|                              | 403133106            | ,000             | ,000  | ,000  | ,000  |
|                              | 403133107            | ,000             | ,000  | ,000  | ,000  |
|                              | 403133109            | ,000             | ,000  | ,000  | ,000  |
|                              | 403133202            | ,000             | ,000  | ,000  | ,000  |
|                              | 403133203            | ,000             | ,000  | ,000  | ,000  |
|                              | 403133204            | ,000             | ,000  | ,000  | ,000  |
|                              | 403133315            | 1,000            | ,000  | ,000  | ,000  |
|                              | 403133322            | ,000             | 1,000 | ,000  | ,000  |
|                              | 403133401            | ,000             | ,000  | 1,000 | ,000  |
|                              | 403133402            | ,000             | ,000  | ,000  | 1,000 |
|                              | 403133550            | ,000             | ,000  | ,000  | ,000  |
|                              | 403133772            | ,000             | ,000  | ,000  | ,000  |
|                              | 403135803            | ,000             | ,000  | ,000  | ,000  |
|                              | 404060001            | ,000             | ,000  | ,000  | ,000  |
|                              | 404060002            | ,000             | ,000  | ,000  | ,000  |
|                              | 404310003            | ,000             | ,000  | ,000  | ,000  |
|                              | 404310004            | ,000             | ,000  | ,000  | ,000  |
|                              | 502300005            | ,000             | ,000  | ,000  | ,000  |
|                              | 502300006            | ,000             | ,000  | ,000  | ,000  |
|                              | 502300007            | ,000             | ,000  | ,000  | ,000  |
|                              | 502300214            | ,000             | ,000  | ,000  | ,000  |
|                              | 502300411            | ,000             | ,000  | ,000  | ,000  |
|                              | 502300415            | ,000             | ,000  | ,000  | ,000  |
|                              | 502300416            | ,000             | ,000  | ,000  | ,000  |
|                              | 502300811            | ,000             | ,000  | ,000  | ,000  |
|                              | 502300913            | ,000             | ,000  | ,000  | ,000  |
| sv3 tredjedelar för standard | 1 andra tredjedelen  |                  |       |       |       |
|                              | 2 första tredjedelen |                  |       |       |       |
|                              | 3 tredje tredjedelen |                  |       |       |       |

## Categorical Variables Codings

|                              |                      | Parameter coding |       |       |       |
|------------------------------|----------------------|------------------|-------|-------|-------|
|                              |                      | (20)             | (21)  | (22)  | (23)  |
| VASTY2 (SAIR*10000)+VASTY    | 403073101            | ,000             | ,000  | ,000  | ,000  |
|                              | 403073102            | ,000             | ,000  | ,000  | ,000  |
|                              | 403073103            | ,000             | ,000  | ,000  | ,000  |
|                              | 403073202            | ,000             | ,000  | ,000  | ,000  |
|                              | 403073203            | ,000             | ,000  | ,000  | ,000  |
|                              | 403073204            | ,000             | ,000  | ,000  | ,000  |
|                              | 403073303            | ,000             | ,000  | ,000  | ,000  |
|                              | 403073651            | ,000             | ,000  | ,000  | ,000  |
|                              | 403073771            | ,000             | ,000  | ,000  | ,000  |
|                              | 403133102            | ,000             | ,000  | ,000  | ,000  |
|                              | 403133106            | ,000             | ,000  | ,000  | ,000  |
|                              | 403133107            | ,000             | ,000  | ,000  | ,000  |
|                              | 403133109            | ,000             | ,000  | ,000  | ,000  |
|                              | 403133202            | ,000             | ,000  | ,000  | ,000  |
|                              | 403133203            | ,000             | ,000  | ,000  | ,000  |
|                              | 403133204            | ,000             | ,000  | ,000  | ,000  |
|                              | 403133315            | ,000             | ,000  | ,000  | ,000  |
|                              | 403133322            | ,000             | ,000  | ,000  | ,000  |
|                              | 403133401            | ,000             | ,000  | ,000  | ,000  |
|                              | 403133402            | ,000             | ,000  | ,000  | ,000  |
|                              | 403133550            | 1,000            | ,000  | ,000  | ,000  |
|                              | 403133772            | ,000             | 1,000 | ,000  | ,000  |
|                              | 403135803            | ,000             | ,000  | 1,000 | ,000  |
|                              | 404060001            | ,000             | ,000  | ,000  | 1,000 |
|                              | 404060002            | ,000             | ,000  | ,000  | ,000  |
|                              | 404310003            | ,000             | ,000  | ,000  | ,000  |
|                              | 404310004            | ,000             | ,000  | ,000  | ,000  |
|                              | 502300005            | ,000             | ,000  | ,000  | ,000  |
|                              | 502300006            | ,000             | ,000  | ,000  | ,000  |
|                              | 502300007            | ,000             | ,000  | ,000  | ,000  |
|                              | 502300214            | ,000             | ,000  | ,000  | ,000  |
|                              | 502300411            | ,000             | ,000  | ,000  | ,000  |
|                              | 502300415            | ,000             | ,000  | ,000  | ,000  |
|                              | 502300416            | ,000             | ,000  | ,000  | ,000  |
|                              | 502300811            | ,000             | ,000  | ,000  | ,000  |
|                              | 502300913            | ,000             | ,000  | ,000  | ,000  |
| sv3 tredjedelar för standard | 1 andra tredjedelen  |                  |       |       |       |
|                              | 2 första tredjedelen |                  |       |       |       |
|                              | 3 tredje tredjedelen |                  |       |       |       |

## Categorical Variables Codings

|                              |                      | Parameter coding |       |       |       |
|------------------------------|----------------------|------------------|-------|-------|-------|
|                              |                      | (24)             | (25)  | (26)  | (27)  |
| VASTY2 (SAIR*10000)+VASTY    | 403073101            | ,000             | ,000  | ,000  | ,000  |
|                              | 403073102            | ,000             | ,000  | ,000  | ,000  |
|                              | 403073103            | ,000             | ,000  | ,000  | ,000  |
|                              | 403073202            | ,000             | ,000  | ,000  | ,000  |
|                              | 403073203            | ,000             | ,000  | ,000  | ,000  |
|                              | 403073204            | ,000             | ,000  | ,000  | ,000  |
|                              | 403073303            | ,000             | ,000  | ,000  | ,000  |
|                              | 403073651            | ,000             | ,000  | ,000  | ,000  |
|                              | 403073771            | ,000             | ,000  | ,000  | ,000  |
|                              | 403133102            | ,000             | ,000  | ,000  | ,000  |
|                              | 403133106            | ,000             | ,000  | ,000  | ,000  |
|                              | 403133107            | ,000             | ,000  | ,000  | ,000  |
|                              | 403133109            | ,000             | ,000  | ,000  | ,000  |
|                              | 403133202            | ,000             | ,000  | ,000  | ,000  |
|                              | 403133203            | ,000             | ,000  | ,000  | ,000  |
|                              | 403133204            | ,000             | ,000  | ,000  | ,000  |
|                              | 403133315            | ,000             | ,000  | ,000  | ,000  |
|                              | 403133322            | ,000             | ,000  | ,000  | ,000  |
|                              | 403133401            | ,000             | ,000  | ,000  | ,000  |
|                              | 403133402            | ,000             | ,000  | ,000  | ,000  |
|                              | 403133550            | ,000             | ,000  | ,000  | ,000  |
|                              | 403133772            | ,000             | ,000  | ,000  | ,000  |
|                              | 403135803            | ,000             | ,000  | ,000  | ,000  |
|                              | 404060001            | ,000             | ,000  | ,000  | ,000  |
|                              | 404060002            | 1,000            | ,000  | ,000  | ,000  |
|                              | 404310003            | ,000             | 1,000 | ,000  | ,000  |
|                              | 404310004            | ,000             | ,000  | 1,000 | ,000  |
|                              | 502300005            | ,000             | ,000  | ,000  | 1,000 |
|                              | 502300006            | ,000             | ,000  | ,000  | ,000  |
|                              | 502300007            | ,000             | ,000  | ,000  | ,000  |
|                              | 502300214            | ,000             | ,000  | ,000  | ,000  |
|                              | 502300411            | ,000             | ,000  | ,000  | ,000  |
|                              | 502300415            | ,000             | ,000  | ,000  | ,000  |
|                              | 502300416            | ,000             | ,000  | ,000  | ,000  |
|                              | 502300811            | ,000             | ,000  | ,000  | ,000  |
|                              | 502300913            | ,000             | ,000  | ,000  | ,000  |
| sv3 tredjedelar för standard | 1 andra tredjedelen  |                  |       |       |       |
|                              | 2 första tredjedelen |                  |       |       |       |
|                              | 3 tredje tredjedelen |                  |       |       |       |

## Categorical Variables Codings

|                              |                      | Parameter coding |       |       |       |
|------------------------------|----------------------|------------------|-------|-------|-------|
|                              |                      | (28)             | (29)  | (30)  | (31)  |
| VASTY2 (SAIR*10000)+VASTY    | 403073101            | ,000             | ,000  | ,000  | ,000  |
|                              | 403073102            | ,000             | ,000  | ,000  | ,000  |
|                              | 403073103            | ,000             | ,000  | ,000  | ,000  |
|                              | 403073202            | ,000             | ,000  | ,000  | ,000  |
|                              | 403073203            | ,000             | ,000  | ,000  | ,000  |
|                              | 403073204            | ,000             | ,000  | ,000  | ,000  |
|                              | 403073303            | ,000             | ,000  | ,000  | ,000  |
|                              | 403073651            | ,000             | ,000  | ,000  | ,000  |
|                              | 403073771            | ,000             | ,000  | ,000  | ,000  |
|                              | 403133102            | ,000             | ,000  | ,000  | ,000  |
|                              | 403133106            | ,000             | ,000  | ,000  | ,000  |
|                              | 403133107            | ,000             | ,000  | ,000  | ,000  |
|                              | 403133109            | ,000             | ,000  | ,000  | ,000  |
|                              | 403133202            | ,000             | ,000  | ,000  | ,000  |
|                              | 403133203            | ,000             | ,000  | ,000  | ,000  |
|                              | 403133204            | ,000             | ,000  | ,000  | ,000  |
|                              | 403133315            | ,000             | ,000  | ,000  | ,000  |
|                              | 403133322            | ,000             | ,000  | ,000  | ,000  |
|                              | 403133401            | ,000             | ,000  | ,000  | ,000  |
|                              | 403133402            | ,000             | ,000  | ,000  | ,000  |
|                              | 403133550            | ,000             | ,000  | ,000  | ,000  |
|                              | 403133772            | ,000             | ,000  | ,000  | ,000  |
|                              | 403135803            | ,000             | ,000  | ,000  | ,000  |
|                              | 404060001            | ,000             | ,000  | ,000  | ,000  |
|                              | 404060002            | ,000             | ,000  | ,000  | ,000  |
|                              | 404310003            | ,000             | ,000  | ,000  | ,000  |
|                              | 404310004            | ,000             | ,000  | ,000  | ,000  |
|                              | 502300005            | ,000             | ,000  | ,000  | ,000  |
|                              | 502300006            | 1,000            | ,000  | ,000  | ,000  |
|                              | 502300007            | ,000             | 1,000 | ,000  | ,000  |
|                              | 502300214            | ,000             | ,000  | 1,000 | ,000  |
|                              | 502300411            | ,000             | ,000  | ,000  | 1,000 |
|                              | 502300415            | ,000             | ,000  | ,000  | ,000  |
|                              | 502300416            | ,000             | ,000  | ,000  | ,000  |
|                              | 502300811            | ,000             | ,000  | ,000  | ,000  |
|                              | 502300913            | ,000             | ,000  | ,000  | ,000  |
| sv3 tredjedelar för standard | 1 andra tredjedelen  |                  |       |       |       |
|                              | 2 första tredjedelen |                  |       |       |       |
|                              | 3 tredje tredjedelen |                  |       |       |       |



**Categorical Variables Codings**

|                              |                      | Parameter coding |       |       |       |
|------------------------------|----------------------|------------------|-------|-------|-------|
|                              |                      | (32)             | (33)  | (34)  | (35)  |
| VASTY2 (SAIR*10000)+VASTY    | 403073101            | ,000             | ,000  | ,000  | ,000  |
|                              | 403073102            | ,000             | ,000  | ,000  | ,000  |
|                              | 403073103            | ,000             | ,000  | ,000  | ,000  |
|                              | 403073202            | ,000             | ,000  | ,000  | ,000  |
|                              | 403073203            | ,000             | ,000  | ,000  | ,000  |
|                              | 403073204            | ,000             | ,000  | ,000  | ,000  |
|                              | 403073303            | ,000             | ,000  | ,000  | ,000  |
|                              | 403073651            | ,000             | ,000  | ,000  | ,000  |
|                              | 403073771            | ,000             | ,000  | ,000  | ,000  |
|                              | 403133102            | ,000             | ,000  | ,000  | ,000  |
|                              | 403133106            | ,000             | ,000  | ,000  | ,000  |
|                              | 403133107            | ,000             | ,000  | ,000  | ,000  |
|                              | 403133109            | ,000             | ,000  | ,000  | ,000  |
|                              | 403133202            | ,000             | ,000  | ,000  | ,000  |
|                              | 403133203            | ,000             | ,000  | ,000  | ,000  |
|                              | 403133204            | ,000             | ,000  | ,000  | ,000  |
|                              | 403133315            | ,000             | ,000  | ,000  | ,000  |
|                              | 403133322            | ,000             | ,000  | ,000  | ,000  |
|                              | 403133401            | ,000             | ,000  | ,000  | ,000  |
|                              | 403133402            | ,000             | ,000  | ,000  | ,000  |
|                              | 403133550            | ,000             | ,000  | ,000  | ,000  |
|                              | 403133772            | ,000             | ,000  | ,000  | ,000  |
|                              | 403135803            | ,000             | ,000  | ,000  | ,000  |
|                              | 404060001            | ,000             | ,000  | ,000  | ,000  |
|                              | 404060002            | ,000             | ,000  | ,000  | ,000  |
|                              | 404310003            | ,000             | ,000  | ,000  | ,000  |
|                              | 404310004            | ,000             | ,000  | ,000  | ,000  |
|                              | 502300005            | ,000             | ,000  | ,000  | ,000  |
|                              | 502300006            | ,000             | ,000  | ,000  | ,000  |
|                              | 502300007            | ,000             | ,000  | ,000  | ,000  |
|                              | 502300214            | ,000             | ,000  | ,000  | ,000  |
|                              | 502300411            | ,000             | ,000  | ,000  | ,000  |
|                              | 502300415            | 1,000            | ,000  | ,000  | ,000  |
|                              | 502300416            | ,000             | 1,000 | ,000  | ,000  |
|                              | 502300811            | ,000             | ,000  | 1,000 | ,000  |
|                              | 502300913            | ,000             | ,000  | ,000  | 1,000 |
| sv3 tredjedelar för standard | 1 andra tredjedelen  |                  |       |       |       |
|                              | 2 första tredjedelen |                  |       |       |       |
|                              | 3 tredje tredjedelen |                  |       |       |       |

**Block 0: Beginning Block**

Classification Table<sup>a,b</sup>

| Observed           |                                                |                                                              |
|--------------------|------------------------------------------------|--------------------------------------------------------------|
| Step 0             | luonnelt1 luonne highest = tapahtui potilaalle | 0 ingen händelse eller läheltä piti<br>1 tapahtui potilaalle |
| Overall Percentage |                                                |                                                              |

Classification Table<sup>a,b</sup>

| Observed           |                                                | Predicted                                                    |              |
|--------------------|------------------------------------------------|--------------------------------------------------------------|--------------|
|                    |                                                | luonnelt1 luonne highest = ...                               |              |
|                    |                                                | 0 ingen händelse eller läheltä piti                          |              |
| Step 0             | luonnelt1 luonne highest = tapahtui potilaalle | 0 ingen händelse eller läheltä piti<br>1 tapahtui potilaalle | 11627<br>848 |
| Overall Percentage |                                                |                                                              |              |

Classification Table<sup>a,b</sup>

| Observed           |                                                | Predicted                                                    |        |
|--------------------|------------------------------------------------|--------------------------------------------------------------|--------|
|                    |                                                | luonnelt1 luonne highest ...                                 |        |
|                    |                                                | 1 tapahtui potilaalle                                        |        |
| Step 0             | luonnelt1 luonne highest = tapahtui potilaalle | 0 ingen händelse eller läheltä piti<br>1 tapahtui potilaalle | 0<br>0 |
| Overall Percentage |                                                |                                                              |        |

Classification Table<sup>a,b</sup>

| Observed           |                                                | Predicted                                                    |             |
|--------------------|------------------------------------------------|--------------------------------------------------------------|-------------|
|                    |                                                | Percentage Correct                                           |             |
| Step 0             | luonnelt1 luonne highest = tapahtui potilaalle | 0 ingen händelse eller läheltä piti<br>1 tapahtui potilaalle | 100,0<br>,0 |
| Overall Percentage |                                                | 93,2                                                         |             |

a. Constant is included in the model.

b. The cut value is ,500

## Variables in the Equation

|                 | B      | S.E. | Wald     | df | Sig. | Exp(B) |
|-----------------|--------|------|----------|----|------|--------|
| Step 0 Constant | -2,618 | ,036 | 5417,889 | 1  | ,000 | ,073   |

## Variables not in the Equation

|                      | Score   | df | Sig. |
|----------------------|---------|----|------|
| Step 0 Variables sv3 | 16,006  | 2  | ,000 |
| sv3(1)               | 12,247  | 1  | ,000 |
| sv3(2)               | 13,246  | 1  | ,000 |
| VASTY2               | 299,491 | 35 | ,000 |
| VASTY2(1)            | ,007    | 1  | ,934 |
| VASTY2(2)            | 8,968   | 1  | ,003 |
| VASTY2(3)            | 15,764  | 1  | ,000 |
| VASTY2(4)            | ,453    | 1  | ,501 |
| VASTY2(5)            | ,965    | 1  | ,326 |
| VASTY2(6)            | 14,062  | 1  | ,000 |
| VASTY2(7)            | 12,067  | 1  | ,001 |
| VASTY2(8)            | 1,504   | 1  | ,220 |
| VASTY2(9)            | 1,612   | 1  | ,204 |
| VASTY2(10)           | 55,161  | 1  | ,000 |
| VASTY2(11)           | 11,675  | 1  | ,001 |
| VASTY2(12)           | ,213    | 1  | ,644 |
| VASTY2(13)           | 55,161  | 1  | ,000 |
| VASTY2(14)           | 1,504   | 1  | ,220 |
| VASTY2(15)           | 1,199   | 1  | ,273 |
| VASTY2(16)           | 3,222   | 1  | ,073 |
| VASTY2(17)           | 12,590  | 1  | ,000 |
| VASTY2(18)           | 7,137   | 1  | ,008 |
| VASTY2(19)           | 19,294  | 1  | ,000 |
| VASTY2(20)           | ,030    | 1  | ,863 |
| VASTY2(21)           | ,647    | 1  | ,421 |
| VASTY2(22)           | ,782    | 1  | ,377 |
| VASTY2(23)           | 1,199   | 1  | ,273 |
| VASTY2(24)           | 2,253   | 1  | ,133 |
| VASTY2(25)           | 1,513   | 1  | ,219 |
| VASTY2(26)           | 7,708   | 1  | ,005 |
| VASTY2(27)           | 15,836  | 1  | ,000 |
| VASTY2(28)           | 6,172   | 1  | ,013 |
| VASTY2(29)           | 11,203  | 1  | ,001 |
| VASTY2(30)           | 1,058   | 1  | ,304 |
| VASTY2(31)           | 6,527   | 1  | ,011 |
| VASTY2(32)           | ,544    | 1  | ,461 |
| VASTY2(33)           | ,126    | 1  | ,723 |
| VASTY2(34)           | 14,062  | 1  | ,000 |
| VASTY2(35)           | 15,901  | 1  | ,000 |

## Variables not in the Equation

|                    | Score   | df | Sig. |
|--------------------|---------|----|------|
| Overall Statistics | 303,614 | 37 | ,000 |

## Block 1: Method = Enter

## Omnibus Tests of Model Coefficients

|             | Chi-square | df | Sig. |
|-------------|------------|----|------|
| Step 1 Step | 311,201    | 37 | ,000 |
| Block       | 311,201    | 37 | ,000 |
| Model       | 311,201    | 37 | ,000 |

## Model Summary

| Step | -2 Log likelihood     | Cox & Snell R Square | Nagelkerke R Square |
|------|-----------------------|----------------------|---------------------|
| 1    | 5885,671 <sup>a</sup> | ,025                 | ,063                |

a. Estimation terminated at iteration number 7 because parameter estimates changed by less than ,001.

Classification Table<sup>a</sup>

| Observed           |                                                | Predicted                           |                       |
|--------------------|------------------------------------------------|-------------------------------------|-----------------------|
| Step 1             | luonnelt1 luonne highest = tapahtui potilaalle | 0 ingen händelse eller läheltä piti | 1 tapahtui potilaalle |
| Overall Percentage |                                                |                                     |                       |

Classification Table<sup>a</sup>

| Observed           |                                                | Predicted                           |       |
|--------------------|------------------------------------------------|-------------------------------------|-------|
| Step 1             | luonnelt1 luonne highest = tapahtui potilaalle | 0 ingen händelse eller läheltä piti | 11627 |
|                    |                                                | 1 tapahtui potilaalle               | 848   |
| Overall Percentage |                                                |                                     |       |

Classification Table<sup>a</sup>

| Observed           |                                                | Predicted                           |                          |
|--------------------|------------------------------------------------|-------------------------------------|--------------------------|
|                    |                                                | luonnelt1<br>luonne highest ...     | 1 tapahtui<br>potilaalle |
| Step 1             | luonnelt1 luonne highest = tapahtui potilaalle | 0 ingen händelse eller läheltä piti | 0                        |
|                    |                                                | 1 tapahtui potilaalle               | 0                        |
| Overall Percentage |                                                |                                     |                          |

Classification Table<sup>a</sup>

| Observed           |                                                | Predicted                           |       |
|--------------------|------------------------------------------------|-------------------------------------|-------|
|                    |                                                | Percentage<br>Correct               |       |
| Step 1             | luonnelt1 luonne highest = tapahtui potilaalle | 0 ingen händelse eller läheltä piti | 100,0 |
|                    |                                                | 1 tapahtui potilaalle               | ,0    |
| Overall Percentage |                                                |                                     | 93,2  |

a. The cut value is ,500

## Variables in the Equation

|                         | B      | S.E. | Wald    | df | Sig. | Exp(B) |
|-------------------------|--------|------|---------|----|------|--------|
| Step 1 <sup>a</sup> sv3 |        |      | 3,981   | 2  | ,137 |        |
| sv3(1)                  | -,060  | ,106 | ,325    | 1  | ,569 | ,941   |
| sv3(2)                  | ,154   | ,103 | 2,238   | 1  | ,135 | 1,166  |
| VASTY2                  |        |      | 231,303 | 35 | ,000 |        |
| VASTY2(1)               | ,058   | ,300 | ,038    | 1  | ,846 | 1,060  |
| VASTY2(2)               | ,488   | ,278 | 3,079   | 1  | ,079 | 1,628  |
| VASTY2(3)               | -1,367 | ,465 | 8,655   | 1  | ,003 | ,255   |
| VASTY2(4)               | ,225   | ,292 | ,596    | 1  | ,440 | 1,253  |
| VASTY2(5)               | -,101  | ,326 | ,095    | 1  | ,758 | ,904   |
| VASTY2(6)               | -1,344 | ,442 | 9,235   | 1  | ,002 | ,261   |
| VASTY2(7)               | ,662   | ,272 | 5,921   | 1  | ,015 | 1,939  |
| VASTY2(8)               | -,160  | ,320 | ,250    | 1  | ,617 | ,852   |
| VASTY2(9)               | ,321   | ,290 | 1,228   | 1  | ,268 | 1,379  |
| VASTY2(10)              | ,968   | ,263 | 13,515  | 1  | ,000 | 2,632  |
| VASTY2(11)              | ,634   | ,272 | 5,443   | 1  | ,020 | 1,886  |
| VASTY2(12)              | ,087   | ,297 | ,086    | 1  | ,769 | 1,091  |
| VASTY2(13)              | ,962   | ,264 | 13,267  | 1  | ,000 | 2,616  |
| VASTY2(14)              | -,266  | ,321 | ,687    | 1  | ,407 | ,766   |
| VASTY2(15)              | ,196   | ,292 | ,452    | 1  | ,501 | 1,217  |
| VASTY2(16)              | ,501   | ,330 | 2,305   | 1  | ,129 | 1,650  |
| VASTY2(17)              | -1,075 | ,418 | 6,615   | 1  | ,010 | ,341   |
| VASTY2(18)              | -,590  | ,371 | 2,526   | 1  | ,112 | ,555   |
| VASTY2(19)              | -1,719 | ,552 | 9,710   | 1  | ,002 | ,179   |
| VASTY2(20)              | ,061   | ,314 | ,037    | 1  | ,847 | 1,063  |
| VASTY2(21)              | -,067  | ,312 | ,046    | 1  | ,829 | ,935   |
| VASTY2(22)              | ,247   | ,290 | ,729    | 1  | ,393 | 1,281  |
| VASTY2(23)              | ,303   | ,288 | 1,104   | 1  | ,293 | 1,353  |
| VASTY2(24)              | ,316   | ,285 | 1,230   | 1  | ,267 | 1,371  |
| VASTY2(25)              | ,377   | ,301 | 1,567   | 1  | ,211 | 1,458  |
| VASTY2(26)              | -,881  | ,418 | 4,429   | 1  | ,035 | ,415   |
| VASTY2(27)              | -1,469 | ,466 | 9,917   | 1  | ,002 | ,230   |
| VASTY2(28)              | -1,024 | ,471 | 4,721   | 1  | ,030 | ,359   |
| VASTY2(29)              | -1,110 | ,406 | 7,480   | 1  | ,006 | ,329   |
| VASTY2(30)              | -,112  | ,316 | ,126    | 1  | ,723 | ,894   |
| VASTY2(31)              | ,591   | ,283 | 4,348   | 1  | ,037 | 1,806  |
| VASTY2(32)              | ,002   | ,319 | ,000    | 1  | ,994 | 1,002  |
| VASTY2(33)              | ,090   | ,313 | ,083    | 1  | ,773 | 1,095  |
| VASTY2(34)              | -1,232 | ,438 | 7,897   | 1  | ,005 | ,292   |
| VASTY2(35)              | ,722   | ,276 | 6,854   | 1  | ,009 | 2,059  |
| Constant                | -2,724 | ,221 | 152,364 | 1  | ,000 | ,066   |

## Variables in the Equation

|                     |            | 95% C.I. for EXP(B) |       |
|---------------------|------------|---------------------|-------|
|                     |            | Lower               | Upper |
| Step 1 <sup>a</sup> | sv3        |                     |       |
|                     | sv3(1)     | ,765                | 1,158 |
|                     | sv3(2)     | ,953                | 1,427 |
|                     | VASTY2     |                     |       |
|                     | VASTY2(1)  | ,589                | 1,908 |
|                     | VASTY2(2)  | ,945                | 2,807 |
|                     | VASTY2(3)  | ,102                | ,634  |
|                     | VASTY2(4)  | ,707                | 2,221 |
|                     | VASTY2(5)  | ,477                | 1,714 |
|                     | VASTY2(6)  | ,110                | ,621  |
|                     | VASTY2(7)  | 1,138               | 3,306 |
|                     | VASTY2(8)  | ,455                | 1,596 |
|                     | VASTY2(9)  | ,781                | 2,435 |
|                     | VASTY2(10) | 1,571               | 4,410 |
|                     | VASTY2(11) | 1,107               | 3,214 |
|                     | VASTY2(12) | ,609                | 1,954 |
|                     | VASTY2(13) | 1,559               | 4,388 |
|                     | VASTY2(14) | ,408                | 1,438 |
|                     | VASTY2(15) | ,687                | 2,154 |
|                     | VASTY2(16) | ,864                | 3,151 |
|                     | VASTY2(17) | ,150                | ,774  |
|                     | VASTY2(18) | ,268                | 1,147 |
|                     | VASTY2(19) | ,061                | ,529  |
|                     | VASTY2(20) | ,574                | 1,967 |
|                     | VASTY2(21) | ,507                | 1,723 |
|                     | VASTY2(22) | ,726                | 2,259 |
|                     | VASTY2(23) | ,770                | 2,379 |
|                     | VASTY2(24) | ,785                | 2,396 |
|                     | VASTY2(25) | ,808                | 2,632 |
|                     | VASTY2(26) | ,183                | ,941  |
|                     | VASTY2(27) | ,092                | ,574  |
|                     | VASTY2(28) | ,143                | ,905  |
|                     | VASTY2(29) | ,149                | ,730  |
|                     | VASTY2(30) | ,481                | 1,661 |
|                     | VASTY2(31) | 1,036               | 3,147 |
|                     | VASTY2(32) | ,536                | 1,875 |
|                     | VASTY2(33) | ,593                | 2,021 |
|                     | VASTY2(34) | ,124                | ,689  |
|                     | VASTY2(35) | 1,199               | 3,536 |
|                     | Constant   |                     |       |

a. Variable(s) entered on step 1: sv3, VASTY2.

```

1
2
3 LOGISTIC REGRESSION VARIABLES luonnelt1
4   /METHOD=ENTER sv5 VASTY2
5   /CONTRAST (sv5)=Indicator(1)
6   /CONTRAST (VASTY2)=Indicator(1)
7   /PRINT=CI(95)
8   /CRITERIA=PIN(0.05) POUT(0.10) ITERATE(20) CUT(0.5).
9
10
11

```

## Logistic Regression

[DataSet6] C:\cWordjan\Rafaela\_VCS\alla\_tillsammans\abo\_bjo\_vasa\_v1.sav

### Case Processing Summary

| Unweighted Cases <sup>a</sup> |                      | N     | Percent |
|-------------------------------|----------------------|-------|---------|
| Selected Cases                | Included in Analysis | 12475 | 100,0   |
|                               | Missing Cases        | 0     | ,0      |
|                               | Total                | 12475 | 100,0   |
| Unselected Cases              |                      | 0     | ,0      |
| Total                         |                      | 12475 | 100,0   |

a. If weight is in effect, see classification table for the total number of cases.

### Dependent Variable Encoding

| Original Value                      | Internal Value |
|-------------------------------------|----------------|
| 0 ingen händelse eller läheltä piti | 0              |
| 1 tapahtui potilaalle               | 1              |



## Categorical Variables Codings

|                                               | Frequency | Parameter coding |       |       |
|-----------------------------------------------|-----------|------------------|-------|-------|
|                                               |           | (1)              | (2)   | (3)   |
| VASTY2 (SAIR*10000)+VASTY 403073101           | 365       | ,000             | ,000  | ,000  |
| 403073102                                     | 362       | 1,000            | ,000  | ,000  |
| 403073103                                     | 365       | ,000             | 1,000 | ,000  |
| 403073202                                     | 365       | ,000             | ,000  | 1,000 |
| 403073203                                     | 365       | ,000             | ,000  | ,000  |
| 403073204                                     | 330       | ,000             | ,000  | ,000  |
| 403073303                                     | 364       | ,000             | ,000  | ,000  |
| 403073651                                     | 362       | ,000             | ,000  | ,000  |
| 403073771                                     | 365       | ,000             | ,000  | ,000  |
| 403133102                                     | 341       | ,000             | ,000  | ,000  |
| 403133106                                     | 365       | ,000             | ,000  | ,000  |
| 403133107                                     | 365       | ,000             | ,000  | ,000  |
| 403133109                                     | 365       | ,000             | ,000  | ,000  |
| 403133202                                     | 365       | ,000             | ,000  | ,000  |
| 403133203                                     | 365       | ,000             | ,000  | ,000  |
| 403133204                                     | 365       | ,000             | ,000  | ,000  |
| 403133315                                     | 177       | ,000             | ,000  | ,000  |
| 403133322                                     | 365       | ,000             | ,000  | ,000  |
| 403133401                                     | 362       | ,000             | ,000  | ,000  |
| 403133402                                     | 365       | ,000             | ,000  | ,000  |
| 403133550                                     | 298       | ,000             | ,000  | ,000  |
| 403133772                                     | 365       | ,000             | ,000  | ,000  |
| 403135803                                     | 365       | ,000             | ,000  | ,000  |
| 404060001                                     | 365       | ,000             | ,000  | ,000  |
| 404060002                                     | 366       | ,000             | ,000  | ,000  |
| 404310003                                     | 291       | ,000             | ,000  | ,000  |
| 404310004                                     | 291       | ,000             | ,000  | ,000  |
| 502300005                                     | 366       | ,000             | ,000  | ,000  |
| 502300006                                     | 225       | ,000             | ,000  | ,000  |
| 502300007                                     | 366       | ,000             | ,000  | ,000  |
| 502300214                                     | 366       | ,000             | ,000  | ,000  |
| 502300411                                     | 366       | ,000             | ,000  | ,000  |
| 502300415                                     | 360       | ,000             | ,000  | ,000  |
| 502300416                                     | 363       | ,000             | ,000  | ,000  |
| 502300811                                     | 364       | ,000             | ,000  | ,000  |
| 502300913                                     | 315       | ,000             | ,000  | ,000  |
| sv5 kvintiler för standard 1 tredje kvintilen | 1863      | ,000             | ,000  | ,000  |
| 2 första kvintilen                            | 3570      | 1,000            | ,000  | ,000  |
| 3 andra kvintilen                             | 1759      | ,000             | 1,000 | ,000  |
| 4 fjärde kvintilen                            | 2327      | ,000             | ,000  | 1,000 |
| 5 femte kvintilen                             | 2956      | ,000             | ,000  | ,000  |

## Categorical Variables Codings

|                            |                    | Parameter coding |       |       |       |
|----------------------------|--------------------|------------------|-------|-------|-------|
|                            |                    | (4)              | (5)   | (6)   | (7)   |
| VASTY2 (SAIR*10000)+VASTY  | 403073101          | ,000             | ,000  | ,000  | ,000  |
|                            | 403073102          | ,000             | ,000  | ,000  | ,000  |
|                            | 403073103          | ,000             | ,000  | ,000  | ,000  |
|                            | 403073202          | ,000             | ,000  | ,000  | ,000  |
|                            | 403073203          | 1,000            | ,000  | ,000  | ,000  |
|                            | 403073204          | ,000             | 1,000 | ,000  | ,000  |
|                            | 403073303          | ,000             | ,000  | 1,000 | ,000  |
|                            | 403073651          | ,000             | ,000  | ,000  | 1,000 |
|                            | 403073771          | ,000             | ,000  | ,000  | ,000  |
|                            | 403133102          | ,000             | ,000  | ,000  | ,000  |
|                            | 403133106          | ,000             | ,000  | ,000  | ,000  |
|                            | 403133107          | ,000             | ,000  | ,000  | ,000  |
|                            | 403133109          | ,000             | ,000  | ,000  | ,000  |
|                            | 403133202          | ,000             | ,000  | ,000  | ,000  |
|                            | 403133203          | ,000             | ,000  | ,000  | ,000  |
|                            | 403133204          | ,000             | ,000  | ,000  | ,000  |
|                            | 403133315          | ,000             | ,000  | ,000  | ,000  |
|                            | 403133322          | ,000             | ,000  | ,000  | ,000  |
|                            | 403133401          | ,000             | ,000  | ,000  | ,000  |
|                            | 403133402          | ,000             | ,000  | ,000  | ,000  |
|                            | 403133550          | ,000             | ,000  | ,000  | ,000  |
|                            | 403133772          | ,000             | ,000  | ,000  | ,000  |
|                            | 403135803          | ,000             | ,000  | ,000  | ,000  |
|                            | 404060001          | ,000             | ,000  | ,000  | ,000  |
|                            | 404060002          | ,000             | ,000  | ,000  | ,000  |
|                            | 404310003          | ,000             | ,000  | ,000  | ,000  |
|                            | 404310004          | ,000             | ,000  | ,000  | ,000  |
|                            | 502300005          | ,000             | ,000  | ,000  | ,000  |
|                            | 502300006          | ,000             | ,000  | ,000  | ,000  |
|                            | 502300007          | ,000             | ,000  | ,000  | ,000  |
|                            | 502300214          | ,000             | ,000  | ,000  | ,000  |
|                            | 502300411          | ,000             | ,000  | ,000  | ,000  |
|                            | 502300415          | ,000             | ,000  | ,000  | ,000  |
|                            | 502300416          | ,000             | ,000  | ,000  | ,000  |
|                            | 502300811          | ,000             | ,000  | ,000  | ,000  |
|                            | 502300913          | ,000             | ,000  | ,000  | ,000  |
| sv5 kvintiler för standard | 1 tredje kvintilen | ,000             |       |       |       |
|                            | 2 första kvintilen | ,000             |       |       |       |
|                            | 3 andra kvintilen  | ,000             |       |       |       |
|                            | 4 fjärde kvintilen | ,000             |       |       |       |
|                            | 5 femte kvintilen  | 1,000            |       |       |       |

## Categorical Variables Codings

|                            |                    | Parameter coding |       |       |       |
|----------------------------|--------------------|------------------|-------|-------|-------|
|                            |                    | (8)              | (9)   | (10)  | (11)  |
| VASTY2 (SAIR*10000)+VASTY  | 403073101          | ,000             | ,000  | ,000  | ,000  |
|                            | 403073102          | ,000             | ,000  | ,000  | ,000  |
|                            | 403073103          | ,000             | ,000  | ,000  | ,000  |
|                            | 403073202          | ,000             | ,000  | ,000  | ,000  |
|                            | 403073203          | ,000             | ,000  | ,000  | ,000  |
|                            | 403073204          | ,000             | ,000  | ,000  | ,000  |
|                            | 403073303          | ,000             | ,000  | ,000  | ,000  |
|                            | 403073651          | ,000             | ,000  | ,000  | ,000  |
|                            | 403073771          | 1,000            | ,000  | ,000  | ,000  |
|                            | 403133102          | ,000             | 1,000 | ,000  | ,000  |
|                            | 403133106          | ,000             | ,000  | 1,000 | ,000  |
|                            | 403133107          | ,000             | ,000  | ,000  | 1,000 |
|                            | 403133109          | ,000             | ,000  | ,000  | ,000  |
|                            | 403133202          | ,000             | ,000  | ,000  | ,000  |
|                            | 403133203          | ,000             | ,000  | ,000  | ,000  |
|                            | 403133204          | ,000             | ,000  | ,000  | ,000  |
|                            | 403133315          | ,000             | ,000  | ,000  | ,000  |
|                            | 403133322          | ,000             | ,000  | ,000  | ,000  |
|                            | 403133401          | ,000             | ,000  | ,000  | ,000  |
|                            | 403133402          | ,000             | ,000  | ,000  | ,000  |
|                            | 403133550          | ,000             | ,000  | ,000  | ,000  |
|                            | 403133772          | ,000             | ,000  | ,000  | ,000  |
|                            | 403135803          | ,000             | ,000  | ,000  | ,000  |
|                            | 404060001          | ,000             | ,000  | ,000  | ,000  |
|                            | 404060002          | ,000             | ,000  | ,000  | ,000  |
|                            | 404310003          | ,000             | ,000  | ,000  | ,000  |
|                            | 404310004          | ,000             | ,000  | ,000  | ,000  |
|                            | 502300005          | ,000             | ,000  | ,000  | ,000  |
|                            | 502300006          | ,000             | ,000  | ,000  | ,000  |
|                            | 502300007          | ,000             | ,000  | ,000  | ,000  |
|                            | 502300214          | ,000             | ,000  | ,000  | ,000  |
|                            | 502300411          | ,000             | ,000  | ,000  | ,000  |
|                            | 502300415          | ,000             | ,000  | ,000  | ,000  |
|                            | 502300416          | ,000             | ,000  | ,000  | ,000  |
|                            | 502300811          | ,000             | ,000  | ,000  | ,000  |
|                            | 502300913          | ,000             | ,000  | ,000  | ,000  |
| sv5 kvintiler för standard | 1 tredje kvintilen |                  |       |       |       |
|                            | 2 första kvintilen |                  |       |       |       |
|                            | 3 andra kvintilen  |                  |       |       |       |
|                            | 4 fjärde kvintilen |                  |       |       |       |
|                            | 5 femte kvintilen  |                  |       |       |       |

## Categorical Variables Codings

|                            |                    | Parameter coding |       |       |       |
|----------------------------|--------------------|------------------|-------|-------|-------|
|                            |                    | (12)             | (13)  | (14)  | (15)  |
| VASTY2 (SAIR*10000)+VASTY  | 403073101          | ,000             | ,000  | ,000  | ,000  |
|                            | 403073102          | ,000             | ,000  | ,000  | ,000  |
|                            | 403073103          | ,000             | ,000  | ,000  | ,000  |
|                            | 403073202          | ,000             | ,000  | ,000  | ,000  |
|                            | 403073203          | ,000             | ,000  | ,000  | ,000  |
|                            | 403073204          | ,000             | ,000  | ,000  | ,000  |
|                            | 403073303          | ,000             | ,000  | ,000  | ,000  |
|                            | 403073651          | ,000             | ,000  | ,000  | ,000  |
|                            | 403073771          | ,000             | ,000  | ,000  | ,000  |
|                            | 403133102          | ,000             | ,000  | ,000  | ,000  |
|                            | 403133106          | ,000             | ,000  | ,000  | ,000  |
|                            | 403133107          | ,000             | ,000  | ,000  | ,000  |
|                            | 403133109          | 1,000            | ,000  | ,000  | ,000  |
|                            | 403133202          | ,000             | 1,000 | ,000  | ,000  |
|                            | 403133203          | ,000             | ,000  | 1,000 | ,000  |
|                            | 403133204          | ,000             | ,000  | ,000  | 1,000 |
|                            | 403133315          | ,000             | ,000  | ,000  | ,000  |
|                            | 403133322          | ,000             | ,000  | ,000  | ,000  |
|                            | 403133401          | ,000             | ,000  | ,000  | ,000  |
|                            | 403133402          | ,000             | ,000  | ,000  | ,000  |
|                            | 403133550          | ,000             | ,000  | ,000  | ,000  |
|                            | 403133772          | ,000             | ,000  | ,000  | ,000  |
|                            | 403135803          | ,000             | ,000  | ,000  | ,000  |
|                            | 404060001          | ,000             | ,000  | ,000  | ,000  |
|                            | 404060002          | ,000             | ,000  | ,000  | ,000  |
|                            | 404310003          | ,000             | ,000  | ,000  | ,000  |
|                            | 404310004          | ,000             | ,000  | ,000  | ,000  |
|                            | 502300005          | ,000             | ,000  | ,000  | ,000  |
|                            | 502300006          | ,000             | ,000  | ,000  | ,000  |
|                            | 502300007          | ,000             | ,000  | ,000  | ,000  |
|                            | 502300214          | ,000             | ,000  | ,000  | ,000  |
|                            | 502300411          | ,000             | ,000  | ,000  | ,000  |
|                            | 502300415          | ,000             | ,000  | ,000  | ,000  |
|                            | 502300416          | ,000             | ,000  | ,000  | ,000  |
|                            | 502300811          | ,000             | ,000  | ,000  | ,000  |
|                            | 502300913          | ,000             | ,000  | ,000  | ,000  |
| sv5 kvintiler för standard | 1 tredje kvintilen |                  |       |       |       |
|                            | 2 första kvintilen |                  |       |       |       |
|                            | 3 andra kvintilen  |                  |       |       |       |
|                            | 4 fjärde kvintilen |                  |       |       |       |
|                            | 5 femte kvintilen  |                  |       |       |       |

## Categorical Variables Codings

|                            |                    | Parameter coding |       |       |       |
|----------------------------|--------------------|------------------|-------|-------|-------|
|                            |                    | (16)             | (17)  | (18)  | (19)  |
| VASTY2 (SAIR*10000)+VASTY  | 403073101          | ,000             | ,000  | ,000  | ,000  |
|                            | 403073102          | ,000             | ,000  | ,000  | ,000  |
|                            | 403073103          | ,000             | ,000  | ,000  | ,000  |
|                            | 403073202          | ,000             | ,000  | ,000  | ,000  |
|                            | 403073203          | ,000             | ,000  | ,000  | ,000  |
|                            | 403073204          | ,000             | ,000  | ,000  | ,000  |
|                            | 403073303          | ,000             | ,000  | ,000  | ,000  |
|                            | 403073651          | ,000             | ,000  | ,000  | ,000  |
|                            | 403073771          | ,000             | ,000  | ,000  | ,000  |
|                            | 403133102          | ,000             | ,000  | ,000  | ,000  |
|                            | 403133106          | ,000             | ,000  | ,000  | ,000  |
|                            | 403133107          | ,000             | ,000  | ,000  | ,000  |
|                            | 403133109          | ,000             | ,000  | ,000  | ,000  |
|                            | 403133202          | ,000             | ,000  | ,000  | ,000  |
|                            | 403133203          | ,000             | ,000  | ,000  | ,000  |
|                            | 403133204          | ,000             | ,000  | ,000  | ,000  |
|                            | 403133315          | 1,000            | ,000  | ,000  | ,000  |
|                            | 403133322          | ,000             | 1,000 | ,000  | ,000  |
|                            | 403133401          | ,000             | ,000  | 1,000 | ,000  |
|                            | 403133402          | ,000             | ,000  | ,000  | 1,000 |
|                            | 403133550          | ,000             | ,000  | ,000  | ,000  |
|                            | 403133772          | ,000             | ,000  | ,000  | ,000  |
|                            | 403135803          | ,000             | ,000  | ,000  | ,000  |
|                            | 404060001          | ,000             | ,000  | ,000  | ,000  |
|                            | 404060002          | ,000             | ,000  | ,000  | ,000  |
|                            | 404310003          | ,000             | ,000  | ,000  | ,000  |
|                            | 404310004          | ,000             | ,000  | ,000  | ,000  |
|                            | 502300005          | ,000             | ,000  | ,000  | ,000  |
|                            | 502300006          | ,000             | ,000  | ,000  | ,000  |
|                            | 502300007          | ,000             | ,000  | ,000  | ,000  |
|                            | 502300214          | ,000             | ,000  | ,000  | ,000  |
|                            | 502300411          | ,000             | ,000  | ,000  | ,000  |
|                            | 502300415          | ,000             | ,000  | ,000  | ,000  |
|                            | 502300416          | ,000             | ,000  | ,000  | ,000  |
|                            | 502300811          | ,000             | ,000  | ,000  | ,000  |
|                            | 502300913          | ,000             | ,000  | ,000  | ,000  |
| sv5 kvintiler för standard | 1 tredje kvintilen |                  |       |       |       |
|                            | 2 första kvintilen |                  |       |       |       |
|                            | 3 andra kvintilen  |                  |       |       |       |
|                            | 4 fjärde kvintilen |                  |       |       |       |
|                            | 5 femte kvintilen  |                  |       |       |       |

## Categorical Variables Codings

|                            |                    | Parameter coding |       |       |       |
|----------------------------|--------------------|------------------|-------|-------|-------|
|                            |                    | (20)             | (21)  | (22)  | (23)  |
| VASTY2 (SAIR*10000)+VASTY  | 403073101          | ,000             | ,000  | ,000  | ,000  |
|                            | 403073102          | ,000             | ,000  | ,000  | ,000  |
|                            | 403073103          | ,000             | ,000  | ,000  | ,000  |
|                            | 403073202          | ,000             | ,000  | ,000  | ,000  |
|                            | 403073203          | ,000             | ,000  | ,000  | ,000  |
|                            | 403073204          | ,000             | ,000  | ,000  | ,000  |
|                            | 403073303          | ,000             | ,000  | ,000  | ,000  |
|                            | 403073651          | ,000             | ,000  | ,000  | ,000  |
|                            | 403073771          | ,000             | ,000  | ,000  | ,000  |
|                            | 403133102          | ,000             | ,000  | ,000  | ,000  |
|                            | 403133106          | ,000             | ,000  | ,000  | ,000  |
|                            | 403133107          | ,000             | ,000  | ,000  | ,000  |
|                            | 403133109          | ,000             | ,000  | ,000  | ,000  |
|                            | 403133202          | ,000             | ,000  | ,000  | ,000  |
|                            | 403133203          | ,000             | ,000  | ,000  | ,000  |
|                            | 403133204          | ,000             | ,000  | ,000  | ,000  |
|                            | 403133315          | ,000             | ,000  | ,000  | ,000  |
|                            | 403133322          | ,000             | ,000  | ,000  | ,000  |
|                            | 403133401          | ,000             | ,000  | ,000  | ,000  |
|                            | 403133402          | ,000             | ,000  | ,000  | ,000  |
|                            | 403133550          | 1,000            | ,000  | ,000  | ,000  |
|                            | 403133772          | ,000             | 1,000 | ,000  | ,000  |
|                            | 403135803          | ,000             | ,000  | 1,000 | ,000  |
|                            | 404060001          | ,000             | ,000  | ,000  | 1,000 |
|                            | 404060002          | ,000             | ,000  | ,000  | ,000  |
|                            | 404310003          | ,000             | ,000  | ,000  | ,000  |
|                            | 404310004          | ,000             | ,000  | ,000  | ,000  |
|                            | 502300005          | ,000             | ,000  | ,000  | ,000  |
|                            | 502300006          | ,000             | ,000  | ,000  | ,000  |
|                            | 502300007          | ,000             | ,000  | ,000  | ,000  |
|                            | 502300214          | ,000             | ,000  | ,000  | ,000  |
|                            | 502300411          | ,000             | ,000  | ,000  | ,000  |
|                            | 502300415          | ,000             | ,000  | ,000  | ,000  |
|                            | 502300416          | ,000             | ,000  | ,000  | ,000  |
|                            | 502300811          | ,000             | ,000  | ,000  | ,000  |
|                            | 502300913          | ,000             | ,000  | ,000  | ,000  |
| sv5 kvintiler för standard | 1 tredje kvintilen |                  |       |       |       |
|                            | 2 första kvintilen |                  |       |       |       |
|                            | 3 andra kvintilen  |                  |       |       |       |
|                            | 4 fjärde kvintilen |                  |       |       |       |
|                            | 5 femte kvintilen  |                  |       |       |       |

## Categorical Variables Codings

|                            |                    | Parameter coding |       |       |       |
|----------------------------|--------------------|------------------|-------|-------|-------|
|                            |                    | (24)             | (25)  | (26)  | (27)  |
| VASTY2 (SAIR*10000)+VASTY  | 403073101          | ,000             | ,000  | ,000  | ,000  |
|                            | 403073102          | ,000             | ,000  | ,000  | ,000  |
|                            | 403073103          | ,000             | ,000  | ,000  | ,000  |
|                            | 403073202          | ,000             | ,000  | ,000  | ,000  |
|                            | 403073203          | ,000             | ,000  | ,000  | ,000  |
|                            | 403073204          | ,000             | ,000  | ,000  | ,000  |
|                            | 403073303          | ,000             | ,000  | ,000  | ,000  |
|                            | 403073651          | ,000             | ,000  | ,000  | ,000  |
|                            | 403073771          | ,000             | ,000  | ,000  | ,000  |
|                            | 403133102          | ,000             | ,000  | ,000  | ,000  |
|                            | 403133106          | ,000             | ,000  | ,000  | ,000  |
|                            | 403133107          | ,000             | ,000  | ,000  | ,000  |
|                            | 403133109          | ,000             | ,000  | ,000  | ,000  |
|                            | 403133202          | ,000             | ,000  | ,000  | ,000  |
|                            | 403133203          | ,000             | ,000  | ,000  | ,000  |
|                            | 403133204          | ,000             | ,000  | ,000  | ,000  |
|                            | 403133315          | ,000             | ,000  | ,000  | ,000  |
|                            | 403133322          | ,000             | ,000  | ,000  | ,000  |
|                            | 403133401          | ,000             | ,000  | ,000  | ,000  |
|                            | 403133402          | ,000             | ,000  | ,000  | ,000  |
|                            | 403133550          | ,000             | ,000  | ,000  | ,000  |
|                            | 403133772          | ,000             | ,000  | ,000  | ,000  |
|                            | 403135803          | ,000             | ,000  | ,000  | ,000  |
|                            | 404060001          | ,000             | ,000  | ,000  | ,000  |
|                            | 404060002          | 1,000            | ,000  | ,000  | ,000  |
|                            | 404310003          | ,000             | 1,000 | ,000  | ,000  |
|                            | 404310004          | ,000             | ,000  | 1,000 | ,000  |
|                            | 502300005          | ,000             | ,000  | ,000  | 1,000 |
|                            | 502300006          | ,000             | ,000  | ,000  | ,000  |
|                            | 502300007          | ,000             | ,000  | ,000  | ,000  |
|                            | 502300214          | ,000             | ,000  | ,000  | ,000  |
|                            | 502300411          | ,000             | ,000  | ,000  | ,000  |
|                            | 502300415          | ,000             | ,000  | ,000  | ,000  |
|                            | 502300416          | ,000             | ,000  | ,000  | ,000  |
|                            | 502300811          | ,000             | ,000  | ,000  | ,000  |
|                            | 502300913          | ,000             | ,000  | ,000  | ,000  |
| sv5 kvintiler för standard | 1 tredje kvintilen |                  |       |       |       |
|                            | 2 första kvintilen |                  |       |       |       |
|                            | 3 andra kvintilen  |                  |       |       |       |
|                            | 4 fjärde kvintilen |                  |       |       |       |
|                            | 5 femte kvintilen  |                  |       |       |       |

## Categorical Variables Codings

|                            |                    | Parameter coding |       |       |       |
|----------------------------|--------------------|------------------|-------|-------|-------|
|                            |                    | (28)             | (29)  | (30)  | (31)  |
| VASTY2 (SAIR*10000)+VASTY  | 403073101          | ,000             | ,000  | ,000  | ,000  |
|                            | 403073102          | ,000             | ,000  | ,000  | ,000  |
|                            | 403073103          | ,000             | ,000  | ,000  | ,000  |
|                            | 403073202          | ,000             | ,000  | ,000  | ,000  |
|                            | 403073203          | ,000             | ,000  | ,000  | ,000  |
|                            | 403073204          | ,000             | ,000  | ,000  | ,000  |
|                            | 403073303          | ,000             | ,000  | ,000  | ,000  |
|                            | 403073651          | ,000             | ,000  | ,000  | ,000  |
|                            | 403073771          | ,000             | ,000  | ,000  | ,000  |
|                            | 403133102          | ,000             | ,000  | ,000  | ,000  |
|                            | 403133106          | ,000             | ,000  | ,000  | ,000  |
|                            | 403133107          | ,000             | ,000  | ,000  | ,000  |
|                            | 403133109          | ,000             | ,000  | ,000  | ,000  |
|                            | 403133202          | ,000             | ,000  | ,000  | ,000  |
|                            | 403133203          | ,000             | ,000  | ,000  | ,000  |
|                            | 403133204          | ,000             | ,000  | ,000  | ,000  |
|                            | 403133315          | ,000             | ,000  | ,000  | ,000  |
|                            | 403133322          | ,000             | ,000  | ,000  | ,000  |
|                            | 403133401          | ,000             | ,000  | ,000  | ,000  |
|                            | 403133402          | ,000             | ,000  | ,000  | ,000  |
|                            | 403133550          | ,000             | ,000  | ,000  | ,000  |
|                            | 403133772          | ,000             | ,000  | ,000  | ,000  |
|                            | 403135803          | ,000             | ,000  | ,000  | ,000  |
|                            | 404060001          | ,000             | ,000  | ,000  | ,000  |
|                            | 404060002          | ,000             | ,000  | ,000  | ,000  |
|                            | 404310003          | ,000             | ,000  | ,000  | ,000  |
|                            | 404310004          | ,000             | ,000  | ,000  | ,000  |
|                            | 502300005          | ,000             | ,000  | ,000  | ,000  |
|                            | 502300006          | 1,000            | ,000  | ,000  | ,000  |
|                            | 502300007          | ,000             | 1,000 | ,000  | ,000  |
|                            | 502300214          | ,000             | ,000  | 1,000 | ,000  |
|                            | 502300411          | ,000             | ,000  | ,000  | 1,000 |
|                            | 502300415          | ,000             | ,000  | ,000  | ,000  |
|                            | 502300416          | ,000             | ,000  | ,000  | ,000  |
|                            | 502300811          | ,000             | ,000  | ,000  | ,000  |
|                            | 502300913          | ,000             | ,000  | ,000  | ,000  |
| sv5 kvintiler för standard | 1 tredje kvintilen |                  |       |       |       |
|                            | 2 första kvintilen |                  |       |       |       |
|                            | 3 andra kvintilen  |                  |       |       |       |
|                            | 4 fjärde kvintilen |                  |       |       |       |
|                            | 5 femte kvintilen  |                  |       |       |       |



## Categorical Variables Codings

|                            |                    | Parameter coding |       |       |       |
|----------------------------|--------------------|------------------|-------|-------|-------|
|                            |                    | (32)             | (33)  | (34)  | (35)  |
| VASTY2 (SAIR*10000)+VASTY  | 403073101          | ,000             | ,000  | ,000  | ,000  |
|                            | 403073102          | ,000             | ,000  | ,000  | ,000  |
|                            | 403073103          | ,000             | ,000  | ,000  | ,000  |
|                            | 403073202          | ,000             | ,000  | ,000  | ,000  |
|                            | 403073203          | ,000             | ,000  | ,000  | ,000  |
|                            | 403073204          | ,000             | ,000  | ,000  | ,000  |
|                            | 403073303          | ,000             | ,000  | ,000  | ,000  |
|                            | 403073651          | ,000             | ,000  | ,000  | ,000  |
|                            | 403073771          | ,000             | ,000  | ,000  | ,000  |
|                            | 403133102          | ,000             | ,000  | ,000  | ,000  |
|                            | 403133106          | ,000             | ,000  | ,000  | ,000  |
|                            | 403133107          | ,000             | ,000  | ,000  | ,000  |
|                            | 403133109          | ,000             | ,000  | ,000  | ,000  |
|                            | 403133202          | ,000             | ,000  | ,000  | ,000  |
|                            | 403133203          | ,000             | ,000  | ,000  | ,000  |
|                            | 403133204          | ,000             | ,000  | ,000  | ,000  |
|                            | 403133315          | ,000             | ,000  | ,000  | ,000  |
|                            | 403133322          | ,000             | ,000  | ,000  | ,000  |
|                            | 403133401          | ,000             | ,000  | ,000  | ,000  |
|                            | 403133402          | ,000             | ,000  | ,000  | ,000  |
|                            | 403133550          | ,000             | ,000  | ,000  | ,000  |
|                            | 403133772          | ,000             | ,000  | ,000  | ,000  |
|                            | 403135803          | ,000             | ,000  | ,000  | ,000  |
|                            | 404060001          | ,000             | ,000  | ,000  | ,000  |
|                            | 404060002          | ,000             | ,000  | ,000  | ,000  |
|                            | 404310003          | ,000             | ,000  | ,000  | ,000  |
|                            | 404310004          | ,000             | ,000  | ,000  | ,000  |
|                            | 502300005          | ,000             | ,000  | ,000  | ,000  |
|                            | 502300006          | ,000             | ,000  | ,000  | ,000  |
|                            | 502300007          | ,000             | ,000  | ,000  | ,000  |
|                            | 502300214          | ,000             | ,000  | ,000  | ,000  |
|                            | 502300411          | ,000             | ,000  | ,000  | ,000  |
|                            | 502300415          | 1,000            | ,000  | ,000  | ,000  |
|                            | 502300416          | ,000             | 1,000 | ,000  | ,000  |
|                            | 502300811          | ,000             | ,000  | 1,000 | ,000  |
|                            | 502300913          | ,000             | ,000  | ,000  | 1,000 |
| sv5 kvintiler för standard | 1 tredje kvintilen |                  |       |       |       |
|                            | 2 första kvintilen |                  |       |       |       |
|                            | 3 andra kvintilen  |                  |       |       |       |
|                            | 4 fjärde kvintilen |                  |       |       |       |
|                            | 5 femte kvintilen  |                  |       |       |       |

1  
2  
3  
4 **Block 0: Beginning Block**  
5

6 **Classification Table<sup>a,b</sup>**

7  
8  
9  
10  
11  
12  
13  
14

|                    |                                                |                                                              |
|--------------------|------------------------------------------------|--------------------------------------------------------------|
| Observed           |                                                |                                                              |
| Step 0             | luonnelt1 luonne highest = tapahtui potilaalle | 0 ingen händelse eller läheltä piti<br>1 tapahtui potilaalle |
| Overall Percentage |                                                |                                                              |

19 **Classification Table<sup>a,b</sup>**

20  
21  
22  
23  
24  
25  
26  
27  
28  
29  
30  
31

|                                                       |  |  |                                     |
|-------------------------------------------------------|--|--|-------------------------------------|
| Observed                                              |  |  | Predicted                           |
|                                                       |  |  | luonnelt1 luonne highest = ...      |
| Step 0 luonnelt1 luonne highest = tapahtui potilaalle |  |  | 0 ingen händelse eller läheltä piti |
|                                                       |  |  | 1 tapahtui potilaalle               |
| Overall Percentage                                    |  |  | 11627<br>848                        |

32 **Classification Table<sup>a,b</sup>**

33  
34  
35  
36  
37  
38  
39  
40  
41  
42  
43  
44  
45

|                                                       |  |  |                                     |
|-------------------------------------------------------|--|--|-------------------------------------|
| Observed                                              |  |  | Predicted                           |
|                                                       |  |  | luonnelt1 luonne highest ...        |
| Step 0 luonnelt1 luonne highest = tapahtui potilaalle |  |  | 1 tapahtui potilaalle               |
|                                                       |  |  | 0 ingen händelse eller läheltä piti |
| Overall Percentage                                    |  |  | 0<br>0                              |

46 **Classification Table<sup>a,b</sup>**

47  
48  
49  
50  
51  
52  
53  
54  
55  
56  
57  
58  
59  
60

|                                                       |  |  |                                                              |
|-------------------------------------------------------|--|--|--------------------------------------------------------------|
| Observed                                              |  |  | Predicted                                                    |
|                                                       |  |  | Percentage Correct                                           |
| Step 0 luonnelt1 luonne highest = tapahtui potilaalle |  |  | 100,0                                                        |
|                                                       |  |  | 0 ingen händelse eller läheltä piti<br>1 tapahtui potilaalle |
| Overall Percentage                                    |  |  | ,0<br>93,2                                                   |

a. Constant is included in the model.

b. The cut value is ,500

#### Variables in the Equation

|                 | B      | S.E. | Wald     | df | Sig. | Exp(B) |
|-----------------|--------|------|----------|----|------|--------|
| Step 0 Constant | -2,618 | ,036 | 5417,889 | 1  | ,000 | ,073   |

#### Variables not in the Equation

|                      | Score   | df | Sig. |
|----------------------|---------|----|------|
| Step 0 Variables sv5 | 15,331  | 4  | ,004 |
| sv5(1)               | 10,247  | 1  | ,001 |
| sv5(2)               | ,767    | 1  | ,381 |
| sv5(3)               | 1,370   | 1  | ,242 |
| sv5(4)               | 8,120   | 1  | ,004 |
| VASTY2               | 299,491 | 35 | ,000 |
| VASTY2(1)            | ,007    | 1  | ,934 |
| VASTY2(2)            | 8,968   | 1  | ,003 |
| VASTY2(3)            | 15,764  | 1  | ,000 |
| VASTY2(4)            | ,453    | 1  | ,501 |
| VASTY2(5)            | ,965    | 1  | ,326 |
| VASTY2(6)            | 14,062  | 1  | ,000 |
| VASTY2(7)            | 12,067  | 1  | ,001 |
| VASTY2(8)            | 1,504   | 1  | ,220 |
| VASTY2(9)            | 1,612   | 1  | ,204 |
| VASTY2(10)           | 55,161  | 1  | ,000 |
| VASTY2(11)           | 11,675  | 1  | ,001 |
| VASTY2(12)           | ,213    | 1  | ,644 |
| VASTY2(13)           | 55,161  | 1  | ,000 |
| VASTY2(14)           | 1,504   | 1  | ,220 |
| VASTY2(15)           | 1,199   | 1  | ,273 |
| VASTY2(16)           | 3,222   | 1  | ,073 |
| VASTY2(17)           | 12,590  | 1  | ,000 |
| VASTY2(18)           | 7,137   | 1  | ,008 |
| VASTY2(19)           | 19,294  | 1  | ,000 |
| VASTY2(20)           | ,030    | 1  | ,863 |
| VASTY2(21)           | ,647    | 1  | ,421 |
| VASTY2(22)           | ,782    | 1  | ,377 |
| VASTY2(23)           | 1,199   | 1  | ,273 |
| VASTY2(24)           | 2,253   | 1  | ,133 |
| VASTY2(25)           | 1,513   | 1  | ,219 |
| VASTY2(26)           | 7,708   | 1  | ,005 |
| VASTY2(27)           | 15,836  | 1  | ,000 |
| VASTY2(28)           | 6,172   | 1  | ,013 |
| VASTY2(29)           | 11,203  | 1  | ,001 |
| VASTY2(30)           | 1,058   | 1  | ,304 |

## Variables not in the Equation

|                    | Score   | df | Sig. |
|--------------------|---------|----|------|
| VASTY2(31)         | 6,527   | 1  | ,011 |
| VASTY2(32)         | ,544    | 1  | ,461 |
| VASTY2(33)         | ,126    | 1  | ,723 |
| VASTY2(34)         | 14,062  | 1  | ,000 |
| VASTY2(35)         | 15,901  | 1  | ,000 |
| Overall Statistics | 305,102 | 39 | ,000 |

## Block 1: Method = Enter

## Omnibus Tests of Model Coefficients

|             | Chi-square | df | Sig. |
|-------------|------------|----|------|
| Step 1 Step | 312,321    | 39 | ,000 |
| Block       | 312,321    | 39 | ,000 |
| Model       | 312,321    | 39 | ,000 |

## Model Summary

| Step | -2 Log likelihood     | Cox & Snell R Square | Nagelkerke R Square |
|------|-----------------------|----------------------|---------------------|
| 1    | 5884,551 <sup>a</sup> | ,025                 | ,063                |

a. Estimation terminated at iteration number 7 because parameter estimates changed by less than ,001.

Classification Table<sup>a</sup>

| Observed           |                                                | Predicted                           |                       |
|--------------------|------------------------------------------------|-------------------------------------|-----------------------|
| Step 1             | luonnelt1 luonne highest = tapahtui potilaalle | 0 ingen händelse eller läheltä piti | 1 tapahtui potilaalle |
| Overall Percentage |                                                |                                     |                       |

Classification Table<sup>a</sup>

| Observed           |                                                | Predicted                           |       |
|--------------------|------------------------------------------------|-------------------------------------|-------|
| Step 1             | luonnelt1 luonne highest = tapahtui potilaalle | 0 ingen händelse eller läheltä piti | 11627 |
| Overall Percentage |                                                | 1 tapahtui potilaalle               | 848   |

Classification Table<sup>a</sup>

| Observed           |                                                | Predicted                           |                          |
|--------------------|------------------------------------------------|-------------------------------------|--------------------------|
|                    |                                                | luonnelt1<br>luonne highest ...     | 1 tapahtui<br>potilaalle |
| Step 1             | luonnelt1 luonne highest = tapahtui potilaalle | 0 ingen händelse eller läheltä piti | 0                        |
|                    |                                                | 1 tapahtui potilaalle               | 0                        |
| Overall Percentage |                                                |                                     |                          |

Classification Table<sup>a</sup>

| Observed           |                                                | Predicted                           |       |
|--------------------|------------------------------------------------|-------------------------------------|-------|
|                    |                                                | Percentage<br>Correct               |       |
| Step 1             | luonnelt1 luonne highest = tapahtui potilaalle | 0 ingen händelse eller läheltä piti | 100,0 |
|                    |                                                | 1 tapahtui potilaalle               | ,0    |
| Overall Percentage |                                                |                                     | 93,2  |

a. The cut value is ,500

## Variables in the Equation

|                     |            | B      | S.E. | Wald    | df | Sig. | Exp(B) |
|---------------------|------------|--------|------|---------|----|------|--------|
| Step 1 <sup>a</sup> | sv5        |        |      | 5,125   | 4  | ,275 |        |
|                     | sv5(1)     | -,090  | ,133 | ,453    | 1  | ,501 | ,914   |
|                     | sv5(2)     | -,027  | ,136 | ,040    | 1  | ,842 | ,973   |
|                     | sv5(3)     | ,009   | ,124 | ,005    | 1  | ,944 | 1,009  |
|                     | sv5(4)     | ,207   | ,133 | 2,422   | 1  | ,120 | 1,230  |
|                     | VASTY2     |        |      | 231,791 | 35 | ,000 |        |
|                     | VASTY2(1)  | ,055   | ,300 | ,034    | 1  | ,854 | 1,057  |
|                     | VASTY2(2)  | ,454   | ,280 | 2,626   | 1  | ,105 | 1,575  |
|                     | VASTY2(3)  | -1,378 | ,465 | 8,785   | 1  | ,003 | ,252   |
|                     | VASTY2(4)  | ,225   | ,292 | ,594    | 1  | ,441 | 1,252  |
|                     | VASTY2(5)  | -,116  | ,326 | ,126    | 1  | ,722 | ,890   |
|                     | VASTY2(6)  | -1,405 | ,446 | 9,928   | 1  | ,002 | ,245   |
|                     | VASTY2(7)  | ,659   | ,272 | 5,868   | 1  | ,015 | 1,933  |
|                     | VASTY2(8)  | -,176  | ,320 | ,302    | 1  | ,583 | ,839   |
|                     | VASTY2(9)  | ,325   | ,290 | 1,256   | 1  | ,263 | 1,384  |
|                     | VASTY2(10) | ,929   | ,267 | 12,153  | 1  | ,000 | 2,532  |
|                     | VASTY2(11) | ,629   | ,272 | 5,343   | 1  | ,021 | 1,875  |
|                     | VASTY2(12) | ,074   | ,298 | ,062    | 1  | ,804 | 1,077  |
|                     | VASTY2(13) | ,923   | ,267 | 11,931  | 1  | ,001 | 2,518  |
|                     | VASTY2(14) | -,286  | ,322 | ,790    | 1  | ,374 | ,751   |
|                     | VASTY2(15) | ,171   | ,293 | ,342    | 1  | ,559 | 1,187  |
|                     | VASTY2(16) | ,476   | ,331 | 2,065   | 1  | ,151 | 1,609  |
|                     | VASTY2(17) | -1,084 | ,418 | 6,723   | 1  | ,010 | ,338   |
|                     | VASTY2(18) | -,589  | ,375 | 2,465   | 1  | ,116 | ,555   |
|                     | VASTY2(19) | -1,717 | ,555 | 9,571   | 1  | ,002 | ,180   |
|                     | VASTY2(20) | ,028   | ,316 | ,008    | 1  | ,929 | 1,029  |
|                     | VASTY2(21) | -,076  | ,312 | ,059    | 1  | ,807 | ,927   |
|                     | VASTY2(22) | ,244   | ,290 | ,709    | 1  | ,400 | 1,276  |
|                     | VASTY2(23) | ,296   | ,288 | 1,060   | 1  | ,303 | 1,345  |
|                     | VASTY2(24) | ,302   | ,285 | 1,122   | 1  | ,290 | 1,353  |
|                     | VASTY2(25) | ,361   | ,302 | 1,436   | 1  | ,231 | 1,435  |
|                     | VASTY2(26) | -,883  | ,419 | 4,447   | 1  | ,035 | ,414   |
|                     | VASTY2(27) | -1,493 | ,467 | 10,210  | 1  | ,001 | ,225   |
|                     | VASTY2(28) | -1,098 | ,476 | 5,322   | 1  | ,021 | ,334   |
|                     | VASTY2(29) | -1,189 | ,412 | 8,328   | 1  | ,004 | ,305   |
|                     | VASTY2(30) | -,120  | ,316 | ,145    | 1  | ,704 | ,887   |
|                     | VASTY2(31) | ,586   | ,286 | 4,181   | 1  | ,041 | 1,796  |
|                     | VASTY2(32) | ,002   | ,324 | ,000    | 1  | ,994 | 1,002  |
|                     | VASTY2(33) | ,092   | ,319 | ,084    | 1  | ,772 | 1,097  |
|                     | VASTY2(34) | -1,236 | ,438 | 7,945   | 1  | ,005 | ,291   |
|                     | VASTY2(35) | ,728   | ,276 | 6,954   | 1  | ,008 | 2,072  |
|                     | Constant   | -2,696 | ,229 | 138,940 | 1  | ,000 | ,067   |

## Variables in the Equation

|                     |            | 95% C.I. for EXP(B) |       |
|---------------------|------------|---------------------|-------|
|                     |            | Lower               | Upper |
| Step 1 <sup>a</sup> | sv5        |                     |       |
|                     | sv5(1)     | ,704                | 1,187 |
|                     | sv5(2)     | ,746                | 1,271 |
|                     | sv5(3)     | ,791                | 1,287 |
|                     | sv5(4)     | ,948                | 1,598 |
|                     | VASTY2     |                     |       |
|                     | VASTY2(1)  | ,587                | 1,903 |
|                     | VASTY2(2)  | ,909                | 2,728 |
|                     | VASTY2(3)  | ,101                | ,627  |
|                     | VASTY2(4)  | ,707                | 2,220 |
|                     | VASTY2(5)  | ,470                | 1,688 |
|                     | VASTY2(6)  | ,102                | ,588  |
|                     | VASTY2(7)  | 1,134               | 3,296 |
|                     | VASTY2(8)  | ,448                | 1,572 |
|                     | VASTY2(9)  | ,784                | 2,444 |
|                     | VASTY2(10) | 1,502               | 4,270 |
|                     | VASTY2(11) | 1,100               | 3,196 |
|                     | VASTY2(12) | ,601                | 1,931 |
|                     | VASTY2(13) | 1,491               | 4,252 |
|                     | VASTY2(14) | ,400                | 1,412 |
|                     | VASTY2(15) | ,668                | 2,108 |
|                     | VASTY2(16) | ,841                | 3,079 |
|                     | VASTY2(17) | ,149                | ,768  |
|                     | VASTY2(18) | ,266                | 1,158 |
|                     | VASTY2(19) | ,061                | ,533  |
|                     | VASTY2(20) | ,554                | 1,911 |
|                     | VASTY2(21) | ,503                | 1,708 |
|                     | VASTY2(22) | ,723                | 2,252 |
|                     | VASTY2(23) | ,765                | 2,365 |
|                     | VASTY2(24) | ,773                | 2,365 |
|                     | VASTY2(25) | ,795                | 2,592 |
|                     | VASTY2(26) | ,182                | ,940  |
|                     | VASTY2(27) | ,090                | ,561  |
|                     | VASTY2(28) | ,131                | ,848  |
|                     | VASTY2(29) | ,136                | ,683  |
|                     | VASTY2(30) | ,477                | 1,648 |
|                     | VASTY2(31) | 1,025               | 3,149 |
|                     | VASTY2(32) | ,531                | 1,892 |
|                     | VASTY2(33) | ,587                | 2,048 |
|                     | VASTY2(34) | ,123                | ,686  |
|                     | VASTY2(35) | 1,206               | 3,560 |
|                     | Constant   |                     |       |

a. Variable(s) entered on step 1: sv5, VASTY2.

```
LOGISTIC REGRESSION VARIABLES luonnelt1
/METHOD=ENTER sv7 VASTY2
/CONTRAST (sv7)=Indicator(1)
/CONTRAST (VASTY2)=Indicator(1)
/PRINT=CI(95)
/CRITERIA=PIN(0.05) POUT(0.10) ITERATE(20) CUT(0.5).
```

## Logistic Regression

[DataSet6] C:\cWordjan\Rafaela\_VCS\alla\_tillsammans\abo\_bjo\_vasa\_v1.sav

### Case Processing Summary

| Unweighted Cases <sup>a</sup> |                      | N     | Percent |
|-------------------------------|----------------------|-------|---------|
| Selected Cases                | Included in Analysis | 12475 | 100,0   |
|                               | Missing Cases        | 0     | ,0      |
|                               | Total                | 12475 | 100,0   |
| Unselected Cases              |                      | 0     | ,0      |
| Total                         |                      | 12475 | 100,0   |

a. If weight is in effect, see classification table for the total number of cases.

### Dependent Variable Encoding

| Original Value                      | Internal Value |
|-------------------------------------|----------------|
| 0 ingen händelse eller läheltä piti | 0              |
| 1 taphtui potilaalle                | 1              |



## Categorical Variables Codings

|                                                   | Frequency | Parameter coding |       |       |
|---------------------------------------------------|-----------|------------------|-------|-------|
|                                                   |           | (1)              | (2)   | (3)   |
| VASTY2 (SAIR*10000)+VASTY 403073101               | 365       | ,000             | ,000  | ,000  |
| 403073102                                         | 362       | 1,000            | ,000  | ,000  |
| 403073103                                         | 365       | ,000             | 1,000 | ,000  |
| 403073202                                         | 365       | ,000             | ,000  | 1,000 |
| 403073203                                         | 365       | ,000             | ,000  | ,000  |
| 403073204                                         | 330       | ,000             | ,000  | ,000  |
| 403073303                                         | 364       | ,000             | ,000  | ,000  |
| 403073651                                         | 362       | ,000             | ,000  | ,000  |
| 403073771                                         | 365       | ,000             | ,000  | ,000  |
| 403133102                                         | 341       | ,000             | ,000  | ,000  |
| 403133106                                         | 365       | ,000             | ,000  | ,000  |
| 403133107                                         | 365       | ,000             | ,000  | ,000  |
| 403133109                                         | 365       | ,000             | ,000  | ,000  |
| 403133202                                         | 365       | ,000             | ,000  | ,000  |
| 403133203                                         | 365       | ,000             | ,000  | ,000  |
| 403133204                                         | 365       | ,000             | ,000  | ,000  |
| 403133315                                         | 177       | ,000             | ,000  | ,000  |
| 403133322                                         | 365       | ,000             | ,000  | ,000  |
| 403133401                                         | 362       | ,000             | ,000  | ,000  |
| 403133402                                         | 365       | ,000             | ,000  | ,000  |
| 403133550                                         | 298       | ,000             | ,000  | ,000  |
| 403133772                                         | 365       | ,000             | ,000  | ,000  |
| 403135803                                         | 365       | ,000             | ,000  | ,000  |
| 404060001                                         | 365       | ,000             | ,000  | ,000  |
| 404060002                                         | 366       | ,000             | ,000  | ,000  |
| 404310003                                         | 291       | ,000             | ,000  | ,000  |
| 404310004                                         | 291       | ,000             | ,000  | ,000  |
| 502300005                                         | 366       | ,000             | ,000  | ,000  |
| 502300006                                         | 225       | ,000             | ,000  | ,000  |
| 502300007                                         | 366       | ,000             | ,000  | ,000  |
| 502300214                                         | 366       | ,000             | ,000  | ,000  |
| 502300411                                         | 366       | ,000             | ,000  | ,000  |
| 502300415                                         | 360       | ,000             | ,000  | ,000  |
| 502300416                                         | 363       | ,000             | ,000  | ,000  |
| 502300811                                         | 364       | ,000             | ,000  | ,000  |
| 502300913                                         | 315       | ,000             | ,000  | ,000  |
| sv7 sjättedelar för standard 1 fjärde sjundedelen | 1423      | ,000             | ,000  | ,000  |
| 2 första sjundedelen                              | 3031      | 1,000            | ,000  | ,000  |

## Categorical Variables Codings

|                              |                      | Parameter coding |       |       |       |
|------------------------------|----------------------|------------------|-------|-------|-------|
|                              |                      | (4)              | (5)   | (6)   | (7)   |
| VASTY2 (SAIR*10000)+VASTY    | 403073101            | ,000             | ,000  | ,000  | ,000  |
|                              | 403073102            | ,000             | ,000  | ,000  | ,000  |
|                              | 403073103            | ,000             | ,000  | ,000  | ,000  |
|                              | 403073202            | ,000             | ,000  | ,000  | ,000  |
|                              | 403073203            | 1,000            | ,000  | ,000  | ,000  |
|                              | 403073204            | ,000             | 1,000 | ,000  | ,000  |
|                              | 403073303            | ,000             | ,000  | 1,000 | ,000  |
|                              | 403073651            | ,000             | ,000  | ,000  | 1,000 |
|                              | 403073771            | ,000             | ,000  | ,000  | ,000  |
|                              | 403133102            | ,000             | ,000  | ,000  | ,000  |
|                              | 403133106            | ,000             | ,000  | ,000  | ,000  |
|                              | 403133107            | ,000             | ,000  | ,000  | ,000  |
|                              | 403133109            | ,000             | ,000  | ,000  | ,000  |
|                              | 403133202            | ,000             | ,000  | ,000  | ,000  |
|                              | 403133203            | ,000             | ,000  | ,000  | ,000  |
|                              | 403133204            | ,000             | ,000  | ,000  | ,000  |
|                              | 403133315            | ,000             | ,000  | ,000  | ,000  |
|                              | 403133322            | ,000             | ,000  | ,000  | ,000  |
|                              | 403133401            | ,000             | ,000  | ,000  | ,000  |
|                              | 403133402            | ,000             | ,000  | ,000  | ,000  |
|                              | 403133550            | ,000             | ,000  | ,000  | ,000  |
|                              | 403133772            | ,000             | ,000  | ,000  | ,000  |
|                              | 403135803            | ,000             | ,000  | ,000  | ,000  |
|                              | 404060001            | ,000             | ,000  | ,000  | ,000  |
|                              | 404060002            | ,000             | ,000  | ,000  | ,000  |
|                              | 404310003            | ,000             | ,000  | ,000  | ,000  |
|                              | 404310004            | ,000             | ,000  | ,000  | ,000  |
|                              | 502300005            | ,000             | ,000  | ,000  | ,000  |
|                              | 502300006            | ,000             | ,000  | ,000  | ,000  |
|                              | 502300007            | ,000             | ,000  | ,000  | ,000  |
|                              | 502300214            | ,000             | ,000  | ,000  | ,000  |
|                              | 502300411            | ,000             | ,000  | ,000  | ,000  |
|                              | 502300415            | ,000             | ,000  | ,000  | ,000  |
|                              | 502300416            | ,000             | ,000  | ,000  | ,000  |
|                              | 502300811            | ,000             | ,000  | ,000  | ,000  |
|                              | 502300913            | ,000             | ,000  | ,000  | ,000  |
| sv7 sjättedelar för standard | 1 fjärde sjundedelen | ,000             | ,000  | ,000  | ,000  |
|                              | 2 första sjundedelen | ,000             | ,000  | ,000  | ,000  |

## Categorical Variables Codings

|                              |                      | Parameter coding |       |       |       |
|------------------------------|----------------------|------------------|-------|-------|-------|
|                              |                      | (8)              | (9)   | (10)  | (11)  |
| VASTY2 (SAIR*10000)+VASTY    | 403073101            | ,000             | ,000  | ,000  | ,000  |
|                              | 403073102            | ,000             | ,000  | ,000  | ,000  |
|                              | 403073103            | ,000             | ,000  | ,000  | ,000  |
|                              | 403073202            | ,000             | ,000  | ,000  | ,000  |
|                              | 403073203            | ,000             | ,000  | ,000  | ,000  |
|                              | 403073204            | ,000             | ,000  | ,000  | ,000  |
|                              | 403073303            | ,000             | ,000  | ,000  | ,000  |
|                              | 403073651            | ,000             | ,000  | ,000  | ,000  |
|                              | 403073771            | 1,000            | ,000  | ,000  | ,000  |
|                              | 403133102            | ,000             | 1,000 | ,000  | ,000  |
|                              | 403133106            | ,000             | ,000  | 1,000 | ,000  |
|                              | 403133107            | ,000             | ,000  | ,000  | 1,000 |
|                              | 403133109            | ,000             | ,000  | ,000  | ,000  |
|                              | 403133202            | ,000             | ,000  | ,000  | ,000  |
|                              | 403133203            | ,000             | ,000  | ,000  | ,000  |
|                              | 403133204            | ,000             | ,000  | ,000  | ,000  |
|                              | 403133315            | ,000             | ,000  | ,000  | ,000  |
|                              | 403133322            | ,000             | ,000  | ,000  | ,000  |
|                              | 403133401            | ,000             | ,000  | ,000  | ,000  |
|                              | 403133402            | ,000             | ,000  | ,000  | ,000  |
|                              | 403133550            | ,000             | ,000  | ,000  | ,000  |
|                              | 403133772            | ,000             | ,000  | ,000  | ,000  |
|                              | 403135803            | ,000             | ,000  | ,000  | ,000  |
|                              | 404060001            | ,000             | ,000  | ,000  | ,000  |
|                              | 404060002            | ,000             | ,000  | ,000  | ,000  |
|                              | 404310003            | ,000             | ,000  | ,000  | ,000  |
|                              | 404310004            | ,000             | ,000  | ,000  | ,000  |
|                              | 502300005            | ,000             | ,000  | ,000  | ,000  |
|                              | 502300006            | ,000             | ,000  | ,000  | ,000  |
|                              | 502300007            | ,000             | ,000  | ,000  | ,000  |
|                              | 502300214            | ,000             | ,000  | ,000  | ,000  |
|                              | 502300411            | ,000             | ,000  | ,000  | ,000  |
|                              | 502300415            | ,000             | ,000  | ,000  | ,000  |
|                              | 502300416            | ,000             | ,000  | ,000  | ,000  |
|                              | 502300811            | ,000             | ,000  | ,000  | ,000  |
|                              | 502300913            | ,000             | ,000  | ,000  | ,000  |
| sv7 sjättedelar för standard | 1 fjärde sjundedelen |                  |       |       |       |
|                              | 2 första sjundedelen |                  |       |       |       |

## Categorical Variables Codings

|                              |                      | Parameter coding |       |       |       |
|------------------------------|----------------------|------------------|-------|-------|-------|
|                              |                      | (12)             | (13)  | (14)  | (15)  |
| VASTY2 (SAIR*10000)+VASTY    | 403073101            | ,000             | ,000  | ,000  | ,000  |
|                              | 403073102            | ,000             | ,000  | ,000  | ,000  |
|                              | 403073103            | ,000             | ,000  | ,000  | ,000  |
|                              | 403073202            | ,000             | ,000  | ,000  | ,000  |
|                              | 403073203            | ,000             | ,000  | ,000  | ,000  |
|                              | 403073204            | ,000             | ,000  | ,000  | ,000  |
|                              | 403073303            | ,000             | ,000  | ,000  | ,000  |
|                              | 403073651            | ,000             | ,000  | ,000  | ,000  |
|                              | 403073771            | ,000             | ,000  | ,000  | ,000  |
|                              | 403133102            | ,000             | ,000  | ,000  | ,000  |
|                              | 403133106            | ,000             | ,000  | ,000  | ,000  |
|                              | 403133107            | ,000             | ,000  | ,000  | ,000  |
|                              | 403133109            | 1,000            | ,000  | ,000  | ,000  |
|                              | 403133202            | ,000             | 1,000 | ,000  | ,000  |
|                              | 403133203            | ,000             | ,000  | 1,000 | ,000  |
|                              | 403133204            | ,000             | ,000  | ,000  | 1,000 |
|                              | 403133315            | ,000             | ,000  | ,000  | ,000  |
|                              | 403133322            | ,000             | ,000  | ,000  | ,000  |
|                              | 403133401            | ,000             | ,000  | ,000  | ,000  |
|                              | 403133402            | ,000             | ,000  | ,000  | ,000  |
|                              | 403133550            | ,000             | ,000  | ,000  | ,000  |
|                              | 403133772            | ,000             | ,000  | ,000  | ,000  |
|                              | 403135803            | ,000             | ,000  | ,000  | ,000  |
|                              | 404060001            | ,000             | ,000  | ,000  | ,000  |
|                              | 404060002            | ,000             | ,000  | ,000  | ,000  |
|                              | 404310003            | ,000             | ,000  | ,000  | ,000  |
|                              | 404310004            | ,000             | ,000  | ,000  | ,000  |
|                              | 502300005            | ,000             | ,000  | ,000  | ,000  |
|                              | 502300006            | ,000             | ,000  | ,000  | ,000  |
|                              | 502300007            | ,000             | ,000  | ,000  | ,000  |
|                              | 502300214            | ,000             | ,000  | ,000  | ,000  |
|                              | 502300411            | ,000             | ,000  | ,000  | ,000  |
|                              | 502300415            | ,000             | ,000  | ,000  | ,000  |
|                              | 502300416            | ,000             | ,000  | ,000  | ,000  |
|                              | 502300811            | ,000             | ,000  | ,000  | ,000  |
|                              | 502300913            | ,000             | ,000  | ,000  | ,000  |
| sv7 sjättedelar för standard | 1 fjärde sjundedelen |                  |       |       |       |
|                              | 2 första sjundedelen |                  |       |       |       |

## Categorical Variables Codings

|                              |                      | Parameter coding |       |       |       |
|------------------------------|----------------------|------------------|-------|-------|-------|
|                              |                      | (16)             | (17)  | (18)  | (19)  |
| VASTY2 (SAIR*10000)+VASTY    | 403073101            | ,000             | ,000  | ,000  | ,000  |
|                              | 403073102            | ,000             | ,000  | ,000  | ,000  |
|                              | 403073103            | ,000             | ,000  | ,000  | ,000  |
|                              | 403073202            | ,000             | ,000  | ,000  | ,000  |
|                              | 403073203            | ,000             | ,000  | ,000  | ,000  |
|                              | 403073204            | ,000             | ,000  | ,000  | ,000  |
|                              | 403073303            | ,000             | ,000  | ,000  | ,000  |
|                              | 403073651            | ,000             | ,000  | ,000  | ,000  |
|                              | 403073771            | ,000             | ,000  | ,000  | ,000  |
|                              | 403133102            | ,000             | ,000  | ,000  | ,000  |
|                              | 403133106            | ,000             | ,000  | ,000  | ,000  |
|                              | 403133107            | ,000             | ,000  | ,000  | ,000  |
|                              | 403133109            | ,000             | ,000  | ,000  | ,000  |
|                              | 403133202            | ,000             | ,000  | ,000  | ,000  |
|                              | 403133203            | ,000             | ,000  | ,000  | ,000  |
|                              | 403133204            | ,000             | ,000  | ,000  | ,000  |
|                              | 403133315            | 1,000            | ,000  | ,000  | ,000  |
|                              | 403133322            | ,000             | 1,000 | ,000  | ,000  |
|                              | 403133401            | ,000             | ,000  | 1,000 | ,000  |
|                              | 403133402            | ,000             | ,000  | ,000  | 1,000 |
|                              | 403133550            | ,000             | ,000  | ,000  | ,000  |
|                              | 403133772            | ,000             | ,000  | ,000  | ,000  |
|                              | 403135803            | ,000             | ,000  | ,000  | ,000  |
|                              | 404060001            | ,000             | ,000  | ,000  | ,000  |
|                              | 404060002            | ,000             | ,000  | ,000  | ,000  |
|                              | 404310003            | ,000             | ,000  | ,000  | ,000  |
|                              | 404310004            | ,000             | ,000  | ,000  | ,000  |
|                              | 502300005            | ,000             | ,000  | ,000  | ,000  |
|                              | 502300006            | ,000             | ,000  | ,000  | ,000  |
|                              | 502300007            | ,000             | ,000  | ,000  | ,000  |
|                              | 502300214            | ,000             | ,000  | ,000  | ,000  |
|                              | 502300411            | ,000             | ,000  | ,000  | ,000  |
|                              | 502300415            | ,000             | ,000  | ,000  | ,000  |
|                              | 502300416            | ,000             | ,000  | ,000  | ,000  |
|                              | 502300811            | ,000             | ,000  | ,000  | ,000  |
|                              | 502300913            | ,000             | ,000  | ,000  | ,000  |
| sv7 sjättedelar för standard | 1 fjärde sjundedelen |                  |       |       |       |
|                              | 2 första sjundedelen |                  |       |       |       |

## Categorical Variables Codings

|                              |                      | Parameter coding |       |       |       |
|------------------------------|----------------------|------------------|-------|-------|-------|
|                              |                      | (20)             | (21)  | (22)  | (23)  |
| VASTY2 (SAIR*10000)+VASTY    | 403073101            | ,000             | ,000  | ,000  | ,000  |
|                              | 403073102            | ,000             | ,000  | ,000  | ,000  |
|                              | 403073103            | ,000             | ,000  | ,000  | ,000  |
|                              | 403073202            | ,000             | ,000  | ,000  | ,000  |
|                              | 403073203            | ,000             | ,000  | ,000  | ,000  |
|                              | 403073204            | ,000             | ,000  | ,000  | ,000  |
|                              | 403073303            | ,000             | ,000  | ,000  | ,000  |
|                              | 403073651            | ,000             | ,000  | ,000  | ,000  |
|                              | 403073771            | ,000             | ,000  | ,000  | ,000  |
|                              | 403133102            | ,000             | ,000  | ,000  | ,000  |
|                              | 403133106            | ,000             | ,000  | ,000  | ,000  |
|                              | 403133107            | ,000             | ,000  | ,000  | ,000  |
|                              | 403133109            | ,000             | ,000  | ,000  | ,000  |
|                              | 403133202            | ,000             | ,000  | ,000  | ,000  |
|                              | 403133203            | ,000             | ,000  | ,000  | ,000  |
|                              | 403133204            | ,000             | ,000  | ,000  | ,000  |
|                              | 403133315            | ,000             | ,000  | ,000  | ,000  |
|                              | 403133322            | ,000             | ,000  | ,000  | ,000  |
|                              | 403133401            | ,000             | ,000  | ,000  | ,000  |
|                              | 403133402            | ,000             | ,000  | ,000  | ,000  |
|                              | 403133550            | 1,000            | ,000  | ,000  | ,000  |
|                              | 403133772            | ,000             | 1,000 | ,000  | ,000  |
|                              | 403135803            | ,000             | ,000  | 1,000 | ,000  |
|                              | 404060001            | ,000             | ,000  | ,000  | 1,000 |
|                              | 404060002            | ,000             | ,000  | ,000  | ,000  |
|                              | 404310003            | ,000             | ,000  | ,000  | ,000  |
|                              | 404310004            | ,000             | ,000  | ,000  | ,000  |
|                              | 502300005            | ,000             | ,000  | ,000  | ,000  |
|                              | 502300006            | ,000             | ,000  | ,000  | ,000  |
|                              | 502300007            | ,000             | ,000  | ,000  | ,000  |
|                              | 502300214            | ,000             | ,000  | ,000  | ,000  |
|                              | 502300411            | ,000             | ,000  | ,000  | ,000  |
|                              | 502300415            | ,000             | ,000  | ,000  | ,000  |
|                              | 502300416            | ,000             | ,000  | ,000  | ,000  |
|                              | 502300811            | ,000             | ,000  | ,000  | ,000  |
|                              | 502300913            | ,000             | ,000  | ,000  | ,000  |
| sv7 sjättedelar för standard | 1 fjärde sjundedelen |                  |       |       |       |
|                              | 2 första sjundedelen |                  |       |       |       |

## Categorical Variables Codings

|                              |                      | Parameter coding |       |       |       |
|------------------------------|----------------------|------------------|-------|-------|-------|
|                              |                      | (24)             | (25)  | (26)  | (27)  |
| VASTY2 (SAIR*10000)+VASTY    | 403073101            | ,000             | ,000  | ,000  | ,000  |
|                              | 403073102            | ,000             | ,000  | ,000  | ,000  |
|                              | 403073103            | ,000             | ,000  | ,000  | ,000  |
|                              | 403073202            | ,000             | ,000  | ,000  | ,000  |
|                              | 403073203            | ,000             | ,000  | ,000  | ,000  |
|                              | 403073204            | ,000             | ,000  | ,000  | ,000  |
|                              | 403073303            | ,000             | ,000  | ,000  | ,000  |
|                              | 403073651            | ,000             | ,000  | ,000  | ,000  |
|                              | 403073771            | ,000             | ,000  | ,000  | ,000  |
|                              | 403133102            | ,000             | ,000  | ,000  | ,000  |
|                              | 403133106            | ,000             | ,000  | ,000  | ,000  |
|                              | 403133107            | ,000             | ,000  | ,000  | ,000  |
|                              | 403133109            | ,000             | ,000  | ,000  | ,000  |
|                              | 403133202            | ,000             | ,000  | ,000  | ,000  |
|                              | 403133203            | ,000             | ,000  | ,000  | ,000  |
|                              | 403133204            | ,000             | ,000  | ,000  | ,000  |
|                              | 403133315            | ,000             | ,000  | ,000  | ,000  |
|                              | 403133322            | ,000             | ,000  | ,000  | ,000  |
|                              | 403133401            | ,000             | ,000  | ,000  | ,000  |
|                              | 403133402            | ,000             | ,000  | ,000  | ,000  |
|                              | 403133550            | ,000             | ,000  | ,000  | ,000  |
|                              | 403133772            | ,000             | ,000  | ,000  | ,000  |
|                              | 403135803            | ,000             | ,000  | ,000  | ,000  |
|                              | 404060001            | ,000             | ,000  | ,000  | ,000  |
|                              | 404060002            | 1,000            | ,000  | ,000  | ,000  |
|                              | 404310003            | ,000             | 1,000 | ,000  | ,000  |
|                              | 404310004            | ,000             | ,000  | 1,000 | ,000  |
|                              | 502300005            | ,000             | ,000  | ,000  | 1,000 |
|                              | 502300006            | ,000             | ,000  | ,000  | ,000  |
|                              | 502300007            | ,000             | ,000  | ,000  | ,000  |
|                              | 502300214            | ,000             | ,000  | ,000  | ,000  |
|                              | 502300411            | ,000             | ,000  | ,000  | ,000  |
|                              | 502300415            | ,000             | ,000  | ,000  | ,000  |
|                              | 502300416            | ,000             | ,000  | ,000  | ,000  |
|                              | 502300811            | ,000             | ,000  | ,000  | ,000  |
|                              | 502300913            | ,000             | ,000  | ,000  | ,000  |
| sv7 sjättedelar för standard | 1 fjärde sjundedelen |                  |       |       |       |
|                              | 2 första sjundedelen |                  |       |       |       |

## Categorical Variables Codings

|                              |                      | Parameter coding |       |       |       |
|------------------------------|----------------------|------------------|-------|-------|-------|
|                              |                      | (28)             | (29)  | (30)  | (31)  |
| VASTY2 (SAIR*10000)+VASTY    | 403073101            | ,000             | ,000  | ,000  | ,000  |
|                              | 403073102            | ,000             | ,000  | ,000  | ,000  |
|                              | 403073103            | ,000             | ,000  | ,000  | ,000  |
|                              | 403073202            | ,000             | ,000  | ,000  | ,000  |
|                              | 403073203            | ,000             | ,000  | ,000  | ,000  |
|                              | 403073204            | ,000             | ,000  | ,000  | ,000  |
|                              | 403073303            | ,000             | ,000  | ,000  | ,000  |
|                              | 403073651            | ,000             | ,000  | ,000  | ,000  |
|                              | 403073771            | ,000             | ,000  | ,000  | ,000  |
|                              | 403133102            | ,000             | ,000  | ,000  | ,000  |
|                              | 403133106            | ,000             | ,000  | ,000  | ,000  |
|                              | 403133107            | ,000             | ,000  | ,000  | ,000  |
|                              | 403133109            | ,000             | ,000  | ,000  | ,000  |
|                              | 403133202            | ,000             | ,000  | ,000  | ,000  |
|                              | 403133203            | ,000             | ,000  | ,000  | ,000  |
|                              | 403133204            | ,000             | ,000  | ,000  | ,000  |
|                              | 403133315            | ,000             | ,000  | ,000  | ,000  |
|                              | 403133322            | ,000             | ,000  | ,000  | ,000  |
|                              | 403133401            | ,000             | ,000  | ,000  | ,000  |
|                              | 403133402            | ,000             | ,000  | ,000  | ,000  |
|                              | 403133550            | ,000             | ,000  | ,000  | ,000  |
|                              | 403133772            | ,000             | ,000  | ,000  | ,000  |
|                              | 403135803            | ,000             | ,000  | ,000  | ,000  |
|                              | 404060001            | ,000             | ,000  | ,000  | ,000  |
|                              | 404060002            | ,000             | ,000  | ,000  | ,000  |
|                              | 404310003            | ,000             | ,000  | ,000  | ,000  |
|                              | 404310004            | ,000             | ,000  | ,000  | ,000  |
|                              | 502300005            | ,000             | ,000  | ,000  | ,000  |
|                              | 502300006            | 1,000            | ,000  | ,000  | ,000  |
|                              | 502300007            | ,000             | 1,000 | ,000  | ,000  |
|                              | 502300214            | ,000             | ,000  | 1,000 | ,000  |
|                              | 502300411            | ,000             | ,000  | ,000  | 1,000 |
|                              | 502300415            | ,000             | ,000  | ,000  | ,000  |
|                              | 502300416            | ,000             | ,000  | ,000  | ,000  |
|                              | 502300811            | ,000             | ,000  | ,000  | ,000  |
|                              | 502300913            | ,000             | ,000  | ,000  | ,000  |
| sv7 sjättedelar för standard | 1 fjärde sjundedelen |                  |       |       |       |
|                              | 2 första sjundedelen |                  |       |       |       |



## Categorical Variables Codings

|                              |                      | Parameter coding |       |       |       |
|------------------------------|----------------------|------------------|-------|-------|-------|
|                              |                      | (32)             | (33)  | (34)  | (35)  |
| VASTY2 (SAIR*10000)+VASTY    | 403073101            | ,000             | ,000  | ,000  | ,000  |
|                              | 403073102            | ,000             | ,000  | ,000  | ,000  |
|                              | 403073103            | ,000             | ,000  | ,000  | ,000  |
|                              | 403073202            | ,000             | ,000  | ,000  | ,000  |
|                              | 403073203            | ,000             | ,000  | ,000  | ,000  |
|                              | 403073204            | ,000             | ,000  | ,000  | ,000  |
|                              | 403073303            | ,000             | ,000  | ,000  | ,000  |
|                              | 403073651            | ,000             | ,000  | ,000  | ,000  |
|                              | 403073771            | ,000             | ,000  | ,000  | ,000  |
|                              | 403133102            | ,000             | ,000  | ,000  | ,000  |
|                              | 403133106            | ,000             | ,000  | ,000  | ,000  |
|                              | 403133107            | ,000             | ,000  | ,000  | ,000  |
|                              | 403133109            | ,000             | ,000  | ,000  | ,000  |
|                              | 403133202            | ,000             | ,000  | ,000  | ,000  |
|                              | 403133203            | ,000             | ,000  | ,000  | ,000  |
|                              | 403133204            | ,000             | ,000  | ,000  | ,000  |
|                              | 403133315            | ,000             | ,000  | ,000  | ,000  |
|                              | 403133322            | ,000             | ,000  | ,000  | ,000  |
|                              | 403133401            | ,000             | ,000  | ,000  | ,000  |
|                              | 403133402            | ,000             | ,000  | ,000  | ,000  |
|                              | 403133550            | ,000             | ,000  | ,000  | ,000  |
|                              | 403133772            | ,000             | ,000  | ,000  | ,000  |
|                              | 403135803            | ,000             | ,000  | ,000  | ,000  |
|                              | 404060001            | ,000             | ,000  | ,000  | ,000  |
|                              | 404060002            | ,000             | ,000  | ,000  | ,000  |
|                              | 404310003            | ,000             | ,000  | ,000  | ,000  |
|                              | 404310004            | ,000             | ,000  | ,000  | ,000  |
|                              | 502300005            | ,000             | ,000  | ,000  | ,000  |
|                              | 502300006            | ,000             | ,000  | ,000  | ,000  |
|                              | 502300007            | ,000             | ,000  | ,000  | ,000  |
|                              | 502300214            | ,000             | ,000  | ,000  | ,000  |
|                              | 502300411            | ,000             | ,000  | ,000  | ,000  |
|                              | 502300415            | 1,000            | ,000  | ,000  | ,000  |
|                              | 502300416            | ,000             | 1,000 | ,000  | ,000  |
|                              | 502300811            | ,000             | ,000  | 1,000 | ,000  |
|                              | 502300913            | ,000             | ,000  | ,000  | 1,000 |
| sv7 sjättedelar för standard | 1 fjärde sjundedelen |                  |       |       |       |
|                              | 2 första sjundedelen |                  |       |       |       |

## Categorical Variables Codings

|                      | Frequency | Parameter coding |       |       |
|----------------------|-----------|------------------|-------|-------|
|                      |           | (1)              | (2)   | (3)   |
| 3 andra sjundedelen  | 1238      | ,000             | 1,000 | ,000  |
| 4 tredje sjundedelen | 1255      | ,000             | ,000  | 1,000 |
| 5 femte sjundedelen  | 1445      | ,000             | ,000  | ,000  |
| 6 sjätte sjundedelen | 1948      | ,000             | ,000  | ,000  |
| 7 sjunde sjundedelen | 2135      | ,000             | ,000  | ,000  |

## Categorical Variables Codings

|                      | Frequency | Parameter coding |       |      |     |
|----------------------|-----------|------------------|-------|------|-----|
|                      |           | (4)              | (5)   | (6)  | (7) |
| 3 andra sjundedelen  | ,000      | ,000             | ,000  | ,000 |     |
| 4 tredje sjundedelen | ,000      | ,000             | ,000  | ,000 |     |
| 5 femte sjundedelen  | 1,000     | ,000             | ,000  | ,000 |     |
| 6 sjätte sjundedelen | ,000      | 1,000            | ,000  | ,000 |     |
| 7 sjunde sjundedelen | ,000      | ,000             | 1,000 | ,000 |     |

## Categorical Variables Codings

|                      | Frequency | Parameter coding |     |      |      |
|----------------------|-----------|------------------|-----|------|------|
|                      |           | (8)              | (9) | (10) | (11) |
| 3 andra sjundedelen  |           |                  |     |      |      |
| 4 tredje sjundedelen |           |                  |     |      |      |
| 5 femte sjundedelen  |           |                  |     |      |      |
| 6 sjätte sjundedelen |           |                  |     |      |      |
| 7 sjunde sjundedelen |           |                  |     |      |      |

## Categorical Variables Codings

|                      | Frequency | Parameter coding |      |      |      |
|----------------------|-----------|------------------|------|------|------|
|                      |           | (12)             | (13) | (14) | (15) |
| 3 andra sjundedelen  |           |                  |      |      |      |
| 4 tredje sjundedelen |           |                  |      |      |      |
| 5 femte sjundedelen  |           |                  |      |      |      |
| 6 sjätte sjundedelen |           |                  |      |      |      |
| 7 sjunde sjundedelen |           |                  |      |      |      |

## Categorical Variables Codings

|                      | Frequency | Parameter coding |      |      |      |
|----------------------|-----------|------------------|------|------|------|
|                      |           | (16)             | (17) | (18) | (19) |
| 3 andra sjundedelen  |           |                  |      |      |      |
| 4 tredje sjundedelen |           |                  |      |      |      |
| 5 femte sjundedelen  |           |                  |      |      |      |
| 6 sjätte sjundedelen |           |                  |      |      |      |
| 7 sjunde sjundedelen |           |                  |      |      |      |

**Categorical Variables Codings**

|                      | Parameter coding |      |      |      |
|----------------------|------------------|------|------|------|
|                      | (20)             | (21) | (22) | (23) |
| 3 andra sjundedelen  |                  |      |      |      |
| 4 tredje sjundedelen |                  |      |      |      |
| 5 femte sjundedelen  |                  |      |      |      |
| 6 sjätte sjundedelen |                  |      |      |      |
| 7 sjunde sjundedelen |                  |      |      |      |

**Categorical Variables Codings**

|                      | Parameter coding |      |      |      |
|----------------------|------------------|------|------|------|
|                      | (24)             | (25) | (26) | (27) |
| 3 andra sjundedelen  |                  |      |      |      |
| 4 tredje sjundedelen |                  |      |      |      |
| 5 femte sjundedelen  |                  |      |      |      |
| 6 sjätte sjundedelen |                  |      |      |      |
| 7 sjunde sjundedelen |                  |      |      |      |

**Categorical Variables Codings**

|                      | Parameter coding |      |      |      |
|----------------------|------------------|------|------|------|
|                      | (28)             | (29) | (30) | (31) |
| 3 andra sjundedelen  |                  |      |      |      |
| 4 tredje sjundedelen |                  |      |      |      |
| 5 femte sjundedelen  |                  |      |      |      |
| 6 sjätte sjundedelen |                  |      |      |      |
| 7 sjunde sjundedelen |                  |      |      |      |

**Categorical Variables Codings**

|                      | Parameter coding |      |      |      |
|----------------------|------------------|------|------|------|
|                      | (32)             | (33) | (34) | (35) |
| 3 andra sjundedelen  |                  |      |      |      |
| 4 tredje sjundedelen |                  |      |      |      |
| 5 femte sjundedelen  |                  |      |      |      |
| 6 sjätte sjundedelen |                  |      |      |      |
| 7 sjunde sjundedelen |                  |      |      |      |

**Block 0: Beginning Block**

Classification Table<sup>a,b</sup>

| Observed           |                                                |                                                              |
|--------------------|------------------------------------------------|--------------------------------------------------------------|
| Step 0             | luonnelt1 luonne highest = tapahtui potilaalle | 0 ingen händelse eller läheltä piti<br>1 tapahtui potilaalle |
| Overall Percentage |                                                |                                                              |

Classification Table<sup>a,b</sup>

| Observed           |                                                |                                                              | Predicted                           |
|--------------------|------------------------------------------------|--------------------------------------------------------------|-------------------------------------|
|                    |                                                |                                                              | luonnelt1 luonne highest = ...      |
|                    |                                                |                                                              | 0 ingen händelse eller läheltä piti |
| Step 0             | luonnelt1 luonne highest = tapahtui potilaalle | 0 ingen händelse eller läheltä piti<br>1 tapahtui potilaalle | 11627<br>848                        |
| Overall Percentage |                                                |                                                              |                                     |

Classification Table<sup>a,b</sup>

| Observed           |                                                |                                                              | Predicted                    |
|--------------------|------------------------------------------------|--------------------------------------------------------------|------------------------------|
|                    |                                                |                                                              | luonnelt1 luonne highest ... |
|                    |                                                |                                                              | 1 tapahtui potilaalle        |
| Step 0             | luonnelt1 luonne highest = tapahtui potilaalle | 0 ingen händelse eller läheltä piti<br>1 tapahtui potilaalle | 0<br>0                       |
| Overall Percentage |                                                |                                                              |                              |

Classification Table<sup>a,b</sup>

| Observed           |                                                |                                                              | Predicted          |
|--------------------|------------------------------------------------|--------------------------------------------------------------|--------------------|
|                    |                                                |                                                              | Percentage Correct |
| Step 0             | luonnelt1 luonne highest = tapahtui potilaalle | 0 ingen händelse eller läheltä piti<br>1 tapahtui potilaalle | 100,0<br>,0        |
| Overall Percentage |                                                |                                                              | 93,2               |

a. Constant is included in the model.

b. The cut value is ,500

## Variables in the Equation

|                 | B      | S.E. | Wald     | df | Sig. | Exp(B) |
|-----------------|--------|------|----------|----|------|--------|
| Step 0 Constant | -2,618 | ,036 | 5417,889 | 1  | ,000 | ,073   |

## Variables not in the Equation

|                      | Score   | df | Sig. |
|----------------------|---------|----|------|
| Step 0 Variables sv7 | 19,201  | 6  | ,004 |
| sv7(1)               | 13,339  | 1  | ,000 |
| sv7(2)               | ,536    | 1  | ,464 |
| sv7(3)               | ,394    | 1  | ,530 |
| sv7(4)               | ,282    | 1  | ,596 |
| sv7(5)               | 5,803   | 1  | ,016 |
| sv7(6)               | 2,849   | 1  | ,091 |
| VASTY2               | 299,491 | 35 | ,000 |
| VASTY2(1)            | ,007    | 1  | ,934 |
| VASTY2(2)            | 8,968   | 1  | ,003 |
| VASTY2(3)            | 15,764  | 1  | ,000 |
| VASTY2(4)            | ,453    | 1  | ,501 |
| VASTY2(5)            | ,965    | 1  | ,326 |
| VASTY2(6)            | 14,062  | 1  | ,000 |
| VASTY2(7)            | 12,067  | 1  | ,001 |
| VASTY2(8)            | 1,504   | 1  | ,220 |
| VASTY2(9)            | 1,612   | 1  | ,204 |
| VASTY2(10)           | 55,161  | 1  | ,000 |
| VASTY2(11)           | 11,675  | 1  | ,001 |
| VASTY2(12)           | ,213    | 1  | ,644 |
| VASTY2(13)           | 55,161  | 1  | ,000 |
| VASTY2(14)           | 1,504   | 1  | ,220 |
| VASTY2(15)           | 1,199   | 1  | ,273 |
| VASTY2(16)           | 3,222   | 1  | ,073 |
| VASTY2(17)           | 12,590  | 1  | ,000 |
| VASTY2(18)           | 7,137   | 1  | ,008 |
| VASTY2(19)           | 19,294  | 1  | ,000 |
| VASTY2(20)           | ,030    | 1  | ,863 |
| VASTY2(21)           | ,647    | 1  | ,421 |
| VASTY2(22)           | ,782    | 1  | ,377 |
| VASTY2(23)           | 1,199   | 1  | ,273 |
| VASTY2(24)           | 2,253   | 1  | ,133 |
| VASTY2(25)           | 1,513   | 1  | ,219 |
| VASTY2(26)           | 7,708   | 1  | ,005 |
| VASTY2(27)           | 15,836  | 1  | ,000 |
| VASTY2(28)           | 6,172   | 1  | ,013 |
| VASTY2(29)           | 11,203  | 1  | ,001 |
| VASTY2(30)           | 1,058   | 1  | ,304 |
| VASTY2(31)           | 6,527   | 1  | ,011 |

## Variables not in the Equation

|                    | Score   | df | Sig. |
|--------------------|---------|----|------|
| VASTY2(32)         | ,544    | 1  | ,461 |
| VASTY2(33)         | ,126    | 1  | ,723 |
| VASTY2(34)         | 14,062  | 1  | ,000 |
| VASTY2(35)         | 15,901  | 1  | ,000 |
| Overall Statistics | 308,179 | 41 | ,000 |

## Block 1: Method = Enter

## Omnibus Tests of Model Coefficients

|             | Chi-square | df | Sig. |
|-------------|------------|----|------|
| Step 1 Step | 315,273    | 41 | ,000 |
| Block       | 315,273    | 41 | ,000 |
| Model       | 315,273    | 41 | ,000 |

## Model Summary

| Step | -2 Log likelihood     | Cox & Snell R Square | Nagelkerke R Square |
|------|-----------------------|----------------------|---------------------|
| 1    | 5881,599 <sup>a</sup> | ,025                 | ,064                |

a. Estimation terminated at iteration number 7 because parameter estimates changed by less than ,001.

Classification Table<sup>a</sup>

| Observed           |                                                | Predicted                           |                       |
|--------------------|------------------------------------------------|-------------------------------------|-----------------------|
| Step 1             | luonnelt1 luonne highest = tapahtui potilaalle | 0 ingen händelse eller läheltä piti | 1 tapahtui potilaalle |
| Overall Percentage |                                                |                                     |                       |

Classification Table<sup>a</sup>

| Observed           |                                                | Predicted                           |       |
|--------------------|------------------------------------------------|-------------------------------------|-------|
| Step 1             | luonnelt1 luonne highest = tapahtui potilaalle | 0 ingen händelse eller läheltä piti | 11627 |
| Overall Percentage |                                                | 1 tapahtui potilaalle               | 848   |

Classification Table<sup>a</sup>

| Observed           |                                                | Predicted                           |                          |
|--------------------|------------------------------------------------|-------------------------------------|--------------------------|
|                    |                                                | luonnelt1<br>luonne highest ...     | 1 tapahtui<br>potilaalle |
| Step 1             | luonnelt1 luonne highest = tapahtui potilaalle | 0 ingen händelse eller läheltä piti | 0                        |
|                    |                                                | 1 tapahtui potilaalle               | 0                        |
| Overall Percentage |                                                |                                     |                          |

Classification Table<sup>a</sup>

| Observed           |                                                | Predicted                           |       |
|--------------------|------------------------------------------------|-------------------------------------|-------|
|                    |                                                | Percentage<br>Correct               |       |
| Step 1             | luonnelt1 luonne highest = tapahtui potilaalle | 0 ingen händelse eller läheltä piti | 100,0 |
|                    |                                                | 1 tapahtui potilaalle               | ,0    |
| Overall Percentage |                                                |                                     | 93,2  |

a. The cut value is ,500

## Variables in the Equation

|                         | B      | S.E. | Wald    | df | Sig. | Exp(B) |
|-------------------------|--------|------|---------|----|------|--------|
| Step 1 <sup>a</sup> sv7 |        |      | 8,031   | 6  | ,236 |        |
| sv7(1)                  | -,244  | ,152 | 2,596   | 1  | ,107 | ,783   |
| sv7(2)                  | -,090  | ,158 | ,327    | 1  | ,567 | ,914   |
| sv7(3)                  | -,111  | ,156 | ,507    | 1  | ,477 | ,895   |
| sv7(4)                  | -,060  | ,146 | ,168    | 1  | ,682 | ,942   |
| sv7(5)                  | -,014  | ,138 | ,010    | 1  | ,921 | ,986   |
| sv7(6)                  | ,204   | ,153 | 1,765   | 1  | ,184 | 1,226  |
| VASTY2                  |        |      | 232,195 | 35 | ,000 |        |
| VASTY2(1)               | ,068   | ,300 | ,051    | 1  | ,821 | 1,070  |
| VASTY2(2)               | ,447   | ,281 | 2,537   | 1  | ,111 | 1,564  |
| VASTY2(3)               | -1,383 | ,465 | 8,849   | 1  | ,003 | ,251   |
| VASTY2(4)               | ,225   | ,292 | ,592    | 1  | ,442 | 1,252  |
| VASTY2(5)               | -,099  | ,326 | ,092    | 1  | ,761 | ,906   |
| VASTY2(6)               | -1,447 | ,449 | 10,396  | 1  | ,001 | ,235   |
| VASTY2(7)               | ,661   | ,272 | 5,890   | 1  | ,015 | 1,936  |
| VASTY2(8)               | -,178  | ,321 | ,308    | 1  | ,579 | ,837   |
| VASTY2(9)               | ,323   | ,290 | 1,240   | 1  | ,266 | 1,381  |
| VASTY2(10)              | ,921   | ,267 | 11,865  | 1  | ,001 | 2,511  |
| VASTY2(11)              | ,640   | ,272 | 5,515   | 1  | ,019 | 1,896  |
| VASTY2(12)              | ,077   | ,298 | ,066    | 1  | ,797 | 1,080  |
| VASTY2(13)              | ,913   | ,268 | 11,580  | 1  | ,001 | 2,491  |
| VASTY2(14)              | -,287  | ,322 | ,794    | 1  | ,373 | ,750   |
| VASTY2(15)              | ,164   | ,294 | ,310    | 1  | ,577 | 1,178  |
| VASTY2(16)              | ,467   | ,332 | 1,983   | 1  | ,159 | 1,596  |
| VASTY2(17)              | -1,077 | ,418 | 6,623   | 1  | ,010 | ,341   |
| VASTY2(18)              | -,507  | ,378 | 1,795   | 1  | ,180 | ,602   |
| VASTY2(19)              | -1,627 | ,558 | 8,509   | 1  | ,004 | ,196   |
| VASTY2(20)              | ,016   | ,317 | ,002    | 1  | ,960 | 1,016  |
| VASTY2(21)              | -,072  | ,312 | ,053    | 1  | ,817 | ,931   |
| VASTY2(22)              | ,247   | ,290 | ,728    | 1  | ,393 | 1,280  |
| VASTY2(23)              | ,303   | ,288 | 1,108   | 1  | ,293 | 1,354  |
| VASTY2(24)              | ,302   | ,285 | 1,123   | 1  | ,289 | 1,353  |
| VASTY2(25)              | ,369   | ,302 | 1,499   | 1  | ,221 | 1,447  |
| VASTY2(26)              | -,878  | ,419 | 4,400   | 1  | ,036 | ,416   |
| VASTY2(27)              | -1,506 | ,468 | 10,348  | 1  | ,001 | ,222   |
| VASTY2(28)              | -1,152 | ,480 | 5,766   | 1  | ,016 | ,316   |
| VASTY2(29)              | -1,245 | ,417 | 8,931   | 1  | ,003 | ,288   |
| VASTY2(30)              | -,114  | ,316 | ,130    | 1  | ,718 | ,892   |
| VASTY2(31)              | ,641   | ,287 | 4,983   | 1  | ,026 | 1,899  |
| VASTY2(32)              | ,084   | ,328 | ,066    | 1  | ,797 | 1,088  |
| VASTY2(33)              | ,182   | ,324 | ,314    | 1  | ,575 | 1,199  |
| VASTY2(34)              | -1,234 | ,438 | 7,924   | 1  | ,005 | ,291   |



Variables in the Equation

|                     |            | 95% C.I.for EXP(B) |       |
|---------------------|------------|--------------------|-------|
|                     |            | Lower              | Upper |
| Step 1 <sup>a</sup> | sv7        |                    |       |
|                     | sv7(1)     | ,582               | 1,054 |
|                     | sv7(2)     | ,671               | 1,245 |
|                     | sv7(3)     | ,659               | 1,215 |
|                     | sv7(4)     | ,707               | 1,255 |
|                     | sv7(5)     | ,752               | 1,293 |
|                     | sv7(6)     | ,908               | 1,655 |
|                     | VASTY2     |                    |       |
|                     | VASTY2(1)  | ,594               | 1,928 |
|                     | VASTY2(2)  | ,902               | 2,712 |
|                     | VASTY2(3)  | ,101               | ,624  |
|                     | VASTY2(4)  | ,706               | 2,221 |
|                     | VASTY2(5)  | ,478               | 1,717 |
|                     | VASTY2(6)  | ,098               | ,567  |
|                     | VASTY2(7)  | 1,135              | 3,300 |
|                     | VASTY2(8)  | ,447               | 1,569 |
|                     | VASTY2(9)  | ,782               | 2,440 |
|                     | VASTY2(10) | 1,487              | 4,240 |
|                     | VASTY2(11) | 1,112              | 3,233 |
|                     | VASTY2(12) | ,602               | 1,935 |
|                     | VASTY2(13) | 1,472              | 4,213 |
|                     | VASTY2(14) | ,399               | 1,411 |
|                     | VASTY2(15) | ,662               | 2,096 |
|                     | VASTY2(16) | ,833               | 3,059 |
|                     | VASTY2(17) | ,150               | ,774  |
|                     | VASTY2(18) | ,287               | 1,264 |
|                     | VASTY2(19) | ,066               | ,586  |
|                     | VASTY2(20) | ,546               | 1,890 |
|                     | VASTY2(21) | ,505               | 1,715 |
|                     | VASTY2(22) | ,726               | 2,259 |
|                     | VASTY2(23) | ,770               | 2,381 |
|                     | VASTY2(24) | ,774               | 2,367 |
|                     | VASTY2(25) | ,801               | 2,613 |
|                     | VASTY2(26) | ,183               | ,944  |
|                     | VASTY2(27) | ,089               | ,555  |
|                     | VASTY2(28) | ,123               | ,809  |
|                     | VASTY2(29) | ,127               | ,651  |
|                     | VASTY2(30) | ,480               | 1,659 |
|                     | VASTY2(31) | 1,081              | 3,334 |
|                     | VASTY2(32) | ,572               | 2,069 |
|                     | VASTY2(33) | ,636               | 2,263 |
|                     | VASTY2(34) | ,123               | ,687  |

review only

## Variables in the Equation

|            | B      | S.E. | Wald    | df | Sig. | Exp(B) |
|------------|--------|------|---------|----|------|--------|
| VASTY2(35) | ,739   | ,277 | 7,138   | 1  | ,008 | 2,094  |
| Constant   | -2,631 | ,233 | 127,277 | 1  | ,000 | ,072   |

## Variables in the Equation

|            | 95% C.I. for EXP(B) |       |
|------------|---------------------|-------|
|            | Lower               | Upper |
| VASTY2(35) | 1,218               | 3,600 |
| Constant   |                     |       |

a. Variable(s) entered on step 1: sv7, VASTY2.

\*\*

LOGISTIC REGRESSION VARIABLES seurauslt3

/METHOD=ENTER bv1 VASTY2

/CONTRAST (bv1)=Indicator(1)

/CONTRAST (VASTY2)=Indicator(1)

/PRINT=CI(95)

/CRITERIA=PIN(0.05) POUT(0.10) ITERATE(20) CUT(0.5).

## Logistic Regression

[DataSet6] C:\cWordjan\Rafaela\_VCS\alla\_tillsammans\abo\_bjo\_vasa\_v1.sav

### Case Processing Summary

| Unweighted Cases <sup>a</sup> |                      | N     | Percent |
|-------------------------------|----------------------|-------|---------|
| Selected Cases                | Included in Analysis | 12475 | 100,0   |
|                               | Missing Cases        | 0     | ,0      |
|                               | Total                | 12475 | 100,0   |
| Unselected Cases              |                      | 0     | ,0      |
| Total                         |                      | 12475 | 100,0   |

a. If weight is in effect, see classification table for the total number of cases.

### Dependent Variable Encoding

| Original Value                    | Internal Value |
|-----------------------------------|----------------|
| 0 ingen händelse eller ei haittaa | 0              |
| 1 haitta (i någon form)           | 1              |

## Categorical Variables Codings

|                                             | Frequency | Parameter coding |       |       |
|---------------------------------------------|-----------|------------------|-------|-------|
|                                             |           | (1)              | (2)   | (3)   |
| VASTY2 (SAIR*10000)+VASTY 403073101         | 365       | ,000             | ,000  | ,000  |
| 403073102                                   | 362       | 1,000            | ,000  | ,000  |
| 403073103                                   | 365       | ,000             | 1,000 | ,000  |
| 403073202                                   | 365       | ,000             | ,000  | 1,000 |
| 403073203                                   | 365       | ,000             | ,000  | ,000  |
| 403073204                                   | 330       | ,000             | ,000  | ,000  |
| 403073303                                   | 364       | ,000             | ,000  | ,000  |
| 403073651                                   | 362       | ,000             | ,000  | ,000  |
| 403073771                                   | 365       | ,000             | ,000  | ,000  |
| 403133102                                   | 341       | ,000             | ,000  | ,000  |
| 403133106                                   | 365       | ,000             | ,000  | ,000  |
| 403133107                                   | 365       | ,000             | ,000  | ,000  |
| 403133109                                   | 365       | ,000             | ,000  | ,000  |
| 403133202                                   | 365       | ,000             | ,000  | ,000  |
| 403133203                                   | 365       | ,000             | ,000  | ,000  |
| 403133204                                   | 365       | ,000             | ,000  | ,000  |
| 403133315                                   | 177       | ,000             | ,000  | ,000  |
| 403133322                                   | 365       | ,000             | ,000  | ,000  |
| 403133401                                   | 362       | ,000             | ,000  | ,000  |
| 403133402                                   | 365       | ,000             | ,000  | ,000  |
| 403133550                                   | 298       | ,000             | ,000  | ,000  |
| 403133772                                   | 365       | ,000             | ,000  | ,000  |
| 403135803                                   | 365       | ,000             | ,000  | ,000  |
| 404060001                                   | 365       | ,000             | ,000  | ,000  |
| 404060002                                   | 366       | ,000             | ,000  | ,000  |
| 404310003                                   | 291       | ,000             | ,000  | ,000  |
| 404310004                                   | 291       | ,000             | ,000  | ,000  |
| 502300005                                   | 366       | ,000             | ,000  | ,000  |
| 502300006                                   | 225       | ,000             | ,000  | ,000  |
| 502300007                                   | 366       | ,000             | ,000  | ,000  |
| 502300214                                   | 366       | ,000             | ,000  | ,000  |
| 502300411                                   | 366       | ,000             | ,000  | ,000  |
| 502300415                                   | 360       | ,000             | ,000  | ,000  |
| 502300416                                   | 363       | ,000             | ,000  | ,000  |
| 502300811                                   | 364       | ,000             | ,000  | ,000  |
| 502300913                                   | 315       | ,000             | ,000  | ,000  |
| bv1 belastning vs paencil 1 medelbelastning | 5380      | ,000             | ,000  |       |
| 2 underbelastning                           | 3222      | 1,000            | ,000  |       |
| 3 överbelastning                            | 3873      | ,000             | 1,000 |       |

## Categorical Variables Codings

|                           |                   | Parameter coding |       |       |       |
|---------------------------|-------------------|------------------|-------|-------|-------|
|                           |                   | (4)              | (5)   | (6)   | (7)   |
| VASTY2 (SAIR*10000)+VASTY | 403073101         | ,000             | ,000  | ,000  | ,000  |
|                           | 403073102         | ,000             | ,000  | ,000  | ,000  |
|                           | 403073103         | ,000             | ,000  | ,000  | ,000  |
|                           | 403073202         | ,000             | ,000  | ,000  | ,000  |
|                           | 403073203         | 1,000            | ,000  | ,000  | ,000  |
|                           | 403073204         | ,000             | 1,000 | ,000  | ,000  |
|                           | 403073303         | ,000             | ,000  | 1,000 | ,000  |
|                           | 403073651         | ,000             | ,000  | ,000  | 1,000 |
|                           | 403073771         | ,000             | ,000  | ,000  | ,000  |
|                           | 403133102         | ,000             | ,000  | ,000  | ,000  |
|                           | 403133106         | ,000             | ,000  | ,000  | ,000  |
|                           | 403133107         | ,000             | ,000  | ,000  | ,000  |
|                           | 403133109         | ,000             | ,000  | ,000  | ,000  |
|                           | 403133202         | ,000             | ,000  | ,000  | ,000  |
|                           | 403133203         | ,000             | ,000  | ,000  | ,000  |
|                           | 403133204         | ,000             | ,000  | ,000  | ,000  |
|                           | 403133315         | ,000             | ,000  | ,000  | ,000  |
|                           | 403133322         | ,000             | ,000  | ,000  | ,000  |
|                           | 403133401         | ,000             | ,000  | ,000  | ,000  |
|                           | 403133402         | ,000             | ,000  | ,000  | ,000  |
|                           | 403133550         | ,000             | ,000  | ,000  | ,000  |
|                           | 403133772         | ,000             | ,000  | ,000  | ,000  |
|                           | 403135803         | ,000             | ,000  | ,000  | ,000  |
|                           | 404060001         | ,000             | ,000  | ,000  | ,000  |
|                           | 404060002         | ,000             | ,000  | ,000  | ,000  |
|                           | 404310003         | ,000             | ,000  | ,000  | ,000  |
|                           | 404310004         | ,000             | ,000  | ,000  | ,000  |
|                           | 502300005         | ,000             | ,000  | ,000  | ,000  |
|                           | 502300006         | ,000             | ,000  | ,000  | ,000  |
|                           | 502300007         | ,000             | ,000  | ,000  | ,000  |
|                           | 502300214         | ,000             | ,000  | ,000  | ,000  |
|                           | 502300411         | ,000             | ,000  | ,000  | ,000  |
|                           | 502300415         | ,000             | ,000  | ,000  | ,000  |
|                           | 502300416         | ,000             | ,000  | ,000  | ,000  |
|                           | 502300811         | ,000             | ,000  | ,000  | ,000  |
|                           | 502300913         | ,000             | ,000  | ,000  | ,000  |
| bv1 belastning vs paencil | 1 medelbelastning |                  |       |       |       |
|                           | 2 underbelastning |                  |       |       |       |
|                           | 3 överbelastning  |                  |       |       |       |

## Categorical Variables Codings

|                           |                   | Parameter coding |       |       |       |
|---------------------------|-------------------|------------------|-------|-------|-------|
|                           |                   | (8)              | (9)   | (10)  | (11)  |
| VASTY2 (SAIR*10000)+VASTY | 403073101         | ,000             | ,000  | ,000  | ,000  |
|                           | 403073102         | ,000             | ,000  | ,000  | ,000  |
|                           | 403073103         | ,000             | ,000  | ,000  | ,000  |
|                           | 403073202         | ,000             | ,000  | ,000  | ,000  |
|                           | 403073203         | ,000             | ,000  | ,000  | ,000  |
|                           | 403073204         | ,000             | ,000  | ,000  | ,000  |
|                           | 403073303         | ,000             | ,000  | ,000  | ,000  |
|                           | 403073651         | ,000             | ,000  | ,000  | ,000  |
|                           | 403073771         | 1,000            | ,000  | ,000  | ,000  |
|                           | 403133102         | ,000             | 1,000 | ,000  | ,000  |
|                           | 403133106         | ,000             | ,000  | 1,000 | ,000  |
|                           | 403133107         | ,000             | ,000  | ,000  | 1,000 |
|                           | 403133109         | ,000             | ,000  | ,000  | ,000  |
|                           | 403133202         | ,000             | ,000  | ,000  | ,000  |
|                           | 403133203         | ,000             | ,000  | ,000  | ,000  |
|                           | 403133204         | ,000             | ,000  | ,000  | ,000  |
|                           | 403133315         | ,000             | ,000  | ,000  | ,000  |
|                           | 403133322         | ,000             | ,000  | ,000  | ,000  |
|                           | 403133401         | ,000             | ,000  | ,000  | ,000  |
|                           | 403133402         | ,000             | ,000  | ,000  | ,000  |
|                           | 403133550         | ,000             | ,000  | ,000  | ,000  |
|                           | 403133772         | ,000             | ,000  | ,000  | ,000  |
|                           | 403135803         | ,000             | ,000  | ,000  | ,000  |
|                           | 404060001         | ,000             | ,000  | ,000  | ,000  |
|                           | 404060002         | ,000             | ,000  | ,000  | ,000  |
|                           | 404310003         | ,000             | ,000  | ,000  | ,000  |
|                           | 404310004         | ,000             | ,000  | ,000  | ,000  |
|                           | 502300005         | ,000             | ,000  | ,000  | ,000  |
|                           | 502300006         | ,000             | ,000  | ,000  | ,000  |
|                           | 502300007         | ,000             | ,000  | ,000  | ,000  |
|                           | 502300214         | ,000             | ,000  | ,000  | ,000  |
|                           | 502300411         | ,000             | ,000  | ,000  | ,000  |
|                           | 502300415         | ,000             | ,000  | ,000  | ,000  |
|                           | 502300416         | ,000             | ,000  | ,000  | ,000  |
|                           | 502300811         | ,000             | ,000  | ,000  | ,000  |
|                           | 502300913         | ,000             | ,000  | ,000  | ,000  |
| bv1 belastning vs paencil | 1 medelbelastning |                  |       |       |       |
|                           | 2 underbelastning |                  |       |       |       |
|                           | 3 överbelastning  |                  |       |       |       |

## Categorical Variables Codings

|                           |                   | Parameter coding |       |       |       |
|---------------------------|-------------------|------------------|-------|-------|-------|
|                           |                   | (12)             | (13)  | (14)  | (15)  |
| VASTY2 (SAIR*10000)+VASTY | 403073101         | ,000             | ,000  | ,000  | ,000  |
|                           | 403073102         | ,000             | ,000  | ,000  | ,000  |
|                           | 403073103         | ,000             | ,000  | ,000  | ,000  |
|                           | 403073202         | ,000             | ,000  | ,000  | ,000  |
|                           | 403073203         | ,000             | ,000  | ,000  | ,000  |
|                           | 403073204         | ,000             | ,000  | ,000  | ,000  |
|                           | 403073303         | ,000             | ,000  | ,000  | ,000  |
|                           | 403073651         | ,000             | ,000  | ,000  | ,000  |
|                           | 403073771         | ,000             | ,000  | ,000  | ,000  |
|                           | 403133102         | ,000             | ,000  | ,000  | ,000  |
|                           | 403133106         | ,000             | ,000  | ,000  | ,000  |
|                           | 403133107         | ,000             | ,000  | ,000  | ,000  |
|                           | 403133109         | 1,000            | ,000  | ,000  | ,000  |
|                           | 403133202         | ,000             | 1,000 | ,000  | ,000  |
|                           | 403133203         | ,000             | ,000  | 1,000 | ,000  |
|                           | 403133204         | ,000             | ,000  | ,000  | 1,000 |
|                           | 403133315         | ,000             | ,000  | ,000  | ,000  |
|                           | 403133322         | ,000             | ,000  | ,000  | ,000  |
|                           | 403133401         | ,000             | ,000  | ,000  | ,000  |
|                           | 403133402         | ,000             | ,000  | ,000  | ,000  |
|                           | 403133550         | ,000             | ,000  | ,000  | ,000  |
|                           | 403133772         | ,000             | ,000  | ,000  | ,000  |
|                           | 403135803         | ,000             | ,000  | ,000  | ,000  |
|                           | 404060001         | ,000             | ,000  | ,000  | ,000  |
|                           | 404060002         | ,000             | ,000  | ,000  | ,000  |
|                           | 404310003         | ,000             | ,000  | ,000  | ,000  |
|                           | 404310004         | ,000             | ,000  | ,000  | ,000  |
|                           | 502300005         | ,000             | ,000  | ,000  | ,000  |
|                           | 502300006         | ,000             | ,000  | ,000  | ,000  |
|                           | 502300007         | ,000             | ,000  | ,000  | ,000  |
|                           | 502300214         | ,000             | ,000  | ,000  | ,000  |
|                           | 502300411         | ,000             | ,000  | ,000  | ,000  |
|                           | 502300415         | ,000             | ,000  | ,000  | ,000  |
|                           | 502300416         | ,000             | ,000  | ,000  | ,000  |
|                           | 502300811         | ,000             | ,000  | ,000  | ,000  |
|                           | 502300913         | ,000             | ,000  | ,000  | ,000  |
| bv1 belastning vs paencil | 1 medelbelastning |                  |       |       |       |
|                           | 2 underbelastning |                  |       |       |       |
|                           | 3 överbelastning  |                  |       |       |       |

## Categorical Variables Codings

|                           |                   | Parameter coding |       |       |       |
|---------------------------|-------------------|------------------|-------|-------|-------|
|                           |                   | (16)             | (17)  | (18)  | (19)  |
| VASTY2 (SAIR*10000)+VASTY | 403073101         | ,000             | ,000  | ,000  | ,000  |
|                           | 403073102         | ,000             | ,000  | ,000  | ,000  |
|                           | 403073103         | ,000             | ,000  | ,000  | ,000  |
|                           | 403073202         | ,000             | ,000  | ,000  | ,000  |
|                           | 403073203         | ,000             | ,000  | ,000  | ,000  |
|                           | 403073204         | ,000             | ,000  | ,000  | ,000  |
|                           | 403073303         | ,000             | ,000  | ,000  | ,000  |
|                           | 403073651         | ,000             | ,000  | ,000  | ,000  |
|                           | 403073771         | ,000             | ,000  | ,000  | ,000  |
|                           | 403133102         | ,000             | ,000  | ,000  | ,000  |
|                           | 403133106         | ,000             | ,000  | ,000  | ,000  |
|                           | 403133107         | ,000             | ,000  | ,000  | ,000  |
|                           | 403133109         | ,000             | ,000  | ,000  | ,000  |
|                           | 403133202         | ,000             | ,000  | ,000  | ,000  |
|                           | 403133203         | ,000             | ,000  | ,000  | ,000  |
|                           | 403133204         | ,000             | ,000  | ,000  | ,000  |
|                           | 403133315         | 1,000            | ,000  | ,000  | ,000  |
|                           | 403133322         | ,000             | 1,000 | ,000  | ,000  |
|                           | 403133401         | ,000             | ,000  | 1,000 | ,000  |
|                           | 403133402         | ,000             | ,000  | ,000  | 1,000 |
|                           | 403133550         | ,000             | ,000  | ,000  | ,000  |
|                           | 403133772         | ,000             | ,000  | ,000  | ,000  |
|                           | 403135803         | ,000             | ,000  | ,000  | ,000  |
|                           | 404060001         | ,000             | ,000  | ,000  | ,000  |
|                           | 404060002         | ,000             | ,000  | ,000  | ,000  |
|                           | 404310003         | ,000             | ,000  | ,000  | ,000  |
|                           | 404310004         | ,000             | ,000  | ,000  | ,000  |
|                           | 502300005         | ,000             | ,000  | ,000  | ,000  |
|                           | 502300006         | ,000             | ,000  | ,000  | ,000  |
|                           | 502300007         | ,000             | ,000  | ,000  | ,000  |
|                           | 502300214         | ,000             | ,000  | ,000  | ,000  |
|                           | 502300411         | ,000             | ,000  | ,000  | ,000  |
|                           | 502300415         | ,000             | ,000  | ,000  | ,000  |
|                           | 502300416         | ,000             | ,000  | ,000  | ,000  |
|                           | 502300811         | ,000             | ,000  | ,000  | ,000  |
|                           | 502300913         | ,000             | ,000  | ,000  | ,000  |
| bv1 belastning vs paencil | 1 medelbelastning |                  |       |       |       |
|                           | 2 underbelastning |                  |       |       |       |
|                           | 3 överbelastning  |                  |       |       |       |

## Categorical Variables Codings

|                           |                   | Parameter coding |       |       |       |
|---------------------------|-------------------|------------------|-------|-------|-------|
|                           |                   | (20)             | (21)  | (22)  | (23)  |
| VASTY2 (SAIR*10000)+VASTY | 403073101         | ,000             | ,000  | ,000  | ,000  |
|                           | 403073102         | ,000             | ,000  | ,000  | ,000  |
|                           | 403073103         | ,000             | ,000  | ,000  | ,000  |
|                           | 403073202         | ,000             | ,000  | ,000  | ,000  |
|                           | 403073203         | ,000             | ,000  | ,000  | ,000  |
|                           | 403073204         | ,000             | ,000  | ,000  | ,000  |
|                           | 403073303         | ,000             | ,000  | ,000  | ,000  |
|                           | 403073651         | ,000             | ,000  | ,000  | ,000  |
|                           | 403073771         | ,000             | ,000  | ,000  | ,000  |
|                           | 403133102         | ,000             | ,000  | ,000  | ,000  |
|                           | 403133106         | ,000             | ,000  | ,000  | ,000  |
|                           | 403133107         | ,000             | ,000  | ,000  | ,000  |
|                           | 403133109         | ,000             | ,000  | ,000  | ,000  |
|                           | 403133202         | ,000             | ,000  | ,000  | ,000  |
|                           | 403133203         | ,000             | ,000  | ,000  | ,000  |
|                           | 403133204         | ,000             | ,000  | ,000  | ,000  |
|                           | 403133315         | ,000             | ,000  | ,000  | ,000  |
|                           | 403133322         | ,000             | ,000  | ,000  | ,000  |
|                           | 403133401         | ,000             | ,000  | ,000  | ,000  |
|                           | 403133402         | ,000             | ,000  | ,000  | ,000  |
|                           | 403133550         | 1,000            | ,000  | ,000  | ,000  |
|                           | 403133772         | ,000             | 1,000 | ,000  | ,000  |
|                           | 403135803         | ,000             | ,000  | 1,000 | ,000  |
|                           | 404060001         | ,000             | ,000  | ,000  | 1,000 |
|                           | 404060002         | ,000             | ,000  | ,000  | ,000  |
|                           | 404310003         | ,000             | ,000  | ,000  | ,000  |
|                           | 404310004         | ,000             | ,000  | ,000  | ,000  |
|                           | 502300005         | ,000             | ,000  | ,000  | ,000  |
|                           | 502300006         | ,000             | ,000  | ,000  | ,000  |
|                           | 502300007         | ,000             | ,000  | ,000  | ,000  |
|                           | 502300214         | ,000             | ,000  | ,000  | ,000  |
|                           | 502300411         | ,000             | ,000  | ,000  | ,000  |
|                           | 502300415         | ,000             | ,000  | ,000  | ,000  |
|                           | 502300416         | ,000             | ,000  | ,000  | ,000  |
|                           | 502300811         | ,000             | ,000  | ,000  | ,000  |
|                           | 502300913         | ,000             | ,000  | ,000  | ,000  |
| bv1 belastning vs paencil | 1 medelbelastning |                  |       |       |       |
|                           | 2 underbelastning |                  |       |       |       |
|                           | 3 överbelastning  |                  |       |       |       |



## Categorical Variables Codings

|                           |                   | Parameter coding |       |       |       |
|---------------------------|-------------------|------------------|-------|-------|-------|
|                           |                   | (24)             | (25)  | (26)  | (27)  |
| VASTY2 (SAIR*10000)+VASTY | 403073101         | ,000             | ,000  | ,000  | ,000  |
|                           | 403073102         | ,000             | ,000  | ,000  | ,000  |
|                           | 403073103         | ,000             | ,000  | ,000  | ,000  |
|                           | 403073202         | ,000             | ,000  | ,000  | ,000  |
|                           | 403073203         | ,000             | ,000  | ,000  | ,000  |
|                           | 403073204         | ,000             | ,000  | ,000  | ,000  |
|                           | 403073303         | ,000             | ,000  | ,000  | ,000  |
|                           | 403073651         | ,000             | ,000  | ,000  | ,000  |
|                           | 403073771         | ,000             | ,000  | ,000  | ,000  |
|                           | 403133102         | ,000             | ,000  | ,000  | ,000  |
|                           | 403133106         | ,000             | ,000  | ,000  | ,000  |
|                           | 403133107         | ,000             | ,000  | ,000  | ,000  |
|                           | 403133109         | ,000             | ,000  | ,000  | ,000  |
|                           | 403133202         | ,000             | ,000  | ,000  | ,000  |
|                           | 403133203         | ,000             | ,000  | ,000  | ,000  |
|                           | 403133204         | ,000             | ,000  | ,000  | ,000  |
|                           | 403133315         | ,000             | ,000  | ,000  | ,000  |
|                           | 403133322         | ,000             | ,000  | ,000  | ,000  |
|                           | 403133401         | ,000             | ,000  | ,000  | ,000  |
|                           | 403133402         | ,000             | ,000  | ,000  | ,000  |
|                           | 403133550         | ,000             | ,000  | ,000  | ,000  |
|                           | 403133772         | ,000             | ,000  | ,000  | ,000  |
|                           | 403135803         | ,000             | ,000  | ,000  | ,000  |
|                           | 404060001         | ,000             | ,000  | ,000  | ,000  |
|                           | 404060002         | 1,000            | ,000  | ,000  | ,000  |
|                           | 404310003         | ,000             | 1,000 | ,000  | ,000  |
|                           | 404310004         | ,000             | ,000  | 1,000 | ,000  |
|                           | 502300005         | ,000             | ,000  | ,000  | 1,000 |
|                           | 502300006         | ,000             | ,000  | ,000  | ,000  |
|                           | 502300007         | ,000             | ,000  | ,000  | ,000  |
|                           | 502300214         | ,000             | ,000  | ,000  | ,000  |
|                           | 502300411         | ,000             | ,000  | ,000  | ,000  |
|                           | 502300415         | ,000             | ,000  | ,000  | ,000  |
|                           | 502300416         | ,000             | ,000  | ,000  | ,000  |
|                           | 502300811         | ,000             | ,000  | ,000  | ,000  |
|                           | 502300913         | ,000             | ,000  | ,000  | ,000  |
| bv1 belastning vs paencil | 1 medelbelastning |                  |       |       |       |
|                           | 2 underbelastning |                  |       |       |       |
|                           | 3 överbelastning  |                  |       |       |       |

## Categorical Variables Codings

|                           |                   | Parameter coding |       |       |       |
|---------------------------|-------------------|------------------|-------|-------|-------|
|                           |                   | (28)             | (29)  | (30)  | (31)  |
| VASTY2 (SAIR*10000)+VASTY | 403073101         | ,000             | ,000  | ,000  | ,000  |
|                           | 403073102         | ,000             | ,000  | ,000  | ,000  |
|                           | 403073103         | ,000             | ,000  | ,000  | ,000  |
|                           | 403073202         | ,000             | ,000  | ,000  | ,000  |
|                           | 403073203         | ,000             | ,000  | ,000  | ,000  |
|                           | 403073204         | ,000             | ,000  | ,000  | ,000  |
|                           | 403073303         | ,000             | ,000  | ,000  | ,000  |
|                           | 403073651         | ,000             | ,000  | ,000  | ,000  |
|                           | 403073771         | ,000             | ,000  | ,000  | ,000  |
|                           | 403133102         | ,000             | ,000  | ,000  | ,000  |
|                           | 403133106         | ,000             | ,000  | ,000  | ,000  |
|                           | 403133107         | ,000             | ,000  | ,000  | ,000  |
|                           | 403133109         | ,000             | ,000  | ,000  | ,000  |
|                           | 403133202         | ,000             | ,000  | ,000  | ,000  |
|                           | 403133203         | ,000             | ,000  | ,000  | ,000  |
|                           | 403133204         | ,000             | ,000  | ,000  | ,000  |
|                           | 403133315         | ,000             | ,000  | ,000  | ,000  |
|                           | 403133322         | ,000             | ,000  | ,000  | ,000  |
|                           | 403133401         | ,000             | ,000  | ,000  | ,000  |
|                           | 403133402         | ,000             | ,000  | ,000  | ,000  |
|                           | 403133550         | ,000             | ,000  | ,000  | ,000  |
|                           | 403133772         | ,000             | ,000  | ,000  | ,000  |
|                           | 403135803         | ,000             | ,000  | ,000  | ,000  |
|                           | 404060001         | ,000             | ,000  | ,000  | ,000  |
|                           | 404060002         | ,000             | ,000  | ,000  | ,000  |
|                           | 404310003         | ,000             | ,000  | ,000  | ,000  |
|                           | 404310004         | ,000             | ,000  | ,000  | ,000  |
|                           | 502300005         | ,000             | ,000  | ,000  | ,000  |
|                           | 502300006         | 1,000            | ,000  | ,000  | ,000  |
|                           | 502300007         | ,000             | 1,000 | ,000  | ,000  |
|                           | 502300214         | ,000             | ,000  | 1,000 | ,000  |
|                           | 502300411         | ,000             | ,000  | ,000  | 1,000 |
|                           | 502300415         | ,000             | ,000  | ,000  | ,000  |
|                           | 502300416         | ,000             | ,000  | ,000  | ,000  |
|                           | 502300811         | ,000             | ,000  | ,000  | ,000  |
|                           | 502300913         | ,000             | ,000  | ,000  | ,000  |
| bv1 belastning vs paencil | 1 medelbelastning |                  |       |       |       |
|                           | 2 underbelastning |                  |       |       |       |
|                           | 3 överbelastning  |                  |       |       |       |

## Categorical Variables Codings

|                           |                   | Parameter coding |       |       |       |
|---------------------------|-------------------|------------------|-------|-------|-------|
|                           |                   | (32)             | (33)  | (34)  | (35)  |
| VASTY2 (SAIR*10000)+VASTY | 403073101         | ,000             | ,000  | ,000  | ,000  |
|                           | 403073102         | ,000             | ,000  | ,000  | ,000  |
|                           | 403073103         | ,000             | ,000  | ,000  | ,000  |
|                           | 403073202         | ,000             | ,000  | ,000  | ,000  |
|                           | 403073203         | ,000             | ,000  | ,000  | ,000  |
|                           | 403073204         | ,000             | ,000  | ,000  | ,000  |
|                           | 403073303         | ,000             | ,000  | ,000  | ,000  |
|                           | 403073651         | ,000             | ,000  | ,000  | ,000  |
|                           | 403073771         | ,000             | ,000  | ,000  | ,000  |
|                           | 403133102         | ,000             | ,000  | ,000  | ,000  |
|                           | 403133106         | ,000             | ,000  | ,000  | ,000  |
|                           | 403133107         | ,000             | ,000  | ,000  | ,000  |
|                           | 403133109         | ,000             | ,000  | ,000  | ,000  |
|                           | 403133202         | ,000             | ,000  | ,000  | ,000  |
|                           | 403133203         | ,000             | ,000  | ,000  | ,000  |
|                           | 403133204         | ,000             | ,000  | ,000  | ,000  |
|                           | 403133315         | ,000             | ,000  | ,000  | ,000  |
|                           | 403133322         | ,000             | ,000  | ,000  | ,000  |
|                           | 403133401         | ,000             | ,000  | ,000  | ,000  |
|                           | 403133402         | ,000             | ,000  | ,000  | ,000  |
|                           | 403133550         | ,000             | ,000  | ,000  | ,000  |
|                           | 403133772         | ,000             | ,000  | ,000  | ,000  |
|                           | 403135803         | ,000             | ,000  | ,000  | ,000  |
|                           | 404060001         | ,000             | ,000  | ,000  | ,000  |
|                           | 404060002         | ,000             | ,000  | ,000  | ,000  |
|                           | 404310003         | ,000             | ,000  | ,000  | ,000  |
|                           | 404310004         | ,000             | ,000  | ,000  | ,000  |
|                           | 502300005         | ,000             | ,000  | ,000  | ,000  |
|                           | 502300006         | ,000             | ,000  | ,000  | ,000  |
|                           | 502300007         | ,000             | ,000  | ,000  | ,000  |
|                           | 502300214         | ,000             | ,000  | ,000  | ,000  |
|                           | 502300411         | ,000             | ,000  | ,000  | ,000  |
|                           | 502300415         | 1,000            | ,000  | ,000  | ,000  |
|                           | 502300416         | ,000             | 1,000 | ,000  | ,000  |
|                           | 502300811         | ,000             | ,000  | 1,000 | ,000  |
|                           | 502300913         | ,000             | ,000  | ,000  | 1,000 |
| bv1 belastning vs paencil | 1 medelbelastning |                  |       |       |       |
|                           | 2 underbelastning |                  |       |       |       |
|                           | 3 överbelastning  |                  |       |       |       |

**Block 0: Beginning Block**

Classification Table<sup>a,b</sup>

| Observed           |                                                   |                                                              |
|--------------------|---------------------------------------------------|--------------------------------------------------------------|
| Step 0             | seuraust3 seuraus highest = haitta (i någon form) | 0 ingen händelse eller ei haittaa<br>1 haitta (i någon form) |
| Overall Percentage |                                                   |                                                              |

Classification Table<sup>a,b</sup>

| Observed           |                                                   |                                                              | Predicted                         |
|--------------------|---------------------------------------------------|--------------------------------------------------------------|-----------------------------------|
|                    |                                                   |                                                              | seuraust3 seuraus highest         |
|                    |                                                   |                                                              | 0 ingen händelse eller ei haittaa |
| Step 0             | seuraust3 seuraus highest = haitta (i någon form) | 0 ingen händelse eller ei haittaa<br>1 haitta (i någon form) | 12075<br>400                      |
| Overall Percentage |                                                   |                                                              |                                   |

Classification Table<sup>a,b</sup>

| Observed           |                                                   |                                                              | Predicted                    |
|--------------------|---------------------------------------------------|--------------------------------------------------------------|------------------------------|
|                    |                                                   |                                                              | seuraust3 seuraus highest .. |
|                    |                                                   |                                                              | 1 haitta (i någon form)      |
| Step 0             | seuraust3 seuraus highest = haitta (i någon form) | 0 ingen händelse eller ei haittaa<br>1 haitta (i någon form) | 0<br>0                       |
| Overall Percentage |                                                   |                                                              |                              |

Classification Table<sup>a,b</sup>

| Observed           |                                                   |                                                              | Predicted          |
|--------------------|---------------------------------------------------|--------------------------------------------------------------|--------------------|
|                    |                                                   |                                                              | Percentage Correct |
| Step 0             | seuraust3 seuraus highest = haitta (i någon form) | 0 ingen händelse eller ei haittaa<br>1 haitta (i någon form) | 100,0<br>,0        |
| Overall Percentage |                                                   |                                                              | 96,8               |

a. Constant is included in the model.

b. The cut value is ,500

## Variables in the Equation

|                 | B      | S.E. | Wald     | df | Sig. | Exp(B) |
|-----------------|--------|------|----------|----|------|--------|
| Step 0 Constant | -3,407 | ,051 | 4495,313 | 1  | ,000 | ,033   |

## Variables not in the Equation

|                  | Score   | df | Sig. |
|------------------|---------|----|------|
| Step 0 Variables |         |    |      |
| bv1              | 15,180  | 2  | ,001 |
| bv1(1)           | 13,218  | 1  | ,000 |
| bv1(2)           | 7,430   | 1  | ,006 |
| VASTY2           | 321,056 | 35 | ,000 |
| VASTY2(1)        | 1,769   | 1  | ,184 |
| VASTY2(2)        | 27,206  | 1  | ,000 |
| VASTY2(3)        | 8,562   | 1  | ,003 |
| VASTY2(4)        | ,988    | 1  | ,320 |
| VASTY2(5)        | ,587    | 1  | ,444 |
| VASTY2(6)        | 8,528   | 1  | ,003 |
| VASTY2(7)        | 2,666   | 1  | ,103 |
| VASTY2(8)        | ,008    | 1  | ,929 |
| VASTY2(9)        | 19,221  | 1  | ,000 |
| VASTY2(10)       | 58,192  | 1  | ,000 |
| VASTY2(11)       | 21,278  | 1  | ,000 |
| VASTY2(12)       | 2,551   | 1  | ,110 |
| VASTY2(13)       | 62,883  | 1  | ,000 |
| VASTY2(14)       | ,045    | 1  | ,832 |
| VASTY2(15)       | 8,562   | 1  | ,003 |
| VASTY2(16)       | 1,322   | 1  | ,250 |
| VASTY2(17)       | 2,012   | 1  | ,156 |
| VASTY2(18)       | 6,791   | 1  | ,009 |
| VASTY2(19)       | 10,418  | 1  | ,001 |
| VASTY2(20)       | ,662    | 1  | ,416 |
| VASTY2(21)       | 8,562   | 1  | ,003 |
| VASTY2(22)       | 5,396   | 1  | ,020 |
| VASTY2(23)       | ,045    | 1  | ,832 |
| VASTY2(24)       | 5,427   | 1  | ,020 |
| VASTY2(25)       | 6,092   | 1  | ,014 |
| VASTY2(26)       | 7,868   | 1  | ,005 |
| VASTY2(27)       | 5,427   | 1  | ,020 |
| VASTY2(28)       | ,715    | 1  | ,398 |
| VASTY2(29)       | 2,983   | 1  | ,084 |
| VASTY2(30)       | 2,034   | 1  | ,154 |
| VASTY2(31)       | 30,255  | 1  | ,000 |
| VASTY2(32)       | 1,902   | 1  | ,168 |
| VASTY2(33)       | 1,968   | 1  | ,161 |
| VASTY2(34)       | 6,856   | 1  | ,009 |
| VASTY2(35)       | ,127    | 1  | ,722 |

## Variables not in the Equation

|                    | Score   | df | Sig. |
|--------------------|---------|----|------|
| Overall Statistics | 325,210 | 37 | ,000 |

## Block 1: Method = Enter

## Omnibus Tests of Model Coefficients

|             | Chi-square | df | Sig. |
|-------------|------------|----|------|
| Step 1 Step | 300,184    | 37 | ,000 |
| Block       | 300,184    | 37 | ,000 |
| Model       | 300,184    | 37 | ,000 |

## Model Summary

| Step | -2 Log likelihood     | Cox & Snell R Square | Nagelkerke R Square |
|------|-----------------------|----------------------|---------------------|
| 1    | 3238,864 <sup>a</sup> | ,024                 | ,096                |

a. Estimation terminated at iteration number 9 because parameter estimates changed by less than ,001.

Classification Table<sup>a</sup>

| Observed           |                                                    |                                                              |
|--------------------|----------------------------------------------------|--------------------------------------------------------------|
| Step 1             | seorauslt3 seoraus highest = haitta (i någon form) | 0 ingen händelse eller ei haittaa<br>1 haitta (i någon form) |
| Overall Percentage |                                                    |                                                              |

Classification Table<sup>a</sup>

|                    |                                                    |                                                              | Predicted                         |
|--------------------|----------------------------------------------------|--------------------------------------------------------------|-----------------------------------|
|                    |                                                    |                                                              | seorauslt3 seoraus highest        |
|                    |                                                    |                                                              | 0 ingen händelse eller ei haittaa |
| Step 1             | seorauslt3 seoraus highest = haitta (i någon form) | 0 ingen händelse eller ei haittaa<br>1 haitta (i någon form) | 12075<br>400                      |
| Overall Percentage |                                                    |                                                              |                                   |

Classification Table<sup>a</sup>

| Observed           |                                                   |                                   | Predicted                    |                         |
|--------------------|---------------------------------------------------|-----------------------------------|------------------------------|-------------------------|
|                    |                                                   |                                   | seuraust3 seuraus highest .. | 1 haitta (i någon form) |
| Step 1             | seuraust3 seuraus highest = haitta (i någon form) | 0 ingen händelse eller ei haittaa | 0                            |                         |
|                    |                                                   | 1 haitta (i någon form)           | 0                            |                         |
| Overall Percentage |                                                   |                                   |                              |                         |

Classification Table<sup>a</sup>

| Observed           |                                                   |                                   | Predicted          |  |
|--------------------|---------------------------------------------------|-----------------------------------|--------------------|--|
|                    |                                                   |                                   | Percentage Correct |  |
| Step 1             | seuraust3 seuraus highest = haitta (i någon form) | 0 ingen händelse eller ei haittaa | 100,0              |  |
|                    |                                                   | 1 haitta (i någon form)           | ,0                 |  |
| Overall Percentage |                                                   |                                   | 96,8               |  |

a. The cut value is ,500

Variables in the Equation

|                         | B      | S.E. | Wald    | df | Sig. | Exp(B) |
|-------------------------|--------|------|---------|----|------|--------|
| Step 1 <sup>a</sup> bv1 |        |      | 4,262   | 2  | ,119 |        |
| bv1(1)                  | -,197  | ,148 | 1,765   | 1  | ,184 | ,821   |
| bv1(2)                  | ,124   | ,119 | 1,076   | 1  | ,300 | 1,132  |
| VASTY2                  |        |      | 224,461 | 35 | ,000 |        |
| VASTY2(1)               | ,598   | ,424 | 1,990   | 1  | ,158 | 1,818  |
| VASTY2(2)               | 1,196  | ,389 | 9,428   | 1  | ,002 | 3,306  |
| VASTY2(3)               | -1,630 | ,787 | 4,283   | 1  | ,038 | ,196   |
| VASTY2(4)               | ,446   | ,431 | 1,070   | 1  | ,301 | 1,561  |
| VASTY2(5)               | ,447   | ,441 | 1,025   | 1  | ,311 | 1,563  |
| VASTY2(6)               | -1,585 | ,786 | 4,062   | 1  | ,044 | ,205   |
| VASTY2(7)               | ,558   | ,425 | 1,726   | 1  | ,189 | 1,747  |
| VASTY2(8)               | ,242   | ,448 | ,291    | 1  | ,590 | 1,273  |
| VASTY2(9)               | 1,083  | ,398 | 7,419   | 1  | ,006 | 2,954  |
| VASTY2(10)              | 1,445  | ,380 | 14,450  | 1  | ,000 | 4,244  |
| VASTY2(11)              | 1,131  | ,393 | 8,286   | 1  | ,004 | 3,098  |
| VASTY2(12)              | ,610   | ,420 | 2,110   | 1  | ,146 | 1,840  |
| VASTY2(13)              | 1,428  | ,382 | 14,000  | 1  | ,000 | 4,172  |
| VASTY2(14)              | ,154   | ,457 | ,113    | 1  | ,737 | 1,166  |
| VASTY2(15)              | -1,562 | ,786 | 3,953   | 1  | ,047 | ,210   |
| VASTY2(16)              | -,398  | ,674 | ,349    | 1  | ,555 | ,672   |

## Variables in the Equation

|                     |            | 95% C.I. for EXP(B) |       |
|---------------------|------------|---------------------|-------|
|                     |            | Lower               | Upper |
| Step 1 <sup>a</sup> | bv1        |                     |       |
|                     | bv1(1)     | ,614                | 1,098 |
|                     | bv1(2)     | ,896                | 1,430 |
|                     | VASTY2     |                     |       |
|                     | VASTY2(1)  | ,792                | 4,170 |
|                     | VASTY2(2)  | 1,541               | 7,093 |
|                     | VASTY2(3)  | ,042                | ,917  |
|                     | VASTY2(4)  | ,671                | 3,633 |
|                     | VASTY2(5)  | ,658                | 3,710 |
|                     | VASTY2(6)  | ,044                | ,957  |
|                     | VASTY2(7)  | ,760                | 4,014 |
|                     | VASTY2(8)  | ,529                | 3,065 |
|                     | VASTY2(9)  | 1,355               | 6,442 |
|                     | VASTY2(10) | 2,014               | 8,942 |
|                     | VASTY2(11) | 1,435               | 6,690 |
|                     | VASTY2(12) | ,808                | 4,189 |
|                     | VASTY2(13) | 1,974               | 8,815 |
|                     | VASTY2(14) | ,476                | 2,855 |
|                     | VASTY2(15) | ,045                | ,978  |
|                     | VASTY2(16) | ,179                | 2,516 |

review only



## Variables in the Equation

|            | B      | S.E.  | Wald    | df | Sig. | Exp(B) |
|------------|--------|-------|---------|----|------|--------|
| VASTY2(17) | -,240  | ,510  | ,221    | 1  | ,638 | ,787   |
| VASTY2(18) | -1,109 | ,671  | 2,732   | 1  | ,098 | ,330   |
| VASTY2(19) | -2,077 | 1,061 | 3,833   | 1  | ,050 | ,125   |
| VASTY2(20) | ,452   | ,450  | 1,010   | 1  | ,315 | 1,572  |
| VASTY2(21) | -1,553 | ,786  | 3,907   | 1  | ,048 | ,212   |
| VASTY2(22) | -,763  | ,606  | 1,581   | 1  | ,209 | ,466   |
| VASTY2(23) | ,221   | ,456  | ,236    | 1  | ,627 | 1,248  |
| VASTY2(24) | -,910  | ,607  | 2,246   | 1  | ,134 | ,403   |
| VASTY2(25) | -1,288 | ,786  | 2,688   | 1  | ,101 | ,276   |
| VASTY2(26) | -2,035 | 1,057 | 3,701   | 1  | ,054 | ,131   |
| VASTY2(27) | -,885  | ,607  | 2,129   | 1  | ,145 | ,413   |
| VASTY2(28) | -,184  | ,566  | ,106    | 1  | ,745 | ,832   |
| VASTY2(29) | -,455  | ,533  | ,731    | 1  | ,393 | ,634   |
| VASTY2(30) | -,294  | ,510  | ,333    | 1  | ,564 | ,745   |
| VASTY2(31) | 1,255  | ,389  | 10,390  | 1  | ,001 | 3,507  |
| VASTY2(32) | -,214  | ,511  | ,175    | 1  | ,675 | ,807   |
| VASTY2(33) | -,236  | ,510  | ,213    | 1  | ,644 | ,790   |
| VASTY2(34) | -1,133 | ,671  | 2,852   | 1  | ,091 | ,322   |
| VASTY2(35) | ,075   | ,481  | ,024    | 1  | ,876 | 1,078  |
| Constant   | -3,641 | ,341  | 114,195 | 1  | ,000 | ,026   |

## Variables in the Equation

|            | 95% C.I. for EXP(B) |       |
|------------|---------------------|-------|
|            | Lower               | Upper |
| VASTY2(17) | ,290                | 2,137 |
| VASTY2(18) | ,088                | 1,229 |
| VASTY2(19) | ,016                | 1,002 |
| VASTY2(20) | ,651                | 3,795 |
| VASTY2(21) | ,045                | ,987  |
| VASTY2(22) | ,142                | 1,531 |
| VASTY2(23) | ,511                | 3,049 |
| VASTY2(24) | ,122                | 1,323 |
| VASTY2(25) | ,059                | 1,286 |
| VASTY2(26) | ,016                | 1,039 |
| VASTY2(27) | ,126                | 1,355 |
| VASTY2(28) | ,275                | 2,520 |
| VASTY2(29) | ,223                | 1,802 |
| VASTY2(30) | ,274                | 2,024 |
| VASTY2(31) | 1,635               | 7,523 |
| VASTY2(32) | ,297                | 2,198 |
| VASTY2(33) | ,291                | 2,148 |
| VASTY2(34) | ,086                | 1,200 |
| VASTY2(35) | ,420                | 2,766 |
| Constant   |                     |       |

a. Variable(s) entered on step 1: bv1, VASTY2.

```
LOGISTIC REGRESSION VARIABLES seurauslt3
/METHOD=ENTER bv2 VASTY2
/CONTRAST (bv2)=Indicator(1)
/CONTRAST (VASTY2)=Indicator(1)
/PRINT=CI(95)
/CRITERIA=PIN(0.05) POUT(0.10) ITERATE(20) CUT(0.5).
```

## Logistic Regression

[DataSet6] C:\cWordjan\Rafaela\_VCS\alla\_tillsammans\abo\_bjo\_vasa\_v1.sav

### Case Processing Summary

| Unweighted Cases <sup>a</sup> |                      | N     | Percent |
|-------------------------------|----------------------|-------|---------|
| Selected Cases                | Included in Analysis | 12475 | 100,0   |
|                               | Missing Cases        | 0     | ,0      |
|                               | Total                | 12475 | 100,0   |
| Unselected Cases              |                      | 0     | ,0      |
| Total                         |                      | 12475 | 100,0   |

a. If weight is in effect, see classification table for the total number of cases.

## Dependent Variable Encoding

| Original Value                    | Internal Value |
|-----------------------------------|----------------|
| 0 ingen händelse eller ei haittaa | 0              |
| 1 haitta (i någon form)           | 1              |

## Categorical Variables Codings

|                           |           | Frequency | Parameter coding |       |
|---------------------------|-----------|-----------|------------------|-------|
|                           |           |           | (1)              | (2)   |
| VASTY2 (SAIR*10000)+VASTY | 403073101 | 365       | ,000             | ,000  |
|                           | 403073102 | 362       | 1,000            | ,000  |
|                           | 403073103 | 365       | ,000             | 1,000 |
|                           | 403073202 | 365       | ,000             | ,000  |
|                           | 403073203 | 365       | ,000             | ,000  |
|                           | 403073204 | 330       | ,000             | ,000  |
|                           | 403073303 | 364       | ,000             | ,000  |
|                           | 403073651 | 362       | ,000             | ,000  |
|                           | 403073771 | 365       | ,000             | ,000  |
|                           | 403133102 | 341       | ,000             | ,000  |
|                           | 403133106 | 365       | ,000             | ,000  |
|                           | 403133107 | 365       | ,000             | ,000  |
|                           | 403133109 | 365       | ,000             | ,000  |
|                           | 403133202 | 365       | ,000             | ,000  |
|                           | 403133203 | 365       | ,000             | ,000  |
|                           | 403133204 | 365       | ,000             | ,000  |
|                           | 403133315 | 177       | ,000             | ,000  |
|                           | 403133322 | 365       | ,000             | ,000  |
|                           | 403133401 | 362       | ,000             | ,000  |
|                           | 403133402 | 365       | ,000             | ,000  |
|                           | 403133550 | 298       | ,000             | ,000  |
|                           | 403133772 | 365       | ,000             | ,000  |
|                           | 403135803 | 365       | ,000             | ,000  |
|                           | 404060001 | 365       | ,000             | ,000  |
|                           | 404060002 | 366       | ,000             | ,000  |
|                           | 404310003 | 291       | ,000             | ,000  |
|                           | 404310004 | 291       | ,000             | ,000  |
|                           | 502300005 | 366       | ,000             | ,000  |
|                           | 502300006 | 225       | ,000             | ,000  |
|                           | 502300007 | 366       | ,000             | ,000  |
|                           | 502300214 | 366       | ,000             | ,000  |
|                           | 502300411 | 366       | ,000             | ,000  |
|                           | 502300415 | 360       | ,000             | ,000  |
|                           | 502300416 | 363       | ,000             | ,000  |
|                           | 502300811 | 364       | ,000             | ,000  |
|                           | 502300913 | 315       | ,000             | ,000  |

## Categorical Variables Codings

|                           |           | Parameter coding |       |       |
|---------------------------|-----------|------------------|-------|-------|
|                           |           | (3)              | (4)   | (5)   |
| VASTY2 (SAIR*10000)+VASTY | 403073101 | ,000             | ,000  | ,000  |
|                           | 403073102 | ,000             | ,000  | ,000  |
|                           | 403073103 | ,000             | ,000  | ,000  |
|                           | 403073202 | 1,000            | ,000  | ,000  |
|                           | 403073203 | ,000             | 1,000 | ,000  |
|                           | 403073204 | ,000             | ,000  | 1,000 |
|                           | 403073303 | ,000             | ,000  | ,000  |
|                           | 403073651 | ,000             | ,000  | ,000  |
|                           | 403073771 | ,000             | ,000  | ,000  |
|                           | 403133102 | ,000             | ,000  | ,000  |
|                           | 403133106 | ,000             | ,000  | ,000  |
|                           | 403133107 | ,000             | ,000  | ,000  |
|                           | 403133109 | ,000             | ,000  | ,000  |
|                           | 403133202 | ,000             | ,000  | ,000  |
|                           | 403133203 | ,000             | ,000  | ,000  |
|                           | 403133204 | ,000             | ,000  | ,000  |
|                           | 403133315 | ,000             | ,000  | ,000  |
|                           | 403133322 | ,000             | ,000  | ,000  |
|                           | 403133401 | ,000             | ,000  | ,000  |
|                           | 403133402 | ,000             | ,000  | ,000  |
|                           | 403133550 | ,000             | ,000  | ,000  |
|                           | 403133772 | ,000             | ,000  | ,000  |
|                           | 403135803 | ,000             | ,000  | ,000  |
|                           | 404060001 | ,000             | ,000  | ,000  |
|                           | 404060002 | ,000             | ,000  | ,000  |
|                           | 404310003 | ,000             | ,000  | ,000  |
|                           | 404310004 | ,000             | ,000  | ,000  |
|                           | 502300005 | ,000             | ,000  | ,000  |
|                           | 502300006 | ,000             | ,000  | ,000  |
|                           | 502300007 | ,000             | ,000  | ,000  |
|                           | 502300214 | ,000             | ,000  | ,000  |
|                           | 502300411 | ,000             | ,000  | ,000  |
|                           | 502300415 | ,000             | ,000  | ,000  |
|                           | 502300416 | ,000             | ,000  | ,000  |
|                           | 502300811 | ,000             | ,000  | ,000  |
|                           | 502300913 | ,000             | ,000  | ,000  |

**Categorical Variables Codings**

|                           |           | Parameter coding |       |       |
|---------------------------|-----------|------------------|-------|-------|
|                           |           | (6)              | (7)   | (8)   |
| VASTY2 (SAIR*10000)+VASTY | 403073101 | ,000             | ,000  | ,000  |
|                           | 403073102 | ,000             | ,000  | ,000  |
|                           | 403073103 | ,000             | ,000  | ,000  |
|                           | 403073202 | ,000             | ,000  | ,000  |
|                           | 403073203 | ,000             | ,000  | ,000  |
|                           | 403073204 | ,000             | ,000  | ,000  |
|                           | 403073303 | 1,000            | ,000  | ,000  |
|                           | 403073651 | ,000             | 1,000 | ,000  |
|                           | 403073771 | ,000             | ,000  | 1,000 |
|                           | 403133102 | ,000             | ,000  | ,000  |
|                           | 403133106 | ,000             | ,000  | ,000  |
|                           | 403133107 | ,000             | ,000  | ,000  |
|                           | 403133109 | ,000             | ,000  | ,000  |
|                           | 403133202 | ,000             | ,000  | ,000  |
|                           | 403133203 | ,000             | ,000  | ,000  |
|                           | 403133204 | ,000             | ,000  | ,000  |
|                           | 403133315 | ,000             | ,000  | ,000  |
|                           | 403133322 | ,000             | ,000  | ,000  |
|                           | 403133401 | ,000             | ,000  | ,000  |
|                           | 403133402 | ,000             | ,000  | ,000  |
|                           | 403133550 | ,000             | ,000  | ,000  |
|                           | 403133772 | ,000             | ,000  | ,000  |
|                           | 403135803 | ,000             | ,000  | ,000  |
|                           | 404060001 | ,000             | ,000  | ,000  |
|                           | 404060002 | ,000             | ,000  | ,000  |
|                           | 404310003 | ,000             | ,000  | ,000  |
|                           | 404310004 | ,000             | ,000  | ,000  |
|                           | 502300005 | ,000             | ,000  | ,000  |
|                           | 502300006 | ,000             | ,000  | ,000  |
|                           | 502300007 | ,000             | ,000  | ,000  |
|                           | 502300214 | ,000             | ,000  | ,000  |
|                           | 502300411 | ,000             | ,000  | ,000  |
|                           | 502300415 | ,000             | ,000  | ,000  |
|                           | 502300416 | ,000             | ,000  | ,000  |
|                           | 502300811 | ,000             | ,000  | ,000  |
|                           | 502300913 | ,000             | ,000  | ,000  |

## Categorical Variables Codings

|                           |           | Parameter coding |       |       |
|---------------------------|-----------|------------------|-------|-------|
|                           |           | (9)              | (10)  | (11)  |
| VASTY2 (SAIR*10000)+VASTY | 403073101 | ,000             | ,000  | ,000  |
|                           | 403073102 | ,000             | ,000  | ,000  |
|                           | 403073103 | ,000             | ,000  | ,000  |
|                           | 403073202 | ,000             | ,000  | ,000  |
|                           | 403073203 | ,000             | ,000  | ,000  |
|                           | 403073204 | ,000             | ,000  | ,000  |
|                           | 403073303 | ,000             | ,000  | ,000  |
|                           | 403073651 | ,000             | ,000  | ,000  |
|                           | 403073771 | ,000             | ,000  | ,000  |
|                           | 403133102 | 1,000            | ,000  | ,000  |
|                           | 403133106 | ,000             | 1,000 | ,000  |
|                           | 403133107 | ,000             | ,000  | 1,000 |
|                           | 403133109 | ,000             | ,000  | ,000  |
|                           | 403133202 | ,000             | ,000  | ,000  |
|                           | 403133203 | ,000             | ,000  | ,000  |
|                           | 403133204 | ,000             | ,000  | ,000  |
|                           | 403133315 | ,000             | ,000  | ,000  |
|                           | 403133322 | ,000             | ,000  | ,000  |
|                           | 403133401 | ,000             | ,000  | ,000  |
|                           | 403133402 | ,000             | ,000  | ,000  |
|                           | 403133550 | ,000             | ,000  | ,000  |
|                           | 403133772 | ,000             | ,000  | ,000  |
|                           | 403135803 | ,000             | ,000  | ,000  |
|                           | 404060001 | ,000             | ,000  | ,000  |
|                           | 404060002 | ,000             | ,000  | ,000  |
|                           | 404310003 | ,000             | ,000  | ,000  |
|                           | 404310004 | ,000             | ,000  | ,000  |
|                           | 502300005 | ,000             | ,000  | ,000  |
|                           | 502300006 | ,000             | ,000  | ,000  |
|                           | 502300007 | ,000             | ,000  | ,000  |
|                           | 502300214 | ,000             | ,000  | ,000  |
|                           | 502300411 | ,000             | ,000  | ,000  |
|                           | 502300415 | ,000             | ,000  | ,000  |
|                           | 502300416 | ,000             | ,000  | ,000  |
|                           | 502300811 | ,000             | ,000  | ,000  |
|                           | 502300913 | ,000             | ,000  | ,000  |

## Categorical Variables Codings

|                           |           | Parameter coding |       |       |
|---------------------------|-----------|------------------|-------|-------|
|                           |           | (12)             | (13)  | (14)  |
| VASTY2 (SAIR*10000)+VASTY | 403073101 | ,000             | ,000  | ,000  |
|                           | 403073102 | ,000             | ,000  | ,000  |
|                           | 403073103 | ,000             | ,000  | ,000  |
|                           | 403073202 | ,000             | ,000  | ,000  |
|                           | 403073203 | ,000             | ,000  | ,000  |
|                           | 403073204 | ,000             | ,000  | ,000  |
|                           | 403073303 | ,000             | ,000  | ,000  |
|                           | 403073651 | ,000             | ,000  | ,000  |
|                           | 403073771 | ,000             | ,000  | ,000  |
|                           | 403133102 | ,000             | ,000  | ,000  |
|                           | 403133106 | ,000             | ,000  | ,000  |
|                           | 403133107 | ,000             | ,000  | ,000  |
|                           | 403133109 | 1,000            | ,000  | ,000  |
|                           | 403133202 | ,000             | 1,000 | ,000  |
|                           | 403133203 | ,000             | ,000  | 1,000 |
|                           | 403133204 | ,000             | ,000  | ,000  |
|                           | 403133315 | ,000             | ,000  | ,000  |
|                           | 403133322 | ,000             | ,000  | ,000  |
|                           | 403133401 | ,000             | ,000  | ,000  |
|                           | 403133402 | ,000             | ,000  | ,000  |
|                           | 403133550 | ,000             | ,000  | ,000  |
|                           | 403133772 | ,000             | ,000  | ,000  |
|                           | 403135803 | ,000             | ,000  | ,000  |
|                           | 404060001 | ,000             | ,000  | ,000  |
|                           | 404060002 | ,000             | ,000  | ,000  |
|                           | 404310003 | ,000             | ,000  | ,000  |
|                           | 404310004 | ,000             | ,000  | ,000  |
|                           | 502300005 | ,000             | ,000  | ,000  |
|                           | 502300006 | ,000             | ,000  | ,000  |
|                           | 502300007 | ,000             | ,000  | ,000  |
|                           | 502300214 | ,000             | ,000  | ,000  |
|                           | 502300411 | ,000             | ,000  | ,000  |
|                           | 502300415 | ,000             | ,000  | ,000  |
|                           | 502300416 | ,000             | ,000  | ,000  |
|                           | 502300811 | ,000             | ,000  | ,000  |
|                           | 502300913 | ,000             | ,000  | ,000  |

## Categorical Variables Codings

|                           |           | Parameter coding |       |       |
|---------------------------|-----------|------------------|-------|-------|
|                           |           | (15)             | (16)  | (17)  |
| VASTY2 (SAIR*10000)+VASTY | 403073101 | ,000             | ,000  | ,000  |
|                           | 403073102 | ,000             | ,000  | ,000  |
|                           | 403073103 | ,000             | ,000  | ,000  |
|                           | 403073202 | ,000             | ,000  | ,000  |
|                           | 403073203 | ,000             | ,000  | ,000  |
|                           | 403073204 | ,000             | ,000  | ,000  |
|                           | 403073303 | ,000             | ,000  | ,000  |
|                           | 403073651 | ,000             | ,000  | ,000  |
|                           | 403073771 | ,000             | ,000  | ,000  |
|                           | 403133102 | ,000             | ,000  | ,000  |
|                           | 403133106 | ,000             | ,000  | ,000  |
|                           | 403133107 | ,000             | ,000  | ,000  |
|                           | 403133109 | ,000             | ,000  | ,000  |
|                           | 403133202 | ,000             | ,000  | ,000  |
|                           | 403133203 | ,000             | ,000  | ,000  |
|                           | 403133204 | 1,000            | ,000  | ,000  |
|                           | 403133315 | ,000             | 1,000 | ,000  |
|                           | 403133322 | ,000             | ,000  | 1,000 |
|                           | 403133401 | ,000             | ,000  | ,000  |
|                           | 403133402 | ,000             | ,000  | ,000  |
|                           | 403133550 | ,000             | ,000  | ,000  |
|                           | 403133772 | ,000             | ,000  | ,000  |
|                           | 403135803 | ,000             | ,000  | ,000  |
|                           | 404060001 | ,000             | ,000  | ,000  |
|                           | 404060002 | ,000             | ,000  | ,000  |
|                           | 404310003 | ,000             | ,000  | ,000  |
|                           | 404310004 | ,000             | ,000  | ,000  |
|                           | 502300005 | ,000             | ,000  | ,000  |
|                           | 502300006 | ,000             | ,000  | ,000  |
|                           | 502300007 | ,000             | ,000  | ,000  |
|                           | 502300214 | ,000             | ,000  | ,000  |
|                           | 502300411 | ,000             | ,000  | ,000  |
|                           | 502300415 | ,000             | ,000  | ,000  |
|                           | 502300416 | ,000             | ,000  | ,000  |
|                           | 502300811 | ,000             | ,000  | ,000  |
|                           | 502300913 | ,000             | ,000  | ,000  |



## Categorical Variables Codings

|                           |           | Parameter coding |       |       |
|---------------------------|-----------|------------------|-------|-------|
|                           |           | (18)             | (19)  | (20)  |
| VASTY2 (SAIR*10000)+VASTY | 403073101 | ,000             | ,000  | ,000  |
|                           | 403073102 | ,000             | ,000  | ,000  |
|                           | 403073103 | ,000             | ,000  | ,000  |
|                           | 403073202 | ,000             | ,000  | ,000  |
|                           | 403073203 | ,000             | ,000  | ,000  |
|                           | 403073204 | ,000             | ,000  | ,000  |
|                           | 403073303 | ,000             | ,000  | ,000  |
|                           | 403073651 | ,000             | ,000  | ,000  |
|                           | 403073771 | ,000             | ,000  | ,000  |
|                           | 403133102 | ,000             | ,000  | ,000  |
|                           | 403133106 | ,000             | ,000  | ,000  |
|                           | 403133107 | ,000             | ,000  | ,000  |
|                           | 403133109 | ,000             | ,000  | ,000  |
|                           | 403133202 | ,000             | ,000  | ,000  |
|                           | 403133203 | ,000             | ,000  | ,000  |
|                           | 403133204 | ,000             | ,000  | ,000  |
|                           | 403133315 | ,000             | ,000  | ,000  |
|                           | 403133322 | ,000             | ,000  | ,000  |
|                           | 403133401 | 1,000            | ,000  | ,000  |
|                           | 403133402 | ,000             | 1,000 | ,000  |
|                           | 403133550 | ,000             | ,000  | 1,000 |
|                           | 403133772 | ,000             | ,000  | ,000  |
|                           | 403135803 | ,000             | ,000  | ,000  |
|                           | 404060001 | ,000             | ,000  | ,000  |
|                           | 404060002 | ,000             | ,000  | ,000  |
|                           | 404310003 | ,000             | ,000  | ,000  |
|                           | 404310004 | ,000             | ,000  | ,000  |
|                           | 502300005 | ,000             | ,000  | ,000  |
|                           | 502300006 | ,000             | ,000  | ,000  |
|                           | 502300007 | ,000             | ,000  | ,000  |
|                           | 502300214 | ,000             | ,000  | ,000  |
|                           | 502300411 | ,000             | ,000  | ,000  |
|                           | 502300415 | ,000             | ,000  | ,000  |
|                           | 502300416 | ,000             | ,000  | ,000  |
|                           | 502300811 | ,000             | ,000  | ,000  |
|                           | 502300913 | ,000             | ,000  | ,000  |

## Categorical Variables Codings

|                           |           | Parameter coding |       |       |
|---------------------------|-----------|------------------|-------|-------|
|                           |           | (21)             | (22)  | (23)  |
| VASTY2 (SAIR*10000)+VASTY | 403073101 | ,000             | ,000  | ,000  |
|                           | 403073102 | ,000             | ,000  | ,000  |
|                           | 403073103 | ,000             | ,000  | ,000  |
|                           | 403073202 | ,000             | ,000  | ,000  |
|                           | 403073203 | ,000             | ,000  | ,000  |
|                           | 403073204 | ,000             | ,000  | ,000  |
|                           | 403073303 | ,000             | ,000  | ,000  |
|                           | 403073651 | ,000             | ,000  | ,000  |
|                           | 403073771 | ,000             | ,000  | ,000  |
|                           | 403133102 | ,000             | ,000  | ,000  |
|                           | 403133106 | ,000             | ,000  | ,000  |
|                           | 403133107 | ,000             | ,000  | ,000  |
|                           | 403133109 | ,000             | ,000  | ,000  |
|                           | 403133202 | ,000             | ,000  | ,000  |
|                           | 403133203 | ,000             | ,000  | ,000  |
|                           | 403133204 | ,000             | ,000  | ,000  |
|                           | 403133315 | ,000             | ,000  | ,000  |
|                           | 403133322 | ,000             | ,000  | ,000  |
|                           | 403133401 | ,000             | ,000  | ,000  |
|                           | 403133402 | ,000             | ,000  | ,000  |
|                           | 403133550 | ,000             | ,000  | ,000  |
|                           | 403133772 | 1,000            | ,000  | ,000  |
|                           | 403135803 | ,000             | 1,000 | ,000  |
|                           | 404060001 | ,000             | ,000  | 1,000 |
|                           | 404060002 | ,000             | ,000  | ,000  |
|                           | 404310003 | ,000             | ,000  | ,000  |
|                           | 404310004 | ,000             | ,000  | ,000  |
|                           | 502300005 | ,000             | ,000  | ,000  |
|                           | 502300006 | ,000             | ,000  | ,000  |
|                           | 502300007 | ,000             | ,000  | ,000  |
|                           | 502300214 | ,000             | ,000  | ,000  |
|                           | 502300411 | ,000             | ,000  | ,000  |
|                           | 502300415 | ,000             | ,000  | ,000  |
|                           | 502300416 | ,000             | ,000  | ,000  |
|                           | 502300811 | ,000             | ,000  | ,000  |
|                           | 502300913 | ,000             | ,000  | ,000  |

## Categorical Variables Codings

|                           |           | Parameter coding |       |       |
|---------------------------|-----------|------------------|-------|-------|
|                           |           | (24)             | (25)  | (26)  |
| VASTY2 (SAIR*10000)+VASTY | 403073101 | ,000             | ,000  | ,000  |
|                           | 403073102 | ,000             | ,000  | ,000  |
|                           | 403073103 | ,000             | ,000  | ,000  |
|                           | 403073202 | ,000             | ,000  | ,000  |
|                           | 403073203 | ,000             | ,000  | ,000  |
|                           | 403073204 | ,000             | ,000  | ,000  |
|                           | 403073303 | ,000             | ,000  | ,000  |
|                           | 403073651 | ,000             | ,000  | ,000  |
|                           | 403073771 | ,000             | ,000  | ,000  |
|                           | 403133102 | ,000             | ,000  | ,000  |
|                           | 403133106 | ,000             | ,000  | ,000  |
|                           | 403133107 | ,000             | ,000  | ,000  |
|                           | 403133109 | ,000             | ,000  | ,000  |
|                           | 403133202 | ,000             | ,000  | ,000  |
|                           | 403133203 | ,000             | ,000  | ,000  |
|                           | 403133204 | ,000             | ,000  | ,000  |
|                           | 403133315 | ,000             | ,000  | ,000  |
|                           | 403133322 | ,000             | ,000  | ,000  |
|                           | 403133401 | ,000             | ,000  | ,000  |
|                           | 403133402 | ,000             | ,000  | ,000  |
|                           | 403133550 | ,000             | ,000  | ,000  |
|                           | 403133772 | ,000             | ,000  | ,000  |
|                           | 403135803 | ,000             | ,000  | ,000  |
|                           | 404060001 | ,000             | ,000  | ,000  |
|                           | 404060002 | 1,000            | ,000  | ,000  |
|                           | 404310003 | ,000             | 1,000 | ,000  |
|                           | 404310004 | ,000             | ,000  | 1,000 |
|                           | 502300005 | ,000             | ,000  | ,000  |
|                           | 502300006 | ,000             | ,000  | ,000  |
|                           | 502300007 | ,000             | ,000  | ,000  |
|                           | 502300214 | ,000             | ,000  | ,000  |
|                           | 502300411 | ,000             | ,000  | ,000  |
|                           | 502300415 | ,000             | ,000  | ,000  |
|                           | 502300416 | ,000             | ,000  | ,000  |
|                           | 502300811 | ,000             | ,000  | ,000  |
|                           | 502300913 | ,000             | ,000  | ,000  |

## Categorical Variables Codings

|                           |           | Parameter coding |       |       |
|---------------------------|-----------|------------------|-------|-------|
|                           |           | (27)             | (28)  | (29)  |
| VASTY2 (SAIR*10000)+VASTY | 403073101 | ,000             | ,000  | ,000  |
|                           | 403073102 | ,000             | ,000  | ,000  |
|                           | 403073103 | ,000             | ,000  | ,000  |
|                           | 403073202 | ,000             | ,000  | ,000  |
|                           | 403073203 | ,000             | ,000  | ,000  |
|                           | 403073204 | ,000             | ,000  | ,000  |
|                           | 403073303 | ,000             | ,000  | ,000  |
|                           | 403073651 | ,000             | ,000  | ,000  |
|                           | 403073771 | ,000             | ,000  | ,000  |
|                           | 403133102 | ,000             | ,000  | ,000  |
|                           | 403133106 | ,000             | ,000  | ,000  |
|                           | 403133107 | ,000             | ,000  | ,000  |
|                           | 403133109 | ,000             | ,000  | ,000  |
|                           | 403133202 | ,000             | ,000  | ,000  |
|                           | 403133203 | ,000             | ,000  | ,000  |
|                           | 403133204 | ,000             | ,000  | ,000  |
|                           | 403133315 | ,000             | ,000  | ,000  |
|                           | 403133322 | ,000             | ,000  | ,000  |
|                           | 403133401 | ,000             | ,000  | ,000  |
|                           | 403133402 | ,000             | ,000  | ,000  |
|                           | 403133550 | ,000             | ,000  | ,000  |
|                           | 403133772 | ,000             | ,000  | ,000  |
|                           | 403135803 | ,000             | ,000  | ,000  |
|                           | 404060001 | ,000             | ,000  | ,000  |
|                           | 404060002 | ,000             | ,000  | ,000  |
|                           | 404310003 | ,000             | ,000  | ,000  |
|                           | 404310004 | ,000             | ,000  | ,000  |
|                           | 502300005 | 1,000            | ,000  | ,000  |
|                           | 502300006 | ,000             | 1,000 | ,000  |
|                           | 502300007 | ,000             | ,000  | 1,000 |
|                           | 502300214 | ,000             | ,000  | ,000  |
|                           | 502300411 | ,000             | ,000  | ,000  |
|                           | 502300415 | ,000             | ,000  | ,000  |
|                           | 502300416 | ,000             | ,000  | ,000  |
|                           | 502300811 | ,000             | ,000  | ,000  |
|                           | 502300913 | ,000             | ,000  | ,000  |

**Categorical Variables Codings**

|                           |           | Parameter coding |       |       |
|---------------------------|-----------|------------------|-------|-------|
|                           |           | (30)             | (31)  | (32)  |
| VASTY2 (SAIR*10000)+VASTY | 403073101 | ,000             | ,000  | ,000  |
|                           | 403073102 | ,000             | ,000  | ,000  |
|                           | 403073103 | ,000             | ,000  | ,000  |
|                           | 403073202 | ,000             | ,000  | ,000  |
|                           | 403073203 | ,000             | ,000  | ,000  |
|                           | 403073204 | ,000             | ,000  | ,000  |
|                           | 403073303 | ,000             | ,000  | ,000  |
|                           | 403073651 | ,000             | ,000  | ,000  |
|                           | 403073771 | ,000             | ,000  | ,000  |
|                           | 403133102 | ,000             | ,000  | ,000  |
|                           | 403133106 | ,000             | ,000  | ,000  |
|                           | 403133107 | ,000             | ,000  | ,000  |
|                           | 403133109 | ,000             | ,000  | ,000  |
|                           | 403133202 | ,000             | ,000  | ,000  |
|                           | 403133203 | ,000             | ,000  | ,000  |
|                           | 403133204 | ,000             | ,000  | ,000  |
|                           | 403133315 | ,000             | ,000  | ,000  |
|                           | 403133322 | ,000             | ,000  | ,000  |
|                           | 403133401 | ,000             | ,000  | ,000  |
|                           | 403133402 | ,000             | ,000  | ,000  |
|                           | 403133550 | ,000             | ,000  | ,000  |
|                           | 403133772 | ,000             | ,000  | ,000  |
|                           | 403135803 | ,000             | ,000  | ,000  |
|                           | 404060001 | ,000             | ,000  | ,000  |
|                           | 404060002 | ,000             | ,000  | ,000  |
|                           | 404310003 | ,000             | ,000  | ,000  |
|                           | 404310004 | ,000             | ,000  | ,000  |
|                           | 502300005 | ,000             | ,000  | ,000  |
|                           | 502300006 | ,000             | ,000  | ,000  |
|                           | 502300007 | ,000             | ,000  | ,000  |
|                           | 502300214 | 1,000            | ,000  | ,000  |
|                           | 502300411 | ,000             | 1,000 | ,000  |
|                           | 502300415 | ,000             | ,000  | 1,000 |
|                           | 502300416 | ,000             | ,000  | ,000  |
|                           | 502300811 | ,000             | ,000  | ,000  |
|                           | 502300913 | ,000             | ,000  | ,000  |

## Categorical Variables Codings

|                           |           | Parameter coding |       |       |
|---------------------------|-----------|------------------|-------|-------|
|                           |           | (33)             | (34)  | (35)  |
| VASTY2 (SAIR*10000)+VASTY | 403073101 | ,000             | ,000  | ,000  |
|                           | 403073102 | ,000             | ,000  | ,000  |
|                           | 403073103 | ,000             | ,000  | ,000  |
|                           | 403073202 | ,000             | ,000  | ,000  |
|                           | 403073203 | ,000             | ,000  | ,000  |
|                           | 403073204 | ,000             | ,000  | ,000  |
|                           | 403073303 | ,000             | ,000  | ,000  |
|                           | 403073651 | ,000             | ,000  | ,000  |
|                           | 403073771 | ,000             | ,000  | ,000  |
|                           | 403133102 | ,000             | ,000  | ,000  |
|                           | 403133106 | ,000             | ,000  | ,000  |
|                           | 403133107 | ,000             | ,000  | ,000  |
|                           | 403133109 | ,000             | ,000  | ,000  |
|                           | 403133202 | ,000             | ,000  | ,000  |
|                           | 403133203 | ,000             | ,000  | ,000  |
|                           | 403133204 | ,000             | ,000  | ,000  |
|                           | 403133315 | ,000             | ,000  | ,000  |
|                           | 403133322 | ,000             | ,000  | ,000  |
|                           | 403133401 | ,000             | ,000  | ,000  |
|                           | 403133402 | ,000             | ,000  | ,000  |
|                           | 403133550 | ,000             | ,000  | ,000  |
|                           | 403133772 | ,000             | ,000  | ,000  |
|                           | 403135803 | ,000             | ,000  | ,000  |
|                           | 404060001 | ,000             | ,000  | ,000  |
|                           | 404060002 | ,000             | ,000  | ,000  |
|                           | 404310003 | ,000             | ,000  | ,000  |
|                           | 404310004 | ,000             | ,000  | ,000  |
|                           | 502300005 | ,000             | ,000  | ,000  |
|                           | 502300006 | ,000             | ,000  | ,000  |
|                           | 502300007 | ,000             | ,000  | ,000  |
|                           | 502300214 | ,000             | ,000  | ,000  |
|                           | 502300411 | ,000             | ,000  | ,000  |
|                           | 502300415 | ,000             | ,000  | ,000  |
|                           | 502300416 | 1,000            | ,000  | ,000  |
|                           | 502300811 | ,000             | 1,000 | ,000  |
|                           | 502300913 | ,000             | ,000  | 1,000 |

**Categorical Variables Codings**

|                                             |                   | Frequency | Parameter coding |       |
|---------------------------------------------|-------------------|-----------|------------------|-------|
|                                             |                   |           | (1)              | (2)   |
| bv2 belastning vs paoncil halva intervallet | 1 medelbelastning | 2788      | ,000             | ,000  |
|                                             | 2 underbelastning | 4419      | 1,000            | ,000  |
|                                             | 3 överbelastning  | 5268      | ,000             | 1,000 |

**Categorical Variables Codings**

|                                             |                   | Parameter coding |     |     |
|---------------------------------------------|-------------------|------------------|-----|-----|
|                                             |                   | (3)              | (4) | (5) |
| bv2 belastning vs paoncil halva intervallet | 1 medelbelastning |                  |     |     |
|                                             | 2 underbelastning |                  |     |     |
|                                             | 3 överbelastning  |                  |     |     |

**Categorical Variables Codings**

|                                             |                   | Parameter coding |     |     |
|---------------------------------------------|-------------------|------------------|-----|-----|
|                                             |                   | (6)              | (7) | (8) |
| bv2 belastning vs paoncil halva intervallet | 1 medelbelastning |                  |     |     |
|                                             | 2 underbelastning |                  |     |     |
|                                             | 3 överbelastning  |                  |     |     |

**Categorical Variables Codings**

|                                             |                   | Parameter coding |      |      |
|---------------------------------------------|-------------------|------------------|------|------|
|                                             |                   | (9)              | (10) | (11) |
| bv2 belastning vs paoncil halva intervallet | 1 medelbelastning |                  |      |      |
|                                             | 2 underbelastning |                  |      |      |
|                                             | 3 överbelastning  |                  |      |      |

**Categorical Variables Codings**

|                                             |                   | Parameter coding |      |      |
|---------------------------------------------|-------------------|------------------|------|------|
|                                             |                   | (12)             | (13) | (14) |
| bv2 belastning vs paoncil halva intervallet | 1 medelbelastning |                  |      |      |
|                                             | 2 underbelastning |                  |      |      |
|                                             | 3 överbelastning  |                  |      |      |

**Categorical Variables Codings**

|                                             |                   | Parameter coding |      |      |
|---------------------------------------------|-------------------|------------------|------|------|
|                                             |                   | (15)             | (16) | (17) |
| bv2 belastning vs paoncil halva intervallet | 1 medelbelastning |                  |      |      |
|                                             | 2 underbelastning |                  |      |      |
|                                             | 3 överbelastning  |                  |      |      |

**Categorical Variables Codings**

|                                             |                   | Parameter coding |      |      |
|---------------------------------------------|-------------------|------------------|------|------|
|                                             |                   | (18)             | (19) | (20) |
| bv2 belastning vs paoncil halva intervallet | 1 medelbelastning |                  |      |      |
|                                             | 2 underbelastning |                  |      |      |
|                                             | 3 överbelastning  |                  |      |      |

**Categorical Variables Codings**

|                                             |                   | Parameter coding |      |      |
|---------------------------------------------|-------------------|------------------|------|------|
|                                             |                   | (21)             | (22) | (23) |
| bv2 belastning vs paoncil halva intervallet | 1 medelbelastning |                  |      |      |
|                                             | 2 underbelastning |                  |      |      |
|                                             | 3 överbelastning  |                  |      |      |

**Categorical Variables Codings**

|                                             |                   | Parameter coding |      |      |
|---------------------------------------------|-------------------|------------------|------|------|
|                                             |                   | (24)             | (25) | (26) |
| bv2 belastning vs paoncil halva intervallet | 1 medelbelastning |                  |      |      |
|                                             | 2 underbelastning |                  |      |      |
|                                             | 3 överbelastning  |                  |      |      |

**Categorical Variables Codings**

|                                             |                   | Parameter coding |      |      |
|---------------------------------------------|-------------------|------------------|------|------|
|                                             |                   | (27)             | (28) | (29) |
| bv2 belastning vs paoncil halva intervallet | 1 medelbelastning |                  |      |      |
|                                             | 2 underbelastning |                  |      |      |
|                                             | 3 överbelastning  |                  |      |      |

**Categorical Variables Codings**

|                                             |                   | Parameter coding |      |      |
|---------------------------------------------|-------------------|------------------|------|------|
|                                             |                   | (30)             | (31) | (32) |
| bv2 belastning vs paoncil halva intervallet | 1 medelbelastning |                  |      |      |
|                                             | 2 underbelastning |                  |      |      |
|                                             | 3 överbelastning  |                  |      |      |

**Categorical Variables Codings**

|                                             |                   | Parameter coding |      |      |
|---------------------------------------------|-------------------|------------------|------|------|
|                                             |                   | (33)             | (34) | (35) |
| bv2 belastning vs paoncil halva intervallet | 1 medelbelastning |                  |      |      |
|                                             | 2 underbelastning |                  |      |      |
|                                             | 3 överbelastning  |                  |      |      |

**Block 0: Beginning Block**



Classification Table<sup>a,b</sup>

|        |                                                   |                                                              |
|--------|---------------------------------------------------|--------------------------------------------------------------|
|        | Observed                                          |                                                              |
| Step 0 | seuraust3 seuraus highest = haitta (i någon form) | 0 ingen händelse eller ei haittaa<br>1 haitta (i någon form) |
|        | Overall Percentage                                |                                                              |

Classification Table<sup>a,b</sup>

|        |                                                   |                                                              |                                   |
|--------|---------------------------------------------------|--------------------------------------------------------------|-----------------------------------|
|        |                                                   |                                                              | Predicted                         |
|        |                                                   |                                                              | seuraust3 seuraus highest         |
|        |                                                   |                                                              | 0 ingen händelse eller ei haittaa |
|        | Observed                                          |                                                              |                                   |
| Step 0 | seuraust3 seuraus highest = haitta (i någon form) | 0 ingen händelse eller ei haittaa<br>1 haitta (i någon form) | 12075<br>400                      |
|        | Overall Percentage                                |                                                              |                                   |

Classification Table<sup>a,b</sup>

|        |                                                   |                                                              |                              |
|--------|---------------------------------------------------|--------------------------------------------------------------|------------------------------|
|        |                                                   |                                                              | Predicted                    |
|        |                                                   |                                                              | seuraust3 seuraus highest .. |
|        |                                                   |                                                              | 1 haitta (i någon form)      |
|        | Observed                                          |                                                              |                              |
| Step 0 | seuraust3 seuraus highest = haitta (i någon form) | 0 ingen händelse eller ei haittaa<br>1 haitta (i någon form) | 0<br>0                       |
|        | Overall Percentage                                |                                                              |                              |

Classification Table<sup>a,b</sup>

|        |                                                   |                                                              |                    |
|--------|---------------------------------------------------|--------------------------------------------------------------|--------------------|
|        |                                                   |                                                              | Predicted          |
|        |                                                   |                                                              |                    |
|        |                                                   |                                                              | Percentage Correct |
|        | Observed                                          |                                                              |                    |
| Step 0 | seuraust3 seuraus highest = haitta (i någon form) | 0 ingen händelse eller ei haittaa<br>1 haitta (i någon form) | 100,0<br>,0        |
|        | Overall Percentage                                |                                                              | 96,8               |

a. Constant is included in the model.

b. The cut value is ,500

## Variables in the Equation

|                 | B      | S.E. | Wald     | df | Sig. | Exp(B) |
|-----------------|--------|------|----------|----|------|--------|
| Step 0 Constant | -3,407 | ,051 | 4495,313 | 1  | ,000 | ,033   |

## Variables not in the Equation

|                  | Score   | df | Sig. |
|------------------|---------|----|------|
| Step 0 Variables |         |    |      |
| bv2              | 10,042  | 2  | ,007 |
| bv2(1)           | 8,044   | 1  | ,005 |
| bv2(2)           | 8,351   | 1  | ,004 |
| VASTY2           | 321,056 | 35 | ,000 |
| VASTY2(1)        | 1,769   | 1  | ,184 |
| VASTY2(2)        | 27,206  | 1  | ,000 |
| VASTY2(3)        | 8,562   | 1  | ,003 |
| VASTY2(4)        | ,988    | 1  | ,320 |
| VASTY2(5)        | ,587    | 1  | ,444 |
| VASTY2(6)        | 8,528   | 1  | ,003 |
| VASTY2(7)        | 2,666   | 1  | ,103 |
| VASTY2(8)        | ,008    | 1  | ,929 |
| VASTY2(9)        | 19,221  | 1  | ,000 |
| VASTY2(10)       | 58,192  | 1  | ,000 |
| VASTY2(11)       | 21,278  | 1  | ,000 |
| VASTY2(12)       | 2,551   | 1  | ,110 |
| VASTY2(13)       | 62,883  | 1  | ,000 |
| VASTY2(14)       | ,045    | 1  | ,832 |
| VASTY2(15)       | 8,562   | 1  | ,003 |
| VASTY2(16)       | 1,322   | 1  | ,250 |
| VASTY2(17)       | 2,012   | 1  | ,156 |
| VASTY2(18)       | 6,791   | 1  | ,009 |
| VASTY2(19)       | 10,418  | 1  | ,001 |
| VASTY2(20)       | ,662    | 1  | ,416 |
| VASTY2(21)       | 8,562   | 1  | ,003 |
| VASTY2(22)       | 5,396   | 1  | ,020 |
| VASTY2(23)       | ,045    | 1  | ,832 |
| VASTY2(24)       | 5,427   | 1  | ,020 |
| VASTY2(25)       | 6,092   | 1  | ,014 |
| VASTY2(26)       | 7,868   | 1  | ,005 |
| VASTY2(27)       | 5,427   | 1  | ,020 |
| VASTY2(28)       | ,715    | 1  | ,398 |
| VASTY2(29)       | 2,983   | 1  | ,084 |
| VASTY2(30)       | 2,034   | 1  | ,154 |
| VASTY2(31)       | 30,255  | 1  | ,000 |
| VASTY2(32)       | 1,902   | 1  | ,168 |
| VASTY2(33)       | 1,968   | 1  | ,161 |
| VASTY2(34)       | 6,856   | 1  | ,009 |
| VASTY2(35)       | ,127    | 1  | ,722 |

**Variables not in the Equation**

|                    | Score   | df | Sig. |
|--------------------|---------|----|------|
| Overall Statistics | 323,036 | 37 | ,000 |

**Block 1: Method = Enter**

**Omnibus Tests of Model Coefficients**

|             | Chi-square | df | Sig. |
|-------------|------------|----|------|
| Step 1 Step | 297,735    | 37 | ,000 |
| Block       | 297,735    | 37 | ,000 |
| Model       | 297,735    | 37 | ,000 |

**Model Summary**

| Step | -2 Log likelihood     | Cox & Snell R Square | Nagelkerke R Square |
|------|-----------------------|----------------------|---------------------|
| 1    | 3241,314 <sup>a</sup> | ,024                 | ,095                |

a. Estimation terminated at iteration number 9 because parameter estimates changed by less than ,001.

**Classification Table<sup>a</sup>**

| Observed           |                                                    |                                                              |
|--------------------|----------------------------------------------------|--------------------------------------------------------------|
| Step 1             | seorauslt3 seoraus highest = haitta (i någon form) | 0 ingen händelse eller ei haittaa<br>1 haitta (i någon form) |
| Overall Percentage |                                                    |                                                              |

**Classification Table<sup>a</sup>**

|                    |                                                    | Predicted                         |
|--------------------|----------------------------------------------------|-----------------------------------|
|                    |                                                    | seorauslt3 seoraus highest        |
|                    |                                                    | 0 ingen händelse eller ei haittaa |
| Step 1             | seorauslt3 seoraus highest = haitta (i någon form) | 12075<br>400                      |
| Overall Percentage |                                                    |                                   |

Classification Table<sup>a</sup>

| Observed           |                                                    |                                                              | Predicted                        |                            |
|--------------------|----------------------------------------------------|--------------------------------------------------------------|----------------------------------|----------------------------|
|                    |                                                    |                                                              | seurauslt3<br>seuraus highest .. | 1 haitta (i<br>någon form) |
| Step 1             | seurauslt3 seuraus highest = haitta (i någon form) | 0 ingen händelse eller ei haittaa<br>1 haitta (i någon form) | 0                                | 0                          |
| Overall Percentage |                                                    |                                                              |                                  |                            |

Classification Table<sup>a</sup>

| Observed           |                                                    |                                                              | Predicted          |    |
|--------------------|----------------------------------------------------|--------------------------------------------------------------|--------------------|----|
|                    |                                                    |                                                              | Percentage Correct |    |
| Step 1             | seurauslt3 seuraus highest = haitta (i någon form) | 0 ingen händelse eller ei haittaa<br>1 haitta (i någon form) | 100,0              | ,0 |
| Overall Percentage |                                                    |                                                              | 96,8               |    |

a. The cut value is ,500

Variables in the Equation

|                     |            | B      | S.E. | Wald    | df | Sig. | Exp(B) |
|---------------------|------------|--------|------|---------|----|------|--------|
| Step 1 <sup>a</sup> | bv2        |        |      | 1,904   | 2  | ,386 |        |
|                     | bv2(1)     | ,023   | ,149 | ,023    | 1  | ,879 | 1,023  |
|                     | bv2(2)     | ,161   | ,135 | 1,416   | 1  | ,234 | 1,174  |
|                     | VASTY2     |        |      | 226,913 | 35 | ,000 |        |
|                     | VASTY2(1)  | ,590   | ,424 | 1,939   | 1  | ,164 | 1,804  |
|                     | VASTY2(2)  | 1,208  | ,390 | 9,621   | 1  | ,002 | 3,347  |
|                     | VASTY2(3)  | -1,592 | ,787 | 4,094   | 1  | ,043 | ,203   |
|                     | VASTY2(4)  | ,472   | ,430 | 1,202   | 1  | ,273 | 1,603  |
|                     | VASTY2(5)  | ,454   | ,441 | 1,058   | 1  | ,304 | 1,574  |
|                     | VASTY2(6)  | -1,565 | ,786 | 3,965   | 1  | ,046 | ,209   |
|                     | VASTY2(7)  | ,587   | ,423 | 1,923   | 1  | ,165 | 1,798  |
|                     | VASTY2(8)  | ,259   | ,448 | ,333    | 1  | ,564 | 1,295  |
|                     | VASTY2(9)  | 1,098  | ,398 | 7,622   | 1  | ,006 | 2,998  |
|                     | VASTY2(10) | 1,470  | ,380 | 14,928  | 1  | ,000 | 4,347  |
|                     | VASTY2(11) | 1,134  | ,393 | 8,342   | 1  | ,004 | 3,107  |
|                     | VASTY2(12) | ,630   | ,420 | 2,250   | 1  | ,134 | 1,877  |
|                     | VASTY2(13) | 1,461  | ,382 | 14,620  | 1  | ,000 | 4,309  |
|                     | VASTY2(14) | ,165   | ,457 | ,131    | 1  | ,718 | 1,179  |
|                     | VASTY2(15) | -1,555 | ,786 | 3,916   | 1  | ,048 | ,211   |
|                     | VASTY2(16) | -,406  | ,673 | ,364    | 1  | ,546 | ,666   |

## Variables in the Equation

|                     |            | 95% C.I. for EXP(B) |       |
|---------------------|------------|---------------------|-------|
|                     |            | Lower               | Upper |
| Step 1 <sup>a</sup> | bv2        |                     |       |
|                     | bv2(1)     | ,764                | 1,370 |
|                     | bv2(2)     | ,901                | 1,530 |
|                     | VASTY2     |                     |       |
|                     | VASTY2(1)  | ,786                | 4,138 |
|                     | VASTY2(2)  | 1,560               | 7,182 |
|                     | VASTY2(3)  | ,044                | ,951  |
|                     | VASTY2(4)  | ,690                | 3,727 |
|                     | VASTY2(5)  | ,663                | 3,736 |
|                     | VASTY2(6)  | ,045                | ,976  |
|                     | VASTY2(7)  | ,785                | 4,122 |
|                     | VASTY2(8)  | ,538                | 3,119 |
|                     | VASTY2(9)  | 1,375               | 6,538 |
|                     | VASTY2(10) | 2,063               | 9,162 |
|                     | VASTY2(11) | 1,440               | 6,707 |
|                     | VASTY2(12) | ,824                | 4,275 |
|                     | VASTY2(13) | 2,038               | 9,112 |
|                     | VASTY2(14) | ,482                | 2,887 |
|                     | VASTY2(15) | ,045                | ,985  |
|                     | VASTY2(16) | ,178                | 2,493 |

review only

## Variables in the Equation

|            | B      | S.E.  | Wald    | df | Sig. | Exp(B) |
|------------|--------|-------|---------|----|------|--------|
| VASTY2(17) | -,261  | ,510  | ,262    | 1  | ,609 | ,770   |
| VASTY2(18) | -1,125 | ,671  | 2,809   | 1  | ,094 | ,325   |
| VASTY2(19) | -2,191 | 1,059 | 4,282   | 1  | ,039 | ,112   |
| VASTY2(20) | ,462   | ,449  | 1,057   | 1  | ,304 | 1,587  |
| VASTY2(21) | -1,547 | ,786  | 3,881   | 1  | ,049 | ,213   |
| VASTY2(22) | -,794  | ,607  | 1,715   | 1  | ,190 | ,452   |
| VASTY2(23) | ,207   | ,456  | ,207    | 1  | ,649 | 1,230  |
| VASTY2(24) | -,884  | ,607  | 2,123   | 1  | ,145 | ,413   |
| VASTY2(25) | -1,292 | ,786  | 2,704   | 1  | ,100 | ,275   |
| VASTY2(26) | -2,030 | 1,057 | 3,684   | 1  | ,055 | ,131   |
| VASTY2(27) | -,878  | ,607  | 2,092   | 1  | ,148 | ,416   |
| VASTY2(28) | -,153  | ,566  | ,073    | 1  | ,787 | ,858   |
| VASTY2(29) | -,437  | ,533  | ,673    | 1  | ,412 | ,646   |
| VASTY2(30) | -,281  | ,510  | ,303    | 1  | ,582 | ,755   |
| VASTY2(31) | 1,235  | ,388  | 10,110  | 1  | ,001 | 3,439  |
| VASTY2(32) | -,250  | ,510  | ,240    | 1  | ,624 | ,779   |
| VASTY2(33) | -,259  | ,510  | ,259    | 1  | ,611 | ,772   |
| VASTY2(34) | -1,128 | ,671  | 2,824   | 1  | ,093 | ,324   |
| VASTY2(35) | ,092   | ,480  | ,036    | 1  | ,849 | 1,096  |
| Constant   | -3,728 | ,349  | 114,019 | 1  | ,000 | ,024   |

## Variables in the Equation

|            | 95% C.I. for EXP(B) |       |
|------------|---------------------|-------|
|            | Lower               | Upper |
| VASTY2(17) | ,284                | 2,093 |
| VASTY2(18) | ,087                | 1,210 |
| VASTY2(19) | ,014                | ,891  |
| VASTY2(20) | ,658                | 3,828 |
| VASTY2(21) | ,046                | ,992  |
| VASTY2(22) | ,138                | 1,484 |
| VASTY2(23) | ,504                | 3,006 |
| VASTY2(24) | ,126                | 1,357 |
| VASTY2(25) | ,059                | 1,281 |
| VASTY2(26) | ,017                | 1,044 |
| VASTY2(27) | ,127                | 1,365 |
| VASTY2(28) | ,283                | 2,602 |
| VASTY2(29) | ,227                | 1,835 |
| VASTY2(30) | ,278                | 2,051 |
| VASTY2(31) | 1,606               | 7,364 |
| VASTY2(32) | ,286                | 2,116 |
| VASTY2(33) | ,284                | 2,096 |
| VASTY2(34) | ,087                | 1,206 |
| VASTY2(35) | ,428                | 2,807 |
| Constant   |                     |       |

a. Variable(s) entered on step 1: bv2, VASTY2.

```
LOGISTIC REGRESSION VARIABLES seurauslt3
/METHOD=ENTER bv3 VASTY2
/CONTRAST (bv3)=Indicator(1)
/CONTRAST (VASTY2)=Indicator(1)
/PRINT=CI(95)
/CRITERIA=PIN(0.05) POUT(0.10) ITERATE(20) CUT(0.5).
```

## Logistic Regression

[DataSet6] C:\cWordjan\Rafaela\_VCS\alla\_tillsammans\abo\_bjo\_vasa\_v1.sav

### Case Processing Summary

| Unweighted Cases <sup>a</sup> |                      | N     | Percent |
|-------------------------------|----------------------|-------|---------|
| Selected Cases                | Included in Analysis | 12475 | 100,0   |
|                               | Missing Cases        | 0     | ,0      |
|                               | Total                | 12475 | 100,0   |
| Unselected Cases              |                      | 0     | ,0      |
| Total                         |                      | 12475 | 100,0   |

a. If weight is in effect, see classification table for the total number of cases.

## Dependent Variable Encoding

| Original Value                    | Internal Value |
|-----------------------------------|----------------|
| 0 ingen hendelse eller ei haittaa | 0              |
| 1 haitta (i någon form)           | 1              |

## Categorical Variables Codings

|                           |           | Frequency | Parameter coding |       |
|---------------------------|-----------|-----------|------------------|-------|
|                           |           |           | (1)              | (2)   |
| VASTY2 (SAIR*10000)+VASTY | 403073101 | 365       | ,000             | ,000  |
|                           | 403073102 | 362       | 1,000            | ,000  |
|                           | 403073103 | 365       | ,000             | 1,000 |
|                           | 403073202 | 365       | ,000             | ,000  |
|                           | 403073203 | 365       | ,000             | ,000  |
|                           | 403073204 | 330       | ,000             | ,000  |
|                           | 403073303 | 364       | ,000             | ,000  |
|                           | 403073651 | 362       | ,000             | ,000  |
|                           | 403073771 | 365       | ,000             | ,000  |
|                           | 403133102 | 341       | ,000             | ,000  |
|                           | 403133106 | 365       | ,000             | ,000  |
|                           | 403133107 | 365       | ,000             | ,000  |
|                           | 403133109 | 365       | ,000             | ,000  |
|                           | 403133202 | 365       | ,000             | ,000  |
|                           | 403133203 | 365       | ,000             | ,000  |
|                           | 403133204 | 365       | ,000             | ,000  |
|                           | 403133315 | 177       | ,000             | ,000  |
|                           | 403133322 | 365       | ,000             | ,000  |
|                           | 403133401 | 362       | ,000             | ,000  |
|                           | 403133402 | 365       | ,000             | ,000  |
|                           | 403133550 | 298       | ,000             | ,000  |
|                           | 403133772 | 365       | ,000             | ,000  |
|                           | 403135803 | 365       | ,000             | ,000  |
|                           | 404060001 | 365       | ,000             | ,000  |
|                           | 404060002 | 366       | ,000             | ,000  |
|                           | 404310003 | 291       | ,000             | ,000  |
|                           | 404310004 | 291       | ,000             | ,000  |
|                           | 502300005 | 366       | ,000             | ,000  |
|                           | 502300006 | 225       | ,000             | ,000  |
|                           | 502300007 | 366       | ,000             | ,000  |
|                           | 502300214 | 366       | ,000             | ,000  |
|                           | 502300411 | 366       | ,000             | ,000  |
|                           | 502300415 | 360       | ,000             | ,000  |
|                           | 502300416 | 363       | ,000             | ,000  |
|                           | 502300811 | 364       | ,000             | ,000  |
|                           | 502300913 | 315       | ,000             | ,000  |



**Categorical Variables Codings**

|                           |           | Parameter coding |       |       |
|---------------------------|-----------|------------------|-------|-------|
|                           |           | (3)              | (4)   | (5)   |
| VASTY2 (SAIR*10000)+VASTY | 403073101 | ,000             | ,000  | ,000  |
|                           | 403073102 | ,000             | ,000  | ,000  |
|                           | 403073103 | ,000             | ,000  | ,000  |
|                           | 403073202 | 1,000            | ,000  | ,000  |
|                           | 403073203 | ,000             | 1,000 | ,000  |
|                           | 403073204 | ,000             | ,000  | 1,000 |
|                           | 403073303 | ,000             | ,000  | ,000  |
|                           | 403073651 | ,000             | ,000  | ,000  |
|                           | 403073771 | ,000             | ,000  | ,000  |
|                           | 403133102 | ,000             | ,000  | ,000  |
|                           | 403133106 | ,000             | ,000  | ,000  |
|                           | 403133107 | ,000             | ,000  | ,000  |
|                           | 403133109 | ,000             | ,000  | ,000  |
|                           | 403133202 | ,000             | ,000  | ,000  |
|                           | 403133203 | ,000             | ,000  | ,000  |
|                           | 403133204 | ,000             | ,000  | ,000  |
|                           | 403133315 | ,000             | ,000  | ,000  |
|                           | 403133322 | ,000             | ,000  | ,000  |
|                           | 403133401 | ,000             | ,000  | ,000  |
|                           | 403133402 | ,000             | ,000  | ,000  |
|                           | 403133550 | ,000             | ,000  | ,000  |
|                           | 403133772 | ,000             | ,000  | ,000  |
|                           | 403135803 | ,000             | ,000  | ,000  |
|                           | 404060001 | ,000             | ,000  | ,000  |
|                           | 404060002 | ,000             | ,000  | ,000  |
|                           | 404310003 | ,000             | ,000  | ,000  |
|                           | 404310004 | ,000             | ,000  | ,000  |
|                           | 502300005 | ,000             | ,000  | ,000  |
|                           | 502300006 | ,000             | ,000  | ,000  |
|                           | 502300007 | ,000             | ,000  | ,000  |
|                           | 502300214 | ,000             | ,000  | ,000  |
|                           | 502300411 | ,000             | ,000  | ,000  |
|                           | 502300415 | ,000             | ,000  | ,000  |
|                           | 502300416 | ,000             | ,000  | ,000  |
|                           | 502300811 | ,000             | ,000  | ,000  |
|                           | 502300913 | ,000             | ,000  | ,000  |

## Categorical Variables Codings

|                           |           | Parameter coding |       |       |
|---------------------------|-----------|------------------|-------|-------|
|                           |           | (6)              | (7)   | (8)   |
| VASTY2 (SAIR*10000)+VASTY | 403073101 | ,000             | ,000  | ,000  |
|                           | 403073102 | ,000             | ,000  | ,000  |
|                           | 403073103 | ,000             | ,000  | ,000  |
|                           | 403073202 | ,000             | ,000  | ,000  |
|                           | 403073203 | ,000             | ,000  | ,000  |
|                           | 403073204 | ,000             | ,000  | ,000  |
|                           | 403073303 | 1,000            | ,000  | ,000  |
|                           | 403073651 | ,000             | 1,000 | ,000  |
|                           | 403073771 | ,000             | ,000  | 1,000 |
|                           | 403133102 | ,000             | ,000  | ,000  |
|                           | 403133106 | ,000             | ,000  | ,000  |
|                           | 403133107 | ,000             | ,000  | ,000  |
|                           | 403133109 | ,000             | ,000  | ,000  |
|                           | 403133202 | ,000             | ,000  | ,000  |
|                           | 403133203 | ,000             | ,000  | ,000  |
|                           | 403133204 | ,000             | ,000  | ,000  |
|                           | 403133315 | ,000             | ,000  | ,000  |
|                           | 403133322 | ,000             | ,000  | ,000  |
|                           | 403133401 | ,000             | ,000  | ,000  |
|                           | 403133402 | ,000             | ,000  | ,000  |
|                           | 403133550 | ,000             | ,000  | ,000  |
|                           | 403133772 | ,000             | ,000  | ,000  |
|                           | 403135803 | ,000             | ,000  | ,000  |
|                           | 404060001 | ,000             | ,000  | ,000  |
|                           | 404060002 | ,000             | ,000  | ,000  |
|                           | 404310003 | ,000             | ,000  | ,000  |
|                           | 404310004 | ,000             | ,000  | ,000  |
|                           | 502300005 | ,000             | ,000  | ,000  |
|                           | 502300006 | ,000             | ,000  | ,000  |
|                           | 502300007 | ,000             | ,000  | ,000  |
|                           | 502300214 | ,000             | ,000  | ,000  |
|                           | 502300411 | ,000             | ,000  | ,000  |
|                           | 502300415 | ,000             | ,000  | ,000  |
|                           | 502300416 | ,000             | ,000  | ,000  |
|                           | 502300811 | ,000             | ,000  | ,000  |
|                           | 502300913 | ,000             | ,000  | ,000  |

## Categorical Variables Codings

|                           |           | Parameter coding |       |       |
|---------------------------|-----------|------------------|-------|-------|
|                           |           | (9)              | (10)  | (11)  |
| VASTY2 (SAIR*10000)+VASTY | 403073101 | ,000             | ,000  | ,000  |
|                           | 403073102 | ,000             | ,000  | ,000  |
|                           | 403073103 | ,000             | ,000  | ,000  |
|                           | 403073202 | ,000             | ,000  | ,000  |
|                           | 403073203 | ,000             | ,000  | ,000  |
|                           | 403073204 | ,000             | ,000  | ,000  |
|                           | 403073303 | ,000             | ,000  | ,000  |
|                           | 403073651 | ,000             | ,000  | ,000  |
|                           | 403073771 | ,000             | ,000  | ,000  |
|                           | 403133102 | 1,000            | ,000  | ,000  |
|                           | 403133106 | ,000             | 1,000 | ,000  |
|                           | 403133107 | ,000             | ,000  | 1,000 |
|                           | 403133109 | ,000             | ,000  | ,000  |
|                           | 403133202 | ,000             | ,000  | ,000  |
|                           | 403133203 | ,000             | ,000  | ,000  |
|                           | 403133204 | ,000             | ,000  | ,000  |
|                           | 403133315 | ,000             | ,000  | ,000  |
|                           | 403133322 | ,000             | ,000  | ,000  |
|                           | 403133401 | ,000             | ,000  | ,000  |
|                           | 403133402 | ,000             | ,000  | ,000  |
|                           | 403133550 | ,000             | ,000  | ,000  |
|                           | 403133772 | ,000             | ,000  | ,000  |
|                           | 403135803 | ,000             | ,000  | ,000  |
|                           | 404060001 | ,000             | ,000  | ,000  |
|                           | 404060002 | ,000             | ,000  | ,000  |
|                           | 404310003 | ,000             | ,000  | ,000  |
|                           | 404310004 | ,000             | ,000  | ,000  |
|                           | 502300005 | ,000             | ,000  | ,000  |
|                           | 502300006 | ,000             | ,000  | ,000  |
|                           | 502300007 | ,000             | ,000  | ,000  |
|                           | 502300214 | ,000             | ,000  | ,000  |
|                           | 502300411 | ,000             | ,000  | ,000  |
|                           | 502300415 | ,000             | ,000  | ,000  |
|                           | 502300416 | ,000             | ,000  | ,000  |
|                           | 502300811 | ,000             | ,000  | ,000  |
|                           | 502300913 | ,000             | ,000  | ,000  |

## Categorical Variables Codings

|                           |           | Parameter coding |       |       |
|---------------------------|-----------|------------------|-------|-------|
|                           |           | (12)             | (13)  | (14)  |
| VASTY2 (SAIR*10000)+VASTY | 403073101 | ,000             | ,000  | ,000  |
|                           | 403073102 | ,000             | ,000  | ,000  |
|                           | 403073103 | ,000             | ,000  | ,000  |
|                           | 403073202 | ,000             | ,000  | ,000  |
|                           | 403073203 | ,000             | ,000  | ,000  |
|                           | 403073204 | ,000             | ,000  | ,000  |
|                           | 403073303 | ,000             | ,000  | ,000  |
|                           | 403073651 | ,000             | ,000  | ,000  |
|                           | 403073771 | ,000             | ,000  | ,000  |
|                           | 403133102 | ,000             | ,000  | ,000  |
|                           | 403133106 | ,000             | ,000  | ,000  |
|                           | 403133107 | ,000             | ,000  | ,000  |
|                           | 403133109 | 1,000            | ,000  | ,000  |
|                           | 403133202 | ,000             | 1,000 | ,000  |
|                           | 403133203 | ,000             | ,000  | 1,000 |
|                           | 403133204 | ,000             | ,000  | ,000  |
|                           | 403133315 | ,000             | ,000  | ,000  |
|                           | 403133322 | ,000             | ,000  | ,000  |
|                           | 403133401 | ,000             | ,000  | ,000  |
|                           | 403133402 | ,000             | ,000  | ,000  |
|                           | 403133550 | ,000             | ,000  | ,000  |
|                           | 403133772 | ,000             | ,000  | ,000  |
|                           | 403135803 | ,000             | ,000  | ,000  |
|                           | 404060001 | ,000             | ,000  | ,000  |
|                           | 404060002 | ,000             | ,000  | ,000  |
|                           | 404310003 | ,000             | ,000  | ,000  |
|                           | 404310004 | ,000             | ,000  | ,000  |
|                           | 502300005 | ,000             | ,000  | ,000  |
|                           | 502300006 | ,000             | ,000  | ,000  |
|                           | 502300007 | ,000             | ,000  | ,000  |
|                           | 502300214 | ,000             | ,000  | ,000  |
|                           | 502300411 | ,000             | ,000  | ,000  |
|                           | 502300415 | ,000             | ,000  | ,000  |
|                           | 502300416 | ,000             | ,000  | ,000  |
|                           | 502300811 | ,000             | ,000  | ,000  |
|                           | 502300913 | ,000             | ,000  | ,000  |

**Categorical Variables Codings**

|                           |           | Parameter coding |       |       |
|---------------------------|-----------|------------------|-------|-------|
|                           |           | (15)             | (16)  | (17)  |
| VASTY2 (SAIR*10000)+VASTY | 403073101 | ,000             | ,000  | ,000  |
|                           | 403073102 | ,000             | ,000  | ,000  |
|                           | 403073103 | ,000             | ,000  | ,000  |
|                           | 403073202 | ,000             | ,000  | ,000  |
|                           | 403073203 | ,000             | ,000  | ,000  |
|                           | 403073204 | ,000             | ,000  | ,000  |
|                           | 403073303 | ,000             | ,000  | ,000  |
|                           | 403073651 | ,000             | ,000  | ,000  |
|                           | 403073771 | ,000             | ,000  | ,000  |
|                           | 403133102 | ,000             | ,000  | ,000  |
|                           | 403133106 | ,000             | ,000  | ,000  |
|                           | 403133107 | ,000             | ,000  | ,000  |
|                           | 403133109 | ,000             | ,000  | ,000  |
|                           | 403133202 | ,000             | ,000  | ,000  |
|                           | 403133203 | ,000             | ,000  | ,000  |
|                           | 403133204 | 1,000            | ,000  | ,000  |
|                           | 403133315 | ,000             | 1,000 | ,000  |
|                           | 403133322 | ,000             | ,000  | 1,000 |
|                           | 403133401 | ,000             | ,000  | ,000  |
|                           | 403133402 | ,000             | ,000  | ,000  |
|                           | 403133550 | ,000             | ,000  | ,000  |
|                           | 403133772 | ,000             | ,000  | ,000  |
|                           | 403135803 | ,000             | ,000  | ,000  |
|                           | 404060001 | ,000             | ,000  | ,000  |
|                           | 404060002 | ,000             | ,000  | ,000  |
|                           | 404310003 | ,000             | ,000  | ,000  |
|                           | 404310004 | ,000             | ,000  | ,000  |
|                           | 502300005 | ,000             | ,000  | ,000  |
|                           | 502300006 | ,000             | ,000  | ,000  |
|                           | 502300007 | ,000             | ,000  | ,000  |
|                           | 502300214 | ,000             | ,000  | ,000  |
|                           | 502300411 | ,000             | ,000  | ,000  |
|                           | 502300415 | ,000             | ,000  | ,000  |
|                           | 502300416 | ,000             | ,000  | ,000  |
|                           | 502300811 | ,000             | ,000  | ,000  |
|                           | 502300913 | ,000             | ,000  | ,000  |

## Categorical Variables Codings

|                           |           | Parameter coding |       |       |
|---------------------------|-----------|------------------|-------|-------|
|                           |           | (18)             | (19)  | (20)  |
| VASTY2 (SAIR*10000)+VASTY | 403073101 | ,000             | ,000  | ,000  |
|                           | 403073102 | ,000             | ,000  | ,000  |
|                           | 403073103 | ,000             | ,000  | ,000  |
|                           | 403073202 | ,000             | ,000  | ,000  |
|                           | 403073203 | ,000             | ,000  | ,000  |
|                           | 403073204 | ,000             | ,000  | ,000  |
|                           | 403073303 | ,000             | ,000  | ,000  |
|                           | 403073651 | ,000             | ,000  | ,000  |
|                           | 403073771 | ,000             | ,000  | ,000  |
|                           | 403133102 | ,000             | ,000  | ,000  |
|                           | 403133106 | ,000             | ,000  | ,000  |
|                           | 403133107 | ,000             | ,000  | ,000  |
|                           | 403133109 | ,000             | ,000  | ,000  |
|                           | 403133202 | ,000             | ,000  | ,000  |
|                           | 403133203 | ,000             | ,000  | ,000  |
|                           | 403133204 | ,000             | ,000  | ,000  |
|                           | 403133315 | ,000             | ,000  | ,000  |
|                           | 403133322 | ,000             | ,000  | ,000  |
|                           | 403133401 | 1,000            | ,000  | ,000  |
|                           | 403133402 | ,000             | 1,000 | ,000  |
|                           | 403133550 | ,000             | ,000  | 1,000 |
|                           | 403133772 | ,000             | ,000  | ,000  |
|                           | 403135803 | ,000             | ,000  | ,000  |
|                           | 404060001 | ,000             | ,000  | ,000  |
|                           | 404060002 | ,000             | ,000  | ,000  |
|                           | 404310003 | ,000             | ,000  | ,000  |
|                           | 404310004 | ,000             | ,000  | ,000  |
|                           | 502300005 | ,000             | ,000  | ,000  |
|                           | 502300006 | ,000             | ,000  | ,000  |
|                           | 502300007 | ,000             | ,000  | ,000  |
|                           | 502300214 | ,000             | ,000  | ,000  |
|                           | 502300411 | ,000             | ,000  | ,000  |
|                           | 502300415 | ,000             | ,000  | ,000  |
|                           | 502300416 | ,000             | ,000  | ,000  |
|                           | 502300811 | ,000             | ,000  | ,000  |
|                           | 502300913 | ,000             | ,000  | ,000  |

**Categorical Variables Codings**

|                           |           | Parameter coding |       |       |
|---------------------------|-----------|------------------|-------|-------|
|                           |           | (21)             | (22)  | (23)  |
| VASTY2 (SAIR*10000)+VASTY | 403073101 | ,000             | ,000  | ,000  |
|                           | 403073102 | ,000             | ,000  | ,000  |
|                           | 403073103 | ,000             | ,000  | ,000  |
|                           | 403073202 | ,000             | ,000  | ,000  |
|                           | 403073203 | ,000             | ,000  | ,000  |
|                           | 403073204 | ,000             | ,000  | ,000  |
|                           | 403073303 | ,000             | ,000  | ,000  |
|                           | 403073651 | ,000             | ,000  | ,000  |
|                           | 403073771 | ,000             | ,000  | ,000  |
|                           | 403133102 | ,000             | ,000  | ,000  |
|                           | 403133106 | ,000             | ,000  | ,000  |
|                           | 403133107 | ,000             | ,000  | ,000  |
|                           | 403133109 | ,000             | ,000  | ,000  |
|                           | 403133202 | ,000             | ,000  | ,000  |
|                           | 403133203 | ,000             | ,000  | ,000  |
|                           | 403133204 | ,000             | ,000  | ,000  |
|                           | 403133315 | ,000             | ,000  | ,000  |
|                           | 403133322 | ,000             | ,000  | ,000  |
|                           | 403133401 | ,000             | ,000  | ,000  |
|                           | 403133402 | ,000             | ,000  | ,000  |
|                           | 403133550 | ,000             | ,000  | ,000  |
|                           | 403133772 | 1,000            | ,000  | ,000  |
|                           | 403135803 | ,000             | 1,000 | ,000  |
|                           | 404060001 | ,000             | ,000  | 1,000 |
|                           | 404060002 | ,000             | ,000  | ,000  |
|                           | 404310003 | ,000             | ,000  | ,000  |
|                           | 404310004 | ,000             | ,000  | ,000  |
|                           | 502300005 | ,000             | ,000  | ,000  |
|                           | 502300006 | ,000             | ,000  | ,000  |
|                           | 502300007 | ,000             | ,000  | ,000  |
|                           | 502300214 | ,000             | ,000  | ,000  |
|                           | 502300411 | ,000             | ,000  | ,000  |
|                           | 502300415 | ,000             | ,000  | ,000  |
|                           | 502300416 | ,000             | ,000  | ,000  |
|                           | 502300811 | ,000             | ,000  | ,000  |
|                           | 502300913 | ,000             | ,000  | ,000  |

## Categorical Variables Codings

|                           |           | Parameter coding |       |       |
|---------------------------|-----------|------------------|-------|-------|
|                           |           | (24)             | (25)  | (26)  |
| VASTY2 (SAIR*10000)+VASTY | 403073101 | ,000             | ,000  | ,000  |
|                           | 403073102 | ,000             | ,000  | ,000  |
|                           | 403073103 | ,000             | ,000  | ,000  |
|                           | 403073202 | ,000             | ,000  | ,000  |
|                           | 403073203 | ,000             | ,000  | ,000  |
|                           | 403073204 | ,000             | ,000  | ,000  |
|                           | 403073303 | ,000             | ,000  | ,000  |
|                           | 403073651 | ,000             | ,000  | ,000  |
|                           | 403073771 | ,000             | ,000  | ,000  |
|                           | 403133102 | ,000             | ,000  | ,000  |
|                           | 403133106 | ,000             | ,000  | ,000  |
|                           | 403133107 | ,000             | ,000  | ,000  |
|                           | 403133109 | ,000             | ,000  | ,000  |
|                           | 403133202 | ,000             | ,000  | ,000  |
|                           | 403133203 | ,000             | ,000  | ,000  |
|                           | 403133204 | ,000             | ,000  | ,000  |
|                           | 403133315 | ,000             | ,000  | ,000  |
|                           | 403133322 | ,000             | ,000  | ,000  |
|                           | 403133401 | ,000             | ,000  | ,000  |
|                           | 403133402 | ,000             | ,000  | ,000  |
|                           | 403133550 | ,000             | ,000  | ,000  |
|                           | 403133772 | ,000             | ,000  | ,000  |
|                           | 403135803 | ,000             | ,000  | ,000  |
|                           | 404060001 | ,000             | ,000  | ,000  |
|                           | 404060002 | 1,000            | ,000  | ,000  |
|                           | 404310003 | ,000             | 1,000 | ,000  |
|                           | 404310004 | ,000             | ,000  | 1,000 |
|                           | 502300005 | ,000             | ,000  | ,000  |
|                           | 502300006 | ,000             | ,000  | ,000  |
|                           | 502300007 | ,000             | ,000  | ,000  |
|                           | 502300214 | ,000             | ,000  | ,000  |
|                           | 502300411 | ,000             | ,000  | ,000  |
|                           | 502300415 | ,000             | ,000  | ,000  |
|                           | 502300416 | ,000             | ,000  | ,000  |
|                           | 502300811 | ,000             | ,000  | ,000  |
|                           | 502300913 | ,000             | ,000  | ,000  |



**Categorical Variables Codings**

|                           |           | Parameter coding |       |       |
|---------------------------|-----------|------------------|-------|-------|
|                           |           | (27)             | (28)  | (29)  |
| VASTY2 (SAIR*10000)+VASTY | 403073101 | ,000             | ,000  | ,000  |
|                           | 403073102 | ,000             | ,000  | ,000  |
|                           | 403073103 | ,000             | ,000  | ,000  |
|                           | 403073202 | ,000             | ,000  | ,000  |
|                           | 403073203 | ,000             | ,000  | ,000  |
|                           | 403073204 | ,000             | ,000  | ,000  |
|                           | 403073303 | ,000             | ,000  | ,000  |
|                           | 403073651 | ,000             | ,000  | ,000  |
|                           | 403073771 | ,000             | ,000  | ,000  |
|                           | 403133102 | ,000             | ,000  | ,000  |
|                           | 403133106 | ,000             | ,000  | ,000  |
|                           | 403133107 | ,000             | ,000  | ,000  |
|                           | 403133109 | ,000             | ,000  | ,000  |
|                           | 403133202 | ,000             | ,000  | ,000  |
|                           | 403133203 | ,000             | ,000  | ,000  |
|                           | 403133204 | ,000             | ,000  | ,000  |
|                           | 403133315 | ,000             | ,000  | ,000  |
|                           | 403133322 | ,000             | ,000  | ,000  |
|                           | 403133401 | ,000             | ,000  | ,000  |
|                           | 403133402 | ,000             | ,000  | ,000  |
|                           | 403133550 | ,000             | ,000  | ,000  |
|                           | 403133772 | ,000             | ,000  | ,000  |
|                           | 403135803 | ,000             | ,000  | ,000  |
|                           | 404060001 | ,000             | ,000  | ,000  |
|                           | 404060002 | ,000             | ,000  | ,000  |
|                           | 404310003 | ,000             | ,000  | ,000  |
|                           | 404310004 | ,000             | ,000  | ,000  |
|                           | 502300005 | 1,000            | ,000  | ,000  |
|                           | 502300006 | ,000             | 1,000 | ,000  |
|                           | 502300007 | ,000             | ,000  | 1,000 |
|                           | 502300214 | ,000             | ,000  | ,000  |
|                           | 502300411 | ,000             | ,000  | ,000  |
|                           | 502300415 | ,000             | ,000  | ,000  |
|                           | 502300416 | ,000             | ,000  | ,000  |
|                           | 502300811 | ,000             | ,000  | ,000  |
|                           | 502300913 | ,000             | ,000  | ,000  |

## Categorical Variables Codings

|                           |           | Parameter coding |       |       |
|---------------------------|-----------|------------------|-------|-------|
|                           |           | (30)             | (31)  | (32)  |
| VASTY2 (SAIR*10000)+VASTY | 403073101 | ,000             | ,000  | ,000  |
|                           | 403073102 | ,000             | ,000  | ,000  |
|                           | 403073103 | ,000             | ,000  | ,000  |
|                           | 403073202 | ,000             | ,000  | ,000  |
|                           | 403073203 | ,000             | ,000  | ,000  |
|                           | 403073204 | ,000             | ,000  | ,000  |
|                           | 403073303 | ,000             | ,000  | ,000  |
|                           | 403073651 | ,000             | ,000  | ,000  |
|                           | 403073771 | ,000             | ,000  | ,000  |
|                           | 403133102 | ,000             | ,000  | ,000  |
|                           | 403133106 | ,000             | ,000  | ,000  |
|                           | 403133107 | ,000             | ,000  | ,000  |
|                           | 403133109 | ,000             | ,000  | ,000  |
|                           | 403133202 | ,000             | ,000  | ,000  |
|                           | 403133203 | ,000             | ,000  | ,000  |
|                           | 403133204 | ,000             | ,000  | ,000  |
|                           | 403133315 | ,000             | ,000  | ,000  |
|                           | 403133322 | ,000             | ,000  | ,000  |
|                           | 403133401 | ,000             | ,000  | ,000  |
|                           | 403133402 | ,000             | ,000  | ,000  |
|                           | 403133550 | ,000             | ,000  | ,000  |
|                           | 403133772 | ,000             | ,000  | ,000  |
|                           | 403135803 | ,000             | ,000  | ,000  |
|                           | 404060001 | ,000             | ,000  | ,000  |
|                           | 404060002 | ,000             | ,000  | ,000  |
|                           | 404310003 | ,000             | ,000  | ,000  |
|                           | 404310004 | ,000             | ,000  | ,000  |
|                           | 502300005 | ,000             | ,000  | ,000  |
|                           | 502300006 | ,000             | ,000  | ,000  |
|                           | 502300007 | ,000             | ,000  | ,000  |
|                           | 502300214 | 1,000            | ,000  | ,000  |
|                           | 502300411 | ,000             | 1,000 | ,000  |
|                           | 502300415 | ,000             | ,000  | 1,000 |
|                           | 502300416 | ,000             | ,000  | ,000  |
|                           | 502300811 | ,000             | ,000  | ,000  |
|                           | 502300913 | ,000             | ,000  | ,000  |

**Categorical Variables Codings**

|                           |           | Parameter coding |       |       |
|---------------------------|-----------|------------------|-------|-------|
|                           |           | (33)             | (34)  | (35)  |
| VASTY2 (SAIR*10000)+VASTY | 403073101 | ,000             | ,000  | ,000  |
|                           | 403073102 | ,000             | ,000  | ,000  |
|                           | 403073103 | ,000             | ,000  | ,000  |
|                           | 403073202 | ,000             | ,000  | ,000  |
|                           | 403073203 | ,000             | ,000  | ,000  |
|                           | 403073204 | ,000             | ,000  | ,000  |
|                           | 403073303 | ,000             | ,000  | ,000  |
|                           | 403073651 | ,000             | ,000  | ,000  |
|                           | 403073771 | ,000             | ,000  | ,000  |
|                           | 403133102 | ,000             | ,000  | ,000  |
|                           | 403133106 | ,000             | ,000  | ,000  |
|                           | 403133107 | ,000             | ,000  | ,000  |
|                           | 403133109 | ,000             | ,000  | ,000  |
|                           | 403133202 | ,000             | ,000  | ,000  |
|                           | 403133203 | ,000             | ,000  | ,000  |
|                           | 403133204 | ,000             | ,000  | ,000  |
|                           | 403133315 | ,000             | ,000  | ,000  |
|                           | 403133322 | ,000             | ,000  | ,000  |
|                           | 403133401 | ,000             | ,000  | ,000  |
|                           | 403133402 | ,000             | ,000  | ,000  |
|                           | 403133550 | ,000             | ,000  | ,000  |
|                           | 403133772 | ,000             | ,000  | ,000  |
|                           | 403135803 | ,000             | ,000  | ,000  |
|                           | 404060001 | ,000             | ,000  | ,000  |
|                           | 404060002 | ,000             | ,000  | ,000  |
|                           | 404310003 | ,000             | ,000  | ,000  |
|                           | 404310004 | ,000             | ,000  | ,000  |
|                           | 502300005 | ,000             | ,000  | ,000  |
|                           | 502300006 | ,000             | ,000  | ,000  |
|                           | 502300007 | ,000             | ,000  | ,000  |
|                           | 502300214 | ,000             | ,000  | ,000  |
|                           | 502300411 | ,000             | ,000  | ,000  |
|                           | 502300415 | ,000             | ,000  | ,000  |
|                           | 502300416 | 1,000            | ,000  | ,000  |
|                           | 502300811 | ,000             | 1,000 | ,000  |
|                           | 502300913 | ,000             | ,000  | 1,000 |

## Categorical Variables Codings

|                                              |                   | Frequency | Parameter coding |       |
|----------------------------------------------|-------------------|-----------|------------------|-------|
|                                              |                   |           | (1)              | (2)   |
| bv3 belasnting vs paoncil dubbla intervallet | 1 medelbelastning | 9121      | ,000             | ,000  |
|                                              | 2 underbelastning | 1505      | 1,000            | ,000  |
|                                              | 3 överbelastning  | 1849      | ,000             | 1,000 |

## Categorical Variables Codings

|                                              |                   | Parameter coding |     |     |
|----------------------------------------------|-------------------|------------------|-----|-----|
|                                              |                   | (3)              | (4) | (5) |
| bv3 belasnting vs paoncil dubbla intervallet | 1 medelbelastning |                  |     |     |
|                                              | 2 underbelastning |                  |     |     |
|                                              | 3 överbelastning  |                  |     |     |

## Categorical Variables Codings

|                                              |                   | Parameter coding |     |     |
|----------------------------------------------|-------------------|------------------|-----|-----|
|                                              |                   | (6)              | (7) | (8) |
| bv3 belasnting vs paoncil dubbla intervallet | 1 medelbelastning |                  |     |     |
|                                              | 2 underbelastning |                  |     |     |
|                                              | 3 överbelastning  |                  |     |     |

## Categorical Variables Codings

|                                              |                   | Parameter coding |      |      |
|----------------------------------------------|-------------------|------------------|------|------|
|                                              |                   | (9)              | (10) | (11) |
| bv3 belasnting vs paoncil dubbla intervallet | 1 medelbelastning |                  |      |      |
|                                              | 2 underbelastning |                  |      |      |
|                                              | 3 överbelastning  |                  |      |      |

## Categorical Variables Codings

|                                              |                   | Parameter coding |      |      |
|----------------------------------------------|-------------------|------------------|------|------|
|                                              |                   | (12)             | (13) | (14) |
| bv3 belasnting vs paoncil dubbla intervallet | 1 medelbelastning |                  |      |      |
|                                              | 2 underbelastning |                  |      |      |
|                                              | 3 överbelastning  |                  |      |      |

## Categorical Variables Codings

|                                              |                   | Parameter coding |      |      |
|----------------------------------------------|-------------------|------------------|------|------|
|                                              |                   | (15)             | (16) | (17) |
| bv3 belasnting vs paoncil dubbla intervallet | 1 medelbelastning |                  |      |      |
|                                              | 2 underbelastning |                  |      |      |
|                                              | 3 överbelastning  |                  |      |      |

**Categorical Variables Codings**

|                                              |                   | Parameter coding |      |      |
|----------------------------------------------|-------------------|------------------|------|------|
|                                              |                   | (18)             | (19) | (20) |
| bv3 belasnting vs paoncil dubbla intervallet | 1 medelbelastning |                  |      |      |
|                                              | 2 underbelastning |                  |      |      |
|                                              | 3 överbelastning  |                  |      |      |

**Categorical Variables Codings**

|                                              |                   | Parameter coding |      |      |
|----------------------------------------------|-------------------|------------------|------|------|
|                                              |                   | (21)             | (22) | (23) |
| bv3 belasnting vs paoncil dubbla intervallet | 1 medelbelastning |                  |      |      |
|                                              | 2 underbelastning |                  |      |      |
|                                              | 3 överbelastning  |                  |      |      |

**Categorical Variables Codings**

|                                              |                   | Parameter coding |      |      |
|----------------------------------------------|-------------------|------------------|------|------|
|                                              |                   | (24)             | (25) | (26) |
| bv3 belasnting vs paoncil dubbla intervallet | 1 medelbelastning |                  |      |      |
|                                              | 2 underbelastning |                  |      |      |
|                                              | 3 överbelastning  |                  |      |      |

**Categorical Variables Codings**

|                                              |                   | Parameter coding |      |      |
|----------------------------------------------|-------------------|------------------|------|------|
|                                              |                   | (27)             | (28) | (29) |
| bv3 belasnting vs paoncil dubbla intervallet | 1 medelbelastning |                  |      |      |
|                                              | 2 underbelastning |                  |      |      |
|                                              | 3 överbelastning  |                  |      |      |

**Categorical Variables Codings**

|                                              |                   | Parameter coding |      |      |
|----------------------------------------------|-------------------|------------------|------|------|
|                                              |                   | (30)             | (31) | (32) |
| bv3 belasnting vs paoncil dubbla intervallet | 1 medelbelastning |                  |      |      |
|                                              | 2 underbelastning |                  |      |      |
|                                              | 3 överbelastning  |                  |      |      |

**Categorical Variables Codings**

|                                              |                   | Parameter coding |      |      |
|----------------------------------------------|-------------------|------------------|------|------|
|                                              |                   | (33)             | (34) | (35) |
| bv3 belasnting vs paoncil dubbla intervallet | 1 medelbelastning |                  |      |      |
|                                              | 2 underbelastning |                  |      |      |
|                                              | 3 överbelastning  |                  |      |      |

**Block 0: Beginning Block**

Classification Table<sup>a,b</sup>

| Observed           |                                                   |                                                              |
|--------------------|---------------------------------------------------|--------------------------------------------------------------|
| Step 0             | seuraust3 seuraus highest = haitta (i någon form) | 0 ingen händelse eller ei haittaa<br>1 haitta (i någon form) |
| Overall Percentage |                                                   |                                                              |

Classification Table<sup>a,b</sup>

| Observed           |                                                   |                                                              | Predicted                         |
|--------------------|---------------------------------------------------|--------------------------------------------------------------|-----------------------------------|
|                    |                                                   |                                                              | seuraust3 seuraus highest         |
|                    |                                                   |                                                              | 0 ingen händelse eller ei haittaa |
| Step 0             | seuraust3 seuraus highest = haitta (i någon form) | 0 ingen händelse eller ei haittaa<br>1 haitta (i någon form) | 12075<br>400                      |
| Overall Percentage |                                                   |                                                              |                                   |

Classification Table<sup>a,b</sup>

| Observed           |                                                   |                                                              | Predicted                    |
|--------------------|---------------------------------------------------|--------------------------------------------------------------|------------------------------|
|                    |                                                   |                                                              | seuraust3 seuraus highest .. |
|                    |                                                   |                                                              | 1 haitta (i någon form)      |
| Step 0             | seuraust3 seuraus highest = haitta (i någon form) | 0 ingen händelse eller ei haittaa<br>1 haitta (i någon form) | 0<br>0                       |
| Overall Percentage |                                                   |                                                              |                              |

Classification Table<sup>a,b</sup>

| Observed           |                                                   |                                                              | Predicted          |
|--------------------|---------------------------------------------------|--------------------------------------------------------------|--------------------|
|                    |                                                   |                                                              | Percentage Correct |
| Step 0             | seuraust3 seuraus highest = haitta (i någon form) | 0 ingen händelse eller ei haittaa<br>1 haitta (i någon form) | 100,0<br>,0        |
| Overall Percentage |                                                   |                                                              | 96,8               |

a. Constant is included in the model.

b. The cut value is ,500

**Variables in the Equation**

|                 | B      | S.E. | Wald     | df | Sig. | Exp(B) |
|-----------------|--------|------|----------|----|------|--------|
| Step 0 Constant | -3,407 | ,051 | 4495,313 | 1  | ,000 | ,033   |

**Variables not in the Equation**

|                  | Score   | df | Sig. |
|------------------|---------|----|------|
| Step 0 Variables |         |    |      |
| bv3              | 6,457   | 2  | ,040 |
| bv3(1)           | 5,667   | 1  | ,017 |
| bv3(2)           | 1,553   | 1  | ,213 |
| VASTY2           | 321,056 | 35 | ,000 |
| VASTY2(1)        | 1,769   | 1  | ,184 |
| VASTY2(2)        | 27,206  | 1  | ,000 |
| VASTY2(3)        | 8,562   | 1  | ,003 |
| VASTY2(4)        | ,988    | 1  | ,320 |
| VASTY2(5)        | ,587    | 1  | ,444 |
| VASTY2(6)        | 8,528   | 1  | ,003 |
| VASTY2(7)        | 2,666   | 1  | ,103 |
| VASTY2(8)        | ,008    | 1  | ,929 |
| VASTY2(9)        | 19,221  | 1  | ,000 |
| VASTY2(10)       | 58,192  | 1  | ,000 |
| VASTY2(11)       | 21,278  | 1  | ,000 |
| VASTY2(12)       | 2,551   | 1  | ,110 |
| VASTY2(13)       | 62,883  | 1  | ,000 |
| VASTY2(14)       | ,045    | 1  | ,832 |
| VASTY2(15)       | 8,562   | 1  | ,003 |
| VASTY2(16)       | 1,322   | 1  | ,250 |
| VASTY2(17)       | 2,012   | 1  | ,156 |
| VASTY2(18)       | 6,791   | 1  | ,009 |
| VASTY2(19)       | 10,418  | 1  | ,001 |
| VASTY2(20)       | ,662    | 1  | ,416 |
| VASTY2(21)       | 8,562   | 1  | ,003 |
| VASTY2(22)       | 5,396   | 1  | ,020 |
| VASTY2(23)       | ,045    | 1  | ,832 |
| VASTY2(24)       | 5,427   | 1  | ,020 |
| VASTY2(25)       | 6,092   | 1  | ,014 |
| VASTY2(26)       | 7,868   | 1  | ,005 |
| VASTY2(27)       | 5,427   | 1  | ,020 |
| VASTY2(28)       | ,715    | 1  | ,398 |
| VASTY2(29)       | 2,983   | 1  | ,084 |
| VASTY2(30)       | 2,034   | 1  | ,154 |
| VASTY2(31)       | 30,255  | 1  | ,000 |
| VASTY2(32)       | 1,902   | 1  | ,168 |
| VASTY2(33)       | 1,968   | 1  | ,161 |
| VASTY2(34)       | 6,856   | 1  | ,009 |
| VASTY2(35)       | ,127    | 1  | ,722 |

## Variables not in the Equation

|                    | Score   | df | Sig. |
|--------------------|---------|----|------|
| Overall Statistics | 322,675 | 37 | ,000 |

## Block 1: Method = Enter

## Omnibus Tests of Model Coefficients

|             | Chi-square | df | Sig. |
|-------------|------------|----|------|
| Step 1 Step | 297,547    | 37 | ,000 |
| Block       | 297,547    | 37 | ,000 |
| Model       | 297,547    | 37 | ,000 |

## Model Summary

| Step | -2 Log likelihood     | Cox & Snell R Square | Nagelkerke R Square |
|------|-----------------------|----------------------|---------------------|
| 1    | 3241,502 <sup>a</sup> | ,024                 | ,095                |

a. Estimation terminated at iteration number 9 because parameter estimates changed by less than ,001.

Classification Table<sup>a</sup>

| Observed           |                                                    |                                                              |
|--------------------|----------------------------------------------------|--------------------------------------------------------------|
| Step 1             | seorauslt3 seoraus highest = haitta (i någon form) | 0 ingen händelse eller ei haittaa<br>1 haitta (i någon form) |
| Overall Percentage |                                                    |                                                              |

Classification Table<sup>a</sup>

|                    |                                                    |                                                              | Predicted                         |
|--------------------|----------------------------------------------------|--------------------------------------------------------------|-----------------------------------|
|                    |                                                    |                                                              | seorauslt3 seoraus highest        |
|                    |                                                    |                                                              | 0 ingen händelse eller ei haittaa |
| Step 1             | seorauslt3 seoraus highest = haitta (i någon form) | 0 ingen händelse eller ei haittaa<br>1 haitta (i någon form) | 12075<br>400                      |
| Overall Percentage |                                                    |                                                              |                                   |



Classification Table<sup>a</sup>

| Observed           |                                                    | Predicted                         |                         |
|--------------------|----------------------------------------------------|-----------------------------------|-------------------------|
|                    |                                                    | seurauslt3 seuraus highest ..     | 1 haitta (i någon form) |
| Step 1             | seurauslt3 seuraus highest = haitta (i någon form) | 0 ingen händelse eller ei haittaa | 0                       |
|                    |                                                    | 1 haitta (i någon form)           | 0                       |
| Overall Percentage |                                                    |                                   |                         |

Classification Table<sup>a</sup>

| Observed           |                                                    | Predicted                         |       |
|--------------------|----------------------------------------------------|-----------------------------------|-------|
|                    |                                                    | Percentage Correct                |       |
| Step 1             | seurauslt3 seuraus highest = haitta (i någon form) | 0 ingen händelse eller ei haittaa | 100,0 |
|                    |                                                    | 1 haitta (i någon form)           | ,0    |
| Overall Percentage |                                                    |                                   | 96,8  |

a. The cut value is ,500

Variables in the Equation

|                         | B      | S.E. | Wald    | df | Sig. | Exp(B) |
|-------------------------|--------|------|---------|----|------|--------|
| Step 1 <sup>a</sup> bv3 |        |      | 1,703   | 2  | ,427 |        |
| bv3(1)                  | -,161  | ,197 | ,671    | 1  | ,413 | ,851   |
| bv3(2)                  | ,132   | ,148 | ,788    | 1  | ,375 | 1,141  |
| VASTY2                  |        |      | 230,109 | 35 | ,000 |        |
| VASTY2(1)               | ,614   | ,424 | 2,101   | 1  | ,147 | 1,848  |
| VASTY2(2)               | 1,220  | ,389 | 9,836   | 1  | ,002 | 3,389  |
| VASTY2(3)               | -1,582 | ,787 | 4,039   | 1  | ,044 | ,206   |
| VASTY2(4)               | ,480   | ,431 | 1,242   | 1  | ,265 | 1,616  |
| VASTY2(5)               | ,469   | ,441 | 1,130   | 1  | ,288 | 1,598  |
| VASTY2(6)               | -1,559 | ,787 | 3,927   | 1  | ,048 | ,210   |
| VASTY2(7)               | ,587   | ,427 | 1,887   | 1  | ,170 | 1,799  |
| VASTY2(8)               | ,277   | ,448 | ,382    | 1  | ,537 | 1,319  |
| VASTY2(9)               | 1,117  | ,397 | 7,918   | 1  | ,005 | 3,057  |
| VASTY2(10)              | 1,480  | ,380 | 15,190  | 1  | ,000 | 4,392  |
| VASTY2(11)              | 1,145  | ,393 | 8,500   | 1  | ,004 | 3,142  |
| VASTY2(12)              | ,645   | ,419 | 2,366   | 1  | ,124 | 1,906  |
| VASTY2(13)              | 1,489  | ,380 | 15,375  | 1  | ,000 | 4,433  |
| VASTY2(14)              | ,185   | ,456 | ,165    | 1  | ,684 | 1,204  |
| VASTY2(15)              | -1,536 | ,785 | 3,824   | 1  | ,051 | ,215   |
| VASTY2(16)              | -,402  | ,675 | ,354    | 1  | ,552 | ,669   |

## Variables in the Equation

|                     |            | 95% C.I. for EXP(B) |       |
|---------------------|------------|---------------------|-------|
|                     |            | Lower               | Upper |
| Step 1 <sup>a</sup> | bv3        |                     |       |
|                     | bv3(1)     | ,578                | 1,252 |
|                     | bv3(2)     | ,853                | 1,525 |
|                     | VASTY2     |                     |       |
|                     | VASTY2(1)  | ,805                | 4,241 |
|                     | VASTY2(2)  | 1,580               | 7,265 |
|                     | VASTY2(3)  | ,044                | ,962  |
|                     | VASTY2(4)  | ,695                | 3,759 |
|                     | VASTY2(5)  | ,673                | 3,791 |
|                     | VASTY2(6)  | ,045                | ,983  |
|                     | VASTY2(7)  | ,778                | 4,156 |
|                     | VASTY2(8)  | ,548                | 3,171 |
|                     | VASTY2(9)  | 1,404               | 6,656 |
|                     | VASTY2(10) | 2,087               | 9,243 |
|                     | VASTY2(11) | 1,455               | 6,784 |
|                     | VASTY2(12) | ,838                | 4,334 |
|                     | VASTY2(13) | 2,106               | 9,331 |
|                     | VASTY2(14) | ,492                | 2,944 |
|                     | VASTY2(15) | ,046                | 1,004 |
|                     | VASTY2(16) | ,178                | 2,511 |

review only

## Variables in the Equation

|            | B      | S.E.  | Wald    | df | Sig. | Exp(B) |
|------------|--------|-------|---------|----|------|--------|
| VASTY2(17) | -,254  | ,510  | ,248    | 1  | ,618 | ,776   |
| VASTY2(18) | -1,113 | ,671  | 2,747   | 1  | ,097 | ,329   |
| VASTY2(19) | -2,121 | 1,063 | 3,981   | 1  | ,046 | ,120   |
| VASTY2(20) | ,475   | ,450  | 1,114   | 1  | ,291 | 1,608  |
| VASTY2(21) | -1,535 | ,785  | 3,819   | 1  | ,051 | ,215   |
| VASTY2(22) | -,805  | ,606  | 1,767   | 1  | ,184 | ,447   |
| VASTY2(23) | ,216   | ,456  | ,225    | 1  | ,636 | 1,241  |
| VASTY2(24) | -,874  | ,607  | 2,074   | 1  | ,150 | ,417   |
| VASTY2(25) | -1,284 | ,786  | 2,668   | 1  | ,102 | ,277   |
| VASTY2(26) | -2,007 | 1,057 | 3,605   | 1  | ,058 | ,134   |
| VASTY2(27) | -,851  | ,606  | 1,968   | 1  | ,161 | ,427   |
| VASTY2(28) | -,131  | ,565  | ,054    | 1  | ,816 | ,877   |
| VASTY2(29) | -,436  | ,533  | ,669    | 1  | ,413 | ,647   |
| VASTY2(30) | -,282  | ,510  | ,305    | 1  | ,580 | ,754   |
| VASTY2(31) | 1,263  | ,391  | 10,431  | 1  | ,001 | 3,536  |
| VASTY2(32) | -,217  | ,513  | ,180    | 1  | ,672 | ,805   |
| VASTY2(33) | -,229  | ,511  | ,201    | 1  | ,654 | ,795   |
| VASTY2(34) | -1,121 | ,671  | 2,791   | 1  | ,095 | ,326   |
| VASTY2(35) | ,100   | ,482  | ,043    | 1  | ,835 | 1,106  |
| Constant   | -3,667 | ,338  | 117,811 | 1  | ,000 | ,026   |

## Variables in the Equation

|            | 95% C.I. for EXP(B) |       |
|------------|---------------------|-------|
|            | Lower               | Upper |
| VASTY2(17) | ,286                | 2,107 |
| VASTY2(18) | ,088                | 1,225 |
| VASTY2(19) | ,015                | ,963  |
| VASTY2(20) | ,666                | 3,885 |
| VASTY2(21) | ,046                | 1,004 |
| VASTY2(22) | ,136                | 1,465 |
| VASTY2(23) | ,508                | 3,033 |
| VASTY2(24) | ,127                | 1,371 |
| VASTY2(25) | ,059                | 1,292 |
| VASTY2(26) | ,017                | 1,067 |
| VASTY2(27) | ,130                | 1,402 |
| VASTY2(28) | ,290                | 2,653 |
| VASTY2(29) | ,228                | 1,837 |
| VASTY2(30) | ,278                | 2,049 |
| VASTY2(31) | 1,643               | 7,611 |
| VASTY2(32) | ,295                | 2,198 |
| VASTY2(33) | ,292                | 2,167 |
| VASTY2(34) | ,088                | 1,214 |
| VASTY2(35) | ,430                | 2,842 |
| Constant   |                     |       |

a. Variable(s) entered on step 1: bv3, VASTY2.

```
LOGISTIC REGRESSION VARIABLES seurauslt3
/METHOD=ENTER sv3 VASTY2
/CONTRAST (sv3)=Indicator(1)
/CONTRAST (VASTY2)=Indicator(1)
/PRINT=CI(95)
/CRITERIA=PIN(0.05) POUT(0.10) ITERATE(20) CUT(0.5).
```

## Logistic Regression

[DataSet6] C:\cWordjan\Rafaela\_VCS\alla\_tillsammans\abo\_bjo\_vasa\_v1.sav

### Case Processing Summary

| Unweighted Cases <sup>a</sup> |                      | N     | Percent |
|-------------------------------|----------------------|-------|---------|
| Selected Cases                | Included in Analysis | 12475 | 100,0   |
|                               | Missing Cases        | 0     | ,0      |
|                               | Total                | 12475 | 100,0   |
| Unselected Cases              |                      | 0     | ,0      |
| Total                         |                      | 12475 | 100,0   |

a. If weight is in effect, see classification table for the total number of cases.

## Dependent Variable Encoding

| Original Value                    | Internal Value |
|-----------------------------------|----------------|
| 0 ingen händelse eller ei haittaa | 0              |
| 1 haitta (i någon form)           | 1              |

## Categorical Variables Codings

|                                     | Frequency | Parameter coding |       |       |
|-------------------------------------|-----------|------------------|-------|-------|
|                                     |           | (1)              | (2)   | (3)   |
| VASTY2 (SAIR*10000)+VASTY 403073101 | 365       | ,000             | ,000  | ,000  |
| 403073102                           | 362       | 1,000            | ,000  | ,000  |
| 403073103                           | 365       | ,000             | 1,000 | ,000  |
| 403073202                           | 365       | ,000             | ,000  | 1,000 |
| 403073203                           | 365       | ,000             | ,000  | ,000  |
| 403073204                           | 330       | ,000             | ,000  | ,000  |
| 403073303                           | 364       | ,000             | ,000  | ,000  |
| 403073651                           | 362       | ,000             | ,000  | ,000  |
| 403073771                           | 365       | ,000             | ,000  | ,000  |
| 403133102                           | 341       | ,000             | ,000  | ,000  |
| 403133106                           | 365       | ,000             | ,000  | ,000  |
| 403133107                           | 365       | ,000             | ,000  | ,000  |
| 403133109                           | 365       | ,000             | ,000  | ,000  |
| 403133202                           | 365       | ,000             | ,000  | ,000  |
| 403133203                           | 365       | ,000             | ,000  | ,000  |
| 403133204                           | 365       | ,000             | ,000  | ,000  |
| 403133315                           | 177       | ,000             | ,000  | ,000  |
| 403133322                           | 365       | ,000             | ,000  | ,000  |
| 403133401                           | 362       | ,000             | ,000  | ,000  |
| 403133402                           | 365       | ,000             | ,000  | ,000  |
| 403133550                           | 298       | ,000             | ,000  | ,000  |
| 403133772                           | 365       | ,000             | ,000  | ,000  |
| 403135803                           | 365       | ,000             | ,000  | ,000  |
| 404060001                           | 365       | ,000             | ,000  | ,000  |
| 404060002                           | 366       | ,000             | ,000  | ,000  |
| 404310003                           | 291       | ,000             | ,000  | ,000  |
| 404310004                           | 291       | ,000             | ,000  | ,000  |
| 502300005                           | 366       | ,000             | ,000  | ,000  |
| 502300006                           | 225       | ,000             | ,000  | ,000  |
| 502300007                           | 366       | ,000             | ,000  | ,000  |
| 502300214                           | 366       | ,000             | ,000  | ,000  |
| 502300411                           | 366       | ,000             | ,000  | ,000  |
| 502300415                           | 360       | ,000             | ,000  | ,000  |
| 502300416                           | 363       | ,000             | ,000  | ,000  |
| 502300811                           | 364       | ,000             | ,000  | ,000  |
| 502300913                           | 315       | ,000             | ,000  | ,000  |

## Categorical Variables Codings

|                           |           | Parameter coding |       |       |       |
|---------------------------|-----------|------------------|-------|-------|-------|
|                           |           | (4)              | (5)   | (6)   | (7)   |
| VASTY2 (SAIR*10000)+VASTY | 403073101 | ,000             | ,000  | ,000  | ,000  |
|                           | 403073102 | ,000             | ,000  | ,000  | ,000  |
|                           | 403073103 | ,000             | ,000  | ,000  | ,000  |
|                           | 403073202 | ,000             | ,000  | ,000  | ,000  |
|                           | 403073203 | 1,000            | ,000  | ,000  | ,000  |
|                           | 403073204 | ,000             | 1,000 | ,000  | ,000  |
|                           | 403073303 | ,000             | ,000  | 1,000 | ,000  |
|                           | 403073651 | ,000             | ,000  | ,000  | 1,000 |
|                           | 403073771 | ,000             | ,000  | ,000  | ,000  |
|                           | 403133102 | ,000             | ,000  | ,000  | ,000  |
|                           | 403133106 | ,000             | ,000  | ,000  | ,000  |
|                           | 403133107 | ,000             | ,000  | ,000  | ,000  |
|                           | 403133109 | ,000             | ,000  | ,000  | ,000  |
|                           | 403133202 | ,000             | ,000  | ,000  | ,000  |
|                           | 403133203 | ,000             | ,000  | ,000  | ,000  |
|                           | 403133204 | ,000             | ,000  | ,000  | ,000  |
|                           | 403133315 | ,000             | ,000  | ,000  | ,000  |
|                           | 403133322 | ,000             | ,000  | ,000  | ,000  |
|                           | 403133401 | ,000             | ,000  | ,000  | ,000  |
|                           | 403133402 | ,000             | ,000  | ,000  | ,000  |
|                           | 403133550 | ,000             | ,000  | ,000  | ,000  |
|                           | 403133772 | ,000             | ,000  | ,000  | ,000  |
|                           | 403135803 | ,000             | ,000  | ,000  | ,000  |
|                           | 404060001 | ,000             | ,000  | ,000  | ,000  |
|                           | 404060002 | ,000             | ,000  | ,000  | ,000  |
|                           | 404310003 | ,000             | ,000  | ,000  | ,000  |
|                           | 404310004 | ,000             | ,000  | ,000  | ,000  |
|                           | 502300005 | ,000             | ,000  | ,000  | ,000  |
|                           | 502300006 | ,000             | ,000  | ,000  | ,000  |
|                           | 502300007 | ,000             | ,000  | ,000  | ,000  |
|                           | 502300214 | ,000             | ,000  | ,000  | ,000  |
|                           | 502300411 | ,000             | ,000  | ,000  | ,000  |
|                           | 502300415 | ,000             | ,000  | ,000  | ,000  |
|                           | 502300416 | ,000             | ,000  | ,000  | ,000  |
|                           | 502300811 | ,000             | ,000  | ,000  | ,000  |
|                           | 502300913 | ,000             | ,000  | ,000  | ,000  |

**Categorical Variables Codings**

|                           |           | Parameter coding |       |       |       |
|---------------------------|-----------|------------------|-------|-------|-------|
|                           |           | (8)              | (9)   | (10)  | (11)  |
| VASTY2 (SAIR*10000)+VASTY | 403073101 | ,000             | ,000  | ,000  | ,000  |
|                           | 403073102 | ,000             | ,000  | ,000  | ,000  |
|                           | 403073103 | ,000             | ,000  | ,000  | ,000  |
|                           | 403073202 | ,000             | ,000  | ,000  | ,000  |
|                           | 403073203 | ,000             | ,000  | ,000  | ,000  |
|                           | 403073204 | ,000             | ,000  | ,000  | ,000  |
|                           | 403073303 | ,000             | ,000  | ,000  | ,000  |
|                           | 403073651 | ,000             | ,000  | ,000  | ,000  |
|                           | 403073771 | 1,000            | ,000  | ,000  | ,000  |
|                           | 403133102 | ,000             | 1,000 | ,000  | ,000  |
|                           | 403133106 | ,000             | ,000  | 1,000 | ,000  |
|                           | 403133107 | ,000             | ,000  | ,000  | 1,000 |
|                           | 403133109 | ,000             | ,000  | ,000  | ,000  |
|                           | 403133202 | ,000             | ,000  | ,000  | ,000  |
|                           | 403133203 | ,000             | ,000  | ,000  | ,000  |
|                           | 403133204 | ,000             | ,000  | ,000  | ,000  |
|                           | 403133315 | ,000             | ,000  | ,000  | ,000  |
|                           | 403133322 | ,000             | ,000  | ,000  | ,000  |
|                           | 403133401 | ,000             | ,000  | ,000  | ,000  |
|                           | 403133402 | ,000             | ,000  | ,000  | ,000  |
|                           | 403133550 | ,000             | ,000  | ,000  | ,000  |
|                           | 403133772 | ,000             | ,000  | ,000  | ,000  |
|                           | 403135803 | ,000             | ,000  | ,000  | ,000  |
|                           | 404060001 | ,000             | ,000  | ,000  | ,000  |
|                           | 404060002 | ,000             | ,000  | ,000  | ,000  |
|                           | 404310003 | ,000             | ,000  | ,000  | ,000  |
|                           | 404310004 | ,000             | ,000  | ,000  | ,000  |
|                           | 502300005 | ,000             | ,000  | ,000  | ,000  |
|                           | 502300006 | ,000             | ,000  | ,000  | ,000  |
|                           | 502300007 | ,000             | ,000  | ,000  | ,000  |
|                           | 502300214 | ,000             | ,000  | ,000  | ,000  |
|                           | 502300411 | ,000             | ,000  | ,000  | ,000  |
|                           | 502300415 | ,000             | ,000  | ,000  | ,000  |
|                           | 502300416 | ,000             | ,000  | ,000  | ,000  |
|                           | 502300811 | ,000             | ,000  | ,000  | ,000  |
|                           | 502300913 | ,000             | ,000  | ,000  | ,000  |

## Categorical Variables Codings

|                           |           | Parameter coding |       |       |       |
|---------------------------|-----------|------------------|-------|-------|-------|
|                           |           | (12)             | (13)  | (14)  | (15)  |
| VASTY2 (SAIR*10000)+VASTY | 403073101 | ,000             | ,000  | ,000  | ,000  |
|                           | 403073102 | ,000             | ,000  | ,000  | ,000  |
|                           | 403073103 | ,000             | ,000  | ,000  | ,000  |
|                           | 403073202 | ,000             | ,000  | ,000  | ,000  |
|                           | 403073203 | ,000             | ,000  | ,000  | ,000  |
|                           | 403073204 | ,000             | ,000  | ,000  | ,000  |
|                           | 403073303 | ,000             | ,000  | ,000  | ,000  |
|                           | 403073651 | ,000             | ,000  | ,000  | ,000  |
|                           | 403073771 | ,000             | ,000  | ,000  | ,000  |
|                           | 403133102 | ,000             | ,000  | ,000  | ,000  |
|                           | 403133106 | ,000             | ,000  | ,000  | ,000  |
|                           | 403133107 | ,000             | ,000  | ,000  | ,000  |
|                           | 403133109 | 1,000            | ,000  | ,000  | ,000  |
|                           | 403133202 | ,000             | 1,000 | ,000  | ,000  |
|                           | 403133203 | ,000             | ,000  | 1,000 | ,000  |
|                           | 403133204 | ,000             | ,000  | ,000  | 1,000 |
|                           | 403133315 | ,000             | ,000  | ,000  | ,000  |
|                           | 403133322 | ,000             | ,000  | ,000  | ,000  |
|                           | 403133401 | ,000             | ,000  | ,000  | ,000  |
|                           | 403133402 | ,000             | ,000  | ,000  | ,000  |
|                           | 403133550 | ,000             | ,000  | ,000  | ,000  |
|                           | 403133772 | ,000             | ,000  | ,000  | ,000  |
|                           | 403135803 | ,000             | ,000  | ,000  | ,000  |
|                           | 404060001 | ,000             | ,000  | ,000  | ,000  |
|                           | 404060002 | ,000             | ,000  | ,000  | ,000  |
|                           | 404310003 | ,000             | ,000  | ,000  | ,000  |
|                           | 404310004 | ,000             | ,000  | ,000  | ,000  |
|                           | 502300005 | ,000             | ,000  | ,000  | ,000  |
|                           | 502300006 | ,000             | ,000  | ,000  | ,000  |
|                           | 502300007 | ,000             | ,000  | ,000  | ,000  |
|                           | 502300214 | ,000             | ,000  | ,000  | ,000  |
|                           | 502300411 | ,000             | ,000  | ,000  | ,000  |
|                           | 502300415 | ,000             | ,000  | ,000  | ,000  |
|                           | 502300416 | ,000             | ,000  | ,000  | ,000  |
|                           | 502300811 | ,000             | ,000  | ,000  | ,000  |
|                           | 502300913 | ,000             | ,000  | ,000  | ,000  |



**Categorical Variables Codings**

|                           |           | Parameter coding |       |       |       |
|---------------------------|-----------|------------------|-------|-------|-------|
|                           |           | (16)             | (17)  | (18)  | (19)  |
| VASTY2 (SAIR*10000)+VASTY | 403073101 | ,000             | ,000  | ,000  | ,000  |
|                           | 403073102 | ,000             | ,000  | ,000  | ,000  |
|                           | 403073103 | ,000             | ,000  | ,000  | ,000  |
|                           | 403073202 | ,000             | ,000  | ,000  | ,000  |
|                           | 403073203 | ,000             | ,000  | ,000  | ,000  |
|                           | 403073204 | ,000             | ,000  | ,000  | ,000  |
|                           | 403073303 | ,000             | ,000  | ,000  | ,000  |
|                           | 403073651 | ,000             | ,000  | ,000  | ,000  |
|                           | 403073771 | ,000             | ,000  | ,000  | ,000  |
|                           | 403133102 | ,000             | ,000  | ,000  | ,000  |
|                           | 403133106 | ,000             | ,000  | ,000  | ,000  |
|                           | 403133107 | ,000             | ,000  | ,000  | ,000  |
|                           | 403133109 | ,000             | ,000  | ,000  | ,000  |
|                           | 403133202 | ,000             | ,000  | ,000  | ,000  |
|                           | 403133203 | ,000             | ,000  | ,000  | ,000  |
|                           | 403133204 | ,000             | ,000  | ,000  | ,000  |
|                           | 403133315 | 1,000            | ,000  | ,000  | ,000  |
|                           | 403133322 | ,000             | 1,000 | ,000  | ,000  |
|                           | 403133401 | ,000             | ,000  | 1,000 | ,000  |
|                           | 403133402 | ,000             | ,000  | ,000  | 1,000 |
|                           | 403133550 | ,000             | ,000  | ,000  | ,000  |
|                           | 403133772 | ,000             | ,000  | ,000  | ,000  |
|                           | 403135803 | ,000             | ,000  | ,000  | ,000  |
|                           | 404060001 | ,000             | ,000  | ,000  | ,000  |
|                           | 404060002 | ,000             | ,000  | ,000  | ,000  |
|                           | 404310003 | ,000             | ,000  | ,000  | ,000  |
|                           | 404310004 | ,000             | ,000  | ,000  | ,000  |
|                           | 502300005 | ,000             | ,000  | ,000  | ,000  |
|                           | 502300006 | ,000             | ,000  | ,000  | ,000  |
|                           | 502300007 | ,000             | ,000  | ,000  | ,000  |
|                           | 502300214 | ,000             | ,000  | ,000  | ,000  |
|                           | 502300411 | ,000             | ,000  | ,000  | ,000  |
|                           | 502300415 | ,000             | ,000  | ,000  | ,000  |
|                           | 502300416 | ,000             | ,000  | ,000  | ,000  |
|                           | 502300811 | ,000             | ,000  | ,000  | ,000  |
|                           | 502300913 | ,000             | ,000  | ,000  | ,000  |

## Categorical Variables Codings

|                           |           | Parameter coding |       |       |       |
|---------------------------|-----------|------------------|-------|-------|-------|
|                           |           | (20)             | (21)  | (22)  | (23)  |
| VASTY2 (SAIR*10000)+VASTY | 403073101 | ,000             | ,000  | ,000  | ,000  |
|                           | 403073102 | ,000             | ,000  | ,000  | ,000  |
|                           | 403073103 | ,000             | ,000  | ,000  | ,000  |
|                           | 403073202 | ,000             | ,000  | ,000  | ,000  |
|                           | 403073203 | ,000             | ,000  | ,000  | ,000  |
|                           | 403073204 | ,000             | ,000  | ,000  | ,000  |
|                           | 403073303 | ,000             | ,000  | ,000  | ,000  |
|                           | 403073651 | ,000             | ,000  | ,000  | ,000  |
|                           | 403073771 | ,000             | ,000  | ,000  | ,000  |
|                           | 403133102 | ,000             | ,000  | ,000  | ,000  |
|                           | 403133106 | ,000             | ,000  | ,000  | ,000  |
|                           | 403133107 | ,000             | ,000  | ,000  | ,000  |
|                           | 403133109 | ,000             | ,000  | ,000  | ,000  |
|                           | 403133202 | ,000             | ,000  | ,000  | ,000  |
|                           | 403133203 | ,000             | ,000  | ,000  | ,000  |
|                           | 403133204 | ,000             | ,000  | ,000  | ,000  |
|                           | 403133315 | ,000             | ,000  | ,000  | ,000  |
|                           | 403133322 | ,000             | ,000  | ,000  | ,000  |
|                           | 403133401 | ,000             | ,000  | ,000  | ,000  |
|                           | 403133402 | ,000             | ,000  | ,000  | ,000  |
|                           | 403133550 | 1,000            | ,000  | ,000  | ,000  |
|                           | 403133772 | ,000             | 1,000 | ,000  | ,000  |
|                           | 403135803 | ,000             | ,000  | 1,000 | ,000  |
|                           | 404060001 | ,000             | ,000  | ,000  | 1,000 |
|                           | 404060002 | ,000             | ,000  | ,000  | ,000  |
|                           | 404310003 | ,000             | ,000  | ,000  | ,000  |
|                           | 404310004 | ,000             | ,000  | ,000  | ,000  |
|                           | 502300005 | ,000             | ,000  | ,000  | ,000  |
|                           | 502300006 | ,000             | ,000  | ,000  | ,000  |
|                           | 502300007 | ,000             | ,000  | ,000  | ,000  |
|                           | 502300214 | ,000             | ,000  | ,000  | ,000  |
|                           | 502300411 | ,000             | ,000  | ,000  | ,000  |
|                           | 502300415 | ,000             | ,000  | ,000  | ,000  |
|                           | 502300416 | ,000             | ,000  | ,000  | ,000  |
|                           | 502300811 | ,000             | ,000  | ,000  | ,000  |
|                           | 502300913 | ,000             | ,000  | ,000  | ,000  |

**Categorical Variables Codings**

|                           |           | Parameter coding |       |       |       |
|---------------------------|-----------|------------------|-------|-------|-------|
|                           |           | (24)             | (25)  | (26)  | (27)  |
| VASTY2 (SAIR*10000)+VASTY | 403073101 | ,000             | ,000  | ,000  | ,000  |
|                           | 403073102 | ,000             | ,000  | ,000  | ,000  |
|                           | 403073103 | ,000             | ,000  | ,000  | ,000  |
|                           | 403073202 | ,000             | ,000  | ,000  | ,000  |
|                           | 403073203 | ,000             | ,000  | ,000  | ,000  |
|                           | 403073204 | ,000             | ,000  | ,000  | ,000  |
|                           | 403073303 | ,000             | ,000  | ,000  | ,000  |
|                           | 403073651 | ,000             | ,000  | ,000  | ,000  |
|                           | 403073771 | ,000             | ,000  | ,000  | ,000  |
|                           | 403133102 | ,000             | ,000  | ,000  | ,000  |
|                           | 403133106 | ,000             | ,000  | ,000  | ,000  |
|                           | 403133107 | ,000             | ,000  | ,000  | ,000  |
|                           | 403133109 | ,000             | ,000  | ,000  | ,000  |
|                           | 403133202 | ,000             | ,000  | ,000  | ,000  |
|                           | 403133203 | ,000             | ,000  | ,000  | ,000  |
|                           | 403133204 | ,000             | ,000  | ,000  | ,000  |
|                           | 403133315 | ,000             | ,000  | ,000  | ,000  |
|                           | 403133322 | ,000             | ,000  | ,000  | ,000  |
|                           | 403133401 | ,000             | ,000  | ,000  | ,000  |
|                           | 403133402 | ,000             | ,000  | ,000  | ,000  |
|                           | 403133550 | ,000             | ,000  | ,000  | ,000  |
|                           | 403133772 | ,000             | ,000  | ,000  | ,000  |
|                           | 403135803 | ,000             | ,000  | ,000  | ,000  |
|                           | 404060001 | ,000             | ,000  | ,000  | ,000  |
|                           | 404060002 | 1,000            | ,000  | ,000  | ,000  |
|                           | 404310003 | ,000             | 1,000 | ,000  | ,000  |
|                           | 404310004 | ,000             | ,000  | 1,000 | ,000  |
|                           | 502300005 | ,000             | ,000  | ,000  | 1,000 |
|                           | 502300006 | ,000             | ,000  | ,000  | ,000  |
|                           | 502300007 | ,000             | ,000  | ,000  | ,000  |
|                           | 502300214 | ,000             | ,000  | ,000  | ,000  |
|                           | 502300411 | ,000             | ,000  | ,000  | ,000  |
|                           | 502300415 | ,000             | ,000  | ,000  | ,000  |
|                           | 502300416 | ,000             | ,000  | ,000  | ,000  |
|                           | 502300811 | ,000             | ,000  | ,000  | ,000  |
|                           | 502300913 | ,000             | ,000  | ,000  | ,000  |

## Categorical Variables Codings

|                           |           | Parameter coding |       |       |       |
|---------------------------|-----------|------------------|-------|-------|-------|
|                           |           | (28)             | (29)  | (30)  | (31)  |
| VASTY2 (SAIR*10000)+VASTY | 403073101 | ,000             | ,000  | ,000  | ,000  |
|                           | 403073102 | ,000             | ,000  | ,000  | ,000  |
|                           | 403073103 | ,000             | ,000  | ,000  | ,000  |
|                           | 403073202 | ,000             | ,000  | ,000  | ,000  |
|                           | 403073203 | ,000             | ,000  | ,000  | ,000  |
|                           | 403073204 | ,000             | ,000  | ,000  | ,000  |
|                           | 403073303 | ,000             | ,000  | ,000  | ,000  |
|                           | 403073651 | ,000             | ,000  | ,000  | ,000  |
|                           | 403073771 | ,000             | ,000  | ,000  | ,000  |
|                           | 403133102 | ,000             | ,000  | ,000  | ,000  |
|                           | 403133106 | ,000             | ,000  | ,000  | ,000  |
|                           | 403133107 | ,000             | ,000  | ,000  | ,000  |
|                           | 403133109 | ,000             | ,000  | ,000  | ,000  |
|                           | 403133202 | ,000             | ,000  | ,000  | ,000  |
|                           | 403133203 | ,000             | ,000  | ,000  | ,000  |
|                           | 403133204 | ,000             | ,000  | ,000  | ,000  |
|                           | 403133315 | ,000             | ,000  | ,000  | ,000  |
|                           | 403133322 | ,000             | ,000  | ,000  | ,000  |
|                           | 403133401 | ,000             | ,000  | ,000  | ,000  |
|                           | 403133402 | ,000             | ,000  | ,000  | ,000  |
|                           | 403133550 | ,000             | ,000  | ,000  | ,000  |
|                           | 403133772 | ,000             | ,000  | ,000  | ,000  |
|                           | 403135803 | ,000             | ,000  | ,000  | ,000  |
|                           | 404060001 | ,000             | ,000  | ,000  | ,000  |
|                           | 404060002 | ,000             | ,000  | ,000  | ,000  |
|                           | 404310003 | ,000             | ,000  | ,000  | ,000  |
|                           | 404310004 | ,000             | ,000  | ,000  | ,000  |
|                           | 502300005 | ,000             | ,000  | ,000  | ,000  |
|                           | 502300006 | 1,000            | ,000  | ,000  | ,000  |
|                           | 502300007 | ,000             | 1,000 | ,000  | ,000  |
|                           | 502300214 | ,000             | ,000  | 1,000 | ,000  |
|                           | 502300411 | ,000             | ,000  | ,000  | 1,000 |
|                           | 502300415 | ,000             | ,000  | ,000  | ,000  |
|                           | 502300416 | ,000             | ,000  | ,000  | ,000  |
|                           | 502300811 | ,000             | ,000  | ,000  | ,000  |
|                           | 502300913 | ,000             | ,000  | ,000  | ,000  |

**Categorical Variables Codings**

|                           |           | Parameter coding |       |       |       |
|---------------------------|-----------|------------------|-------|-------|-------|
|                           |           | (32)             | (33)  | (34)  | (35)  |
| VASTY2 (SAIR*10000)+VASTY | 403073101 | ,000             | ,000  | ,000  | ,000  |
|                           | 403073102 | ,000             | ,000  | ,000  | ,000  |
|                           | 403073103 | ,000             | ,000  | ,000  | ,000  |
|                           | 403073202 | ,000             | ,000  | ,000  | ,000  |
|                           | 403073203 | ,000             | ,000  | ,000  | ,000  |
|                           | 403073204 | ,000             | ,000  | ,000  | ,000  |
|                           | 403073303 | ,000             | ,000  | ,000  | ,000  |
|                           | 403073651 | ,000             | ,000  | ,000  | ,000  |
|                           | 403073771 | ,000             | ,000  | ,000  | ,000  |
|                           | 403133102 | ,000             | ,000  | ,000  | ,000  |
|                           | 403133106 | ,000             | ,000  | ,000  | ,000  |
|                           | 403133107 | ,000             | ,000  | ,000  | ,000  |
|                           | 403133109 | ,000             | ,000  | ,000  | ,000  |
|                           | 403133202 | ,000             | ,000  | ,000  | ,000  |
|                           | 403133203 | ,000             | ,000  | ,000  | ,000  |
|                           | 403133204 | ,000             | ,000  | ,000  | ,000  |
|                           | 403133315 | ,000             | ,000  | ,000  | ,000  |
|                           | 403133322 | ,000             | ,000  | ,000  | ,000  |
|                           | 403133401 | ,000             | ,000  | ,000  | ,000  |
|                           | 403133402 | ,000             | ,000  | ,000  | ,000  |
|                           | 403133550 | ,000             | ,000  | ,000  | ,000  |
|                           | 403133772 | ,000             | ,000  | ,000  | ,000  |
|                           | 403135803 | ,000             | ,000  | ,000  | ,000  |
|                           | 404060001 | ,000             | ,000  | ,000  | ,000  |
|                           | 404060002 | ,000             | ,000  | ,000  | ,000  |
|                           | 404310003 | ,000             | ,000  | ,000  | ,000  |
|                           | 404310004 | ,000             | ,000  | ,000  | ,000  |
|                           | 502300005 | ,000             | ,000  | ,000  | ,000  |
|                           | 502300006 | ,000             | ,000  | ,000  | ,000  |
|                           | 502300007 | ,000             | ,000  | ,000  | ,000  |
|                           | 502300214 | ,000             | ,000  | ,000  | ,000  |
|                           | 502300411 | ,000             | ,000  | ,000  | ,000  |
|                           | 502300415 | 1,000            | ,000  | ,000  | ,000  |
|                           | 502300416 | ,000             | 1,000 | ,000  | ,000  |
|                           | 502300811 | ,000             | ,000  | 1,000 | ,000  |
|                           | 502300913 | ,000             | ,000  | ,000  | 1,000 |

## Categorical Variables Codings

|                              |                      | Frequency | Parameter coding |       |     |
|------------------------------|----------------------|-----------|------------------|-------|-----|
|                              |                      |           | (1)              | (2)   | (3) |
| sv3 tredjedelar för standard | 1 andra tredjedelen  | 3172      | ,000             | ,000  |     |
|                              | 2 första tredjedelen | 4718      | 1,000            | ,000  |     |
|                              | 3 tredje tredjedelen | 4585      | ,000             | 1,000 |     |

## Categorical Variables Codings

|                              |                      | Parameter coding |     |     |     |
|------------------------------|----------------------|------------------|-----|-----|-----|
|                              |                      | (4)              | (5) | (6) | (7) |
| sv3 tredjedelar för standard | 1 andra tredjedelen  |                  |     |     |     |
|                              | 2 första tredjedelen |                  |     |     |     |
|                              | 3 tredje tredjedelen |                  |     |     |     |

## Categorical Variables Codings

|                              |                      | Parameter coding |     |      |      |
|------------------------------|----------------------|------------------|-----|------|------|
|                              |                      | (8)              | (9) | (10) | (11) |
| sv3 tredjedelar för standard | 1 andra tredjedelen  |                  |     |      |      |
|                              | 2 första tredjedelen |                  |     |      |      |
|                              | 3 tredje tredjedelen |                  |     |      |      |

## Categorical Variables Codings

|                              |                      | Parameter coding |      |      |      |
|------------------------------|----------------------|------------------|------|------|------|
|                              |                      | (12)             | (13) | (14) | (15) |
| sv3 tredjedelar för standard | 1 andra tredjedelen  |                  |      |      |      |
|                              | 2 första tredjedelen |                  |      |      |      |
|                              | 3 tredje tredjedelen |                  |      |      |      |

## Categorical Variables Codings

|                              |                      | Parameter coding |      |      |      |
|------------------------------|----------------------|------------------|------|------|------|
|                              |                      | (16)             | (17) | (18) | (19) |
| sv3 tredjedelar för standard | 1 andra tredjedelen  |                  |      |      |      |
|                              | 2 första tredjedelen |                  |      |      |      |
|                              | 3 tredje tredjedelen |                  |      |      |      |

## Categorical Variables Codings

|                              |                      | Parameter coding |      |      |      |
|------------------------------|----------------------|------------------|------|------|------|
|                              |                      | (20)             | (21) | (22) | (23) |
| sv3 tredjedelar för standard | 1 andra tredjedelen  |                  |      |      |      |
|                              | 2 första tredjedelen |                  |      |      |      |
|                              | 3 tredje tredjedelen |                  |      |      |      |

**Categorical Variables Codings**

|                              |                      | Parameter coding |      |      |      |
|------------------------------|----------------------|------------------|------|------|------|
|                              |                      | (24)             | (25) | (26) | (27) |
| sv3 tredjedelar för standard | 1 andra tredjedelen  |                  |      |      |      |
|                              | 2 första tredjedelen |                  |      |      |      |
|                              | 3 tredje tredjedelen |                  |      |      |      |

**Categorical Variables Codings**

|                              |                      | Parameter coding |      |      |      |
|------------------------------|----------------------|------------------|------|------|------|
|                              |                      | (28)             | (29) | (30) | (31) |
| sv3 tredjedelar för standard | 1 andra tredjedelen  |                  |      |      |      |
|                              | 2 första tredjedelen |                  |      |      |      |
|                              | 3 tredje tredjedelen |                  |      |      |      |

**Categorical Variables Codings**

|                              |                      | Parameter coding |      |      |      |
|------------------------------|----------------------|------------------|------|------|------|
|                              |                      | (32)             | (33) | (34) | (35) |
| sv3 tredjedelar för standard | 1 andra tredjedelen  |                  |      |      |      |
|                              | 2 första tredjedelen |                  |      |      |      |
|                              | 3 tredje tredjedelen |                  |      |      |      |

**Block 0: Beginning Block**

**Classification Table<sup>a,b</sup>**

| Observed           |                                                    |                                                              |
|--------------------|----------------------------------------------------|--------------------------------------------------------------|
| Step 0             | seorauslt3 seoraus highest = haitta (i någon form) | 0 ingen händelse eller ei haittaa<br>1 haitta (i någon form) |
| Overall Percentage |                                                    |                                                              |

**Classification Table<sup>a,b</sup>**

| Observed           |                                                    | Predicted                         |                                   |
|--------------------|----------------------------------------------------|-----------------------------------|-----------------------------------|
|                    |                                                    | seorauslt3 seoraus highest        | 0 ingen händelse eller ei haittaa |
| Step 0             | seorauslt3 seoraus highest = haitta (i någon form) | 0 ingen händelse eller ei haittaa | 12075                             |
| Overall Percentage |                                                    | 1 haitta (i någon form)           | 400                               |

Classification Table<sup>a,b</sup>

| Observed           |                                                   |                                   | Predicted                       |                            |
|--------------------|---------------------------------------------------|-----------------------------------|---------------------------------|----------------------------|
|                    |                                                   |                                   | seuraust3<br>seuraus highest .. | 1 haitta (i<br>någon form) |
| Step 0             | seuraust3 seuraus highest = haitta (i någon form) | 0 ingen händelse eller ei haittaa | 0                               |                            |
|                    |                                                   | 1 haitta (i någon form)           | 0                               |                            |
| Overall Percentage |                                                   |                                   |                                 |                            |

Classification Table<sup>a,b</sup>

| Observed           |                                                   |                                   | Predicted          |  |
|--------------------|---------------------------------------------------|-----------------------------------|--------------------|--|
|                    |                                                   |                                   | Percentage Correct |  |
| Step 0             | seuraust3 seuraus highest = haitta (i någon form) | 0 ingen händelse eller ei haittaa | 100,0              |  |
|                    |                                                   | 1 haitta (i någon form)           | ,0                 |  |
| Overall Percentage |                                                   |                                   | 96,8               |  |

a. Constant is included in the model.

b. The cut value is ,500

Variables in the Equation

|                 | B      | S.E. | Wald     | df | Sig. | Exp(B) |
|-----------------|--------|------|----------|----|------|--------|
| Step 0 Constant | -3,407 | ,051 | 4495,313 | 1  | ,000 | ,033   |



## Variables not in the Equation

|        |                    |            | Score   | df | Sig. |
|--------|--------------------|------------|---------|----|------|
| Step 0 | Variables          | sv3        | 13,876  | 2  | ,001 |
|        |                    | sv3(1)     | 10,745  | 1  | ,001 |
|        |                    | sv3(2)     | 11,368  | 1  | ,001 |
|        |                    | VASTY2     | 321,056 | 35 | ,000 |
|        |                    | VASTY2(1)  | 1,769   | 1  | ,184 |
|        |                    | VASTY2(2)  | 27,206  | 1  | ,000 |
|        |                    | VASTY2(3)  | 8,562   | 1  | ,003 |
|        |                    | VASTY2(4)  | ,988    | 1  | ,320 |
|        |                    | VASTY2(5)  | ,587    | 1  | ,444 |
|        |                    | VASTY2(6)  | 8,528   | 1  | ,003 |
|        |                    | VASTY2(7)  | 2,666   | 1  | ,103 |
|        |                    | VASTY2(8)  | ,008    | 1  | ,929 |
|        |                    | VASTY2(9)  | 19,221  | 1  | ,000 |
|        |                    | VASTY2(10) | 58,192  | 1  | ,000 |
|        |                    | VASTY2(11) | 21,278  | 1  | ,000 |
|        |                    | VASTY2(12) | 2,551   | 1  | ,110 |
|        |                    | VASTY2(13) | 62,883  | 1  | ,000 |
|        |                    | VASTY2(14) | ,045    | 1  | ,832 |
|        |                    | VASTY2(15) | 8,562   | 1  | ,003 |
|        |                    | VASTY2(16) | 1,322   | 1  | ,250 |
|        |                    | VASTY2(17) | 2,012   | 1  | ,156 |
|        |                    | VASTY2(18) | 6,791   | 1  | ,009 |
|        |                    | VASTY2(19) | 10,418  | 1  | ,001 |
|        |                    | VASTY2(20) | ,662    | 1  | ,416 |
|        |                    | VASTY2(21) | 8,562   | 1  | ,003 |
|        |                    | VASTY2(22) | 5,396   | 1  | ,020 |
|        |                    | VASTY2(23) | ,045    | 1  | ,832 |
|        |                    | VASTY2(24) | 5,427   | 1  | ,020 |
|        |                    | VASTY2(25) | 6,092   | 1  | ,014 |
|        |                    | VASTY2(26) | 7,868   | 1  | ,005 |
|        |                    | VASTY2(27) | 5,427   | 1  | ,020 |
|        |                    | VASTY2(28) | ,715    | 1  | ,398 |
|        |                    | VASTY2(29) | 2,983   | 1  | ,084 |
|        |                    | VASTY2(30) | 2,034   | 1  | ,154 |
|        |                    | VASTY2(31) | 30,255  | 1  | ,000 |
|        |                    | VASTY2(32) | 1,902   | 1  | ,168 |
|        |                    | VASTY2(33) | 1,968   | 1  | ,161 |
|        |                    | VASTY2(34) | 6,856   | 1  | ,009 |
|        |                    | VASTY2(35) | ,127    | 1  | ,722 |
|        | Overall Statistics |            | 321,992 | 37 | ,000 |

**Block 1: Method = Enter**

## Omnibus Tests of Model Coefficients

|        |       | Chi-square | df | Sig. |
|--------|-------|------------|----|------|
| Step 1 | Step  | 296,871    | 37 | ,000 |
|        | Block | 296,871    | 37 | ,000 |
|        | Model | 296,871    | 37 | ,000 |

## Model Summary

| Step | -2 Log likelihood     | Cox & Snell R Square | Nagelkerke R Square |
|------|-----------------------|----------------------|---------------------|
| 1    | 3242,178 <sup>a</sup> | ,024                 | ,095                |

a. Estimation terminated at iteration number 9 because parameter estimates changed by less than ,001.

Classification Table<sup>a</sup>

| Observed           |                                                    |                                                              |
|--------------------|----------------------------------------------------|--------------------------------------------------------------|
| Step 1             | seorauslt3 seoraus highest = haitta (i någon form) | 0 ingen händelse eller ei haittaa<br>1 haitta (i någon form) |
| Overall Percentage |                                                    |                                                              |

Classification Table<sup>a</sup>

| Observed           |                                                    | Predicted                                                                       |
|--------------------|----------------------------------------------------|---------------------------------------------------------------------------------|
| Step 1             | seorauslt3 seoraus highest = haitta (i någon form) | seorauslt3 seoraus highest<br>0 ingen händelse eller ei haittaa<br>12075<br>400 |
| Overall Percentage |                                                    |                                                                                 |

Classification Table<sup>a</sup>

| Observed           |                                                    | Predicted                                                           |
|--------------------|----------------------------------------------------|---------------------------------------------------------------------|
| Step 1             | seorauslt3 seoraus highest = haitta (i någon form) | seorauslt3 seoraus highest ...<br>1 haitta (i någon form)<br>0<br>0 |
| Overall Percentage |                                                    |                                                                     |

Classification Table<sup>a</sup>

|                    |                                                   |                                   | Predicted          |
|--------------------|---------------------------------------------------|-----------------------------------|--------------------|
| Observed           |                                                   |                                   | Percentage Correct |
| Step 1             | seuraust3 seuraus highest = haitta (i någon form) | 0 ingen händelse eller ei haittaa | 100,0              |
|                    |                                                   | 1 haitta (i någon form)           | ,0                 |
| Overall Percentage |                                                   |                                   | 96,8               |

a. The cut value is ,500

Variables in the Equation

|                     |            | B      | S.E.  | Wald    | df | Sig. | Exp(B) |
|---------------------|------------|--------|-------|---------|----|------|--------|
| Step 1 <sup>a</sup> | sv3        |        |       | 1,026   | 2  | ,599 |        |
|                     | sv3(1)     | -,128  | ,156  | ,675    | 1  | ,411 | ,880   |
|                     | sv3(2)     | ,033   | ,148  | ,051    | 1  | ,822 | 1,034  |
|                     | VASTY2     |        |       | 218,913 | 35 | ,000 |        |
|                     | VASTY2(1)  | ,591   | ,425  | 1,936   | 1  | ,164 | 1,806  |
|                     | VASTY2(2)  | 1,185  | ,395  | 9,009   | 1  | ,003 | 3,270  |
|                     | VASTY2(3)  | -1,505 | ,786  | 3,673   | 1  | ,055 | ,222   |
|                     | VASTY2(4)  | ,548   | ,429  | 1,635   | 1  | ,201 | 1,731  |
|                     | VASTY2(5)  | ,535   | ,443  | 1,457   | 1  | ,227 | 1,708  |
|                     | VASTY2(6)  | -1,571 | ,790  | 3,952   | 1  | ,047 | ,208   |
|                     | VASTY2(7)  | ,685   | ,420  | 2,670   | 1  | ,102 | 1,985  |
|                     | VASTY2(8)  | ,327   | ,448  | ,530    | 1  | ,467 | 1,386  |
|                     | VASTY2(9)  | 1,142  | ,396  | 8,306   | 1  | ,004 | 3,134  |
|                     | VASTY2(10) | 1,445  | ,388  | 13,885  | 1  | ,000 | 4,242  |
|                     | VASTY2(11) | 1,158  | ,392  | 8,699   | 1  | ,003 | 3,182  |
|                     | VASTY2(12) | ,615   | ,424  | 2,109   | 1  | ,146 | 1,851  |
|                     | VASTY2(13) | 1,472  | ,388  | 14,394  | 1  | ,000 | 4,358  |
|                     | VASTY2(14) | ,177   | ,458  | ,149    | 1  | ,699 | 1,194  |
|                     | VASTY2(15) | -1,566 | ,788  | 3,946   | 1  | ,047 | ,209   |
|                     | VASTY2(16) | -,376  | ,674  | ,311    | 1  | ,577 | ,687   |
|                     | VASTY2(17) | -,225  | ,511  | ,194    | 1  | ,660 | ,799   |
|                     | VASTY2(18) | -1,006 | ,679  | 2,193   | 1  | ,139 | ,366   |
|                     | VASTY2(19) | -2,117 | 1,062 | 3,975   | 1  | ,046 | ,120   |
|                     | VASTY2(20) | ,482   | ,451  | 1,145   | 1  | ,285 | 1,619  |
|                     | VASTY2(21) | -1,498 | ,786  | 3,636   | 1  | ,057 | ,224   |
|                     | VASTY2(22) | -,824  | ,606  | 1,851   | 1  | ,174 | ,439   |
|                     | VASTY2(23) | ,223   | ,456  | ,238    | 1  | ,625 | 1,249  |
|                     | VASTY2(24) | -,846  | ,606  | 1,946   | 1  | ,163 | ,429   |
|                     | VASTY2(25) | -1,260 | ,787  | 2,566   | 1  | ,109 | ,284   |
|                     | VASTY2(26) | -1,993 | 1,057 | 3,555   | 1  | ,059 | ,136   |

## Variables in the Equation

|                     |            | 95% C.I. for EXP(B) |       |
|---------------------|------------|---------------------|-------|
|                     |            | Lower               | Upper |
| Step 1 <sup>a</sup> | sv3        |                     |       |
|                     | sv3(1)     | ,649                | 1,194 |
|                     | sv3(2)     | ,774                | 1,380 |
|                     | VASTY2     |                     |       |
|                     | VASTY2(1)  | ,785                | 4,154 |
|                     | VASTY2(2)  | 1,508               | 7,088 |
|                     | VASTY2(3)  | ,048                | 1,035 |
|                     | VASTY2(4)  | ,747                | 4,011 |
|                     | VASTY2(5)  | ,716                | 4,072 |
|                     | VASTY2(6)  | ,044                | ,978  |
|                     | VASTY2(7)  | ,872                | 4,516 |
|                     | VASTY2(8)  | ,576                | 3,339 |
|                     | VASTY2(9)  | 1,441               | 6,817 |
|                     | VASTY2(10) | 1,984               | 9,073 |
|                     | VASTY2(11) | 1,475               | 6,867 |
|                     | VASTY2(12) | ,806                | 4,246 |
|                     | VASTY2(13) | 2,037               | 9,322 |
|                     | VASTY2(14) | ,486                | 2,930 |
|                     | VASTY2(15) | ,045                | ,979  |
|                     | VASTY2(16) | ,183                | 2,573 |
|                     | VASTY2(17) | ,294                | 2,173 |
|                     | VASTY2(18) | ,097                | 1,384 |
|                     | VASTY2(19) | ,015                | ,965  |
|                     | VASTY2(20) | ,670                | 3,916 |
|                     | VASTY2(21) | ,048                | 1,043 |
|                     | VASTY2(22) | ,134                | 1,438 |
|                     | VASTY2(23) | ,511                | 3,054 |
|                     | VASTY2(24) | ,131                | 1,409 |
|                     | VASTY2(25) | ,061                | 1,325 |
|                     | VASTY2(26) | ,017                | 1,082 |

review only

Variables in the Equation

|            | B      | S.E. | Wald    | df | Sig. | Exp(B) |
|------------|--------|------|---------|----|------|--------|
| VASTY2(27) | -,859  | ,608 | 1,993   | 1  | ,158 | ,424   |
| VASTY2(28) | -,164  | ,573 | ,082    | 1  | ,774 | ,849   |
| VASTY2(29) | -,476  | ,542 | ,771    | 1  | ,380 | ,621   |
| VASTY2(30) | -,220  | ,511 | ,185    | 1  | ,667 | ,803   |
| VASTY2(31) | 1,352  | ,399 | 11,499  | 1  | ,001 | 3,863  |
| VASTY2(32) | -,141  | ,521 | ,073    | 1  | ,787 | ,869   |
| VASTY2(33) | -,149  | ,521 | ,082    | 1  | ,774 | ,861   |
| VASTY2(34) | -1,106 | ,671 | 2,717   | 1  | ,099 | ,331   |
| VASTY2(35) | ,154   | ,479 | ,104    | 1  | ,747 | 1,167  |
| Constant   | -3,652 | ,344 | 112,787 | 1  | ,000 | ,026   |

Variables in the Equation

|            | 95% C.I. for EXP(B) |       |
|------------|---------------------|-------|
|            | Lower               | Upper |
| VASTY2(27) | ,129                | 1,396 |
| VASTY2(28) | ,276                | 2,606 |
| VASTY2(29) | ,215                | 1,796 |
| VASTY2(30) | ,295                | 2,185 |
| VASTY2(31) | 1,769               | 8,437 |
| VASTY2(32) | ,313                | 2,410 |
| VASTY2(33) | ,310                | 2,389 |
| VASTY2(34) | ,089                | 1,233 |
| VASTY2(35) | ,457                | 2,982 |
| Constant   |                     |       |

a. Variable(s) entered on step 1: sv3, VASTY2.

```
LOGISTIC REGRESSION VARIABLES seurauslt3
  /METHOD=ENTER sv5 VASTY2
  /CONTRAST (sv5)=Indicator(1)
  /CONTRAST (VASTY2)=Indicator(1)
  /PRINT=CI(95)
  /CRITERIA=PIN(0.05) POUT(0.10) ITERATE(20) CUT(0.5).
```

## Logistic Regression

[DataSet6] C:\cWordjan\Rafaela\_VCS\alla\_tillsammans\abo\_bjo\_vasa\_v1.sav

1  
2  
3  
4  
5  
6  
7  
8  
9  
10  
11  
12  
13  
14  
15  
16  
17

### Case Processing Summary

| Unweighted Cases <sup>a</sup> |                      | N     | Percent |
|-------------------------------|----------------------|-------|---------|
| Selected Cases                | Included in Analysis | 12475 | 100,0   |
|                               | Missing Cases        | 0     | ,0      |
|                               | Total                | 12475 | 100,0   |
| Unselected Cases              |                      | 0     | ,0      |
| Total                         |                      | 12475 | 100,0   |

a. If weight is in effect, see classification table for the total number of cases.

18  
19  
20  
21  
22

### Dependent Variable Encoding

| Original Value                    | Internal Value |
|-----------------------------------|----------------|
| 0 ingen händelse eller ei haittaa | 0              |
| 1 haitta (i någon form)           | 1              |

23  
24  
25  
26  
27  
28  
29  
30  
31  
32  
33  
34  
35  
36  
37  
38  
39  
40  
41  
42  
43  
44  
45  
46  
47  
48  
49  
50  
51  
52  
53  
54  
55  
56  
57  
58  
59  
60

### Categorical Variables Codings

|                                     | Frequency | Parameter coding |       |       |
|-------------------------------------|-----------|------------------|-------|-------|
|                                     |           | (1)              | (2)   | (3)   |
| VASTY2 (SAIR*10000)+VASTY 403073101 | 365       | ,000             | ,000  | ,000  |
| 403073102                           | 362       | 1,000            | ,000  | ,000  |
| 403073103                           | 365       | ,000             | 1,000 | ,000  |
| 403073202                           | 365       | ,000             | ,000  | 1,000 |
| 403073203                           | 365       | ,000             | ,000  | ,000  |
| 403073204                           | 330       | ,000             | ,000  | ,000  |
| 403073303                           | 364       | ,000             | ,000  | ,000  |
| 403073651                           | 362       | ,000             | ,000  | ,000  |
| 403073771                           | 365       | ,000             | ,000  | ,000  |
| 403133102                           | 341       | ,000             | ,000  | ,000  |
| 403133106                           | 365       | ,000             | ,000  | ,000  |
| 403133107                           | 365       | ,000             | ,000  | ,000  |
| 403133109                           | 365       | ,000             | ,000  | ,000  |
| 403133202                           | 365       | ,000             | ,000  | ,000  |
| 403133203                           | 365       | ,000             | ,000  | ,000  |
| 403133204                           | 365       | ,000             | ,000  | ,000  |
| 403133315                           | 177       | ,000             | ,000  | ,000  |
| 403133322                           | 365       | ,000             | ,000  | ,000  |
| 403133401                           | 362       | ,000             | ,000  | ,000  |
| 403133402                           | 365       | ,000             | ,000  | ,000  |
| 403133550                           | 298       | ,000             | ,000  | ,000  |
| 403133772                           | 365       | ,000             | ,000  | ,000  |
| 403135803                           | 365       | ,000             | ,000  | ,000  |
| 404060001                           | 365       | ,000             | ,000  | ,000  |
| 404060002                           | 366       | ,000             | ,000  | ,000  |
| 404310003                           | 291       | ,000             | ,000  | ,000  |
| 404310004                           | 291       | ,000             | ,000  | ,000  |

Page 279

## Categorical Variables Codings

|                           |           | Parameter coding |       |       |       |
|---------------------------|-----------|------------------|-------|-------|-------|
|                           |           | (4)              | (5)   | (6)   | (7)   |
| VASTY2 (SAIR*10000)+VASTY | 403073101 | ,000             | ,000  | ,000  | ,000  |
|                           | 403073102 | ,000             | ,000  | ,000  | ,000  |
|                           | 403073103 | ,000             | ,000  | ,000  | ,000  |
|                           | 403073202 | ,000             | ,000  | ,000  | ,000  |
|                           | 403073203 | 1,000            | ,000  | ,000  | ,000  |
|                           | 403073204 | ,000             | 1,000 | ,000  | ,000  |
|                           | 403073303 | ,000             | ,000  | 1,000 | ,000  |
|                           | 403073651 | ,000             | ,000  | ,000  | 1,000 |
|                           | 403073771 | ,000             | ,000  | ,000  | ,000  |
|                           | 403133102 | ,000             | ,000  | ,000  | ,000  |
|                           | 403133106 | ,000             | ,000  | ,000  | ,000  |
|                           | 403133107 | ,000             | ,000  | ,000  | ,000  |
|                           | 403133109 | ,000             | ,000  | ,000  | ,000  |
|                           | 403133202 | ,000             | ,000  | ,000  | ,000  |
|                           | 403133203 | ,000             | ,000  | ,000  | ,000  |
|                           | 403133204 | ,000             | ,000  | ,000  | ,000  |
|                           | 403133315 | ,000             | ,000  | ,000  | ,000  |
|                           | 403133322 | ,000             | ,000  | ,000  | ,000  |
|                           | 403133401 | ,000             | ,000  | ,000  | ,000  |
|                           | 403133402 | ,000             | ,000  | ,000  | ,000  |
|                           | 403133550 | ,000             | ,000  | ,000  | ,000  |
|                           | 403133772 | ,000             | ,000  | ,000  | ,000  |
|                           | 403135803 | ,000             | ,000  | ,000  | ,000  |
|                           | 404060001 | ,000             | ,000  | ,000  | ,000  |
|                           | 404060002 | ,000             | ,000  | ,000  | ,000  |
|                           | 404310003 | ,000             | ,000  | ,000  | ,000  |
|                           | 404310004 | ,000             | ,000  | ,000  | ,000  |

## Categorical Variables Codings

|                           |           | Parameter coding |       |       |       |
|---------------------------|-----------|------------------|-------|-------|-------|
|                           |           | (8)              | (9)   | (10)  | (11)  |
| VASTY2 (SAIR*10000)+VASTY | 403073101 | ,000             | ,000  | ,000  | ,000  |
|                           | 403073102 | ,000             | ,000  | ,000  | ,000  |
|                           | 403073103 | ,000             | ,000  | ,000  | ,000  |
|                           | 403073202 | ,000             | ,000  | ,000  | ,000  |
|                           | 403073203 | ,000             | ,000  | ,000  | ,000  |
|                           | 403073204 | ,000             | ,000  | ,000  | ,000  |
|                           | 403073303 | ,000             | ,000  | ,000  | ,000  |
|                           | 403073651 | ,000             | ,000  | ,000  | ,000  |
|                           | 403073771 | 1,000            | ,000  | ,000  | ,000  |
|                           | 403133102 | ,000             | 1,000 | ,000  | ,000  |
|                           | 403133106 | ,000             | ,000  | 1,000 | ,000  |
|                           | 403133107 | ,000             | ,000  | ,000  | 1,000 |
|                           | 403133109 | ,000             | ,000  | ,000  | ,000  |
|                           | 403133202 | ,000             | ,000  | ,000  | ,000  |
|                           | 403133203 | ,000             | ,000  | ,000  | ,000  |
|                           | 403133204 | ,000             | ,000  | ,000  | ,000  |
|                           | 403133315 | ,000             | ,000  | ,000  | ,000  |
|                           | 403133322 | ,000             | ,000  | ,000  | ,000  |
|                           | 403133401 | ,000             | ,000  | ,000  | ,000  |
|                           | 403133402 | ,000             | ,000  | ,000  | ,000  |
|                           | 403133550 | ,000             | ,000  | ,000  | ,000  |
|                           | 403133772 | ,000             | ,000  | ,000  | ,000  |
|                           | 403135803 | ,000             | ,000  | ,000  | ,000  |
|                           | 404060001 | ,000             | ,000  | ,000  | ,000  |
|                           | 404060002 | ,000             | ,000  | ,000  | ,000  |
|                           | 404310003 | ,000             | ,000  | ,000  | ,000  |
|                           | 404310004 | ,000             | ,000  | ,000  | ,000  |



## Categorical Variables Codings

|                           |           | Parameter coding |       |       |       |
|---------------------------|-----------|------------------|-------|-------|-------|
|                           |           | (12)             | (13)  | (14)  | (15)  |
| VASTY2 (SAIR*10000)+VASTY | 403073101 | ,000             | ,000  | ,000  | ,000  |
|                           | 403073102 | ,000             | ,000  | ,000  | ,000  |
|                           | 403073103 | ,000             | ,000  | ,000  | ,000  |
|                           | 403073202 | ,000             | ,000  | ,000  | ,000  |
|                           | 403073203 | ,000             | ,000  | ,000  | ,000  |
|                           | 403073204 | ,000             | ,000  | ,000  | ,000  |
|                           | 403073303 | ,000             | ,000  | ,000  | ,000  |
|                           | 403073651 | ,000             | ,000  | ,000  | ,000  |
|                           | 403073771 | ,000             | ,000  | ,000  | ,000  |
|                           | 403133102 | ,000             | ,000  | ,000  | ,000  |
|                           | 403133106 | ,000             | ,000  | ,000  | ,000  |
|                           | 403133107 | ,000             | ,000  | ,000  | ,000  |
|                           | 403133109 | 1,000            | ,000  | ,000  | ,000  |
|                           | 403133202 | ,000             | 1,000 | ,000  | ,000  |
|                           | 403133203 | ,000             | ,000  | 1,000 | ,000  |
|                           | 403133204 | ,000             | ,000  | ,000  | 1,000 |
|                           | 403133315 | ,000             | ,000  | ,000  | ,000  |
|                           | 403133322 | ,000             | ,000  | ,000  | ,000  |
|                           | 403133401 | ,000             | ,000  | ,000  | ,000  |
|                           | 403133402 | ,000             | ,000  | ,000  | ,000  |
|                           | 403133550 | ,000             | ,000  | ,000  | ,000  |
|                           | 403133772 | ,000             | ,000  | ,000  | ,000  |
|                           | 403135803 | ,000             | ,000  | ,000  | ,000  |
|                           | 404060001 | ,000             | ,000  | ,000  | ,000  |
|                           | 404060002 | ,000             | ,000  | ,000  | ,000  |
|                           | 404310003 | ,000             | ,000  | ,000  | ,000  |
|                           | 404310004 | ,000             | ,000  | ,000  | ,000  |

## Categorical Variables Codings

|                           |           | Parameter coding |       |       |       |
|---------------------------|-----------|------------------|-------|-------|-------|
|                           |           | (16)             | (17)  | (18)  | (19)  |
| VASTY2 (SAIR*10000)+VASTY | 403073101 | ,000             | ,000  | ,000  | ,000  |
|                           | 403073102 | ,000             | ,000  | ,000  | ,000  |
|                           | 403073103 | ,000             | ,000  | ,000  | ,000  |
|                           | 403073202 | ,000             | ,000  | ,000  | ,000  |
|                           | 403073203 | ,000             | ,000  | ,000  | ,000  |
|                           | 403073204 | ,000             | ,000  | ,000  | ,000  |
|                           | 403073303 | ,000             | ,000  | ,000  | ,000  |
|                           | 403073651 | ,000             | ,000  | ,000  | ,000  |
|                           | 403073771 | ,000             | ,000  | ,000  | ,000  |
|                           | 403133102 | ,000             | ,000  | ,000  | ,000  |
|                           | 403133106 | ,000             | ,000  | ,000  | ,000  |
|                           | 403133107 | ,000             | ,000  | ,000  | ,000  |
|                           | 403133109 | ,000             | ,000  | ,000  | ,000  |
|                           | 403133202 | ,000             | ,000  | ,000  | ,000  |
|                           | 403133203 | ,000             | ,000  | ,000  | ,000  |
|                           | 403133204 | ,000             | ,000  | ,000  | ,000  |
|                           | 403133315 | 1,000            | ,000  | ,000  | ,000  |
|                           | 403133322 | ,000             | 1,000 | ,000  | ,000  |
|                           | 403133401 | ,000             | ,000  | 1,000 | ,000  |
|                           | 403133402 | ,000             | ,000  | ,000  | 1,000 |
|                           | 403133550 | ,000             | ,000  | ,000  | ,000  |
|                           | 403133772 | ,000             | ,000  | ,000  | ,000  |
|                           | 403135803 | ,000             | ,000  | ,000  | ,000  |
|                           | 404060001 | ,000             | ,000  | ,000  | ,000  |
|                           | 404060002 | ,000             | ,000  | ,000  | ,000  |
|                           | 404310003 | ,000             | ,000  | ,000  | ,000  |
|                           | 404310004 | ,000             | ,000  | ,000  | ,000  |

## Categorical Variables Codings

|                           |           | Parameter coding |       |       |       |
|---------------------------|-----------|------------------|-------|-------|-------|
|                           |           | (20)             | (21)  | (22)  | (23)  |
| VASTY2 (SAIR*10000)+VASTY | 403073101 | ,000             | ,000  | ,000  | ,000  |
|                           | 403073102 | ,000             | ,000  | ,000  | ,000  |
|                           | 403073103 | ,000             | ,000  | ,000  | ,000  |
|                           | 403073202 | ,000             | ,000  | ,000  | ,000  |
|                           | 403073203 | ,000             | ,000  | ,000  | ,000  |
|                           | 403073204 | ,000             | ,000  | ,000  | ,000  |
|                           | 403073303 | ,000             | ,000  | ,000  | ,000  |
|                           | 403073651 | ,000             | ,000  | ,000  | ,000  |
|                           | 403073771 | ,000             | ,000  | ,000  | ,000  |
|                           | 403133102 | ,000             | ,000  | ,000  | ,000  |
|                           | 403133106 | ,000             | ,000  | ,000  | ,000  |
|                           | 403133107 | ,000             | ,000  | ,000  | ,000  |
|                           | 403133109 | ,000             | ,000  | ,000  | ,000  |
|                           | 403133202 | ,000             | ,000  | ,000  | ,000  |
|                           | 403133203 | ,000             | ,000  | ,000  | ,000  |
|                           | 403133204 | ,000             | ,000  | ,000  | ,000  |
|                           | 403133315 | ,000             | ,000  | ,000  | ,000  |
|                           | 403133322 | ,000             | ,000  | ,000  | ,000  |
|                           | 403133401 | ,000             | ,000  | ,000  | ,000  |
|                           | 403133402 | ,000             | ,000  | ,000  | ,000  |
|                           | 403133550 | 1,000            | ,000  | ,000  | ,000  |
|                           | 403133772 | ,000             | 1,000 | ,000  | ,000  |
|                           | 403135803 | ,000             | ,000  | 1,000 | ,000  |
|                           | 404060001 | ,000             | ,000  | ,000  | 1,000 |
|                           | 404060002 | ,000             | ,000  | ,000  | ,000  |
|                           | 404310003 | ,000             | ,000  | ,000  | ,000  |
|                           | 404310004 | ,000             | ,000  | ,000  | ,000  |

## Categorical Variables Codings

|                           |           | Parameter coding |       |       |      |
|---------------------------|-----------|------------------|-------|-------|------|
|                           |           | (24)             | (25)  | (26)  | (27) |
| VASTY2 (SAIR*10000)+VASTY | 403073101 | ,000             | ,000  | ,000  | ,000 |
|                           | 403073102 | ,000             | ,000  | ,000  | ,000 |
|                           | 403073103 | ,000             | ,000  | ,000  | ,000 |
|                           | 403073202 | ,000             | ,000  | ,000  | ,000 |
|                           | 403073203 | ,000             | ,000  | ,000  | ,000 |
|                           | 403073204 | ,000             | ,000  | ,000  | ,000 |
|                           | 403073303 | ,000             | ,000  | ,000  | ,000 |
|                           | 403073651 | ,000             | ,000  | ,000  | ,000 |
|                           | 403073771 | ,000             | ,000  | ,000  | ,000 |
|                           | 403133102 | ,000             | ,000  | ,000  | ,000 |
|                           | 403133106 | ,000             | ,000  | ,000  | ,000 |
|                           | 403133107 | ,000             | ,000  | ,000  | ,000 |
|                           | 403133109 | ,000             | ,000  | ,000  | ,000 |
|                           | 403133202 | ,000             | ,000  | ,000  | ,000 |
|                           | 403133203 | ,000             | ,000  | ,000  | ,000 |
|                           | 403133204 | ,000             | ,000  | ,000  | ,000 |
|                           | 403133315 | ,000             | ,000  | ,000  | ,000 |
|                           | 403133322 | ,000             | ,000  | ,000  | ,000 |
|                           | 403133401 | ,000             | ,000  | ,000  | ,000 |
|                           | 403133402 | ,000             | ,000  | ,000  | ,000 |
|                           | 403133550 | ,000             | ,000  | ,000  | ,000 |
|                           | 403133772 | ,000             | ,000  | ,000  | ,000 |
|                           | 403135803 | ,000             | ,000  | ,000  | ,000 |
|                           | 404060001 | ,000             | ,000  | ,000  | ,000 |
|                           | 404060002 | 1,000            | ,000  | ,000  | ,000 |
|                           | 404310003 | ,000             | 1,000 | ,000  | ,000 |
|                           | 404310004 | ,000             | ,000  | 1,000 | ,000 |

## Categorical Variables Codings

|                           |           | Parameter coding |      |      |      |
|---------------------------|-----------|------------------|------|------|------|
|                           |           | (28)             | (29) | (30) | (31) |
| VASTY2 (SAIR*10000)+VASTY | 403073101 | ,000             | ,000 | ,000 | ,000 |
|                           | 403073102 | ,000             | ,000 | ,000 | ,000 |
|                           | 403073103 | ,000             | ,000 | ,000 | ,000 |
|                           | 403073202 | ,000             | ,000 | ,000 | ,000 |
|                           | 403073203 | ,000             | ,000 | ,000 | ,000 |
|                           | 403073204 | ,000             | ,000 | ,000 | ,000 |
|                           | 403073303 | ,000             | ,000 | ,000 | ,000 |
|                           | 403073651 | ,000             | ,000 | ,000 | ,000 |
|                           | 403073771 | ,000             | ,000 | ,000 | ,000 |
|                           | 403133102 | ,000             | ,000 | ,000 | ,000 |
|                           | 403133106 | ,000             | ,000 | ,000 | ,000 |
|                           | 403133107 | ,000             | ,000 | ,000 | ,000 |
|                           | 403133109 | ,000             | ,000 | ,000 | ,000 |
|                           | 403133202 | ,000             | ,000 | ,000 | ,000 |
|                           | 403133203 | ,000             | ,000 | ,000 | ,000 |
|                           | 403133204 | ,000             | ,000 | ,000 | ,000 |
|                           | 403133315 | ,000             | ,000 | ,000 | ,000 |
|                           | 403133322 | ,000             | ,000 | ,000 | ,000 |
|                           | 403133401 | ,000             | ,000 | ,000 | ,000 |
|                           | 403133402 | ,000             | ,000 | ,000 | ,000 |
|                           | 403133550 | ,000             | ,000 | ,000 | ,000 |
|                           | 403133772 | ,000             | ,000 | ,000 | ,000 |
|                           | 403135803 | ,000             | ,000 | ,000 | ,000 |
|                           | 404060001 | ,000             | ,000 | ,000 | ,000 |
|                           | 404060002 | ,000             | ,000 | ,000 | ,000 |
|                           | 404310003 | ,000             | ,000 | ,000 | ,000 |
|                           | 404310004 | ,000             | ,000 | ,000 | ,000 |

## Categorical Variables Codings

|                           |           | Parameter coding |      |      |      |
|---------------------------|-----------|------------------|------|------|------|
|                           |           | (32)             | (33) | (34) | (35) |
| VASTY2 (SAIR*10000)+VASTY | 403073101 | ,000             | ,000 | ,000 | ,000 |
|                           | 403073102 | ,000             | ,000 | ,000 | ,000 |
|                           | 403073103 | ,000             | ,000 | ,000 | ,000 |
|                           | 403073202 | ,000             | ,000 | ,000 | ,000 |
|                           | 403073203 | ,000             | ,000 | ,000 | ,000 |
|                           | 403073204 | ,000             | ,000 | ,000 | ,000 |
|                           | 403073303 | ,000             | ,000 | ,000 | ,000 |
|                           | 403073651 | ,000             | ,000 | ,000 | ,000 |
|                           | 403073771 | ,000             | ,000 | ,000 | ,000 |
|                           | 403133102 | ,000             | ,000 | ,000 | ,000 |
|                           | 403133106 | ,000             | ,000 | ,000 | ,000 |
|                           | 403133107 | ,000             | ,000 | ,000 | ,000 |
|                           | 403133109 | ,000             | ,000 | ,000 | ,000 |
|                           | 403133202 | ,000             | ,000 | ,000 | ,000 |
|                           | 403133203 | ,000             | ,000 | ,000 | ,000 |
|                           | 403133204 | ,000             | ,000 | ,000 | ,000 |
|                           | 403133315 | ,000             | ,000 | ,000 | ,000 |
|                           | 403133322 | ,000             | ,000 | ,000 | ,000 |
|                           | 403133401 | ,000             | ,000 | ,000 | ,000 |
|                           | 403133402 | ,000             | ,000 | ,000 | ,000 |
|                           | 403133550 | ,000             | ,000 | ,000 | ,000 |
|                           | 403133772 | ,000             | ,000 | ,000 | ,000 |
|                           | 403135803 | ,000             | ,000 | ,000 | ,000 |
|                           | 404060001 | ,000             | ,000 | ,000 | ,000 |
|                           | 404060002 | ,000             | ,000 | ,000 | ,000 |
|                           | 404310003 | ,000             | ,000 | ,000 | ,000 |
|                           | 404310004 | ,000             | ,000 | ,000 | ,000 |

## Categorical Variables Codings

|                            |                    | Frequency | Parameter coding |       |       |
|----------------------------|--------------------|-----------|------------------|-------|-------|
|                            |                    |           | (1)              | (2)   | (3)   |
|                            | 502300005          | 366       | ,000             | ,000  | ,000  |
|                            | 502300006          | 225       | ,000             | ,000  | ,000  |
|                            | 502300007          | 366       | ,000             | ,000  | ,000  |
|                            | 502300214          | 366       | ,000             | ,000  | ,000  |
|                            | 502300411          | 366       | ,000             | ,000  | ,000  |
|                            | 502300415          | 360       | ,000             | ,000  | ,000  |
|                            | 502300416          | 363       | ,000             | ,000  | ,000  |
|                            | 502300811          | 364       | ,000             | ,000  | ,000  |
|                            | 502300913          | 315       | ,000             | ,000  | ,000  |
| sv5 kvintiler för standard | 1 tredje kvintilen | 1863      | ,000             | ,000  | ,000  |
|                            | 2 första kvintilen | 3570      | 1,000            | ,000  | ,000  |
|                            | 3 andra kvintilen  | 1759      | ,000             | 1,000 | ,000  |
|                            | 4 fjärde kvintilen | 2327      | ,000             | ,000  | 1,000 |
|                            | 5 femte kvintilen  | 2956      | ,000             | ,000  | ,000  |

## Categorical Variables Codings

|                            |                    | Parameter coding |      |      |      |
|----------------------------|--------------------|------------------|------|------|------|
|                            |                    | (4)              | (5)  | (6)  | (7)  |
|                            | 502300005          | ,000             | ,000 | ,000 | ,000 |
|                            | 502300006          | ,000             | ,000 | ,000 | ,000 |
|                            | 502300007          | ,000             | ,000 | ,000 | ,000 |
|                            | 502300214          | ,000             | ,000 | ,000 | ,000 |
|                            | 502300411          | ,000             | ,000 | ,000 | ,000 |
|                            | 502300415          | ,000             | ,000 | ,000 | ,000 |
|                            | 502300416          | ,000             | ,000 | ,000 | ,000 |
|                            | 502300811          | ,000             | ,000 | ,000 | ,000 |
|                            | 502300913          | ,000             | ,000 | ,000 | ,000 |
| sv5 kvintiler för standard | 1 tredje kvintilen | ,000             |      |      |      |
|                            | 2 första kvintilen | ,000             |      |      |      |
|                            | 3 andra kvintilen  | ,000             |      |      |      |
|                            | 4 fjärde kvintilen | ,000             |      |      |      |
|                            | 5 femte kvintilen  | 1,000            |      |      |      |

## Categorical Variables Codings

|                            |                    | Parameter coding |      |      |      |
|----------------------------|--------------------|------------------|------|------|------|
|                            |                    | (8)              | (9)  | (10) | (11) |
|                            | 502300005          | ,000             | ,000 | ,000 | ,000 |
|                            | 502300006          | ,000             | ,000 | ,000 | ,000 |
|                            | 502300007          | ,000             | ,000 | ,000 | ,000 |
|                            | 502300214          | ,000             | ,000 | ,000 | ,000 |
|                            | 502300411          | ,000             | ,000 | ,000 | ,000 |
|                            | 502300415          | ,000             | ,000 | ,000 | ,000 |
|                            | 502300416          | ,000             | ,000 | ,000 | ,000 |
|                            | 502300811          | ,000             | ,000 | ,000 | ,000 |
|                            | 502300913          | ,000             | ,000 | ,000 | ,000 |
| sv5 kvintiler för standard | 1 tredje kvintilen |                  |      |      |      |
|                            | 2 första kvintilen |                  |      |      |      |
|                            | 3 andra kvintilen  |                  |      |      |      |
|                            | 4 fjärde kvintilen |                  |      |      |      |
|                            | 5 femte kvintilen  |                  |      |      |      |

## Categorical Variables Codings

|                            |                    | Parameter coding |      |      |      |
|----------------------------|--------------------|------------------|------|------|------|
|                            |                    | (12)             | (13) | (14) | (15) |
|                            | 502300005          | ,000             | ,000 | ,000 | ,000 |
|                            | 502300006          | ,000             | ,000 | ,000 | ,000 |
|                            | 502300007          | ,000             | ,000 | ,000 | ,000 |
|                            | 502300214          | ,000             | ,000 | ,000 | ,000 |
|                            | 502300411          | ,000             | ,000 | ,000 | ,000 |
|                            | 502300415          | ,000             | ,000 | ,000 | ,000 |
|                            | 502300416          | ,000             | ,000 | ,000 | ,000 |
|                            | 502300811          | ,000             | ,000 | ,000 | ,000 |
|                            | 502300913          | ,000             | ,000 | ,000 | ,000 |
| sv5 kvintiler för standard | 1 tredje kvintilen |                  |      |      |      |
|                            | 2 första kvintilen |                  |      |      |      |
|                            | 3 andra kvintilen  |                  |      |      |      |
|                            | 4 fjärde kvintilen |                  |      |      |      |
|                            | 5 femte kvintilen  |                  |      |      |      |



## Categorical Variables Codings

|                            |                    | Parameter coding |      |      |      |
|----------------------------|--------------------|------------------|------|------|------|
|                            |                    | (16)             | (17) | (18) | (19) |
|                            | 502300005          | ,000             | ,000 | ,000 | ,000 |
|                            | 502300006          | ,000             | ,000 | ,000 | ,000 |
|                            | 502300007          | ,000             | ,000 | ,000 | ,000 |
|                            | 502300214          | ,000             | ,000 | ,000 | ,000 |
|                            | 502300411          | ,000             | ,000 | ,000 | ,000 |
|                            | 502300415          | ,000             | ,000 | ,000 | ,000 |
|                            | 502300416          | ,000             | ,000 | ,000 | ,000 |
|                            | 502300811          | ,000             | ,000 | ,000 | ,000 |
|                            | 502300913          | ,000             | ,000 | ,000 | ,000 |
| sv5 kvintiler för standard | 1 tredje kvintilen |                  |      |      |      |
|                            | 2 första kvintilen |                  |      |      |      |
|                            | 3 andra kvintilen  |                  |      |      |      |
|                            | 4 fjärde kvintilen |                  |      |      |      |
|                            | 5 femte kvintilen  |                  |      |      |      |

## Categorical Variables Codings

|                            |                    | Parameter coding |      |      |      |
|----------------------------|--------------------|------------------|------|------|------|
|                            |                    | (20)             | (21) | (22) | (23) |
|                            | 502300005          | ,000             | ,000 | ,000 | ,000 |
|                            | 502300006          | ,000             | ,000 | ,000 | ,000 |
|                            | 502300007          | ,000             | ,000 | ,000 | ,000 |
|                            | 502300214          | ,000             | ,000 | ,000 | ,000 |
|                            | 502300411          | ,000             | ,000 | ,000 | ,000 |
|                            | 502300415          | ,000             | ,000 | ,000 | ,000 |
|                            | 502300416          | ,000             | ,000 | ,000 | ,000 |
|                            | 502300811          | ,000             | ,000 | ,000 | ,000 |
|                            | 502300913          | ,000             | ,000 | ,000 | ,000 |
| sv5 kvintiler för standard | 1 tredje kvintilen |                  |      |      |      |
|                            | 2 första kvintilen |                  |      |      |      |
|                            | 3 andra kvintilen  |                  |      |      |      |
|                            | 4 fjärde kvintilen |                  |      |      |      |
|                            | 5 femte kvintilen  |                  |      |      |      |

## Categorical Variables Codings

|                            |                    | Parameter coding |      |      |       |
|----------------------------|--------------------|------------------|------|------|-------|
|                            |                    | (24)             | (25) | (26) | (27)  |
|                            | 502300005          | ,000             | ,000 | ,000 | 1,000 |
|                            | 502300006          | ,000             | ,000 | ,000 | ,000  |
|                            | 502300007          | ,000             | ,000 | ,000 | ,000  |
|                            | 502300214          | ,000             | ,000 | ,000 | ,000  |
|                            | 502300411          | ,000             | ,000 | ,000 | ,000  |
|                            | 502300415          | ,000             | ,000 | ,000 | ,000  |
|                            | 502300416          | ,000             | ,000 | ,000 | ,000  |
|                            | 502300811          | ,000             | ,000 | ,000 | ,000  |
|                            | 502300913          | ,000             | ,000 | ,000 | ,000  |
| sv5 kvintiler för standard | 1 tredje kvintilen |                  |      |      |       |
|                            | 2 första kvintilen |                  |      |      |       |
|                            | 3 andra kvintilen  |                  |      |      |       |
|                            | 4 fjärde kvintilen |                  |      |      |       |
|                            | 5 femte kvintilen  |                  |      |      |       |

## Categorical Variables Codings

|                            |                    | Parameter coding |       |       |       |
|----------------------------|--------------------|------------------|-------|-------|-------|
|                            |                    | (28)             | (29)  | (30)  | (31)  |
|                            | 502300005          | ,000             | ,000  | ,000  | ,000  |
|                            | 502300006          | 1,000            | ,000  | ,000  | ,000  |
|                            | 502300007          | ,000             | 1,000 | ,000  | ,000  |
|                            | 502300214          | ,000             | ,000  | 1,000 | ,000  |
|                            | 502300411          | ,000             | ,000  | ,000  | 1,000 |
|                            | 502300415          | ,000             | ,000  | ,000  | ,000  |
|                            | 502300416          | ,000             | ,000  | ,000  | ,000  |
|                            | 502300811          | ,000             | ,000  | ,000  | ,000  |
|                            | 502300913          | ,000             | ,000  | ,000  | ,000  |
| sv5 kvintiler för standard | 1 tredje kvintilen |                  |       |       |       |
|                            | 2 första kvintilen |                  |       |       |       |
|                            | 3 andra kvintilen  |                  |       |       |       |
|                            | 4 fjärde kvintilen |                  |       |       |       |
|                            | 5 femte kvintilen  |                  |       |       |       |

## Categorical Variables Codings

|                            |                    | Parameter coding |       |       |       |
|----------------------------|--------------------|------------------|-------|-------|-------|
|                            |                    | (32)             | (33)  | (34)  | (35)  |
|                            | 502300005          | ,000             | ,000  | ,000  | ,000  |
|                            | 502300006          | ,000             | ,000  | ,000  | ,000  |
|                            | 502300007          | ,000             | ,000  | ,000  | ,000  |
|                            | 502300214          | ,000             | ,000  | ,000  | ,000  |
|                            | 502300411          | ,000             | ,000  | ,000  | ,000  |
|                            | 502300415          | 1,000            | ,000  | ,000  | ,000  |
|                            | 502300416          | ,000             | 1,000 | ,000  | ,000  |
|                            | 502300811          | ,000             | ,000  | 1,000 | ,000  |
|                            | 502300913          | ,000             | ,000  | ,000  | 1,000 |
| sv5 kvintiler för standard | 1 tredje kvintilen |                  |       |       |       |
|                            | 2 första kvintilen |                  |       |       |       |
|                            | 3 andra kvintilen  |                  |       |       |       |
|                            | 4 fjärde kvintilen |                  |       |       |       |
|                            | 5 femte kvintilen  |                  |       |       |       |

## Block 0: Beginning Block

Classification Table<sup>a,b</sup>

|                    |                                                   |                                                              |
|--------------------|---------------------------------------------------|--------------------------------------------------------------|
| Observed           |                                                   |                                                              |
| Step 0             | seuraust3 seuraus highest = haitta (i någon form) | 0 ingen händelse eller ei haittaa<br>1 haitta (i någon form) |
| Overall Percentage |                                                   |                                                              |

Classification Table<sup>a,b</sup>

| Observed           |                                                   | Predicted                                                    |                                         |
|--------------------|---------------------------------------------------|--------------------------------------------------------------|-----------------------------------------|
|                    |                                                   | seuraust3<br>seuraus highest                                 | 0 ingen<br>händelse eller<br>ei haittaa |
| Step 0             | seuraust3 seuraus highest = haitta (i någon form) | 0 ingen händelse eller ei haittaa<br>1 haitta (i någon form) | 12075<br>400                            |
| Overall Percentage |                                                   |                                                              |                                         |

Classification Table<sup>a,b</sup>

| Observed           |                                                   |                                                              | Predicted                       |                            |
|--------------------|---------------------------------------------------|--------------------------------------------------------------|---------------------------------|----------------------------|
|                    |                                                   |                                                              | seuraust3<br>seuraus highest .. | 1 haitta (i<br>någon form) |
| Step 0             | seuraust3 seuraus highest = haitta (i någon form) | 0 ingen händelse eller ei haittaa<br>1 haitta (i någon form) | 0                               | 0                          |
| Overall Percentage |                                                   |                                                              |                                 |                            |

Classification Table<sup>a,b</sup>

| Observed           |                                                   |                                                              | Predicted          |    |
|--------------------|---------------------------------------------------|--------------------------------------------------------------|--------------------|----|
|                    |                                                   |                                                              | Percentage Correct |    |
| Step 0             | seuraust3 seuraus highest = haitta (i någon form) | 0 ingen händelse eller ei haittaa<br>1 haitta (i någon form) | 100,0              | ,0 |
| Overall Percentage |                                                   |                                                              | 96,8               |    |

a. Constant is included in the model.

b. The cut value is ,500

Variables in the Equation

|                 | B      | S.E. | Wald     | df | Sig. | Exp(B) |
|-----------------|--------|------|----------|----|------|--------|
| Step 0 Constant | -3,407 | ,051 | 4495,313 | 1  | ,000 | ,033   |

## Variables not in the Equation

|        |                    |            | Score   | df | Sig. |
|--------|--------------------|------------|---------|----|------|
| Step 0 | Variables          | sv5        | 17,499  | 4  | ,002 |
|        |                    | sv5(1)     | 6,383   | 1  | ,012 |
|        |                    | sv5(2)     | 2,772   | 1  | ,096 |
|        |                    | sv5(3)     | 1,836   | 1  | ,175 |
|        |                    | sv5(4)     | 11,375  | 1  | ,001 |
|        |                    | VASTY2     | 321,056 | 35 | ,000 |
|        |                    | VASTY2(1)  | 1,769   | 1  | ,184 |
|        |                    | VASTY2(2)  | 27,206  | 1  | ,000 |
|        |                    | VASTY2(3)  | 8,562   | 1  | ,003 |
|        |                    | VASTY2(4)  | ,988    | 1  | ,320 |
|        |                    | VASTY2(5)  | ,587    | 1  | ,444 |
|        |                    | VASTY2(6)  | 8,528   | 1  | ,003 |
|        |                    | VASTY2(7)  | 2,666   | 1  | ,103 |
|        |                    | VASTY2(8)  | ,008    | 1  | ,929 |
|        |                    | VASTY2(9)  | 19,221  | 1  | ,000 |
|        |                    | VASTY2(10) | 58,192  | 1  | ,000 |
|        |                    | VASTY2(11) | 21,278  | 1  | ,000 |
|        |                    | VASTY2(12) | 2,551   | 1  | ,110 |
|        |                    | VASTY2(13) | 62,883  | 1  | ,000 |
|        |                    | VASTY2(14) | ,045    | 1  | ,832 |
|        |                    | VASTY2(15) | 8,562   | 1  | ,003 |
|        |                    | VASTY2(16) | 1,322   | 1  | ,250 |
|        |                    | VASTY2(17) | 2,012   | 1  | ,156 |
|        |                    | VASTY2(18) | 6,791   | 1  | ,009 |
|        |                    | VASTY2(19) | 10,418  | 1  | ,001 |
|        |                    | VASTY2(20) | ,662    | 1  | ,416 |
|        |                    | VASTY2(21) | 8,562   | 1  | ,003 |
|        |                    | VASTY2(22) | 5,396   | 1  | ,020 |
|        |                    | VASTY2(23) | ,045    | 1  | ,832 |
|        |                    | VASTY2(24) | 5,427   | 1  | ,020 |
|        |                    | VASTY2(25) | 6,092   | 1  | ,014 |
|        |                    | VASTY2(26) | 7,868   | 1  | ,005 |
|        |                    | VASTY2(27) | 5,427   | 1  | ,020 |
|        |                    | VASTY2(28) | ,715    | 1  | ,398 |
|        |                    | VASTY2(29) | 2,983   | 1  | ,084 |
|        |                    | VASTY2(30) | 2,034   | 1  | ,154 |
|        |                    | VASTY2(31) | 30,255  | 1  | ,000 |
|        |                    | VASTY2(32) | 1,902   | 1  | ,168 |
|        |                    | VASTY2(33) | 1,968   | 1  | ,161 |
|        |                    | VASTY2(34) | 6,856   | 1  | ,009 |
|        |                    | VASTY2(35) | ,127    | 1  | ,722 |
|        | Overall Statistics |            | 323,809 | 39 | ,000 |

**Block 1: Method = Enter****Omnibus Tests of Model Coefficients**

|        |       | Chi-square | df | Sig. |
|--------|-------|------------|----|------|
| Step 1 | Step  | 298,546    | 39 | ,000 |
|        | Block | 298,546    | 39 | ,000 |
|        | Model | 298,546    | 39 | ,000 |

**Model Summary**

| Step | -2 Log likelihood     | Cox & Snell R Square | Nagelkerke R Square |
|------|-----------------------|----------------------|---------------------|
| 1    | 3240,503 <sup>a</sup> | ,024                 | ,096                |

a. Estimation terminated at iteration number 9 because parameter estimates changed by less than ,001.

**Classification Table<sup>a</sup>**

| Observed           |                                                   |                                                              |
|--------------------|---------------------------------------------------|--------------------------------------------------------------|
| Step 1             | seuraust3 seuraus highest = haitta (i någon form) | 0 ingen händelse eller ei haittaa<br>1 haitta (i någon form) |
| Overall Percentage |                                                   |                                                              |

**Classification Table<sup>a</sup>**

| Observed           |                                                   | Predicted                                                    |
|--------------------|---------------------------------------------------|--------------------------------------------------------------|
|                    |                                                   | seuraust3 seuraus highest                                    |
|                    |                                                   | 0 ingen händelse eller ei haittaa                            |
| Step 1             | seuraust3 seuraus highest = haitta (i någon form) | 0 ingen händelse eller ei haittaa<br>1 haitta (i någon form) |
| Overall Percentage |                                                   | 12075<br>400                                                 |

**Classification Table<sup>a</sup>**

| Observed           |                                                   | Predicted                                                    |
|--------------------|---------------------------------------------------|--------------------------------------------------------------|
|                    |                                                   | seuraust3 seuraus highest ..                                 |
|                    |                                                   | 1 haitta (i någon form)                                      |
| Step 1             | seuraust3 seuraus highest = haitta (i någon form) | 0 ingen händelse eller ei haittaa<br>1 haitta (i någon form) |
| Overall Percentage |                                                   | 0<br>0                                                       |

Classification Table<sup>a</sup>

|                    |                                                   |                                   | Predicted          |
|--------------------|---------------------------------------------------|-----------------------------------|--------------------|
| Observed           |                                                   |                                   | Percentage Correct |
| Step 1             | seuraust3 seuraus highest = haitta (i någon form) | 0 ingen händelse eller ei haittaa | 100,0              |
|                    |                                                   | 1 haitta (i någon form)           | ,0                 |
| Overall Percentage |                                                   |                                   | 96,8               |

a. The cut value is ,500

Variables in the Equation

|                     |            | B      | S.E.  | Wald    | df | Sig. | Exp(B) |
|---------------------|------------|--------|-------|---------|----|------|--------|
| Step 1 <sup>a</sup> | sv5        |        |       | 2,683   | 4  | ,612 |        |
|                     | sv5(1)     | ,002   | ,197  | ,000    | 1  | ,991 | 1,002  |
|                     | sv5(2)     | -,114  | ,207  | ,305    | 1  | ,581 | ,892   |
|                     | sv5(3)     | ,102   | ,181  | ,319    | 1  | ,572 | 1,108  |
|                     | sv5(4)     | ,218   | ,193  | 1,276   | 1  | ,259 | 1,244  |
|                     | VASTY2     |        |       | 215,380 | 35 | ,000 |        |
|                     | VASTY2(1)  | ,552   | ,425  | 1,687   | 1  | ,194 | 1,737  |
|                     | VASTY2(2)  | 1,104  | ,398  | 7,707   | 1  | ,006 | 3,017  |
|                     | VASTY2(3)  | -1,501 | ,786  | 3,650   | 1  | ,056 | ,223   |
|                     | VASTY2(4)  | ,539   | ,429  | 1,579   | 1  | ,209 | 1,714  |
|                     | VASTY2(5)  | ,524   | ,444  | 1,395   | 1  | ,238 | 1,689  |
|                     | VASTY2(6)  | -1,685 | ,794  | 4,507   | 1  | ,034 | ,185   |
|                     | VASTY2(7)  | ,675   | ,420  | 2,593   | 1  | ,107 | 1,965  |
|                     | VASTY2(8)  | ,346   | ,449  | ,593    | 1  | ,441 | 1,413  |
|                     | VASTY2(9)  | 1,136  | ,397  | 8,204   | 1  | ,004 | 3,113  |
|                     | VASTY2(10) | 1,351  | ,392  | 11,907  | 1  | ,001 | 3,863  |
|                     | VASTY2(11) | 1,141  | ,393  | 8,452   | 1  | ,004 | 3,131  |
|                     | VASTY2(12) | ,554   | ,425  | 1,701   | 1  | ,192 | 1,740  |
|                     | VASTY2(13) | 1,373  | ,392  | 12,289  | 1  | ,000 | 3,949  |
|                     | VASTY2(14) | ,119   | ,460  | ,067    | 1  | ,796 | 1,126  |
|                     | VASTY2(15) | -1,641 | ,789  | 4,323   | 1  | ,038 | ,194   |
|                     | VASTY2(16) | -,439  | ,675  | ,422    | 1  | ,516 | ,645   |
|                     | VASTY2(17) | -,244  | ,511  | ,229    | 1  | ,633 | ,783   |
|                     | VASTY2(18) | -1,084 | ,684  | 2,515   | 1  | ,113 | ,338   |
|                     | VASTY2(19) | -2,200 | 1,065 | 4,262   | 1  | ,039 | ,111   |
|                     | VASTY2(20) | ,414   | ,453  | ,837    | 1  | ,360 | 1,513  |
|                     | VASTY2(21) | -1,514 | ,786  | 3,711   | 1  | ,054 | ,220   |
|                     | VASTY2(22) | -,831  | ,606  | 1,883   | 1  | ,170 | ,436   |
|                     | VASTY2(23) | ,212   | ,456  | ,217    | 1  | ,642 | 1,237  |
|                     | VASTY2(24) | -,880  | ,607  | 2,103   | 1  | ,147 | ,415   |

## Variables in the Equation

|                     |            | 95% C.I. for EXP(B) |       |
|---------------------|------------|---------------------|-------|
|                     |            | Lower               | Upper |
| Step 1 <sup>a</sup> | sv5        |                     |       |
|                     | sv5(1)     | ,681                | 1,475 |
|                     | sv5(2)     | ,594                | 1,339 |
|                     | sv5(3)     | ,777                | 1,580 |
|                     | sv5(4)     | ,852                | 1,816 |
|                     | VASTY2     |                     |       |
|                     | VASTY2(1)  | ,755                | 3,995 |
|                     | VASTY2(2)  | 1,384               | 6,579 |
|                     | VASTY2(3)  | ,048                | 1,040 |
|                     | VASTY2(4)  | ,740                | 3,974 |
|                     | VASTY2(5)  | ,708                | 4,033 |
|                     | VASTY2(6)  | ,039                | ,879  |
|                     | VASTY2(7)  | ,864                | 4,471 |
|                     | VASTY2(8)  | ,586                | 3,409 |
|                     | VASTY2(9)  | 1,431               | 6,772 |
|                     | VASTY2(10) | 1,793               | 8,323 |
|                     | VASTY2(11) | 1,450               | 6,757 |
|                     | VASTY2(12) | ,757                | 4,000 |
|                     | VASTY2(13) | 1,832               | 8,511 |
|                     | VASTY2(14) | ,458                | 2,772 |
|                     | VASTY2(15) | ,041                | ,910  |
|                     | VASTY2(16) | ,172                | 2,422 |
|                     | VASTY2(17) | ,288                | 2,132 |
|                     | VASTY2(18) | ,089                | 1,292 |
|                     | VASTY2(19) | ,014                | ,895  |
|                     | VASTY2(20) | ,623                | 3,676 |
|                     | VASTY2(21) | ,047                | 1,027 |
|                     | VASTY2(22) | ,133                | 1,427 |
|                     | VASTY2(23) | ,506                | 3,024 |
|                     | VASTY2(24) | ,126                | 1,362 |

review only



Variables in the Equation

|            | B      | S.E.  | Wald    | df | Sig. | Exp(B) |
|------------|--------|-------|---------|----|------|--------|
| VASTY2(25) | -1,260 | ,787  | 2,563   | 1  | ,109 | ,284   |
| VASTY2(26) | -2,018 | 1,057 | 3,643   | 1  | ,056 | ,133   |
| VASTY2(27) | -,929  | ,610  | 2,324   | 1  | ,127 | ,395   |
| VASTY2(28) | -,294  | ,580  | ,257    | 1  | ,612 | ,745   |
| VASTY2(29) | -,611  | ,550  | 1,234   | 1  | ,267 | ,543   |
| VASTY2(30) | -,220  | ,511  | ,184    | 1  | ,668 | ,803   |
| VASTY2(31) | 1,292  | ,403  | 10,262  | 1  | ,001 | 3,639  |
| VASTY2(32) | -,220  | ,526  | ,174    | 1  | ,676 | ,803   |
| VASTY2(33) | -,232  | ,527  | ,193    | 1  | ,661 | ,793   |
| VASTY2(34) | -1,114 | ,671  | 2,757   | 1  | ,097 | ,328   |
| VASTY2(35) | ,112   | ,479  | ,055    | 1  | ,815 | 1,118  |
| Constant   | -3,700 | ,357  | 107,608 | 1  | ,000 | ,025   |

Variables in the Equation

|            | 95% C.I. for EXP(B) |       |
|------------|---------------------|-------|
|            | Lower               | Upper |
| VASTY2(25) | ,061                | 1,327 |
| VASTY2(26) | ,017                | 1,056 |
| VASTY2(27) | ,120                | 1,304 |
| VASTY2(28) | ,239                | 2,321 |
| VASTY2(29) | ,185                | 1,595 |
| VASTY2(30) | ,295                | 2,187 |
| VASTY2(31) | 1,651               | 8,020 |
| VASTY2(32) | ,286                | 2,253 |
| VASTY2(33) | ,282                | 2,230 |
| VASTY2(34) | ,088                | 1,223 |
| VASTY2(35) | ,437                | 2,860 |
| Constant   |                     |       |

a. Variable(s) entered on step 1: sv5, VASTY2.

```
LOGISTIC REGRESSION VARIABLES seurauslt3
  /METHOD=ENTER sv7 VASTY2
  /CONTRAST (sv7)=Indicator(1)
  /CONTRAST (VASTY2)=Indicator(1)
  /PRINT=CI(95)
  /CRITERIA=PIN(0.05) POUT(0.10) ITERATE(20) CUT(0.5).
```

## Logistic Regression

[DataSet6] C:\cWordjan\Rafaela\_VCS\alla\_tillsammans\abo\_bjo\_vasa\_v1.sav

### Case Processing Summary

| Unweighted Cases <sup>a</sup> |                      | N     | Percent |
|-------------------------------|----------------------|-------|---------|
| Selected Cases                | Included in Analysis | 12475 | 100,0   |
|                               | Missing Cases        | 0     | ,0      |
|                               | Total                | 12475 | 100,0   |
| Unselected Cases              |                      | 0     | ,0      |
| Total                         |                      | 12475 | 100,0   |

a. If weight is in effect, see classification table for the total number of cases.

### Dependent Variable Encoding

| Original Value                    | Internal Value |
|-----------------------------------|----------------|
| 0 ingen händelse eller ei haittaa | 0              |
| 1 haitta (i någon form)           | 1              |

### Categorical Variables Codings

|                                     | Frequency | Parameter coding |       |       |
|-------------------------------------|-----------|------------------|-------|-------|
|                                     |           | (1)              | (2)   | (3)   |
| VASTY2 (SAIR*10000)+VASTY 403073101 | 365       | ,000             | ,000  | ,000  |
| 403073102                           | 362       | 1,000            | ,000  | ,000  |
| 403073103                           | 365       | ,000             | 1,000 | ,000  |
| 403073202                           | 365       | ,000             | ,000  | 1,000 |
| 403073203                           | 365       | ,000             | ,000  | ,000  |
| 403073204                           | 330       | ,000             | ,000  | ,000  |
| 403073303                           | 364       | ,000             | ,000  | ,000  |
| 403073651                           | 362       | ,000             | ,000  | ,000  |
| 403073771                           | 365       | ,000             | ,000  | ,000  |
| 403133102                           | 341       | ,000             | ,000  | ,000  |
| 403133106                           | 365       | ,000             | ,000  | ,000  |
| 403133107                           | 365       | ,000             | ,000  | ,000  |
| 403133109                           | 365       | ,000             | ,000  | ,000  |
| 403133202                           | 365       | ,000             | ,000  | ,000  |
| 403133203                           | 365       | ,000             | ,000  | ,000  |
| 403133204                           | 365       | ,000             | ,000  | ,000  |
| 403133315                           | 177       | ,000             | ,000  | ,000  |
| 403133322                           | 365       | ,000             | ,000  | ,000  |
| 403133401                           | 362       | ,000             | ,000  | ,000  |
| 403133402                           | 365       | ,000             | ,000  | ,000  |
| 403133550                           | 298       | ,000             | ,000  | ,000  |
| 403133772                           | 365       | ,000             | ,000  | ,000  |
| 403135803                           | 365       | ,000             | ,000  | ,000  |
| 404060001                           | 365       | ,000             | ,000  | ,000  |
| 404060002                           | 366       | ,000             | ,000  | ,000  |
| 404310003                           | 291       | ,000             | ,000  | ,000  |
| 404310004                           | 291       | ,000             | ,000  | ,000  |

**Categorical Variables Codings**

|                           |           | Parameter coding |       |       |       |
|---------------------------|-----------|------------------|-------|-------|-------|
|                           |           | (4)              | (5)   | (6)   | (7)   |
| VASTY2 (SAIR*10000)+VASTY | 403073101 | ,000             | ,000  | ,000  | ,000  |
|                           | 403073102 | ,000             | ,000  | ,000  | ,000  |
|                           | 403073103 | ,000             | ,000  | ,000  | ,000  |
|                           | 403073202 | ,000             | ,000  | ,000  | ,000  |
|                           | 403073203 | 1,000            | ,000  | ,000  | ,000  |
|                           | 403073204 | ,000             | 1,000 | ,000  | ,000  |
|                           | 403073303 | ,000             | ,000  | 1,000 | ,000  |
|                           | 403073651 | ,000             | ,000  | ,000  | 1,000 |
|                           | 403073771 | ,000             | ,000  | ,000  | ,000  |
|                           | 403133102 | ,000             | ,000  | ,000  | ,000  |
|                           | 403133106 | ,000             | ,000  | ,000  | ,000  |
|                           | 403133107 | ,000             | ,000  | ,000  | ,000  |
|                           | 403133109 | ,000             | ,000  | ,000  | ,000  |
|                           | 403133202 | ,000             | ,000  | ,000  | ,000  |
|                           | 403133203 | ,000             | ,000  | ,000  | ,000  |
|                           | 403133204 | ,000             | ,000  | ,000  | ,000  |
|                           | 403133315 | ,000             | ,000  | ,000  | ,000  |
|                           | 403133322 | ,000             | ,000  | ,000  | ,000  |
|                           | 403133401 | ,000             | ,000  | ,000  | ,000  |
|                           | 403133402 | ,000             | ,000  | ,000  | ,000  |
|                           | 403133550 | ,000             | ,000  | ,000  | ,000  |
|                           | 403133772 | ,000             | ,000  | ,000  | ,000  |
|                           | 403135803 | ,000             | ,000  | ,000  | ,000  |
|                           | 404060001 | ,000             | ,000  | ,000  | ,000  |
|                           | 404060002 | ,000             | ,000  | ,000  | ,000  |
|                           | 404310003 | ,000             | ,000  | ,000  | ,000  |
|                           | 404310004 | ,000             | ,000  | ,000  | ,000  |

## Categorical Variables Codings

|                           |           | Parameter coding |       |       |       |
|---------------------------|-----------|------------------|-------|-------|-------|
|                           |           | (8)              | (9)   | (10)  | (11)  |
| VASTY2 (SAIR*10000)+VASTY | 403073101 | ,000             | ,000  | ,000  | ,000  |
|                           | 403073102 | ,000             | ,000  | ,000  | ,000  |
|                           | 403073103 | ,000             | ,000  | ,000  | ,000  |
|                           | 403073202 | ,000             | ,000  | ,000  | ,000  |
|                           | 403073203 | ,000             | ,000  | ,000  | ,000  |
|                           | 403073204 | ,000             | ,000  | ,000  | ,000  |
|                           | 403073303 | ,000             | ,000  | ,000  | ,000  |
|                           | 403073651 | ,000             | ,000  | ,000  | ,000  |
|                           | 403073771 | 1,000            | ,000  | ,000  | ,000  |
|                           | 403133102 | ,000             | 1,000 | ,000  | ,000  |
|                           | 403133106 | ,000             | ,000  | 1,000 | ,000  |
|                           | 403133107 | ,000             | ,000  | ,000  | 1,000 |
|                           | 403133109 | ,000             | ,000  | ,000  | ,000  |
|                           | 403133202 | ,000             | ,000  | ,000  | ,000  |
|                           | 403133203 | ,000             | ,000  | ,000  | ,000  |
|                           | 403133204 | ,000             | ,000  | ,000  | ,000  |
|                           | 403133315 | ,000             | ,000  | ,000  | ,000  |
|                           | 403133322 | ,000             | ,000  | ,000  | ,000  |
|                           | 403133401 | ,000             | ,000  | ,000  | ,000  |
|                           | 403133402 | ,000             | ,000  | ,000  | ,000  |
|                           | 403133550 | ,000             | ,000  | ,000  | ,000  |
|                           | 403133772 | ,000             | ,000  | ,000  | ,000  |
|                           | 403135803 | ,000             | ,000  | ,000  | ,000  |
|                           | 404060001 | ,000             | ,000  | ,000  | ,000  |
|                           | 404060002 | ,000             | ,000  | ,000  | ,000  |
|                           | 404310003 | ,000             | ,000  | ,000  | ,000  |
|                           | 404310004 | ,000             | ,000  | ,000  | ,000  |

## Categorical Variables Codings

|                           |           | Parameter coding |       |       |       |
|---------------------------|-----------|------------------|-------|-------|-------|
|                           |           | (12)             | (13)  | (14)  | (15)  |
| VASTY2 (SAIR*10000)+VASTY | 403073101 | ,000             | ,000  | ,000  | ,000  |
|                           | 403073102 | ,000             | ,000  | ,000  | ,000  |
|                           | 403073103 | ,000             | ,000  | ,000  | ,000  |
|                           | 403073202 | ,000             | ,000  | ,000  | ,000  |
|                           | 403073203 | ,000             | ,000  | ,000  | ,000  |
|                           | 403073204 | ,000             | ,000  | ,000  | ,000  |
|                           | 403073303 | ,000             | ,000  | ,000  | ,000  |
|                           | 403073651 | ,000             | ,000  | ,000  | ,000  |
|                           | 403073771 | ,000             | ,000  | ,000  | ,000  |
|                           | 403133102 | ,000             | ,000  | ,000  | ,000  |
|                           | 403133106 | ,000             | ,000  | ,000  | ,000  |
|                           | 403133107 | ,000             | ,000  | ,000  | ,000  |
|                           | 403133109 | 1,000            | ,000  | ,000  | ,000  |
|                           | 403133202 | ,000             | 1,000 | ,000  | ,000  |
|                           | 403133203 | ,000             | ,000  | 1,000 | ,000  |
|                           | 403133204 | ,000             | ,000  | ,000  | 1,000 |
|                           | 403133315 | ,000             | ,000  | ,000  | ,000  |
|                           | 403133322 | ,000             | ,000  | ,000  | ,000  |
|                           | 403133401 | ,000             | ,000  | ,000  | ,000  |
|                           | 403133402 | ,000             | ,000  | ,000  | ,000  |
|                           | 403133550 | ,000             | ,000  | ,000  | ,000  |
|                           | 403133772 | ,000             | ,000  | ,000  | ,000  |
|                           | 403135803 | ,000             | ,000  | ,000  | ,000  |
|                           | 404060001 | ,000             | ,000  | ,000  | ,000  |
|                           | 404060002 | ,000             | ,000  | ,000  | ,000  |
|                           | 404310003 | ,000             | ,000  | ,000  | ,000  |
|                           | 404310004 | ,000             | ,000  | ,000  | ,000  |

## Categorical Variables Codings

|                           |           | Parameter coding |       |       |       |
|---------------------------|-----------|------------------|-------|-------|-------|
|                           |           | (16)             | (17)  | (18)  | (19)  |
| VASTY2 (SAIR*10000)+VASTY | 403073101 | ,000             | ,000  | ,000  | ,000  |
|                           | 403073102 | ,000             | ,000  | ,000  | ,000  |
|                           | 403073103 | ,000             | ,000  | ,000  | ,000  |
|                           | 403073202 | ,000             | ,000  | ,000  | ,000  |
|                           | 403073203 | ,000             | ,000  | ,000  | ,000  |
|                           | 403073204 | ,000             | ,000  | ,000  | ,000  |
|                           | 403073303 | ,000             | ,000  | ,000  | ,000  |
|                           | 403073651 | ,000             | ,000  | ,000  | ,000  |
|                           | 403073771 | ,000             | ,000  | ,000  | ,000  |
|                           | 403133102 | ,000             | ,000  | ,000  | ,000  |
|                           | 403133106 | ,000             | ,000  | ,000  | ,000  |
|                           | 403133107 | ,000             | ,000  | ,000  | ,000  |
|                           | 403133109 | ,000             | ,000  | ,000  | ,000  |
|                           | 403133202 | ,000             | ,000  | ,000  | ,000  |
|                           | 403133203 | ,000             | ,000  | ,000  | ,000  |
|                           | 403133204 | ,000             | ,000  | ,000  | ,000  |
|                           | 403133315 | 1,000            | ,000  | ,000  | ,000  |
|                           | 403133322 | ,000             | 1,000 | ,000  | ,000  |
|                           | 403133401 | ,000             | ,000  | 1,000 | ,000  |
|                           | 403133402 | ,000             | ,000  | ,000  | 1,000 |
|                           | 403133550 | ,000             | ,000  | ,000  | ,000  |
|                           | 403133772 | ,000             | ,000  | ,000  | ,000  |
|                           | 403135803 | ,000             | ,000  | ,000  | ,000  |
|                           | 404060001 | ,000             | ,000  | ,000  | ,000  |
|                           | 404060002 | ,000             | ,000  | ,000  | ,000  |
|                           | 404310003 | ,000             | ,000  | ,000  | ,000  |
|                           | 404310004 | ,000             | ,000  | ,000  | ,000  |

## Categorical Variables Codings

|                           |           | Parameter coding |       |       |       |
|---------------------------|-----------|------------------|-------|-------|-------|
|                           |           | (20)             | (21)  | (22)  | (23)  |
| VASTY2 (SAIR*10000)+VASTY | 403073101 | ,000             | ,000  | ,000  | ,000  |
|                           | 403073102 | ,000             | ,000  | ,000  | ,000  |
|                           | 403073103 | ,000             | ,000  | ,000  | ,000  |
|                           | 403073202 | ,000             | ,000  | ,000  | ,000  |
|                           | 403073203 | ,000             | ,000  | ,000  | ,000  |
|                           | 403073204 | ,000             | ,000  | ,000  | ,000  |
|                           | 403073303 | ,000             | ,000  | ,000  | ,000  |
|                           | 403073651 | ,000             | ,000  | ,000  | ,000  |
|                           | 403073771 | ,000             | ,000  | ,000  | ,000  |
|                           | 403133102 | ,000             | ,000  | ,000  | ,000  |
|                           | 403133106 | ,000             | ,000  | ,000  | ,000  |
|                           | 403133107 | ,000             | ,000  | ,000  | ,000  |
|                           | 403133109 | ,000             | ,000  | ,000  | ,000  |
|                           | 403133202 | ,000             | ,000  | ,000  | ,000  |
|                           | 403133203 | ,000             | ,000  | ,000  | ,000  |
|                           | 403133204 | ,000             | ,000  | ,000  | ,000  |
|                           | 403133315 | ,000             | ,000  | ,000  | ,000  |
|                           | 403133322 | ,000             | ,000  | ,000  | ,000  |
|                           | 403133401 | ,000             | ,000  | ,000  | ,000  |
|                           | 403133402 | ,000             | ,000  | ,000  | ,000  |
|                           | 403133550 | 1,000            | ,000  | ,000  | ,000  |
|                           | 403133772 | ,000             | 1,000 | ,000  | ,000  |
|                           | 403135803 | ,000             | ,000  | 1,000 | ,000  |
|                           | 404060001 | ,000             | ,000  | ,000  | 1,000 |
|                           | 404060002 | ,000             | ,000  | ,000  | ,000  |
|                           | 404310003 | ,000             | ,000  | ,000  | ,000  |
|                           | 404310004 | ,000             | ,000  | ,000  | ,000  |

## Categorical Variables Codings

|                           |           | Parameter coding |       |       |      |
|---------------------------|-----------|------------------|-------|-------|------|
|                           |           | (24)             | (25)  | (26)  | (27) |
| VASTY2 (SAIR*10000)+VASTY | 403073101 | ,000             | ,000  | ,000  | ,000 |
|                           | 403073102 | ,000             | ,000  | ,000  | ,000 |
|                           | 403073103 | ,000             | ,000  | ,000  | ,000 |
|                           | 403073202 | ,000             | ,000  | ,000  | ,000 |
|                           | 403073203 | ,000             | ,000  | ,000  | ,000 |
|                           | 403073204 | ,000             | ,000  | ,000  | ,000 |
|                           | 403073303 | ,000             | ,000  | ,000  | ,000 |
|                           | 403073651 | ,000             | ,000  | ,000  | ,000 |
|                           | 403073771 | ,000             | ,000  | ,000  | ,000 |
|                           | 403133102 | ,000             | ,000  | ,000  | ,000 |
|                           | 403133106 | ,000             | ,000  | ,000  | ,000 |
|                           | 403133107 | ,000             | ,000  | ,000  | ,000 |
|                           | 403133109 | ,000             | ,000  | ,000  | ,000 |
|                           | 403133202 | ,000             | ,000  | ,000  | ,000 |
|                           | 403133203 | ,000             | ,000  | ,000  | ,000 |
|                           | 403133204 | ,000             | ,000  | ,000  | ,000 |
|                           | 403133315 | ,000             | ,000  | ,000  | ,000 |
|                           | 403133322 | ,000             | ,000  | ,000  | ,000 |
|                           | 403133401 | ,000             | ,000  | ,000  | ,000 |
|                           | 403133402 | ,000             | ,000  | ,000  | ,000 |
|                           | 403133550 | ,000             | ,000  | ,000  | ,000 |
|                           | 403133772 | ,000             | ,000  | ,000  | ,000 |
|                           | 403135803 | ,000             | ,000  | ,000  | ,000 |
|                           | 404060001 | ,000             | ,000  | ,000  | ,000 |
|                           | 404060002 | 1,000            | ,000  | ,000  | ,000 |
|                           | 404310003 | ,000             | 1,000 | ,000  | ,000 |
|                           | 404310004 | ,000             | ,000  | 1,000 | ,000 |



## Categorical Variables Codings

|                           |           | Parameter coding |      |      |      |
|---------------------------|-----------|------------------|------|------|------|
|                           |           | (28)             | (29) | (30) | (31) |
| VASTY2 (SAIR*10000)+VASTY | 403073101 | ,000             | ,000 | ,000 | ,000 |
|                           | 403073102 | ,000             | ,000 | ,000 | ,000 |
|                           | 403073103 | ,000             | ,000 | ,000 | ,000 |
|                           | 403073202 | ,000             | ,000 | ,000 | ,000 |
|                           | 403073203 | ,000             | ,000 | ,000 | ,000 |
|                           | 403073204 | ,000             | ,000 | ,000 | ,000 |
|                           | 403073303 | ,000             | ,000 | ,000 | ,000 |
|                           | 403073651 | ,000             | ,000 | ,000 | ,000 |
|                           | 403073771 | ,000             | ,000 | ,000 | ,000 |
|                           | 403133102 | ,000             | ,000 | ,000 | ,000 |
|                           | 403133106 | ,000             | ,000 | ,000 | ,000 |
|                           | 403133107 | ,000             | ,000 | ,000 | ,000 |
|                           | 403133109 | ,000             | ,000 | ,000 | ,000 |
|                           | 403133202 | ,000             | ,000 | ,000 | ,000 |
|                           | 403133203 | ,000             | ,000 | ,000 | ,000 |
|                           | 403133204 | ,000             | ,000 | ,000 | ,000 |
|                           | 403133315 | ,000             | ,000 | ,000 | ,000 |
|                           | 403133322 | ,000             | ,000 | ,000 | ,000 |
|                           | 403133401 | ,000             | ,000 | ,000 | ,000 |
|                           | 403133402 | ,000             | ,000 | ,000 | ,000 |
|                           | 403133550 | ,000             | ,000 | ,000 | ,000 |
|                           | 403133772 | ,000             | ,000 | ,000 | ,000 |
|                           | 403135803 | ,000             | ,000 | ,000 | ,000 |
|                           | 404060001 | ,000             | ,000 | ,000 | ,000 |
|                           | 404060002 | ,000             | ,000 | ,000 | ,000 |
|                           | 404310003 | ,000             | ,000 | ,000 | ,000 |
|                           | 404310004 | ,000             | ,000 | ,000 | ,000 |

## Categorical Variables Codings

|                           |           | Parameter coding |      |      |      |
|---------------------------|-----------|------------------|------|------|------|
|                           |           | (32)             | (33) | (34) | (35) |
| VASTY2 (SAIR*10000)+VASTY | 403073101 | ,000             | ,000 | ,000 | ,000 |
|                           | 403073102 | ,000             | ,000 | ,000 | ,000 |
|                           | 403073103 | ,000             | ,000 | ,000 | ,000 |
|                           | 403073202 | ,000             | ,000 | ,000 | ,000 |
|                           | 403073203 | ,000             | ,000 | ,000 | ,000 |
|                           | 403073204 | ,000             | ,000 | ,000 | ,000 |
|                           | 403073303 | ,000             | ,000 | ,000 | ,000 |
|                           | 403073651 | ,000             | ,000 | ,000 | ,000 |
|                           | 403073771 | ,000             | ,000 | ,000 | ,000 |
|                           | 403133102 | ,000             | ,000 | ,000 | ,000 |
|                           | 403133106 | ,000             | ,000 | ,000 | ,000 |
|                           | 403133107 | ,000             | ,000 | ,000 | ,000 |
|                           | 403133109 | ,000             | ,000 | ,000 | ,000 |
|                           | 403133202 | ,000             | ,000 | ,000 | ,000 |
|                           | 403133203 | ,000             | ,000 | ,000 | ,000 |
|                           | 403133204 | ,000             | ,000 | ,000 | ,000 |
|                           | 403133315 | ,000             | ,000 | ,000 | ,000 |
|                           | 403133322 | ,000             | ,000 | ,000 | ,000 |
|                           | 403133401 | ,000             | ,000 | ,000 | ,000 |
|                           | 403133402 | ,000             | ,000 | ,000 | ,000 |
|                           | 403133550 | ,000             | ,000 | ,000 | ,000 |
|                           | 403133772 | ,000             | ,000 | ,000 | ,000 |
|                           | 403135803 | ,000             | ,000 | ,000 | ,000 |
|                           | 404060001 | ,000             | ,000 | ,000 | ,000 |
|                           | 404060002 | ,000             | ,000 | ,000 | ,000 |
|                           | 404310003 | ,000             | ,000 | ,000 | ,000 |
|                           | 404310004 | ,000             | ,000 | ,000 | ,000 |

## Categorical Variables Codings

|                              | Frequency | Parameter coding |       |       |
|------------------------------|-----------|------------------|-------|-------|
|                              |           | (1)              | (2)   | (3)   |
| 502300005                    | 366       | ,000             | ,000  | ,000  |
| 502300006                    | 225       | ,000             | ,000  | ,000  |
| 502300007                    | 366       | ,000             | ,000  | ,000  |
| 502300214                    | 366       | ,000             | ,000  | ,000  |
| 502300411                    | 366       | ,000             | ,000  | ,000  |
| 502300415                    | 360       | ,000             | ,000  | ,000  |
| 502300416                    | 363       | ,000             | ,000  | ,000  |
| 502300811                    | 364       | ,000             | ,000  | ,000  |
| 502300913                    | 315       | ,000             | ,000  | ,000  |
| sv7 sjättedelar för standard |           |                  |       |       |
| 1 fjärde sjundedelen         | 1423      | ,000             | ,000  | ,000  |
| 2 första sjundedelen         | 3031      | 1,000            | ,000  | ,000  |
| 3 andra sjundedelen          | 1238      | ,000             | 1,000 | ,000  |
| 4 tredje sjundedelen         | 1255      | ,000             | ,000  | 1,000 |
| 5 femte sjundedelen          | 1445      | ,000             | ,000  | ,000  |
| 6 sjätte sjundedelen         | 1948      | ,000             | ,000  | ,000  |
| 7 sjunde sjundedelen         | 2135      | ,000             | ,000  | ,000  |

## Categorical Variables Codings

|                              |  | Parameter coding |       |       |      |
|------------------------------|--|------------------|-------|-------|------|
|                              |  | (4)              | (5)   | (6)   | (7)  |
| 502300005                    |  | ,000             | ,000  | ,000  | ,000 |
| 502300006                    |  | ,000             | ,000  | ,000  | ,000 |
| 502300007                    |  | ,000             | ,000  | ,000  | ,000 |
| 502300214                    |  | ,000             | ,000  | ,000  | ,000 |
| 502300411                    |  | ,000             | ,000  | ,000  | ,000 |
| 502300415                    |  | ,000             | ,000  | ,000  | ,000 |
| 502300416                    |  | ,000             | ,000  | ,000  | ,000 |
| 502300811                    |  | ,000             | ,000  | ,000  | ,000 |
| 502300913                    |  | ,000             | ,000  | ,000  | ,000 |
| sv7 sjättedelar för standard |  |                  |       |       |      |
| 1 fjärde sjundedelen         |  | ,000             | ,000  | ,000  |      |
| 2 första sjundedelen         |  | ,000             | ,000  | ,000  |      |
| 3 andra sjundedelen          |  | ,000             | ,000  | ,000  |      |
| 4 tredje sjundedelen         |  | ,000             | ,000  | ,000  |      |
| 5 femte sjundedelen          |  | 1,000            | ,000  | ,000  |      |
| 6 sjätte sjundedelen         |  | ,000             | 1,000 | ,000  |      |
| 7 sjunde sjundedelen         |  | ,000             | ,000  | 1,000 |      |

## Categorical Variables Codings

|                              |                      | Parameter coding |      |      |      |
|------------------------------|----------------------|------------------|------|------|------|
|                              |                      | (8)              | (9)  | (10) | (11) |
|                              | 502300005            | ,000             | ,000 | ,000 | ,000 |
|                              | 502300006            | ,000             | ,000 | ,000 | ,000 |
|                              | 502300007            | ,000             | ,000 | ,000 | ,000 |
|                              | 502300214            | ,000             | ,000 | ,000 | ,000 |
|                              | 502300411            | ,000             | ,000 | ,000 | ,000 |
|                              | 502300415            | ,000             | ,000 | ,000 | ,000 |
|                              | 502300416            | ,000             | ,000 | ,000 | ,000 |
|                              | 502300811            | ,000             | ,000 | ,000 | ,000 |
|                              | 502300913            | ,000             | ,000 | ,000 | ,000 |
| sv7 sjättedelar för standard | 1 fjärde sjundedelen |                  |      |      |      |
|                              | 2 första sjundedelen |                  |      |      |      |
|                              | 3 andra sjundedelen  |                  |      |      |      |
|                              | 4 tredje sjundedelen |                  |      |      |      |
|                              | 5 femte sjundedelen  |                  |      |      |      |
|                              | 6 sjätte sjundedelen |                  |      |      |      |
|                              | 7 sjunde sjundedelen |                  |      |      |      |

## Categorical Variables Codings

|                              |                      | Parameter coding |      |      |      |
|------------------------------|----------------------|------------------|------|------|------|
|                              |                      | (12)             | (13) | (14) | (15) |
|                              | 502300005            | ,000             | ,000 | ,000 | ,000 |
|                              | 502300006            | ,000             | ,000 | ,000 | ,000 |
|                              | 502300007            | ,000             | ,000 | ,000 | ,000 |
|                              | 502300214            | ,000             | ,000 | ,000 | ,000 |
|                              | 502300411            | ,000             | ,000 | ,000 | ,000 |
|                              | 502300415            | ,000             | ,000 | ,000 | ,000 |
|                              | 502300416            | ,000             | ,000 | ,000 | ,000 |
|                              | 502300811            | ,000             | ,000 | ,000 | ,000 |
|                              | 502300913            | ,000             | ,000 | ,000 | ,000 |
| sv7 sjättedelar för standard | 1 fjärde sjundedelen |                  |      |      |      |
|                              | 2 första sjundedelen |                  |      |      |      |
|                              | 3 andra sjundedelen  |                  |      |      |      |
|                              | 4 tredje sjundedelen |                  |      |      |      |
|                              | 5 femte sjundedelen  |                  |      |      |      |
|                              | 6 sjätte sjundedelen |                  |      |      |      |
|                              | 7 sjunde sjundedelen |                  |      |      |      |

## Categorical Variables Codings

|                              |                      | Parameter coding |      |      |      |
|------------------------------|----------------------|------------------|------|------|------|
|                              |                      | (16)             | (17) | (18) | (19) |
|                              | 502300005            | ,000             | ,000 | ,000 | ,000 |
|                              | 502300006            | ,000             | ,000 | ,000 | ,000 |
|                              | 502300007            | ,000             | ,000 | ,000 | ,000 |
|                              | 502300214            | ,000             | ,000 | ,000 | ,000 |
|                              | 502300411            | ,000             | ,000 | ,000 | ,000 |
|                              | 502300415            | ,000             | ,000 | ,000 | ,000 |
|                              | 502300416            | ,000             | ,000 | ,000 | ,000 |
|                              | 502300811            | ,000             | ,000 | ,000 | ,000 |
|                              | 502300913            | ,000             | ,000 | ,000 | ,000 |
| sv7 sjättedelar för standard | 1 fjärde sjundedelen |                  |      |      |      |
|                              | 2 första sjundedelen |                  |      |      |      |
|                              | 3 andra sjundedelen  |                  |      |      |      |
|                              | 4 tredje sjundedelen |                  |      |      |      |
|                              | 5 femte sjundedelen  |                  |      |      |      |
|                              | 6 sjätte sjundedelen |                  |      |      |      |
|                              | 7 sjunde sjundedelen |                  |      |      |      |

## Categorical Variables Codings

|                              |                      | Parameter coding |      |      |      |
|------------------------------|----------------------|------------------|------|------|------|
|                              |                      | (20)             | (21) | (22) | (23) |
|                              | 502300005            | ,000             | ,000 | ,000 | ,000 |
|                              | 502300006            | ,000             | ,000 | ,000 | ,000 |
|                              | 502300007            | ,000             | ,000 | ,000 | ,000 |
|                              | 502300214            | ,000             | ,000 | ,000 | ,000 |
|                              | 502300411            | ,000             | ,000 | ,000 | ,000 |
|                              | 502300415            | ,000             | ,000 | ,000 | ,000 |
|                              | 502300416            | ,000             | ,000 | ,000 | ,000 |
|                              | 502300811            | ,000             | ,000 | ,000 | ,000 |
|                              | 502300913            | ,000             | ,000 | ,000 | ,000 |
| sv7 sjättedelar för standard | 1 fjärde sjundedelen |                  |      |      |      |
|                              | 2 första sjundedelen |                  |      |      |      |
|                              | 3 andra sjundedelen  |                  |      |      |      |
|                              | 4 tredje sjundedelen |                  |      |      |      |
|                              | 5 femte sjundedelen  |                  |      |      |      |
|                              | 6 sjätte sjundedelen |                  |      |      |      |
|                              | 7 sjunde sjundedelen |                  |      |      |      |

## Categorical Variables Codings

|                              |                      | Parameter coding |      |      |       |
|------------------------------|----------------------|------------------|------|------|-------|
|                              |                      | (24)             | (25) | (26) | (27)  |
|                              | 502300005            | ,000             | ,000 | ,000 | 1,000 |
|                              | 502300006            | ,000             | ,000 | ,000 | ,000  |
|                              | 502300007            | ,000             | ,000 | ,000 | ,000  |
|                              | 502300214            | ,000             | ,000 | ,000 | ,000  |
|                              | 502300411            | ,000             | ,000 | ,000 | ,000  |
|                              | 502300415            | ,000             | ,000 | ,000 | ,000  |
|                              | 502300416            | ,000             | ,000 | ,000 | ,000  |
|                              | 502300811            | ,000             | ,000 | ,000 | ,000  |
|                              | 502300913            | ,000             | ,000 | ,000 | ,000  |
| sv7 sjättedelar för standard | 1 fjärde sjundedelen |                  |      |      |       |
|                              | 2 första sjundedelen |                  |      |      |       |
|                              | 3 andra sjundedelen  |                  |      |      |       |
|                              | 4 tredje sjundedelen |                  |      |      |       |
|                              | 5 femte sjundedelen  |                  |      |      |       |
|                              | 6 sjätte sjundedelen |                  |      |      |       |
|                              | 7 sjunde sjundedelen |                  |      |      |       |

## Categorical Variables Codings

|                              |                      | Parameter coding |       |       |       |
|------------------------------|----------------------|------------------|-------|-------|-------|
|                              |                      | (28)             | (29)  | (30)  | (31)  |
|                              | 502300005            | ,000             | ,000  | ,000  | ,000  |
|                              | 502300006            | 1,000            | ,000  | ,000  | ,000  |
|                              | 502300007            | ,000             | 1,000 | ,000  | ,000  |
|                              | 502300214            | ,000             | ,000  | 1,000 | ,000  |
|                              | 502300411            | ,000             | ,000  | ,000  | 1,000 |
|                              | 502300415            | ,000             | ,000  | ,000  | ,000  |
|                              | 502300416            | ,000             | ,000  | ,000  | ,000  |
|                              | 502300811            | ,000             | ,000  | ,000  | ,000  |
|                              | 502300913            | ,000             | ,000  | ,000  | ,000  |
| sv7 sjättedelar för standard | 1 fjärde sjundedelen |                  |       |       |       |
|                              | 2 första sjundedelen |                  |       |       |       |
|                              | 3 andra sjundedelen  |                  |       |       |       |
|                              | 4 tredje sjundedelen |                  |       |       |       |
|                              | 5 femte sjundedelen  |                  |       |       |       |
|                              | 6 sjätte sjundedelen |                  |       |       |       |
|                              | 7 sjunde sjundedelen |                  |       |       |       |

**Categorical Variables Codings**

|                              |                      | Parameter coding |       |       |       |
|------------------------------|----------------------|------------------|-------|-------|-------|
|                              |                      | (32)             | (33)  | (34)  | (35)  |
|                              | 502300005            | ,000             | ,000  | ,000  | ,000  |
|                              | 502300006            | ,000             | ,000  | ,000  | ,000  |
|                              | 502300007            | ,000             | ,000  | ,000  | ,000  |
|                              | 502300214            | ,000             | ,000  | ,000  | ,000  |
|                              | 502300411            | ,000             | ,000  | ,000  | ,000  |
|                              | 502300415            | 1,000            | ,000  | ,000  | ,000  |
|                              | 502300416            | ,000             | 1,000 | ,000  | ,000  |
|                              | 502300811            | ,000             | ,000  | 1,000 | ,000  |
|                              | 502300913            | ,000             | ,000  | ,000  | 1,000 |
| sv7 sjättedelar för standard | 1 fjärde sjundedelen |                  |       |       |       |
|                              | 2 första sjundedelen |                  |       |       |       |
|                              | 3 andra sjundedelen  |                  |       |       |       |
|                              | 4 tredje sjundedelen |                  |       |       |       |
|                              | 5 femte sjundedelen  |                  |       |       |       |
|                              | 6 sjätte sjundedelen |                  |       |       |       |
|                              | 7 sjunde sjundedelen |                  |       |       |       |

**Block 0: Beginning Block**

**Classification Table<sup>a,b</sup>**

| Observed           |                                                   |                                                              |
|--------------------|---------------------------------------------------|--------------------------------------------------------------|
| Step 0             | seuraust3 seuraus highest = haitta (i någon form) | 0 ingen händelse eller ei haittaa<br>1 haitta (i någon form) |
| Overall Percentage |                                                   |                                                              |

**Classification Table<sup>a,b</sup>**

| Observed           |                                                   | Predicted                 |                                   |
|--------------------|---------------------------------------------------|---------------------------|-----------------------------------|
|                    |                                                   | seuraust3 seuraus highest | 0 ingen händelse eller ei haittaa |
| Step 0             | seuraust3 seuraus highest = haitta (i någon form) | 12075                     | 400                               |
| Overall Percentage |                                                   |                           |                                   |

Classification Table<sup>a,b</sup>

| Observed           |                                                   |                                   | Predicted                       |                            |
|--------------------|---------------------------------------------------|-----------------------------------|---------------------------------|----------------------------|
|                    |                                                   |                                   | seuraust3<br>seuraus highest .. | 1 haitta (i<br>någon form) |
| Step 0             | seuraust3 seuraus highest = haitta (i någon form) | 0 ingen händelse eller ei haittaa | 0                               |                            |
|                    |                                                   | 1 haitta (i någon form)           | 0                               |                            |
| Overall Percentage |                                                   |                                   |                                 |                            |

Classification Table<sup>a,b</sup>

| Observed           |                                                   |                                   | Predicted          |  |
|--------------------|---------------------------------------------------|-----------------------------------|--------------------|--|
|                    |                                                   |                                   | Percentage Correct |  |
| Step 0             | seuraust3 seuraus highest = haitta (i någon form) | 0 ingen händelse eller ei haittaa | 100,0              |  |
|                    |                                                   | 1 haitta (i någon form)           | ,0                 |  |
| Overall Percentage |                                                   |                                   | 96,8               |  |

a. Constant is included in the model.

b. The cut value is ,500

Variables in the Equation

|                 | B      | S.E. | Wald     | df | Sig. | Exp(B) |
|-----------------|--------|------|----------|----|------|--------|
| Step 0 Constant | -3,407 | ,051 | 4495,313 | 1  | ,000 | ,033   |



## Variables not in the Equation

|        |           |            | Score   | df | Sig. |
|--------|-----------|------------|---------|----|------|
| Step 0 | Variables | sv7        | 16,156  | 6  | ,013 |
|        |           | sv7(1)     | 7,549   | 1  | ,006 |
|        |           | sv7(2)     | 2,716   | 1  | ,099 |
|        |           | sv7(3)     | ,300    | 1  | ,584 |
|        |           | sv7(4)     | 1,121   | 1  | ,290 |
|        |           | sv7(5)     | 3,082   | 1  | ,079 |
|        |           | sv7(6)     | 4,983   | 1  | ,026 |
|        |           | VASTY2     | 321,056 | 35 | ,000 |
|        |           | VASTY2(1)  | 1,769   | 1  | ,184 |
|        |           | VASTY2(2)  | 27,206  | 1  | ,000 |
|        |           | VASTY2(3)  | 8,562   | 1  | ,003 |
|        |           | VASTY2(4)  | ,988    | 1  | ,320 |
|        |           | VASTY2(5)  | ,587    | 1  | ,444 |
|        |           | VASTY2(6)  | 8,528   | 1  | ,003 |
|        |           | VASTY2(7)  | 2,666   | 1  | ,103 |
|        |           | VASTY2(8)  | ,008    | 1  | ,929 |
|        |           | VASTY2(9)  | 19,221  | 1  | ,000 |
|        |           | VASTY2(10) | 58,192  | 1  | ,000 |
|        |           | VASTY2(11) | 21,278  | 1  | ,000 |
|        |           | VASTY2(12) | 2,551   | 1  | ,110 |
|        |           | VASTY2(13) | 62,883  | 1  | ,000 |
|        |           | VASTY2(14) | ,045    | 1  | ,832 |
|        |           | VASTY2(15) | 8,562   | 1  | ,003 |
|        |           | VASTY2(16) | 1,322   | 1  | ,250 |
|        |           | VASTY2(17) | 2,012   | 1  | ,156 |
|        |           | VASTY2(18) | 6,791   | 1  | ,009 |
|        |           | VASTY2(19) | 10,418  | 1  | ,001 |
|        |           | VASTY2(20) | ,662    | 1  | ,416 |
|        |           | VASTY2(21) | 8,562   | 1  | ,003 |
|        |           | VASTY2(22) | 5,396   | 1  | ,020 |
|        |           | VASTY2(23) | ,045    | 1  | ,832 |
|        |           | VASTY2(24) | 5,427   | 1  | ,020 |
|        |           | VASTY2(25) | 6,092   | 1  | ,014 |
|        |           | VASTY2(26) | 7,868   | 1  | ,005 |
|        |           | VASTY2(27) | 5,427   | 1  | ,020 |
|        |           | VASTY2(28) | ,715    | 1  | ,398 |
|        |           | VASTY2(29) | 2,983   | 1  | ,084 |
|        |           | VASTY2(30) | 2,034   | 1  | ,154 |
|        |           | VASTY2(31) | 30,255  | 1  | ,000 |
|        |           | VASTY2(32) | 1,902   | 1  | ,168 |
|        |           | VASTY2(33) | 1,968   | 1  | ,161 |
|        |           | VASTY2(34) | 6,856   | 1  | ,009 |
|        |           | VASTY2(35) | ,127    | 1  | ,722 |

## Variables not in the Equation

|                    | Score   | df | Sig. |
|--------------------|---------|----|------|
| Overall Statistics | 324,930 | 41 | ,000 |

## Block 1: Method = Enter

## Omnibus Tests of Model Coefficients

|             | Chi-square | df | Sig. |
|-------------|------------|----|------|
| Step 1 Step | 299,651    | 41 | ,000 |
| Block       | 299,651    | 41 | ,000 |
| Model       | 299,651    | 41 | ,000 |

## Model Summary

| Step | -2 Log likelihood     | Cox & Snell R Square | Nagelkerke R Square |
|------|-----------------------|----------------------|---------------------|
| 1    | 3239,398 <sup>a</sup> | ,024                 | ,096                |

a. Estimation terminated at iteration number 9 because parameter estimates changed by less than ,001.

Classification Table<sup>a</sup>

| Observed           |                                                    |                                                              |
|--------------------|----------------------------------------------------|--------------------------------------------------------------|
| Step 1             | seorauslt3 seoraus highest = haitta (i någon form) | 0 ingen händelse eller ei haittaa<br>1 haitta (i någon form) |
| Overall Percentage |                                                    |                                                              |

Classification Table<sup>a</sup>

|                    |                                                    |                                                              | Predicted                         |
|--------------------|----------------------------------------------------|--------------------------------------------------------------|-----------------------------------|
|                    |                                                    |                                                              | seorauslt3 seoraus highest        |
|                    |                                                    |                                                              | 0 ingen händelse eller ei haittaa |
| Step 1             | seorauslt3 seoraus highest = haitta (i någon form) | 0 ingen händelse eller ei haittaa<br>1 haitta (i någon form) | 12075<br>400                      |
| Overall Percentage |                                                    |                                                              |                                   |

Classification Table<sup>a</sup>

| Observed           |                                                    | Predicted                         |                         |
|--------------------|----------------------------------------------------|-----------------------------------|-------------------------|
|                    |                                                    | seorauslt3 seoraus highest ..     | 1 haitta (i någon form) |
| Step 1             | seorauslt3 seoraus highest = haitta (i någon form) | 0 ingen händelse eller ei haittaa | 0                       |
|                    |                                                    | 1 haitta (i någon form)           | 0                       |
| Overall Percentage |                                                    |                                   |                         |

Classification Table<sup>a</sup>

| Observed           |                                                    | Predicted                         |       |
|--------------------|----------------------------------------------------|-----------------------------------|-------|
|                    |                                                    | Percentage Correct                |       |
| Step 1             | seorauslt3 seoraus highest = haitta (i någon form) | 0 ingen händelse eller ei haittaa | 100,0 |
|                    |                                                    | 1 haitta (i någon form)           | ,0    |
| Overall Percentage |                                                    |                                   | 96,8  |

a. The cut value is ,500

Variables in the Equation

|                         | B      | S.E. | Wald    | df | Sig. | Exp(B) |
|-------------------------|--------|------|---------|----|------|--------|
| Step 1 <sup>a</sup> sv7 |        |      | 3,796   | 6  | ,704 |        |
| sv7(1)                  | -,122  | ,221 | ,304    | 1  | ,581 | ,885   |
| sv7(2)                  | -,210  | ,243 | ,746    | 1  | ,388 | ,810   |
| sv7(3)                  | -,007  | ,228 | ,001    | 1  | ,975 | ,993   |
| sv7(4)                  | ,145   | ,209 | ,481    | 1  | ,488 | 1,156  |
| sv7(5)                  | -,028  | ,201 | ,020    | 1  | ,889 | ,972   |
| sv7(6)                  | ,174   | ,219 | ,633    | 1  | ,426 | 1,190  |
| VASTY2                  |        |      | 218,650 | 35 | ,000 |        |
| VASTY2(1)               | ,598   | ,425 | 1,974   | 1  | ,160 | 1,818  |
| VASTY2(2)               | 1,156  | ,398 | 8,426   | 1  | ,004 | 3,179  |
| VASTY2(3)               | -1,493 | ,786 | 3,609   | 1  | ,057 | ,225   |
| VASTY2(4)               | ,571   | ,429 | 1,766   | 1  | ,184 | 1,769  |
| VASTY2(5)               | ,551   | ,444 | 1,539   | 1  | ,215 | 1,734  |
| VASTY2(6)               | -1,653 | ,797 | 4,307   | 1  | ,038 | ,191   |
| VASTY2(7)               | ,680   | ,420 | 2,625   | 1  | ,105 | 1,973  |
| VASTY2(8)               | ,342   | ,449 | ,578    | 1  | ,447 | 1,407  |
| VASTY2(9)               | 1,153  | ,397 | 8,446   | 1  | ,004 | 3,167  |
| VASTY2(10)              | 1,408  | ,393 | 12,857  | 1  | ,000 | 4,087  |
| VASTY2(11)              | 1,169  | ,393 | 8,848   | 1  | ,003 | 3,220  |
| VASTY2(12)              | ,599   | ,424 | 1,993   | 1  | ,158 | 1,820  |

## Variables in the Equation

|                     |            | 95% C.I. for EXP(B) |       |
|---------------------|------------|---------------------|-------|
|                     |            | Lower               | Upper |
| Step 1 <sup>a</sup> | sv7        |                     |       |
|                     | sv7(1)     | ,575                | 1,365 |
|                     | sv7(2)     | ,503                | 1,306 |
|                     | sv7(3)     | ,635                | 1,553 |
|                     | sv7(4)     | ,768                | 1,741 |
|                     | sv7(5)     | ,655                | 1,442 |
|                     | sv7(6)     | ,775                | 1,829 |
|                     | VASTY2     |                     |       |
|                     | VASTY2(1)  | ,790                | 4,184 |
|                     | VASTY2(2)  | 1,456               | 6,940 |
|                     | VASTY2(3)  | ,048                | 1,049 |
|                     | VASTY2(4)  | ,763                | 4,104 |
|                     | VASTY2(5)  | ,727                | 4,140 |
|                     | VASTY2(6)  | ,040                | ,912  |
|                     | VASTY2(7)  | ,867                | 4,490 |
|                     | VASTY2(8)  | ,583                | 3,396 |
|                     | VASTY2(9)  | 1,455               | 6,891 |
|                     | VASTY2(10) | 1,893               | 8,824 |
|                     | VASTY2(11) | 1,490               | 6,958 |
|                     | VASTY2(12) | ,793                | 4,181 |

review only

## Variables in the Equation

|            | B      | S.E.  | Wald    | df | Sig. | Exp(B) |
|------------|--------|-------|---------|----|------|--------|
| VASTY2(13) | 1,428  | ,393  | 13,212  | 1  | ,000 | 4,170  |
| VASTY2(14) | ,162   | ,460  | ,124    | 1  | ,724 | 1,176  |
| VASTY2(15) | -1,594 | ,790  | 4,072   | 1  | ,044 | ,203   |
| VASTY2(16) | -,401  | ,676  | ,352    | 1  | ,553 | ,670   |
| VASTY2(17) | -,208  | ,511  | ,166    | 1  | ,684 | ,812   |
| VASTY2(18) | -,988  | ,687  | 2,069   | 1  | ,150 | ,372   |
| VASTY2(19) | -2,101 | 1,068 | 3,865   | 1  | ,049 | ,122   |
| VASTY2(20) | ,452   | ,454  | ,992    | 1  | ,319 | 1,571  |
| VASTY2(21) | -1,492 | ,786  | 3,607   | 1  | ,058 | ,225   |
| VASTY2(22) | -,822  | ,606  | 1,841   | 1  | ,175 | ,440   |
| VASTY2(23) | ,233   | ,456  | ,262    | 1  | ,609 | 1,263  |
| VASTY2(24) | -,857  | ,607  | 1,996   | 1  | ,158 | ,424   |
| VASTY2(25) | -1,242 | ,787  | 2,490   | 1  | ,115 | ,289   |
| VASTY2(26) | -2,000 | 1,057 | 3,580   | 1  | ,058 | ,135   |
| VASTY2(27) | -,885  | ,611  | 2,100   | 1  | ,147 | ,413   |
| VASTY2(28) | -,270  | ,585  | ,213    | 1  | ,644 | ,763   |
| VASTY2(29) | -,588  | ,556  | 1,116   | 1  | ,291 | ,556   |
| VASTY2(30) | -,202  | ,511  | ,155    | 1  | ,693 | ,817   |
| VASTY2(31) | 1,376  | ,405  | 11,558  | 1  | ,001 | 3,957  |
| VASTY2(32) | -,123  | ,531  | ,054    | 1  | ,817 | ,884   |
| VASTY2(33) | -,133  | ,533  | ,062    | 1  | ,804 | ,876   |
| VASTY2(34) | -1,103 | ,671  | 2,701   | 1  | ,100 | ,332   |
| VASTY2(35) | ,154   | ,479  | ,104    | 1  | ,747 | 1,167  |
| Constant   | -3,675 | ,363  | 102,427 | 1  | ,000 | ,025   |

## Variables in the Equation

|            | 95% C.I. for EXP(B) |       |
|------------|---------------------|-------|
|            | Lower               | Upper |
| VASTY2(13) | 1,931               | 9,006 |
| VASTY2(14) | ,478                | 2,895 |
| VASTY2(15) | ,043                | ,955  |
| VASTY2(16) | ,178                | 2,517 |
| VASTY2(17) | ,298                | 2,212 |
| VASTY2(18) | ,097                | 1,431 |
| VASTY2(19) | ,015                | ,993  |
| VASTY2(20) | ,646                | 3,823 |
| VASTY2(21) | ,048                | 1,049 |
| VASTY2(22) | ,134                | 1,441 |
| VASTY2(23) | ,516                | 3,089 |
| VASTY2(24) | ,129                | 1,394 |
| VASTY2(25) | ,062                | 1,351 |
| VASTY2(26) | ,017                | 1,074 |
| VASTY2(27) | ,125                | 1,366 |
| VASTY2(28) | ,242                | 2,404 |
| VASTY2(29) | ,187                | 1,653 |
| VASTY2(30) | ,300                | 2,227 |
| VASTY2(31) | 1,791               | 8,747 |
| VASTY2(32) | ,312                | 2,503 |
| VASTY2(33) | ,308                | 2,492 |
| VASTY2(34) | ,089                | 1,237 |
| VASTY2(35) | ,456                | 2,987 |
| Constant   |                     |       |

a. Variable(s) entered on step 1: sv7, VASTY2.

\*\*

```
LOGISTIC REGRESSION VARIABLES handlt1
  /METHOD=ENTER bv1 VASTY2
  /CONTRAST (bv1)=Indicator(1)
  /CONTRAST (VASTY2)=Indicator(1)
  /PRINT=CI(95)
  /CRITERIA=PIN(0.05) POUT(0.10) ITERATE(20) CUT(0.5).
```

## Logistic Regression

[DataSet6] C:\cWordjan\Rafaela\_VCS\alla\_tillsammans\abo\_bjo\_vasa\_v1.sav

### Case Processing Summary

| Unweighted Cases <sup>a</sup> |                      | N     | Percent |
|-------------------------------|----------------------|-------|---------|
| Selected Cases                | Included in Analysis | 12475 | 100,0   |
|                               | Missing Cases        | 0     | ,0      |
|                               | Total                | 12475 | 100,0   |
| Unselected Cases              |                      | 0     | ,0      |
| Total                         |                      | 12475 | 100,0   |

a. If weight is in effect, see classification table for the total number of cases.

### Dependent Variable Encoding

| Original Value            | Internal Value |
|---------------------------|----------------|
| 0 ingen eller en händelse | 0              |
| 1 mer än en händelse      | 1              |

### Categorical Variables Codings

|                                     | Frequency | Parameter coding |       |       |
|-------------------------------------|-----------|------------------|-------|-------|
|                                     |           | (1)              | (2)   | (3)   |
| VASTY2 (SAIR*10000)+VASTY 403073101 | 365       | ,000             | ,000  | ,000  |
| 403073102                           | 362       | 1,000            | ,000  | ,000  |
| 403073103                           | 365       | ,000             | 1,000 | ,000  |
| 403073202                           | 365       | ,000             | ,000  | 1,000 |
| 403073203                           | 365       | ,000             | ,000  | ,000  |
| 403073204                           | 330       | ,000             | ,000  | ,000  |
| 403073303                           | 364       | ,000             | ,000  | ,000  |
| 403073651                           | 362       | ,000             | ,000  | ,000  |
| 403073771                           | 365       | ,000             | ,000  | ,000  |
| 403133102                           | 341       | ,000             | ,000  | ,000  |
| 403133106                           | 365       | ,000             | ,000  | ,000  |
| 403133107                           | 365       | ,000             | ,000  | ,000  |
| 403133109                           | 365       | ,000             | ,000  | ,000  |
| 403133202                           | 365       | ,000             | ,000  | ,000  |
| 403133203                           | 365       | ,000             | ,000  | ,000  |
| 403133204                           | 365       | ,000             | ,000  | ,000  |
| 403133315                           | 177       | ,000             | ,000  | ,000  |
| 403133322                           | 365       | ,000             | ,000  | ,000  |
| 403133401                           | 362       | ,000             | ,000  | ,000  |
| 403133402                           | 365       | ,000             | ,000  | ,000  |
| 403133550                           | 298       | ,000             | ,000  | ,000  |
| 403133772                           | 365       | ,000             | ,000  | ,000  |
| 403135803                           | 365       | ,000             | ,000  | ,000  |
| 404060001                           | 365       | ,000             | ,000  | ,000  |
| 404060002                           | 366       | ,000             | ,000  | ,000  |
| 404310003                           | 291       | ,000             | ,000  | ,000  |
| 404310004                           | 291       | ,000             | ,000  | ,000  |

## Categorical Variables Codings

|                           |           | Parameter coding |       |       |       |
|---------------------------|-----------|------------------|-------|-------|-------|
|                           |           | (4)              | (5)   | (6)   | (7)   |
| VASTY2 (SAIR*10000)+VASTY | 403073101 | ,000             | ,000  | ,000  | ,000  |
|                           | 403073102 | ,000             | ,000  | ,000  | ,000  |
|                           | 403073103 | ,000             | ,000  | ,000  | ,000  |
|                           | 403073202 | ,000             | ,000  | ,000  | ,000  |
|                           | 403073203 | 1,000            | ,000  | ,000  | ,000  |
|                           | 403073204 | ,000             | 1,000 | ,000  | ,000  |
|                           | 403073303 | ,000             | ,000  | 1,000 | ,000  |
|                           | 403073651 | ,000             | ,000  | ,000  | 1,000 |
|                           | 403073771 | ,000             | ,000  | ,000  | ,000  |
|                           | 403133102 | ,000             | ,000  | ,000  | ,000  |
|                           | 403133106 | ,000             | ,000  | ,000  | ,000  |
|                           | 403133107 | ,000             | ,000  | ,000  | ,000  |
|                           | 403133109 | ,000             | ,000  | ,000  | ,000  |
|                           | 403133202 | ,000             | ,000  | ,000  | ,000  |
|                           | 403133203 | ,000             | ,000  | ,000  | ,000  |
|                           | 403133204 | ,000             | ,000  | ,000  | ,000  |
|                           | 403133315 | ,000             | ,000  | ,000  | ,000  |
|                           | 403133322 | ,000             | ,000  | ,000  | ,000  |
|                           | 403133401 | ,000             | ,000  | ,000  | ,000  |
|                           | 403133402 | ,000             | ,000  | ,000  | ,000  |
|                           | 403133550 | ,000             | ,000  | ,000  | ,000  |
|                           | 403133772 | ,000             | ,000  | ,000  | ,000  |
|                           | 403135803 | ,000             | ,000  | ,000  | ,000  |
|                           | 404060001 | ,000             | ,000  | ,000  | ,000  |
|                           | 404060002 | ,000             | ,000  | ,000  | ,000  |
|                           | 404310003 | ,000             | ,000  | ,000  | ,000  |
|                           | 404310004 | ,000             | ,000  | ,000  | ,000  |



## Categorical Variables Codings

|                           |           | Parameter coding |       |       |       |
|---------------------------|-----------|------------------|-------|-------|-------|
|                           |           | (8)              | (9)   | (10)  | (11)  |
| VASTY2 (SAIR*10000)+VASTY | 403073101 | ,000             | ,000  | ,000  | ,000  |
|                           | 403073102 | ,000             | ,000  | ,000  | ,000  |
|                           | 403073103 | ,000             | ,000  | ,000  | ,000  |
|                           | 403073202 | ,000             | ,000  | ,000  | ,000  |
|                           | 403073203 | ,000             | ,000  | ,000  | ,000  |
|                           | 403073204 | ,000             | ,000  | ,000  | ,000  |
|                           | 403073303 | ,000             | ,000  | ,000  | ,000  |
|                           | 403073651 | ,000             | ,000  | ,000  | ,000  |
|                           | 403073771 | 1,000            | ,000  | ,000  | ,000  |
|                           | 403133102 | ,000             | 1,000 | ,000  | ,000  |
|                           | 403133106 | ,000             | ,000  | 1,000 | ,000  |
|                           | 403133107 | ,000             | ,000  | ,000  | 1,000 |
|                           | 403133109 | ,000             | ,000  | ,000  | ,000  |
|                           | 403133202 | ,000             | ,000  | ,000  | ,000  |
|                           | 403133203 | ,000             | ,000  | ,000  | ,000  |
|                           | 403133204 | ,000             | ,000  | ,000  | ,000  |
|                           | 403133315 | ,000             | ,000  | ,000  | ,000  |
|                           | 403133322 | ,000             | ,000  | ,000  | ,000  |
|                           | 403133401 | ,000             | ,000  | ,000  | ,000  |
|                           | 403133402 | ,000             | ,000  | ,000  | ,000  |
|                           | 403133550 | ,000             | ,000  | ,000  | ,000  |
|                           | 403133772 | ,000             | ,000  | ,000  | ,000  |
|                           | 403135803 | ,000             | ,000  | ,000  | ,000  |
|                           | 404060001 | ,000             | ,000  | ,000  | ,000  |
|                           | 404060002 | ,000             | ,000  | ,000  | ,000  |
|                           | 404310003 | ,000             | ,000  | ,000  | ,000  |
|                           | 404310004 | ,000             | ,000  | ,000  | ,000  |

## Categorical Variables Codings

|                           |           | Parameter coding |       |       |       |
|---------------------------|-----------|------------------|-------|-------|-------|
|                           |           | (12)             | (13)  | (14)  | (15)  |
| VASTY2 (SAIR*10000)+VASTY | 403073101 | ,000             | ,000  | ,000  | ,000  |
|                           | 403073102 | ,000             | ,000  | ,000  | ,000  |
|                           | 403073103 | ,000             | ,000  | ,000  | ,000  |
|                           | 403073202 | ,000             | ,000  | ,000  | ,000  |
|                           | 403073203 | ,000             | ,000  | ,000  | ,000  |
|                           | 403073204 | ,000             | ,000  | ,000  | ,000  |
|                           | 403073303 | ,000             | ,000  | ,000  | ,000  |
|                           | 403073651 | ,000             | ,000  | ,000  | ,000  |
|                           | 403073771 | ,000             | ,000  | ,000  | ,000  |
|                           | 403133102 | ,000             | ,000  | ,000  | ,000  |
|                           | 403133106 | ,000             | ,000  | ,000  | ,000  |
|                           | 403133107 | ,000             | ,000  | ,000  | ,000  |
|                           | 403133109 | 1,000            | ,000  | ,000  | ,000  |
|                           | 403133202 | ,000             | 1,000 | ,000  | ,000  |
|                           | 403133203 | ,000             | ,000  | 1,000 | ,000  |
|                           | 403133204 | ,000             | ,000  | ,000  | 1,000 |
|                           | 403133315 | ,000             | ,000  | ,000  | ,000  |
|                           | 403133322 | ,000             | ,000  | ,000  | ,000  |
|                           | 403133401 | ,000             | ,000  | ,000  | ,000  |
|                           | 403133402 | ,000             | ,000  | ,000  | ,000  |
|                           | 403133550 | ,000             | ,000  | ,000  | ,000  |
|                           | 403133772 | ,000             | ,000  | ,000  | ,000  |
|                           | 403135803 | ,000             | ,000  | ,000  | ,000  |
|                           | 404060001 | ,000             | ,000  | ,000  | ,000  |
|                           | 404060002 | ,000             | ,000  | ,000  | ,000  |
|                           | 404310003 | ,000             | ,000  | ,000  | ,000  |
|                           | 404310004 | ,000             | ,000  | ,000  | ,000  |

## Categorical Variables Codings

|                           |           | Parameter coding |       |       |       |
|---------------------------|-----------|------------------|-------|-------|-------|
|                           |           | (16)             | (17)  | (18)  | (19)  |
| VASTY2 (SAIR*10000)+VASTY | 403073101 | ,000             | ,000  | ,000  | ,000  |
|                           | 403073102 | ,000             | ,000  | ,000  | ,000  |
|                           | 403073103 | ,000             | ,000  | ,000  | ,000  |
|                           | 403073202 | ,000             | ,000  | ,000  | ,000  |
|                           | 403073203 | ,000             | ,000  | ,000  | ,000  |
|                           | 403073204 | ,000             | ,000  | ,000  | ,000  |
|                           | 403073303 | ,000             | ,000  | ,000  | ,000  |
|                           | 403073651 | ,000             | ,000  | ,000  | ,000  |
|                           | 403073771 | ,000             | ,000  | ,000  | ,000  |
|                           | 403133102 | ,000             | ,000  | ,000  | ,000  |
|                           | 403133106 | ,000             | ,000  | ,000  | ,000  |
|                           | 403133107 | ,000             | ,000  | ,000  | ,000  |
|                           | 403133109 | ,000             | ,000  | ,000  | ,000  |
|                           | 403133202 | ,000             | ,000  | ,000  | ,000  |
|                           | 403133203 | ,000             | ,000  | ,000  | ,000  |
|                           | 403133204 | ,000             | ,000  | ,000  | ,000  |
|                           | 403133315 | 1,000            | ,000  | ,000  | ,000  |
|                           | 403133322 | ,000             | 1,000 | ,000  | ,000  |
|                           | 403133401 | ,000             | ,000  | 1,000 | ,000  |
|                           | 403133402 | ,000             | ,000  | ,000  | 1,000 |
|                           | 403133550 | ,000             | ,000  | ,000  | ,000  |
|                           | 403133772 | ,000             | ,000  | ,000  | ,000  |
|                           | 403135803 | ,000             | ,000  | ,000  | ,000  |
|                           | 404060001 | ,000             | ,000  | ,000  | ,000  |
|                           | 404060002 | ,000             | ,000  | ,000  | ,000  |
|                           | 404310003 | ,000             | ,000  | ,000  | ,000  |
|                           | 404310004 | ,000             | ,000  | ,000  | ,000  |

## Categorical Variables Codings

|                           |           | Parameter coding |       |       |       |
|---------------------------|-----------|------------------|-------|-------|-------|
|                           |           | (20)             | (21)  | (22)  | (23)  |
| VASTY2 (SAIR*10000)+VASTY | 403073101 | ,000             | ,000  | ,000  | ,000  |
|                           | 403073102 | ,000             | ,000  | ,000  | ,000  |
|                           | 403073103 | ,000             | ,000  | ,000  | ,000  |
|                           | 403073202 | ,000             | ,000  | ,000  | ,000  |
|                           | 403073203 | ,000             | ,000  | ,000  | ,000  |
|                           | 403073204 | ,000             | ,000  | ,000  | ,000  |
|                           | 403073303 | ,000             | ,000  | ,000  | ,000  |
|                           | 403073651 | ,000             | ,000  | ,000  | ,000  |
|                           | 403073771 | ,000             | ,000  | ,000  | ,000  |
|                           | 403133102 | ,000             | ,000  | ,000  | ,000  |
|                           | 403133106 | ,000             | ,000  | ,000  | ,000  |
|                           | 403133107 | ,000             | ,000  | ,000  | ,000  |
|                           | 403133109 | ,000             | ,000  | ,000  | ,000  |
|                           | 403133202 | ,000             | ,000  | ,000  | ,000  |
|                           | 403133203 | ,000             | ,000  | ,000  | ,000  |
|                           | 403133204 | ,000             | ,000  | ,000  | ,000  |
|                           | 403133315 | ,000             | ,000  | ,000  | ,000  |
|                           | 403133322 | ,000             | ,000  | ,000  | ,000  |
|                           | 403133401 | ,000             | ,000  | ,000  | ,000  |
|                           | 403133402 | ,000             | ,000  | ,000  | ,000  |
|                           | 403133550 | 1,000            | ,000  | ,000  | ,000  |
|                           | 403133772 | ,000             | 1,000 | ,000  | ,000  |
|                           | 403135803 | ,000             | ,000  | 1,000 | ,000  |
|                           | 404060001 | ,000             | ,000  | ,000  | 1,000 |
|                           | 404060002 | ,000             | ,000  | ,000  | ,000  |
|                           | 404310003 | ,000             | ,000  | ,000  | ,000  |
|                           | 404310004 | ,000             | ,000  | ,000  | ,000  |

## Categorical Variables Codings

|                           |           | Parameter coding |       |       |      |
|---------------------------|-----------|------------------|-------|-------|------|
|                           |           | (24)             | (25)  | (26)  | (27) |
| VASTY2 (SAIR*10000)+VASTY | 403073101 | ,000             | ,000  | ,000  | ,000 |
|                           | 403073102 | ,000             | ,000  | ,000  | ,000 |
|                           | 403073103 | ,000             | ,000  | ,000  | ,000 |
|                           | 403073202 | ,000             | ,000  | ,000  | ,000 |
|                           | 403073203 | ,000             | ,000  | ,000  | ,000 |
|                           | 403073204 | ,000             | ,000  | ,000  | ,000 |
|                           | 403073303 | ,000             | ,000  | ,000  | ,000 |
|                           | 403073651 | ,000             | ,000  | ,000  | ,000 |
|                           | 403073771 | ,000             | ,000  | ,000  | ,000 |
|                           | 403133102 | ,000             | ,000  | ,000  | ,000 |
|                           | 403133106 | ,000             | ,000  | ,000  | ,000 |
|                           | 403133107 | ,000             | ,000  | ,000  | ,000 |
|                           | 403133109 | ,000             | ,000  | ,000  | ,000 |
|                           | 403133202 | ,000             | ,000  | ,000  | ,000 |
|                           | 403133203 | ,000             | ,000  | ,000  | ,000 |
|                           | 403133204 | ,000             | ,000  | ,000  | ,000 |
|                           | 403133315 | ,000             | ,000  | ,000  | ,000 |
|                           | 403133322 | ,000             | ,000  | ,000  | ,000 |
|                           | 403133401 | ,000             | ,000  | ,000  | ,000 |
|                           | 403133402 | ,000             | ,000  | ,000  | ,000 |
|                           | 403133550 | ,000             | ,000  | ,000  | ,000 |
|                           | 403133772 | ,000             | ,000  | ,000  | ,000 |
|                           | 403135803 | ,000             | ,000  | ,000  | ,000 |
|                           | 404060001 | ,000             | ,000  | ,000  | ,000 |
|                           | 404060002 | 1,000            | ,000  | ,000  | ,000 |
|                           | 404310003 | ,000             | 1,000 | ,000  | ,000 |
|                           | 404310004 | ,000             | ,000  | 1,000 | ,000 |

## Categorical Variables Codings

|                           |           | Parameter coding |      |      |      |
|---------------------------|-----------|------------------|------|------|------|
|                           |           | (28)             | (29) | (30) | (31) |
| VASTY2 (SAIR*10000)+VASTY | 403073101 | ,000             | ,000 | ,000 | ,000 |
|                           | 403073102 | ,000             | ,000 | ,000 | ,000 |
|                           | 403073103 | ,000             | ,000 | ,000 | ,000 |
|                           | 403073202 | ,000             | ,000 | ,000 | ,000 |
|                           | 403073203 | ,000             | ,000 | ,000 | ,000 |
|                           | 403073204 | ,000             | ,000 | ,000 | ,000 |
|                           | 403073303 | ,000             | ,000 | ,000 | ,000 |
|                           | 403073651 | ,000             | ,000 | ,000 | ,000 |
|                           | 403073771 | ,000             | ,000 | ,000 | ,000 |
|                           | 403133102 | ,000             | ,000 | ,000 | ,000 |
|                           | 403133106 | ,000             | ,000 | ,000 | ,000 |
|                           | 403133107 | ,000             | ,000 | ,000 | ,000 |
|                           | 403133109 | ,000             | ,000 | ,000 | ,000 |
|                           | 403133202 | ,000             | ,000 | ,000 | ,000 |
|                           | 403133203 | ,000             | ,000 | ,000 | ,000 |
|                           | 403133204 | ,000             | ,000 | ,000 | ,000 |
|                           | 403133315 | ,000             | ,000 | ,000 | ,000 |
|                           | 403133322 | ,000             | ,000 | ,000 | ,000 |
|                           | 403133401 | ,000             | ,000 | ,000 | ,000 |
|                           | 403133402 | ,000             | ,000 | ,000 | ,000 |
|                           | 403133550 | ,000             | ,000 | ,000 | ,000 |
|                           | 403133772 | ,000             | ,000 | ,000 | ,000 |
|                           | 403135803 | ,000             | ,000 | ,000 | ,000 |
|                           | 404060001 | ,000             | ,000 | ,000 | ,000 |
|                           | 404060002 | ,000             | ,000 | ,000 | ,000 |
|                           | 404310003 | ,000             | ,000 | ,000 | ,000 |
|                           | 404310004 | ,000             | ,000 | ,000 | ,000 |

## Categorical Variables Codings

|                           |           | Parameter coding |      |      |      |
|---------------------------|-----------|------------------|------|------|------|
|                           |           | (32)             | (33) | (34) | (35) |
| VASTY2 (SAIR*10000)+VASTY | 403073101 | ,000             | ,000 | ,000 | ,000 |
|                           | 403073102 | ,000             | ,000 | ,000 | ,000 |
|                           | 403073103 | ,000             | ,000 | ,000 | ,000 |
|                           | 403073202 | ,000             | ,000 | ,000 | ,000 |
|                           | 403073203 | ,000             | ,000 | ,000 | ,000 |
|                           | 403073204 | ,000             | ,000 | ,000 | ,000 |
|                           | 403073303 | ,000             | ,000 | ,000 | ,000 |
|                           | 403073651 | ,000             | ,000 | ,000 | ,000 |
|                           | 403073771 | ,000             | ,000 | ,000 | ,000 |
|                           | 403133102 | ,000             | ,000 | ,000 | ,000 |
|                           | 403133106 | ,000             | ,000 | ,000 | ,000 |
|                           | 403133107 | ,000             | ,000 | ,000 | ,000 |
|                           | 403133109 | ,000             | ,000 | ,000 | ,000 |
|                           | 403133202 | ,000             | ,000 | ,000 | ,000 |
|                           | 403133203 | ,000             | ,000 | ,000 | ,000 |
|                           | 403133204 | ,000             | ,000 | ,000 | ,000 |
|                           | 403133315 | ,000             | ,000 | ,000 | ,000 |
|                           | 403133322 | ,000             | ,000 | ,000 | ,000 |
|                           | 403133401 | ,000             | ,000 | ,000 | ,000 |
|                           | 403133402 | ,000             | ,000 | ,000 | ,000 |
|                           | 403133550 | ,000             | ,000 | ,000 | ,000 |
|                           | 403133772 | ,000             | ,000 | ,000 | ,000 |
|                           | 403135803 | ,000             | ,000 | ,000 | ,000 |
|                           | 404060001 | ,000             | ,000 | ,000 | ,000 |
|                           | 404060002 | ,000             | ,000 | ,000 | ,000 |
|                           | 404310003 | ,000             | ,000 | ,000 | ,000 |
|                           | 404310004 | ,000             | ,000 | ,000 | ,000 |

## Categorical Variables Codings

|                           |                   | Frequency | Parameter coding |       |      |
|---------------------------|-------------------|-----------|------------------|-------|------|
|                           |                   |           | (1)              | (2)   | (3)  |
|                           | 502300005         | 366       | ,000             | ,000  | ,000 |
|                           | 502300006         | 225       | ,000             | ,000  | ,000 |
|                           | 502300007         | 366       | ,000             | ,000  | ,000 |
|                           | 502300214         | 366       | ,000             | ,000  | ,000 |
|                           | 502300411         | 366       | ,000             | ,000  | ,000 |
|                           | 502300415         | 360       | ,000             | ,000  | ,000 |
|                           | 502300416         | 363       | ,000             | ,000  | ,000 |
|                           | 502300811         | 364       | ,000             | ,000  | ,000 |
|                           | 502300913         | 315       | ,000             | ,000  | ,000 |
| bv1 belastning vs paoncil | 1 medelbelastning | 5380      | ,000             | ,000  |      |
|                           | 2 underbelastning | 3222      | 1,000            | ,000  |      |
|                           | 3 överbelastning  | 3873      | ,000             | 1,000 |      |

## Categorical Variables Codings

|                           |                   | Parameter coding |      |      |      |
|---------------------------|-------------------|------------------|------|------|------|
|                           |                   | (4)              | (5)  | (6)  | (7)  |
|                           | 502300005         | ,000             | ,000 | ,000 | ,000 |
|                           | 502300006         | ,000             | ,000 | ,000 | ,000 |
|                           | 502300007         | ,000             | ,000 | ,000 | ,000 |
|                           | 502300214         | ,000             | ,000 | ,000 | ,000 |
|                           | 502300411         | ,000             | ,000 | ,000 | ,000 |
|                           | 502300415         | ,000             | ,000 | ,000 | ,000 |
|                           | 502300416         | ,000             | ,000 | ,000 | ,000 |
|                           | 502300811         | ,000             | ,000 | ,000 | ,000 |
|                           | 502300913         | ,000             | ,000 | ,000 | ,000 |
| bv1 belastning vs paoncil | 1 medelbelastning |                  |      |      |      |
|                           | 2 underbelastning |                  |      |      |      |
|                           | 3 överbelastning  |                  |      |      |      |



## Categorical Variables Codings

|                           |                   | Parameter coding |      |      |      |
|---------------------------|-------------------|------------------|------|------|------|
|                           |                   | (8)              | (9)  | (10) | (11) |
|                           | 502300005         | ,000             | ,000 | ,000 | ,000 |
|                           | 502300006         | ,000             | ,000 | ,000 | ,000 |
|                           | 502300007         | ,000             | ,000 | ,000 | ,000 |
|                           | 502300214         | ,000             | ,000 | ,000 | ,000 |
|                           | 502300411         | ,000             | ,000 | ,000 | ,000 |
|                           | 502300415         | ,000             | ,000 | ,000 | ,000 |
|                           | 502300416         | ,000             | ,000 | ,000 | ,000 |
|                           | 502300811         | ,000             | ,000 | ,000 | ,000 |
|                           | 502300913         | ,000             | ,000 | ,000 | ,000 |
| bv1 belastning vs paoncil | 1 medelbelastning |                  |      |      |      |
|                           | 2 underbelastning |                  |      |      |      |
|                           | 3 överbelastning  |                  |      |      |      |

## Categorical Variables Codings

|                           |                   | Parameter coding |      |      |      |
|---------------------------|-------------------|------------------|------|------|------|
|                           |                   | (12)             | (13) | (14) | (15) |
|                           | 502300005         | ,000             | ,000 | ,000 | ,000 |
|                           | 502300006         | ,000             | ,000 | ,000 | ,000 |
|                           | 502300007         | ,000             | ,000 | ,000 | ,000 |
|                           | 502300214         | ,000             | ,000 | ,000 | ,000 |
|                           | 502300411         | ,000             | ,000 | ,000 | ,000 |
|                           | 502300415         | ,000             | ,000 | ,000 | ,000 |
|                           | 502300416         | ,000             | ,000 | ,000 | ,000 |
|                           | 502300811         | ,000             | ,000 | ,000 | ,000 |
|                           | 502300913         | ,000             | ,000 | ,000 | ,000 |
| bv1 belastning vs paoncil | 1 medelbelastning |                  |      |      |      |
|                           | 2 underbelastning |                  |      |      |      |
|                           | 3 överbelastning  |                  |      |      |      |

## Categorical Variables Codings

|                           |                   | Parameter coding |      |      |      |
|---------------------------|-------------------|------------------|------|------|------|
|                           |                   | (16)             | (17) | (18) | (19) |
|                           | 502300005         | ,000             | ,000 | ,000 | ,000 |
|                           | 502300006         | ,000             | ,000 | ,000 | ,000 |
|                           | 502300007         | ,000             | ,000 | ,000 | ,000 |
|                           | 502300214         | ,000             | ,000 | ,000 | ,000 |
|                           | 502300411         | ,000             | ,000 | ,000 | ,000 |
|                           | 502300415         | ,000             | ,000 | ,000 | ,000 |
|                           | 502300416         | ,000             | ,000 | ,000 | ,000 |
|                           | 502300811         | ,000             | ,000 | ,000 | ,000 |
|                           | 502300913         | ,000             | ,000 | ,000 | ,000 |
| bv1 belastning vs paoncil | 1 medelbelastning |                  |      |      |      |
|                           | 2 underbelastning |                  |      |      |      |
|                           | 3 överbelastning  |                  |      |      |      |

## Categorical Variables Codings

|                           |                   | Parameter coding |      |      |      |
|---------------------------|-------------------|------------------|------|------|------|
|                           |                   | (20)             | (21) | (22) | (23) |
|                           | 502300005         | ,000             | ,000 | ,000 | ,000 |
|                           | 502300006         | ,000             | ,000 | ,000 | ,000 |
|                           | 502300007         | ,000             | ,000 | ,000 | ,000 |
|                           | 502300214         | ,000             | ,000 | ,000 | ,000 |
|                           | 502300411         | ,000             | ,000 | ,000 | ,000 |
|                           | 502300415         | ,000             | ,000 | ,000 | ,000 |
|                           | 502300416         | ,000             | ,000 | ,000 | ,000 |
|                           | 502300811         | ,000             | ,000 | ,000 | ,000 |
|                           | 502300913         | ,000             | ,000 | ,000 | ,000 |
| bv1 belastning vs paoncil | 1 medelbelastning |                  |      |      |      |
|                           | 2 underbelastning |                  |      |      |      |
|                           | 3 överbelastning  |                  |      |      |      |

## Categorical Variables Codings

|                           |                   | Parameter coding |      |      |       |
|---------------------------|-------------------|------------------|------|------|-------|
|                           |                   | (24)             | (25) | (26) | (27)  |
|                           | 502300005         | ,000             | ,000 | ,000 | 1,000 |
|                           | 502300006         | ,000             | ,000 | ,000 | ,000  |
|                           | 502300007         | ,000             | ,000 | ,000 | ,000  |
|                           | 502300214         | ,000             | ,000 | ,000 | ,000  |
|                           | 502300411         | ,000             | ,000 | ,000 | ,000  |
|                           | 502300415         | ,000             | ,000 | ,000 | ,000  |
|                           | 502300416         | ,000             | ,000 | ,000 | ,000  |
|                           | 502300811         | ,000             | ,000 | ,000 | ,000  |
|                           | 502300913         | ,000             | ,000 | ,000 | ,000  |
| bv1 belastning vs paoncil | 1 medelbelastning |                  |      |      |       |
|                           | 2 underbelastning |                  |      |      |       |
|                           | 3 överbelastning  |                  |      |      |       |

## Categorical Variables Codings

|                           |                   | Parameter coding |       |       |       |
|---------------------------|-------------------|------------------|-------|-------|-------|
|                           |                   | (28)             | (29)  | (30)  | (31)  |
|                           | 502300005         | ,000             | ,000  | ,000  | ,000  |
|                           | 502300006         | 1,000            | ,000  | ,000  | ,000  |
|                           | 502300007         | ,000             | 1,000 | ,000  | ,000  |
|                           | 502300214         | ,000             | ,000  | 1,000 | ,000  |
|                           | 502300411         | ,000             | ,000  | ,000  | 1,000 |
|                           | 502300415         | ,000             | ,000  | ,000  | ,000  |
|                           | 502300416         | ,000             | ,000  | ,000  | ,000  |
|                           | 502300811         | ,000             | ,000  | ,000  | ,000  |
|                           | 502300913         | ,000             | ,000  | ,000  | ,000  |
| bv1 belastning vs paoncil | 1 medelbelastning |                  |       |       |       |
|                           | 2 underbelastning |                  |       |       |       |
|                           | 3 överbelastning  |                  |       |       |       |

## Categorical Variables Codings

|                           |                   | Parameter coding |       |       |       |
|---------------------------|-------------------|------------------|-------|-------|-------|
|                           |                   | (32)             | (33)  | (34)  | (35)  |
|                           | 502300005         | ,000             | ,000  | ,000  | ,000  |
|                           | 502300006         | ,000             | ,000  | ,000  | ,000  |
|                           | 502300007         | ,000             | ,000  | ,000  | ,000  |
|                           | 502300214         | ,000             | ,000  | ,000  | ,000  |
|                           | 502300411         | ,000             | ,000  | ,000  | ,000  |
|                           | 502300415         | 1,000            | ,000  | ,000  | ,000  |
|                           | 502300416         | ,000             | 1,000 | ,000  | ,000  |
|                           | 502300811         | ,000             | ,000  | 1,000 | ,000  |
|                           | 502300913         | ,000             | ,000  | ,000  | 1,000 |
| bv1 belastning vs paencil | 1 medelbelastning |                  |       |       |       |
|                           | 2 underbelastning |                  |       |       |       |
|                           | 3 överbelastning  |                  |       |       |       |

## Block 0: Beginning Block

Classification Table<sup>a,b</sup>

| Observed           |                                |                           | Predicted                 |                      |
|--------------------|--------------------------------|---------------------------|---------------------------|----------------------|
|                    |                                |                           | 0 ingen eller en händelse | 1 mer än en händelse |
| Step 0             | handlt1 händelse larger than 1 | 0 ingen eller en händelse | 12229                     | 0                    |
|                    |                                | 1 mer än en händelse      | 246                       | 0                    |
| Overall Percentage |                                |                           |                           |                      |

Classification Table<sup>a,b</sup>

| Observed           |                                |                           | Predicted          |
|--------------------|--------------------------------|---------------------------|--------------------|
|                    |                                |                           | Percentage Correct |
| Step 0             | handlt1 händelse larger than 1 | 0 ingen eller en händelse | 100,0              |
|                    |                                | 1 mer än en händelse      | ,0                 |
| Overall Percentage |                                |                           | 98,0               |

a. Constant is included in the model.

b. The cut value is ,500

## Variables in the Equation

|                 | B      | S.E. | Wald     | df | Sig. | Exp(B) |
|-----------------|--------|------|----------|----|------|--------|
| Step 0 Constant | -3,906 | ,064 | 3679,612 | 1  | ,000 | ,020   |

## Variables not in the Equation

|        |                    | Score   | df | Sig. |
|--------|--------------------|---------|----|------|
| Step 0 | Variables          |         |    |      |
|        | bv1                | 11,924  | 2  | ,003 |
|        | bv1(1)             | 9,129   | 1  | ,003 |
|        | bv1(2)             | 7,462   | 1  | ,006 |
|        | VASTY2             | 211,294 | 35 | ,000 |
|        | VASTY2(1)          | ,109    | 1  | ,741 |
|        | VASTY2(2)          | 2,111   | 1  | ,146 |
|        | VASTY2(3)          | 5,608   | 1  | ,018 |
|        | VASTY2(4)          | ,094    | 1  | ,759 |
|        | VASTY2(5)          | 1,981   | 1  | ,159 |
|        | VASTY2(6)          | 7,542   | 1  | ,006 |
|        | VASTY2(7)          | 3,478   | 1  | ,062 |
|        | VASTY2(8)          | ,006    | 1  | ,940 |
|        | VASTY2(9)          | ,082    | 1  | ,775 |
|        | VASTY2(10)         | 36,459  | 1  | ,000 |
|        | VASTY2(11)         | 27,814  | 1  | ,000 |
|        | VASTY2(12)         | 2,573   | 1  | ,109 |
|        | VASTY2(13)         | ,705    | 1  | ,401 |
|        | VASTY2(14)         | ,209    | 1  | ,647 |
|        | VASTY2(15)         | ,209    | 1  | ,647 |
|        | VASTY2(16)         | ,071    | 1  | ,789 |
|        | VASTY2(17)         | 7,564   | 1  | ,006 |
|        | VASTY2(18)         | 7,500   | 1  | ,006 |
|        | VASTY2(19)         | 5,608   | 1  | ,018 |
|        | VASTY2(20)         | 1,471   | 1  | ,225 |
|        | VASTY2(21)         | 2,573   | 1  | ,109 |
|        | VASTY2(22)         | ,474    | 1  | ,491 |
|        | VASTY2(23)         | 41,219  | 1  | ,000 |
|        | VASTY2(24)         | 20,216  | 1  | ,000 |
|        | VASTY2(25)         | ,290    | 1  | ,590 |
|        | VASTY2(26)         | ,550    | 1  | ,458 |
|        | VASTY2(27)         | 5,629   | 1  | ,018 |
|        | VASTY2(28)         | 2,766   | 1  | ,096 |
|        | VASTY2(29)         | 7,585   | 1  | ,006 |
|        | VASTY2(30)         | ,089    | 1  | ,765 |
|        | VASTY2(31)         | 8,820   | 1  | ,003 |
|        | VASTY2(32)         | ,652    | 1  | ,419 |
|        | VASTY2(33)         | 1,464   | 1  | ,226 |
|        | VASTY2(34)         | 5,587   | 1  | ,018 |
|        | VASTY2(35)         | 7,764   | 1  | ,005 |
|        | Overall Statistics | 222,242 | 37 | ,000 |

**Block 1: Method = Enter**

## Omnibus Tests of Model Coefficients

|        |       | Chi-square | df | Sig. |
|--------|-------|------------|----|------|
| Step 1 | Step  | 220,073    | 37 | ,000 |
|        | Block | 220,073    | 37 | ,000 |
|        | Model | 220,073    | 37 | ,000 |

## Model Summary

| Step | -2 Log likelihood     | Cox & Snell R Square | Nagelkerke R Square |
|------|-----------------------|----------------------|---------------------|
| 1    | 2198,710 <sup>a</sup> | ,017                 | ,099                |

a. Estimation terminated at iteration number 20 because maximum iterations has been reached. Final solution cannot be found.

Classification Table<sup>a</sup>

|                    |                                |                           | Predicted                 |                      |
|--------------------|--------------------------------|---------------------------|---------------------------|----------------------|
|                    |                                |                           | 0 ingen eller en händelse | 1 mer än en händelse |
|                    | Observed                       |                           |                           |                      |
| Step 1             | handlt1 händelse larger than 1 | 0 ingen eller en händelse | 12229                     | 0                    |
|                    |                                | 1 mer än en händelse      | 246                       | 0                    |
| Overall Percentage |                                |                           |                           |                      |

Classification Table<sup>a</sup>

|                    |                                |                           | Predicted          |
|--------------------|--------------------------------|---------------------------|--------------------|
|                    |                                |                           | Percentage Correct |
|                    | Observed                       |                           |                    |
| Step 1             | handlt1 händelse larger than 1 | 0 ingen eller en händelse | 100,0              |
|                    |                                | 1 mer än en händelse      | ,0                 |
| Overall Percentage |                                |                           | 98,0               |

a. The cut value is ,500

Variables in the Equation

|                         | B       | S.E.     | Wald    | df | Sig. | Exp(B) |
|-------------------------|---------|----------|---------|----|------|--------|
| Step 1 <sup>a</sup> bv1 |         |          | 10,930  | 2  | ,004 |        |
| bv1(1)                  | -,349   | ,189     | 3,402   | 1  | ,065 | ,706   |
| bv1(2)                  | ,302    | ,152     | 3,935   | 1  | ,047 | 1,352  |
| VASTY2                  |         |          | 120,570 | 35 | ,000 |        |
| VASTY2(1)               | ,467    | ,575     | ,658    | 1  | ,417 | 1,595  |
| VASTY2(2)               | ,739    | ,545     | 1,837   | 1  | ,175 | 2,094  |
| VASTY2(3)               | -1,847  | 1,101    | 2,816   | 1  | ,093 | ,158   |
| VASTY2(4)               | ,299    | ,578     | ,267    | 1  | ,605 | 1,348  |
| VASTY2(5)               | -,501   | ,735     | ,464    | 1  | ,496 | ,606   |
| VASTY2(6)               | -17,067 | 2099,887 | ,000    | 1  | ,994 | ,000   |
| VASTY2(7)               | ,661    | ,545     | 1,471   | 1  | ,225 | 1,936  |
| VASTY2(8)               | ,228    | ,591     | ,149    | 1  | ,699 | 1,257  |
| VASTY2(9)               | ,126    | ,612     | ,042    | 1  | ,837 | 1,134  |
| VASTY2(10)              | 1,478   | ,500     | 8,729   | 1  | ,003 | 4,384  |
| VASTY2(11)              | 1,431   | ,504     | 8,054   | 1  | ,005 | 4,182  |
| VASTY2(12)              | -,618   | ,735     | ,708    | 1  | ,400 | ,539   |
| VASTY2(13)              | -,205   | ,640     | ,102    | 1  | ,749 | ,815   |
| VASTY2(14)              | ,065    | ,612     | ,011    | 1  | ,915 | 1,068  |
| VASTY2(15)              | ,103    | ,611     | ,028    | 1  | ,866 | 1,108  |
| VASTY2(16)              | ,164    | ,738     | ,050    | 1  | ,824 | 1,179  |
| VASTY2(17)              | -16,898 | 2096,665 | ,000    | 1  | ,994 | ,000   |
| VASTY2(18)              | -16,941 | 2104,491 | ,000    | 1  | ,994 | ,000   |
| VASTY2(19)              | -1,349  | 1,105    | 1,490   | 1  | ,222 | ,260   |
| VASTY2(20)              | -,442   | ,737     | ,359    | 1  | ,549 | ,643   |
| VASTY2(21)              | -,582   | ,735     | ,629    | 1  | ,428 | ,559   |
| VASTY2(22)              | ,725    | ,565     | 1,647   | 1  | ,199 | 2,064  |
| VASTY2(23)              | 1,650   | ,498     | 10,989  | 1  | ,001 | 5,208  |
| VASTY2(24)              | 1,197   | ,512     | 5,478   | 1  | ,019 | 3,311  |
| VASTY2(25)              | ,586    | ,591     | ,984    | 1  | ,321 | 1,798  |
| VASTY2(26)              | -,096   | ,677     | ,020    | 1  | ,888 | ,909   |
| VASTY2(27)              | -1,757  | 1,099    | 2,555   | 1  | ,110 | ,173   |
| VASTY2(28)              | -1,293  | 1,100    | 1,382   | 1  | ,240 | ,274   |
| VASTY2(29)              | -17,003 | 2095,464 | ,000    | 1  | ,994 | ,000   |
| VASTY2(30)              | ,402    | ,576     | ,487    | 1  | ,485 | 1,495  |
| VASTY2(31)              | 1,084   | ,524     | 4,279   | 1  | ,039 | 2,958  |
| VASTY2(32)              | ,050    | ,639     | ,006    | 1  | ,938 | 1,051  |
| VASTY2(33)              | -,206   | ,676     | ,093    | 1  | ,760 | ,814   |
| VASTY2(34)              | -1,664  | 1,098    | 2,295   | 1  | ,130 | ,189   |
| VASTY2(35)              | ,954    | ,537     | 3,156   | 1  | ,076 | 2,596  |
| Constant                | -4,232  | ,454     | 86,955  | 1  | ,000 | ,015   |

## Variables in the Equation

|                     |            | 95% C.I. for EXP(B) |        |
|---------------------|------------|---------------------|--------|
|                     |            | Lower               | Upper  |
| Step 1 <sup>a</sup> | bv1        |                     |        |
|                     | bv1(1)     | ,487                | 1,022  |
|                     | bv1(2)     | 1,004               | 1,822  |
|                     | VASTY2     |                     |        |
|                     | VASTY2(1)  | ,516                | 4,926  |
|                     | VASTY2(2)  | ,719                | 6,094  |
|                     | VASTY2(3)  | ,018                | 1,364  |
|                     | VASTY2(4)  | ,434                | 4,189  |
|                     | VASTY2(5)  | ,143                | 2,561  |
|                     | VASTY2(6)  | ,000                | .      |
|                     | VASTY2(7)  | ,666                | 5,633  |
|                     | VASTY2(8)  | ,394                | 4,006  |
|                     | VASTY2(9)  | ,342                | 3,765  |
|                     | VASTY2(10) | 1,645               | 11,685 |
|                     | VASTY2(11) | 1,557               | 11,233 |
|                     | VASTY2(12) | ,128                | 2,275  |
|                     | VASTY2(13) | ,232                | 2,858  |
|                     | VASTY2(14) | ,322                | 3,543  |
|                     | VASTY2(15) | ,335                | 3,670  |
|                     | VASTY2(16) | ,278                | 5,003  |
|                     | VASTY2(17) | ,000                | .      |
|                     | VASTY2(18) | ,000                | .      |
|                     | VASTY2(19) | ,030                | 2,263  |
|                     | VASTY2(20) | ,152                | 2,725  |
|                     | VASTY2(21) | ,132                | 2,357  |
|                     | VASTY2(22) | ,683                | 6,240  |
|                     | VASTY2(23) | 1,963               | 13,818 |
|                     | VASTY2(24) | 1,215               | 9,024  |
|                     | VASTY2(25) | ,564                | 5,726  |
|                     | VASTY2(26) | ,241                | 3,425  |
|                     | VASTY2(27) | ,020                | 1,488  |
|                     | VASTY2(28) | ,032                | 2,370  |
|                     | VASTY2(29) | ,000                | .      |
|                     | VASTY2(30) | ,484                | 4,618  |
|                     | VASTY2(31) | 1,059               | 8,264  |
|                     | VASTY2(32) | ,301                | 3,675  |
|                     | VASTY2(33) | ,216                | 3,060  |
|                     | VASTY2(34) | ,022                | 1,630  |
|                     | VASTY2(35) | ,906                | 7,438  |
|                     | Constant   |                     |        |

a. Variable(s) entered on step 1: bv1, VASTY2.



```

1
2
3 LOGISTIC REGRESSION VARIABLES handlt1
4   /METHOD=ENTER bv2 VASTY2
5   /CONTRAST (bv2)=Indicator(1)
6   /CONTRAST (VASTY2)=Indicator(1)
7   /PRINT=CI(95)
8   /CRITERIA=PIN(0.05) POUT(0.10) ITERATE(20) CUT(0.5).
9
10
11

```

## Logistic Regression

[DataSet6] C:\cWordjan\Rafaela\_VCS\alla\_tillsammans\abo\_bjo\_vasa\_v1.sav

### Case Processing Summary

| Unweighted Cases <sup>a</sup> |                      | N     | Percent |
|-------------------------------|----------------------|-------|---------|
| Selected Cases                | Included in Analysis | 12475 | 100,0   |
|                               | Missing Cases        | 0     | ,0      |
|                               | Total                | 12475 | 100,0   |
| Unselected Cases              |                      | 0     | ,0      |
| Total                         |                      | 12475 | 100,0   |

a. If weight is in effect, see classification table for the total number of cases.

### Dependent Variable Encoding

| Original Value            | Internal Value |
|---------------------------|----------------|
| 0 ingen eller en händelse | 0              |
| 1 mer än en händelse      | 1              |

## Categorical Variables Codings

|                                             |                   | Frequency | Parameter coding |       |
|---------------------------------------------|-------------------|-----------|------------------|-------|
|                                             |                   |           | (1)              | (2)   |
| VASTY2 (SAIR*10000)+VASTY                   | 403073101         | 365       | ,000             | ,000  |
|                                             | 403073102         | 362       | 1,000            | ,000  |
|                                             | 403073103         | 365       | ,000             | 1,000 |
|                                             | 403073202         | 365       | ,000             | ,000  |
|                                             | 403073203         | 365       | ,000             | ,000  |
|                                             | 403073204         | 330       | ,000             | ,000  |
|                                             | 403073303         | 364       | ,000             | ,000  |
|                                             | 403073651         | 362       | ,000             | ,000  |
|                                             | 403073771         | 365       | ,000             | ,000  |
|                                             | 403133102         | 341       | ,000             | ,000  |
|                                             | 403133106         | 365       | ,000             | ,000  |
|                                             | 403133107         | 365       | ,000             | ,000  |
|                                             | 403133109         | 365       | ,000             | ,000  |
|                                             | 403133202         | 365       | ,000             | ,000  |
|                                             | 403133203         | 365       | ,000             | ,000  |
|                                             | 403133204         | 365       | ,000             | ,000  |
|                                             | 403133315         | 177       | ,000             | ,000  |
|                                             | 403133322         | 365       | ,000             | ,000  |
|                                             | 403133401         | 362       | ,000             | ,000  |
|                                             | 403133402         | 365       | ,000             | ,000  |
|                                             | 403133550         | 298       | ,000             | ,000  |
|                                             | 403133772         | 365       | ,000             | ,000  |
|                                             | 403135803         | 365       | ,000             | ,000  |
|                                             | 404060001         | 365       | ,000             | ,000  |
|                                             | 404060002         | 366       | ,000             | ,000  |
|                                             | 404310003         | 291       | ,000             | ,000  |
|                                             | 404310004         | 291       | ,000             | ,000  |
|                                             | 502300005         | 366       | ,000             | ,000  |
|                                             | 502300006         | 225       | ,000             | ,000  |
|                                             | 502300007         | 366       | ,000             | ,000  |
|                                             | 502300214         | 366       | ,000             | ,000  |
|                                             | 502300411         | 366       | ,000             | ,000  |
|                                             | 502300415         | 360       | ,000             | ,000  |
|                                             | 502300416         | 363       | ,000             | ,000  |
|                                             | 502300811         | 364       | ,000             | ,000  |
|                                             | 502300913         | 315       | ,000             | ,000  |
| bv2 belastning vs paoncil halva intervallet | 1 medelbelastning | 2788      | ,000             | ,000  |
|                                             | 2 underbelastning | 4419      | 1,000            | ,000  |
|                                             | 3 överbelastning  | 5268      | ,000             | 1,000 |

## Categorical Variables Codings

|                                             |                   | Parameter coding |       |       |
|---------------------------------------------|-------------------|------------------|-------|-------|
|                                             |                   | (3)              | (4)   | (5)   |
| VASTY2 (SAIR*10000)+VASTY                   | 403073101         | ,000             | ,000  | ,000  |
|                                             | 403073102         | ,000             | ,000  | ,000  |
|                                             | 403073103         | ,000             | ,000  | ,000  |
|                                             | 403073202         | 1,000            | ,000  | ,000  |
|                                             | 403073203         | ,000             | 1,000 | ,000  |
|                                             | 403073204         | ,000             | ,000  | 1,000 |
|                                             | 403073303         | ,000             | ,000  | ,000  |
|                                             | 403073651         | ,000             | ,000  | ,000  |
|                                             | 403073771         | ,000             | ,000  | ,000  |
|                                             | 403133102         | ,000             | ,000  | ,000  |
|                                             | 403133106         | ,000             | ,000  | ,000  |
|                                             | 403133107         | ,000             | ,000  | ,000  |
|                                             | 403133109         | ,000             | ,000  | ,000  |
|                                             | 403133202         | ,000             | ,000  | ,000  |
|                                             | 403133203         | ,000             | ,000  | ,000  |
|                                             | 403133204         | ,000             | ,000  | ,000  |
|                                             | 403133315         | ,000             | ,000  | ,000  |
|                                             | 403133322         | ,000             | ,000  | ,000  |
|                                             | 403133401         | ,000             | ,000  | ,000  |
|                                             | 403133402         | ,000             | ,000  | ,000  |
|                                             | 403133550         | ,000             | ,000  | ,000  |
|                                             | 403133772         | ,000             | ,000  | ,000  |
|                                             | 403135803         | ,000             | ,000  | ,000  |
|                                             | 404060001         | ,000             | ,000  | ,000  |
|                                             | 404060002         | ,000             | ,000  | ,000  |
|                                             | 404310003         | ,000             | ,000  | ,000  |
|                                             | 404310004         | ,000             | ,000  | ,000  |
|                                             | 502300005         | ,000             | ,000  | ,000  |
|                                             | 502300006         | ,000             | ,000  | ,000  |
|                                             | 502300007         | ,000             | ,000  | ,000  |
|                                             | 502300214         | ,000             | ,000  | ,000  |
|                                             | 502300411         | ,000             | ,000  | ,000  |
|                                             | 502300415         | ,000             | ,000  | ,000  |
|                                             | 502300416         | ,000             | ,000  | ,000  |
|                                             | 502300811         | ,000             | ,000  | ,000  |
|                                             | 502300913         | ,000             | ,000  | ,000  |
| bv2 belastning vs paoncil halva intervallet | 1 medelbelastning |                  |       |       |
|                                             | 2 underbelastning |                  |       |       |
|                                             | 3 överbelastning  |                  |       |       |

## Categorical Variables Codings

|                                             |                   | Parameter coding |       |       |
|---------------------------------------------|-------------------|------------------|-------|-------|
|                                             |                   | (6)              | (7)   | (8)   |
| VASTY2 (SAIR*10000)+VASTY                   | 403073101         | ,000             | ,000  | ,000  |
|                                             | 403073102         | ,000             | ,000  | ,000  |
|                                             | 403073103         | ,000             | ,000  | ,000  |
|                                             | 403073202         | ,000             | ,000  | ,000  |
|                                             | 403073203         | ,000             | ,000  | ,000  |
|                                             | 403073204         | ,000             | ,000  | ,000  |
|                                             | 403073303         | 1,000            | ,000  | ,000  |
|                                             | 403073651         | ,000             | 1,000 | ,000  |
|                                             | 403073771         | ,000             | ,000  | 1,000 |
|                                             | 403133102         | ,000             | ,000  | ,000  |
|                                             | 403133106         | ,000             | ,000  | ,000  |
|                                             | 403133107         | ,000             | ,000  | ,000  |
|                                             | 403133109         | ,000             | ,000  | ,000  |
|                                             | 403133202         | ,000             | ,000  | ,000  |
|                                             | 403133203         | ,000             | ,000  | ,000  |
|                                             | 403133204         | ,000             | ,000  | ,000  |
|                                             | 403133315         | ,000             | ,000  | ,000  |
|                                             | 403133322         | ,000             | ,000  | ,000  |
|                                             | 403133401         | ,000             | ,000  | ,000  |
|                                             | 403133402         | ,000             | ,000  | ,000  |
|                                             | 403133550         | ,000             | ,000  | ,000  |
|                                             | 403133772         | ,000             | ,000  | ,000  |
|                                             | 403135803         | ,000             | ,000  | ,000  |
|                                             | 404060001         | ,000             | ,000  | ,000  |
|                                             | 404060002         | ,000             | ,000  | ,000  |
|                                             | 404310003         | ,000             | ,000  | ,000  |
|                                             | 404310004         | ,000             | ,000  | ,000  |
|                                             | 502300005         | ,000             | ,000  | ,000  |
|                                             | 502300006         | ,000             | ,000  | ,000  |
|                                             | 502300007         | ,000             | ,000  | ,000  |
|                                             | 502300214         | ,000             | ,000  | ,000  |
|                                             | 502300411         | ,000             | ,000  | ,000  |
|                                             | 502300415         | ,000             | ,000  | ,000  |
|                                             | 502300416         | ,000             | ,000  | ,000  |
|                                             | 502300811         | ,000             | ,000  | ,000  |
|                                             | 502300913         | ,000             | ,000  | ,000  |
| bv2 belastning vs paencil halva intervallet | 1 medelbelastning |                  |       |       |
|                                             | 2 underbelastning |                  |       |       |
|                                             | 3 överbelastning  |                  |       |       |

## Categorical Variables Codings

|                                             |                   | Parameter coding |       |       |
|---------------------------------------------|-------------------|------------------|-------|-------|
|                                             |                   | (9)              | (10)  | (11)  |
| VASTY2 (SAIR*10000)+VASTY                   | 403073101         | ,000             | ,000  | ,000  |
|                                             | 403073102         | ,000             | ,000  | ,000  |
|                                             | 403073103         | ,000             | ,000  | ,000  |
|                                             | 403073202         | ,000             | ,000  | ,000  |
|                                             | 403073203         | ,000             | ,000  | ,000  |
|                                             | 403073204         | ,000             | ,000  | ,000  |
|                                             | 403073303         | ,000             | ,000  | ,000  |
|                                             | 403073651         | ,000             | ,000  | ,000  |
|                                             | 403073771         | ,000             | ,000  | ,000  |
|                                             | 403133102         | 1,000            | ,000  | ,000  |
|                                             | 403133106         | ,000             | 1,000 | ,000  |
|                                             | 403133107         | ,000             | ,000  | 1,000 |
|                                             | 403133109         | ,000             | ,000  | ,000  |
|                                             | 403133202         | ,000             | ,000  | ,000  |
|                                             | 403133203         | ,000             | ,000  | ,000  |
|                                             | 403133204         | ,000             | ,000  | ,000  |
|                                             | 403133315         | ,000             | ,000  | ,000  |
|                                             | 403133322         | ,000             | ,000  | ,000  |
|                                             | 403133401         | ,000             | ,000  | ,000  |
|                                             | 403133402         | ,000             | ,000  | ,000  |
|                                             | 403133550         | ,000             | ,000  | ,000  |
|                                             | 403133772         | ,000             | ,000  | ,000  |
|                                             | 403135803         | ,000             | ,000  | ,000  |
|                                             | 404060001         | ,000             | ,000  | ,000  |
|                                             | 404060002         | ,000             | ,000  | ,000  |
|                                             | 404310003         | ,000             | ,000  | ,000  |
|                                             | 404310004         | ,000             | ,000  | ,000  |
|                                             | 502300005         | ,000             | ,000  | ,000  |
|                                             | 502300006         | ,000             | ,000  | ,000  |
|                                             | 502300007         | ,000             | ,000  | ,000  |
|                                             | 502300214         | ,000             | ,000  | ,000  |
|                                             | 502300411         | ,000             | ,000  | ,000  |
|                                             | 502300415         | ,000             | ,000  | ,000  |
|                                             | 502300416         | ,000             | ,000  | ,000  |
|                                             | 502300811         | ,000             | ,000  | ,000  |
|                                             | 502300913         | ,000             | ,000  | ,000  |
| bv2 belastning vs paoncil halva intervallet | 1 medelbelastning |                  |       |       |
|                                             | 2 underbelastning |                  |       |       |
|                                             | 3 överbelastning  |                  |       |       |

## Categorical Variables Codings

|                                             |                   | Parameter coding |       |       |
|---------------------------------------------|-------------------|------------------|-------|-------|
|                                             |                   | (12)             | (13)  | (14)  |
| VASTY2 (SAIR*10000)+VASTY                   | 403073101         | ,000             | ,000  | ,000  |
|                                             | 403073102         | ,000             | ,000  | ,000  |
|                                             | 403073103         | ,000             | ,000  | ,000  |
|                                             | 403073202         | ,000             | ,000  | ,000  |
|                                             | 403073203         | ,000             | ,000  | ,000  |
|                                             | 403073204         | ,000             | ,000  | ,000  |
|                                             | 403073303         | ,000             | ,000  | ,000  |
|                                             | 403073651         | ,000             | ,000  | ,000  |
|                                             | 403073771         | ,000             | ,000  | ,000  |
|                                             | 403133102         | ,000             | ,000  | ,000  |
|                                             | 403133106         | ,000             | ,000  | ,000  |
|                                             | 403133107         | ,000             | ,000  | ,000  |
|                                             | 403133109         | 1,000            | ,000  | ,000  |
|                                             | 403133202         | ,000             | 1,000 | ,000  |
|                                             | 403133203         | ,000             | ,000  | 1,000 |
|                                             | 403133204         | ,000             | ,000  | ,000  |
|                                             | 403133315         | ,000             | ,000  | ,000  |
|                                             | 403133322         | ,000             | ,000  | ,000  |
|                                             | 403133401         | ,000             | ,000  | ,000  |
|                                             | 403133402         | ,000             | ,000  | ,000  |
|                                             | 403133550         | ,000             | ,000  | ,000  |
|                                             | 403133772         | ,000             | ,000  | ,000  |
|                                             | 403135803         | ,000             | ,000  | ,000  |
|                                             | 404060001         | ,000             | ,000  | ,000  |
|                                             | 404060002         | ,000             | ,000  | ,000  |
|                                             | 404310003         | ,000             | ,000  | ,000  |
|                                             | 404310004         | ,000             | ,000  | ,000  |
|                                             | 502300005         | ,000             | ,000  | ,000  |
|                                             | 502300006         | ,000             | ,000  | ,000  |
|                                             | 502300007         | ,000             | ,000  | ,000  |
|                                             | 502300214         | ,000             | ,000  | ,000  |
|                                             | 502300411         | ,000             | ,000  | ,000  |
|                                             | 502300415         | ,000             | ,000  | ,000  |
|                                             | 502300416         | ,000             | ,000  | ,000  |
|                                             | 502300811         | ,000             | ,000  | ,000  |
|                                             | 502300913         | ,000             | ,000  | ,000  |
| bv2 belastning vs paoncil halva intervallet | 1 medelbelastning |                  |       |       |
|                                             | 2 underbelastning |                  |       |       |
|                                             | 3 överbelastning  |                  |       |       |

## Categorical Variables Codings

|                                             |                   | Parameter coding |       |       |
|---------------------------------------------|-------------------|------------------|-------|-------|
|                                             |                   | (15)             | (16)  | (17)  |
| VASTY2 (SAIR*10000)+VASTY                   | 403073101         | ,000             | ,000  | ,000  |
|                                             | 403073102         | ,000             | ,000  | ,000  |
|                                             | 403073103         | ,000             | ,000  | ,000  |
|                                             | 403073202         | ,000             | ,000  | ,000  |
|                                             | 403073203         | ,000             | ,000  | ,000  |
|                                             | 403073204         | ,000             | ,000  | ,000  |
|                                             | 403073303         | ,000             | ,000  | ,000  |
|                                             | 403073651         | ,000             | ,000  | ,000  |
|                                             | 403073771         | ,000             | ,000  | ,000  |
|                                             | 403133102         | ,000             | ,000  | ,000  |
|                                             | 403133106         | ,000             | ,000  | ,000  |
|                                             | 403133107         | ,000             | ,000  | ,000  |
|                                             | 403133109         | ,000             | ,000  | ,000  |
|                                             | 403133202         | ,000             | ,000  | ,000  |
|                                             | 403133203         | ,000             | ,000  | ,000  |
|                                             | 403133204         | 1,000            | ,000  | ,000  |
|                                             | 403133315         | ,000             | 1,000 | ,000  |
|                                             | 403133322         | ,000             | ,000  | 1,000 |
|                                             | 403133401         | ,000             | ,000  | ,000  |
|                                             | 403133402         | ,000             | ,000  | ,000  |
|                                             | 403133550         | ,000             | ,000  | ,000  |
|                                             | 403133772         | ,000             | ,000  | ,000  |
|                                             | 403135803         | ,000             | ,000  | ,000  |
|                                             | 404060001         | ,000             | ,000  | ,000  |
|                                             | 404060002         | ,000             | ,000  | ,000  |
|                                             | 404310003         | ,000             | ,000  | ,000  |
|                                             | 404310004         | ,000             | ,000  | ,000  |
|                                             | 502300005         | ,000             | ,000  | ,000  |
|                                             | 502300006         | ,000             | ,000  | ,000  |
|                                             | 502300007         | ,000             | ,000  | ,000  |
|                                             | 502300214         | ,000             | ,000  | ,000  |
|                                             | 502300411         | ,000             | ,000  | ,000  |
|                                             | 502300415         | ,000             | ,000  | ,000  |
|                                             | 502300416         | ,000             | ,000  | ,000  |
|                                             | 502300811         | ,000             | ,000  | ,000  |
|                                             | 502300913         | ,000             | ,000  | ,000  |
| bv2 belastning vs paoncil halva intervallet | 1 medelbelastning |                  |       |       |
|                                             | 2 underbelastning |                  |       |       |
|                                             | 3 överbelastning  |                  |       |       |

## Categorical Variables Codings

|                                             |                   | Parameter coding |       |       |
|---------------------------------------------|-------------------|------------------|-------|-------|
|                                             |                   | (18)             | (19)  | (20)  |
| VASTY2 (SAIR*10000)+VASTY                   | 403073101         | ,000             | ,000  | ,000  |
|                                             | 403073102         | ,000             | ,000  | ,000  |
|                                             | 403073103         | ,000             | ,000  | ,000  |
|                                             | 403073202         | ,000             | ,000  | ,000  |
|                                             | 403073203         | ,000             | ,000  | ,000  |
|                                             | 403073204         | ,000             | ,000  | ,000  |
|                                             | 403073303         | ,000             | ,000  | ,000  |
|                                             | 403073651         | ,000             | ,000  | ,000  |
|                                             | 403073771         | ,000             | ,000  | ,000  |
|                                             | 403133102         | ,000             | ,000  | ,000  |
|                                             | 403133106         | ,000             | ,000  | ,000  |
|                                             | 403133107         | ,000             | ,000  | ,000  |
|                                             | 403133109         | ,000             | ,000  | ,000  |
|                                             | 403133202         | ,000             | ,000  | ,000  |
|                                             | 403133203         | ,000             | ,000  | ,000  |
|                                             | 403133204         | ,000             | ,000  | ,000  |
|                                             | 403133315         | ,000             | ,000  | ,000  |
|                                             | 403133322         | ,000             | ,000  | ,000  |
|                                             | 403133401         | 1,000            | ,000  | ,000  |
|                                             | 403133402         | ,000             | 1,000 | ,000  |
|                                             | 403133550         | ,000             | ,000  | 1,000 |
|                                             | 403133772         | ,000             | ,000  | ,000  |
|                                             | 403135803         | ,000             | ,000  | ,000  |
|                                             | 404060001         | ,000             | ,000  | ,000  |
|                                             | 404060002         | ,000             | ,000  | ,000  |
|                                             | 404310003         | ,000             | ,000  | ,000  |
|                                             | 404310004         | ,000             | ,000  | ,000  |
|                                             | 502300005         | ,000             | ,000  | ,000  |
|                                             | 502300006         | ,000             | ,000  | ,000  |
|                                             | 502300007         | ,000             | ,000  | ,000  |
|                                             | 502300214         | ,000             | ,000  | ,000  |
|                                             | 502300411         | ,000             | ,000  | ,000  |
|                                             | 502300415         | ,000             | ,000  | ,000  |
|                                             | 502300416         | ,000             | ,000  | ,000  |
|                                             | 502300811         | ,000             | ,000  | ,000  |
|                                             | 502300913         | ,000             | ,000  | ,000  |
| bv2 belastning vs paoncil halva intervallet | 1 medelbelastning |                  |       |       |
|                                             | 2 underbelastning |                  |       |       |
|                                             | 3 överbelastning  |                  |       |       |



## Categorical Variables Codings

|                                             |                   | Parameter coding |       |       |
|---------------------------------------------|-------------------|------------------|-------|-------|
|                                             |                   | (21)             | (22)  | (23)  |
| VASTY2 (SAIR*10000)+VASTY                   | 403073101         | ,000             | ,000  | ,000  |
|                                             | 403073102         | ,000             | ,000  | ,000  |
|                                             | 403073103         | ,000             | ,000  | ,000  |
|                                             | 403073202         | ,000             | ,000  | ,000  |
|                                             | 403073203         | ,000             | ,000  | ,000  |
|                                             | 403073204         | ,000             | ,000  | ,000  |
|                                             | 403073303         | ,000             | ,000  | ,000  |
|                                             | 403073651         | ,000             | ,000  | ,000  |
|                                             | 403073771         | ,000             | ,000  | ,000  |
|                                             | 403133102         | ,000             | ,000  | ,000  |
|                                             | 403133106         | ,000             | ,000  | ,000  |
|                                             | 403133107         | ,000             | ,000  | ,000  |
|                                             | 403133109         | ,000             | ,000  | ,000  |
|                                             | 403133202         | ,000             | ,000  | ,000  |
|                                             | 403133203         | ,000             | ,000  | ,000  |
|                                             | 403133204         | ,000             | ,000  | ,000  |
|                                             | 403133315         | ,000             | ,000  | ,000  |
|                                             | 403133322         | ,000             | ,000  | ,000  |
|                                             | 403133401         | ,000             | ,000  | ,000  |
|                                             | 403133402         | ,000             | ,000  | ,000  |
|                                             | 403133550         | ,000             | ,000  | ,000  |
|                                             | 403133772         | 1,000            | ,000  | ,000  |
|                                             | 403135803         | ,000             | 1,000 | ,000  |
|                                             | 404060001         | ,000             | ,000  | 1,000 |
|                                             | 404060002         | ,000             | ,000  | ,000  |
|                                             | 404310003         | ,000             | ,000  | ,000  |
|                                             | 404310004         | ,000             | ,000  | ,000  |
|                                             | 502300005         | ,000             | ,000  | ,000  |
|                                             | 502300006         | ,000             | ,000  | ,000  |
|                                             | 502300007         | ,000             | ,000  | ,000  |
|                                             | 502300214         | ,000             | ,000  | ,000  |
|                                             | 502300411         | ,000             | ,000  | ,000  |
|                                             | 502300415         | ,000             | ,000  | ,000  |
|                                             | 502300416         | ,000             | ,000  | ,000  |
|                                             | 502300811         | ,000             | ,000  | ,000  |
|                                             | 502300913         | ,000             | ,000  | ,000  |
| bv2 belastning vs paencil halva intervallet | 1 medelbelastning |                  |       |       |
|                                             | 2 underbelastning |                  |       |       |
|                                             | 3 överbelastning  |                  |       |       |

## Categorical Variables Codings

|                                             |                   | Parameter coding |       |       |
|---------------------------------------------|-------------------|------------------|-------|-------|
|                                             |                   | (24)             | (25)  | (26)  |
| VASTY2 (SAIR*10000)+VASTY                   | 403073101         | ,000             | ,000  | ,000  |
|                                             | 403073102         | ,000             | ,000  | ,000  |
|                                             | 403073103         | ,000             | ,000  | ,000  |
|                                             | 403073202         | ,000             | ,000  | ,000  |
|                                             | 403073203         | ,000             | ,000  | ,000  |
|                                             | 403073204         | ,000             | ,000  | ,000  |
|                                             | 403073303         | ,000             | ,000  | ,000  |
|                                             | 403073651         | ,000             | ,000  | ,000  |
|                                             | 403073771         | ,000             | ,000  | ,000  |
|                                             | 403133102         | ,000             | ,000  | ,000  |
|                                             | 403133106         | ,000             | ,000  | ,000  |
|                                             | 403133107         | ,000             | ,000  | ,000  |
|                                             | 403133109         | ,000             | ,000  | ,000  |
|                                             | 403133202         | ,000             | ,000  | ,000  |
|                                             | 403133203         | ,000             | ,000  | ,000  |
|                                             | 403133204         | ,000             | ,000  | ,000  |
|                                             | 403133315         | ,000             | ,000  | ,000  |
|                                             | 403133322         | ,000             | ,000  | ,000  |
|                                             | 403133401         | ,000             | ,000  | ,000  |
|                                             | 403133402         | ,000             | ,000  | ,000  |
|                                             | 403133550         | ,000             | ,000  | ,000  |
|                                             | 403133772         | ,000             | ,000  | ,000  |
|                                             | 403135803         | ,000             | ,000  | ,000  |
|                                             | 404060001         | ,000             | ,000  | ,000  |
|                                             | 404060002         | 1,000            | ,000  | ,000  |
|                                             | 404310003         | ,000             | 1,000 | ,000  |
|                                             | 404310004         | ,000             | ,000  | 1,000 |
|                                             | 502300005         | ,000             | ,000  | ,000  |
|                                             | 502300006         | ,000             | ,000  | ,000  |
|                                             | 502300007         | ,000             | ,000  | ,000  |
|                                             | 502300214         | ,000             | ,000  | ,000  |
|                                             | 502300411         | ,000             | ,000  | ,000  |
|                                             | 502300415         | ,000             | ,000  | ,000  |
|                                             | 502300416         | ,000             | ,000  | ,000  |
|                                             | 502300811         | ,000             | ,000  | ,000  |
|                                             | 502300913         | ,000             | ,000  | ,000  |
| bv2 belastning vs paoncil halva intervallet | 1 medelbelastning |                  |       |       |
|                                             | 2 underbelastning |                  |       |       |
|                                             | 3 överbelastning  |                  |       |       |

## Categorical Variables Codings

|                                             |                   | Parameter coding |       |       |
|---------------------------------------------|-------------------|------------------|-------|-------|
|                                             |                   | (27)             | (28)  | (29)  |
| VASTY2 (SAIR*10000)+VASTY                   | 403073101         | ,000             | ,000  | ,000  |
|                                             | 403073102         | ,000             | ,000  | ,000  |
|                                             | 403073103         | ,000             | ,000  | ,000  |
|                                             | 403073202         | ,000             | ,000  | ,000  |
|                                             | 403073203         | ,000             | ,000  | ,000  |
|                                             | 403073204         | ,000             | ,000  | ,000  |
|                                             | 403073303         | ,000             | ,000  | ,000  |
|                                             | 403073651         | ,000             | ,000  | ,000  |
|                                             | 403073771         | ,000             | ,000  | ,000  |
|                                             | 403133102         | ,000             | ,000  | ,000  |
|                                             | 403133106         | ,000             | ,000  | ,000  |
|                                             | 403133107         | ,000             | ,000  | ,000  |
|                                             | 403133109         | ,000             | ,000  | ,000  |
|                                             | 403133202         | ,000             | ,000  | ,000  |
|                                             | 403133203         | ,000             | ,000  | ,000  |
|                                             | 403133204         | ,000             | ,000  | ,000  |
|                                             | 403133315         | ,000             | ,000  | ,000  |
|                                             | 403133322         | ,000             | ,000  | ,000  |
|                                             | 403133401         | ,000             | ,000  | ,000  |
|                                             | 403133402         | ,000             | ,000  | ,000  |
|                                             | 403133550         | ,000             | ,000  | ,000  |
|                                             | 403133772         | ,000             | ,000  | ,000  |
|                                             | 403135803         | ,000             | ,000  | ,000  |
|                                             | 404060001         | ,000             | ,000  | ,000  |
|                                             | 404060002         | ,000             | ,000  | ,000  |
|                                             | 404310003         | ,000             | ,000  | ,000  |
|                                             | 404310004         | ,000             | ,000  | ,000  |
|                                             | 502300005         | 1,000            | ,000  | ,000  |
|                                             | 502300006         | ,000             | 1,000 | ,000  |
|                                             | 502300007         | ,000             | ,000  | 1,000 |
|                                             | 502300214         | ,000             | ,000  | ,000  |
|                                             | 502300411         | ,000             | ,000  | ,000  |
|                                             | 502300415         | ,000             | ,000  | ,000  |
|                                             | 502300416         | ,000             | ,000  | ,000  |
|                                             | 502300811         | ,000             | ,000  | ,000  |
|                                             | 502300913         | ,000             | ,000  | ,000  |
| bv2 belastning vs paoncil halva intervallet | 1 medelbelastning |                  |       |       |
|                                             | 2 underbelastning |                  |       |       |
|                                             | 3 överbelastning  |                  |       |       |

## Categorical Variables Codings

|                                             |                   | Parameter coding |       |       |
|---------------------------------------------|-------------------|------------------|-------|-------|
|                                             |                   | (30)             | (31)  | (32)  |
| VASTY2 (SAIR*10000)+VASTY                   | 403073101         | ,000             | ,000  | ,000  |
|                                             | 403073102         | ,000             | ,000  | ,000  |
|                                             | 403073103         | ,000             | ,000  | ,000  |
|                                             | 403073202         | ,000             | ,000  | ,000  |
|                                             | 403073203         | ,000             | ,000  | ,000  |
|                                             | 403073204         | ,000             | ,000  | ,000  |
|                                             | 403073303         | ,000             | ,000  | ,000  |
|                                             | 403073651         | ,000             | ,000  | ,000  |
|                                             | 403073771         | ,000             | ,000  | ,000  |
|                                             | 403133102         | ,000             | ,000  | ,000  |
|                                             | 403133106         | ,000             | ,000  | ,000  |
|                                             | 403133107         | ,000             | ,000  | ,000  |
|                                             | 403133109         | ,000             | ,000  | ,000  |
|                                             | 403133202         | ,000             | ,000  | ,000  |
|                                             | 403133203         | ,000             | ,000  | ,000  |
|                                             | 403133204         | ,000             | ,000  | ,000  |
|                                             | 403133315         | ,000             | ,000  | ,000  |
|                                             | 403133322         | ,000             | ,000  | ,000  |
|                                             | 403133401         | ,000             | ,000  | ,000  |
|                                             | 403133402         | ,000             | ,000  | ,000  |
|                                             | 403133550         | ,000             | ,000  | ,000  |
|                                             | 403133772         | ,000             | ,000  | ,000  |
|                                             | 403135803         | ,000             | ,000  | ,000  |
|                                             | 404060001         | ,000             | ,000  | ,000  |
|                                             | 404060002         | ,000             | ,000  | ,000  |
|                                             | 404310003         | ,000             | ,000  | ,000  |
|                                             | 404310004         | ,000             | ,000  | ,000  |
|                                             | 502300005         | ,000             | ,000  | ,000  |
|                                             | 502300006         | ,000             | ,000  | ,000  |
|                                             | 502300007         | ,000             | ,000  | ,000  |
|                                             | 502300214         | 1,000            | ,000  | ,000  |
|                                             | 502300411         | ,000             | 1,000 | ,000  |
|                                             | 502300415         | ,000             | ,000  | 1,000 |
|                                             | 502300416         | ,000             | ,000  | ,000  |
|                                             | 502300811         | ,000             | ,000  | ,000  |
|                                             | 502300913         | ,000             | ,000  | ,000  |
| bv2 belastning vs paoncil halva intervallet | 1 medelbelastning |                  |       |       |
|                                             | 2 underbelastning |                  |       |       |
|                                             | 3 överbelastning  |                  |       |       |

## Categorical Variables Codings

|                                             |                   | Parameter coding |       |       |
|---------------------------------------------|-------------------|------------------|-------|-------|
|                                             |                   | (33)             | (34)  | (35)  |
| VASTY2 (SAIR*10000)+VASTY                   | 403073101         | ,000             | ,000  | ,000  |
|                                             | 403073102         | ,000             | ,000  | ,000  |
|                                             | 403073103         | ,000             | ,000  | ,000  |
|                                             | 403073202         | ,000             | ,000  | ,000  |
|                                             | 403073203         | ,000             | ,000  | ,000  |
|                                             | 403073204         | ,000             | ,000  | ,000  |
|                                             | 403073303         | ,000             | ,000  | ,000  |
|                                             | 403073651         | ,000             | ,000  | ,000  |
|                                             | 403073771         | ,000             | ,000  | ,000  |
|                                             | 403133102         | ,000             | ,000  | ,000  |
|                                             | 403133106         | ,000             | ,000  | ,000  |
|                                             | 403133107         | ,000             | ,000  | ,000  |
|                                             | 403133109         | ,000             | ,000  | ,000  |
|                                             | 403133202         | ,000             | ,000  | ,000  |
|                                             | 403133203         | ,000             | ,000  | ,000  |
|                                             | 403133204         | ,000             | ,000  | ,000  |
|                                             | 403133315         | ,000             | ,000  | ,000  |
|                                             | 403133322         | ,000             | ,000  | ,000  |
|                                             | 403133401         | ,000             | ,000  | ,000  |
|                                             | 403133402         | ,000             | ,000  | ,000  |
|                                             | 403133550         | ,000             | ,000  | ,000  |
|                                             | 403133772         | ,000             | ,000  | ,000  |
|                                             | 403135803         | ,000             | ,000  | ,000  |
|                                             | 404060001         | ,000             | ,000  | ,000  |
|                                             | 404060002         | ,000             | ,000  | ,000  |
|                                             | 404310003         | ,000             | ,000  | ,000  |
|                                             | 404310004         | ,000             | ,000  | ,000  |
|                                             | 502300005         | ,000             | ,000  | ,000  |
|                                             | 502300006         | ,000             | ,000  | ,000  |
|                                             | 502300007         | ,000             | ,000  | ,000  |
|                                             | 502300214         | ,000             | ,000  | ,000  |
|                                             | 502300411         | ,000             | ,000  | ,000  |
|                                             | 502300415         | ,000             | ,000  | ,000  |
|                                             | 502300416         | 1,000            | ,000  | ,000  |
|                                             | 502300811         | ,000             | 1,000 | ,000  |
|                                             | 502300913         | ,000             | ,000  | 1,000 |
| bv2 belastning vs paencil halva intervallet | 1 medelbelastning |                  |       |       |
|                                             | 2 underbelastning |                  |       |       |
|                                             | 3 överbelastning  |                  |       |       |

**Block 0: Beginning Block**

Classification Table<sup>a,b</sup>

| Observed           |                                |                           | Predicted                      |                      |
|--------------------|--------------------------------|---------------------------|--------------------------------|----------------------|
|                    |                                |                           | handlt1 händelse larger than 1 |                      |
|                    |                                |                           | 0 ingen eller en händelse      | 1 mer än en händelse |
| Step 0             | handlt1 händelse larger than 1 | 0 ingen eller en händelse | 12229                          | 0                    |
|                    |                                | 1 mer än en händelse      | 246                            | 0                    |
| Overall Percentage |                                |                           |                                |                      |

Classification Table<sup>a,b</sup>

| Observed           |                                |                           | Predicted          |
|--------------------|--------------------------------|---------------------------|--------------------|
|                    |                                |                           | Percentage Correct |
| Step 0             | handlt1 händelse larger than 1 | 0 ingen eller en händelse | 100,0              |
|                    |                                | 1 mer än en händelse      | ,0                 |
| Overall Percentage |                                |                           | 98,0               |

a. Constant is included in the model.

b. The cut value is ,500

Variables in the Equation

|                 | B      | S.E. | Wald     | df | Sig. | Exp(B) |
|-----------------|--------|------|----------|----|------|--------|
| Step 0 Constant | -3,906 | ,064 | 3679,612 | 1  | ,000 | ,020   |

## Variables not in the Equation

|        |                    | Score   | df | Sig. |
|--------|--------------------|---------|----|------|
| Step 0 | Variables          |         |    |      |
|        | bv2                | 9,226   | 2  | ,010 |
|        | bv2(1)             | 8,102   | 1  | ,004 |
|        | bv2(2)             | 6,880   | 1  | ,009 |
|        | VASTY2             | 211,294 | 35 | ,000 |
|        | VASTY2(1)          | ,109    | 1  | ,741 |
|        | VASTY2(2)          | 2,111   | 1  | ,146 |
|        | VASTY2(3)          | 5,608   | 1  | ,018 |
|        | VASTY2(4)          | ,094    | 1  | ,759 |
|        | VASTY2(5)          | 1,981   | 1  | ,159 |
|        | VASTY2(6)          | 7,542   | 1  | ,006 |
|        | VASTY2(7)          | 3,478   | 1  | ,062 |
|        | VASTY2(8)          | ,006    | 1  | ,940 |
|        | VASTY2(9)          | ,082    | 1  | ,775 |
|        | VASTY2(10)         | 36,459  | 1  | ,000 |
|        | VASTY2(11)         | 27,814  | 1  | ,000 |
|        | VASTY2(12)         | 2,573   | 1  | ,109 |
|        | VASTY2(13)         | ,705    | 1  | ,401 |
|        | VASTY2(14)         | ,209    | 1  | ,647 |
|        | VASTY2(15)         | ,209    | 1  | ,647 |
|        | VASTY2(16)         | ,071    | 1  | ,789 |
|        | VASTY2(17)         | 7,564   | 1  | ,006 |
|        | VASTY2(18)         | 7,500   | 1  | ,006 |
|        | VASTY2(19)         | 5,608   | 1  | ,018 |
|        | VASTY2(20)         | 1,471   | 1  | ,225 |
|        | VASTY2(21)         | 2,573   | 1  | ,109 |
|        | VASTY2(22)         | ,474    | 1  | ,491 |
|        | VASTY2(23)         | 41,219  | 1  | ,000 |
|        | VASTY2(24)         | 20,216  | 1  | ,000 |
|        | VASTY2(25)         | ,290    | 1  | ,590 |
|        | VASTY2(26)         | ,550    | 1  | ,458 |
|        | VASTY2(27)         | 5,629   | 1  | ,018 |
|        | VASTY2(28)         | 2,766   | 1  | ,096 |
|        | VASTY2(29)         | 7,585   | 1  | ,006 |
|        | VASTY2(30)         | ,089    | 1  | ,765 |
|        | VASTY2(31)         | 8,820   | 1  | ,003 |
|        | VASTY2(32)         | ,652    | 1  | ,419 |
|        | VASTY2(33)         | 1,464   | 1  | ,226 |
|        | VASTY2(34)         | 5,587   | 1  | ,018 |
|        | VASTY2(35)         | 7,764   | 1  | ,005 |
|        | Overall Statistics | 219,794 | 37 | ,000 |

**Block 1: Method = Enter**

## Omnibus Tests of Model Coefficients

|        |       | Chi-square | df | Sig. |
|--------|-------|------------|----|------|
| Step 1 | Step  | 217,446    | 37 | ,000 |
|        | Block | 217,446    | 37 | ,000 |
|        | Model | 217,446    | 37 | ,000 |

## Model Summary

| Step | -2 Log likelihood     | Cox & Snell R Square | Nagelkerke R Square |
|------|-----------------------|----------------------|---------------------|
| 1    | 2201,337 <sup>a</sup> | ,017                 | ,098                |

a. Estimation terminated at iteration number 20 because maximum iterations has been reached. Final solution cannot be found.

Classification Table<sup>a</sup>

|                    |                                |                           | Predicted                 |                      |
|--------------------|--------------------------------|---------------------------|---------------------------|----------------------|
|                    |                                |                           | 0 ingen eller en händelse | 1 mer än en händelse |
|                    | Observed                       |                           |                           |                      |
| Step 1             | handlt1 händelse larger than 1 | 0 ingen eller en händelse | 12229                     | 0                    |
|                    |                                | 1 mer än en händelse      | 246                       | 0                    |
| Overall Percentage |                                |                           |                           |                      |

Classification Table<sup>a</sup>

|                    |                                |                           | Predicted          |
|--------------------|--------------------------------|---------------------------|--------------------|
|                    |                                |                           | Percentage Correct |
|                    | Observed                       |                           |                    |
| Step 1             | handlt1 händelse larger than 1 | 0 ingen eller en händelse | 100,0              |
|                    |                                | 1 mer än en händelse      | ,0                 |
| Overall Percentage |                                |                           | 98,0               |

a. The cut value is ,500



## Variables in the Equation

|                         | B       | S.E.     | Wald    | df | Sig. | Exp(B) |
|-------------------------|---------|----------|---------|----|------|--------|
| Step 1 <sup>a</sup> bv2 |         |          | 8,427   | 2  | ,015 |        |
| bv2(1)                  | -,248   | ,188     | 1,736   | 1  | ,188 | ,780   |
| bv2(2)                  | ,231    | ,170     | 1,847   | 1  | ,174 | 1,260  |
| VASTY2                  |         |          | 120,796 | 35 | ,000 |        |
| VASTY2(1)               | ,455    | ,575     | ,627    | 1  | ,429 | 1,577  |
| VASTY2(2)               | ,741    | ,545     | 1,845   | 1  | ,174 | 2,097  |
| VASTY2(3)               | -1,802  | 1,100    | 2,684   | 1  | ,101 | ,165   |
| VASTY2(4)               | ,330    | ,578     | ,327    | 1  | ,567 | 1,391  |
| VASTY2(5)               | -,493   | ,735     | ,450    | 1  | ,502 | ,611   |
| VASTY2(6)               | -17,032 | 2101,796 | ,000    | 1  | ,994 | ,000   |
| VASTY2(7)               | ,708    | ,543     | 1,701   | 1  | ,192 | 2,030  |
| VASTY2(8)               | ,231    | ,592     | ,153    | 1  | ,696 | 1,260  |
| VASTY2(9)               | ,136    | ,612     | ,050    | 1  | ,824 | 1,146  |
| VASTY2(10)              | 1,486   | ,500     | 8,827   | 1  | ,003 | 4,421  |
| VASTY2(11)              | 1,443   | ,504     | 8,206   | 1  | ,004 | 4,234  |
| VASTY2(12)              | -,610   | ,735     | ,689    | 1  | ,406 | ,543   |
| VASTY2(13)              | -,185   | ,640     | ,084    | 1  | ,772 | ,831   |
| VASTY2(14)              | ,079    | ,612     | ,017    | 1  | ,898 | 1,082  |
| VASTY2(15)              | ,098    | ,611     | ,026    | 1  | ,872 | 1,103  |
| VASTY2(16)              | ,182    | ,737     | ,061    | 1  | ,805 | 1,199  |
| VASTY2(17)              | -16,892 | 2098,459 | ,000    | 1  | ,994 | ,000   |
| VASTY2(18)              | -16,938 | 2106,705 | ,000    | 1  | ,994 | ,000   |
| VASTY2(19)              | -1,413  | 1,102    | 1,644   | 1  | ,200 | ,243   |
| VASTY2(20)              | -,412   | ,736     | ,313    | 1  | ,576 | ,662   |
| VASTY2(21)              | -,575   | ,735     | ,614    | 1  | ,433 | ,562   |
| VASTY2(22)              | ,730    | ,565     | 1,667   | 1  | ,197 | 2,074  |
| VASTY2(23)              | 1,641   | ,498     | 10,875  | 1  | ,001 | 5,161  |
| VASTY2(24)              | 1,230   | ,511     | 5,786   | 1  | ,016 | 3,420  |
| VASTY2(25)              | ,594    | ,591     | 1,011   | 1  | ,315 | 1,812  |
| VASTY2(26)              | -,088   | ,677     | ,017    | 1  | ,897 | ,916   |
| VASTY2(27)              | -1,742  | 1,099    | 2,512   | 1  | ,113 | ,175   |
| VASTY2(28)              | -1,289  | 1,100    | 1,372   | 1  | ,241 | ,276   |
| VASTY2(29)              | -16,985 | 2096,165 | ,000    | 1  | ,994 | ,000   |
| VASTY2(30)              | ,418    | ,576     | ,526    | 1  | ,468 | 1,518  |
| VASTY2(31)              | 1,095   | ,523     | 4,379   | 1  | ,036 | 2,989  |
| VASTY2(32)              | ,045    | ,638     | ,005    | 1  | ,944 | 1,046  |
| VASTY2(33)              | -,206   | ,676     | ,093    | 1  | ,760 | ,813   |
| VASTY2(34)              | -1,654  | 1,098    | 2,268   | 1  | ,132 | ,191   |
| VASTY2(35)              | ,998    | ,535     | 3,475   | 1  | ,062 | 2,713  |
| Constant                | -4,243  | ,463     | 84,086  | 1  | ,000 | ,014   |

## Variables in the Equation

|                     |            | 95% C.I. for EXP(B) |        |
|---------------------|------------|---------------------|--------|
|                     |            | Lower               | Upper  |
| Step 1 <sup>a</sup> | bv2        |                     |        |
|                     | bv2(1)     | ,539                | 1,129  |
|                     | bv2(2)     | ,903                | 1,759  |
|                     | VASTY2     |                     |        |
|                     | VASTY2(1)  | ,511                | 4,870  |
|                     | VASTY2(2)  | ,720                | 6,105  |
|                     | VASTY2(3)  | ,019                | 1,425  |
|                     | VASTY2(4)  | ,449                | 4,316  |
|                     | VASTY2(5)  | ,145                | 2,579  |
|                     | VASTY2(6)  | ,000                | .      |
|                     | VASTY2(7)  | ,701                | 5,880  |
|                     | VASTY2(8)  | ,395                | 4,019  |
|                     | VASTY2(9)  | ,345                | 3,803  |
|                     | VASTY2(10) | 1,658               | 11,786 |
|                     | VASTY2(11) | 1,577               | 11,365 |
|                     | VASTY2(12) | ,129                | 2,294  |
|                     | VASTY2(13) | ,237                | 2,913  |
|                     | VASTY2(14) | ,326                | 3,587  |
|                     | VASTY2(15) | ,333                | 3,654  |
|                     | VASTY2(16) | ,283                | 5,084  |
|                     | VASTY2(17) | ,000                | .      |
|                     | VASTY2(18) | ,000                | .      |
|                     | VASTY2(19) | ,028                | 2,110  |
|                     | VASTY2(20) | ,157                | 2,803  |
|                     | VASTY2(21) | ,133                | 2,374  |
|                     | VASTY2(22) | ,685                | 6,278  |
|                     | VASTY2(23) | 1,946               | 13,690 |
|                     | VASTY2(24) | 1,256               | 9,316  |
|                     | VASTY2(25) | ,569                | 5,771  |
|                     | VASTY2(26) | ,243                | 3,451  |
|                     | VASTY2(27) | ,020                | 1,510  |
|                     | VASTY2(28) | ,032                | 2,381  |
|                     | VASTY2(29) | ,000                | .      |
|                     | VASTY2(30) | ,491                | 4,691  |
|                     | VASTY2(31) | 1,072               | 8,336  |
|                     | VASTY2(32) | ,300                | 3,652  |
|                     | VASTY2(33) | ,216                | 3,057  |
|                     | VASTY2(34) | ,022                | 1,646  |
|                     | VASTY2(35) | ,950                | 7,745  |
|                     | Constant   |                     |        |

a. Variable(s) entered on step 1: bv2, VASTY2.

```

1
2
3 LOGISTIC REGRESSION VARIABLES handlt1
4   /METHOD=ENTER bv3 VASTY2
5   /CONTRAST (bv3)=Indicator(1)
6   /CONTRAST (VASTY2)=Indicator(1)
7   /PRINT=CI(95)
8   /CRITERIA=PIN(0.05) POUT(0.10) ITERATE(20) CUT(0.5).
9

```

## Logistic Regression

[DataSet6] C:\cWordjan\Rafaela\_VCS\alla\_tillsammans\abo\_bjo\_vasa\_v1.sav

### Case Processing Summary

| Unweighted Cases <sup>a</sup> |                      | N     | Percent |
|-------------------------------|----------------------|-------|---------|
| Selected Cases                | Included in Analysis | 12475 | 100,0   |
|                               | Missing Cases        | 0     | ,0      |
|                               | Total                | 12475 | 100,0   |
| Unselected Cases              |                      | 0     | ,0      |
| Total                         |                      | 12475 | 100,0   |

a. If weight is in effect, see classification table for the total number of cases.

### Dependent Variable Encoding

| Original Value            | Internal Value |
|---------------------------|----------------|
| 0 ingen eller en händelse | 0              |
| 1 mer än en händelse      | 1              |

## Categorical Variables Codings

|                                              |                   | Frequency | Parameter coding |       |
|----------------------------------------------|-------------------|-----------|------------------|-------|
|                                              |                   |           | (1)              | (2)   |
| VASTY2 (SAIR*10000)+VASTY                    | 403073101         | 365       | ,000             | ,000  |
|                                              | 403073102         | 362       | 1,000            | ,000  |
|                                              | 403073103         | 365       | ,000             | 1,000 |
|                                              | 403073202         | 365       | ,000             | ,000  |
|                                              | 403073203         | 365       | ,000             | ,000  |
|                                              | 403073204         | 330       | ,000             | ,000  |
|                                              | 403073303         | 364       | ,000             | ,000  |
|                                              | 403073651         | 362       | ,000             | ,000  |
|                                              | 403073771         | 365       | ,000             | ,000  |
|                                              | 403133102         | 341       | ,000             | ,000  |
|                                              | 403133106         | 365       | ,000             | ,000  |
|                                              | 403133107         | 365       | ,000             | ,000  |
|                                              | 403133109         | 365       | ,000             | ,000  |
|                                              | 403133202         | 365       | ,000             | ,000  |
|                                              | 403133203         | 365       | ,000             | ,000  |
|                                              | 403133204         | 365       | ,000             | ,000  |
|                                              | 403133315         | 177       | ,000             | ,000  |
|                                              | 403133322         | 365       | ,000             | ,000  |
|                                              | 403133401         | 362       | ,000             | ,000  |
|                                              | 403133402         | 365       | ,000             | ,000  |
|                                              | 403133550         | 298       | ,000             | ,000  |
|                                              | 403133772         | 365       | ,000             | ,000  |
|                                              | 403135803         | 365       | ,000             | ,000  |
|                                              | 404060001         | 365       | ,000             | ,000  |
|                                              | 404060002         | 366       | ,000             | ,000  |
|                                              | 404310003         | 291       | ,000             | ,000  |
|                                              | 404310004         | 291       | ,000             | ,000  |
|                                              | 502300005         | 366       | ,000             | ,000  |
|                                              | 502300006         | 225       | ,000             | ,000  |
|                                              | 502300007         | 366       | ,000             | ,000  |
|                                              | 502300214         | 366       | ,000             | ,000  |
|                                              | 502300411         | 366       | ,000             | ,000  |
|                                              | 502300415         | 360       | ,000             | ,000  |
|                                              | 502300416         | 363       | ,000             | ,000  |
|                                              | 502300811         | 364       | ,000             | ,000  |
|                                              | 502300913         | 315       | ,000             | ,000  |
| bv3 belasnting vs paoncil dubbla intervallet | 1 medelbelastning | 9121      | ,000             | ,000  |
|                                              | 2 underbelastning | 1505      | 1,000            | ,000  |
|                                              | 3 överbelastning  | 1849      | ,000             | 1,000 |

## Categorical Variables Codings

|                                              |                   | Parameter coding |       |       |
|----------------------------------------------|-------------------|------------------|-------|-------|
|                                              |                   | (3)              | (4)   | (5)   |
| VASTY2 (SAIR*10000)+VASTY                    | 403073101         | ,000             | ,000  | ,000  |
|                                              | 403073102         | ,000             | ,000  | ,000  |
|                                              | 403073103         | ,000             | ,000  | ,000  |
|                                              | 403073202         | 1,000            | ,000  | ,000  |
|                                              | 403073203         | ,000             | 1,000 | ,000  |
|                                              | 403073204         | ,000             | ,000  | 1,000 |
|                                              | 403073303         | ,000             | ,000  | ,000  |
|                                              | 403073651         | ,000             | ,000  | ,000  |
|                                              | 403073771         | ,000             | ,000  | ,000  |
|                                              | 403133102         | ,000             | ,000  | ,000  |
|                                              | 403133106         | ,000             | ,000  | ,000  |
|                                              | 403133107         | ,000             | ,000  | ,000  |
|                                              | 403133109         | ,000             | ,000  | ,000  |
|                                              | 403133202         | ,000             | ,000  | ,000  |
|                                              | 403133203         | ,000             | ,000  | ,000  |
|                                              | 403133204         | ,000             | ,000  | ,000  |
|                                              | 403133315         | ,000             | ,000  | ,000  |
|                                              | 403133322         | ,000             | ,000  | ,000  |
|                                              | 403133401         | ,000             | ,000  | ,000  |
|                                              | 403133402         | ,000             | ,000  | ,000  |
|                                              | 403133550         | ,000             | ,000  | ,000  |
|                                              | 403133772         | ,000             | ,000  | ,000  |
|                                              | 403135803         | ,000             | ,000  | ,000  |
|                                              | 404060001         | ,000             | ,000  | ,000  |
|                                              | 404060002         | ,000             | ,000  | ,000  |
|                                              | 404310003         | ,000             | ,000  | ,000  |
|                                              | 404310004         | ,000             | ,000  | ,000  |
|                                              | 502300005         | ,000             | ,000  | ,000  |
|                                              | 502300006         | ,000             | ,000  | ,000  |
|                                              | 502300007         | ,000             | ,000  | ,000  |
|                                              | 502300214         | ,000             | ,000  | ,000  |
|                                              | 502300411         | ,000             | ,000  | ,000  |
|                                              | 502300415         | ,000             | ,000  | ,000  |
|                                              | 502300416         | ,000             | ,000  | ,000  |
|                                              | 502300811         | ,000             | ,000  | ,000  |
|                                              | 502300913         | ,000             | ,000  | ,000  |
| bv3 belasnting vs paoncil dubbla intervallet | 1 medelbelastning |                  |       |       |
|                                              | 2 underbelastning |                  |       |       |
|                                              | 3 överbelastning  |                  |       |       |

## Categorical Variables Codings

|                                              |                   | Parameter coding |       |       |
|----------------------------------------------|-------------------|------------------|-------|-------|
|                                              |                   | (6)              | (7)   | (8)   |
| VASTY2 (SAIR*10000)+VASTY                    | 403073101         | ,000             | ,000  | ,000  |
|                                              | 403073102         | ,000             | ,000  | ,000  |
|                                              | 403073103         | ,000             | ,000  | ,000  |
|                                              | 403073202         | ,000             | ,000  | ,000  |
|                                              | 403073203         | ,000             | ,000  | ,000  |
|                                              | 403073204         | ,000             | ,000  | ,000  |
|                                              | 403073303         | 1,000            | ,000  | ,000  |
|                                              | 403073651         | ,000             | 1,000 | ,000  |
|                                              | 403073771         | ,000             | ,000  | 1,000 |
|                                              | 403133102         | ,000             | ,000  | ,000  |
|                                              | 403133106         | ,000             | ,000  | ,000  |
|                                              | 403133107         | ,000             | ,000  | ,000  |
|                                              | 403133109         | ,000             | ,000  | ,000  |
|                                              | 403133202         | ,000             | ,000  | ,000  |
|                                              | 403133203         | ,000             | ,000  | ,000  |
|                                              | 403133204         | ,000             | ,000  | ,000  |
|                                              | 403133315         | ,000             | ,000  | ,000  |
|                                              | 403133322         | ,000             | ,000  | ,000  |
|                                              | 403133401         | ,000             | ,000  | ,000  |
|                                              | 403133402         | ,000             | ,000  | ,000  |
|                                              | 403133550         | ,000             | ,000  | ,000  |
|                                              | 403133772         | ,000             | ,000  | ,000  |
|                                              | 403135803         | ,000             | ,000  | ,000  |
|                                              | 404060001         | ,000             | ,000  | ,000  |
|                                              | 404060002         | ,000             | ,000  | ,000  |
|                                              | 404310003         | ,000             | ,000  | ,000  |
|                                              | 404310004         | ,000             | ,000  | ,000  |
|                                              | 502300005         | ,000             | ,000  | ,000  |
|                                              | 502300006         | ,000             | ,000  | ,000  |
|                                              | 502300007         | ,000             | ,000  | ,000  |
|                                              | 502300214         | ,000             | ,000  | ,000  |
|                                              | 502300411         | ,000             | ,000  | ,000  |
|                                              | 502300415         | ,000             | ,000  | ,000  |
|                                              | 502300416         | ,000             | ,000  | ,000  |
|                                              | 502300811         | ,000             | ,000  | ,000  |
|                                              | 502300913         | ,000             | ,000  | ,000  |
| bv3 belasnting vs paoncil dubbla intervallet | 1 medelbelastning |                  |       |       |
|                                              | 2 underbelastning |                  |       |       |
|                                              | 3 överbelastning  |                  |       |       |

## Categorical Variables Codings

|                                              |                   | Parameter coding |       |       |
|----------------------------------------------|-------------------|------------------|-------|-------|
|                                              |                   | (9)              | (10)  | (11)  |
| VASTY2 (SAIR*10000)+VASTY                    | 403073101         | ,000             | ,000  | ,000  |
|                                              | 403073102         | ,000             | ,000  | ,000  |
|                                              | 403073103         | ,000             | ,000  | ,000  |
|                                              | 403073202         | ,000             | ,000  | ,000  |
|                                              | 403073203         | ,000             | ,000  | ,000  |
|                                              | 403073204         | ,000             | ,000  | ,000  |
|                                              | 403073303         | ,000             | ,000  | ,000  |
|                                              | 403073651         | ,000             | ,000  | ,000  |
|                                              | 403073771         | ,000             | ,000  | ,000  |
|                                              | 403133102         | 1,000            | ,000  | ,000  |
|                                              | 403133106         | ,000             | 1,000 | ,000  |
|                                              | 403133107         | ,000             | ,000  | 1,000 |
|                                              | 403133109         | ,000             | ,000  | ,000  |
|                                              | 403133202         | ,000             | ,000  | ,000  |
|                                              | 403133203         | ,000             | ,000  | ,000  |
|                                              | 403133204         | ,000             | ,000  | ,000  |
|                                              | 403133315         | ,000             | ,000  | ,000  |
|                                              | 403133322         | ,000             | ,000  | ,000  |
|                                              | 403133401         | ,000             | ,000  | ,000  |
|                                              | 403133402         | ,000             | ,000  | ,000  |
|                                              | 403133550         | ,000             | ,000  | ,000  |
|                                              | 403133772         | ,000             | ,000  | ,000  |
|                                              | 403135803         | ,000             | ,000  | ,000  |
|                                              | 404060001         | ,000             | ,000  | ,000  |
|                                              | 404060002         | ,000             | ,000  | ,000  |
|                                              | 404310003         | ,000             | ,000  | ,000  |
|                                              | 404310004         | ,000             | ,000  | ,000  |
|                                              | 502300005         | ,000             | ,000  | ,000  |
|                                              | 502300006         | ,000             | ,000  | ,000  |
|                                              | 502300007         | ,000             | ,000  | ,000  |
|                                              | 502300214         | ,000             | ,000  | ,000  |
|                                              | 502300411         | ,000             | ,000  | ,000  |
|                                              | 502300415         | ,000             | ,000  | ,000  |
|                                              | 502300416         | ,000             | ,000  | ,000  |
|                                              | 502300811         | ,000             | ,000  | ,000  |
|                                              | 502300913         | ,000             | ,000  | ,000  |
| bv3 belasnting vs paoncil dubbla intervallet | 1 medelbelastning |                  |       |       |
|                                              | 2 underbelastning |                  |       |       |
|                                              | 3 överbelastning  |                  |       |       |

## Categorical Variables Codings

|                                              |                   | Parameter coding |       |       |
|----------------------------------------------|-------------------|------------------|-------|-------|
|                                              |                   | (12)             | (13)  | (14)  |
| VASTY2 (SAIR*10000)+VASTY                    | 403073101         | ,000             | ,000  | ,000  |
|                                              | 403073102         | ,000             | ,000  | ,000  |
|                                              | 403073103         | ,000             | ,000  | ,000  |
|                                              | 403073202         | ,000             | ,000  | ,000  |
|                                              | 403073203         | ,000             | ,000  | ,000  |
|                                              | 403073204         | ,000             | ,000  | ,000  |
|                                              | 403073303         | ,000             | ,000  | ,000  |
|                                              | 403073651         | ,000             | ,000  | ,000  |
|                                              | 403073771         | ,000             | ,000  | ,000  |
|                                              | 403133102         | ,000             | ,000  | ,000  |
|                                              | 403133106         | ,000             | ,000  | ,000  |
|                                              | 403133107         | ,000             | ,000  | ,000  |
|                                              | 403133109         | 1,000            | ,000  | ,000  |
|                                              | 403133202         | ,000             | 1,000 | ,000  |
|                                              | 403133203         | ,000             | ,000  | 1,000 |
|                                              | 403133204         | ,000             | ,000  | ,000  |
|                                              | 403133315         | ,000             | ,000  | ,000  |
|                                              | 403133322         | ,000             | ,000  | ,000  |
|                                              | 403133401         | ,000             | ,000  | ,000  |
|                                              | 403133402         | ,000             | ,000  | ,000  |
|                                              | 403133550         | ,000             | ,000  | ,000  |
|                                              | 403133772         | ,000             | ,000  | ,000  |
|                                              | 403135803         | ,000             | ,000  | ,000  |
|                                              | 404060001         | ,000             | ,000  | ,000  |
|                                              | 404060002         | ,000             | ,000  | ,000  |
|                                              | 404310003         | ,000             | ,000  | ,000  |
|                                              | 404310004         | ,000             | ,000  | ,000  |
|                                              | 502300005         | ,000             | ,000  | ,000  |
|                                              | 502300006         | ,000             | ,000  | ,000  |
|                                              | 502300007         | ,000             | ,000  | ,000  |
|                                              | 502300214         | ,000             | ,000  | ,000  |
|                                              | 502300411         | ,000             | ,000  | ,000  |
|                                              | 502300415         | ,000             | ,000  | ,000  |
|                                              | 502300416         | ,000             | ,000  | ,000  |
|                                              | 502300811         | ,000             | ,000  | ,000  |
|                                              | 502300913         | ,000             | ,000  | ,000  |
| bv3 belasnting vs paoncil dubbla intervallet | 1 medelbelastning |                  |       |       |
|                                              | 2 underbelastning |                  |       |       |
|                                              | 3 överbelastning  |                  |       |       |



## Categorical Variables Codings

|                                              |                   | Parameter coding |       |       |
|----------------------------------------------|-------------------|------------------|-------|-------|
|                                              |                   | (15)             | (16)  | (17)  |
| VASTY2 (SAIR*10000)+VASTY                    | 403073101         | ,000             | ,000  | ,000  |
|                                              | 403073102         | ,000             | ,000  | ,000  |
|                                              | 403073103         | ,000             | ,000  | ,000  |
|                                              | 403073202         | ,000             | ,000  | ,000  |
|                                              | 403073203         | ,000             | ,000  | ,000  |
|                                              | 403073204         | ,000             | ,000  | ,000  |
|                                              | 403073303         | ,000             | ,000  | ,000  |
|                                              | 403073651         | ,000             | ,000  | ,000  |
|                                              | 403073771         | ,000             | ,000  | ,000  |
|                                              | 403133102         | ,000             | ,000  | ,000  |
|                                              | 403133106         | ,000             | ,000  | ,000  |
|                                              | 403133107         | ,000             | ,000  | ,000  |
|                                              | 403133109         | ,000             | ,000  | ,000  |
|                                              | 403133202         | ,000             | ,000  | ,000  |
|                                              | 403133203         | ,000             | ,000  | ,000  |
|                                              | 403133204         | 1,000            | ,000  | ,000  |
|                                              | 403133315         | ,000             | 1,000 | ,000  |
|                                              | 403133322         | ,000             | ,000  | 1,000 |
|                                              | 403133401         | ,000             | ,000  | ,000  |
|                                              | 403133402         | ,000             | ,000  | ,000  |
|                                              | 403133550         | ,000             | ,000  | ,000  |
|                                              | 403133772         | ,000             | ,000  | ,000  |
|                                              | 403135803         | ,000             | ,000  | ,000  |
|                                              | 404060001         | ,000             | ,000  | ,000  |
|                                              | 404060002         | ,000             | ,000  | ,000  |
|                                              | 404310003         | ,000             | ,000  | ,000  |
|                                              | 404310004         | ,000             | ,000  | ,000  |
|                                              | 502300005         | ,000             | ,000  | ,000  |
|                                              | 502300006         | ,000             | ,000  | ,000  |
|                                              | 502300007         | ,000             | ,000  | ,000  |
|                                              | 502300214         | ,000             | ,000  | ,000  |
|                                              | 502300411         | ,000             | ,000  | ,000  |
|                                              | 502300415         | ,000             | ,000  | ,000  |
|                                              | 502300416         | ,000             | ,000  | ,000  |
|                                              | 502300811         | ,000             | ,000  | ,000  |
|                                              | 502300913         | ,000             | ,000  | ,000  |
| bv3 belasnting vs paoncil dubbla intervallet | 1 medelbelastning |                  |       |       |
|                                              | 2 underbelastning |                  |       |       |
|                                              | 3 överbelastning  |                  |       |       |

## Categorical Variables Codings

|                                              |                   | Parameter coding |       |       |
|----------------------------------------------|-------------------|------------------|-------|-------|
|                                              |                   | (18)             | (19)  | (20)  |
| VASTY2 (SAIR*10000)+VASTY                    | 403073101         | ,000             | ,000  | ,000  |
|                                              | 403073102         | ,000             | ,000  | ,000  |
|                                              | 403073103         | ,000             | ,000  | ,000  |
|                                              | 403073202         | ,000             | ,000  | ,000  |
|                                              | 403073203         | ,000             | ,000  | ,000  |
|                                              | 403073204         | ,000             | ,000  | ,000  |
|                                              | 403073303         | ,000             | ,000  | ,000  |
|                                              | 403073651         | ,000             | ,000  | ,000  |
|                                              | 403073771         | ,000             | ,000  | ,000  |
|                                              | 403133102         | ,000             | ,000  | ,000  |
|                                              | 403133106         | ,000             | ,000  | ,000  |
|                                              | 403133107         | ,000             | ,000  | ,000  |
|                                              | 403133109         | ,000             | ,000  | ,000  |
|                                              | 403133202         | ,000             | ,000  | ,000  |
|                                              | 403133203         | ,000             | ,000  | ,000  |
|                                              | 403133204         | ,000             | ,000  | ,000  |
|                                              | 403133315         | ,000             | ,000  | ,000  |
|                                              | 403133322         | ,000             | ,000  | ,000  |
|                                              | 403133401         | 1,000            | ,000  | ,000  |
|                                              | 403133402         | ,000             | 1,000 | ,000  |
|                                              | 403133550         | ,000             | ,000  | 1,000 |
|                                              | 403133772         | ,000             | ,000  | ,000  |
|                                              | 403135803         | ,000             | ,000  | ,000  |
|                                              | 404060001         | ,000             | ,000  | ,000  |
|                                              | 404060002         | ,000             | ,000  | ,000  |
|                                              | 404310003         | ,000             | ,000  | ,000  |
|                                              | 404310004         | ,000             | ,000  | ,000  |
|                                              | 502300005         | ,000             | ,000  | ,000  |
|                                              | 502300006         | ,000             | ,000  | ,000  |
|                                              | 502300007         | ,000             | ,000  | ,000  |
|                                              | 502300214         | ,000             | ,000  | ,000  |
|                                              | 502300411         | ,000             | ,000  | ,000  |
|                                              | 502300415         | ,000             | ,000  | ,000  |
|                                              | 502300416         | ,000             | ,000  | ,000  |
|                                              | 502300811         | ,000             | ,000  | ,000  |
|                                              | 502300913         | ,000             | ,000  | ,000  |
| bv3 belasnting vs paoncil dubbla intervallet | 1 medelbelastning |                  |       |       |
|                                              | 2 underbelastning |                  |       |       |
|                                              | 3 överbelastning  |                  |       |       |

## Categorical Variables Codings

|                                              |                   | Parameter coding |       |       |
|----------------------------------------------|-------------------|------------------|-------|-------|
|                                              |                   | (21)             | (22)  | (23)  |
| VASTY2 (SAIR*10000)+VASTY                    | 403073101         | ,000             | ,000  | ,000  |
|                                              | 403073102         | ,000             | ,000  | ,000  |
|                                              | 403073103         | ,000             | ,000  | ,000  |
|                                              | 403073202         | ,000             | ,000  | ,000  |
|                                              | 403073203         | ,000             | ,000  | ,000  |
|                                              | 403073204         | ,000             | ,000  | ,000  |
|                                              | 403073303         | ,000             | ,000  | ,000  |
|                                              | 403073651         | ,000             | ,000  | ,000  |
|                                              | 403073771         | ,000             | ,000  | ,000  |
|                                              | 403133102         | ,000             | ,000  | ,000  |
|                                              | 403133106         | ,000             | ,000  | ,000  |
|                                              | 403133107         | ,000             | ,000  | ,000  |
|                                              | 403133109         | ,000             | ,000  | ,000  |
|                                              | 403133202         | ,000             | ,000  | ,000  |
|                                              | 403133203         | ,000             | ,000  | ,000  |
|                                              | 403133204         | ,000             | ,000  | ,000  |
|                                              | 403133315         | ,000             | ,000  | ,000  |
|                                              | 403133322         | ,000             | ,000  | ,000  |
|                                              | 403133401         | ,000             | ,000  | ,000  |
|                                              | 403133402         | ,000             | ,000  | ,000  |
|                                              | 403133550         | ,000             | ,000  | ,000  |
|                                              | 403133772         | 1,000            | ,000  | ,000  |
|                                              | 403135803         | ,000             | 1,000 | ,000  |
|                                              | 404060001         | ,000             | ,000  | 1,000 |
|                                              | 404060002         | ,000             | ,000  | ,000  |
|                                              | 404310003         | ,000             | ,000  | ,000  |
|                                              | 404310004         | ,000             | ,000  | ,000  |
|                                              | 502300005         | ,000             | ,000  | ,000  |
|                                              | 502300006         | ,000             | ,000  | ,000  |
|                                              | 502300007         | ,000             | ,000  | ,000  |
|                                              | 502300214         | ,000             | ,000  | ,000  |
|                                              | 502300411         | ,000             | ,000  | ,000  |
|                                              | 502300415         | ,000             | ,000  | ,000  |
|                                              | 502300416         | ,000             | ,000  | ,000  |
|                                              | 502300811         | ,000             | ,000  | ,000  |
|                                              | 502300913         | ,000             | ,000  | ,000  |
| bv3 belasnting vs paoncil dubbla intervallet | 1 medelbelastning |                  |       |       |
|                                              | 2 underbelastning |                  |       |       |
|                                              | 3 överbelastning  |                  |       |       |

## Categorical Variables Codings

|                                              |                   | Parameter coding |       |       |
|----------------------------------------------|-------------------|------------------|-------|-------|
|                                              |                   | (24)             | (25)  | (26)  |
| VASTY2 (SAIR*10000)+VASTY                    | 403073101         | ,000             | ,000  | ,000  |
|                                              | 403073102         | ,000             | ,000  | ,000  |
|                                              | 403073103         | ,000             | ,000  | ,000  |
|                                              | 403073202         | ,000             | ,000  | ,000  |
|                                              | 403073203         | ,000             | ,000  | ,000  |
|                                              | 403073204         | ,000             | ,000  | ,000  |
|                                              | 403073303         | ,000             | ,000  | ,000  |
|                                              | 403073651         | ,000             | ,000  | ,000  |
|                                              | 403073771         | ,000             | ,000  | ,000  |
|                                              | 403133102         | ,000             | ,000  | ,000  |
|                                              | 403133106         | ,000             | ,000  | ,000  |
|                                              | 403133107         | ,000             | ,000  | ,000  |
|                                              | 403133109         | ,000             | ,000  | ,000  |
|                                              | 403133202         | ,000             | ,000  | ,000  |
|                                              | 403133203         | ,000             | ,000  | ,000  |
|                                              | 403133204         | ,000             | ,000  | ,000  |
|                                              | 403133315         | ,000             | ,000  | ,000  |
|                                              | 403133322         | ,000             | ,000  | ,000  |
|                                              | 403133401         | ,000             | ,000  | ,000  |
|                                              | 403133402         | ,000             | ,000  | ,000  |
|                                              | 403133550         | ,000             | ,000  | ,000  |
|                                              | 403133772         | ,000             | ,000  | ,000  |
|                                              | 403135803         | ,000             | ,000  | ,000  |
|                                              | 404060001         | ,000             | ,000  | ,000  |
|                                              | 404060002         | 1,000            | ,000  | ,000  |
|                                              | 404310003         | ,000             | 1,000 | ,000  |
|                                              | 404310004         | ,000             | ,000  | 1,000 |
|                                              | 502300005         | ,000             | ,000  | ,000  |
|                                              | 502300006         | ,000             | ,000  | ,000  |
|                                              | 502300007         | ,000             | ,000  | ,000  |
|                                              | 502300214         | ,000             | ,000  | ,000  |
|                                              | 502300411         | ,000             | ,000  | ,000  |
|                                              | 502300415         | ,000             | ,000  | ,000  |
|                                              | 502300416         | ,000             | ,000  | ,000  |
|                                              | 502300811         | ,000             | ,000  | ,000  |
|                                              | 502300913         | ,000             | ,000  | ,000  |
| bv3 belasnting vs paoncil dubbla intervallet | 1 medelbelastning |                  |       |       |
|                                              | 2 underbelastning |                  |       |       |
|                                              | 3 överbelastning  |                  |       |       |

## Categorical Variables Codings

|                                              |                   | Parameter coding |       |       |
|----------------------------------------------|-------------------|------------------|-------|-------|
|                                              |                   | (27)             | (28)  | (29)  |
| VASTY2 (SAIR*10000)+VASTY                    | 403073101         | ,000             | ,000  | ,000  |
|                                              | 403073102         | ,000             | ,000  | ,000  |
|                                              | 403073103         | ,000             | ,000  | ,000  |
|                                              | 403073202         | ,000             | ,000  | ,000  |
|                                              | 403073203         | ,000             | ,000  | ,000  |
|                                              | 403073204         | ,000             | ,000  | ,000  |
|                                              | 403073303         | ,000             | ,000  | ,000  |
|                                              | 403073651         | ,000             | ,000  | ,000  |
|                                              | 403073771         | ,000             | ,000  | ,000  |
|                                              | 403133102         | ,000             | ,000  | ,000  |
|                                              | 403133106         | ,000             | ,000  | ,000  |
|                                              | 403133107         | ,000             | ,000  | ,000  |
|                                              | 403133109         | ,000             | ,000  | ,000  |
|                                              | 403133202         | ,000             | ,000  | ,000  |
|                                              | 403133203         | ,000             | ,000  | ,000  |
|                                              | 403133204         | ,000             | ,000  | ,000  |
|                                              | 403133315         | ,000             | ,000  | ,000  |
|                                              | 403133322         | ,000             | ,000  | ,000  |
|                                              | 403133401         | ,000             | ,000  | ,000  |
|                                              | 403133402         | ,000             | ,000  | ,000  |
|                                              | 403133550         | ,000             | ,000  | ,000  |
|                                              | 403133772         | ,000             | ,000  | ,000  |
|                                              | 403135803         | ,000             | ,000  | ,000  |
|                                              | 404060001         | ,000             | ,000  | ,000  |
|                                              | 404060002         | ,000             | ,000  | ,000  |
|                                              | 404310003         | ,000             | ,000  | ,000  |
|                                              | 404310004         | ,000             | ,000  | ,000  |
|                                              | 502300005         | 1,000            | ,000  | ,000  |
|                                              | 502300006         | ,000             | 1,000 | ,000  |
|                                              | 502300007         | ,000             | ,000  | 1,000 |
|                                              | 502300214         | ,000             | ,000  | ,000  |
|                                              | 502300411         | ,000             | ,000  | ,000  |
|                                              | 502300415         | ,000             | ,000  | ,000  |
|                                              | 502300416         | ,000             | ,000  | ,000  |
|                                              | 502300811         | ,000             | ,000  | ,000  |
|                                              | 502300913         | ,000             | ,000  | ,000  |
| bv3 belasnting vs paoncil dubbla intervallet | 1 medelbelastning |                  |       |       |
|                                              | 2 underbelastning |                  |       |       |
|                                              | 3 överbelastning  |                  |       |       |

## Categorical Variables Codings

|                                              |                   | Parameter coding |       |       |
|----------------------------------------------|-------------------|------------------|-------|-------|
|                                              |                   | (30)             | (31)  | (32)  |
| VASTY2 (SAIR*10000)+VASTY                    | 403073101         | ,000             | ,000  | ,000  |
|                                              | 403073102         | ,000             | ,000  | ,000  |
|                                              | 403073103         | ,000             | ,000  | ,000  |
|                                              | 403073202         | ,000             | ,000  | ,000  |
|                                              | 403073203         | ,000             | ,000  | ,000  |
|                                              | 403073204         | ,000             | ,000  | ,000  |
|                                              | 403073303         | ,000             | ,000  | ,000  |
|                                              | 403073651         | ,000             | ,000  | ,000  |
|                                              | 403073771         | ,000             | ,000  | ,000  |
|                                              | 403133102         | ,000             | ,000  | ,000  |
|                                              | 403133106         | ,000             | ,000  | ,000  |
|                                              | 403133107         | ,000             | ,000  | ,000  |
|                                              | 403133109         | ,000             | ,000  | ,000  |
|                                              | 403133202         | ,000             | ,000  | ,000  |
|                                              | 403133203         | ,000             | ,000  | ,000  |
|                                              | 403133204         | ,000             | ,000  | ,000  |
|                                              | 403133315         | ,000             | ,000  | ,000  |
|                                              | 403133322         | ,000             | ,000  | ,000  |
|                                              | 403133401         | ,000             | ,000  | ,000  |
|                                              | 403133402         | ,000             | ,000  | ,000  |
|                                              | 403133550         | ,000             | ,000  | ,000  |
|                                              | 403133772         | ,000             | ,000  | ,000  |
|                                              | 403135803         | ,000             | ,000  | ,000  |
|                                              | 404060001         | ,000             | ,000  | ,000  |
|                                              | 404060002         | ,000             | ,000  | ,000  |
|                                              | 404310003         | ,000             | ,000  | ,000  |
|                                              | 404310004         | ,000             | ,000  | ,000  |
|                                              | 502300005         | ,000             | ,000  | ,000  |
|                                              | 502300006         | ,000             | ,000  | ,000  |
|                                              | 502300007         | ,000             | ,000  | ,000  |
|                                              | 502300214         | 1,000            | ,000  | ,000  |
|                                              | 502300411         | ,000             | 1,000 | ,000  |
|                                              | 502300415         | ,000             | ,000  | 1,000 |
|                                              | 502300416         | ,000             | ,000  | ,000  |
|                                              | 502300811         | ,000             | ,000  | ,000  |
|                                              | 502300913         | ,000             | ,000  | ,000  |
| bv3 belasnting vs paoncil dubbla intervallet | 1 medelbelastning |                  |       |       |
|                                              | 2 underbelastning |                  |       |       |
|                                              | 3 överbelastning  |                  |       |       |

## Categorical Variables Codings

|                                              |                   | Parameter coding |       |       |
|----------------------------------------------|-------------------|------------------|-------|-------|
|                                              |                   | (33)             | (34)  | (35)  |
| VASTY2 (SAIR*10000)+VASTY                    | 403073101         | ,000             | ,000  | ,000  |
|                                              | 403073102         | ,000             | ,000  | ,000  |
|                                              | 403073103         | ,000             | ,000  | ,000  |
|                                              | 403073202         | ,000             | ,000  | ,000  |
|                                              | 403073203         | ,000             | ,000  | ,000  |
|                                              | 403073204         | ,000             | ,000  | ,000  |
|                                              | 403073303         | ,000             | ,000  | ,000  |
|                                              | 403073651         | ,000             | ,000  | ,000  |
|                                              | 403073771         | ,000             | ,000  | ,000  |
|                                              | 403133102         | ,000             | ,000  | ,000  |
|                                              | 403133106         | ,000             | ,000  | ,000  |
|                                              | 403133107         | ,000             | ,000  | ,000  |
|                                              | 403133109         | ,000             | ,000  | ,000  |
|                                              | 403133202         | ,000             | ,000  | ,000  |
|                                              | 403133203         | ,000             | ,000  | ,000  |
|                                              | 403133204         | ,000             | ,000  | ,000  |
|                                              | 403133315         | ,000             | ,000  | ,000  |
|                                              | 403133322         | ,000             | ,000  | ,000  |
|                                              | 403133401         | ,000             | ,000  | ,000  |
|                                              | 403133402         | ,000             | ,000  | ,000  |
|                                              | 403133550         | ,000             | ,000  | ,000  |
|                                              | 403133772         | ,000             | ,000  | ,000  |
|                                              | 403135803         | ,000             | ,000  | ,000  |
|                                              | 404060001         | ,000             | ,000  | ,000  |
|                                              | 404060002         | ,000             | ,000  | ,000  |
|                                              | 404310003         | ,000             | ,000  | ,000  |
|                                              | 404310004         | ,000             | ,000  | ,000  |
|                                              | 502300005         | ,000             | ,000  | ,000  |
|                                              | 502300006         | ,000             | ,000  | ,000  |
|                                              | 502300007         | ,000             | ,000  | ,000  |
|                                              | 502300214         | ,000             | ,000  | ,000  |
|                                              | 502300411         | ,000             | ,000  | ,000  |
|                                              | 502300415         | ,000             | ,000  | ,000  |
|                                              | 502300416         | 1,000            | ,000  | ,000  |
|                                              | 502300811         | ,000             | 1,000 | ,000  |
|                                              | 502300913         | ,000             | ,000  | 1,000 |
| bv3 belasnting vs paoncil dubbla intervallet | 1 medelbelastning |                  |       |       |
|                                              | 2 underbelastning |                  |       |       |
|                                              | 3 överbelastning  |                  |       |       |

**Block 0: Beginning Block**

Classification Table<sup>a,b</sup>

| Observed           |                                |                           | Predicted                 |                      |
|--------------------|--------------------------------|---------------------------|---------------------------|----------------------|
|                    |                                |                           | 0 ingen eller en händelse | 1 mer än en händelse |
| Step 0             | handlt1 händelse larger than 1 | 0 ingen eller en händelse | 12229                     | 0                    |
|                    |                                | 1 mer än en händelse      | 246                       | 0                    |
| Overall Percentage |                                |                           |                           |                      |

Classification Table<sup>a,b</sup>

| Observed           |                                |                           | Predicted          |
|--------------------|--------------------------------|---------------------------|--------------------|
|                    |                                |                           | Percentage Correct |
| Step 0             | handlt1 händelse larger than 1 | 0 ingen eller en händelse | 100,0              |
|                    |                                | 1 mer än en händelse      | ,0                 |
| Overall Percentage |                                |                           | 98,0               |

a. Constant is included in the model.

b. The cut value is ,500

Variables in the Equation

|                 | B      | S.E. | Wald     | df | Sig. | Exp(B) |
|-----------------|--------|------|----------|----|------|--------|
| Step 0 Constant | -3,906 | ,064 | 3679,612 | 1  | ,000 | ,020   |



## Variables not in the Equation

|        |                    | Score   | df | Sig. |
|--------|--------------------|---------|----|------|
| Step 0 | Variables          |         |    |      |
|        | bv3                | 5,341   | 2  | ,069 |
|        | bv3(1)             | 5,331   | 1  | ,021 |
|        | bv3(2)             | ,212    | 1  | ,645 |
|        | VASTY2             | 211,294 | 35 | ,000 |
|        | VASTY2(1)          | ,109    | 1  | ,741 |
|        | VASTY2(2)          | 2,111   | 1  | ,146 |
|        | VASTY2(3)          | 5,608   | 1  | ,018 |
|        | VASTY2(4)          | ,094    | 1  | ,759 |
|        | VASTY2(5)          | 1,981   | 1  | ,159 |
|        | VASTY2(6)          | 7,542   | 1  | ,006 |
|        | VASTY2(7)          | 3,478   | 1  | ,062 |
|        | VASTY2(8)          | ,006    | 1  | ,940 |
|        | VASTY2(9)          | ,082    | 1  | ,775 |
|        | VASTY2(10)         | 36,459  | 1  | ,000 |
|        | VASTY2(11)         | 27,814  | 1  | ,000 |
|        | VASTY2(12)         | 2,573   | 1  | ,109 |
|        | VASTY2(13)         | ,705    | 1  | ,401 |
|        | VASTY2(14)         | ,209    | 1  | ,647 |
|        | VASTY2(15)         | ,209    | 1  | ,647 |
|        | VASTY2(16)         | ,071    | 1  | ,789 |
|        | VASTY2(17)         | 7,564   | 1  | ,006 |
|        | VASTY2(18)         | 7,500   | 1  | ,006 |
|        | VASTY2(19)         | 5,608   | 1  | ,018 |
|        | VASTY2(20)         | 1,471   | 1  | ,225 |
|        | VASTY2(21)         | 2,573   | 1  | ,109 |
|        | VASTY2(22)         | ,474    | 1  | ,491 |
|        | VASTY2(23)         | 41,219  | 1  | ,000 |
|        | VASTY2(24)         | 20,216  | 1  | ,000 |
|        | VASTY2(25)         | ,290    | 1  | ,590 |
|        | VASTY2(26)         | ,550    | 1  | ,458 |
|        | VASTY2(27)         | 5,629   | 1  | ,018 |
|        | VASTY2(28)         | 2,766   | 1  | ,096 |
|        | VASTY2(29)         | 7,585   | 1  | ,006 |
|        | VASTY2(30)         | ,089    | 1  | ,765 |
|        | VASTY2(31)         | 8,820   | 1  | ,003 |
|        | VASTY2(32)         | ,652    | 1  | ,419 |
|        | VASTY2(33)         | 1,464   | 1  | ,226 |
|        | VASTY2(34)         | 5,587   | 1  | ,018 |
|        | VASTY2(35)         | 7,764   | 1  | ,005 |
|        | Overall Statistics | 214,747 | 37 | ,000 |

**Block 1: Method = Enter**

## Omnibus Tests of Model Coefficients

|        |       | Chi-square | df | Sig. |
|--------|-------|------------|----|------|
| Step 1 | Step  | 212,717    | 37 | ,000 |
|        | Block | 212,717    | 37 | ,000 |
|        | Model | 212,717    | 37 | ,000 |

## Model Summary

| Step | -2 Log likelihood     | Cox & Snell R Square | Nagelkerke R Square |
|------|-----------------------|----------------------|---------------------|
| 1    | 2206,066 <sup>a</sup> | ,017                 | ,096                |

a. Estimation terminated at iteration number 20 because maximum iterations has been reached. Final solution cannot be found.

Classification Table<sup>a</sup>

|                    |                                |                           | Predicted                 |                      |
|--------------------|--------------------------------|---------------------------|---------------------------|----------------------|
|                    |                                |                           | 0 ingen eller en händelse | 1 mer än en händelse |
|                    | Observed                       |                           |                           |                      |
| Step 1             | handlt1 händelse larger than 1 | 0 ingen eller en händelse | 12229                     | 0                    |
|                    |                                | 1 mer än en händelse      | 246                       | 0                    |
| Overall Percentage |                                |                           |                           |                      |

Classification Table<sup>a</sup>

|                    |                                |                           | Predicted          |
|--------------------|--------------------------------|---------------------------|--------------------|
|                    |                                |                           | Percentage Correct |
|                    | Observed                       |                           |                    |
| Step 1             | handlt1 händelse larger than 1 | 0 ingen eller en händelse | 100,0              |
|                    |                                | 1 mer än en händelse      | ,0                 |
| Overall Percentage |                                |                           | 98,0               |

a. The cut value is ,500

## Variables in the Equation

|                         | B       | S.E.     | Wald    | df | Sig. | Exp(B) |
|-------------------------|---------|----------|---------|----|------|--------|
| Step 1 <sup>a</sup> bv3 |         |          | 3,508   | 2  | ,173 |        |
| bv3(1)                  | -,484   | ,259     | 3,492   | 1  | ,062 | ,616   |
| bv3(2)                  | -,018   | ,194     | ,009    | 1  | ,926 | ,982   |
| VASTY2                  |         |          | 118,219 | 35 | ,000 |        |
| VASTY2(1)               | ,522    | ,575     | ,825    | 1  | ,364 | 1,686  |
| VASTY2(2)               | ,795    | ,545     | 2,131   | 1  | ,144 | 2,214  |
| VASTY2(3)               | -1,646  | 1,100    | 2,238   | 1  | ,135 | ,193   |
| VASTY2(4)               | ,461    | ,578     | ,637    | 1  | ,425 | 1,585  |
| VASTY2(5)               | -,412   | ,735     | ,314    | 1  | ,575 | ,663   |
| VASTY2(6)               | -16,921 | 2104,931 | ,000    | 1  | ,994 | ,000   |
| VASTY2(7)               | ,894    | ,548     | 2,666   | 1  | ,103 | 2,445  |
| VASTY2(8)               | ,329    | ,591     | ,310    | 1  | ,578 | 1,389  |
| VASTY2(9)               | ,249    | ,611     | ,166    | 1  | ,684 | 1,283  |
| VASTY2(10)              | 1,554   | ,499     | 9,677   | 1  | ,002 | 4,728  |
| VASTY2(11)              | 1,499   | ,504     | 8,860   | 1  | ,003 | 4,479  |
| VASTY2(12)              | -,535   | ,734     | ,531    | 1  | ,466 | ,586   |
| VASTY2(13)              | -,027   | ,638     | ,002    | 1  | ,966 | ,973   |
| VASTY2(14)              | ,182    | ,611     | ,089    | 1  | ,766 | 1,200  |
| VASTY2(15)              | ,179    | ,610     | ,086    | 1  | ,770 | 1,196  |
| VASTY2(16)              | ,265    | ,738     | ,129    | 1  | ,720 | 1,303  |
| VASTY2(17)              | -16,892 | 2100,571 | ,000    | 1  | ,994 | ,000   |
| VASTY2(18)              | -16,886 | 2109,059 | ,000    | 1  | ,994 | ,000   |
| VASTY2(19)              | -1,345  | 1,107    | 1,477   | 1  | ,224 | ,261   |
| VASTY2(20)              | -,297   | ,736     | ,162    | 1  | ,687 | ,743   |
| VASTY2(21)              | -,520   | ,734     | ,501    | 1  | ,479 | ,595   |
| VASTY2(22)              | ,645    | ,563     | 1,311   | 1  | ,252 | 1,906  |
| VASTY2(23)              | 1,655   | ,498     | 11,062  | 1  | ,001 | 5,235  |
| VASTY2(24)              | 1,350   | ,511     | 6,982   | 1  | ,008 | 3,856  |
| VASTY2(25)              | ,615    | ,591     | 1,083   | 1  | ,298 | 1,850  |
| VASTY2(26)              | ,016    | ,676     | ,001    | 1  | ,981 | 1,016  |
| VASTY2(27)              | -1,612  | 1,099    | 2,154   | 1  | ,142 | ,199   |
| VASTY2(28)              | -1,165  | 1,099    | 1,124   | 1  | ,289 | ,312   |
| VASTY2(29)              | -16,951 | 2100,489 | ,000    | 1  | ,994 | ,000   |
| VASTY2(30)              | ,453    | ,575     | ,621    | 1  | ,431 | 1,574  |
| VASTY2(31)              | 1,211   | ,526     | 5,307   | 1  | ,021 | 3,356  |
| VASTY2(32)              | ,137    | ,640     | ,046    | 1  | ,831 | 1,147  |
| VASTY2(33)              | -,125   | ,677     | ,034    | 1  | ,853 | ,882   |
| VASTY2(34)              | -1,622  | 1,098    | 2,183   | 1  | ,140 | ,197   |
| VASTY2(35)              | 1,141   | ,537     | 4,512   | 1  | ,034 | 3,131  |
| Constant                | -4,243  | ,451     | 88,672  | 1  | ,000 | ,014   |

## Variables in the Equation

|                     |            | 95% C.I. for EXP(B) |        |
|---------------------|------------|---------------------|--------|
|                     |            | Lower               | Upper  |
| Step 1 <sup>a</sup> | bv3        |                     |        |
|                     | bv3(1)     | ,371                | 1,024  |
|                     | bv3(2)     | ,672                | 1,436  |
|                     | VASTY2     |                     |        |
|                     | VASTY2(1)  | ,546                | 5,207  |
|                     | VASTY2(2)  | ,762                | 6,439  |
|                     | VASTY2(3)  | ,022                | 1,666  |
|                     | VASTY2(4)  | ,511                | 4,918  |
|                     | VASTY2(5)  | ,157                | 2,797  |
|                     | VASTY2(6)  | ,000                | .      |
|                     | VASTY2(7)  | ,836                | 7,153  |
|                     | VASTY2(8)  | ,437                | 4,421  |
|                     | VASTY2(9)  | ,387                | 4,248  |
|                     | VASTY2(10) | 1,777               | 12,583 |
|                     | VASTY2(11) | 1,669               | 12,023 |
|                     | VASTY2(12) | ,139                | 2,469  |
|                     | VASTY2(13) | ,279                | 3,398  |
|                     | VASTY2(14) | ,362                | 3,971  |
|                     | VASTY2(15) | ,362                | 3,955  |
|                     | VASTY2(16) | ,306                | 5,541  |
|                     | VASTY2(17) | ,000                | .      |
|                     | VASTY2(18) | ,000                | .      |
|                     | VASTY2(19) | ,030                | 2,280  |
|                     | VASTY2(20) | ,176                | 3,148  |
|                     | VASTY2(21) | ,141                | 2,508  |
|                     | VASTY2(22) | ,632                | 5,747  |
|                     | VASTY2(23) | 1,974               | 13,886 |
|                     | VASTY2(24) | 1,417               | 10,493 |
|                     | VASTY2(25) | ,581                | 5,896  |
|                     | VASTY2(26) | ,270                | 3,824  |
|                     | VASTY2(27) | ,023                | 1,717  |
|                     | VASTY2(28) | ,036                | 2,688  |
|                     | VASTY2(29) | ,000                | .      |
|                     | VASTY2(30) | ,510                | 4,860  |
|                     | VASTY2(31) | 1,198               | 9,399  |
|                     | VASTY2(32) | ,327                | 4,022  |
|                     | VASTY2(33) | ,234                | 3,323  |
|                     | VASTY2(34) | ,023                | 1,698  |
|                     | VASTY2(35) | 1,092               | 8,976  |
|                     | Constant   |                     |        |

a. Variable(s) entered on step 1: bv3, VASTY2.

```

1
2
3 LOGISTIC REGRESSION VARIABLES handlt1
4   /METHOD=ENTER sv3 VASTY2
5   /CONTRAST (sv3)=Indicator(1)
6   /CONTRAST (VASTY2)=Indicator(1)
7   /PRINT=CI(95)
8   /CRITERIA=PIN(0.05) POUT(0.10) ITERATE(20) CUT(0.5).
9
10
11

```

## Logistic Regression

[DataSet6] C:\cWordjan\Rafaela\_VCS\alla\_tillsammans\abo\_bjo\_vasa\_v1.sav

### Case Processing Summary

| Unweighted Cases <sup>a</sup> |                      | N     | Percent |
|-------------------------------|----------------------|-------|---------|
| Selected Cases                | Included in Analysis | 12475 | 100,0   |
|                               | Missing Cases        | 0     | ,0      |
|                               | Total                | 12475 | 100,0   |
| Unselected Cases              |                      | 0     | ,0      |
| Total                         |                      | 12475 | 100,0   |

a. If weight is in effect, see classification table for the total number of cases.

### Dependent Variable Encoding

| Original Value            | Internal Value |
|---------------------------|----------------|
| 0 ingen eller en händelse | 0              |
| 1 mer än en händelse      | 1              |

## Categorical Variables Codings

|                                                  | Frequency | Parameter coding |       |       |
|--------------------------------------------------|-----------|------------------|-------|-------|
|                                                  |           | (1)              | (2)   | (3)   |
| VASTY2 (SAIR*10000)+VASTY 403073101              | 365       | ,000             | ,000  | ,000  |
| 403073102                                        | 362       | 1,000            | ,000  | ,000  |
| 403073103                                        | 365       | ,000             | 1,000 | ,000  |
| 403073202                                        | 365       | ,000             | ,000  | 1,000 |
| 403073203                                        | 365       | ,000             | ,000  | ,000  |
| 403073204                                        | 330       | ,000             | ,000  | ,000  |
| 403073303                                        | 364       | ,000             | ,000  | ,000  |
| 403073651                                        | 362       | ,000             | ,000  | ,000  |
| 403073771                                        | 365       | ,000             | ,000  | ,000  |
| 403133102                                        | 341       | ,000             | ,000  | ,000  |
| 403133106                                        | 365       | ,000             | ,000  | ,000  |
| 403133107                                        | 365       | ,000             | ,000  | ,000  |
| 403133109                                        | 365       | ,000             | ,000  | ,000  |
| 403133202                                        | 365       | ,000             | ,000  | ,000  |
| 403133203                                        | 365       | ,000             | ,000  | ,000  |
| 403133204                                        | 365       | ,000             | ,000  | ,000  |
| 403133315                                        | 177       | ,000             | ,000  | ,000  |
| 403133322                                        | 365       | ,000             | ,000  | ,000  |
| 403133401                                        | 362       | ,000             | ,000  | ,000  |
| 403133402                                        | 365       | ,000             | ,000  | ,000  |
| 403133550                                        | 298       | ,000             | ,000  | ,000  |
| 403133772                                        | 365       | ,000             | ,000  | ,000  |
| 403135803                                        | 365       | ,000             | ,000  | ,000  |
| 404060001                                        | 365       | ,000             | ,000  | ,000  |
| 404060002                                        | 366       | ,000             | ,000  | ,000  |
| 404310003                                        | 291       | ,000             | ,000  | ,000  |
| 404310004                                        | 291       | ,000             | ,000  | ,000  |
| 502300005                                        | 366       | ,000             | ,000  | ,000  |
| 502300006                                        | 225       | ,000             | ,000  | ,000  |
| 502300007                                        | 366       | ,000             | ,000  | ,000  |
| 502300214                                        | 366       | ,000             | ,000  | ,000  |
| 502300411                                        | 366       | ,000             | ,000  | ,000  |
| 502300415                                        | 360       | ,000             | ,000  | ,000  |
| 502300416                                        | 363       | ,000             | ,000  | ,000  |
| 502300811                                        | 364       | ,000             | ,000  | ,000  |
| 502300913                                        | 315       | ,000             | ,000  | ,000  |
| sv3 tredjedelar för standard 1 andra tredjedelen | 3172      | ,000             | ,000  |       |
| 2 första tredjedelen                             | 4718      | 1,000            | ,000  |       |
| 3 tredje tredjedelen                             | 4585      | ,000             | 1,000 |       |

## Categorical Variables Codings

|                              |                      | Parameter coding |       |       |       |
|------------------------------|----------------------|------------------|-------|-------|-------|
|                              |                      | (4)              | (5)   | (6)   | (7)   |
| VASTY2 (SAIR*10000)+VASTY    | 403073101            | ,000             | ,000  | ,000  | ,000  |
|                              | 403073102            | ,000             | ,000  | ,000  | ,000  |
|                              | 403073103            | ,000             | ,000  | ,000  | ,000  |
|                              | 403073202            | ,000             | ,000  | ,000  | ,000  |
|                              | 403073203            | 1,000            | ,000  | ,000  | ,000  |
|                              | 403073204            | ,000             | 1,000 | ,000  | ,000  |
|                              | 403073303            | ,000             | ,000  | 1,000 | ,000  |
|                              | 403073651            | ,000             | ,000  | ,000  | 1,000 |
|                              | 403073771            | ,000             | ,000  | ,000  | ,000  |
|                              | 403133102            | ,000             | ,000  | ,000  | ,000  |
|                              | 403133106            | ,000             | ,000  | ,000  | ,000  |
|                              | 403133107            | ,000             | ,000  | ,000  | ,000  |
|                              | 403133109            | ,000             | ,000  | ,000  | ,000  |
|                              | 403133202            | ,000             | ,000  | ,000  | ,000  |
|                              | 403133203            | ,000             | ,000  | ,000  | ,000  |
|                              | 403133204            | ,000             | ,000  | ,000  | ,000  |
|                              | 403133315            | ,000             | ,000  | ,000  | ,000  |
|                              | 403133322            | ,000             | ,000  | ,000  | ,000  |
|                              | 403133401            | ,000             | ,000  | ,000  | ,000  |
|                              | 403133402            | ,000             | ,000  | ,000  | ,000  |
|                              | 403133550            | ,000             | ,000  | ,000  | ,000  |
|                              | 403133772            | ,000             | ,000  | ,000  | ,000  |
|                              | 403135803            | ,000             | ,000  | ,000  | ,000  |
|                              | 404060001            | ,000             | ,000  | ,000  | ,000  |
|                              | 404060002            | ,000             | ,000  | ,000  | ,000  |
|                              | 404310003            | ,000             | ,000  | ,000  | ,000  |
|                              | 404310004            | ,000             | ,000  | ,000  | ,000  |
|                              | 502300005            | ,000             | ,000  | ,000  | ,000  |
|                              | 502300006            | ,000             | ,000  | ,000  | ,000  |
|                              | 502300007            | ,000             | ,000  | ,000  | ,000  |
|                              | 502300214            | ,000             | ,000  | ,000  | ,000  |
|                              | 502300411            | ,000             | ,000  | ,000  | ,000  |
|                              | 502300415            | ,000             | ,000  | ,000  | ,000  |
|                              | 502300416            | ,000             | ,000  | ,000  | ,000  |
|                              | 502300811            | ,000             | ,000  | ,000  | ,000  |
|                              | 502300913            | ,000             | ,000  | ,000  | ,000  |
| sv3 tredjedelar för standard | 1 andra tredjedelen  |                  |       |       |       |
|                              | 2 första tredjedelen |                  |       |       |       |
|                              | 3 tredje tredjedelen |                  |       |       |       |

## Categorical Variables Codings

|                              |                      | Parameter coding |       |       |       |
|------------------------------|----------------------|------------------|-------|-------|-------|
|                              |                      | (8)              | (9)   | (10)  | (11)  |
| VASTY2 (SAIR*10000)+VASTY    | 403073101            | ,000             | ,000  | ,000  | ,000  |
|                              | 403073102            | ,000             | ,000  | ,000  | ,000  |
|                              | 403073103            | ,000             | ,000  | ,000  | ,000  |
|                              | 403073202            | ,000             | ,000  | ,000  | ,000  |
|                              | 403073203            | ,000             | ,000  | ,000  | ,000  |
|                              | 403073204            | ,000             | ,000  | ,000  | ,000  |
|                              | 403073303            | ,000             | ,000  | ,000  | ,000  |
|                              | 403073651            | ,000             | ,000  | ,000  | ,000  |
|                              | 403073771            | 1,000            | ,000  | ,000  | ,000  |
|                              | 403133102            | ,000             | 1,000 | ,000  | ,000  |
|                              | 403133106            | ,000             | ,000  | 1,000 | ,000  |
|                              | 403133107            | ,000             | ,000  | ,000  | 1,000 |
|                              | 403133109            | ,000             | ,000  | ,000  | ,000  |
|                              | 403133202            | ,000             | ,000  | ,000  | ,000  |
|                              | 403133203            | ,000             | ,000  | ,000  | ,000  |
|                              | 403133204            | ,000             | ,000  | ,000  | ,000  |
|                              | 403133315            | ,000             | ,000  | ,000  | ,000  |
|                              | 403133322            | ,000             | ,000  | ,000  | ,000  |
|                              | 403133401            | ,000             | ,000  | ,000  | ,000  |
|                              | 403133402            | ,000             | ,000  | ,000  | ,000  |
|                              | 403133550            | ,000             | ,000  | ,000  | ,000  |
|                              | 403133772            | ,000             | ,000  | ,000  | ,000  |
|                              | 403135803            | ,000             | ,000  | ,000  | ,000  |
|                              | 404060001            | ,000             | ,000  | ,000  | ,000  |
|                              | 404060002            | ,000             | ,000  | ,000  | ,000  |
|                              | 404310003            | ,000             | ,000  | ,000  | ,000  |
|                              | 404310004            | ,000             | ,000  | ,000  | ,000  |
|                              | 502300005            | ,000             | ,000  | ,000  | ,000  |
|                              | 502300006            | ,000             | ,000  | ,000  | ,000  |
|                              | 502300007            | ,000             | ,000  | ,000  | ,000  |
|                              | 502300214            | ,000             | ,000  | ,000  | ,000  |
|                              | 502300411            | ,000             | ,000  | ,000  | ,000  |
|                              | 502300415            | ,000             | ,000  | ,000  | ,000  |
|                              | 502300416            | ,000             | ,000  | ,000  | ,000  |
|                              | 502300811            | ,000             | ,000  | ,000  | ,000  |
|                              | 502300913            | ,000             | ,000  | ,000  | ,000  |
| sv3 tredjedelar för standard | 1 andra tredjedelen  |                  |       |       |       |
|                              | 2 första tredjedelen |                  |       |       |       |
|                              | 3 tredje tredjedelen |                  |       |       |       |



## Categorical Variables Codings

|                              |                      | Parameter coding |       |       |       |
|------------------------------|----------------------|------------------|-------|-------|-------|
|                              |                      | (12)             | (13)  | (14)  | (15)  |
| VASTY2 (SAIR*10000)+VASTY    | 403073101            | ,000             | ,000  | ,000  | ,000  |
|                              | 403073102            | ,000             | ,000  | ,000  | ,000  |
|                              | 403073103            | ,000             | ,000  | ,000  | ,000  |
|                              | 403073202            | ,000             | ,000  | ,000  | ,000  |
|                              | 403073203            | ,000             | ,000  | ,000  | ,000  |
|                              | 403073204            | ,000             | ,000  | ,000  | ,000  |
|                              | 403073303            | ,000             | ,000  | ,000  | ,000  |
|                              | 403073651            | ,000             | ,000  | ,000  | ,000  |
|                              | 403073771            | ,000             | ,000  | ,000  | ,000  |
|                              | 403133102            | ,000             | ,000  | ,000  | ,000  |
|                              | 403133106            | ,000             | ,000  | ,000  | ,000  |
|                              | 403133107            | ,000             | ,000  | ,000  | ,000  |
|                              | 403133109            | 1,000            | ,000  | ,000  | ,000  |
|                              | 403133202            | ,000             | 1,000 | ,000  | ,000  |
|                              | 403133203            | ,000             | ,000  | 1,000 | ,000  |
|                              | 403133204            | ,000             | ,000  | ,000  | 1,000 |
|                              | 403133315            | ,000             | ,000  | ,000  | ,000  |
|                              | 403133322            | ,000             | ,000  | ,000  | ,000  |
|                              | 403133401            | ,000             | ,000  | ,000  | ,000  |
|                              | 403133402            | ,000             | ,000  | ,000  | ,000  |
|                              | 403133550            | ,000             | ,000  | ,000  | ,000  |
|                              | 403133772            | ,000             | ,000  | ,000  | ,000  |
|                              | 403135803            | ,000             | ,000  | ,000  | ,000  |
|                              | 404060001            | ,000             | ,000  | ,000  | ,000  |
|                              | 404060002            | ,000             | ,000  | ,000  | ,000  |
|                              | 404310003            | ,000             | ,000  | ,000  | ,000  |
|                              | 404310004            | ,000             | ,000  | ,000  | ,000  |
|                              | 502300005            | ,000             | ,000  | ,000  | ,000  |
|                              | 502300006            | ,000             | ,000  | ,000  | ,000  |
|                              | 502300007            | ,000             | ,000  | ,000  | ,000  |
|                              | 502300214            | ,000             | ,000  | ,000  | ,000  |
|                              | 502300411            | ,000             | ,000  | ,000  | ,000  |
|                              | 502300415            | ,000             | ,000  | ,000  | ,000  |
|                              | 502300416            | ,000             | ,000  | ,000  | ,000  |
|                              | 502300811            | ,000             | ,000  | ,000  | ,000  |
|                              | 502300913            | ,000             | ,000  | ,000  | ,000  |
| sv3 tredjedelar för standard | 1 andra tredjedelen  |                  |       |       |       |
|                              | 2 första tredjedelen |                  |       |       |       |
|                              | 3 tredje tredjedelen |                  |       |       |       |

## Categorical Variables Codings

|                              |                      | Parameter coding |       |       |       |
|------------------------------|----------------------|------------------|-------|-------|-------|
|                              |                      | (16)             | (17)  | (18)  | (19)  |
| VASTY2 (SAIR*10000)+VASTY    | 403073101            | ,000             | ,000  | ,000  | ,000  |
|                              | 403073102            | ,000             | ,000  | ,000  | ,000  |
|                              | 403073103            | ,000             | ,000  | ,000  | ,000  |
|                              | 403073202            | ,000             | ,000  | ,000  | ,000  |
|                              | 403073203            | ,000             | ,000  | ,000  | ,000  |
|                              | 403073204            | ,000             | ,000  | ,000  | ,000  |
|                              | 403073303            | ,000             | ,000  | ,000  | ,000  |
|                              | 403073651            | ,000             | ,000  | ,000  | ,000  |
|                              | 403073771            | ,000             | ,000  | ,000  | ,000  |
|                              | 403133102            | ,000             | ,000  | ,000  | ,000  |
|                              | 403133106            | ,000             | ,000  | ,000  | ,000  |
|                              | 403133107            | ,000             | ,000  | ,000  | ,000  |
|                              | 403133109            | ,000             | ,000  | ,000  | ,000  |
|                              | 403133202            | ,000             | ,000  | ,000  | ,000  |
|                              | 403133203            | ,000             | ,000  | ,000  | ,000  |
|                              | 403133204            | ,000             | ,000  | ,000  | ,000  |
|                              | 403133315            | 1,000            | ,000  | ,000  | ,000  |
|                              | 403133322            | ,000             | 1,000 | ,000  | ,000  |
|                              | 403133401            | ,000             | ,000  | 1,000 | ,000  |
|                              | 403133402            | ,000             | ,000  | ,000  | 1,000 |
|                              | 403133550            | ,000             | ,000  | ,000  | ,000  |
|                              | 403133772            | ,000             | ,000  | ,000  | ,000  |
|                              | 403135803            | ,000             | ,000  | ,000  | ,000  |
|                              | 404060001            | ,000             | ,000  | ,000  | ,000  |
|                              | 404060002            | ,000             | ,000  | ,000  | ,000  |
|                              | 404310003            | ,000             | ,000  | ,000  | ,000  |
|                              | 404310004            | ,000             | ,000  | ,000  | ,000  |
|                              | 502300005            | ,000             | ,000  | ,000  | ,000  |
|                              | 502300006            | ,000             | ,000  | ,000  | ,000  |
|                              | 502300007            | ,000             | ,000  | ,000  | ,000  |
|                              | 502300214            | ,000             | ,000  | ,000  | ,000  |
|                              | 502300411            | ,000             | ,000  | ,000  | ,000  |
|                              | 502300415            | ,000             | ,000  | ,000  | ,000  |
|                              | 502300416            | ,000             | ,000  | ,000  | ,000  |
|                              | 502300811            | ,000             | ,000  | ,000  | ,000  |
|                              | 502300913            | ,000             | ,000  | ,000  | ,000  |
| sv3 tredjedelar för standard | 1 andra tredjedelen  |                  |       |       |       |
|                              | 2 första tredjedelen |                  |       |       |       |
|                              | 3 tredje tredjedelen |                  |       |       |       |

## Categorical Variables Codings

|                              |                      | Parameter coding |       |       |       |
|------------------------------|----------------------|------------------|-------|-------|-------|
|                              |                      | (20)             | (21)  | (22)  | (23)  |
| VASTY2 (SAIR*10000)+VASTY    | 403073101            | ,000             | ,000  | ,000  | ,000  |
|                              | 403073102            | ,000             | ,000  | ,000  | ,000  |
|                              | 403073103            | ,000             | ,000  | ,000  | ,000  |
|                              | 403073202            | ,000             | ,000  | ,000  | ,000  |
|                              | 403073203            | ,000             | ,000  | ,000  | ,000  |
|                              | 403073204            | ,000             | ,000  | ,000  | ,000  |
|                              | 403073303            | ,000             | ,000  | ,000  | ,000  |
|                              | 403073651            | ,000             | ,000  | ,000  | ,000  |
|                              | 403073771            | ,000             | ,000  | ,000  | ,000  |
|                              | 403133102            | ,000             | ,000  | ,000  | ,000  |
|                              | 403133106            | ,000             | ,000  | ,000  | ,000  |
|                              | 403133107            | ,000             | ,000  | ,000  | ,000  |
|                              | 403133109            | ,000             | ,000  | ,000  | ,000  |
|                              | 403133202            | ,000             | ,000  | ,000  | ,000  |
|                              | 403133203            | ,000             | ,000  | ,000  | ,000  |
|                              | 403133204            | ,000             | ,000  | ,000  | ,000  |
|                              | 403133315            | ,000             | ,000  | ,000  | ,000  |
|                              | 403133322            | ,000             | ,000  | ,000  | ,000  |
|                              | 403133401            | ,000             | ,000  | ,000  | ,000  |
|                              | 403133402            | ,000             | ,000  | ,000  | ,000  |
|                              | 403133550            | 1,000            | ,000  | ,000  | ,000  |
|                              | 403133772            | ,000             | 1,000 | ,000  | ,000  |
|                              | 403135803            | ,000             | ,000  | 1,000 | ,000  |
|                              | 404060001            | ,000             | ,000  | ,000  | 1,000 |
|                              | 404060002            | ,000             | ,000  | ,000  | ,000  |
|                              | 404310003            | ,000             | ,000  | ,000  | ,000  |
|                              | 404310004            | ,000             | ,000  | ,000  | ,000  |
|                              | 502300005            | ,000             | ,000  | ,000  | ,000  |
|                              | 502300006            | ,000             | ,000  | ,000  | ,000  |
|                              | 502300007            | ,000             | ,000  | ,000  | ,000  |
|                              | 502300214            | ,000             | ,000  | ,000  | ,000  |
|                              | 502300411            | ,000             | ,000  | ,000  | ,000  |
|                              | 502300415            | ,000             | ,000  | ,000  | ,000  |
|                              | 502300416            | ,000             | ,000  | ,000  | ,000  |
|                              | 502300811            | ,000             | ,000  | ,000  | ,000  |
|                              | 502300913            | ,000             | ,000  | ,000  | ,000  |
| sv3 tredjedelar för standard | 1 andra tredjedelen  |                  |       |       |       |
|                              | 2 första tredjedelen |                  |       |       |       |
|                              | 3 tredje tredjedelen |                  |       |       |       |

## Categorical Variables Codings

|                              |                      | Parameter coding |       |       |       |
|------------------------------|----------------------|------------------|-------|-------|-------|
|                              |                      | (24)             | (25)  | (26)  | (27)  |
| VASTY2 (SAIR*10000)+VASTY    | 403073101            | ,000             | ,000  | ,000  | ,000  |
|                              | 403073102            | ,000             | ,000  | ,000  | ,000  |
|                              | 403073103            | ,000             | ,000  | ,000  | ,000  |
|                              | 403073202            | ,000             | ,000  | ,000  | ,000  |
|                              | 403073203            | ,000             | ,000  | ,000  | ,000  |
|                              | 403073204            | ,000             | ,000  | ,000  | ,000  |
|                              | 403073303            | ,000             | ,000  | ,000  | ,000  |
|                              | 403073651            | ,000             | ,000  | ,000  | ,000  |
|                              | 403073771            | ,000             | ,000  | ,000  | ,000  |
|                              | 403133102            | ,000             | ,000  | ,000  | ,000  |
|                              | 403133106            | ,000             | ,000  | ,000  | ,000  |
|                              | 403133107            | ,000             | ,000  | ,000  | ,000  |
|                              | 403133109            | ,000             | ,000  | ,000  | ,000  |
|                              | 403133202            | ,000             | ,000  | ,000  | ,000  |
|                              | 403133203            | ,000             | ,000  | ,000  | ,000  |
|                              | 403133204            | ,000             | ,000  | ,000  | ,000  |
|                              | 403133315            | ,000             | ,000  | ,000  | ,000  |
|                              | 403133322            | ,000             | ,000  | ,000  | ,000  |
|                              | 403133401            | ,000             | ,000  | ,000  | ,000  |
|                              | 403133402            | ,000             | ,000  | ,000  | ,000  |
|                              | 403133550            | ,000             | ,000  | ,000  | ,000  |
|                              | 403133772            | ,000             | ,000  | ,000  | ,000  |
|                              | 403135803            | ,000             | ,000  | ,000  | ,000  |
|                              | 404060001            | ,000             | ,000  | ,000  | ,000  |
|                              | 404060002            | 1,000            | ,000  | ,000  | ,000  |
|                              | 404310003            | ,000             | 1,000 | ,000  | ,000  |
|                              | 404310004            | ,000             | ,000  | 1,000 | ,000  |
|                              | 502300005            | ,000             | ,000  | ,000  | 1,000 |
|                              | 502300006            | ,000             | ,000  | ,000  | ,000  |
|                              | 502300007            | ,000             | ,000  | ,000  | ,000  |
|                              | 502300214            | ,000             | ,000  | ,000  | ,000  |
|                              | 502300411            | ,000             | ,000  | ,000  | ,000  |
|                              | 502300415            | ,000             | ,000  | ,000  | ,000  |
|                              | 502300416            | ,000             | ,000  | ,000  | ,000  |
|                              | 502300811            | ,000             | ,000  | ,000  | ,000  |
|                              | 502300913            | ,000             | ,000  | ,000  | ,000  |
| sv3 tredjedelar för standard | 1 andra tredjedelen  |                  |       |       |       |
|                              | 2 första tredjedelen |                  |       |       |       |
|                              | 3 tredje tredjedelen |                  |       |       |       |

## Categorical Variables Codings

|                              |                      | Parameter coding |       |       |       |
|------------------------------|----------------------|------------------|-------|-------|-------|
|                              |                      | (28)             | (29)  | (30)  | (31)  |
| VASTY2 (SAIR*10000)+VASTY    | 403073101            | ,000             | ,000  | ,000  | ,000  |
|                              | 403073102            | ,000             | ,000  | ,000  | ,000  |
|                              | 403073103            | ,000             | ,000  | ,000  | ,000  |
|                              | 403073202            | ,000             | ,000  | ,000  | ,000  |
|                              | 403073203            | ,000             | ,000  | ,000  | ,000  |
|                              | 403073204            | ,000             | ,000  | ,000  | ,000  |
|                              | 403073303            | ,000             | ,000  | ,000  | ,000  |
|                              | 403073651            | ,000             | ,000  | ,000  | ,000  |
|                              | 403073771            | ,000             | ,000  | ,000  | ,000  |
|                              | 403133102            | ,000             | ,000  | ,000  | ,000  |
|                              | 403133106            | ,000             | ,000  | ,000  | ,000  |
|                              | 403133107            | ,000             | ,000  | ,000  | ,000  |
|                              | 403133109            | ,000             | ,000  | ,000  | ,000  |
|                              | 403133202            | ,000             | ,000  | ,000  | ,000  |
|                              | 403133203            | ,000             | ,000  | ,000  | ,000  |
|                              | 403133204            | ,000             | ,000  | ,000  | ,000  |
|                              | 403133315            | ,000             | ,000  | ,000  | ,000  |
|                              | 403133322            | ,000             | ,000  | ,000  | ,000  |
|                              | 403133401            | ,000             | ,000  | ,000  | ,000  |
|                              | 403133402            | ,000             | ,000  | ,000  | ,000  |
|                              | 403133550            | ,000             | ,000  | ,000  | ,000  |
|                              | 403133772            | ,000             | ,000  | ,000  | ,000  |
|                              | 403135803            | ,000             | ,000  | ,000  | ,000  |
|                              | 404060001            | ,000             | ,000  | ,000  | ,000  |
|                              | 404060002            | ,000             | ,000  | ,000  | ,000  |
|                              | 404310003            | ,000             | ,000  | ,000  | ,000  |
|                              | 404310004            | ,000             | ,000  | ,000  | ,000  |
|                              | 502300005            | ,000             | ,000  | ,000  | ,000  |
|                              | 502300006            | 1,000            | ,000  | ,000  | ,000  |
|                              | 502300007            | ,000             | 1,000 | ,000  | ,000  |
|                              | 502300214            | ,000             | ,000  | 1,000 | ,000  |
|                              | 502300411            | ,000             | ,000  | ,000  | 1,000 |
|                              | 502300415            | ,000             | ,000  | ,000  | ,000  |
|                              | 502300416            | ,000             | ,000  | ,000  | ,000  |
|                              | 502300811            | ,000             | ,000  | ,000  | ,000  |
|                              | 502300913            | ,000             | ,000  | ,000  | ,000  |
| sv3 tredjedelar för standard | 1 andra tredjedelen  |                  |       |       |       |
|                              | 2 första tredjedelen |                  |       |       |       |
|                              | 3 tredje tredjedelen |                  |       |       |       |

## Categorical Variables Codings

|                              |                      | Parameter coding |       |       |       |
|------------------------------|----------------------|------------------|-------|-------|-------|
|                              |                      | (32)             | (33)  | (34)  | (35)  |
| VASTY2 (SAIR*10000)+VASTY    | 403073101            | ,000             | ,000  | ,000  | ,000  |
|                              | 403073102            | ,000             | ,000  | ,000  | ,000  |
|                              | 403073103            | ,000             | ,000  | ,000  | ,000  |
|                              | 403073202            | ,000             | ,000  | ,000  | ,000  |
|                              | 403073203            | ,000             | ,000  | ,000  | ,000  |
|                              | 403073204            | ,000             | ,000  | ,000  | ,000  |
|                              | 403073303            | ,000             | ,000  | ,000  | ,000  |
|                              | 403073651            | ,000             | ,000  | ,000  | ,000  |
|                              | 403073771            | ,000             | ,000  | ,000  | ,000  |
|                              | 403133102            | ,000             | ,000  | ,000  | ,000  |
|                              | 403133106            | ,000             | ,000  | ,000  | ,000  |
|                              | 403133107            | ,000             | ,000  | ,000  | ,000  |
|                              | 403133109            | ,000             | ,000  | ,000  | ,000  |
|                              | 403133202            | ,000             | ,000  | ,000  | ,000  |
|                              | 403133203            | ,000             | ,000  | ,000  | ,000  |
|                              | 403133204            | ,000             | ,000  | ,000  | ,000  |
|                              | 403133315            | ,000             | ,000  | ,000  | ,000  |
|                              | 403133322            | ,000             | ,000  | ,000  | ,000  |
|                              | 403133401            | ,000             | ,000  | ,000  | ,000  |
|                              | 403133402            | ,000             | ,000  | ,000  | ,000  |
|                              | 403133550            | ,000             | ,000  | ,000  | ,000  |
|                              | 403133772            | ,000             | ,000  | ,000  | ,000  |
|                              | 403135803            | ,000             | ,000  | ,000  | ,000  |
|                              | 404060001            | ,000             | ,000  | ,000  | ,000  |
|                              | 404060002            | ,000             | ,000  | ,000  | ,000  |
|                              | 404310003            | ,000             | ,000  | ,000  | ,000  |
|                              | 404310004            | ,000             | ,000  | ,000  | ,000  |
|                              | 502300005            | ,000             | ,000  | ,000  | ,000  |
|                              | 502300006            | ,000             | ,000  | ,000  | ,000  |
|                              | 502300007            | ,000             | ,000  | ,000  | ,000  |
|                              | 502300214            | ,000             | ,000  | ,000  | ,000  |
|                              | 502300411            | ,000             | ,000  | ,000  | ,000  |
|                              | 502300415            | 1,000            | ,000  | ,000  | ,000  |
|                              | 502300416            | ,000             | 1,000 | ,000  | ,000  |
|                              | 502300811            | ,000             | ,000  | 1,000 | ,000  |
|                              | 502300913            | ,000             | ,000  | ,000  | 1,000 |
| sv3 tredjedelar för standard | 1 andra tredjedelen  |                  |       |       |       |
|                              | 2 första tredjedelen |                  |       |       |       |
|                              | 3 tredje tredjedelen |                  |       |       |       |

## Block 0: Beginning Block

Classification Table<sup>a,b</sup>

| Observed           |                                |                           | Predicted                 |                      |
|--------------------|--------------------------------|---------------------------|---------------------------|----------------------|
|                    |                                |                           | 0 ingen eller en händelse | 1 mer än en händelse |
| Step 0             | handlt1 händelse larger than 1 | 0 ingen eller en händelse | 12229                     | 0                    |
|                    |                                | 1 mer än en händelse      | 246                       | 0                    |
| Overall Percentage |                                |                           |                           |                      |

Classification Table<sup>a,b</sup>

| Observed           |                                |                           | Predicted          |
|--------------------|--------------------------------|---------------------------|--------------------|
|                    |                                |                           | Percentage Correct |
| Step 0             | handlt1 händelse larger than 1 | 0 ingen eller en händelse | 100,0              |
|                    |                                | 1 mer än en händelse      | ,0                 |
| Overall Percentage |                                |                           | 98,0               |

a. Constant is included in the model.

b. The cut value is ,500

Variables in the Equation

|                 | B      | S.E. | Wald     | df | Sig. | Exp(B) |
|-----------------|--------|------|----------|----|------|--------|
| Step 0 Constant | -3,906 | ,064 | 3679,612 | 1  | ,000 | ,020   |

## Variables not in the Equation

|        |                    |            | Score   | df | Sig. |
|--------|--------------------|------------|---------|----|------|
| Step 0 | Variables          | sv3        | 2,251   | 2  | ,324 |
|        |                    | sv3(1)     | 2,148   | 1  | ,143 |
|        |                    | sv3(2)     | ,375    | 1  | ,540 |
|        |                    | VASTY2     | 211,294 | 35 | ,000 |
|        |                    | VASTY2(1)  | ,109    | 1  | ,741 |
|        |                    | VASTY2(2)  | 2,111   | 1  | ,146 |
|        |                    | VASTY2(3)  | 5,608   | 1  | ,018 |
|        |                    | VASTY2(4)  | ,094    | 1  | ,759 |
|        |                    | VASTY2(5)  | 1,981   | 1  | ,159 |
|        |                    | VASTY2(6)  | 7,542   | 1  | ,006 |
|        |                    | VASTY2(7)  | 3,478   | 1  | ,062 |
|        |                    | VASTY2(8)  | ,006    | 1  | ,940 |
|        |                    | VASTY2(9)  | ,082    | 1  | ,775 |
|        |                    | VASTY2(10) | 36,459  | 1  | ,000 |
|        |                    | VASTY2(11) | 27,814  | 1  | ,000 |
|        |                    | VASTY2(12) | 2,573   | 1  | ,109 |
|        |                    | VASTY2(13) | ,705    | 1  | ,401 |
|        |                    | VASTY2(14) | ,209    | 1  | ,647 |
|        |                    | VASTY2(15) | ,209    | 1  | ,647 |
|        |                    | VASTY2(16) | ,071    | 1  | ,789 |
|        |                    | VASTY2(17) | 7,564   | 1  | ,006 |
|        |                    | VASTY2(18) | 7,500   | 1  | ,006 |
|        |                    | VASTY2(19) | 5,608   | 1  | ,018 |
|        |                    | VASTY2(20) | 1,471   | 1  | ,225 |
|        |                    | VASTY2(21) | 2,573   | 1  | ,109 |
|        |                    | VASTY2(22) | ,474    | 1  | ,491 |
|        |                    | VASTY2(23) | 41,219  | 1  | ,000 |
|        |                    | VASTY2(24) | 20,216  | 1  | ,000 |
|        |                    | VASTY2(25) | ,290    | 1  | ,590 |
|        |                    | VASTY2(26) | ,550    | 1  | ,458 |
|        |                    | VASTY2(27) | 5,629   | 1  | ,018 |
|        |                    | VASTY2(28) | 2,766   | 1  | ,096 |
|        |                    | VASTY2(29) | 7,585   | 1  | ,006 |
|        |                    | VASTY2(30) | ,089    | 1  | ,765 |
|        |                    | VASTY2(31) | 8,820   | 1  | ,003 |
|        |                    | VASTY2(32) | ,652    | 1  | ,419 |
|        |                    | VASTY2(33) | 1,464   | 1  | ,226 |
|        |                    | VASTY2(34) | 5,587   | 1  | ,018 |
|        |                    | VASTY2(35) | 7,764   | 1  | ,005 |
|        | Overall Statistics |            | 212,733 | 37 | ,000 |

**Block 1: Method = Enter**



## Omnibus Tests of Model Coefficients

|        |       | Chi-square | df | Sig. |
|--------|-------|------------|----|------|
| Step 1 | Step  | 210,059    | 37 | ,000 |
|        | Block | 210,059    | 37 | ,000 |
|        | Model | 210,059    | 37 | ,000 |

## Model Summary

| Step | -2 Log likelihood     | Cox & Snell R Square | Nagelkerke R Square |
|------|-----------------------|----------------------|---------------------|
| 1    | 2208,724 <sup>a</sup> | ,017                 | ,095                |

a. Estimation terminated at iteration number 20 because maximum iterations has been reached. Final solution cannot be found.

Classification Table<sup>a</sup>

|        |                                |                           | Predicted                 |                      |  |
|--------|--------------------------------|---------------------------|---------------------------|----------------------|--|
|        |                                |                           | 0 ingen eller en händelse | 1 mer än en händelse |  |
|        | Observed                       |                           |                           |                      |  |
| Step 1 | handlt1 händelse larger than 1 | 0 ingen eller en händelse | 12229                     | 0                    |  |
|        |                                | 1 mer än en händelse      | 246                       | 0                    |  |
|        | Overall Percentage             |                           |                           |                      |  |

Classification Table<sup>a</sup>

|        |                                |                           | Predicted          |
|--------|--------------------------------|---------------------------|--------------------|
|        |                                |                           | Percentage Correct |
|        | Observed                       |                           |                    |
| Step 1 | handlt1 händelse larger than 1 | 0 ingen eller en händelse | 100,0              |
|        |                                | 1 mer än en händelse      | ,0                 |
|        | Overall Percentage             |                           | 98,0               |

a. The cut value is ,500

## Variables in the Equation

|                         | B       | S.E.     | Wald    | df | Sig. | Exp(B) |
|-------------------------|---------|----------|---------|----|------|--------|
| Step 1 <sup>a</sup> sv3 |         |          | 1,277   | 2  | ,528 |        |
| sv3(1)                  | -,040   | ,181     | ,049    | 1  | ,824 | ,961   |
| sv3(2)                  | ,163    | ,179     | ,825    | 1  | ,364 | 1,177  |
| VASTY2                  |         |          | 118,011 | 35 | ,000 |        |
| VASTY2(1)               | ,445    | ,577     | ,597    | 1  | ,440 | 1,561  |
| VASTY2(2)               | ,717    | ,550     | 1,696   | 1  | ,193 | 2,048  |
| VASTY2(3)               | -1,597  | 1,098    | 2,114   | 1  | ,146 | ,203   |
| VASTY2(4)               | ,490    | ,576     | ,724    | 1  | ,395 | 1,632  |
| VASTY2(5)               | -,367   | ,737     | ,248    | 1  | ,618 | ,693   |
| VASTY2(6)               | -17,038 | 2106,305 | ,000    | 1  | ,994 | ,000   |
| VASTY2(7)               | ,923    | ,538     | 2,942   | 1  | ,086 | 2,516  |
| VASTY2(8)               | ,383    | ,592     | ,419    | 1  | ,518 | 1,466  |
| VASTY2(9)               | ,251    | ,610     | ,170    | 1  | ,680 | 1,286  |
| VASTY2(10)              | 1,472   | ,508     | 8,390   | 1  | ,004 | 4,356  |
| VASTY2(11)              | 1,482   | ,503     | 8,661   | 1  | ,003 | 4,400  |
| VASTY2(12)              | -,601   | ,738     | ,663    | 1  | ,415 | ,548   |
| VASTY2(13)              | -,112   | ,645     | ,030    | 1  | ,862 | ,894   |
| VASTY2(14)              | ,121    | ,613     | ,039    | 1  | ,843 | 1,129  |
| VASTY2(15)              | ,094    | ,616     | ,023    | 1  | ,878 | 1,099  |
| VASTY2(16)              | ,193    | ,737     | ,068    | 1  | ,794 | 1,212  |
| VASTY2(17)              | -16,906 | 2103,049 | ,000    | 1  | ,994 | ,000   |
| VASTY2(18)              | -16,854 | 2112,495 | ,000    | 1  | ,994 | ,000   |
| VASTY2(19)              | -1,548  | 1,105    | 1,964   | 1  | ,161 | ,213   |
| VASTY2(20)              | -,372   | ,737     | ,255    | 1  | ,614 | ,690   |
| VASTY2(21)              | -,489   | ,735     | ,443    | 1  | ,506 | ,613   |
| VASTY2(22)              | ,596    | ,563     | 1,122   | 1  | ,289 | 1,815  |
| VASTY2(23)              | 1,637   | ,498     | 10,821  | 1  | ,001 | 5,142  |
| VASTY2(24)              | 1,334   | ,509     | 6,853   | 1  | ,009 | 3,795  |
| VASTY2(25)              | ,613    | ,592     | 1,071   | 1  | ,301 | 1,846  |
| VASTY2(26)              | -,011   | ,676     | ,000    | 1  | ,987 | ,989   |
| VASTY2(27)              | -1,698  | 1,100    | 2,381   | 1  | ,123 | ,183   |
| VASTY2(28)              | -1,261  | 1,105    | 1,304   | 1  | ,254 | ,283   |
| VASTY2(29)              | -17,056 | 2100,912 | ,000    | 1  | ,994 | ,000   |
| VASTY2(30)              | ,511    | ,577     | ,784    | 1  | ,376 | 1,666  |
| VASTY2(31)              | 1,190   | ,532     | 4,999   | 1  | ,025 | 3,288  |
| VASTY2(32)              | ,086    | ,648     | ,018    | 1  | ,894 | 1,090  |
| VASTY2(33)              | -,148   | ,686     | ,047    | 1  | ,829 | ,862   |
| VASTY2(34)              | -1,618  | 1,098    | 2,171   | 1  | ,141 | ,198   |
| VASTY2(35)              | 1,108   | ,533     | 4,319   | 1  | ,038 | 3,028  |
| Constant                | -4,309  | ,458     | 88,559  | 1  | ,000 | ,013   |

Variables in the Equation

|                     |            | 95% C.I. for EXP(B) |        |
|---------------------|------------|---------------------|--------|
|                     |            | Lower               | Upper  |
| Step 1 <sup>a</sup> | sv3        |                     |        |
|                     | sv3(1)     | ,674                | 1,369  |
|                     | sv3(2)     | ,828                | 1,671  |
|                     | VASTY2     |                     |        |
|                     | VASTY2(1)  | ,504                | 4,833  |
|                     | VASTY2(2)  | ,696                | 6,021  |
|                     | VASTY2(3)  | ,024                | 1,743  |
|                     | VASTY2(4)  | ,528                | 5,041  |
|                     | VASTY2(5)  | ,164                | 2,936  |
|                     | VASTY2(6)  | ,000                | .      |
|                     | VASTY2(7)  | ,877                | 7,223  |
|                     | VASTY2(8)  | ,460                | 4,676  |
|                     | VASTY2(9)  | ,389                | 4,253  |
|                     | VASTY2(10) | 1,609               | 11,791 |
|                     | VASTY2(11) | 1,640               | 11,803 |
|                     | VASTY2(12) | ,129                | 2,329  |
|                     | VASTY2(13) | ,253                | 3,162  |
|                     | VASTY2(14) | ,340                | 3,753  |
|                     | VASTY2(15) | ,329                | 3,672  |
|                     | VASTY2(16) | ,286                | 5,143  |
|                     | VASTY2(17) | ,000                | .      |
|                     | VASTY2(18) | ,000                | .      |
|                     | VASTY2(19) | ,024                | 1,853  |
|                     | VASTY2(20) | ,163                | 2,922  |
|                     | VASTY2(21) | ,145                | 2,588  |
|                     | VASTY2(22) | ,602                | 5,471  |
|                     | VASTY2(23) | 1,938               | 13,641 |
|                     | VASTY2(24) | 1,398               | 10,300 |
|                     | VASTY2(25) | ,578                | 5,896  |
|                     | VASTY2(26) | ,263                | 3,718  |
|                     | VASTY2(27) | ,021                | 1,582  |
|                     | VASTY2(28) | ,033                | 2,469  |
|                     | VASTY2(29) | ,000                | .      |
|                     | VASTY2(30) | ,538                | 5,161  |
|                     | VASTY2(31) | 1,158               | 9,335  |
|                     | VASTY2(32) | ,306                | 3,884  |
|                     | VASTY2(33) | ,225                | 3,307  |
|                     | VASTY2(34) | ,023                | 1,706  |
|                     | VASTY2(35) | 1,065               | 8,610  |
|                     | Constant   |                     |        |

a. Variable(s) entered on step 1: sv3, VASTY2.

```

1
2
3 LOGISTIC REGRESSION VARIABLES handlt1
4   /METHOD=ENTER sv5 VASTY2
5   /CONTRAST (sv5)=Indicator(1)
6   /CONTRAST (VASTY2)=Indicator(1)
7   /PRINT=CI(95)
8   /CRITERIA=PIN(0.05) POUT(0.10) ITERATE(20) CUT(0.5).
9
10
11

```

## Logistic Regression

[DataSet6] C:\cWordjan\Rafaela\_VCS\alla\_tillsammans\abo\_bjo\_vasa\_v1.sav

### Case Processing Summary

| Unweighted Cases <sup>a</sup> |                      | N     | Percent |
|-------------------------------|----------------------|-------|---------|
| Selected Cases                | Included in Analysis | 12475 | 100,0   |
|                               | Missing Cases        | 0     | ,0      |
|                               | Total                | 12475 | 100,0   |
| Unselected Cases              |                      | 0     | ,0      |
| Total                         |                      | 12475 | 100,0   |

a. If weight is in effect, see classification table for the total number of cases.

### Dependent Variable Encoding

| Original Value            | Internal Value |
|---------------------------|----------------|
| 0 ingen eller en händelse | 0              |
| 1 mer än en händelse      | 1              |

## Categorical Variables Codings

|                                               | Frequency | Parameter coding |       |       |
|-----------------------------------------------|-----------|------------------|-------|-------|
|                                               |           | (1)              | (2)   | (3)   |
| VASTY2 (SAIR*10000)+VASTY 403073101           | 365       | ,000             | ,000  | ,000  |
| 403073102                                     | 362       | 1,000            | ,000  | ,000  |
| 403073103                                     | 365       | ,000             | 1,000 | ,000  |
| 403073202                                     | 365       | ,000             | ,000  | 1,000 |
| 403073203                                     | 365       | ,000             | ,000  | ,000  |
| 403073204                                     | 330       | ,000             | ,000  | ,000  |
| 403073303                                     | 364       | ,000             | ,000  | ,000  |
| 403073651                                     | 362       | ,000             | ,000  | ,000  |
| 403073771                                     | 365       | ,000             | ,000  | ,000  |
| 403133102                                     | 341       | ,000             | ,000  | ,000  |
| 403133106                                     | 365       | ,000             | ,000  | ,000  |
| 403133107                                     | 365       | ,000             | ,000  | ,000  |
| 403133109                                     | 365       | ,000             | ,000  | ,000  |
| 403133202                                     | 365       | ,000             | ,000  | ,000  |
| 403133203                                     | 365       | ,000             | ,000  | ,000  |
| 403133204                                     | 365       | ,000             | ,000  | ,000  |
| 403133315                                     | 177       | ,000             | ,000  | ,000  |
| 403133322                                     | 365       | ,000             | ,000  | ,000  |
| 403133401                                     | 362       | ,000             | ,000  | ,000  |
| 403133402                                     | 365       | ,000             | ,000  | ,000  |
| 403133550                                     | 298       | ,000             | ,000  | ,000  |
| 403133772                                     | 365       | ,000             | ,000  | ,000  |
| 403135803                                     | 365       | ,000             | ,000  | ,000  |
| 404060001                                     | 365       | ,000             | ,000  | ,000  |
| 404060002                                     | 366       | ,000             | ,000  | ,000  |
| 404310003                                     | 291       | ,000             | ,000  | ,000  |
| 404310004                                     | 291       | ,000             | ,000  | ,000  |
| 502300005                                     | 366       | ,000             | ,000  | ,000  |
| 502300006                                     | 225       | ,000             | ,000  | ,000  |
| 502300007                                     | 366       | ,000             | ,000  | ,000  |
| 502300214                                     | 366       | ,000             | ,000  | ,000  |
| 502300411                                     | 366       | ,000             | ,000  | ,000  |
| 502300415                                     | 360       | ,000             | ,000  | ,000  |
| 502300416                                     | 363       | ,000             | ,000  | ,000  |
| 502300811                                     | 364       | ,000             | ,000  | ,000  |
| 502300913                                     | 315       | ,000             | ,000  | ,000  |
| sv5 kvintiler för standard 1 tredje kvintilen | 1863      | ,000             | ,000  | ,000  |
| 2 första kvintilen                            | 3570      | 1,000            | ,000  | ,000  |
| 3 andra kvintilen                             | 1759      | ,000             | 1,000 | ,000  |
| 4 fjärde kvintilen                            | 2327      | ,000             | ,000  | 1,000 |
| 5 femte kvintilen                             | 2956      | ,000             | ,000  | ,000  |

## Categorical Variables Codings

|                            |                    | Parameter coding |       |       |       |
|----------------------------|--------------------|------------------|-------|-------|-------|
|                            |                    | (4)              | (5)   | (6)   | (7)   |
| VASTY2 (SAIR*10000)+VASTY  | 403073101          | ,000             | ,000  | ,000  | ,000  |
|                            | 403073102          | ,000             | ,000  | ,000  | ,000  |
|                            | 403073103          | ,000             | ,000  | ,000  | ,000  |
|                            | 403073202          | ,000             | ,000  | ,000  | ,000  |
|                            | 403073203          | 1,000            | ,000  | ,000  | ,000  |
|                            | 403073204          | ,000             | 1,000 | ,000  | ,000  |
|                            | 403073303          | ,000             | ,000  | 1,000 | ,000  |
|                            | 403073651          | ,000             | ,000  | ,000  | 1,000 |
|                            | 403073771          | ,000             | ,000  | ,000  | ,000  |
|                            | 403133102          | ,000             | ,000  | ,000  | ,000  |
|                            | 403133106          | ,000             | ,000  | ,000  | ,000  |
|                            | 403133107          | ,000             | ,000  | ,000  | ,000  |
|                            | 403133109          | ,000             | ,000  | ,000  | ,000  |
|                            | 403133202          | ,000             | ,000  | ,000  | ,000  |
|                            | 403133203          | ,000             | ,000  | ,000  | ,000  |
|                            | 403133204          | ,000             | ,000  | ,000  | ,000  |
|                            | 403133315          | ,000             | ,000  | ,000  | ,000  |
|                            | 403133322          | ,000             | ,000  | ,000  | ,000  |
|                            | 403133401          | ,000             | ,000  | ,000  | ,000  |
|                            | 403133402          | ,000             | ,000  | ,000  | ,000  |
|                            | 403133550          | ,000             | ,000  | ,000  | ,000  |
|                            | 403133772          | ,000             | ,000  | ,000  | ,000  |
|                            | 403135803          | ,000             | ,000  | ,000  | ,000  |
|                            | 404060001          | ,000             | ,000  | ,000  | ,000  |
|                            | 404060002          | ,000             | ,000  | ,000  | ,000  |
|                            | 404310003          | ,000             | ,000  | ,000  | ,000  |
|                            | 404310004          | ,000             | ,000  | ,000  | ,000  |
|                            | 502300005          | ,000             | ,000  | ,000  | ,000  |
|                            | 502300006          | ,000             | ,000  | ,000  | ,000  |
|                            | 502300007          | ,000             | ,000  | ,000  | ,000  |
|                            | 502300214          | ,000             | ,000  | ,000  | ,000  |
|                            | 502300411          | ,000             | ,000  | ,000  | ,000  |
|                            | 502300415          | ,000             | ,000  | ,000  | ,000  |
|                            | 502300416          | ,000             | ,000  | ,000  | ,000  |
|                            | 502300811          | ,000             | ,000  | ,000  | ,000  |
|                            | 502300913          | ,000             | ,000  | ,000  | ,000  |
| sv5 kvintiler för standard | 1 tredje kvintilen | ,000             |       |       |       |
|                            | 2 första kvintilen | ,000             |       |       |       |
|                            | 3 andra kvintilen  | ,000             |       |       |       |
|                            | 4 fjärde kvintilen | ,000             |       |       |       |
|                            | 5 femte kvintilen  | 1,000            |       |       |       |

## Categorical Variables Codings

|                            |                    | Parameter coding |       |       |       |
|----------------------------|--------------------|------------------|-------|-------|-------|
|                            |                    | (8)              | (9)   | (10)  | (11)  |
| VASTY2 (SAIR*10000)+VASTY  | 403073101          | ,000             | ,000  | ,000  | ,000  |
|                            | 403073102          | ,000             | ,000  | ,000  | ,000  |
|                            | 403073103          | ,000             | ,000  | ,000  | ,000  |
|                            | 403073202          | ,000             | ,000  | ,000  | ,000  |
|                            | 403073203          | ,000             | ,000  | ,000  | ,000  |
|                            | 403073204          | ,000             | ,000  | ,000  | ,000  |
|                            | 403073303          | ,000             | ,000  | ,000  | ,000  |
|                            | 403073651          | ,000             | ,000  | ,000  | ,000  |
|                            | 403073771          | 1,000            | ,000  | ,000  | ,000  |
|                            | 403133102          | ,000             | 1,000 | ,000  | ,000  |
|                            | 403133106          | ,000             | ,000  | 1,000 | ,000  |
|                            | 403133107          | ,000             | ,000  | ,000  | 1,000 |
|                            | 403133109          | ,000             | ,000  | ,000  | ,000  |
|                            | 403133202          | ,000             | ,000  | ,000  | ,000  |
|                            | 403133203          | ,000             | ,000  | ,000  | ,000  |
|                            | 403133204          | ,000             | ,000  | ,000  | ,000  |
|                            | 403133315          | ,000             | ,000  | ,000  | ,000  |
|                            | 403133322          | ,000             | ,000  | ,000  | ,000  |
|                            | 403133401          | ,000             | ,000  | ,000  | ,000  |
|                            | 403133402          | ,000             | ,000  | ,000  | ,000  |
|                            | 403133550          | ,000             | ,000  | ,000  | ,000  |
|                            | 403133772          | ,000             | ,000  | ,000  | ,000  |
|                            | 403135803          | ,000             | ,000  | ,000  | ,000  |
|                            | 404060001          | ,000             | ,000  | ,000  | ,000  |
|                            | 404060002          | ,000             | ,000  | ,000  | ,000  |
|                            | 404310003          | ,000             | ,000  | ,000  | ,000  |
|                            | 404310004          | ,000             | ,000  | ,000  | ,000  |
|                            | 502300005          | ,000             | ,000  | ,000  | ,000  |
|                            | 502300006          | ,000             | ,000  | ,000  | ,000  |
|                            | 502300007          | ,000             | ,000  | ,000  | ,000  |
|                            | 502300214          | ,000             | ,000  | ,000  | ,000  |
|                            | 502300411          | ,000             | ,000  | ,000  | ,000  |
|                            | 502300415          | ,000             | ,000  | ,000  | ,000  |
|                            | 502300416          | ,000             | ,000  | ,000  | ,000  |
|                            | 502300811          | ,000             | ,000  | ,000  | ,000  |
|                            | 502300913          | ,000             | ,000  | ,000  | ,000  |
| sv5 kvintiler för standard | 1 tredje kvintilen |                  |       |       |       |
|                            | 2 första kvintilen |                  |       |       |       |
|                            | 3 andra kvintilen  |                  |       |       |       |
|                            | 4 fjärde kvintilen |                  |       |       |       |
|                            | 5 femte kvintilen  |                  |       |       |       |

## Categorical Variables Codings

|                            |                    | Parameter coding |       |       |       |
|----------------------------|--------------------|------------------|-------|-------|-------|
|                            |                    | (12)             | (13)  | (14)  | (15)  |
| VASTY2 (SAIR*10000)+VASTY  | 403073101          | ,000             | ,000  | ,000  | ,000  |
|                            | 403073102          | ,000             | ,000  | ,000  | ,000  |
|                            | 403073103          | ,000             | ,000  | ,000  | ,000  |
|                            | 403073202          | ,000             | ,000  | ,000  | ,000  |
|                            | 403073203          | ,000             | ,000  | ,000  | ,000  |
|                            | 403073204          | ,000             | ,000  | ,000  | ,000  |
|                            | 403073303          | ,000             | ,000  | ,000  | ,000  |
|                            | 403073651          | ,000             | ,000  | ,000  | ,000  |
|                            | 403073771          | ,000             | ,000  | ,000  | ,000  |
|                            | 403133102          | ,000             | ,000  | ,000  | ,000  |
|                            | 403133106          | ,000             | ,000  | ,000  | ,000  |
|                            | 403133107          | ,000             | ,000  | ,000  | ,000  |
|                            | 403133109          | 1,000            | ,000  | ,000  | ,000  |
|                            | 403133202          | ,000             | 1,000 | ,000  | ,000  |
|                            | 403133203          | ,000             | ,000  | 1,000 | ,000  |
|                            | 403133204          | ,000             | ,000  | ,000  | 1,000 |
|                            | 403133315          | ,000             | ,000  | ,000  | ,000  |
|                            | 403133322          | ,000             | ,000  | ,000  | ,000  |
|                            | 403133401          | ,000             | ,000  | ,000  | ,000  |
|                            | 403133402          | ,000             | ,000  | ,000  | ,000  |
|                            | 403133550          | ,000             | ,000  | ,000  | ,000  |
|                            | 403133772          | ,000             | ,000  | ,000  | ,000  |
|                            | 403135803          | ,000             | ,000  | ,000  | ,000  |
|                            | 404060001          | ,000             | ,000  | ,000  | ,000  |
|                            | 404060002          | ,000             | ,000  | ,000  | ,000  |
|                            | 404310003          | ,000             | ,000  | ,000  | ,000  |
|                            | 404310004          | ,000             | ,000  | ,000  | ,000  |
|                            | 502300005          | ,000             | ,000  | ,000  | ,000  |
|                            | 502300006          | ,000             | ,000  | ,000  | ,000  |
|                            | 502300007          | ,000             | ,000  | ,000  | ,000  |
|                            | 502300214          | ,000             | ,000  | ,000  | ,000  |
|                            | 502300411          | ,000             | ,000  | ,000  | ,000  |
|                            | 502300415          | ,000             | ,000  | ,000  | ,000  |
|                            | 502300416          | ,000             | ,000  | ,000  | ,000  |
|                            | 502300811          | ,000             | ,000  | ,000  | ,000  |
|                            | 502300913          | ,000             | ,000  | ,000  | ,000  |
| sv5 kvintiler för standard | 1 tredje kvintilen |                  |       |       |       |
|                            | 2 första kvintilen |                  |       |       |       |
|                            | 3 andra kvintilen  |                  |       |       |       |
|                            | 4 fjärde kvintilen |                  |       |       |       |
|                            | 5 femte kvintilen  |                  |       |       |       |



## Categorical Variables Codings

|                            |                    | Parameter coding |       |       |       |
|----------------------------|--------------------|------------------|-------|-------|-------|
|                            |                    | (16)             | (17)  | (18)  | (19)  |
| VASTY2 (SAIR*10000)+VASTY  | 403073101          | ,000             | ,000  | ,000  | ,000  |
|                            | 403073102          | ,000             | ,000  | ,000  | ,000  |
|                            | 403073103          | ,000             | ,000  | ,000  | ,000  |
|                            | 403073202          | ,000             | ,000  | ,000  | ,000  |
|                            | 403073203          | ,000             | ,000  | ,000  | ,000  |
|                            | 403073204          | ,000             | ,000  | ,000  | ,000  |
|                            | 403073303          | ,000             | ,000  | ,000  | ,000  |
|                            | 403073651          | ,000             | ,000  | ,000  | ,000  |
|                            | 403073771          | ,000             | ,000  | ,000  | ,000  |
|                            | 403133102          | ,000             | ,000  | ,000  | ,000  |
|                            | 403133106          | ,000             | ,000  | ,000  | ,000  |
|                            | 403133107          | ,000             | ,000  | ,000  | ,000  |
|                            | 403133109          | ,000             | ,000  | ,000  | ,000  |
|                            | 403133202          | ,000             | ,000  | ,000  | ,000  |
|                            | 403133203          | ,000             | ,000  | ,000  | ,000  |
|                            | 403133204          | ,000             | ,000  | ,000  | ,000  |
|                            | 403133315          | 1,000            | ,000  | ,000  | ,000  |
|                            | 403133322          | ,000             | 1,000 | ,000  | ,000  |
|                            | 403133401          | ,000             | ,000  | 1,000 | ,000  |
|                            | 403133402          | ,000             | ,000  | ,000  | 1,000 |
|                            | 403133550          | ,000             | ,000  | ,000  | ,000  |
|                            | 403133772          | ,000             | ,000  | ,000  | ,000  |
|                            | 403135803          | ,000             | ,000  | ,000  | ,000  |
|                            | 404060001          | ,000             | ,000  | ,000  | ,000  |
|                            | 404060002          | ,000             | ,000  | ,000  | ,000  |
|                            | 404310003          | ,000             | ,000  | ,000  | ,000  |
|                            | 404310004          | ,000             | ,000  | ,000  | ,000  |
|                            | 502300005          | ,000             | ,000  | ,000  | ,000  |
|                            | 502300006          | ,000             | ,000  | ,000  | ,000  |
|                            | 502300007          | ,000             | ,000  | ,000  | ,000  |
|                            | 502300214          | ,000             | ,000  | ,000  | ,000  |
|                            | 502300411          | ,000             | ,000  | ,000  | ,000  |
|                            | 502300415          | ,000             | ,000  | ,000  | ,000  |
|                            | 502300416          | ,000             | ,000  | ,000  | ,000  |
|                            | 502300811          | ,000             | ,000  | ,000  | ,000  |
|                            | 502300913          | ,000             | ,000  | ,000  | ,000  |
| sv5 kvintiler för standard | 1 tredje kvintilen |                  |       |       |       |
|                            | 2 första kvintilen |                  |       |       |       |
|                            | 3 andra kvintilen  |                  |       |       |       |
|                            | 4 fjärde kvintilen |                  |       |       |       |
|                            | 5 femte kvintilen  |                  |       |       |       |

## Categorical Variables Codings

|                            |                    | Parameter coding |       |       |       |
|----------------------------|--------------------|------------------|-------|-------|-------|
|                            |                    | (20)             | (21)  | (22)  | (23)  |
| VASTY2 (SAIR*10000)+VASTY  | 403073101          | ,000             | ,000  | ,000  | ,000  |
|                            | 403073102          | ,000             | ,000  | ,000  | ,000  |
|                            | 403073103          | ,000             | ,000  | ,000  | ,000  |
|                            | 403073202          | ,000             | ,000  | ,000  | ,000  |
|                            | 403073203          | ,000             | ,000  | ,000  | ,000  |
|                            | 403073204          | ,000             | ,000  | ,000  | ,000  |
|                            | 403073303          | ,000             | ,000  | ,000  | ,000  |
|                            | 403073651          | ,000             | ,000  | ,000  | ,000  |
|                            | 403073771          | ,000             | ,000  | ,000  | ,000  |
|                            | 403133102          | ,000             | ,000  | ,000  | ,000  |
|                            | 403133106          | ,000             | ,000  | ,000  | ,000  |
|                            | 403133107          | ,000             | ,000  | ,000  | ,000  |
|                            | 403133109          | ,000             | ,000  | ,000  | ,000  |
|                            | 403133202          | ,000             | ,000  | ,000  | ,000  |
|                            | 403133203          | ,000             | ,000  | ,000  | ,000  |
|                            | 403133204          | ,000             | ,000  | ,000  | ,000  |
|                            | 403133315          | ,000             | ,000  | ,000  | ,000  |
|                            | 403133322          | ,000             | ,000  | ,000  | ,000  |
|                            | 403133401          | ,000             | ,000  | ,000  | ,000  |
|                            | 403133402          | ,000             | ,000  | ,000  | ,000  |
|                            | 403133550          | 1,000            | ,000  | ,000  | ,000  |
|                            | 403133772          | ,000             | 1,000 | ,000  | ,000  |
|                            | 403135803          | ,000             | ,000  | 1,000 | ,000  |
|                            | 404060001          | ,000             | ,000  | ,000  | 1,000 |
|                            | 404060002          | ,000             | ,000  | ,000  | ,000  |
|                            | 404310003          | ,000             | ,000  | ,000  | ,000  |
|                            | 404310004          | ,000             | ,000  | ,000  | ,000  |
|                            | 502300005          | ,000             | ,000  | ,000  | ,000  |
|                            | 502300006          | ,000             | ,000  | ,000  | ,000  |
|                            | 502300007          | ,000             | ,000  | ,000  | ,000  |
|                            | 502300214          | ,000             | ,000  | ,000  | ,000  |
|                            | 502300411          | ,000             | ,000  | ,000  | ,000  |
|                            | 502300415          | ,000             | ,000  | ,000  | ,000  |
|                            | 502300416          | ,000             | ,000  | ,000  | ,000  |
|                            | 502300811          | ,000             | ,000  | ,000  | ,000  |
|                            | 502300913          | ,000             | ,000  | ,000  | ,000  |
| sv5 kvintiler för standard | 1 tredje kvintilen |                  |       |       |       |
|                            | 2 första kvintilen |                  |       |       |       |
|                            | 3 andra kvintilen  |                  |       |       |       |
|                            | 4 fjärde kvintilen |                  |       |       |       |
|                            | 5 femte kvintilen  |                  |       |       |       |

## Categorical Variables Codings

|                            |                    | Parameter coding |       |       |       |
|----------------------------|--------------------|------------------|-------|-------|-------|
|                            |                    | (24)             | (25)  | (26)  | (27)  |
| VASTY2 (SAIR*10000)+VASTY  | 403073101          | ,000             | ,000  | ,000  | ,000  |
|                            | 403073102          | ,000             | ,000  | ,000  | ,000  |
|                            | 403073103          | ,000             | ,000  | ,000  | ,000  |
|                            | 403073202          | ,000             | ,000  | ,000  | ,000  |
|                            | 403073203          | ,000             | ,000  | ,000  | ,000  |
|                            | 403073204          | ,000             | ,000  | ,000  | ,000  |
|                            | 403073303          | ,000             | ,000  | ,000  | ,000  |
|                            | 403073651          | ,000             | ,000  | ,000  | ,000  |
|                            | 403073771          | ,000             | ,000  | ,000  | ,000  |
|                            | 403133102          | ,000             | ,000  | ,000  | ,000  |
|                            | 403133106          | ,000             | ,000  | ,000  | ,000  |
|                            | 403133107          | ,000             | ,000  | ,000  | ,000  |
|                            | 403133109          | ,000             | ,000  | ,000  | ,000  |
|                            | 403133202          | ,000             | ,000  | ,000  | ,000  |
|                            | 403133203          | ,000             | ,000  | ,000  | ,000  |
|                            | 403133204          | ,000             | ,000  | ,000  | ,000  |
|                            | 403133315          | ,000             | ,000  | ,000  | ,000  |
|                            | 403133322          | ,000             | ,000  | ,000  | ,000  |
|                            | 403133401          | ,000             | ,000  | ,000  | ,000  |
|                            | 403133402          | ,000             | ,000  | ,000  | ,000  |
|                            | 403133550          | ,000             | ,000  | ,000  | ,000  |
|                            | 403133772          | ,000             | ,000  | ,000  | ,000  |
|                            | 403135803          | ,000             | ,000  | ,000  | ,000  |
|                            | 404060001          | ,000             | ,000  | ,000  | ,000  |
|                            | 404060002          | 1,000            | ,000  | ,000  | ,000  |
|                            | 404310003          | ,000             | 1,000 | ,000  | ,000  |
|                            | 404310004          | ,000             | ,000  | 1,000 | ,000  |
|                            | 502300005          | ,000             | ,000  | ,000  | 1,000 |
|                            | 502300006          | ,000             | ,000  | ,000  | ,000  |
|                            | 502300007          | ,000             | ,000  | ,000  | ,000  |
|                            | 502300214          | ,000             | ,000  | ,000  | ,000  |
|                            | 502300411          | ,000             | ,000  | ,000  | ,000  |
|                            | 502300415          | ,000             | ,000  | ,000  | ,000  |
|                            | 502300416          | ,000             | ,000  | ,000  | ,000  |
|                            | 502300811          | ,000             | ,000  | ,000  | ,000  |
|                            | 502300913          | ,000             | ,000  | ,000  | ,000  |
| sv5 kvintiler för standard | 1 tredje kvintilen |                  |       |       |       |
|                            | 2 första kvintilen |                  |       |       |       |
|                            | 3 andra kvintilen  |                  |       |       |       |
|                            | 4 fjärde kvintilen |                  |       |       |       |
|                            | 5 femte kvintilen  |                  |       |       |       |

## Categorical Variables Codings

|                            |                    | Parameter coding |       |       |       |
|----------------------------|--------------------|------------------|-------|-------|-------|
|                            |                    | (28)             | (29)  | (30)  | (31)  |
| VASTY2 (SAIR*10000)+VASTY  | 403073101          | ,000             | ,000  | ,000  | ,000  |
|                            | 403073102          | ,000             | ,000  | ,000  | ,000  |
|                            | 403073103          | ,000             | ,000  | ,000  | ,000  |
|                            | 403073202          | ,000             | ,000  | ,000  | ,000  |
|                            | 403073203          | ,000             | ,000  | ,000  | ,000  |
|                            | 403073204          | ,000             | ,000  | ,000  | ,000  |
|                            | 403073303          | ,000             | ,000  | ,000  | ,000  |
|                            | 403073651          | ,000             | ,000  | ,000  | ,000  |
|                            | 403073771          | ,000             | ,000  | ,000  | ,000  |
|                            | 403133102          | ,000             | ,000  | ,000  | ,000  |
|                            | 403133106          | ,000             | ,000  | ,000  | ,000  |
|                            | 403133107          | ,000             | ,000  | ,000  | ,000  |
|                            | 403133109          | ,000             | ,000  | ,000  | ,000  |
|                            | 403133202          | ,000             | ,000  | ,000  | ,000  |
|                            | 403133203          | ,000             | ,000  | ,000  | ,000  |
|                            | 403133204          | ,000             | ,000  | ,000  | ,000  |
|                            | 403133315          | ,000             | ,000  | ,000  | ,000  |
|                            | 403133322          | ,000             | ,000  | ,000  | ,000  |
|                            | 403133401          | ,000             | ,000  | ,000  | ,000  |
|                            | 403133402          | ,000             | ,000  | ,000  | ,000  |
|                            | 403133550          | ,000             | ,000  | ,000  | ,000  |
|                            | 403133772          | ,000             | ,000  | ,000  | ,000  |
|                            | 403135803          | ,000             | ,000  | ,000  | ,000  |
|                            | 404060001          | ,000             | ,000  | ,000  | ,000  |
|                            | 404060002          | ,000             | ,000  | ,000  | ,000  |
|                            | 404310003          | ,000             | ,000  | ,000  | ,000  |
|                            | 404310004          | ,000             | ,000  | ,000  | ,000  |
|                            | 502300005          | ,000             | ,000  | ,000  | ,000  |
|                            | 502300006          | 1,000            | ,000  | ,000  | ,000  |
|                            | 502300007          | ,000             | 1,000 | ,000  | ,000  |
|                            | 502300214          | ,000             | ,000  | 1,000 | ,000  |
|                            | 502300411          | ,000             | ,000  | ,000  | 1,000 |
|                            | 502300415          | ,000             | ,000  | ,000  | ,000  |
|                            | 502300416          | ,000             | ,000  | ,000  | ,000  |
|                            | 502300811          | ,000             | ,000  | ,000  | ,000  |
|                            | 502300913          | ,000             | ,000  | ,000  | ,000  |
| sv5 kvintiler för standard | 1 tredje kvintilen |                  |       |       |       |
|                            | 2 första kvintilen |                  |       |       |       |
|                            | 3 andra kvintilen  |                  |       |       |       |
|                            | 4 fjärde kvintilen |                  |       |       |       |
|                            | 5 femte kvintilen  |                  |       |       |       |

## Categorical Variables Codings

|                            |                    | Parameter coding |       |       |       |
|----------------------------|--------------------|------------------|-------|-------|-------|
|                            |                    | (32)             | (33)  | (34)  | (35)  |
| VASTY2 (SAIR*10000)+VASTY  | 403073101          | ,000             | ,000  | ,000  | ,000  |
|                            | 403073102          | ,000             | ,000  | ,000  | ,000  |
|                            | 403073103          | ,000             | ,000  | ,000  | ,000  |
|                            | 403073202          | ,000             | ,000  | ,000  | ,000  |
|                            | 403073203          | ,000             | ,000  | ,000  | ,000  |
|                            | 403073204          | ,000             | ,000  | ,000  | ,000  |
|                            | 403073303          | ,000             | ,000  | ,000  | ,000  |
|                            | 403073651          | ,000             | ,000  | ,000  | ,000  |
|                            | 403073771          | ,000             | ,000  | ,000  | ,000  |
|                            | 403133102          | ,000             | ,000  | ,000  | ,000  |
|                            | 403133106          | ,000             | ,000  | ,000  | ,000  |
|                            | 403133107          | ,000             | ,000  | ,000  | ,000  |
|                            | 403133109          | ,000             | ,000  | ,000  | ,000  |
|                            | 403133202          | ,000             | ,000  | ,000  | ,000  |
|                            | 403133203          | ,000             | ,000  | ,000  | ,000  |
|                            | 403133204          | ,000             | ,000  | ,000  | ,000  |
|                            | 403133315          | ,000             | ,000  | ,000  | ,000  |
|                            | 403133322          | ,000             | ,000  | ,000  | ,000  |
|                            | 403133401          | ,000             | ,000  | ,000  | ,000  |
|                            | 403133402          | ,000             | ,000  | ,000  | ,000  |
|                            | 403133550          | ,000             | ,000  | ,000  | ,000  |
|                            | 403133772          | ,000             | ,000  | ,000  | ,000  |
|                            | 403135803          | ,000             | ,000  | ,000  | ,000  |
|                            | 404060001          | ,000             | ,000  | ,000  | ,000  |
|                            | 404060002          | ,000             | ,000  | ,000  | ,000  |
|                            | 404310003          | ,000             | ,000  | ,000  | ,000  |
|                            | 404310004          | ,000             | ,000  | ,000  | ,000  |
|                            | 502300005          | ,000             | ,000  | ,000  | ,000  |
|                            | 502300006          | ,000             | ,000  | ,000  | ,000  |
|                            | 502300007          | ,000             | ,000  | ,000  | ,000  |
|                            | 502300214          | ,000             | ,000  | ,000  | ,000  |
|                            | 502300411          | ,000             | ,000  | ,000  | ,000  |
|                            | 502300415          | 1,000            | ,000  | ,000  | ,000  |
|                            | 502300416          | ,000             | 1,000 | ,000  | ,000  |
|                            | 502300811          | ,000             | ,000  | 1,000 | ,000  |
|                            | 502300913          | ,000             | ,000  | ,000  | 1,000 |
| sv5 kvintiler för standard | 1 tredje kvintilen |                  |       |       |       |
|                            | 2 första kvintilen |                  |       |       |       |
|                            | 3 andra kvintilen  |                  |       |       |       |
|                            | 4 fjärde kvintilen |                  |       |       |       |
|                            | 5 femte kvintilen  |                  |       |       |       |

## Block 0: Beginning Block

Classification Table<sup>a,b</sup>

| Observed           |                                |                           | Predicted                      |                      |
|--------------------|--------------------------------|---------------------------|--------------------------------|----------------------|
|                    |                                |                           | handlt1 händelse larger than 1 |                      |
|                    |                                |                           | 0 ingen eller en händelse      | 1 mer än en händelse |
| Step 0             | handlt1 händelse larger than 1 | 0 ingen eller en händelse | 12229                          | 0                    |
|                    |                                | 1 mer än en händelse      | 246                            | 0                    |
| Overall Percentage |                                |                           |                                |                      |

Classification Table<sup>a,b</sup>

| Observed           |                                |                           | Predicted          |
|--------------------|--------------------------------|---------------------------|--------------------|
|                    |                                |                           | Percentage Correct |
| Step 0             | handlt1 händelse larger than 1 | 0 ingen eller en händelse | 100,0              |
|                    |                                | 1 mer än en händelse      | ,0                 |
| Overall Percentage |                                |                           | 98,0               |

a. Constant is included in the model.

b. The cut value is ,500

Variables in the Equation

|                 | B      | S.E. | Wald     | df | Sig. | Exp(B) |
|-----------------|--------|------|----------|----|------|--------|
| Step 0 Constant | -3,906 | ,064 | 3679,612 | 1  | ,000 | ,020   |

## Variables not in the Equation

|        |                    |            | Score   | df | Sig. |
|--------|--------------------|------------|---------|----|------|
| Step 0 | Variables          | sv5        | 3,960   | 4  | ,411 |
|        |                    | sv5(1)     | 3,644   | 1  | ,056 |
|        |                    | sv5(2)     | ,376    | 1  | ,540 |
|        |                    | sv5(3)     | ,265    | 1  | ,607 |
|        |                    | sv5(4)     | ,067    | 1  | ,796 |
|        |                    | VASTY2     | 211,294 | 35 | ,000 |
|        |                    | VASTY2(1)  | ,109    | 1  | ,741 |
|        |                    | VASTY2(2)  | 2,111   | 1  | ,146 |
|        |                    | VASTY2(3)  | 5,608   | 1  | ,018 |
|        |                    | VASTY2(4)  | ,094    | 1  | ,759 |
|        |                    | VASTY2(5)  | 1,981   | 1  | ,159 |
|        |                    | VASTY2(6)  | 7,542   | 1  | ,006 |
|        |                    | VASTY2(7)  | 3,478   | 1  | ,062 |
|        |                    | VASTY2(8)  | ,006    | 1  | ,940 |
|        |                    | VASTY2(9)  | ,082    | 1  | ,775 |
|        |                    | VASTY2(10) | 36,459  | 1  | ,000 |
|        |                    | VASTY2(11) | 27,814  | 1  | ,000 |
|        |                    | VASTY2(12) | 2,573   | 1  | ,109 |
|        |                    | VASTY2(13) | ,705    | 1  | ,401 |
|        |                    | VASTY2(14) | ,209    | 1  | ,647 |
|        |                    | VASTY2(15) | ,209    | 1  | ,647 |
|        |                    | VASTY2(16) | ,071    | 1  | ,789 |
|        |                    | VASTY2(17) | 7,564   | 1  | ,006 |
|        |                    | VASTY2(18) | 7,500   | 1  | ,006 |
|        |                    | VASTY2(19) | 5,608   | 1  | ,018 |
|        |                    | VASTY2(20) | 1,471   | 1  | ,225 |
|        |                    | VASTY2(21) | 2,573   | 1  | ,109 |
|        |                    | VASTY2(22) | ,474    | 1  | ,491 |
|        |                    | VASTY2(23) | 41,219  | 1  | ,000 |
|        |                    | VASTY2(24) | 20,216  | 1  | ,000 |
|        |                    | VASTY2(25) | ,290    | 1  | ,590 |
|        |                    | VASTY2(26) | ,550    | 1  | ,458 |
|        |                    | VASTY2(27) | 5,629   | 1  | ,018 |
|        |                    | VASTY2(28) | 2,766   | 1  | ,096 |
|        |                    | VASTY2(29) | 7,585   | 1  | ,006 |
|        |                    | VASTY2(30) | ,089    | 1  | ,765 |
|        |                    | VASTY2(31) | 8,820   | 1  | ,003 |
|        |                    | VASTY2(32) | ,652    | 1  | ,419 |
|        |                    | VASTY2(33) | 1,464   | 1  | ,226 |
|        |                    | VASTY2(34) | 5,587   | 1  | ,018 |
|        |                    | VASTY2(35) | 7,764   | 1  | ,005 |
|        | Overall Statistics |            | 215,001 | 39 | ,000 |

**Block 1: Method = Enter****Omnibus Tests of Model Coefficients**

|        |       | Chi-square | df | Sig. |
|--------|-------|------------|----|------|
| Step 1 | Step  | 212,136    | 39 | ,000 |
|        | Block | 212,136    | 39 | ,000 |
|        | Model | 212,136    | 39 | ,000 |

**Model Summary**

| Step | -2 Log likelihood     | Cox & Snell R Square | Nagelkerke R Square |
|------|-----------------------|----------------------|---------------------|
| 1    | 2206,646 <sup>a</sup> | ,017                 | ,096                |

a. Estimation terminated at iteration number 20 because maximum iterations has been reached. Final solution cannot be found.

**Classification Table<sup>a</sup>**

|                    |                               | Predicted                     |                      |
|--------------------|-------------------------------|-------------------------------|----------------------|
|                    |                               | handt1 händelse larger than 1 |                      |
| Observed           |                               | 0 ingen eller en händelse     | 1 mer än en händelse |
| Step 1             | handt1 händelse larger than 1 | 0 ingen eller en händelse     | 12229                |
|                    |                               | 1 mer än en händelse          | 246                  |
| Overall Percentage |                               |                               | 0                    |

**Classification Table<sup>a</sup>**

|                    |                               | Predicted                 |
|--------------------|-------------------------------|---------------------------|
|                    |                               | Percentage Correct        |
| Step 1             | handt1 händelse larger than 1 | 0 ingen eller en händelse |
|                    |                               | 1 mer än en händelse      |
| Overall Percentage |                               | 98,0                      |

a. The cut value is ,500



## Variables in the Equation

|                     |            | B       | S.E.     | Wald    | df | Sig. | Exp(B) |
|---------------------|------------|---------|----------|---------|----|------|--------|
| Step 1 <sup>a</sup> | sv5        |         |          | 3,394   | 4  | ,494 |        |
|                     | sv5(1)     | -,117   | ,229     | ,259    | 1  | ,611 | ,890   |
|                     | sv5(2)     | ,028    | ,230     | ,014    | 1  | ,904 | 1,028  |
|                     | sv5(3)     | -,035   | ,217     | ,026    | 1  | ,871 | ,965   |
|                     | sv5(4)     | ,294    | ,234     | 1,585   | 1  | ,208 | 1,342  |
|                     | VASTY2     |         |          | 118,179 | 35 | ,000 |        |
|                     | VASTY2(1)  | ,429    | ,577     | ,552    | 1  | ,458 | 1,535  |
|                     | VASTY2(2)  | ,638    | ,555     | 1,321   | 1  | ,250 | 1,893  |
|                     | VASTY2(3)  | -1,608  | 1,098    | 2,144   | 1  | ,143 | ,200   |
|                     | VASTY2(4)  | ,492    | ,576     | ,730    | 1  | ,393 | 1,635  |
|                     | VASTY2(5)  | -,380   | ,737     | ,266    | 1  | ,606 | ,684   |
|                     | VASTY2(6)  | -17,166 | 2104,809 | ,000    | 1  | ,993 | ,000   |
|                     | VASTY2(7)  | ,930    | ,538     | 2,987   | 1  | ,084 | 2,534  |
|                     | VASTY2(8)  | ,360    | ,592     | ,371    | 1  | ,543 | 1,434  |
|                     | VASTY2(9)  | ,260    | ,610     | ,181    | 1  | ,670 | 1,297  |
|                     | VASTY2(10) | 1,379   | ,515     | 7,181   | 1  | ,007 | 3,972  |
|                     | VASTY2(11) | 1,476   | ,504     | 8,586   | 1  | ,003 | 4,373  |
|                     | VASTY2(12) | -,646   | ,740     | ,764    | 1  | ,382 | ,524   |
|                     | VASTY2(13) | -,206   | ,650     | ,100    | 1  | ,752 | ,814   |
|                     | VASTY2(14) | ,071    | ,615     | ,013    | 1  | ,909 | 1,073  |
|                     | VASTY2(15) | ,027    | ,619     | ,002    | 1  | ,965 | 1,027  |
|                     | VASTY2(16) | ,147    | ,739     | ,039    | 1  | ,843 | 1,158  |
|                     | VASTY2(17) | -16,914 | 2102,229 | ,000    | 1  | ,994 | ,000   |
|                     | VASTY2(18) | -16,815 | 2112,424 | ,000    | 1  | ,994 | ,000   |
|                     | VASTY2(19) | -1,505  | 1,110    | 1,839   | 1  | ,175 | ,222   |
|                     | VASTY2(20) | -,442   | ,740     | ,356    | 1  | ,551 | ,643   |
|                     | VASTY2(21) | -,490   | ,735     | ,444    | 1  | ,505 | ,613   |
|                     | VASTY2(22) | ,591    | ,563     | 1,103   | 1  | ,294 | 1,806  |
|                     | VASTY2(23) | 1,633   | ,498     | 10,759  | 1  | ,001 | 5,121  |
|                     | VASTY2(24) | 1,300   | ,511     | 6,486   | 1  | ,011 | 3,670  |
|                     | VASTY2(25) | ,595    | ,593     | 1,007   | 1  | ,316 | 1,813  |
|                     | VASTY2(26) | -,016   | ,676     | ,001    | 1  | ,981 | ,984   |
|                     | VASTY2(27) | -1,759  | 1,102    | 2,549   | 1  | ,110 | ,172   |
|                     | VASTY2(28) | -1,415  | 1,111    | 1,620   | 1  | ,203 | ,243   |
|                     | VASTY2(29) | -17,217 | 2100,737 | ,000    | 1  | ,993 | ,000   |
|                     | VASTY2(30) | ,503    | ,577     | ,759    | 1  | ,384 | 1,653  |
|                     | VASTY2(31) | 1,212   | ,537     | 5,089   | 1  | ,024 | 3,360  |
|                     | VASTY2(32) | ,125    | ,656     | ,036    | 1  | ,849 | 1,133  |
|                     | VASTY2(33) | -,105   | ,694     | ,023    | 1  | ,880 | ,900   |
|                     | VASTY2(34) | -1,625  | 1,098    | 2,190   | 1  | ,139 | ,197   |
|                     | VASTY2(35) | 1,117   | ,534     | 4,375   | 1  | ,036 | 3,054  |
|                     | Constant   | -4,276  | ,469     | 83,025  | 1  | ,000 | ,014   |

## Variables in the Equation

|                     |            | 95% C.I. for EXP(B) |        |
|---------------------|------------|---------------------|--------|
|                     |            | Lower               | Upper  |
| Step 1 <sup>a</sup> | sv5        |                     |        |
|                     | sv5(1)     | ,568                | 1,394  |
|                     | sv5(2)     | ,655                | 1,613  |
|                     | sv5(3)     | ,631                | 1,477  |
|                     | sv5(4)     | ,849                | 2,123  |
|                     | VASTY2     |                     |        |
|                     | VASTY2(1)  | ,495                | 4,757  |
|                     | VASTY2(2)  | ,638                | 5,622  |
|                     | VASTY2(3)  | ,023                | 1,724  |
|                     | VASTY2(4)  | ,529                | 5,052  |
|                     | VASTY2(5)  | ,161                | 2,898  |
|                     | VASTY2(6)  | ,000                | .      |
|                     | VASTY2(7)  | ,883                | 7,273  |
|                     | VASTY2(8)  | ,449                | 4,577  |
|                     | VASTY2(9)  | ,392                | 4,290  |
|                     | VASTY2(10) | 1,448               | 10,893 |
|                     | VASTY2(11) | 1,630               | 11,734 |
|                     | VASTY2(12) | ,123                | 2,233  |
|                     | VASTY2(13) | ,228                | 2,912  |
|                     | VASTY2(14) | ,321                | 3,584  |
|                     | VASTY2(15) | ,305                | 3,456  |
|                     | VASTY2(16) | ,272                | 4,932  |
|                     | VASTY2(17) | ,000                | .      |
|                     | VASTY2(18) | ,000                | .      |
|                     | VASTY2(19) | ,025                | 1,955  |
|                     | VASTY2(20) | ,151                | 2,741  |
|                     | VASTY2(21) | ,145                | 2,587  |
|                     | VASTY2(22) | ,599                | 5,444  |
|                     | VASTY2(23) | 1,930               | 13,590 |
|                     | VASTY2(24) | 1,349               | 9,982  |
|                     | VASTY2(25) | ,567                | 5,794  |
|                     | VASTY2(26) | ,261                | 3,701  |
|                     | VASTY2(27) | ,020                | 1,493  |
|                     | VASTY2(28) | ,028                | 2,146  |
|                     | VASTY2(29) | ,000                | .      |
|                     | VASTY2(30) | ,534                | 5,123  |
|                     | VASTY2(31) | 1,172               | 9,627  |
|                     | VASTY2(32) | ,313                | 4,095  |
|                     | VASTY2(33) | ,231                | 3,510  |
|                     | VASTY2(34) | ,023                | 1,694  |
|                     | VASTY2(35) | 1,073               | 8,696  |
|                     | Constant   |                     |        |

a. Variable(s) entered on step 1: sv5, VASTY2.

```
LOGISTIC REGRESSION VARIABLES handlt1
/METHOD=ENTER sv7 VASTY2
/CONTRAST (sv7)=Indicator(1)
/CONTRAST (VASTY2)=Indicator(1)
/PRINT=CI(95)
/CRITERIA=PIN(0.05) POUT(0.10) ITERATE(20) CUT(0.5).
```

## Logistic Regression

[DataSet6] C:\cWordjan\Rafaela\_VCS\alla\_tillsammans\abo\_bjo\_vasa\_v1.sav

### Case Processing Summary

| Unweighted Cases <sup>a</sup> |                      | N     | Percent |
|-------------------------------|----------------------|-------|---------|
| Selected Cases                | Included in Analysis | 12475 | 100,0   |
|                               | Missing Cases        | 0     | ,0      |
|                               | Total                | 12475 | 100,0   |
| Unselected Cases              |                      | 0     | ,0      |
| Total                         |                      | 12475 | 100,0   |

a. If weight is in effect, see classification table for the total number of cases.

### Dependent Variable Encoding

| Original Value            | Internal Value |
|---------------------------|----------------|
| 0 ingen eller en händelse | 0              |
| 1 mer än en händelse      | 1              |

## Categorical Variables Codings

|                                                   | Frequency | Parameter coding |       |       |
|---------------------------------------------------|-----------|------------------|-------|-------|
|                                                   |           | (1)              | (2)   | (3)   |
| VASTY2 (SAIR*10000)+VASTY 403073101               | 365       | ,000             | ,000  | ,000  |
| 403073102                                         | 362       | 1,000            | ,000  | ,000  |
| 403073103                                         | 365       | ,000             | 1,000 | ,000  |
| 403073202                                         | 365       | ,000             | ,000  | 1,000 |
| 403073203                                         | 365       | ,000             | ,000  | ,000  |
| 403073204                                         | 330       | ,000             | ,000  | ,000  |
| 403073303                                         | 364       | ,000             | ,000  | ,000  |
| 403073651                                         | 362       | ,000             | ,000  | ,000  |
| 403073771                                         | 365       | ,000             | ,000  | ,000  |
| 403133102                                         | 341       | ,000             | ,000  | ,000  |
| 403133106                                         | 365       | ,000             | ,000  | ,000  |
| 403133107                                         | 365       | ,000             | ,000  | ,000  |
| 403133109                                         | 365       | ,000             | ,000  | ,000  |
| 403133202                                         | 365       | ,000             | ,000  | ,000  |
| 403133203                                         | 365       | ,000             | ,000  | ,000  |
| 403133204                                         | 365       | ,000             | ,000  | ,000  |
| 403133315                                         | 177       | ,000             | ,000  | ,000  |
| 403133322                                         | 365       | ,000             | ,000  | ,000  |
| 403133401                                         | 362       | ,000             | ,000  | ,000  |
| 403133402                                         | 365       | ,000             | ,000  | ,000  |
| 403133550                                         | 298       | ,000             | ,000  | ,000  |
| 403133772                                         | 365       | ,000             | ,000  | ,000  |
| 403135803                                         | 365       | ,000             | ,000  | ,000  |
| 404060001                                         | 365       | ,000             | ,000  | ,000  |
| 404060002                                         | 366       | ,000             | ,000  | ,000  |
| 404310003                                         | 291       | ,000             | ,000  | ,000  |
| 404310004                                         | 291       | ,000             | ,000  | ,000  |
| 502300005                                         | 366       | ,000             | ,000  | ,000  |
| 502300006                                         | 225       | ,000             | ,000  | ,000  |
| 502300007                                         | 366       | ,000             | ,000  | ,000  |
| 502300214                                         | 366       | ,000             | ,000  | ,000  |
| 502300411                                         | 366       | ,000             | ,000  | ,000  |
| 502300415                                         | 360       | ,000             | ,000  | ,000  |
| 502300416                                         | 363       | ,000             | ,000  | ,000  |
| 502300811                                         | 364       | ,000             | ,000  | ,000  |
| 502300913                                         | 315       | ,000             | ,000  | ,000  |
| sv7 sjättedelar för standard 1 fjärde sjundedelen | 1423      | ,000             | ,000  | ,000  |
| 2 första sjundedelen                              | 3031      | 1,000            | ,000  | ,000  |

## Categorical Variables Codings

|                              |                      | Parameter coding |       |       |       |
|------------------------------|----------------------|------------------|-------|-------|-------|
|                              |                      | (4)              | (5)   | (6)   | (7)   |
| VASTY2 (SAIR*10000)+VASTY    | 403073101            | ,000             | ,000  | ,000  | ,000  |
|                              | 403073102            | ,000             | ,000  | ,000  | ,000  |
|                              | 403073103            | ,000             | ,000  | ,000  | ,000  |
|                              | 403073202            | ,000             | ,000  | ,000  | ,000  |
|                              | 403073203            | 1,000            | ,000  | ,000  | ,000  |
|                              | 403073204            | ,000             | 1,000 | ,000  | ,000  |
|                              | 403073303            | ,000             | ,000  | 1,000 | ,000  |
|                              | 403073651            | ,000             | ,000  | ,000  | 1,000 |
|                              | 403073771            | ,000             | ,000  | ,000  | ,000  |
|                              | 403133102            | ,000             | ,000  | ,000  | ,000  |
|                              | 403133106            | ,000             | ,000  | ,000  | ,000  |
|                              | 403133107            | ,000             | ,000  | ,000  | ,000  |
|                              | 403133109            | ,000             | ,000  | ,000  | ,000  |
|                              | 403133202            | ,000             | ,000  | ,000  | ,000  |
|                              | 403133203            | ,000             | ,000  | ,000  | ,000  |
|                              | 403133204            | ,000             | ,000  | ,000  | ,000  |
|                              | 403133315            | ,000             | ,000  | ,000  | ,000  |
|                              | 403133322            | ,000             | ,000  | ,000  | ,000  |
|                              | 403133401            | ,000             | ,000  | ,000  | ,000  |
|                              | 403133402            | ,000             | ,000  | ,000  | ,000  |
|                              | 403133550            | ,000             | ,000  | ,000  | ,000  |
|                              | 403133772            | ,000             | ,000  | ,000  | ,000  |
|                              | 403135803            | ,000             | ,000  | ,000  | ,000  |
|                              | 404060001            | ,000             | ,000  | ,000  | ,000  |
|                              | 404060002            | ,000             | ,000  | ,000  | ,000  |
|                              | 404310003            | ,000             | ,000  | ,000  | ,000  |
|                              | 404310004            | ,000             | ,000  | ,000  | ,000  |
|                              | 502300005            | ,000             | ,000  | ,000  | ,000  |
|                              | 502300006            | ,000             | ,000  | ,000  | ,000  |
|                              | 502300007            | ,000             | ,000  | ,000  | ,000  |
|                              | 502300214            | ,000             | ,000  | ,000  | ,000  |
|                              | 502300411            | ,000             | ,000  | ,000  | ,000  |
|                              | 502300415            | ,000             | ,000  | ,000  | ,000  |
|                              | 502300416            | ,000             | ,000  | ,000  | ,000  |
|                              | 502300811            | ,000             | ,000  | ,000  | ,000  |
|                              | 502300913            | ,000             | ,000  | ,000  | ,000  |
| sv7 sjättedelar för standard | 1 fjärde sjundedelen | ,000             | ,000  | ,000  | ,000  |
|                              | 2 första sjundedelen | ,000             | ,000  | ,000  | ,000  |

## Categorical Variables Codings

|                              |                      | Parameter coding |       |       |       |
|------------------------------|----------------------|------------------|-------|-------|-------|
|                              |                      | (8)              | (9)   | (10)  | (11)  |
| VASTY2 (SAIR*10000)+VASTY    | 403073101            | ,000             | ,000  | ,000  | ,000  |
|                              | 403073102            | ,000             | ,000  | ,000  | ,000  |
|                              | 403073103            | ,000             | ,000  | ,000  | ,000  |
|                              | 403073202            | ,000             | ,000  | ,000  | ,000  |
|                              | 403073203            | ,000             | ,000  | ,000  | ,000  |
|                              | 403073204            | ,000             | ,000  | ,000  | ,000  |
|                              | 403073303            | ,000             | ,000  | ,000  | ,000  |
|                              | 403073651            | ,000             | ,000  | ,000  | ,000  |
|                              | 403073771            | 1,000            | ,000  | ,000  | ,000  |
|                              | 403133102            | ,000             | 1,000 | ,000  | ,000  |
|                              | 403133106            | ,000             | ,000  | 1,000 | ,000  |
|                              | 403133107            | ,000             | ,000  | ,000  | 1,000 |
|                              | 403133109            | ,000             | ,000  | ,000  | ,000  |
|                              | 403133202            | ,000             | ,000  | ,000  | ,000  |
|                              | 403133203            | ,000             | ,000  | ,000  | ,000  |
|                              | 403133204            | ,000             | ,000  | ,000  | ,000  |
|                              | 403133315            | ,000             | ,000  | ,000  | ,000  |
|                              | 403133322            | ,000             | ,000  | ,000  | ,000  |
|                              | 403133401            | ,000             | ,000  | ,000  | ,000  |
|                              | 403133402            | ,000             | ,000  | ,000  | ,000  |
|                              | 403133550            | ,000             | ,000  | ,000  | ,000  |
|                              | 403133772            | ,000             | ,000  | ,000  | ,000  |
|                              | 403135803            | ,000             | ,000  | ,000  | ,000  |
|                              | 404060001            | ,000             | ,000  | ,000  | ,000  |
|                              | 404060002            | ,000             | ,000  | ,000  | ,000  |
|                              | 404310003            | ,000             | ,000  | ,000  | ,000  |
|                              | 404310004            | ,000             | ,000  | ,000  | ,000  |
|                              | 502300005            | ,000             | ,000  | ,000  | ,000  |
|                              | 502300006            | ,000             | ,000  | ,000  | ,000  |
|                              | 502300007            | ,000             | ,000  | ,000  | ,000  |
|                              | 502300214            | ,000             | ,000  | ,000  | ,000  |
|                              | 502300411            | ,000             | ,000  | ,000  | ,000  |
|                              | 502300415            | ,000             | ,000  | ,000  | ,000  |
|                              | 502300416            | ,000             | ,000  | ,000  | ,000  |
|                              | 502300811            | ,000             | ,000  | ,000  | ,000  |
|                              | 502300913            | ,000             | ,000  | ,000  | ,000  |
| sv7 sjättedelar för standard | 1 fjärde sjundedelen |                  |       |       |       |
|                              | 2 första sjundedelen |                  |       |       |       |

## Categorical Variables Codings

|                              |                      | Parameter coding |       |       |       |
|------------------------------|----------------------|------------------|-------|-------|-------|
|                              |                      | (12)             | (13)  | (14)  | (15)  |
| VASTY2 (SAIR*10000)+VASTY    | 403073101            | ,000             | ,000  | ,000  | ,000  |
|                              | 403073102            | ,000             | ,000  | ,000  | ,000  |
|                              | 403073103            | ,000             | ,000  | ,000  | ,000  |
|                              | 403073202            | ,000             | ,000  | ,000  | ,000  |
|                              | 403073203            | ,000             | ,000  | ,000  | ,000  |
|                              | 403073204            | ,000             | ,000  | ,000  | ,000  |
|                              | 403073303            | ,000             | ,000  | ,000  | ,000  |
|                              | 403073651            | ,000             | ,000  | ,000  | ,000  |
|                              | 403073771            | ,000             | ,000  | ,000  | ,000  |
|                              | 403133102            | ,000             | ,000  | ,000  | ,000  |
|                              | 403133106            | ,000             | ,000  | ,000  | ,000  |
|                              | 403133107            | ,000             | ,000  | ,000  | ,000  |
|                              | 403133109            | 1,000            | ,000  | ,000  | ,000  |
|                              | 403133202            | ,000             | 1,000 | ,000  | ,000  |
|                              | 403133203            | ,000             | ,000  | 1,000 | ,000  |
|                              | 403133204            | ,000             | ,000  | ,000  | 1,000 |
|                              | 403133315            | ,000             | ,000  | ,000  | ,000  |
|                              | 403133322            | ,000             | ,000  | ,000  | ,000  |
|                              | 403133401            | ,000             | ,000  | ,000  | ,000  |
|                              | 403133402            | ,000             | ,000  | ,000  | ,000  |
|                              | 403133550            | ,000             | ,000  | ,000  | ,000  |
|                              | 403133772            | ,000             | ,000  | ,000  | ,000  |
|                              | 403135803            | ,000             | ,000  | ,000  | ,000  |
|                              | 404060001            | ,000             | ,000  | ,000  | ,000  |
|                              | 404060002            | ,000             | ,000  | ,000  | ,000  |
|                              | 404310003            | ,000             | ,000  | ,000  | ,000  |
|                              | 404310004            | ,000             | ,000  | ,000  | ,000  |
|                              | 502300005            | ,000             | ,000  | ,000  | ,000  |
|                              | 502300006            | ,000             | ,000  | ,000  | ,000  |
|                              | 502300007            | ,000             | ,000  | ,000  | ,000  |
|                              | 502300214            | ,000             | ,000  | ,000  | ,000  |
|                              | 502300411            | ,000             | ,000  | ,000  | ,000  |
|                              | 502300415            | ,000             | ,000  | ,000  | ,000  |
|                              | 502300416            | ,000             | ,000  | ,000  | ,000  |
|                              | 502300811            | ,000             | ,000  | ,000  | ,000  |
|                              | 502300913            | ,000             | ,000  | ,000  | ,000  |
| sv7 sjättedelar för standard | 1 fjärde sjundedelen |                  |       |       |       |
|                              | 2 första sjundedelen |                  |       |       |       |

## Categorical Variables Codings

|                              |                      | Parameter coding |       |       |       |
|------------------------------|----------------------|------------------|-------|-------|-------|
|                              |                      | (16)             | (17)  | (18)  | (19)  |
| VASTY2 (SAIR*10000)+VASTY    | 403073101            | ,000             | ,000  | ,000  | ,000  |
|                              | 403073102            | ,000             | ,000  | ,000  | ,000  |
|                              | 403073103            | ,000             | ,000  | ,000  | ,000  |
|                              | 403073202            | ,000             | ,000  | ,000  | ,000  |
|                              | 403073203            | ,000             | ,000  | ,000  | ,000  |
|                              | 403073204            | ,000             | ,000  | ,000  | ,000  |
|                              | 403073303            | ,000             | ,000  | ,000  | ,000  |
|                              | 403073651            | ,000             | ,000  | ,000  | ,000  |
|                              | 403073771            | ,000             | ,000  | ,000  | ,000  |
|                              | 403133102            | ,000             | ,000  | ,000  | ,000  |
|                              | 403133106            | ,000             | ,000  | ,000  | ,000  |
|                              | 403133107            | ,000             | ,000  | ,000  | ,000  |
|                              | 403133109            | ,000             | ,000  | ,000  | ,000  |
|                              | 403133202            | ,000             | ,000  | ,000  | ,000  |
|                              | 403133203            | ,000             | ,000  | ,000  | ,000  |
|                              | 403133204            | ,000             | ,000  | ,000  | ,000  |
|                              | 403133315            | 1,000            | ,000  | ,000  | ,000  |
|                              | 403133322            | ,000             | 1,000 | ,000  | ,000  |
|                              | 403133401            | ,000             | ,000  | 1,000 | ,000  |
|                              | 403133402            | ,000             | ,000  | ,000  | 1,000 |
|                              | 403133550            | ,000             | ,000  | ,000  | ,000  |
|                              | 403133772            | ,000             | ,000  | ,000  | ,000  |
|                              | 403135803            | ,000             | ,000  | ,000  | ,000  |
|                              | 404060001            | ,000             | ,000  | ,000  | ,000  |
|                              | 404060002            | ,000             | ,000  | ,000  | ,000  |
|                              | 404310003            | ,000             | ,000  | ,000  | ,000  |
|                              | 404310004            | ,000             | ,000  | ,000  | ,000  |
|                              | 502300005            | ,000             | ,000  | ,000  | ,000  |
|                              | 502300006            | ,000             | ,000  | ,000  | ,000  |
|                              | 502300007            | ,000             | ,000  | ,000  | ,000  |
|                              | 502300214            | ,000             | ,000  | ,000  | ,000  |
|                              | 502300411            | ,000             | ,000  | ,000  | ,000  |
|                              | 502300415            | ,000             | ,000  | ,000  | ,000  |
|                              | 502300416            | ,000             | ,000  | ,000  | ,000  |
|                              | 502300811            | ,000             | ,000  | ,000  | ,000  |
|                              | 502300913            | ,000             | ,000  | ,000  | ,000  |
| sv7 sjättedelar för standard | 1 fjärde sjundedelen |                  |       |       |       |
|                              | 2 första sjundedelen |                  |       |       |       |



## Categorical Variables Codings

|                              |                      | Parameter coding |       |       |       |
|------------------------------|----------------------|------------------|-------|-------|-------|
|                              |                      | (20)             | (21)  | (22)  | (23)  |
| VASTY2 (SAIR*10000)+VASTY    | 403073101            | ,000             | ,000  | ,000  | ,000  |
|                              | 403073102            | ,000             | ,000  | ,000  | ,000  |
|                              | 403073103            | ,000             | ,000  | ,000  | ,000  |
|                              | 403073202            | ,000             | ,000  | ,000  | ,000  |
|                              | 403073203            | ,000             | ,000  | ,000  | ,000  |
|                              | 403073204            | ,000             | ,000  | ,000  | ,000  |
|                              | 403073303            | ,000             | ,000  | ,000  | ,000  |
|                              | 403073651            | ,000             | ,000  | ,000  | ,000  |
|                              | 403073771            | ,000             | ,000  | ,000  | ,000  |
|                              | 403133102            | ,000             | ,000  | ,000  | ,000  |
|                              | 403133106            | ,000             | ,000  | ,000  | ,000  |
|                              | 403133107            | ,000             | ,000  | ,000  | ,000  |
|                              | 403133109            | ,000             | ,000  | ,000  | ,000  |
|                              | 403133202            | ,000             | ,000  | ,000  | ,000  |
|                              | 403133203            | ,000             | ,000  | ,000  | ,000  |
|                              | 403133204            | ,000             | ,000  | ,000  | ,000  |
|                              | 403133315            | ,000             | ,000  | ,000  | ,000  |
|                              | 403133322            | ,000             | ,000  | ,000  | ,000  |
|                              | 403133401            | ,000             | ,000  | ,000  | ,000  |
|                              | 403133402            | ,000             | ,000  | ,000  | ,000  |
|                              | 403133550            | 1,000            | ,000  | ,000  | ,000  |
|                              | 403133772            | ,000             | 1,000 | ,000  | ,000  |
|                              | 403135803            | ,000             | ,000  | 1,000 | ,000  |
|                              | 404060001            | ,000             | ,000  | ,000  | 1,000 |
|                              | 404060002            | ,000             | ,000  | ,000  | ,000  |
|                              | 404310003            | ,000             | ,000  | ,000  | ,000  |
|                              | 404310004            | ,000             | ,000  | ,000  | ,000  |
|                              | 502300005            | ,000             | ,000  | ,000  | ,000  |
|                              | 502300006            | ,000             | ,000  | ,000  | ,000  |
|                              | 502300007            | ,000             | ,000  | ,000  | ,000  |
|                              | 502300214            | ,000             | ,000  | ,000  | ,000  |
|                              | 502300411            | ,000             | ,000  | ,000  | ,000  |
|                              | 502300415            | ,000             | ,000  | ,000  | ,000  |
|                              | 502300416            | ,000             | ,000  | ,000  | ,000  |
|                              | 502300811            | ,000             | ,000  | ,000  | ,000  |
|                              | 502300913            | ,000             | ,000  | ,000  | ,000  |
| sv7 sjättedelar för standard | 1 fjärde sjundedelen |                  |       |       |       |
|                              | 2 första sjundedelen |                  |       |       |       |

## Categorical Variables Codings

|                              |                      | Parameter coding |       |       |       |
|------------------------------|----------------------|------------------|-------|-------|-------|
|                              |                      | (24)             | (25)  | (26)  | (27)  |
| VASTY2 (SAIR*10000)+VASTY    | 403073101            | ,000             | ,000  | ,000  | ,000  |
|                              | 403073102            | ,000             | ,000  | ,000  | ,000  |
|                              | 403073103            | ,000             | ,000  | ,000  | ,000  |
|                              | 403073202            | ,000             | ,000  | ,000  | ,000  |
|                              | 403073203            | ,000             | ,000  | ,000  | ,000  |
|                              | 403073204            | ,000             | ,000  | ,000  | ,000  |
|                              | 403073303            | ,000             | ,000  | ,000  | ,000  |
|                              | 403073651            | ,000             | ,000  | ,000  | ,000  |
|                              | 403073771            | ,000             | ,000  | ,000  | ,000  |
|                              | 403133102            | ,000             | ,000  | ,000  | ,000  |
|                              | 403133106            | ,000             | ,000  | ,000  | ,000  |
|                              | 403133107            | ,000             | ,000  | ,000  | ,000  |
|                              | 403133109            | ,000             | ,000  | ,000  | ,000  |
|                              | 403133202            | ,000             | ,000  | ,000  | ,000  |
|                              | 403133203            | ,000             | ,000  | ,000  | ,000  |
|                              | 403133204            | ,000             | ,000  | ,000  | ,000  |
|                              | 403133315            | ,000             | ,000  | ,000  | ,000  |
|                              | 403133322            | ,000             | ,000  | ,000  | ,000  |
|                              | 403133401            | ,000             | ,000  | ,000  | ,000  |
|                              | 403133402            | ,000             | ,000  | ,000  | ,000  |
|                              | 403133550            | ,000             | ,000  | ,000  | ,000  |
|                              | 403133772            | ,000             | ,000  | ,000  | ,000  |
|                              | 403135803            | ,000             | ,000  | ,000  | ,000  |
|                              | 404060001            | ,000             | ,000  | ,000  | ,000  |
|                              | 404060002            | 1,000            | ,000  | ,000  | ,000  |
|                              | 404310003            | ,000             | 1,000 | ,000  | ,000  |
|                              | 404310004            | ,000             | ,000  | 1,000 | ,000  |
|                              | 502300005            | ,000             | ,000  | ,000  | 1,000 |
|                              | 502300006            | ,000             | ,000  | ,000  | ,000  |
|                              | 502300007            | ,000             | ,000  | ,000  | ,000  |
|                              | 502300214            | ,000             | ,000  | ,000  | ,000  |
|                              | 502300411            | ,000             | ,000  | ,000  | ,000  |
|                              | 502300415            | ,000             | ,000  | ,000  | ,000  |
|                              | 502300416            | ,000             | ,000  | ,000  | ,000  |
|                              | 502300811            | ,000             | ,000  | ,000  | ,000  |
|                              | 502300913            | ,000             | ,000  | ,000  | ,000  |
| sv7 sjättedelar för standard | 1 fjärde sjundedelen |                  |       |       |       |
|                              | 2 första sjundedelen |                  |       |       |       |

## Categorical Variables Codings

|                              |                      | Parameter coding |       |       |       |
|------------------------------|----------------------|------------------|-------|-------|-------|
|                              |                      | (28)             | (29)  | (30)  | (31)  |
| VASTY2 (SAIR*10000)+VASTY    | 403073101            | ,000             | ,000  | ,000  | ,000  |
|                              | 403073102            | ,000             | ,000  | ,000  | ,000  |
|                              | 403073103            | ,000             | ,000  | ,000  | ,000  |
|                              | 403073202            | ,000             | ,000  | ,000  | ,000  |
|                              | 403073203            | ,000             | ,000  | ,000  | ,000  |
|                              | 403073204            | ,000             | ,000  | ,000  | ,000  |
|                              | 403073303            | ,000             | ,000  | ,000  | ,000  |
|                              | 403073651            | ,000             | ,000  | ,000  | ,000  |
|                              | 403073771            | ,000             | ,000  | ,000  | ,000  |
|                              | 403133102            | ,000             | ,000  | ,000  | ,000  |
|                              | 403133106            | ,000             | ,000  | ,000  | ,000  |
|                              | 403133107            | ,000             | ,000  | ,000  | ,000  |
|                              | 403133109            | ,000             | ,000  | ,000  | ,000  |
|                              | 403133202            | ,000             | ,000  | ,000  | ,000  |
|                              | 403133203            | ,000             | ,000  | ,000  | ,000  |
|                              | 403133204            | ,000             | ,000  | ,000  | ,000  |
|                              | 403133315            | ,000             | ,000  | ,000  | ,000  |
|                              | 403133322            | ,000             | ,000  | ,000  | ,000  |
|                              | 403133401            | ,000             | ,000  | ,000  | ,000  |
|                              | 403133402            | ,000             | ,000  | ,000  | ,000  |
|                              | 403133550            | ,000             | ,000  | ,000  | ,000  |
|                              | 403133772            | ,000             | ,000  | ,000  | ,000  |
|                              | 403135803            | ,000             | ,000  | ,000  | ,000  |
|                              | 404060001            | ,000             | ,000  | ,000  | ,000  |
|                              | 404060002            | ,000             | ,000  | ,000  | ,000  |
|                              | 404310003            | ,000             | ,000  | ,000  | ,000  |
|                              | 404310004            | ,000             | ,000  | ,000  | ,000  |
|                              | 502300005            | ,000             | ,000  | ,000  | ,000  |
|                              | 502300006            | 1,000            | ,000  | ,000  | ,000  |
|                              | 502300007            | ,000             | 1,000 | ,000  | ,000  |
|                              | 502300214            | ,000             | ,000  | 1,000 | ,000  |
|                              | 502300411            | ,000             | ,000  | ,000  | 1,000 |
|                              | 502300415            | ,000             | ,000  | ,000  | ,000  |
|                              | 502300416            | ,000             | ,000  | ,000  | ,000  |
|                              | 502300811            | ,000             | ,000  | ,000  | ,000  |
|                              | 502300913            | ,000             | ,000  | ,000  | ,000  |
| sv7 sjättedelar för standard | 1 fjärde sjundedelen |                  |       |       |       |
|                              | 2 första sjundedelen |                  |       |       |       |

## Categorical Variables Codings

|                              |                      | Parameter coding |       |       |       |
|------------------------------|----------------------|------------------|-------|-------|-------|
|                              |                      | (32)             | (33)  | (34)  | (35)  |
| VASTY2 (SAIR*10000)+VASTY    | 403073101            | ,000             | ,000  | ,000  | ,000  |
|                              | 403073102            | ,000             | ,000  | ,000  | ,000  |
|                              | 403073103            | ,000             | ,000  | ,000  | ,000  |
|                              | 403073202            | ,000             | ,000  | ,000  | ,000  |
|                              | 403073203            | ,000             | ,000  | ,000  | ,000  |
|                              | 403073204            | ,000             | ,000  | ,000  | ,000  |
|                              | 403073303            | ,000             | ,000  | ,000  | ,000  |
|                              | 403073651            | ,000             | ,000  | ,000  | ,000  |
|                              | 403073771            | ,000             | ,000  | ,000  | ,000  |
|                              | 403133102            | ,000             | ,000  | ,000  | ,000  |
|                              | 403133106            | ,000             | ,000  | ,000  | ,000  |
|                              | 403133107            | ,000             | ,000  | ,000  | ,000  |
|                              | 403133109            | ,000             | ,000  | ,000  | ,000  |
|                              | 403133202            | ,000             | ,000  | ,000  | ,000  |
|                              | 403133203            | ,000             | ,000  | ,000  | ,000  |
|                              | 403133204            | ,000             | ,000  | ,000  | ,000  |
|                              | 403133315            | ,000             | ,000  | ,000  | ,000  |
|                              | 403133322            | ,000             | ,000  | ,000  | ,000  |
|                              | 403133401            | ,000             | ,000  | ,000  | ,000  |
|                              | 403133402            | ,000             | ,000  | ,000  | ,000  |
|                              | 403133550            | ,000             | ,000  | ,000  | ,000  |
|                              | 403133772            | ,000             | ,000  | ,000  | ,000  |
|                              | 403135803            | ,000             | ,000  | ,000  | ,000  |
|                              | 404060001            | ,000             | ,000  | ,000  | ,000  |
|                              | 404060002            | ,000             | ,000  | ,000  | ,000  |
|                              | 404310003            | ,000             | ,000  | ,000  | ,000  |
|                              | 404310004            | ,000             | ,000  | ,000  | ,000  |
|                              | 502300005            | ,000             | ,000  | ,000  | ,000  |
|                              | 502300006            | ,000             | ,000  | ,000  | ,000  |
|                              | 502300007            | ,000             | ,000  | ,000  | ,000  |
|                              | 502300214            | ,000             | ,000  | ,000  | ,000  |
|                              | 502300411            | ,000             | ,000  | ,000  | ,000  |
|                              | 502300415            | 1,000            | ,000  | ,000  | ,000  |
|                              | 502300416            | ,000             | 1,000 | ,000  | ,000  |
|                              | 502300811            | ,000             | ,000  | 1,000 | ,000  |
|                              | 502300913            | ,000             | ,000  | ,000  | 1,000 |
| sv7 sjättedelar för standard | 1 fjärde sjundedelen |                  |       |       |       |
|                              | 2 första sjundedelen |                  |       |       |       |

**Categorical Variables Codings**

|                      | Frequency | Parameter coding |       |       |
|----------------------|-----------|------------------|-------|-------|
|                      |           | (1)              | (2)   | (3)   |
| 3 andra sjundedelen  | 1238      | ,000             | 1,000 | ,000  |
| 4 tredje sjundedelen | 1255      | ,000             | ,000  | 1,000 |
| 5 femte sjundedelen  | 1445      | ,000             | ,000  | ,000  |
| 6 sjätte sjundedelen | 1948      | ,000             | ,000  | ,000  |
| 7 sjunde sjundedelen | 2135      | ,000             | ,000  | ,000  |

**Categorical Variables Codings**

|                      | Frequency | Parameter coding |       |      |     |
|----------------------|-----------|------------------|-------|------|-----|
|                      |           | (4)              | (5)   | (6)  | (7) |
| 3 andra sjundedelen  | ,000      | ,000             | ,000  | ,000 |     |
| 4 tredje sjundedelen | ,000      | ,000             | ,000  | ,000 |     |
| 5 femte sjundedelen  | 1,000     | ,000             | ,000  | ,000 |     |
| 6 sjätte sjundedelen | ,000      | 1,000            | ,000  | ,000 |     |
| 7 sjunde sjundedelen | ,000      | ,000             | 1,000 | ,000 |     |

**Categorical Variables Codings**

|                      | Frequency | Parameter coding |     |      |      |
|----------------------|-----------|------------------|-----|------|------|
|                      |           | (8)              | (9) | (10) | (11) |
| 3 andra sjundedelen  |           |                  |     |      |      |
| 4 tredje sjundedelen |           |                  |     |      |      |
| 5 femte sjundedelen  |           |                  |     |      |      |
| 6 sjätte sjundedelen |           |                  |     |      |      |
| 7 sjunde sjundedelen |           |                  |     |      |      |

**Categorical Variables Codings**

|                      | Frequency | Parameter coding |      |      |      |
|----------------------|-----------|------------------|------|------|------|
|                      |           | (12)             | (13) | (14) | (15) |
| 3 andra sjundedelen  |           |                  |      |      |      |
| 4 tredje sjundedelen |           |                  |      |      |      |
| 5 femte sjundedelen  |           |                  |      |      |      |
| 6 sjätte sjundedelen |           |                  |      |      |      |
| 7 sjunde sjundedelen |           |                  |      |      |      |

**Categorical Variables Codings**

|                      | Frequency | Parameter coding |      |      |      |
|----------------------|-----------|------------------|------|------|------|
|                      |           | (16)             | (17) | (18) | (19) |
| 3 andra sjundedelen  |           |                  |      |      |      |
| 4 tredje sjundedelen |           |                  |      |      |      |
| 5 femte sjundedelen  |           |                  |      |      |      |
| 6 sjätte sjundedelen |           |                  |      |      |      |
| 7 sjunde sjundedelen |           |                  |      |      |      |

**Categorical Variables Codings**

|                      | Parameter coding |      |      |      |
|----------------------|------------------|------|------|------|
|                      | (20)             | (21) | (22) | (23) |
| 3 andra sjundedelen  |                  |      |      |      |
| 4 tredje sjundedelen |                  |      |      |      |
| 5 femte sjundedelen  |                  |      |      |      |
| 6 sjätte sjundedelen |                  |      |      |      |
| 7 sjunde sjundedelen |                  |      |      |      |

**Categorical Variables Codings**

|                      | Parameter coding |      |      |      |
|----------------------|------------------|------|------|------|
|                      | (24)             | (25) | (26) | (27) |
| 3 andra sjundedelen  |                  |      |      |      |
| 4 tredje sjundedelen |                  |      |      |      |
| 5 femte sjundedelen  |                  |      |      |      |
| 6 sjätte sjundedelen |                  |      |      |      |
| 7 sjunde sjundedelen |                  |      |      |      |

**Categorical Variables Codings**

|                      | Parameter coding |      |      |      |
|----------------------|------------------|------|------|------|
|                      | (28)             | (29) | (30) | (31) |
| 3 andra sjundedelen  |                  |      |      |      |
| 4 tredje sjundedelen |                  |      |      |      |
| 5 femte sjundedelen  |                  |      |      |      |
| 6 sjätte sjundedelen |                  |      |      |      |
| 7 sjunde sjundedelen |                  |      |      |      |

**Categorical Variables Codings**

|                      | Parameter coding |      |      |      |
|----------------------|------------------|------|------|------|
|                      | (32)             | (33) | (34) | (35) |
| 3 andra sjundedelen  |                  |      |      |      |
| 4 tredje sjundedelen |                  |      |      |      |
| 5 femte sjundedelen  |                  |      |      |      |
| 6 sjätte sjundedelen |                  |      |      |      |
| 7 sjunde sjundedelen |                  |      |      |      |

**Block 0: Beginning Block**

**Classification Table<sup>a,b</sup>**

| Observed           |                                |                           | Predicted                 |                      |
|--------------------|--------------------------------|---------------------------|---------------------------|----------------------|
|                    |                                |                           | 0 ingen eller en händelse | 1 mer än en händelse |
| Step 0             | handlt1 händelse larger than 1 | 0 ingen eller en händelse | 12229                     | 0                    |
|                    |                                | 1 mer än en händelse      | 246                       | 0                    |
| Overall Percentage |                                |                           |                           |                      |

**Classification Table<sup>a,b</sup>**

| Observed           |                                |                           | Predicted          |
|--------------------|--------------------------------|---------------------------|--------------------|
|                    |                                |                           | Percentage Correct |
| Step 0             | handlt1 händelse larger than 1 | 0 ingen eller en händelse | 100,0              |
|                    |                                | 1 mer än en händelse      | ,0                 |
| Overall Percentage |                                |                           | 98,0               |

a. Constant is included in the model.

b. The cut value is ,500

**Variables in the Equation**

|                 | B      | S.E. | Wald     | df | Sig. | Exp(B) |
|-----------------|--------|------|----------|----|------|--------|
| Step 0 Constant | -3,906 | ,064 | 3679,612 | 1  | ,000 | ,020   |

## Variables not in the Equation

|        |           |            | Score   | df | Sig. |
|--------|-----------|------------|---------|----|------|
| Step 0 | Variables | sv7        | 5,330   | 6  | ,502 |
|        |           | sv7(1)     | 4,275   | 1  | ,039 |
|        |           | sv7(2)     | ,008    | 1  | ,929 |
|        |           | sv7(3)     | ,232    | 1  | ,630 |
|        |           | sv7(4)     | ,010    | 1  | ,921 |
|        |           | sv7(5)     | 1,811   | 1  | ,178 |
|        |           | sv7(6)     | ,246    | 1  | ,620 |
|        |           | VASTY2     | 211,294 | 35 | ,000 |
|        |           | VASTY2(1)  | ,109    | 1  | ,741 |
|        |           | VASTY2(2)  | 2,111   | 1  | ,146 |
|        |           | VASTY2(3)  | 5,608   | 1  | ,018 |
|        |           | VASTY2(4)  | ,094    | 1  | ,759 |
|        |           | VASTY2(5)  | 1,981   | 1  | ,159 |
|        |           | VASTY2(6)  | 7,542   | 1  | ,006 |
|        |           | VASTY2(7)  | 3,478   | 1  | ,062 |
|        |           | VASTY2(8)  | ,006    | 1  | ,940 |
|        |           | VASTY2(9)  | ,082    | 1  | ,775 |
|        |           | VASTY2(10) | 36,459  | 1  | ,000 |
|        |           | VASTY2(11) | 27,814  | 1  | ,000 |
|        |           | VASTY2(12) | 2,573   | 1  | ,109 |
|        |           | VASTY2(13) | ,705    | 1  | ,401 |
|        |           | VASTY2(14) | ,209    | 1  | ,647 |
|        |           | VASTY2(15) | ,209    | 1  | ,647 |
|        |           | VASTY2(16) | ,071    | 1  | ,789 |
|        |           | VASTY2(17) | 7,564   | 1  | ,006 |
|        |           | VASTY2(18) | 7,500   | 1  | ,006 |
|        |           | VASTY2(19) | 5,608   | 1  | ,018 |
|        |           | VASTY2(20) | 1,471   | 1  | ,225 |
|        |           | VASTY2(21) | 2,573   | 1  | ,109 |
|        |           | VASTY2(22) | ,474    | 1  | ,491 |
|        |           | VASTY2(23) | 41,219  | 1  | ,000 |
|        |           | VASTY2(24) | 20,216  | 1  | ,000 |
|        |           | VASTY2(25) | ,290    | 1  | ,590 |
|        |           | VASTY2(26) | ,550    | 1  | ,458 |
|        |           | VASTY2(27) | 5,629   | 1  | ,018 |
|        |           | VASTY2(28) | 2,766   | 1  | ,096 |
|        |           | VASTY2(29) | 7,585   | 1  | ,006 |
|        |           | VASTY2(30) | ,089    | 1  | ,765 |
|        |           | VASTY2(31) | 8,820   | 1  | ,003 |
|        |           | VASTY2(32) | ,652    | 1  | ,419 |
|        |           | VASTY2(33) | 1,464   | 1  | ,226 |
|        |           | VASTY2(34) | 5,587   | 1  | ,018 |
|        |           | VASTY2(35) | 7,764   | 1  | ,005 |



## Variables not in the Equation

|                    | Score   | df | Sig. |
|--------------------|---------|----|------|
| Overall Statistics | 222,960 | 41 | ,000 |

## Block 1: Method = Enter

## Omnibus Tests of Model Coefficients

|             | Chi-square | df | Sig. |
|-------------|------------|----|------|
| Step 1 Step | 219,500    | 41 | ,000 |
| Block       | 219,500    | 41 | ,000 |
| Model       | 219,500    | 41 | ,000 |

## Model Summary

| Step | -2 Log likelihood     | Cox & Snell R Square | Nagelkerke R Square |
|------|-----------------------|----------------------|---------------------|
| 1    | 2199,283 <sup>a</sup> | ,017                 | ,099                |

a. Estimation terminated at iteration number 20 because maximum iterations has been reached. Final solution cannot be found.

Classification Table<sup>a</sup>

|                    |                                |                           | Predicted                 |                      |
|--------------------|--------------------------------|---------------------------|---------------------------|----------------------|
|                    |                                |                           | 0 ingen eller en händelse | 1 mer än en händelse |
| Observed           | handlt1 händelse larger than 1 | 0 ingen eller en händelse | 12229                     | 0                    |
|                    |                                | 1 mer än en händelse      | 246                       | 0                    |
| Overall Percentage |                                |                           |                           |                      |

Classification Table<sup>a</sup>

|                    |                                |                           | Predicted          |
|--------------------|--------------------------------|---------------------------|--------------------|
|                    |                                |                           | Percentage Correct |
| Observed           | handlt1 händelse larger than 1 | 0 ingen eller en händelse | 100,0              |
|                    |                                | 1 mer än en händelse      | ,0                 |
| Overall Percentage |                                |                           | 98,0               |

a. The cut value is ,500

## Variables in the Equation

|                         | B       | S.E.     | Wald    | df | Sig. | Exp(B) |
|-------------------------|---------|----------|---------|----|------|--------|
| Step 1 <sup>a</sup> sv7 |         |          | 11,121  | 6  | ,085 |        |
| sv7(1)                  | -,095   | ,265     | ,130    | 1  | ,719 | ,909   |
| sv7(2)                  | ,002    | ,281     | ,000    | 1  | ,995 | 1,002  |
| sv7(3)                  | ,059    | ,271     | ,048    | 1  | ,827 | 1,061  |
| sv7(4)                  | -,039   | ,269     | ,021    | 1  | ,886 | ,962   |
| sv7(5)                  | ,193    | ,247     | ,607    | 1  | ,436 | 1,213  |
| sv7(6)                  | ,725    | ,278     | 6,787   | 1  | ,009 | 2,065  |
| VASTY2                  |         |          | 120,926 | 35 | ,000 |        |
| VASTY2(1)               | ,364    | ,578     | ,396    | 1  | ,529 | 1,439  |
| VASTY2(2)               | ,454    | ,559     | ,660    | 1  | ,417 | 1,575  |
| VASTY2(3)               | -1,603  | 1,098    | 2,131   | 1  | ,144 | ,201   |
| VASTY2(4)               | ,468    | ,576     | ,659    | 1  | ,417 | 1,596  |
| VASTY2(5)               | -,371   | ,737     | ,253    | 1  | ,615 | ,690   |
| VASTY2(6)               | -17,485 | 2098,395 | ,000    | 1  | ,993 | ,000   |
| VASTY2(7)               | ,922    | ,538     | 2,936   | 1  | ,087 | 2,514  |
| VASTY2(8)               | ,367    | ,593     | ,385    | 1  | ,535 | 1,444  |
| VASTY2(9)               | ,251    | ,611     | ,168    | 1  | ,681 | 1,285  |
| VASTY2(10)              | 1,167   | ,519     | 5,065   | 1  | ,024 | 3,213  |
| VASTY2(11)              | 1,466   | ,504     | 8,452   | 1  | ,004 | 4,331  |
| VASTY2(12)              | -,768   | ,741     | 1,074   | 1  | ,300 | ,464   |
| VASTY2(13)              | -,435   | ,654     | ,442    | 1  | ,506 | ,647   |
| VASTY2(14)              | -,061   | ,617     | ,010    | 1  | ,921 | ,941   |
| VASTY2(15)              | -,163   | ,623     | ,069    | 1  | ,793 | ,849   |
| VASTY2(16)              | -,008   | ,743     | ,000    | 1  | ,991 | ,992   |
| VASTY2(17)              | -16,945 | 2098,533 | ,000    | 1  | ,994 | ,000   |
| VASTY2(18)              | -16,806 | 2112,381 | ,000    | 1  | ,994 | ,000   |
| VASTY2(19)              | -1,493  | 1,114    | 1,798   | 1  | ,180 | ,225   |
| VASTY2(20)              | -,619   | ,743     | ,694    | 1  | ,405 | ,538   |
| VASTY2(21)              | -,502   | ,735     | ,467    | 1  | ,494 | ,605   |
| VASTY2(22)              | ,587    | ,563     | 1,088   | 1  | ,297 | 1,799  |
| VASTY2(23)              | 1,633   | ,498     | 10,751  | 1  | ,001 | 5,120  |
| VASTY2(24)              | 1,223   | ,512     | 5,712   | 1  | ,017 | 3,398  |
| VASTY2(25)              | ,597    | ,593     | 1,013   | 1  | ,314 | 1,817  |
| VASTY2(26)              | -,060   | ,676     | ,008    | 1  | ,930 | ,942   |
| VASTY2(27)              | -1,952  | 1,104    | 3,123   | 1  | ,077 | ,142   |
| VASTY2(28)              | -1,788  | 1,117    | 2,561   | 1  | ,109 | ,167   |
| VASTY2(29)              | -17,601 | 2099,708 | ,000    | 1  | ,993 | ,000   |
| VASTY2(30)              | ,504    | ,577     | ,763    | 1  | ,383 | 1,655  |
| VASTY2(31)              | 1,211   | ,538     | 5,066   | 1  | ,024 | 3,357  |
| VASTY2(32)              | ,134    | ,660     | ,041    | 1  | ,839 | 1,143  |
| VASTY2(33)              | -,093   | ,700     | ,018    | 1  | ,894 | ,911   |
| VASTY2(34)              | -1,645  | 1,098    | 2,243   | 1  | ,134 | ,193   |

## Variables in the Equation

|                     |            | 95% C.I. for EXP(B) |        |
|---------------------|------------|---------------------|--------|
|                     |            | Lower               | Upper  |
| Step 1 <sup>a</sup> | sv7        |                     |        |
|                     | sv7(1)     | ,541                | 1,527  |
|                     | sv7(2)     | ,577                | 1,739  |
|                     | sv7(3)     | ,623                | 1,806  |
|                     | sv7(4)     | ,568                | 1,630  |
|                     | sv7(5)     | ,747                | 1,969  |
|                     | sv7(6)     | 1,197               | 3,563  |
|                     | VASTY2     |                     |        |
|                     | VASTY2(1)  | ,464                | 4,467  |
|                     | VASTY2(2)  | ,527                | 4,707  |
|                     | VASTY2(3)  | ,023                | 1,732  |
|                     | VASTY2(4)  | ,516                | 4,936  |
|                     | VASTY2(5)  | ,163                | 2,926  |
|                     | VASTY2(6)  | ,000                | .      |
|                     | VASTY2(7)  | ,876                | 7,217  |
|                     | VASTY2(8)  | ,452                | 4,613  |
|                     | VASTY2(9)  | ,388                | 4,252  |
|                     | VASTY2(10) | 1,163               | 8,882  |
|                     | VASTY2(11) | 1,612               | 11,633 |
|                     | VASTY2(12) | ,109                | 1,982  |
|                     | VASTY2(13) | ,180                | 2,332  |
|                     | VASTY2(14) | ,281                | 3,154  |
|                     | VASTY2(15) | ,251                | 2,878  |
|                     | VASTY2(16) | ,231                | 4,251  |
|                     | VASTY2(17) | ,000                | .      |
|                     | VASTY2(18) | ,000                | .      |
|                     | VASTY2(19) | ,025                | 1,992  |
|                     | VASTY2(20) | ,125                | 2,311  |
|                     | VASTY2(21) | ,143                | 2,555  |
|                     | VASTY2(22) | ,597                | 5,423  |
|                     | VASTY2(23) | 1,929               | 13,591 |
|                     | VASTY2(24) | 1,246               | 9,264  |
|                     | VASTY2(25) | ,568                | 5,808  |
|                     | VASTY2(26) | ,250                | 3,547  |
|                     | VASTY2(27) | ,016                | 1,237  |
|                     | VASTY2(28) | ,019                | 1,494  |
|                     | VASTY2(29) | ,000                | .      |
|                     | VASTY2(30) | ,534                | 5,131  |
|                     | VASTY2(31) | 1,169               | 9,639  |
|                     | VASTY2(32) | ,314                | 4,170  |
|                     | VASTY2(33) | ,231                | 3,593  |
|                     | VASTY2(34) | ,022                | 1,661  |

## Variables in the Equation

|            | B      | S.E. | Wald   | df | Sig. | Exp(B) |
|------------|--------|------|--------|----|------|--------|
| VASTY2(35) | 1,051  | ,535 | 3,864  | 1  | ,049 | 2,861  |
| Constant   | -4,309 | ,480 | 80,714 | 1  | ,000 | ,013   |

## Variables in the Equation

|            | 95% C.I. for EXP(B) |       |
|------------|---------------------|-------|
|            | Lower               | Upper |
| VASTY2(35) | 1,003               | 8,163 |
| Constant   |                     |       |

a. Variable(s) entered on step 1: sv7, VASTY2.

\*\*

LOGISTIC REGRESSION VARIABLES dod01

/METHOD=ENTER bv1 VASTY2

/CONTRAST (bv1)=Indicator(1)

/CONTRAST (VASTY2)=Indicator(1)

/PRINT=CI(95)

/CRITERIA=PIN(0.05) POUT(0.10) ITERATE(20) CUT(0.5).

## Logistic Regression

[DataSet6] C:\cWordjan\Rafaela\_VCS\alla\_tillsammans\abo\_bjo\_vasa\_v1.sav

### Case Processing Summary

| Unweighted Cases <sup>a</sup> |                      | N     | Percent |
|-------------------------------|----------------------|-------|---------|
| Selected Cases                | Included in Analysis | 12475 | 100,0   |
|                               | Missing Cases        | 0     | ,0      |
|                               | Total                | 12475 | 100,0   |
| Unselected Cases              |                      | 0     | ,0      |
| Total                         |                      | 12475 | 100,0   |

a. If weight is in effect, see classification table for the total number of cases.

### Dependent Variable Encoding

| Original Value       | Internal Value |
|----------------------|----------------|
| 0 inget dödsfall     | 0              |
| 1 minst ett dödsfall | 1              |

## Categorical Variables Codings

|                                             | Frequency | Parameter coding |       |       |
|---------------------------------------------|-----------|------------------|-------|-------|
|                                             |           | (1)              | (2)   | (3)   |
| VASTY2 (SAIR*10000)+VASTY 403073101         | 365       | ,000             | ,000  | ,000  |
| 403073102                                   | 362       | 1,000            | ,000  | ,000  |
| 403073103                                   | 365       | ,000             | 1,000 | ,000  |
| 403073202                                   | 365       | ,000             | ,000  | 1,000 |
| 403073203                                   | 365       | ,000             | ,000  | ,000  |
| 403073204                                   | 330       | ,000             | ,000  | ,000  |
| 403073303                                   | 364       | ,000             | ,000  | ,000  |
| 403073651                                   | 362       | ,000             | ,000  | ,000  |
| 403073771                                   | 365       | ,000             | ,000  | ,000  |
| 403133102                                   | 341       | ,000             | ,000  | ,000  |
| 403133106                                   | 365       | ,000             | ,000  | ,000  |
| 403133107                                   | 365       | ,000             | ,000  | ,000  |
| 403133109                                   | 365       | ,000             | ,000  | ,000  |
| 403133202                                   | 365       | ,000             | ,000  | ,000  |
| 403133203                                   | 365       | ,000             | ,000  | ,000  |
| 403133204                                   | 365       | ,000             | ,000  | ,000  |
| 403133315                                   | 177       | ,000             | ,000  | ,000  |
| 403133322                                   | 365       | ,000             | ,000  | ,000  |
| 403133401                                   | 362       | ,000             | ,000  | ,000  |
| 403133402                                   | 365       | ,000             | ,000  | ,000  |
| 403133550                                   | 298       | ,000             | ,000  | ,000  |
| 403133772                                   | 365       | ,000             | ,000  | ,000  |
| 403135803                                   | 365       | ,000             | ,000  | ,000  |
| 404060001                                   | 365       | ,000             | ,000  | ,000  |
| 404060002                                   | 366       | ,000             | ,000  | ,000  |
| 404310003                                   | 291       | ,000             | ,000  | ,000  |
| 404310004                                   | 291       | ,000             | ,000  | ,000  |
| 502300005                                   | 366       | ,000             | ,000  | ,000  |
| 502300006                                   | 225       | ,000             | ,000  | ,000  |
| 502300007                                   | 366       | ,000             | ,000  | ,000  |
| 502300214                                   | 366       | ,000             | ,000  | ,000  |
| 502300411                                   | 366       | ,000             | ,000  | ,000  |
| 502300415                                   | 360       | ,000             | ,000  | ,000  |
| 502300416                                   | 363       | ,000             | ,000  | ,000  |
| 502300811                                   | 364       | ,000             | ,000  | ,000  |
| 502300913                                   | 315       | ,000             | ,000  | ,000  |
| bv1 belastning vs paencil 1 medelbelastning | 5380      | ,000             | ,000  |       |
| 2 underbelastning                           | 3222      | 1,000            | ,000  |       |
| 3 överbelastning                            | 3873      | ,000             | 1,000 |       |

## Categorical Variables Codings

|                           |                   | Parameter coding |       |       |       |
|---------------------------|-------------------|------------------|-------|-------|-------|
|                           |                   | (4)              | (5)   | (6)   | (7)   |
| VASTY2 (SAIR*10000)+VASTY | 403073101         | ,000             | ,000  | ,000  | ,000  |
|                           | 403073102         | ,000             | ,000  | ,000  | ,000  |
|                           | 403073103         | ,000             | ,000  | ,000  | ,000  |
|                           | 403073202         | ,000             | ,000  | ,000  | ,000  |
|                           | 403073203         | 1,000            | ,000  | ,000  | ,000  |
|                           | 403073204         | ,000             | 1,000 | ,000  | ,000  |
|                           | 403073303         | ,000             | ,000  | 1,000 | ,000  |
|                           | 403073651         | ,000             | ,000  | ,000  | 1,000 |
|                           | 403073771         | ,000             | ,000  | ,000  | ,000  |
|                           | 403133102         | ,000             | ,000  | ,000  | ,000  |
|                           | 403133106         | ,000             | ,000  | ,000  | ,000  |
|                           | 403133107         | ,000             | ,000  | ,000  | ,000  |
|                           | 403133109         | ,000             | ,000  | ,000  | ,000  |
|                           | 403133202         | ,000             | ,000  | ,000  | ,000  |
|                           | 403133203         | ,000             | ,000  | ,000  | ,000  |
|                           | 403133204         | ,000             | ,000  | ,000  | ,000  |
|                           | 403133315         | ,000             | ,000  | ,000  | ,000  |
|                           | 403133322         | ,000             | ,000  | ,000  | ,000  |
|                           | 403133401         | ,000             | ,000  | ,000  | ,000  |
|                           | 403133402         | ,000             | ,000  | ,000  | ,000  |
|                           | 403133550         | ,000             | ,000  | ,000  | ,000  |
|                           | 403133772         | ,000             | ,000  | ,000  | ,000  |
|                           | 403135803         | ,000             | ,000  | ,000  | ,000  |
|                           | 404060001         | ,000             | ,000  | ,000  | ,000  |
|                           | 404060002         | ,000             | ,000  | ,000  | ,000  |
|                           | 404310003         | ,000             | ,000  | ,000  | ,000  |
|                           | 404310004         | ,000             | ,000  | ,000  | ,000  |
|                           | 502300005         | ,000             | ,000  | ,000  | ,000  |
|                           | 502300006         | ,000             | ,000  | ,000  | ,000  |
|                           | 502300007         | ,000             | ,000  | ,000  | ,000  |
|                           | 502300214         | ,000             | ,000  | ,000  | ,000  |
|                           | 502300411         | ,000             | ,000  | ,000  | ,000  |
|                           | 502300415         | ,000             | ,000  | ,000  | ,000  |
|                           | 502300416         | ,000             | ,000  | ,000  | ,000  |
|                           | 502300811         | ,000             | ,000  | ,000  | ,000  |
|                           | 502300913         | ,000             | ,000  | ,000  | ,000  |
| bv1 belastning vs paencil | 1 medelbelastning |                  |       |       |       |
|                           | 2 underbelastning |                  |       |       |       |
|                           | 3 överbelastning  |                  |       |       |       |

## Categorical Variables Codings

|                           |                   | Parameter coding |       |       |       |
|---------------------------|-------------------|------------------|-------|-------|-------|
|                           |                   | (8)              | (9)   | (10)  | (11)  |
| VASTY2 (SAIR*10000)+VASTY | 403073101         | ,000             | ,000  | ,000  | ,000  |
|                           | 403073102         | ,000             | ,000  | ,000  | ,000  |
|                           | 403073103         | ,000             | ,000  | ,000  | ,000  |
|                           | 403073202         | ,000             | ,000  | ,000  | ,000  |
|                           | 403073203         | ,000             | ,000  | ,000  | ,000  |
|                           | 403073204         | ,000             | ,000  | ,000  | ,000  |
|                           | 403073303         | ,000             | ,000  | ,000  | ,000  |
|                           | 403073651         | ,000             | ,000  | ,000  | ,000  |
|                           | 403073771         | 1,000            | ,000  | ,000  | ,000  |
|                           | 403133102         | ,000             | 1,000 | ,000  | ,000  |
|                           | 403133106         | ,000             | ,000  | 1,000 | ,000  |
|                           | 403133107         | ,000             | ,000  | ,000  | 1,000 |
|                           | 403133109         | ,000             | ,000  | ,000  | ,000  |
|                           | 403133202         | ,000             | ,000  | ,000  | ,000  |
|                           | 403133203         | ,000             | ,000  | ,000  | ,000  |
|                           | 403133204         | ,000             | ,000  | ,000  | ,000  |
|                           | 403133315         | ,000             | ,000  | ,000  | ,000  |
|                           | 403133322         | ,000             | ,000  | ,000  | ,000  |
|                           | 403133401         | ,000             | ,000  | ,000  | ,000  |
|                           | 403133402         | ,000             | ,000  | ,000  | ,000  |
|                           | 403133550         | ,000             | ,000  | ,000  | ,000  |
|                           | 403133772         | ,000             | ,000  | ,000  | ,000  |
|                           | 403135803         | ,000             | ,000  | ,000  | ,000  |
|                           | 404060001         | ,000             | ,000  | ,000  | ,000  |
|                           | 404060002         | ,000             | ,000  | ,000  | ,000  |
|                           | 404310003         | ,000             | ,000  | ,000  | ,000  |
|                           | 404310004         | ,000             | ,000  | ,000  | ,000  |
|                           | 502300005         | ,000             | ,000  | ,000  | ,000  |
|                           | 502300006         | ,000             | ,000  | ,000  | ,000  |
|                           | 502300007         | ,000             | ,000  | ,000  | ,000  |
|                           | 502300214         | ,000             | ,000  | ,000  | ,000  |
|                           | 502300411         | ,000             | ,000  | ,000  | ,000  |
|                           | 502300415         | ,000             | ,000  | ,000  | ,000  |
|                           | 502300416         | ,000             | ,000  | ,000  | ,000  |
|                           | 502300811         | ,000             | ,000  | ,000  | ,000  |
|                           | 502300913         | ,000             | ,000  | ,000  | ,000  |
| bv1 belastning vs paencil | 1 medelbelastning |                  |       |       |       |
|                           | 2 underbelastning |                  |       |       |       |
|                           | 3 överbelastning  |                  |       |       |       |

## Categorical Variables Codings

|                           |                   | Parameter coding |       |       |       |
|---------------------------|-------------------|------------------|-------|-------|-------|
|                           |                   | (12)             | (13)  | (14)  | (15)  |
| VASTY2 (SAIR*10000)+VASTY | 403073101         | ,000             | ,000  | ,000  | ,000  |
|                           | 403073102         | ,000             | ,000  | ,000  | ,000  |
|                           | 403073103         | ,000             | ,000  | ,000  | ,000  |
|                           | 403073202         | ,000             | ,000  | ,000  | ,000  |
|                           | 403073203         | ,000             | ,000  | ,000  | ,000  |
|                           | 403073204         | ,000             | ,000  | ,000  | ,000  |
|                           | 403073303         | ,000             | ,000  | ,000  | ,000  |
|                           | 403073651         | ,000             | ,000  | ,000  | ,000  |
|                           | 403073771         | ,000             | ,000  | ,000  | ,000  |
|                           | 403133102         | ,000             | ,000  | ,000  | ,000  |
|                           | 403133106         | ,000             | ,000  | ,000  | ,000  |
|                           | 403133107         | ,000             | ,000  | ,000  | ,000  |
|                           | 403133109         | 1,000            | ,000  | ,000  | ,000  |
|                           | 403133202         | ,000             | 1,000 | ,000  | ,000  |
|                           | 403133203         | ,000             | ,000  | 1,000 | ,000  |
|                           | 403133204         | ,000             | ,000  | ,000  | 1,000 |
|                           | 403133315         | ,000             | ,000  | ,000  | ,000  |
|                           | 403133322         | ,000             | ,000  | ,000  | ,000  |
|                           | 403133401         | ,000             | ,000  | ,000  | ,000  |
|                           | 403133402         | ,000             | ,000  | ,000  | ,000  |
|                           | 403133550         | ,000             | ,000  | ,000  | ,000  |
|                           | 403133772         | ,000             | ,000  | ,000  | ,000  |
|                           | 403135803         | ,000             | ,000  | ,000  | ,000  |
|                           | 404060001         | ,000             | ,000  | ,000  | ,000  |
|                           | 404060002         | ,000             | ,000  | ,000  | ,000  |
|                           | 404310003         | ,000             | ,000  | ,000  | ,000  |
|                           | 404310004         | ,000             | ,000  | ,000  | ,000  |
|                           | 502300005         | ,000             | ,000  | ,000  | ,000  |
|                           | 502300006         | ,000             | ,000  | ,000  | ,000  |
|                           | 502300007         | ,000             | ,000  | ,000  | ,000  |
|                           | 502300214         | ,000             | ,000  | ,000  | ,000  |
|                           | 502300411         | ,000             | ,000  | ,000  | ,000  |
|                           | 502300415         | ,000             | ,000  | ,000  | ,000  |
|                           | 502300416         | ,000             | ,000  | ,000  | ,000  |
|                           | 502300811         | ,000             | ,000  | ,000  | ,000  |
|                           | 502300913         | ,000             | ,000  | ,000  | ,000  |
| bv1 belastning vs paencil | 1 medelbelastning |                  |       |       |       |
|                           | 2 underbelastning |                  |       |       |       |
|                           | 3 överbelastning  |                  |       |       |       |



## Categorical Variables Codings

|                           |                   | Parameter coding |       |       |       |
|---------------------------|-------------------|------------------|-------|-------|-------|
|                           |                   | (16)             | (17)  | (18)  | (19)  |
| VASTY2 (SAIR*10000)+VASTY | 403073101         | ,000             | ,000  | ,000  | ,000  |
|                           | 403073102         | ,000             | ,000  | ,000  | ,000  |
|                           | 403073103         | ,000             | ,000  | ,000  | ,000  |
|                           | 403073202         | ,000             | ,000  | ,000  | ,000  |
|                           | 403073203         | ,000             | ,000  | ,000  | ,000  |
|                           | 403073204         | ,000             | ,000  | ,000  | ,000  |
|                           | 403073303         | ,000             | ,000  | ,000  | ,000  |
|                           | 403073651         | ,000             | ,000  | ,000  | ,000  |
|                           | 403073771         | ,000             | ,000  | ,000  | ,000  |
|                           | 403133102         | ,000             | ,000  | ,000  | ,000  |
|                           | 403133106         | ,000             | ,000  | ,000  | ,000  |
|                           | 403133107         | ,000             | ,000  | ,000  | ,000  |
|                           | 403133109         | ,000             | ,000  | ,000  | ,000  |
|                           | 403133202         | ,000             | ,000  | ,000  | ,000  |
|                           | 403133203         | ,000             | ,000  | ,000  | ,000  |
|                           | 403133204         | ,000             | ,000  | ,000  | ,000  |
|                           | 403133315         | 1,000            | ,000  | ,000  | ,000  |
|                           | 403133322         | ,000             | 1,000 | ,000  | ,000  |
|                           | 403133401         | ,000             | ,000  | 1,000 | ,000  |
|                           | 403133402         | ,000             | ,000  | ,000  | 1,000 |
|                           | 403133550         | ,000             | ,000  | ,000  | ,000  |
|                           | 403133772         | ,000             | ,000  | ,000  | ,000  |
|                           | 403135803         | ,000             | ,000  | ,000  | ,000  |
|                           | 404060001         | ,000             | ,000  | ,000  | ,000  |
|                           | 404060002         | ,000             | ,000  | ,000  | ,000  |
|                           | 404310003         | ,000             | ,000  | ,000  | ,000  |
|                           | 404310004         | ,000             | ,000  | ,000  | ,000  |
|                           | 502300005         | ,000             | ,000  | ,000  | ,000  |
|                           | 502300006         | ,000             | ,000  | ,000  | ,000  |
|                           | 502300007         | ,000             | ,000  | ,000  | ,000  |
|                           | 502300214         | ,000             | ,000  | ,000  | ,000  |
|                           | 502300411         | ,000             | ,000  | ,000  | ,000  |
|                           | 502300415         | ,000             | ,000  | ,000  | ,000  |
|                           | 502300416         | ,000             | ,000  | ,000  | ,000  |
|                           | 502300811         | ,000             | ,000  | ,000  | ,000  |
|                           | 502300913         | ,000             | ,000  | ,000  | ,000  |
| bv1 belastning vs paencil | 1 medelbelastning |                  |       |       |       |
|                           | 2 underbelastning |                  |       |       |       |
|                           | 3 överbelastning  |                  |       |       |       |

## Categorical Variables Codings

|                           |                   | Parameter coding |       |       |       |
|---------------------------|-------------------|------------------|-------|-------|-------|
|                           |                   | (20)             | (21)  | (22)  | (23)  |
| VASTY2 (SAIR*10000)+VASTY | 403073101         | ,000             | ,000  | ,000  | ,000  |
|                           | 403073102         | ,000             | ,000  | ,000  | ,000  |
|                           | 403073103         | ,000             | ,000  | ,000  | ,000  |
|                           | 403073202         | ,000             | ,000  | ,000  | ,000  |
|                           | 403073203         | ,000             | ,000  | ,000  | ,000  |
|                           | 403073204         | ,000             | ,000  | ,000  | ,000  |
|                           | 403073303         | ,000             | ,000  | ,000  | ,000  |
|                           | 403073651         | ,000             | ,000  | ,000  | ,000  |
|                           | 403073771         | ,000             | ,000  | ,000  | ,000  |
|                           | 403133102         | ,000             | ,000  | ,000  | ,000  |
|                           | 403133106         | ,000             | ,000  | ,000  | ,000  |
|                           | 403133107         | ,000             | ,000  | ,000  | ,000  |
|                           | 403133109         | ,000             | ,000  | ,000  | ,000  |
|                           | 403133202         | ,000             | ,000  | ,000  | ,000  |
|                           | 403133203         | ,000             | ,000  | ,000  | ,000  |
|                           | 403133204         | ,000             | ,000  | ,000  | ,000  |
|                           | 403133315         | ,000             | ,000  | ,000  | ,000  |
|                           | 403133322         | ,000             | ,000  | ,000  | ,000  |
|                           | 403133401         | ,000             | ,000  | ,000  | ,000  |
|                           | 403133402         | ,000             | ,000  | ,000  | ,000  |
|                           | 403133550         | 1,000            | ,000  | ,000  | ,000  |
|                           | 403133772         | ,000             | 1,000 | ,000  | ,000  |
|                           | 403135803         | ,000             | ,000  | 1,000 | ,000  |
|                           | 404060001         | ,000             | ,000  | ,000  | 1,000 |
|                           | 404060002         | ,000             | ,000  | ,000  | ,000  |
|                           | 404310003         | ,000             | ,000  | ,000  | ,000  |
|                           | 404310004         | ,000             | ,000  | ,000  | ,000  |
|                           | 502300005         | ,000             | ,000  | ,000  | ,000  |
|                           | 502300006         | ,000             | ,000  | ,000  | ,000  |
|                           | 502300007         | ,000             | ,000  | ,000  | ,000  |
|                           | 502300214         | ,000             | ,000  | ,000  | ,000  |
|                           | 502300411         | ,000             | ,000  | ,000  | ,000  |
|                           | 502300415         | ,000             | ,000  | ,000  | ,000  |
|                           | 502300416         | ,000             | ,000  | ,000  | ,000  |
|                           | 502300811         | ,000             | ,000  | ,000  | ,000  |
|                           | 502300913         | ,000             | ,000  | ,000  | ,000  |
| bv1 belastning vs paencil | 1 medelbelastning |                  |       |       |       |
|                           | 2 underbelastning |                  |       |       |       |
|                           | 3 överbelastning  |                  |       |       |       |

## Categorical Variables Codings

|                           |                   | Parameter coding |       |       |       |
|---------------------------|-------------------|------------------|-------|-------|-------|
|                           |                   | (24)             | (25)  | (26)  | (27)  |
| VASTY2 (SAIR*10000)+VASTY | 403073101         | ,000             | ,000  | ,000  | ,000  |
|                           | 403073102         | ,000             | ,000  | ,000  | ,000  |
|                           | 403073103         | ,000             | ,000  | ,000  | ,000  |
|                           | 403073202         | ,000             | ,000  | ,000  | ,000  |
|                           | 403073203         | ,000             | ,000  | ,000  | ,000  |
|                           | 403073204         | ,000             | ,000  | ,000  | ,000  |
|                           | 403073303         | ,000             | ,000  | ,000  | ,000  |
|                           | 403073651         | ,000             | ,000  | ,000  | ,000  |
|                           | 403073771         | ,000             | ,000  | ,000  | ,000  |
|                           | 403133102         | ,000             | ,000  | ,000  | ,000  |
|                           | 403133106         | ,000             | ,000  | ,000  | ,000  |
|                           | 403133107         | ,000             | ,000  | ,000  | ,000  |
|                           | 403133109         | ,000             | ,000  | ,000  | ,000  |
|                           | 403133202         | ,000             | ,000  | ,000  | ,000  |
|                           | 403133203         | ,000             | ,000  | ,000  | ,000  |
|                           | 403133204         | ,000             | ,000  | ,000  | ,000  |
|                           | 403133315         | ,000             | ,000  | ,000  | ,000  |
|                           | 403133322         | ,000             | ,000  | ,000  | ,000  |
|                           | 403133401         | ,000             | ,000  | ,000  | ,000  |
|                           | 403133402         | ,000             | ,000  | ,000  | ,000  |
|                           | 403133550         | ,000             | ,000  | ,000  | ,000  |
|                           | 403133772         | ,000             | ,000  | ,000  | ,000  |
|                           | 403135803         | ,000             | ,000  | ,000  | ,000  |
|                           | 404060001         | ,000             | ,000  | ,000  | ,000  |
|                           | 404060002         | 1,000            | ,000  | ,000  | ,000  |
|                           | 404310003         | ,000             | 1,000 | ,000  | ,000  |
|                           | 404310004         | ,000             | ,000  | 1,000 | ,000  |
|                           | 502300005         | ,000             | ,000  | ,000  | 1,000 |
|                           | 502300006         | ,000             | ,000  | ,000  | ,000  |
|                           | 502300007         | ,000             | ,000  | ,000  | ,000  |
|                           | 502300214         | ,000             | ,000  | ,000  | ,000  |
|                           | 502300411         | ,000             | ,000  | ,000  | ,000  |
|                           | 502300415         | ,000             | ,000  | ,000  | ,000  |
|                           | 502300416         | ,000             | ,000  | ,000  | ,000  |
|                           | 502300811         | ,000             | ,000  | ,000  | ,000  |
|                           | 502300913         | ,000             | ,000  | ,000  | ,000  |
| bv1 belastning vs paencil | 1 medelbelastning |                  |       |       |       |
|                           | 2 underbelastning |                  |       |       |       |
|                           | 3 överbelastning  |                  |       |       |       |

## Categorical Variables Codings

|                           |                   | Parameter coding |       |       |       |
|---------------------------|-------------------|------------------|-------|-------|-------|
|                           |                   | (28)             | (29)  | (30)  | (31)  |
| VASTY2 (SAIR*10000)+VASTY | 403073101         | ,000             | ,000  | ,000  | ,000  |
|                           | 403073102         | ,000             | ,000  | ,000  | ,000  |
|                           | 403073103         | ,000             | ,000  | ,000  | ,000  |
|                           | 403073202         | ,000             | ,000  | ,000  | ,000  |
|                           | 403073203         | ,000             | ,000  | ,000  | ,000  |
|                           | 403073204         | ,000             | ,000  | ,000  | ,000  |
|                           | 403073303         | ,000             | ,000  | ,000  | ,000  |
|                           | 403073651         | ,000             | ,000  | ,000  | ,000  |
|                           | 403073771         | ,000             | ,000  | ,000  | ,000  |
|                           | 403133102         | ,000             | ,000  | ,000  | ,000  |
|                           | 403133106         | ,000             | ,000  | ,000  | ,000  |
|                           | 403133107         | ,000             | ,000  | ,000  | ,000  |
|                           | 403133109         | ,000             | ,000  | ,000  | ,000  |
|                           | 403133202         | ,000             | ,000  | ,000  | ,000  |
|                           | 403133203         | ,000             | ,000  | ,000  | ,000  |
|                           | 403133204         | ,000             | ,000  | ,000  | ,000  |
|                           | 403133315         | ,000             | ,000  | ,000  | ,000  |
|                           | 403133322         | ,000             | ,000  | ,000  | ,000  |
|                           | 403133401         | ,000             | ,000  | ,000  | ,000  |
|                           | 403133402         | ,000             | ,000  | ,000  | ,000  |
|                           | 403133550         | ,000             | ,000  | ,000  | ,000  |
|                           | 403133772         | ,000             | ,000  | ,000  | ,000  |
|                           | 403135803         | ,000             | ,000  | ,000  | ,000  |
|                           | 404060001         | ,000             | ,000  | ,000  | ,000  |
|                           | 404060002         | ,000             | ,000  | ,000  | ,000  |
|                           | 404310003         | ,000             | ,000  | ,000  | ,000  |
|                           | 404310004         | ,000             | ,000  | ,000  | ,000  |
|                           | 502300005         | ,000             | ,000  | ,000  | ,000  |
|                           | 502300006         | 1,000            | ,000  | ,000  | ,000  |
|                           | 502300007         | ,000             | 1,000 | ,000  | ,000  |
|                           | 502300214         | ,000             | ,000  | 1,000 | ,000  |
|                           | 502300411         | ,000             | ,000  | ,000  | 1,000 |
|                           | 502300415         | ,000             | ,000  | ,000  | ,000  |
|                           | 502300416         | ,000             | ,000  | ,000  | ,000  |
|                           | 502300811         | ,000             | ,000  | ,000  | ,000  |
|                           | 502300913         | ,000             | ,000  | ,000  | ,000  |
| bv1 belastning vs paencil | 1 medelbelastning |                  |       |       |       |
|                           | 2 underbelastning |                  |       |       |       |
|                           | 3 överbelastning  |                  |       |       |       |

## Categorical Variables Codings

|                           |                   | Parameter coding |       |       |       |
|---------------------------|-------------------|------------------|-------|-------|-------|
|                           |                   | (32)             | (33)  | (34)  | (35)  |
| VASTY2 (SAIR*10000)+VASTY | 403073101         | ,000             | ,000  | ,000  | ,000  |
|                           | 403073102         | ,000             | ,000  | ,000  | ,000  |
|                           | 403073103         | ,000             | ,000  | ,000  | ,000  |
|                           | 403073202         | ,000             | ,000  | ,000  | ,000  |
|                           | 403073203         | ,000             | ,000  | ,000  | ,000  |
|                           | 403073204         | ,000             | ,000  | ,000  | ,000  |
|                           | 403073303         | ,000             | ,000  | ,000  | ,000  |
|                           | 403073651         | ,000             | ,000  | ,000  | ,000  |
|                           | 403073771         | ,000             | ,000  | ,000  | ,000  |
|                           | 403133102         | ,000             | ,000  | ,000  | ,000  |
|                           | 403133106         | ,000             | ,000  | ,000  | ,000  |
|                           | 403133107         | ,000             | ,000  | ,000  | ,000  |
|                           | 403133109         | ,000             | ,000  | ,000  | ,000  |
|                           | 403133202         | ,000             | ,000  | ,000  | ,000  |
|                           | 403133203         | ,000             | ,000  | ,000  | ,000  |
|                           | 403133204         | ,000             | ,000  | ,000  | ,000  |
|                           | 403133315         | ,000             | ,000  | ,000  | ,000  |
|                           | 403133322         | ,000             | ,000  | ,000  | ,000  |
|                           | 403133401         | ,000             | ,000  | ,000  | ,000  |
|                           | 403133402         | ,000             | ,000  | ,000  | ,000  |
|                           | 403133550         | ,000             | ,000  | ,000  | ,000  |
|                           | 403133772         | ,000             | ,000  | ,000  | ,000  |
|                           | 403135803         | ,000             | ,000  | ,000  | ,000  |
|                           | 404060001         | ,000             | ,000  | ,000  | ,000  |
|                           | 404060002         | ,000             | ,000  | ,000  | ,000  |
|                           | 404310003         | ,000             | ,000  | ,000  | ,000  |
|                           | 404310004         | ,000             | ,000  | ,000  | ,000  |
|                           | 502300005         | ,000             | ,000  | ,000  | ,000  |
|                           | 502300006         | ,000             | ,000  | ,000  | ,000  |
|                           | 502300007         | ,000             | ,000  | ,000  | ,000  |
|                           | 502300214         | ,000             | ,000  | ,000  | ,000  |
|                           | 502300411         | ,000             | ,000  | ,000  | ,000  |
|                           | 502300415         | 1,000            | ,000  | ,000  | ,000  |
|                           | 502300416         | ,000             | 1,000 | ,000  | ,000  |
|                           | 502300811         | ,000             | ,000  | 1,000 | ,000  |
|                           | 502300913         | ,000             | ,000  | ,000  | 1,000 |
| bv1 belastning vs paencil | 1 medelbelastning |                  |       |       |       |
|                           | 2 underbelastning |                  |       |       |       |
|                           | 3 överbelastning  |                  |       |       |       |

**Block 0: Beginning Block**

Classification Table<sup>a,b</sup>

| Observed           |                             |                      | Predicted                   |                      |
|--------------------|-----------------------------|----------------------|-----------------------------|----------------------|
|                    |                             |                      | dod01 dödsfall ja eller nej |                      |
|                    |                             |                      | 0 inget dödsfall            | 1 minst ett dödsfall |
| Step 0             | dod01 dödsfall ja eller nej | 0 inget dödsfall     | 11839                       | 0                    |
|                    |                             | 1 minst ett dödsfall | 636                         | 0                    |
| Overall Percentage |                             |                      |                             |                      |

Classification Table<sup>a,b</sup>

| Observed           |                             |                      | Predicted          |
|--------------------|-----------------------------|----------------------|--------------------|
|                    |                             |                      | Percentage Correct |
| Step 0             | dod01 dödsfall ja eller nej | 0 inget dödsfall     | 100,0              |
|                    |                             | 1 minst ett dödsfall | ,0                 |
| Overall Percentage |                             |                      | 94,9               |

a. Constant is included in the model.

b. The cut value is ,500

Variables in the Equation

|                 | B      | S.E. | Wald     | df | Sig. | Exp(B) |
|-----------------|--------|------|----------|----|------|--------|
| Step 0 Constant | -2,924 | ,041 | 5160,279 | 1  | ,000 | ,054   |

## Variables not in the Equation

|        |                    | Score   | df | Sig. |
|--------|--------------------|---------|----|------|
| Step 0 | Variables          |         |    |      |
|        | bv1                | 63,175  | 2  | ,000 |
|        | bv1(1)             | 45,163  | 1  | ,000 |
|        | bv1(2)             | 43,009  | 1  | ,000 |
|        | VASTY2             | 635,545 | 35 | ,000 |
|        | VASTY2(1)          | 2,519   | 1  | ,113 |
|        | VASTY2(2)          | 6,299   | 1  | ,012 |
|        | VASTY2(3)          | 8,957   | 1  | ,003 |
|        | VASTY2(4)          | ,151    | 1  | ,698 |
|        | VASTY2(5)          | 7,537   | 1  | ,006 |
|        | VASTY2(6)          | 20,142  | 1  | ,000 |
|        | VASTY2(7)          | 127,387 | 1  | ,000 |
|        | VASTY2(8)          | 8,957   | 1  | ,003 |
|        | VASTY2(9)          | ,163    | 1  | ,687 |
|        | VASTY2(10)         | 7,570   | 1  | ,006 |
|        | VASTY2(11)         | ,113    | 1  | ,737 |
|        | VASTY2(12)         | 47,021  | 1  | ,000 |
|        | VASTY2(13)         | 90,515  | 1  | ,000 |
|        | VASTY2(14)         | 7,570   | 1  | ,006 |
|        | VASTY2(15)         | ,151    | 1  | ,698 |
|        | VASTY2(16)         | 4,298   | 1  | ,038 |
|        | VASTY2(17)         | 20,199  | 1  | ,000 |
|        | VASTY2(18)         | 17,916  | 1  | ,000 |
|        | VASTY2(19)         | 18,086  | 1  | ,000 |
|        | VASTY2(20)         | 10,563  | 1  | ,001 |
|        | VASTY2(21)         | 1,696   | 1  | ,193 |
|        | VASTY2(22)         | 26,693  | 1  | ,000 |
|        | VASTY2(23)         | 1,125   | 1  | ,289 |
|        | VASTY2(24)         | 72,662  | 1  | ,000 |
|        | VASTY2(25)         | 2,477   | 1  | ,116 |
|        | VASTY2(26)         | 16,006  | 1  | ,000 |
|        | VASTY2(27)         | 20,256  | 1  | ,000 |
|        | VASTY2(28)         | 12,309  | 1  | ,000 |
|        | VASTY2(29)         | 20,256  | 1  | ,000 |
|        | VASTY2(30)         | 1,263   | 1  | ,261 |
|        | VASTY2(31)         | 20,256  | 1  | ,000 |
|        | VASTY2(32)         | 15,810  | 1  | ,000 |
|        | VASTY2(33)         | 17,973  | 1  | ,000 |
|        | VASTY2(34)         | ,693    | 1  | ,405 |
|        | VASTY2(35)         | 17,360  | 1  | ,000 |
|        | Overall Statistics | 655,439 | 37 | ,000 |

**Block 1: Method = Enter**

## Omnibus Tests of Model Coefficients

|        |       | Chi-square | df | Sig. |
|--------|-------|------------|----|------|
| Step 1 | Step  | 724,914    | 37 | ,000 |
|        | Block | 724,914    | 37 | ,000 |
|        | Model | 724,914    | 37 | ,000 |

## Model Summary

| Step | -2 Log likelihood     | Cox & Snell R Square | Nagelkerke R Square |
|------|-----------------------|----------------------|---------------------|
| 1    | 4299,928 <sup>a</sup> | ,056                 | ,170                |

a. Estimation terminated at iteration number 20 because maximum iterations has been reached. Final solution cannot be found.

Classification Table<sup>a</sup>

| Observed           |                             | Predicted                   |                      |   |
|--------------------|-----------------------------|-----------------------------|----------------------|---|
|                    |                             | dod01 dödsfall ja eller nej |                      |   |
|                    |                             | 0 inget dödsfall            | 1 minst ett dödsfall |   |
| Step 1             | dod01 dödsfall ja eller nej | 0 inget dödsfall            | 11839                | 0 |
|                    |                             | 1 minst ett dödsfall        | 636                  | 0 |
| Overall Percentage |                             |                             |                      |   |

Classification Table<sup>a</sup>

| Observed           |                             | Predicted          |
|--------------------|-----------------------------|--------------------|
|                    |                             | Percentage Correct |
| Step 1             | dod01 dödsfall ja eller nej | 100,0              |
|                    |                             | ,0                 |
| Overall Percentage |                             | 94,9               |

a. The cut value is ,500



## Variables in the Equation

|                         | B       | S.E.     | Wald    | df | Sig. | Exp(B) |
|-------------------------|---------|----------|---------|----|------|--------|
| Step 1 <sup>a</sup> bv1 |         |          | 22,134  | 2  | ,000 |        |
| bv1(1)                  | -,257   | ,129     | 3,959   | 1  | ,047 | ,774   |
| bv1(2)                  | ,342    | ,097     | 12,446  | 1  | ,000 | 1,407  |
| VASTY2                  |         |          | 211,297 | 35 | ,000 |        |
| VASTY2(1)               | ,597    | ,343     | 3,036   | 1  | ,081 | 1,817  |
| VASTY2(2)               | ,710    | ,335     | 4,494   | 1  | ,034 | 2,034  |
| VASTY2(3)               | ,618    | ,335     | 3,404   | 1  | ,065 | 1,855  |
| VASTY2(4)               | ,020    | ,371     | ,003    | 1  | ,957 | 1,020  |
| VASTY2(5)               | -,856   | ,495     | 2,997   | 1  | ,083 | ,425   |
| VASTY2(6)               | -18,130 | 2100,109 | ,000    | 1  | ,993 | ,000   |
| VASTY2(7)               | 1,454   | ,310     | 21,969  | 1  | ,000 | 4,282  |
| VASTY2(8)               | ,736    | ,332     | 4,911   | 1  | ,027 | 2,087  |
| VASTY2(9)               | ,262    | ,362     | ,525    | 1  | ,469 | 1,300  |
| VASTY2(10)              | ,716    | ,334     | 4,606   | 1  | ,032 | 2,046  |
| VASTY2(11)              | ,318    | ,357     | ,791    | 1  | ,374 | 1,374  |
| VASTY2(12)              | 1,216   | ,315     | 14,887  | 1  | ,000 | 3,373  |
| VASTY2(13)              | 1,356   | ,311     | 19,014  | 1  | ,000 | 3,880  |
| VASTY2(14)              | ,687    | ,334     | 4,234   | 1  | ,040 | 1,989  |
| VASTY2(15)              | ,122    | ,369     | ,109    | 1  | ,742 | 1,130  |
| VASTY2(16)              | -,905   | ,644     | 1,974   | 1  | ,160 | ,405   |
| VASTY2(17)              | -17,967 | 2097,899 | ,000    | 1  | ,993 | ,000   |
| VASTY2(18)              | -2,701  | 1,038    | 6,771   | 1  | ,009 | ,067   |
| VASTY2(19)              | -2,459  | 1,041    | 5,580   | 1  | ,018 | ,085   |
| VASTY2(20)              | -1,506  | ,642     | 5,495   | 1  | ,019 | ,222   |
| VASTY2(21)              | ,502    | ,345     | 2,112   | 1  | ,146 | 1,652  |
| VASTY2(22)              | 1,238   | ,322     | 14,823  | 1  | ,000 | 3,450  |
| VASTY2(23)              | ,542    | ,348     | 2,429   | 1  | ,119 | 1,720  |
| VASTY2(24)              | 1,296   | ,312     | 17,212  | 1  | ,000 | 3,654  |
| VASTY2(25)              | -,214   | ,435     | ,242    | 1  | ,623 | ,807   |
| VASTY2(26)              | -18,081 | 2348,740 | ,000    | 1  | ,994 | ,000   |
| VASTY2(27)              | -18,116 | 2094,245 | ,000    | 1  | ,993 | ,000   |
| VASTY2(28)              | -18,130 | 2674,028 | ,000    | 1  | ,995 | ,000   |
| VASTY2(29)              | -18,057 | 2095,696 | ,000    | 1  | ,993 | ,000   |
| VASTY2(30)              | -,076   | ,386     | ,038    | 1  | ,845 | ,927   |
| VASTY2(31)              | -18,034 | 2092,698 | ,000    | 1  | ,993 | ,000   |
| VASTY2(32)              | -1,953  | ,760     | 6,595   | 1  | ,010 | ,142   |
| VASTY2(33)              | -2,673  | 1,038    | 6,628   | 1  | ,010 | ,069   |
| VASTY2(34)              | ,433    | ,351     | 1,526   | 1  | ,217 | 1,542  |
| VASTY2(35)              | -18,165 | 2257,371 | ,000    | 1  | ,994 | ,000   |
| Constant                | -3,204  | ,275     | 135,335 | 1  | ,000 | ,041   |

## Variables in the Equation

|                     |            | 95% C.I. for EXP(B) |       |
|---------------------|------------|---------------------|-------|
|                     |            | Lower               | Upper |
| Step 1 <sup>a</sup> | bv1        |                     |       |
|                     | bv1(1)     | ,601                | ,996  |
|                     | bv1(2)     | 1,164               | 1,701 |
|                     | VASTY2     |                     |       |
|                     | VASTY2(1)  | ,928                | 3,559 |
|                     | VASTY2(2)  | 1,055               | 3,920 |
|                     | VASTY2(3)  | ,962                | 3,574 |
|                     | VASTY2(4)  | ,493                | 2,113 |
|                     | VASTY2(5)  | ,161                | 1,120 |
|                     | VASTY2(6)  | ,000                | .     |
|                     | VASTY2(7)  | 2,331               | 7,867 |
|                     | VASTY2(8)  | 1,089               | 4,002 |
|                     | VASTY2(9)  | ,639                | 2,643 |
|                     | VASTY2(10) | 1,064               | 3,933 |
|                     | VASTY2(11) | ,682                | 2,768 |
|                     | VASTY2(12) | 1,819               | 6,256 |
|                     | VASTY2(13) | 2,110               | 7,138 |
|                     | VASTY2(14) | 1,033               | 3,828 |
|                     | VASTY2(15) | ,547                | 2,330 |
|                     | VASTY2(16) | ,115                | 1,429 |
|                     | VASTY2(17) | ,000                | .     |
|                     | VASTY2(18) | ,009                | ,513  |
|                     | VASTY2(19) | ,011                | ,658  |
|                     | VASTY2(20) | ,063                | ,781  |
|                     | VASTY2(21) | ,839                | 3,251 |
|                     | VASTY2(22) | 1,837               | 6,481 |
|                     | VASTY2(23) | ,870                | 3,400 |
|                     | VASTY2(24) | 1,981               | 6,739 |
|                     | VASTY2(25) | ,344                | 1,894 |
|                     | VASTY2(26) | ,000                | .     |
|                     | VASTY2(27) | ,000                | .     |
|                     | VASTY2(28) | ,000                | .     |
|                     | VASTY2(29) | ,000                | .     |
|                     | VASTY2(30) | ,435                | 1,976 |
|                     | VASTY2(31) | ,000                | .     |
|                     | VASTY2(32) | ,032                | ,630  |
|                     | VASTY2(33) | ,009                | ,528  |
|                     | VASTY2(34) | ,776                | 3,067 |
|                     | VASTY2(35) | ,000                | .     |
|                     | Constant   |                     |       |

a. Variable(s) entered on step 1: bv1, VASTY2.

```

1
2
3 LOGISTIC REGRESSION VARIABLES dod01
4   /METHOD=ENTER bv2 VASTY2
5   /CONTRAST (bv2)=Indicator(1)
6   /CONTRAST (VASTY2)=Indicator(1)
7   /PRINT=CI(95)
8   /CRITERIA=PIN(0.05) POUT(0.10) ITERATE(20) CUT(0.5).
9
10
11

```

## Logistic Regression

[DataSet6] C:\cWordjan\Rafaela\_VCS\alla\_tillsammans\abo\_bjo\_vasa\_v1.sav

### Case Processing Summary

| Unweighted Cases <sup>a</sup> |                      | N     | Percent |
|-------------------------------|----------------------|-------|---------|
| Selected Cases                | Included in Analysis | 12475 | 100,0   |
|                               | Missing Cases        | 0     | ,0      |
|                               | Total                | 12475 | 100,0   |
| Unselected Cases              |                      | 0     | ,0      |
| Total                         |                      | 12475 | 100,0   |

a. If weight is in effect, see classification table for the total number of cases.

### Dependent Variable Encoding

| Original Value       | Internal Value |
|----------------------|----------------|
| 0 inget dödsfall     | 0              |
| 1 minst ett dödsfall | 1              |

## Categorical Variables Codings

|                                             |                   | Frequency | Parameter coding |       |
|---------------------------------------------|-------------------|-----------|------------------|-------|
|                                             |                   |           | (1)              | (2)   |
| VASTY2 (SAIR*10000)+VASTY                   | 403073101         | 365       | ,000             | ,000  |
|                                             | 403073102         | 362       | 1,000            | ,000  |
|                                             | 403073103         | 365       | ,000             | 1,000 |
|                                             | 403073202         | 365       | ,000             | ,000  |
|                                             | 403073203         | 365       | ,000             | ,000  |
|                                             | 403073204         | 330       | ,000             | ,000  |
|                                             | 403073303         | 364       | ,000             | ,000  |
|                                             | 403073651         | 362       | ,000             | ,000  |
|                                             | 403073771         | 365       | ,000             | ,000  |
|                                             | 403133102         | 341       | ,000             | ,000  |
|                                             | 403133106         | 365       | ,000             | ,000  |
|                                             | 403133107         | 365       | ,000             | ,000  |
|                                             | 403133109         | 365       | ,000             | ,000  |
|                                             | 403133202         | 365       | ,000             | ,000  |
|                                             | 403133203         | 365       | ,000             | ,000  |
|                                             | 403133204         | 365       | ,000             | ,000  |
|                                             | 403133315         | 177       | ,000             | ,000  |
|                                             | 403133322         | 365       | ,000             | ,000  |
|                                             | 403133401         | 362       | ,000             | ,000  |
|                                             | 403133402         | 365       | ,000             | ,000  |
|                                             | 403133550         | 298       | ,000             | ,000  |
|                                             | 403133772         | 365       | ,000             | ,000  |
|                                             | 403135803         | 365       | ,000             | ,000  |
|                                             | 404060001         | 365       | ,000             | ,000  |
|                                             | 404060002         | 366       | ,000             | ,000  |
|                                             | 404310003         | 291       | ,000             | ,000  |
|                                             | 404310004         | 291       | ,000             | ,000  |
|                                             | 502300005         | 366       | ,000             | ,000  |
|                                             | 502300006         | 225       | ,000             | ,000  |
|                                             | 502300007         | 366       | ,000             | ,000  |
|                                             | 502300214         | 366       | ,000             | ,000  |
|                                             | 502300411         | 366       | ,000             | ,000  |
|                                             | 502300415         | 360       | ,000             | ,000  |
|                                             | 502300416         | 363       | ,000             | ,000  |
|                                             | 502300811         | 364       | ,000             | ,000  |
|                                             | 502300913         | 315       | ,000             | ,000  |
| bv2 belastning vs paoncil halva intervallet | 1 medelbelastning | 2788      | ,000             | ,000  |
|                                             | 2 underbelastning | 4419      | 1,000            | ,000  |
|                                             | 3 överbelastning  | 5268      | ,000             | 1,000 |

## Categorical Variables Codings

|                                             |                   | Parameter coding |       |       |
|---------------------------------------------|-------------------|------------------|-------|-------|
|                                             |                   | (3)              | (4)   | (5)   |
| VASTY2 (SAIR*10000)+VASTY                   | 403073101         | ,000             | ,000  | ,000  |
|                                             | 403073102         | ,000             | ,000  | ,000  |
|                                             | 403073103         | ,000             | ,000  | ,000  |
|                                             | 403073202         | 1,000            | ,000  | ,000  |
|                                             | 403073203         | ,000             | 1,000 | ,000  |
|                                             | 403073204         | ,000             | ,000  | 1,000 |
|                                             | 403073303         | ,000             | ,000  | ,000  |
|                                             | 403073651         | ,000             | ,000  | ,000  |
|                                             | 403073771         | ,000             | ,000  | ,000  |
|                                             | 403133102         | ,000             | ,000  | ,000  |
|                                             | 403133106         | ,000             | ,000  | ,000  |
|                                             | 403133107         | ,000             | ,000  | ,000  |
|                                             | 403133109         | ,000             | ,000  | ,000  |
|                                             | 403133202         | ,000             | ,000  | ,000  |
|                                             | 403133203         | ,000             | ,000  | ,000  |
|                                             | 403133204         | ,000             | ,000  | ,000  |
|                                             | 403133315         | ,000             | ,000  | ,000  |
|                                             | 403133322         | ,000             | ,000  | ,000  |
|                                             | 403133401         | ,000             | ,000  | ,000  |
|                                             | 403133402         | ,000             | ,000  | ,000  |
|                                             | 403133550         | ,000             | ,000  | ,000  |
|                                             | 403133772         | ,000             | ,000  | ,000  |
|                                             | 403135803         | ,000             | ,000  | ,000  |
|                                             | 404060001         | ,000             | ,000  | ,000  |
|                                             | 404060002         | ,000             | ,000  | ,000  |
|                                             | 404310003         | ,000             | ,000  | ,000  |
|                                             | 404310004         | ,000             | ,000  | ,000  |
|                                             | 502300005         | ,000             | ,000  | ,000  |
|                                             | 502300006         | ,000             | ,000  | ,000  |
|                                             | 502300007         | ,000             | ,000  | ,000  |
|                                             | 502300214         | ,000             | ,000  | ,000  |
|                                             | 502300411         | ,000             | ,000  | ,000  |
|                                             | 502300415         | ,000             | ,000  | ,000  |
|                                             | 502300416         | ,000             | ,000  | ,000  |
|                                             | 502300811         | ,000             | ,000  | ,000  |
|                                             | 502300913         | ,000             | ,000  | ,000  |
| bv2 belastning vs paoncil halva intervallet | 1 medelbelastning |                  |       |       |
|                                             | 2 underbelastning |                  |       |       |
|                                             | 3 överbelastning  |                  |       |       |

## Categorical Variables Codings

|                                             |                   | Parameter coding |       |       |
|---------------------------------------------|-------------------|------------------|-------|-------|
|                                             |                   | (6)              | (7)   | (8)   |
| VASTY2 (SAIR*10000)+VASTY                   | 403073101         | ,000             | ,000  | ,000  |
|                                             | 403073102         | ,000             | ,000  | ,000  |
|                                             | 403073103         | ,000             | ,000  | ,000  |
|                                             | 403073202         | ,000             | ,000  | ,000  |
|                                             | 403073203         | ,000             | ,000  | ,000  |
|                                             | 403073204         | ,000             | ,000  | ,000  |
|                                             | 403073303         | 1,000            | ,000  | ,000  |
|                                             | 403073651         | ,000             | 1,000 | ,000  |
|                                             | 403073771         | ,000             | ,000  | 1,000 |
|                                             | 403133102         | ,000             | ,000  | ,000  |
|                                             | 403133106         | ,000             | ,000  | ,000  |
|                                             | 403133107         | ,000             | ,000  | ,000  |
|                                             | 403133109         | ,000             | ,000  | ,000  |
|                                             | 403133202         | ,000             | ,000  | ,000  |
|                                             | 403133203         | ,000             | ,000  | ,000  |
|                                             | 403133204         | ,000             | ,000  | ,000  |
|                                             | 403133315         | ,000             | ,000  | ,000  |
|                                             | 403133322         | ,000             | ,000  | ,000  |
|                                             | 403133401         | ,000             | ,000  | ,000  |
|                                             | 403133402         | ,000             | ,000  | ,000  |
|                                             | 403133550         | ,000             | ,000  | ,000  |
|                                             | 403133772         | ,000             | ,000  | ,000  |
|                                             | 403135803         | ,000             | ,000  | ,000  |
|                                             | 404060001         | ,000             | ,000  | ,000  |
|                                             | 404060002         | ,000             | ,000  | ,000  |
|                                             | 404310003         | ,000             | ,000  | ,000  |
|                                             | 404310004         | ,000             | ,000  | ,000  |
|                                             | 502300005         | ,000             | ,000  | ,000  |
|                                             | 502300006         | ,000             | ,000  | ,000  |
|                                             | 502300007         | ,000             | ,000  | ,000  |
|                                             | 502300214         | ,000             | ,000  | ,000  |
|                                             | 502300411         | ,000             | ,000  | ,000  |
|                                             | 502300415         | ,000             | ,000  | ,000  |
|                                             | 502300416         | ,000             | ,000  | ,000  |
|                                             | 502300811         | ,000             | ,000  | ,000  |
|                                             | 502300913         | ,000             | ,000  | ,000  |
| bv2 belastning vs paoncil halva intervallet | 1 medelbelastning |                  |       |       |
|                                             | 2 underbelastning |                  |       |       |
|                                             | 3 överbelastning  |                  |       |       |

## Categorical Variables Codings

|                                             |                   | Parameter coding |       |       |
|---------------------------------------------|-------------------|------------------|-------|-------|
|                                             |                   | (9)              | (10)  | (11)  |
| VASTY2 (SAIR*10000)+VASTY                   | 403073101         | ,000             | ,000  | ,000  |
|                                             | 403073102         | ,000             | ,000  | ,000  |
|                                             | 403073103         | ,000             | ,000  | ,000  |
|                                             | 403073202         | ,000             | ,000  | ,000  |
|                                             | 403073203         | ,000             | ,000  | ,000  |
|                                             | 403073204         | ,000             | ,000  | ,000  |
|                                             | 403073303         | ,000             | ,000  | ,000  |
|                                             | 403073651         | ,000             | ,000  | ,000  |
|                                             | 403073771         | ,000             | ,000  | ,000  |
|                                             | 403133102         | 1,000            | ,000  | ,000  |
|                                             | 403133106         | ,000             | 1,000 | ,000  |
|                                             | 403133107         | ,000             | ,000  | 1,000 |
|                                             | 403133109         | ,000             | ,000  | ,000  |
|                                             | 403133202         | ,000             | ,000  | ,000  |
|                                             | 403133203         | ,000             | ,000  | ,000  |
|                                             | 403133204         | ,000             | ,000  | ,000  |
|                                             | 403133315         | ,000             | ,000  | ,000  |
|                                             | 403133322         | ,000             | ,000  | ,000  |
|                                             | 403133401         | ,000             | ,000  | ,000  |
|                                             | 403133402         | ,000             | ,000  | ,000  |
|                                             | 403133550         | ,000             | ,000  | ,000  |
|                                             | 403133772         | ,000             | ,000  | ,000  |
|                                             | 403135803         | ,000             | ,000  | ,000  |
|                                             | 404060001         | ,000             | ,000  | ,000  |
|                                             | 404060002         | ,000             | ,000  | ,000  |
|                                             | 404310003         | ,000             | ,000  | ,000  |
|                                             | 404310004         | ,000             | ,000  | ,000  |
|                                             | 502300005         | ,000             | ,000  | ,000  |
|                                             | 502300006         | ,000             | ,000  | ,000  |
|                                             | 502300007         | ,000             | ,000  | ,000  |
|                                             | 502300214         | ,000             | ,000  | ,000  |
|                                             | 502300411         | ,000             | ,000  | ,000  |
|                                             | 502300415         | ,000             | ,000  | ,000  |
|                                             | 502300416         | ,000             | ,000  | ,000  |
|                                             | 502300811         | ,000             | ,000  | ,000  |
|                                             | 502300913         | ,000             | ,000  | ,000  |
| bv2 belastning vs paoncil halva intervallet | 1 medelbelastning |                  |       |       |
|                                             | 2 underbelastning |                  |       |       |
|                                             | 3 överbelastning  |                  |       |       |

## Categorical Variables Codings

|                                             |                   | Parameter coding |       |       |
|---------------------------------------------|-------------------|------------------|-------|-------|
|                                             |                   | (12)             | (13)  | (14)  |
| VASTY2 (SAIR*10000)+VASTY                   | 403073101         | ,000             | ,000  | ,000  |
|                                             | 403073102         | ,000             | ,000  | ,000  |
|                                             | 403073103         | ,000             | ,000  | ,000  |
|                                             | 403073202         | ,000             | ,000  | ,000  |
|                                             | 403073203         | ,000             | ,000  | ,000  |
|                                             | 403073204         | ,000             | ,000  | ,000  |
|                                             | 403073303         | ,000             | ,000  | ,000  |
|                                             | 403073651         | ,000             | ,000  | ,000  |
|                                             | 403073771         | ,000             | ,000  | ,000  |
|                                             | 403133102         | ,000             | ,000  | ,000  |
|                                             | 403133106         | ,000             | ,000  | ,000  |
|                                             | 403133107         | ,000             | ,000  | ,000  |
|                                             | 403133109         | 1,000            | ,000  | ,000  |
|                                             | 403133202         | ,000             | 1,000 | ,000  |
|                                             | 403133203         | ,000             | ,000  | 1,000 |
|                                             | 403133204         | ,000             | ,000  | ,000  |
|                                             | 403133315         | ,000             | ,000  | ,000  |
|                                             | 403133322         | ,000             | ,000  | ,000  |
|                                             | 403133401         | ,000             | ,000  | ,000  |
|                                             | 403133402         | ,000             | ,000  | ,000  |
|                                             | 403133550         | ,000             | ,000  | ,000  |
|                                             | 403133772         | ,000             | ,000  | ,000  |
|                                             | 403135803         | ,000             | ,000  | ,000  |
|                                             | 404060001         | ,000             | ,000  | ,000  |
|                                             | 404060002         | ,000             | ,000  | ,000  |
|                                             | 404310003         | ,000             | ,000  | ,000  |
|                                             | 404310004         | ,000             | ,000  | ,000  |
|                                             | 502300005         | ,000             | ,000  | ,000  |
|                                             | 502300006         | ,000             | ,000  | ,000  |
|                                             | 502300007         | ,000             | ,000  | ,000  |
|                                             | 502300214         | ,000             | ,000  | ,000  |
|                                             | 502300411         | ,000             | ,000  | ,000  |
|                                             | 502300415         | ,000             | ,000  | ,000  |
|                                             | 502300416         | ,000             | ,000  | ,000  |
|                                             | 502300811         | ,000             | ,000  | ,000  |
|                                             | 502300913         | ,000             | ,000  | ,000  |
| bv2 belastning vs paoncil halva intervallet | 1 medelbelastning |                  |       |       |
|                                             | 2 underbelastning |                  |       |       |
|                                             | 3 överbelastning  |                  |       |       |



## Categorical Variables Codings

|                                             |                   | Parameter coding |       |       |
|---------------------------------------------|-------------------|------------------|-------|-------|
|                                             |                   | (15)             | (16)  | (17)  |
| VASTY2 (SAIR*10000)+VASTY                   | 403073101         | ,000             | ,000  | ,000  |
|                                             | 403073102         | ,000             | ,000  | ,000  |
|                                             | 403073103         | ,000             | ,000  | ,000  |
|                                             | 403073202         | ,000             | ,000  | ,000  |
|                                             | 403073203         | ,000             | ,000  | ,000  |
|                                             | 403073204         | ,000             | ,000  | ,000  |
|                                             | 403073303         | ,000             | ,000  | ,000  |
|                                             | 403073651         | ,000             | ,000  | ,000  |
|                                             | 403073771         | ,000             | ,000  | ,000  |
|                                             | 403133102         | ,000             | ,000  | ,000  |
|                                             | 403133106         | ,000             | ,000  | ,000  |
|                                             | 403133107         | ,000             | ,000  | ,000  |
|                                             | 403133109         | ,000             | ,000  | ,000  |
|                                             | 403133202         | ,000             | ,000  | ,000  |
|                                             | 403133203         | ,000             | ,000  | ,000  |
|                                             | 403133204         | 1,000            | ,000  | ,000  |
|                                             | 403133315         | ,000             | 1,000 | ,000  |
|                                             | 403133322         | ,000             | ,000  | 1,000 |
|                                             | 403133401         | ,000             | ,000  | ,000  |
|                                             | 403133402         | ,000             | ,000  | ,000  |
|                                             | 403133550         | ,000             | ,000  | ,000  |
|                                             | 403133772         | ,000             | ,000  | ,000  |
|                                             | 403135803         | ,000             | ,000  | ,000  |
|                                             | 404060001         | ,000             | ,000  | ,000  |
|                                             | 404060002         | ,000             | ,000  | ,000  |
|                                             | 404310003         | ,000             | ,000  | ,000  |
|                                             | 404310004         | ,000             | ,000  | ,000  |
|                                             | 502300005         | ,000             | ,000  | ,000  |
|                                             | 502300006         | ,000             | ,000  | ,000  |
|                                             | 502300007         | ,000             | ,000  | ,000  |
|                                             | 502300214         | ,000             | ,000  | ,000  |
|                                             | 502300411         | ,000             | ,000  | ,000  |
|                                             | 502300415         | ,000             | ,000  | ,000  |
|                                             | 502300416         | ,000             | ,000  | ,000  |
|                                             | 502300811         | ,000             | ,000  | ,000  |
|                                             | 502300913         | ,000             | ,000  | ,000  |
| bv2 belastning vs paoncil halva intervallet | 1 medelbelastning |                  |       |       |
|                                             | 2 underbelastning |                  |       |       |
|                                             | 3 överbelastning  |                  |       |       |

## Categorical Variables Codings

|                                             |                   | Parameter coding |       |       |
|---------------------------------------------|-------------------|------------------|-------|-------|
|                                             |                   | (18)             | (19)  | (20)  |
| VASTY2 (SAIR*10000)+VASTY                   | 403073101         | ,000             | ,000  | ,000  |
|                                             | 403073102         | ,000             | ,000  | ,000  |
|                                             | 403073103         | ,000             | ,000  | ,000  |
|                                             | 403073202         | ,000             | ,000  | ,000  |
|                                             | 403073203         | ,000             | ,000  | ,000  |
|                                             | 403073204         | ,000             | ,000  | ,000  |
|                                             | 403073303         | ,000             | ,000  | ,000  |
|                                             | 403073651         | ,000             | ,000  | ,000  |
|                                             | 403073771         | ,000             | ,000  | ,000  |
|                                             | 403133102         | ,000             | ,000  | ,000  |
|                                             | 403133106         | ,000             | ,000  | ,000  |
|                                             | 403133107         | ,000             | ,000  | ,000  |
|                                             | 403133109         | ,000             | ,000  | ,000  |
|                                             | 403133202         | ,000             | ,000  | ,000  |
|                                             | 403133203         | ,000             | ,000  | ,000  |
|                                             | 403133204         | ,000             | ,000  | ,000  |
|                                             | 403133315         | ,000             | ,000  | ,000  |
|                                             | 403133322         | ,000             | ,000  | ,000  |
|                                             | 403133401         | 1,000            | ,000  | ,000  |
|                                             | 403133402         | ,000             | 1,000 | ,000  |
|                                             | 403133550         | ,000             | ,000  | 1,000 |
|                                             | 403133772         | ,000             | ,000  | ,000  |
|                                             | 403135803         | ,000             | ,000  | ,000  |
|                                             | 404060001         | ,000             | ,000  | ,000  |
|                                             | 404060002         | ,000             | ,000  | ,000  |
|                                             | 404310003         | ,000             | ,000  | ,000  |
|                                             | 404310004         | ,000             | ,000  | ,000  |
|                                             | 502300005         | ,000             | ,000  | ,000  |
|                                             | 502300006         | ,000             | ,000  | ,000  |
|                                             | 502300007         | ,000             | ,000  | ,000  |
|                                             | 502300214         | ,000             | ,000  | ,000  |
|                                             | 502300411         | ,000             | ,000  | ,000  |
|                                             | 502300415         | ,000             | ,000  | ,000  |
|                                             | 502300416         | ,000             | ,000  | ,000  |
|                                             | 502300811         | ,000             | ,000  | ,000  |
|                                             | 502300913         | ,000             | ,000  | ,000  |
| bv2 belastning vs paoncil halva intervallet | 1 medelbelastning |                  |       |       |
|                                             | 2 underbelastning |                  |       |       |
|                                             | 3 överbelastning  |                  |       |       |

## Categorical Variables Codings

|                                             |                   | Parameter coding |       |       |
|---------------------------------------------|-------------------|------------------|-------|-------|
|                                             |                   | (21)             | (22)  | (23)  |
| VASTY2 (SAIR*10000)+VASTY                   | 403073101         | ,000             | ,000  | ,000  |
|                                             | 403073102         | ,000             | ,000  | ,000  |
|                                             | 403073103         | ,000             | ,000  | ,000  |
|                                             | 403073202         | ,000             | ,000  | ,000  |
|                                             | 403073203         | ,000             | ,000  | ,000  |
|                                             | 403073204         | ,000             | ,000  | ,000  |
|                                             | 403073303         | ,000             | ,000  | ,000  |
|                                             | 403073651         | ,000             | ,000  | ,000  |
|                                             | 403073771         | ,000             | ,000  | ,000  |
|                                             | 403133102         | ,000             | ,000  | ,000  |
|                                             | 403133106         | ,000             | ,000  | ,000  |
|                                             | 403133107         | ,000             | ,000  | ,000  |
|                                             | 403133109         | ,000             | ,000  | ,000  |
|                                             | 403133202         | ,000             | ,000  | ,000  |
|                                             | 403133203         | ,000             | ,000  | ,000  |
|                                             | 403133204         | ,000             | ,000  | ,000  |
|                                             | 403133315         | ,000             | ,000  | ,000  |
|                                             | 403133322         | ,000             | ,000  | ,000  |
|                                             | 403133401         | ,000             | ,000  | ,000  |
|                                             | 403133402         | ,000             | ,000  | ,000  |
|                                             | 403133550         | ,000             | ,000  | ,000  |
|                                             | 403133772         | 1,000            | ,000  | ,000  |
|                                             | 403135803         | ,000             | 1,000 | ,000  |
|                                             | 404060001         | ,000             | ,000  | 1,000 |
|                                             | 404060002         | ,000             | ,000  | ,000  |
|                                             | 404310003         | ,000             | ,000  | ,000  |
|                                             | 404310004         | ,000             | ,000  | ,000  |
|                                             | 502300005         | ,000             | ,000  | ,000  |
|                                             | 502300006         | ,000             | ,000  | ,000  |
|                                             | 502300007         | ,000             | ,000  | ,000  |
|                                             | 502300214         | ,000             | ,000  | ,000  |
|                                             | 502300411         | ,000             | ,000  | ,000  |
|                                             | 502300415         | ,000             | ,000  | ,000  |
|                                             | 502300416         | ,000             | ,000  | ,000  |
|                                             | 502300811         | ,000             | ,000  | ,000  |
|                                             | 502300913         | ,000             | ,000  | ,000  |
| bv2 belastning vs paoncil halva intervallet | 1 medelbelastning |                  |       |       |
|                                             | 2 underbelastning |                  |       |       |
|                                             | 3 överbelastning  |                  |       |       |

## Categorical Variables Codings

|                                             |                   | Parameter coding |       |       |
|---------------------------------------------|-------------------|------------------|-------|-------|
|                                             |                   | (24)             | (25)  | (26)  |
| VASTY2 (SAIR*10000)+VASTY                   | 403073101         | ,000             | ,000  | ,000  |
|                                             | 403073102         | ,000             | ,000  | ,000  |
|                                             | 403073103         | ,000             | ,000  | ,000  |
|                                             | 403073202         | ,000             | ,000  | ,000  |
|                                             | 403073203         | ,000             | ,000  | ,000  |
|                                             | 403073204         | ,000             | ,000  | ,000  |
|                                             | 403073303         | ,000             | ,000  | ,000  |
|                                             | 403073651         | ,000             | ,000  | ,000  |
|                                             | 403073771         | ,000             | ,000  | ,000  |
|                                             | 403133102         | ,000             | ,000  | ,000  |
|                                             | 403133106         | ,000             | ,000  | ,000  |
|                                             | 403133107         | ,000             | ,000  | ,000  |
|                                             | 403133109         | ,000             | ,000  | ,000  |
|                                             | 403133202         | ,000             | ,000  | ,000  |
|                                             | 403133203         | ,000             | ,000  | ,000  |
|                                             | 403133204         | ,000             | ,000  | ,000  |
|                                             | 403133315         | ,000             | ,000  | ,000  |
|                                             | 403133322         | ,000             | ,000  | ,000  |
|                                             | 403133401         | ,000             | ,000  | ,000  |
|                                             | 403133402         | ,000             | ,000  | ,000  |
|                                             | 403133550         | ,000             | ,000  | ,000  |
|                                             | 403133772         | ,000             | ,000  | ,000  |
|                                             | 403135803         | ,000             | ,000  | ,000  |
|                                             | 404060001         | ,000             | ,000  | ,000  |
|                                             | 404060002         | 1,000            | ,000  | ,000  |
|                                             | 404310003         | ,000             | 1,000 | ,000  |
|                                             | 404310004         | ,000             | ,000  | 1,000 |
|                                             | 502300005         | ,000             | ,000  | ,000  |
|                                             | 502300006         | ,000             | ,000  | ,000  |
|                                             | 502300007         | ,000             | ,000  | ,000  |
|                                             | 502300214         | ,000             | ,000  | ,000  |
|                                             | 502300411         | ,000             | ,000  | ,000  |
|                                             | 502300415         | ,000             | ,000  | ,000  |
|                                             | 502300416         | ,000             | ,000  | ,000  |
|                                             | 502300811         | ,000             | ,000  | ,000  |
|                                             | 502300913         | ,000             | ,000  | ,000  |
| bv2 belastning vs paoncil halva intervallet | 1 medelbelastning |                  |       |       |
|                                             | 2 underbelastning |                  |       |       |
|                                             | 3 överbelastning  |                  |       |       |

## Categorical Variables Codings

|                                             |                   | Parameter coding |       |       |
|---------------------------------------------|-------------------|------------------|-------|-------|
|                                             |                   | (27)             | (28)  | (29)  |
| VASTY2 (SAIR*10000)+VASTY                   | 403073101         | ,000             | ,000  | ,000  |
|                                             | 403073102         | ,000             | ,000  | ,000  |
|                                             | 403073103         | ,000             | ,000  | ,000  |
|                                             | 403073202         | ,000             | ,000  | ,000  |
|                                             | 403073203         | ,000             | ,000  | ,000  |
|                                             | 403073204         | ,000             | ,000  | ,000  |
|                                             | 403073303         | ,000             | ,000  | ,000  |
|                                             | 403073651         | ,000             | ,000  | ,000  |
|                                             | 403073771         | ,000             | ,000  | ,000  |
|                                             | 403133102         | ,000             | ,000  | ,000  |
|                                             | 403133106         | ,000             | ,000  | ,000  |
|                                             | 403133107         | ,000             | ,000  | ,000  |
|                                             | 403133109         | ,000             | ,000  | ,000  |
|                                             | 403133202         | ,000             | ,000  | ,000  |
|                                             | 403133203         | ,000             | ,000  | ,000  |
|                                             | 403133204         | ,000             | ,000  | ,000  |
|                                             | 403133315         | ,000             | ,000  | ,000  |
|                                             | 403133322         | ,000             | ,000  | ,000  |
|                                             | 403133401         | ,000             | ,000  | ,000  |
|                                             | 403133402         | ,000             | ,000  | ,000  |
|                                             | 403133550         | ,000             | ,000  | ,000  |
|                                             | 403133772         | ,000             | ,000  | ,000  |
|                                             | 403135803         | ,000             | ,000  | ,000  |
|                                             | 404060001         | ,000             | ,000  | ,000  |
|                                             | 404060002         | ,000             | ,000  | ,000  |
|                                             | 404310003         | ,000             | ,000  | ,000  |
|                                             | 404310004         | ,000             | ,000  | ,000  |
|                                             | 502300005         | 1,000            | ,000  | ,000  |
|                                             | 502300006         | ,000             | 1,000 | ,000  |
|                                             | 502300007         | ,000             | ,000  | 1,000 |
|                                             | 502300214         | ,000             | ,000  | ,000  |
|                                             | 502300411         | ,000             | ,000  | ,000  |
|                                             | 502300415         | ,000             | ,000  | ,000  |
|                                             | 502300416         | ,000             | ,000  | ,000  |
|                                             | 502300811         | ,000             | ,000  | ,000  |
|                                             | 502300913         | ,000             | ,000  | ,000  |
| bv2 belastning vs paoncil halva intervallet | 1 medelbelastning |                  |       |       |
|                                             | 2 underbelastning |                  |       |       |
|                                             | 3 överbelastning  |                  |       |       |

## Categorical Variables Codings

|                                             |                   | Parameter coding |       |       |
|---------------------------------------------|-------------------|------------------|-------|-------|
|                                             |                   | (30)             | (31)  | (32)  |
| VASTY2 (SAIR*10000)+VASTY                   | 403073101         | ,000             | ,000  | ,000  |
|                                             | 403073102         | ,000             | ,000  | ,000  |
|                                             | 403073103         | ,000             | ,000  | ,000  |
|                                             | 403073202         | ,000             | ,000  | ,000  |
|                                             | 403073203         | ,000             | ,000  | ,000  |
|                                             | 403073204         | ,000             | ,000  | ,000  |
|                                             | 403073303         | ,000             | ,000  | ,000  |
|                                             | 403073651         | ,000             | ,000  | ,000  |
|                                             | 403073771         | ,000             | ,000  | ,000  |
|                                             | 403133102         | ,000             | ,000  | ,000  |
|                                             | 403133106         | ,000             | ,000  | ,000  |
|                                             | 403133107         | ,000             | ,000  | ,000  |
|                                             | 403133109         | ,000             | ,000  | ,000  |
|                                             | 403133202         | ,000             | ,000  | ,000  |
|                                             | 403133203         | ,000             | ,000  | ,000  |
|                                             | 403133204         | ,000             | ,000  | ,000  |
|                                             | 403133315         | ,000             | ,000  | ,000  |
|                                             | 403133322         | ,000             | ,000  | ,000  |
|                                             | 403133401         | ,000             | ,000  | ,000  |
|                                             | 403133402         | ,000             | ,000  | ,000  |
|                                             | 403133550         | ,000             | ,000  | ,000  |
|                                             | 403133772         | ,000             | ,000  | ,000  |
|                                             | 403135803         | ,000             | ,000  | ,000  |
|                                             | 404060001         | ,000             | ,000  | ,000  |
|                                             | 404060002         | ,000             | ,000  | ,000  |
|                                             | 404310003         | ,000             | ,000  | ,000  |
|                                             | 404310004         | ,000             | ,000  | ,000  |
|                                             | 502300005         | ,000             | ,000  | ,000  |
|                                             | 502300006         | ,000             | ,000  | ,000  |
|                                             | 502300007         | ,000             | ,000  | ,000  |
|                                             | 502300214         | 1,000            | ,000  | ,000  |
|                                             | 502300411         | ,000             | 1,000 | ,000  |
|                                             | 502300415         | ,000             | ,000  | 1,000 |
|                                             | 502300416         | ,000             | ,000  | ,000  |
|                                             | 502300811         | ,000             | ,000  | ,000  |
|                                             | 502300913         | ,000             | ,000  | ,000  |
| bv2 belastning vs paoncil halva intervallet | 1 medelbelastning |                  |       |       |
|                                             | 2 underbelastning |                  |       |       |
|                                             | 3 överbelastning  |                  |       |       |

## Categorical Variables Codings

|                                             |                   | Parameter coding |       |       |
|---------------------------------------------|-------------------|------------------|-------|-------|
|                                             |                   | (33)             | (34)  | (35)  |
| VASTY2 (SAIR*10000)+VASTY                   | 403073101         | ,000             | ,000  | ,000  |
|                                             | 403073102         | ,000             | ,000  | ,000  |
|                                             | 403073103         | ,000             | ,000  | ,000  |
|                                             | 403073202         | ,000             | ,000  | ,000  |
|                                             | 403073203         | ,000             | ,000  | ,000  |
|                                             | 403073204         | ,000             | ,000  | ,000  |
|                                             | 403073303         | ,000             | ,000  | ,000  |
|                                             | 403073651         | ,000             | ,000  | ,000  |
|                                             | 403073771         | ,000             | ,000  | ,000  |
|                                             | 403133102         | ,000             | ,000  | ,000  |
|                                             | 403133106         | ,000             | ,000  | ,000  |
|                                             | 403133107         | ,000             | ,000  | ,000  |
|                                             | 403133109         | ,000             | ,000  | ,000  |
|                                             | 403133202         | ,000             | ,000  | ,000  |
|                                             | 403133203         | ,000             | ,000  | ,000  |
|                                             | 403133204         | ,000             | ,000  | ,000  |
|                                             | 403133315         | ,000             | ,000  | ,000  |
|                                             | 403133322         | ,000             | ,000  | ,000  |
|                                             | 403133401         | ,000             | ,000  | ,000  |
|                                             | 403133402         | ,000             | ,000  | ,000  |
|                                             | 403133550         | ,000             | ,000  | ,000  |
|                                             | 403133772         | ,000             | ,000  | ,000  |
|                                             | 403135803         | ,000             | ,000  | ,000  |
|                                             | 404060001         | ,000             | ,000  | ,000  |
|                                             | 404060002         | ,000             | ,000  | ,000  |
|                                             | 404310003         | ,000             | ,000  | ,000  |
|                                             | 404310004         | ,000             | ,000  | ,000  |
|                                             | 502300005         | ,000             | ,000  | ,000  |
|                                             | 502300006         | ,000             | ,000  | ,000  |
|                                             | 502300007         | ,000             | ,000  | ,000  |
|                                             | 502300214         | ,000             | ,000  | ,000  |
|                                             | 502300411         | ,000             | ,000  | ,000  |
|                                             | 502300415         | ,000             | ,000  | ,000  |
|                                             | 502300416         | 1,000            | ,000  | ,000  |
|                                             | 502300811         | ,000             | 1,000 | ,000  |
|                                             | 502300913         | ,000             | ,000  | 1,000 |
| bv2 belastning vs paencil halva intervallet | 1 medelbelastning |                  |       |       |
|                                             | 2 underbelastning |                  |       |       |
|                                             | 3 överbelastning  |                  |       |       |

**Block 0: Beginning Block**

Classification Table<sup>a,b</sup>

| Observed           |                             |                      | Predicted                   |                      |
|--------------------|-----------------------------|----------------------|-----------------------------|----------------------|
|                    |                             |                      | dod01 dödsfall ja eller nej |                      |
|                    |                             |                      | 0 inget dödsfall            | 1 minst ett dödsfall |
| Step 0             | dod01 dödsfall ja eller nej | 0 inget dödsfall     | 11839                       | 0                    |
|                    |                             | 1 minst ett dödsfall | 636                         | 0                    |
| Overall Percentage |                             |                      |                             |                      |

Classification Table<sup>a,b</sup>

| Observed           |                             |                      | Predicted          |
|--------------------|-----------------------------|----------------------|--------------------|
|                    |                             |                      | Percentage Correct |
| Step 0             | dod01 dödsfall ja eller nej | 0 inget dödsfall     | 100,0              |
|                    |                             | 1 minst ett dödsfall | ,0                 |
| Overall Percentage |                             |                      | 94,9               |

a. Constant is included in the model.

b. The cut value is ,500

Variables in the Equation

|                 | B      | S.E. | Wald     | df | Sig. | Exp(B) |
|-----------------|--------|------|----------|----|------|--------|
| Step 0 Constant | -2,924 | ,041 | 5160,279 | 1  | ,000 | ,054   |



## Variables not in the Equation

|        |                    | Score   | df | Sig. |
|--------|--------------------|---------|----|------|
| Step 0 | Variables          |         |    |      |
|        | bv2                | 54,080  | 2  | ,000 |
|        | bv2(1)             | 43,266  | 1  | ,000 |
|        | bv2(2)             | 45,028  | 1  | ,000 |
|        | VASTY2             | 635,545 | 35 | ,000 |
|        | VASTY2(1)          | 2,519   | 1  | ,113 |
|        | VASTY2(2)          | 6,299   | 1  | ,012 |
|        | VASTY2(3)          | 8,957   | 1  | ,003 |
|        | VASTY2(4)          | ,151    | 1  | ,698 |
|        | VASTY2(5)          | 7,537   | 1  | ,006 |
|        | VASTY2(6)          | 20,142  | 1  | ,000 |
|        | VASTY2(7)          | 127,387 | 1  | ,000 |
|        | VASTY2(8)          | 8,957   | 1  | ,003 |
|        | VASTY2(9)          | ,163    | 1  | ,687 |
|        | VASTY2(10)         | 7,570   | 1  | ,006 |
|        | VASTY2(11)         | ,113    | 1  | ,737 |
|        | VASTY2(12)         | 47,021  | 1  | ,000 |
|        | VASTY2(13)         | 90,515  | 1  | ,000 |
|        | VASTY2(14)         | 7,570   | 1  | ,006 |
|        | VASTY2(15)         | ,151    | 1  | ,698 |
|        | VASTY2(16)         | 4,298   | 1  | ,038 |
|        | VASTY2(17)         | 20,199  | 1  | ,000 |
|        | VASTY2(18)         | 17,916  | 1  | ,000 |
|        | VASTY2(19)         | 18,086  | 1  | ,000 |
|        | VASTY2(20)         | 10,563  | 1  | ,001 |
|        | VASTY2(21)         | 1,696   | 1  | ,193 |
|        | VASTY2(22)         | 26,693  | 1  | ,000 |
|        | VASTY2(23)         | 1,125   | 1  | ,289 |
|        | VASTY2(24)         | 72,662  | 1  | ,000 |
|        | VASTY2(25)         | 2,477   | 1  | ,116 |
|        | VASTY2(26)         | 16,006  | 1  | ,000 |
|        | VASTY2(27)         | 20,256  | 1  | ,000 |
|        | VASTY2(28)         | 12,309  | 1  | ,000 |
|        | VASTY2(29)         | 20,256  | 1  | ,000 |
|        | VASTY2(30)         | 1,263   | 1  | ,261 |
|        | VASTY2(31)         | 20,256  | 1  | ,000 |
|        | VASTY2(32)         | 15,810  | 1  | ,000 |
|        | VASTY2(33)         | 17,973  | 1  | ,000 |
|        | VASTY2(34)         | ,693    | 1  | ,405 |
|        | VASTY2(35)         | 17,360  | 1  | ,000 |
|        | Overall Statistics | 650,444 | 37 | ,000 |

**Block 1: Method = Enter**

## Omnibus Tests of Model Coefficients

|        |       | Chi-square | df | Sig. |
|--------|-------|------------|----|------|
| Step 1 | Step  | 719,171    | 37 | ,000 |
|        | Block | 719,171    | 37 | ,000 |
|        | Model | 719,171    | 37 | ,000 |

## Model Summary

| Step | -2 Log likelihood     | Cox & Snell R Square | Nagelkerke R Square |
|------|-----------------------|----------------------|---------------------|
| 1    | 4305,671 <sup>a</sup> | ,056                 | ,169                |

a. Estimation terminated at iteration number 20 because maximum iterations has been reached. Final solution cannot be found.

Classification Table<sup>a</sup>

| Observed           |                             | Predicted                   |                      |   |
|--------------------|-----------------------------|-----------------------------|----------------------|---|
|                    |                             | dod01 dödsfall ja eller nej |                      |   |
|                    |                             | 0 inget dödsfall            | 1 minst ett dödsfall |   |
| Step 1             | dod01 dödsfall ja eller nej | 0 inget dödsfall            | 11839                | 0 |
|                    |                             | 1 minst ett dödsfall        | 636                  | 0 |
| Overall Percentage |                             |                             |                      |   |

Classification Table<sup>a</sup>

| Observed           |                             | Predicted          |
|--------------------|-----------------------------|--------------------|
|                    |                             | Percentage Correct |
| Step 1             | dod01 dödsfall ja eller nej | 100,0              |
|                    |                             | ,0                 |
| Overall Percentage |                             | 94,9               |

a. The cut value is ,500

## Variables in the Equation

|                     |            | B       | S.E.     | Wald    | df | Sig. | Exp(B) |
|---------------------|------------|---------|----------|---------|----|------|--------|
| Step 1 <sup>a</sup> | bv2        |         |          | 16,401  | 2  | ,000 |        |
|                     | bv2(1)     | -,135   | ,126     | 1,159   | 1  | ,282 | ,873   |
|                     | bv2(2)     | ,293    | ,110     | 7,157   | 1  | ,007 | 1,341  |
|                     | VASTY2     |         |          | 216,449 | 35 | ,000 |        |
|                     | VASTY2(1)  | ,588    | ,343     | 2,943   | 1  | ,086 | 1,800  |
|                     | VASTY2(2)  | ,713    | ,335     | 4,530   | 1  | ,033 | 2,040  |
|                     | VASTY2(3)  | ,667    | ,334     | 3,989   | 1  | ,046 | 1,948  |
|                     | VASTY2(4)  | ,057    | ,371     | ,023    | 1  | ,879 | 1,058  |
|                     | VASTY2(5)  | -,846   | ,495     | 2,928   | 1  | ,087 | ,429   |
|                     | VASTY2(6)  | -18,089 | 2102,200 | ,000    | 1  | ,993 | ,000   |
|                     | VASTY2(7)  | 1,507   | ,309     | 23,789  | 1  | ,000 | 4,512  |
|                     | VASTY2(8)  | ,740    | ,332     | 4,967   | 1  | ,026 | 2,097  |
|                     | VASTY2(9)  | ,277    | ,362     | ,585    | 1  | ,444 | 1,319  |
|                     | VASTY2(10) | ,726    | ,334     | 4,741   | 1  | ,029 | 2,067  |
|                     | VASTY2(11) | ,333    | ,357     | ,872    | 1  | ,350 | 1,396  |
|                     | VASTY2(12) | 1,226   | ,315     | 15,131  | 1  | ,000 | 3,407  |
|                     | VASTY2(13) | 1,380   | ,311     | 19,697  | 1  | ,000 | 3,975  |
|                     | VASTY2(14) | ,704    | ,334     | 4,444   | 1  | ,035 | 2,022  |
|                     | VASTY2(15) | ,118    | ,370     | ,102    | 1  | ,749 | 1,126  |
|                     | VASTY2(16) | -,884   | ,643     | 1,888   | 1  | ,169 | ,413   |
|                     | VASTY2(17) | -17,963 | 2099,524 | ,000    | 1  | ,993 | ,000   |
|                     | VASTY2(18) | -2,696  | 1,038    | 6,746   | 1  | ,009 | ,067   |
|                     | VASTY2(19) | -2,518  | 1,040    | 5,866   | 1  | ,015 | ,081   |
|                     | VASTY2(20) | -1,473  | ,642     | 5,267   | 1  | ,022 | ,229   |
|                     | VASTY2(21) | ,509    | ,345     | 2,171   | 1  | ,141 | 1,664  |
|                     | VASTY2(22) | 1,240   | ,322     | 14,832  | 1  | ,000 | 3,455  |
|                     | VASTY2(23) | ,535    | ,348     | 2,364   | 1  | ,124 | 1,707  |
|                     | VASTY2(24) | 1,327   | ,312     | 18,094  | 1  | ,000 | 3,771  |
|                     | VASTY2(25) | -,207   | ,435     | ,227    | 1  | ,634 | ,813   |
|                     | VASTY2(26) | -18,071 | 2350,974 | ,000    | 1  | ,994 | ,000   |
|                     | VASTY2(27) | -18,100 | 2096,455 | ,000    | 1  | ,993 | ,000   |
|                     | VASTY2(28) | -18,120 | 2675,298 | ,000    | 1  | ,995 | ,000   |
|                     | VASTY2(29) | -18,037 | 2096,602 | ,000    | 1  | ,993 | ,000   |
|                     | VASTY2(30) | -,060   | ,386     | ,024    | 1  | ,877 | ,942   |
|                     | VASTY2(31) | -18,023 | 2095,727 | ,000    | 1  | ,993 | ,000   |
|                     | VASTY2(32) | -1,954  | ,760     | 6,611   | 1  | ,010 | ,142   |
|                     | VASTY2(33) | -2,670  | 1,038    | 6,616   | 1  | ,010 | ,069   |
|                     | VASTY2(34) | ,442    | ,351     | 1,588   | 1  | ,208 | 1,556  |
|                     | VASTY2(35) | -18,119 | 2259,904 | ,000    | 1  | ,994 | ,000   |
|                     | Constant   | -3,248  | ,282     | 132,759 | 1  | ,000 | ,039   |

## Variables in the Equation

|                     |            | 95% C.I. for EXP(B) |       |
|---------------------|------------|---------------------|-------|
|                     |            | Lower               | Upper |
| Step 1 <sup>a</sup> | bv2        |                     |       |
|                     | bv2(1)     | ,683                | 1,117 |
|                     | bv2(2)     | 1,082               | 1,662 |
|                     | VASTY2     |                     |       |
|                     | VASTY2(1)  | ,920                | 3,525 |
|                     | VASTY2(2)  | 1,058               | 3,932 |
|                     | VASTY2(3)  | 1,012               | 3,749 |
|                     | VASTY2(4)  | ,512                | 2,189 |
|                     | VASTY2(5)  | ,163                | 1,131 |
|                     | VASTY2(6)  | ,000                | .     |
|                     | VASTY2(7)  | 2,463               | 8,267 |
|                     | VASTY2(8)  | 1,093               | 4,021 |
|                     | VASTY2(9)  | ,649                | 2,681 |
|                     | VASTY2(10) | 1,075               | 3,974 |
|                     | VASTY2(11) | ,693                | 2,810 |
|                     | VASTY2(12) | 1,837               | 6,318 |
|                     | VASTY2(13) | 2,161               | 7,310 |
|                     | VASTY2(14) | 1,051               | 3,889 |
|                     | VASTY2(15) | ,545                | 2,323 |
|                     | VASTY2(16) | ,117                | 1,458 |
|                     | VASTY2(17) | ,000                | .     |
|                     | VASTY2(18) | ,009                | ,516  |
|                     | VASTY2(19) | ,011                | ,619  |
|                     | VASTY2(20) | ,065                | ,806  |
|                     | VASTY2(21) | ,845                | 3,274 |
|                     | VASTY2(22) | 1,838               | 6,493 |
|                     | VASTY2(23) | ,863                | 3,374 |
|                     | VASTY2(24) | 2,046               | 6,951 |
|                     | VASTY2(25) | ,347                | 1,907 |
|                     | VASTY2(26) | ,000                | .     |
|                     | VASTY2(27) | ,000                | .     |
|                     | VASTY2(28) | ,000                | .     |
|                     | VASTY2(29) | ,000                | .     |
|                     | VASTY2(30) | ,442                | 2,007 |
|                     | VASTY2(31) | ,000                | .     |
|                     | VASTY2(32) | ,032                | ,628  |
|                     | VASTY2(33) | ,009                | ,530  |
|                     | VASTY2(34) | ,782                | 3,093 |
|                     | VASTY2(35) | ,000                | .     |
|                     | Constant   |                     |       |

a. Variable(s) entered on step 1: bv2, VASTY2.

```

1
2
3 LOGISTIC REGRESSION VARIABLES dod01
4   /METHOD=ENTER bv3 VASTY2
5   /CONTRAST (bv3)=Indicator(1)
6   /CONTRAST (VASTY2)=Indicator(1)
7   /PRINT=CI(95)
8   /CRITERIA=PIN(0.05) POUT(0.10) ITERATE(20) CUT(0.5).
9

```

## Logistic Regression

[DataSet6] C:\cWordjan\Rafaela\_VCS\alla\_tillsammans\abo\_bjo\_vasa\_v1.sav

### Case Processing Summary

| Unweighted Cases <sup>a</sup> |                      | N     | Percent |
|-------------------------------|----------------------|-------|---------|
| Selected Cases                | Included in Analysis | 12475 | 100,0   |
|                               | Missing Cases        | 0     | ,0      |
|                               | Total                | 12475 | 100,0   |
| Unselected Cases              |                      | 0     | ,0      |
| Total                         |                      | 12475 | 100,0   |

a. If weight is in effect, see classification table for the total number of cases.

### Dependent Variable Encoding

| Original Value       | Internal Value |
|----------------------|----------------|
| 0 inget dödsfall     | 0              |
| 1 minst ett dödsfall | 1              |

## Categorical Variables Codings

|                                              |                   | Frequency | Parameter coding |       |
|----------------------------------------------|-------------------|-----------|------------------|-------|
|                                              |                   |           | (1)              | (2)   |
| VASTY2 (SAIR*10000)+VASTY                    | 403073101         | 365       | ,000             | ,000  |
|                                              | 403073102         | 362       | 1,000            | ,000  |
|                                              | 403073103         | 365       | ,000             | 1,000 |
|                                              | 403073202         | 365       | ,000             | ,000  |
|                                              | 403073203         | 365       | ,000             | ,000  |
|                                              | 403073204         | 330       | ,000             | ,000  |
|                                              | 403073303         | 364       | ,000             | ,000  |
|                                              | 403073651         | 362       | ,000             | ,000  |
|                                              | 403073771         | 365       | ,000             | ,000  |
|                                              | 403133102         | 341       | ,000             | ,000  |
|                                              | 403133106         | 365       | ,000             | ,000  |
|                                              | 403133107         | 365       | ,000             | ,000  |
|                                              | 403133109         | 365       | ,000             | ,000  |
|                                              | 403133202         | 365       | ,000             | ,000  |
|                                              | 403133203         | 365       | ,000             | ,000  |
|                                              | 403133204         | 365       | ,000             | ,000  |
|                                              | 403133315         | 177       | ,000             | ,000  |
|                                              | 403133322         | 365       | ,000             | ,000  |
|                                              | 403133401         | 362       | ,000             | ,000  |
|                                              | 403133402         | 365       | ,000             | ,000  |
|                                              | 403133550         | 298       | ,000             | ,000  |
|                                              | 403133772         | 365       | ,000             | ,000  |
|                                              | 403135803         | 365       | ,000             | ,000  |
|                                              | 404060001         | 365       | ,000             | ,000  |
|                                              | 404060002         | 366       | ,000             | ,000  |
|                                              | 404310003         | 291       | ,000             | ,000  |
|                                              | 404310004         | 291       | ,000             | ,000  |
|                                              | 502300005         | 366       | ,000             | ,000  |
|                                              | 502300006         | 225       | ,000             | ,000  |
|                                              | 502300007         | 366       | ,000             | ,000  |
|                                              | 502300214         | 366       | ,000             | ,000  |
|                                              | 502300411         | 366       | ,000             | ,000  |
|                                              | 502300415         | 360       | ,000             | ,000  |
|                                              | 502300416         | 363       | ,000             | ,000  |
|                                              | 502300811         | 364       | ,000             | ,000  |
|                                              | 502300913         | 315       | ,000             | ,000  |
| bv3 belasnting vs paoncil dubbla intervallet | 1 medelbelastning | 9121      | ,000             | ,000  |
|                                              | 2 underbelastning | 1505      | 1,000            | ,000  |
|                                              | 3 överbelastning  | 1849      | ,000             | 1,000 |

## Categorical Variables Codings

|                                              |                   | Parameter coding |       |       |
|----------------------------------------------|-------------------|------------------|-------|-------|
|                                              |                   | (3)              | (4)   | (5)   |
| VASTY2 (SAIR*10000)+VASTY                    | 403073101         | ,000             | ,000  | ,000  |
|                                              | 403073102         | ,000             | ,000  | ,000  |
|                                              | 403073103         | ,000             | ,000  | ,000  |
|                                              | 403073202         | 1,000            | ,000  | ,000  |
|                                              | 403073203         | ,000             | 1,000 | ,000  |
|                                              | 403073204         | ,000             | ,000  | 1,000 |
|                                              | 403073303         | ,000             | ,000  | ,000  |
|                                              | 403073651         | ,000             | ,000  | ,000  |
|                                              | 403073771         | ,000             | ,000  | ,000  |
|                                              | 403133102         | ,000             | ,000  | ,000  |
|                                              | 403133106         | ,000             | ,000  | ,000  |
|                                              | 403133107         | ,000             | ,000  | ,000  |
|                                              | 403133109         | ,000             | ,000  | ,000  |
|                                              | 403133202         | ,000             | ,000  | ,000  |
|                                              | 403133203         | ,000             | ,000  | ,000  |
|                                              | 403133204         | ,000             | ,000  | ,000  |
|                                              | 403133315         | ,000             | ,000  | ,000  |
|                                              | 403133322         | ,000             | ,000  | ,000  |
|                                              | 403133401         | ,000             | ,000  | ,000  |
|                                              | 403133402         | ,000             | ,000  | ,000  |
|                                              | 403133550         | ,000             | ,000  | ,000  |
|                                              | 403133772         | ,000             | ,000  | ,000  |
|                                              | 403135803         | ,000             | ,000  | ,000  |
|                                              | 404060001         | ,000             | ,000  | ,000  |
|                                              | 404060002         | ,000             | ,000  | ,000  |
|                                              | 404310003         | ,000             | ,000  | ,000  |
|                                              | 404310004         | ,000             | ,000  | ,000  |
|                                              | 502300005         | ,000             | ,000  | ,000  |
|                                              | 502300006         | ,000             | ,000  | ,000  |
|                                              | 502300007         | ,000             | ,000  | ,000  |
|                                              | 502300214         | ,000             | ,000  | ,000  |
|                                              | 502300411         | ,000             | ,000  | ,000  |
|                                              | 502300415         | ,000             | ,000  | ,000  |
|                                              | 502300416         | ,000             | ,000  | ,000  |
|                                              | 502300811         | ,000             | ,000  | ,000  |
|                                              | 502300913         | ,000             | ,000  | ,000  |
| bv3 belasnting vs paoncil dubbla intervallet | 1 medelbelastning |                  |       |       |
|                                              | 2 underbelastning |                  |       |       |
|                                              | 3 överbelastning  |                  |       |       |

## Categorical Variables Codings

|                                              |                   | Parameter coding |       |       |
|----------------------------------------------|-------------------|------------------|-------|-------|
|                                              |                   | (6)              | (7)   | (8)   |
| VASTY2 (SAIR*10000)+VASTY                    | 403073101         | ,000             | ,000  | ,000  |
|                                              | 403073102         | ,000             | ,000  | ,000  |
|                                              | 403073103         | ,000             | ,000  | ,000  |
|                                              | 403073202         | ,000             | ,000  | ,000  |
|                                              | 403073203         | ,000             | ,000  | ,000  |
|                                              | 403073204         | ,000             | ,000  | ,000  |
|                                              | 403073303         | 1,000            | ,000  | ,000  |
|                                              | 403073651         | ,000             | 1,000 | ,000  |
|                                              | 403073771         | ,000             | ,000  | 1,000 |
|                                              | 403133102         | ,000             | ,000  | ,000  |
|                                              | 403133106         | ,000             | ,000  | ,000  |
|                                              | 403133107         | ,000             | ,000  | ,000  |
|                                              | 403133109         | ,000             | ,000  | ,000  |
|                                              | 403133202         | ,000             | ,000  | ,000  |
|                                              | 403133203         | ,000             | ,000  | ,000  |
|                                              | 403133204         | ,000             | ,000  | ,000  |
|                                              | 403133315         | ,000             | ,000  | ,000  |
|                                              | 403133322         | ,000             | ,000  | ,000  |
|                                              | 403133401         | ,000             | ,000  | ,000  |
|                                              | 403133402         | ,000             | ,000  | ,000  |
|                                              | 403133550         | ,000             | ,000  | ,000  |
|                                              | 403133772         | ,000             | ,000  | ,000  |
|                                              | 403135803         | ,000             | ,000  | ,000  |
|                                              | 404060001         | ,000             | ,000  | ,000  |
|                                              | 404060002         | ,000             | ,000  | ,000  |
|                                              | 404310003         | ,000             | ,000  | ,000  |
|                                              | 404310004         | ,000             | ,000  | ,000  |
|                                              | 502300005         | ,000             | ,000  | ,000  |
|                                              | 502300006         | ,000             | ,000  | ,000  |
|                                              | 502300007         | ,000             | ,000  | ,000  |
|                                              | 502300214         | ,000             | ,000  | ,000  |
|                                              | 502300411         | ,000             | ,000  | ,000  |
|                                              | 502300415         | ,000             | ,000  | ,000  |
|                                              | 502300416         | ,000             | ,000  | ,000  |
|                                              | 502300811         | ,000             | ,000  | ,000  |
|                                              | 502300913         | ,000             | ,000  | ,000  |
| bv3 belasnting vs paoncil dubbla intervallet | 1 medelbelastning |                  |       |       |
|                                              | 2 underbelastning |                  |       |       |
|                                              | 3 överbelastning  |                  |       |       |



## Categorical Variables Codings

|                                              |                   | Parameter coding |       |       |
|----------------------------------------------|-------------------|------------------|-------|-------|
|                                              |                   | (9)              | (10)  | (11)  |
| VASTY2 (SAIR*10000)+VASTY                    | 403073101         | ,000             | ,000  | ,000  |
|                                              | 403073102         | ,000             | ,000  | ,000  |
|                                              | 403073103         | ,000             | ,000  | ,000  |
|                                              | 403073202         | ,000             | ,000  | ,000  |
|                                              | 403073203         | ,000             | ,000  | ,000  |
|                                              | 403073204         | ,000             | ,000  | ,000  |
|                                              | 403073303         | ,000             | ,000  | ,000  |
|                                              | 403073651         | ,000             | ,000  | ,000  |
|                                              | 403073771         | ,000             | ,000  | ,000  |
|                                              | 403133102         | 1,000            | ,000  | ,000  |
|                                              | 403133106         | ,000             | 1,000 | ,000  |
|                                              | 403133107         | ,000             | ,000  | 1,000 |
|                                              | 403133109         | ,000             | ,000  | ,000  |
|                                              | 403133202         | ,000             | ,000  | ,000  |
|                                              | 403133203         | ,000             | ,000  | ,000  |
|                                              | 403133204         | ,000             | ,000  | ,000  |
|                                              | 403133315         | ,000             | ,000  | ,000  |
|                                              | 403133322         | ,000             | ,000  | ,000  |
|                                              | 403133401         | ,000             | ,000  | ,000  |
|                                              | 403133402         | ,000             | ,000  | ,000  |
|                                              | 403133550         | ,000             | ,000  | ,000  |
|                                              | 403133772         | ,000             | ,000  | ,000  |
|                                              | 403135803         | ,000             | ,000  | ,000  |
|                                              | 404060001         | ,000             | ,000  | ,000  |
|                                              | 404060002         | ,000             | ,000  | ,000  |
|                                              | 404310003         | ,000             | ,000  | ,000  |
|                                              | 404310004         | ,000             | ,000  | ,000  |
|                                              | 502300005         | ,000             | ,000  | ,000  |
|                                              | 502300006         | ,000             | ,000  | ,000  |
|                                              | 502300007         | ,000             | ,000  | ,000  |
|                                              | 502300214         | ,000             | ,000  | ,000  |
|                                              | 502300411         | ,000             | ,000  | ,000  |
|                                              | 502300415         | ,000             | ,000  | ,000  |
|                                              | 502300416         | ,000             | ,000  | ,000  |
|                                              | 502300811         | ,000             | ,000  | ,000  |
|                                              | 502300913         | ,000             | ,000  | ,000  |
| bv3 belasnting vs paoncil dubbla intervallet | 1 medelbelastning |                  |       |       |
|                                              | 2 underbelastning |                  |       |       |
|                                              | 3 överbelastning  |                  |       |       |

## Categorical Variables Codings

|                                              |                   | Parameter coding |       |       |
|----------------------------------------------|-------------------|------------------|-------|-------|
|                                              |                   | (12)             | (13)  | (14)  |
| VASTY2 (SAIR*10000)+VASTY                    | 403073101         | ,000             | ,000  | ,000  |
|                                              | 403073102         | ,000             | ,000  | ,000  |
|                                              | 403073103         | ,000             | ,000  | ,000  |
|                                              | 403073202         | ,000             | ,000  | ,000  |
|                                              | 403073203         | ,000             | ,000  | ,000  |
|                                              | 403073204         | ,000             | ,000  | ,000  |
|                                              | 403073303         | ,000             | ,000  | ,000  |
|                                              | 403073651         | ,000             | ,000  | ,000  |
|                                              | 403073771         | ,000             | ,000  | ,000  |
|                                              | 403133102         | ,000             | ,000  | ,000  |
|                                              | 403133106         | ,000             | ,000  | ,000  |
|                                              | 403133107         | ,000             | ,000  | ,000  |
|                                              | 403133109         | 1,000            | ,000  | ,000  |
|                                              | 403133202         | ,000             | 1,000 | ,000  |
|                                              | 403133203         | ,000             | ,000  | 1,000 |
|                                              | 403133204         | ,000             | ,000  | ,000  |
|                                              | 403133315         | ,000             | ,000  | ,000  |
|                                              | 403133322         | ,000             | ,000  | ,000  |
|                                              | 403133401         | ,000             | ,000  | ,000  |
|                                              | 403133402         | ,000             | ,000  | ,000  |
|                                              | 403133550         | ,000             | ,000  | ,000  |
|                                              | 403133772         | ,000             | ,000  | ,000  |
|                                              | 403135803         | ,000             | ,000  | ,000  |
|                                              | 404060001         | ,000             | ,000  | ,000  |
|                                              | 404060002         | ,000             | ,000  | ,000  |
|                                              | 404310003         | ,000             | ,000  | ,000  |
|                                              | 404310004         | ,000             | ,000  | ,000  |
|                                              | 502300005         | ,000             | ,000  | ,000  |
|                                              | 502300006         | ,000             | ,000  | ,000  |
|                                              | 502300007         | ,000             | ,000  | ,000  |
|                                              | 502300214         | ,000             | ,000  | ,000  |
|                                              | 502300411         | ,000             | ,000  | ,000  |
|                                              | 502300415         | ,000             | ,000  | ,000  |
|                                              | 502300416         | ,000             | ,000  | ,000  |
|                                              | 502300811         | ,000             | ,000  | ,000  |
|                                              | 502300913         | ,000             | ,000  | ,000  |
| bv3 belasnting vs paoncil dubbla intervallet | 1 medelbelastning |                  |       |       |
|                                              | 2 underbelastning |                  |       |       |
|                                              | 3 överbelastning  |                  |       |       |

## Categorical Variables Codings

|                                              |                   | Parameter coding |       |       |
|----------------------------------------------|-------------------|------------------|-------|-------|
|                                              |                   | (15)             | (16)  | (17)  |
| VASTY2 (SAIR*10000)+VASTY                    | 403073101         | ,000             | ,000  | ,000  |
|                                              | 403073102         | ,000             | ,000  | ,000  |
|                                              | 403073103         | ,000             | ,000  | ,000  |
|                                              | 403073202         | ,000             | ,000  | ,000  |
|                                              | 403073203         | ,000             | ,000  | ,000  |
|                                              | 403073204         | ,000             | ,000  | ,000  |
|                                              | 403073303         | ,000             | ,000  | ,000  |
|                                              | 403073651         | ,000             | ,000  | ,000  |
|                                              | 403073771         | ,000             | ,000  | ,000  |
|                                              | 403133102         | ,000             | ,000  | ,000  |
|                                              | 403133106         | ,000             | ,000  | ,000  |
|                                              | 403133107         | ,000             | ,000  | ,000  |
|                                              | 403133109         | ,000             | ,000  | ,000  |
|                                              | 403133202         | ,000             | ,000  | ,000  |
|                                              | 403133203         | ,000             | ,000  | ,000  |
|                                              | 403133204         | 1,000            | ,000  | ,000  |
|                                              | 403133315         | ,000             | 1,000 | ,000  |
|                                              | 403133322         | ,000             | ,000  | 1,000 |
|                                              | 403133401         | ,000             | ,000  | ,000  |
|                                              | 403133402         | ,000             | ,000  | ,000  |
|                                              | 403133550         | ,000             | ,000  | ,000  |
|                                              | 403133772         | ,000             | ,000  | ,000  |
|                                              | 403135803         | ,000             | ,000  | ,000  |
|                                              | 404060001         | ,000             | ,000  | ,000  |
|                                              | 404060002         | ,000             | ,000  | ,000  |
|                                              | 404310003         | ,000             | ,000  | ,000  |
|                                              | 404310004         | ,000             | ,000  | ,000  |
|                                              | 502300005         | ,000             | ,000  | ,000  |
|                                              | 502300006         | ,000             | ,000  | ,000  |
|                                              | 502300007         | ,000             | ,000  | ,000  |
|                                              | 502300214         | ,000             | ,000  | ,000  |
|                                              | 502300411         | ,000             | ,000  | ,000  |
|                                              | 502300415         | ,000             | ,000  | ,000  |
|                                              | 502300416         | ,000             | ,000  | ,000  |
|                                              | 502300811         | ,000             | ,000  | ,000  |
|                                              | 502300913         | ,000             | ,000  | ,000  |
| bv3 belasnting vs paoncil dubbla intervallet | 1 medelbelastning |                  |       |       |
|                                              | 2 underbelastning |                  |       |       |
|                                              | 3 överbelastning  |                  |       |       |

## Categorical Variables Codings

|                                              |                   | Parameter coding |       |       |
|----------------------------------------------|-------------------|------------------|-------|-------|
|                                              |                   | (18)             | (19)  | (20)  |
| VASTY2 (SAIR*10000)+VASTY                    | 403073101         | ,000             | ,000  | ,000  |
|                                              | 403073102         | ,000             | ,000  | ,000  |
|                                              | 403073103         | ,000             | ,000  | ,000  |
|                                              | 403073202         | ,000             | ,000  | ,000  |
|                                              | 403073203         | ,000             | ,000  | ,000  |
|                                              | 403073204         | ,000             | ,000  | ,000  |
|                                              | 403073303         | ,000             | ,000  | ,000  |
|                                              | 403073651         | ,000             | ,000  | ,000  |
|                                              | 403073771         | ,000             | ,000  | ,000  |
|                                              | 403133102         | ,000             | ,000  | ,000  |
|                                              | 403133106         | ,000             | ,000  | ,000  |
|                                              | 403133107         | ,000             | ,000  | ,000  |
|                                              | 403133109         | ,000             | ,000  | ,000  |
|                                              | 403133202         | ,000             | ,000  | ,000  |
|                                              | 403133203         | ,000             | ,000  | ,000  |
|                                              | 403133204         | ,000             | ,000  | ,000  |
|                                              | 403133315         | ,000             | ,000  | ,000  |
|                                              | 403133322         | ,000             | ,000  | ,000  |
|                                              | 403133401         | 1,000            | ,000  | ,000  |
|                                              | 403133402         | ,000             | 1,000 | ,000  |
|                                              | 403133550         | ,000             | ,000  | 1,000 |
|                                              | 403133772         | ,000             | ,000  | ,000  |
|                                              | 403135803         | ,000             | ,000  | ,000  |
|                                              | 404060001         | ,000             | ,000  | ,000  |
|                                              | 404060002         | ,000             | ,000  | ,000  |
|                                              | 404310003         | ,000             | ,000  | ,000  |
|                                              | 404310004         | ,000             | ,000  | ,000  |
|                                              | 502300005         | ,000             | ,000  | ,000  |
|                                              | 502300006         | ,000             | ,000  | ,000  |
|                                              | 502300007         | ,000             | ,000  | ,000  |
|                                              | 502300214         | ,000             | ,000  | ,000  |
|                                              | 502300411         | ,000             | ,000  | ,000  |
|                                              | 502300415         | ,000             | ,000  | ,000  |
|                                              | 502300416         | ,000             | ,000  | ,000  |
|                                              | 502300811         | ,000             | ,000  | ,000  |
|                                              | 502300913         | ,000             | ,000  | ,000  |
| bv3 belasnting vs paoncil dubbla intervallet | 1 medelbelastning |                  |       |       |
|                                              | 2 underbelastning |                  |       |       |
|                                              | 3 överbelastning  |                  |       |       |

## Categorical Variables Codings

|                                              |                   | Parameter coding |       |       |
|----------------------------------------------|-------------------|------------------|-------|-------|
|                                              |                   | (21)             | (22)  | (23)  |
| VASTY2 (SAIR*10000)+VASTY                    | 403073101         | ,000             | ,000  | ,000  |
|                                              | 403073102         | ,000             | ,000  | ,000  |
|                                              | 403073103         | ,000             | ,000  | ,000  |
|                                              | 403073202         | ,000             | ,000  | ,000  |
|                                              | 403073203         | ,000             | ,000  | ,000  |
|                                              | 403073204         | ,000             | ,000  | ,000  |
|                                              | 403073303         | ,000             | ,000  | ,000  |
|                                              | 403073651         | ,000             | ,000  | ,000  |
|                                              | 403073771         | ,000             | ,000  | ,000  |
|                                              | 403133102         | ,000             | ,000  | ,000  |
|                                              | 403133106         | ,000             | ,000  | ,000  |
|                                              | 403133107         | ,000             | ,000  | ,000  |
|                                              | 403133109         | ,000             | ,000  | ,000  |
|                                              | 403133202         | ,000             | ,000  | ,000  |
|                                              | 403133203         | ,000             | ,000  | ,000  |
|                                              | 403133204         | ,000             | ,000  | ,000  |
|                                              | 403133315         | ,000             | ,000  | ,000  |
|                                              | 403133322         | ,000             | ,000  | ,000  |
|                                              | 403133401         | ,000             | ,000  | ,000  |
|                                              | 403133402         | ,000             | ,000  | ,000  |
|                                              | 403133550         | ,000             | ,000  | ,000  |
|                                              | 403133772         | 1,000            | ,000  | ,000  |
|                                              | 403135803         | ,000             | 1,000 | ,000  |
|                                              | 404060001         | ,000             | ,000  | 1,000 |
|                                              | 404060002         | ,000             | ,000  | ,000  |
|                                              | 404310003         | ,000             | ,000  | ,000  |
|                                              | 404310004         | ,000             | ,000  | ,000  |
|                                              | 502300005         | ,000             | ,000  | ,000  |
|                                              | 502300006         | ,000             | ,000  | ,000  |
|                                              | 502300007         | ,000             | ,000  | ,000  |
|                                              | 502300214         | ,000             | ,000  | ,000  |
|                                              | 502300411         | ,000             | ,000  | ,000  |
|                                              | 502300415         | ,000             | ,000  | ,000  |
|                                              | 502300416         | ,000             | ,000  | ,000  |
|                                              | 502300811         | ,000             | ,000  | ,000  |
|                                              | 502300913         | ,000             | ,000  | ,000  |
| bv3 belasnting vs paoncil dubbla intervallet | 1 medelbelastning |                  |       |       |
|                                              | 2 underbelastning |                  |       |       |
|                                              | 3 överbelastning  |                  |       |       |

## Categorical Variables Codings

|                                              |                   | Parameter coding |       |       |
|----------------------------------------------|-------------------|------------------|-------|-------|
|                                              |                   | (24)             | (25)  | (26)  |
| VASTY2 (SAIR*10000)+VASTY                    | 403073101         | ,000             | ,000  | ,000  |
|                                              | 403073102         | ,000             | ,000  | ,000  |
|                                              | 403073103         | ,000             | ,000  | ,000  |
|                                              | 403073202         | ,000             | ,000  | ,000  |
|                                              | 403073203         | ,000             | ,000  | ,000  |
|                                              | 403073204         | ,000             | ,000  | ,000  |
|                                              | 403073303         | ,000             | ,000  | ,000  |
|                                              | 403073651         | ,000             | ,000  | ,000  |
|                                              | 403073771         | ,000             | ,000  | ,000  |
|                                              | 403133102         | ,000             | ,000  | ,000  |
|                                              | 403133106         | ,000             | ,000  | ,000  |
|                                              | 403133107         | ,000             | ,000  | ,000  |
|                                              | 403133109         | ,000             | ,000  | ,000  |
|                                              | 403133202         | ,000             | ,000  | ,000  |
|                                              | 403133203         | ,000             | ,000  | ,000  |
|                                              | 403133204         | ,000             | ,000  | ,000  |
|                                              | 403133315         | ,000             | ,000  | ,000  |
|                                              | 403133322         | ,000             | ,000  | ,000  |
|                                              | 403133401         | ,000             | ,000  | ,000  |
|                                              | 403133402         | ,000             | ,000  | ,000  |
|                                              | 403133550         | ,000             | ,000  | ,000  |
|                                              | 403133772         | ,000             | ,000  | ,000  |
|                                              | 403135803         | ,000             | ,000  | ,000  |
|                                              | 404060001         | ,000             | ,000  | ,000  |
|                                              | 404060002         | 1,000            | ,000  | ,000  |
|                                              | 404310003         | ,000             | 1,000 | ,000  |
|                                              | 404310004         | ,000             | ,000  | 1,000 |
|                                              | 502300005         | ,000             | ,000  | ,000  |
|                                              | 502300006         | ,000             | ,000  | ,000  |
|                                              | 502300007         | ,000             | ,000  | ,000  |
|                                              | 502300214         | ,000             | ,000  | ,000  |
|                                              | 502300411         | ,000             | ,000  | ,000  |
|                                              | 502300415         | ,000             | ,000  | ,000  |
|                                              | 502300416         | ,000             | ,000  | ,000  |
|                                              | 502300811         | ,000             | ,000  | ,000  |
|                                              | 502300913         | ,000             | ,000  | ,000  |
| bv3 belasnting vs paoncil dubbla intervallet | 1 medelbelastning |                  |       |       |
|                                              | 2 underbelastning |                  |       |       |
|                                              | 3 överbelastning  |                  |       |       |

## Categorical Variables Codings

|                                              |                   | Parameter coding |       |       |
|----------------------------------------------|-------------------|------------------|-------|-------|
|                                              |                   | (27)             | (28)  | (29)  |
| VASTY2 (SAIR*10000)+VASTY                    | 403073101         | ,000             | ,000  | ,000  |
|                                              | 403073102         | ,000             | ,000  | ,000  |
|                                              | 403073103         | ,000             | ,000  | ,000  |
|                                              | 403073202         | ,000             | ,000  | ,000  |
|                                              | 403073203         | ,000             | ,000  | ,000  |
|                                              | 403073204         | ,000             | ,000  | ,000  |
|                                              | 403073303         | ,000             | ,000  | ,000  |
|                                              | 403073651         | ,000             | ,000  | ,000  |
|                                              | 403073771         | ,000             | ,000  | ,000  |
|                                              | 403133102         | ,000             | ,000  | ,000  |
|                                              | 403133106         | ,000             | ,000  | ,000  |
|                                              | 403133107         | ,000             | ,000  | ,000  |
|                                              | 403133109         | ,000             | ,000  | ,000  |
|                                              | 403133202         | ,000             | ,000  | ,000  |
|                                              | 403133203         | ,000             | ,000  | ,000  |
|                                              | 403133204         | ,000             | ,000  | ,000  |
|                                              | 403133315         | ,000             | ,000  | ,000  |
|                                              | 403133322         | ,000             | ,000  | ,000  |
|                                              | 403133401         | ,000             | ,000  | ,000  |
|                                              | 403133402         | ,000             | ,000  | ,000  |
|                                              | 403133550         | ,000             | ,000  | ,000  |
|                                              | 403133772         | ,000             | ,000  | ,000  |
|                                              | 403135803         | ,000             | ,000  | ,000  |
|                                              | 404060001         | ,000             | ,000  | ,000  |
|                                              | 404060002         | ,000             | ,000  | ,000  |
|                                              | 404310003         | ,000             | ,000  | ,000  |
|                                              | 404310004         | ,000             | ,000  | ,000  |
|                                              | 502300005         | 1,000            | ,000  | ,000  |
|                                              | 502300006         | ,000             | 1,000 | ,000  |
|                                              | 502300007         | ,000             | ,000  | 1,000 |
|                                              | 502300214         | ,000             | ,000  | ,000  |
|                                              | 502300411         | ,000             | ,000  | ,000  |
|                                              | 502300415         | ,000             | ,000  | ,000  |
|                                              | 502300416         | ,000             | ,000  | ,000  |
|                                              | 502300811         | ,000             | ,000  | ,000  |
|                                              | 502300913         | ,000             | ,000  | ,000  |
| bv3 belasnting vs paoncil dubbla intervallet | 1 medelbelastning |                  |       |       |
|                                              | 2 underbelastning |                  |       |       |
|                                              | 3 överbelastning  |                  |       |       |

## Categorical Variables Codings

|                                              |                   | Parameter coding |       |       |
|----------------------------------------------|-------------------|------------------|-------|-------|
|                                              |                   | (30)             | (31)  | (32)  |
| VASTY2 (SAIR*10000)+VASTY                    | 403073101         | ,000             | ,000  | ,000  |
|                                              | 403073102         | ,000             | ,000  | ,000  |
|                                              | 403073103         | ,000             | ,000  | ,000  |
|                                              | 403073202         | ,000             | ,000  | ,000  |
|                                              | 403073203         | ,000             | ,000  | ,000  |
|                                              | 403073204         | ,000             | ,000  | ,000  |
|                                              | 403073303         | ,000             | ,000  | ,000  |
|                                              | 403073651         | ,000             | ,000  | ,000  |
|                                              | 403073771         | ,000             | ,000  | ,000  |
|                                              | 403133102         | ,000             | ,000  | ,000  |
|                                              | 403133106         | ,000             | ,000  | ,000  |
|                                              | 403133107         | ,000             | ,000  | ,000  |
|                                              | 403133109         | ,000             | ,000  | ,000  |
|                                              | 403133202         | ,000             | ,000  | ,000  |
|                                              | 403133203         | ,000             | ,000  | ,000  |
|                                              | 403133204         | ,000             | ,000  | ,000  |
|                                              | 403133315         | ,000             | ,000  | ,000  |
|                                              | 403133322         | ,000             | ,000  | ,000  |
|                                              | 403133401         | ,000             | ,000  | ,000  |
|                                              | 403133402         | ,000             | ,000  | ,000  |
|                                              | 403133550         | ,000             | ,000  | ,000  |
|                                              | 403133772         | ,000             | ,000  | ,000  |
|                                              | 403135803         | ,000             | ,000  | ,000  |
|                                              | 404060001         | ,000             | ,000  | ,000  |
|                                              | 404060002         | ,000             | ,000  | ,000  |
|                                              | 404310003         | ,000             | ,000  | ,000  |
|                                              | 404310004         | ,000             | ,000  | ,000  |
|                                              | 502300005         | ,000             | ,000  | ,000  |
|                                              | 502300006         | ,000             | ,000  | ,000  |
|                                              | 502300007         | ,000             | ,000  | ,000  |
|                                              | 502300214         | 1,000            | ,000  | ,000  |
|                                              | 502300411         | ,000             | 1,000 | ,000  |
|                                              | 502300415         | ,000             | ,000  | 1,000 |
|                                              | 502300416         | ,000             | ,000  | ,000  |
|                                              | 502300811         | ,000             | ,000  | ,000  |
|                                              | 502300913         | ,000             | ,000  | ,000  |
| bv3 belasnting vs paoncil dubbla intervallet | 1 medelbelastning |                  |       |       |
|                                              | 2 underbelastning |                  |       |       |
|                                              | 3 överbelastning  |                  |       |       |



## Categorical Variables Codings

|                                              |                   | Parameter coding |       |       |
|----------------------------------------------|-------------------|------------------|-------|-------|
|                                              |                   | (33)             | (34)  | (35)  |
| VASTY2 (SAIR*10000)+VASTY                    | 403073101         | ,000             | ,000  | ,000  |
|                                              | 403073102         | ,000             | ,000  | ,000  |
|                                              | 403073103         | ,000             | ,000  | ,000  |
|                                              | 403073202         | ,000             | ,000  | ,000  |
|                                              | 403073203         | ,000             | ,000  | ,000  |
|                                              | 403073204         | ,000             | ,000  | ,000  |
|                                              | 403073303         | ,000             | ,000  | ,000  |
|                                              | 403073651         | ,000             | ,000  | ,000  |
|                                              | 403073771         | ,000             | ,000  | ,000  |
|                                              | 403133102         | ,000             | ,000  | ,000  |
|                                              | 403133106         | ,000             | ,000  | ,000  |
|                                              | 403133107         | ,000             | ,000  | ,000  |
|                                              | 403133109         | ,000             | ,000  | ,000  |
|                                              | 403133202         | ,000             | ,000  | ,000  |
|                                              | 403133203         | ,000             | ,000  | ,000  |
|                                              | 403133204         | ,000             | ,000  | ,000  |
|                                              | 403133315         | ,000             | ,000  | ,000  |
|                                              | 403133322         | ,000             | ,000  | ,000  |
|                                              | 403133401         | ,000             | ,000  | ,000  |
|                                              | 403133402         | ,000             | ,000  | ,000  |
|                                              | 403133550         | ,000             | ,000  | ,000  |
|                                              | 403133772         | ,000             | ,000  | ,000  |
|                                              | 403135803         | ,000             | ,000  | ,000  |
|                                              | 404060001         | ,000             | ,000  | ,000  |
|                                              | 404060002         | ,000             | ,000  | ,000  |
|                                              | 404310003         | ,000             | ,000  | ,000  |
|                                              | 404310004         | ,000             | ,000  | ,000  |
|                                              | 502300005         | ,000             | ,000  | ,000  |
|                                              | 502300006         | ,000             | ,000  | ,000  |
|                                              | 502300007         | ,000             | ,000  | ,000  |
|                                              | 502300214         | ,000             | ,000  | ,000  |
|                                              | 502300411         | ,000             | ,000  | ,000  |
|                                              | 502300415         | ,000             | ,000  | ,000  |
|                                              | 502300416         | 1,000            | ,000  | ,000  |
|                                              | 502300811         | ,000             | 1,000 | ,000  |
|                                              | 502300913         | ,000             | ,000  | 1,000 |
| bv3 belasnting vs paoncil dubbla intervallet | 1 medelbelastning |                  |       |       |
|                                              | 2 underbelastning |                  |       |       |
|                                              | 3 överbelastning  |                  |       |       |

**Block 0: Beginning Block**

Classification Table<sup>a,b</sup>

| Observed           |                             |                      | Predicted                   |                      |
|--------------------|-----------------------------|----------------------|-----------------------------|----------------------|
|                    |                             |                      | dod01 dödsfall ja eller nej |                      |
|                    |                             |                      | 0 inget dödsfall            | 1 minst ett dödsfall |
| Step 0             | dod01 dödsfall ja eller nej | 0 inget dödsfall     | 11839                       | 0                    |
|                    |                             | 1 minst ett dödsfall | 636                         | 0                    |
| Overall Percentage |                             |                      |                             |                      |

Classification Table<sup>a,b</sup>

| Observed           |                             |                      | Predicted          |
|--------------------|-----------------------------|----------------------|--------------------|
|                    |                             |                      | Percentage Correct |
| Step 0             | dod01 dödsfall ja eller nej | 0 inget dödsfall     | 100,0              |
|                    |                             | 1 minst ett dödsfall | ,0                 |
| Overall Percentage |                             |                      | 94,9               |

a. Constant is included in the model.

b. The cut value is ,500

Variables in the Equation

|                 | B      | S.E. | Wald     | df | Sig. | Exp(B) |
|-----------------|--------|------|----------|----|------|--------|
| Step 0 Constant | -2,924 | ,041 | 5160,279 | 1  | ,000 | ,054   |

## Variables not in the Equation

|        |                    | Score   | df | Sig. |
|--------|--------------------|---------|----|------|
| Step 0 | Variables          |         |    |      |
|        | bv3                | 50,436  | 2  | ,000 |
|        | bv3(1)             | 34,100  | 1  | ,000 |
|        | bv3(2)             | 23,966  | 1  | ,000 |
|        | VASTY2             | 635,545 | 35 | ,000 |
|        | VASTY2(1)          | 2,519   | 1  | ,113 |
|        | VASTY2(2)          | 6,299   | 1  | ,012 |
|        | VASTY2(3)          | 8,957   | 1  | ,003 |
|        | VASTY2(4)          | ,151    | 1  | ,698 |
|        | VASTY2(5)          | 7,537   | 1  | ,006 |
|        | VASTY2(6)          | 20,142  | 1  | ,000 |
|        | VASTY2(7)          | 127,387 | 1  | ,000 |
|        | VASTY2(8)          | 8,957   | 1  | ,003 |
|        | VASTY2(9)          | ,163    | 1  | ,687 |
|        | VASTY2(10)         | 7,570   | 1  | ,006 |
|        | VASTY2(11)         | ,113    | 1  | ,737 |
|        | VASTY2(12)         | 47,021  | 1  | ,000 |
|        | VASTY2(13)         | 90,515  | 1  | ,000 |
|        | VASTY2(14)         | 7,570   | 1  | ,006 |
|        | VASTY2(15)         | ,151    | 1  | ,698 |
|        | VASTY2(16)         | 4,298   | 1  | ,038 |
|        | VASTY2(17)         | 20,199  | 1  | ,000 |
|        | VASTY2(18)         | 17,916  | 1  | ,000 |
|        | VASTY2(19)         | 18,086  | 1  | ,000 |
|        | VASTY2(20)         | 10,563  | 1  | ,001 |
|        | VASTY2(21)         | 1,696   | 1  | ,193 |
|        | VASTY2(22)         | 26,693  | 1  | ,000 |
|        | VASTY2(23)         | 1,125   | 1  | ,289 |
|        | VASTY2(24)         | 72,662  | 1  | ,000 |
|        | VASTY2(25)         | 2,477   | 1  | ,116 |
|        | VASTY2(26)         | 16,006  | 1  | ,000 |
|        | VASTY2(27)         | 20,256  | 1  | ,000 |
|        | VASTY2(28)         | 12,309  | 1  | ,000 |
|        | VASTY2(29)         | 20,256  | 1  | ,000 |
|        | VASTY2(30)         | 1,263   | 1  | ,261 |
|        | VASTY2(31)         | 20,256  | 1  | ,000 |
|        | VASTY2(32)         | 15,810  | 1  | ,000 |
|        | VASTY2(33)         | 17,973  | 1  | ,000 |
|        | VASTY2(34)         | ,693    | 1  | ,405 |
|        | VASTY2(35)         | 17,360  | 1  | ,000 |
|        | Overall Statistics | 648,501 | 37 | ,000 |

**Block 1: Method = Enter**

## Omnibus Tests of Model Coefficients

|        |       | Chi-square | df | Sig. |
|--------|-------|------------|----|------|
| Step 1 | Step  | 717,578    | 37 | ,000 |
|        | Block | 717,578    | 37 | ,000 |
|        | Model | 717,578    | 37 | ,000 |

## Model Summary

| Step | -2 Log likelihood     | Cox & Snell R Square | Nagelkerke R Square |
|------|-----------------------|----------------------|---------------------|
| 1    | 4307,265 <sup>a</sup> | ,056                 | ,169                |

a. Estimation terminated at iteration number 20 because maximum iterations has been reached. Final solution cannot be found.

Classification Table<sup>a</sup>

| Observed           |                             | Predicted                   |                      |   |
|--------------------|-----------------------------|-----------------------------|----------------------|---|
|                    |                             | dod01 dödsfall ja eller nej |                      |   |
|                    |                             | 0 inget dödsfall            | 1 minst ett dödsfall |   |
| Step 1             | dod01 dödsfall ja eller nej | 0 inget dödsfall            | 11839                | 0 |
|                    |                             | 1 minst ett dödsfall        | 636                  | 0 |
| Overall Percentage |                             |                             |                      |   |

Classification Table<sup>a</sup>

| Observed           |                             | Predicted          |
|--------------------|-----------------------------|--------------------|
|                    |                             | Percentage Correct |
| Step 1             | dod01 dödsfall ja eller nej | 100,0              |
|                    |                             | ,0                 |
| Overall Percentage |                             | 94,9               |

a. The cut value is ,500

## Variables in the Equation

|                         | B       | S.E.     | Wald    | df | Sig. | Exp(B) |
|-------------------------|---------|----------|---------|----|------|--------|
| Step 1 <sup>a</sup> bv3 |         |          | 15,036  | 2  | ,001 |        |
| bv3(1)                  | -,380   | ,199     | 3,646   | 1  | ,056 | ,684   |
| bv3(2)                  | ,373    | ,116     | 10,375  | 1  | ,001 | 1,452  |
| VASTY2                  |         |          | 212,822 | 35 | ,000 |        |
| VASTY2(1)               | ,641    | ,343     | 3,494   | 1  | ,062 | 1,898  |
| VASTY2(2)               | ,753    | ,334     | 5,064   | 1  | ,024 | 2,122  |
| VASTY2(3)               | ,680    | ,335     | 4,128   | 1  | ,042 | 1,973  |
| VASTY2(4)               | ,064    | ,371     | ,030    | 1  | ,862 | 1,066  |
| VASTY2(5)               | -,816   | ,494     | 2,724   | 1  | ,099 | ,442   |
| VASTY2(6)               | -18,094 | 2101,047 | ,000    | 1  | ,993 | ,000   |
| VASTY2(7)               | 1,475   | ,313     | 22,211  | 1  | ,000 | 4,369  |
| VASTY2(8)               | ,790    | ,331     | 5,680   | 1  | ,017 | 2,203  |
| VASTY2(9)               | ,321    | ,361     | ,788    | 1  | ,375 | 1,378  |
| VASTY2(10)              | ,769    | ,333     | 5,331   | 1  | ,021 | 2,157  |
| VASTY2(11)              | ,350    | ,357     | ,959    | 1  | ,327 | 1,419  |
| VASTY2(12)              | 1,275   | ,314     | 16,435  | 1  | ,000 | 3,577  |
| VASTY2(13)              | 1,457   | ,309     | 22,198  | 1  | ,000 | 4,291  |
| VASTY2(14)              | ,747    | ,333     | 5,019   | 1  | ,025 | 2,110  |
| VASTY2(15)              | ,167    | ,369     | ,206    | 1  | ,650 | 1,182  |
| VASTY2(16)              | -,915   | ,645     | 2,017   | 1  | ,156 | ,400   |
| VASTY2(17)              | -17,981 | 2099,926 | ,000    | 1  | ,993 | ,000   |
| VASTY2(18)              | -2,700  | 1,038    | 6,765   | 1  | ,009 | ,067   |
| VASTY2(19)              | -2,448  | 1,044    | 5,504   | 1  | ,019 | ,086   |
| VASTY2(20)              | -1,470  | ,642     | 5,239   | 1  | ,022 | ,230   |
| VASTY2(21)              | ,534    | ,345     | 2,399   | 1  | ,121 | 1,707  |
| VASTY2(22)              | 1,173   | ,321     | 13,390  | 1  | ,000 | 3,232  |
| VASTY2(23)              | ,542    | ,348     | 2,429   | 1  | ,119 | 1,719  |
| VASTY2(24)              | 1,339   | ,312     | 18,387  | 1  | ,000 | 3,814  |
| VASTY2(25)              | -,201   | ,435     | ,214    | 1  | ,644 | ,818   |
| VASTY2(26)              | -18,030 | 2351,071 | ,000    | 1  | ,994 | ,000   |
| VASTY2(27)              | -18,052 | 2095,802 | ,000    | 1  | ,993 | ,000   |
| VASTY2(28)              | -18,045 | 2677,010 | ,000    | 1  | ,995 | ,000   |
| VASTY2(29)              | -18,030 | 2099,078 | ,000    | 1  | ,993 | ,000   |
| VASTY2(30)              | -,063   | ,386     | ,027    | 1  | ,871 | ,939   |
| VASTY2(31)              | -18,004 | 2092,378 | ,000    | 1  | ,993 | ,000   |
| VASTY2(32)              | -1,931  | ,761     | 6,434   | 1  | ,011 | ,145   |
| VASTY2(33)              | -2,636  | 1,039    | 6,441   | 1  | ,011 | ,072   |
| VASTY2(34)              | ,454    | ,350     | 1,681   | 1  | ,195 | 1,575  |
| VASTY2(35)              | -18,134 | 2257,580 | ,000    | 1  | ,994 | ,000   |
| Constant                | -3,202  | ,273     | 137,651 | 1  | ,000 | ,041   |

## Variables in the Equation

|                     |            | 95% C.I. for EXP(B) |       |
|---------------------|------------|---------------------|-------|
|                     |            | Lower               | Upper |
| Step 1 <sup>a</sup> | bv3        |                     |       |
|                     | bv3(1)     | ,463                | 1,010 |
|                     | bv3(2)     | 1,157               | 1,822 |
|                     | VASTY2     |                     |       |
|                     | VASTY2(1)  | ,969                | 3,716 |
|                     | VASTY2(2)  | 1,102               | 4,088 |
|                     | VASTY2(3)  | 1,024               | 3,802 |
|                     | VASTY2(4)  | ,515                | 2,208 |
|                     | VASTY2(5)  | ,168                | 1,165 |
|                     | VASTY2(6)  | ,000                | .     |
|                     | VASTY2(7)  | 2,366               | 8,068 |
|                     | VASTY2(8)  | 1,151               | 4,219 |
|                     | VASTY2(9)  | ,679                | 2,799 |
|                     | VASTY2(10) | 1,123               | 4,141 |
|                     | VASTY2(11) | ,705                | 2,856 |
|                     | VASTY2(12) | 1,932               | 6,625 |
|                     | VASTY2(13) | 2,341               | 7,866 |
|                     | VASTY2(14) | 1,098               | 4,056 |
|                     | VASTY2(15) | ,574                | 2,437 |
|                     | VASTY2(16) | ,113                | 1,416 |
|                     | VASTY2(17) | ,000                | .     |
|                     | VASTY2(18) | ,009                | ,514  |
|                     | VASTY2(19) | ,011                | ,668  |
|                     | VASTY2(20) | ,065                | ,810  |
|                     | VASTY2(21) | ,868                | 3,356 |
|                     | VASTY2(22) | 1,724               | 6,059 |
|                     | VASTY2(23) | ,870                | 3,399 |
|                     | VASTY2(24) | 2,068               | 7,033 |
|                     | VASTY2(25) | ,349                | 1,918 |
|                     | VASTY2(26) | ,000                | .     |
|                     | VASTY2(27) | ,000                | .     |
|                     | VASTY2(28) | ,000                | .     |
|                     | VASTY2(29) | ,000                | .     |
|                     | VASTY2(30) | ,441                | 2,001 |
|                     | VASTY2(31) | ,000                | .     |
|                     | VASTY2(32) | ,033                | ,645  |
|                     | VASTY2(33) | ,009                | ,549  |
|                     | VASTY2(34) | ,793                | 3,130 |
|                     | VASTY2(35) | ,000                | .     |
|                     | Constant   |                     |       |

a. Variable(s) entered on step 1: bv3, VASTY2.

```

1
2
3 LOGISTIC REGRESSION VARIABLES dod01
4   /METHOD=ENTER sv3 VASTY2
5   /CONTRAST (sv3)=Indicator(1)
6   /CONTRAST (VASTY2)=Indicator(1)
7   /PRINT=CI(95)
8   /CRITERIA=PIN(0.05) POUT(0.10) ITERATE(20) CUT(0.5).
9
10
11

```

## Logistic Regression

[DataSet6] C:\cWordjan\Rafaela\_VCS\alla\_tillsammans\abo\_bjo\_vasa\_v1.sav

### Case Processing Summary

| Unweighted Cases <sup>a</sup> |                      | N     | Percent |
|-------------------------------|----------------------|-------|---------|
| Selected Cases                | Included in Analysis | 12475 | 100,0   |
|                               | Missing Cases        | 0     | ,0      |
|                               | Total                | 12475 | 100,0   |
| Unselected Cases              |                      | 0     | ,0      |
| Total                         |                      | 12475 | 100,0   |

a. If weight is in effect, see classification table for the total number of cases.

### Dependent Variable Encoding

| Original Value       | Internal Value |
|----------------------|----------------|
| 0 inget dödsfall     | 0              |
| 1 minst ett dödsfall | 1              |

## Categorical Variables Codings

|                                                  | Frequency | Parameter coding |       |       |
|--------------------------------------------------|-----------|------------------|-------|-------|
|                                                  |           | (1)              | (2)   | (3)   |
| VASTY2 (SAIR*10000)+VASTY 403073101              | 365       | ,000             | ,000  | ,000  |
| 403073102                                        | 362       | 1,000            | ,000  | ,000  |
| 403073103                                        | 365       | ,000             | 1,000 | ,000  |
| 403073202                                        | 365       | ,000             | ,000  | 1,000 |
| 403073203                                        | 365       | ,000             | ,000  | ,000  |
| 403073204                                        | 330       | ,000             | ,000  | ,000  |
| 403073303                                        | 364       | ,000             | ,000  | ,000  |
| 403073651                                        | 362       | ,000             | ,000  | ,000  |
| 403073771                                        | 365       | ,000             | ,000  | ,000  |
| 403133102                                        | 341       | ,000             | ,000  | ,000  |
| 403133106                                        | 365       | ,000             | ,000  | ,000  |
| 403133107                                        | 365       | ,000             | ,000  | ,000  |
| 403133109                                        | 365       | ,000             | ,000  | ,000  |
| 403133202                                        | 365       | ,000             | ,000  | ,000  |
| 403133203                                        | 365       | ,000             | ,000  | ,000  |
| 403133204                                        | 365       | ,000             | ,000  | ,000  |
| 403133315                                        | 177       | ,000             | ,000  | ,000  |
| 403133322                                        | 365       | ,000             | ,000  | ,000  |
| 403133401                                        | 362       | ,000             | ,000  | ,000  |
| 403133402                                        | 365       | ,000             | ,000  | ,000  |
| 403133550                                        | 298       | ,000             | ,000  | ,000  |
| 403133772                                        | 365       | ,000             | ,000  | ,000  |
| 403135803                                        | 365       | ,000             | ,000  | ,000  |
| 404060001                                        | 365       | ,000             | ,000  | ,000  |
| 404060002                                        | 366       | ,000             | ,000  | ,000  |
| 404310003                                        | 291       | ,000             | ,000  | ,000  |
| 404310004                                        | 291       | ,000             | ,000  | ,000  |
| 502300005                                        | 366       | ,000             | ,000  | ,000  |
| 502300006                                        | 225       | ,000             | ,000  | ,000  |
| 502300007                                        | 366       | ,000             | ,000  | ,000  |
| 502300214                                        | 366       | ,000             | ,000  | ,000  |
| 502300411                                        | 366       | ,000             | ,000  | ,000  |
| 502300415                                        | 360       | ,000             | ,000  | ,000  |
| 502300416                                        | 363       | ,000             | ,000  | ,000  |
| 502300811                                        | 364       | ,000             | ,000  | ,000  |
| 502300913                                        | 315       | ,000             | ,000  | ,000  |
| sv3 tredjedelar för standard 1 andra tredjedelen | 3172      | ,000             | ,000  |       |
| 2 första tredjedelen                             | 4718      | 1,000            | ,000  |       |
| 3 tredje tredjedelen                             | 4585      | ,000             | 1,000 |       |



## Categorical Variables Codings

|                              |                      | Parameter coding |       |       |       |
|------------------------------|----------------------|------------------|-------|-------|-------|
|                              |                      | (4)              | (5)   | (6)   | (7)   |
| VASTY2 (SAIR*10000)+VASTY    | 403073101            | ,000             | ,000  | ,000  | ,000  |
|                              | 403073102            | ,000             | ,000  | ,000  | ,000  |
|                              | 403073103            | ,000             | ,000  | ,000  | ,000  |
|                              | 403073202            | ,000             | ,000  | ,000  | ,000  |
|                              | 403073203            | 1,000            | ,000  | ,000  | ,000  |
|                              | 403073204            | ,000             | 1,000 | ,000  | ,000  |
|                              | 403073303            | ,000             | ,000  | 1,000 | ,000  |
|                              | 403073651            | ,000             | ,000  | ,000  | 1,000 |
|                              | 403073771            | ,000             | ,000  | ,000  | ,000  |
|                              | 403133102            | ,000             | ,000  | ,000  | ,000  |
|                              | 403133106            | ,000             | ,000  | ,000  | ,000  |
|                              | 403133107            | ,000             | ,000  | ,000  | ,000  |
|                              | 403133109            | ,000             | ,000  | ,000  | ,000  |
|                              | 403133202            | ,000             | ,000  | ,000  | ,000  |
|                              | 403133203            | ,000             | ,000  | ,000  | ,000  |
|                              | 403133204            | ,000             | ,000  | ,000  | ,000  |
|                              | 403133315            | ,000             | ,000  | ,000  | ,000  |
|                              | 403133322            | ,000             | ,000  | ,000  | ,000  |
|                              | 403133401            | ,000             | ,000  | ,000  | ,000  |
|                              | 403133402            | ,000             | ,000  | ,000  | ,000  |
|                              | 403133550            | ,000             | ,000  | ,000  | ,000  |
|                              | 403133772            | ,000             | ,000  | ,000  | ,000  |
|                              | 403135803            | ,000             | ,000  | ,000  | ,000  |
|                              | 404060001            | ,000             | ,000  | ,000  | ,000  |
|                              | 404060002            | ,000             | ,000  | ,000  | ,000  |
|                              | 404310003            | ,000             | ,000  | ,000  | ,000  |
|                              | 404310004            | ,000             | ,000  | ,000  | ,000  |
|                              | 502300005            | ,000             | ,000  | ,000  | ,000  |
|                              | 502300006            | ,000             | ,000  | ,000  | ,000  |
|                              | 502300007            | ,000             | ,000  | ,000  | ,000  |
|                              | 502300214            | ,000             | ,000  | ,000  | ,000  |
|                              | 502300411            | ,000             | ,000  | ,000  | ,000  |
|                              | 502300415            | ,000             | ,000  | ,000  | ,000  |
|                              | 502300416            | ,000             | ,000  | ,000  | ,000  |
|                              | 502300811            | ,000             | ,000  | ,000  | ,000  |
|                              | 502300913            | ,000             | ,000  | ,000  | ,000  |
| sv3 tredjedelar för standard | 1 andra tredjedelen  |                  |       |       |       |
|                              | 2 första tredjedelen |                  |       |       |       |
|                              | 3 tredje tredjedelen |                  |       |       |       |

## Categorical Variables Codings

|                              |                      | Parameter coding |       |       |       |
|------------------------------|----------------------|------------------|-------|-------|-------|
|                              |                      | (8)              | (9)   | (10)  | (11)  |
| VASTY2 (SAIR*10000)+VASTY    | 403073101            | ,000             | ,000  | ,000  | ,000  |
|                              | 403073102            | ,000             | ,000  | ,000  | ,000  |
|                              | 403073103            | ,000             | ,000  | ,000  | ,000  |
|                              | 403073202            | ,000             | ,000  | ,000  | ,000  |
|                              | 403073203            | ,000             | ,000  | ,000  | ,000  |
|                              | 403073204            | ,000             | ,000  | ,000  | ,000  |
|                              | 403073303            | ,000             | ,000  | ,000  | ,000  |
|                              | 403073651            | ,000             | ,000  | ,000  | ,000  |
|                              | 403073771            | 1,000            | ,000  | ,000  | ,000  |
|                              | 403133102            | ,000             | 1,000 | ,000  | ,000  |
|                              | 403133106            | ,000             | ,000  | 1,000 | ,000  |
|                              | 403133107            | ,000             | ,000  | ,000  | 1,000 |
|                              | 403133109            | ,000             | ,000  | ,000  | ,000  |
|                              | 403133202            | ,000             | ,000  | ,000  | ,000  |
|                              | 403133203            | ,000             | ,000  | ,000  | ,000  |
|                              | 403133204            | ,000             | ,000  | ,000  | ,000  |
|                              | 403133315            | ,000             | ,000  | ,000  | ,000  |
|                              | 403133322            | ,000             | ,000  | ,000  | ,000  |
|                              | 403133401            | ,000             | ,000  | ,000  | ,000  |
|                              | 403133402            | ,000             | ,000  | ,000  | ,000  |
|                              | 403133550            | ,000             | ,000  | ,000  | ,000  |
|                              | 403133772            | ,000             | ,000  | ,000  | ,000  |
|                              | 403135803            | ,000             | ,000  | ,000  | ,000  |
|                              | 404060001            | ,000             | ,000  | ,000  | ,000  |
|                              | 404060002            | ,000             | ,000  | ,000  | ,000  |
|                              | 404310003            | ,000             | ,000  | ,000  | ,000  |
|                              | 404310004            | ,000             | ,000  | ,000  | ,000  |
|                              | 502300005            | ,000             | ,000  | ,000  | ,000  |
|                              | 502300006            | ,000             | ,000  | ,000  | ,000  |
|                              | 502300007            | ,000             | ,000  | ,000  | ,000  |
|                              | 502300214            | ,000             | ,000  | ,000  | ,000  |
|                              | 502300411            | ,000             | ,000  | ,000  | ,000  |
|                              | 502300415            | ,000             | ,000  | ,000  | ,000  |
|                              | 502300416            | ,000             | ,000  | ,000  | ,000  |
|                              | 502300811            | ,000             | ,000  | ,000  | ,000  |
|                              | 502300913            | ,000             | ,000  | ,000  | ,000  |
| sv3 tredjedelar för standard | 1 andra tredjedelen  |                  |       |       |       |
|                              | 2 första tredjedelen |                  |       |       |       |
|                              | 3 tredje tredjedelen |                  |       |       |       |

## Categorical Variables Codings

|                              |                      | Parameter coding |       |       |       |
|------------------------------|----------------------|------------------|-------|-------|-------|
|                              |                      | (12)             | (13)  | (14)  | (15)  |
| VASTY2 (SAIR*10000)+VASTY    | 403073101            | ,000             | ,000  | ,000  | ,000  |
|                              | 403073102            | ,000             | ,000  | ,000  | ,000  |
|                              | 403073103            | ,000             | ,000  | ,000  | ,000  |
|                              | 403073202            | ,000             | ,000  | ,000  | ,000  |
|                              | 403073203            | ,000             | ,000  | ,000  | ,000  |
|                              | 403073204            | ,000             | ,000  | ,000  | ,000  |
|                              | 403073303            | ,000             | ,000  | ,000  | ,000  |
|                              | 403073651            | ,000             | ,000  | ,000  | ,000  |
|                              | 403073771            | ,000             | ,000  | ,000  | ,000  |
|                              | 403133102            | ,000             | ,000  | ,000  | ,000  |
|                              | 403133106            | ,000             | ,000  | ,000  | ,000  |
|                              | 403133107            | ,000             | ,000  | ,000  | ,000  |
|                              | 403133109            | 1,000            | ,000  | ,000  | ,000  |
|                              | 403133202            | ,000             | 1,000 | ,000  | ,000  |
|                              | 403133203            | ,000             | ,000  | 1,000 | ,000  |
|                              | 403133204            | ,000             | ,000  | ,000  | 1,000 |
|                              | 403133315            | ,000             | ,000  | ,000  | ,000  |
|                              | 403133322            | ,000             | ,000  | ,000  | ,000  |
|                              | 403133401            | ,000             | ,000  | ,000  | ,000  |
|                              | 403133402            | ,000             | ,000  | ,000  | ,000  |
|                              | 403133550            | ,000             | ,000  | ,000  | ,000  |
|                              | 403133772            | ,000             | ,000  | ,000  | ,000  |
|                              | 403135803            | ,000             | ,000  | ,000  | ,000  |
|                              | 404060001            | ,000             | ,000  | ,000  | ,000  |
|                              | 404060002            | ,000             | ,000  | ,000  | ,000  |
|                              | 404310003            | ,000             | ,000  | ,000  | ,000  |
|                              | 404310004            | ,000             | ,000  | ,000  | ,000  |
|                              | 502300005            | ,000             | ,000  | ,000  | ,000  |
|                              | 502300006            | ,000             | ,000  | ,000  | ,000  |
|                              | 502300007            | ,000             | ,000  | ,000  | ,000  |
|                              | 502300214            | ,000             | ,000  | ,000  | ,000  |
|                              | 502300411            | ,000             | ,000  | ,000  | ,000  |
|                              | 502300415            | ,000             | ,000  | ,000  | ,000  |
|                              | 502300416            | ,000             | ,000  | ,000  | ,000  |
|                              | 502300811            | ,000             | ,000  | ,000  | ,000  |
|                              | 502300913            | ,000             | ,000  | ,000  | ,000  |
| sv3 tredjedelar för standard | 1 andra tredjedelen  |                  |       |       |       |
|                              | 2 första tredjedelen |                  |       |       |       |
|                              | 3 tredje tredjedelen |                  |       |       |       |

## Categorical Variables Codings

|                              |                      | Parameter coding |       |       |       |
|------------------------------|----------------------|------------------|-------|-------|-------|
|                              |                      | (16)             | (17)  | (18)  | (19)  |
| VASTY2 (SAIR*10000)+VASTY    | 403073101            | ,000             | ,000  | ,000  | ,000  |
|                              | 403073102            | ,000             | ,000  | ,000  | ,000  |
|                              | 403073103            | ,000             | ,000  | ,000  | ,000  |
|                              | 403073202            | ,000             | ,000  | ,000  | ,000  |
|                              | 403073203            | ,000             | ,000  | ,000  | ,000  |
|                              | 403073204            | ,000             | ,000  | ,000  | ,000  |
|                              | 403073303            | ,000             | ,000  | ,000  | ,000  |
|                              | 403073651            | ,000             | ,000  | ,000  | ,000  |
|                              | 403073771            | ,000             | ,000  | ,000  | ,000  |
|                              | 403133102            | ,000             | ,000  | ,000  | ,000  |
|                              | 403133106            | ,000             | ,000  | ,000  | ,000  |
|                              | 403133107            | ,000             | ,000  | ,000  | ,000  |
|                              | 403133109            | ,000             | ,000  | ,000  | ,000  |
|                              | 403133202            | ,000             | ,000  | ,000  | ,000  |
|                              | 403133203            | ,000             | ,000  | ,000  | ,000  |
|                              | 403133204            | ,000             | ,000  | ,000  | ,000  |
|                              | 403133315            | 1,000            | ,000  | ,000  | ,000  |
|                              | 403133322            | ,000             | 1,000 | ,000  | ,000  |
|                              | 403133401            | ,000             | ,000  | 1,000 | ,000  |
|                              | 403133402            | ,000             | ,000  | ,000  | 1,000 |
|                              | 403133550            | ,000             | ,000  | ,000  | ,000  |
|                              | 403133772            | ,000             | ,000  | ,000  | ,000  |
|                              | 403135803            | ,000             | ,000  | ,000  | ,000  |
|                              | 404060001            | ,000             | ,000  | ,000  | ,000  |
|                              | 404060002            | ,000             | ,000  | ,000  | ,000  |
|                              | 404310003            | ,000             | ,000  | ,000  | ,000  |
|                              | 404310004            | ,000             | ,000  | ,000  | ,000  |
|                              | 502300005            | ,000             | ,000  | ,000  | ,000  |
|                              | 502300006            | ,000             | ,000  | ,000  | ,000  |
|                              | 502300007            | ,000             | ,000  | ,000  | ,000  |
|                              | 502300214            | ,000             | ,000  | ,000  | ,000  |
|                              | 502300411            | ,000             | ,000  | ,000  | ,000  |
|                              | 502300415            | ,000             | ,000  | ,000  | ,000  |
|                              | 502300416            | ,000             | ,000  | ,000  | ,000  |
|                              | 502300811            | ,000             | ,000  | ,000  | ,000  |
|                              | 502300913            | ,000             | ,000  | ,000  | ,000  |
| sv3 tredjedelar för standard | 1 andra tredjedelen  |                  |       |       |       |
|                              | 2 första tredjedelen |                  |       |       |       |
|                              | 3 tredje tredjedelen |                  |       |       |       |

## Categorical Variables Codings

|                              |                      | Parameter coding |       |       |       |
|------------------------------|----------------------|------------------|-------|-------|-------|
|                              |                      | (20)             | (21)  | (22)  | (23)  |
| VASTY2 (SAIR*10000)+VASTY    | 403073101            | ,000             | ,000  | ,000  | ,000  |
|                              | 403073102            | ,000             | ,000  | ,000  | ,000  |
|                              | 403073103            | ,000             | ,000  | ,000  | ,000  |
|                              | 403073202            | ,000             | ,000  | ,000  | ,000  |
|                              | 403073203            | ,000             | ,000  | ,000  | ,000  |
|                              | 403073204            | ,000             | ,000  | ,000  | ,000  |
|                              | 403073303            | ,000             | ,000  | ,000  | ,000  |
|                              | 403073651            | ,000             | ,000  | ,000  | ,000  |
|                              | 403073771            | ,000             | ,000  | ,000  | ,000  |
|                              | 403133102            | ,000             | ,000  | ,000  | ,000  |
|                              | 403133106            | ,000             | ,000  | ,000  | ,000  |
|                              | 403133107            | ,000             | ,000  | ,000  | ,000  |
|                              | 403133109            | ,000             | ,000  | ,000  | ,000  |
|                              | 403133202            | ,000             | ,000  | ,000  | ,000  |
|                              | 403133203            | ,000             | ,000  | ,000  | ,000  |
|                              | 403133204            | ,000             | ,000  | ,000  | ,000  |
|                              | 403133315            | ,000             | ,000  | ,000  | ,000  |
|                              | 403133322            | ,000             | ,000  | ,000  | ,000  |
|                              | 403133401            | ,000             | ,000  | ,000  | ,000  |
|                              | 403133402            | ,000             | ,000  | ,000  | ,000  |
|                              | 403133550            | 1,000            | ,000  | ,000  | ,000  |
|                              | 403133772            | ,000             | 1,000 | ,000  | ,000  |
|                              | 403135803            | ,000             | ,000  | 1,000 | ,000  |
|                              | 404060001            | ,000             | ,000  | ,000  | 1,000 |
|                              | 404060002            | ,000             | ,000  | ,000  | ,000  |
|                              | 404310003            | ,000             | ,000  | ,000  | ,000  |
|                              | 404310004            | ,000             | ,000  | ,000  | ,000  |
|                              | 502300005            | ,000             | ,000  | ,000  | ,000  |
|                              | 502300006            | ,000             | ,000  | ,000  | ,000  |
|                              | 502300007            | ,000             | ,000  | ,000  | ,000  |
|                              | 502300214            | ,000             | ,000  | ,000  | ,000  |
|                              | 502300411            | ,000             | ,000  | ,000  | ,000  |
|                              | 502300415            | ,000             | ,000  | ,000  | ,000  |
|                              | 502300416            | ,000             | ,000  | ,000  | ,000  |
|                              | 502300811            | ,000             | ,000  | ,000  | ,000  |
|                              | 502300913            | ,000             | ,000  | ,000  | ,000  |
| sv3 tredjedelar för standard | 1 andra tredjedelen  |                  |       |       |       |
|                              | 2 första tredjedelen |                  |       |       |       |
|                              | 3 tredje tredjedelen |                  |       |       |       |

## Categorical Variables Codings

|                              |                      | Parameter coding |       |       |       |
|------------------------------|----------------------|------------------|-------|-------|-------|
|                              |                      | (24)             | (25)  | (26)  | (27)  |
| VASTY2 (SAIR*10000)+VASTY    | 403073101            | ,000             | ,000  | ,000  | ,000  |
|                              | 403073102            | ,000             | ,000  | ,000  | ,000  |
|                              | 403073103            | ,000             | ,000  | ,000  | ,000  |
|                              | 403073202            | ,000             | ,000  | ,000  | ,000  |
|                              | 403073203            | ,000             | ,000  | ,000  | ,000  |
|                              | 403073204            | ,000             | ,000  | ,000  | ,000  |
|                              | 403073303            | ,000             | ,000  | ,000  | ,000  |
|                              | 403073651            | ,000             | ,000  | ,000  | ,000  |
|                              | 403073771            | ,000             | ,000  | ,000  | ,000  |
|                              | 403133102            | ,000             | ,000  | ,000  | ,000  |
|                              | 403133106            | ,000             | ,000  | ,000  | ,000  |
|                              | 403133107            | ,000             | ,000  | ,000  | ,000  |
|                              | 403133109            | ,000             | ,000  | ,000  | ,000  |
|                              | 403133202            | ,000             | ,000  | ,000  | ,000  |
|                              | 403133203            | ,000             | ,000  | ,000  | ,000  |
|                              | 403133204            | ,000             | ,000  | ,000  | ,000  |
|                              | 403133315            | ,000             | ,000  | ,000  | ,000  |
|                              | 403133322            | ,000             | ,000  | ,000  | ,000  |
|                              | 403133401            | ,000             | ,000  | ,000  | ,000  |
|                              | 403133402            | ,000             | ,000  | ,000  | ,000  |
|                              | 403133550            | ,000             | ,000  | ,000  | ,000  |
|                              | 403133772            | ,000             | ,000  | ,000  | ,000  |
|                              | 403135803            | ,000             | ,000  | ,000  | ,000  |
|                              | 404060001            | ,000             | ,000  | ,000  | ,000  |
|                              | 404060002            | 1,000            | ,000  | ,000  | ,000  |
|                              | 404310003            | ,000             | 1,000 | ,000  | ,000  |
|                              | 404310004            | ,000             | ,000  | 1,000 | ,000  |
|                              | 502300005            | ,000             | ,000  | ,000  | 1,000 |
|                              | 502300006            | ,000             | ,000  | ,000  | ,000  |
|                              | 502300007            | ,000             | ,000  | ,000  | ,000  |
|                              | 502300214            | ,000             | ,000  | ,000  | ,000  |
|                              | 502300411            | ,000             | ,000  | ,000  | ,000  |
|                              | 502300415            | ,000             | ,000  | ,000  | ,000  |
|                              | 502300416            | ,000             | ,000  | ,000  | ,000  |
|                              | 502300811            | ,000             | ,000  | ,000  | ,000  |
|                              | 502300913            | ,000             | ,000  | ,000  | ,000  |
| sv3 tredjedelar för standard | 1 andra tredjedelen  |                  |       |       |       |
|                              | 2 första tredjedelen |                  |       |       |       |
|                              | 3 tredje tredjedelen |                  |       |       |       |

## Categorical Variables Codings

|                              |                      | Parameter coding |       |       |       |
|------------------------------|----------------------|------------------|-------|-------|-------|
|                              |                      | (28)             | (29)  | (30)  | (31)  |
| VASTY2 (SAIR*10000)+VASTY    | 403073101            | ,000             | ,000  | ,000  | ,000  |
|                              | 403073102            | ,000             | ,000  | ,000  | ,000  |
|                              | 403073103            | ,000             | ,000  | ,000  | ,000  |
|                              | 403073202            | ,000             | ,000  | ,000  | ,000  |
|                              | 403073203            | ,000             | ,000  | ,000  | ,000  |
|                              | 403073204            | ,000             | ,000  | ,000  | ,000  |
|                              | 403073303            | ,000             | ,000  | ,000  | ,000  |
|                              | 403073651            | ,000             | ,000  | ,000  | ,000  |
|                              | 403073771            | ,000             | ,000  | ,000  | ,000  |
|                              | 403133102            | ,000             | ,000  | ,000  | ,000  |
|                              | 403133106            | ,000             | ,000  | ,000  | ,000  |
|                              | 403133107            | ,000             | ,000  | ,000  | ,000  |
|                              | 403133109            | ,000             | ,000  | ,000  | ,000  |
|                              | 403133202            | ,000             | ,000  | ,000  | ,000  |
|                              | 403133203            | ,000             | ,000  | ,000  | ,000  |
|                              | 403133204            | ,000             | ,000  | ,000  | ,000  |
|                              | 403133315            | ,000             | ,000  | ,000  | ,000  |
|                              | 403133322            | ,000             | ,000  | ,000  | ,000  |
|                              | 403133401            | ,000             | ,000  | ,000  | ,000  |
|                              | 403133402            | ,000             | ,000  | ,000  | ,000  |
|                              | 403133550            | ,000             | ,000  | ,000  | ,000  |
|                              | 403133772            | ,000             | ,000  | ,000  | ,000  |
|                              | 403135803            | ,000             | ,000  | ,000  | ,000  |
|                              | 404060001            | ,000             | ,000  | ,000  | ,000  |
|                              | 404060002            | ,000             | ,000  | ,000  | ,000  |
|                              | 404310003            | ,000             | ,000  | ,000  | ,000  |
|                              | 404310004            | ,000             | ,000  | ,000  | ,000  |
|                              | 502300005            | ,000             | ,000  | ,000  | ,000  |
|                              | 502300006            | 1,000            | ,000  | ,000  | ,000  |
|                              | 502300007            | ,000             | 1,000 | ,000  | ,000  |
|                              | 502300214            | ,000             | ,000  | 1,000 | ,000  |
|                              | 502300411            | ,000             | ,000  | ,000  | 1,000 |
|                              | 502300415            | ,000             | ,000  | ,000  | ,000  |
|                              | 502300416            | ,000             | ,000  | ,000  | ,000  |
|                              | 502300811            | ,000             | ,000  | ,000  | ,000  |
|                              | 502300913            | ,000             | ,000  | ,000  | ,000  |
| sv3 tredjedelar för standard | 1 andra tredjedelen  |                  |       |       |       |
|                              | 2 första tredjedelen |                  |       |       |       |
|                              | 3 tredje tredjedelen |                  |       |       |       |

## Categorical Variables Codings

|                              |                      | Parameter coding |       |       |       |
|------------------------------|----------------------|------------------|-------|-------|-------|
|                              |                      | (32)             | (33)  | (34)  | (35)  |
| VASTY2 (SAIR*10000)+VASTY    | 403073101            | ,000             | ,000  | ,000  | ,000  |
|                              | 403073102            | ,000             | ,000  | ,000  | ,000  |
|                              | 403073103            | ,000             | ,000  | ,000  | ,000  |
|                              | 403073202            | ,000             | ,000  | ,000  | ,000  |
|                              | 403073203            | ,000             | ,000  | ,000  | ,000  |
|                              | 403073204            | ,000             | ,000  | ,000  | ,000  |
|                              | 403073303            | ,000             | ,000  | ,000  | ,000  |
|                              | 403073651            | ,000             | ,000  | ,000  | ,000  |
|                              | 403073771            | ,000             | ,000  | ,000  | ,000  |
|                              | 403133102            | ,000             | ,000  | ,000  | ,000  |
|                              | 403133106            | ,000             | ,000  | ,000  | ,000  |
|                              | 403133107            | ,000             | ,000  | ,000  | ,000  |
|                              | 403133109            | ,000             | ,000  | ,000  | ,000  |
|                              | 403133202            | ,000             | ,000  | ,000  | ,000  |
|                              | 403133203            | ,000             | ,000  | ,000  | ,000  |
|                              | 403133204            | ,000             | ,000  | ,000  | ,000  |
|                              | 403133315            | ,000             | ,000  | ,000  | ,000  |
|                              | 403133322            | ,000             | ,000  | ,000  | ,000  |
|                              | 403133401            | ,000             | ,000  | ,000  | ,000  |
|                              | 403133402            | ,000             | ,000  | ,000  | ,000  |
|                              | 403133550            | ,000             | ,000  | ,000  | ,000  |
|                              | 403133772            | ,000             | ,000  | ,000  | ,000  |
|                              | 403135803            | ,000             | ,000  | ,000  | ,000  |
|                              | 404060001            | ,000             | ,000  | ,000  | ,000  |
|                              | 404060002            | ,000             | ,000  | ,000  | ,000  |
|                              | 404310003            | ,000             | ,000  | ,000  | ,000  |
|                              | 404310004            | ,000             | ,000  | ,000  | ,000  |
|                              | 502300005            | ,000             | ,000  | ,000  | ,000  |
|                              | 502300006            | ,000             | ,000  | ,000  | ,000  |
|                              | 502300007            | ,000             | ,000  | ,000  | ,000  |
|                              | 502300214            | ,000             | ,000  | ,000  | ,000  |
|                              | 502300411            | ,000             | ,000  | ,000  | ,000  |
|                              | 502300415            | 1,000            | ,000  | ,000  | ,000  |
|                              | 502300416            | ,000             | 1,000 | ,000  | ,000  |
|                              | 502300811            | ,000             | ,000  | 1,000 | ,000  |
|                              | 502300913            | ,000             | ,000  | ,000  | 1,000 |
| sv3 tredjedelar för standard | 1 andra tredjedelen  |                  |       |       |       |
|                              | 2 första tredjedelen |                  |       |       |       |
|                              | 3 tredje tredjedelen |                  |       |       |       |

**Block 0: Beginning Block**



Classification Table<sup>a,b</sup>

| Observed           |                             |                      | Predicted                   |                      |
|--------------------|-----------------------------|----------------------|-----------------------------|----------------------|
|                    |                             |                      | dod01 dödsfall ja eller nej |                      |
|                    |                             |                      | 0 inget dödsfall            | 1 minst ett dödsfall |
| Step 0             | dod01 dödsfall ja eller nej | 0 inget dödsfall     | 11839                       | 0                    |
|                    |                             | 1 minst ett dödsfall | 636                         | 0                    |
| Overall Percentage |                             |                      |                             |                      |

Classification Table<sup>a,b</sup>

| Observed           |                             |                      | Predicted          |
|--------------------|-----------------------------|----------------------|--------------------|
|                    |                             |                      | Percentage Correct |
| Step 0             | dod01 dödsfall ja eller nej | 0 inget dödsfall     | 100,0              |
|                    |                             | 1 minst ett dödsfall | ,0                 |
| Overall Percentage |                             |                      | 94,9               |

a. Constant is included in the model.

b. The cut value is ,500

Variables in the Equation

|                 | B      | S.E. | Wald     | df | Sig. | Exp(B) |
|-----------------|--------|------|----------|----|------|--------|
| Step 0 Constant | -2,924 | ,041 | 5160,279 | 1  | ,000 | ,054   |

## Variables not in the Equation

|        |                    |            | Score   | df | Sig. |
|--------|--------------------|------------|---------|----|------|
| Step 0 | Variables          | sv3        | 61,737  | 2  | ,000 |
|        |                    | sv3(1)     | 61,635  | 1  | ,000 |
|        |                    | sv3(2)     | 19,457  | 1  | ,000 |
|        |                    | VASTY2     | 635,545 | 35 | ,000 |
|        |                    | VASTY2(1)  | 2,519   | 1  | ,113 |
|        |                    | VASTY2(2)  | 6,299   | 1  | ,012 |
|        |                    | VASTY2(3)  | 8,957   | 1  | ,003 |
|        |                    | VASTY2(4)  | ,151    | 1  | ,698 |
|        |                    | VASTY2(5)  | 7,537   | 1  | ,006 |
|        |                    | VASTY2(6)  | 20,142  | 1  | ,000 |
|        |                    | VASTY2(7)  | 127,387 | 1  | ,000 |
|        |                    | VASTY2(8)  | 8,957   | 1  | ,003 |
|        |                    | VASTY2(9)  | ,163    | 1  | ,687 |
|        |                    | VASTY2(10) | 7,570   | 1  | ,006 |
|        |                    | VASTY2(11) | ,113    | 1  | ,737 |
|        |                    | VASTY2(12) | 47,021  | 1  | ,000 |
|        |                    | VASTY2(13) | 90,515  | 1  | ,000 |
|        |                    | VASTY2(14) | 7,570   | 1  | ,006 |
|        |                    | VASTY2(15) | ,151    | 1  | ,698 |
|        |                    | VASTY2(16) | 4,298   | 1  | ,038 |
|        |                    | VASTY2(17) | 20,199  | 1  | ,000 |
|        |                    | VASTY2(18) | 17,916  | 1  | ,000 |
|        |                    | VASTY2(19) | 18,086  | 1  | ,000 |
|        |                    | VASTY2(20) | 10,563  | 1  | ,001 |
|        |                    | VASTY2(21) | 1,696   | 1  | ,193 |
|        |                    | VASTY2(22) | 26,693  | 1  | ,000 |
|        |                    | VASTY2(23) | 1,125   | 1  | ,289 |
|        |                    | VASTY2(24) | 72,662  | 1  | ,000 |
|        |                    | VASTY2(25) | 2,477   | 1  | ,116 |
|        |                    | VASTY2(26) | 16,006  | 1  | ,000 |
|        |                    | VASTY2(27) | 20,256  | 1  | ,000 |
|        |                    | VASTY2(28) | 12,309  | 1  | ,000 |
|        |                    | VASTY2(29) | 20,256  | 1  | ,000 |
|        |                    | VASTY2(30) | 1,263   | 1  | ,261 |
|        |                    | VASTY2(31) | 20,256  | 1  | ,000 |
|        |                    | VASTY2(32) | 15,810  | 1  | ,000 |
|        |                    | VASTY2(33) | 17,973  | 1  | ,000 |
|        |                    | VASTY2(34) | ,693    | 1  | ,405 |
|        |                    | VASTY2(35) | 17,360  | 1  | ,000 |
|        | Overall Statistics |            | 643,278 | 37 | ,000 |

**Block 1: Method = Enter**

## Omnibus Tests of Model Coefficients

|        |       | Chi-square | df | Sig. |
|--------|-------|------------|----|------|
| Step 1 | Step  | 709,696    | 37 | ,000 |
|        | Block | 709,696    | 37 | ,000 |
|        | Model | 709,696    | 37 | ,000 |

## Model Summary

| Step | -2 Log likelihood     | Cox & Snell R Square | Nagelkerke R Square |
|------|-----------------------|----------------------|---------------------|
| 1    | 4315,146 <sup>a</sup> | ,055                 | ,167                |

a. Estimation terminated at iteration number 20 because maximum iterations has been reached. Final solution cannot be found.

Classification Table<sup>a</sup>

| Observed           |                             | Predicted                   |                      |   |
|--------------------|-----------------------------|-----------------------------|----------------------|---|
|                    |                             | dod01 dödsfall ja eller nej |                      |   |
|                    |                             | 0 inget dödsfall            | 1 minst ett dödsfall |   |
| Step 1             | dod01 dödsfall ja eller nej | 0 inget dödsfall            | 11839                | 0 |
|                    |                             | 1 minst ett dödsfall        | 636                  | 0 |
| Overall Percentage |                             |                             |                      |   |

Classification Table<sup>a</sup>

| Observed           |                             | Predicted          |
|--------------------|-----------------------------|--------------------|
|                    |                             | Percentage Correct |
| Step 1             | dod01 dödsfall ja eller nej | 100,0              |
|                    |                             | ,0                 |
| Overall Percentage |                             | 94,9               |

a. The cut value is ,500

## Variables in the Equation

|                         | B       | S.E.     | Wald    | df | Sig. | Exp(B) |
|-------------------------|---------|----------|---------|----|------|--------|
| Step 1 <sup>a</sup> sv3 |         |          | 7,118   | 2  | ,028 |        |
| sv3(1)                  | -,161   | ,116     | 1,927   | 1  | ,165 | ,851   |
| sv3(2)                  | ,174    | ,110     | 2,506   | 1  | ,113 | 1,190  |
| VASTY2                  |         |          | 219,886 | 35 | ,000 |        |
| VASTY2(1)               | ,572    | ,344     | 2,770   | 1  | ,096 | 1,771  |
| VASTY2(2)               | ,654    | ,338     | 3,741   | 1  | ,053 | 1,923  |
| VASTY2(3)               | ,884    | ,331     | 7,116   | 1  | ,008 | 2,421  |
| VASTY2(4)               | ,232    | ,369     | ,395    | 1  | ,529 | 1,261  |
| VASTY2(5)               | -,675   | ,496     | 1,854   | 1  | ,173 | ,509   |
| VASTY2(6)               | -18,126 | 2105,897 | ,000    | 1  | ,993 | ,000   |
| VASTY2(7)               | 1,739   | ,306     | 32,391  | 1  | ,000 | 5,690  |
| VASTY2(8)               | ,911    | ,332     | 7,529   | 1  | ,006 | 2,487  |
| VASTY2(9)               | ,391    | ,361     | 1,172   | 1  | ,279 | 1,478  |
| VASTY2(10)              | ,669    | ,338     | 3,920   | 1  | ,048 | 1,952  |
| VASTY2(11)              | ,381    | ,357     | 1,142   | 1  | ,285 | 1,464  |
| VASTY2(12)              | 1,196   | ,318     | 14,164  | 1  | ,000 | 3,305  |
| VASTY2(13)              | 1,407   | ,314     | 20,080  | 1  | ,000 | 4,085  |
| VASTY2(14)              | ,725    | ,335     | 4,695   | 1  | ,030 | 2,065  |
| VASTY2(15)              | ,083    | ,372     | ,050    | 1  | ,824 | 1,086  |
| VASTY2(16)              | -,855   | ,644     | 1,763   | 1  | ,184 | ,425   |
| VASTY2(17)              | -17,931 | 2101,558 | ,000    | 1  | ,993 | ,000   |
| VASTY2(18)              | -2,502  | 1,041    | 5,779   | 1  | ,016 | ,082   |
| VASTY2(19)              | -2,510  | 1,041    | 5,812   | 1  | ,016 | ,081   |
| VASTY2(20)              | -1,444  | ,642     | 5,055   | 1  | ,025 | ,236   |
| VASTY2(21)              | ,617    | ,345     | 3,193   | 1  | ,074 | 1,854  |
| VASTY2(22)              | 1,126   | ,320     | 12,383  | 1  | ,000 | 3,084  |
| VASTY2(23)              | ,551    | ,348     | 2,512   | 1  | ,113 | 1,735  |
| VASTY2(24)              | 1,418   | ,311     | 20,832  | 1  | ,000 | 4,129  |
| VASTY2(25)              | -,153   | ,436     | ,123    | 1  | ,726 | ,858   |
| VASTY2(26)              | -17,994 | 2353,533 | ,000    | 1  | ,994 | ,000   |
| VASTY2(27)              | -18,075 | 2099,032 | ,000    | 1  | ,993 | ,000   |
| VASTY2(28)              | -18,145 | 2679,357 | ,000    | 1  | ,995 | ,000   |
| VASTY2(29)              | -18,150 | 2100,910 | ,000    | 1  | ,993 | ,000   |
| VASTY2(30)              | ,067    | ,387     | ,030    | 1  | ,862 | 1,069  |
| VASTY2(31)              | -17,833 | 2100,466 | ,000    | 1  | ,993 | ,000   |
| VASTY2(32)              | -1,800  | ,764     | 5,550   | 1  | ,018 | ,165   |
| VASTY2(33)              | -2,504  | 1,041    | 5,787   | 1  | ,016 | ,082   |
| VASTY2(34)              | ,484    | ,350     | 1,910   | 1  | ,167 | 1,623  |
| VASTY2(35)              | -17,998 | 2261,672 | ,000    | 1  | ,994 | ,000   |
| Constant                | -3,227  | ,277     | 135,542 | 1  | ,000 | ,040   |

## Variables in the Equation

|                     |            | 95% C.I. for EXP(B) |        |
|---------------------|------------|---------------------|--------|
|                     |            | Lower               | Upper  |
| Step 1 <sup>a</sup> | sv3        |                     |        |
|                     | sv3(1)     | ,679                | 1,068  |
|                     | sv3(2)     | ,959                | 1,476  |
|                     | VASTY2     |                     |        |
|                     | VASTY2(1)  | ,903                | 3,473  |
|                     | VASTY2(2)  | ,991                | 3,729  |
|                     | VASTY2(3)  | 1,264               | 4,635  |
|                     | VASTY2(4)  | ,612                | 2,601  |
|                     | VASTY2(5)  | ,193                | 1,345  |
|                     | VASTY2(6)  | ,000                | .      |
|                     | VASTY2(7)  | 3,127               | 10,355 |
|                     | VASTY2(8)  | 1,297               | 4,769  |
|                     | VASTY2(9)  | ,729                | 2,997  |
|                     | VASTY2(10) | 1,007               | 3,784  |
|                     | VASTY2(11) | ,728                | 2,946  |
|                     | VASTY2(12) | 1,773               | 6,161  |
|                     | VASTY2(13) | 2,207               | 7,561  |
|                     | VASTY2(14) | 1,072               | 3,979  |
|                     | VASTY2(15) | ,524                | 2,254  |
|                     | VASTY2(16) | ,121                | 1,502  |
|                     | VASTY2(17) | ,000                | .      |
|                     | VASTY2(18) | ,011                | ,630   |
|                     | VASTY2(19) | ,011                | ,625   |
|                     | VASTY2(20) | ,067                | ,831   |
|                     | VASTY2(21) | ,942                | 3,649  |
|                     | VASTY2(22) | 1,647               | 5,776  |
|                     | VASTY2(23) | ,878                | 3,430  |
|                     | VASTY2(24) | 2,246               | 7,592  |
|                     | VASTY2(25) | ,365                | 2,015  |
|                     | VASTY2(26) | ,000                | .      |
|                     | VASTY2(27) | ,000                | .      |
|                     | VASTY2(28) | ,000                | .      |
|                     | VASTY2(29) | ,000                | .      |
|                     | VASTY2(30) | ,501                | 2,282  |
|                     | VASTY2(31) | ,000                | .      |
|                     | VASTY2(32) | ,037                | ,739   |
|                     | VASTY2(33) | ,011                | ,629   |
|                     | VASTY2(34) | ,817                | 3,226  |
|                     | VASTY2(35) | ,000                | .      |
|                     | Constant   |                     |        |

a. Variable(s) entered on step 1: sv3, VASTY2.

```

1
2
3 LOGISTIC REGRESSION VARIABLES dod01
4   /METHOD=ENTER sv5 VASTY2
5   /CONTRAST (sv5)=Indicator(1)
6   /CONTRAST (VASTY2)=Indicator(1)
7   /PRINT=CI(95)
8   /CRITERIA=PIN(0.05) POUT(0.10) ITERATE(20) CUT(0.5).
9

```

## Logistic Regression

[DataSet6] C:\cWordjan\Rafaela\_VCS\alla\_tillsammans\abo\_bjo\_vasa\_v1.sav

### Case Processing Summary

| Unweighted Cases <sup>a</sup> |                      | N     | Percent |
|-------------------------------|----------------------|-------|---------|
| Selected Cases                | Included in Analysis | 12475 | 100,0   |
|                               | Missing Cases        | 0     | ,0      |
|                               | Total                | 12475 | 100,0   |
| Unselected Cases              |                      | 0     | ,0      |
| Total                         |                      | 12475 | 100,0   |

a. If weight is in effect, see classification table for the total number of cases.

### Dependent Variable Encoding

| Original Value       | Internal Value |
|----------------------|----------------|
| 0 inget dödsfall     | 0              |
| 1 minst ett dödsfall | 1              |

## Categorical Variables Codings

|                                               | Frequency | Parameter coding |       |       |
|-----------------------------------------------|-----------|------------------|-------|-------|
|                                               |           | (1)              | (2)   | (3)   |
| VASTY2 (SAIR*10000)+VASTY 403073101           | 365       | ,000             | ,000  | ,000  |
| 403073102                                     | 362       | 1,000            | ,000  | ,000  |
| 403073103                                     | 365       | ,000             | 1,000 | ,000  |
| 403073202                                     | 365       | ,000             | ,000  | 1,000 |
| 403073203                                     | 365       | ,000             | ,000  | ,000  |
| 403073204                                     | 330       | ,000             | ,000  | ,000  |
| 403073303                                     | 364       | ,000             | ,000  | ,000  |
| 403073651                                     | 362       | ,000             | ,000  | ,000  |
| 403073771                                     | 365       | ,000             | ,000  | ,000  |
| 403133102                                     | 341       | ,000             | ,000  | ,000  |
| 403133106                                     | 365       | ,000             | ,000  | ,000  |
| 403133107                                     | 365       | ,000             | ,000  | ,000  |
| 403133109                                     | 365       | ,000             | ,000  | ,000  |
| 403133202                                     | 365       | ,000             | ,000  | ,000  |
| 403133203                                     | 365       | ,000             | ,000  | ,000  |
| 403133204                                     | 365       | ,000             | ,000  | ,000  |
| 403133315                                     | 177       | ,000             | ,000  | ,000  |
| 403133322                                     | 365       | ,000             | ,000  | ,000  |
| 403133401                                     | 362       | ,000             | ,000  | ,000  |
| 403133402                                     | 365       | ,000             | ,000  | ,000  |
| 403133550                                     | 298       | ,000             | ,000  | ,000  |
| 403133772                                     | 365       | ,000             | ,000  | ,000  |
| 403135803                                     | 365       | ,000             | ,000  | ,000  |
| 404060001                                     | 365       | ,000             | ,000  | ,000  |
| 404060002                                     | 366       | ,000             | ,000  | ,000  |
| 404310003                                     | 291       | ,000             | ,000  | ,000  |
| 404310004                                     | 291       | ,000             | ,000  | ,000  |
| 502300005                                     | 366       | ,000             | ,000  | ,000  |
| 502300006                                     | 225       | ,000             | ,000  | ,000  |
| 502300007                                     | 366       | ,000             | ,000  | ,000  |
| 502300214                                     | 366       | ,000             | ,000  | ,000  |
| 502300411                                     | 366       | ,000             | ,000  | ,000  |
| 502300415                                     | 360       | ,000             | ,000  | ,000  |
| 502300416                                     | 363       | ,000             | ,000  | ,000  |
| 502300811                                     | 364       | ,000             | ,000  | ,000  |
| 502300913                                     | 315       | ,000             | ,000  | ,000  |
| sv5 kvintiler för standard 1 tredje kvintilen | 1863      | ,000             | ,000  | ,000  |
| 2 första kvintilen                            | 3570      | 1,000            | ,000  | ,000  |
| 3 andra kvintilen                             | 1759      | ,000             | 1,000 | ,000  |
| 4 fjärde kvintilen                            | 2327      | ,000             | ,000  | 1,000 |
| 5 femte kvintilen                             | 2956      | ,000             | ,000  | ,000  |

## Categorical Variables Codings

|                            |                    | Parameter coding |       |       |       |
|----------------------------|--------------------|------------------|-------|-------|-------|
|                            |                    | (4)              | (5)   | (6)   | (7)   |
| VASTY2 (SAIR*10000)+VASTY  | 403073101          | ,000             | ,000  | ,000  | ,000  |
|                            | 403073102          | ,000             | ,000  | ,000  | ,000  |
|                            | 403073103          | ,000             | ,000  | ,000  | ,000  |
|                            | 403073202          | ,000             | ,000  | ,000  | ,000  |
|                            | 403073203          | 1,000            | ,000  | ,000  | ,000  |
|                            | 403073204          | ,000             | 1,000 | ,000  | ,000  |
|                            | 403073303          | ,000             | ,000  | 1,000 | ,000  |
|                            | 403073651          | ,000             | ,000  | ,000  | 1,000 |
|                            | 403073771          | ,000             | ,000  | ,000  | ,000  |
|                            | 403133102          | ,000             | ,000  | ,000  | ,000  |
|                            | 403133106          | ,000             | ,000  | ,000  | ,000  |
|                            | 403133107          | ,000             | ,000  | ,000  | ,000  |
|                            | 403133109          | ,000             | ,000  | ,000  | ,000  |
|                            | 403133202          | ,000             | ,000  | ,000  | ,000  |
|                            | 403133203          | ,000             | ,000  | ,000  | ,000  |
|                            | 403133204          | ,000             | ,000  | ,000  | ,000  |
|                            | 403133315          | ,000             | ,000  | ,000  | ,000  |
|                            | 403133322          | ,000             | ,000  | ,000  | ,000  |
|                            | 403133401          | ,000             | ,000  | ,000  | ,000  |
|                            | 403133402          | ,000             | ,000  | ,000  | ,000  |
|                            | 403133550          | ,000             | ,000  | ,000  | ,000  |
|                            | 403133772          | ,000             | ,000  | ,000  | ,000  |
|                            | 403135803          | ,000             | ,000  | ,000  | ,000  |
|                            | 404060001          | ,000             | ,000  | ,000  | ,000  |
|                            | 404060002          | ,000             | ,000  | ,000  | ,000  |
|                            | 404310003          | ,000             | ,000  | ,000  | ,000  |
|                            | 404310004          | ,000             | ,000  | ,000  | ,000  |
|                            | 502300005          | ,000             | ,000  | ,000  | ,000  |
|                            | 502300006          | ,000             | ,000  | ,000  | ,000  |
|                            | 502300007          | ,000             | ,000  | ,000  | ,000  |
|                            | 502300214          | ,000             | ,000  | ,000  | ,000  |
|                            | 502300411          | ,000             | ,000  | ,000  | ,000  |
|                            | 502300415          | ,000             | ,000  | ,000  | ,000  |
|                            | 502300416          | ,000             | ,000  | ,000  | ,000  |
|                            | 502300811          | ,000             | ,000  | ,000  | ,000  |
|                            | 502300913          | ,000             | ,000  | ,000  | ,000  |
| sv5 kvintiler för standard | 1 tredje kvintilen | ,000             |       |       |       |
|                            | 2 första kvintilen | ,000             |       |       |       |
|                            | 3 andra kvintilen  | ,000             |       |       |       |
|                            | 4 fjärde kvintilen | ,000             |       |       |       |
|                            | 5 femte kvintilen  | 1,000            |       |       |       |



## Categorical Variables Codings

|                            |                    | Parameter coding |       |       |       |
|----------------------------|--------------------|------------------|-------|-------|-------|
|                            |                    | (8)              | (9)   | (10)  | (11)  |
| VASTY2 (SAIR*10000)+VASTY  | 403073101          | ,000             | ,000  | ,000  | ,000  |
|                            | 403073102          | ,000             | ,000  | ,000  | ,000  |
|                            | 403073103          | ,000             | ,000  | ,000  | ,000  |
|                            | 403073202          | ,000             | ,000  | ,000  | ,000  |
|                            | 403073203          | ,000             | ,000  | ,000  | ,000  |
|                            | 403073204          | ,000             | ,000  | ,000  | ,000  |
|                            | 403073303          | ,000             | ,000  | ,000  | ,000  |
|                            | 403073651          | ,000             | ,000  | ,000  | ,000  |
|                            | 403073771          | 1,000            | ,000  | ,000  | ,000  |
|                            | 403133102          | ,000             | 1,000 | ,000  | ,000  |
|                            | 403133106          | ,000             | ,000  | 1,000 | ,000  |
|                            | 403133107          | ,000             | ,000  | ,000  | 1,000 |
|                            | 403133109          | ,000             | ,000  | ,000  | ,000  |
|                            | 403133202          | ,000             | ,000  | ,000  | ,000  |
|                            | 403133203          | ,000             | ,000  | ,000  | ,000  |
|                            | 403133204          | ,000             | ,000  | ,000  | ,000  |
|                            | 403133315          | ,000             | ,000  | ,000  | ,000  |
|                            | 403133322          | ,000             | ,000  | ,000  | ,000  |
|                            | 403133401          | ,000             | ,000  | ,000  | ,000  |
|                            | 403133402          | ,000             | ,000  | ,000  | ,000  |
|                            | 403133550          | ,000             | ,000  | ,000  | ,000  |
|                            | 403133772          | ,000             | ,000  | ,000  | ,000  |
|                            | 403135803          | ,000             | ,000  | ,000  | ,000  |
|                            | 404060001          | ,000             | ,000  | ,000  | ,000  |
|                            | 404060002          | ,000             | ,000  | ,000  | ,000  |
|                            | 404310003          | ,000             | ,000  | ,000  | ,000  |
|                            | 404310004          | ,000             | ,000  | ,000  | ,000  |
|                            | 502300005          | ,000             | ,000  | ,000  | ,000  |
|                            | 502300006          | ,000             | ,000  | ,000  | ,000  |
|                            | 502300007          | ,000             | ,000  | ,000  | ,000  |
|                            | 502300214          | ,000             | ,000  | ,000  | ,000  |
|                            | 502300411          | ,000             | ,000  | ,000  | ,000  |
|                            | 502300415          | ,000             | ,000  | ,000  | ,000  |
|                            | 502300416          | ,000             | ,000  | ,000  | ,000  |
|                            | 502300811          | ,000             | ,000  | ,000  | ,000  |
|                            | 502300913          | ,000             | ,000  | ,000  | ,000  |
| sv5 kvintiler för standard | 1 tredje kvintilen |                  |       |       |       |
|                            | 2 första kvintilen |                  |       |       |       |
|                            | 3 andra kvintilen  |                  |       |       |       |
|                            | 4 fjärde kvintilen |                  |       |       |       |
|                            | 5 femte kvintilen  |                  |       |       |       |

## Categorical Variables Codings

|                            |                    | Parameter coding |       |       |       |
|----------------------------|--------------------|------------------|-------|-------|-------|
|                            |                    | (12)             | (13)  | (14)  | (15)  |
| VASTY2 (SAIR*10000)+VASTY  | 403073101          | ,000             | ,000  | ,000  | ,000  |
|                            | 403073102          | ,000             | ,000  | ,000  | ,000  |
|                            | 403073103          | ,000             | ,000  | ,000  | ,000  |
|                            | 403073202          | ,000             | ,000  | ,000  | ,000  |
|                            | 403073203          | ,000             | ,000  | ,000  | ,000  |
|                            | 403073204          | ,000             | ,000  | ,000  | ,000  |
|                            | 403073303          | ,000             | ,000  | ,000  | ,000  |
|                            | 403073651          | ,000             | ,000  | ,000  | ,000  |
|                            | 403073771          | ,000             | ,000  | ,000  | ,000  |
|                            | 403133102          | ,000             | ,000  | ,000  | ,000  |
|                            | 403133106          | ,000             | ,000  | ,000  | ,000  |
|                            | 403133107          | ,000             | ,000  | ,000  | ,000  |
|                            | 403133109          | 1,000            | ,000  | ,000  | ,000  |
|                            | 403133202          | ,000             | 1,000 | ,000  | ,000  |
|                            | 403133203          | ,000             | ,000  | 1,000 | ,000  |
|                            | 403133204          | ,000             | ,000  | ,000  | 1,000 |
|                            | 403133315          | ,000             | ,000  | ,000  | ,000  |
|                            | 403133322          | ,000             | ,000  | ,000  | ,000  |
|                            | 403133401          | ,000             | ,000  | ,000  | ,000  |
|                            | 403133402          | ,000             | ,000  | ,000  | ,000  |
|                            | 403133550          | ,000             | ,000  | ,000  | ,000  |
|                            | 403133772          | ,000             | ,000  | ,000  | ,000  |
|                            | 403135803          | ,000             | ,000  | ,000  | ,000  |
|                            | 404060001          | ,000             | ,000  | ,000  | ,000  |
|                            | 404060002          | ,000             | ,000  | ,000  | ,000  |
|                            | 404310003          | ,000             | ,000  | ,000  | ,000  |
|                            | 404310004          | ,000             | ,000  | ,000  | ,000  |
|                            | 502300005          | ,000             | ,000  | ,000  | ,000  |
|                            | 502300006          | ,000             | ,000  | ,000  | ,000  |
|                            | 502300007          | ,000             | ,000  | ,000  | ,000  |
|                            | 502300214          | ,000             | ,000  | ,000  | ,000  |
|                            | 502300411          | ,000             | ,000  | ,000  | ,000  |
|                            | 502300415          | ,000             | ,000  | ,000  | ,000  |
|                            | 502300416          | ,000             | ,000  | ,000  | ,000  |
|                            | 502300811          | ,000             | ,000  | ,000  | ,000  |
|                            | 502300913          | ,000             | ,000  | ,000  | ,000  |
| sv5 kvintiler för standard | 1 tredje kvintilen |                  |       |       |       |
|                            | 2 första kvintilen |                  |       |       |       |
|                            | 3 andra kvintilen  |                  |       |       |       |
|                            | 4 fjärde kvintilen |                  |       |       |       |
|                            | 5 femte kvintilen  |                  |       |       |       |

## Categorical Variables Codings

|                            |                    | Parameter coding |       |       |       |
|----------------------------|--------------------|------------------|-------|-------|-------|
|                            |                    | (16)             | (17)  | (18)  | (19)  |
| VASTY2 (SAIR*10000)+VASTY  | 403073101          | ,000             | ,000  | ,000  | ,000  |
|                            | 403073102          | ,000             | ,000  | ,000  | ,000  |
|                            | 403073103          | ,000             | ,000  | ,000  | ,000  |
|                            | 403073202          | ,000             | ,000  | ,000  | ,000  |
|                            | 403073203          | ,000             | ,000  | ,000  | ,000  |
|                            | 403073204          | ,000             | ,000  | ,000  | ,000  |
|                            | 403073303          | ,000             | ,000  | ,000  | ,000  |
|                            | 403073651          | ,000             | ,000  | ,000  | ,000  |
|                            | 403073771          | ,000             | ,000  | ,000  | ,000  |
|                            | 403133102          | ,000             | ,000  | ,000  | ,000  |
|                            | 403133106          | ,000             | ,000  | ,000  | ,000  |
|                            | 403133107          | ,000             | ,000  | ,000  | ,000  |
|                            | 403133109          | ,000             | ,000  | ,000  | ,000  |
|                            | 403133202          | ,000             | ,000  | ,000  | ,000  |
|                            | 403133203          | ,000             | ,000  | ,000  | ,000  |
|                            | 403133204          | ,000             | ,000  | ,000  | ,000  |
|                            | 403133315          | 1,000            | ,000  | ,000  | ,000  |
|                            | 403133322          | ,000             | 1,000 | ,000  | ,000  |
|                            | 403133401          | ,000             | ,000  | 1,000 | ,000  |
|                            | 403133402          | ,000             | ,000  | ,000  | 1,000 |
|                            | 403133550          | ,000             | ,000  | ,000  | ,000  |
|                            | 403133772          | ,000             | ,000  | ,000  | ,000  |
|                            | 403135803          | ,000             | ,000  | ,000  | ,000  |
|                            | 404060001          | ,000             | ,000  | ,000  | ,000  |
|                            | 404060002          | ,000             | ,000  | ,000  | ,000  |
|                            | 404310003          | ,000             | ,000  | ,000  | ,000  |
|                            | 404310004          | ,000             | ,000  | ,000  | ,000  |
|                            | 502300005          | ,000             | ,000  | ,000  | ,000  |
|                            | 502300006          | ,000             | ,000  | ,000  | ,000  |
|                            | 502300007          | ,000             | ,000  | ,000  | ,000  |
|                            | 502300214          | ,000             | ,000  | ,000  | ,000  |
|                            | 502300411          | ,000             | ,000  | ,000  | ,000  |
|                            | 502300415          | ,000             | ,000  | ,000  | ,000  |
|                            | 502300416          | ,000             | ,000  | ,000  | ,000  |
|                            | 502300811          | ,000             | ,000  | ,000  | ,000  |
|                            | 502300913          | ,000             | ,000  | ,000  | ,000  |
| sv5 kvintiler för standard | 1 tredje kvintilen |                  |       |       |       |
|                            | 2 första kvintilen |                  |       |       |       |
|                            | 3 andra kvintilen  |                  |       |       |       |
|                            | 4 fjärde kvintilen |                  |       |       |       |
|                            | 5 femte kvintilen  |                  |       |       |       |

## Categorical Variables Codings

|                            |                    | Parameter coding |       |       |       |
|----------------------------|--------------------|------------------|-------|-------|-------|
|                            |                    | (20)             | (21)  | (22)  | (23)  |
| VASTY2 (SAIR*10000)+VASTY  | 403073101          | ,000             | ,000  | ,000  | ,000  |
|                            | 403073102          | ,000             | ,000  | ,000  | ,000  |
|                            | 403073103          | ,000             | ,000  | ,000  | ,000  |
|                            | 403073202          | ,000             | ,000  | ,000  | ,000  |
|                            | 403073203          | ,000             | ,000  | ,000  | ,000  |
|                            | 403073204          | ,000             | ,000  | ,000  | ,000  |
|                            | 403073303          | ,000             | ,000  | ,000  | ,000  |
|                            | 403073651          | ,000             | ,000  | ,000  | ,000  |
|                            | 403073771          | ,000             | ,000  | ,000  | ,000  |
|                            | 403133102          | ,000             | ,000  | ,000  | ,000  |
|                            | 403133106          | ,000             | ,000  | ,000  | ,000  |
|                            | 403133107          | ,000             | ,000  | ,000  | ,000  |
|                            | 403133109          | ,000             | ,000  | ,000  | ,000  |
|                            | 403133202          | ,000             | ,000  | ,000  | ,000  |
|                            | 403133203          | ,000             | ,000  | ,000  | ,000  |
|                            | 403133204          | ,000             | ,000  | ,000  | ,000  |
|                            | 403133315          | ,000             | ,000  | ,000  | ,000  |
|                            | 403133322          | ,000             | ,000  | ,000  | ,000  |
|                            | 403133401          | ,000             | ,000  | ,000  | ,000  |
|                            | 403133402          | ,000             | ,000  | ,000  | ,000  |
|                            | 403133550          | 1,000            | ,000  | ,000  | ,000  |
|                            | 403133772          | ,000             | 1,000 | ,000  | ,000  |
|                            | 403135803          | ,000             | ,000  | 1,000 | ,000  |
|                            | 404060001          | ,000             | ,000  | ,000  | 1,000 |
|                            | 404060002          | ,000             | ,000  | ,000  | ,000  |
|                            | 404310003          | ,000             | ,000  | ,000  | ,000  |
|                            | 404310004          | ,000             | ,000  | ,000  | ,000  |
|                            | 502300005          | ,000             | ,000  | ,000  | ,000  |
|                            | 502300006          | ,000             | ,000  | ,000  | ,000  |
|                            | 502300007          | ,000             | ,000  | ,000  | ,000  |
|                            | 502300214          | ,000             | ,000  | ,000  | ,000  |
|                            | 502300411          | ,000             | ,000  | ,000  | ,000  |
|                            | 502300415          | ,000             | ,000  | ,000  | ,000  |
|                            | 502300416          | ,000             | ,000  | ,000  | ,000  |
|                            | 502300811          | ,000             | ,000  | ,000  | ,000  |
|                            | 502300913          | ,000             | ,000  | ,000  | ,000  |
| sv5 kvintiler för standard | 1 tredje kvintilen |                  |       |       |       |
|                            | 2 första kvintilen |                  |       |       |       |
|                            | 3 andra kvintilen  |                  |       |       |       |
|                            | 4 fjärde kvintilen |                  |       |       |       |
|                            | 5 femte kvintilen  |                  |       |       |       |

## Categorical Variables Codings

|                            |                    | Parameter coding |       |       |       |
|----------------------------|--------------------|------------------|-------|-------|-------|
|                            |                    | (24)             | (25)  | (26)  | (27)  |
| VASTY2 (SAIR*10000)+VASTY  | 403073101          | ,000             | ,000  | ,000  | ,000  |
|                            | 403073102          | ,000             | ,000  | ,000  | ,000  |
|                            | 403073103          | ,000             | ,000  | ,000  | ,000  |
|                            | 403073202          | ,000             | ,000  | ,000  | ,000  |
|                            | 403073203          | ,000             | ,000  | ,000  | ,000  |
|                            | 403073204          | ,000             | ,000  | ,000  | ,000  |
|                            | 403073303          | ,000             | ,000  | ,000  | ,000  |
|                            | 403073651          | ,000             | ,000  | ,000  | ,000  |
|                            | 403073771          | ,000             | ,000  | ,000  | ,000  |
|                            | 403133102          | ,000             | ,000  | ,000  | ,000  |
|                            | 403133106          | ,000             | ,000  | ,000  | ,000  |
|                            | 403133107          | ,000             | ,000  | ,000  | ,000  |
|                            | 403133109          | ,000             | ,000  | ,000  | ,000  |
|                            | 403133202          | ,000             | ,000  | ,000  | ,000  |
|                            | 403133203          | ,000             | ,000  | ,000  | ,000  |
|                            | 403133204          | ,000             | ,000  | ,000  | ,000  |
|                            | 403133315          | ,000             | ,000  | ,000  | ,000  |
|                            | 403133322          | ,000             | ,000  | ,000  | ,000  |
|                            | 403133401          | ,000             | ,000  | ,000  | ,000  |
|                            | 403133402          | ,000             | ,000  | ,000  | ,000  |
|                            | 403133550          | ,000             | ,000  | ,000  | ,000  |
|                            | 403133772          | ,000             | ,000  | ,000  | ,000  |
|                            | 403135803          | ,000             | ,000  | ,000  | ,000  |
|                            | 404060001          | ,000             | ,000  | ,000  | ,000  |
|                            | 404060002          | 1,000            | ,000  | ,000  | ,000  |
|                            | 404310003          | ,000             | 1,000 | ,000  | ,000  |
|                            | 404310004          | ,000             | ,000  | 1,000 | ,000  |
|                            | 502300005          | ,000             | ,000  | ,000  | 1,000 |
|                            | 502300006          | ,000             | ,000  | ,000  | ,000  |
|                            | 502300007          | ,000             | ,000  | ,000  | ,000  |
|                            | 502300214          | ,000             | ,000  | ,000  | ,000  |
|                            | 502300411          | ,000             | ,000  | ,000  | ,000  |
|                            | 502300415          | ,000             | ,000  | ,000  | ,000  |
|                            | 502300416          | ,000             | ,000  | ,000  | ,000  |
|                            | 502300811          | ,000             | ,000  | ,000  | ,000  |
|                            | 502300913          | ,000             | ,000  | ,000  | ,000  |
| sv5 kvintiler för standard | 1 tredje kvintilen |                  |       |       |       |
|                            | 2 första kvintilen |                  |       |       |       |
|                            | 3 andra kvintilen  |                  |       |       |       |
|                            | 4 fjärde kvintilen |                  |       |       |       |
|                            | 5 femte kvintilen  |                  |       |       |       |

## Categorical Variables Codings

|                            |                    | Parameter coding |       |       |       |
|----------------------------|--------------------|------------------|-------|-------|-------|
|                            |                    | (28)             | (29)  | (30)  | (31)  |
| VASTY2 (SAIR*10000)+VASTY  | 403073101          | ,000             | ,000  | ,000  | ,000  |
|                            | 403073102          | ,000             | ,000  | ,000  | ,000  |
|                            | 403073103          | ,000             | ,000  | ,000  | ,000  |
|                            | 403073202          | ,000             | ,000  | ,000  | ,000  |
|                            | 403073203          | ,000             | ,000  | ,000  | ,000  |
|                            | 403073204          | ,000             | ,000  | ,000  | ,000  |
|                            | 403073303          | ,000             | ,000  | ,000  | ,000  |
|                            | 403073651          | ,000             | ,000  | ,000  | ,000  |
|                            | 403073771          | ,000             | ,000  | ,000  | ,000  |
|                            | 403133102          | ,000             | ,000  | ,000  | ,000  |
|                            | 403133106          | ,000             | ,000  | ,000  | ,000  |
|                            | 403133107          | ,000             | ,000  | ,000  | ,000  |
|                            | 403133109          | ,000             | ,000  | ,000  | ,000  |
|                            | 403133202          | ,000             | ,000  | ,000  | ,000  |
|                            | 403133203          | ,000             | ,000  | ,000  | ,000  |
|                            | 403133204          | ,000             | ,000  | ,000  | ,000  |
|                            | 403133315          | ,000             | ,000  | ,000  | ,000  |
|                            | 403133322          | ,000             | ,000  | ,000  | ,000  |
|                            | 403133401          | ,000             | ,000  | ,000  | ,000  |
|                            | 403133402          | ,000             | ,000  | ,000  | ,000  |
|                            | 403133550          | ,000             | ,000  | ,000  | ,000  |
|                            | 403133772          | ,000             | ,000  | ,000  | ,000  |
|                            | 403135803          | ,000             | ,000  | ,000  | ,000  |
|                            | 404060001          | ,000             | ,000  | ,000  | ,000  |
|                            | 404060002          | ,000             | ,000  | ,000  | ,000  |
|                            | 404310003          | ,000             | ,000  | ,000  | ,000  |
|                            | 404310004          | ,000             | ,000  | ,000  | ,000  |
|                            | 502300005          | ,000             | ,000  | ,000  | ,000  |
|                            | 502300006          | 1,000            | ,000  | ,000  | ,000  |
|                            | 502300007          | ,000             | 1,000 | ,000  | ,000  |
|                            | 502300214          | ,000             | ,000  | 1,000 | ,000  |
|                            | 502300411          | ,000             | ,000  | ,000  | 1,000 |
|                            | 502300415          | ,000             | ,000  | ,000  | ,000  |
|                            | 502300416          | ,000             | ,000  | ,000  | ,000  |
|                            | 502300811          | ,000             | ,000  | ,000  | ,000  |
|                            | 502300913          | ,000             | ,000  | ,000  | ,000  |
| sv5 kvintiler för standard | 1 tredje kvintilen |                  |       |       |       |
|                            | 2 första kvintilen |                  |       |       |       |
|                            | 3 andra kvintilen  |                  |       |       |       |
|                            | 4 fjärde kvintilen |                  |       |       |       |
|                            | 5 femte kvintilen  |                  |       |       |       |

## Categorical Variables Codings

|                            |                    | Parameter coding |       |       |       |
|----------------------------|--------------------|------------------|-------|-------|-------|
|                            |                    | (32)             | (33)  | (34)  | (35)  |
| VASTY2 (SAIR*10000)+VASTY  | 403073101          | ,000             | ,000  | ,000  | ,000  |
|                            | 403073102          | ,000             | ,000  | ,000  | ,000  |
|                            | 403073103          | ,000             | ,000  | ,000  | ,000  |
|                            | 403073202          | ,000             | ,000  | ,000  | ,000  |
|                            | 403073203          | ,000             | ,000  | ,000  | ,000  |
|                            | 403073204          | ,000             | ,000  | ,000  | ,000  |
|                            | 403073303          | ,000             | ,000  | ,000  | ,000  |
|                            | 403073651          | ,000             | ,000  | ,000  | ,000  |
|                            | 403073771          | ,000             | ,000  | ,000  | ,000  |
|                            | 403133102          | ,000             | ,000  | ,000  | ,000  |
|                            | 403133106          | ,000             | ,000  | ,000  | ,000  |
|                            | 403133107          | ,000             | ,000  | ,000  | ,000  |
|                            | 403133109          | ,000             | ,000  | ,000  | ,000  |
|                            | 403133202          | ,000             | ,000  | ,000  | ,000  |
|                            | 403133203          | ,000             | ,000  | ,000  | ,000  |
|                            | 403133204          | ,000             | ,000  | ,000  | ,000  |
|                            | 403133315          | ,000             | ,000  | ,000  | ,000  |
|                            | 403133322          | ,000             | ,000  | ,000  | ,000  |
|                            | 403133401          | ,000             | ,000  | ,000  | ,000  |
|                            | 403133402          | ,000             | ,000  | ,000  | ,000  |
|                            | 403133550          | ,000             | ,000  | ,000  | ,000  |
|                            | 403133772          | ,000             | ,000  | ,000  | ,000  |
|                            | 403135803          | ,000             | ,000  | ,000  | ,000  |
|                            | 404060001          | ,000             | ,000  | ,000  | ,000  |
|                            | 404060002          | ,000             | ,000  | ,000  | ,000  |
|                            | 404310003          | ,000             | ,000  | ,000  | ,000  |
|                            | 404310004          | ,000             | ,000  | ,000  | ,000  |
|                            | 502300005          | ,000             | ,000  | ,000  | ,000  |
|                            | 502300006          | ,000             | ,000  | ,000  | ,000  |
|                            | 502300007          | ,000             | ,000  | ,000  | ,000  |
|                            | 502300214          | ,000             | ,000  | ,000  | ,000  |
|                            | 502300411          | ,000             | ,000  | ,000  | ,000  |
|                            | 502300415          | 1,000            | ,000  | ,000  | ,000  |
|                            | 502300416          | ,000             | 1,000 | ,000  | ,000  |
|                            | 502300811          | ,000             | ,000  | 1,000 | ,000  |
|                            | 502300913          | ,000             | ,000  | ,000  | 1,000 |
| sv5 kvintiler för standard | 1 tredje kvintilen |                  |       |       |       |
|                            | 2 första kvintilen |                  |       |       |       |
|                            | 3 andra kvintilen  |                  |       |       |       |
|                            | 4 fjärde kvintilen |                  |       |       |       |
|                            | 5 femte kvintilen  |                  |       |       |       |

## Block 0: Beginning Block

Classification Table<sup>a,b</sup>

| Observed           |                             | Predicted                   |                      |   |
|--------------------|-----------------------------|-----------------------------|----------------------|---|
|                    |                             | dod01 dödsfall ja eller nej |                      |   |
|                    |                             | 0 inget dödsfall            | 1 minst ett dödsfall |   |
| Step 0             | dod01 dödsfall ja eller nej | 0 inget dödsfall            | 11839                | 0 |
|                    |                             | 1 minst ett dödsfall        | 636                  | 0 |
| Overall Percentage |                             |                             |                      |   |

Classification Table<sup>a,b</sup>

| Observed           |                             | Predicted            |       |
|--------------------|-----------------------------|----------------------|-------|
|                    |                             | Percentage Correct   |       |
| Step 0             | dod01 dödsfall ja eller nej | 0 inget dödsfall     | 100,0 |
|                    |                             | 1 minst ett dödsfall | ,0    |
| Overall Percentage |                             |                      | 94,9  |

a. Constant is included in the model.

b. The cut value is ,500

Variables in the Equation

|                 | B      | S.E. | Wald     | df | Sig. | Exp(B) |
|-----------------|--------|------|----------|----|------|--------|
| Step 0 Constant | -2,924 | ,041 | 5160,279 | 1  | ,000 | ,054   |



## Variables not in the Equation

|        |                    |            | Score   | df | Sig. |
|--------|--------------------|------------|---------|----|------|
| Step 0 | Variables          | sv5        | 81,660  | 4  | ,000 |
|        |                    | sv5(1)     | 74,755  | 1  | ,000 |
|        |                    | sv5(2)     | ,547    | 1  | ,460 |
|        |                    | sv5(3)     | 22,471  | 1  | ,000 |
|        |                    | sv5(4)     | 3,412   | 1  | ,065 |
|        |                    | VASTY2     | 635,545 | 35 | ,000 |
|        |                    | VASTY2(1)  | 2,519   | 1  | ,113 |
|        |                    | VASTY2(2)  | 6,299   | 1  | ,012 |
|        |                    | VASTY2(3)  | 8,957   | 1  | ,003 |
|        |                    | VASTY2(4)  | ,151    | 1  | ,698 |
|        |                    | VASTY2(5)  | 7,537   | 1  | ,006 |
|        |                    | VASTY2(6)  | 20,142  | 1  | ,000 |
|        |                    | VASTY2(7)  | 127,387 | 1  | ,000 |
|        |                    | VASTY2(8)  | 8,957   | 1  | ,003 |
|        |                    | VASTY2(9)  | ,163    | 1  | ,687 |
|        |                    | VASTY2(10) | 7,570   | 1  | ,006 |
|        |                    | VASTY2(11) | ,113    | 1  | ,737 |
|        |                    | VASTY2(12) | 47,021  | 1  | ,000 |
|        |                    | VASTY2(13) | 90,515  | 1  | ,000 |
|        |                    | VASTY2(14) | 7,570   | 1  | ,006 |
|        |                    | VASTY2(15) | ,151    | 1  | ,698 |
|        |                    | VASTY2(16) | 4,298   | 1  | ,038 |
|        |                    | VASTY2(17) | 20,199  | 1  | ,000 |
|        |                    | VASTY2(18) | 17,916  | 1  | ,000 |
|        |                    | VASTY2(19) | 18,086  | 1  | ,000 |
|        |                    | VASTY2(20) | 10,563  | 1  | ,001 |
|        |                    | VASTY2(21) | 1,696   | 1  | ,193 |
|        |                    | VASTY2(22) | 26,693  | 1  | ,000 |
|        |                    | VASTY2(23) | 1,125   | 1  | ,289 |
|        |                    | VASTY2(24) | 72,662  | 1  | ,000 |
|        |                    | VASTY2(25) | 2,477   | 1  | ,116 |
|        |                    | VASTY2(26) | 16,006  | 1  | ,000 |
|        |                    | VASTY2(27) | 20,256  | 1  | ,000 |
|        |                    | VASTY2(28) | 12,309  | 1  | ,000 |
|        |                    | VASTY2(29) | 20,256  | 1  | ,000 |
|        |                    | VASTY2(30) | 1,263   | 1  | ,261 |
|        |                    | VASTY2(31) | 20,256  | 1  | ,000 |
|        |                    | VASTY2(32) | 15,810  | 1  | ,000 |
|        |                    | VASTY2(33) | 17,973  | 1  | ,000 |
|        |                    | VASTY2(34) | ,693    | 1  | ,405 |
|        |                    | VASTY2(35) | 17,360  | 1  | ,000 |
|        | Overall Statistics |            | 643,317 | 39 | ,000 |

**Block 1: Method = Enter****Omnibus Tests of Model Coefficients**

|        |       | Chi-square | df | Sig. |
|--------|-------|------------|----|------|
| Step 1 | Step  | 709,941    | 39 | ,000 |
|        | Block | 709,941    | 39 | ,000 |
|        | Model | 709,941    | 39 | ,000 |

**Model Summary**

| Step | -2 Log likelihood     | Cox & Snell R Square | Nagelkerke R Square |
|------|-----------------------|----------------------|---------------------|
| 1    | 4314,902 <sup>a</sup> | ,055                 | ,167                |

a. Estimation terminated at iteration number 20 because maximum iterations has been reached. Final solution cannot be found.

**Classification Table<sup>a</sup>**

| Observed           |                             | Predicted                   |                      |   |
|--------------------|-----------------------------|-----------------------------|----------------------|---|
|                    |                             | dod01 dödsfall ja eller nej |                      |   |
|                    |                             | 0 inget dödsfall            | 1 minst ett dödsfall |   |
| Step 1             | dod01 dödsfall ja eller nej | 0 inget dödsfall            | 11839                | 0 |
|                    |                             | 1 minst ett dödsfall        | 636                  | 0 |
| Overall Percentage |                             |                             |                      |   |

**Classification Table<sup>a</sup>**

| Observed           |                             | Predicted            |       |
|--------------------|-----------------------------|----------------------|-------|
|                    |                             | Percentage Correct   |       |
| Step 1             | dod01 dödsfall ja eller nej | 0 inget dödsfall     | 100,0 |
|                    |                             | 1 minst ett dödsfall | ,0    |
| Overall Percentage |                             |                      | 94,9  |

a. The cut value is ,500

## Variables in the Equation

|                     |            | B       | S.E.     | Wald    | df | Sig. | Exp(B) |
|---------------------|------------|---------|----------|---------|----|------|--------|
| Step 1 <sup>a</sup> | sv5        |         |          | 7,325   | 4  | ,120 |        |
|                     | sv5(1)     | -,200   | ,152     | 1,738   | 1  | ,187 | ,819   |
|                     | sv5(2)     | -,073   | ,144     | ,257    | 1  | ,612 | ,929   |
|                     | sv5(3)     | ,089    | ,129     | ,476    | 1  | ,490 | 1,093  |
|                     | sv5(4)     | ,225    | ,146     | 2,397   | 1  | ,122 | 1,253  |
|                     | VASTY2     |         |          | 215,509 | 35 | ,000 |        |
|                     | VASTY2(1)  | ,573    | ,344     | 2,776   | 1  | ,096 | 1,773  |
|                     | VASTY2(2)  | ,629    | ,341     | 3,407   | 1  | ,065 | 1,875  |
|                     | VASTY2(3)  | ,877    | ,331     | 7,006   | 1  | ,008 | 2,404  |
|                     | VASTY2(4)  | ,235    | ,369     | ,405    | 1  | ,524 | 1,265  |
|                     | VASTY2(5)  | -,677   | ,496     | 1,867   | 1  | ,172 | ,508   |
|                     | VASTY2(6)  | -18,169 | 2105,569 | ,000    | 1  | ,993 | ,000   |
|                     | VASTY2(7)  | 1,733   | ,305     | 32,197  | 1  | ,000 | 5,659  |
|                     | VASTY2(8)  | ,908    | ,332     | 7,458   | 1  | ,006 | 2,479  |
|                     | VASTY2(9)  | ,388    | ,361     | 1,159   | 1  | ,282 | 1,475  |
|                     | VASTY2(10) | ,640    | ,341     | 3,517   | 1  | ,061 | 1,896  |
|                     | VASTY2(11) | ,375    | ,357     | 1,107   | 1  | ,293 | 1,456  |
|                     | VASTY2(12) | 1,184   | ,319     | 13,807  | 1  | ,000 | 3,266  |
|                     | VASTY2(13) | 1,379   | ,318     | 18,824  | 1  | ,000 | 3,970  |
|                     | VASTY2(14) | ,711    | ,336     | 4,486   | 1  | ,034 | 2,037  |
|                     | VASTY2(15) | ,067    | ,374     | ,032    | 1  | ,858 | 1,069  |
|                     | VASTY2(16) | -,870   | ,644     | 1,822   | 1  | ,177 | ,419   |
|                     | VASTY2(17) | -17,930 | 2101,497 | ,000    | 1  | ,993 | ,000   |
|                     | VASTY2(18) | -2,472  | 1,044    | 5,611   | 1  | ,018 | ,084   |
|                     | VASTY2(19) | -2,476  | 1,044    | 5,626   | 1  | ,018 | ,084   |
|                     | VASTY2(20) | -1,467  | ,643     | 5,197   | 1  | ,023 | ,231   |
|                     | VASTY2(21) | ,613    | ,346     | 3,145   | 1  | ,076 | 1,846  |
|                     | VASTY2(22) | 1,123   | ,320     | 12,309  | 1  | ,000 | 3,074  |
|                     | VASTY2(23) | ,551    | ,348     | 2,511   | 1  | ,113 | 1,735  |
|                     | VASTY2(24) | 1,407   | ,311     | 20,437  | 1  | ,000 | 4,083  |
|                     | VASTY2(25) | -,154   | ,436     | ,125    | 1  | ,723 | ,857   |
|                     | VASTY2(26) | -17,995 | 2353,519 | ,000    | 1  | ,994 | ,000   |
|                     | VASTY2(27) | -18,092 | 2098,489 | ,000    | 1  | ,993 | ,000   |
|                     | VASTY2(28) | -18,197 | 2679,174 | ,000    | 1  | ,995 | ,000   |
|                     | VASTY2(29) | -18,205 | 2100,873 | ,000    | 1  | ,993 | ,000   |
|                     | VASTY2(30) | ,068    | ,387     | ,031    | 1  | ,860 | 1,071  |
|                     | VASTY2(31) | -17,813 | 2100,234 | ,000    | 1  | ,993 | ,000   |
|                     | VASTY2(32) | -1,771  | ,767     | 5,323   | 1  | ,021 | ,170   |
|                     | VASTY2(33) | -2,471  | 1,044    | 5,601   | 1  | ,018 | ,085   |
|                     | VASTY2(34) | ,480    | ,350     | 1,879   | 1  | ,170 | 1,617  |
|                     | VASTY2(35) | -17,988 | 2261,427 | ,000    | 1  | ,994 | ,000   |
|                     | Constant   | -3,221  | ,284     | 128,279 | 1  | ,000 | ,040   |

## Variables in the Equation

|                     |            | 95% C.I. for EXP(B) |        |
|---------------------|------------|---------------------|--------|
|                     |            | Lower               | Upper  |
| Step 1 <sup>a</sup> | sv5        |                     |        |
|                     | sv5(1)     | ,608                | 1,102  |
|                     | sv5(2)     | ,700                | 1,233  |
|                     | sv5(3)     | ,849                | 1,408  |
|                     | sv5(4)     | ,942                | 1,666  |
|                     | VASTY2     |                     |        |
|                     | VASTY2(1)  | ,904                | 3,477  |
|                     | VASTY2(2)  | ,962                | 3,656  |
|                     | VASTY2(3)  | 1,256               | 4,602  |
|                     | VASTY2(4)  | ,614                | 2,608  |
|                     | VASTY2(5)  | ,192                | 1,342  |
|                     | VASTY2(6)  | ,000                | .      |
|                     | VASTY2(7)  | 3,110               | 10,297 |
|                     | VASTY2(8)  | 1,292               | 4,756  |
|                     | VASTY2(9)  | ,727                | 2,990  |
|                     | VASTY2(10) | ,972                | 3,701  |
|                     | VASTY2(11) | ,723                | 2,929  |
|                     | VASTY2(12) | 1,749               | 6,098  |
|                     | VASTY2(13) | 2,129               | 7,400  |
|                     | VASTY2(14) | 1,054               | 3,934  |
|                     | VASTY2(15) | ,514                | 2,226  |
|                     | VASTY2(16) | ,119                | 1,482  |
|                     | VASTY2(17) | ,000                | .      |
|                     | VASTY2(18) | ,011                | ,653   |
|                     | VASTY2(19) | ,011                | ,650   |
|                     | VASTY2(20) | ,065                | ,814   |
|                     | VASTY2(21) | ,938                | 3,633  |
|                     | VASTY2(22) | 1,642               | 5,757  |
|                     | VASTY2(23) | ,878                | 3,431  |
|                     | VASTY2(24) | 2,219               | 7,513  |
|                     | VASTY2(25) | ,365                | 2,014  |
|                     | VASTY2(26) | ,000                | .      |
|                     | VASTY2(27) | ,000                | .      |
|                     | VASTY2(28) | ,000                | .      |
|                     | VASTY2(29) | ,000                | .      |
|                     | VASTY2(30) | ,502                | 2,285  |
|                     | VASTY2(31) | ,000                | .      |
|                     | VASTY2(32) | ,038                | ,766   |
|                     | VASTY2(33) | ,011                | ,654   |
|                     | VASTY2(34) | ,813                | 3,212  |
|                     | VASTY2(35) | ,000                | .      |
|                     | Constant   |                     |        |

a. Variable(s) entered on step 1: sv5, VASTY2.

```
LOGISTIC REGRESSION VARIABLES dod01
/METHOD=ENTER sv7 VASTY2
/CONTRAST (sv7)=Indicator(1)
/CONTRAST (VASTY2)=Indicator(1)
/PRINT=CI(95)
/CRITERIA=PIN(0.05) POUT(0.10) ITERATE(20) CUT(0.5).
```

## Logistic Regression

[DataSet6] C:\cWordjan\Rafaela\_VCS\alla\_tillsammans\abo\_bjo\_vasa\_v1.sav

### Case Processing Summary

| Unweighted Cases <sup>a</sup> |                      | N     | Percent |
|-------------------------------|----------------------|-------|---------|
| Selected Cases                | Included in Analysis | 12475 | 100,0   |
|                               | Missing Cases        | 0     | ,0      |
|                               | Total                | 12475 | 100,0   |
| Unselected Cases              |                      | 0     | ,0      |
| Total                         |                      | 12475 | 100,0   |

a. If weight is in effect, see classification table for the total number of cases.

### Dependent Variable Encoding

| Original Value       | Internal Value |
|----------------------|----------------|
| 0 inget dödsfall     | 0              |
| 1 minst ett dödsfall | 1              |

## Categorical Variables Codings

|                                                   | Frequency | Parameter coding |       |       |
|---------------------------------------------------|-----------|------------------|-------|-------|
|                                                   |           | (1)              | (2)   | (3)   |
| VASTY2 (SAIR*10000)+VASTY 403073101               | 365       | ,000             | ,000  | ,000  |
| 403073102                                         | 362       | 1,000            | ,000  | ,000  |
| 403073103                                         | 365       | ,000             | 1,000 | ,000  |
| 403073202                                         | 365       | ,000             | ,000  | 1,000 |
| 403073203                                         | 365       | ,000             | ,000  | ,000  |
| 403073204                                         | 330       | ,000             | ,000  | ,000  |
| 403073303                                         | 364       | ,000             | ,000  | ,000  |
| 403073651                                         | 362       | ,000             | ,000  | ,000  |
| 403073771                                         | 365       | ,000             | ,000  | ,000  |
| 403133102                                         | 341       | ,000             | ,000  | ,000  |
| 403133106                                         | 365       | ,000             | ,000  | ,000  |
| 403133107                                         | 365       | ,000             | ,000  | ,000  |
| 403133109                                         | 365       | ,000             | ,000  | ,000  |
| 403133202                                         | 365       | ,000             | ,000  | ,000  |
| 403133203                                         | 365       | ,000             | ,000  | ,000  |
| 403133204                                         | 365       | ,000             | ,000  | ,000  |
| 403133315                                         | 177       | ,000             | ,000  | ,000  |
| 403133322                                         | 365       | ,000             | ,000  | ,000  |
| 403133401                                         | 362       | ,000             | ,000  | ,000  |
| 403133402                                         | 365       | ,000             | ,000  | ,000  |
| 403133550                                         | 298       | ,000             | ,000  | ,000  |
| 403133772                                         | 365       | ,000             | ,000  | ,000  |
| 403135803                                         | 365       | ,000             | ,000  | ,000  |
| 404060001                                         | 365       | ,000             | ,000  | ,000  |
| 404060002                                         | 366       | ,000             | ,000  | ,000  |
| 404310003                                         | 291       | ,000             | ,000  | ,000  |
| 404310004                                         | 291       | ,000             | ,000  | ,000  |
| 502300005                                         | 366       | ,000             | ,000  | ,000  |
| 502300006                                         | 225       | ,000             | ,000  | ,000  |
| 502300007                                         | 366       | ,000             | ,000  | ,000  |
| 502300214                                         | 366       | ,000             | ,000  | ,000  |
| 502300411                                         | 366       | ,000             | ,000  | ,000  |
| 502300415                                         | 360       | ,000             | ,000  | ,000  |
| 502300416                                         | 363       | ,000             | ,000  | ,000  |
| 502300811                                         | 364       | ,000             | ,000  | ,000  |
| 502300913                                         | 315       | ,000             | ,000  | ,000  |
| sv7 sjättedelar för standard 1 fjärde sjundedelen | 1423      | ,000             | ,000  | ,000  |
| 2 första sjundedelen                              | 3031      | 1,000            | ,000  | ,000  |

## Categorical Variables Codings

|                              |                      | Parameter coding |       |       |       |
|------------------------------|----------------------|------------------|-------|-------|-------|
|                              |                      | (4)              | (5)   | (6)   | (7)   |
| VASTY2 (SAIR*10000)+VASTY    | 403073101            | ,000             | ,000  | ,000  | ,000  |
|                              | 403073102            | ,000             | ,000  | ,000  | ,000  |
|                              | 403073103            | ,000             | ,000  | ,000  | ,000  |
|                              | 403073202            | ,000             | ,000  | ,000  | ,000  |
|                              | 403073203            | 1,000            | ,000  | ,000  | ,000  |
|                              | 403073204            | ,000             | 1,000 | ,000  | ,000  |
|                              | 403073303            | ,000             | ,000  | 1,000 | ,000  |
|                              | 403073651            | ,000             | ,000  | ,000  | 1,000 |
|                              | 403073771            | ,000             | ,000  | ,000  | ,000  |
|                              | 403133102            | ,000             | ,000  | ,000  | ,000  |
|                              | 403133106            | ,000             | ,000  | ,000  | ,000  |
|                              | 403133107            | ,000             | ,000  | ,000  | ,000  |
|                              | 403133109            | ,000             | ,000  | ,000  | ,000  |
|                              | 403133202            | ,000             | ,000  | ,000  | ,000  |
|                              | 403133203            | ,000             | ,000  | ,000  | ,000  |
|                              | 403133204            | ,000             | ,000  | ,000  | ,000  |
|                              | 403133315            | ,000             | ,000  | ,000  | ,000  |
|                              | 403133322            | ,000             | ,000  | ,000  | ,000  |
|                              | 403133401            | ,000             | ,000  | ,000  | ,000  |
|                              | 403133402            | ,000             | ,000  | ,000  | ,000  |
|                              | 403133550            | ,000             | ,000  | ,000  | ,000  |
|                              | 403133772            | ,000             | ,000  | ,000  | ,000  |
|                              | 403135803            | ,000             | ,000  | ,000  | ,000  |
|                              | 404060001            | ,000             | ,000  | ,000  | ,000  |
|                              | 404060002            | ,000             | ,000  | ,000  | ,000  |
|                              | 404310003            | ,000             | ,000  | ,000  | ,000  |
|                              | 404310004            | ,000             | ,000  | ,000  | ,000  |
|                              | 502300005            | ,000             | ,000  | ,000  | ,000  |
|                              | 502300006            | ,000             | ,000  | ,000  | ,000  |
|                              | 502300007            | ,000             | ,000  | ,000  | ,000  |
|                              | 502300214            | ,000             | ,000  | ,000  | ,000  |
|                              | 502300411            | ,000             | ,000  | ,000  | ,000  |
|                              | 502300415            | ,000             | ,000  | ,000  | ,000  |
|                              | 502300416            | ,000             | ,000  | ,000  | ,000  |
|                              | 502300811            | ,000             | ,000  | ,000  | ,000  |
|                              | 502300913            | ,000             | ,000  | ,000  | ,000  |
| sv7 sjättedelar för standard | 1 fjärde sjundedelen | ,000             | ,000  | ,000  | ,000  |
|                              | 2 första sjundedelen | ,000             | ,000  | ,000  | ,000  |

## Categorical Variables Codings

|                              |                      | Parameter coding |       |       |       |
|------------------------------|----------------------|------------------|-------|-------|-------|
|                              |                      | (8)              | (9)   | (10)  | (11)  |
| VASTY2 (SAIR*10000)+VASTY    | 403073101            | ,000             | ,000  | ,000  | ,000  |
|                              | 403073102            | ,000             | ,000  | ,000  | ,000  |
|                              | 403073103            | ,000             | ,000  | ,000  | ,000  |
|                              | 403073202            | ,000             | ,000  | ,000  | ,000  |
|                              | 403073203            | ,000             | ,000  | ,000  | ,000  |
|                              | 403073204            | ,000             | ,000  | ,000  | ,000  |
|                              | 403073303            | ,000             | ,000  | ,000  | ,000  |
|                              | 403073651            | ,000             | ,000  | ,000  | ,000  |
|                              | 403073771            | 1,000            | ,000  | ,000  | ,000  |
|                              | 403133102            | ,000             | 1,000 | ,000  | ,000  |
|                              | 403133106            | ,000             | ,000  | 1,000 | ,000  |
|                              | 403133107            | ,000             | ,000  | ,000  | 1,000 |
|                              | 403133109            | ,000             | ,000  | ,000  | ,000  |
|                              | 403133202            | ,000             | ,000  | ,000  | ,000  |
|                              | 403133203            | ,000             | ,000  | ,000  | ,000  |
|                              | 403133204            | ,000             | ,000  | ,000  | ,000  |
|                              | 403133315            | ,000             | ,000  | ,000  | ,000  |
|                              | 403133322            | ,000             | ,000  | ,000  | ,000  |
|                              | 403133401            | ,000             | ,000  | ,000  | ,000  |
|                              | 403133402            | ,000             | ,000  | ,000  | ,000  |
|                              | 403133550            | ,000             | ,000  | ,000  | ,000  |
|                              | 403133772            | ,000             | ,000  | ,000  | ,000  |
|                              | 403135803            | ,000             | ,000  | ,000  | ,000  |
|                              | 404060001            | ,000             | ,000  | ,000  | ,000  |
|                              | 404060002            | ,000             | ,000  | ,000  | ,000  |
|                              | 404310003            | ,000             | ,000  | ,000  | ,000  |
|                              | 404310004            | ,000             | ,000  | ,000  | ,000  |
|                              | 502300005            | ,000             | ,000  | ,000  | ,000  |
|                              | 502300006            | ,000             | ,000  | ,000  | ,000  |
|                              | 502300007            | ,000             | ,000  | ,000  | ,000  |
|                              | 502300214            | ,000             | ,000  | ,000  | ,000  |
|                              | 502300411            | ,000             | ,000  | ,000  | ,000  |
|                              | 502300415            | ,000             | ,000  | ,000  | ,000  |
|                              | 502300416            | ,000             | ,000  | ,000  | ,000  |
|                              | 502300811            | ,000             | ,000  | ,000  | ,000  |
|                              | 502300913            | ,000             | ,000  | ,000  | ,000  |
| sv7 sjättedelar för standard | 1 fjärde sjundedelen |                  |       |       |       |
|                              | 2 första sjundedelen |                  |       |       |       |



## Categorical Variables Codings

|                              |                      | Parameter coding |       |       |       |
|------------------------------|----------------------|------------------|-------|-------|-------|
|                              |                      | (12)             | (13)  | (14)  | (15)  |
| VASTY2 (SAIR*10000)+VASTY    | 403073101            | ,000             | ,000  | ,000  | ,000  |
|                              | 403073102            | ,000             | ,000  | ,000  | ,000  |
|                              | 403073103            | ,000             | ,000  | ,000  | ,000  |
|                              | 403073202            | ,000             | ,000  | ,000  | ,000  |
|                              | 403073203            | ,000             | ,000  | ,000  | ,000  |
|                              | 403073204            | ,000             | ,000  | ,000  | ,000  |
|                              | 403073303            | ,000             | ,000  | ,000  | ,000  |
|                              | 403073651            | ,000             | ,000  | ,000  | ,000  |
|                              | 403073771            | ,000             | ,000  | ,000  | ,000  |
|                              | 403133102            | ,000             | ,000  | ,000  | ,000  |
|                              | 403133106            | ,000             | ,000  | ,000  | ,000  |
|                              | 403133107            | ,000             | ,000  | ,000  | ,000  |
|                              | 403133109            | 1,000            | ,000  | ,000  | ,000  |
|                              | 403133202            | ,000             | 1,000 | ,000  | ,000  |
|                              | 403133203            | ,000             | ,000  | 1,000 | ,000  |
|                              | 403133204            | ,000             | ,000  | ,000  | 1,000 |
|                              | 403133315            | ,000             | ,000  | ,000  | ,000  |
|                              | 403133322            | ,000             | ,000  | ,000  | ,000  |
|                              | 403133401            | ,000             | ,000  | ,000  | ,000  |
|                              | 403133402            | ,000             | ,000  | ,000  | ,000  |
|                              | 403133550            | ,000             | ,000  | ,000  | ,000  |
|                              | 403133772            | ,000             | ,000  | ,000  | ,000  |
|                              | 403135803            | ,000             | ,000  | ,000  | ,000  |
|                              | 404060001            | ,000             | ,000  | ,000  | ,000  |
|                              | 404060002            | ,000             | ,000  | ,000  | ,000  |
|                              | 404310003            | ,000             | ,000  | ,000  | ,000  |
|                              | 404310004            | ,000             | ,000  | ,000  | ,000  |
|                              | 502300005            | ,000             | ,000  | ,000  | ,000  |
|                              | 502300006            | ,000             | ,000  | ,000  | ,000  |
|                              | 502300007            | ,000             | ,000  | ,000  | ,000  |
|                              | 502300214            | ,000             | ,000  | ,000  | ,000  |
|                              | 502300411            | ,000             | ,000  | ,000  | ,000  |
|                              | 502300415            | ,000             | ,000  | ,000  | ,000  |
|                              | 502300416            | ,000             | ,000  | ,000  | ,000  |
|                              | 502300811            | ,000             | ,000  | ,000  | ,000  |
|                              | 502300913            | ,000             | ,000  | ,000  | ,000  |
| sv7 sjättedelar för standard | 1 fjärde sjundedelen |                  |       |       |       |
|                              | 2 första sjundedelen |                  |       |       |       |

## Categorical Variables Codings

|                              |                      | Parameter coding |       |       |       |
|------------------------------|----------------------|------------------|-------|-------|-------|
|                              |                      | (16)             | (17)  | (18)  | (19)  |
| VASTY2 (SAIR*10000)+VASTY    | 403073101            | ,000             | ,000  | ,000  | ,000  |
|                              | 403073102            | ,000             | ,000  | ,000  | ,000  |
|                              | 403073103            | ,000             | ,000  | ,000  | ,000  |
|                              | 403073202            | ,000             | ,000  | ,000  | ,000  |
|                              | 403073203            | ,000             | ,000  | ,000  | ,000  |
|                              | 403073204            | ,000             | ,000  | ,000  | ,000  |
|                              | 403073303            | ,000             | ,000  | ,000  | ,000  |
|                              | 403073651            | ,000             | ,000  | ,000  | ,000  |
|                              | 403073771            | ,000             | ,000  | ,000  | ,000  |
|                              | 403133102            | ,000             | ,000  | ,000  | ,000  |
|                              | 403133106            | ,000             | ,000  | ,000  | ,000  |
|                              | 403133107            | ,000             | ,000  | ,000  | ,000  |
|                              | 403133109            | ,000             | ,000  | ,000  | ,000  |
|                              | 403133202            | ,000             | ,000  | ,000  | ,000  |
|                              | 403133203            | ,000             | ,000  | ,000  | ,000  |
|                              | 403133204            | ,000             | ,000  | ,000  | ,000  |
|                              | 403133315            | 1,000            | ,000  | ,000  | ,000  |
|                              | 403133322            | ,000             | 1,000 | ,000  | ,000  |
|                              | 403133401            | ,000             | ,000  | 1,000 | ,000  |
|                              | 403133402            | ,000             | ,000  | ,000  | 1,000 |
|                              | 403133550            | ,000             | ,000  | ,000  | ,000  |
|                              | 403133772            | ,000             | ,000  | ,000  | ,000  |
|                              | 403135803            | ,000             | ,000  | ,000  | ,000  |
|                              | 404060001            | ,000             | ,000  | ,000  | ,000  |
|                              | 404060002            | ,000             | ,000  | ,000  | ,000  |
|                              | 404310003            | ,000             | ,000  | ,000  | ,000  |
|                              | 404310004            | ,000             | ,000  | ,000  | ,000  |
|                              | 502300005            | ,000             | ,000  | ,000  | ,000  |
|                              | 502300006            | ,000             | ,000  | ,000  | ,000  |
|                              | 502300007            | ,000             | ,000  | ,000  | ,000  |
|                              | 502300214            | ,000             | ,000  | ,000  | ,000  |
|                              | 502300411            | ,000             | ,000  | ,000  | ,000  |
|                              | 502300415            | ,000             | ,000  | ,000  | ,000  |
|                              | 502300416            | ,000             | ,000  | ,000  | ,000  |
|                              | 502300811            | ,000             | ,000  | ,000  | ,000  |
|                              | 502300913            | ,000             | ,000  | ,000  | ,000  |
| sv7 sjättedelar för standard | 1 fjärde sjundedelen |                  |       |       |       |
|                              | 2 första sjundedelen |                  |       |       |       |

## Categorical Variables Codings

|                              |                      | Parameter coding |       |       |       |
|------------------------------|----------------------|------------------|-------|-------|-------|
|                              |                      | (20)             | (21)  | (22)  | (23)  |
| VASTY2 (SAIR*10000)+VASTY    | 403073101            | ,000             | ,000  | ,000  | ,000  |
|                              | 403073102            | ,000             | ,000  | ,000  | ,000  |
|                              | 403073103            | ,000             | ,000  | ,000  | ,000  |
|                              | 403073202            | ,000             | ,000  | ,000  | ,000  |
|                              | 403073203            | ,000             | ,000  | ,000  | ,000  |
|                              | 403073204            | ,000             | ,000  | ,000  | ,000  |
|                              | 403073303            | ,000             | ,000  | ,000  | ,000  |
|                              | 403073651            | ,000             | ,000  | ,000  | ,000  |
|                              | 403073771            | ,000             | ,000  | ,000  | ,000  |
|                              | 403133102            | ,000             | ,000  | ,000  | ,000  |
|                              | 403133106            | ,000             | ,000  | ,000  | ,000  |
|                              | 403133107            | ,000             | ,000  | ,000  | ,000  |
|                              | 403133109            | ,000             | ,000  | ,000  | ,000  |
|                              | 403133202            | ,000             | ,000  | ,000  | ,000  |
|                              | 403133203            | ,000             | ,000  | ,000  | ,000  |
|                              | 403133204            | ,000             | ,000  | ,000  | ,000  |
|                              | 403133315            | ,000             | ,000  | ,000  | ,000  |
|                              | 403133322            | ,000             | ,000  | ,000  | ,000  |
|                              | 403133401            | ,000             | ,000  | ,000  | ,000  |
|                              | 403133402            | ,000             | ,000  | ,000  | ,000  |
|                              | 403133550            | 1,000            | ,000  | ,000  | ,000  |
|                              | 403133772            | ,000             | 1,000 | ,000  | ,000  |
|                              | 403135803            | ,000             | ,000  | 1,000 | ,000  |
|                              | 404060001            | ,000             | ,000  | ,000  | 1,000 |
|                              | 404060002            | ,000             | ,000  | ,000  | ,000  |
|                              | 404310003            | ,000             | ,000  | ,000  | ,000  |
|                              | 404310004            | ,000             | ,000  | ,000  | ,000  |
|                              | 502300005            | ,000             | ,000  | ,000  | ,000  |
|                              | 502300006            | ,000             | ,000  | ,000  | ,000  |
|                              | 502300007            | ,000             | ,000  | ,000  | ,000  |
|                              | 502300214            | ,000             | ,000  | ,000  | ,000  |
|                              | 502300411            | ,000             | ,000  | ,000  | ,000  |
|                              | 502300415            | ,000             | ,000  | ,000  | ,000  |
|                              | 502300416            | ,000             | ,000  | ,000  | ,000  |
|                              | 502300811            | ,000             | ,000  | ,000  | ,000  |
|                              | 502300913            | ,000             | ,000  | ,000  | ,000  |
| sv7 sjättedelar för standard | 1 fjärde sjundedelen |                  |       |       |       |
|                              | 2 första sjundedelen |                  |       |       |       |

## Categorical Variables Codings

|                              |                      | Parameter coding |       |       |       |
|------------------------------|----------------------|------------------|-------|-------|-------|
|                              |                      | (24)             | (25)  | (26)  | (27)  |
| VASTY2 (SAIR*10000)+VASTY    | 403073101            | ,000             | ,000  | ,000  | ,000  |
|                              | 403073102            | ,000             | ,000  | ,000  | ,000  |
|                              | 403073103            | ,000             | ,000  | ,000  | ,000  |
|                              | 403073202            | ,000             | ,000  | ,000  | ,000  |
|                              | 403073203            | ,000             | ,000  | ,000  | ,000  |
|                              | 403073204            | ,000             | ,000  | ,000  | ,000  |
|                              | 403073303            | ,000             | ,000  | ,000  | ,000  |
|                              | 403073651            | ,000             | ,000  | ,000  | ,000  |
|                              | 403073771            | ,000             | ,000  | ,000  | ,000  |
|                              | 403133102            | ,000             | ,000  | ,000  | ,000  |
|                              | 403133106            | ,000             | ,000  | ,000  | ,000  |
|                              | 403133107            | ,000             | ,000  | ,000  | ,000  |
|                              | 403133109            | ,000             | ,000  | ,000  | ,000  |
|                              | 403133202            | ,000             | ,000  | ,000  | ,000  |
|                              | 403133203            | ,000             | ,000  | ,000  | ,000  |
|                              | 403133204            | ,000             | ,000  | ,000  | ,000  |
|                              | 403133315            | ,000             | ,000  | ,000  | ,000  |
|                              | 403133322            | ,000             | ,000  | ,000  | ,000  |
|                              | 403133401            | ,000             | ,000  | ,000  | ,000  |
|                              | 403133402            | ,000             | ,000  | ,000  | ,000  |
|                              | 403133550            | ,000             | ,000  | ,000  | ,000  |
|                              | 403133772            | ,000             | ,000  | ,000  | ,000  |
|                              | 403135803            | ,000             | ,000  | ,000  | ,000  |
|                              | 404060001            | ,000             | ,000  | ,000  | ,000  |
|                              | 404060002            | 1,000            | ,000  | ,000  | ,000  |
|                              | 404310003            | ,000             | 1,000 | ,000  | ,000  |
|                              | 404310004            | ,000             | ,000  | 1,000 | ,000  |
|                              | 502300005            | ,000             | ,000  | ,000  | 1,000 |
|                              | 502300006            | ,000             | ,000  | ,000  | ,000  |
|                              | 502300007            | ,000             | ,000  | ,000  | ,000  |
|                              | 502300214            | ,000             | ,000  | ,000  | ,000  |
|                              | 502300411            | ,000             | ,000  | ,000  | ,000  |
|                              | 502300415            | ,000             | ,000  | ,000  | ,000  |
|                              | 502300416            | ,000             | ,000  | ,000  | ,000  |
|                              | 502300811            | ,000             | ,000  | ,000  | ,000  |
|                              | 502300913            | ,000             | ,000  | ,000  | ,000  |
| sv7 sjättedelar för standard | 1 fjärde sjundedelen |                  |       |       |       |
|                              | 2 första sjundedelen |                  |       |       |       |

## Categorical Variables Codings

|                              |                      | Parameter coding |       |       |       |
|------------------------------|----------------------|------------------|-------|-------|-------|
|                              |                      | (28)             | (29)  | (30)  | (31)  |
| VASTY2 (SAIR*10000)+VASTY    | 403073101            | ,000             | ,000  | ,000  | ,000  |
|                              | 403073102            | ,000             | ,000  | ,000  | ,000  |
|                              | 403073103            | ,000             | ,000  | ,000  | ,000  |
|                              | 403073202            | ,000             | ,000  | ,000  | ,000  |
|                              | 403073203            | ,000             | ,000  | ,000  | ,000  |
|                              | 403073204            | ,000             | ,000  | ,000  | ,000  |
|                              | 403073303            | ,000             | ,000  | ,000  | ,000  |
|                              | 403073651            | ,000             | ,000  | ,000  | ,000  |
|                              | 403073771            | ,000             | ,000  | ,000  | ,000  |
|                              | 403133102            | ,000             | ,000  | ,000  | ,000  |
|                              | 403133106            | ,000             | ,000  | ,000  | ,000  |
|                              | 403133107            | ,000             | ,000  | ,000  | ,000  |
|                              | 403133109            | ,000             | ,000  | ,000  | ,000  |
|                              | 403133202            | ,000             | ,000  | ,000  | ,000  |
|                              | 403133203            | ,000             | ,000  | ,000  | ,000  |
|                              | 403133204            | ,000             | ,000  | ,000  | ,000  |
|                              | 403133315            | ,000             | ,000  | ,000  | ,000  |
|                              | 403133322            | ,000             | ,000  | ,000  | ,000  |
|                              | 403133401            | ,000             | ,000  | ,000  | ,000  |
|                              | 403133402            | ,000             | ,000  | ,000  | ,000  |
|                              | 403133550            | ,000             | ,000  | ,000  | ,000  |
|                              | 403133772            | ,000             | ,000  | ,000  | ,000  |
|                              | 403135803            | ,000             | ,000  | ,000  | ,000  |
|                              | 404060001            | ,000             | ,000  | ,000  | ,000  |
|                              | 404060002            | ,000             | ,000  | ,000  | ,000  |
|                              | 404310003            | ,000             | ,000  | ,000  | ,000  |
|                              | 404310004            | ,000             | ,000  | ,000  | ,000  |
|                              | 502300005            | ,000             | ,000  | ,000  | ,000  |
|                              | 502300006            | 1,000            | ,000  | ,000  | ,000  |
|                              | 502300007            | ,000             | 1,000 | ,000  | ,000  |
|                              | 502300214            | ,000             | ,000  | 1,000 | ,000  |
|                              | 502300411            | ,000             | ,000  | ,000  | 1,000 |
|                              | 502300415            | ,000             | ,000  | ,000  | ,000  |
|                              | 502300416            | ,000             | ,000  | ,000  | ,000  |
|                              | 502300811            | ,000             | ,000  | ,000  | ,000  |
|                              | 502300913            | ,000             | ,000  | ,000  | ,000  |
| sv7 sjättedelar för standard | 1 fjärde sjundedelen |                  |       |       |       |
|                              | 2 första sjundedelen |                  |       |       |       |

## Categorical Variables Codings

|                              |                      | Parameter coding |       |       |       |
|------------------------------|----------------------|------------------|-------|-------|-------|
|                              |                      | (32)             | (33)  | (34)  | (35)  |
| VASTY2 (SAIR*10000)+VASTY    | 403073101            | ,000             | ,000  | ,000  | ,000  |
|                              | 403073102            | ,000             | ,000  | ,000  | ,000  |
|                              | 403073103            | ,000             | ,000  | ,000  | ,000  |
|                              | 403073202            | ,000             | ,000  | ,000  | ,000  |
|                              | 403073203            | ,000             | ,000  | ,000  | ,000  |
|                              | 403073204            | ,000             | ,000  | ,000  | ,000  |
|                              | 403073303            | ,000             | ,000  | ,000  | ,000  |
|                              | 403073651            | ,000             | ,000  | ,000  | ,000  |
|                              | 403073771            | ,000             | ,000  | ,000  | ,000  |
|                              | 403133102            | ,000             | ,000  | ,000  | ,000  |
|                              | 403133106            | ,000             | ,000  | ,000  | ,000  |
|                              | 403133107            | ,000             | ,000  | ,000  | ,000  |
|                              | 403133109            | ,000             | ,000  | ,000  | ,000  |
|                              | 403133202            | ,000             | ,000  | ,000  | ,000  |
|                              | 403133203            | ,000             | ,000  | ,000  | ,000  |
|                              | 403133204            | ,000             | ,000  | ,000  | ,000  |
|                              | 403133315            | ,000             | ,000  | ,000  | ,000  |
|                              | 403133322            | ,000             | ,000  | ,000  | ,000  |
|                              | 403133401            | ,000             | ,000  | ,000  | ,000  |
|                              | 403133402            | ,000             | ,000  | ,000  | ,000  |
|                              | 403133550            | ,000             | ,000  | ,000  | ,000  |
|                              | 403133772            | ,000             | ,000  | ,000  | ,000  |
|                              | 403135803            | ,000             | ,000  | ,000  | ,000  |
|                              | 404060001            | ,000             | ,000  | ,000  | ,000  |
|                              | 404060002            | ,000             | ,000  | ,000  | ,000  |
|                              | 404310003            | ,000             | ,000  | ,000  | ,000  |
|                              | 404310004            | ,000             | ,000  | ,000  | ,000  |
|                              | 502300005            | ,000             | ,000  | ,000  | ,000  |
|                              | 502300006            | ,000             | ,000  | ,000  | ,000  |
|                              | 502300007            | ,000             | ,000  | ,000  | ,000  |
|                              | 502300214            | ,000             | ,000  | ,000  | ,000  |
|                              | 502300411            | ,000             | ,000  | ,000  | ,000  |
|                              | 502300415            | 1,000            | ,000  | ,000  | ,000  |
|                              | 502300416            | ,000             | 1,000 | ,000  | ,000  |
|                              | 502300811            | ,000             | ,000  | 1,000 | ,000  |
|                              | 502300913            | ,000             | ,000  | ,000  | 1,000 |
| sv7 sjättedelar för standard | 1 fjärde sjundedelen |                  |       |       |       |
|                              | 2 första sjundedelen |                  |       |       |       |

**Categorical Variables Codings**

|                      | Frequency | Parameter coding |       |       |
|----------------------|-----------|------------------|-------|-------|
|                      |           | (1)              | (2)   | (3)   |
| 3 andra sjundedelen  | 1238      | ,000             | 1,000 | ,000  |
| 4 tredje sjundedelen | 1255      | ,000             | ,000  | 1,000 |
| 5 femte sjundedelen  | 1445      | ,000             | ,000  | ,000  |
| 6 sjätte sjundedelen | 1948      | ,000             | ,000  | ,000  |
| 7 sjunde sjundedelen | 2135      | ,000             | ,000  | ,000  |

**Categorical Variables Codings**

|                      | Frequency | Parameter coding |       |      |     |
|----------------------|-----------|------------------|-------|------|-----|
|                      |           | (4)              | (5)   | (6)  | (7) |
| 3 andra sjundedelen  | ,000      | ,000             | ,000  | ,000 |     |
| 4 tredje sjundedelen | ,000      | ,000             | ,000  | ,000 |     |
| 5 femte sjundedelen  | 1,000     | ,000             | ,000  | ,000 |     |
| 6 sjätte sjundedelen | ,000      | 1,000            | ,000  | ,000 |     |
| 7 sjunde sjundedelen | ,000      | ,000             | 1,000 | ,000 |     |

**Categorical Variables Codings**

|                      | Frequency | Parameter coding |     |      |      |
|----------------------|-----------|------------------|-----|------|------|
|                      |           | (8)              | (9) | (10) | (11) |
| 3 andra sjundedelen  |           |                  |     |      |      |
| 4 tredje sjundedelen |           |                  |     |      |      |
| 5 femte sjundedelen  |           |                  |     |      |      |
| 6 sjätte sjundedelen |           |                  |     |      |      |
| 7 sjunde sjundedelen |           |                  |     |      |      |

**Categorical Variables Codings**

|                      | Frequency | Parameter coding |      |      |      |
|----------------------|-----------|------------------|------|------|------|
|                      |           | (12)             | (13) | (14) | (15) |
| 3 andra sjundedelen  |           |                  |      |      |      |
| 4 tredje sjundedelen |           |                  |      |      |      |
| 5 femte sjundedelen  |           |                  |      |      |      |
| 6 sjätte sjundedelen |           |                  |      |      |      |
| 7 sjunde sjundedelen |           |                  |      |      |      |

**Categorical Variables Codings**

|                      | Frequency | Parameter coding |      |      |      |
|----------------------|-----------|------------------|------|------|------|
|                      |           | (16)             | (17) | (18) | (19) |
| 3 andra sjundedelen  |           |                  |      |      |      |
| 4 tredje sjundedelen |           |                  |      |      |      |
| 5 femte sjundedelen  |           |                  |      |      |      |
| 6 sjätte sjundedelen |           |                  |      |      |      |
| 7 sjunde sjundedelen |           |                  |      |      |      |

**Categorical Variables Codings**

|                      | Parameter coding |      |      |      |
|----------------------|------------------|------|------|------|
|                      | (20)             | (21) | (22) | (23) |
| 3 andra sjundedelen  |                  |      |      |      |
| 4 tredje sjundedelen |                  |      |      |      |
| 5 femte sjundedelen  |                  |      |      |      |
| 6 sjätte sjundedelen |                  |      |      |      |
| 7 sjunde sjundedelen |                  |      |      |      |

**Categorical Variables Codings**

|                      | Parameter coding |      |      |      |
|----------------------|------------------|------|------|------|
|                      | (24)             | (25) | (26) | (27) |
| 3 andra sjundedelen  |                  |      |      |      |
| 4 tredje sjundedelen |                  |      |      |      |
| 5 femte sjundedelen  |                  |      |      |      |
| 6 sjätte sjundedelen |                  |      |      |      |
| 7 sjunde sjundedelen |                  |      |      |      |

**Categorical Variables Codings**

|                      | Parameter coding |      |      |      |
|----------------------|------------------|------|------|------|
|                      | (28)             | (29) | (30) | (31) |
| 3 andra sjundedelen  |                  |      |      |      |
| 4 tredje sjundedelen |                  |      |      |      |
| 5 femte sjundedelen  |                  |      |      |      |
| 6 sjätte sjundedelen |                  |      |      |      |
| 7 sjunde sjundedelen |                  |      |      |      |

**Categorical Variables Codings**

|                      | Parameter coding |      |      |      |
|----------------------|------------------|------|------|------|
|                      | (32)             | (33) | (34) | (35) |
| 3 andra sjundedelen  |                  |      |      |      |
| 4 tredje sjundedelen |                  |      |      |      |
| 5 femte sjundedelen  |                  |      |      |      |
| 6 sjätte sjundedelen |                  |      |      |      |
| 7 sjunde sjundedelen |                  |      |      |      |

**Block 0: Beginning Block**



Classification Table<sup>a,b</sup>

| Observed           |                             |                      | Predicted                   |                      |
|--------------------|-----------------------------|----------------------|-----------------------------|----------------------|
|                    |                             |                      | dod01 dödsfall ja eller nej |                      |
|                    |                             |                      | 0 inget dödsfall            | 1 minst ett dödsfall |
| Step 0             | dod01 dödsfall ja eller nej | 0 inget dödsfall     | 11839                       | 0                    |
|                    |                             | 1 minst ett dödsfall | 636                         | 0                    |
| Overall Percentage |                             |                      |                             |                      |

Classification Table<sup>a,b</sup>

| Observed           |                             |                      | Predicted          |
|--------------------|-----------------------------|----------------------|--------------------|
|                    |                             |                      | Percentage Correct |
| Step 0             | dod01 dödsfall ja eller nej | 0 inget dödsfall     | 100,0              |
|                    |                             | 1 minst ett dödsfall | ,0                 |
| Overall Percentage |                             |                      | 94,9               |

a. Constant is included in the model.

b. The cut value is ,500

Variables in the Equation

|                 | B      | S.E. | Wald     | df | Sig. | Exp(B) |
|-----------------|--------|------|----------|----|------|--------|
| Step 0 Constant | -2,924 | ,041 | 5160,279 | 1  | ,000 | ,054   |

## Variables not in the Equation

|        |           |            | Score   | df | Sig. |
|--------|-----------|------------|---------|----|------|
| Step 0 | Variables | sv7        | 110,455 | 6  | ,000 |
|        |           | sv7(1)     | 94,684  | 1  | ,000 |
|        |           | sv7(2)     | 2,196   | 1  | ,138 |
|        |           | sv7(3)     | 1,177   | 1  | ,278 |
|        |           | sv7(4)     | 14,883  | 1  | ,000 |
|        |           | sv7(5)     | 23,997  | 1  | ,000 |
|        |           | sv7(6)     | ,095    | 1  | ,758 |
|        |           | VASTY2     | 635,545 | 35 | ,000 |
|        |           | VASTY2(1)  | 2,519   | 1  | ,113 |
|        |           | VASTY2(2)  | 6,299   | 1  | ,012 |
|        |           | VASTY2(3)  | 8,957   | 1  | ,003 |
|        |           | VASTY2(4)  | ,151    | 1  | ,698 |
|        |           | VASTY2(5)  | 7,537   | 1  | ,006 |
|        |           | VASTY2(6)  | 20,142  | 1  | ,000 |
|        |           | VASTY2(7)  | 127,387 | 1  | ,000 |
|        |           | VASTY2(8)  | 8,957   | 1  | ,003 |
|        |           | VASTY2(9)  | ,163    | 1  | ,687 |
|        |           | VASTY2(10) | 7,570   | 1  | ,006 |
|        |           | VASTY2(11) | ,113    | 1  | ,737 |
|        |           | VASTY2(12) | 47,021  | 1  | ,000 |
|        |           | VASTY2(13) | 90,515  | 1  | ,000 |
|        |           | VASTY2(14) | 7,570   | 1  | ,006 |
|        |           | VASTY2(15) | ,151    | 1  | ,698 |
|        |           | VASTY2(16) | 4,298   | 1  | ,038 |
|        |           | VASTY2(17) | 20,199  | 1  | ,000 |
|        |           | VASTY2(18) | 17,916  | 1  | ,000 |
|        |           | VASTY2(19) | 18,086  | 1  | ,000 |
|        |           | VASTY2(20) | 10,563  | 1  | ,001 |
|        |           | VASTY2(21) | 1,696   | 1  | ,193 |
|        |           | VASTY2(22) | 26,693  | 1  | ,000 |
|        |           | VASTY2(23) | 1,125   | 1  | ,289 |
|        |           | VASTY2(24) | 72,662  | 1  | ,000 |
|        |           | VASTY2(25) | 2,477   | 1  | ,116 |
|        |           | VASTY2(26) | 16,006  | 1  | ,000 |
|        |           | VASTY2(27) | 20,256  | 1  | ,000 |
|        |           | VASTY2(28) | 12,309  | 1  | ,000 |
|        |           | VASTY2(29) | 20,256  | 1  | ,000 |
|        |           | VASTY2(30) | 1,263   | 1  | ,261 |
|        |           | VASTY2(31) | 20,256  | 1  | ,000 |
|        |           | VASTY2(32) | 15,810  | 1  | ,000 |
|        |           | VASTY2(33) | 17,973  | 1  | ,000 |
|        |           | VASTY2(34) | ,693    | 1  | ,405 |
|        |           | VASTY2(35) | 17,360  | 1  | ,000 |

## Variables not in the Equation

|                    | Score   | df | Sig. |
|--------------------|---------|----|------|
| Overall Statistics | 648,860 | 41 | ,000 |

## Block 1: Method = Enter

## Omnibus Tests of Model Coefficients

|             | Chi-square | df | Sig. |
|-------------|------------|----|------|
| Step 1 Step | 716,984    | 41 | ,000 |
| Block       | 716,984    | 41 | ,000 |
| Model       | 716,984    | 41 | ,000 |

## Model Summary

| Step | -2 Log likelihood     | Cox & Snell R Square | Nagelkerke R Square |
|------|-----------------------|----------------------|---------------------|
| 1    | 4307,858 <sup>a</sup> | ,056                 | ,168                |

a. Estimation terminated at iteration number 20 because maximum iterations has been reached. Final solution cannot be found.

Classification Table<sup>a</sup>

|                    |                             | Predicted                   |                      |
|--------------------|-----------------------------|-----------------------------|----------------------|
|                    |                             | dod01 dödsfall ja eller nej |                      |
| Observed           |                             | 0 inget dödsfall            | 1 minst ett dödsfall |
| Step 1             | dod01 dödsfall ja eller nej | 11839                       | 0                    |
|                    |                             | 636                         | 0                    |
| Overall Percentage |                             |                             |                      |

Classification Table<sup>a</sup>

|                    |                             | Predicted          |
|--------------------|-----------------------------|--------------------|
|                    |                             | Percentage Correct |
| Step 1             | dod01 dödsfall ja eller nej | 100,0              |
|                    |                             | ,0                 |
| Overall Percentage |                             | 94,9               |

a. The cut value is ,500

## Variables in the Equation

|                         | B       | S.E.     | Wald    | df | Sig. | Exp(B) |
|-------------------------|---------|----------|---------|----|------|--------|
| Step 1 <sup>a</sup> sv7 |         |          | 13,618  | 6  | ,034 |        |
| sv7(1)                  | -,355   | ,189     | 3,510   | 1  | ,061 | ,701   |
| sv7(2)                  | ,155    | ,168     | ,847    | 1  | ,357 | 1,167  |
| sv7(3)                  | -,016   | ,169     | ,009    | 1  | ,922 | ,984   |
| sv7(4)                  | ,131    | ,155     | ,715    | 1  | ,398 | 1,140  |
| sv7(5)                  | ,222    | ,151     | 2,168   | 1  | ,141 | 1,249  |
| sv7(6)                  | ,327    | ,175     | 3,490   | 1  | ,062 | 1,387  |
| VASTY2                  |         |          | 208,518 | 35 | ,000 |        |
| VASTY2(1)               | ,570    | ,344     | 2,746   | 1  | ,097 | 1,769  |
| VASTY2(2)               | ,616    | ,341     | 3,253   | 1  | ,071 | 1,851  |
| VASTY2(3)               | ,867    | ,332     | 6,833   | 1  | ,009 | 2,380  |
| VASTY2(4)               | ,219    | ,370     | ,353    | 1  | ,553 | 1,245  |
| VASTY2(5)               | -,660   | ,496     | 1,769   | 1  | ,183 | ,517   |
| VASTY2(6)               | -18,205 | 2105,313 | ,000    | 1  | ,993 | ,000   |
| VASTY2(7)               | 1,744   | ,306     | 32,553  | 1  | ,000 | 5,717  |
| VASTY2(8)               | ,893    | ,333     | 7,212   | 1  | ,007 | 2,444  |
| VASTY2(9)               | ,388    | ,361     | 1,158   | 1  | ,282 | 1,475  |
| VASTY2(10)              | ,622    | ,342     | 3,304   | 1  | ,069 | 1,862  |
| VASTY2(11)              | ,398    | ,357     | 1,243   | 1  | ,265 | 1,489  |
| VASTY2(12)              | 1,175   | ,318     | 13,619  | 1  | ,000 | 3,239  |
| VASTY2(13)              | 1,360   | ,319     | 18,196  | 1  | ,000 | 3,897  |
| VASTY2(14)              | ,706    | ,336     | 4,415   | 1  | ,036 | 2,027  |
| VASTY2(15)              | ,050    | ,375     | ,018    | 1  | ,893 | 1,052  |
| VASTY2(16)              | -,873   | ,645     | 1,833   | 1  | ,176 | ,418   |
| VASTY2(17)              | -17,928 | 2097,570 | ,000    | 1  | ,993 | ,000   |
| VASTY2(18)              | -2,286  | 1,047    | 4,773   | 1  | ,029 | ,102   |
| VASTY2(19)              | -2,263  | 1,048    | 4,660   | 1  | ,031 | ,104   |
| VASTY2(20)              | -1,475  | ,644     | 5,243   | 1  | ,022 | ,229   |
| VASTY2(21)              | ,616    | ,346     | 3,181   | 1  | ,074 | 1,852  |
| VASTY2(22)              | 1,118   | ,320     | 12,203  | 1  | ,000 | 3,060  |
| VASTY2(23)              | ,564    | ,348     | 2,631   | 1  | ,105 | 1,758  |
| VASTY2(24)              | 1,397   | ,311     | 20,135  | 1  | ,000 | 4,044  |
| VASTY2(25)              | -,146   | ,436     | ,113    | 1  | ,737 | ,864   |
| VASTY2(26)              | -17,989 | 2350,865 | ,000    | 1  | ,994 | ,000   |
| VASTY2(27)              | -18,112 | 2097,325 | ,000    | 1  | ,993 | ,000   |
| VASTY2(28)              | -18,236 | 2678,872 | ,000    | 1  | ,995 | ,000   |
| VASTY2(29)              | -18,246 | 2100,824 | ,000    | 1  | ,993 | ,000   |
| VASTY2(30)              | ,059    | ,387     | ,023    | 1  | ,879 | 1,061  |
| VASTY2(31)              | -17,707 | 2095,196 | ,000    | 1  | ,993 | ,000   |
| VASTY2(32)              | -1,586  | ,772     | 4,227   | 1  | ,040 | ,205   |
| VASTY2(33)              | -2,258  | 1,048    | 4,637   | 1  | ,031 | ,105   |
| VASTY2(34)              | ,474    | ,351     | 1,830   | 1  | ,176 | 1,607  |

## Variables in the Equation

|                     |            | 95% C.I. for EXP(B) |        |
|---------------------|------------|---------------------|--------|
|                     |            | Lower               | Upper  |
| Step 1 <sup>a</sup> | sv7        |                     |        |
|                     | sv7(1)     | ,484                | 1,017  |
|                     | sv7(2)     | ,840                | 1,623  |
|                     | sv7(3)     | ,707                | 1,369  |
|                     | sv7(4)     | ,841                | 1,544  |
|                     | sv7(5)     | ,929                | 1,678  |
|                     | sv7(6)     | ,984                | 1,954  |
|                     | VASTY2     |                     |        |
|                     | VASTY2(1)  | ,901                | 3,472  |
|                     | VASTY2(2)  | ,948                | 3,613  |
|                     | VASTY2(3)  | 1,242               | 4,559  |
|                     | VASTY2(4)  | ,604                | 2,569  |
|                     | VASTY2(5)  | ,196                | 1,367  |
|                     | VASTY2(6)  | ,000                | .      |
|                     | VASTY2(7)  | 3,141               | 10,407 |
|                     | VASTY2(8)  | 1,273               | 4,691  |
|                     | VASTY2(9)  | ,727                | 2,992  |
|                     | VASTY2(10) | ,953                | 3,642  |
|                     | VASTY2(11) | ,739                | 3,000  |
|                     | VASTY2(12) | 1,735               | 6,046  |
|                     | VASTY2(13) | 2,086               | 7,281  |
|                     | VASTY2(14) | 1,049               | 3,917  |
|                     | VASTY2(15) | ,504                | 2,193  |
|                     | VASTY2(16) | ,118                | 1,479  |
|                     | VASTY2(17) | ,000                | .      |
|                     | VASTY2(18) | ,013                | ,790   |
|                     | VASTY2(19) | ,013                | ,812   |
|                     | VASTY2(20) | ,065                | ,809   |
|                     | VASTY2(21) | ,941                | 3,646  |
|                     | VASTY2(22) | 1,634               | 5,732  |
|                     | VASTY2(23) | ,889                | 3,478  |
|                     | VASTY2(24) | 2,197               | 7,444  |
|                     | VASTY2(25) | ,368                | 2,031  |
|                     | VASTY2(26) | ,000                | .      |
|                     | VASTY2(27) | ,000                | .      |
|                     | VASTY2(28) | ,000                | .      |
|                     | VASTY2(29) | ,000                | .      |
|                     | VASTY2(30) | ,497                | 2,264  |
|                     | VASTY2(31) | ,000                | .      |
|                     | VASTY2(32) | ,045                | ,929   |
|                     | VASTY2(33) | ,013                | ,816   |
|                     | VASTY2(34) | ,808                | 3,194  |

## Variables in the Equation

|            | B       | S.E.     | Wald    | df | Sig. | Exp(B) |
|------------|---------|----------|---------|----|------|--------|
| VASTY2(35) | -17,967 | 2257,374 | ,000    | 1  | ,994 | ,000   |
| Constant   | -3,279  | ,291     | 127,145 | 1  | ,000 | ,038   |

## Variables in the Equation

|            | 95% C.I. for EXP(B) |       |
|------------|---------------------|-------|
|            | Lower               | Upper |
| VASTY2(35) | ,000                | .     |
| Constant   |                     |       |

a. Variable(s) entered on step 1: sv7, VASTY2.

\*\*

EXECUTE .

COMMENT körs på abo\_bjo\_vasa\_v1.sav

COMMENT med kontroll för VASTY2, weekday, holiday, season

COMMENT läses i Table 2 som första kolumnen, sex modeller, andra kolumnen,  
sex modeller, osv

COMMENT till Table 4 läses modellerna 1,7,13,19,25

\*\*

LOGISTIC REGRESSION VARIABLES hand01

/METHOD=ENTER bv1 VASTY2 weekday holiday season

/CONTRAST (bv1)=Indicator(1)

/CONTRAST (VASTY2)=Indicator(1)

/CONTRAST (weekday)=Indicator(1)

/CONTRAST (holiday)=Indicator(1)

/CONTRAST (season)=Indicator(1)

/PRINT=CI(95)

/CRITERIA=PIN(0.05) POUT(0.10) ITERATE(20) CUT(0.5).

## Logistic Regression

[DataSet6] C:\cWordjan\Rafaela\_VCS\alla\_tillsammans\abo\_bjo\_vasa\_v1.sav

### Case Processing Summary

| Unweighted Cases <sup>a</sup> |                      | N     | Percent |
|-------------------------------|----------------------|-------|---------|
| Selected Cases                | Included in Analysis | 12475 | 100,0   |
|                               | Missing Cases        | 0     | ,0      |
|                               | Total                | 12475 | 100,0   |
| Unselected Cases              |                      | 0     | ,0      |
| Total                         |                      | 12475 | 100,0   |

a. If weight is in effect, see classification table for the total number of cases.

### Dependent Variable Encoding

| Original Value      | Internal Value |
|---------------------|----------------|
| 0 ingen händelse    | 0              |
| 1 minst en händelse | 1              |

## Categorical Variables Codings

|                           |           | Frequency | Parameter<br>(1) |
|---------------------------|-----------|-----------|------------------|
| VASTY2 (SAIR*10000)+VASTY | 403073101 | 365       | ,000             |
|                           | 403073102 | 362       | 1,000            |
|                           | 403073103 | 365       | ,000             |
|                           | 403073202 | 365       | ,000             |
|                           | 403073203 | 365       | ,000             |
|                           | 403073204 | 330       | ,000             |
|                           | 403073303 | 364       | ,000             |
|                           | 403073651 | 362       | ,000             |
|                           | 403073771 | 365       | ,000             |
|                           | 403133102 | 341       | ,000             |
|                           | 403133106 | 365       | ,000             |
|                           | 403133107 | 365       | ,000             |
|                           | 403133109 | 365       | ,000             |
|                           | 403133202 | 365       | ,000             |
|                           | 403133203 | 365       | ,000             |
|                           | 403133204 | 365       | ,000             |
|                           | 403133315 | 177       | ,000             |
|                           | 403133322 | 365       | ,000             |
|                           | 403133401 | 362       | ,000             |
|                           | 403133402 | 365       | ,000             |
|                           | 403133550 | 298       | ,000             |
|                           | 403133772 | 365       | ,000             |
|                           | 403135803 | 365       | ,000             |
|                           | 404060001 | 365       | ,000             |
|                           | 404060002 | 366       | ,000             |
|                           | 404310003 | 291       | ,000             |
|                           | 404310004 | 291       | ,000             |
|                           | 502300005 | 366       | ,000             |
|                           | 502300006 | 225       | ,000             |
|                           | 502300007 | 366       | ,000             |
|                           | 502300214 | 366       | ,000             |
|                           | 502300411 | 366       | ,000             |
|                           | 502300415 | 360       | ,000             |
|                           | 502300416 | 363       | ,000             |
|                           | 502300811 | 364       | ,000             |
|                           | 502300913 | 315       | ,000             |
| weekday veckodag          | 1 måndag  | 1805      | ,000             |
|                           | 2 tisdag  | 1812      | 1,000            |



## Categorical Variables Codings

|                           |           | Parameter coding |       |
|---------------------------|-----------|------------------|-------|
|                           |           | (2)              | (3)   |
| VASTY2 (SAIR*10000)+VASTY | 403073101 | ,000             | ,000  |
|                           | 403073102 | ,000             | ,000  |
|                           | 403073103 | 1,000            | ,000  |
|                           | 403073202 | ,000             | 1,000 |
|                           | 403073203 | ,000             | ,000  |
|                           | 403073204 | ,000             | ,000  |
|                           | 403073303 | ,000             | ,000  |
|                           | 403073651 | ,000             | ,000  |
|                           | 403073771 | ,000             | ,000  |
|                           | 403133102 | ,000             | ,000  |
|                           | 403133106 | ,000             | ,000  |
|                           | 403133107 | ,000             | ,000  |
|                           | 403133109 | ,000             | ,000  |
|                           | 403133202 | ,000             | ,000  |
|                           | 403133203 | ,000             | ,000  |
|                           | 403133204 | ,000             | ,000  |
|                           | 403133315 | ,000             | ,000  |
|                           | 403133322 | ,000             | ,000  |
|                           | 403133401 | ,000             | ,000  |
|                           | 403133402 | ,000             | ,000  |
|                           | 403133550 | ,000             | ,000  |
|                           | 403133772 | ,000             | ,000  |
|                           | 403135803 | ,000             | ,000  |
|                           | 404060001 | ,000             | ,000  |
|                           | 404060002 | ,000             | ,000  |
|                           | 404310003 | ,000             | ,000  |
|                           | 404310004 | ,000             | ,000  |
|                           | 502300005 | ,000             | ,000  |
|                           | 502300006 | ,000             | ,000  |
|                           | 502300007 | ,000             | ,000  |
|                           | 502300214 | ,000             | ,000  |
|                           | 502300411 | ,000             | ,000  |
|                           | 502300415 | ,000             | ,000  |
|                           | 502300416 | ,000             | ,000  |
|                           | 502300811 | ,000             | ,000  |
|                           | 502300913 | ,000             | ,000  |
| weekday veckodag          | 1 måndag  | ,000             | ,000  |
|                           | 2 tisdag  | ,000             | ,000  |

## Categorical Variables Codings

|                           |           | Parameter coding |       |
|---------------------------|-----------|------------------|-------|
|                           |           | (4)              | (5)   |
| VASTY2 (SAIR*10000)+VASTY | 403073101 | ,000             | ,000  |
|                           | 403073102 | ,000             | ,000  |
|                           | 403073103 | ,000             | ,000  |
|                           | 403073202 | ,000             | ,000  |
|                           | 403073203 | 1,000            | ,000  |
|                           | 403073204 | ,000             | 1,000 |
|                           | 403073303 | ,000             | ,000  |
|                           | 403073651 | ,000             | ,000  |
|                           | 403073771 | ,000             | ,000  |
|                           | 403133102 | ,000             | ,000  |
|                           | 403133106 | ,000             | ,000  |
|                           | 403133107 | ,000             | ,000  |
|                           | 403133109 | ,000             | ,000  |
|                           | 403133202 | ,000             | ,000  |
|                           | 403133203 | ,000             | ,000  |
|                           | 403133204 | ,000             | ,000  |
|                           | 403133315 | ,000             | ,000  |
|                           | 403133322 | ,000             | ,000  |
|                           | 403133401 | ,000             | ,000  |
|                           | 403133402 | ,000             | ,000  |
|                           | 403133550 | ,000             | ,000  |
|                           | 403133772 | ,000             | ,000  |
|                           | 403135803 | ,000             | ,000  |
|                           | 404060001 | ,000             | ,000  |
|                           | 404060002 | ,000             | ,000  |
|                           | 404310003 | ,000             | ,000  |
|                           | 404310004 | ,000             | ,000  |
|                           | 502300005 | ,000             | ,000  |
|                           | 502300006 | ,000             | ,000  |
|                           | 502300007 | ,000             | ,000  |
|                           | 502300214 | ,000             | ,000  |
|                           | 502300411 | ,000             | ,000  |
|                           | 502300415 | ,000             | ,000  |
|                           | 502300416 | ,000             | ,000  |
|                           | 502300811 | ,000             | ,000  |
|                           | 502300913 | ,000             | ,000  |
| weekday veckodag          | 1 måndag  | ,000             | ,000  |
|                           | 2 tisdag  | ,000             | ,000  |

## Categorical Variables Codings

|                           |           | Parameter coding |       |
|---------------------------|-----------|------------------|-------|
|                           |           | (6)              | (7)   |
| VASTY2 (SAIR*10000)+VASTY | 403073101 | ,000             | ,000  |
|                           | 403073102 | ,000             | ,000  |
|                           | 403073103 | ,000             | ,000  |
|                           | 403073202 | ,000             | ,000  |
|                           | 403073203 | ,000             | ,000  |
|                           | 403073204 | ,000             | ,000  |
|                           | 403073303 | 1,000            | ,000  |
|                           | 403073651 | ,000             | 1,000 |
|                           | 403073771 | ,000             | ,000  |
|                           | 403133102 | ,000             | ,000  |
|                           | 403133106 | ,000             | ,000  |
|                           | 403133107 | ,000             | ,000  |
|                           | 403133109 | ,000             | ,000  |
|                           | 403133202 | ,000             | ,000  |
|                           | 403133203 | ,000             | ,000  |
|                           | 403133204 | ,000             | ,000  |
|                           | 403133315 | ,000             | ,000  |
|                           | 403133322 | ,000             | ,000  |
|                           | 403133401 | ,000             | ,000  |
|                           | 403133402 | ,000             | ,000  |
|                           | 403133550 | ,000             | ,000  |
|                           | 403133772 | ,000             | ,000  |
|                           | 403135803 | ,000             | ,000  |
|                           | 404060001 | ,000             | ,000  |
|                           | 404060002 | ,000             | ,000  |
|                           | 404310003 | ,000             | ,000  |
|                           | 404310004 | ,000             | ,000  |
|                           | 502300005 | ,000             | ,000  |
|                           | 502300006 | ,000             | ,000  |
|                           | 502300007 | ,000             | ,000  |
|                           | 502300214 | ,000             | ,000  |
|                           | 502300411 | ,000             | ,000  |
|                           | 502300415 | ,000             | ,000  |
|                           | 502300416 | ,000             | ,000  |
|                           | 502300811 | ,000             | ,000  |
|                           | 502300913 | ,000             | ,000  |
| weekday veckodag          | 1 måndag  | ,000             |       |
|                           | 2 tisdag  | ,000             |       |

## Categorical Variables Codings

|                           |           | Parameter coding |       |
|---------------------------|-----------|------------------|-------|
|                           |           | (8)              | (9)   |
| VASTY2 (SAIR*10000)+VASTY | 403073101 | ,000             | ,000  |
|                           | 403073102 | ,000             | ,000  |
|                           | 403073103 | ,000             | ,000  |
|                           | 403073202 | ,000             | ,000  |
|                           | 403073203 | ,000             | ,000  |
|                           | 403073204 | ,000             | ,000  |
|                           | 403073303 | ,000             | ,000  |
|                           | 403073651 | ,000             | ,000  |
|                           | 403073771 | 1,000            | ,000  |
|                           | 403133102 | ,000             | 1,000 |
|                           | 403133106 | ,000             | ,000  |
|                           | 403133107 | ,000             | ,000  |
|                           | 403133109 | ,000             | ,000  |
|                           | 403133202 | ,000             | ,000  |
|                           | 403133203 | ,000             | ,000  |
|                           | 403133204 | ,000             | ,000  |
|                           | 403133315 | ,000             | ,000  |
|                           | 403133322 | ,000             | ,000  |
|                           | 403133401 | ,000             | ,000  |
|                           | 403133402 | ,000             | ,000  |
|                           | 403133550 | ,000             | ,000  |
|                           | 403133772 | ,000             | ,000  |
|                           | 403135803 | ,000             | ,000  |
|                           | 404060001 | ,000             | ,000  |
|                           | 404060002 | ,000             | ,000  |
|                           | 404310003 | ,000             | ,000  |
|                           | 404310004 | ,000             | ,000  |
|                           | 502300005 | ,000             | ,000  |
|                           | 502300006 | ,000             | ,000  |
|                           | 502300007 | ,000             | ,000  |
|                           | 502300214 | ,000             | ,000  |
|                           | 502300411 | ,000             | ,000  |
|                           | 502300415 | ,000             | ,000  |
|                           | 502300416 | ,000             | ,000  |
|                           | 502300811 | ,000             | ,000  |
|                           | 502300913 | ,000             | ,000  |
| weekday veckodag          | 1 måndag  |                  |       |
|                           | 2 tisdag  |                  |       |

## Categorical Variables Codings

|                           |           | Parameter coding |       |
|---------------------------|-----------|------------------|-------|
|                           |           | (10)             | (11)  |
| VASTY2 (SAIR*10000)+VASTY | 403073101 | ,000             | ,000  |
|                           | 403073102 | ,000             | ,000  |
|                           | 403073103 | ,000             | ,000  |
|                           | 403073202 | ,000             | ,000  |
|                           | 403073203 | ,000             | ,000  |
|                           | 403073204 | ,000             | ,000  |
|                           | 403073303 | ,000             | ,000  |
|                           | 403073651 | ,000             | ,000  |
|                           | 403073771 | ,000             | ,000  |
|                           | 403133102 | ,000             | ,000  |
|                           | 403133106 | 1,000            | ,000  |
|                           | 403133107 | ,000             | 1,000 |
|                           | 403133109 | ,000             | ,000  |
|                           | 403133202 | ,000             | ,000  |
|                           | 403133203 | ,000             | ,000  |
|                           | 403133204 | ,000             | ,000  |
|                           | 403133315 | ,000             | ,000  |
|                           | 403133322 | ,000             | ,000  |
|                           | 403133401 | ,000             | ,000  |
|                           | 403133402 | ,000             | ,000  |
|                           | 403133550 | ,000             | ,000  |
|                           | 403133772 | ,000             | ,000  |
|                           | 403135803 | ,000             | ,000  |
|                           | 404060001 | ,000             | ,000  |
|                           | 404060002 | ,000             | ,000  |
|                           | 404310003 | ,000             | ,000  |
|                           | 404310004 | ,000             | ,000  |
|                           | 502300005 | ,000             | ,000  |
|                           | 502300006 | ,000             | ,000  |
|                           | 502300007 | ,000             | ,000  |
|                           | 502300214 | ,000             | ,000  |
|                           | 502300411 | ,000             | ,000  |
|                           | 502300415 | ,000             | ,000  |
|                           | 502300416 | ,000             | ,000  |
|                           | 502300811 | ,000             | ,000  |
|                           | 502300913 | ,000             | ,000  |
| weekday veckodag          | 1 måndag  |                  |       |
|                           | 2 tisdag  |                  |       |

## Categorical Variables Codings

|                           |           | Parameter coding |       |
|---------------------------|-----------|------------------|-------|
|                           |           | (12)             | (13)  |
| VASTY2 (SAIR*10000)+VASTY | 403073101 | ,000             | ,000  |
|                           | 403073102 | ,000             | ,000  |
|                           | 403073103 | ,000             | ,000  |
|                           | 403073202 | ,000             | ,000  |
|                           | 403073203 | ,000             | ,000  |
|                           | 403073204 | ,000             | ,000  |
|                           | 403073303 | ,000             | ,000  |
|                           | 403073651 | ,000             | ,000  |
|                           | 403073771 | ,000             | ,000  |
|                           | 403133102 | ,000             | ,000  |
|                           | 403133106 | ,000             | ,000  |
|                           | 403133107 | ,000             | ,000  |
|                           | 403133109 | 1,000            | ,000  |
|                           | 403133202 | ,000             | 1,000 |
|                           | 403133203 | ,000             | ,000  |
|                           | 403133204 | ,000             | ,000  |
|                           | 403133315 | ,000             | ,000  |
|                           | 403133322 | ,000             | ,000  |
|                           | 403133401 | ,000             | ,000  |
|                           | 403133402 | ,000             | ,000  |
|                           | 403133550 | ,000             | ,000  |
|                           | 403133772 | ,000             | ,000  |
|                           | 403135803 | ,000             | ,000  |
|                           | 404060001 | ,000             | ,000  |
|                           | 404060002 | ,000             | ,000  |
|                           | 404310003 | ,000             | ,000  |
|                           | 404310004 | ,000             | ,000  |
|                           | 502300005 | ,000             | ,000  |
|                           | 502300006 | ,000             | ,000  |
|                           | 502300007 | ,000             | ,000  |
|                           | 502300214 | ,000             | ,000  |
|                           | 502300411 | ,000             | ,000  |
|                           | 502300415 | ,000             | ,000  |
|                           | 502300416 | ,000             | ,000  |
|                           | 502300811 | ,000             | ,000  |
|                           | 502300913 | ,000             | ,000  |
| weekday veckodag          | 1 måndag  |                  |       |
|                           | 2 tisdag  |                  |       |

## Categorical Variables Codings

|                           |           | Parameter coding |       |
|---------------------------|-----------|------------------|-------|
|                           |           | (14)             | (15)  |
| VASTY2 (SAIR*10000)+VASTY | 403073101 | ,000             | ,000  |
|                           | 403073102 | ,000             | ,000  |
|                           | 403073103 | ,000             | ,000  |
|                           | 403073202 | ,000             | ,000  |
|                           | 403073203 | ,000             | ,000  |
|                           | 403073204 | ,000             | ,000  |
|                           | 403073303 | ,000             | ,000  |
|                           | 403073651 | ,000             | ,000  |
|                           | 403073771 | ,000             | ,000  |
|                           | 403133102 | ,000             | ,000  |
|                           | 403133106 | ,000             | ,000  |
|                           | 403133107 | ,000             | ,000  |
|                           | 403133109 | ,000             | ,000  |
|                           | 403133202 | ,000             | ,000  |
|                           | 403133203 | 1,000            | ,000  |
|                           | 403133204 | ,000             | 1,000 |
|                           | 403133315 | ,000             | ,000  |
|                           | 403133322 | ,000             | ,000  |
|                           | 403133401 | ,000             | ,000  |
|                           | 403133402 | ,000             | ,000  |
|                           | 403133550 | ,000             | ,000  |
|                           | 403133772 | ,000             | ,000  |
|                           | 403135803 | ,000             | ,000  |
|                           | 404060001 | ,000             | ,000  |
|                           | 404060002 | ,000             | ,000  |
|                           | 404310003 | ,000             | ,000  |
|                           | 404310004 | ,000             | ,000  |
|                           | 502300005 | ,000             | ,000  |
|                           | 502300006 | ,000             | ,000  |
|                           | 502300007 | ,000             | ,000  |
|                           | 502300214 | ,000             | ,000  |
|                           | 502300411 | ,000             | ,000  |
|                           | 502300415 | ,000             | ,000  |
|                           | 502300416 | ,000             | ,000  |
|                           | 502300811 | ,000             | ,000  |
|                           | 502300913 | ,000             | ,000  |
| weekday veckodag          | 1 måndag  |                  |       |
|                           | 2 tisdag  |                  |       |

## Categorical Variables Codings

|                           |           | Parameter coding |       |
|---------------------------|-----------|------------------|-------|
|                           |           | (16)             | (17)  |
| VASTY2 (SAIR*10000)+VASTY | 403073101 | ,000             | ,000  |
|                           | 403073102 | ,000             | ,000  |
|                           | 403073103 | ,000             | ,000  |
|                           | 403073202 | ,000             | ,000  |
|                           | 403073203 | ,000             | ,000  |
|                           | 403073204 | ,000             | ,000  |
|                           | 403073303 | ,000             | ,000  |
|                           | 403073651 | ,000             | ,000  |
|                           | 403073771 | ,000             | ,000  |
|                           | 403133102 | ,000             | ,000  |
|                           | 403133106 | ,000             | ,000  |
|                           | 403133107 | ,000             | ,000  |
|                           | 403133109 | ,000             | ,000  |
|                           | 403133202 | ,000             | ,000  |
|                           | 403133203 | ,000             | ,000  |
|                           | 403133204 | ,000             | ,000  |
|                           | 403133315 | 1,000            | ,000  |
|                           | 403133322 | ,000             | 1,000 |
|                           | 403133401 | ,000             | ,000  |
|                           | 403133402 | ,000             | ,000  |
|                           | 403133550 | ,000             | ,000  |
|                           | 403133772 | ,000             | ,000  |
|                           | 403135803 | ,000             | ,000  |
|                           | 404060001 | ,000             | ,000  |
|                           | 404060002 | ,000             | ,000  |
|                           | 404310003 | ,000             | ,000  |
|                           | 404310004 | ,000             | ,000  |
|                           | 502300005 | ,000             | ,000  |
|                           | 502300006 | ,000             | ,000  |
|                           | 502300007 | ,000             | ,000  |
|                           | 502300214 | ,000             | ,000  |
|                           | 502300411 | ,000             | ,000  |
|                           | 502300415 | ,000             | ,000  |
|                           | 502300416 | ,000             | ,000  |
|                           | 502300811 | ,000             | ,000  |
|                           | 502300913 | ,000             | ,000  |
| weekday veckodag          | 1 måndag  |                  |       |
|                           | 2 tisdag  |                  |       |



## Categorical Variables Codings

|                           |           | Parameter coding |       |
|---------------------------|-----------|------------------|-------|
|                           |           | (18)             | (19)  |
| VASTY2 (SAIR*10000)+VASTY | 403073101 | ,000             | ,000  |
|                           | 403073102 | ,000             | ,000  |
|                           | 403073103 | ,000             | ,000  |
|                           | 403073202 | ,000             | ,000  |
|                           | 403073203 | ,000             | ,000  |
|                           | 403073204 | ,000             | ,000  |
|                           | 403073303 | ,000             | ,000  |
|                           | 403073651 | ,000             | ,000  |
|                           | 403073771 | ,000             | ,000  |
|                           | 403133102 | ,000             | ,000  |
|                           | 403133106 | ,000             | ,000  |
|                           | 403133107 | ,000             | ,000  |
|                           | 403133109 | ,000             | ,000  |
|                           | 403133202 | ,000             | ,000  |
|                           | 403133203 | ,000             | ,000  |
|                           | 403133204 | ,000             | ,000  |
|                           | 403133315 | ,000             | ,000  |
|                           | 403133322 | ,000             | ,000  |
|                           | 403133401 | 1,000            | ,000  |
|                           | 403133402 | ,000             | 1,000 |
|                           | 403133550 | ,000             | ,000  |
|                           | 403133772 | ,000             | ,000  |
|                           | 403135803 | ,000             | ,000  |
|                           | 404060001 | ,000             | ,000  |
|                           | 404060002 | ,000             | ,000  |
|                           | 404310003 | ,000             | ,000  |
|                           | 404310004 | ,000             | ,000  |
|                           | 502300005 | ,000             | ,000  |
|                           | 502300006 | ,000             | ,000  |
|                           | 502300007 | ,000             | ,000  |
|                           | 502300214 | ,000             | ,000  |
|                           | 502300411 | ,000             | ,000  |
|                           | 502300415 | ,000             | ,000  |
|                           | 502300416 | ,000             | ,000  |
|                           | 502300811 | ,000             | ,000  |
|                           | 502300913 | ,000             | ,000  |
| weekday veckodag          | 1 måndag  |                  |       |
|                           | 2 tisdag  |                  |       |

## Categorical Variables Codings

|                           |           | Parameter coding |       |
|---------------------------|-----------|------------------|-------|
|                           |           | (20)             | (21)  |
| VASTY2 (SAIR*10000)+VASTY | 403073101 | ,000             | ,000  |
|                           | 403073102 | ,000             | ,000  |
|                           | 403073103 | ,000             | ,000  |
|                           | 403073202 | ,000             | ,000  |
|                           | 403073203 | ,000             | ,000  |
|                           | 403073204 | ,000             | ,000  |
|                           | 403073303 | ,000             | ,000  |
|                           | 403073651 | ,000             | ,000  |
|                           | 403073771 | ,000             | ,000  |
|                           | 403133102 | ,000             | ,000  |
|                           | 403133106 | ,000             | ,000  |
|                           | 403133107 | ,000             | ,000  |
|                           | 403133109 | ,000             | ,000  |
|                           | 403133202 | ,000             | ,000  |
|                           | 403133203 | ,000             | ,000  |
|                           | 403133204 | ,000             | ,000  |
|                           | 403133315 | ,000             | ,000  |
|                           | 403133322 | ,000             | ,000  |
|                           | 403133401 | ,000             | ,000  |
|                           | 403133402 | ,000             | ,000  |
|                           | 403133550 | 1,000            | ,000  |
|                           | 403133772 | ,000             | 1,000 |
|                           | 403135803 | ,000             | ,000  |
|                           | 404060001 | ,000             | ,000  |
|                           | 404060002 | ,000             | ,000  |
|                           | 404310003 | ,000             | ,000  |
|                           | 404310004 | ,000             | ,000  |
|                           | 502300005 | ,000             | ,000  |
|                           | 502300006 | ,000             | ,000  |
|                           | 502300007 | ,000             | ,000  |
|                           | 502300214 | ,000             | ,000  |
|                           | 502300411 | ,000             | ,000  |
|                           | 502300415 | ,000             | ,000  |
|                           | 502300416 | ,000             | ,000  |
|                           | 502300811 | ,000             | ,000  |
|                           | 502300913 | ,000             | ,000  |
| weekday veckodag          | 1 måndag  |                  |       |
|                           | 2 tisdag  |                  |       |

## Categorical Variables Codings

|                           |           | Parameter coding |       |
|---------------------------|-----------|------------------|-------|
|                           |           | (22)             | (23)  |
| VASTY2 (SAIR*10000)+VASTY | 403073101 | ,000             | ,000  |
|                           | 403073102 | ,000             | ,000  |
|                           | 403073103 | ,000             | ,000  |
|                           | 403073202 | ,000             | ,000  |
|                           | 403073203 | ,000             | ,000  |
|                           | 403073204 | ,000             | ,000  |
|                           | 403073303 | ,000             | ,000  |
|                           | 403073651 | ,000             | ,000  |
|                           | 403073771 | ,000             | ,000  |
|                           | 403133102 | ,000             | ,000  |
|                           | 403133106 | ,000             | ,000  |
|                           | 403133107 | ,000             | ,000  |
|                           | 403133109 | ,000             | ,000  |
|                           | 403133202 | ,000             | ,000  |
|                           | 403133203 | ,000             | ,000  |
|                           | 403133204 | ,000             | ,000  |
|                           | 403133315 | ,000             | ,000  |
|                           | 403133322 | ,000             | ,000  |
|                           | 403133401 | ,000             | ,000  |
|                           | 403133402 | ,000             | ,000  |
|                           | 403133550 | ,000             | ,000  |
|                           | 403133772 | ,000             | ,000  |
|                           | 403135803 | 1,000            | ,000  |
|                           | 404060001 | ,000             | 1,000 |
|                           | 404060002 | ,000             | ,000  |
|                           | 404310003 | ,000             | ,000  |
|                           | 404310004 | ,000             | ,000  |
|                           | 502300005 | ,000             | ,000  |
|                           | 502300006 | ,000             | ,000  |
|                           | 502300007 | ,000             | ,000  |
|                           | 502300214 | ,000             | ,000  |
|                           | 502300411 | ,000             | ,000  |
|                           | 502300415 | ,000             | ,000  |
|                           | 502300416 | ,000             | ,000  |
|                           | 502300811 | ,000             | ,000  |
|                           | 502300913 | ,000             | ,000  |
| weekday veckodag          | 1 måndag  |                  |       |
|                           | 2 tisdag  |                  |       |

## Categorical Variables Codings

|                           |           | Parameter coding |       |
|---------------------------|-----------|------------------|-------|
|                           |           | (24)             | (25)  |
| VASTY2 (SAIR*10000)+VASTY | 403073101 | ,000             | ,000  |
|                           | 403073102 | ,000             | ,000  |
|                           | 403073103 | ,000             | ,000  |
|                           | 403073202 | ,000             | ,000  |
|                           | 403073203 | ,000             | ,000  |
|                           | 403073204 | ,000             | ,000  |
|                           | 403073303 | ,000             | ,000  |
|                           | 403073651 | ,000             | ,000  |
|                           | 403073771 | ,000             | ,000  |
|                           | 403133102 | ,000             | ,000  |
|                           | 403133106 | ,000             | ,000  |
|                           | 403133107 | ,000             | ,000  |
|                           | 403133109 | ,000             | ,000  |
|                           | 403133202 | ,000             | ,000  |
|                           | 403133203 | ,000             | ,000  |
|                           | 403133204 | ,000             | ,000  |
|                           | 403133315 | ,000             | ,000  |
|                           | 403133322 | ,000             | ,000  |
|                           | 403133401 | ,000             | ,000  |
|                           | 403133402 | ,000             | ,000  |
|                           | 403133550 | ,000             | ,000  |
|                           | 403133772 | ,000             | ,000  |
|                           | 403135803 | ,000             | ,000  |
|                           | 404060001 | ,000             | ,000  |
|                           | 404060002 | 1,000            | ,000  |
|                           | 404310003 | ,000             | 1,000 |
|                           | 404310004 | ,000             | ,000  |
|                           | 502300005 | ,000             | ,000  |
|                           | 502300006 | ,000             | ,000  |
|                           | 502300007 | ,000             | ,000  |
|                           | 502300214 | ,000             | ,000  |
|                           | 502300411 | ,000             | ,000  |
|                           | 502300415 | ,000             | ,000  |
|                           | 502300416 | ,000             | ,000  |
|                           | 502300811 | ,000             | ,000  |
|                           | 502300913 | ,000             | ,000  |
| weekday veckodag          | 1 måndag  |                  |       |
|                           | 2 tisdag  |                  |       |

## Categorical Variables Codings

|                           |           | Parameter coding |       |
|---------------------------|-----------|------------------|-------|
|                           |           | (26)             | (27)  |
| VASTY2 (SAIR*10000)+VASTY | 403073101 | ,000             | ,000  |
|                           | 403073102 | ,000             | ,000  |
|                           | 403073103 | ,000             | ,000  |
|                           | 403073202 | ,000             | ,000  |
|                           | 403073203 | ,000             | ,000  |
|                           | 403073204 | ,000             | ,000  |
|                           | 403073303 | ,000             | ,000  |
|                           | 403073651 | ,000             | ,000  |
|                           | 403073771 | ,000             | ,000  |
|                           | 403133102 | ,000             | ,000  |
|                           | 403133106 | ,000             | ,000  |
|                           | 403133107 | ,000             | ,000  |
|                           | 403133109 | ,000             | ,000  |
|                           | 403133202 | ,000             | ,000  |
|                           | 403133203 | ,000             | ,000  |
|                           | 403133204 | ,000             | ,000  |
|                           | 403133315 | ,000             | ,000  |
|                           | 403133322 | ,000             | ,000  |
|                           | 403133401 | ,000             | ,000  |
|                           | 403133402 | ,000             | ,000  |
|                           | 403133550 | ,000             | ,000  |
|                           | 403133772 | ,000             | ,000  |
|                           | 403135803 | ,000             | ,000  |
|                           | 404060001 | ,000             | ,000  |
|                           | 404060002 | ,000             | ,000  |
|                           | 404310003 | ,000             | ,000  |
|                           | 404310004 | 1,000            | ,000  |
|                           | 502300005 | ,000             | 1,000 |
|                           | 502300006 | ,000             | ,000  |
|                           | 502300007 | ,000             | ,000  |
|                           | 502300214 | ,000             | ,000  |
|                           | 502300411 | ,000             | ,000  |
|                           | 502300415 | ,000             | ,000  |
|                           | 502300416 | ,000             | ,000  |
|                           | 502300811 | ,000             | ,000  |
|                           | 502300913 | ,000             | ,000  |
| weekday veckodag          | 1 måndag  |                  |       |
|                           | 2 tisdag  |                  |       |

## Categorical Variables Codings

|                           |           | Parameter coding |       |
|---------------------------|-----------|------------------|-------|
|                           |           | (28)             | (29)  |
| VASTY2 (SAIR*10000)+VASTY | 403073101 | ,000             | ,000  |
|                           | 403073102 | ,000             | ,000  |
|                           | 403073103 | ,000             | ,000  |
|                           | 403073202 | ,000             | ,000  |
|                           | 403073203 | ,000             | ,000  |
|                           | 403073204 | ,000             | ,000  |
|                           | 403073303 | ,000             | ,000  |
|                           | 403073651 | ,000             | ,000  |
|                           | 403073771 | ,000             | ,000  |
|                           | 403133102 | ,000             | ,000  |
|                           | 403133106 | ,000             | ,000  |
|                           | 403133107 | ,000             | ,000  |
|                           | 403133109 | ,000             | ,000  |
|                           | 403133202 | ,000             | ,000  |
|                           | 403133203 | ,000             | ,000  |
|                           | 403133204 | ,000             | ,000  |
|                           | 403133315 | ,000             | ,000  |
|                           | 403133322 | ,000             | ,000  |
|                           | 403133401 | ,000             | ,000  |
|                           | 403133402 | ,000             | ,000  |
|                           | 403133550 | ,000             | ,000  |
|                           | 403133772 | ,000             | ,000  |
|                           | 403135803 | ,000             | ,000  |
|                           | 404060001 | ,000             | ,000  |
|                           | 404060002 | ,000             | ,000  |
|                           | 404310003 | ,000             | ,000  |
|                           | 404310004 | ,000             | ,000  |
|                           | 502300005 | ,000             | ,000  |
|                           | 502300006 | 1,000            | ,000  |
|                           | 502300007 | ,000             | 1,000 |
|                           | 502300214 | ,000             | ,000  |
|                           | 502300411 | ,000             | ,000  |
|                           | 502300415 | ,000             | ,000  |
|                           | 502300416 | ,000             | ,000  |
|                           | 502300811 | ,000             | ,000  |
|                           | 502300913 | ,000             | ,000  |
| weekday veckodag          | 1 måndag  |                  |       |
|                           | 2 tisdag  |                  |       |

## Categorical Variables Codings

|                           |           | Parameter coding |       |
|---------------------------|-----------|------------------|-------|
|                           |           | (30)             | (31)  |
| VASTY2 (SAIR*10000)+VASTY | 403073101 | ,000             | ,000  |
|                           | 403073102 | ,000             | ,000  |
|                           | 403073103 | ,000             | ,000  |
|                           | 403073202 | ,000             | ,000  |
|                           | 403073203 | ,000             | ,000  |
|                           | 403073204 | ,000             | ,000  |
|                           | 403073303 | ,000             | ,000  |
|                           | 403073651 | ,000             | ,000  |
|                           | 403073771 | ,000             | ,000  |
|                           | 403133102 | ,000             | ,000  |
|                           | 403133106 | ,000             | ,000  |
|                           | 403133107 | ,000             | ,000  |
|                           | 403133109 | ,000             | ,000  |
|                           | 403133202 | ,000             | ,000  |
|                           | 403133203 | ,000             | ,000  |
|                           | 403133204 | ,000             | ,000  |
|                           | 403133315 | ,000             | ,000  |
|                           | 403133322 | ,000             | ,000  |
|                           | 403133401 | ,000             | ,000  |
|                           | 403133402 | ,000             | ,000  |
|                           | 403133550 | ,000             | ,000  |
|                           | 403133772 | ,000             | ,000  |
|                           | 403135803 | ,000             | ,000  |
|                           | 404060001 | ,000             | ,000  |
|                           | 404060002 | ,000             | ,000  |
|                           | 404310003 | ,000             | ,000  |
|                           | 404310004 | ,000             | ,000  |
|                           | 502300005 | ,000             | ,000  |
|                           | 502300006 | ,000             | ,000  |
|                           | 502300007 | ,000             | ,000  |
|                           | 502300214 | 1,000            | ,000  |
|                           | 502300411 | ,000             | 1,000 |
|                           | 502300415 | ,000             | ,000  |
|                           | 502300416 | ,000             | ,000  |
|                           | 502300811 | ,000             | ,000  |
|                           | 502300913 | ,000             | ,000  |
| weekday veckodag          | 1 måndag  |                  |       |
|                           | 2 tisdag  |                  |       |

## Categorical Variables Codings

|                           |           | Parameter coding |       |
|---------------------------|-----------|------------------|-------|
|                           |           | (32)             | (33)  |
| VASTY2 (SAIR*10000)+VASTY | 403073101 | ,000             | ,000  |
|                           | 403073102 | ,000             | ,000  |
|                           | 403073103 | ,000             | ,000  |
|                           | 403073202 | ,000             | ,000  |
|                           | 403073203 | ,000             | ,000  |
|                           | 403073204 | ,000             | ,000  |
|                           | 403073303 | ,000             | ,000  |
|                           | 403073651 | ,000             | ,000  |
|                           | 403073771 | ,000             | ,000  |
|                           | 403133102 | ,000             | ,000  |
|                           | 403133106 | ,000             | ,000  |
|                           | 403133107 | ,000             | ,000  |
|                           | 403133109 | ,000             | ,000  |
|                           | 403133202 | ,000             | ,000  |
|                           | 403133203 | ,000             | ,000  |
|                           | 403133204 | ,000             | ,000  |
|                           | 403133315 | ,000             | ,000  |
|                           | 403133322 | ,000             | ,000  |
|                           | 403133401 | ,000             | ,000  |
|                           | 403133402 | ,000             | ,000  |
|                           | 403133550 | ,000             | ,000  |
|                           | 403133772 | ,000             | ,000  |
|                           | 403135803 | ,000             | ,000  |
|                           | 404060001 | ,000             | ,000  |
|                           | 404060002 | ,000             | ,000  |
|                           | 404310003 | ,000             | ,000  |
|                           | 404310004 | ,000             | ,000  |
|                           | 502300005 | ,000             | ,000  |
|                           | 502300006 | ,000             | ,000  |
|                           | 502300007 | ,000             | ,000  |
|                           | 502300214 | ,000             | ,000  |
|                           | 502300411 | ,000             | ,000  |
|                           | 502300415 | 1,000            | ,000  |
|                           | 502300416 | ,000             | 1,000 |
|                           | 502300811 | ,000             | ,000  |
|                           | 502300913 | ,000             | ,000  |
| weekday veckodag          | 1 måndag  |                  |       |
|                           | 2 tisdag  |                  |       |



## Categorical Variables Codings

|                           |           | Parameter coding |       |
|---------------------------|-----------|------------------|-------|
|                           |           | (34)             | (35)  |
| VASTY2 (SAIR*10000)+VASTY | 403073101 | ,000             | ,000  |
|                           | 403073102 | ,000             | ,000  |
|                           | 403073103 | ,000             | ,000  |
|                           | 403073202 | ,000             | ,000  |
|                           | 403073203 | ,000             | ,000  |
|                           | 403073204 | ,000             | ,000  |
|                           | 403073303 | ,000             | ,000  |
|                           | 403073651 | ,000             | ,000  |
|                           | 403073771 | ,000             | ,000  |
|                           | 403133102 | ,000             | ,000  |
|                           | 403133106 | ,000             | ,000  |
|                           | 403133107 | ,000             | ,000  |
|                           | 403133109 | ,000             | ,000  |
|                           | 403133202 | ,000             | ,000  |
|                           | 403133203 | ,000             | ,000  |
|                           | 403133204 | ,000             | ,000  |
|                           | 403133315 | ,000             | ,000  |
|                           | 403133322 | ,000             | ,000  |
|                           | 403133401 | ,000             | ,000  |
|                           | 403133402 | ,000             | ,000  |
|                           | 403133550 | ,000             | ,000  |
|                           | 403133772 | ,000             | ,000  |
|                           | 403135803 | ,000             | ,000  |
|                           | 404060001 | ,000             | ,000  |
|                           | 404060002 | ,000             | ,000  |
|                           | 404310003 | ,000             | ,000  |
|                           | 404310004 | ,000             | ,000  |
|                           | 502300005 | ,000             | ,000  |
|                           | 502300006 | ,000             | ,000  |
|                           | 502300007 | ,000             | ,000  |
|                           | 502300214 | ,000             | ,000  |
|                           | 502300411 | ,000             | ,000  |
|                           | 502300415 | ,000             | ,000  |
|                           | 502300416 | ,000             | ,000  |
|                           | 502300811 | 1,000            | ,000  |
|                           | 502300913 | ,000             | 1,000 |
| weekday veckodag          | 1 måndag  |                  |       |
|                           | 2 tisdag  |                  |       |

## Categorical Variables Codings

|                           |                                         | Frequency | Parameter |
|---------------------------|-----------------------------------------|-----------|-----------|
|                           |                                         |           | (1)       |
|                           | 3 onsdag                                | 1800      | ,000      |
|                           | 4 torsdag                               | 1794      | ,000      |
|                           | 5 fredag                                | 1788      | ,000      |
|                           | 6 lördag                                | 1735      | ,000      |
|                           | 7 söndag                                | 1741      | ,000      |
| season säsong/period      | 1 januari-mars                          | 3182      | ,000      |
|                           | 2 april-maj                             | 2127      | 1,000     |
|                           | 3 juni-augusti                          | 2911      | ,000      |
|                           | 4 september-oktober                     | 2144      | ,000      |
|                           | 5 november-december                     | 2111      | ,000      |
| bv1 belastning vs paoncil | 1 medelbelastning                       | 5380      | ,000      |
|                           | 2 underbelastning                       | 3222      | 1,000     |
|                           | 3 överbelastning                        | 3873      | ,000      |
| holiday större helg       | 1 ingen större helg                     | 12078     | ,000      |
|                           | 2 större helg (påsk/midsommar/julonyår) | 397       | 1,000     |

## Categorical Variables Codings

|                           |                                         | Parameter coding |       |
|---------------------------|-----------------------------------------|------------------|-------|
|                           |                                         | (2)              | (3)   |
|                           | 3 onsdag                                | 1,000            | ,000  |
|                           | 4 torsdag                               | ,000             | 1,000 |
|                           | 5 fredag                                | ,000             | ,000  |
|                           | 6 lördag                                | ,000             | ,000  |
|                           | 7 söndag                                | ,000             | ,000  |
| season säsong/period      | 1 januari-mars                          | ,000             | ,000  |
|                           | 2 april-maj                             | ,000             | ,000  |
|                           | 3 juni-augusti                          | 1,000            | ,000  |
|                           | 4 september-oktober                     | ,000             | 1,000 |
|                           | 5 november-december                     | ,000             | ,000  |
| bv1 belastning vs paoncil | 1 medelbelastning                       | ,000             |       |
|                           | 2 underbelastning                       | ,000             |       |
|                           | 3 överbelastning                        | 1,000            |       |
| holiday större helg       | 1 ingen större helg                     |                  |       |
|                           | 2 större helg (påsk/midsommar/julonyår) |                  |       |

## Categorical Variables Codings

|                           |                                         | Parameter coding |       |
|---------------------------|-----------------------------------------|------------------|-------|
|                           |                                         | (4)              | (5)   |
| season säsong/period      | 3 onsdag                                | ,000             | ,000  |
|                           | 4 torsdag                               | ,000             | ,000  |
|                           | 5 fredag                                | 1,000            | ,000  |
|                           | 6 lördag                                | ,000             | 1,000 |
|                           | 7 söndag                                | ,000             | ,000  |
|                           | 1 januari-mars                          | ,000             |       |
|                           | 2 april-maj                             | ,000             |       |
| bv1 belastning vs paoncil | 3 juni-augusti                          | ,000             |       |
|                           | 4 september-oktober                     | ,000             |       |
|                           | 5 november-december                     | 1,000            |       |
|                           | 1 medelbelastning                       |                  |       |
| holiday större helg       | 2 underbelastning                       |                  |       |
|                           | 3 överbelastning                        |                  |       |
|                           | 1 ingen större helg                     |                  |       |
|                           | 2 större helg (påsk/midsommar/julonyår) |                  |       |

## Categorical Variables Codings

|                           |                                         | Parameter coding |     |
|---------------------------|-----------------------------------------|------------------|-----|
|                           |                                         | (6)              | (7) |
| season säsong/period      | 3 onsdag                                | ,000             |     |
|                           | 4 torsdag                               | ,000             |     |
|                           | 5 fredag                                | ,000             |     |
|                           | 6 lördag                                | ,000             |     |
|                           | 7 söndag                                | 1,000            |     |
|                           | 1 januari-mars                          |                  |     |
|                           | 2 april-maj                             |                  |     |
| bv1 belastning vs paoncil | 3 juni-augusti                          |                  |     |
|                           | 4 september-oktober                     |                  |     |
|                           | 5 november-december                     |                  |     |
|                           | 1 medelbelastning                       |                  |     |
| holiday större helg       | 2 underbelastning                       |                  |     |
|                           | 3 överbelastning                        |                  |     |
|                           | 1 ingen större helg                     |                  |     |
|                           | 2 större helg (påsk/midsommar/julonyår) |                  |     |

## Categorical Variables Codings

|                           |                                         | Parameter coding |     |
|---------------------------|-----------------------------------------|------------------|-----|
|                           |                                         | (8)              | (9) |
| season säsong/period      | 3 onsdag                                |                  |     |
|                           | 4 torsdag                               |                  |     |
|                           | 5 fredag                                |                  |     |
|                           | 6 lördag                                |                  |     |
|                           | 7 söndag                                |                  |     |
|                           | 1 januari-mars                          |                  |     |
|                           | 2 april-maj                             |                  |     |
| bv1 belastning vs paoncil | 3 juni-augusti                          |                  |     |
|                           | 4 september-oktober                     |                  |     |
|                           | 5 november-december                     |                  |     |
| holiday större helg       | 1 ingen större helg                     |                  |     |
|                           | 2 större helg (påsk/midsommar/julonyår) |                  |     |

## Categorical Variables Codings

|                           |                                         | Parameter coding |      |
|---------------------------|-----------------------------------------|------------------|------|
|                           |                                         | (10)             | (11) |
| season säsong/period      | 3 onsdag                                |                  |      |
|                           | 4 torsdag                               |                  |      |
|                           | 5 fredag                                |                  |      |
|                           | 6 lördag                                |                  |      |
|                           | 7 söndag                                |                  |      |
|                           | 1 januari-mars                          |                  |      |
|                           | 2 april-maj                             |                  |      |
| bv1 belastning vs paoncil | 3 juni-augusti                          |                  |      |
|                           | 4 september-oktober                     |                  |      |
|                           | 5 november-december                     |                  |      |
| holiday större helg       | 1 ingen större helg                     |                  |      |
|                           | 2 större helg (påsk/midsommar/julonyår) |                  |      |

## Categorical Variables Codings

|                           |                                         | Parameter coding |      |
|---------------------------|-----------------------------------------|------------------|------|
|                           |                                         | (12)             | (13) |
| season säsong/period      | 3 onsdag                                |                  |      |
|                           | 4 torsdag                               |                  |      |
|                           | 5 fredag                                |                  |      |
|                           | 6 lördag                                |                  |      |
|                           | 7 söndag                                |                  |      |
|                           | 1 januari-mars                          |                  |      |
|                           | 2 april-maj                             |                  |      |
| bv1 belastning vs paoncil | 3 juni-augusti                          |                  |      |
|                           | 4 september-oktober                     |                  |      |
|                           | 5 november-december                     |                  |      |
| holiday större helg       | 1 ingen större helg                     |                  |      |
|                           | 2 större helg (påsk/midsommar/julonyår) |                  |      |

## Categorical Variables Codings

|                           |                                         | Parameter coding |      |
|---------------------------|-----------------------------------------|------------------|------|
|                           |                                         | (14)             | (15) |
| season säsong/period      | 3 onsdag                                |                  |      |
|                           | 4 torsdag                               |                  |      |
|                           | 5 fredag                                |                  |      |
|                           | 6 lördag                                |                  |      |
|                           | 7 söndag                                |                  |      |
|                           | 1 januari-mars                          |                  |      |
|                           | 2 april-maj                             |                  |      |
| bv1 belastning vs paoncil | 3 juni-augusti                          |                  |      |
|                           | 4 september-oktober                     |                  |      |
|                           | 5 november-december                     |                  |      |
| holiday större helg       | 1 ingen större helg                     |                  |      |
|                           | 2 större helg (påsk/midsommar/julonyår) |                  |      |

## Categorical Variables Codings

|                           |                                         | Parameter coding |      |
|---------------------------|-----------------------------------------|------------------|------|
|                           |                                         | (16)             | (17) |
| season säsong/period      | 3 onsdag                                |                  |      |
|                           | 4 torsdag                               |                  |      |
|                           | 5 fredag                                |                  |      |
|                           | 6 lördag                                |                  |      |
|                           | 7 söndag                                |                  |      |
|                           | 1 januari-mars                          |                  |      |
|                           | 2 april-maj                             |                  |      |
| bv1 belastning vs paoncil | 3 juni-augusti                          |                  |      |
|                           | 4 september-oktober                     |                  |      |
|                           | 5 november-december                     |                  |      |
| holiday större helg       | 1 ingen större helg                     |                  |      |
|                           | 2 större helg (påsk/midsommar/julonyår) |                  |      |

## Categorical Variables Codings

|                           |                                         | Parameter coding |      |
|---------------------------|-----------------------------------------|------------------|------|
|                           |                                         | (18)             | (19) |
| season säsong/period      | 3 onsdag                                |                  |      |
|                           | 4 torsdag                               |                  |      |
|                           | 5 fredag                                |                  |      |
|                           | 6 lördag                                |                  |      |
|                           | 7 söndag                                |                  |      |
|                           | 1 januari-mars                          |                  |      |
|                           | 2 april-maj                             |                  |      |
| bv1 belastning vs paoncil | 3 juni-augusti                          |                  |      |
|                           | 4 september-oktober                     |                  |      |
|                           | 5 november-december                     |                  |      |
| holiday större helg       | 1 ingen större helg                     |                  |      |
|                           | 2 större helg (påsk/midsommar/julonyår) |                  |      |

## Categorical Variables Codings

|                           |                                         | Parameter coding |      |
|---------------------------|-----------------------------------------|------------------|------|
|                           |                                         | (20)             | (21) |
| season säsong/period      | 3 onsdag                                |                  |      |
|                           | 4 torsdag                               |                  |      |
|                           | 5 fredag                                |                  |      |
|                           | 6 lördag                                |                  |      |
|                           | 7 söndag                                |                  |      |
|                           | 1 januari-mars                          |                  |      |
|                           | 2 april-maj                             |                  |      |
| bv1 belastning vs paoncil | 3 juni-augusti                          |                  |      |
|                           | 4 september-oktober                     |                  |      |
|                           | 5 november-december                     |                  |      |
| holiday större helg       | 1 ingen större helg                     |                  |      |
|                           | 2 större helg (påsk/midsommar/julonyår) |                  |      |
|                           |                                         |                  |      |

## Categorical Variables Codings

|                           |                                         | Parameter coding |      |
|---------------------------|-----------------------------------------|------------------|------|
|                           |                                         | (22)             | (23) |
| season säsong/period      | 3 onsdag                                |                  |      |
|                           | 4 torsdag                               |                  |      |
|                           | 5 fredag                                |                  |      |
|                           | 6 lördag                                |                  |      |
|                           | 7 söndag                                |                  |      |
|                           | 1 januari-mars                          |                  |      |
|                           | 2 april-maj                             |                  |      |
| bv1 belastning vs paoncil | 3 juni-augusti                          |                  |      |
|                           | 4 september-oktober                     |                  |      |
|                           | 5 november-december                     |                  |      |
| holiday större helg       | 1 ingen större helg                     |                  |      |
|                           | 2 större helg (påsk/midsommar/julonyår) |                  |      |
|                           |                                         |                  |      |

## Categorical Variables Codings

|                           |                                         | Parameter coding |      |
|---------------------------|-----------------------------------------|------------------|------|
|                           |                                         | (24)             | (25) |
| season säsong/period      | 3 onsdag                                |                  |      |
|                           | 4 torsdag                               |                  |      |
|                           | 5 fredag                                |                  |      |
|                           | 6 lördag                                |                  |      |
|                           | 7 söndag                                |                  |      |
|                           | 1 januari-mars                          |                  |      |
|                           | 2 april-maj                             |                  |      |
| bv1 belastning vs paoncil | 3 juni-augusti                          |                  |      |
|                           | 4 september-oktober                     |                  |      |
|                           | 5 november-december                     |                  |      |
| holiday större helg       | 1 ingen större helg                     |                  |      |
|                           | 2 större helg (påsk/midsommar/julonyår) |                  |      |

## Categorical Variables Codings

|                           |                                         | Parameter coding |      |
|---------------------------|-----------------------------------------|------------------|------|
|                           |                                         | (26)             | (27) |
| season säsong/period      | 3 onsdag                                |                  |      |
|                           | 4 torsdag                               |                  |      |
|                           | 5 fredag                                |                  |      |
|                           | 6 lördag                                |                  |      |
|                           | 7 söndag                                |                  |      |
|                           | 1 januari-mars                          |                  |      |
|                           | 2 april-maj                             |                  |      |
| bv1 belastning vs paoncil | 3 juni-augusti                          |                  |      |
|                           | 4 september-oktober                     |                  |      |
|                           | 5 november-december                     |                  |      |
| holiday större helg       | 1 ingen större helg                     |                  |      |
|                           | 2 större helg (påsk/midsommar/julonyår) |                  |      |



1  
2  
3  
4  
5  
6  
7  
8  
9  
10  
11  
12  
13  
14  
15  
16  
17  
18  
19  
20  
21  
22  
23  
24  
25  
26  
27  
28  
29  
30  
31  
32  
33  
34  
35  
36  
37  
38  
39  
40  
41  
42  
43  
44  
45  
46  
47  
48  
49  
50  
51  
52  
53  
54  
55  
56  
57  
58  
59  
60

**Categorical Variables Codings**

|                           |                                         | Parameter coding |      |
|---------------------------|-----------------------------------------|------------------|------|
|                           |                                         | (28)             | (29) |
| season säsong/period      | 3 onsdag                                |                  |      |
|                           | 4 torsdag                               |                  |      |
|                           | 5 fredag                                |                  |      |
|                           | 6 lördag                                |                  |      |
|                           | 7 söndag                                |                  |      |
|                           | 1 januari-mars                          |                  |      |
|                           | 2 april-maj                             |                  |      |
| bv1 belastning vs paoncil | 3 juni-augusti                          |                  |      |
|                           | 4 september-oktober                     |                  |      |
|                           | 5 november-december                     |                  |      |
| holiday större helg       | 1 ingen större helg                     |                  |      |
|                           | 2 större helg (påsk/midsommar/julonyår) |                  |      |

**Categorical Variables Codings**

|                           |                                         | Parameter coding |      |
|---------------------------|-----------------------------------------|------------------|------|
|                           |                                         | (30)             | (31) |
| season säsong/period      | 3 onsdag                                |                  |      |
|                           | 4 torsdag                               |                  |      |
|                           | 5 fredag                                |                  |      |
|                           | 6 lördag                                |                  |      |
|                           | 7 söndag                                |                  |      |
|                           | 1 januari-mars                          |                  |      |
|                           | 2 april-maj                             |                  |      |
| bv1 belastning vs paoncil | 3 juni-augusti                          |                  |      |
|                           | 4 september-oktober                     |                  |      |
|                           | 5 november-december                     |                  |      |
| holiday större helg       | 1 ingen större helg                     |                  |      |
|                           | 2 större helg (påsk/midsommar/julonyår) |                  |      |

## Categorical Variables Codings

|                           |                                         | Parameter coding |      |
|---------------------------|-----------------------------------------|------------------|------|
|                           |                                         | (32)             | (33) |
| season säsong/period      | 3 onsdag                                |                  |      |
|                           | 4 torsdag                               |                  |      |
|                           | 5 fredag                                |                  |      |
|                           | 6 lördag                                |                  |      |
|                           | 7 söndag                                |                  |      |
|                           | 1 januari-mars                          |                  |      |
|                           | 2 april-maj                             |                  |      |
| bv1 belastning vs paoncil | 3 juni-augusti                          |                  |      |
|                           | 4 september-oktober                     |                  |      |
|                           | 5 november-december                     |                  |      |
| holiday större helg       | 1 ingen större helg                     |                  |      |
|                           | 2 större helg (påsk/midsommar/julonyår) |                  |      |

## Categorical Variables Codings

|                           |                                         | Parameter coding |      |
|---------------------------|-----------------------------------------|------------------|------|
|                           |                                         | (34)             | (35) |
| season säsong/period      | 3 onsdag                                |                  |      |
|                           | 4 torsdag                               |                  |      |
|                           | 5 fredag                                |                  |      |
|                           | 6 lördag                                |                  |      |
|                           | 7 söndag                                |                  |      |
|                           | 1 januari-mars                          |                  |      |
|                           | 2 april-maj                             |                  |      |
| bv1 belastning vs paoncil | 3 juni-augusti                          |                  |      |
|                           | 4 september-oktober                     |                  |      |
|                           | 5 november-december                     |                  |      |
| holiday större helg       | 1 ingen större helg                     |                  |      |
|                           | 2 större helg (påsk/midsommar/julonyår) |                  |      |

**Block 0: Beginning Block**

Classification Table<sup>a,b</sup>

| Observed           |                              |                     | Predicted                    |                     |
|--------------------|------------------------------|---------------------|------------------------------|---------------------|
|                    |                              |                     | hand01 händelse nej eller ja |                     |
|                    |                              |                     | 0 ingen händelse             | 1 minst en händelse |
| Step 0             | hand01 händelse nej eller ja | 0 ingen händelse    | 11108                        | 0                   |
|                    |                              | 1 minst en händelse | 1367                         | 0                   |
| Overall Percentage |                              |                     |                              |                     |

Classification Table<sup>a,b</sup>

| Observed           |                              |                     | Predicted          |
|--------------------|------------------------------|---------------------|--------------------|
|                    |                              |                     | Percentage Correct |
| Step 0             | hand01 händelse nej eller ja | 0 ingen händelse    | 100,0              |
|                    |                              | 1 minst en händelse | ,0                 |
| Overall Percentage |                              |                     | 89,0               |

a. Constant is included in the model.

b. The cut value is ,500

Variables in the Equation

|                 | B      | S.E. | Wald     | df | Sig. | Exp(B) |
|-----------------|--------|------|----------|----|------|--------|
| Step 0 Constant | -2,095 | ,029 | 5342,584 | 1  | ,000 | ,123   |

## Variables not in the Equation

|        |           |            | Score   | df | Sig. |
|--------|-----------|------------|---------|----|------|
| Step 0 | Variables | bv1        | 64,197  | 2  | ,000 |
|        |           | bv1(1)     | 48,244  | 1  | ,000 |
|        |           | bv1(2)     | 41,190  | 1  | ,000 |
|        |           | VASTY2     | 541,214 | 35 | ,000 |
|        |           | VASTY2(1)  | 1,169   | 1  | ,280 |
|        |           | VASTY2(2)  | 87,511  | 1  | ,000 |
|        |           | VASTY2(3)  | 13,995  | 1  | ,000 |
|        |           | VASTY2(4)  | ,464    | 1  | ,496 |
|        |           | VASTY2(5)  | 5,526   | 1  | ,019 |
|        |           | VASTY2(6)  | 19,435  | 1  | ,000 |
|        |           | VASTY2(7)  | 86,074  | 1  | ,000 |
|        |           | VASTY2(8)  | 1,043   | 1  | ,307 |
|        |           | VASTY2(9)  | ,408    | 1  | ,523 |
|        |           | VASTY2(10) | 58,583  | 1  | ,000 |
|        |           | VASTY2(11) | 33,445  | 1  | ,000 |
|        |           | VASTY2(12) | ,029    | 1  | ,865 |
|        |           | VASTY2(13) | 33,445  | 1  | ,000 |
|        |           | VASTY2(14) | 4,163   | 1  | ,041 |
|        |           | VASTY2(15) | ,464    | 1  | ,496 |
|        |           | VASTY2(16) | ,763    | 1  | ,382 |
|        |           | VASTY2(17) | 24,320  | 1  | ,000 |
|        |           | VASTY2(18) | 17,742  | 1  | ,000 |
|        |           | VASTY2(19) | 27,791  | 1  | ,000 |
|        |           | VASTY2(20) | ,015    | 1  | ,902 |
|        |           | VASTY2(21) | 2,890   | 1  | ,089 |
|        |           | VASTY2(22) | ,462    | 1  | ,497 |
|        |           | VASTY2(23) | 15,306  | 1  | ,000 |
|        |           | VASTY2(24) | 12,594  | 1  | ,000 |
|        |           | VASTY2(25) | ,128    | 1  | ,720 |
|        |           | VASTY2(26) | 12,864  | 1  | ,000 |
|        |           | VASTY2(27) | 24,439  | 1  | ,000 |
|        |           | VASTY2(28) | 9,963   | 1  | ,002 |
|        |           | VASTY2(29) | 18,184  | 1  | ,000 |
|        |           | VASTY2(30) | ,486    | 1  | ,486 |
|        |           | VASTY2(31) | 6,400   | 1  | ,011 |
|        |           | VASTY2(32) | 1,626   | 1  | ,202 |
|        |           | VASTY2(33) | 1,336   | 1  | ,248 |
|        |           | VASTY2(34) | 29,489  | 1  | ,000 |
|        |           | VASTY2(35) | 3,668   | 1  | ,055 |
|        |           | weekday    | 20,834  | 6  | ,002 |
|        |           | weekday(1) | ,196    | 1  | ,658 |
|        |           | weekday(2) | ,004    | 1  | ,951 |
|        |           | weekday(3) | 1,386   | 1  | ,239 |

## Variables not in the Equation

|                    | Score   | df | Sig. |
|--------------------|---------|----|------|
| weekday(4)         | ,820    | 1  | ,365 |
| weekday(5)         | 20,097  | 1  | ,000 |
| weekday(6)         | 1,022   | 1  | ,312 |
| holiday(1)         | 4,862   | 1  | ,027 |
| season             | 15,673  | 4  | ,003 |
| season(1)          | ,214    | 1  | ,643 |
| season(2)          | 8,095   | 1  | ,004 |
| season(3)          | 10,213  | 1  | ,001 |
| season(4)          | ,313    | 1  | ,576 |
| Overall Statistics | 611,563 | 48 | ,000 |

## Block 1: Method = Enter

## Omnibus Tests of Model Coefficients

|             | Chi-square | df | Sig. |
|-------------|------------|----|------|
| Step 1 Step | 612,758    | 48 | ,000 |
| Block       | 612,758    | 48 | ,000 |
| Model       | 612,758    | 48 | ,000 |

## Model Summary

| Step | -2 Log likelihood     | Cox & Snell R Square | Nagelkerke R Square |
|------|-----------------------|----------------------|---------------------|
| 1    | 8010,825 <sup>a</sup> | ,048                 | ,096                |

a. Estimation terminated at iteration number 6 because parameter estimates changed by less than ,001.

Classification Table<sup>a</sup>

| Observed           |                              | Predicted           |                     |
|--------------------|------------------------------|---------------------|---------------------|
|                    |                              | 0 ingen hændelse    | 1 minst en hændelse |
| Step 1             | hand01 hændelse nej eller ja | 0 ingen hændelse    | 11108               |
|                    |                              | 1 minst en hændelse | 1367                |
| Overall Percentage |                              |                     |                     |

Classification Table<sup>a</sup>

| Observed           |                              | Predicted          |
|--------------------|------------------------------|--------------------|
|                    |                              | Percentage Correct |
| Step 1             | hand01 hændelse nej eller ja | 100,0              |
|                    |                              | ,0                 |
| Overall Percentage |                              | 89,0               |

a. The cut value is ,500

## Variables in the Equation

|                         | B      | S.E. | Wald    | df | Sig. | Exp(B) |
|-------------------------|--------|------|---------|----|------|--------|
| Step 1 <sup>a</sup> bv1 |        |      | 25,202  | 2  | ,000 |        |
| bv1(1)                  | -,238  | ,085 | 7,908   | 1  | ,005 | ,788   |
| bv1(2)                  | ,213   | ,070 | 9,314   | 1  | ,002 | 1,237  |
| VASTY2                  |        |      | 436,249 | 35 | ,000 |        |
| VASTY2(1)               | ,338   | ,240 | 1,977   | 1  | ,160 | 1,402  |
| VASTY2(2)               | 1,195  | ,217 | 30,330  | 1  | ,000 | 3,303  |
| VASTY2(3)               | -,843  | ,304 | 7,692   | 1  | ,006 | ,431   |
| VASTY2(4)               | ,164   | ,244 | ,454    | 1  | ,501 | 1,178  |
| VASTY2(5)               | -,386  | ,282 | 1,869   | 1  | ,172 | ,680   |
| VASTY2(6)               | -1,046 | ,328 | 10,166  | 1  | ,001 | ,351   |
| VASTY2(7)               | 1,064  | ,221 | 23,198  | 1  | ,000 | 2,897  |
| VASTY2(8)               | ,264   | ,241 | 1,203   | 1  | ,273 | 1,302  |
| VASTY2(9)               | ,188   | ,247 | ,582    | 1  | ,446 | 1,207  |
| VASTY2(10)              | 1,022  | ,220 | 21,642  | 1  | ,000 | 2,779  |
| VASTY2(11)              | ,876   | ,223 | 15,386  | 1  | ,000 | 2,402  |
| VASTY2(12)              | ,081   | ,248 | ,105    | 1  | ,746 | 1,084  |
| VASTY2(13)              | ,765   | ,225 | 11,565  | 1  | ,001 | 2,149  |
| VASTY2(14)              | -,291  | ,268 | 1,179   | 1  | ,278 | ,748   |
| VASTY2(15)              | ,230   | ,242 | ,902    | 1  | ,342 | 1,259  |
| VASTY2(16)              | ,258   | ,289 | ,794    | 1  | ,373 | 1,294  |
| VASTY2(17)              | -1,183 | ,356 | 11,055  | 1  | ,001 | ,306   |
| VASTY2(18)              | -,880  | ,320 | 7,550   | 1  | ,006 | ,415   |
| VASTY2(19)              | -1,221 | ,387 | 9,977   | 1  | ,002 | ,295   |
| VASTY2(20)              | ,024   | ,262 | ,008    | 1  | ,927 | 1,024  |
| VASTY2(21)              | -,182  | ,263 | ,481    | 1  | ,488 | ,833   |
| VASTY2(22)              | ,150   | ,253 | ,351    | 1  | ,553 | 1,162  |
| VASTY2(23)              | ,711   | ,228 | 9,706   | 1  | ,002 | 2,036  |
| VASTY2(24)              | ,529   | ,230 | 5,282   | 1  | ,022 | 1,698  |
| VASTY2(25)              | ,078   | ,265 | ,087    | 1  | ,768 | 1,081  |
| VASTY2(26)              | -,900  | ,337 | 7,120   | 1  | ,008 | ,407   |
| VASTY2(27)              | -1,309 | ,356 | 13,477  | 1  | ,000 | ,270   |
| VASTY2(28)              | -,959  | ,372 | 6,656   | 1  | ,010 | ,383   |
| VASTY2(29)              | -,955  | ,320 | 8,898   | 1  | ,003 | ,385   |
| VASTY2(30)              | -,011  | ,252 | ,002    | 1  | ,964 | ,989   |
| VASTY2(31)              | ,501   | ,234 | 4,596   | 1  | ,032 | 1,651  |
| VASTY2(32)              | -,044  | ,260 | ,029    | 1  | ,864 | ,957   |
| VASTY2(33)              | -,030  | ,258 | ,013    | 1  | ,908 | ,971   |
| VASTY2(34)              | -1,577 | ,401 | 15,468  | 1  | ,000 | ,207   |
| VASTY2(35)              | ,324   | ,245 | 1,752   | 1  | ,186 | 1,382  |
| weekday                 |        |      | 18,335  | 6  | ,005 |        |

## Variables in the Equation

|                     |            | 95% C.I. for EXP(B) |       |
|---------------------|------------|---------------------|-------|
|                     |            | Lower               | Upper |
| Step 1 <sup>a</sup> | bv1        |                     |       |
|                     | bv1(1)     | ,668                | ,930  |
|                     | bv1(2)     | 1,079               | 1,418 |
|                     | VASTY2     |                     |       |
|                     | VASTY2(1)  | ,875                | 2,245 |
|                     | VASTY2(2)  | 2,159               | 5,054 |
|                     | VASTY2(3)  | ,237                | ,781  |
|                     | VASTY2(4)  | ,731                | 1,900 |
|                     | VASTY2(5)  | ,391                | 1,182 |
|                     | VASTY2(6)  | ,185                | ,668  |
|                     | VASTY2(7)  | 1,879               | 4,467 |
|                     | VASTY2(8)  | ,812                | 2,086 |
|                     | VASTY2(9)  | ,744                | 1,958 |
|                     | VASTY2(10) | 1,807               | 4,275 |
|                     | VASTY2(11) | 1,550               | 3,721 |
|                     | VASTY2(12) | ,666                | 1,764 |
|                     | VASTY2(13) | 1,383               | 3,340 |
|                     | VASTY2(14) | ,442                | 1,264 |
|                     | VASTY2(15) | ,783                | 2,025 |
|                     | VASTY2(16) | ,734                | 2,280 |
|                     | VASTY2(17) | ,152                | ,615  |
|                     | VASTY2(18) | ,221                | ,777  |
|                     | VASTY2(19) | ,138                | ,629  |
|                     | VASTY2(20) | ,613                | 1,711 |
|                     | VASTY2(21) | ,498                | 1,395 |
|                     | VASTY2(22) | ,708                | 1,907 |
|                     | VASTY2(23) | 1,302               | 3,183 |
|                     | VASTY2(24) | 1,081               | 2,667 |
|                     | VASTY2(25) | ,644                | 1,816 |
|                     | VASTY2(26) | ,210                | ,788  |
|                     | VASTY2(27) | ,134                | ,543  |
|                     | VASTY2(28) | ,185                | ,794  |
|                     | VASTY2(29) | ,206                | ,721  |
|                     | VASTY2(30) | ,603                | 1,622 |
|                     | VASTY2(31) | 1,044               | 2,611 |
|                     | VASTY2(32) | ,575                | 1,592 |
|                     | VASTY2(33) | ,586                | 1,609 |
|                     | VASTY2(34) | ,094                | ,453  |
|                     | VASTY2(35) | ,856                | 2,232 |
|                     | weekday    |                     |       |

Variables in the Equation

|            | B      | S.E. | Wald    | df | Sig. | Exp(B) |
|------------|--------|------|---------|----|------|--------|
| weekday(1) | -,032  | ,107 | ,091    | 1  | ,763 | ,968   |
| weekday(2) | -,064  | ,108 | ,349    | 1  | ,555 | ,938   |
| weekday(3) | ,018   | ,107 | ,028    | 1  | ,867 | 1,018  |
| weekday(4) | ,026   | ,107 | ,058    | 1  | ,810 | 1,026  |
| weekday(5) | -,396  | ,119 | 11,109  | 1  | ,001 | ,673   |
| weekday(6) | ,050   | ,108 | ,212    | 1  | ,645 | 1,051  |
| holiday(1) | -,468  | ,201 | 5,407   | 1  | ,020 | ,626   |
| season     |        |      | 13,381  | 4  | ,010 |        |
| season(1)  | -,070  | ,092 | ,577    | 1  | ,448 | ,932   |
| season(2)  | -,170  | ,088 | 3,763   | 1  | ,052 | ,843   |
| season(3)  | ,162   | ,088 | 3,384   | 1  | ,066 | 1,176  |
| season(4)  | -,024  | ,093 | ,065    | 1  | ,798 | ,976   |
| Constant   | -2,147 | ,202 | 113,333 | 1  | ,000 | ,117   |

Variables in the Equation

|            | 95% C.I. for EXP(B) |       |
|------------|---------------------|-------|
|            | Lower               | Upper |
| weekday(1) | ,784                | 1,195 |
| weekday(2) | ,759                | 1,160 |
| weekday(3) | ,826                | 1,255 |
| weekday(4) | ,832                | 1,266 |
| weekday(5) | ,533                | ,850  |
| weekday(6) | ,850                | 1,299 |
| holiday(1) | ,422                | ,929  |
| season     |                     |       |
| season(1)  | ,778                | 1,117 |
| season(2)  | ,710                | 1,002 |
| season(3)  | ,989                | 1,397 |
| season(4)  | ,813                | 1,173 |
| Constant   |                     |       |

a. Variable(s) entered on step 1: bv1, VASTY2, weekday, holiday, season.

LOGISTIC REGRESSION VARIABLES hand01

/METHOD=ENTER bv2 VASTY2 weekday holiday season

/CONTRAST (bv2)=Indicator(1)

/CONTRAST (VASTY2)=Indicator(1)

/CONTRAST (weekday)=Indicator(1)

/CONTRAST (holiday)=Indicator(1)

/CONTRAST (season)=Indicator(1)

/PRINT=CI(95)

/CRITERIA=PIN(0.05) POUT(0.10) ITERATE(20) CUT(0.5).



## Logistic Regression

[DataSet6] C:\cWordjan\Rafaela\_VCS\alla\_tillsammans\abo\_bjo\_vasa\_v1.sav

### Case Processing Summary

| Unweighted Cases <sup>a</sup> |                      | N     | Percent |
|-------------------------------|----------------------|-------|---------|
| Selected Cases                | Included in Analysis | 12475 | 100,0   |
|                               | Missing Cases        | 0     | ,0      |
|                               | Total                | 12475 | 100,0   |
| Unselected Cases              |                      | 0     | ,0      |
| Total                         |                      | 12475 | 100,0   |

a. If weight is in effect, see classification table for the total number of cases.

### Dependent Variable Encoding

| Original Value      | Internal Value |
|---------------------|----------------|
| 0 ingen händelse    | 0              |
| 1 minst en händelse | 1              |

### Categorical Variables Codings

|                           | Frequency |
|---------------------------|-----------|
| VASTY2 (SAIR*10000)+VASTY | 365       |
| 403073101                 | 362       |
| 403073102                 | 365       |
| 403073103                 | 365       |
| 403073202                 | 365       |
| 403073203                 | 365       |
| 403073204                 | 330       |
| 403073303                 | 364       |
| 403073651                 | 362       |
| 403073771                 | 365       |
| 403133102                 | 341       |
| 403133106                 | 365       |
| 403133107                 | 365       |
| 403133109                 | 365       |
| 403133202                 | 365       |
| 403133203                 | 365       |
| 403133204                 | 365       |
| 403133315                 | 177       |
| 403133322                 | 365       |
| 403133401                 | 362       |
| 403133402                 | 365       |
| 403133550                 | 298       |
| 403133772                 | 365       |
| 403135803                 | 365       |

## Categorical Variables Codings

|                           |           | Parameter |
|---------------------------|-----------|-----------|
|                           |           | (1)       |
| VASTY2 (SAIR*10000)+VASTY | 403073101 | ,000      |
|                           | 403073102 | 1,000     |
|                           | 403073103 | ,000      |
|                           | 403073202 | ,000      |
|                           | 403073203 | ,000      |
|                           | 403073204 | ,000      |
|                           | 403073303 | ,000      |
|                           | 403073651 | ,000      |
|                           | 403073771 | ,000      |
|                           | 403133102 | ,000      |
|                           | 403133106 | ,000      |
|                           | 403133107 | ,000      |
|                           | 403133109 | ,000      |
|                           | 403133202 | ,000      |
|                           | 403133203 | ,000      |
|                           | 403133204 | ,000      |
|                           | 403133315 | ,000      |
|                           | 403133322 | ,000      |
|                           | 403133401 | ,000      |
|                           | 403133402 | ,000      |
|                           | 403133550 | ,000      |
|                           | 403133772 | ,000      |
|                           | 403135803 | ,000      |

1  
2  
3  
4  
5  
6  
7  
8  
9  
10  
11  
12  
13  
14  
15  
16  
17  
18  
19  
20  
21  
22  
23  
24  
25  
26  
27  
28  
29  
30  
31  
32  
33  
34  
35  
36  
37  
38  
39  
40  
41  
42  
43  
44  
45  
46  
47  
48  
49  
50  
51  
52  
53  
54  
55  
56  
57  
58  
59  
60

**Categorical Variables Codings**

|                           |           | Parameter |
|---------------------------|-----------|-----------|
|                           |           | (2)       |
| VASTY2 (SAIR*10000)+VASTY | 403073101 | ,000      |
|                           | 403073102 | ,000      |
|                           | 403073103 | 1,000     |
|                           | 403073202 | ,000      |
|                           | 403073203 | ,000      |
|                           | 403073204 | ,000      |
|                           | 403073303 | ,000      |
|                           | 403073651 | ,000      |
|                           | 403073771 | ,000      |
|                           | 403133102 | ,000      |
|                           | 403133106 | ,000      |
|                           | 403133107 | ,000      |
|                           | 403133109 | ,000      |
|                           | 403133202 | ,000      |
|                           | 403133203 | ,000      |
|                           | 403133204 | ,000      |
|                           | 403133315 | ,000      |
|                           | 403133322 | ,000      |
|                           | 403133401 | ,000      |
|                           | 403133402 | ,000      |
|                           | 403133550 | ,000      |
|                           | 403133772 | ,000      |
|                           | 403135803 | ,000      |

Peer Review Only

## Categorical Variables Codings

|                           |           | Parameter |
|---------------------------|-----------|-----------|
|                           |           | (3)       |
| VASTY2 (SAIR*10000)+VASTY | 403073101 | ,000      |
|                           | 403073102 | ,000      |
|                           | 403073103 | ,000      |
|                           | 403073202 | 1,000     |
|                           | 403073203 | ,000      |
|                           | 403073204 | ,000      |
|                           | 403073303 | ,000      |
|                           | 403073651 | ,000      |
|                           | 403073771 | ,000      |
|                           | 403133102 | ,000      |
|                           | 403133106 | ,000      |
|                           | 403133107 | ,000      |
|                           | 403133109 | ,000      |
|                           | 403133202 | ,000      |
|                           | 403133203 | ,000      |
|                           | 403133204 | ,000      |
|                           | 403133315 | ,000      |
|                           | 403133322 | ,000      |
|                           | 403133401 | ,000      |
|                           | 403133402 | ,000      |
|                           | 403133550 | ,000      |
|                           | 403133772 | ,000      |
|                           | 403135803 | ,000      |

## Categorical Variables Codings

|                           |           | Parameter |
|---------------------------|-----------|-----------|
|                           |           | (4)       |
| VASTY2 (SAIR*10000)+VASTY | 403073101 | ,000      |
|                           | 403073102 | ,000      |
|                           | 403073103 | ,000      |
|                           | 403073202 | ,000      |
|                           | 403073203 | 1,000     |
|                           | 403073204 | ,000      |
|                           | 403073303 | ,000      |
|                           | 403073651 | ,000      |
|                           | 403073771 | ,000      |
|                           | 403133102 | ,000      |
|                           | 403133106 | ,000      |
|                           | 403133107 | ,000      |
|                           | 403133109 | ,000      |
|                           | 403133202 | ,000      |
|                           | 403133203 | ,000      |
|                           | 403133204 | ,000      |
|                           | 403133315 | ,000      |
|                           | 403133322 | ,000      |
|                           | 403133401 | ,000      |
|                           | 403133402 | ,000      |
|                           | 403133550 | ,000      |
|                           | 403133772 | ,000      |
|                           | 403135803 | ,000      |

## Categorical Variables Codings

|                           |           | Parameter |
|---------------------------|-----------|-----------|
|                           |           | (5)       |
| VASTY2 (SAIR*10000)+VASTY | 403073101 | ,000      |
|                           | 403073102 | ,000      |
|                           | 403073103 | ,000      |
|                           | 403073202 | ,000      |
|                           | 403073203 | ,000      |
|                           | 403073204 | 1,000     |
|                           | 403073303 | ,000      |
|                           | 403073651 | ,000      |
|                           | 403073771 | ,000      |
|                           | 403133102 | ,000      |
|                           | 403133106 | ,000      |
|                           | 403133107 | ,000      |
|                           | 403133109 | ,000      |
|                           | 403133202 | ,000      |
|                           | 403133203 | ,000      |
|                           | 403133204 | ,000      |
|                           | 403133315 | ,000      |
|                           | 403133322 | ,000      |
|                           | 403133401 | ,000      |
|                           | 403133402 | ,000      |
|                           | 403133550 | ,000      |
|                           | 403133772 | ,000      |
|                           | 403135803 | ,000      |

1  
2  
3  
4  
5  
6  
7  
8  
9  
10  
11  
12  
13  
14  
15  
16  
17  
18  
19  
20  
21  
22  
23  
24  
25  
26  
27  
28  
29  
30  
31  
32  
33  
34  
35  
36  
37  
38  
39  
40  
41  
42  
43  
44  
45  
46  
47  
48  
49  
50  
51  
52  
53  
54  
55  
56  
57  
58  
59  
60

**Categorical Variables Codings**

|                           |           | Parameter |
|---------------------------|-----------|-----------|
|                           |           | (6)       |
| VASTY2 (SAIR*10000)+VASTY | 403073101 | ,000      |
|                           | 403073102 | ,000      |
|                           | 403073103 | ,000      |
|                           | 403073202 | ,000      |
|                           | 403073203 | ,000      |
|                           | 403073204 | ,000      |
|                           | 403073303 | 1,000     |
|                           | 403073651 | ,000      |
|                           | 403073771 | ,000      |
|                           | 403133102 | ,000      |
|                           | 403133106 | ,000      |
|                           | 403133107 | ,000      |
|                           | 403133109 | ,000      |
|                           | 403133202 | ,000      |
|                           | 403133203 | ,000      |
|                           | 403133204 | ,000      |
|                           | 403133315 | ,000      |
|                           | 403133322 | ,000      |
|                           | 403133401 | ,000      |
|                           | 403133402 | ,000      |
|                           | 403133550 | ,000      |
|                           | 403133772 | ,000      |
|                           | 403135803 | ,000      |

Peer review only

## Categorical Variables Codings

|                           |           | Parameter |
|---------------------------|-----------|-----------|
|                           |           | (7)       |
| VASTY2 (SAIR*10000)+VASTY | 403073101 | ,000      |
|                           | 403073102 | ,000      |
|                           | 403073103 | ,000      |
|                           | 403073202 | ,000      |
|                           | 403073203 | ,000      |
|                           | 403073204 | ,000      |
|                           | 403073303 | ,000      |
|                           | 403073651 | 1,000     |
|                           | 403073771 | ,000      |
|                           | 403133102 | ,000      |
|                           | 403133106 | ,000      |
|                           | 403133107 | ,000      |
|                           | 403133109 | ,000      |
|                           | 403133202 | ,000      |
|                           | 403133203 | ,000      |
|                           | 403133204 | ,000      |
|                           | 403133315 | ,000      |
|                           | 403133322 | ,000      |
|                           | 403133401 | ,000      |
|                           | 403133402 | ,000      |
|                           | 403133550 | ,000      |
|                           | 403133772 | ,000      |
|                           | 403135803 | ,000      |



1  
2  
3  
4  
5  
6  
7  
8  
9  
10  
11  
12  
13  
14  
15  
16  
17  
18  
19  
20  
21  
22  
23  
24  
25  
26  
27  
28  
29  
30  
31  
32  
33  
34  
35  
36  
37  
38  
39  
40  
41  
42  
43  
44  
45  
46  
47  
48  
49  
50  
51  
52  
53  
54  
55  
56  
57  
58  
59  
60

**Categorical Variables Codings**

|                           |           | Parameter |
|---------------------------|-----------|-----------|
|                           |           | (8)       |
| VASTY2 (SAIR*10000)+VASTY | 403073101 | ,000      |
|                           | 403073102 | ,000      |
|                           | 403073103 | ,000      |
|                           | 403073202 | ,000      |
|                           | 403073203 | ,000      |
|                           | 403073204 | ,000      |
|                           | 403073303 | ,000      |
|                           | 403073651 | ,000      |
|                           | 403073771 | 1,000     |
|                           | 403133102 | ,000      |
|                           | 403133106 | ,000      |
|                           | 403133107 | ,000      |
|                           | 403133109 | ,000      |
|                           | 403133202 | ,000      |
|                           | 403133203 | ,000      |
|                           | 403133204 | ,000      |
|                           | 403133315 | ,000      |
|                           | 403133322 | ,000      |
|                           | 403133401 | ,000      |
|                           | 403133402 | ,000      |
|                           | 403133550 | ,000      |
|                           | 403133772 | ,000      |
|                           | 403135803 | ,000      |

Peer review only

## Categorical Variables Codings

|                           |           | Parameter |
|---------------------------|-----------|-----------|
|                           |           | (9)       |
| VASTY2 (SAIR*10000)+VASTY | 403073101 | ,000      |
|                           | 403073102 | ,000      |
|                           | 403073103 | ,000      |
|                           | 403073202 | ,000      |
|                           | 403073203 | ,000      |
|                           | 403073204 | ,000      |
|                           | 403073303 | ,000      |
|                           | 403073651 | ,000      |
|                           | 403073771 | ,000      |
|                           | 403133102 | 1,000     |
|                           | 403133106 | ,000      |
|                           | 403133107 | ,000      |
|                           | 403133109 | ,000      |
|                           | 403133202 | ,000      |
|                           | 403133203 | ,000      |
|                           | 403133204 | ,000      |
|                           | 403133315 | ,000      |
|                           | 403133322 | ,000      |
|                           | 403133401 | ,000      |
|                           | 403133402 | ,000      |
|                           | 403133550 | ,000      |
|                           | 403133772 | ,000      |
|                           | 403135803 | ,000      |

## Categorical Variables Codings

|                           |           | Parameter |
|---------------------------|-----------|-----------|
|                           |           | (10)      |
| VASTY2 (SAIR*10000)+VASTY | 403073101 | ,000      |
|                           | 403073102 | ,000      |
|                           | 403073103 | ,000      |
|                           | 403073202 | ,000      |
|                           | 403073203 | ,000      |
|                           | 403073204 | ,000      |
|                           | 403073303 | ,000      |
|                           | 403073651 | ,000      |
|                           | 403073771 | ,000      |
|                           | 403133102 | ,000      |
|                           | 403133106 | 1,000     |
|                           | 403133107 | ,000      |
|                           | 403133109 | ,000      |
|                           | 403133202 | ,000      |
|                           | 403133203 | ,000      |
|                           | 403133204 | ,000      |
|                           | 403133315 | ,000      |
|                           | 403133322 | ,000      |
|                           | 403133401 | ,000      |
|                           | 403133402 | ,000      |
|                           | 403133550 | ,000      |
|                           | 403133772 | ,000      |
|                           | 403135803 | ,000      |

## Categorical Variables Codings

|                           |           | Parameter |
|---------------------------|-----------|-----------|
|                           |           | (1)       |
| VASTY2 (SAIR*10000)+VASTY | 403073101 | ,000      |
|                           | 403073102 | ,000      |
|                           | 403073103 | ,000      |
|                           | 403073202 | ,000      |
|                           | 403073203 | ,000      |
|                           | 403073204 | ,000      |
|                           | 403073303 | ,000      |
|                           | 403073651 | ,000      |
|                           | 403073771 | ,000      |
|                           | 403133102 | ,000      |
|                           | 403133106 | ,000      |
|                           | 403133107 | 1,000     |
|                           | 403133109 | ,000      |
|                           | 403133202 | ,000      |
|                           | 403133203 | ,000      |
|                           | 403133204 | ,000      |
|                           | 403133315 | ,000      |
|                           | 403133322 | ,000      |
|                           | 403133401 | ,000      |
|                           | 403133402 | ,000      |
|                           | 403133550 | ,000      |
|                           | 403133772 | ,000      |
|                           | 403135803 | ,000      |

1  
2  
3  
4  
5  
6  
7  
8  
9  
10  
11  
12  
13  
14  
15  
16  
17  
18  
19  
20  
21  
22  
23  
24  
25  
26  
27  
28  
29  
30  
31  
32  
33  
34  
35  
36  
37  
38  
39  
40  
41  
42  
43  
44  
45  
46  
47  
48  
49  
50  
51  
52  
53  
54  
55  
56  
57  
58  
59  
60

**Categorical Variables Codings**

|                           |           | Parameter |
|---------------------------|-----------|-----------|
|                           |           | (12)      |
| VASTY2 (SAIR*10000)+VASTY | 403073101 | ,000      |
|                           | 403073102 | ,000      |
|                           | 403073103 | ,000      |
|                           | 403073202 | ,000      |
|                           | 403073203 | ,000      |
|                           | 403073204 | ,000      |
|                           | 403073303 | ,000      |
|                           | 403073651 | ,000      |
|                           | 403073771 | ,000      |
|                           | 403133102 | ,000      |
|                           | 403133106 | ,000      |
|                           | 403133107 | ,000      |
|                           | 403133109 | 1,000     |
|                           | 403133202 | ,000      |
|                           | 403133203 | ,000      |
|                           | 403133204 | ,000      |
|                           | 403133315 | ,000      |
|                           | 403133322 | ,000      |
|                           | 403133401 | ,000      |
|                           | 403133402 | ,000      |
|                           | 403133550 | ,000      |
|                           | 403133772 | ,000      |
|                           | 403135803 | ,000      |

Peer review only

## Categorical Variables Codings

|                           |           | Parameter |
|---------------------------|-----------|-----------|
|                           |           | (13)      |
| VASTY2 (SAIR*10000)+VASTY | 403073101 | ,000      |
|                           | 403073102 | ,000      |
|                           | 403073103 | ,000      |
|                           | 403073202 | ,000      |
|                           | 403073203 | ,000      |
|                           | 403073204 | ,000      |
|                           | 403073303 | ,000      |
|                           | 403073651 | ,000      |
|                           | 403073771 | ,000      |
|                           | 403133102 | ,000      |
|                           | 403133106 | ,000      |
|                           | 403133107 | ,000      |
|                           | 403133109 | ,000      |
|                           | 403133202 | 1,000     |
|                           | 403133203 | ,000      |
|                           | 403133204 | ,000      |
|                           | 403133315 | ,000      |
|                           | 403133322 | ,000      |
|                           | 403133401 | ,000      |
|                           | 403133402 | ,000      |
|                           | 403133550 | ,000      |
|                           | 403133772 | ,000      |
|                           | 403135803 | ,000      |

## Categorical Variables Codings

|                           |           | Parameter |
|---------------------------|-----------|-----------|
|                           |           | (14)      |
| VASTY2 (SAIR*10000)+VASTY | 403073101 | ,000      |
|                           | 403073102 | ,000      |
|                           | 403073103 | ,000      |
|                           | 403073202 | ,000      |
|                           | 403073203 | ,000      |
|                           | 403073204 | ,000      |
|                           | 403073303 | ,000      |
|                           | 403073651 | ,000      |
|                           | 403073771 | ,000      |
|                           | 403133102 | ,000      |
|                           | 403133106 | ,000      |
|                           | 403133107 | ,000      |
|                           | 403133109 | ,000      |
|                           | 403133202 | ,000      |
|                           | 403133203 | 1,000     |
|                           | 403133204 | ,000      |
|                           | 403133315 | ,000      |
|                           | 403133322 | ,000      |
|                           | 403133401 | ,000      |
|                           | 403133402 | ,000      |
|                           | 403133550 | ,000      |
|                           | 403133772 | ,000      |
|                           | 403135803 | ,000      |

## Categorical Variables Codings

|                           |           | Parameter |
|---------------------------|-----------|-----------|
|                           |           | (15)      |
| VASTY2 (SAIR*10000)+VASTY | 403073101 | ,000      |
|                           | 403073102 | ,000      |
|                           | 403073103 | ,000      |
|                           | 403073202 | ,000      |
|                           | 403073203 | ,000      |
|                           | 403073204 | ,000      |
|                           | 403073303 | ,000      |
|                           | 403073651 | ,000      |
|                           | 403073771 | ,000      |
|                           | 403133102 | ,000      |
|                           | 403133106 | ,000      |
|                           | 403133107 | ,000      |
|                           | 403133109 | ,000      |
|                           | 403133202 | ,000      |
|                           | 403133203 | ,000      |
|                           | 403133204 | 1,000     |
|                           | 403133315 | ,000      |
|                           | 403133322 | ,000      |
|                           | 403133401 | ,000      |
|                           | 403133402 | ,000      |
|                           | 403133550 | ,000      |
|                           | 403133772 | ,000      |
|                           | 403135803 | ,000      |



## Categorical Variables Codings

|                           |           | Parameter |
|---------------------------|-----------|-----------|
|                           |           | (16)      |
| VASTY2 (SAIR*10000)+VASTY | 403073101 | ,000      |
|                           | 403073102 | ,000      |
|                           | 403073103 | ,000      |
|                           | 403073202 | ,000      |
|                           | 403073203 | ,000      |
|                           | 403073204 | ,000      |
|                           | 403073303 | ,000      |
|                           | 403073651 | ,000      |
|                           | 403073771 | ,000      |
|                           | 403133102 | ,000      |
|                           | 403133106 | ,000      |
|                           | 403133107 | ,000      |
|                           | 403133109 | ,000      |
|                           | 403133202 | ,000      |
|                           | 403133203 | ,000      |
|                           | 403133204 | ,000      |
|                           | 403133315 | 1,000     |
|                           | 403133322 | ,000      |
|                           | 403133401 | ,000      |
|                           | 403133402 | ,000      |
|                           | 403133550 | ,000      |
|                           | 403133772 | ,000      |
|                           | 403135803 | ,000      |

## Categorical Variables Codings

|                           |           | Parameter |
|---------------------------|-----------|-----------|
|                           |           | (17)      |
| VASTY2 (SAIR*10000)+VASTY | 403073101 | ,000      |
|                           | 403073102 | ,000      |
|                           | 403073103 | ,000      |
|                           | 403073202 | ,000      |
|                           | 403073203 | ,000      |
|                           | 403073204 | ,000      |
|                           | 403073303 | ,000      |
|                           | 403073651 | ,000      |
|                           | 403073771 | ,000      |
|                           | 403133102 | ,000      |
|                           | 403133106 | ,000      |
|                           | 403133107 | ,000      |
|                           | 403133109 | ,000      |
|                           | 403133202 | ,000      |
|                           | 403133203 | ,000      |
|                           | 403133204 | ,000      |
|                           | 403133315 | ,000      |
|                           | 403133322 | 1,000     |
|                           | 403133401 | ,000      |
|                           | 403133402 | ,000      |
|                           | 403133550 | ,000      |
|                           | 403133772 | ,000      |
|                           | 403135803 | ,000      |

1  
2  
3  
4  
5  
6  
7  
8  
9  
10  
11  
12  
13  
14  
15  
16  
17  
18  
19  
20  
21  
22  
23  
24  
25  
26  
27  
28  
29  
30  
31  
32  
33  
34  
35  
36  
37  
38  
39  
40  
41  
42  
43  
44  
45  
46  
47  
48  
49  
50  
51  
52  
53  
54  
55  
56  
57  
58  
59  
60

**Categorical Variables Codings**

|                           |           | Parameter |
|---------------------------|-----------|-----------|
|                           |           | (18)      |
| VASTY2 (SAIR*10000)+VASTY | 403073101 | ,000      |
|                           | 403073102 | ,000      |
|                           | 403073103 | ,000      |
|                           | 403073202 | ,000      |
|                           | 403073203 | ,000      |
|                           | 403073204 | ,000      |
|                           | 403073303 | ,000      |
|                           | 403073651 | ,000      |
|                           | 403073771 | ,000      |
|                           | 403133102 | ,000      |
|                           | 403133106 | ,000      |
|                           | 403133107 | ,000      |
|                           | 403133109 | ,000      |
|                           | 403133202 | ,000      |
|                           | 403133203 | ,000      |
|                           | 403133204 | ,000      |
|                           | 403133315 | ,000      |
|                           | 403133322 | ,000      |
|                           | 403133401 | 1,000     |
|                           | 403133402 | ,000      |
|                           | 403133550 | ,000      |
|                           | 403133772 | ,000      |
|                           | 403135803 | ,000      |

Peer review only

## Categorical Variables Codings

|                           |           | Parameter |
|---------------------------|-----------|-----------|
|                           |           | (19)      |
| VASTY2 (SAIR*10000)+VASTY | 403073101 | ,000      |
|                           | 403073102 | ,000      |
|                           | 403073103 | ,000      |
|                           | 403073202 | ,000      |
|                           | 403073203 | ,000      |
|                           | 403073204 | ,000      |
|                           | 403073303 | ,000      |
|                           | 403073651 | ,000      |
|                           | 403073771 | ,000      |
|                           | 403133102 | ,000      |
|                           | 403133106 | ,000      |
|                           | 403133107 | ,000      |
|                           | 403133109 | ,000      |
|                           | 403133202 | ,000      |
|                           | 403133203 | ,000      |
|                           | 403133204 | ,000      |
|                           | 403133315 | ,000      |
|                           | 403133322 | ,000      |
|                           | 403133401 | ,000      |
|                           | 403133402 | 1,000     |
|                           | 403133550 | ,000      |
|                           | 403133772 | ,000      |
|                           | 403135803 | ,000      |

1  
2  
3  
4  
5  
6  
7  
8  
9  
10  
11  
12  
13  
14  
15  
16  
17  
18  
19  
20  
21  
22  
23  
24  
25  
26  
27  
28  
29  
30  
31  
32  
33  
34  
35  
36  
37  
38  
39  
40  
41  
42  
43  
44  
45  
46  
47  
48  
49  
50  
51  
52  
53  
54  
55  
56  
57  
58  
59  
60

**Categorical Variables Codings**

|                           |           | Parameter |
|---------------------------|-----------|-----------|
|                           |           | (20)      |
| VASTY2 (SAIR*10000)+VASTY | 403073101 | ,000      |
|                           | 403073102 | ,000      |
|                           | 403073103 | ,000      |
|                           | 403073202 | ,000      |
|                           | 403073203 | ,000      |
|                           | 403073204 | ,000      |
|                           | 403073303 | ,000      |
|                           | 403073651 | ,000      |
|                           | 403073771 | ,000      |
|                           | 403133102 | ,000      |
|                           | 403133106 | ,000      |
|                           | 403133107 | ,000      |
|                           | 403133109 | ,000      |
|                           | 403133202 | ,000      |
|                           | 403133203 | ,000      |
|                           | 403133204 | ,000      |
|                           | 403133315 | ,000      |
|                           | 403133322 | ,000      |
|                           | 403133401 | ,000      |
|                           | 403133402 | ,000      |
|                           | 403133550 | 1,000     |
|                           | 403133772 | ,000      |
|                           | 403135803 | ,000      |

Peer review only

## Categorical Variables Codings

|                           |           | Parameter |
|---------------------------|-----------|-----------|
|                           |           | (21)      |
| VASTY2 (SAIR*10000)+VASTY | 403073101 | ,000      |
|                           | 403073102 | ,000      |
|                           | 403073103 | ,000      |
|                           | 403073202 | ,000      |
|                           | 403073203 | ,000      |
|                           | 403073204 | ,000      |
|                           | 403073303 | ,000      |
|                           | 403073651 | ,000      |
|                           | 403073771 | ,000      |
|                           | 403133102 | ,000      |
|                           | 403133106 | ,000      |
|                           | 403133107 | ,000      |
|                           | 403133109 | ,000      |
|                           | 403133202 | ,000      |
|                           | 403133203 | ,000      |
|                           | 403133204 | ,000      |
|                           | 403133315 | ,000      |
|                           | 403133322 | ,000      |
|                           | 403133401 | ,000      |
|                           | 403133402 | ,000      |
|                           | 403133550 | ,000      |
|                           | 403133772 | 1,000     |
|                           | 403135803 | ,000      |

## Categorical Variables Codings

|                           |           | Parameter |
|---------------------------|-----------|-----------|
|                           |           | (22)      |
| VASTY2 (SAIR*10000)+VASTY | 403073101 | ,000      |
|                           | 403073102 | ,000      |
|                           | 403073103 | ,000      |
|                           | 403073202 | ,000      |
|                           | 403073203 | ,000      |
|                           | 403073204 | ,000      |
|                           | 403073303 | ,000      |
|                           | 403073651 | ,000      |
|                           | 403073771 | ,000      |
|                           | 403133102 | ,000      |
|                           | 403133106 | ,000      |
|                           | 403133107 | ,000      |
|                           | 403133109 | ,000      |
|                           | 403133202 | ,000      |
|                           | 403133203 | ,000      |
|                           | 403133204 | ,000      |
|                           | 403133315 | ,000      |
|                           | 403133322 | ,000      |
|                           | 403133401 | ,000      |
|                           | 403133402 | ,000      |
|                           | 403133550 | ,000      |
|                           | 403133772 | ,000      |
|                           | 403135803 | 1,000     |

## Categorical Variables Codings

|                           |           | Parameter |
|---------------------------|-----------|-----------|
|                           |           | (23)      |
| VASTY2 (SAIR*10000)+VASTY | 403073101 | ,000      |
|                           | 403073102 | ,000      |
|                           | 403073103 | ,000      |
|                           | 403073202 | ,000      |
|                           | 403073203 | ,000      |
|                           | 403073204 | ,000      |
|                           | 403073303 | ,000      |
|                           | 403073651 | ,000      |
|                           | 403073771 | ,000      |
|                           | 403133102 | ,000      |
|                           | 403133106 | ,000      |
|                           | 403133107 | ,000      |
|                           | 403133109 | ,000      |
|                           | 403133202 | ,000      |
|                           | 403133203 | ,000      |
|                           | 403133204 | ,000      |
|                           | 403133315 | ,000      |
|                           | 403133322 | ,000      |
|                           | 403133401 | ,000      |
|                           | 403133402 | ,000      |
|                           | 403133550 | ,000      |
|                           | 403133772 | ,000      |
|                           | 403135803 | ,000      |



1  
2  
3  
4  
5  
6  
7  
8  
9  
10  
11  
12  
13  
14  
15  
16  
17  
18  
19  
20  
21  
22  
23  
24  
25  
26  
27  
28  
29  
30  
31  
32  
33  
34  
35  
36  
37  
38  
39  
40  
41  
42  
43  
44  
45  
46  
47  
48  
49  
50  
51  
52  
53  
54  
55  
56  
57  
58  
59  
60

**Categorical Variables Codings**

|                           |           | Parameter |
|---------------------------|-----------|-----------|
|                           |           | (24)      |
| VASTY2 (SAIR*10000)+VASTY | 403073101 | ,000      |
|                           | 403073102 | ,000      |
|                           | 403073103 | ,000      |
|                           | 403073202 | ,000      |
|                           | 403073203 | ,000      |
|                           | 403073204 | ,000      |
|                           | 403073303 | ,000      |
|                           | 403073651 | ,000      |
|                           | 403073771 | ,000      |
|                           | 403133102 | ,000      |
|                           | 403133106 | ,000      |
|                           | 403133107 | ,000      |
|                           | 403133109 | ,000      |
|                           | 403133202 | ,000      |
|                           | 403133203 | ,000      |
|                           | 403133204 | ,000      |
|                           | 403133315 | ,000      |
|                           | 403133322 | ,000      |
|                           | 403133401 | ,000      |
|                           | 403133402 | ,000      |
|                           | 403133550 | ,000      |
|                           | 403133772 | ,000      |
|                           | 403135803 | ,000      |

Peer review only

## Categorical Variables Codings

|                           |           | Parameter |
|---------------------------|-----------|-----------|
|                           |           | (25)      |
| VASTY2 (SAIR*10000)+VASTY | 403073101 | ,000      |
|                           | 403073102 | ,000      |
|                           | 403073103 | ,000      |
|                           | 403073202 | ,000      |
|                           | 403073203 | ,000      |
|                           | 403073204 | ,000      |
|                           | 403073303 | ,000      |
|                           | 403073651 | ,000      |
|                           | 403073771 | ,000      |
|                           | 403133102 | ,000      |
|                           | 403133106 | ,000      |
|                           | 403133107 | ,000      |
|                           | 403133109 | ,000      |
|                           | 403133202 | ,000      |
|                           | 403133203 | ,000      |
|                           | 403133204 | ,000      |
|                           | 403133315 | ,000      |
|                           | 403133322 | ,000      |
|                           | 403133401 | ,000      |
|                           | 403133402 | ,000      |
|                           | 403133550 | ,000      |
|                           | 403133772 | ,000      |
|                           | 403135803 | ,000      |

## Categorical Variables Codings

|                           |           | Parameter |
|---------------------------|-----------|-----------|
|                           |           | (26)      |
| VASTY2 (SAIR*10000)+VASTY | 403073101 | ,000      |
|                           | 403073102 | ,000      |
|                           | 403073103 | ,000      |
|                           | 403073202 | ,000      |
|                           | 403073203 | ,000      |
|                           | 403073204 | ,000      |
|                           | 403073303 | ,000      |
|                           | 403073651 | ,000      |
|                           | 403073771 | ,000      |
|                           | 403133102 | ,000      |
|                           | 403133106 | ,000      |
|                           | 403133107 | ,000      |
|                           | 403133109 | ,000      |
|                           | 403133202 | ,000      |
|                           | 403133203 | ,000      |
|                           | 403133204 | ,000      |
|                           | 403133315 | ,000      |
|                           | 403133322 | ,000      |
|                           | 403133401 | ,000      |
|                           | 403133402 | ,000      |
|                           | 403133550 | ,000      |
|                           | 403133772 | ,000      |
|                           | 403135803 | ,000      |

## Categorical Variables Codings

|                           |           | Parameter |
|---------------------------|-----------|-----------|
|                           |           | (27)      |
| VASTY2 (SAIR*10000)+VASTY | 403073101 | ,000      |
|                           | 403073102 | ,000      |
|                           | 403073103 | ,000      |
|                           | 403073202 | ,000      |
|                           | 403073203 | ,000      |
|                           | 403073204 | ,000      |
|                           | 403073303 | ,000      |
|                           | 403073651 | ,000      |
|                           | 403073771 | ,000      |
|                           | 403133102 | ,000      |
|                           | 403133106 | ,000      |
|                           | 403133107 | ,000      |
|                           | 403133109 | ,000      |
|                           | 403133202 | ,000      |
|                           | 403133203 | ,000      |
|                           | 403133204 | ,000      |
|                           | 403133315 | ,000      |
|                           | 403133322 | ,000      |
|                           | 403133401 | ,000      |
|                           | 403133402 | ,000      |
|                           | 403133550 | ,000      |
|                           | 403133772 | ,000      |
|                           | 403135803 | ,000      |

1  
2  
3  
4  
5  
6  
7  
8  
9  
10  
11  
12  
13  
14  
15  
16  
17  
18  
19  
20  
21  
22  
23  
24  
25  
26  
27  
28  
29  
30  
31  
32  
33  
34  
35  
36  
37  
38  
39  
40  
41  
42  
43  
44  
45  
46  
47  
48  
49  
50  
51  
52  
53  
54  
55  
56  
57  
58  
59  
60

**Categorical Variables Codings**

|                           |           | Parameter |
|---------------------------|-----------|-----------|
|                           |           | (28)      |
| VASTY2 (SAIR*10000)+VASTY | 403073101 | ,000      |
|                           | 403073102 | ,000      |
|                           | 403073103 | ,000      |
|                           | 403073202 | ,000      |
|                           | 403073203 | ,000      |
|                           | 403073204 | ,000      |
|                           | 403073303 | ,000      |
|                           | 403073651 | ,000      |
|                           | 403073771 | ,000      |
|                           | 403133102 | ,000      |
|                           | 403133106 | ,000      |
|                           | 403133107 | ,000      |
|                           | 403133109 | ,000      |
|                           | 403133202 | ,000      |
|                           | 403133203 | ,000      |
|                           | 403133204 | ,000      |
|                           | 403133315 | ,000      |
|                           | 403133322 | ,000      |
|                           | 403133401 | ,000      |
|                           | 403133402 | ,000      |
|                           | 403133550 | ,000      |
|                           | 403133772 | ,000      |
|                           | 403135803 | ,000      |

Peer review only

## Categorical Variables Codings

|                           |           | Parameter |
|---------------------------|-----------|-----------|
|                           |           | (29)      |
| VASTY2 (SAIR*10000)+VASTY | 403073101 | ,000      |
|                           | 403073102 | ,000      |
|                           | 403073103 | ,000      |
|                           | 403073202 | ,000      |
|                           | 403073203 | ,000      |
|                           | 403073204 | ,000      |
|                           | 403073303 | ,000      |
|                           | 403073651 | ,000      |
|                           | 403073771 | ,000      |
|                           | 403133102 | ,000      |
|                           | 403133106 | ,000      |
|                           | 403133107 | ,000      |
|                           | 403133109 | ,000      |
|                           | 403133202 | ,000      |
|                           | 403133203 | ,000      |
|                           | 403133204 | ,000      |
|                           | 403133315 | ,000      |
|                           | 403133322 | ,000      |
|                           | 403133401 | ,000      |
|                           | 403133402 | ,000      |
|                           | 403133550 | ,000      |
|                           | 403133772 | ,000      |
|                           | 403135803 | ,000      |

## Categorical Variables Codings

|                           |           | Parameter |
|---------------------------|-----------|-----------|
|                           |           | (30)      |
| VASTY2 (SAIR*10000)+VASTY | 403073101 | ,000      |
|                           | 403073102 | ,000      |
|                           | 403073103 | ,000      |
|                           | 403073202 | ,000      |
|                           | 403073203 | ,000      |
|                           | 403073204 | ,000      |
|                           | 403073303 | ,000      |
|                           | 403073651 | ,000      |
|                           | 403073771 | ,000      |
|                           | 403133102 | ,000      |
|                           | 403133106 | ,000      |
|                           | 403133107 | ,000      |
|                           | 403133109 | ,000      |
|                           | 403133202 | ,000      |
|                           | 403133203 | ,000      |
|                           | 403133204 | ,000      |
|                           | 403133315 | ,000      |
|                           | 403133322 | ,000      |
|                           | 403133401 | ,000      |
|                           | 403133402 | ,000      |
|                           | 403133550 | ,000      |
|                           | 403133772 | ,000      |
|                           | 403135803 | ,000      |

## Categorical Variables Codings

|                           |           | Parameter |
|---------------------------|-----------|-----------|
|                           |           | (31)      |
| VASTY2 (SAIR*10000)+VASTY | 403073101 | ,000      |
|                           | 403073102 | ,000      |
|                           | 403073103 | ,000      |
|                           | 403073202 | ,000      |
|                           | 403073203 | ,000      |
|                           | 403073204 | ,000      |
|                           | 403073303 | ,000      |
|                           | 403073651 | ,000      |
|                           | 403073771 | ,000      |
|                           | 403133102 | ,000      |
|                           | 403133106 | ,000      |
|                           | 403133107 | ,000      |
|                           | 403133109 | ,000      |
|                           | 403133202 | ,000      |
|                           | 403133203 | ,000      |
|                           | 403133204 | ,000      |
|                           | 403133315 | ,000      |
|                           | 403133322 | ,000      |
|                           | 403133401 | ,000      |
|                           | 403133402 | ,000      |
|                           | 403133550 | ,000      |
|                           | 403133772 | ,000      |
|                           | 403135803 | ,000      |



## Categorical Variables Codings

|                           |           | Parameter |
|---------------------------|-----------|-----------|
|                           |           | (32)      |
| VASTY2 (SAIR*10000)+VASTY | 403073101 | ,000      |
|                           | 403073102 | ,000      |
|                           | 403073103 | ,000      |
|                           | 403073202 | ,000      |
|                           | 403073203 | ,000      |
|                           | 403073204 | ,000      |
|                           | 403073303 | ,000      |
|                           | 403073651 | ,000      |
|                           | 403073771 | ,000      |
|                           | 403133102 | ,000      |
|                           | 403133106 | ,000      |
|                           | 403133107 | ,000      |
|                           | 403133109 | ,000      |
|                           | 403133202 | ,000      |
|                           | 403133203 | ,000      |
|                           | 403133204 | ,000      |
|                           | 403133315 | ,000      |
|                           | 403133322 | ,000      |
|                           | 403133401 | ,000      |
|                           | 403133402 | ,000      |
|                           | 403133550 | ,000      |
|                           | 403133772 | ,000      |
|                           | 403135803 | ,000      |

## Categorical Variables Codings

|                           |           | Parameter |
|---------------------------|-----------|-----------|
|                           |           | (33)      |
| VASTY2 (SAIR*10000)+VASTY | 403073101 | ,000      |
|                           | 403073102 | ,000      |
|                           | 403073103 | ,000      |
|                           | 403073202 | ,000      |
|                           | 403073203 | ,000      |
|                           | 403073204 | ,000      |
|                           | 403073303 | ,000      |
|                           | 403073651 | ,000      |
|                           | 403073771 | ,000      |
|                           | 403133102 | ,000      |
|                           | 403133106 | ,000      |
|                           | 403133107 | ,000      |
|                           | 403133109 | ,000      |
|                           | 403133202 | ,000      |
|                           | 403133203 | ,000      |
|                           | 403133204 | ,000      |
|                           | 403133315 | ,000      |
|                           | 403133322 | ,000      |
|                           | 403133401 | ,000      |
|                           | 403133402 | ,000      |
|                           | 403133550 | ,000      |
|                           | 403133772 | ,000      |
|                           | 403135803 | ,000      |

1  
2  
3  
4  
5  
6  
7  
8  
9  
10  
11  
12  
13  
14  
15  
16  
17  
18  
19  
20  
21  
22  
23  
24  
25  
26  
27  
28  
29  
30  
31  
32  
33  
34  
35  
36  
37  
38  
39  
40  
41  
42  
43  
44  
45  
46  
47  
48  
49  
50  
51  
52  
53  
54  
55  
56  
57  
58  
59  
60

**Categorical Variables Codings**

|                           |           | Parameter |
|---------------------------|-----------|-----------|
|                           |           | (34)      |
| VASTY2 (SAIR*10000)+VASTY | 403073101 | ,000      |
|                           | 403073102 | ,000      |
|                           | 403073103 | ,000      |
|                           | 403073202 | ,000      |
|                           | 403073203 | ,000      |
|                           | 403073204 | ,000      |
|                           | 403073303 | ,000      |
|                           | 403073651 | ,000      |
|                           | 403073771 | ,000      |
|                           | 403133102 | ,000      |
|                           | 403133106 | ,000      |
|                           | 403133107 | ,000      |
|                           | 403133109 | ,000      |
|                           | 403133202 | ,000      |
|                           | 403133203 | ,000      |
|                           | 403133204 | ,000      |
|                           | 403133315 | ,000      |
|                           | 403133322 | ,000      |
|                           | 403133401 | ,000      |
|                           | 403133402 | ,000      |
|                           | 403133550 | ,000      |
|                           | 403133772 | ,000      |
|                           | 403135803 | ,000      |

Peer review only

## Categorical Variables Codings

|                           |           | Paramete... |
|---------------------------|-----------|-------------|
|                           |           | (35)        |
| VASTY2 (SAIR*10000)+VASTY | 403073101 | ,000        |
|                           | 403073102 | ,000        |
|                           | 403073103 | ,000        |
|                           | 403073202 | ,000        |
|                           | 403073203 | ,000        |
|                           | 403073204 | ,000        |
|                           | 403073303 | ,000        |
|                           | 403073651 | ,000        |
|                           | 403073771 | ,000        |
|                           | 403133102 | ,000        |
|                           | 403133106 | ,000        |
|                           | 403133107 | ,000        |
|                           | 403133109 | ,000        |
|                           | 403133202 | ,000        |
|                           | 403133203 | ,000        |
|                           | 403133204 | ,000        |
|                           | 403133315 | ,000        |
|                           | 403133322 | ,000        |
|                           | 403133401 | ,000        |
|                           | 403133402 | ,000        |
|                           | 403133550 | ,000        |
|                           | 403133772 | ,000        |
|                           | 403135803 | ,000        |

## Categorical Variables Codings

|                                             |                                         | Frequency |
|---------------------------------------------|-----------------------------------------|-----------|
|                                             | 404060001                               | 365       |
|                                             | 404060002                               | 366       |
|                                             | 404310003                               | 291       |
|                                             | 404310004                               | 291       |
|                                             | 502300005                               | 366       |
|                                             | 502300006                               | 225       |
|                                             | 502300007                               | 366       |
|                                             | 502300214                               | 366       |
|                                             | 502300411                               | 366       |
|                                             | 502300415                               | 360       |
|                                             | 502300416                               | 363       |
|                                             | 502300811                               | 364       |
|                                             | 502300913                               | 315       |
| weekday veckodag                            | 1 måndag                                | 1805      |
|                                             | 2 tisdag                                | 1812      |
|                                             | 3 onsdag                                | 1800      |
|                                             | 4 torsdag                               | 1794      |
|                                             | 5 fredag                                | 1788      |
|                                             | 6 lördag                                | 1735      |
|                                             | 7 söndag                                | 1741      |
| season säsong/period                        | 1 januari-mars                          | 3182      |
|                                             | 2 april-maj                             | 2127      |
|                                             | 3 juni-augusti                          | 2911      |
|                                             | 4 september-oktober                     | 2144      |
|                                             | 5 november-december                     | 2111      |
| bv2 belastning vs paoncil halva intervallet | 1 medelbelastning                       | 2788      |
|                                             | 2 underbelastning                       | 4419      |
|                                             | 3 överbelastning                        | 5268      |
| holiday större helg                         | 1 ingen större helg                     | 12078     |
|                                             | 2 större helg (påsk/midsommar/julonyår) | 397       |

## Categorical Variables Codings

|                                             |                                         | Parameter |
|---------------------------------------------|-----------------------------------------|-----------|
|                                             |                                         | (1)       |
|                                             | 404060001                               | ,000      |
|                                             | 404060002                               | ,000      |
|                                             | 404310003                               | ,000      |
|                                             | 404310004                               | ,000      |
|                                             | 502300005                               | ,000      |
|                                             | 502300006                               | ,000      |
|                                             | 502300007                               | ,000      |
|                                             | 502300214                               | ,000      |
|                                             | 502300411                               | ,000      |
|                                             | 502300415                               | ,000      |
|                                             | 502300416                               | ,000      |
|                                             | 502300811                               | ,000      |
|                                             | 502300913                               | ,000      |
| weekday veckodag                            | 1 måndag                                | ,000      |
|                                             | 2 tisdag                                | 1,000     |
|                                             | 3 onsdag                                | ,000      |
|                                             | 4 torsdag                               | ,000      |
|                                             | 5 fredag                                | ,000      |
|                                             | 6 lördag                                | ,000      |
|                                             | 7 söndag                                | ,000      |
| season säsong/period                        | 1 januari-mars                          | ,000      |
|                                             | 2 april-maj                             | 1,000     |
|                                             | 3 juni-augusti                          | ,000      |
|                                             | 4 september-oktober                     | ,000      |
|                                             | 5 november-december                     | ,000      |
| bv2 belastning vs paoncil halva intervallet | 1 medelbelastning                       | ,000      |
|                                             | 2 underbelastning                       | 1,000     |
|                                             | 3 överbelastning                        | ,000      |
| holiday större helg                         | 1 ingen större helg                     | ,000      |
|                                             | 2 större helg (påsk/midsommar/julonyår) | 1,000     |

## Categorical Variables Codings

|                                             |                                         | Parameter |
|---------------------------------------------|-----------------------------------------|-----------|
|                                             |                                         | (2)       |
|                                             | 404060001                               | ,000      |
|                                             | 404060002                               | ,000      |
|                                             | 404310003                               | ,000      |
|                                             | 404310004                               | ,000      |
|                                             | 502300005                               | ,000      |
|                                             | 502300006                               | ,000      |
|                                             | 502300007                               | ,000      |
|                                             | 502300214                               | ,000      |
|                                             | 502300411                               | ,000      |
|                                             | 502300415                               | ,000      |
|                                             | 502300416                               | ,000      |
|                                             | 502300811                               | ,000      |
|                                             | 502300913                               | ,000      |
| weekday veckodag                            | 1 måndag                                | ,000      |
|                                             | 2 tisdag                                | ,000      |
|                                             | 3 onsdag                                | 1,000     |
|                                             | 4 torsdag                               | ,000      |
|                                             | 5 fredag                                | ,000      |
|                                             | 6 lördag                                | ,000      |
|                                             | 7 söndag                                | ,000      |
| season säsong/period                        | 1 januari-mars                          | ,000      |
|                                             | 2 april-maj                             | ,000      |
|                                             | 3 juni-augusti                          | 1,000     |
|                                             | 4 september-oktober                     | ,000      |
|                                             | 5 november-december                     | ,000      |
| bv2 belastning vs paoncil halva intervallet | 1 medelbelastning                       | ,000      |
|                                             | 2 underbelastning                       | ,000      |
|                                             | 3 överbelastning                        | 1,000     |
| holiday större helg                         | 1 ingen större helg                     |           |
|                                             | 2 större helg (påsk/midsommar/julonyår) |           |

## Categorical Variables Codings

|                                             |                                         | Parameter |
|---------------------------------------------|-----------------------------------------|-----------|
|                                             |                                         | (3)       |
|                                             | 404060001                               | ,000      |
|                                             | 404060002                               | ,000      |
|                                             | 404310003                               | ,000      |
|                                             | 404310004                               | ,000      |
|                                             | 502300005                               | ,000      |
|                                             | 502300006                               | ,000      |
|                                             | 502300007                               | ,000      |
|                                             | 502300214                               | ,000      |
|                                             | 502300411                               | ,000      |
|                                             | 502300415                               | ,000      |
|                                             | 502300416                               | ,000      |
|                                             | 502300811                               | ,000      |
|                                             | 502300913                               | ,000      |
| weekday veckodag                            | 1 måndag                                | ,000      |
|                                             | 2 tisdag                                | ,000      |
|                                             | 3 onsdag                                | ,000      |
|                                             | 4 torsdag                               | 1,000     |
|                                             | 5 fredag                                | ,000      |
|                                             | 6 lördag                                | ,000      |
|                                             | 7 söndag                                | ,000      |
| season säsong/period                        | 1 januari-mars                          | ,000      |
|                                             | 2 april-maj                             | ,000      |
|                                             | 3 juni-augusti                          | ,000      |
|                                             | 4 september-oktober                     | 1,000     |
|                                             | 5 november-december                     | ,000      |
| bv2 belastning vs paoncil halva intervallet | 1 medelbelastning                       |           |
|                                             | 2 underbelastning                       |           |
|                                             | 3 överbelastning                        |           |
| holiday större helg                         | 1 ingen större helg                     |           |
|                                             | 2 större helg (påsk/midsommar/julonyår) |           |



## Categorical Variables Codings

|                                             |                                         | Parameter |
|---------------------------------------------|-----------------------------------------|-----------|
|                                             |                                         | (4)       |
|                                             | 404060001                               | ,000      |
|                                             | 404060002                               | ,000      |
|                                             | 404310003                               | ,000      |
|                                             | 404310004                               | ,000      |
|                                             | 502300005                               | ,000      |
|                                             | 502300006                               | ,000      |
|                                             | 502300007                               | ,000      |
|                                             | 502300214                               | ,000      |
|                                             | 502300411                               | ,000      |
|                                             | 502300415                               | ,000      |
|                                             | 502300416                               | ,000      |
|                                             | 502300811                               | ,000      |
|                                             | 502300913                               | ,000      |
| weekday veckodag                            | 1 måndag                                | ,000      |
|                                             | 2 tisdag                                | ,000      |
|                                             | 3 onsdag                                | ,000      |
|                                             | 4 torsdag                               | ,000      |
|                                             | 5 fredag                                | 1,000     |
|                                             | 6 lördag                                | ,000      |
|                                             | 7 söndag                                | ,000      |
| season säsong/period                        | 1 januari-mars                          | ,000      |
|                                             | 2 april-maj                             | ,000      |
|                                             | 3 juni-augusti                          | ,000      |
|                                             | 4 september-oktober                     | ,000      |
|                                             | 5 november-december                     | 1,000     |
| bv2 belastning vs paoncil halva intervallet | 1 medelbelastning                       |           |
|                                             | 2 underbelastning                       |           |
|                                             | 3 överbelastning                        |           |
| holiday större helg                         | 1 ingen större helg                     |           |
|                                             | 2 större helg (påsk/midsommar/julonyår) |           |

## Categorical Variables Codings

|                                             |                                         | Parameter |
|---------------------------------------------|-----------------------------------------|-----------|
|                                             |                                         | (5)       |
|                                             | 404060001                               | ,000      |
|                                             | 404060002                               | ,000      |
|                                             | 404310003                               | ,000      |
|                                             | 404310004                               | ,000      |
|                                             | 502300005                               | ,000      |
|                                             | 502300006                               | ,000      |
|                                             | 502300007                               | ,000      |
|                                             | 502300214                               | ,000      |
|                                             | 502300411                               | ,000      |
|                                             | 502300415                               | ,000      |
|                                             | 502300416                               | ,000      |
|                                             | 502300811                               | ,000      |
|                                             | 502300913                               | ,000      |
| weekday veckodag                            | 1 måndag                                | ,000      |
|                                             | 2 tisdag                                | ,000      |
|                                             | 3 onsdag                                | ,000      |
|                                             | 4 torsdag                               | ,000      |
|                                             | 5 fredag                                | ,000      |
|                                             | 6 lördag                                | 1,000     |
|                                             | 7 söndag                                | ,000      |
| season säsong/period                        | 1 januari-mars                          |           |
|                                             | 2 april-maj                             |           |
|                                             | 3 juni-augusti                          |           |
|                                             | 4 september-oktober                     |           |
|                                             | 5 november-december                     |           |
| bv2 belastning vs paoncil halva intervallet | 1 medelbelastning                       |           |
|                                             | 2 underbelastning                       |           |
|                                             | 3 överbelastning                        |           |
| holiday större helg                         | 1 ingen större helg                     |           |
|                                             | 2 större helg (påsk/midsommar/julonyår) |           |

## Categorical Variables Codings

|                                             |                                         | Parameter |
|---------------------------------------------|-----------------------------------------|-----------|
|                                             |                                         | (6)       |
|                                             | 404060001                               | ,000      |
|                                             | 404060002                               | ,000      |
|                                             | 404310003                               | ,000      |
|                                             | 404310004                               | ,000      |
|                                             | 502300005                               | ,000      |
|                                             | 502300006                               | ,000      |
|                                             | 502300007                               | ,000      |
|                                             | 502300214                               | ,000      |
|                                             | 502300411                               | ,000      |
|                                             | 502300415                               | ,000      |
|                                             | 502300416                               | ,000      |
|                                             | 502300811                               | ,000      |
|                                             | 502300913                               | ,000      |
| weekday veckodag                            | 1 måndag                                | ,000      |
|                                             | 2 tisdag                                | ,000      |
|                                             | 3 onsdag                                | ,000      |
|                                             | 4 torsdag                               | ,000      |
|                                             | 5 fredag                                | ,000      |
|                                             | 6 lördag                                | ,000      |
|                                             | 7 söndag                                | 1,000     |
| season säsong/period                        | 1 januari-mars                          |           |
|                                             | 2 april-maj                             |           |
|                                             | 3 juni-augusti                          |           |
|                                             | 4 september-oktober                     |           |
|                                             | 5 november-december                     |           |
| bv2 belastning vs paoncil halva intervallet | 1 medelbelastning                       |           |
|                                             | 2 underbelastning                       |           |
|                                             | 3 överbelastning                        |           |
| holiday större helg                         | 1 ingen större helg                     |           |
|                                             | 2 större helg (påsk/midsommar/julonyår) |           |

## Categorical Variables Codings

|                                             |                                         | Parameter |
|---------------------------------------------|-----------------------------------------|-----------|
|                                             |                                         | (7)       |
|                                             | 404060001                               | ,000      |
|                                             | 404060002                               | ,000      |
|                                             | 404310003                               | ,000      |
|                                             | 404310004                               | ,000      |
|                                             | 502300005                               | ,000      |
|                                             | 502300006                               | ,000      |
|                                             | 502300007                               | ,000      |
|                                             | 502300214                               | ,000      |
|                                             | 502300411                               | ,000      |
|                                             | 502300415                               | ,000      |
|                                             | 502300416                               | ,000      |
|                                             | 502300811                               | ,000      |
|                                             | 502300913                               | ,000      |
| weekday veckodag                            | 1 måndag                                |           |
|                                             | 2 tisdag                                |           |
|                                             | 3 onsdag                                |           |
|                                             | 4 torsdag                               |           |
|                                             | 5 fredag                                |           |
|                                             | 6 lördag                                |           |
|                                             | 7 söndag                                |           |
| season säsong/period                        | 1 januari-mars                          |           |
|                                             | 2 april-maj                             |           |
|                                             | 3 juni-augusti                          |           |
|                                             | 4 september-oktober                     |           |
|                                             | 5 november-december                     |           |
| bv2 belastning vs paoncil halva intervallet | 1 medelbelastning                       |           |
|                                             | 2 underbelastning                       |           |
|                                             | 3 överbelastning                        |           |
| holiday större helg                         | 1 ingen större helg                     |           |
|                                             | 2 större helg (påsk/midsommar/julonyår) |           |

## Categorical Variables Codings

|                                             |                                         | Parameter |
|---------------------------------------------|-----------------------------------------|-----------|
|                                             |                                         | (8)       |
|                                             | 404060001                               | ,000      |
|                                             | 404060002                               | ,000      |
|                                             | 404310003                               | ,000      |
|                                             | 404310004                               | ,000      |
|                                             | 502300005                               | ,000      |
|                                             | 502300006                               | ,000      |
|                                             | 502300007                               | ,000      |
|                                             | 502300214                               | ,000      |
|                                             | 502300411                               | ,000      |
|                                             | 502300415                               | ,000      |
|                                             | 502300416                               | ,000      |
|                                             | 502300811                               | ,000      |
|                                             | 502300913                               | ,000      |
| weekday veckodag                            | 1 måndag                                |           |
|                                             | 2 tisdag                                |           |
|                                             | 3 onsdag                                |           |
|                                             | 4 torsdag                               |           |
|                                             | 5 fredag                                |           |
|                                             | 6 lördag                                |           |
|                                             | 7 söndag                                |           |
| season säsong/period                        | 1 januari-mars                          |           |
|                                             | 2 april-maj                             |           |
|                                             | 3 juni-augusti                          |           |
|                                             | 4 september-oktober                     |           |
|                                             | 5 november-december                     |           |
| bv2 belastning vs paoncil halva intervallet | 1 medelbelastning                       |           |
|                                             | 2 underbelastning                       |           |
|                                             | 3 överbelastning                        |           |
| holiday större helg                         | 1 ingen större helg                     |           |
|                                             | 2 större helg (påsk/midsommar/julonyår) |           |

## Categorical Variables Codings

|                                             |                                         | Parameter |
|---------------------------------------------|-----------------------------------------|-----------|
|                                             |                                         | (9)       |
|                                             | 404060001                               | ,000      |
|                                             | 404060002                               | ,000      |
|                                             | 404310003                               | ,000      |
|                                             | 404310004                               | ,000      |
|                                             | 502300005                               | ,000      |
|                                             | 502300006                               | ,000      |
|                                             | 502300007                               | ,000      |
|                                             | 502300214                               | ,000      |
|                                             | 502300411                               | ,000      |
|                                             | 502300415                               | ,000      |
|                                             | 502300416                               | ,000      |
|                                             | 502300811                               | ,000      |
|                                             | 502300913                               | ,000      |
| weekday veckodag                            | 1 måndag                                |           |
|                                             | 2 tisdag                                |           |
|                                             | 3 onsdag                                |           |
|                                             | 4 torsdag                               |           |
|                                             | 5 fredag                                |           |
|                                             | 6 lördag                                |           |
|                                             | 7 söndag                                |           |
| season säsong/period                        | 1 januari-mars                          |           |
|                                             | 2 april-maj                             |           |
|                                             | 3 juni-augusti                          |           |
|                                             | 4 september-oktober                     |           |
|                                             | 5 november-december                     |           |
| bv2 belastning vs paoncil halva intervallet | 1 medelbelastning                       |           |
|                                             | 2 underbelastning                       |           |
|                                             | 3 överbelastning                        |           |
| holiday större helg                         | 1 ingen större helg                     |           |
|                                             | 2 större helg (påsk/midsommar/julonyår) |           |

## Categorical Variables Codings

|                                             |                                         | Parameter |
|---------------------------------------------|-----------------------------------------|-----------|
|                                             |                                         | (10)      |
|                                             | 404060001                               | ,000      |
|                                             | 404060002                               | ,000      |
|                                             | 404310003                               | ,000      |
|                                             | 404310004                               | ,000      |
|                                             | 502300005                               | ,000      |
|                                             | 502300006                               | ,000      |
|                                             | 502300007                               | ,000      |
|                                             | 502300214                               | ,000      |
|                                             | 502300411                               | ,000      |
|                                             | 502300415                               | ,000      |
|                                             | 502300416                               | ,000      |
|                                             | 502300811                               | ,000      |
|                                             | 502300913                               | ,000      |
| weekday veckodag                            | 1 måndag                                |           |
|                                             | 2 tisdag                                |           |
|                                             | 3 onsdag                                |           |
|                                             | 4 torsdag                               |           |
|                                             | 5 fredag                                |           |
|                                             | 6 lördag                                |           |
|                                             | 7 söndag                                |           |
| season säsong/period                        | 1 januari-mars                          |           |
|                                             | 2 april-maj                             |           |
|                                             | 3 juni-augusti                          |           |
|                                             | 4 september-oktober                     |           |
|                                             | 5 november-december                     |           |
| bv2 belastning vs paoncil halva intervallet | 1 medelbelastning                       |           |
|                                             | 2 underbelastning                       |           |
|                                             | 3 överbelastning                        |           |
| holiday större helg                         | 1 ingen större helg                     |           |
|                                             | 2 större helg (påsk/midsommar/julonyår) |           |

## Categorical Variables Codings

|                                             |                                         | Parameter |
|---------------------------------------------|-----------------------------------------|-----------|
|                                             |                                         | (1)       |
|                                             | 404060001                               | ,000      |
|                                             | 404060002                               | ,000      |
|                                             | 404310003                               | ,000      |
|                                             | 404310004                               | ,000      |
|                                             | 502300005                               | ,000      |
|                                             | 502300006                               | ,000      |
|                                             | 502300007                               | ,000      |
|                                             | 502300214                               | ,000      |
|                                             | 502300411                               | ,000      |
|                                             | 502300415                               | ,000      |
|                                             | 502300416                               | ,000      |
|                                             | 502300811                               | ,000      |
|                                             | 502300913                               | ,000      |
| weekday veckodag                            | 1 måndag                                |           |
|                                             | 2 tisdag                                |           |
|                                             | 3 onsdag                                |           |
|                                             | 4 torsdag                               |           |
|                                             | 5 fredag                                |           |
|                                             | 6 lördag                                |           |
|                                             | 7 söndag                                |           |
| season säsong/period                        | 1 januari-mars                          |           |
|                                             | 2 april-maj                             |           |
|                                             | 3 juni-augusti                          |           |
|                                             | 4 september-oktober                     |           |
|                                             | 5 november-december                     |           |
| bv2 belastning vs paoncil halva intervallet | 1 medelbelastning                       |           |
|                                             | 2 underbelastning                       |           |
|                                             | 3 överbelastning                        |           |
| holiday större helg                         | 1 ingen större helg                     |           |
|                                             | 2 större helg (påsk/midsommar/julonyår) |           |



## Categorical Variables Codings

|                                             |                                         | Parameter |
|---------------------------------------------|-----------------------------------------|-----------|
|                                             |                                         | (12)      |
|                                             | 404060001                               | ,000      |
|                                             | 404060002                               | ,000      |
|                                             | 404310003                               | ,000      |
|                                             | 404310004                               | ,000      |
|                                             | 502300005                               | ,000      |
|                                             | 502300006                               | ,000      |
|                                             | 502300007                               | ,000      |
|                                             | 502300214                               | ,000      |
|                                             | 502300411                               | ,000      |
|                                             | 502300415                               | ,000      |
|                                             | 502300416                               | ,000      |
|                                             | 502300811                               | ,000      |
|                                             | 502300913                               | ,000      |
| weekday veckodag                            | 1 måndag                                |           |
|                                             | 2 tisdag                                |           |
|                                             | 3 onsdag                                |           |
|                                             | 4 torsdag                               |           |
|                                             | 5 fredag                                |           |
|                                             | 6 lördag                                |           |
|                                             | 7 söndag                                |           |
| season säsong/period                        | 1 januari-mars                          |           |
|                                             | 2 april-maj                             |           |
|                                             | 3 juni-augusti                          |           |
|                                             | 4 september-oktober                     |           |
|                                             | 5 november-december                     |           |
| bv2 belastning vs paoncil halva intervallet | 1 medelbelastning                       |           |
|                                             | 2 underbelastning                       |           |
|                                             | 3 överbelastning                        |           |
| holiday större helg                         | 1 ingen större helg                     |           |
|                                             | 2 större helg (påsk/midsommar/julonyår) |           |

## Categorical Variables Codings

|                                             |                                         | Parameter |
|---------------------------------------------|-----------------------------------------|-----------|
|                                             |                                         | (13)      |
|                                             | 404060001                               | ,000      |
|                                             | 404060002                               | ,000      |
|                                             | 404310003                               | ,000      |
|                                             | 404310004                               | ,000      |
|                                             | 502300005                               | ,000      |
|                                             | 502300006                               | ,000      |
|                                             | 502300007                               | ,000      |
|                                             | 502300214                               | ,000      |
|                                             | 502300411                               | ,000      |
|                                             | 502300415                               | ,000      |
|                                             | 502300416                               | ,000      |
|                                             | 502300811                               | ,000      |
|                                             | 502300913                               | ,000      |
| weekday veckodag                            | 1 måndag                                |           |
|                                             | 2 tisdag                                |           |
|                                             | 3 onsdag                                |           |
|                                             | 4 torsdag                               |           |
|                                             | 5 fredag                                |           |
|                                             | 6 lördag                                |           |
|                                             | 7 söndag                                |           |
| season säsong/period                        | 1 januari-mars                          |           |
|                                             | 2 april-maj                             |           |
|                                             | 3 juni-augusti                          |           |
|                                             | 4 september-oktober                     |           |
|                                             | 5 november-december                     |           |
| bv2 belastning vs paoncil halva intervallet | 1 medelbelastning                       |           |
|                                             | 2 underbelastning                       |           |
|                                             | 3 överbelastning                        |           |
| holiday större helg                         | 1 ingen större helg                     |           |
|                                             | 2 större helg (påsk/midsommar/julonyår) |           |

## Categorical Variables Codings

|                                             |                                         | Parameter |
|---------------------------------------------|-----------------------------------------|-----------|
|                                             |                                         | (14)      |
|                                             | 404060001                               | ,000      |
|                                             | 404060002                               | ,000      |
|                                             | 404310003                               | ,000      |
|                                             | 404310004                               | ,000      |
|                                             | 502300005                               | ,000      |
|                                             | 502300006                               | ,000      |
|                                             | 502300007                               | ,000      |
|                                             | 502300214                               | ,000      |
|                                             | 502300411                               | ,000      |
|                                             | 502300415                               | ,000      |
|                                             | 502300416                               | ,000      |
|                                             | 502300811                               | ,000      |
|                                             | 502300913                               | ,000      |
| weekday veckodag                            | 1 måndag                                |           |
|                                             | 2 tisdag                                |           |
|                                             | 3 onsdag                                |           |
|                                             | 4 torsdag                               |           |
|                                             | 5 fredag                                |           |
|                                             | 6 lördag                                |           |
|                                             | 7 söndag                                |           |
| season säsong/period                        | 1 januari-mars                          |           |
|                                             | 2 april-maj                             |           |
|                                             | 3 juni-augusti                          |           |
|                                             | 4 september-oktober                     |           |
|                                             | 5 november-december                     |           |
| bv2 belastning vs paoncil halva intervallet | 1 medelbelastning                       |           |
|                                             | 2 underbelastning                       |           |
|                                             | 3 överbelastning                        |           |
| holiday större helg                         | 1 ingen större helg                     |           |
|                                             | 2 större helg (påsk/midsommar/julonyår) |           |

## Categorical Variables Codings

|                                             |                                         | Parameter |
|---------------------------------------------|-----------------------------------------|-----------|
|                                             |                                         | (15)      |
|                                             | 404060001                               | ,000      |
|                                             | 404060002                               | ,000      |
|                                             | 404310003                               | ,000      |
|                                             | 404310004                               | ,000      |
|                                             | 502300005                               | ,000      |
|                                             | 502300006                               | ,000      |
|                                             | 502300007                               | ,000      |
|                                             | 502300214                               | ,000      |
|                                             | 502300411                               | ,000      |
|                                             | 502300415                               | ,000      |
|                                             | 502300416                               | ,000      |
|                                             | 502300811                               | ,000      |
|                                             | 502300913                               | ,000      |
| weekday veckodag                            | 1 måndag                                |           |
|                                             | 2 tisdag                                |           |
|                                             | 3 onsdag                                |           |
|                                             | 4 torsdag                               |           |
|                                             | 5 fredag                                |           |
|                                             | 6 lördag                                |           |
|                                             | 7 söndag                                |           |
| season säsong/period                        | 1 januari-mars                          |           |
|                                             | 2 april-maj                             |           |
|                                             | 3 juni-augusti                          |           |
|                                             | 4 september-oktober                     |           |
|                                             | 5 november-december                     |           |
| bv2 belastning vs paoncil halva intervallet | 1 medelbelastning                       |           |
|                                             | 2 underbelastning                       |           |
|                                             | 3 överbelastning                        |           |
| holiday större helg                         | 1 ingen större helg                     |           |
|                                             | 2 större helg (påsk/midsommar/julonyår) |           |

## Categorical Variables Codings

|                                             |                                         | Parameter |
|---------------------------------------------|-----------------------------------------|-----------|
|                                             |                                         | (16)      |
|                                             | 404060001                               | ,000      |
|                                             | 404060002                               | ,000      |
|                                             | 404310003                               | ,000      |
|                                             | 404310004                               | ,000      |
|                                             | 502300005                               | ,000      |
|                                             | 502300006                               | ,000      |
|                                             | 502300007                               | ,000      |
|                                             | 502300214                               | ,000      |
|                                             | 502300411                               | ,000      |
|                                             | 502300415                               | ,000      |
|                                             | 502300416                               | ,000      |
|                                             | 502300811                               | ,000      |
|                                             | 502300913                               | ,000      |
| weekday veckodag                            | 1 måndag                                |           |
|                                             | 2 tisdag                                |           |
|                                             | 3 onsdag                                |           |
|                                             | 4 torsdag                               |           |
|                                             | 5 fredag                                |           |
|                                             | 6 lördag                                |           |
|                                             | 7 söndag                                |           |
| season säsong/period                        | 1 januari-mars                          |           |
|                                             | 2 april-maj                             |           |
|                                             | 3 juni-augusti                          |           |
|                                             | 4 september-oktober                     |           |
|                                             | 5 november-december                     |           |
| bv2 belastning vs paoncil halva intervallet | 1 medelbelastning                       |           |
|                                             | 2 underbelastning                       |           |
|                                             | 3 överbelastning                        |           |
| holiday större helg                         | 1 ingen större helg                     |           |
|                                             | 2 större helg (påsk/midsommar/julonyår) |           |

## Categorical Variables Codings

|                                             |                                         | Parameter |
|---------------------------------------------|-----------------------------------------|-----------|
|                                             |                                         | (17)      |
|                                             | 404060001                               | ,000      |
|                                             | 404060002                               | ,000      |
|                                             | 404310003                               | ,000      |
|                                             | 404310004                               | ,000      |
|                                             | 502300005                               | ,000      |
|                                             | 502300006                               | ,000      |
|                                             | 502300007                               | ,000      |
|                                             | 502300214                               | ,000      |
|                                             | 502300411                               | ,000      |
|                                             | 502300415                               | ,000      |
|                                             | 502300416                               | ,000      |
|                                             | 502300811                               | ,000      |
|                                             | 502300913                               | ,000      |
| weekday veckodag                            | 1 måndag                                |           |
|                                             | 2 tisdag                                |           |
|                                             | 3 onsdag                                |           |
|                                             | 4 torsdag                               |           |
|                                             | 5 fredag                                |           |
|                                             | 6 lördag                                |           |
|                                             | 7 söndag                                |           |
| season säsong/period                        | 1 januari-mars                          |           |
|                                             | 2 april-maj                             |           |
|                                             | 3 juni-augusti                          |           |
|                                             | 4 september-oktober                     |           |
|                                             | 5 november-december                     |           |
| bv2 belastning vs paoncil halva intervallet | 1 medelbelastning                       |           |
|                                             | 2 underbelastning                       |           |
|                                             | 3 överbelastning                        |           |
| holiday större helg                         | 1 ingen större helg                     |           |
|                                             | 2 större helg (påsk/midsommar/julonyår) |           |

## Categorical Variables Codings

|                                             |                                         | Parameter |
|---------------------------------------------|-----------------------------------------|-----------|
|                                             |                                         | (18)      |
|                                             | 404060001                               | ,000      |
|                                             | 404060002                               | ,000      |
|                                             | 404310003                               | ,000      |
|                                             | 404310004                               | ,000      |
|                                             | 502300005                               | ,000      |
|                                             | 502300006                               | ,000      |
|                                             | 502300007                               | ,000      |
|                                             | 502300214                               | ,000      |
|                                             | 502300411                               | ,000      |
|                                             | 502300415                               | ,000      |
|                                             | 502300416                               | ,000      |
|                                             | 502300811                               | ,000      |
|                                             | 502300913                               | ,000      |
| weekday veckodag                            | 1 måndag                                |           |
|                                             | 2 tisdag                                |           |
|                                             | 3 onsdag                                |           |
|                                             | 4 torsdag                               |           |
|                                             | 5 fredag                                |           |
|                                             | 6 lördag                                |           |
|                                             | 7 söndag                                |           |
| season säsong/period                        | 1 januari-mars                          |           |
|                                             | 2 april-maj                             |           |
|                                             | 3 juni-augusti                          |           |
|                                             | 4 september-oktober                     |           |
|                                             | 5 november-december                     |           |
| bv2 belastning vs paoncil halva intervallet | 1 medelbelastning                       |           |
|                                             | 2 underbelastning                       |           |
|                                             | 3 överbelastning                        |           |
| holiday större helg                         | 1 ingen större helg                     |           |
|                                             | 2 större helg (påsk/midsommar/julonyår) |           |

## Categorical Variables Codings

|                                             |                                         | Parameter |
|---------------------------------------------|-----------------------------------------|-----------|
|                                             |                                         | (19)      |
|                                             | 404060001                               | ,000      |
|                                             | 404060002                               | ,000      |
|                                             | 404310003                               | ,000      |
|                                             | 404310004                               | ,000      |
|                                             | 502300005                               | ,000      |
|                                             | 502300006                               | ,000      |
|                                             | 502300007                               | ,000      |
|                                             | 502300214                               | ,000      |
|                                             | 502300411                               | ,000      |
|                                             | 502300415                               | ,000      |
|                                             | 502300416                               | ,000      |
|                                             | 502300811                               | ,000      |
|                                             | 502300913                               | ,000      |
| weekday veckodag                            | 1 måndag                                |           |
|                                             | 2 tisdag                                |           |
|                                             | 3 onsdag                                |           |
|                                             | 4 torsdag                               |           |
|                                             | 5 fredag                                |           |
|                                             | 6 lördag                                |           |
|                                             | 7 söndag                                |           |
| season säsong/period                        | 1 januari-mars                          |           |
|                                             | 2 april-maj                             |           |
|                                             | 3 juni-augusti                          |           |
|                                             | 4 september-oktober                     |           |
|                                             | 5 november-december                     |           |
| bv2 belastning vs paoncil halva intervallet | 1 medelbelastning                       |           |
|                                             | 2 underbelastning                       |           |
|                                             | 3 överbelastning                        |           |
| holiday större helg                         | 1 ingen större helg                     |           |
|                                             | 2 större helg (påsk/midsommar/julonyår) |           |



## Categorical Variables Codings

|                                             |                                         | Parameter |
|---------------------------------------------|-----------------------------------------|-----------|
|                                             |                                         | (20)      |
|                                             | 404060001                               | ,000      |
|                                             | 404060002                               | ,000      |
|                                             | 404310003                               | ,000      |
|                                             | 404310004                               | ,000      |
|                                             | 502300005                               | ,000      |
|                                             | 502300006                               | ,000      |
|                                             | 502300007                               | ,000      |
|                                             | 502300214                               | ,000      |
|                                             | 502300411                               | ,000      |
|                                             | 502300415                               | ,000      |
|                                             | 502300416                               | ,000      |
|                                             | 502300811                               | ,000      |
|                                             | 502300913                               | ,000      |
| weekday veckodag                            | 1 måndag                                |           |
|                                             | 2 tisdag                                |           |
|                                             | 3 onsdag                                |           |
|                                             | 4 torsdag                               |           |
|                                             | 5 fredag                                |           |
|                                             | 6 lördag                                |           |
|                                             | 7 söndag                                |           |
| season säsong/period                        | 1 januari-mars                          |           |
|                                             | 2 april-maj                             |           |
|                                             | 3 juni-augusti                          |           |
|                                             | 4 september-oktober                     |           |
|                                             | 5 november-december                     |           |
| bv2 belastning vs paoncil halva intervallet | 1 medelbelastning                       |           |
|                                             | 2 underbelastning                       |           |
|                                             | 3 överbelastning                        |           |
| holiday större helg                         | 1 ingen större helg                     |           |
|                                             | 2 större helg (påsk/midsommar/julonyår) |           |

## Categorical Variables Codings

|                                             |                                         | Parameter |
|---------------------------------------------|-----------------------------------------|-----------|
|                                             |                                         | (21)      |
|                                             | 404060001                               | ,000      |
|                                             | 404060002                               | ,000      |
|                                             | 404310003                               | ,000      |
|                                             | 404310004                               | ,000      |
|                                             | 502300005                               | ,000      |
|                                             | 502300006                               | ,000      |
|                                             | 502300007                               | ,000      |
|                                             | 502300214                               | ,000      |
|                                             | 502300411                               | ,000      |
|                                             | 502300415                               | ,000      |
|                                             | 502300416                               | ,000      |
|                                             | 502300811                               | ,000      |
|                                             | 502300913                               | ,000      |
| weekday veckodag                            | 1 måndag                                |           |
|                                             | 2 tisdag                                |           |
|                                             | 3 onsdag                                |           |
|                                             | 4 torsdag                               |           |
|                                             | 5 fredag                                |           |
|                                             | 6 lördag                                |           |
|                                             | 7 söndag                                |           |
| season säsong/period                        | 1 januari-mars                          |           |
|                                             | 2 april-maj                             |           |
|                                             | 3 juni-augusti                          |           |
|                                             | 4 september-oktober                     |           |
|                                             | 5 november-december                     |           |
| bv2 belastning vs paoncil halva intervallet | 1 medelbelastning                       |           |
|                                             | 2 underbelastning                       |           |
|                                             | 3 överbelastning                        |           |
| holiday större helg                         | 1 ingen större helg                     |           |
|                                             | 2 större helg (påsk/midsommar/julonyår) |           |

## Categorical Variables Codings

|                                             |                                         | Parameter |
|---------------------------------------------|-----------------------------------------|-----------|
|                                             |                                         | (22)      |
|                                             | 404060001                               | ,000      |
|                                             | 404060002                               | ,000      |
|                                             | 404310003                               | ,000      |
|                                             | 404310004                               | ,000      |
|                                             | 502300005                               | ,000      |
|                                             | 502300006                               | ,000      |
|                                             | 502300007                               | ,000      |
|                                             | 502300214                               | ,000      |
|                                             | 502300411                               | ,000      |
|                                             | 502300415                               | ,000      |
|                                             | 502300416                               | ,000      |
|                                             | 502300811                               | ,000      |
|                                             | 502300913                               | ,000      |
| weekday veckodag                            | 1 måndag                                |           |
|                                             | 2 tisdag                                |           |
|                                             | 3 onsdag                                |           |
|                                             | 4 torsdag                               |           |
|                                             | 5 fredag                                |           |
|                                             | 6 lördag                                |           |
|                                             | 7 söndag                                |           |
| season säsong/period                        | 1 januari-mars                          |           |
|                                             | 2 april-maj                             |           |
|                                             | 3 juni-augusti                          |           |
|                                             | 4 september-oktober                     |           |
|                                             | 5 november-december                     |           |
| bv2 belastning vs paoncil halva intervallet | 1 medelbelastning                       |           |
|                                             | 2 underbelastning                       |           |
|                                             | 3 överbelastning                        |           |
| holiday större helg                         | 1 ingen större helg                     |           |
|                                             | 2 större helg (påsk/midsommar/julonyår) |           |

## Categorical Variables Codings

|                                             |                                         | Parameter |
|---------------------------------------------|-----------------------------------------|-----------|
|                                             |                                         | (23)      |
|                                             | 404060001                               | 1,000     |
|                                             | 404060002                               | ,000      |
|                                             | 404310003                               | ,000      |
|                                             | 404310004                               | ,000      |
|                                             | 502300005                               | ,000      |
|                                             | 502300006                               | ,000      |
|                                             | 502300007                               | ,000      |
|                                             | 502300214                               | ,000      |
|                                             | 502300411                               | ,000      |
|                                             | 502300415                               | ,000      |
|                                             | 502300416                               | ,000      |
|                                             | 502300811                               | ,000      |
|                                             | 502300913                               | ,000      |
| weekday veckodag                            | 1 måndag                                |           |
|                                             | 2 tisdag                                |           |
|                                             | 3 onsdag                                |           |
|                                             | 4 torsdag                               |           |
|                                             | 5 fredag                                |           |
|                                             | 6 lördag                                |           |
|                                             | 7 söndag                                |           |
| season säsong/period                        | 1 januari-mars                          |           |
|                                             | 2 april-maj                             |           |
|                                             | 3 juni-augusti                          |           |
|                                             | 4 september-oktober                     |           |
|                                             | 5 november-december                     |           |
| bv2 belastning vs paoncil halva intervallet | 1 medelbelastning                       |           |
|                                             | 2 underbelastning                       |           |
|                                             | 3 överbelastning                        |           |
| holiday större helg                         | 1 ingen större helg                     |           |
|                                             | 2 större helg (påsk/midsommar/julonyår) |           |

## Categorical Variables Codings

|                                             |                                         | Parameter |
|---------------------------------------------|-----------------------------------------|-----------|
|                                             |                                         | (24)      |
|                                             | 404060001                               | ,000      |
|                                             | 404060002                               | 1,000     |
|                                             | 404310003                               | ,000      |
|                                             | 404310004                               | ,000      |
|                                             | 502300005                               | ,000      |
|                                             | 502300006                               | ,000      |
|                                             | 502300007                               | ,000      |
|                                             | 502300214                               | ,000      |
|                                             | 502300411                               | ,000      |
|                                             | 502300415                               | ,000      |
|                                             | 502300416                               | ,000      |
|                                             | 502300811                               | ,000      |
|                                             | 502300913                               | ,000      |
| weekday veckodag                            | 1 måndag                                |           |
|                                             | 2 tisdag                                |           |
|                                             | 3 onsdag                                |           |
|                                             | 4 torsdag                               |           |
|                                             | 5 fredag                                |           |
|                                             | 6 lördag                                |           |
|                                             | 7 söndag                                |           |
| season säsong/period                        | 1 januari-mars                          |           |
|                                             | 2 april-maj                             |           |
|                                             | 3 juni-augusti                          |           |
|                                             | 4 september-oktober                     |           |
|                                             | 5 november-december                     |           |
| bv2 belastning vs paoncil halva intervallet | 1 medelbelastning                       |           |
|                                             | 2 underbelastning                       |           |
|                                             | 3 överbelastning                        |           |
| holiday större helg                         | 1 ingen större helg                     |           |
|                                             | 2 större helg (påsk/midsommar/julonyår) |           |

## Categorical Variables Codings

|                                             |                                         | Parameter |
|---------------------------------------------|-----------------------------------------|-----------|
|                                             |                                         | (25)      |
|                                             | 404060001                               | ,000      |
|                                             | 404060002                               | ,000      |
|                                             | 404310003                               | 1,000     |
|                                             | 404310004                               | ,000      |
|                                             | 502300005                               | ,000      |
|                                             | 502300006                               | ,000      |
|                                             | 502300007                               | ,000      |
|                                             | 502300214                               | ,000      |
|                                             | 502300411                               | ,000      |
|                                             | 502300415                               | ,000      |
|                                             | 502300416                               | ,000      |
|                                             | 502300811                               | ,000      |
|                                             | 502300913                               | ,000      |
| weekday veckodag                            | 1 måndag                                |           |
|                                             | 2 tisdag                                |           |
|                                             | 3 onsdag                                |           |
|                                             | 4 torsdag                               |           |
|                                             | 5 fredag                                |           |
|                                             | 6 lördag                                |           |
|                                             | 7 söndag                                |           |
| season säsong/period                        | 1 januari-mars                          |           |
|                                             | 2 april-maj                             |           |
|                                             | 3 juni-augusti                          |           |
|                                             | 4 september-oktober                     |           |
|                                             | 5 november-december                     |           |
| bv2 belastning vs paoncil halva intervallet | 1 medelbelastning                       |           |
|                                             | 2 underbelastning                       |           |
|                                             | 3 överbelastning                        |           |
| holiday större helg                         | 1 ingen större helg                     |           |
|                                             | 2 större helg (påsk/midsommar/julonyår) |           |

## Categorical Variables Codings

|                                             |                                         | Parameter |
|---------------------------------------------|-----------------------------------------|-----------|
|                                             |                                         | (26)      |
|                                             | 404060001                               | ,000      |
|                                             | 404060002                               | ,000      |
|                                             | 404310003                               | ,000      |
|                                             | 404310004                               | 1,000     |
|                                             | 502300005                               | ,000      |
|                                             | 502300006                               | ,000      |
|                                             | 502300007                               | ,000      |
|                                             | 502300214                               | ,000      |
|                                             | 502300411                               | ,000      |
|                                             | 502300415                               | ,000      |
|                                             | 502300416                               | ,000      |
|                                             | 502300811                               | ,000      |
|                                             | 502300913                               | ,000      |
| weekday veckodag                            | 1 måndag                                |           |
|                                             | 2 tisdag                                |           |
|                                             | 3 onsdag                                |           |
|                                             | 4 torsdag                               |           |
|                                             | 5 fredag                                |           |
|                                             | 6 lördag                                |           |
|                                             | 7 söndag                                |           |
| season säsong/period                        | 1 januari-mars                          |           |
|                                             | 2 april-maj                             |           |
|                                             | 3 juni-augusti                          |           |
|                                             | 4 september-oktober                     |           |
|                                             | 5 november-december                     |           |
| bv2 belastning vs paoncil halva intervallet | 1 medelbelastning                       |           |
|                                             | 2 underbelastning                       |           |
|                                             | 3 överbelastning                        |           |
| holiday större helg                         | 1 ingen större helg                     |           |
|                                             | 2 större helg (påsk/midsommar/julonyår) |           |

## Categorical Variables Codings

|                                             |                                         | Parameter |
|---------------------------------------------|-----------------------------------------|-----------|
|                                             |                                         | (27)      |
|                                             | 404060001                               | ,000      |
|                                             | 404060002                               | ,000      |
|                                             | 404310003                               | ,000      |
|                                             | 404310004                               | ,000      |
|                                             | 502300005                               | 1,000     |
|                                             | 502300006                               | ,000      |
|                                             | 502300007                               | ,000      |
|                                             | 502300214                               | ,000      |
|                                             | 502300411                               | ,000      |
|                                             | 502300415                               | ,000      |
|                                             | 502300416                               | ,000      |
|                                             | 502300811                               | ,000      |
|                                             | 502300913                               | ,000      |
| weekday veckodag                            | 1 måndag                                |           |
|                                             | 2 tisdag                                |           |
|                                             | 3 onsdag                                |           |
|                                             | 4 torsdag                               |           |
|                                             | 5 fredag                                |           |
|                                             | 6 lördag                                |           |
|                                             | 7 söndag                                |           |
| season säsong/period                        | 1 januari-mars                          |           |
|                                             | 2 april-maj                             |           |
|                                             | 3 juni-augusti                          |           |
|                                             | 4 september-oktober                     |           |
|                                             | 5 november-december                     |           |
| bv2 belastning vs paoncil halva intervallet | 1 medelbelastning                       |           |
|                                             | 2 underbelastning                       |           |
|                                             | 3 överbelastning                        |           |
| holiday större helg                         | 1 ingen större helg                     |           |
|                                             | 2 större helg (påsk/midsommar/julonyår) |           |



## Categorical Variables Codings

|                                             |                                         | Parameter |
|---------------------------------------------|-----------------------------------------|-----------|
|                                             |                                         | (28)      |
|                                             | 404060001                               | ,000      |
|                                             | 404060002                               | ,000      |
|                                             | 404310003                               | ,000      |
|                                             | 404310004                               | ,000      |
|                                             | 502300005                               | ,000      |
|                                             | 502300006                               | 1,000     |
|                                             | 502300007                               | ,000      |
|                                             | 502300214                               | ,000      |
|                                             | 502300411                               | ,000      |
|                                             | 502300415                               | ,000      |
|                                             | 502300416                               | ,000      |
|                                             | 502300811                               | ,000      |
|                                             | 502300913                               | ,000      |
| weekday veckodag                            | 1 måndag                                |           |
|                                             | 2 tisdag                                |           |
|                                             | 3 onsdag                                |           |
|                                             | 4 torsdag                               |           |
|                                             | 5 fredag                                |           |
|                                             | 6 lördag                                |           |
|                                             | 7 söndag                                |           |
| season säsong/period                        | 1 januari-mars                          |           |
|                                             | 2 april-maj                             |           |
|                                             | 3 juni-augusti                          |           |
|                                             | 4 september-oktober                     |           |
|                                             | 5 november-december                     |           |
| bv2 belastning vs paoncil halva intervallet | 1 medelbelastning                       |           |
|                                             | 2 underbelastning                       |           |
|                                             | 3 överbelastning                        |           |
| holiday större helg                         | 1 ingen större helg                     |           |
|                                             | 2 större helg (påsk/midsommar/julonyår) |           |

## Categorical Variables Codings

|                                             |                                         | Parameter |
|---------------------------------------------|-----------------------------------------|-----------|
|                                             |                                         | (29)      |
|                                             | 404060001                               | ,000      |
|                                             | 404060002                               | ,000      |
|                                             | 404310003                               | ,000      |
|                                             | 404310004                               | ,000      |
|                                             | 502300005                               | ,000      |
|                                             | 502300006                               | ,000      |
|                                             | 502300007                               | 1,000     |
|                                             | 502300214                               | ,000      |
|                                             | 502300411                               | ,000      |
|                                             | 502300415                               | ,000      |
|                                             | 502300416                               | ,000      |
|                                             | 502300811                               | ,000      |
|                                             | 502300913                               | ,000      |
| weekday veckodag                            | 1 måndag                                |           |
|                                             | 2 tisdag                                |           |
|                                             | 3 onsdag                                |           |
|                                             | 4 torsdag                               |           |
|                                             | 5 fredag                                |           |
|                                             | 6 lördag                                |           |
|                                             | 7 söndag                                |           |
| season säsong/period                        | 1 januari-mars                          |           |
|                                             | 2 april-maj                             |           |
|                                             | 3 juni-augusti                          |           |
|                                             | 4 september-oktober                     |           |
|                                             | 5 november-december                     |           |
| bv2 belastning vs paoncil halva intervallet | 1 medelbelastning                       |           |
|                                             | 2 underbelastning                       |           |
|                                             | 3 överbelastning                        |           |
| holiday större helg                         | 1 ingen större helg                     |           |
|                                             | 2 större helg (påsk/midsommar/julonyår) |           |

## Categorical Variables Codings

|                                             |                                         | Parameter |
|---------------------------------------------|-----------------------------------------|-----------|
|                                             |                                         | (30)      |
|                                             | 404060001                               | ,000      |
|                                             | 404060002                               | ,000      |
|                                             | 404310003                               | ,000      |
|                                             | 404310004                               | ,000      |
|                                             | 502300005                               | ,000      |
|                                             | 502300006                               | ,000      |
|                                             | 502300007                               | ,000      |
|                                             | 502300214                               | 1,000     |
|                                             | 502300411                               | ,000      |
|                                             | 502300415                               | ,000      |
|                                             | 502300416                               | ,000      |
|                                             | 502300811                               | ,000      |
|                                             | 502300913                               | ,000      |
| weekday veckodag                            | 1 måndag                                |           |
|                                             | 2 tisdag                                |           |
|                                             | 3 onsdag                                |           |
|                                             | 4 torsdag                               |           |
|                                             | 5 fredag                                |           |
|                                             | 6 lördag                                |           |
|                                             | 7 söndag                                |           |
| season säsong/period                        | 1 januari-mars                          |           |
|                                             | 2 april-maj                             |           |
|                                             | 3 juni-augusti                          |           |
|                                             | 4 september-oktober                     |           |
|                                             | 5 november-december                     |           |
| bv2 belastning vs paoncil halva intervallet | 1 medelbelastning                       |           |
|                                             | 2 underbelastning                       |           |
|                                             | 3 överbelastning                        |           |
| holiday större helg                         | 1 ingen större helg                     |           |
|                                             | 2 större helg (påsk/midsommar/julonyår) |           |

## Categorical Variables Codings

|                                             |                                         | Parameter |
|---------------------------------------------|-----------------------------------------|-----------|
|                                             |                                         | (31)      |
|                                             | 404060001                               | ,000      |
|                                             | 404060002                               | ,000      |
|                                             | 404310003                               | ,000      |
|                                             | 404310004                               | ,000      |
|                                             | 502300005                               | ,000      |
|                                             | 502300006                               | ,000      |
|                                             | 502300007                               | ,000      |
|                                             | 502300214                               | ,000      |
|                                             | 502300411                               | 1,000     |
|                                             | 502300415                               | ,000      |
|                                             | 502300416                               | ,000      |
|                                             | 502300811                               | ,000      |
|                                             | 502300913                               | ,000      |
| weekday veckodag                            | 1 måndag                                |           |
|                                             | 2 tisdag                                |           |
|                                             | 3 onsdag                                |           |
|                                             | 4 torsdag                               |           |
|                                             | 5 fredag                                |           |
|                                             | 6 lördag                                |           |
|                                             | 7 söndag                                |           |
| season säsong/period                        | 1 januari-mars                          |           |
|                                             | 2 april-maj                             |           |
|                                             | 3 juni-augusti                          |           |
|                                             | 4 september-oktober                     |           |
|                                             | 5 november-december                     |           |
| bv2 belastning vs paoncil halva intervallet | 1 medelbelastning                       |           |
|                                             | 2 underbelastning                       |           |
|                                             | 3 överbelastning                        |           |
| holiday större helg                         | 1 ingen större helg                     |           |
|                                             | 2 större helg (påsk/midsommar/julonyår) |           |

## Categorical Variables Codings

|                                             |                                         | Parameter |
|---------------------------------------------|-----------------------------------------|-----------|
|                                             |                                         | (32)      |
|                                             | 404060001                               | ,000      |
|                                             | 404060002                               | ,000      |
|                                             | 404310003                               | ,000      |
|                                             | 404310004                               | ,000      |
|                                             | 502300005                               | ,000      |
|                                             | 502300006                               | ,000      |
|                                             | 502300007                               | ,000      |
|                                             | 502300214                               | ,000      |
|                                             | 502300411                               | ,000      |
|                                             | 502300415                               | 1,000     |
|                                             | 502300416                               | ,000      |
|                                             | 502300811                               | ,000      |
|                                             | 502300913                               | ,000      |
| weekday veckodag                            | 1 måndag                                |           |
|                                             | 2 tisdag                                |           |
|                                             | 3 onsdag                                |           |
|                                             | 4 torsdag                               |           |
|                                             | 5 fredag                                |           |
|                                             | 6 lördag                                |           |
|                                             | 7 söndag                                |           |
| season säsong/period                        | 1 januari-mars                          |           |
|                                             | 2 april-maj                             |           |
|                                             | 3 juni-augusti                          |           |
|                                             | 4 september-oktober                     |           |
|                                             | 5 november-december                     |           |
| bv2 belastning vs paoncil halva intervallet | 1 medelbelastning                       |           |
|                                             | 2 underbelastning                       |           |
|                                             | 3 överbelastning                        |           |
| holiday större helg                         | 1 ingen större helg                     |           |
|                                             | 2 större helg (påsk/midsommar/julonyår) |           |

## Categorical Variables Codings

|                                             |                                         | Parameter |
|---------------------------------------------|-----------------------------------------|-----------|
|                                             |                                         | (33)      |
|                                             | 404060001                               | ,000      |
|                                             | 404060002                               | ,000      |
|                                             | 404310003                               | ,000      |
|                                             | 404310004                               | ,000      |
|                                             | 502300005                               | ,000      |
|                                             | 502300006                               | ,000      |
|                                             | 502300007                               | ,000      |
|                                             | 502300214                               | ,000      |
|                                             | 502300411                               | ,000      |
|                                             | 502300415                               | ,000      |
|                                             | 502300416                               | 1,000     |
|                                             | 502300811                               | ,000      |
|                                             | 502300913                               | ,000      |
| weekday veckodag                            | 1 måndag                                |           |
|                                             | 2 tisdag                                |           |
|                                             | 3 onsdag                                |           |
|                                             | 4 torsdag                               |           |
|                                             | 5 fredag                                |           |
|                                             | 6 lördag                                |           |
|                                             | 7 söndag                                |           |
| season säsong/period                        | 1 januari-mars                          |           |
|                                             | 2 april-maj                             |           |
|                                             | 3 juni-augusti                          |           |
|                                             | 4 september-oktober                     |           |
|                                             | 5 november-december                     |           |
| bv2 belastning vs paoncil halva intervallet | 1 medelbelastning                       |           |
|                                             | 2 underbelastning                       |           |
|                                             | 3 överbelastning                        |           |
| holiday större helg                         | 1 ingen större helg                     |           |
|                                             | 2 större helg (påsk/midsommar/julonyår) |           |

## Categorical Variables Codings

|                                             |                                         | Parameter |
|---------------------------------------------|-----------------------------------------|-----------|
|                                             |                                         | (34)      |
|                                             | 404060001                               | ,000      |
|                                             | 404060002                               | ,000      |
|                                             | 404310003                               | ,000      |
|                                             | 404310004                               | ,000      |
|                                             | 502300005                               | ,000      |
|                                             | 502300006                               | ,000      |
|                                             | 502300007                               | ,000      |
|                                             | 502300214                               | ,000      |
|                                             | 502300411                               | ,000      |
|                                             | 502300415                               | ,000      |
|                                             | 502300416                               | ,000      |
|                                             | 502300811                               | 1,000     |
|                                             | 502300913                               | ,000      |
| weekday veckodag                            | 1 måndag                                |           |
|                                             | 2 tisdag                                |           |
|                                             | 3 onsdag                                |           |
|                                             | 4 torsdag                               |           |
|                                             | 5 fredag                                |           |
|                                             | 6 lördag                                |           |
|                                             | 7 söndag                                |           |
| season säsong/period                        | 1 januari-mars                          |           |
|                                             | 2 april-maj                             |           |
|                                             | 3 juni-augusti                          |           |
|                                             | 4 september-oktober                     |           |
|                                             | 5 november-december                     |           |
| bv2 belastning vs paoncil halva intervallet | 1 medelbelastning                       |           |
|                                             | 2 underbelastning                       |           |
|                                             | 3 överbelastning                        |           |
| holiday större helg                         | 1 ingen större helg                     |           |
|                                             | 2 större helg (påsk/midsommar/julonyår) |           |

## Categorical Variables Codings

|                                             |                                         | Paramete... |
|---------------------------------------------|-----------------------------------------|-------------|
|                                             |                                         | (35)        |
|                                             | 404060001                               | ,000        |
|                                             | 404060002                               | ,000        |
|                                             | 404310003                               | ,000        |
|                                             | 404310004                               | ,000        |
|                                             | 502300005                               | ,000        |
|                                             | 502300006                               | ,000        |
|                                             | 502300007                               | ,000        |
|                                             | 502300214                               | ,000        |
|                                             | 502300411                               | ,000        |
|                                             | 502300415                               | ,000        |
|                                             | 502300416                               | ,000        |
|                                             | 502300811                               | ,000        |
|                                             | 502300913                               | 1,000       |
| weekday veckodag                            | 1 måndag                                |             |
|                                             | 2 tisdag                                |             |
|                                             | 3 onsdag                                |             |
|                                             | 4 torsdag                               |             |
|                                             | 5 fredag                                |             |
|                                             | 6 lördag                                |             |
|                                             | 7 söndag                                |             |
| season säsong/period                        | 1 januari-mars                          |             |
|                                             | 2 april-maj                             |             |
|                                             | 3 juni-augusti                          |             |
|                                             | 4 september-oktober                     |             |
|                                             | 5 november-december                     |             |
| bv2 belastning vs paoncil halva intervallet | 1 medelbelastning                       |             |
|                                             | 2 underbelastning                       |             |
|                                             | 3 överbelastning                        |             |
| holiday större helg                         | 1 ingen större helg                     |             |
|                                             | 2 större helg (påsk/midsommar/julonyår) |             |

**Block 0: Beginning Block**



Classification Table<sup>a,b</sup>

| Observed           |                              |                     | Predicted                    |                     |
|--------------------|------------------------------|---------------------|------------------------------|---------------------|
|                    |                              |                     | hand01 händelse nej eller ja |                     |
|                    |                              |                     | 0 ingen händelse             | 1 minst en händelse |
| Step 0             | hand01 händelse nej eller ja | 0 ingen händelse    | 11108                        | 0                   |
|                    |                              | 1 minst en händelse | 1367                         | 0                   |
| Overall Percentage |                              |                     |                              |                     |

Classification Table<sup>a,b</sup>

| Observed           |                              |                     | Predicted          |
|--------------------|------------------------------|---------------------|--------------------|
|                    |                              |                     | Percentage Correct |
| Step 0             | hand01 händelse nej eller ja | 0 ingen händelse    | 100,0              |
|                    |                              | 1 minst en händelse | ,0                 |
| Overall Percentage |                              |                     | 89,0               |

a. Constant is included in the model.

b. The cut value is ,500

Variables in the Equation

|                 | B      | S.E. | Wald     | df | Sig. | Exp(B) |
|-----------------|--------|------|----------|----|------|--------|
| Step 0 Constant | -2,095 | ,029 | 5342,584 | 1  | ,000 | ,123   |

## Variables not in the Equation

|        |           |            | Score   | df | Sig. |
|--------|-----------|------------|---------|----|------|
| Step 0 | Variables | bv2        | 50,191  | 2  | ,000 |
|        |           | bv2(1)     | 44,434  | 1  | ,000 |
|        |           | bv2(2)     | 36,942  | 1  | ,000 |
|        |           | VASTY2     | 541,214 | 35 | ,000 |
|        |           | VASTY2(1)  | 1,169   | 1  | ,280 |
|        |           | VASTY2(2)  | 87,511  | 1  | ,000 |
|        |           | VASTY2(3)  | 13,995  | 1  | ,000 |
|        |           | VASTY2(4)  | ,464    | 1  | ,496 |
|        |           | VASTY2(5)  | 5,526   | 1  | ,019 |
|        |           | VASTY2(6)  | 19,435  | 1  | ,000 |
|        |           | VASTY2(7)  | 86,074  | 1  | ,000 |
|        |           | VASTY2(8)  | 1,043   | 1  | ,307 |
|        |           | VASTY2(9)  | ,408    | 1  | ,523 |
|        |           | VASTY2(10) | 58,583  | 1  | ,000 |
|        |           | VASTY2(11) | 33,445  | 1  | ,000 |
|        |           | VASTY2(12) | ,029    | 1  | ,865 |
|        |           | VASTY2(13) | 33,445  | 1  | ,000 |
|        |           | VASTY2(14) | 4,163   | 1  | ,041 |
|        |           | VASTY2(15) | ,464    | 1  | ,496 |
|        |           | VASTY2(16) | ,763    | 1  | ,382 |
|        |           | VASTY2(17) | 24,320  | 1  | ,000 |
|        |           | VASTY2(18) | 17,742  | 1  | ,000 |
|        |           | VASTY2(19) | 27,791  | 1  | ,000 |
|        |           | VASTY2(20) | ,015    | 1  | ,902 |
|        |           | VASTY2(21) | 2,890   | 1  | ,089 |
|        |           | VASTY2(22) | ,462    | 1  | ,497 |
|        |           | VASTY2(23) | 15,306  | 1  | ,000 |
|        |           | VASTY2(24) | 12,594  | 1  | ,000 |
|        |           | VASTY2(25) | ,128    | 1  | ,720 |
|        |           | VASTY2(26) | 12,864  | 1  | ,000 |
|        |           | VASTY2(27) | 24,439  | 1  | ,000 |
|        |           | VASTY2(28) | 9,963   | 1  | ,002 |
|        |           | VASTY2(29) | 18,184  | 1  | ,000 |
|        |           | VASTY2(30) | ,486    | 1  | ,486 |
|        |           | VASTY2(31) | 6,400   | 1  | ,011 |
|        |           | VASTY2(32) | 1,626   | 1  | ,202 |
|        |           | VASTY2(33) | 1,336   | 1  | ,248 |
|        |           | VASTY2(34) | 29,489  | 1  | ,000 |
|        |           | VASTY2(35) | 3,668   | 1  | ,055 |
|        |           | weekday    | 20,834  | 6  | ,002 |
|        |           | weekday(1) | ,196    | 1  | ,658 |
|        |           | weekday(2) | ,004    | 1  | ,951 |
|        |           | weekday(3) | 1,386   | 1  | ,239 |

**Variables not in the Equation**

|                    | Score   | df | Sig. |
|--------------------|---------|----|------|
| weekday(4)         | ,820    | 1  | ,365 |
| weekday(5)         | 20,097  | 1  | ,000 |
| weekday(6)         | 1,022   | 1  | ,312 |
| holiday(1)         | 4,862   | 1  | ,027 |
| season             | 15,673  | 4  | ,003 |
| season(1)          | ,214    | 1  | ,643 |
| season(2)          | 8,095   | 1  | ,004 |
| season(3)          | 10,213  | 1  | ,001 |
| season(4)          | ,313    | 1  | ,576 |
| Overall Statistics | 601,371 | 48 | ,000 |

**Block 1: Method = Enter**

**Omnibus Tests of Model Coefficients**

|             | Chi-square | df | Sig. |
|-------------|------------|----|------|
| Step 1 Step | 602,362    | 48 | ,000 |
| Block       | 602,362    | 48 | ,000 |
| Model       | 602,362    | 48 | ,000 |

**Model Summary**

| Step | -2 Log likelihood     | Cox & Snell R Square | Nagelkerke R Square |
|------|-----------------------|----------------------|---------------------|
| 1    | 8021,220 <sup>a</sup> | ,047                 | ,094                |

a. Estimation terminated at iteration number 6 because parameter estimates changed by less than ,001.

**Classification Table<sup>a</sup>**

| Observed           |                              | Predicted           |                     |
|--------------------|------------------------------|---------------------|---------------------|
|                    |                              | 0 ingen hændelse    | 1 minst en hændelse |
| Step 1             | hand01 hændelse nej eller ja | 0 ingen hændelse    | 11108               |
|                    |                              | 1 minst en hændelse | 1367                |
| Overall Percentage |                              |                     |                     |

**Classification Table<sup>a</sup>**

| Observed           |                              | Predicted          |
|--------------------|------------------------------|--------------------|
|                    |                              | Percentage Correct |
| Step 1             | hand01 hændelse nej eller ja | 100,0              |
|                    |                              | ,0                 |
| Overall Percentage |                              | 89,0               |

a. The cut value is ,500

## Variables in the Equation

|                     |            | B      | S.E. | Wald    | df | Sig. | Exp(B) |
|---------------------|------------|--------|------|---------|----|------|--------|
| Step 1 <sup>a</sup> | bv2        |        |      | 14,998  | 2  | ,001 |        |
|                     | bv2(1)     | -,159  | ,085 | 3,479   | 1  | ,062 | ,853   |
|                     | bv2(2)     | ,136   | ,077 | 3,085   | 1  | ,079 | 1,145  |
|                     | VASTY2     |        |      | 440,228 | 35 | ,000 |        |
|                     | VASTY2(1)  | ,331   | ,240 | 1,899   | 1  | ,168 | 1,392  |
|                     | VASTY2(2)  | 1,200  | ,217 | 30,618  | 1  | ,000 | 3,322  |
|                     | VASTY2(3)  | -,796  | ,303 | 6,881   | 1  | ,009 | ,451   |
|                     | VASTY2(4)  | ,197   | ,243 | ,656    | 1  | ,418 | 1,218  |
|                     | VASTY2(5)  | -,377  | ,282 | 1,783   | 1  | ,182 | ,686   |
|                     | VASTY2(6)  | -1,012 | ,328 | 9,524   | 1  | ,002 | ,364   |
|                     | VASTY2(7)  | 1,113  | ,220 | 25,627  | 1  | ,000 | 3,044  |
|                     | VASTY2(8)  | ,273   | ,241 | 1,287   | 1  | ,257 | 1,314  |
|                     | VASTY2(9)  | ,203   | ,247 | ,677    | 1  | ,411 | 1,225  |
|                     | VASTY2(10) | 1,034  | ,220 | 22,142  | 1  | ,000 | 2,812  |
|                     | VASTY2(11) | ,887   | ,223 | 15,800  | 1  | ,000 | 2,428  |
|                     | VASTY2(12) | ,093   | ,248 | ,141    | 1  | ,707 | 1,098  |
|                     | VASTY2(13) | ,794   | ,225 | 12,453  | 1  | ,000 | 2,212  |
|                     | VASTY2(14) | -,275  | ,268 | 1,052   | 1  | ,305 | ,760   |
|                     | VASTY2(15) | ,234   | ,243 | ,932    | 1  | ,334 | 1,264  |
|                     | VASTY2(16) | ,268   | ,289 | ,859    | 1  | ,354 | 1,307  |
|                     | VASTY2(17) | -1,179 | ,356 | 10,983  | 1  | ,001 | ,308   |
|                     | VASTY2(18) | -,878  | ,320 | 7,519   | 1  | ,006 | ,416   |
|                     | VASTY2(19) | -1,280 | ,385 | 11,041  | 1  | ,001 | ,278   |
|                     | VASTY2(20) | ,052   | ,261 | ,040    | 1  | ,842 | 1,053  |
|                     | VASTY2(21) | -,174  | ,263 | ,436    | 1  | ,509 | ,841   |
|                     | VASTY2(22) | ,141   | ,253 | ,313    | 1  | ,576 | 1,152  |
|                     | VASTY2(23) | ,703   | ,228 | 9,503   | 1  | ,002 | 2,019  |
|                     | VASTY2(24) | ,563   | ,230 | 5,983   | 1  | ,014 | 1,756  |
|                     | VASTY2(25) | ,079   | ,265 | ,090    | 1  | ,764 | 1,083  |
|                     | VASTY2(26) | -,888  | ,337 | 6,946   | 1  | ,008 | ,411   |
|                     | VASTY2(27) | -1,290 | ,356 | 13,101  | 1  | ,000 | ,275   |
|                     | VASTY2(28) | -,948  | ,372 | 6,510   | 1  | ,011 | ,387   |
|                     | VASTY2(29) | -,936  | ,320 | 8,560   | 1  | ,003 | ,392   |
|                     | VASTY2(30) | ,004   | ,252 | ,000    | 1  | ,987 | 1,004  |
|                     | VASTY2(31) | ,510   | ,233 | 4,771   | 1  | ,029 | 1,665  |
|                     | VASTY2(32) | -,052  | ,259 | ,040    | 1  | ,841 | ,949   |
|                     | VASTY2(33) | -,033  | ,257 | ,016    | 1  | ,898 | ,968   |
|                     | VASTY2(34) | -1,567 | ,401 | 15,279  | 1  | ,000 | ,209   |
|                     | VASTY2(35) | ,365   | ,244 | 2,239   | 1  | ,135 | 1,440  |
|                     | weekday    |        |      | 18,655  | 6  | ,005 |        |

## Variables in the Equation

|                     |            | 95% C.I. for EXP(B) |       |
|---------------------|------------|---------------------|-------|
|                     |            | Lower               | Upper |
| Step 1 <sup>a</sup> | bv2        |                     |       |
|                     | bv2(1)     | ,722                | 1,008 |
|                     | bv2(2)     | ,984                | 1,333 |
|                     | VASTY2     |                     |       |
|                     | VASTY2(1)  | ,870                | 2,229 |
|                     | VASTY2(2)  | 2,171               | 5,082 |
|                     | VASTY2(3)  | ,249                | ,818  |
|                     | VASTY2(4)  | ,756                | 1,962 |
|                     | VASTY2(5)  | ,395                | 1,193 |
|                     | VASTY2(6)  | ,191                | ,691  |
|                     | VASTY2(7)  | 1,978               | 4,684 |
|                     | VASTY2(8)  | ,820                | 2,106 |
|                     | VASTY2(9)  | ,755                | 1,987 |
|                     | VASTY2(10) | 1,828               | 4,326 |
|                     | VASTY2(11) | 1,568               | 3,759 |
|                     | VASTY2(12) | ,675                | 1,786 |
|                     | VASTY2(13) | 1,423               | 3,438 |
|                     | VASTY2(14) | ,449                | 1,284 |
|                     | VASTY2(15) | ,786                | 2,033 |
|                     | VASTY2(16) | ,742                | 2,301 |
|                     | VASTY2(17) | ,153                | ,618  |
|                     | VASTY2(18) | ,222                | ,779  |
|                     | VASTY2(19) | ,131                | ,592  |
|                     | VASTY2(20) | ,631                | 1,758 |
|                     | VASTY2(21) | ,502                | 1,408 |
|                     | VASTY2(22) | ,702                | 1,891 |
|                     | VASTY2(23) | 1,292               | 3,157 |
|                     | VASTY2(24) | 1,118               | 2,758 |
|                     | VASTY2(25) | ,645                | 1,819 |
|                     | VASTY2(26) | ,212                | ,796  |
|                     | VASTY2(27) | ,137                | ,554  |
|                     | VASTY2(28) | ,187                | ,803  |
|                     | VASTY2(29) | ,209                | ,734  |
|                     | VASTY2(30) | ,612                | 1,647 |
|                     | VASTY2(31) | 1,054               | 2,630 |
|                     | VASTY2(32) | ,571                | 1,579 |
|                     | VASTY2(33) | ,584                | 1,602 |
|                     | VASTY2(34) | ,095                | ,458  |
|                     | VASTY2(35) | ,893                | 2,322 |
|                     | weekday    |                     |       |

review only

## Variables in the Equation

|            | B      | S.E. | Wald    | df | Sig. | Exp(B) |
|------------|--------|------|---------|----|------|--------|
| weekday(1) | -,027  | ,107 | ,065    | 1  | ,799 | ,973   |
| weekday(2) | -,060  | ,108 | ,311    | 1  | ,577 | ,942   |
| weekday(3) | ,021   | ,107 | ,040    | 1  | ,842 | 1,022  |
| weekday(4) | ,021   | ,107 | ,039    | 1  | ,844 | 1,021  |
| weekday(5) | -,401  | ,119 | 11,402  | 1  | ,001 | ,670   |
| weekday(6) | ,047   | ,108 | ,189    | 1  | ,664 | 1,048  |
| holiday(1) | -,472  | ,201 | 5,496   | 1  | ,019 | ,624   |
| season     |        |      | 13,991  | 4  | ,007 |        |
| season(1)  | -,076  | ,092 | ,676    | 1  | ,411 | ,927   |
| season(2)  | -,188  | ,088 | 4,572   | 1  | ,032 | ,829   |
| season(3)  | ,152   | ,088 | 3,004   | 1  | ,083 | 1,165  |
| season(4)  | -,031  | ,093 | ,109    | 1  | ,741 | ,970   |
| Constant   | -2,144 | ,206 | 108,644 | 1  | ,000 | ,117   |

## Variables in the Equation

|            | 95% C.I. for EXP(B) |       |
|------------|---------------------|-------|
|            | Lower               | Upper |
| weekday(1) | ,788                | 1,201 |
| weekday(2) | ,762                | 1,164 |
| weekday(3) | ,829                | 1,259 |
| weekday(4) | ,828                | 1,260 |
| weekday(5) | ,531                | ,845  |
| weekday(6) | ,848                | 1,296 |
| holiday(1) | ,420                | ,926  |
| season     |                     |       |
| season(1)  | ,774                | 1,111 |
| season(2)  | ,698                | ,984  |
| season(3)  | ,980                | 1,383 |
| season(4)  | ,808                | 1,164 |
| Constant   |                     |       |

a. Variable(s) entered on step 1: bv2, VASTY2, weekday, holiday, season.

LOGISTIC REGRESSION VARIABLES hand01

/METHOD=ENTER bv3 VASTY2 weekday holiday season

/CONTRAST (bv3)=Indicator(1)

/CONTRAST (VASTY2)=Indicator(1)

/CONTRAST (weekday)=Indicator(1)

/CONTRAST (holiday)=Indicator(1)

/CONTRAST (season)=Indicator(1)

/PRINT=CI(95)

/CRITERIA=PIN(0.05) POUT(0.10) ITERATE(20) CUT(0.5).

## Logistic Regression

[DataSet6] C:\cWordjan\Rafaela\_VCS\alla\_tillsammans\abo\_bjo\_vasa\_v1.sav

### Case Processing Summary

| Unweighted Cases <sup>a</sup> |                      | N     | Percent |
|-------------------------------|----------------------|-------|---------|
| Selected Cases                | Included in Analysis | 12475 | 100,0   |
|                               | Missing Cases        | 0     | ,0      |
|                               | Total                | 12475 | 100,0   |
| Unselected Cases              |                      | 0     | ,0      |
| Total                         |                      | 12475 | 100,0   |

a. If weight is in effect, see classification table for the total number of cases.

### Dependent Variable Encoding

| Original Value      | Internal Value |
|---------------------|----------------|
| 0 ingen händelse    | 0              |
| 1 minst en händelse | 1              |

### Categorical Variables Codings

|                           | Frequency |
|---------------------------|-----------|
| VASTY2 (SAIR*10000)+VASTY | 365       |
| 403073101                 | 362       |
| 403073102                 | 365       |
| 403073103                 | 365       |
| 403073202                 | 365       |
| 403073203                 | 365       |
| 403073204                 | 330       |
| 403073303                 | 364       |
| 403073651                 | 362       |
| 403073771                 | 365       |
| 403133102                 | 341       |
| 403133106                 | 365       |
| 403133107                 | 365       |
| 403133109                 | 365       |
| 403133202                 | 365       |
| 403133203                 | 365       |
| 403133204                 | 365       |
| 403133315                 | 177       |
| 403133322                 | 365       |
| 403133401                 | 362       |
| 403133402                 | 365       |
| 403133550                 | 298       |
| 403133772                 | 365       |
| 403135803                 | 365       |

## Categorical Variables Codings

|                           |           | Parameter |
|---------------------------|-----------|-----------|
|                           |           | (1)       |
| VASTY2 (SAIR*10000)+VASTY | 403073101 | ,000      |
|                           | 403073102 | 1,000     |
|                           | 403073103 | ,000      |
|                           | 403073202 | ,000      |
|                           | 403073203 | ,000      |
|                           | 403073204 | ,000      |
|                           | 403073303 | ,000      |
|                           | 403073651 | ,000      |
|                           | 403073771 | ,000      |
|                           | 403133102 | ,000      |
|                           | 403133106 | ,000      |
|                           | 403133107 | ,000      |
|                           | 403133109 | ,000      |
|                           | 403133202 | ,000      |
|                           | 403133203 | ,000      |
|                           | 403133204 | ,000      |
|                           | 403133315 | ,000      |
|                           | 403133322 | ,000      |
|                           | 403133401 | ,000      |
|                           | 403133402 | ,000      |
|                           | 403133550 | ,000      |
|                           | 403133772 | ,000      |
|                           | 403135803 | ,000      |



1  
2  
3  
4  
5  
6  
7  
8  
9  
10  
11  
12  
13  
14  
15  
16  
17  
18  
19  
20  
21  
22  
23  
24  
25  
26  
27  
28  
29  
30  
31  
32  
33  
34  
35  
36  
37  
38  
39  
40  
41  
42  
43  
44  
45  
46  
47  
48  
49  
50  
51  
52  
53  
54  
55  
56  
57  
58  
59  
60

**Categorical Variables Codings**

|                           |           | Parameter |
|---------------------------|-----------|-----------|
|                           |           | (2)       |
| VASTY2 (SAIR*10000)+VASTY | 403073101 | ,000      |
|                           | 403073102 | ,000      |
|                           | 403073103 | 1,000     |
|                           | 403073202 | ,000      |
|                           | 403073203 | ,000      |
|                           | 403073204 | ,000      |
|                           | 403073303 | ,000      |
|                           | 403073651 | ,000      |
|                           | 403073771 | ,000      |
|                           | 403133102 | ,000      |
|                           | 403133106 | ,000      |
|                           | 403133107 | ,000      |
|                           | 403133109 | ,000      |
|                           | 403133202 | ,000      |
|                           | 403133203 | ,000      |
|                           | 403133204 | ,000      |
|                           | 403133315 | ,000      |
|                           | 403133322 | ,000      |
|                           | 403133401 | ,000      |
|                           | 403133402 | ,000      |
|                           | 403133550 | ,000      |
|                           | 403133772 | ,000      |
|                           | 403135803 | ,000      |

For peer review only

## Categorical Variables Codings

|                           |           | Parameter |
|---------------------------|-----------|-----------|
|                           |           | (3)       |
| VASTY2 (SAIR*10000)+VASTY | 403073101 | ,000      |
|                           | 403073102 | ,000      |
|                           | 403073103 | ,000      |
|                           | 403073202 | 1,000     |
|                           | 403073203 | ,000      |
|                           | 403073204 | ,000      |
|                           | 403073303 | ,000      |
|                           | 403073651 | ,000      |
|                           | 403073771 | ,000      |
|                           | 403133102 | ,000      |
|                           | 403133106 | ,000      |
|                           | 403133107 | ,000      |
|                           | 403133109 | ,000      |
|                           | 403133202 | ,000      |
|                           | 403133203 | ,000      |
|                           | 403133204 | ,000      |
|                           | 403133315 | ,000      |
|                           | 403133322 | ,000      |
|                           | 403133401 | ,000      |
|                           | 403133402 | ,000      |
|                           | 403133550 | ,000      |
|                           | 403133772 | ,000      |
|                           | 403135803 | ,000      |

## Categorical Variables Codings

|                           |           | Parameter |
|---------------------------|-----------|-----------|
|                           |           | (4)       |
| VASTY2 (SAIR*10000)+VASTY | 403073101 | ,000      |
|                           | 403073102 | ,000      |
|                           | 403073103 | ,000      |
|                           | 403073202 | ,000      |
|                           | 403073203 | 1,000     |
|                           | 403073204 | ,000      |
|                           | 403073303 | ,000      |
|                           | 403073651 | ,000      |
|                           | 403073771 | ,000      |
|                           | 403133102 | ,000      |
|                           | 403133106 | ,000      |
|                           | 403133107 | ,000      |
|                           | 403133109 | ,000      |
|                           | 403133202 | ,000      |
|                           | 403133203 | ,000      |
|                           | 403133204 | ,000      |
|                           | 403133315 | ,000      |
|                           | 403133322 | ,000      |
|                           | 403133401 | ,000      |
|                           | 403133402 | ,000      |
|                           | 403133550 | ,000      |
|                           | 403133772 | ,000      |
|                           | 403135803 | ,000      |

## Categorical Variables Codings

|                           |           | Parameter |
|---------------------------|-----------|-----------|
|                           |           | (5)       |
| VASTY2 (SAIR*10000)+VASTY | 403073101 | ,000      |
|                           | 403073102 | ,000      |
|                           | 403073103 | ,000      |
|                           | 403073202 | ,000      |
|                           | 403073203 | ,000      |
|                           | 403073204 | 1,000     |
|                           | 403073303 | ,000      |
|                           | 403073651 | ,000      |
|                           | 403073771 | ,000      |
|                           | 403133102 | ,000      |
|                           | 403133106 | ,000      |
|                           | 403133107 | ,000      |
|                           | 403133109 | ,000      |
|                           | 403133202 | ,000      |
|                           | 403133203 | ,000      |
|                           | 403133204 | ,000      |
|                           | 403133315 | ,000      |
|                           | 403133322 | ,000      |
|                           | 403133401 | ,000      |
|                           | 403133402 | ,000      |
|                           | 403133550 | ,000      |
|                           | 403133772 | ,000      |
|                           | 403135803 | ,000      |

1  
2  
3  
4  
5  
6  
7  
8  
9  
10  
11  
12  
13  
14  
15  
16  
17  
18  
19  
20  
21  
22  
23  
24  
25  
26  
27  
28  
29  
30  
31  
32  
33  
34  
35  
36  
37  
38  
39  
40  
41  
42  
43  
44  
45  
46  
47  
48  
49  
50  
51  
52  
53  
54  
55  
56  
57  
58  
59  
60

**Categorical Variables Codings**

|                           |           | Parameter |
|---------------------------|-----------|-----------|
|                           |           | (6)       |
| VASTY2 (SAIR*10000)+VASTY | 403073101 | ,000      |
|                           | 403073102 | ,000      |
|                           | 403073103 | ,000      |
|                           | 403073202 | ,000      |
|                           | 403073203 | ,000      |
|                           | 403073204 | ,000      |
|                           | 403073303 | 1,000     |
|                           | 403073651 | ,000      |
|                           | 403073771 | ,000      |
|                           | 403133102 | ,000      |
|                           | 403133106 | ,000      |
|                           | 403133107 | ,000      |
|                           | 403133109 | ,000      |
|                           | 403133202 | ,000      |
|                           | 403133203 | ,000      |
|                           | 403133204 | ,000      |
|                           | 403133315 | ,000      |
|                           | 403133322 | ,000      |
|                           | 403133401 | ,000      |
|                           | 403133402 | ,000      |
|                           | 403133550 | ,000      |
|                           | 403133772 | ,000      |
|                           | 403135803 | ,000      |

For peer review only

## Categorical Variables Codings

|                           |           | Parameter |
|---------------------------|-----------|-----------|
|                           |           | (7)       |
| VASTY2 (SAIR*10000)+VASTY | 403073101 | ,000      |
|                           | 403073102 | ,000      |
|                           | 403073103 | ,000      |
|                           | 403073202 | ,000      |
|                           | 403073203 | ,000      |
|                           | 403073204 | ,000      |
|                           | 403073303 | ,000      |
|                           | 403073651 | 1,000     |
|                           | 403073771 | ,000      |
|                           | 403133102 | ,000      |
|                           | 403133106 | ,000      |
|                           | 403133107 | ,000      |
|                           | 403133109 | ,000      |
|                           | 403133202 | ,000      |
|                           | 403133203 | ,000      |
|                           | 403133204 | ,000      |
|                           | 403133315 | ,000      |
|                           | 403133322 | ,000      |
|                           | 403133401 | ,000      |
|                           | 403133402 | ,000      |
|                           | 403133550 | ,000      |
|                           | 403133772 | ,000      |
|                           | 403135803 | ,000      |

1  
2  
3  
4  
5  
6  
7  
8  
9  
10  
11  
12  
13  
14  
15  
16  
17  
18  
19  
20  
21  
22  
23  
24  
25  
26  
27  
28  
29  
30  
31  
32  
33  
34  
35  
36  
37  
38  
39  
40  
41  
42  
43  
44  
45  
46  
47  
48  
49  
50  
51  
52  
53  
54  
55  
56  
57  
58  
59  
60

**Categorical Variables Codings**

|                           |           | Parameter |
|---------------------------|-----------|-----------|
|                           |           | (8)       |
| VASTY2 (SAIR*10000)+VASTY | 403073101 | ,000      |
|                           | 403073102 | ,000      |
|                           | 403073103 | ,000      |
|                           | 403073202 | ,000      |
|                           | 403073203 | ,000      |
|                           | 403073204 | ,000      |
|                           | 403073303 | ,000      |
|                           | 403073651 | ,000      |
|                           | 403073771 | 1,000     |
|                           | 403133102 | ,000      |
|                           | 403133106 | ,000      |
|                           | 403133107 | ,000      |
|                           | 403133109 | ,000      |
|                           | 403133202 | ,000      |
|                           | 403133203 | ,000      |
|                           | 403133204 | ,000      |
|                           | 403133315 | ,000      |
|                           | 403133322 | ,000      |
|                           | 403133401 | ,000      |
|                           | 403133402 | ,000      |
|                           | 403133550 | ,000      |
|                           | 403133772 | ,000      |
|                           | 403135803 | ,000      |

For peer review only

## Categorical Variables Codings

|                           |           | Parameter |
|---------------------------|-----------|-----------|
|                           |           | (9)       |
| VASTY2 (SAIR*10000)+VASTY | 403073101 | ,000      |
|                           | 403073102 | ,000      |
|                           | 403073103 | ,000      |
|                           | 403073202 | ,000      |
|                           | 403073203 | ,000      |
|                           | 403073204 | ,000      |
|                           | 403073303 | ,000      |
|                           | 403073651 | ,000      |
|                           | 403073771 | ,000      |
|                           | 403133102 | 1,000     |
|                           | 403133106 | ,000      |
|                           | 403133107 | ,000      |
|                           | 403133109 | ,000      |
|                           | 403133202 | ,000      |
|                           | 403133203 | ,000      |
|                           | 403133204 | ,000      |
|                           | 403133315 | ,000      |
|                           | 403133322 | ,000      |
|                           | 403133401 | ,000      |
|                           | 403133402 | ,000      |
|                           | 403133550 | ,000      |
|                           | 403133772 | ,000      |
|                           | 403135803 | ,000      |



**Categorical Variables Codings**

|                           |           | Parameter |
|---------------------------|-----------|-----------|
|                           |           | (10)      |
| VASTY2 (SAIR*10000)+VASTY | 403073101 | ,000      |
|                           | 403073102 | ,000      |
|                           | 403073103 | ,000      |
|                           | 403073202 | ,000      |
|                           | 403073203 | ,000      |
|                           | 403073204 | ,000      |
|                           | 403073303 | ,000      |
|                           | 403073651 | ,000      |
|                           | 403073771 | ,000      |
|                           | 403133102 | ,000      |
|                           | 403133106 | 1,000     |
|                           | 403133107 | ,000      |
|                           | 403133109 | ,000      |
|                           | 403133202 | ,000      |
|                           | 403133203 | ,000      |
|                           | 403133204 | ,000      |
|                           | 403133315 | ,000      |
|                           | 403133322 | ,000      |
|                           | 403133401 | ,000      |
|                           | 403133402 | ,000      |
|                           | 403133550 | ,000      |
|                           | 403133772 | ,000      |
|                           | 403135803 | ,000      |

Peer Review Only

## Categorical Variables Codings

|                           |           | Parameter |
|---------------------------|-----------|-----------|
|                           |           | (11)      |
| VASTY2 (SAIR*10000)+VASTY | 403073101 | ,000      |
|                           | 403073102 | ,000      |
|                           | 403073103 | ,000      |
|                           | 403073202 | ,000      |
|                           | 403073203 | ,000      |
|                           | 403073204 | ,000      |
|                           | 403073303 | ,000      |
|                           | 403073651 | ,000      |
|                           | 403073771 | ,000      |
|                           | 403133102 | ,000      |
|                           | 403133106 | ,000      |
|                           | 403133107 | 1,000     |
|                           | 403133109 | ,000      |
|                           | 403133202 | ,000      |
|                           | 403133203 | ,000      |
|                           | 403133204 | ,000      |
|                           | 403133315 | ,000      |
|                           | 403133322 | ,000      |
|                           | 403133401 | ,000      |
|                           | 403133402 | ,000      |
|                           | 403133550 | ,000      |
|                           | 403133772 | ,000      |
|                           | 403135803 | ,000      |

1  
2  
3  
4  
5  
6  
7  
8  
9  
10  
11  
12  
13  
14  
15  
16  
17  
18  
19  
20  
21  
22  
23  
24  
25  
26  
27  
28  
29  
30  
31  
32  
33  
34  
35  
36  
37  
38  
39  
40  
41  
42  
43  
44  
45  
46  
47  
48  
49  
50  
51  
52  
53  
54  
55  
56  
57  
58  
59  
60

**Categorical Variables Codings**

|                           |           | Parameter |
|---------------------------|-----------|-----------|
|                           |           | (12)      |
| VASTY2 (SAIR*10000)+VASTY | 403073101 | ,000      |
|                           | 403073102 | ,000      |
|                           | 403073103 | ,000      |
|                           | 403073202 | ,000      |
|                           | 403073203 | ,000      |
|                           | 403073204 | ,000      |
|                           | 403073303 | ,000      |
|                           | 403073651 | ,000      |
|                           | 403073771 | ,000      |
|                           | 403133102 | ,000      |
|                           | 403133106 | ,000      |
|                           | 403133107 | ,000      |
|                           | 403133109 | 1,000     |
|                           | 403133202 | ,000      |
|                           | 403133203 | ,000      |
|                           | 403133204 | ,000      |
|                           | 403133315 | ,000      |
|                           | 403133322 | ,000      |
|                           | 403133401 | ,000      |
|                           | 403133402 | ,000      |
|                           | 403133550 | ,000      |
|                           | 403133772 | ,000      |
|                           | 403135803 | ,000      |

For peer review only

## Categorical Variables Codings

|                           |           | Parameter |
|---------------------------|-----------|-----------|
|                           |           | (13)      |
| VASTY2 (SAIR*10000)+VASTY | 403073101 | ,000      |
|                           | 403073102 | ,000      |
|                           | 403073103 | ,000      |
|                           | 403073202 | ,000      |
|                           | 403073203 | ,000      |
|                           | 403073204 | ,000      |
|                           | 403073303 | ,000      |
|                           | 403073651 | ,000      |
|                           | 403073771 | ,000      |
|                           | 403133102 | ,000      |
|                           | 403133106 | ,000      |
|                           | 403133107 | ,000      |
|                           | 403133109 | ,000      |
|                           | 403133202 | 1,000     |
|                           | 403133203 | ,000      |
|                           | 403133204 | ,000      |
|                           | 403133315 | ,000      |
|                           | 403133322 | ,000      |
|                           | 403133401 | ,000      |
|                           | 403133402 | ,000      |
|                           | 403133550 | ,000      |
|                           | 403133772 | ,000      |
|                           | 403135803 | ,000      |

1  
2  
3  
4  
5  
6  
7  
8  
9  
10  
11  
12  
13  
14  
15  
16  
17  
18  
19  
20  
21  
22  
23  
24  
25  
26  
27  
28  
29  
30  
31  
32  
33  
34  
35  
36  
37  
38  
39  
40  
41  
42  
43  
44  
45  
46  
47  
48  
49  
50  
51  
52  
53  
54  
55  
56  
57  
58  
59  
60

**Categorical Variables Codings**

|                           |           | Parameter |
|---------------------------|-----------|-----------|
|                           |           | (14)      |
| VASTY2 (SAIR*10000)+VASTY | 403073101 | ,000      |
|                           | 403073102 | ,000      |
|                           | 403073103 | ,000      |
|                           | 403073202 | ,000      |
|                           | 403073203 | ,000      |
|                           | 403073204 | ,000      |
|                           | 403073303 | ,000      |
|                           | 403073651 | ,000      |
|                           | 403073771 | ,000      |
|                           | 403133102 | ,000      |
|                           | 403133106 | ,000      |
|                           | 403133107 | ,000      |
|                           | 403133109 | ,000      |
|                           | 403133202 | ,000      |
|                           | 403133203 | 1,000     |
|                           | 403133204 | ,000      |
|                           | 403133315 | ,000      |
|                           | 403133322 | ,000      |
|                           | 403133401 | ,000      |
|                           | 403133402 | ,000      |
|                           | 403133550 | ,000      |
|                           | 403133772 | ,000      |
|                           | 403135803 | ,000      |

Peer Review Only

## Categorical Variables Codings

|                           |           | Parameter |
|---------------------------|-----------|-----------|
|                           |           | (15)      |
| VASTY2 (SAIR*10000)+VASTY | 403073101 | ,000      |
|                           | 403073102 | ,000      |
|                           | 403073103 | ,000      |
|                           | 403073202 | ,000      |
|                           | 403073203 | ,000      |
|                           | 403073204 | ,000      |
|                           | 403073303 | ,000      |
|                           | 403073651 | ,000      |
|                           | 403073771 | ,000      |
|                           | 403133102 | ,000      |
|                           | 403133106 | ,000      |
|                           | 403133107 | ,000      |
|                           | 403133109 | ,000      |
|                           | 403133202 | ,000      |
|                           | 403133203 | ,000      |
|                           | 403133204 | 1,000     |
|                           | 403133315 | ,000      |
|                           | 403133322 | ,000      |
|                           | 403133401 | ,000      |
|                           | 403133402 | ,000      |
|                           | 403133550 | ,000      |
|                           | 403133772 | ,000      |
|                           | 403135803 | ,000      |

1  
2  
3  
4  
5  
6  
7  
8  
9  
10  
11  
12  
13  
14  
15  
16  
17  
18  
19  
20  
21  
22  
23  
24  
25  
26  
27  
28  
29  
30  
31  
32  
33  
34  
35  
36  
37  
38  
39  
40  
41  
42  
43  
44  
45  
46  
47  
48  
49  
50  
51  
52  
53  
54  
55  
56  
57  
58  
59  
60

**Categorical Variables Codings**

|                           |           | Parameter |
|---------------------------|-----------|-----------|
|                           |           | (16)      |
| VASTY2 (SAIR*10000)+VASTY | 403073101 | ,000      |
|                           | 403073102 | ,000      |
|                           | 403073103 | ,000      |
|                           | 403073202 | ,000      |
|                           | 403073203 | ,000      |
|                           | 403073204 | ,000      |
|                           | 403073303 | ,000      |
|                           | 403073651 | ,000      |
|                           | 403073771 | ,000      |
|                           | 403133102 | ,000      |
|                           | 403133106 | ,000      |
|                           | 403133107 | ,000      |
|                           | 403133109 | ,000      |
|                           | 403133202 | ,000      |
|                           | 403133203 | ,000      |
|                           | 403133204 | ,000      |
|                           | 403133315 | 1,000     |
|                           | 403133322 | ,000      |
|                           | 403133401 | ,000      |
|                           | 403133402 | ,000      |
|                           | 403133550 | ,000      |
|                           | 403133772 | ,000      |
|                           | 403135803 | ,000      |

Peer Review Only

## Categorical Variables Codings

|                           |           | Parameter |
|---------------------------|-----------|-----------|
|                           |           | (17)      |
| VASTY2 (SAIR*10000)+VASTY | 403073101 | ,000      |
|                           | 403073102 | ,000      |
|                           | 403073103 | ,000      |
|                           | 403073202 | ,000      |
|                           | 403073203 | ,000      |
|                           | 403073204 | ,000      |
|                           | 403073303 | ,000      |
|                           | 403073651 | ,000      |
|                           | 403073771 | ,000      |
|                           | 403133102 | ,000      |
|                           | 403133106 | ,000      |
|                           | 403133107 | ,000      |
|                           | 403133109 | ,000      |
|                           | 403133202 | ,000      |
|                           | 403133203 | ,000      |
|                           | 403133204 | ,000      |
|                           | 403133315 | ,000      |
|                           | 403133322 | 1,000     |
|                           | 403133401 | ,000      |
|                           | 403133402 | ,000      |
|                           | 403133550 | ,000      |
|                           | 403133772 | ,000      |
|                           | 403135803 | ,000      |



1  
2  
3  
4  
5  
6  
7  
8  
9  
10  
11  
12  
13  
14  
15  
16  
17  
18  
19  
20  
21  
22  
23  
24  
25  
26  
27  
28  
29  
30  
31  
32  
33  
34  
35  
36  
37  
38  
39  
40  
41  
42  
43  
44  
45  
46  
47  
48  
49  
50  
51  
52  
53  
54  
55  
56  
57  
58  
59  
60

**Categorical Variables Codings**

|                           |           | Parameter |
|---------------------------|-----------|-----------|
|                           |           | (18)      |
| VASTY2 (SAIR*10000)+VASTY | 403073101 | ,000      |
|                           | 403073102 | ,000      |
|                           | 403073103 | ,000      |
|                           | 403073202 | ,000      |
|                           | 403073203 | ,000      |
|                           | 403073204 | ,000      |
|                           | 403073303 | ,000      |
|                           | 403073651 | ,000      |
|                           | 403073771 | ,000      |
|                           | 403133102 | ,000      |
|                           | 403133106 | ,000      |
|                           | 403133107 | ,000      |
|                           | 403133109 | ,000      |
|                           | 403133202 | ,000      |
|                           | 403133203 | ,000      |
|                           | 403133204 | ,000      |
|                           | 403133315 | ,000      |
|                           | 403133322 | ,000      |
|                           | 403133401 | 1,000     |
|                           | 403133402 | ,000      |
|                           | 403133550 | ,000      |
|                           | 403133772 | ,000      |
|                           | 403135803 | ,000      |

For peer review only

## Categorical Variables Codings

|                           |           | Parameter |
|---------------------------|-----------|-----------|
|                           |           | (19)      |
| VASTY2 (SAIR*10000)+VASTY | 403073101 | ,000      |
|                           | 403073102 | ,000      |
|                           | 403073103 | ,000      |
|                           | 403073202 | ,000      |
|                           | 403073203 | ,000      |
|                           | 403073204 | ,000      |
|                           | 403073303 | ,000      |
|                           | 403073651 | ,000      |
|                           | 403073771 | ,000      |
|                           | 403133102 | ,000      |
|                           | 403133106 | ,000      |
|                           | 403133107 | ,000      |
|                           | 403133109 | ,000      |
|                           | 403133202 | ,000      |
|                           | 403133203 | ,000      |
|                           | 403133204 | ,000      |
|                           | 403133315 | ,000      |
|                           | 403133322 | ,000      |
|                           | 403133401 | ,000      |
|                           | 403133402 | 1,000     |
|                           | 403133550 | ,000      |
|                           | 403133772 | ,000      |
|                           | 403135803 | ,000      |

1  
2  
3  
4  
5  
6  
7  
8  
9  
10  
11  
12  
13  
14  
15  
16  
17  
18  
19  
20  
21  
22  
23  
24  
25  
26  
27  
28  
29  
30  
31  
32  
33  
34  
35  
36  
37  
38  
39  
40  
41  
42  
43  
44  
45  
46  
47  
48  
49  
50  
51  
52  
53  
54  
55  
56  
57  
58  
59  
60

**Categorical Variables Codings**

|                           |           | Parameter |
|---------------------------|-----------|-----------|
|                           |           | (20)      |
| VASTY2 (SAIR*10000)+VASTY | 403073101 | ,000      |
|                           | 403073102 | ,000      |
|                           | 403073103 | ,000      |
|                           | 403073202 | ,000      |
|                           | 403073203 | ,000      |
|                           | 403073204 | ,000      |
|                           | 403073303 | ,000      |
|                           | 403073651 | ,000      |
|                           | 403073771 | ,000      |
|                           | 403133102 | ,000      |
|                           | 403133106 | ,000      |
|                           | 403133107 | ,000      |
|                           | 403133109 | ,000      |
|                           | 403133202 | ,000      |
|                           | 403133203 | ,000      |
|                           | 403133204 | ,000      |
|                           | 403133315 | ,000      |
|                           | 403133322 | ,000      |
|                           | 403133401 | ,000      |
|                           | 403133402 | ,000      |
|                           | 403133550 | 1,000     |
|                           | 403133772 | ,000      |
|                           | 403135803 | ,000      |

For peer review only

## Categorical Variables Codings

|                           |           | Parameter |
|---------------------------|-----------|-----------|
|                           |           | (21)      |
| VASTY2 (SAIR*10000)+VASTY | 403073101 | ,000      |
|                           | 403073102 | ,000      |
|                           | 403073103 | ,000      |
|                           | 403073202 | ,000      |
|                           | 403073203 | ,000      |
|                           | 403073204 | ,000      |
|                           | 403073303 | ,000      |
|                           | 403073651 | ,000      |
|                           | 403073771 | ,000      |
|                           | 403133102 | ,000      |
|                           | 403133106 | ,000      |
|                           | 403133107 | ,000      |
|                           | 403133109 | ,000      |
|                           | 403133202 | ,000      |
|                           | 403133203 | ,000      |
|                           | 403133204 | ,000      |
|                           | 403133315 | ,000      |
|                           | 403133322 | ,000      |
|                           | 403133401 | ,000      |
|                           | 403133402 | ,000      |
|                           | 403133550 | ,000      |
|                           | 403133772 | 1,000     |
|                           | 403135803 | ,000      |

## Categorical Variables Codings

|                           |           | Parameter |
|---------------------------|-----------|-----------|
|                           |           | (22)      |
| VASTY2 (SAIR*10000)+VASTY | 403073101 | ,000      |
|                           | 403073102 | ,000      |
|                           | 403073103 | ,000      |
|                           | 403073202 | ,000      |
|                           | 403073203 | ,000      |
|                           | 403073204 | ,000      |
|                           | 403073303 | ,000      |
|                           | 403073651 | ,000      |
|                           | 403073771 | ,000      |
|                           | 403133102 | ,000      |
|                           | 403133106 | ,000      |
|                           | 403133107 | ,000      |
|                           | 403133109 | ,000      |
|                           | 403133202 | ,000      |
|                           | 403133203 | ,000      |
|                           | 403133204 | ,000      |
|                           | 403133315 | ,000      |
|                           | 403133322 | ,000      |
|                           | 403133401 | ,000      |
|                           | 403133402 | ,000      |
|                           | 403133550 | ,000      |
|                           | 403133772 | ,000      |
|                           | 403135803 | 1,000     |

## Categorical Variables Codings

|                           |           | Parameter |
|---------------------------|-----------|-----------|
|                           |           | (23)      |
| VASTY2 (SAIR*10000)+VASTY | 403073101 | ,000      |
|                           | 403073102 | ,000      |
|                           | 403073103 | ,000      |
|                           | 403073202 | ,000      |
|                           | 403073203 | ,000      |
|                           | 403073204 | ,000      |
|                           | 403073303 | ,000      |
|                           | 403073651 | ,000      |
|                           | 403073771 | ,000      |
|                           | 403133102 | ,000      |
|                           | 403133106 | ,000      |
|                           | 403133107 | ,000      |
|                           | 403133109 | ,000      |
|                           | 403133202 | ,000      |
|                           | 403133203 | ,000      |
|                           | 403133204 | ,000      |
|                           | 403133315 | ,000      |
|                           | 403133322 | ,000      |
|                           | 403133401 | ,000      |
|                           | 403133402 | ,000      |
|                           | 403133550 | ,000      |
|                           | 403133772 | ,000      |
|                           | 403135803 | ,000      |

1  
2  
3  
4  
5  
6  
7  
8  
9  
10  
11  
12  
13  
14  
15  
16  
17  
18  
19  
20  
21  
22  
23  
24  
25  
26  
27  
28  
29  
30  
31  
32  
33  
34  
35  
36  
37  
38  
39  
40  
41  
42  
43  
44  
45  
46  
47  
48  
49  
50  
51  
52  
53  
54  
55  
56  
57  
58  
59  
60

**Categorical Variables Codings**

|                           |           | Parameter |
|---------------------------|-----------|-----------|
|                           |           | (24)      |
| VASTY2 (SAIR*10000)+VASTY | 403073101 | ,000      |
|                           | 403073102 | ,000      |
|                           | 403073103 | ,000      |
|                           | 403073202 | ,000      |
|                           | 403073203 | ,000      |
|                           | 403073204 | ,000      |
|                           | 403073303 | ,000      |
|                           | 403073651 | ,000      |
|                           | 403073771 | ,000      |
|                           | 403133102 | ,000      |
|                           | 403133106 | ,000      |
|                           | 403133107 | ,000      |
|                           | 403133109 | ,000      |
|                           | 403133202 | ,000      |
|                           | 403133203 | ,000      |
|                           | 403133204 | ,000      |
|                           | 403133315 | ,000      |
|                           | 403133322 | ,000      |
|                           | 403133401 | ,000      |
|                           | 403133402 | ,000      |
|                           | 403133550 | ,000      |
|                           | 403133772 | ,000      |
|                           | 403135803 | ,000      |

Peer Review Only

## Categorical Variables Codings

|                           |           | Parameter |
|---------------------------|-----------|-----------|
|                           |           | (25)      |
| VASTY2 (SAIR*10000)+VASTY | 403073101 | ,000      |
|                           | 403073102 | ,000      |
|                           | 403073103 | ,000      |
|                           | 403073202 | ,000      |
|                           | 403073203 | ,000      |
|                           | 403073204 | ,000      |
|                           | 403073303 | ,000      |
|                           | 403073651 | ,000      |
|                           | 403073771 | ,000      |
|                           | 403133102 | ,000      |
|                           | 403133106 | ,000      |
|                           | 403133107 | ,000      |
|                           | 403133109 | ,000      |
|                           | 403133202 | ,000      |
|                           | 403133203 | ,000      |
|                           | 403133204 | ,000      |
|                           | 403133315 | ,000      |
|                           | 403133322 | ,000      |
|                           | 403133401 | ,000      |
|                           | 403133402 | ,000      |
|                           | 403133550 | ,000      |
|                           | 403133772 | ,000      |
|                           | 403135803 | ,000      |



1  
2  
3  
4  
5  
6  
7  
8  
9  
10  
11  
12  
13  
14  
15  
16  
17  
18  
19  
20  
21  
22  
23  
24  
25  
26  
27  
28  
29  
30  
31  
32  
33  
34  
35  
36  
37  
38  
39  
40  
41  
42  
43  
44  
45  
46  
47  
48  
49  
50  
51  
52  
53  
54  
55  
56  
57  
58  
59  
60

**Categorical Variables Codings**

|                           |           | Parameter |
|---------------------------|-----------|-----------|
|                           |           | (26)      |
| VASTY2 (SAIR*10000)+VASTY | 403073101 | ,000      |
|                           | 403073102 | ,000      |
|                           | 403073103 | ,000      |
|                           | 403073202 | ,000      |
|                           | 403073203 | ,000      |
|                           | 403073204 | ,000      |
|                           | 403073303 | ,000      |
|                           | 403073651 | ,000      |
|                           | 403073771 | ,000      |
|                           | 403133102 | ,000      |
|                           | 403133106 | ,000      |
|                           | 403133107 | ,000      |
|                           | 403133109 | ,000      |
|                           | 403133202 | ,000      |
|                           | 403133203 | ,000      |
|                           | 403133204 | ,000      |
|                           | 403133315 | ,000      |
|                           | 403133322 | ,000      |
|                           | 403133401 | ,000      |
|                           | 403133402 | ,000      |
|                           | 403133550 | ,000      |
|                           | 403133772 | ,000      |
|                           | 403135803 | ,000      |

For peer review only

## Categorical Variables Codings

|                           |           | Parameter |
|---------------------------|-----------|-----------|
|                           |           | (27)      |
| VASTY2 (SAIR*10000)+VASTY | 403073101 | ,000      |
|                           | 403073102 | ,000      |
|                           | 403073103 | ,000      |
|                           | 403073202 | ,000      |
|                           | 403073203 | ,000      |
|                           | 403073204 | ,000      |
|                           | 403073303 | ,000      |
|                           | 403073651 | ,000      |
|                           | 403073771 | ,000      |
|                           | 403133102 | ,000      |
|                           | 403133106 | ,000      |
|                           | 403133107 | ,000      |
|                           | 403133109 | ,000      |
|                           | 403133202 | ,000      |
|                           | 403133203 | ,000      |
|                           | 403133204 | ,000      |
|                           | 403133315 | ,000      |
|                           | 403133322 | ,000      |
|                           | 403133401 | ,000      |
|                           | 403133402 | ,000      |
|                           | 403133550 | ,000      |
|                           | 403133772 | ,000      |
|                           | 403135803 | ,000      |

1  
2  
3  
4  
5  
6  
7  
8  
9  
10  
11  
12  
13  
14  
15  
16  
17  
18  
19  
20  
21  
22  
23  
24  
25  
26  
27  
28  
29  
30  
31  
32  
33  
34  
35  
36  
37  
38  
39  
40  
41  
42  
43  
44  
45  
46  
47  
48  
49  
50  
51  
52  
53  
54  
55  
56  
57  
58  
59  
60

**Categorical Variables Codings**

|                           |           | Parameter |
|---------------------------|-----------|-----------|
|                           |           | (28)      |
| VASTY2 (SAIR*10000)+VASTY | 403073101 | ,000      |
|                           | 403073102 | ,000      |
|                           | 403073103 | ,000      |
|                           | 403073202 | ,000      |
|                           | 403073203 | ,000      |
|                           | 403073204 | ,000      |
|                           | 403073303 | ,000      |
|                           | 403073651 | ,000      |
|                           | 403073771 | ,000      |
|                           | 403133102 | ,000      |
|                           | 403133106 | ,000      |
|                           | 403133107 | ,000      |
|                           | 403133109 | ,000      |
|                           | 403133202 | ,000      |
|                           | 403133203 | ,000      |
|                           | 403133204 | ,000      |
|                           | 403133315 | ,000      |
|                           | 403133322 | ,000      |
|                           | 403133401 | ,000      |
|                           | 403133402 | ,000      |
|                           | 403133550 | ,000      |
|                           | 403133772 | ,000      |
|                           | 403135803 | ,000      |

Peer Review Only

## Categorical Variables Codings

|                           |           | Parameter |
|---------------------------|-----------|-----------|
|                           |           | (29)      |
| VASTY2 (SAIR*10000)+VASTY | 403073101 | ,000      |
|                           | 403073102 | ,000      |
|                           | 403073103 | ,000      |
|                           | 403073202 | ,000      |
|                           | 403073203 | ,000      |
|                           | 403073204 | ,000      |
|                           | 403073303 | ,000      |
|                           | 403073651 | ,000      |
|                           | 403073771 | ,000      |
|                           | 403133102 | ,000      |
|                           | 403133106 | ,000      |
|                           | 403133107 | ,000      |
|                           | 403133109 | ,000      |
|                           | 403133202 | ,000      |
|                           | 403133203 | ,000      |
|                           | 403133204 | ,000      |
|                           | 403133315 | ,000      |
|                           | 403133322 | ,000      |
|                           | 403133401 | ,000      |
|                           | 403133402 | ,000      |
|                           | 403133550 | ,000      |
|                           | 403133772 | ,000      |
|                           | 403135803 | ,000      |

1  
2  
3  
4  
5  
6  
7  
8  
9  
10  
11  
12  
13  
14  
15  
16  
17  
18  
19  
20  
21  
22  
23  
24  
25  
26  
27  
28  
29  
30  
31  
32  
33  
34  
35  
36  
37  
38  
39  
40  
41  
42  
43  
44  
45  
46  
47  
48  
49  
50  
51  
52  
53  
54  
55  
56  
57  
58  
59  
60

**Categorical Variables Codings**

|                           |           | Parameter |
|---------------------------|-----------|-----------|
|                           |           | (30)      |
| VASTY2 (SAIR*10000)+VASTY | 403073101 | ,000      |
|                           | 403073102 | ,000      |
|                           | 403073103 | ,000      |
|                           | 403073202 | ,000      |
|                           | 403073203 | ,000      |
|                           | 403073204 | ,000      |
|                           | 403073303 | ,000      |
|                           | 403073651 | ,000      |
|                           | 403073771 | ,000      |
|                           | 403133102 | ,000      |
|                           | 403133106 | ,000      |
|                           | 403133107 | ,000      |
|                           | 403133109 | ,000      |
|                           | 403133202 | ,000      |
|                           | 403133203 | ,000      |
|                           | 403133204 | ,000      |
|                           | 403133315 | ,000      |
|                           | 403133322 | ,000      |
|                           | 403133401 | ,000      |
|                           | 403133402 | ,000      |
|                           | 403133550 | ,000      |
|                           | 403133772 | ,000      |
|                           | 403135803 | ,000      |

For peer review only

## Categorical Variables Codings

|                           |           | Parameter |
|---------------------------|-----------|-----------|
|                           |           | (31)      |
| VASTY2 (SAIR*10000)+VASTY | 403073101 | ,000      |
|                           | 403073102 | ,000      |
|                           | 403073103 | ,000      |
|                           | 403073202 | ,000      |
|                           | 403073203 | ,000      |
|                           | 403073204 | ,000      |
|                           | 403073303 | ,000      |
|                           | 403073651 | ,000      |
|                           | 403073771 | ,000      |
|                           | 403133102 | ,000      |
|                           | 403133106 | ,000      |
|                           | 403133107 | ,000      |
|                           | 403133109 | ,000      |
|                           | 403133202 | ,000      |
|                           | 403133203 | ,000      |
|                           | 403133204 | ,000      |
|                           | 403133315 | ,000      |
|                           | 403133322 | ,000      |
|                           | 403133401 | ,000      |
|                           | 403133402 | ,000      |
|                           | 403133550 | ,000      |
|                           | 403133772 | ,000      |
|                           | 403135803 | ,000      |

## Categorical Variables Codings

|                           |           | Parameter |
|---------------------------|-----------|-----------|
|                           |           | (32)      |
| VASTY2 (SAIR*10000)+VASTY | 403073101 | ,000      |
|                           | 403073102 | ,000      |
|                           | 403073103 | ,000      |
|                           | 403073202 | ,000      |
|                           | 403073203 | ,000      |
|                           | 403073204 | ,000      |
|                           | 403073303 | ,000      |
|                           | 403073651 | ,000      |
|                           | 403073771 | ,000      |
|                           | 403133102 | ,000      |
|                           | 403133106 | ,000      |
|                           | 403133107 | ,000      |
|                           | 403133109 | ,000      |
|                           | 403133202 | ,000      |
|                           | 403133203 | ,000      |
|                           | 403133204 | ,000      |
|                           | 403133315 | ,000      |
|                           | 403133322 | ,000      |
|                           | 403133401 | ,000      |
|                           | 403133402 | ,000      |
|                           | 403133550 | ,000      |
|                           | 403133772 | ,000      |
|                           | 403135803 | ,000      |

## Categorical Variables Codings

|                           |           | Parameter |
|---------------------------|-----------|-----------|
|                           |           | (33)      |
| VASTY2 (SAIR*10000)+VASTY | 403073101 | ,000      |
|                           | 403073102 | ,000      |
|                           | 403073103 | ,000      |
|                           | 403073202 | ,000      |
|                           | 403073203 | ,000      |
|                           | 403073204 | ,000      |
|                           | 403073303 | ,000      |
|                           | 403073651 | ,000      |
|                           | 403073771 | ,000      |
|                           | 403133102 | ,000      |
|                           | 403133106 | ,000      |
|                           | 403133107 | ,000      |
|                           | 403133109 | ,000      |
|                           | 403133202 | ,000      |
|                           | 403133203 | ,000      |
|                           | 403133204 | ,000      |
|                           | 403133315 | ,000      |
|                           | 403133322 | ,000      |
|                           | 403133401 | ,000      |
|                           | 403133402 | ,000      |
|                           | 403133550 | ,000      |
|                           | 403133772 | ,000      |
|                           | 403135803 | ,000      |



1  
2  
3  
4  
5  
6  
7  
8  
9  
10  
11  
12  
13  
14  
15  
16  
17  
18  
19  
20  
21  
22  
23  
24  
25  
26  
27  
28  
29  
30  
31  
32  
33  
34  
35  
36  
37  
38  
39  
40  
41  
42  
43  
44  
45  
46  
47  
48  
49  
50  
51  
52  
53  
54  
55  
56  
57  
58  
59  
60

**Categorical Variables Codings**

|                           |           | Parameter |
|---------------------------|-----------|-----------|
|                           |           | (34)      |
| VASTY2 (SAIR*10000)+VASTY | 403073101 | ,000      |
|                           | 403073102 | ,000      |
|                           | 403073103 | ,000      |
|                           | 403073202 | ,000      |
|                           | 403073203 | ,000      |
|                           | 403073204 | ,000      |
|                           | 403073303 | ,000      |
|                           | 403073651 | ,000      |
|                           | 403073771 | ,000      |
|                           | 403133102 | ,000      |
|                           | 403133106 | ,000      |
|                           | 403133107 | ,000      |
|                           | 403133109 | ,000      |
|                           | 403133202 | ,000      |
|                           | 403133203 | ,000      |
|                           | 403133204 | ,000      |
|                           | 403133315 | ,000      |
|                           | 403133322 | ,000      |
|                           | 403133401 | ,000      |
|                           | 403133402 | ,000      |
|                           | 403133550 | ,000      |
|                           | 403133772 | ,000      |
|                           | 403135803 | ,000      |

For peer review only

## Categorical Variables Codings

|                           |           | Paramete... |
|---------------------------|-----------|-------------|
|                           |           | (35)        |
| VASTY2 (SAIR*10000)+VASTY | 403073101 | ,000        |
|                           | 403073102 | ,000        |
|                           | 403073103 | ,000        |
|                           | 403073202 | ,000        |
|                           | 403073203 | ,000        |
|                           | 403073204 | ,000        |
|                           | 403073303 | ,000        |
|                           | 403073651 | ,000        |
|                           | 403073771 | ,000        |
|                           | 403133102 | ,000        |
|                           | 403133106 | ,000        |
|                           | 403133107 | ,000        |
|                           | 403133109 | ,000        |
|                           | 403133202 | ,000        |
|                           | 403133203 | ,000        |
|                           | 403133204 | ,000        |
|                           | 403133315 | ,000        |
|                           | 403133322 | ,000        |
|                           | 403133401 | ,000        |
|                           | 403133402 | ,000        |
|                           | 403133550 | ,000        |
|                           | 403133772 | ,000        |
|                           | 403135803 | ,000        |

## Categorical Variables Codings

|                                              |                                         | Frequency |
|----------------------------------------------|-----------------------------------------|-----------|
|                                              | 404060001                               | 365       |
|                                              | 404060002                               | 366       |
|                                              | 404310003                               | 291       |
|                                              | 404310004                               | 291       |
|                                              | 502300005                               | 366       |
|                                              | 502300006                               | 225       |
|                                              | 502300007                               | 366       |
|                                              | 502300214                               | 366       |
|                                              | 502300411                               | 366       |
|                                              | 502300415                               | 360       |
|                                              | 502300416                               | 363       |
|                                              | 502300811                               | 364       |
|                                              | 502300913                               | 315       |
| weekday veckodag                             | 1 måndag                                | 1805      |
|                                              | 2 tisdag                                | 1812      |
|                                              | 3 onsdag                                | 1800      |
|                                              | 4 torsdag                               | 1794      |
|                                              | 5 fredag                                | 1788      |
|                                              | 6 lördag                                | 1735      |
|                                              | 7 söndag                                | 1741      |
| season säsong/period                         | 1 januari-mars                          | 3182      |
|                                              | 2 april-maj                             | 2127      |
|                                              | 3 juni-augusti                          | 2911      |
|                                              | 4 september-oktober                     | 2144      |
|                                              | 5 november-december                     | 2111      |
| bv3 belasnting vs paoncil dubbla intervallet | 1 medelbelastning                       | 9121      |
|                                              | 2 underbelastning                       | 1505      |
|                                              | 3 överbelastning                        | 1849      |
| holiday större helg                          | 1 ingen större helg                     | 12078     |
|                                              | 2 större helg (påsk/midsommar/julonyår) | 397       |

## Categorical Variables Codings

|                                              |                                         | Parameter |
|----------------------------------------------|-----------------------------------------|-----------|
|                                              |                                         | (1)       |
|                                              | 404060001                               | ,000      |
|                                              | 404060002                               | ,000      |
|                                              | 404310003                               | ,000      |
|                                              | 404310004                               | ,000      |
|                                              | 502300005                               | ,000      |
|                                              | 502300006                               | ,000      |
|                                              | 502300007                               | ,000      |
|                                              | 502300214                               | ,000      |
|                                              | 502300411                               | ,000      |
|                                              | 502300415                               | ,000      |
|                                              | 502300416                               | ,000      |
|                                              | 502300811                               | ,000      |
|                                              | 502300913                               | ,000      |
| weekday veckodag                             | 1 måndag                                | ,000      |
|                                              | 2 tisdag                                | 1,000     |
|                                              | 3 onsdag                                | ,000      |
|                                              | 4 torsdag                               | ,000      |
|                                              | 5 fredag                                | ,000      |
|                                              | 6 lördag                                | ,000      |
|                                              | 7 söndag                                | ,000      |
| season säsong/period                         | 1 januari-mars                          | ,000      |
|                                              | 2 april-maj                             | 1,000     |
|                                              | 3 juni-augusti                          | ,000      |
|                                              | 4 september-oktober                     | ,000      |
|                                              | 5 november-december                     | ,000      |
| bv3 belasnting vs paoncil dubbla intervallet | 1 medelbelastning                       | ,000      |
|                                              | 2 underbelastning                       | 1,000     |
|                                              | 3 överbelastning                        | ,000      |
| holiday större helg                          | 1 ingen större helg                     | ,000      |
|                                              | 2 större helg (påsk/midsommar/julonyår) | 1,000     |

## Categorical Variables Codings

|                                              |                                         | Parameter |
|----------------------------------------------|-----------------------------------------|-----------|
|                                              |                                         | (2)       |
|                                              | 404060001                               | ,000      |
|                                              | 404060002                               | ,000      |
|                                              | 404310003                               | ,000      |
|                                              | 404310004                               | ,000      |
|                                              | 502300005                               | ,000      |
|                                              | 502300006                               | ,000      |
|                                              | 502300007                               | ,000      |
|                                              | 502300214                               | ,000      |
|                                              | 502300411                               | ,000      |
|                                              | 502300415                               | ,000      |
|                                              | 502300416                               | ,000      |
|                                              | 502300811                               | ,000      |
|                                              | 502300913                               | ,000      |
| weekday veckodag                             | 1 måndag                                | ,000      |
|                                              | 2 tisdag                                | ,000      |
|                                              | 3 onsdag                                | 1,000     |
|                                              | 4 torsdag                               | ,000      |
|                                              | 5 fredag                                | ,000      |
|                                              | 6 lördag                                | ,000      |
|                                              | 7 söndag                                | ,000      |
| season säsong/period                         | 1 januari-mars                          | ,000      |
|                                              | 2 april-maj                             | ,000      |
|                                              | 3 juni-augusti                          | 1,000     |
|                                              | 4 september-oktober                     | ,000      |
|                                              | 5 november-december                     | ,000      |
| bv3 belasnting vs paoncil dubbla intervallet | 1 medelbelastning                       | ,000      |
|                                              | 2 underbelastning                       | ,000      |
|                                              | 3 överbelastning                        | 1,000     |
| holiday större helg                          | 1 ingen större helg                     |           |
|                                              | 2 större helg (påsk/midsommar/julonyår) |           |

## Categorical Variables Codings

|                                              |                                         | Parameter |
|----------------------------------------------|-----------------------------------------|-----------|
|                                              |                                         | (3)       |
|                                              | 404060001                               | ,000      |
|                                              | 404060002                               | ,000      |
|                                              | 404310003                               | ,000      |
|                                              | 404310004                               | ,000      |
|                                              | 502300005                               | ,000      |
|                                              | 502300006                               | ,000      |
|                                              | 502300007                               | ,000      |
|                                              | 502300214                               | ,000      |
|                                              | 502300411                               | ,000      |
|                                              | 502300415                               | ,000      |
|                                              | 502300416                               | ,000      |
|                                              | 502300811                               | ,000      |
|                                              | 502300913                               | ,000      |
| weekday veckodag                             | 1 måndag                                | ,000      |
|                                              | 2 tisdag                                | ,000      |
|                                              | 3 onsdag                                | ,000      |
|                                              | 4 torsdag                               | 1,000     |
|                                              | 5 fredag                                | ,000      |
|                                              | 6 lördag                                | ,000      |
|                                              | 7 söndag                                | ,000      |
| season säsong/period                         | 1 januari-mars                          | ,000      |
|                                              | 2 april-maj                             | ,000      |
|                                              | 3 juni-augusti                          | ,000      |
|                                              | 4 september-oktober                     | 1,000     |
|                                              | 5 november-december                     | ,000      |
| bv3 belasnting vs paoncil dubbla intervallet | 1 medelbelastning                       |           |
|                                              | 2 underbelastning                       |           |
|                                              | 3 överbelastning                        |           |
| holiday större helg                          | 1 ingen större helg                     |           |
|                                              | 2 större helg (påsk/midsommar/julonyår) |           |

## Categorical Variables Codings

|                                              |                                         | Parameter |
|----------------------------------------------|-----------------------------------------|-----------|
|                                              |                                         | (4)       |
|                                              | 404060001                               | ,000      |
|                                              | 404060002                               | ,000      |
|                                              | 404310003                               | ,000      |
|                                              | 404310004                               | ,000      |
|                                              | 502300005                               | ,000      |
|                                              | 502300006                               | ,000      |
|                                              | 502300007                               | ,000      |
|                                              | 502300214                               | ,000      |
|                                              | 502300411                               | ,000      |
|                                              | 502300415                               | ,000      |
|                                              | 502300416                               | ,000      |
|                                              | 502300811                               | ,000      |
|                                              | 502300913                               | ,000      |
| weekday veckodag                             | 1 måndag                                | ,000      |
|                                              | 2 tisdag                                | ,000      |
|                                              | 3 onsdag                                | ,000      |
|                                              | 4 torsdag                               | ,000      |
|                                              | 5 fredag                                | 1,000     |
|                                              | 6 lördag                                | ,000      |
|                                              | 7 söndag                                | ,000      |
| season säsong/period                         | 1 januari-mars                          | ,000      |
|                                              | 2 april-maj                             | ,000      |
|                                              | 3 juni-augusti                          | ,000      |
|                                              | 4 september-oktober                     | ,000      |
|                                              | 5 november-december                     | 1,000     |
| bv3 belasnting vs paoncil dubbla intervallet | 1 medelbelastning                       |           |
|                                              | 2 underbelastning                       |           |
|                                              | 3 överbelastning                        |           |
| holiday större helg                          | 1 ingen större helg                     |           |
|                                              | 2 större helg (påsk/midsommar/julonyår) |           |

## Categorical Variables Codings

|                                              |                                         | Parameter |
|----------------------------------------------|-----------------------------------------|-----------|
|                                              |                                         | (5)       |
|                                              | 404060001                               | ,000      |
|                                              | 404060002                               | ,000      |
|                                              | 404310003                               | ,000      |
|                                              | 404310004                               | ,000      |
|                                              | 502300005                               | ,000      |
|                                              | 502300006                               | ,000      |
|                                              | 502300007                               | ,000      |
|                                              | 502300214                               | ,000      |
|                                              | 502300411                               | ,000      |
|                                              | 502300415                               | ,000      |
|                                              | 502300416                               | ,000      |
|                                              | 502300811                               | ,000      |
|                                              | 502300913                               | ,000      |
| weekday veckodag                             | 1 måndag                                | ,000      |
|                                              | 2 tisdag                                | ,000      |
|                                              | 3 onsdag                                | ,000      |
|                                              | 4 torsdag                               | ,000      |
|                                              | 5 fredag                                | ,000      |
|                                              | 6 lördag                                | 1,000     |
|                                              | 7 söndag                                | ,000      |
| season säsong/period                         | 1 januari-mars                          |           |
|                                              | 2 april-maj                             |           |
|                                              | 3 juni-augusti                          |           |
|                                              | 4 september-oktober                     |           |
|                                              | 5 november-december                     |           |
| bv3 belastning vs paoncil dubbla intervallet | 1 medelbelastning                       |           |
|                                              | 2 underbelastning                       |           |
|                                              | 3 överbelastning                        |           |
| holiday större helg                          | 1 ingen större helg                     |           |
|                                              | 2 större helg (påsk/midsommar/julonyår) |           |



## Categorical Variables Codings

|                                              |                                         | Parameter |
|----------------------------------------------|-----------------------------------------|-----------|
|                                              |                                         | (6)       |
|                                              | 404060001                               | ,000      |
|                                              | 404060002                               | ,000      |
|                                              | 404310003                               | ,000      |
|                                              | 404310004                               | ,000      |
|                                              | 502300005                               | ,000      |
|                                              | 502300006                               | ,000      |
|                                              | 502300007                               | ,000      |
|                                              | 502300214                               | ,000      |
|                                              | 502300411                               | ,000      |
|                                              | 502300415                               | ,000      |
|                                              | 502300416                               | ,000      |
|                                              | 502300811                               | ,000      |
|                                              | 502300913                               | ,000      |
| weekday veckodag                             | 1 måndag                                | ,000      |
|                                              | 2 tisdag                                | ,000      |
|                                              | 3 onsdag                                | ,000      |
|                                              | 4 torsdag                               | ,000      |
|                                              | 5 fredag                                | ,000      |
|                                              | 6 lördag                                | ,000      |
|                                              | 7 söndag                                | 1,000     |
| season säsong/period                         | 1 januari-mars                          |           |
|                                              | 2 april-maj                             |           |
|                                              | 3 juni-augusti                          |           |
|                                              | 4 september-oktober                     |           |
|                                              | 5 november-december                     |           |
| bv3 belasnting vs paoncil dubbla intervallet | 1 medelbelastning                       |           |
|                                              | 2 underbelastning                       |           |
|                                              | 3 överbelastning                        |           |
| holiday större helg                          | 1 ingen större helg                     |           |
|                                              | 2 större helg (påsk/midsommar/julonyår) |           |

## Categorical Variables Codings

|                                              |                                         | Parameter |
|----------------------------------------------|-----------------------------------------|-----------|
|                                              |                                         | (7)       |
|                                              | 404060001                               | ,000      |
|                                              | 404060002                               | ,000      |
|                                              | 404310003                               | ,000      |
|                                              | 404310004                               | ,000      |
|                                              | 502300005                               | ,000      |
|                                              | 502300006                               | ,000      |
|                                              | 502300007                               | ,000      |
|                                              | 502300214                               | ,000      |
|                                              | 502300411                               | ,000      |
|                                              | 502300415                               | ,000      |
|                                              | 502300416                               | ,000      |
|                                              | 502300811                               | ,000      |
|                                              | 502300913                               | ,000      |
| weekday veckodag                             | 1 måndag                                |           |
|                                              | 2 tisdag                                |           |
|                                              | 3 onsdag                                |           |
|                                              | 4 torsdag                               |           |
|                                              | 5 fredag                                |           |
|                                              | 6 lördag                                |           |
|                                              | 7 söndag                                |           |
| season säsong/period                         | 1 januari-mars                          |           |
|                                              | 2 april-maj                             |           |
|                                              | 3 juni-augusti                          |           |
|                                              | 4 september-oktober                     |           |
|                                              | 5 november-december                     |           |
| bv3 belastning vs paoncil dubbla intervallet | 1 medelbelastning                       |           |
|                                              | 2 underbelastning                       |           |
|                                              | 3 överbelastning                        |           |
| holiday större helg                          | 1 ingen större helg                     |           |
|                                              | 2 större helg (påsk/midsommar/julonyår) |           |

## Categorical Variables Codings

|                                              |                                         | Parameter |
|----------------------------------------------|-----------------------------------------|-----------|
|                                              |                                         | (8)       |
|                                              | 404060001                               | ,000      |
|                                              | 404060002                               | ,000      |
|                                              | 404310003                               | ,000      |
|                                              | 404310004                               | ,000      |
|                                              | 502300005                               | ,000      |
|                                              | 502300006                               | ,000      |
|                                              | 502300007                               | ,000      |
|                                              | 502300214                               | ,000      |
|                                              | 502300411                               | ,000      |
|                                              | 502300415                               | ,000      |
|                                              | 502300416                               | ,000      |
|                                              | 502300811                               | ,000      |
|                                              | 502300913                               | ,000      |
| weekday veckodag                             | 1 måndag                                |           |
|                                              | 2 tisdag                                |           |
|                                              | 3 onsdag                                |           |
|                                              | 4 torsdag                               |           |
|                                              | 5 fredag                                |           |
|                                              | 6 lördag                                |           |
|                                              | 7 söndag                                |           |
| season säsong/period                         | 1 januari-mars                          |           |
|                                              | 2 april-maj                             |           |
|                                              | 3 juni-augusti                          |           |
|                                              | 4 september-oktober                     |           |
|                                              | 5 november-december                     |           |
| bv3 belasnting vs paoncil dubbla intervallet | 1 medelbelastning                       |           |
|                                              | 2 underbelastning                       |           |
|                                              | 3 överbelastning                        |           |
| holiday större helg                          | 1 ingen större helg                     |           |
|                                              | 2 större helg (påsk/midsommar/julonyår) |           |

## Categorical Variables Codings

|                                              |                                         | Parameter |
|----------------------------------------------|-----------------------------------------|-----------|
|                                              |                                         | (9)       |
|                                              | 404060001                               | ,000      |
|                                              | 404060002                               | ,000      |
|                                              | 404310003                               | ,000      |
|                                              | 404310004                               | ,000      |
|                                              | 502300005                               | ,000      |
|                                              | 502300006                               | ,000      |
|                                              | 502300007                               | ,000      |
|                                              | 502300214                               | ,000      |
|                                              | 502300411                               | ,000      |
|                                              | 502300415                               | ,000      |
|                                              | 502300416                               | ,000      |
|                                              | 502300811                               | ,000      |
|                                              | 502300913                               | ,000      |
| weekday veckodag                             | 1 måndag                                |           |
|                                              | 2 tisdag                                |           |
|                                              | 3 onsdag                                |           |
|                                              | 4 torsdag                               |           |
|                                              | 5 fredag                                |           |
|                                              | 6 lördag                                |           |
|                                              | 7 söndag                                |           |
| season säsong/period                         | 1 januari-mars                          |           |
|                                              | 2 april-maj                             |           |
|                                              | 3 juni-augusti                          |           |
|                                              | 4 september-oktober                     |           |
|                                              | 5 november-december                     |           |
| bv3 belastning vs paoncil dubbla intervallet | 1 medelbelastning                       |           |
|                                              | 2 underbelastning                       |           |
|                                              | 3 överbelastning                        |           |
| holiday större helg                          | 1 ingen större helg                     |           |
|                                              | 2 större helg (påsk/midsommar/julonyår) |           |

## Categorical Variables Codings

|                                              |                                         | Parameter |
|----------------------------------------------|-----------------------------------------|-----------|
|                                              |                                         | (10)      |
|                                              | 404060001                               | ,000      |
|                                              | 404060002                               | ,000      |
|                                              | 404310003                               | ,000      |
|                                              | 404310004                               | ,000      |
|                                              | 502300005                               | ,000      |
|                                              | 502300006                               | ,000      |
|                                              | 502300007                               | ,000      |
|                                              | 502300214                               | ,000      |
|                                              | 502300411                               | ,000      |
|                                              | 502300415                               | ,000      |
|                                              | 502300416                               | ,000      |
|                                              | 502300811                               | ,000      |
|                                              | 502300913                               | ,000      |
| weekday veckodag                             | 1 måndag                                |           |
|                                              | 2 tisdag                                |           |
|                                              | 3 onsdag                                |           |
|                                              | 4 torsdag                               |           |
|                                              | 5 fredag                                |           |
|                                              | 6 lördag                                |           |
|                                              | 7 söndag                                |           |
| season säsong/period                         | 1 januari-mars                          |           |
|                                              | 2 april-maj                             |           |
|                                              | 3 juni-augusti                          |           |
|                                              | 4 september-oktober                     |           |
|                                              | 5 november-december                     |           |
| bv3 belastning vs paoncil dubbla intervallet | 1 medelbelastning                       |           |
|                                              | 2 underbelastning                       |           |
|                                              | 3 överbelastning                        |           |
| holiday större helg                          | 1 ingen större helg                     |           |
|                                              | 2 större helg (påsk/midsommar/julonyår) |           |

## Categorical Variables Codings

|                                              |                                         | Parameter |
|----------------------------------------------|-----------------------------------------|-----------|
|                                              |                                         | (11)      |
|                                              | 404060001                               | ,000      |
|                                              | 404060002                               | ,000      |
|                                              | 404310003                               | ,000      |
|                                              | 404310004                               | ,000      |
|                                              | 502300005                               | ,000      |
|                                              | 502300006                               | ,000      |
|                                              | 502300007                               | ,000      |
|                                              | 502300214                               | ,000      |
|                                              | 502300411                               | ,000      |
|                                              | 502300415                               | ,000      |
|                                              | 502300416                               | ,000      |
|                                              | 502300811                               | ,000      |
|                                              | 502300913                               | ,000      |
| weekday veckodag                             | 1 måndag                                |           |
|                                              | 2 tisdag                                |           |
|                                              | 3 onsdag                                |           |
|                                              | 4 torsdag                               |           |
|                                              | 5 fredag                                |           |
|                                              | 6 lördag                                |           |
|                                              | 7 söndag                                |           |
| season säsong/period                         | 1 januari-mars                          |           |
|                                              | 2 april-maj                             |           |
|                                              | 3 juni-augusti                          |           |
|                                              | 4 september-oktober                     |           |
|                                              | 5 november-december                     |           |
| bv3 belastning vs paoncil dubbla intervallet | 1 medelbelastning                       |           |
|                                              | 2 underbelastning                       |           |
|                                              | 3 överbelastning                        |           |
| holiday större helg                          | 1 ingen större helg                     |           |
|                                              | 2 större helg (påsk/midsommar/julonyår) |           |

## Categorical Variables Codings

|                                              |                                         | Parameter |
|----------------------------------------------|-----------------------------------------|-----------|
|                                              |                                         | (12)      |
|                                              | 404060001                               | ,000      |
|                                              | 404060002                               | ,000      |
|                                              | 404310003                               | ,000      |
|                                              | 404310004                               | ,000      |
|                                              | 502300005                               | ,000      |
|                                              | 502300006                               | ,000      |
|                                              | 502300007                               | ,000      |
|                                              | 502300214                               | ,000      |
|                                              | 502300411                               | ,000      |
|                                              | 502300415                               | ,000      |
|                                              | 502300416                               | ,000      |
|                                              | 502300811                               | ,000      |
|                                              | 502300913                               | ,000      |
| weekday veckodag                             | 1 måndag                                |           |
|                                              | 2 tisdag                                |           |
|                                              | 3 onsdag                                |           |
|                                              | 4 torsdag                               |           |
|                                              | 5 fredag                                |           |
|                                              | 6 lördag                                |           |
|                                              | 7 söndag                                |           |
| season säsong/period                         | 1 januari-mars                          |           |
|                                              | 2 april-maj                             |           |
|                                              | 3 juni-augusti                          |           |
|                                              | 4 september-oktober                     |           |
|                                              | 5 november-december                     |           |
| bv3 belastning vs paoncil dubbla intervallet | 1 medelbelastning                       |           |
|                                              | 2 underbelastning                       |           |
|                                              | 3 överbelastning                        |           |
| holiday större helg                          | 1 ingen större helg                     |           |
|                                              | 2 större helg (påsk/midsommar/julonyår) |           |

## Categorical Variables Codings

|                                              |                                         | Parameter |
|----------------------------------------------|-----------------------------------------|-----------|
|                                              |                                         | (13)      |
|                                              | 404060001                               | ,000      |
|                                              | 404060002                               | ,000      |
|                                              | 404310003                               | ,000      |
|                                              | 404310004                               | ,000      |
|                                              | 502300005                               | ,000      |
|                                              | 502300006                               | ,000      |
|                                              | 502300007                               | ,000      |
|                                              | 502300214                               | ,000      |
|                                              | 502300411                               | ,000      |
|                                              | 502300415                               | ,000      |
|                                              | 502300416                               | ,000      |
|                                              | 502300811                               | ,000      |
|                                              | 502300913                               | ,000      |
| weekday veckodag                             | 1 måndag                                |           |
|                                              | 2 tisdag                                |           |
|                                              | 3 onsdag                                |           |
|                                              | 4 torsdag                               |           |
|                                              | 5 fredag                                |           |
|                                              | 6 lördag                                |           |
|                                              | 7 söndag                                |           |
| season säsong/period                         | 1 januari-mars                          |           |
|                                              | 2 april-maj                             |           |
|                                              | 3 juni-augusti                          |           |
|                                              | 4 september-oktober                     |           |
|                                              | 5 november-december                     |           |
| bv3 belastning vs paoncil dubbla intervallet | 1 medelbelastning                       |           |
|                                              | 2 underbelastning                       |           |
|                                              | 3 överbelastning                        |           |
| holiday större helg                          | 1 ingen större helg                     |           |
|                                              | 2 större helg (påsk/midsommar/julonyår) |           |



## Categorical Variables Codings

|                                              |                                         | Parameter |
|----------------------------------------------|-----------------------------------------|-----------|
|                                              |                                         | (14)      |
|                                              | 404060001                               | ,000      |
|                                              | 404060002                               | ,000      |
|                                              | 404310003                               | ,000      |
|                                              | 404310004                               | ,000      |
|                                              | 502300005                               | ,000      |
|                                              | 502300006                               | ,000      |
|                                              | 502300007                               | ,000      |
|                                              | 502300214                               | ,000      |
|                                              | 502300411                               | ,000      |
|                                              | 502300415                               | ,000      |
|                                              | 502300416                               | ,000      |
|                                              | 502300811                               | ,000      |
|                                              | 502300913                               | ,000      |
| weekday veckodag                             | 1 måndag                                |           |
|                                              | 2 tisdag                                |           |
|                                              | 3 onsdag                                |           |
|                                              | 4 torsdag                               |           |
|                                              | 5 fredag                                |           |
|                                              | 6 lördag                                |           |
|                                              | 7 söndag                                |           |
| season säsong/period                         | 1 januari-mars                          |           |
|                                              | 2 april-maj                             |           |
|                                              | 3 juni-augusti                          |           |
|                                              | 4 september-oktober                     |           |
|                                              | 5 november-december                     |           |
| bv3 belastning vs paoncil dubbla intervallet | 1 medelbelastning                       |           |
|                                              | 2 underbelastning                       |           |
|                                              | 3 överbelastning                        |           |
| holiday större helg                          | 1 ingen större helg                     |           |
|                                              | 2 större helg (påsk/midsommar/julonyår) |           |

## Categorical Variables Codings

|                                              |                                         | Parameter |
|----------------------------------------------|-----------------------------------------|-----------|
|                                              |                                         | (15)      |
|                                              | 404060001                               | ,000      |
|                                              | 404060002                               | ,000      |
|                                              | 404310003                               | ,000      |
|                                              | 404310004                               | ,000      |
|                                              | 502300005                               | ,000      |
|                                              | 502300006                               | ,000      |
|                                              | 502300007                               | ,000      |
|                                              | 502300214                               | ,000      |
|                                              | 502300411                               | ,000      |
|                                              | 502300415                               | ,000      |
|                                              | 502300416                               | ,000      |
|                                              | 502300811                               | ,000      |
|                                              | 502300913                               | ,000      |
| weekday veckodag                             | 1 måndag                                |           |
|                                              | 2 tisdag                                |           |
|                                              | 3 onsdag                                |           |
|                                              | 4 torsdag                               |           |
|                                              | 5 fredag                                |           |
|                                              | 6 lördag                                |           |
|                                              | 7 söndag                                |           |
| season säsong/period                         | 1 januari-mars                          |           |
|                                              | 2 april-maj                             |           |
|                                              | 3 juni-augusti                          |           |
|                                              | 4 september-oktober                     |           |
|                                              | 5 november-december                     |           |
| bv3 belasnting vs paoncil dubbla intervallet | 1 medelbelastning                       |           |
|                                              | 2 underbelastning                       |           |
|                                              | 3 överbelastning                        |           |
| holiday större helg                          | 1 ingen större helg                     |           |
|                                              | 2 större helg (påsk/midsommar/julonyår) |           |

## Categorical Variables Codings

|                                              |                                         | Parameter |
|----------------------------------------------|-----------------------------------------|-----------|
|                                              |                                         | (16)      |
|                                              | 404060001                               | ,000      |
|                                              | 404060002                               | ,000      |
|                                              | 404310003                               | ,000      |
|                                              | 404310004                               | ,000      |
|                                              | 502300005                               | ,000      |
|                                              | 502300006                               | ,000      |
|                                              | 502300007                               | ,000      |
|                                              | 502300214                               | ,000      |
|                                              | 502300411                               | ,000      |
|                                              | 502300415                               | ,000      |
|                                              | 502300416                               | ,000      |
|                                              | 502300811                               | ,000      |
|                                              | 502300913                               | ,000      |
| weekday veckodag                             | 1 måndag                                |           |
|                                              | 2 tisdag                                |           |
|                                              | 3 onsdag                                |           |
|                                              | 4 torsdag                               |           |
|                                              | 5 fredag                                |           |
|                                              | 6 lördag                                |           |
|                                              | 7 söndag                                |           |
| season säsong/period                         | 1 januari-mars                          |           |
|                                              | 2 april-maj                             |           |
|                                              | 3 juni-augusti                          |           |
|                                              | 4 september-oktober                     |           |
|                                              | 5 november-december                     |           |
| bv3 belasnting vs paoncil dubbla intervallet | 1 medelbelastning                       |           |
|                                              | 2 underbelastning                       |           |
|                                              | 3 överbelastning                        |           |
| holiday större helg                          | 1 ingen större helg                     |           |
|                                              | 2 större helg (påsk/midsommar/julonyår) |           |

## Categorical Variables Codings

|                                              |                                         | Parameter |
|----------------------------------------------|-----------------------------------------|-----------|
|                                              |                                         | (17)      |
|                                              | 404060001                               | ,000      |
|                                              | 404060002                               | ,000      |
|                                              | 404310003                               | ,000      |
|                                              | 404310004                               | ,000      |
|                                              | 502300005                               | ,000      |
|                                              | 502300006                               | ,000      |
|                                              | 502300007                               | ,000      |
|                                              | 502300214                               | ,000      |
|                                              | 502300411                               | ,000      |
|                                              | 502300415                               | ,000      |
|                                              | 502300416                               | ,000      |
|                                              | 502300811                               | ,000      |
|                                              | 502300913                               | ,000      |
| weekday veckodag                             | 1 måndag                                |           |
|                                              | 2 tisdag                                |           |
|                                              | 3 onsdag                                |           |
|                                              | 4 torsdag                               |           |
|                                              | 5 fredag                                |           |
|                                              | 6 lördag                                |           |
|                                              | 7 söndag                                |           |
| season säsong/period                         | 1 januari-mars                          |           |
|                                              | 2 april-maj                             |           |
|                                              | 3 juni-augusti                          |           |
|                                              | 4 september-oktober                     |           |
|                                              | 5 november-december                     |           |
| bv3 belasnting vs paoncil dubbla intervallet | 1 medelbelastning                       |           |
|                                              | 2 underbelastning                       |           |
|                                              | 3 överbelastning                        |           |
| holiday större helg                          | 1 ingen större helg                     |           |
|                                              | 2 större helg (påsk/midsommar/julonyår) |           |

## Categorical Variables Codings

|                                              |                                         | Parameter |
|----------------------------------------------|-----------------------------------------|-----------|
|                                              |                                         | (18)      |
|                                              | 404060001                               | ,000      |
|                                              | 404060002                               | ,000      |
|                                              | 404310003                               | ,000      |
|                                              | 404310004                               | ,000      |
|                                              | 502300005                               | ,000      |
|                                              | 502300006                               | ,000      |
|                                              | 502300007                               | ,000      |
|                                              | 502300214                               | ,000      |
|                                              | 502300411                               | ,000      |
|                                              | 502300415                               | ,000      |
|                                              | 502300416                               | ,000      |
|                                              | 502300811                               | ,000      |
|                                              | 502300913                               | ,000      |
| weekday veckodag                             | 1 måndag                                |           |
|                                              | 2 tisdag                                |           |
|                                              | 3 onsdag                                |           |
|                                              | 4 torsdag                               |           |
|                                              | 5 fredag                                |           |
|                                              | 6 lördag                                |           |
|                                              | 7 söndag                                |           |
| season säsong/period                         | 1 januari-mars                          |           |
|                                              | 2 april-maj                             |           |
|                                              | 3 juni-augusti                          |           |
|                                              | 4 september-oktober                     |           |
|                                              | 5 november-december                     |           |
| bv3 belasnting vs paoncil dubbla intervallet | 1 medelbelastning                       |           |
|                                              | 2 underbelastning                       |           |
|                                              | 3 överbelastning                        |           |
| holiday större helg                          | 1 ingen större helg                     |           |
|                                              | 2 större helg (påsk/midsommar/julonyår) |           |

## Categorical Variables Codings

|                                              |                                         | Parameter |
|----------------------------------------------|-----------------------------------------|-----------|
|                                              |                                         | (19)      |
|                                              | 404060001                               | ,000      |
|                                              | 404060002                               | ,000      |
|                                              | 404310003                               | ,000      |
|                                              | 404310004                               | ,000      |
|                                              | 502300005                               | ,000      |
|                                              | 502300006                               | ,000      |
|                                              | 502300007                               | ,000      |
|                                              | 502300214                               | ,000      |
|                                              | 502300411                               | ,000      |
|                                              | 502300415                               | ,000      |
|                                              | 502300416                               | ,000      |
|                                              | 502300811                               | ,000      |
|                                              | 502300913                               | ,000      |
| weekday veckodag                             | 1 måndag                                |           |
|                                              | 2 tisdag                                |           |
|                                              | 3 onsdag                                |           |
|                                              | 4 torsdag                               |           |
|                                              | 5 fredag                                |           |
|                                              | 6 lördag                                |           |
|                                              | 7 söndag                                |           |
| season säsong/period                         | 1 januari-mars                          |           |
|                                              | 2 april-maj                             |           |
|                                              | 3 juni-augusti                          |           |
|                                              | 4 september-oktober                     |           |
|                                              | 5 november-december                     |           |
| bv3 belasnting vs paoncil dubbla intervallet | 1 medelbelastning                       |           |
|                                              | 2 underbelastning                       |           |
|                                              | 3 överbelastning                        |           |
| holiday större helg                          | 1 ingen större helg                     |           |
|                                              | 2 större helg (påsk/midsommar/julonyår) |           |

## Categorical Variables Codings

|                                              |                                         | Parameter |
|----------------------------------------------|-----------------------------------------|-----------|
|                                              |                                         | (20)      |
|                                              | 404060001                               | ,000      |
|                                              | 404060002                               | ,000      |
|                                              | 404310003                               | ,000      |
|                                              | 404310004                               | ,000      |
|                                              | 502300005                               | ,000      |
|                                              | 502300006                               | ,000      |
|                                              | 502300007                               | ,000      |
|                                              | 502300214                               | ,000      |
|                                              | 502300411                               | ,000      |
|                                              | 502300415                               | ,000      |
|                                              | 502300416                               | ,000      |
|                                              | 502300811                               | ,000      |
|                                              | 502300913                               | ,000      |
| weekday veckodag                             | 1 måndag                                |           |
|                                              | 2 tisdag                                |           |
|                                              | 3 onsdag                                |           |
|                                              | 4 torsdag                               |           |
|                                              | 5 fredag                                |           |
|                                              | 6 lördag                                |           |
|                                              | 7 söndag                                |           |
| season säsong/period                         | 1 januari-mars                          |           |
|                                              | 2 april-maj                             |           |
|                                              | 3 juni-augusti                          |           |
|                                              | 4 september-oktober                     |           |
|                                              | 5 november-december                     |           |
| bv3 belastning vs paoncil dubbla intervallet | 1 medelbelastning                       |           |
|                                              | 2 underbelastning                       |           |
|                                              | 3 överbelastning                        |           |
| holiday större helg                          | 1 ingen större helg                     |           |
|                                              | 2 större helg (påsk/midsommar/julonyår) |           |

## Categorical Variables Codings

|                                              |                                         | Parameter |
|----------------------------------------------|-----------------------------------------|-----------|
|                                              |                                         | (21)      |
|                                              | 404060001                               | ,000      |
|                                              | 404060002                               | ,000      |
|                                              | 404310003                               | ,000      |
|                                              | 404310004                               | ,000      |
|                                              | 502300005                               | ,000      |
|                                              | 502300006                               | ,000      |
|                                              | 502300007                               | ,000      |
|                                              | 502300214                               | ,000      |
|                                              | 502300411                               | ,000      |
|                                              | 502300415                               | ,000      |
|                                              | 502300416                               | ,000      |
|                                              | 502300811                               | ,000      |
|                                              | 502300913                               | ,000      |
| weekday veckodag                             | 1 måndag                                |           |
|                                              | 2 tisdag                                |           |
|                                              | 3 onsdag                                |           |
|                                              | 4 torsdag                               |           |
|                                              | 5 fredag                                |           |
|                                              | 6 lördag                                |           |
|                                              | 7 söndag                                |           |
| season säsong/period                         | 1 januari-mars                          |           |
|                                              | 2 april-maj                             |           |
|                                              | 3 juni-augusti                          |           |
|                                              | 4 september-oktober                     |           |
|                                              | 5 november-december                     |           |
| bv3 belastning vs paoncil dubbla intervallet | 1 medelbelastning                       |           |
|                                              | 2 underbelastning                       |           |
|                                              | 3 överbelastning                        |           |
| holiday större helg                          | 1 ingen större helg                     |           |
|                                              | 2 större helg (påsk/midsommar/julonyår) |           |



## Categorical Variables Codings

|                                              |                                         | Parameter |
|----------------------------------------------|-----------------------------------------|-----------|
|                                              |                                         | (22)      |
|                                              | 404060001                               | ,000      |
|                                              | 404060002                               | ,000      |
|                                              | 404310003                               | ,000      |
|                                              | 404310004                               | ,000      |
|                                              | 502300005                               | ,000      |
|                                              | 502300006                               | ,000      |
|                                              | 502300007                               | ,000      |
|                                              | 502300214                               | ,000      |
|                                              | 502300411                               | ,000      |
|                                              | 502300415                               | ,000      |
|                                              | 502300416                               | ,000      |
|                                              | 502300811                               | ,000      |
|                                              | 502300913                               | ,000      |
| weekday veckodag                             | 1 måndag                                |           |
|                                              | 2 tisdag                                |           |
|                                              | 3 onsdag                                |           |
|                                              | 4 torsdag                               |           |
|                                              | 5 fredag                                |           |
|                                              | 6 lördag                                |           |
|                                              | 7 söndag                                |           |
| season säsong/period                         | 1 januari-mars                          |           |
|                                              | 2 april-maj                             |           |
|                                              | 3 juni-augusti                          |           |
|                                              | 4 september-oktober                     |           |
|                                              | 5 november-december                     |           |
| bv3 belasnting vs paoncil dubbla intervallet | 1 medelbelastning                       |           |
|                                              | 2 underbelastning                       |           |
|                                              | 3 överbelastning                        |           |
| holiday större helg                          | 1 ingen större helg                     |           |
|                                              | 2 större helg (påsk/midsommar/julonyår) |           |

## Categorical Variables Codings

|                                              |                                         | Parameter |
|----------------------------------------------|-----------------------------------------|-----------|
|                                              |                                         | (23)      |
|                                              | 404060001                               | 1,000     |
|                                              | 404060002                               | ,000      |
|                                              | 404310003                               | ,000      |
|                                              | 404310004                               | ,000      |
|                                              | 502300005                               | ,000      |
|                                              | 502300006                               | ,000      |
|                                              | 502300007                               | ,000      |
|                                              | 502300214                               | ,000      |
|                                              | 502300411                               | ,000      |
|                                              | 502300415                               | ,000      |
|                                              | 502300416                               | ,000      |
|                                              | 502300811                               | ,000      |
|                                              | 502300913                               | ,000      |
| weekday veckodag                             | 1 måndag                                |           |
|                                              | 2 tisdag                                |           |
|                                              | 3 onsdag                                |           |
|                                              | 4 torsdag                               |           |
|                                              | 5 fredag                                |           |
|                                              | 6 lördag                                |           |
|                                              | 7 söndag                                |           |
| season säsong/period                         | 1 januari-mars                          |           |
|                                              | 2 april-maj                             |           |
|                                              | 3 juni-augusti                          |           |
|                                              | 4 september-oktober                     |           |
|                                              | 5 november-december                     |           |
| bv3 belastning vs paoncil dubbla intervallet | 1 medelbelastning                       |           |
|                                              | 2 underbelastning                       |           |
|                                              | 3 överbelastning                        |           |
| holiday större helg                          | 1 ingen större helg                     |           |
|                                              | 2 större helg (påsk/midsommar/julonyår) |           |

## Categorical Variables Codings

|                                              |                                         | Parameter |
|----------------------------------------------|-----------------------------------------|-----------|
|                                              |                                         | (24)      |
|                                              | 404060001                               | ,000      |
|                                              | 404060002                               | 1,000     |
|                                              | 404310003                               | ,000      |
|                                              | 404310004                               | ,000      |
|                                              | 502300005                               | ,000      |
|                                              | 502300006                               | ,000      |
|                                              | 502300007                               | ,000      |
|                                              | 502300214                               | ,000      |
|                                              | 502300411                               | ,000      |
|                                              | 502300415                               | ,000      |
|                                              | 502300416                               | ,000      |
|                                              | 502300811                               | ,000      |
|                                              | 502300913                               | ,000      |
| weekday veckodag                             | 1 måndag                                |           |
|                                              | 2 tisdag                                |           |
|                                              | 3 onsdag                                |           |
|                                              | 4 torsdag                               |           |
|                                              | 5 fredag                                |           |
|                                              | 6 lördag                                |           |
|                                              | 7 söndag                                |           |
| season säsong/period                         | 1 januari-mars                          |           |
|                                              | 2 april-maj                             |           |
|                                              | 3 juni-augusti                          |           |
|                                              | 4 september-oktober                     |           |
|                                              | 5 november-december                     |           |
| bv3 belasnting vs paoncil dubbla intervallet | 1 medelbelastning                       |           |
|                                              | 2 underbelastning                       |           |
|                                              | 3 överbelastning                        |           |
| holiday större helg                          | 1 ingen större helg                     |           |
|                                              | 2 större helg (påsk/midsommar/julonyår) |           |

## Categorical Variables Codings

|                                              |                                         | Parameter |
|----------------------------------------------|-----------------------------------------|-----------|
|                                              |                                         | (25)      |
|                                              | 404060001                               | ,000      |
|                                              | 404060002                               | ,000      |
|                                              | 404310003                               | 1,000     |
|                                              | 404310004                               | ,000      |
|                                              | 502300005                               | ,000      |
|                                              | 502300006                               | ,000      |
|                                              | 502300007                               | ,000      |
|                                              | 502300214                               | ,000      |
|                                              | 502300411                               | ,000      |
|                                              | 502300415                               | ,000      |
|                                              | 502300416                               | ,000      |
|                                              | 502300811                               | ,000      |
|                                              | 502300913                               | ,000      |
| weekday veckodag                             | 1 måndag                                |           |
|                                              | 2 tisdag                                |           |
|                                              | 3 onsdag                                |           |
|                                              | 4 torsdag                               |           |
|                                              | 5 fredag                                |           |
|                                              | 6 lördag                                |           |
|                                              | 7 söndag                                |           |
| season säsong/period                         | 1 januari-mars                          |           |
|                                              | 2 april-maj                             |           |
|                                              | 3 juni-augusti                          |           |
|                                              | 4 september-oktober                     |           |
|                                              | 5 november-december                     |           |
| bv3 belastning vs paoncil dubbla intervallet | 1 medelbelastning                       |           |
|                                              | 2 underbelastning                       |           |
|                                              | 3 överbelastning                        |           |
| holiday större helg                          | 1 ingen större helg                     |           |
|                                              | 2 större helg (påsk/midsommar/julonyår) |           |

## Categorical Variables Codings

|                                              |                                         | Parameter |
|----------------------------------------------|-----------------------------------------|-----------|
|                                              |                                         | (26)      |
|                                              | 404060001                               | ,000      |
|                                              | 404060002                               | ,000      |
|                                              | 404310003                               | ,000      |
|                                              | 404310004                               | 1,000     |
|                                              | 502300005                               | ,000      |
|                                              | 502300006                               | ,000      |
|                                              | 502300007                               | ,000      |
|                                              | 502300214                               | ,000      |
|                                              | 502300411                               | ,000      |
|                                              | 502300415                               | ,000      |
|                                              | 502300416                               | ,000      |
|                                              | 502300811                               | ,000      |
|                                              | 502300913                               | ,000      |
| weekday veckodag                             | 1 måndag                                |           |
|                                              | 2 tisdag                                |           |
|                                              | 3 onsdag                                |           |
|                                              | 4 torsdag                               |           |
|                                              | 5 fredag                                |           |
|                                              | 6 lördag                                |           |
|                                              | 7 söndag                                |           |
| season säsong/period                         | 1 januari-mars                          |           |
|                                              | 2 april-maj                             |           |
|                                              | 3 juni-augusti                          |           |
|                                              | 4 september-oktober                     |           |
|                                              | 5 november-december                     |           |
| bv3 belastning vs paoncil dubbla intervallet | 1 medelbelastning                       |           |
|                                              | 2 underbelastning                       |           |
|                                              | 3 överbelastning                        |           |
| holiday större helg                          | 1 ingen större helg                     |           |
|                                              | 2 större helg (påsk/midsommar/julonyår) |           |

## Categorical Variables Codings

|                                              |                                         | Parameter |
|----------------------------------------------|-----------------------------------------|-----------|
|                                              |                                         | (27)      |
|                                              | 404060001                               | ,000      |
|                                              | 404060002                               | ,000      |
|                                              | 404310003                               | ,000      |
|                                              | 404310004                               | ,000      |
|                                              | 502300005                               | 1,000     |
|                                              | 502300006                               | ,000      |
|                                              | 502300007                               | ,000      |
|                                              | 502300214                               | ,000      |
|                                              | 502300411                               | ,000      |
|                                              | 502300415                               | ,000      |
|                                              | 502300416                               | ,000      |
|                                              | 502300811                               | ,000      |
|                                              | 502300913                               | ,000      |
| weekday veckodag                             | 1 måndag                                |           |
|                                              | 2 tisdag                                |           |
|                                              | 3 onsdag                                |           |
|                                              | 4 torsdag                               |           |
|                                              | 5 fredag                                |           |
|                                              | 6 lördag                                |           |
|                                              | 7 söndag                                |           |
| season säsong/period                         | 1 januari-mars                          |           |
|                                              | 2 april-maj                             |           |
|                                              | 3 juni-augusti                          |           |
|                                              | 4 september-oktober                     |           |
|                                              | 5 november-december                     |           |
| bv3 belastning vs paoncil dubbla intervallet | 1 medelbelastning                       |           |
|                                              | 2 underbelastning                       |           |
|                                              | 3 överbelastning                        |           |
| holiday större helg                          | 1 ingen större helg                     |           |
|                                              | 2 större helg (påsk/midsommar/julonyår) |           |

## Categorical Variables Codings

|                                              |                                         | Parameter |
|----------------------------------------------|-----------------------------------------|-----------|
|                                              |                                         | (28)      |
|                                              | 404060001                               | ,000      |
|                                              | 404060002                               | ,000      |
|                                              | 404310003                               | ,000      |
|                                              | 404310004                               | ,000      |
|                                              | 502300005                               | ,000      |
|                                              | 502300006                               | 1,000     |
|                                              | 502300007                               | ,000      |
|                                              | 502300214                               | ,000      |
|                                              | 502300411                               | ,000      |
|                                              | 502300415                               | ,000      |
|                                              | 502300416                               | ,000      |
|                                              | 502300811                               | ,000      |
|                                              | 502300913                               | ,000      |
| weekday veckodag                             | 1 måndag                                |           |
|                                              | 2 tisdag                                |           |
|                                              | 3 onsdag                                |           |
|                                              | 4 torsdag                               |           |
|                                              | 5 fredag                                |           |
|                                              | 6 lördag                                |           |
|                                              | 7 söndag                                |           |
| season säsong/period                         | 1 januari-mars                          |           |
|                                              | 2 april-maj                             |           |
|                                              | 3 juni-augusti                          |           |
|                                              | 4 september-oktober                     |           |
|                                              | 5 november-december                     |           |
| bv3 belastning vs paoncil dubbla intervallet | 1 medelbelastning                       |           |
|                                              | 2 underbelastning                       |           |
|                                              | 3 överbelastning                        |           |
| holiday större helg                          | 1 ingen större helg                     |           |
|                                              | 2 större helg (påsk/midsommar/julonyår) |           |

## Categorical Variables Codings

|                                              |                                         | Parameter |
|----------------------------------------------|-----------------------------------------|-----------|
|                                              |                                         | (29)      |
|                                              | 404060001                               | ,000      |
|                                              | 404060002                               | ,000      |
|                                              | 404310003                               | ,000      |
|                                              | 404310004                               | ,000      |
|                                              | 502300005                               | ,000      |
|                                              | 502300006                               | ,000      |
|                                              | 502300007                               | 1,000     |
|                                              | 502300214                               | ,000      |
|                                              | 502300411                               | ,000      |
|                                              | 502300415                               | ,000      |
|                                              | 502300416                               | ,000      |
|                                              | 502300811                               | ,000      |
|                                              | 502300913                               | ,000      |
| weekday veckodag                             | 1 måndag                                |           |
|                                              | 2 tisdag                                |           |
|                                              | 3 onsdag                                |           |
|                                              | 4 torsdag                               |           |
|                                              | 5 fredag                                |           |
|                                              | 6 lördag                                |           |
|                                              | 7 söndag                                |           |
| season säsong/period                         | 1 januari-mars                          |           |
|                                              | 2 april-maj                             |           |
|                                              | 3 juni-augusti                          |           |
|                                              | 4 september-oktober                     |           |
|                                              | 5 november-december                     |           |
| bv3 belasnting vs paoncil dubbla intervallet | 1 medelbelastning                       |           |
|                                              | 2 underbelastning                       |           |
|                                              | 3 överbelastning                        |           |
| holiday större helg                          | 1 ingen större helg                     |           |
|                                              | 2 större helg (påsk/midsommar/julonyår) |           |



## Categorical Variables Codings

|                                              |                                         | Parameter |
|----------------------------------------------|-----------------------------------------|-----------|
|                                              |                                         | (30)      |
|                                              | 404060001                               | ,000      |
|                                              | 404060002                               | ,000      |
|                                              | 404310003                               | ,000      |
|                                              | 404310004                               | ,000      |
|                                              | 502300005                               | ,000      |
|                                              | 502300006                               | ,000      |
|                                              | 502300007                               | ,000      |
|                                              | 502300214                               | 1,000     |
|                                              | 502300411                               | ,000      |
|                                              | 502300415                               | ,000      |
|                                              | 502300416                               | ,000      |
|                                              | 502300811                               | ,000      |
|                                              | 502300913                               | ,000      |
| weekday veckodag                             | 1 måndag                                |           |
|                                              | 2 tisdag                                |           |
|                                              | 3 onsdag                                |           |
|                                              | 4 torsdag                               |           |
|                                              | 5 fredag                                |           |
|                                              | 6 lördag                                |           |
|                                              | 7 söndag                                |           |
| season säsong/period                         | 1 januari-mars                          |           |
|                                              | 2 april-maj                             |           |
|                                              | 3 juni-augusti                          |           |
|                                              | 4 september-oktober                     |           |
|                                              | 5 november-december                     |           |
| bv3 belastning vs paoncil dubbla intervallet | 1 medelbelastning                       |           |
|                                              | 2 underbelastning                       |           |
|                                              | 3 överbelastning                        |           |
| holiday större helg                          | 1 ingen större helg                     |           |
|                                              | 2 större helg (påsk/midsommar/julonyår) |           |

## Categorical Variables Codings

|                                              |                                         | Parameter |
|----------------------------------------------|-----------------------------------------|-----------|
|                                              |                                         | (31)      |
|                                              | 404060001                               | ,000      |
|                                              | 404060002                               | ,000      |
|                                              | 404310003                               | ,000      |
|                                              | 404310004                               | ,000      |
|                                              | 502300005                               | ,000      |
|                                              | 502300006                               | ,000      |
|                                              | 502300007                               | ,000      |
|                                              | 502300214                               | ,000      |
|                                              | 502300411                               | 1,000     |
|                                              | 502300415                               | ,000      |
|                                              | 502300416                               | ,000      |
|                                              | 502300811                               | ,000      |
|                                              | 502300913                               | ,000      |
| weekday veckodag                             | 1 måndag                                |           |
|                                              | 2 tisdag                                |           |
|                                              | 3 onsdag                                |           |
|                                              | 4 torsdag                               |           |
|                                              | 5 fredag                                |           |
|                                              | 6 lördag                                |           |
|                                              | 7 söndag                                |           |
| season säsong/period                         | 1 januari-mars                          |           |
|                                              | 2 april-maj                             |           |
|                                              | 3 juni-augusti                          |           |
|                                              | 4 september-oktober                     |           |
|                                              | 5 november-december                     |           |
| bv3 belasnting vs paoncil dubbla intervallet | 1 medelbelastning                       |           |
|                                              | 2 underbelastning                       |           |
|                                              | 3 överbelastning                        |           |
| holiday större helg                          | 1 ingen större helg                     |           |
|                                              | 2 större helg (påsk/midsommar/julonyår) |           |

## Categorical Variables Codings

|                                              |                                         | Parameter |
|----------------------------------------------|-----------------------------------------|-----------|
|                                              |                                         | (32)      |
|                                              | 404060001                               | ,000      |
|                                              | 404060002                               | ,000      |
|                                              | 404310003                               | ,000      |
|                                              | 404310004                               | ,000      |
|                                              | 502300005                               | ,000      |
|                                              | 502300006                               | ,000      |
|                                              | 502300007                               | ,000      |
|                                              | 502300214                               | ,000      |
|                                              | 502300411                               | ,000      |
|                                              | 502300415                               | 1,000     |
|                                              | 502300416                               | ,000      |
|                                              | 502300811                               | ,000      |
|                                              | 502300913                               | ,000      |
| weekday veckodag                             | 1 måndag                                |           |
|                                              | 2 tisdag                                |           |
|                                              | 3 onsdag                                |           |
|                                              | 4 torsdag                               |           |
|                                              | 5 fredag                                |           |
|                                              | 6 lördag                                |           |
|                                              | 7 söndag                                |           |
| season säsong/period                         | 1 januari-mars                          |           |
|                                              | 2 april-maj                             |           |
|                                              | 3 juni-augusti                          |           |
|                                              | 4 september-oktober                     |           |
|                                              | 5 november-december                     |           |
| bv3 belasnting vs paoncil dubbla intervallet | 1 medelbelastning                       |           |
|                                              | 2 underbelastning                       |           |
|                                              | 3 överbelastning                        |           |
| holiday större helg                          | 1 ingen större helg                     |           |
|                                              | 2 större helg (påsk/midsommar/julonyår) |           |

## Categorical Variables Codings

|                                              |                                         | Parameter |
|----------------------------------------------|-----------------------------------------|-----------|
|                                              |                                         | (33)      |
|                                              | 404060001                               | ,000      |
|                                              | 404060002                               | ,000      |
|                                              | 404310003                               | ,000      |
|                                              | 404310004                               | ,000      |
|                                              | 502300005                               | ,000      |
|                                              | 502300006                               | ,000      |
|                                              | 502300007                               | ,000      |
|                                              | 502300214                               | ,000      |
|                                              | 502300411                               | ,000      |
|                                              | 502300415                               | ,000      |
|                                              | 502300416                               | 1,000     |
|                                              | 502300811                               | ,000      |
|                                              | 502300913                               | ,000      |
| weekday veckodag                             | 1 måndag                                |           |
|                                              | 2 tisdag                                |           |
|                                              | 3 onsdag                                |           |
|                                              | 4 torsdag                               |           |
|                                              | 5 fredag                                |           |
|                                              | 6 lördag                                |           |
|                                              | 7 söndag                                |           |
| season säsong/period                         | 1 januari-mars                          |           |
|                                              | 2 april-maj                             |           |
|                                              | 3 juni-augusti                          |           |
|                                              | 4 september-oktober                     |           |
|                                              | 5 november-december                     |           |
| bv3 belasnting vs paoncil dubbla intervallet | 1 medelbelastning                       |           |
|                                              | 2 underbelastning                       |           |
|                                              | 3 överbelastning                        |           |
| holiday större helg                          | 1 ingen större helg                     |           |
|                                              | 2 större helg (påsk/midsommar/julonyår) |           |

## Categorical Variables Codings

|                                              |                                         | Parameter |
|----------------------------------------------|-----------------------------------------|-----------|
|                                              |                                         | (34)      |
|                                              | 404060001                               | ,000      |
|                                              | 404060002                               | ,000      |
|                                              | 404310003                               | ,000      |
|                                              | 404310004                               | ,000      |
|                                              | 502300005                               | ,000      |
|                                              | 502300006                               | ,000      |
|                                              | 502300007                               | ,000      |
|                                              | 502300214                               | ,000      |
|                                              | 502300411                               | ,000      |
|                                              | 502300415                               | ,000      |
|                                              | 502300416                               | ,000      |
|                                              | 502300811                               | 1,000     |
|                                              | 502300913                               | ,000      |
| weekday veckodag                             | 1 måndag                                |           |
|                                              | 2 tisdag                                |           |
|                                              | 3 onsdag                                |           |
|                                              | 4 torsdag                               |           |
|                                              | 5 fredag                                |           |
|                                              | 6 lördag                                |           |
|                                              | 7 söndag                                |           |
| season säsong/period                         | 1 januari-mars                          |           |
|                                              | 2 april-maj                             |           |
|                                              | 3 juni-augusti                          |           |
|                                              | 4 september-oktober                     |           |
|                                              | 5 november-december                     |           |
| bv3 belastning vs paoncil dubbla intervallet | 1 medelbelastning                       |           |
|                                              | 2 underbelastning                       |           |
|                                              | 3 överbelastning                        |           |
| holiday större helg                          | 1 ingen större helg                     |           |
|                                              | 2 större helg (påsk/midsommar/julonyår) |           |

## Categorical Variables Codings

|                                              |                                         | Paramete... |
|----------------------------------------------|-----------------------------------------|-------------|
|                                              |                                         | (35)        |
|                                              | 404060001                               | ,000        |
|                                              | 404060002                               | ,000        |
|                                              | 404310003                               | ,000        |
|                                              | 404310004                               | ,000        |
|                                              | 502300005                               | ,000        |
|                                              | 502300006                               | ,000        |
|                                              | 502300007                               | ,000        |
|                                              | 502300214                               | ,000        |
|                                              | 502300411                               | ,000        |
|                                              | 502300415                               | ,000        |
|                                              | 502300416                               | ,000        |
|                                              | 502300811                               | ,000        |
|                                              | 502300913                               | 1,000       |
| weekday veckodag                             | 1 måndag                                |             |
|                                              | 2 tisdag                                |             |
|                                              | 3 onsdag                                |             |
|                                              | 4 torsdag                               |             |
|                                              | 5 fredag                                |             |
|                                              | 6 lördag                                |             |
|                                              | 7 söndag                                |             |
| season säsong/period                         | 1 januari-mars                          |             |
|                                              | 2 april-maj                             |             |
|                                              | 3 juni-augusti                          |             |
|                                              | 4 september-oktober                     |             |
|                                              | 5 november-december                     |             |
| bv3 belasnting vs paoncil dubbla intervallet | 1 medelbelastning                       |             |
|                                              | 2 underbelastning                       |             |
|                                              | 3 överbelastning                        |             |
| holiday större helg                          | 1 ingen större helg                     |             |
|                                              | 2 större helg (påsk/midsommar/julonyår) |             |

**Block 0: Beginning Block**

Classification Table<sup>a,b</sup>

| Observed           |                              |                     | Predicted        |                     |
|--------------------|------------------------------|---------------------|------------------|---------------------|
|                    |                              |                     | 0 ingen hændelse | 1 minst en hændelse |
| Step 0             | hand01 hændelse nej eller ja | 0 ingen hændelse    | 11108            | 0                   |
|                    |                              | 1 minst en hændelse | 1367             | 0                   |
| Overall Percentage |                              |                     |                  |                     |

Classification Table<sup>a,b</sup>

| Observed           |                              |                     | Predicted          |
|--------------------|------------------------------|---------------------|--------------------|
|                    |                              |                     | Percentage Correct |
| Step 0             | hand01 hændelse nej eller ja | 0 ingen hændelse    | 100,0              |
|                    |                              | 1 minst en hændelse | ,0                 |
| Overall Percentage |                              |                     | 89,0               |

a. Constant is included in the model.

b. The cut value is ,500

Variables in the Equation

|                 | B      | S.E. | Wald     | df | Sig. | Exp(B) |
|-----------------|--------|------|----------|----|------|--------|
| Step 0 Constant | -2,095 | ,029 | 5342,584 | 1  | ,000 | ,123   |

## Variables not in the Equation

|        |           |            | Score   | df | Sig. |
|--------|-----------|------------|---------|----|------|
| Step 0 | Variables | bv3        | 48,977  | 2  | ,000 |
|        |           | bv3(1)     | 36,781  | 1  | ,000 |
|        |           | bv3(2)     | 19,249  | 1  | ,000 |
|        |           | VASTY2     | 541,214 | 35 | ,000 |
|        |           | VASTY2(1)  | 1,169   | 1  | ,280 |
|        |           | VASTY2(2)  | 87,511  | 1  | ,000 |
|        |           | VASTY2(3)  | 13,995  | 1  | ,000 |
|        |           | VASTY2(4)  | ,464    | 1  | ,496 |
|        |           | VASTY2(5)  | 5,526   | 1  | ,019 |
|        |           | VASTY2(6)  | 19,435  | 1  | ,000 |
|        |           | VASTY2(7)  | 86,074  | 1  | ,000 |
|        |           | VASTY2(8)  | 1,043   | 1  | ,307 |
|        |           | VASTY2(9)  | ,408    | 1  | ,523 |
|        |           | VASTY2(10) | 58,583  | 1  | ,000 |
|        |           | VASTY2(11) | 33,445  | 1  | ,000 |
|        |           | VASTY2(12) | ,029    | 1  | ,865 |
|        |           | VASTY2(13) | 33,445  | 1  | ,000 |
|        |           | VASTY2(14) | 4,163   | 1  | ,041 |
|        |           | VASTY2(15) | ,464    | 1  | ,496 |
|        |           | VASTY2(16) | ,763    | 1  | ,382 |
|        |           | VASTY2(17) | 24,320  | 1  | ,000 |
|        |           | VASTY2(18) | 17,742  | 1  | ,000 |
|        |           | VASTY2(19) | 27,791  | 1  | ,000 |
|        |           | VASTY2(20) | ,015    | 1  | ,902 |
|        |           | VASTY2(21) | 2,890   | 1  | ,089 |
|        |           | VASTY2(22) | ,462    | 1  | ,497 |
|        |           | VASTY2(23) | 15,306  | 1  | ,000 |
|        |           | VASTY2(24) | 12,594  | 1  | ,000 |
|        |           | VASTY2(25) | ,128    | 1  | ,720 |
|        |           | VASTY2(26) | 12,864  | 1  | ,000 |
|        |           | VASTY2(27) | 24,439  | 1  | ,000 |
|        |           | VASTY2(28) | 9,963   | 1  | ,002 |
|        |           | VASTY2(29) | 18,184  | 1  | ,000 |
|        |           | VASTY2(30) | ,486    | 1  | ,486 |
|        |           | VASTY2(31) | 6,400   | 1  | ,011 |
|        |           | VASTY2(32) | 1,626   | 1  | ,202 |
|        |           | VASTY2(33) | 1,336   | 1  | ,248 |
|        |           | VASTY2(34) | 29,489  | 1  | ,000 |
|        |           | VASTY2(35) | 3,668   | 1  | ,055 |
|        |           | weekday    | 20,834  | 6  | ,002 |
|        |           | weekday(1) | ,196    | 1  | ,658 |
|        |           | weekday(2) | ,004    | 1  | ,951 |
|        |           | weekday(3) | 1,386   | 1  | ,239 |



## Variables not in the Equation

|                    | Score   | df | Sig. |
|--------------------|---------|----|------|
| weekday(4)         | ,820    | 1  | ,365 |
| weekday(5)         | 20,097  | 1  | ,000 |
| weekday(6)         | 1,022   | 1  | ,312 |
| holiday(1)         | 4,862   | 1  | ,027 |
| season             | 15,673  | 4  | ,003 |
| season(1)          | ,214    | 1  | ,643 |
| season(2)          | 8,095   | 1  | ,004 |
| season(3)          | 10,213  | 1  | ,001 |
| season(4)          | ,313    | 1  | ,576 |
| Overall Statistics | 602,664 | 48 | ,000 |

## Block 1: Method = Enter

## Omnibus Tests of Model Coefficients

|             | Chi-square | df | Sig. |
|-------------|------------|----|------|
| Step 1 Step | 605,724    | 48 | ,000 |
| Block       | 605,724    | 48 | ,000 |
| Model       | 605,724    | 48 | ,000 |

## Model Summary

| Step | -2 Log likelihood     | Cox & Snell R Square | Nagelkerke R Square |
|------|-----------------------|----------------------|---------------------|
| 1    | 8017,859 <sup>a</sup> | ,047                 | ,095                |

a. Estimation terminated at iteration number 6 because parameter estimates changed by less than ,001.

Classification Table<sup>a</sup>

| Observed           |                              | Predicted           |                     |
|--------------------|------------------------------|---------------------|---------------------|
|                    |                              | 0 ingen hændelse    | 1 minst en hændelse |
| Step 1             | hand01 hændelse nej eller ja | 0 ingen hændelse    | 11108               |
|                    |                              | 1 minst en hændelse | 1367                |
| Overall Percentage |                              |                     |                     |

Classification Table<sup>a</sup>

| Observed           |                              | Predicted          |
|--------------------|------------------------------|--------------------|
|                    |                              | Percentage Correct |
| Step 1             | hand01 hændelse nej eller ja | 100,0              |
|                    |                              | ,0                 |
| Overall Percentage |                              | 89,0               |

a. The cut value is ,500

## Variables in the Equation

|                         | B      | S.E. | Wald    | df | Sig. | Exp(B) |
|-------------------------|--------|------|---------|----|------|--------|
| Step 1 <sup>a</sup> bv3 |        |      | 17,452  | 2  | ,000 |        |
| bv3(1)                  | -,418  | ,119 | 12,448  | 1  | ,000 | ,658   |
| bv3(2)                  | ,156   | ,085 | 3,381   | 1  | ,066 | 1,168  |
| VASTY2                  |        |      | 440,036 | 35 | ,000 |        |
| VASTY2(1)               | ,378   | ,240 | 2,474   | 1  | ,116 | 1,459  |
| VASTY2(2)               | 1,224  | ,217 | 31,883  | 1  | ,000 | 3,400  |
| VASTY2(3)               | -,769  | ,304 | 6,424   | 1  | ,011 | ,463   |
| VASTY2(4)               | ,221   | ,244 | ,822    | 1  | ,365 | 1,247  |
| VASTY2(5)               | -,351  | ,282 | 1,551   | 1  | ,213 | ,704   |
| VASTY2(6)               | -,992  | ,328 | 9,142   | 1  | ,002 | ,371   |
| VASTY2(7)               | 1,128  | ,222 | 25,748  | 1  | ,000 | 3,091  |
| VASTY2(8)               | ,309   | ,240 | 1,658   | 1  | ,198 | 1,362  |
| VASTY2(9)               | ,244   | ,246 | ,979    | 1  | ,322 | 1,276  |
| VASTY2(10)              | 1,059  | ,219 | 23,324  | 1  | ,000 | 2,883  |
| VASTY2(11)              | ,908   | ,223 | 16,553  | 1  | ,000 | 2,479  |
| VASTY2(12)              | ,127   | ,248 | ,263    | 1  | ,608 | 1,136  |
| VASTY2(13)              | ,852   | ,224 | 14,510  | 1  | ,000 | 2,344  |
| VASTY2(14)              | -,239  | ,267 | ,798    | 1  | ,372 | ,787   |
| VASTY2(15)              | ,267   | ,242 | 1,219   | 1  | ,270 | 1,306  |
| VASTY2(16)              | ,283   | ,290 | ,954    | 1  | ,329 | 1,327  |
| VASTY2(17)              | -1,187 | ,356 | 11,133  | 1  | ,001 | ,305   |
| VASTY2(18)              | -,862  | ,320 | 7,242   | 1  | ,007 | ,422   |
| VASTY2(19)              | -1,163 | ,388 | 8,980   | 1  | ,003 | ,312   |
| VASTY2(20)              | ,077   | ,262 | ,088    | 1  | ,767 | 1,081  |
| VASTY2(21)              | -,153  | ,263 | ,339    | 1  | ,561 | ,858   |
| VASTY2(22)              | ,104   | ,252 | ,170    | 1  | ,680 | 1,110  |
| VASTY2(23)              | ,717   | ,228 | 9,883   | 1  | ,002 | 2,048  |
| VASTY2(24)              | ,581   | ,230 | 6,379   | 1  | ,012 | 1,788  |
| VASTY2(25)              | ,098   | ,265 | ,136    | 1  | ,712 | 1,103  |
| VASTY2(26)              | -,848  | ,337 | 6,333   | 1  | ,012 | ,428   |
| VASTY2(27)              | -1,244 | ,356 | 12,212  | 1  | ,000 | ,288   |
| VASTY2(28)              | -,898  | ,371 | 5,852   | 1  | ,016 | ,407   |
| VASTY2(29)              | -,934  | ,320 | 8,521   | 1  | ,004 | ,393   |
| VASTY2(30)              | ,002   | ,252 | ,000    | 1  | ,993 | 1,002  |
| VASTY2(31)              | ,562   | ,235 | 5,728   | 1  | ,017 | 1,753  |
| VASTY2(32)              | ,011   | ,261 | ,002    | 1  | ,966 | 1,011  |
| VASTY2(33)              | ,025   | ,258 | ,010    | 1  | ,922 | 1,026  |
| VASTY2(34)              | -1,559 | ,401 | 15,134  | 1  | ,000 | ,210   |
| VASTY2(35)              | ,384   | ,245 | 2,466   | 1  | ,116 | 1,469  |
| weekday                 |        |      | 19,567  | 6  | ,003 |        |

## Variables in the Equation

|                     |            | 95% C.I. for EXP(B) |       |
|---------------------|------------|---------------------|-------|
|                     |            | Lower               | Upper |
| Step 1 <sup>a</sup> | bv3        |                     |       |
|                     | bv3(1)     | ,522                | ,830  |
|                     | bv3(2)     | ,990                | 1,379 |
|                     | VASTY2     |                     |       |
|                     | VASTY2(1)  | ,911                | 2,337 |
|                     | VASTY2(2)  | 2,223               | 5,199 |
|                     | VASTY2(3)  | ,256                | ,840  |
|                     | VASTY2(4)  | ,774                | 2,010 |
|                     | VASTY2(5)  | ,405                | 1,223 |
|                     | VASTY2(6)  | ,195                | ,705  |
|                     | VASTY2(7)  | 1,999               | 4,780 |
|                     | VASTY2(8)  | ,851                | 2,181 |
|                     | VASTY2(9)  | ,787                | 2,067 |
|                     | VASTY2(10) | 1,876               | 4,432 |
|                     | VASTY2(11) | 1,601               | 3,840 |
|                     | VASTY2(12) | ,699                | 1,846 |
|                     | VASTY2(13) | 1,512               | 3,633 |
|                     | VASTY2(14) | ,466                | 1,330 |
|                     | VASTY2(15) | ,813                | 2,100 |
|                     | VASTY2(16) | ,752                | 2,341 |
|                     | VASTY2(17) | ,152                | ,613  |
|                     | VASTY2(18) | ,226                | ,791  |
|                     | VASTY2(19) | ,146                | ,669  |
|                     | VASTY2(20) | ,647                | 1,805 |
|                     | VASTY2(21) | ,513                | 1,436 |
|                     | VASTY2(22) | ,677                | 1,820 |
|                     | VASTY2(23) | 1,310               | 3,203 |
|                     | VASTY2(24) | 1,139               | 2,808 |
|                     | VASTY2(25) | ,656                | 1,853 |
|                     | VASTY2(26) | ,221                | ,829  |
|                     | VASTY2(27) | ,143                | ,579  |
|                     | VASTY2(28) | ,197                | ,843  |
|                     | VASTY2(29) | ,210                | ,736  |
|                     | VASTY2(30) | ,611                | 1,643 |
|                     | VASTY2(31) | 1,107               | 2,777 |
|                     | VASTY2(32) | ,606                | 1,687 |
|                     | VASTY2(33) | ,618                | 1,702 |
|                     | VASTY2(34) | ,096                | ,461  |
|                     | VASTY2(35) | ,909                | 2,374 |
|                     | weekday    |                     |       |

Variables in the Equation

|            | B      | S.E. | Wald    | df | Sig. | Exp(B) |
|------------|--------|------|---------|----|------|--------|
| weekday(1) | -,034  | ,107 | ,103    | 1  | ,748 | ,966   |
| weekday(2) | -,070  | ,108 | ,420    | 1  | ,517 | ,932   |
| weekday(3) | ,014   | ,107 | ,016    | 1  | ,899 | 1,014  |
| weekday(4) | ,017   | ,107 | ,024    | 1  | ,877 | 1,017  |
| weekday(5) | -,413  | ,119 | 12,114  | 1  | ,001 | ,662   |
| weekday(6) | ,050   | ,108 | ,210    | 1  | ,647 | 1,051  |
| holiday(1) | -,475  | ,201 | 5,581   | 1  | ,018 | ,622   |
| season     |        |      | 14,254  | 4  | ,007 |        |
| season(1)  | -,075  | ,092 | ,658    | 1  | ,417 | ,928   |
| season(2)  | -,191  | ,088 | 4,747   | 1  | ,029 | ,826   |
| season(3)  | ,153   | ,088 | 3,014   | 1  | ,083 | 1,165  |
| season(4)  | -,029  | ,093 | ,098    | 1  | ,754 | ,971   |
| Constant   | -2,139 | ,200 | 114,213 | 1  | ,000 | ,118   |

Variables in the Equation

|            | 95% C.I. for EXP(B) |       |
|------------|---------------------|-------|
|            | Lower               | Upper |
| weekday(1) | ,783                | 1,192 |
| weekday(2) | ,754                | 1,152 |
| weekday(3) | ,822                | 1,249 |
| weekday(4) | ,824                | 1,254 |
| weekday(5) | ,525                | ,835  |
| weekday(6) | ,850                | 1,299 |
| holiday(1) | ,419                | ,922  |
| season     |                     |       |
| season(1)  | ,774                | 1,112 |
| season(2)  | ,696                | ,981  |
| season(3)  | ,981                | 1,384 |
| season(4)  | ,809                | 1,166 |
| Constant   |                     |       |

a. Variable(s) entered on step 1: bv3, VASTY2, weekday, holiday, season.

LOGISTIC REGRESSION VARIABLES hand01

/METHOD=ENTER sv3 VASTY2 weekday holiday season

/CONTRAST (sv3)=Indicator(1)

/CONTRAST (VASTY2)=Indicator(1)

/CONTRAST (weekday)=Indicator(1)

/CONTRAST (holiday)=Indicator(1)

/CONTRAST (season)=Indicator(1)

/PRINT=CI(95)

/CRITERIA=PIN(0.05) POUT(0.10) ITERATE(20) CUT(0.5).

## Logistic Regression

[DataSet6] C:\cWordjan\Rafaela\_VCS\alla\_tillsammans\abo\_bjo\_vasa\_v1.sav

### Case Processing Summary

| Unweighted Cases <sup>a</sup> |                      | N     | Percent |
|-------------------------------|----------------------|-------|---------|
| Selected Cases                | Included in Analysis | 12475 | 100,0   |
|                               | Missing Cases        | 0     | ,0      |
|                               | Total                | 12475 | 100,0   |
| Unselected Cases              |                      | 0     | ,0      |
| Total                         |                      | 12475 | 100,0   |

a. If weight is in effect, see classification table for the total number of cases.

### Dependent Variable Encoding

| Original Value      | Internal Value |
|---------------------|----------------|
| 0 ingen händelse    | 0              |
| 1 minst en händelse | 1              |

### Categorical Variables Codings

|                           |           | Frequency | Parameter<br>(1) |
|---------------------------|-----------|-----------|------------------|
| VASTY2 (SAIR*10000)+VASTY | 403073101 | 365       | ,000             |
|                           | 403073102 | 362       | 1,000            |
|                           | 403073103 | 365       | ,000             |
|                           | 403073202 | 365       | ,000             |
|                           | 403073203 | 365       | ,000             |
|                           | 403073204 | 330       | ,000             |
|                           | 403073303 | 364       | ,000             |
|                           | 403073651 | 362       | ,000             |
|                           | 403073771 | 365       | ,000             |
|                           | 403133102 | 341       | ,000             |
|                           | 403133106 | 365       | ,000             |
|                           | 403133107 | 365       | ,000             |
|                           | 403133109 | 365       | ,000             |
|                           | 403133202 | 365       | ,000             |
|                           | 403133203 | 365       | ,000             |
|                           | 403133204 | 365       | ,000             |
|                           | 403133315 | 177       | ,000             |
|                           | 403133322 | 365       | ,000             |
|                           | 403133401 | 362       | ,000             |
|                           | 403133402 | 365       | ,000             |
| 403133550                 | 298       | ,000      |                  |
| 403133772                 | 365       | ,000      |                  |
| 403135803                 | 365       | ,000      |                  |

## Categorical Variables Codings

|                           |           | Parameter coding |       |
|---------------------------|-----------|------------------|-------|
|                           |           | (2)              | (3)   |
| VASTY2 (SAIR*10000)+VASTY | 403073101 | ,000             | ,000  |
|                           | 403073102 | ,000             | ,000  |
|                           | 403073103 | 1,000            | ,000  |
|                           | 403073202 | ,000             | 1,000 |
|                           | 403073203 | ,000             | ,000  |
|                           | 403073204 | ,000             | ,000  |
|                           | 403073303 | ,000             | ,000  |
|                           | 403073651 | ,000             | ,000  |
|                           | 403073771 | ,000             | ,000  |
|                           | 403133102 | ,000             | ,000  |
|                           | 403133106 | ,000             | ,000  |
|                           | 403133107 | ,000             | ,000  |
|                           | 403133109 | ,000             | ,000  |
|                           | 403133202 | ,000             | ,000  |
|                           | 403133203 | ,000             | ,000  |
|                           | 403133204 | ,000             | ,000  |
|                           | 403133315 | ,000             | ,000  |
|                           | 403133322 | ,000             | ,000  |
|                           | 403133401 | ,000             | ,000  |
|                           | 403133402 | ,000             | ,000  |
|                           | 403133550 | ,000             | ,000  |
|                           | 403133772 | ,000             | ,000  |
|                           | 403135803 | ,000             | ,000  |

## Categorical Variables Codings

|                           |           | Parameter coding |       |
|---------------------------|-----------|------------------|-------|
|                           |           | (4)              | (5)   |
| VASTY2 (SAIR*10000)+VASTY | 403073101 | ,000             | ,000  |
|                           | 403073102 | ,000             | ,000  |
|                           | 403073103 | ,000             | ,000  |
|                           | 403073202 | ,000             | ,000  |
|                           | 403073203 | 1,000            | ,000  |
|                           | 403073204 | ,000             | 1,000 |
|                           | 403073303 | ,000             | ,000  |
|                           | 403073651 | ,000             | ,000  |
|                           | 403073771 | ,000             | ,000  |
|                           | 403133102 | ,000             | ,000  |
|                           | 403133106 | ,000             | ,000  |
|                           | 403133107 | ,000             | ,000  |
|                           | 403133109 | ,000             | ,000  |
|                           | 403133202 | ,000             | ,000  |
|                           | 403133203 | ,000             | ,000  |
|                           | 403133204 | ,000             | ,000  |
|                           | 403133315 | ,000             | ,000  |
|                           | 403133322 | ,000             | ,000  |
|                           | 403133401 | ,000             | ,000  |
|                           | 403133402 | ,000             | ,000  |
|                           | 403133550 | ,000             | ,000  |
|                           | 403133772 | ,000             | ,000  |
|                           | 403135803 | ,000             | ,000  |

## Categorical Variables Codings

|                           |           | Parameter coding |       |
|---------------------------|-----------|------------------|-------|
|                           |           | (6)              | (7)   |
| VASTY2 (SAIR*10000)+VASTY | 403073101 | ,000             | ,000  |
|                           | 403073102 | ,000             | ,000  |
|                           | 403073103 | ,000             | ,000  |
|                           | 403073202 | ,000             | ,000  |
|                           | 403073203 | ,000             | ,000  |
|                           | 403073204 | ,000             | ,000  |
|                           | 403073303 | 1,000            | ,000  |
|                           | 403073651 | ,000             | 1,000 |
|                           | 403073771 | ,000             | ,000  |
|                           | 403133102 | ,000             | ,000  |
|                           | 403133106 | ,000             | ,000  |
|                           | 403133107 | ,000             | ,000  |
|                           | 403133109 | ,000             | ,000  |
|                           | 403133202 | ,000             | ,000  |
|                           | 403133203 | ,000             | ,000  |
|                           | 403133204 | ,000             | ,000  |
|                           | 403133315 | ,000             | ,000  |
|                           | 403133322 | ,000             | ,000  |
|                           | 403133401 | ,000             | ,000  |
|                           | 403133402 | ,000             | ,000  |
|                           | 403133550 | ,000             | ,000  |
|                           | 403133772 | ,000             | ,000  |
|                           | 403135803 | ,000             | ,000  |



**Categorical Variables Codings**

|                           |           | Parameter coding |       |
|---------------------------|-----------|------------------|-------|
|                           |           | (8)              | (9)   |
| VASTY2 (SAIR*10000)+VASTY | 403073101 | ,000             | ,000  |
|                           | 403073102 | ,000             | ,000  |
|                           | 403073103 | ,000             | ,000  |
|                           | 403073202 | ,000             | ,000  |
|                           | 403073203 | ,000             | ,000  |
|                           | 403073204 | ,000             | ,000  |
|                           | 403073303 | ,000             | ,000  |
|                           | 403073651 | ,000             | ,000  |
|                           | 403073771 | 1,000            | ,000  |
|                           | 403133102 | ,000             | 1,000 |
|                           | 403133106 | ,000             | ,000  |
|                           | 403133107 | ,000             | ,000  |
|                           | 403133109 | ,000             | ,000  |
|                           | 403133202 | ,000             | ,000  |
|                           | 403133203 | ,000             | ,000  |
|                           | 403133204 | ,000             | ,000  |
|                           | 403133315 | ,000             | ,000  |
|                           | 403133322 | ,000             | ,000  |
|                           | 403133401 | ,000             | ,000  |
|                           | 403133402 | ,000             | ,000  |
|                           | 403133550 | ,000             | ,000  |
|                           | 403133772 | ,000             | ,000  |
|                           | 403135803 | ,000             | ,000  |

Peer review only

## Categorical Variables Codings

|                           |           | Parameter coding |       |
|---------------------------|-----------|------------------|-------|
|                           |           | (10)             | (11)  |
| VASTY2 (SAIR*10000)+VASTY | 403073101 | ,000             | ,000  |
|                           | 403073102 | ,000             | ,000  |
|                           | 403073103 | ,000             | ,000  |
|                           | 403073202 | ,000             | ,000  |
|                           | 403073203 | ,000             | ,000  |
|                           | 403073204 | ,000             | ,000  |
|                           | 403073303 | ,000             | ,000  |
|                           | 403073651 | ,000             | ,000  |
|                           | 403073771 | ,000             | ,000  |
|                           | 403133102 | ,000             | ,000  |
|                           | 403133106 | 1,000            | ,000  |
|                           | 403133107 | ,000             | 1,000 |
|                           | 403133109 | ,000             | ,000  |
|                           | 403133202 | ,000             | ,000  |
|                           | 403133203 | ,000             | ,000  |
|                           | 403133204 | ,000             | ,000  |
|                           | 403133315 | ,000             | ,000  |
|                           | 403133322 | ,000             | ,000  |
|                           | 403133401 | ,000             | ,000  |
|                           | 403133402 | ,000             | ,000  |
|                           | 403133550 | ,000             | ,000  |
|                           | 403133772 | ,000             | ,000  |
|                           | 403135803 | ,000             | ,000  |

## Categorical Variables Codings

|                           |           | Parameter coding |       |
|---------------------------|-----------|------------------|-------|
|                           |           | (12)             | (13)  |
| VASTY2 (SAIR*10000)+VASTY | 403073101 | ,000             | ,000  |
|                           | 403073102 | ,000             | ,000  |
|                           | 403073103 | ,000             | ,000  |
|                           | 403073202 | ,000             | ,000  |
|                           | 403073203 | ,000             | ,000  |
|                           | 403073204 | ,000             | ,000  |
|                           | 403073303 | ,000             | ,000  |
|                           | 403073651 | ,000             | ,000  |
|                           | 403073771 | ,000             | ,000  |
|                           | 403133102 | ,000             | ,000  |
|                           | 403133106 | ,000             | ,000  |
|                           | 403133107 | ,000             | ,000  |
|                           | 403133109 | 1,000            | ,000  |
|                           | 403133202 | ,000             | 1,000 |
|                           | 403133203 | ,000             | ,000  |
|                           | 403133204 | ,000             | ,000  |
|                           | 403133315 | ,000             | ,000  |
|                           | 403133322 | ,000             | ,000  |
|                           | 403133401 | ,000             | ,000  |
|                           | 403133402 | ,000             | ,000  |
|                           | 403133550 | ,000             | ,000  |
|                           | 403133772 | ,000             | ,000  |
|                           | 403135803 | ,000             | ,000  |

## Categorical Variables Codings

|                           |           | Parameter coding |       |
|---------------------------|-----------|------------------|-------|
|                           |           | (14)             | (15)  |
| VASTY2 (SAIR*10000)+VASTY | 403073101 | ,000             | ,000  |
|                           | 403073102 | ,000             | ,000  |
|                           | 403073103 | ,000             | ,000  |
|                           | 403073202 | ,000             | ,000  |
|                           | 403073203 | ,000             | ,000  |
|                           | 403073204 | ,000             | ,000  |
|                           | 403073303 | ,000             | ,000  |
|                           | 403073651 | ,000             | ,000  |
|                           | 403073771 | ,000             | ,000  |
|                           | 403133102 | ,000             | ,000  |
|                           | 403133106 | ,000             | ,000  |
|                           | 403133107 | ,000             | ,000  |
|                           | 403133109 | ,000             | ,000  |
|                           | 403133202 | ,000             | ,000  |
|                           | 403133203 | 1,000            | ,000  |
|                           | 403133204 | ,000             | 1,000 |
|                           | 403133315 | ,000             | ,000  |
|                           | 403133322 | ,000             | ,000  |
|                           | 403133401 | ,000             | ,000  |
|                           | 403133402 | ,000             | ,000  |
|                           | 403133550 | ,000             | ,000  |
|                           | 403133772 | ,000             | ,000  |
|                           | 403135803 | ,000             | ,000  |

**Categorical Variables Codings**

|                           |           | Parameter coding |       |
|---------------------------|-----------|------------------|-------|
|                           |           | (16)             | (17)  |
| VASTY2 (SAIR*10000)+VASTY | 403073101 | ,000             | ,000  |
|                           | 403073102 | ,000             | ,000  |
|                           | 403073103 | ,000             | ,000  |
|                           | 403073202 | ,000             | ,000  |
|                           | 403073203 | ,000             | ,000  |
|                           | 403073204 | ,000             | ,000  |
|                           | 403073303 | ,000             | ,000  |
|                           | 403073651 | ,000             | ,000  |
|                           | 403073771 | ,000             | ,000  |
|                           | 403133102 | ,000             | ,000  |
|                           | 403133106 | ,000             | ,000  |
|                           | 403133107 | ,000             | ,000  |
|                           | 403133109 | ,000             | ,000  |
|                           | 403133202 | ,000             | ,000  |
|                           | 403133203 | ,000             | ,000  |
|                           | 403133204 | ,000             | ,000  |
|                           | 403133315 | 1,000            | ,000  |
|                           | 403133322 | ,000             | 1,000 |
|                           | 403133401 | ,000             | ,000  |
|                           | 403133402 | ,000             | ,000  |
|                           | 403133550 | ,000             | ,000  |
|                           | 403133772 | ,000             | ,000  |
|                           | 403135803 | ,000             | ,000  |

Peer Review Only

## Categorical Variables Codings

|                           |           | Parameter coding |       |
|---------------------------|-----------|------------------|-------|
|                           |           | (18)             | (19)  |
| VASTY2 (SAIR*10000)+VASTY | 403073101 | ,000             | ,000  |
|                           | 403073102 | ,000             | ,000  |
|                           | 403073103 | ,000             | ,000  |
|                           | 403073202 | ,000             | ,000  |
|                           | 403073203 | ,000             | ,000  |
|                           | 403073204 | ,000             | ,000  |
|                           | 403073303 | ,000             | ,000  |
|                           | 403073651 | ,000             | ,000  |
|                           | 403073771 | ,000             | ,000  |
|                           | 403133102 | ,000             | ,000  |
|                           | 403133106 | ,000             | ,000  |
|                           | 403133107 | ,000             | ,000  |
|                           | 403133109 | ,000             | ,000  |
|                           | 403133202 | ,000             | ,000  |
|                           | 403133203 | ,000             | ,000  |
|                           | 403133204 | ,000             | ,000  |
|                           | 403133315 | ,000             | ,000  |
|                           | 403133322 | ,000             | ,000  |
|                           | 403133401 | 1,000            | ,000  |
|                           | 403133402 | ,000             | 1,000 |
|                           | 403133550 | ,000             | ,000  |
|                           | 403133772 | ,000             | ,000  |
|                           | 403135803 | ,000             | ,000  |

## Categorical Variables Codings

|                           |           | Parameter coding |       |
|---------------------------|-----------|------------------|-------|
|                           |           | (20)             | (21)  |
| VASTY2 (SAIR*10000)+VASTY | 403073101 | ,000             | ,000  |
|                           | 403073102 | ,000             | ,000  |
|                           | 403073103 | ,000             | ,000  |
|                           | 403073202 | ,000             | ,000  |
|                           | 403073203 | ,000             | ,000  |
|                           | 403073204 | ,000             | ,000  |
|                           | 403073303 | ,000             | ,000  |
|                           | 403073651 | ,000             | ,000  |
|                           | 403073771 | ,000             | ,000  |
|                           | 403133102 | ,000             | ,000  |
|                           | 403133106 | ,000             | ,000  |
|                           | 403133107 | ,000             | ,000  |
|                           | 403133109 | ,000             | ,000  |
|                           | 403133202 | ,000             | ,000  |
|                           | 403133203 | ,000             | ,000  |
|                           | 403133204 | ,000             | ,000  |
|                           | 403133315 | ,000             | ,000  |
|                           | 403133322 | ,000             | ,000  |
|                           | 403133401 | ,000             | ,000  |
|                           | 403133402 | ,000             | ,000  |
|                           | 403133550 | 1,000            | ,000  |
|                           | 403133772 | ,000             | 1,000 |
|                           | 403135803 | ,000             | ,000  |

## Categorical Variables Codings

|                           |           | Parameter coding |      |
|---------------------------|-----------|------------------|------|
|                           |           | (22)             | (23) |
| VASTY2 (SAIR*10000)+VASTY | 403073101 | ,000             | ,000 |
|                           | 403073102 | ,000             | ,000 |
|                           | 403073103 | ,000             | ,000 |
|                           | 403073202 | ,000             | ,000 |
|                           | 403073203 | ,000             | ,000 |
|                           | 403073204 | ,000             | ,000 |
|                           | 403073303 | ,000             | ,000 |
|                           | 403073651 | ,000             | ,000 |
|                           | 403073771 | ,000             | ,000 |
|                           | 403133102 | ,000             | ,000 |
|                           | 403133106 | ,000             | ,000 |
|                           | 403133107 | ,000             | ,000 |
|                           | 403133109 | ,000             | ,000 |
|                           | 403133202 | ,000             | ,000 |
|                           | 403133203 | ,000             | ,000 |
|                           | 403133204 | ,000             | ,000 |
|                           | 403133315 | ,000             | ,000 |
|                           | 403133322 | ,000             | ,000 |
|                           | 403133401 | ,000             | ,000 |
|                           | 403133402 | ,000             | ,000 |
|                           | 403133550 | ,000             | ,000 |
|                           | 403133772 | ,000             | ,000 |
|                           | 403135803 | 1,000            | ,000 |



## Categorical Variables Codings

|                           |           | Parameter coding |      |
|---------------------------|-----------|------------------|------|
|                           |           | (24)             | (25) |
| VASTY2 (SAIR*10000)+VASTY | 403073101 | ,000             | ,000 |
|                           | 403073102 | ,000             | ,000 |
|                           | 403073103 | ,000             | ,000 |
|                           | 403073202 | ,000             | ,000 |
|                           | 403073203 | ,000             | ,000 |
|                           | 403073204 | ,000             | ,000 |
|                           | 403073303 | ,000             | ,000 |
|                           | 403073651 | ,000             | ,000 |
|                           | 403073771 | ,000             | ,000 |
|                           | 403133102 | ,000             | ,000 |
|                           | 403133106 | ,000             | ,000 |
|                           | 403133107 | ,000             | ,000 |
|                           | 403133109 | ,000             | ,000 |
|                           | 403133202 | ,000             | ,000 |
|                           | 403133203 | ,000             | ,000 |
|                           | 403133204 | ,000             | ,000 |
|                           | 403133315 | ,000             | ,000 |
|                           | 403133322 | ,000             | ,000 |
|                           | 403133401 | ,000             | ,000 |
|                           | 403133402 | ,000             | ,000 |
|                           | 403133550 | ,000             | ,000 |
|                           | 403133772 | ,000             | ,000 |
|                           | 403135803 | ,000             | ,000 |

## Categorical Variables Codings

|                           |           | Parameter coding |      |
|---------------------------|-----------|------------------|------|
|                           |           | (26)             | (27) |
| VASTY2 (SAIR*10000)+VASTY | 403073101 | ,000             | ,000 |
|                           | 403073102 | ,000             | ,000 |
|                           | 403073103 | ,000             | ,000 |
|                           | 403073202 | ,000             | ,000 |
|                           | 403073203 | ,000             | ,000 |
|                           | 403073204 | ,000             | ,000 |
|                           | 403073303 | ,000             | ,000 |
|                           | 403073651 | ,000             | ,000 |
|                           | 403073771 | ,000             | ,000 |
|                           | 403133102 | ,000             | ,000 |
|                           | 403133106 | ,000             | ,000 |
|                           | 403133107 | ,000             | ,000 |
|                           | 403133109 | ,000             | ,000 |
|                           | 403133202 | ,000             | ,000 |
|                           | 403133203 | ,000             | ,000 |
|                           | 403133204 | ,000             | ,000 |
|                           | 403133315 | ,000             | ,000 |
|                           | 403133322 | ,000             | ,000 |
|                           | 403133401 | ,000             | ,000 |
|                           | 403133402 | ,000             | ,000 |
|                           | 403133550 | ,000             | ,000 |
|                           | 403133772 | ,000             | ,000 |
|                           | 403135803 | ,000             | ,000 |

## Categorical Variables Codings

|                           |           | Parameter coding |      |
|---------------------------|-----------|------------------|------|
|                           |           | (28)             | (29) |
| VASTY2 (SAIR*10000)+VASTY | 403073101 | ,000             | ,000 |
|                           | 403073102 | ,000             | ,000 |
|                           | 403073103 | ,000             | ,000 |
|                           | 403073202 | ,000             | ,000 |
|                           | 403073203 | ,000             | ,000 |
|                           | 403073204 | ,000             | ,000 |
|                           | 403073303 | ,000             | ,000 |
|                           | 403073651 | ,000             | ,000 |
|                           | 403073771 | ,000             | ,000 |
|                           | 403133102 | ,000             | ,000 |
|                           | 403133106 | ,000             | ,000 |
|                           | 403133107 | ,000             | ,000 |
|                           | 403133109 | ,000             | ,000 |
|                           | 403133202 | ,000             | ,000 |
|                           | 403133203 | ,000             | ,000 |
|                           | 403133204 | ,000             | ,000 |
|                           | 403133315 | ,000             | ,000 |
|                           | 403133322 | ,000             | ,000 |
|                           | 403133401 | ,000             | ,000 |
|                           | 403133402 | ,000             | ,000 |
|                           | 403133550 | ,000             | ,000 |
|                           | 403133772 | ,000             | ,000 |
|                           | 403135803 | ,000             | ,000 |

## Categorical Variables Codings

|                           |           | Parameter coding |      |
|---------------------------|-----------|------------------|------|
|                           |           | (30)             | (31) |
| VASTY2 (SAIR*10000)+VASTY | 403073101 | ,000             | ,000 |
|                           | 403073102 | ,000             | ,000 |
|                           | 403073103 | ,000             | ,000 |
|                           | 403073202 | ,000             | ,000 |
|                           | 403073203 | ,000             | ,000 |
|                           | 403073204 | ,000             | ,000 |
|                           | 403073303 | ,000             | ,000 |
|                           | 403073651 | ,000             | ,000 |
|                           | 403073771 | ,000             | ,000 |
|                           | 403133102 | ,000             | ,000 |
|                           | 403133106 | ,000             | ,000 |
|                           | 403133107 | ,000             | ,000 |
|                           | 403133109 | ,000             | ,000 |
|                           | 403133202 | ,000             | ,000 |
|                           | 403133203 | ,000             | ,000 |
|                           | 403133204 | ,000             | ,000 |
|                           | 403133315 | ,000             | ,000 |
|                           | 403133322 | ,000             | ,000 |
|                           | 403133401 | ,000             | ,000 |
|                           | 403133402 | ,000             | ,000 |
|                           | 403133550 | ,000             | ,000 |
|                           | 403133772 | ,000             | ,000 |
|                           | 403135803 | ,000             | ,000 |

## Categorical Variables Codings

|                           |           | Parameter coding |      |
|---------------------------|-----------|------------------|------|
|                           |           | (32)             | (33) |
| VASTY2 (SAIR*10000)+VASTY | 403073101 | ,000             | ,000 |
|                           | 403073102 | ,000             | ,000 |
|                           | 403073103 | ,000             | ,000 |
|                           | 403073202 | ,000             | ,000 |
|                           | 403073203 | ,000             | ,000 |
|                           | 403073204 | ,000             | ,000 |
|                           | 403073303 | ,000             | ,000 |
|                           | 403073651 | ,000             | ,000 |
|                           | 403073771 | ,000             | ,000 |
|                           | 403133102 | ,000             | ,000 |
|                           | 403133106 | ,000             | ,000 |
|                           | 403133107 | ,000             | ,000 |
|                           | 403133109 | ,000             | ,000 |
|                           | 403133202 | ,000             | ,000 |
|                           | 403133203 | ,000             | ,000 |
|                           | 403133204 | ,000             | ,000 |
|                           | 403133315 | ,000             | ,000 |
|                           | 403133322 | ,000             | ,000 |
|                           | 403133401 | ,000             | ,000 |
|                           | 403133402 | ,000             | ,000 |
|                           | 403133550 | ,000             | ,000 |
|                           | 403133772 | ,000             | ,000 |
|                           | 403135803 | ,000             | ,000 |

## Categorical Variables Codings

|                           |           | Parameter coding |      |
|---------------------------|-----------|------------------|------|
|                           |           | (34)             | (35) |
| VASTY2 (SAIR*10000)+VASTY | 403073101 | ,000             | ,000 |
|                           | 403073102 | ,000             | ,000 |
|                           | 403073103 | ,000             | ,000 |
|                           | 403073202 | ,000             | ,000 |
|                           | 403073203 | ,000             | ,000 |
|                           | 403073204 | ,000             | ,000 |
|                           | 403073303 | ,000             | ,000 |
|                           | 403073651 | ,000             | ,000 |
|                           | 403073771 | ,000             | ,000 |
|                           | 403133102 | ,000             | ,000 |
|                           | 403133106 | ,000             | ,000 |
|                           | 403133107 | ,000             | ,000 |
|                           | 403133109 | ,000             | ,000 |
|                           | 403133202 | ,000             | ,000 |
|                           | 403133203 | ,000             | ,000 |
|                           | 403133204 | ,000             | ,000 |
|                           | 403133315 | ,000             | ,000 |
|                           | 403133322 | ,000             | ,000 |
|                           | 403133401 | ,000             | ,000 |
|                           | 403133402 | ,000             | ,000 |
|                           | 403133550 | ,000             | ,000 |
|                           | 403133772 | ,000             | ,000 |
|                           | 403135803 | ,000             | ,000 |

## Categorical Variables Codings

|                              |                                         | Frequency | Parameter<br>(1) |
|------------------------------|-----------------------------------------|-----------|------------------|
|                              | 404060001                               | 365       | ,000             |
|                              | 404060002                               | 366       | ,000             |
|                              | 404310003                               | 291       | ,000             |
|                              | 404310004                               | 291       | ,000             |
|                              | 502300005                               | 366       | ,000             |
|                              | 502300006                               | 225       | ,000             |
|                              | 502300007                               | 366       | ,000             |
|                              | 502300214                               | 366       | ,000             |
|                              | 502300411                               | 366       | ,000             |
|                              | 502300415                               | 360       | ,000             |
|                              | 502300416                               | 363       | ,000             |
|                              | 502300811                               | 364       | ,000             |
|                              | 502300913                               | 315       | ,000             |
| weekday veckodag             | 1 måndag                                | 1805      | ,000             |
|                              | 2 tisdag                                | 1812      | 1,000            |
|                              | 3 onsdag                                | 1800      | ,000             |
|                              | 4 torsdag                               | 1794      | ,000             |
|                              | 5 fredag                                | 1788      | ,000             |
|                              | 6 lördag                                | 1735      | ,000             |
|                              | 7 söndag                                | 1741      | ,000             |
| season säsong/period         | 1 januari-mars                          | 3182      | ,000             |
|                              | 2 april-maj                             | 2127      | 1,000            |
|                              | 3 juni-augusti                          | 2911      | ,000             |
|                              | 4 september-oktober                     | 2144      | ,000             |
|                              | 5 november-december                     | 2111      | ,000             |
| sv3 tredjedelar för standard | 1 andra tredjedelen                     | 3172      | ,000             |
|                              | 2 första tredjedelen                    | 4718      | 1,000            |
|                              | 3 tredje tredjedelen                    | 4585      | ,000             |
| holiday större helg          | 1 ingen större helg                     | 12078     | ,000             |
|                              | 2 större helg (påsk/midsommar/julonyår) | 397       | 1,000            |

## Categorical Variables Codings

|                              |                                         | Parameter coding |       |
|------------------------------|-----------------------------------------|------------------|-------|
|                              |                                         | (2)              | (3)   |
|                              | 404060001                               | ,000             | ,000  |
|                              | 404060002                               | ,000             | ,000  |
|                              | 404310003                               | ,000             | ,000  |
|                              | 404310004                               | ,000             | ,000  |
|                              | 502300005                               | ,000             | ,000  |
|                              | 502300006                               | ,000             | ,000  |
|                              | 502300007                               | ,000             | ,000  |
|                              | 502300214                               | ,000             | ,000  |
|                              | 502300411                               | ,000             | ,000  |
|                              | 502300415                               | ,000             | ,000  |
|                              | 502300416                               | ,000             | ,000  |
|                              | 502300811                               | ,000             | ,000  |
|                              | 502300913                               | ,000             | ,000  |
| weekday veckodag             | 1 måndag                                | ,000             | ,000  |
|                              | 2 tisdag                                | ,000             | ,000  |
|                              | 3 onsdag                                | 1,000            | ,000  |
|                              | 4 torsdag                               | ,000             | 1,000 |
|                              | 5 fredag                                | ,000             | ,000  |
|                              | 6 lördag                                | ,000             | ,000  |
|                              | 7 söndag                                | ,000             | ,000  |
| season säsong/period         | 1 januari-mars                          | ,000             | ,000  |
|                              | 2 april-maj                             | ,000             | ,000  |
|                              | 3 juni-augusti                          | 1,000            | ,000  |
|                              | 4 september-oktober                     | ,000             | 1,000 |
|                              | 5 november-december                     | ,000             | ,000  |
| sv3 tredjedelar för standard | 1 andra tredjedelen                     | ,000             |       |
|                              | 2 första tredjedelen                    | ,000             |       |
|                              | 3 tredje tredjedelen                    | 1,000            |       |
| holiday större helg          | 1 ingen större helg                     |                  |       |
|                              | 2 större helg (påsk/midsommar/julonyår) |                  |       |



## Categorical Variables Codings

|                              |                                         | Parameter coding |       |
|------------------------------|-----------------------------------------|------------------|-------|
|                              |                                         | (4)              | (5)   |
|                              | 404060001                               | ,000             | ,000  |
|                              | 404060002                               | ,000             | ,000  |
|                              | 404310003                               | ,000             | ,000  |
|                              | 404310004                               | ,000             | ,000  |
|                              | 502300005                               | ,000             | ,000  |
|                              | 502300006                               | ,000             | ,000  |
|                              | 502300007                               | ,000             | ,000  |
|                              | 502300214                               | ,000             | ,000  |
|                              | 502300411                               | ,000             | ,000  |
|                              | 502300415                               | ,000             | ,000  |
|                              | 502300416                               | ,000             | ,000  |
|                              | 502300811                               | ,000             | ,000  |
|                              | 502300913                               | ,000             | ,000  |
| weekday veckodag             | 1 måndag                                | ,000             | ,000  |
|                              | 2 tisdag                                | ,000             | ,000  |
|                              | 3 onsdag                                | ,000             | ,000  |
|                              | 4 torsdag                               | ,000             | ,000  |
|                              | 5 fredag                                | 1,000            | ,000  |
|                              | 6 lördag                                | ,000             | 1,000 |
|                              | 7 söndag                                | ,000             | ,000  |
| season säsong/period         | 1 januari-mars                          | ,000             |       |
|                              | 2 april-maj                             | ,000             |       |
|                              | 3 juni-augusti                          | ,000             |       |
|                              | 4 september-oktober                     | ,000             |       |
|                              | 5 november-december                     | 1,000            |       |
| sv3 tredjedelar för standard | 1 andra tredjedelen                     |                  |       |
|                              | 2 första tredjedelen                    |                  |       |
|                              | 3 tredje tredjedelen                    |                  |       |
| holiday större helg          | 1 ingen större helg                     |                  |       |
|                              | 2 större helg (påsk/midsommar/julonyår) |                  |       |

## Categorical Variables Codings

|                              |                                         | Parameter coding |      |
|------------------------------|-----------------------------------------|------------------|------|
|                              |                                         | (6)              | (7)  |
|                              | 404060001                               | ,000             | ,000 |
|                              | 404060002                               | ,000             | ,000 |
|                              | 404310003                               | ,000             | ,000 |
|                              | 404310004                               | ,000             | ,000 |
|                              | 502300005                               | ,000             | ,000 |
|                              | 502300006                               | ,000             | ,000 |
|                              | 502300007                               | ,000             | ,000 |
|                              | 502300214                               | ,000             | ,000 |
|                              | 502300411                               | ,000             | ,000 |
|                              | 502300415                               | ,000             | ,000 |
|                              | 502300416                               | ,000             | ,000 |
|                              | 502300811                               | ,000             | ,000 |
|                              | 502300913                               | ,000             | ,000 |
| weekday veckodag             | 1 måndag                                | ,000             |      |
|                              | 2 tisdag                                | ,000             |      |
|                              | 3 onsdag                                | ,000             |      |
|                              | 4 torsdag                               | ,000             |      |
|                              | 5 fredag                                | ,000             |      |
|                              | 6 lördag                                | ,000             |      |
|                              | 7 söndag                                | 1,000            |      |
| season säsong/period         | 1 januari-mars                          |                  |      |
|                              | 2 april-maj                             |                  |      |
|                              | 3 juni-augusti                          |                  |      |
|                              | 4 september-oktober                     |                  |      |
|                              | 5 november-december                     |                  |      |
| sv3 tredjedelar för standard | 1 andra tredjedelen                     |                  |      |
|                              | 2 första tredjedelen                    |                  |      |
|                              | 3 tredje tredjedelen                    |                  |      |
| holiday större helg          | 1 ingen större helg                     |                  |      |
|                              | 2 större helg (påsk/midsommar/julonyår) |                  |      |

## Categorical Variables Codings

|                              |                                         | Parameter coding |      |
|------------------------------|-----------------------------------------|------------------|------|
|                              |                                         | (8)              | (9)  |
|                              | 404060001                               | ,000             | ,000 |
|                              | 404060002                               | ,000             | ,000 |
|                              | 404310003                               | ,000             | ,000 |
|                              | 404310004                               | ,000             | ,000 |
|                              | 502300005                               | ,000             | ,000 |
|                              | 502300006                               | ,000             | ,000 |
|                              | 502300007                               | ,000             | ,000 |
|                              | 502300214                               | ,000             | ,000 |
|                              | 502300411                               | ,000             | ,000 |
|                              | 502300415                               | ,000             | ,000 |
|                              | 502300416                               | ,000             | ,000 |
|                              | 502300811                               | ,000             | ,000 |
|                              | 502300913                               | ,000             | ,000 |
| weekday veckodag             | 1 måndag                                |                  |      |
|                              | 2 tisdag                                |                  |      |
|                              | 3 onsdag                                |                  |      |
|                              | 4 torsdag                               |                  |      |
|                              | 5 fredag                                |                  |      |
|                              | 6 lördag                                |                  |      |
|                              | 7 söndag                                |                  |      |
| season säsong/period         | 1 januari-mars                          |                  |      |
|                              | 2 april-maj                             |                  |      |
|                              | 3 juni-augusti                          |                  |      |
|                              | 4 september-oktober                     |                  |      |
|                              | 5 november-december                     |                  |      |
| sv3 tredjedelar för standard | 1 andra tredjedelen                     |                  |      |
|                              | 2 första tredjedelen                    |                  |      |
|                              | 3 tredje tredjedelen                    |                  |      |
| holiday större helg          | 1 ingen större helg                     |                  |      |
|                              | 2 större helg (påsk/midsommar/julonyår) |                  |      |

## Categorical Variables Codings

|                              |                                         | Parameter coding |      |
|------------------------------|-----------------------------------------|------------------|------|
|                              |                                         | (10)             | (11) |
|                              | 404060001                               | ,000             | ,000 |
|                              | 404060002                               | ,000             | ,000 |
|                              | 404310003                               | ,000             | ,000 |
|                              | 404310004                               | ,000             | ,000 |
|                              | 502300005                               | ,000             | ,000 |
|                              | 502300006                               | ,000             | ,000 |
|                              | 502300007                               | ,000             | ,000 |
|                              | 502300214                               | ,000             | ,000 |
|                              | 502300411                               | ,000             | ,000 |
|                              | 502300415                               | ,000             | ,000 |
|                              | 502300416                               | ,000             | ,000 |
|                              | 502300811                               | ,000             | ,000 |
|                              | 502300913                               | ,000             | ,000 |
| weekday veckodag             | 1 måndag                                |                  |      |
|                              | 2 tisdag                                |                  |      |
|                              | 3 onsdag                                |                  |      |
|                              | 4 torsdag                               |                  |      |
|                              | 5 fredag                                |                  |      |
|                              | 6 lördag                                |                  |      |
|                              | 7 söndag                                |                  |      |
| season säsong/period         | 1 januari-mars                          |                  |      |
|                              | 2 april-maj                             |                  |      |
|                              | 3 juni-augusti                          |                  |      |
|                              | 4 september-oktober                     |                  |      |
|                              | 5 november-december                     |                  |      |
| sv3 tredjedelar för standard | 1 andra tredjedelen                     |                  |      |
|                              | 2 första tredjedelen                    |                  |      |
|                              | 3 tredje tredjedelen                    |                  |      |
| holiday större helg          | 1 ingen större helg                     |                  |      |
|                              | 2 större helg (påsk/midsommar/julonyår) |                  |      |

## Categorical Variables Codings

|                              |                                         | Parameter coding |      |
|------------------------------|-----------------------------------------|------------------|------|
|                              |                                         | (12)             | (13) |
|                              | 404060001                               | ,000             | ,000 |
|                              | 404060002                               | ,000             | ,000 |
|                              | 404310003                               | ,000             | ,000 |
|                              | 404310004                               | ,000             | ,000 |
|                              | 502300005                               | ,000             | ,000 |
|                              | 502300006                               | ,000             | ,000 |
|                              | 502300007                               | ,000             | ,000 |
|                              | 502300214                               | ,000             | ,000 |
|                              | 502300411                               | ,000             | ,000 |
|                              | 502300415                               | ,000             | ,000 |
|                              | 502300416                               | ,000             | ,000 |
|                              | 502300811                               | ,000             | ,000 |
|                              | 502300913                               | ,000             | ,000 |
| weekday veckodag             | 1 måndag                                |                  |      |
|                              | 2 tisdag                                |                  |      |
|                              | 3 onsdag                                |                  |      |
|                              | 4 torsdag                               |                  |      |
|                              | 5 fredag                                |                  |      |
|                              | 6 lördag                                |                  |      |
|                              | 7 söndag                                |                  |      |
| season säsong/period         | 1 januari-mars                          |                  |      |
|                              | 2 april-maj                             |                  |      |
|                              | 3 juni-augusti                          |                  |      |
|                              | 4 september-oktober                     |                  |      |
|                              | 5 november-december                     |                  |      |
| sv3 tredjedelar för standard | 1 andra tredjedelen                     |                  |      |
|                              | 2 första tredjedelen                    |                  |      |
|                              | 3 tredje tredjedelen                    |                  |      |
| holiday större helg          | 1 ingen större helg                     |                  |      |
|                              | 2 större helg (påsk/midsommar/julonyår) |                  |      |

## Categorical Variables Codings

|                              |                                         | Parameter coding |      |
|------------------------------|-----------------------------------------|------------------|------|
|                              |                                         | (14)             | (15) |
|                              | 404060001                               | ,000             | ,000 |
|                              | 404060002                               | ,000             | ,000 |
|                              | 404310003                               | ,000             | ,000 |
|                              | 404310004                               | ,000             | ,000 |
|                              | 502300005                               | ,000             | ,000 |
|                              | 502300006                               | ,000             | ,000 |
|                              | 502300007                               | ,000             | ,000 |
|                              | 502300214                               | ,000             | ,000 |
|                              | 502300411                               | ,000             | ,000 |
|                              | 502300415                               | ,000             | ,000 |
|                              | 502300416                               | ,000             | ,000 |
|                              | 502300811                               | ,000             | ,000 |
|                              | 502300913                               | ,000             | ,000 |
| weekday veckodag             | 1 måndag                                |                  |      |
|                              | 2 tisdag                                |                  |      |
|                              | 3 onsdag                                |                  |      |
|                              | 4 torsdag                               |                  |      |
|                              | 5 fredag                                |                  |      |
|                              | 6 lördag                                |                  |      |
|                              | 7 söndag                                |                  |      |
| season säsong/period         | 1 januari-mars                          |                  |      |
|                              | 2 april-maj                             |                  |      |
|                              | 3 juni-augusti                          |                  |      |
|                              | 4 september-oktober                     |                  |      |
|                              | 5 november-december                     |                  |      |
| sv3 tredjedelar för standard | 1 andra tredjedelen                     |                  |      |
|                              | 2 första tredjedelen                    |                  |      |
|                              | 3 tredje tredjedelen                    |                  |      |
| holiday större helg          | 1 ingen större helg                     |                  |      |
|                              | 2 större helg (påsk/midsommar/julonyår) |                  |      |

## Categorical Variables Codings

|                              |                                         | Parameter coding |      |
|------------------------------|-----------------------------------------|------------------|------|
|                              |                                         | (16)             | (17) |
|                              | 404060001                               | ,000             | ,000 |
|                              | 404060002                               | ,000             | ,000 |
|                              | 404310003                               | ,000             | ,000 |
|                              | 404310004                               | ,000             | ,000 |
|                              | 502300005                               | ,000             | ,000 |
|                              | 502300006                               | ,000             | ,000 |
|                              | 502300007                               | ,000             | ,000 |
|                              | 502300214                               | ,000             | ,000 |
|                              | 502300411                               | ,000             | ,000 |
|                              | 502300415                               | ,000             | ,000 |
|                              | 502300416                               | ,000             | ,000 |
|                              | 502300811                               | ,000             | ,000 |
|                              | 502300913                               | ,000             | ,000 |
| weekday veckodag             | 1 måndag                                |                  |      |
|                              | 2 tisdag                                |                  |      |
|                              | 3 onsdag                                |                  |      |
|                              | 4 torsdag                               |                  |      |
|                              | 5 fredag                                |                  |      |
|                              | 6 lördag                                |                  |      |
|                              | 7 söndag                                |                  |      |
| season säsong/period         | 1 januari-mars                          |                  |      |
|                              | 2 april-maj                             |                  |      |
|                              | 3 juni-augusti                          |                  |      |
|                              | 4 september-oktober                     |                  |      |
|                              | 5 november-december                     |                  |      |
| sv3 tredjedelar för standard | 1 andra tredjedelen                     |                  |      |
|                              | 2 första tredjedelen                    |                  |      |
|                              | 3 tredje tredjedelen                    |                  |      |
| holiday större helg          | 1 ingen större helg                     |                  |      |
|                              | 2 större helg (påsk/midsommar/julonyår) |                  |      |

## Categorical Variables Codings

|                              |                                         | Parameter coding |      |
|------------------------------|-----------------------------------------|------------------|------|
|                              |                                         | (18)             | (19) |
|                              | 404060001                               | ,000             | ,000 |
|                              | 404060002                               | ,000             | ,000 |
|                              | 404310003                               | ,000             | ,000 |
|                              | 404310004                               | ,000             | ,000 |
|                              | 502300005                               | ,000             | ,000 |
|                              | 502300006                               | ,000             | ,000 |
|                              | 502300007                               | ,000             | ,000 |
|                              | 502300214                               | ,000             | ,000 |
|                              | 502300411                               | ,000             | ,000 |
|                              | 502300415                               | ,000             | ,000 |
|                              | 502300416                               | ,000             | ,000 |
|                              | 502300811                               | ,000             | ,000 |
|                              | 502300913                               | ,000             | ,000 |
| weekday veckodag             | 1 måndag                                |                  |      |
|                              | 2 tisdag                                |                  |      |
|                              | 3 onsdag                                |                  |      |
|                              | 4 torsdag                               |                  |      |
|                              | 5 fredag                                |                  |      |
|                              | 6 lördag                                |                  |      |
|                              | 7 söndag                                |                  |      |
| season säsong/period         | 1 januari-mars                          |                  |      |
|                              | 2 april-maj                             |                  |      |
|                              | 3 juni-augusti                          |                  |      |
|                              | 4 september-oktober                     |                  |      |
|                              | 5 november-december                     |                  |      |
| sv3 tredjedelar för standard | 1 andra tredjedelen                     |                  |      |
|                              | 2 första tredjedelen                    |                  |      |
|                              | 3 tredje tredjedelen                    |                  |      |
| holiday större helg          | 1 ingen större helg                     |                  |      |
|                              | 2 större helg (påsk/midsommar/julonyår) |                  |      |



## Categorical Variables Codings

|                              |                                         | Parameter coding |      |
|------------------------------|-----------------------------------------|------------------|------|
|                              |                                         | (20)             | (21) |
|                              | 404060001                               | ,000             | ,000 |
|                              | 404060002                               | ,000             | ,000 |
|                              | 404310003                               | ,000             | ,000 |
|                              | 404310004                               | ,000             | ,000 |
|                              | 502300005                               | ,000             | ,000 |
|                              | 502300006                               | ,000             | ,000 |
|                              | 502300007                               | ,000             | ,000 |
|                              | 502300214                               | ,000             | ,000 |
|                              | 502300411                               | ,000             | ,000 |
|                              | 502300415                               | ,000             | ,000 |
|                              | 502300416                               | ,000             | ,000 |
|                              | 502300811                               | ,000             | ,000 |
|                              | 502300913                               | ,000             | ,000 |
| weekday veckodag             | 1 måndag                                |                  |      |
|                              | 2 tisdag                                |                  |      |
|                              | 3 onsdag                                |                  |      |
|                              | 4 torsdag                               |                  |      |
|                              | 5 fredag                                |                  |      |
|                              | 6 lördag                                |                  |      |
|                              | 7 söndag                                |                  |      |
| season säsong/period         | 1 januari-mars                          |                  |      |
|                              | 2 april-maj                             |                  |      |
|                              | 3 juni-augusti                          |                  |      |
|                              | 4 september-oktober                     |                  |      |
|                              | 5 november-december                     |                  |      |
| sv3 tredjedelar för standard | 1 andra tredjedelen                     |                  |      |
|                              | 2 första tredjedelen                    |                  |      |
|                              | 3 tredje tredjedelen                    |                  |      |
| holiday större helg          | 1 ingen större helg                     |                  |      |
|                              | 2 större helg (påsk/midsommar/julonyår) |                  |      |

## Categorical Variables Codings

|                              |                                         | Parameter coding |       |
|------------------------------|-----------------------------------------|------------------|-------|
|                              |                                         | (22)             | (23)  |
|                              | 404060001                               | ,000             | 1,000 |
|                              | 404060002                               | ,000             | ,000  |
|                              | 404310003                               | ,000             | ,000  |
|                              | 404310004                               | ,000             | ,000  |
|                              | 502300005                               | ,000             | ,000  |
|                              | 502300006                               | ,000             | ,000  |
|                              | 502300007                               | ,000             | ,000  |
|                              | 502300214                               | ,000             | ,000  |
|                              | 502300411                               | ,000             | ,000  |
|                              | 502300415                               | ,000             | ,000  |
|                              | 502300416                               | ,000             | ,000  |
|                              | 502300811                               | ,000             | ,000  |
|                              | 502300913                               | ,000             | ,000  |
| weekday veckodag             | 1 måndag                                |                  |       |
|                              | 2 tisdag                                |                  |       |
|                              | 3 onsdag                                |                  |       |
|                              | 4 torsdag                               |                  |       |
|                              | 5 fredag                                |                  |       |
|                              | 6 lördag                                |                  |       |
|                              | 7 söndag                                |                  |       |
| season säsong/period         | 1 januari-mars                          |                  |       |
|                              | 2 april-maj                             |                  |       |
|                              | 3 juni-augusti                          |                  |       |
|                              | 4 september-oktober                     |                  |       |
|                              | 5 november-december                     |                  |       |
| sv3 tredjedelar för standard | 1 andra tredjedelen                     |                  |       |
|                              | 2 första tredjedelen                    |                  |       |
|                              | 3 tredje tredjedelen                    |                  |       |
| holiday större helg          | 1 ingen större helg                     |                  |       |
|                              | 2 större helg (påsk/midsommar/julonyår) |                  |       |

## Categorical Variables Codings

|                              |                                         | Parameter coding |       |
|------------------------------|-----------------------------------------|------------------|-------|
|                              |                                         | (24)             | (25)  |
|                              | 404060001                               | ,000             | ,000  |
|                              | 404060002                               | 1,000            | ,000  |
|                              | 404310003                               | ,000             | 1,000 |
|                              | 404310004                               | ,000             | ,000  |
|                              | 502300005                               | ,000             | ,000  |
|                              | 502300006                               | ,000             | ,000  |
|                              | 502300007                               | ,000             | ,000  |
|                              | 502300214                               | ,000             | ,000  |
|                              | 502300411                               | ,000             | ,000  |
|                              | 502300415                               | ,000             | ,000  |
|                              | 502300416                               | ,000             | ,000  |
|                              | 502300811                               | ,000             | ,000  |
|                              | 502300913                               | ,000             | ,000  |
| weekday veckodag             | 1 måndag                                |                  |       |
|                              | 2 tisdag                                |                  |       |
|                              | 3 onsdag                                |                  |       |
|                              | 4 torsdag                               |                  |       |
|                              | 5 fredag                                |                  |       |
|                              | 6 lördag                                |                  |       |
|                              | 7 söndag                                |                  |       |
| season säsong/period         | 1 januari-mars                          |                  |       |
|                              | 2 april-maj                             |                  |       |
|                              | 3 juni-augusti                          |                  |       |
|                              | 4 september-oktober                     |                  |       |
|                              | 5 november-december                     |                  |       |
| sv3 tredjedelar för standard | 1 andra tredjedelen                     |                  |       |
|                              | 2 första tredjedelen                    |                  |       |
|                              | 3 tredje tredjedelen                    |                  |       |
| holiday större helg          | 1 ingen större helg                     |                  |       |
|                              | 2 större helg (påsk/midsommar/julonyår) |                  |       |

## Categorical Variables Codings

|                              |                                         | Parameter coding |       |
|------------------------------|-----------------------------------------|------------------|-------|
|                              |                                         | (26)             | (27)  |
|                              | 404060001                               | ,000             | ,000  |
|                              | 404060002                               | ,000             | ,000  |
|                              | 404310003                               | ,000             | ,000  |
|                              | 404310004                               | 1,000            | ,000  |
|                              | 502300005                               | ,000             | 1,000 |
|                              | 502300006                               | ,000             | ,000  |
|                              | 502300007                               | ,000             | ,000  |
|                              | 502300214                               | ,000             | ,000  |
|                              | 502300411                               | ,000             | ,000  |
|                              | 502300415                               | ,000             | ,000  |
|                              | 502300416                               | ,000             | ,000  |
|                              | 502300811                               | ,000             | ,000  |
|                              | 502300913                               | ,000             | ,000  |
| weekday veckodag             | 1 måndag                                |                  |       |
|                              | 2 tisdag                                |                  |       |
|                              | 3 onsdag                                |                  |       |
|                              | 4 torsdag                               |                  |       |
|                              | 5 fredag                                |                  |       |
|                              | 6 lördag                                |                  |       |
|                              | 7 söndag                                |                  |       |
| season säsong/period         | 1 januari-mars                          |                  |       |
|                              | 2 april-maj                             |                  |       |
|                              | 3 juni-augusti                          |                  |       |
|                              | 4 september-oktober                     |                  |       |
|                              | 5 november-december                     |                  |       |
| sv3 tredjedelar för standard | 1 andra tredjedelen                     |                  |       |
|                              | 2 första tredjedelen                    |                  |       |
|                              | 3 tredje tredjedelen                    |                  |       |
| holiday större helg          | 1 ingen större helg                     |                  |       |
|                              | 2 större helg (påsk/midsommar/julonyår) |                  |       |

## Categorical Variables Codings

|                              |                                         | Parameter coding |       |
|------------------------------|-----------------------------------------|------------------|-------|
|                              |                                         | (28)             | (29)  |
|                              | 404060001                               | ,000             | ,000  |
|                              | 404060002                               | ,000             | ,000  |
|                              | 404310003                               | ,000             | ,000  |
|                              | 404310004                               | ,000             | ,000  |
|                              | 502300005                               | ,000             | ,000  |
|                              | 502300006                               | 1,000            | ,000  |
|                              | 502300007                               | ,000             | 1,000 |
|                              | 502300214                               | ,000             | ,000  |
|                              | 502300411                               | ,000             | ,000  |
|                              | 502300415                               | ,000             | ,000  |
|                              | 502300416                               | ,000             | ,000  |
|                              | 502300811                               | ,000             | ,000  |
|                              | 502300913                               | ,000             | ,000  |
| weekday veckodag             | 1 måndag                                |                  |       |
|                              | 2 tisdag                                |                  |       |
|                              | 3 onsdag                                |                  |       |
|                              | 4 torsdag                               |                  |       |
|                              | 5 fredag                                |                  |       |
|                              | 6 lördag                                |                  |       |
|                              | 7 söndag                                |                  |       |
| season säsong/period         | 1 januari-mars                          |                  |       |
|                              | 2 april-maj                             |                  |       |
|                              | 3 juni-augusti                          |                  |       |
|                              | 4 september-oktober                     |                  |       |
|                              | 5 november-december                     |                  |       |
| sv3 tredjedelar för standard | 1 andra tredjedelen                     |                  |       |
|                              | 2 första tredjedelen                    |                  |       |
|                              | 3 tredje tredjedelen                    |                  |       |
| holiday större helg          | 1 ingen större helg                     |                  |       |
|                              | 2 större helg (påsk/midsommar/julonyår) |                  |       |

## Categorical Variables Codings

|                              |                                         | Parameter coding |       |
|------------------------------|-----------------------------------------|------------------|-------|
|                              |                                         | (30)             | (31)  |
|                              | 404060001                               | ,000             | ,000  |
|                              | 404060002                               | ,000             | ,000  |
|                              | 404310003                               | ,000             | ,000  |
|                              | 404310004                               | ,000             | ,000  |
|                              | 502300005                               | ,000             | ,000  |
|                              | 502300006                               | ,000             | ,000  |
|                              | 502300007                               | ,000             | ,000  |
|                              | 502300214                               | 1,000            | ,000  |
|                              | 502300411                               | ,000             | 1,000 |
|                              | 502300415                               | ,000             | ,000  |
|                              | 502300416                               | ,000             | ,000  |
|                              | 502300811                               | ,000             | ,000  |
|                              | 502300913                               | ,000             | ,000  |
| weekday veckodag             | 1 måndag                                |                  |       |
|                              | 2 tisdag                                |                  |       |
|                              | 3 onsdag                                |                  |       |
|                              | 4 torsdag                               |                  |       |
|                              | 5 fredag                                |                  |       |
|                              | 6 lördag                                |                  |       |
|                              | 7 söndag                                |                  |       |
| season säsong/period         | 1 januari-mars                          |                  |       |
|                              | 2 april-maj                             |                  |       |
|                              | 3 juni-augusti                          |                  |       |
|                              | 4 september-oktober                     |                  |       |
|                              | 5 november-december                     |                  |       |
| sv3 tredjedelar för standard | 1 andra tredjedelen                     |                  |       |
|                              | 2 första tredjedelen                    |                  |       |
|                              | 3 tredje tredjedelen                    |                  |       |
| holiday större helg          | 1 ingen större helg                     |                  |       |
|                              | 2 större helg (påsk/midsommar/julonyår) |                  |       |

## Categorical Variables Codings

|                              |                                         | Parameter coding |       |
|------------------------------|-----------------------------------------|------------------|-------|
|                              |                                         | (32)             | (33)  |
|                              | 404060001                               | ,000             | ,000  |
|                              | 404060002                               | ,000             | ,000  |
|                              | 404310003                               | ,000             | ,000  |
|                              | 404310004                               | ,000             | ,000  |
|                              | 502300005                               | ,000             | ,000  |
|                              | 502300006                               | ,000             | ,000  |
|                              | 502300007                               | ,000             | ,000  |
|                              | 502300214                               | ,000             | ,000  |
|                              | 502300411                               | ,000             | ,000  |
|                              | 502300415                               | 1,000            | ,000  |
|                              | 502300416                               | ,000             | 1,000 |
|                              | 502300811                               | ,000             | ,000  |
|                              | 502300913                               | ,000             | ,000  |
| weekday veckodag             | 1 måndag                                |                  |       |
|                              | 2 tisdag                                |                  |       |
|                              | 3 onsdag                                |                  |       |
|                              | 4 torsdag                               |                  |       |
|                              | 5 fredag                                |                  |       |
|                              | 6 lördag                                |                  |       |
|                              | 7 söndag                                |                  |       |
| season säsong/period         | 1 januari-mars                          |                  |       |
|                              | 2 april-maj                             |                  |       |
|                              | 3 juni-augusti                          |                  |       |
|                              | 4 september-oktober                     |                  |       |
|                              | 5 november-december                     |                  |       |
| sv3 tredjedelar för standard | 1 andra tredjedelen                     |                  |       |
|                              | 2 första tredjedelen                    |                  |       |
|                              | 3 tredje tredjedelen                    |                  |       |
| holiday större helg          | 1 ingen större helg                     |                  |       |
|                              | 2 större helg (påsk/midsommar/julonyår) |                  |       |

## Categorical Variables Codings

|                              |                                         | Parameter coding |       |
|------------------------------|-----------------------------------------|------------------|-------|
|                              |                                         | (34)             | (35)  |
|                              | 404060001                               | ,000             | ,000  |
|                              | 404060002                               | ,000             | ,000  |
|                              | 404310003                               | ,000             | ,000  |
|                              | 404310004                               | ,000             | ,000  |
|                              | 502300005                               | ,000             | ,000  |
|                              | 502300006                               | ,000             | ,000  |
|                              | 502300007                               | ,000             | ,000  |
|                              | 502300214                               | ,000             | ,000  |
|                              | 502300411                               | ,000             | ,000  |
|                              | 502300415                               | ,000             | ,000  |
|                              | 502300416                               | ,000             | ,000  |
|                              | 502300811                               | 1,000            | ,000  |
|                              | 502300913                               | ,000             | 1,000 |
| weekday veckodag             | 1 måndag                                |                  |       |
|                              | 2 tisdag                                |                  |       |
|                              | 3 onsdag                                |                  |       |
|                              | 4 torsdag                               |                  |       |
|                              | 5 fredag                                |                  |       |
|                              | 6 lördag                                |                  |       |
|                              | 7 söndag                                |                  |       |
| season säsong/period         | 1 januari-mars                          |                  |       |
|                              | 2 april-maj                             |                  |       |
|                              | 3 juni-augusti                          |                  |       |
|                              | 4 september-oktober                     |                  |       |
|                              | 5 november-december                     |                  |       |
| sv3 tredjedelar för standard | 1 andra tredjedelen                     |                  |       |
|                              | 2 första tredjedelen                    |                  |       |
|                              | 3 tredje tredjedelen                    |                  |       |
| holiday större helg          | 1 ingen större helg                     |                  |       |
|                              | 2 större helg (påsk/midsommar/julonyår) |                  |       |

**Block 0: Beginning Block**



Classification Table<sup>a,b</sup>

| Observed           |                              |                     | Predicted                    |                     |
|--------------------|------------------------------|---------------------|------------------------------|---------------------|
|                    |                              |                     | hand01 händelse nej eller ja |                     |
|                    |                              |                     | 0 ingen händelse             | 1 minst en händelse |
| Step 0             | hand01 händelse nej eller ja | 0 ingen händelse    | 11108                        | 0                   |
|                    |                              | 1 minst en händelse | 1367                         | 0                   |
| Overall Percentage |                              |                     |                              |                     |

Classification Table<sup>a,b</sup>

| Observed           |                              |                     | Predicted          |
|--------------------|------------------------------|---------------------|--------------------|
|                    |                              |                     | Percentage Correct |
| Step 0             | hand01 händelse nej eller ja | 0 ingen händelse    | 100,0              |
|                    |                              | 1 minst en händelse | ,0                 |
| Overall Percentage |                              |                     | 89,0               |

a. Constant is included in the model.

b. The cut value is ,500

Variables in the Equation

|                 | B      | S.E. | Wald     | df | Sig. | Exp(B) |
|-----------------|--------|------|----------|----|------|--------|
| Step 0 Constant | -2,095 | ,029 | 5342,584 | 1  | ,000 | ,123   |

## Variables not in the Equation

|        |           |            | Score   | df | Sig. |
|--------|-----------|------------|---------|----|------|
| Step 0 | Variables | sv3        | 33,743  | 2  | ,000 |
|        |           | sv3(1)     | 32,193  | 1  | ,000 |
|        |           | sv3(2)     | 19,134  | 1  | ,000 |
|        |           | VASTY2     | 541,214 | 35 | ,000 |
|        |           | VASTY2(1)  | 1,169   | 1  | ,280 |
|        |           | VASTY2(2)  | 87,511  | 1  | ,000 |
|        |           | VASTY2(3)  | 13,995  | 1  | ,000 |
|        |           | VASTY2(4)  | ,464    | 1  | ,496 |
|        |           | VASTY2(5)  | 5,526   | 1  | ,019 |
|        |           | VASTY2(6)  | 19,435  | 1  | ,000 |
|        |           | VASTY2(7)  | 86,074  | 1  | ,000 |
|        |           | VASTY2(8)  | 1,043   | 1  | ,307 |
|        |           | VASTY2(9)  | ,408    | 1  | ,523 |
|        |           | VASTY2(10) | 58,583  | 1  | ,000 |
|        |           | VASTY2(11) | 33,445  | 1  | ,000 |
|        |           | VASTY2(12) | ,029    | 1  | ,865 |
|        |           | VASTY2(13) | 33,445  | 1  | ,000 |
|        |           | VASTY2(14) | 4,163   | 1  | ,041 |
|        |           | VASTY2(15) | ,464    | 1  | ,496 |
|        |           | VASTY2(16) | ,763    | 1  | ,382 |
|        |           | VASTY2(17) | 24,320  | 1  | ,000 |
|        |           | VASTY2(18) | 17,742  | 1  | ,000 |
|        |           | VASTY2(19) | 27,791  | 1  | ,000 |
|        |           | VASTY2(20) | ,015    | 1  | ,902 |
|        |           | VASTY2(21) | 2,890   | 1  | ,089 |
|        |           | VASTY2(22) | ,462    | 1  | ,497 |
|        |           | VASTY2(23) | 15,306  | 1  | ,000 |
|        |           | VASTY2(24) | 12,594  | 1  | ,000 |
|        |           | VASTY2(25) | ,128    | 1  | ,720 |
|        |           | VASTY2(26) | 12,864  | 1  | ,000 |
|        |           | VASTY2(27) | 24,439  | 1  | ,000 |
|        |           | VASTY2(28) | 9,963   | 1  | ,002 |
|        |           | VASTY2(29) | 18,184  | 1  | ,000 |
|        |           | VASTY2(30) | ,486    | 1  | ,486 |
|        |           | VASTY2(31) | 6,400   | 1  | ,011 |
|        |           | VASTY2(32) | 1,626   | 1  | ,202 |
|        |           | VASTY2(33) | 1,336   | 1  | ,248 |
|        |           | VASTY2(34) | 29,489  | 1  | ,000 |
|        |           | VASTY2(35) | 3,668   | 1  | ,055 |
|        |           | weekday    | 20,834  | 6  | ,002 |
|        |           | weekday(1) | ,196    | 1  | ,658 |
|        |           | weekday(2) | ,004    | 1  | ,951 |
|        |           | weekday(3) | 1,386   | 1  | ,239 |

## Variables not in the Equation

|                    | Score   | df | Sig. |
|--------------------|---------|----|------|
| weekday(4)         | ,820    | 1  | ,365 |
| weekday(5)         | 20,097  | 1  | ,000 |
| weekday(6)         | 1,022   | 1  | ,312 |
| holiday(1)         | 4,862   | 1  | ,027 |
| season             | 15,673  | 4  | ,003 |
| season(1)          | ,214    | 1  | ,643 |
| season(2)          | 8,095   | 1  | ,004 |
| season(3)          | 10,213  | 1  | ,001 |
| season(4)          | ,313    | 1  | ,576 |
| Overall Statistics | 593,297 | 48 | ,000 |

## Block 1: Method = Enter

## Omnibus Tests of Model Coefficients

|             | Chi-square | df | Sig. |
|-------------|------------|----|------|
| Step 1 Step | 593,799    | 48 | ,000 |
| Block       | 593,799    | 48 | ,000 |
| Model       | 593,799    | 48 | ,000 |

## Model Summary

| Step | -2 Log likelihood     | Cox & Snell R Square | Nagelkerke R Square |
|------|-----------------------|----------------------|---------------------|
| 1    | 8029,783 <sup>a</sup> | ,046                 | ,093                |

a. Estimation terminated at iteration number 6 because parameter estimates changed by less than ,001.

Classification Table<sup>a</sup>

| Observed           |                              | Predicted                    |                  |                     |
|--------------------|------------------------------|------------------------------|------------------|---------------------|
|                    |                              | hand01 hændelse nej eller ja | 0 ingen hændelse | 1 minst en hændelse |
| Step 1             | hand01 hændelse nej eller ja | 0 ingen hændelse             | 11108            | 0                   |
|                    |                              | 1 minst en hændelse          | 1367             | 0                   |
| Overall Percentage |                              |                              |                  |                     |

Classification Table<sup>a</sup>

| Observed           |                              | Predicted          |
|--------------------|------------------------------|--------------------|
|                    |                              | Percentage Correct |
| Step 1             | hand01 hændelse nej eller ja | 100,0              |
|                    |                              | ,0                 |
| Overall Percentage |                              | 89,0               |

a. The cut value is ,500

**Variables in the Equation**

|                     |            | B      | S.E. | Wald    | df | Sig. | Exp(B) |
|---------------------|------------|--------|------|---------|----|------|--------|
| Step 1 <sup>a</sup> | sv3        |        |      | 6,576   | 2  | ,037 |        |
|                     | sv3(1)     | -,121  | ,086 | 1,964   | 1  | ,161 | ,886   |
|                     | sv3(2)     | ,121   | ,084 | 2,074   | 1  | ,150 | 1,128  |
|                     | VASTY2     |        |      | 437,718 | 35 | ,000 |        |
|                     | VASTY2(1)  | ,315   | ,241 | 1,713   | 1  | ,191 | 1,371  |
|                     | VASTY2(2)  | 1,154  | ,220 | 27,492  | 1  | ,000 | 3,169  |
|                     | VASTY2(3)  | -,655  | ,302 | 4,706   | 1  | ,030 | ,519   |
|                     | VASTY2(4)  | ,310   | ,242 | 1,641   | 1  | ,200 | 1,364  |
|                     | VASTY2(5)  | -,264  | ,283 | ,869    | 1  | ,351 | ,768   |
|                     | VASTY2(6)  | -1,049 | ,331 | 10,057  | 1  | ,002 | ,350   |
|                     | VASTY2(7)  | 1,260  | ,217 | 33,606  | 1  | ,000 | 3,524  |
|                     | VASTY2(8)  | ,389   | ,241 | 2,613   | 1  | ,106 | 1,476  |
|                     | VASTY2(9)  | ,275   | ,246 | 1,251   | 1  | ,263 | 1,317  |
|                     | VASTY2(10) | ,990   | ,224 | 19,591  | 1  | ,000 | 2,692  |
|                     | VASTY2(11) | ,917   | ,223 | 16,909  | 1  | ,000 | 2,501  |
|                     | VASTY2(12) | ,070   | ,251 | ,077    | 1  | ,781 | 1,072  |
|                     | VASTY2(13) | ,804   | ,228 | 12,431  | 1  | ,000 | 2,235  |
|                     | VASTY2(14) | -,272  | ,269 | 1,022   | 1  | ,312 | ,762   |
|                     | VASTY2(15) | ,202   | ,245 | ,676    | 1  | ,411 | 1,223  |
|                     | VASTY2(16) | ,271   | ,289 | ,882    | 1  | ,348 | 1,312  |
|                     | VASTY2(17) | -1,163 | ,356 | 10,679  | 1  | ,001 | ,312   |
|                     | VASTY2(18) | -,747  | ,325 | 5,276   | 1  | ,022 | ,474   |
|                     | VASTY2(19) | -1,284 | ,387 | 10,981  | 1  | ,001 | ,277   |
|                     | VASTY2(20) | ,057   | ,262 | ,048    | 1  | ,827 | 1,059  |
|                     | VASTY2(21) | -,104  | ,263 | ,156    | 1  | ,692 | ,901   |
|                     | VASTY2(22) | ,062   | ,252 | ,061    | 1  | ,805 | 1,064  |
|                     | VASTY2(23) | ,713   | ,228 | 9,763   | 1  | ,002 | 2,039  |
|                     | VASTY2(24) | ,614   | ,229 | 7,163   | 1  | ,007 | 1,848  |
|                     | VASTY2(25) | ,115   | ,265 | ,187    | 1  | ,665 | 1,122  |
|                     | VASTY2(26) | -,845  | ,337 | 6,302   | 1  | ,012 | ,429   |
|                     | VASTY2(27) | -1,286 | ,357 | 12,973  | 1  | ,000 | ,276   |
|                     | VASTY2(28) | -,974  | ,375 | 6,762   | 1  | ,009 | ,378   |
|                     | VASTY2(29) | -1,019 | ,325 | 9,861   | 1  | ,002 | ,361   |
|                     | VASTY2(30) | ,090   | ,253 | ,125    | 1  | ,723 | 1,094  |
|                     | VASTY2(31) | ,632   | ,238 | 7,037   | 1  | ,008 | 1,882  |
|                     | VASTY2(32) | ,045   | ,266 | ,028    | 1  | ,867 | 1,046  |
|                     | VASTY2(33) | ,075   | ,264 | ,080    | 1  | ,777 | 1,078  |
|                     | VASTY2(34) | -1,540 | ,401 | 14,764  | 1  | ,000 | ,214   |
|                     | VASTY2(35) | ,432   | ,243 | 3,170   | 1  | ,075 | 1,541  |
|                     | weekday    |        |      | 19,432  | 6  | ,003 |        |

Variables in the Equation

|                     |            | 95% C.I. for EXP(B) |       |
|---------------------|------------|---------------------|-------|
|                     |            | Lower               | Upper |
| Step 1 <sup>a</sup> | sv3        |                     |       |
|                     | sv3(1)     | ,749                | 1,049 |
|                     | sv3(2)     | ,957                | 1,329 |
|                     | VASTY2     |                     |       |
|                     | VASTY2(1)  | ,855                | 2,198 |
|                     | VASTY2(2)  | 2,059               | 4,878 |
|                     | VASTY2(3)  | ,287                | ,939  |
|                     | VASTY2(4)  | ,848                | 2,193 |
|                     | VASTY2(5)  | ,441                | 1,338 |
|                     | VASTY2(6)  | ,183                | ,670  |
|                     | VASTY2(7)  | 2,302               | 5,394 |
|                     | VASTY2(8)  | ,921                | 2,365 |
|                     | VASTY2(9)  | ,813                | 2,132 |
|                     | VASTY2(10) | 1,736               | 4,174 |
|                     | VASTY2(11) | 1,616               | 3,872 |
|                     | VASTY2(12) | ,656                | 1,752 |
|                     | VASTY2(13) | 1,429               | 3,495 |
|                     | VASTY2(14) | ,450                | 1,290 |
|                     | VASTY2(15) | ,756                | 1,979 |
|                     | VASTY2(16) | ,745                | 2,311 |
|                     | VASTY2(17) | ,155                | ,628  |
|                     | VASTY2(18) | ,251                | ,896  |
|                     | VASTY2(19) | ,130                | ,592  |
|                     | VASTY2(20) | ,634                | 1,769 |
|                     | VASTY2(21) | ,538                | 1,509 |
|                     | VASTY2(22) | ,649                | 1,744 |
|                     | VASTY2(23) | 1,304               | 3,189 |
|                     | VASTY2(24) | 1,179               | 2,897 |
|                     | VASTY2(25) | ,667                | 1,887 |
|                     | VASTY2(26) | ,222                | ,831  |
|                     | VASTY2(27) | ,137                | ,556  |
|                     | VASTY2(28) | ,181                | ,787  |
|                     | VASTY2(29) | ,191                | ,682  |
|                     | VASTY2(30) | ,666                | 1,796 |
|                     | VASTY2(31) | 1,180               | 3,003 |
|                     | VASTY2(32) | ,621                | 1,760 |
|                     | VASTY2(33) | ,643                | 1,808 |
|                     | VASTY2(34) | ,098                | ,470  |
|                     | VASTY2(35) | ,957                | 2,481 |
|                     | weekday    |                     |       |

review only

Variables in the Equation

|            | B      | S.E. | Wald    | df | Sig. | Exp(B) |
|------------|--------|------|---------|----|------|--------|
| weekday(1) | -,029  | ,107 | ,073    | 1  | ,787 | ,971   |
| weekday(2) | -,059  | ,108 | ,293    | 1  | ,588 | ,943   |
| weekday(3) | ,025   | ,107 | ,056    | 1  | ,814 | 1,025  |
| weekday(4) | ,028   | ,107 | ,070    | 1  | ,791 | 1,029  |
| weekday(5) | -,411  | ,119 | 11,974  | 1  | ,001 | ,663   |
| weekday(6) | ,034   | ,108 | ,100    | 1  | ,752 | 1,035  |
| holiday(1) | -,478  | ,201 | 5,647   | 1  | ,017 | ,620   |
| season     |        |      | 15,282  | 4  | ,004 |        |
| season(1)  | -,084  | ,092 | ,827    | 1  | ,363 | ,920   |
| season(2)  | -,207  | ,088 | 5,579   | 1  | ,018 | ,813   |
| season(3)  | ,147   | ,088 | 2,796   | 1  | ,095 | 1,158  |
| season(4)  | -,040  | ,093 | ,184    | 1  | ,668 | ,961   |
| Constant   | -2,163 | ,204 | 112,859 | 1  | ,000 | ,115   |

Variables in the Equation

|            | 95% C.I. for EXP(B) |       |
|------------|---------------------|-------|
|            | Lower               | Upper |
| weekday(1) | ,787                | 1,199 |
| weekday(2) | ,763                | 1,166 |
| weekday(3) | ,832                | 1,264 |
| weekday(4) | ,834                | 1,270 |
| weekday(5) | ,525                | ,837  |
| weekday(6) | ,837                | 1,279 |
| holiday(1) | ,418                | ,920  |
| season     |                     |       |
| season(1)  | ,768                | 1,102 |
| season(2)  | ,685                | ,965  |
| season(3)  | ,975                | 1,376 |
| season(4)  | ,800                | 1,153 |
| Constant   |                     |       |

a. Variable(s) entered on step 1: sv3, VASTY2, weekday, holiday, season.

LOGISTIC REGRESSION VARIABLES hand01

/METHOD=ENTER sv5 VASTY2 weekday holiday season

/CONTRAST (sv5)=Indicator(1)

/CONTRAST (VASTY2)=Indicator(1)

/CONTRAST (weekday)=Indicator(1)

/CONTRAST (holiday)=Indicator(1)

/CONTRAST (season)=Indicator(1)

/PRINT=CI(95)

/CRITERIA=PIN(0.05) POUT(0.10) ITERATE(20) CUT(0.5).

## Logistic Regression

[DataSet6] C:\cWordjan\Rafaela\_VCS\alla\_tillsammans\abo\_bjo\_vasa\_v1.sav

### Case Processing Summary

| Unweighted Cases <sup>a</sup> |                      | N     | Percent |
|-------------------------------|----------------------|-------|---------|
| Selected Cases                | Included in Analysis | 12475 | 100,0   |
|                               | Missing Cases        | 0     | ,0      |
|                               | Total                | 12475 | 100,0   |
| Unselected Cases              |                      | 0     | ,0      |
| Total                         |                      | 12475 | 100,0   |

a. If weight is in effect, see classification table for the total number of cases.

### Dependent Variable Encoding

| Original Value      | Internal Value |
|---------------------|----------------|
| 0 ingen händelse    | 0              |
| 1 minst en händelse | 1              |

### Categorical Variables Codings

|                           |           | Frequency | Parameter<br>(1) |
|---------------------------|-----------|-----------|------------------|
| VASTY2 (SAIR*10000)+VASTY | 403073101 | 365       | ,000             |
|                           | 403073102 | 362       | 1,000            |
|                           | 403073103 | 365       | ,000             |
|                           | 403073202 | 365       | ,000             |
|                           | 403073203 | 365       | ,000             |
|                           | 403073204 | 330       | ,000             |
|                           | 403073303 | 364       | ,000             |
|                           | 403073651 | 362       | ,000             |
|                           | 403073771 | 365       | ,000             |
|                           | 403133102 | 341       | ,000             |
|                           | 403133106 | 365       | ,000             |
|                           | 403133107 | 365       | ,000             |
|                           | 403133109 | 365       | ,000             |
|                           | 403133202 | 365       | ,000             |
|                           | 403133203 | 365       | ,000             |
|                           | 403133204 | 365       | ,000             |
|                           | 403133315 | 177       | ,000             |
|                           | 403133322 | 365       | ,000             |
|                           | 403133401 | 362       | ,000             |
|                           | 403133402 | 365       | ,000             |
| 403133550                 | 298       | ,000      |                  |
| 403133772                 | 365       | ,000      |                  |
| 403135803                 | 365       | ,000      |                  |

## Categorical Variables Codings

|                           |           | Parameter coding |       |
|---------------------------|-----------|------------------|-------|
|                           |           | (2)              | (3)   |
| VASTY2 (SAIR*10000)+VASTY | 403073101 | ,000             | ,000  |
|                           | 403073102 | ,000             | ,000  |
|                           | 403073103 | 1,000            | ,000  |
|                           | 403073202 | ,000             | 1,000 |
|                           | 403073203 | ,000             | ,000  |
|                           | 403073204 | ,000             | ,000  |
|                           | 403073303 | ,000             | ,000  |
|                           | 403073651 | ,000             | ,000  |
|                           | 403073771 | ,000             | ,000  |
|                           | 403133102 | ,000             | ,000  |
|                           | 403133106 | ,000             | ,000  |
|                           | 403133107 | ,000             | ,000  |
|                           | 403133109 | ,000             | ,000  |
|                           | 403133202 | ,000             | ,000  |
|                           | 403133203 | ,000             | ,000  |
|                           | 403133204 | ,000             | ,000  |
|                           | 403133315 | ,000             | ,000  |
|                           | 403133322 | ,000             | ,000  |
|                           | 403133401 | ,000             | ,000  |
|                           | 403133402 | ,000             | ,000  |
|                           | 403133550 | ,000             | ,000  |
|                           | 403133772 | ,000             | ,000  |
|                           | 403135803 | ,000             | ,000  |



1  
2  
3  
4  
5  
6  
7  
8  
9  
10  
11  
12  
13  
14  
15  
16  
17  
18  
19  
20  
21  
22  
23  
24  
25  
26  
27  
28  
29  
30  
31  
32  
33  
34  
35  
36  
37  
38  
39  
40  
41  
42  
43  
44  
45  
46  
47  
48  
49  
50  
51  
52  
53  
54  
55  
56  
57  
58  
59  
60

**Categorical Variables Codings**

|                           |           | Parameter coding |       |
|---------------------------|-----------|------------------|-------|
|                           |           | (4)              | (5)   |
| VASTY2 (SAIR*10000)+VASTY | 403073101 | ,000             | ,000  |
|                           | 403073102 | ,000             | ,000  |
|                           | 403073103 | ,000             | ,000  |
|                           | 403073202 | ,000             | ,000  |
|                           | 403073203 | 1,000            | ,000  |
|                           | 403073204 | ,000             | 1,000 |
|                           | 403073303 | ,000             | ,000  |
|                           | 403073651 | ,000             | ,000  |
|                           | 403073771 | ,000             | ,000  |
|                           | 403133102 | ,000             | ,000  |
|                           | 403133106 | ,000             | ,000  |
|                           | 403133107 | ,000             | ,000  |
|                           | 403133109 | ,000             | ,000  |
|                           | 403133202 | ,000             | ,000  |
|                           | 403133203 | ,000             | ,000  |
|                           | 403133204 | ,000             | ,000  |
|                           | 403133315 | ,000             | ,000  |
|                           | 403133322 | ,000             | ,000  |
|                           | 403133401 | ,000             | ,000  |
|                           | 403133402 | ,000             | ,000  |
|                           | 403133550 | ,000             | ,000  |
|                           | 403133772 | ,000             | ,000  |
|                           | 403135803 | ,000             | ,000  |

Peer Review Only

## Categorical Variables Codings

|                           |           | Parameter coding |       |
|---------------------------|-----------|------------------|-------|
|                           |           | (6)              | (7)   |
| VASTY2 (SAIR*10000)+VASTY | 403073101 | ,000             | ,000  |
|                           | 403073102 | ,000             | ,000  |
|                           | 403073103 | ,000             | ,000  |
|                           | 403073202 | ,000             | ,000  |
|                           | 403073203 | ,000             | ,000  |
|                           | 403073204 | ,000             | ,000  |
|                           | 403073303 | 1,000            | ,000  |
|                           | 403073651 | ,000             | 1,000 |
|                           | 403073771 | ,000             | ,000  |
|                           | 403133102 | ,000             | ,000  |
|                           | 403133106 | ,000             | ,000  |
|                           | 403133107 | ,000             | ,000  |
|                           | 403133109 | ,000             | ,000  |
|                           | 403133202 | ,000             | ,000  |
|                           | 403133203 | ,000             | ,000  |
|                           | 403133204 | ,000             | ,000  |
|                           | 403133315 | ,000             | ,000  |
|                           | 403133322 | ,000             | ,000  |
|                           | 403133401 | ,000             | ,000  |
|                           | 403133402 | ,000             | ,000  |
|                           | 403133550 | ,000             | ,000  |
|                           | 403133772 | ,000             | ,000  |
|                           | 403135803 | ,000             | ,000  |

## Categorical Variables Codings

|                           |           | Parameter coding |       |
|---------------------------|-----------|------------------|-------|
|                           |           | (8)              | (9)   |
| VASTY2 (SAIR*10000)+VASTY | 403073101 | ,000             | ,000  |
|                           | 403073102 | ,000             | ,000  |
|                           | 403073103 | ,000             | ,000  |
|                           | 403073202 | ,000             | ,000  |
|                           | 403073203 | ,000             | ,000  |
|                           | 403073204 | ,000             | ,000  |
|                           | 403073303 | ,000             | ,000  |
|                           | 403073651 | ,000             | ,000  |
|                           | 403073771 | 1,000            | ,000  |
|                           | 403133102 | ,000             | 1,000 |
|                           | 403133106 | ,000             | ,000  |
|                           | 403133107 | ,000             | ,000  |
|                           | 403133109 | ,000             | ,000  |
|                           | 403133202 | ,000             | ,000  |
|                           | 403133203 | ,000             | ,000  |
|                           | 403133204 | ,000             | ,000  |
|                           | 403133315 | ,000             | ,000  |
|                           | 403133322 | ,000             | ,000  |
|                           | 403133401 | ,000             | ,000  |
|                           | 403133402 | ,000             | ,000  |
|                           | 403133550 | ,000             | ,000  |
|                           | 403133772 | ,000             | ,000  |
|                           | 403135803 | ,000             | ,000  |

## Categorical Variables Codings

|                           |           | Parameter coding |       |
|---------------------------|-----------|------------------|-------|
|                           |           | (10)             | (11)  |
| VASTY2 (SAIR*10000)+VASTY | 403073101 | ,000             | ,000  |
|                           | 403073102 | ,000             | ,000  |
|                           | 403073103 | ,000             | ,000  |
|                           | 403073202 | ,000             | ,000  |
|                           | 403073203 | ,000             | ,000  |
|                           | 403073204 | ,000             | ,000  |
|                           | 403073303 | ,000             | ,000  |
|                           | 403073651 | ,000             | ,000  |
|                           | 403073771 | ,000             | ,000  |
|                           | 403133102 | ,000             | ,000  |
|                           | 403133106 | 1,000            | ,000  |
|                           | 403133107 | ,000             | 1,000 |
|                           | 403133109 | ,000             | ,000  |
|                           | 403133202 | ,000             | ,000  |
|                           | 403133203 | ,000             | ,000  |
|                           | 403133204 | ,000             | ,000  |
|                           | 403133315 | ,000             | ,000  |
|                           | 403133322 | ,000             | ,000  |
|                           | 403133401 | ,000             | ,000  |
|                           | 403133402 | ,000             | ,000  |
|                           | 403133550 | ,000             | ,000  |
|                           | 403133772 | ,000             | ,000  |
|                           | 403135803 | ,000             | ,000  |

## Categorical Variables Codings

|                           |           | Parameter coding |       |
|---------------------------|-----------|------------------|-------|
|                           |           | (12)             | (13)  |
| VASTY2 (SAIR*10000)+VASTY | 403073101 | ,000             | ,000  |
|                           | 403073102 | ,000             | ,000  |
|                           | 403073103 | ,000             | ,000  |
|                           | 403073202 | ,000             | ,000  |
|                           | 403073203 | ,000             | ,000  |
|                           | 403073204 | ,000             | ,000  |
|                           | 403073303 | ,000             | ,000  |
|                           | 403073651 | ,000             | ,000  |
|                           | 403073771 | ,000             | ,000  |
|                           | 403133102 | ,000             | ,000  |
|                           | 403133106 | ,000             | ,000  |
|                           | 403133107 | ,000             | ,000  |
|                           | 403133109 | 1,000            | ,000  |
|                           | 403133202 | ,000             | 1,000 |
|                           | 403133203 | ,000             | ,000  |
|                           | 403133204 | ,000             | ,000  |
|                           | 403133315 | ,000             | ,000  |
|                           | 403133322 | ,000             | ,000  |
|                           | 403133401 | ,000             | ,000  |
|                           | 403133402 | ,000             | ,000  |
|                           | 403133550 | ,000             | ,000  |
|                           | 403133772 | ,000             | ,000  |
|                           | 403135803 | ,000             | ,000  |

## Categorical Variables Codings

|                           |           | Parameter coding |       |
|---------------------------|-----------|------------------|-------|
|                           |           | (14)             | (15)  |
| VASTY2 (SAIR*10000)+VASTY | 403073101 | ,000             | ,000  |
|                           | 403073102 | ,000             | ,000  |
|                           | 403073103 | ,000             | ,000  |
|                           | 403073202 | ,000             | ,000  |
|                           | 403073203 | ,000             | ,000  |
|                           | 403073204 | ,000             | ,000  |
|                           | 403073303 | ,000             | ,000  |
|                           | 403073651 | ,000             | ,000  |
|                           | 403073771 | ,000             | ,000  |
|                           | 403133102 | ,000             | ,000  |
|                           | 403133106 | ,000             | ,000  |
|                           | 403133107 | ,000             | ,000  |
|                           | 403133109 | ,000             | ,000  |
|                           | 403133202 | ,000             | ,000  |
|                           | 403133203 | 1,000            | ,000  |
|                           | 403133204 | ,000             | 1,000 |
|                           | 403133315 | ,000             | ,000  |
|                           | 403133322 | ,000             | ,000  |
|                           | 403133401 | ,000             | ,000  |
|                           | 403133402 | ,000             | ,000  |
|                           | 403133550 | ,000             | ,000  |
|                           | 403133772 | ,000             | ,000  |
|                           | 403135803 | ,000             | ,000  |

**Categorical Variables Codings**

|                           |           | Parameter coding |       |
|---------------------------|-----------|------------------|-------|
|                           |           | (16)             | (17)  |
| VASTY2 (SAIR*10000)+VASTY | 403073101 | ,000             | ,000  |
|                           | 403073102 | ,000             | ,000  |
|                           | 403073103 | ,000             | ,000  |
|                           | 403073202 | ,000             | ,000  |
|                           | 403073203 | ,000             | ,000  |
|                           | 403073204 | ,000             | ,000  |
|                           | 403073303 | ,000             | ,000  |
|                           | 403073651 | ,000             | ,000  |
|                           | 403073771 | ,000             | ,000  |
|                           | 403133102 | ,000             | ,000  |
|                           | 403133106 | ,000             | ,000  |
|                           | 403133107 | ,000             | ,000  |
|                           | 403133109 | ,000             | ,000  |
|                           | 403133202 | ,000             | ,000  |
|                           | 403133203 | ,000             | ,000  |
|                           | 403133204 | ,000             | ,000  |
|                           | 403133315 | 1,000            | ,000  |
|                           | 403133322 | ,000             | 1,000 |
|                           | 403133401 | ,000             | ,000  |
|                           | 403133402 | ,000             | ,000  |
|                           | 403133550 | ,000             | ,000  |
|                           | 403133772 | ,000             | ,000  |
|                           | 403135803 | ,000             | ,000  |

Peer Review Only

## Categorical Variables Codings

|                           |           | Parameter coding |       |
|---------------------------|-----------|------------------|-------|
|                           |           | (18)             | (19)  |
| VASTY2 (SAIR*10000)+VASTY | 403073101 | ,000             | ,000  |
|                           | 403073102 | ,000             | ,000  |
|                           | 403073103 | ,000             | ,000  |
|                           | 403073202 | ,000             | ,000  |
|                           | 403073203 | ,000             | ,000  |
|                           | 403073204 | ,000             | ,000  |
|                           | 403073303 | ,000             | ,000  |
|                           | 403073651 | ,000             | ,000  |
|                           | 403073771 | ,000             | ,000  |
|                           | 403133102 | ,000             | ,000  |
|                           | 403133106 | ,000             | ,000  |
|                           | 403133107 | ,000             | ,000  |
|                           | 403133109 | ,000             | ,000  |
|                           | 403133202 | ,000             | ,000  |
|                           | 403133203 | ,000             | ,000  |
|                           | 403133204 | ,000             | ,000  |
|                           | 403133315 | ,000             | ,000  |
|                           | 403133322 | ,000             | ,000  |
|                           | 403133401 | 1,000            | ,000  |
|                           | 403133402 | ,000             | 1,000 |
|                           | 403133550 | ,000             | ,000  |
|                           | 403133772 | ,000             | ,000  |
|                           | 403135803 | ,000             | ,000  |



**Categorical Variables Codings**

|                           |           | Parameter coding |       |
|---------------------------|-----------|------------------|-------|
|                           |           | (20)             | (21)  |
| VASTY2 (SAIR*10000)+VASTY | 403073101 | ,000             | ,000  |
|                           | 403073102 | ,000             | ,000  |
|                           | 403073103 | ,000             | ,000  |
|                           | 403073202 | ,000             | ,000  |
|                           | 403073203 | ,000             | ,000  |
|                           | 403073204 | ,000             | ,000  |
|                           | 403073303 | ,000             | ,000  |
|                           | 403073651 | ,000             | ,000  |
|                           | 403073771 | ,000             | ,000  |
|                           | 403133102 | ,000             | ,000  |
|                           | 403133106 | ,000             | ,000  |
|                           | 403133107 | ,000             | ,000  |
|                           | 403133109 | ,000             | ,000  |
|                           | 403133202 | ,000             | ,000  |
|                           | 403133203 | ,000             | ,000  |
|                           | 403133204 | ,000             | ,000  |
|                           | 403133315 | ,000             | ,000  |
|                           | 403133322 | ,000             | ,000  |
|                           | 403133401 | ,000             | ,000  |
|                           | 403133402 | ,000             | ,000  |
|                           | 403133550 | 1,000            | ,000  |
|                           | 403133772 | ,000             | 1,000 |
|                           | 403135803 | ,000             | ,000  |

Peer Review Only

## Categorical Variables Codings

|                           |           | Parameter coding |      |
|---------------------------|-----------|------------------|------|
|                           |           | (22)             | (23) |
| VASTY2 (SAIR*10000)+VASTY | 403073101 | ,000             | ,000 |
|                           | 403073102 | ,000             | ,000 |
|                           | 403073103 | ,000             | ,000 |
|                           | 403073202 | ,000             | ,000 |
|                           | 403073203 | ,000             | ,000 |
|                           | 403073204 | ,000             | ,000 |
|                           | 403073303 | ,000             | ,000 |
|                           | 403073651 | ,000             | ,000 |
|                           | 403073771 | ,000             | ,000 |
|                           | 403133102 | ,000             | ,000 |
|                           | 403133106 | ,000             | ,000 |
|                           | 403133107 | ,000             | ,000 |
|                           | 403133109 | ,000             | ,000 |
|                           | 403133202 | ,000             | ,000 |
|                           | 403133203 | ,000             | ,000 |
|                           | 403133204 | ,000             | ,000 |
|                           | 403133315 | ,000             | ,000 |
|                           | 403133322 | ,000             | ,000 |
|                           | 403133401 | ,000             | ,000 |
|                           | 403133402 | ,000             | ,000 |
|                           | 403133550 | ,000             | ,000 |
|                           | 403133772 | ,000             | ,000 |
|                           | 403135803 | 1,000            | ,000 |

**Categorical Variables Codings**

|                           |           | Parameter coding |      |
|---------------------------|-----------|------------------|------|
|                           |           | (24)             | (25) |
| VASTY2 (SAIR*10000)+VASTY | 403073101 | ,000             | ,000 |
|                           | 403073102 | ,000             | ,000 |
|                           | 403073103 | ,000             | ,000 |
|                           | 403073202 | ,000             | ,000 |
|                           | 403073203 | ,000             | ,000 |
|                           | 403073204 | ,000             | ,000 |
|                           | 403073303 | ,000             | ,000 |
|                           | 403073651 | ,000             | ,000 |
|                           | 403073771 | ,000             | ,000 |
|                           | 403133102 | ,000             | ,000 |
|                           | 403133106 | ,000             | ,000 |
|                           | 403133107 | ,000             | ,000 |
|                           | 403133109 | ,000             | ,000 |
|                           | 403133202 | ,000             | ,000 |
|                           | 403133203 | ,000             | ,000 |
|                           | 403133204 | ,000             | ,000 |
|                           | 403133315 | ,000             | ,000 |
|                           | 403133322 | ,000             | ,000 |
|                           | 403133401 | ,000             | ,000 |
|                           | 403133402 | ,000             | ,000 |
|                           | 403133550 | ,000             | ,000 |
|                           | 403133772 | ,000             | ,000 |
|                           | 403135803 | ,000             | ,000 |

Peer Review Only

## Categorical Variables Codings

|                           |           | Parameter coding |      |
|---------------------------|-----------|------------------|------|
|                           |           | (26)             | (27) |
| VASTY2 (SAIR*10000)+VASTY | 403073101 | ,000             | ,000 |
|                           | 403073102 | ,000             | ,000 |
|                           | 403073103 | ,000             | ,000 |
|                           | 403073202 | ,000             | ,000 |
|                           | 403073203 | ,000             | ,000 |
|                           | 403073204 | ,000             | ,000 |
|                           | 403073303 | ,000             | ,000 |
|                           | 403073651 | ,000             | ,000 |
|                           | 403073771 | ,000             | ,000 |
|                           | 403133102 | ,000             | ,000 |
|                           | 403133106 | ,000             | ,000 |
|                           | 403133107 | ,000             | ,000 |
|                           | 403133109 | ,000             | ,000 |
|                           | 403133202 | ,000             | ,000 |
|                           | 403133203 | ,000             | ,000 |
|                           | 403133204 | ,000             | ,000 |
|                           | 403133315 | ,000             | ,000 |
|                           | 403133322 | ,000             | ,000 |
|                           | 403133401 | ,000             | ,000 |
|                           | 403133402 | ,000             | ,000 |
|                           | 403133550 | ,000             | ,000 |
|                           | 403133772 | ,000             | ,000 |
|                           | 403135803 | ,000             | ,000 |

## Categorical Variables Codings

|                           |           | Parameter coding |      |
|---------------------------|-----------|------------------|------|
|                           |           | (28)             | (29) |
| VASTY2 (SAIR*10000)+VASTY | 403073101 | ,000             | ,000 |
|                           | 403073102 | ,000             | ,000 |
|                           | 403073103 | ,000             | ,000 |
|                           | 403073202 | ,000             | ,000 |
|                           | 403073203 | ,000             | ,000 |
|                           | 403073204 | ,000             | ,000 |
|                           | 403073303 | ,000             | ,000 |
|                           | 403073651 | ,000             | ,000 |
|                           | 403073771 | ,000             | ,000 |
|                           | 403133102 | ,000             | ,000 |
|                           | 403133106 | ,000             | ,000 |
|                           | 403133107 | ,000             | ,000 |
|                           | 403133109 | ,000             | ,000 |
|                           | 403133202 | ,000             | ,000 |
|                           | 403133203 | ,000             | ,000 |
|                           | 403133204 | ,000             | ,000 |
|                           | 403133315 | ,000             | ,000 |
|                           | 403133322 | ,000             | ,000 |
|                           | 403133401 | ,000             | ,000 |
|                           | 403133402 | ,000             | ,000 |
|                           | 403133550 | ,000             | ,000 |
|                           | 403133772 | ,000             | ,000 |
|                           | 403135803 | ,000             | ,000 |

## Categorical Variables Codings

|                           |           | Parameter coding |      |
|---------------------------|-----------|------------------|------|
|                           |           | (30)             | (31) |
| VASTY2 (SAIR*10000)+VASTY | 403073101 | ,000             | ,000 |
|                           | 403073102 | ,000             | ,000 |
|                           | 403073103 | ,000             | ,000 |
|                           | 403073202 | ,000             | ,000 |
|                           | 403073203 | ,000             | ,000 |
|                           | 403073204 | ,000             | ,000 |
|                           | 403073303 | ,000             | ,000 |
|                           | 403073651 | ,000             | ,000 |
|                           | 403073771 | ,000             | ,000 |
|                           | 403133102 | ,000             | ,000 |
|                           | 403133106 | ,000             | ,000 |
|                           | 403133107 | ,000             | ,000 |
|                           | 403133109 | ,000             | ,000 |
|                           | 403133202 | ,000             | ,000 |
|                           | 403133203 | ,000             | ,000 |
|                           | 403133204 | ,000             | ,000 |
|                           | 403133315 | ,000             | ,000 |
|                           | 403133322 | ,000             | ,000 |
|                           | 403133401 | ,000             | ,000 |
|                           | 403133402 | ,000             | ,000 |
|                           | 403133550 | ,000             | ,000 |
|                           | 403133772 | ,000             | ,000 |
|                           | 403135803 | ,000             | ,000 |

**Categorical Variables Codings**

|                           |           | Parameter coding |      |
|---------------------------|-----------|------------------|------|
|                           |           | (32)             | (33) |
| VASTY2 (SAIR*10000)+VASTY | 403073101 | ,000             | ,000 |
|                           | 403073102 | ,000             | ,000 |
|                           | 403073103 | ,000             | ,000 |
|                           | 403073202 | ,000             | ,000 |
|                           | 403073203 | ,000             | ,000 |
|                           | 403073204 | ,000             | ,000 |
|                           | 403073303 | ,000             | ,000 |
|                           | 403073651 | ,000             | ,000 |
|                           | 403073771 | ,000             | ,000 |
|                           | 403133102 | ,000             | ,000 |
|                           | 403133106 | ,000             | ,000 |
|                           | 403133107 | ,000             | ,000 |
|                           | 403133109 | ,000             | ,000 |
|                           | 403133202 | ,000             | ,000 |
|                           | 403133203 | ,000             | ,000 |
|                           | 403133204 | ,000             | ,000 |
|                           | 403133315 | ,000             | ,000 |
|                           | 403133322 | ,000             | ,000 |
|                           | 403133401 | ,000             | ,000 |
|                           | 403133402 | ,000             | ,000 |
|                           | 403133550 | ,000             | ,000 |
|                           | 403133772 | ,000             | ,000 |
|                           | 403135803 | ,000             | ,000 |

Peer Review Only

## Categorical Variables Codings

|                           |           | Parameter coding |      |
|---------------------------|-----------|------------------|------|
|                           |           | (34)             | (35) |
| VASTY2 (SAIR*10000)+VASTY | 403073101 | ,000             | ,000 |
|                           | 403073102 | ,000             | ,000 |
|                           | 403073103 | ,000             | ,000 |
|                           | 403073202 | ,000             | ,000 |
|                           | 403073203 | ,000             | ,000 |
|                           | 403073204 | ,000             | ,000 |
|                           | 403073303 | ,000             | ,000 |
|                           | 403073651 | ,000             | ,000 |
|                           | 403073771 | ,000             | ,000 |
|                           | 403133102 | ,000             | ,000 |
|                           | 403133106 | ,000             | ,000 |
|                           | 403133107 | ,000             | ,000 |
|                           | 403133109 | ,000             | ,000 |
|                           | 403133202 | ,000             | ,000 |
|                           | 403133203 | ,000             | ,000 |
|                           | 403133204 | ,000             | ,000 |
|                           | 403133315 | ,000             | ,000 |
|                           | 403133322 | ,000             | ,000 |
|                           | 403133401 | ,000             | ,000 |
|                           | 403133402 | ,000             | ,000 |
|                           | 403133550 | ,000             | ,000 |
|                           | 403133772 | ,000             | ,000 |
|                           | 403135803 | ,000             | ,000 |



## Categorical Variables Codings

|                            |                                         | Frequency | Parameter<br>(1) |
|----------------------------|-----------------------------------------|-----------|------------------|
|                            | 404060001                               | 365       | ,000             |
|                            | 404060002                               | 366       | ,000             |
|                            | 404310003                               | 291       | ,000             |
|                            | 404310004                               | 291       | ,000             |
|                            | 502300005                               | 366       | ,000             |
|                            | 502300006                               | 225       | ,000             |
|                            | 502300007                               | 366       | ,000             |
|                            | 502300214                               | 366       | ,000             |
|                            | 502300411                               | 366       | ,000             |
|                            | 502300415                               | 360       | ,000             |
|                            | 502300416                               | 363       | ,000             |
|                            | 502300811                               | 364       | ,000             |
|                            | 502300913                               | 315       | ,000             |
| weekday veckodag           | 1 måndag                                | 1805      | ,000             |
|                            | 2 tisdag                                | 1812      | 1,000            |
|                            | 3 onsdag                                | 1800      | ,000             |
|                            | 4 torsdag                               | 1794      | ,000             |
|                            | 5 fredag                                | 1788      | ,000             |
|                            | 6 lördag                                | 1735      | ,000             |
|                            | 7 söndag                                | 1741      | ,000             |
| season säsong/period       | 1 januari-mars                          | 3182      | ,000             |
|                            | 2 april-maj                             | 2127      | 1,000            |
|                            | 3 juni-augusti                          | 2911      | ,000             |
|                            | 4 september-oktober                     | 2144      | ,000             |
|                            | 5 november-december                     | 2111      | ,000             |
| sv5 kvintiler för standard | 1 tredje kvintilen                      | 1863      | ,000             |
|                            | 2 första kvintilen                      | 3570      | 1,000            |
|                            | 3 andra kvintilen                       | 1759      | ,000             |
|                            | 4 fjärde kvintilen                      | 2327      | ,000             |
|                            | 5 femte kvintilen                       | 2956      | ,000             |
| holiday större helg        | 1 ingen större helg                     | 12078     | ,000             |
|                            | 2 större helg (påsk/midsommar/julonyår) | 397       | 1,000            |

## Categorical Variables Codings

|                            |                                         | Parameter coding |       |
|----------------------------|-----------------------------------------|------------------|-------|
|                            |                                         | (2)              | (3)   |
|                            | 404060001                               | ,000             | ,000  |
|                            | 404060002                               | ,000             | ,000  |
|                            | 404310003                               | ,000             | ,000  |
|                            | 404310004                               | ,000             | ,000  |
|                            | 502300005                               | ,000             | ,000  |
|                            | 502300006                               | ,000             | ,000  |
|                            | 502300007                               | ,000             | ,000  |
|                            | 502300214                               | ,000             | ,000  |
|                            | 502300411                               | ,000             | ,000  |
|                            | 502300415                               | ,000             | ,000  |
|                            | 502300416                               | ,000             | ,000  |
|                            | 502300811                               | ,000             | ,000  |
|                            | 502300913                               | ,000             | ,000  |
| weekday veckodag           | 1 måndag                                | ,000             | ,000  |
|                            | 2 tisdag                                | ,000             | ,000  |
|                            | 3 onsdag                                | 1,000            | ,000  |
|                            | 4 torsdag                               | ,000             | 1,000 |
|                            | 5 fredag                                | ,000             | ,000  |
|                            | 6 lördag                                | ,000             | ,000  |
|                            | 7 söndag                                | ,000             | ,000  |
| season säsong/period       | 1 januari-mars                          | ,000             | ,000  |
|                            | 2 april-maj                             | ,000             | ,000  |
|                            | 3 juni-augusti                          | 1,000            | ,000  |
|                            | 4 september-oktober                     | ,000             | 1,000 |
|                            | 5 november-december                     | ,000             | ,000  |
| sv5 kvintiler för standard | 1 tredje kvintilen                      | ,000             | ,000  |
|                            | 2 första kvintilen                      | ,000             | ,000  |
|                            | 3 andra kvintilen                       | 1,000            | ,000  |
|                            | 4 fjärde kvintilen                      | ,000             | 1,000 |
|                            | 5 femte kvintilen                       | ,000             | ,000  |
| holiday större helg        | 1 ingen större helg                     |                  |       |
|                            | 2 större helg (påsk/midsommar/julonyår) |                  |       |

## Categorical Variables Codings

|                            |                                         | Parameter coding |       |
|----------------------------|-----------------------------------------|------------------|-------|
|                            |                                         | (4)              | (5)   |
|                            | 404060001                               | ,000             | ,000  |
|                            | 404060002                               | ,000             | ,000  |
|                            | 404310003                               | ,000             | ,000  |
|                            | 404310004                               | ,000             | ,000  |
|                            | 502300005                               | ,000             | ,000  |
|                            | 502300006                               | ,000             | ,000  |
|                            | 502300007                               | ,000             | ,000  |
|                            | 502300214                               | ,000             | ,000  |
|                            | 502300411                               | ,000             | ,000  |
|                            | 502300415                               | ,000             | ,000  |
|                            | 502300416                               | ,000             | ,000  |
|                            | 502300811                               | ,000             | ,000  |
|                            | 502300913                               | ,000             | ,000  |
| weekday veckodag           | 1 måndag                                | ,000             | ,000  |
|                            | 2 tisdag                                | ,000             | ,000  |
|                            | 3 onsdag                                | ,000             | ,000  |
|                            | 4 torsdag                               | ,000             | ,000  |
|                            | 5 fredag                                | 1,000            | ,000  |
|                            | 6 lördag                                | ,000             | 1,000 |
|                            | 7 söndag                                | ,000             | ,000  |
| season säsong/period       | 1 januari-mars                          | ,000             |       |
|                            | 2 april-maj                             | ,000             |       |
|                            | 3 juni-augusti                          | ,000             |       |
|                            | 4 september-oktober                     | ,000             |       |
|                            | 5 november-december                     | 1,000            |       |
| sv5 kvintiler för standard | 1 tredje kvintilen                      | ,000             |       |
|                            | 2 första kvintilen                      | ,000             |       |
|                            | 3 andra kvintilen                       | ,000             |       |
|                            | 4 fjärde kvintilen                      | ,000             |       |
|                            | 5 femte kvintilen                       | 1,000            |       |
| holiday större helg        | 1 ingen större helg                     |                  |       |
|                            | 2 större helg (påsk/midsommar/julonyår) |                  |       |

## Categorical Variables Codings

|                            |                                         | Parameter coding |      |
|----------------------------|-----------------------------------------|------------------|------|
|                            |                                         | (6)              | (7)  |
|                            | 404060001                               | ,000             | ,000 |
|                            | 404060002                               | ,000             | ,000 |
|                            | 404310003                               | ,000             | ,000 |
|                            | 404310004                               | ,000             | ,000 |
|                            | 502300005                               | ,000             | ,000 |
|                            | 502300006                               | ,000             | ,000 |
|                            | 502300007                               | ,000             | ,000 |
|                            | 502300214                               | ,000             | ,000 |
|                            | 502300411                               | ,000             | ,000 |
|                            | 502300415                               | ,000             | ,000 |
|                            | 502300416                               | ,000             | ,000 |
|                            | 502300811                               | ,000             | ,000 |
|                            | 502300913                               | ,000             | ,000 |
| weekday veckodag           | 1 måndag                                | ,000             |      |
|                            | 2 tisdag                                | ,000             |      |
|                            | 3 onsdag                                | ,000             |      |
|                            | 4 torsdag                               | ,000             |      |
|                            | 5 fredag                                | ,000             |      |
|                            | 6 lördag                                | ,000             |      |
|                            | 7 söndag                                | 1,000            |      |
| season säsong/period       | 1 januari-mars                          |                  |      |
|                            | 2 april-maj                             |                  |      |
|                            | 3 juni-augusti                          |                  |      |
|                            | 4 september-oktober                     |                  |      |
|                            | 5 november-december                     |                  |      |
| sv5 kvintiler för standard | 1 tredje kvintilen                      |                  |      |
|                            | 2 första kvintilen                      |                  |      |
|                            | 3 andra kvintilen                       |                  |      |
|                            | 4 fjärde kvintilen                      |                  |      |
|                            | 5 femte kvintilen                       |                  |      |
| holiday större helg        | 1 ingen större helg                     |                  |      |
|                            | 2 större helg (påsk/midsommar/julonyår) |                  |      |

## Categorical Variables Codings

|                            |                                         | Parameter coding |      |
|----------------------------|-----------------------------------------|------------------|------|
|                            |                                         | (8)              | (9)  |
|                            | 404060001                               | ,000             | ,000 |
|                            | 404060002                               | ,000             | ,000 |
|                            | 404310003                               | ,000             | ,000 |
|                            | 404310004                               | ,000             | ,000 |
|                            | 502300005                               | ,000             | ,000 |
|                            | 502300006                               | ,000             | ,000 |
|                            | 502300007                               | ,000             | ,000 |
|                            | 502300214                               | ,000             | ,000 |
|                            | 502300411                               | ,000             | ,000 |
|                            | 502300415                               | ,000             | ,000 |
|                            | 502300416                               | ,000             | ,000 |
|                            | 502300811                               | ,000             | ,000 |
|                            | 502300913                               | ,000             | ,000 |
| weekday veckodag           | 1 måndag                                |                  |      |
|                            | 2 tisdag                                |                  |      |
|                            | 3 onsdag                                |                  |      |
|                            | 4 torsdag                               |                  |      |
|                            | 5 fredag                                |                  |      |
|                            | 6 lördag                                |                  |      |
|                            | 7 söndag                                |                  |      |
| season säsong/period       | 1 januari-mars                          |                  |      |
|                            | 2 april-maj                             |                  |      |
|                            | 3 juni-augusti                          |                  |      |
|                            | 4 september-oktober                     |                  |      |
|                            | 5 november-december                     |                  |      |
| sv5 kvintiler för standard | 1 tredje kvintilen                      |                  |      |
|                            | 2 första kvintilen                      |                  |      |
|                            | 3 andra kvintilen                       |                  |      |
|                            | 4 fjärde kvintilen                      |                  |      |
|                            | 5 femte kvintilen                       |                  |      |
| holiday större helg        | 1 ingen större helg                     |                  |      |
|                            | 2 större helg (påsk/midsommar/julonyår) |                  |      |

## Categorical Variables Codings

|                            |                                         | Parameter coding |      |
|----------------------------|-----------------------------------------|------------------|------|
|                            |                                         | (10)             | (11) |
|                            | 404060001                               | ,000             | ,000 |
|                            | 404060002                               | ,000             | ,000 |
|                            | 404310003                               | ,000             | ,000 |
|                            | 404310004                               | ,000             | ,000 |
|                            | 502300005                               | ,000             | ,000 |
|                            | 502300006                               | ,000             | ,000 |
|                            | 502300007                               | ,000             | ,000 |
|                            | 502300214                               | ,000             | ,000 |
|                            | 502300411                               | ,000             | ,000 |
|                            | 502300415                               | ,000             | ,000 |
|                            | 502300416                               | ,000             | ,000 |
|                            | 502300811                               | ,000             | ,000 |
|                            | 502300913                               | ,000             | ,000 |
| weekday veckodag           | 1 måndag                                |                  |      |
|                            | 2 tisdag                                |                  |      |
|                            | 3 onsdag                                |                  |      |
|                            | 4 torsdag                               |                  |      |
|                            | 5 fredag                                |                  |      |
|                            | 6 lördag                                |                  |      |
|                            | 7 söndag                                |                  |      |
| season säsong/period       | 1 januari-mars                          |                  |      |
|                            | 2 april-maj                             |                  |      |
|                            | 3 juni-augusti                          |                  |      |
|                            | 4 september-oktober                     |                  |      |
|                            | 5 november-december                     |                  |      |
| sv5 kvintiler för standard | 1 tredje kvintilen                      |                  |      |
|                            | 2 första kvintilen                      |                  |      |
|                            | 3 andra kvintilen                       |                  |      |
|                            | 4 fjärde kvintilen                      |                  |      |
|                            | 5 femte kvintilen                       |                  |      |
| holiday större helg        | 1 ingen större helg                     |                  |      |
|                            | 2 större helg (påsk/midsommar/julonyår) |                  |      |

## Categorical Variables Codings

|                            |                                         | Parameter coding |      |
|----------------------------|-----------------------------------------|------------------|------|
|                            |                                         | (12)             | (13) |
|                            | 404060001                               | ,000             | ,000 |
|                            | 404060002                               | ,000             | ,000 |
|                            | 404310003                               | ,000             | ,000 |
|                            | 404310004                               | ,000             | ,000 |
|                            | 502300005                               | ,000             | ,000 |
|                            | 502300006                               | ,000             | ,000 |
|                            | 502300007                               | ,000             | ,000 |
|                            | 502300214                               | ,000             | ,000 |
|                            | 502300411                               | ,000             | ,000 |
|                            | 502300415                               | ,000             | ,000 |
|                            | 502300416                               | ,000             | ,000 |
|                            | 502300811                               | ,000             | ,000 |
|                            | 502300913                               | ,000             | ,000 |
| weekday veckodag           | 1 måndag                                |                  |      |
|                            | 2 tisdag                                |                  |      |
|                            | 3 onsdag                                |                  |      |
|                            | 4 torsdag                               |                  |      |
|                            | 5 fredag                                |                  |      |
|                            | 6 lördag                                |                  |      |
|                            | 7 söndag                                |                  |      |
| season säsong/period       | 1 januari-mars                          |                  |      |
|                            | 2 april-maj                             |                  |      |
|                            | 3 juni-augusti                          |                  |      |
|                            | 4 september-oktober                     |                  |      |
|                            | 5 november-december                     |                  |      |
| sv5 kvintiler för standard | 1 tredje kvintilen                      |                  |      |
|                            | 2 första kvintilen                      |                  |      |
|                            | 3 andra kvintilen                       |                  |      |
|                            | 4 fjärde kvintilen                      |                  |      |
|                            | 5 femte kvintilen                       |                  |      |
| holiday större helg        | 1 ingen större helg                     |                  |      |
|                            | 2 större helg (påsk/midsommar/julonyår) |                  |      |

## Categorical Variables Codings

|                            |                                         | Parameter coding |      |
|----------------------------|-----------------------------------------|------------------|------|
|                            |                                         | (14)             | (15) |
|                            | 404060001                               | ,000             | ,000 |
|                            | 404060002                               | ,000             | ,000 |
|                            | 404310003                               | ,000             | ,000 |
|                            | 404310004                               | ,000             | ,000 |
|                            | 502300005                               | ,000             | ,000 |
|                            | 502300006                               | ,000             | ,000 |
|                            | 502300007                               | ,000             | ,000 |
|                            | 502300214                               | ,000             | ,000 |
|                            | 502300411                               | ,000             | ,000 |
|                            | 502300415                               | ,000             | ,000 |
|                            | 502300416                               | ,000             | ,000 |
|                            | 502300811                               | ,000             | ,000 |
|                            | 502300913                               | ,000             | ,000 |
| weekday veckodag           | 1 måndag                                |                  |      |
|                            | 2 tisdag                                |                  |      |
|                            | 3 onsdag                                |                  |      |
|                            | 4 torsdag                               |                  |      |
|                            | 5 fredag                                |                  |      |
|                            | 6 lördag                                |                  |      |
|                            | 7 söndag                                |                  |      |
| season säsong/period       | 1 januari-mars                          |                  |      |
|                            | 2 april-maj                             |                  |      |
|                            | 3 juni-augusti                          |                  |      |
|                            | 4 september-oktober                     |                  |      |
|                            | 5 november-december                     |                  |      |
| sv5 kvintiler för standard | 1 tredje kvintilen                      |                  |      |
|                            | 2 första kvintilen                      |                  |      |
|                            | 3 andra kvintilen                       |                  |      |
|                            | 4 fjärde kvintilen                      |                  |      |
|                            | 5 femte kvintilen                       |                  |      |
| holiday större helg        | 1 ingen större helg                     |                  |      |
|                            | 2 större helg (påsk/midsommar/julonyår) |                  |      |



## Categorical Variables Codings

|                            |                                         | Parameter coding |      |
|----------------------------|-----------------------------------------|------------------|------|
|                            |                                         | (16)             | (17) |
|                            | 404060001                               | ,000             | ,000 |
|                            | 404060002                               | ,000             | ,000 |
|                            | 404310003                               | ,000             | ,000 |
|                            | 404310004                               | ,000             | ,000 |
|                            | 502300005                               | ,000             | ,000 |
|                            | 502300006                               | ,000             | ,000 |
|                            | 502300007                               | ,000             | ,000 |
|                            | 502300214                               | ,000             | ,000 |
|                            | 502300411                               | ,000             | ,000 |
|                            | 502300415                               | ,000             | ,000 |
|                            | 502300416                               | ,000             | ,000 |
|                            | 502300811                               | ,000             | ,000 |
|                            | 502300913                               | ,000             | ,000 |
| weekday veckodag           | 1 måndag                                |                  |      |
|                            | 2 tisdag                                |                  |      |
|                            | 3 onsdag                                |                  |      |
|                            | 4 torsdag                               |                  |      |
|                            | 5 fredag                                |                  |      |
|                            | 6 lördag                                |                  |      |
|                            | 7 söndag                                |                  |      |
| season säsong/period       | 1 januari-mars                          |                  |      |
|                            | 2 april-maj                             |                  |      |
|                            | 3 juni-augusti                          |                  |      |
|                            | 4 september-oktober                     |                  |      |
|                            | 5 november-december                     |                  |      |
| sv5 kvintiler för standard | 1 tredje kvintilen                      |                  |      |
|                            | 2 första kvintilen                      |                  |      |
|                            | 3 andra kvintilen                       |                  |      |
|                            | 4 fjärde kvintilen                      |                  |      |
|                            | 5 femte kvintilen                       |                  |      |
| holiday större helg        | 1 ingen större helg                     |                  |      |
|                            | 2 större helg (påsk/midsommar/julonyår) |                  |      |

## Categorical Variables Codings

|                            |                                         | Parameter coding |      |
|----------------------------|-----------------------------------------|------------------|------|
|                            |                                         | (18)             | (19) |
|                            | 404060001                               | ,000             | ,000 |
|                            | 404060002                               | ,000             | ,000 |
|                            | 404310003                               | ,000             | ,000 |
|                            | 404310004                               | ,000             | ,000 |
|                            | 502300005                               | ,000             | ,000 |
|                            | 502300006                               | ,000             | ,000 |
|                            | 502300007                               | ,000             | ,000 |
|                            | 502300214                               | ,000             | ,000 |
|                            | 502300411                               | ,000             | ,000 |
|                            | 502300415                               | ,000             | ,000 |
|                            | 502300416                               | ,000             | ,000 |
|                            | 502300811                               | ,000             | ,000 |
|                            | 502300913                               | ,000             | ,000 |
| weekday veckodag           | 1 måndag                                |                  |      |
|                            | 2 tisdag                                |                  |      |
|                            | 3 onsdag                                |                  |      |
|                            | 4 torsdag                               |                  |      |
|                            | 5 fredag                                |                  |      |
|                            | 6 lördag                                |                  |      |
|                            | 7 söndag                                |                  |      |
| season säsong/period       | 1 januari-mars                          |                  |      |
|                            | 2 april-maj                             |                  |      |
|                            | 3 juni-augusti                          |                  |      |
|                            | 4 september-oktober                     |                  |      |
|                            | 5 november-december                     |                  |      |
| sv5 kvintiler för standard | 1 tredje kvintilen                      |                  |      |
|                            | 2 första kvintilen                      |                  |      |
|                            | 3 andra kvintilen                       |                  |      |
|                            | 4 fjärde kvintilen                      |                  |      |
|                            | 5 femte kvintilen                       |                  |      |
| holiday större helg        | 1 ingen större helg                     |                  |      |
|                            | 2 större helg (påsk/midsommar/julonyår) |                  |      |

## Categorical Variables Codings

|                            |                                         | Parameter coding |      |
|----------------------------|-----------------------------------------|------------------|------|
|                            |                                         | (20)             | (21) |
|                            | 404060001                               | ,000             | ,000 |
|                            | 404060002                               | ,000             | ,000 |
|                            | 404310003                               | ,000             | ,000 |
|                            | 404310004                               | ,000             | ,000 |
|                            | 502300005                               | ,000             | ,000 |
|                            | 502300006                               | ,000             | ,000 |
|                            | 502300007                               | ,000             | ,000 |
|                            | 502300214                               | ,000             | ,000 |
|                            | 502300411                               | ,000             | ,000 |
|                            | 502300415                               | ,000             | ,000 |
|                            | 502300416                               | ,000             | ,000 |
|                            | 502300811                               | ,000             | ,000 |
|                            | 502300913                               | ,000             | ,000 |
| weekday veckodag           | 1 måndag                                |                  |      |
|                            | 2 tisdag                                |                  |      |
|                            | 3 onsdag                                |                  |      |
|                            | 4 torsdag                               |                  |      |
|                            | 5 fredag                                |                  |      |
|                            | 6 lördag                                |                  |      |
|                            | 7 söndag                                |                  |      |
| season säsong/period       | 1 januari-mars                          |                  |      |
|                            | 2 april-maj                             |                  |      |
|                            | 3 juni-augusti                          |                  |      |
|                            | 4 september-oktober                     |                  |      |
|                            | 5 november-december                     |                  |      |
| sv5 kvintiler för standard | 1 tredje kvintilen                      |                  |      |
|                            | 2 första kvintilen                      |                  |      |
|                            | 3 andra kvintilen                       |                  |      |
|                            | 4 fjärde kvintilen                      |                  |      |
|                            | 5 femte kvintilen                       |                  |      |
| holiday större helg        | 1 ingen större helg                     |                  |      |
|                            | 2 större helg (påsk/midsommar/julonyår) |                  |      |

## Categorical Variables Codings

|                            |                                         | Parameter coding |       |
|----------------------------|-----------------------------------------|------------------|-------|
|                            |                                         | (22)             | (23)  |
|                            | 404060001                               | ,000             | 1,000 |
|                            | 404060002                               | ,000             | ,000  |
|                            | 404310003                               | ,000             | ,000  |
|                            | 404310004                               | ,000             | ,000  |
|                            | 502300005                               | ,000             | ,000  |
|                            | 502300006                               | ,000             | ,000  |
|                            | 502300007                               | ,000             | ,000  |
|                            | 502300214                               | ,000             | ,000  |
|                            | 502300411                               | ,000             | ,000  |
|                            | 502300415                               | ,000             | ,000  |
|                            | 502300416                               | ,000             | ,000  |
|                            | 502300811                               | ,000             | ,000  |
|                            | 502300913                               | ,000             | ,000  |
| weekday veckodag           | 1 måndag                                |                  |       |
|                            | 2 tisdag                                |                  |       |
|                            | 3 onsdag                                |                  |       |
|                            | 4 torsdag                               |                  |       |
|                            | 5 fredag                                |                  |       |
|                            | 6 lördag                                |                  |       |
|                            | 7 söndag                                |                  |       |
| season säsong/period       | 1 januari-mars                          |                  |       |
|                            | 2 april-maj                             |                  |       |
|                            | 3 juni-augusti                          |                  |       |
|                            | 4 september-oktober                     |                  |       |
|                            | 5 november-december                     |                  |       |
| sv5 kvintiler för standard | 1 tredje kvintilen                      |                  |       |
|                            | 2 första kvintilen                      |                  |       |
|                            | 3 andra kvintilen                       |                  |       |
|                            | 4 fjärde kvintilen                      |                  |       |
|                            | 5 femte kvintilen                       |                  |       |
| holiday större helg        | 1 ingen större helg                     |                  |       |
|                            | 2 större helg (påsk/midsommar/julonyår) |                  |       |

## Categorical Variables Codings

|                            |                                         | Parameter coding |       |
|----------------------------|-----------------------------------------|------------------|-------|
|                            |                                         | (24)             | (25)  |
|                            | 404060001                               | ,000             | ,000  |
|                            | 404060002                               | 1,000            | ,000  |
|                            | 404310003                               | ,000             | 1,000 |
|                            | 404310004                               | ,000             | ,000  |
|                            | 502300005                               | ,000             | ,000  |
|                            | 502300006                               | ,000             | ,000  |
|                            | 502300007                               | ,000             | ,000  |
|                            | 502300214                               | ,000             | ,000  |
|                            | 502300411                               | ,000             | ,000  |
|                            | 502300415                               | ,000             | ,000  |
|                            | 502300416                               | ,000             | ,000  |
|                            | 502300811                               | ,000             | ,000  |
|                            | 502300913                               | ,000             | ,000  |
| weekday veckodag           | 1 måndag                                |                  |       |
|                            | 2 tisdag                                |                  |       |
|                            | 3 onsdag                                |                  |       |
|                            | 4 torsdag                               |                  |       |
|                            | 5 fredag                                |                  |       |
|                            | 6 lördag                                |                  |       |
|                            | 7 söndag                                |                  |       |
| season säsong/period       | 1 januari-mars                          |                  |       |
|                            | 2 april-maj                             |                  |       |
|                            | 3 juni-augusti                          |                  |       |
|                            | 4 september-oktober                     |                  |       |
|                            | 5 november-december                     |                  |       |
| sv5 kvintiler för standard | 1 tredje kvintilen                      |                  |       |
|                            | 2 första kvintilen                      |                  |       |
|                            | 3 andra kvintilen                       |                  |       |
|                            | 4 fjärde kvintilen                      |                  |       |
|                            | 5 femte kvintilen                       |                  |       |
| holiday större helg        | 1 ingen större helg                     |                  |       |
|                            | 2 större helg (påsk/midsommar/julonyår) |                  |       |

## Categorical Variables Codings

|                            |                                         | Parameter coding |       |
|----------------------------|-----------------------------------------|------------------|-------|
|                            |                                         | (26)             | (27)  |
|                            | 404060001                               | ,000             | ,000  |
|                            | 404060002                               | ,000             | ,000  |
|                            | 404310003                               | ,000             | ,000  |
|                            | 404310004                               | 1,000            | ,000  |
|                            | 502300005                               | ,000             | 1,000 |
|                            | 502300006                               | ,000             | ,000  |
|                            | 502300007                               | ,000             | ,000  |
|                            | 502300214                               | ,000             | ,000  |
|                            | 502300411                               | ,000             | ,000  |
|                            | 502300415                               | ,000             | ,000  |
|                            | 502300416                               | ,000             | ,000  |
|                            | 502300811                               | ,000             | ,000  |
|                            | 502300913                               | ,000             | ,000  |
| weekday veckodag           | 1 måndag                                |                  |       |
|                            | 2 tisdag                                |                  |       |
|                            | 3 onsdag                                |                  |       |
|                            | 4 torsdag                               |                  |       |
|                            | 5 fredag                                |                  |       |
|                            | 6 lördag                                |                  |       |
|                            | 7 söndag                                |                  |       |
| season säsong/period       | 1 januari-mars                          |                  |       |
|                            | 2 april-maj                             |                  |       |
|                            | 3 juni-augusti                          |                  |       |
|                            | 4 september-oktober                     |                  |       |
|                            | 5 november-december                     |                  |       |
| sv5 kvintiler för standard | 1 tredje kvintilen                      |                  |       |
|                            | 2 första kvintilen                      |                  |       |
|                            | 3 andra kvintilen                       |                  |       |
|                            | 4 fjärde kvintilen                      |                  |       |
|                            | 5 femte kvintilen                       |                  |       |
| holiday större helg        | 1 ingen större helg                     |                  |       |
|                            | 2 större helg (påsk/midsommar/julonyår) |                  |       |

## Categorical Variables Codings

|                            |                                         | Parameter coding |       |
|----------------------------|-----------------------------------------|------------------|-------|
|                            |                                         | (28)             | (29)  |
|                            | 404060001                               | ,000             | ,000  |
|                            | 404060002                               | ,000             | ,000  |
|                            | 404310003                               | ,000             | ,000  |
|                            | 404310004                               | ,000             | ,000  |
|                            | 502300005                               | ,000             | ,000  |
|                            | 502300006                               | 1,000            | ,000  |
|                            | 502300007                               | ,000             | 1,000 |
|                            | 502300214                               | ,000             | ,000  |
|                            | 502300411                               | ,000             | ,000  |
|                            | 502300415                               | ,000             | ,000  |
|                            | 502300416                               | ,000             | ,000  |
|                            | 502300811                               | ,000             | ,000  |
|                            | 502300913                               | ,000             | ,000  |
| weekday veckodag           | 1 måndag                                |                  |       |
|                            | 2 tisdag                                |                  |       |
|                            | 3 onsdag                                |                  |       |
|                            | 4 torsdag                               |                  |       |
|                            | 5 fredag                                |                  |       |
|                            | 6 lördag                                |                  |       |
|                            | 7 söndag                                |                  |       |
| season säsong/period       | 1 januari-mars                          |                  |       |
|                            | 2 april-maj                             |                  |       |
|                            | 3 juni-augusti                          |                  |       |
|                            | 4 september-oktober                     |                  |       |
|                            | 5 november-december                     |                  |       |
| sv5 kvintiler för standard | 1 tredje kvintilen                      |                  |       |
|                            | 2 första kvintilen                      |                  |       |
|                            | 3 andra kvintilen                       |                  |       |
|                            | 4 fjärde kvintilen                      |                  |       |
|                            | 5 femte kvintilen                       |                  |       |
| holiday större helg        | 1 ingen större helg                     |                  |       |
|                            | 2 större helg (påsk/midsommar/julonyår) |                  |       |

## Categorical Variables Codings

|                            |                                         | Parameter coding |       |
|----------------------------|-----------------------------------------|------------------|-------|
|                            |                                         | (30)             | (31)  |
|                            | 404060001                               | ,000             | ,000  |
|                            | 404060002                               | ,000             | ,000  |
|                            | 404310003                               | ,000             | ,000  |
|                            | 404310004                               | ,000             | ,000  |
|                            | 502300005                               | ,000             | ,000  |
|                            | 502300006                               | ,000             | ,000  |
|                            | 502300007                               | ,000             | ,000  |
|                            | 502300214                               | 1,000            | ,000  |
|                            | 502300411                               | ,000             | 1,000 |
|                            | 502300415                               | ,000             | ,000  |
|                            | 502300416                               | ,000             | ,000  |
|                            | 502300811                               | ,000             | ,000  |
|                            | 502300913                               | ,000             | ,000  |
| weekday veckodag           | 1 måndag                                |                  |       |
|                            | 2 tisdag                                |                  |       |
|                            | 3 onsdag                                |                  |       |
|                            | 4 torsdag                               |                  |       |
|                            | 5 fredag                                |                  |       |
|                            | 6 lördag                                |                  |       |
|                            | 7 söndag                                |                  |       |
| season säsong/period       | 1 januari-mars                          |                  |       |
|                            | 2 april-maj                             |                  |       |
|                            | 3 juni-augusti                          |                  |       |
|                            | 4 september-oktober                     |                  |       |
|                            | 5 november-december                     |                  |       |
| sv5 kvintiler för standard | 1 tredje kvintilen                      |                  |       |
|                            | 2 första kvintilen                      |                  |       |
|                            | 3 andra kvintilen                       |                  |       |
|                            | 4 fjärde kvintilen                      |                  |       |
|                            | 5 femte kvintilen                       |                  |       |
| holiday större helg        | 1 ingen större helg                     |                  |       |
|                            | 2 större helg (påsk/midsommar/julonyår) |                  |       |



## Categorical Variables Codings

|                            |                                         | Parameter coding |       |
|----------------------------|-----------------------------------------|------------------|-------|
|                            |                                         | (32)             | (33)  |
|                            | 404060001                               | ,000             | ,000  |
|                            | 404060002                               | ,000             | ,000  |
|                            | 404310003                               | ,000             | ,000  |
|                            | 404310004                               | ,000             | ,000  |
|                            | 502300005                               | ,000             | ,000  |
|                            | 502300006                               | ,000             | ,000  |
|                            | 502300007                               | ,000             | ,000  |
|                            | 502300214                               | ,000             | ,000  |
|                            | 502300411                               | ,000             | ,000  |
|                            | 502300415                               | 1,000            | ,000  |
|                            | 502300416                               | ,000             | 1,000 |
|                            | 502300811                               | ,000             | ,000  |
|                            | 502300913                               | ,000             | ,000  |
| weekday veckodag           | 1 måndag                                |                  |       |
|                            | 2 tisdag                                |                  |       |
|                            | 3 onsdag                                |                  |       |
|                            | 4 torsdag                               |                  |       |
|                            | 5 fredag                                |                  |       |
|                            | 6 lördag                                |                  |       |
|                            | 7 söndag                                |                  |       |
| season säsong/period       | 1 januari-mars                          |                  |       |
|                            | 2 april-maj                             |                  |       |
|                            | 3 juni-augusti                          |                  |       |
|                            | 4 september-oktober                     |                  |       |
|                            | 5 november-december                     |                  |       |
| sv5 kvintiler för standard | 1 tredje kvintilen                      |                  |       |
|                            | 2 första kvintilen                      |                  |       |
|                            | 3 andra kvintilen                       |                  |       |
|                            | 4 fjärde kvintilen                      |                  |       |
|                            | 5 femte kvintilen                       |                  |       |
| holiday större helg        | 1 ingen större helg                     |                  |       |
|                            | 2 större helg (påsk/midsommar/julonyår) |                  |       |

## Categorical Variables Codings

|                            |                                         | Parameter coding |       |
|----------------------------|-----------------------------------------|------------------|-------|
|                            |                                         | (34)             | (35)  |
|                            | 404060001                               | ,000             | ,000  |
|                            | 404060002                               | ,000             | ,000  |
|                            | 404310003                               | ,000             | ,000  |
|                            | 404310004                               | ,000             | ,000  |
|                            | 502300005                               | ,000             | ,000  |
|                            | 502300006                               | ,000             | ,000  |
|                            | 502300007                               | ,000             | ,000  |
|                            | 502300214                               | ,000             | ,000  |
|                            | 502300411                               | ,000             | ,000  |
|                            | 502300415                               | ,000             | ,000  |
|                            | 502300416                               | ,000             | ,000  |
|                            | 502300811                               | 1,000            | ,000  |
|                            | 502300913                               | ,000             | 1,000 |
| weekday veckodag           | 1 måndag                                |                  |       |
|                            | 2 tisdag                                |                  |       |
|                            | 3 onsdag                                |                  |       |
|                            | 4 torsdag                               |                  |       |
|                            | 5 fredag                                |                  |       |
|                            | 6 lördag                                |                  |       |
|                            | 7 söndag                                |                  |       |
| season säsong/period       | 1 januari-mars                          |                  |       |
|                            | 2 april-maj                             |                  |       |
|                            | 3 juni-augusti                          |                  |       |
|                            | 4 september-oktober                     |                  |       |
|                            | 5 november-december                     |                  |       |
| sv5 kvintiler för standard | 1 tredje kvintilen                      |                  |       |
|                            | 2 första kvintilen                      |                  |       |
|                            | 3 andra kvintilen                       |                  |       |
|                            | 4 fjärde kvintilen                      |                  |       |
|                            | 5 femte kvintilen                       |                  |       |
| holiday större helg        | 1 ingen större helg                     |                  |       |
|                            | 2 större helg (påsk/midsommar/julonyår) |                  |       |

**Block 0: Beginning Block**

Classification Table<sup>a,b</sup>

| Observed           |                              | Predicted                    |                     |   |
|--------------------|------------------------------|------------------------------|---------------------|---|
|                    |                              | hand01 händelse nej eller ja |                     |   |
|                    |                              | 0 ingen händelse             | 1 minst en händelse |   |
| Step 0             | hand01 händelse nej eller ja | 0 ingen händelse             | 11108               | 0 |
|                    |                              | 1 minst en händelse          | 1367                | 0 |
| Overall Percentage |                              |                              |                     |   |

Classification Table<sup>a,b</sup>

| Observed           |                              | Predicted           |       |
|--------------------|------------------------------|---------------------|-------|
|                    |                              | Percentage Correct  |       |
| Step 0             | hand01 händelse nej eller ja | 0 ingen händelse    | 100,0 |
|                    |                              | 1 minst en händelse | ,0    |
| Overall Percentage |                              |                     | 89,0  |

a. Constant is included in the model.

b. The cut value is ,500

Variables in the Equation

|                 | B      | S.E. | Wald     | df | Sig. | Exp(B) |
|-----------------|--------|------|----------|----|------|--------|
| Step 0 Constant | -2,095 | ,029 | 5342,584 | 1  | ,000 | ,123   |

## Variables not in the Equation

|        |           |            | Score   | df | Sig. |
|--------|-----------|------------|---------|----|------|
| Step 0 | Variables | sv5        | 37,974  | 4  | ,000 |
|        |           | sv5(1)     | 31,998  | 1  | ,000 |
|        |           | sv5(2)     | ,095    | 1  | ,757 |
|        |           | sv5(3)     | 1,220   | 1  | ,269 |
|        |           | sv5(4)     | 15,862  | 1  | ,000 |
|        |           | VASTY2     | 541,214 | 35 | ,000 |
|        |           | VASTY2(1)  | 1,169   | 1  | ,280 |
|        |           | VASTY2(2)  | 87,511  | 1  | ,000 |
|        |           | VASTY2(3)  | 13,995  | 1  | ,000 |
|        |           | VASTY2(4)  | ,464    | 1  | ,496 |
|        |           | VASTY2(5)  | 5,526   | 1  | ,019 |
|        |           | VASTY2(6)  | 19,435  | 1  | ,000 |
|        |           | VASTY2(7)  | 86,074  | 1  | ,000 |
|        |           | VASTY2(8)  | 1,043   | 1  | ,307 |
|        |           | VASTY2(9)  | ,408    | 1  | ,523 |
|        |           | VASTY2(10) | 58,583  | 1  | ,000 |
|        |           | VASTY2(11) | 33,445  | 1  | ,000 |
|        |           | VASTY2(12) | ,029    | 1  | ,865 |
|        |           | VASTY2(13) | 33,445  | 1  | ,000 |
|        |           | VASTY2(14) | 4,163   | 1  | ,041 |
|        |           | VASTY2(15) | ,464    | 1  | ,496 |
|        |           | VASTY2(16) | ,763    | 1  | ,382 |
|        |           | VASTY2(17) | 24,320  | 1  | ,000 |
|        |           | VASTY2(18) | 17,742  | 1  | ,000 |
|        |           | VASTY2(19) | 27,791  | 1  | ,000 |
|        |           | VASTY2(20) | ,015    | 1  | ,902 |
|        |           | VASTY2(21) | 2,890   | 1  | ,089 |
|        |           | VASTY2(22) | ,462    | 1  | ,497 |
|        |           | VASTY2(23) | 15,306  | 1  | ,000 |
|        |           | VASTY2(24) | 12,594  | 1  | ,000 |
|        |           | VASTY2(25) | ,128    | 1  | ,720 |
|        |           | VASTY2(26) | 12,864  | 1  | ,000 |
|        |           | VASTY2(27) | 24,439  | 1  | ,000 |
|        |           | VASTY2(28) | 9,963   | 1  | ,002 |
|        |           | VASTY2(29) | 18,184  | 1  | ,000 |
|        |           | VASTY2(30) | ,486    | 1  | ,486 |
|        |           | VASTY2(31) | 6,400   | 1  | ,011 |
|        |           | VASTY2(32) | 1,626   | 1  | ,202 |
|        |           | VASTY2(33) | 1,336   | 1  | ,248 |
|        |           | VASTY2(34) | 29,489  | 1  | ,000 |
|        |           | VASTY2(35) | 3,668   | 1  | ,055 |
|        |           | weekday    | 20,834  | 6  | ,002 |
|        |           | weekday(1) | ,196    | 1  | ,658 |

## Variables not in the Equation

|                    | Score   | df | Sig. |
|--------------------|---------|----|------|
| weekday(2)         | ,004    | 1  | ,951 |
| weekday(3)         | 1,386   | 1  | ,239 |
| weekday(4)         | ,820    | 1  | ,365 |
| weekday(5)         | 20,097  | 1  | ,000 |
| weekday(6)         | 1,022   | 1  | ,312 |
| holiday(1)         | 4,862   | 1  | ,027 |
| season             | 15,673  | 4  | ,003 |
| season(1)          | ,214    | 1  | ,643 |
| season(2)          | 8,095   | 1  | ,004 |
| season(3)          | 10,213  | 1  | ,001 |
| season(4)          | ,313    | 1  | ,576 |
| Overall Statistics | 601,497 | 50 | ,000 |

## Block 1: Method = Enter

## Omnibus Tests of Model Coefficients

|             | Chi-square | df | Sig. |
|-------------|------------|----|------|
| Step 1 Step | 600,509    | 50 | ,000 |
| Block       | 600,509    | 50 | ,000 |
| Model       | 600,509    | 50 | ,000 |

## Model Summary

| Step | -2 Log likelihood     | Cox & Snell R Square | Nagelkerke R Square |
|------|-----------------------|----------------------|---------------------|
| 1    | 8023,073 <sup>a</sup> | ,047                 | ,094                |

a. Estimation terminated at iteration number 6 because parameter estimates changed by less than ,001.

Classification Table<sup>a</sup>

| Observed           |                              | Predicted                    |                     |
|--------------------|------------------------------|------------------------------|---------------------|
|                    |                              | hand01 händelse nej eller ja |                     |
|                    |                              | 0 ingen händelse             | 1 minst en händelse |
| Step 1             | hand01 händelse nej eller ja | 0 ingen händelse             | 0                   |
|                    |                              | 1 minst en händelse          | 0                   |
| Overall Percentage |                              | 11108                        | 1367                |

Classification Table<sup>a</sup>

| Observed           |                              |                     | Predicted          |
|--------------------|------------------------------|---------------------|--------------------|
|                    |                              |                     | Percentage Correct |
| Step 1             | hand01 händelse nej eller ja | 0 ingen händelse    | 100,0              |
|                    |                              | 1 minst en händelse | ,0                 |
| Overall Percentage |                              |                     | 89,0               |

a. The cut value is ,500

Variables in the Equation

|                     |            | B      | S.E. | Wald    | df | Sig. | Exp(B) |
|---------------------|------------|--------|------|---------|----|------|--------|
| Step 1 <sup>a</sup> | sv5        |        |      | 13,344  | 4  | ,010 |        |
|                     | sv5(1)     | -,171  | ,109 | 2,454   | 1  | ,117 | ,842   |
|                     | sv5(2)     | -,043  | ,108 | ,160    | 1  | ,689 | ,958   |
|                     | sv5(3)     | -,069  | ,100 | ,474    | 1  | ,491 | ,933   |
|                     | sv5(4)     | ,224   | ,109 | 4,251   | 1  | ,039 | 1,251  |
|                     | VASTY2     |        |      | 438,244 | 35 | ,000 |        |
|                     | VASTY2(1)  | ,299   | ,241 | 1,537   | 1  | ,215 | 1,348  |
|                     | VASTY2(2)  | 1,090  | ,222 | 24,070  | 1  | ,000 | 2,974  |
|                     | VASTY2(3)  | -,670  | ,302 | 4,916   | 1  | ,027 | ,512   |
|                     | VASTY2(4)  | ,306   | ,242 | 1,600   | 1  | ,206 | 1,359  |
|                     | VASTY2(5)  | -,288  | ,283 | 1,029   | 1  | ,310 | ,750   |
|                     | VASTY2(6)  | -1,161 | ,334 | 12,051  | 1  | ,001 | ,313   |
|                     | VASTY2(7)  | 1,259  | ,217 | 33,591  | 1  | ,000 | 3,520  |
|                     | VASTY2(8)  | ,363   | ,241 | 2,270   | 1  | ,132 | 1,438  |
|                     | VASTY2(9)  | ,283   | ,246 | 1,320   | 1  | ,251 | 1,326  |
|                     | VASTY2(10) | ,912   | ,227 | 16,180  | 1  | ,000 | 2,489  |
|                     | VASTY2(11) | ,908   | ,223 | 16,576  | 1  | ,000 | 2,479  |
|                     | VASTY2(12) | ,034   | ,251 | ,018    | 1  | ,892 | 1,035  |
|                     | VASTY2(13) | ,723   | ,231 | 9,766   | 1  | ,002 | 2,061  |
|                     | VASTY2(14) | -,312  | ,269 | 1,342   | 1  | ,247 | ,732   |
|                     | VASTY2(15) | ,145   | ,247 | ,345    | 1  | ,557 | 1,156  |
|                     | VASTY2(16) | ,228   | ,290 | ,620    | 1  | ,431 | 1,257  |
|                     | VASTY2(17) | -1,183 | ,356 | 11,032  | 1  | ,001 | ,306   |
|                     | VASTY2(18) | -,740  | ,329 | 5,064   | 1  | ,024 | ,477   |
|                     | VASTY2(19) | -1,274 | ,391 | 10,613  | 1  | ,001 | ,280   |
|                     | VASTY2(20) | -,005  | ,264 | ,000    | 1  | ,986 | ,995   |
|                     | VASTY2(21) | -,112  | ,263 | ,182    | 1  | ,670 | ,894   |
|                     | VASTY2(22) | ,053   | ,252 | ,044    | 1  | ,834 | 1,054  |
|                     | VASTY2(23) | ,703   | ,228 | 9,499   | 1  | ,002 | 2,020  |
|                     | VASTY2(24) | ,584   | ,230 | 6,458   | 1  | ,011 | 1,794  |
|                     | VASTY2(25) | ,091   | ,266 | ,118    | 1  | ,731 | 1,096  |

## Variables in the Equation

|                     |            | 95% C.I. for EXP(B) |       |
|---------------------|------------|---------------------|-------|
|                     |            | Lower               | Upper |
| Step 1 <sup>a</sup> | sv5        |                     |       |
|                     | sv5(1)     | ,680                | 1,044 |
|                     | sv5(2)     | ,775                | 1,184 |
|                     | sv5(3)     | ,767                | 1,136 |
|                     | sv5(4)     | 1,011               | 1,548 |
|                     | VASTY2     |                     |       |
|                     | VASTY2(1)  | ,841                | 2,163 |
|                     | VASTY2(2)  | 1,924               | 4,597 |
|                     | VASTY2(3)  | ,283                | ,925  |
|                     | VASTY2(4)  | ,845                | 2,184 |
|                     | VASTY2(5)  | ,430                | 1,307 |
|                     | VASTY2(6)  | ,163                | ,603  |
|                     | VASTY2(7)  | 2,300               | 5,388 |
|                     | VASTY2(8)  | ,897                | 2,306 |
|                     | VASTY2(9)  | ,819                | 2,148 |
|                     | VASTY2(10) | 1,596               | 3,882 |
|                     | VASTY2(11) | 1,601               | 3,838 |
|                     | VASTY2(12) | ,632                | 1,694 |
|                     | VASTY2(13) | 1,309               | 3,243 |
|                     | VASTY2(14) | ,432                | 1,241 |
|                     | VASTY2(15) | ,713                | 1,876 |
|                     | VASTY2(16) | ,712                | 2,219 |
|                     | VASTY2(17) | ,152                | ,616  |
|                     | VASTY2(18) | ,251                | ,909  |
|                     | VASTY2(19) | ,130                | ,602  |
|                     | VASTY2(20) | ,594                | 1,669 |
|                     | VASTY2(21) | ,534                | 1,497 |
|                     | VASTY2(22) | ,643                | 1,728 |
|                     | VASTY2(23) | 1,292               | 3,159 |
|                     | VASTY2(24) | 1,143               | 2,815 |
|                     | VASTY2(25) | ,651                | 1,844 |

review only

## Variables in the Equation

|            | B      | S.E. | Wald    | df | Sig. | Exp(B) |
|------------|--------|------|---------|----|------|--------|
| VASTY2(26) | -,851  | ,337 | 6,380   | 1  | ,012 | ,427   |
| VASTY2(27) | -1,338 | ,358 | 13,947  | 1  | ,000 | ,262   |
| VASTY2(28) | -1,106 | ,379 | 8,528   | 1  | ,003 | ,331   |
| VASTY2(29) | -1,159 | ,330 | 12,360  | 1  | ,000 | ,314   |
| VASTY2(30) | ,074   | ,253 | ,086    | 1  | ,770 | 1,077  |
| VASTY2(31) | ,627   | ,241 | 6,767   | 1  | ,009 | 1,871  |
| VASTY2(32) | ,051   | ,270 | ,035    | 1  | ,851 | 1,052  |
| VASTY2(33) | ,085   | ,269 | ,100    | 1  | ,752 | 1,089  |
| VASTY2(34) | -1,549 | ,401 | 14,941  | 1  | ,000 | ,212   |
| VASTY2(35) | ,435   | ,243 | 3,201   | 1  | ,074 | 1,545  |
| weekday    |        |      | 18,792  | 6  | ,005 |        |
| weekday(1) | -,023  | ,107 | ,046    | 1  | ,830 | ,977   |
| weekday(2) | -,055  | ,108 | ,260    | 1  | ,610 | ,946   |
| weekday(3) | ,024   | ,107 | ,051    | 1  | ,821 | 1,024  |
| weekday(4) | ,034   | ,107 | ,100    | 1  | ,752 | 1,035  |
| weekday(5) | -,402  | ,119 | 11,427  | 1  | ,001 | ,669   |
| weekday(6) | ,036   | ,108 | ,111    | 1  | ,739 | 1,037  |
| holiday(1) | -,481  | ,202 | 5,685   | 1  | ,017 | ,618   |
| season     |        |      | 14,175  | 4  | ,007 |        |
| season(1)  | -,078  | ,092 | ,711    | 1  | ,399 | ,925   |
| season(2)  | -,196  | ,088 | 4,969   | 1  | ,026 | ,822   |
| season(3)  | ,146   | ,088 | 2,772   | 1  | ,096 | 1,158  |
| season(4)  | -,031  | ,093 | ,113    | 1  | ,737 | ,969   |
| Constant   | -2,130 | ,209 | 103,891 | 1  | ,000 | ,119   |



## Variables in the Equation

|            | 95% C.I. for EXP(B) |       |
|------------|---------------------|-------|
|            | Lower               | Upper |
| VASTY2(26) | ,221                | ,826  |
| VASTY2(27) | ,130                | ,530  |
| VASTY2(28) | ,158                | ,695  |
| VASTY2(29) | ,164                | ,599  |
| VASTY2(30) | ,656                | 1,769 |
| VASTY2(31) | 1,167               | 3,001 |
| VASTY2(32) | ,620                | 1,786 |
| VASTY2(33) | ,643                | 1,844 |
| VASTY2(34) | ,097                | ,466  |
| VASTY2(35) | ,959                | 2,489 |
| weekday    |                     |       |
| weekday(1) | ,792                | 1,206 |
| weekday(2) | ,766                | 1,170 |
| weekday(3) | ,831                | 1,263 |
| weekday(4) | ,838                | 1,277 |
| weekday(5) | ,530                | ,844  |
| weekday(6) | ,839                | 1,281 |
| holiday(1) | ,417                | ,918  |
| season     |                     |       |
| season(1)  | ,772                | 1,108 |
| season(2)  | ,692                | ,977  |
| season(3)  | ,974                | 1,375 |
| season(4)  | ,807                | 1,164 |
| Constant   |                     |       |

a. Variable(s) entered on step 1: sv5, VASTY2, weekday, holiday, season.

```
LOGISTIC REGRESSION VARIABLES hand01
  /METHOD=ENTER sv7 VASTY2 weekday holiday season
  /CONTRAST (sv7)=Indicator(1)
  /CONTRAST (VASTY2)=Indicator(1)
  /CONTRAST (weekday)=Indicator(1)
  /CONTRAST (holiday)=Indicator(1)
  /CONTRAST (season)=Indicator(1)
  /PRINT=CI(95)
  /CRITERIA=PIN(0.05) POUT(0.10) ITERATE(20) CUT(0.5).
```

## Logistic Regression

[DataSet6] C:\cWordjan\Rafaela\_VCS\alla\_tillsammans\abo\_bjo\_vasa\_v1.sav

1  
2  
3  
4  
5  
6  
7  
8  
9  
10  
11  
12  
13  
14  
15  
16  
17  
18  
19  
20  
21  
22  
23  
24  
25  
26  
27  
28  
29  
30  
31  
32  
33  
34  
35  
36  
37  
38  
39  
40  
41  
42  
43  
44  
45  
46  
47  
48  
49  
50  
51  
52  
53  
54  
55  
56  
57  
58  
59  
60

### Case Processing Summary

| Unweighted Cases <sup>a</sup> |                      | N     | Percent |
|-------------------------------|----------------------|-------|---------|
| Selected Cases                | Included in Analysis | 12475 | 100,0   |
|                               | Missing Cases        | 0     | ,0      |
|                               | Total                | 12475 | 100,0   |
| Unselected Cases              |                      | 0     | ,0      |
| Total                         |                      | 12475 | 100,0   |

a. If weight is in effect, see classification table for the total number of cases.

### Dependent Variable Encoding

| Original Value      | Internal Value |
|---------------------|----------------|
| 0 ingen händelse    | 0              |
| 1 minst en händelse | 1              |

### Categorical Variables Codings

|                           | Frequency | Parameter |
|---------------------------|-----------|-----------|
|                           |           | (1)       |
| VASTY2 (SAIR*10000)+VASTY | 365       | ,000      |
| 403073101                 | 362       | 1,000     |
| 403073102                 | 365       | ,000      |
| 403073103                 | 365       | ,000      |
| 403073202                 | 365       | ,000      |
| 403073203                 | 330       | ,000      |
| 403073204                 | 364       | ,000      |
| 403073303                 | 362       | ,000      |
| 403073651                 | 365       | ,000      |
| 403073771                 | 341       | ,000      |
| 403133102                 | 365       | ,000      |
| 403133106                 | 365       | ,000      |
| 403133107                 | 365       | ,000      |
| 403133109                 | 365       | ,000      |
| 403133202                 | 365       | ,000      |
| 403133203                 | 365       | ,000      |
| 403133204                 | 365       | ,000      |
| 403133315                 | 177       | ,000      |
| 403133322                 | 365       | ,000      |
| 403133401                 | 362       | ,000      |
| 403133402                 | 365       | ,000      |
| 403133550                 | 298       | ,000      |
| 403133772                 | 365       | ,000      |
| 403135803                 | 365       | ,000      |
| 404060001                 | 365       | ,000      |
| 404060002                 | 366       | ,000      |
| 404310003                 | 291       | ,000      |
| 404310004                 | 291       | ,000      |

## Categorical Variables Codings

|                           |           | Parameter coding |       |
|---------------------------|-----------|------------------|-------|
|                           |           | (2)              | (3)   |
| VASTY2 (SAIR*10000)+VASTY | 403073101 | ,000             | ,000  |
|                           | 403073102 | ,000             | ,000  |
|                           | 403073103 | 1,000            | ,000  |
|                           | 403073202 | ,000             | 1,000 |
|                           | 403073203 | ,000             | ,000  |
|                           | 403073204 | ,000             | ,000  |
|                           | 403073303 | ,000             | ,000  |
|                           | 403073651 | ,000             | ,000  |
|                           | 403073771 | ,000             | ,000  |
|                           | 403133102 | ,000             | ,000  |
|                           | 403133106 | ,000             | ,000  |
|                           | 403133107 | ,000             | ,000  |
|                           | 403133109 | ,000             | ,000  |
|                           | 403133202 | ,000             | ,000  |
|                           | 403133203 | ,000             | ,000  |
|                           | 403133204 | ,000             | ,000  |
|                           | 403133315 | ,000             | ,000  |
|                           | 403133322 | ,000             | ,000  |
|                           | 403133401 | ,000             | ,000  |
|                           | 403133402 | ,000             | ,000  |
|                           | 403133550 | ,000             | ,000  |
|                           | 403133772 | ,000             | ,000  |
|                           | 403135803 | ,000             | ,000  |
|                           | 404060001 | ,000             | ,000  |
|                           | 404060002 | ,000             | ,000  |
|                           | 404310003 | ,000             | ,000  |
|                           | 404310004 | ,000             | ,000  |

## Categorical Variables Codings

|                           |           | Parameter coding |       |
|---------------------------|-----------|------------------|-------|
|                           |           | (4)              | (5)   |
| VASTY2 (SAIR*10000)+VASTY | 403073101 | ,000             | ,000  |
|                           | 403073102 | ,000             | ,000  |
|                           | 403073103 | ,000             | ,000  |
|                           | 403073202 | ,000             | ,000  |
|                           | 403073203 | 1,000            | ,000  |
|                           | 403073204 | ,000             | 1,000 |
|                           | 403073303 | ,000             | ,000  |
|                           | 403073651 | ,000             | ,000  |
|                           | 403073771 | ,000             | ,000  |
|                           | 403133102 | ,000             | ,000  |
|                           | 403133106 | ,000             | ,000  |
|                           | 403133107 | ,000             | ,000  |
|                           | 403133109 | ,000             | ,000  |
|                           | 403133202 | ,000             | ,000  |
|                           | 403133203 | ,000             | ,000  |
|                           | 403133204 | ,000             | ,000  |
|                           | 403133315 | ,000             | ,000  |
|                           | 403133322 | ,000             | ,000  |
|                           | 403133401 | ,000             | ,000  |
|                           | 403133402 | ,000             | ,000  |
|                           | 403133550 | ,000             | ,000  |
|                           | 403133772 | ,000             | ,000  |
|                           | 403135803 | ,000             | ,000  |
|                           | 404060001 | ,000             | ,000  |
|                           | 404060002 | ,000             | ,000  |
|                           | 404310003 | ,000             | ,000  |
|                           | 404310004 | ,000             | ,000  |

1  
2  
3  
4  
5  
6  
7  
8  
9  
10  
11  
12  
13  
14  
15  
16  
17  
18  
19  
20  
21  
22  
23  
24  
25  
26  
27  
28  
29  
30  
31  
32  
33  
34  
35  
36  
37  
38  
39  
40  
41  
42  
43  
44  
45  
46  
47  
48  
49  
50  
51  
52  
53  
54  
55  
56  
57  
58  
59  
60

**Categorical Variables Codings**

|                           |           | Parameter coding |       |
|---------------------------|-----------|------------------|-------|
|                           |           | (6)              | (7)   |
| VASTY2 (SAIR*10000)+VASTY | 403073101 | ,000             | ,000  |
|                           | 403073102 | ,000             | ,000  |
|                           | 403073103 | ,000             | ,000  |
|                           | 403073202 | ,000             | ,000  |
|                           | 403073203 | ,000             | ,000  |
|                           | 403073204 | ,000             | ,000  |
|                           | 403073303 | 1,000            | ,000  |
|                           | 403073651 | ,000             | 1,000 |
|                           | 403073771 | ,000             | ,000  |
|                           | 403133102 | ,000             | ,000  |
|                           | 403133106 | ,000             | ,000  |
|                           | 403133107 | ,000             | ,000  |
|                           | 403133109 | ,000             | ,000  |
|                           | 403133202 | ,000             | ,000  |
|                           | 403133203 | ,000             | ,000  |
|                           | 403133204 | ,000             | ,000  |
|                           | 403133315 | ,000             | ,000  |
|                           | 403133322 | ,000             | ,000  |
|                           | 403133401 | ,000             | ,000  |
|                           | 403133402 | ,000             | ,000  |
|                           | 403133550 | ,000             | ,000  |
|                           | 403133772 | ,000             | ,000  |
|                           | 403135803 | ,000             | ,000  |
|                           | 404060001 | ,000             | ,000  |
|                           | 404060002 | ,000             | ,000  |
|                           | 404310003 | ,000             | ,000  |
|                           | 404310004 | ,000             | ,000  |

## Categorical Variables Codings

|                           |           | Parameter coding |       |
|---------------------------|-----------|------------------|-------|
|                           |           | (8)              | (9)   |
| VASTY2 (SAIR*10000)+VASTY | 403073101 | ,000             | ,000  |
|                           | 403073102 | ,000             | ,000  |
|                           | 403073103 | ,000             | ,000  |
|                           | 403073202 | ,000             | ,000  |
|                           | 403073203 | ,000             | ,000  |
|                           | 403073204 | ,000             | ,000  |
|                           | 403073303 | ,000             | ,000  |
|                           | 403073651 | ,000             | ,000  |
|                           | 403073771 | 1,000            | ,000  |
|                           | 403133102 | ,000             | 1,000 |
|                           | 403133106 | ,000             | ,000  |
|                           | 403133107 | ,000             | ,000  |
|                           | 403133109 | ,000             | ,000  |
|                           | 403133202 | ,000             | ,000  |
|                           | 403133203 | ,000             | ,000  |
|                           | 403133204 | ,000             | ,000  |
|                           | 403133315 | ,000             | ,000  |
|                           | 403133322 | ,000             | ,000  |
|                           | 403133401 | ,000             | ,000  |
|                           | 403133402 | ,000             | ,000  |
|                           | 403133550 | ,000             | ,000  |
|                           | 403133772 | ,000             | ,000  |
|                           | 403135803 | ,000             | ,000  |
|                           | 404060001 | ,000             | ,000  |
|                           | 404060002 | ,000             | ,000  |
|                           | 404310003 | ,000             | ,000  |
|                           | 404310004 | ,000             | ,000  |

## Categorical Variables Codings

|                           |           | Parameter coding |       |
|---------------------------|-----------|------------------|-------|
|                           |           | (10)             | (11)  |
| VASTY2 (SAIR*10000)+VASTY | 403073101 | ,000             | ,000  |
|                           | 403073102 | ,000             | ,000  |
|                           | 403073103 | ,000             | ,000  |
|                           | 403073202 | ,000             | ,000  |
|                           | 403073203 | ,000             | ,000  |
|                           | 403073204 | ,000             | ,000  |
|                           | 403073303 | ,000             | ,000  |
|                           | 403073651 | ,000             | ,000  |
|                           | 403073771 | ,000             | ,000  |
|                           | 403133102 | ,000             | ,000  |
|                           | 403133106 | 1,000            | ,000  |
|                           | 403133107 | ,000             | 1,000 |
|                           | 403133109 | ,000             | ,000  |
|                           | 403133202 | ,000             | ,000  |
|                           | 403133203 | ,000             | ,000  |
|                           | 403133204 | ,000             | ,000  |
|                           | 403133315 | ,000             | ,000  |
|                           | 403133322 | ,000             | ,000  |
|                           | 403133401 | ,000             | ,000  |
|                           | 403133402 | ,000             | ,000  |
|                           | 403133550 | ,000             | ,000  |
|                           | 403133772 | ,000             | ,000  |
|                           | 403135803 | ,000             | ,000  |
|                           | 404060001 | ,000             | ,000  |
|                           | 404060002 | ,000             | ,000  |
|                           | 404310003 | ,000             | ,000  |
|                           | 404310004 | ,000             | ,000  |

## Categorical Variables Codings

|                           |           | Parameter coding |       |
|---------------------------|-----------|------------------|-------|
|                           |           | (12)             | (13)  |
| VASTY2 (SAIR*10000)+VASTY | 403073101 | ,000             | ,000  |
|                           | 403073102 | ,000             | ,000  |
|                           | 403073103 | ,000             | ,000  |
|                           | 403073202 | ,000             | ,000  |
|                           | 403073203 | ,000             | ,000  |
|                           | 403073204 | ,000             | ,000  |
|                           | 403073303 | ,000             | ,000  |
|                           | 403073651 | ,000             | ,000  |
|                           | 403073771 | ,000             | ,000  |
|                           | 403133102 | ,000             | ,000  |
|                           | 403133106 | ,000             | ,000  |
|                           | 403133107 | ,000             | ,000  |
|                           | 403133109 | 1,000            | ,000  |
|                           | 403133202 | ,000             | 1,000 |
|                           | 403133203 | ,000             | ,000  |
|                           | 403133204 | ,000             | ,000  |
|                           | 403133315 | ,000             | ,000  |
|                           | 403133322 | ,000             | ,000  |
|                           | 403133401 | ,000             | ,000  |
|                           | 403133402 | ,000             | ,000  |
|                           | 403133550 | ,000             | ,000  |
|                           | 403133772 | ,000             | ,000  |
|                           | 403135803 | ,000             | ,000  |
|                           | 404060001 | ,000             | ,000  |
|                           | 404060002 | ,000             | ,000  |
|                           | 404310003 | ,000             | ,000  |
|                           | 404310004 | ,000             | ,000  |



1  
2  
3  
4  
5  
6  
7  
8  
9  
10  
11  
12  
13  
14  
15  
16  
17  
18  
19  
20  
21  
22  
23  
24  
25  
26  
27  
28  
29  
30  
31  
32  
33  
34  
35  
36  
37  
38  
39  
40  
41  
42  
43  
44  
45  
46  
47  
48  
49  
50  
51  
52  
53  
54  
55  
56  
57  
58  
59  
60

**Categorical Variables Codings**

|                           |           | Parameter coding |       |
|---------------------------|-----------|------------------|-------|
|                           |           | (14)             | (15)  |
| VASTY2 (SAIR*10000)+VASTY | 403073101 | ,000             | ,000  |
|                           | 403073102 | ,000             | ,000  |
|                           | 403073103 | ,000             | ,000  |
|                           | 403073202 | ,000             | ,000  |
|                           | 403073203 | ,000             | ,000  |
|                           | 403073204 | ,000             | ,000  |
|                           | 403073303 | ,000             | ,000  |
|                           | 403073651 | ,000             | ,000  |
|                           | 403073771 | ,000             | ,000  |
|                           | 403133102 | ,000             | ,000  |
|                           | 403133106 | ,000             | ,000  |
|                           | 403133107 | ,000             | ,000  |
|                           | 403133109 | ,000             | ,000  |
|                           | 403133202 | ,000             | ,000  |
|                           | 403133203 | 1,000            | ,000  |
|                           | 403133204 | ,000             | 1,000 |
|                           | 403133315 | ,000             | ,000  |
|                           | 403133322 | ,000             | ,000  |
|                           | 403133401 | ,000             | ,000  |
|                           | 403133402 | ,000             | ,000  |
|                           | 403133550 | ,000             | ,000  |
|                           | 403133772 | ,000             | ,000  |
|                           | 403135803 | ,000             | ,000  |
|                           | 404060001 | ,000             | ,000  |
|                           | 404060002 | ,000             | ,000  |
|                           | 404310003 | ,000             | ,000  |
|                           | 404310004 | ,000             | ,000  |

## Categorical Variables Codings

|                           |           | Parameter coding |       |
|---------------------------|-----------|------------------|-------|
|                           |           | (16)             | (17)  |
| VASTY2 (SAIR*10000)+VASTY | 403073101 | ,000             | ,000  |
|                           | 403073102 | ,000             | ,000  |
|                           | 403073103 | ,000             | ,000  |
|                           | 403073202 | ,000             | ,000  |
|                           | 403073203 | ,000             | ,000  |
|                           | 403073204 | ,000             | ,000  |
|                           | 403073303 | ,000             | ,000  |
|                           | 403073651 | ,000             | ,000  |
|                           | 403073771 | ,000             | ,000  |
|                           | 403133102 | ,000             | ,000  |
|                           | 403133106 | ,000             | ,000  |
|                           | 403133107 | ,000             | ,000  |
|                           | 403133109 | ,000             | ,000  |
|                           | 403133202 | ,000             | ,000  |
|                           | 403133203 | ,000             | ,000  |
|                           | 403133204 | ,000             | ,000  |
|                           | 403133315 | 1,000            | ,000  |
|                           | 403133322 | ,000             | 1,000 |
|                           | 403133401 | ,000             | ,000  |
|                           | 403133402 | ,000             | ,000  |
|                           | 403133550 | ,000             | ,000  |
|                           | 403133772 | ,000             | ,000  |
|                           | 403135803 | ,000             | ,000  |
|                           | 404060001 | ,000             | ,000  |
|                           | 404060002 | ,000             | ,000  |
|                           | 404310003 | ,000             | ,000  |
|                           | 404310004 | ,000             | ,000  |

1  
2  
3  
4  
5  
6  
7  
8  
9  
10  
11  
12  
13  
14  
15  
16  
17  
18  
19  
20  
21  
22  
23  
24  
25  
26  
27  
28  
29  
30  
31  
32  
33  
34  
35  
36  
37  
38  
39  
40  
41  
42  
43  
44  
45  
46  
47  
48  
49  
50  
51  
52  
53  
54  
55  
56  
57  
58  
59  
60

**Categorical Variables Codings**

|                           |           | Parameter coding |       |
|---------------------------|-----------|------------------|-------|
|                           |           | (18)             | (19)  |
| VASTY2 (SAIR*10000)+VASTY | 403073101 | ,000             | ,000  |
|                           | 403073102 | ,000             | ,000  |
|                           | 403073103 | ,000             | ,000  |
|                           | 403073202 | ,000             | ,000  |
|                           | 403073203 | ,000             | ,000  |
|                           | 403073204 | ,000             | ,000  |
|                           | 403073303 | ,000             | ,000  |
|                           | 403073651 | ,000             | ,000  |
|                           | 403073771 | ,000             | ,000  |
|                           | 403133102 | ,000             | ,000  |
|                           | 403133106 | ,000             | ,000  |
|                           | 403133107 | ,000             | ,000  |
|                           | 403133109 | ,000             | ,000  |
|                           | 403133202 | ,000             | ,000  |
|                           | 403133203 | ,000             | ,000  |
|                           | 403133204 | ,000             | ,000  |
|                           | 403133315 | ,000             | ,000  |
|                           | 403133322 | ,000             | ,000  |
|                           | 403133401 | 1,000            | ,000  |
|                           | 403133402 | ,000             | 1,000 |
|                           | 403133550 | ,000             | ,000  |
|                           | 403133772 | ,000             | ,000  |
|                           | 403135803 | ,000             | ,000  |
|                           | 404060001 | ,000             | ,000  |
|                           | 404060002 | ,000             | ,000  |
|                           | 404310003 | ,000             | ,000  |
|                           | 404310004 | ,000             | ,000  |

## Categorical Variables Codings

|                           |           | Parameter coding |       |
|---------------------------|-----------|------------------|-------|
|                           |           | (20)             | (21)  |
| VASTY2 (SAIR*10000)+VASTY | 403073101 | ,000             | ,000  |
|                           | 403073102 | ,000             | ,000  |
|                           | 403073103 | ,000             | ,000  |
|                           | 403073202 | ,000             | ,000  |
|                           | 403073203 | ,000             | ,000  |
|                           | 403073204 | ,000             | ,000  |
|                           | 403073303 | ,000             | ,000  |
|                           | 403073651 | ,000             | ,000  |
|                           | 403073771 | ,000             | ,000  |
|                           | 403133102 | ,000             | ,000  |
|                           | 403133106 | ,000             | ,000  |
|                           | 403133107 | ,000             | ,000  |
|                           | 403133109 | ,000             | ,000  |
|                           | 403133202 | ,000             | ,000  |
|                           | 403133203 | ,000             | ,000  |
|                           | 403133204 | ,000             | ,000  |
|                           | 403133315 | ,000             | ,000  |
|                           | 403133322 | ,000             | ,000  |
|                           | 403133401 | ,000             | ,000  |
|                           | 403133402 | ,000             | ,000  |
|                           | 403133550 | 1,000            | ,000  |
|                           | 403133772 | ,000             | 1,000 |
|                           | 403135803 | ,000             | ,000  |
|                           | 404060001 | ,000             | ,000  |
|                           | 404060002 | ,000             | ,000  |
|                           | 404310003 | ,000             | ,000  |
|                           | 404310004 | ,000             | ,000  |

1  
2  
3  
4  
5  
6  
7  
8  
9  
10  
11  
12  
13  
14  
15  
16  
17  
18  
19  
20  
21  
22  
23  
24  
25  
26  
27  
28  
29  
30  
31  
32  
33  
34  
35  
36  
37  
38  
39  
40  
41  
42  
43  
44  
45  
46  
47  
48  
49  
50  
51  
52  
53  
54  
55  
56  
57  
58  
59  
60

**Categorical Variables Codings**

|                           |           | Parameter coding |       |
|---------------------------|-----------|------------------|-------|
|                           |           | (22)             | (23)  |
| VASTY2 (SAIR*10000)+VASTY | 403073101 | ,000             | ,000  |
|                           | 403073102 | ,000             | ,000  |
|                           | 403073103 | ,000             | ,000  |
|                           | 403073202 | ,000             | ,000  |
|                           | 403073203 | ,000             | ,000  |
|                           | 403073204 | ,000             | ,000  |
|                           | 403073303 | ,000             | ,000  |
|                           | 403073651 | ,000             | ,000  |
|                           | 403073771 | ,000             | ,000  |
|                           | 403133102 | ,000             | ,000  |
|                           | 403133106 | ,000             | ,000  |
|                           | 403133107 | ,000             | ,000  |
|                           | 403133109 | ,000             | ,000  |
|                           | 403133202 | ,000             | ,000  |
|                           | 403133203 | ,000             | ,000  |
|                           | 403133204 | ,000             | ,000  |
|                           | 403133315 | ,000             | ,000  |
|                           | 403133322 | ,000             | ,000  |
|                           | 403133401 | ,000             | ,000  |
|                           | 403133402 | ,000             | ,000  |
|                           | 403133550 | ,000             | ,000  |
|                           | 403133772 | ,000             | ,000  |
|                           | 403135803 | 1,000            | ,000  |
|                           | 404060001 | ,000             | 1,000 |
|                           | 404060002 | ,000             | ,000  |
|                           | 404310003 | ,000             | ,000  |
|                           | 404310004 | ,000             | ,000  |

## Categorical Variables Codings

|                           |           | Parameter coding |       |
|---------------------------|-----------|------------------|-------|
|                           |           | (24)             | (25)  |
| VASTY2 (SAIR*10000)+VASTY | 403073101 | ,000             | ,000  |
|                           | 403073102 | ,000             | ,000  |
|                           | 403073103 | ,000             | ,000  |
|                           | 403073202 | ,000             | ,000  |
|                           | 403073203 | ,000             | ,000  |
|                           | 403073204 | ,000             | ,000  |
|                           | 403073303 | ,000             | ,000  |
|                           | 403073651 | ,000             | ,000  |
|                           | 403073771 | ,000             | ,000  |
|                           | 403133102 | ,000             | ,000  |
|                           | 403133106 | ,000             | ,000  |
|                           | 403133107 | ,000             | ,000  |
|                           | 403133109 | ,000             | ,000  |
|                           | 403133202 | ,000             | ,000  |
|                           | 403133203 | ,000             | ,000  |
|                           | 403133204 | ,000             | ,000  |
|                           | 403133315 | ,000             | ,000  |
|                           | 403133322 | ,000             | ,000  |
|                           | 403133401 | ,000             | ,000  |
|                           | 403133402 | ,000             | ,000  |
|                           | 403133550 | ,000             | ,000  |
|                           | 403133772 | ,000             | ,000  |
|                           | 403135803 | ,000             | ,000  |
|                           | 404060001 | ,000             | ,000  |
|                           | 404060002 | 1,000            | ,000  |
|                           | 404310003 | ,000             | 1,000 |
|                           | 404310004 | ,000             | ,000  |

## Categorical Variables Codings

|                           |           | Parameter coding |      |
|---------------------------|-----------|------------------|------|
|                           |           | (26)             | (27) |
| VASTY2 (SAIR*10000)+VASTY | 403073101 | ,000             | ,000 |
|                           | 403073102 | ,000             | ,000 |
|                           | 403073103 | ,000             | ,000 |
|                           | 403073202 | ,000             | ,000 |
|                           | 403073203 | ,000             | ,000 |
|                           | 403073204 | ,000             | ,000 |
|                           | 403073303 | ,000             | ,000 |
|                           | 403073651 | ,000             | ,000 |
|                           | 403073771 | ,000             | ,000 |
|                           | 403133102 | ,000             | ,000 |
|                           | 403133106 | ,000             | ,000 |
|                           | 403133107 | ,000             | ,000 |
|                           | 403133109 | ,000             | ,000 |
|                           | 403133202 | ,000             | ,000 |
|                           | 403133203 | ,000             | ,000 |
|                           | 403133204 | ,000             | ,000 |
|                           | 403133315 | ,000             | ,000 |
|                           | 403133322 | ,000             | ,000 |
|                           | 403133401 | ,000             | ,000 |
|                           | 403133402 | ,000             | ,000 |
|                           | 403133550 | ,000             | ,000 |
|                           | 403133772 | ,000             | ,000 |
|                           | 403135803 | ,000             | ,000 |
|                           | 404060001 | ,000             | ,000 |
|                           | 404060002 | ,000             | ,000 |
|                           | 404310003 | ,000             | ,000 |
|                           | 404310004 | 1,000            | ,000 |

## Categorical Variables Codings

|                           |           | Parameter coding |      |
|---------------------------|-----------|------------------|------|
|                           |           | (28)             | (29) |
| VASTY2 (SAIR*10000)+VASTY | 403073101 | ,000             | ,000 |
|                           | 403073102 | ,000             | ,000 |
|                           | 403073103 | ,000             | ,000 |
|                           | 403073202 | ,000             | ,000 |
|                           | 403073203 | ,000             | ,000 |
|                           | 403073204 | ,000             | ,000 |
|                           | 403073303 | ,000             | ,000 |
|                           | 403073651 | ,000             | ,000 |
|                           | 403073771 | ,000             | ,000 |
|                           | 403133102 | ,000             | ,000 |
|                           | 403133106 | ,000             | ,000 |
|                           | 403133107 | ,000             | ,000 |
|                           | 403133109 | ,000             | ,000 |
|                           | 403133202 | ,000             | ,000 |
|                           | 403133203 | ,000             | ,000 |
|                           | 403133204 | ,000             | ,000 |
|                           | 403133315 | ,000             | ,000 |
|                           | 403133322 | ,000             | ,000 |
|                           | 403133401 | ,000             | ,000 |
|                           | 403133402 | ,000             | ,000 |
|                           | 403133550 | ,000             | ,000 |
|                           | 403133772 | ,000             | ,000 |
|                           | 403135803 | ,000             | ,000 |
|                           | 404060001 | ,000             | ,000 |
|                           | 404060002 | ,000             | ,000 |
|                           | 404310003 | ,000             | ,000 |
|                           | 404310004 | ,000             | ,000 |



1  
2  
3  
4  
5  
6  
7  
8  
9  
10  
11  
12  
13  
14  
15  
16  
17  
18  
19  
20  
21  
22  
23  
24  
25  
26  
27  
28  
29  
30  
31  
32  
33  
34  
35  
36  
37  
38  
39  
40  
41  
42  
43  
44  
45  
46  
47  
48  
49  
50  
51  
52  
53  
54  
55  
56  
57  
58  
59  
60

**Categorical Variables Codings**

|                           |           | Parameter coding |      |
|---------------------------|-----------|------------------|------|
|                           |           | (30)             | (31) |
| VASTY2 (SAIR*10000)+VASTY | 403073101 | ,000             | ,000 |
|                           | 403073102 | ,000             | ,000 |
|                           | 403073103 | ,000             | ,000 |
|                           | 403073202 | ,000             | ,000 |
|                           | 403073203 | ,000             | ,000 |
|                           | 403073204 | ,000             | ,000 |
|                           | 403073303 | ,000             | ,000 |
|                           | 403073651 | ,000             | ,000 |
|                           | 403073771 | ,000             | ,000 |
|                           | 403133102 | ,000             | ,000 |
|                           | 403133106 | ,000             | ,000 |
|                           | 403133107 | ,000             | ,000 |
|                           | 403133109 | ,000             | ,000 |
|                           | 403133202 | ,000             | ,000 |
|                           | 403133203 | ,000             | ,000 |
|                           | 403133204 | ,000             | ,000 |
|                           | 403133315 | ,000             | ,000 |
|                           | 403133322 | ,000             | ,000 |
|                           | 403133401 | ,000             | ,000 |
|                           | 403133402 | ,000             | ,000 |
|                           | 403133550 | ,000             | ,000 |
|                           | 403133772 | ,000             | ,000 |
|                           | 403135803 | ,000             | ,000 |
|                           | 404060001 | ,000             | ,000 |
|                           | 404060002 | ,000             | ,000 |
|                           | 404310003 | ,000             | ,000 |
|                           | 404310004 | ,000             | ,000 |

## Categorical Variables Codings

|                           |           | Parameter coding |      |
|---------------------------|-----------|------------------|------|
|                           |           | (32)             | (33) |
| VASTY2 (SAIR*10000)+VASTY | 403073101 | ,000             | ,000 |
|                           | 403073102 | ,000             | ,000 |
|                           | 403073103 | ,000             | ,000 |
|                           | 403073202 | ,000             | ,000 |
|                           | 403073203 | ,000             | ,000 |
|                           | 403073204 | ,000             | ,000 |
|                           | 403073303 | ,000             | ,000 |
|                           | 403073651 | ,000             | ,000 |
|                           | 403073771 | ,000             | ,000 |
|                           | 403133102 | ,000             | ,000 |
|                           | 403133106 | ,000             | ,000 |
|                           | 403133107 | ,000             | ,000 |
|                           | 403133109 | ,000             | ,000 |
|                           | 403133202 | ,000             | ,000 |
|                           | 403133203 | ,000             | ,000 |
|                           | 403133204 | ,000             | ,000 |
|                           | 403133315 | ,000             | ,000 |
|                           | 403133322 | ,000             | ,000 |
|                           | 403133401 | ,000             | ,000 |
|                           | 403133402 | ,000             | ,000 |
|                           | 403133550 | ,000             | ,000 |
|                           | 403133772 | ,000             | ,000 |
|                           | 403135803 | ,000             | ,000 |
|                           | 404060001 | ,000             | ,000 |
|                           | 404060002 | ,000             | ,000 |
|                           | 404310003 | ,000             | ,000 |
|                           | 404310004 | ,000             | ,000 |

1  
2  
3  
4  
5  
6  
7  
8  
9  
10  
11  
12  
13  
14  
15  
16  
17  
18  
19  
20  
21  
22  
23  
24  
25  
26  
27  
28  
29  
30  
31  
32  
33  
34  
35  
36  
37  
38  
39  
40  
41  
42  
43  
44  
45  
46  
47  
48  
49  
50  
51  
52  
53  
54  
55  
56  
57  
58  
59  
60

**Categorical Variables Codings**

|                           |           | Parameter coding |      |
|---------------------------|-----------|------------------|------|
|                           |           | (34)             | (35) |
| VASTY2 (SAIR*10000)+VASTY | 403073101 | ,000             | ,000 |
|                           | 403073102 | ,000             | ,000 |
|                           | 403073103 | ,000             | ,000 |
|                           | 403073202 | ,000             | ,000 |
|                           | 403073203 | ,000             | ,000 |
|                           | 403073204 | ,000             | ,000 |
|                           | 403073303 | ,000             | ,000 |
|                           | 403073651 | ,000             | ,000 |
|                           | 403073771 | ,000             | ,000 |
|                           | 403133102 | ,000             | ,000 |
|                           | 403133106 | ,000             | ,000 |
|                           | 403133107 | ,000             | ,000 |
|                           | 403133109 | ,000             | ,000 |
|                           | 403133202 | ,000             | ,000 |
|                           | 403133203 | ,000             | ,000 |
|                           | 403133204 | ,000             | ,000 |
|                           | 403133315 | ,000             | ,000 |
|                           | 403133322 | ,000             | ,000 |
|                           | 403133401 | ,000             | ,000 |
|                           | 403133402 | ,000             | ,000 |
|                           | 403133550 | ,000             | ,000 |
|                           | 403133772 | ,000             | ,000 |
|                           | 403135803 | ,000             | ,000 |
|                           | 404060001 | ,000             | ,000 |
|                           | 404060002 | ,000             | ,000 |
|                           | 404310003 | ,000             | ,000 |
|                           | 404310004 | ,000             | ,000 |

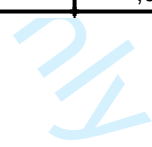

## Categorical Variables Codings

|                              |                                         | Frequency | Parameter<br>(1) |
|------------------------------|-----------------------------------------|-----------|------------------|
|                              | 502300005                               | 366       | ,000             |
|                              | 502300006                               | 225       | ,000             |
|                              | 502300007                               | 366       | ,000             |
|                              | 502300214                               | 366       | ,000             |
|                              | 502300411                               | 366       | ,000             |
|                              | 502300415                               | 360       | ,000             |
|                              | 502300416                               | 363       | ,000             |
|                              | 502300811                               | 364       | ,000             |
|                              | 502300913                               | 315       | ,000             |
| weekday veckodag             | 1 måndag                                | 1805      | ,000             |
|                              | 2 tisdag                                | 1812      | 1,000            |
|                              | 3 onsdag                                | 1800      | ,000             |
|                              | 4 torsdag                               | 1794      | ,000             |
|                              | 5 fredag                                | 1788      | ,000             |
|                              | 6 lördag                                | 1735      | ,000             |
|                              | 7 söndag                                | 1741      | ,000             |
| sv7 sjättedelar för standard | 1 fjärde sjundedelen                    | 1423      | ,000             |
|                              | 2 första sjundedelen                    | 3031      | 1,000            |
|                              | 3 andra sjundedelen                     | 1238      | ,000             |
|                              | 4 tredje sjundedelen                    | 1255      | ,000             |
|                              | 5 femte sjundedelen                     | 1445      | ,000             |
|                              | 6 sjätte sjundedelen                    | 1948      | ,000             |
|                              | 7 sjunde sjundedelen                    | 2135      | ,000             |
| season säsong/period         | 1 januari-mars                          | 3182      | ,000             |
|                              | 2 april-maj                             | 2127      | 1,000            |
|                              | 3 juni-augusti                          | 2911      | ,000             |
|                              | 4 september-oktober                     | 2144      | ,000             |
|                              | 5 november-december                     | 2111      | ,000             |
| holiday större helg          | 1 ingen större helg                     | 12078     | ,000             |
|                              | 2 större helg (påsk/midsommar/julonyår) | 397       | 1,000            |

## Categorical Variables Codings

|                              |                                         | Parameter coding |       |
|------------------------------|-----------------------------------------|------------------|-------|
|                              |                                         | (2)              | (3)   |
|                              | 502300005                               | ,000             | ,000  |
|                              | 502300006                               | ,000             | ,000  |
|                              | 502300007                               | ,000             | ,000  |
|                              | 502300214                               | ,000             | ,000  |
|                              | 502300411                               | ,000             | ,000  |
|                              | 502300415                               | ,000             | ,000  |
|                              | 502300416                               | ,000             | ,000  |
|                              | 502300811                               | ,000             | ,000  |
|                              | 502300913                               | ,000             | ,000  |
| weekday veckodag             | 1 måndag                                | ,000             | ,000  |
|                              | 2 tisdag                                | ,000             | ,000  |
|                              | 3 onsdag                                | 1,000            | ,000  |
|                              | 4 torsdag                               | ,000             | 1,000 |
|                              | 5 fredag                                | ,000             | ,000  |
|                              | 6 lördag                                | ,000             | ,000  |
|                              | 7 söndag                                | ,000             | ,000  |
| sv7 sjättedelar för standard | 1 fjärde sjundedelen                    | ,000             | ,000  |
|                              | 2 första sjundedelen                    | ,000             | ,000  |
|                              | 3 andra sjundedelen                     | 1,000            | ,000  |
|                              | 4 tredje sjundedelen                    | ,000             | 1,000 |
|                              | 5 femte sjundedelen                     | ,000             | ,000  |
|                              | 6 sjätte sjundedelen                    | ,000             | ,000  |
|                              | 7 sjunde sjundedelen                    | ,000             | ,000  |
| season säsong/period         | 1 januari-mars                          | ,000             | ,000  |
|                              | 2 april-maj                             | ,000             | ,000  |
|                              | 3 juni-augusti                          | 1,000            | ,000  |
|                              | 4 september-oktober                     | ,000             | 1,000 |
|                              | 5 november-december                     | ,000             | ,000  |
| holiday större helg          | 1 ingen större helg                     |                  |       |
|                              | 2 större helg (påsk/midsommar/julonyår) |                  |       |

## Categorical Variables Codings

|                              |                                         | Parameter coding |       |
|------------------------------|-----------------------------------------|------------------|-------|
|                              |                                         | (4)              | (5)   |
|                              | 502300005                               | ,000             | ,000  |
|                              | 502300006                               | ,000             | ,000  |
|                              | 502300007                               | ,000             | ,000  |
|                              | 502300214                               | ,000             | ,000  |
|                              | 502300411                               | ,000             | ,000  |
|                              | 502300415                               | ,000             | ,000  |
|                              | 502300416                               | ,000             | ,000  |
|                              | 502300811                               | ,000             | ,000  |
|                              | 502300913                               | ,000             | ,000  |
| weekday veckodag             | 1 måndag                                | ,000             | ,000  |
|                              | 2 tisdag                                | ,000             | ,000  |
|                              | 3 onsdag                                | ,000             | ,000  |
|                              | 4 torsdag                               | ,000             | ,000  |
|                              | 5 fredag                                | 1,000            | ,000  |
|                              | 6 lördag                                | ,000             | 1,000 |
|                              | 7 söndag                                | ,000             | ,000  |
| sv7 sjättedelar för standard | 1 fjärde sjundedelen                    | ,000             | ,000  |
|                              | 2 första sjundedelen                    | ,000             | ,000  |
|                              | 3 andra sjundedelen                     | ,000             | ,000  |
|                              | 4 tredje sjundedelen                    | ,000             | ,000  |
|                              | 5 femte sjundedelen                     | 1,000            | ,000  |
|                              | 6 sjätte sjundedelen                    | ,000             | 1,000 |
|                              | 7 sjunde sjundedelen                    | ,000             | ,000  |
| season säsong/period         | 1 januari-mars                          | ,000             |       |
|                              | 2 april-maj                             | ,000             |       |
|                              | 3 juni-augusti                          | ,000             |       |
|                              | 4 september-oktober                     | ,000             |       |
|                              | 5 november-december                     | 1,000            |       |
| holiday större helg          | 1 ingen större helg                     |                  |       |
|                              | 2 större helg (påsk/midsommar/julonyår) |                  |       |

## Categorical Variables Codings

|                              |                                         | Parameter coding |      |
|------------------------------|-----------------------------------------|------------------|------|
|                              |                                         | (6)              | (7)  |
|                              | 502300005                               | ,000             | ,000 |
|                              | 502300006                               | ,000             | ,000 |
|                              | 502300007                               | ,000             | ,000 |
|                              | 502300214                               | ,000             | ,000 |
|                              | 502300411                               | ,000             | ,000 |
|                              | 502300415                               | ,000             | ,000 |
|                              | 502300416                               | ,000             | ,000 |
|                              | 502300811                               | ,000             | ,000 |
|                              | 502300913                               | ,000             | ,000 |
| weekday veckodag             | 1 måndag                                | ,000             |      |
|                              | 2 tisdag                                | ,000             |      |
|                              | 3 onsdag                                | ,000             |      |
|                              | 4 torsdag                               | ,000             |      |
|                              | 5 fredag                                | ,000             |      |
|                              | 6 lördag                                | ,000             |      |
|                              | 7 söndag                                | 1,000            |      |
| sv7 sjättedelar för standard | 1 fjärde sjundedelen                    | ,000             |      |
|                              | 2 första sjundedelen                    | ,000             |      |
|                              | 3 andra sjundedelen                     | ,000             |      |
|                              | 4 tredje sjundedelen                    | ,000             |      |
|                              | 5 femte sjundedelen                     | ,000             |      |
|                              | 6 sjätte sjundedelen                    | ,000             |      |
|                              | 7 sjunde sjundedelen                    | 1,000            |      |
| season säsong/period         | 1 januari-mars                          |                  |      |
|                              | 2 april-maj                             |                  |      |
|                              | 3 juni-augusti                          |                  |      |
|                              | 4 september-oktober                     |                  |      |
|                              | 5 november-december                     |                  |      |
| holiday större helg          | 1 ingen större helg                     |                  |      |
|                              | 2 större helg (påsk/midsommar/julonyår) |                  |      |

## Categorical Variables Codings

|                              |                                         | Parameter coding |      |
|------------------------------|-----------------------------------------|------------------|------|
|                              |                                         | (8)              | (9)  |
|                              | 502300005                               | ,000             | ,000 |
|                              | 502300006                               | ,000             | ,000 |
|                              | 502300007                               | ,000             | ,000 |
|                              | 502300214                               | ,000             | ,000 |
|                              | 502300411                               | ,000             | ,000 |
|                              | 502300415                               | ,000             | ,000 |
|                              | 502300416                               | ,000             | ,000 |
|                              | 502300811                               | ,000             | ,000 |
|                              | 502300913                               | ,000             | ,000 |
| weekday veckodag             | 1 måndag                                |                  |      |
|                              | 2 tisdag                                |                  |      |
|                              | 3 onsdag                                |                  |      |
|                              | 4 torsdag                               |                  |      |
|                              | 5 fredag                                |                  |      |
|                              | 6 lördag                                |                  |      |
|                              | 7 söndag                                |                  |      |
| sv7 sjättedelar för standard | 1 fjärde sjundedelen                    |                  |      |
|                              | 2 första sjundedelen                    |                  |      |
|                              | 3 andra sjundedelen                     |                  |      |
|                              | 4 tredje sjundedelen                    |                  |      |
|                              | 5 femte sjundedelen                     |                  |      |
|                              | 6 sjätte sjundedelen                    |                  |      |
|                              | 7 sjunde sjundedelen                    |                  |      |
| season säsong/period         | 1 januari-mars                          |                  |      |
|                              | 2 april-maj                             |                  |      |
|                              | 3 juni-augusti                          |                  |      |
|                              | 4 september-oktober                     |                  |      |
|                              | 5 november-december                     |                  |      |
| holiday större helg          | 1 ingen större helg                     |                  |      |
|                              | 2 större helg (påsk/midsommar/julonyår) |                  |      |



## Categorical Variables Codings

|                              |                                         | Parameter coding |      |
|------------------------------|-----------------------------------------|------------------|------|
|                              |                                         | (10)             | (11) |
|                              | 502300005                               | ,000             | ,000 |
|                              | 502300006                               | ,000             | ,000 |
|                              | 502300007                               | ,000             | ,000 |
|                              | 502300214                               | ,000             | ,000 |
|                              | 502300411                               | ,000             | ,000 |
|                              | 502300415                               | ,000             | ,000 |
|                              | 502300416                               | ,000             | ,000 |
|                              | 502300811                               | ,000             | ,000 |
|                              | 502300913                               | ,000             | ,000 |
| weekday veckodag             | 1 måndag                                |                  |      |
|                              | 2 tisdag                                |                  |      |
|                              | 3 onsdag                                |                  |      |
|                              | 4 torsdag                               |                  |      |
|                              | 5 fredag                                |                  |      |
|                              | 6 lördag                                |                  |      |
|                              | 7 söndag                                |                  |      |
| sv7 sjättedelar för standard | 1 fjärde sjundedelen                    |                  |      |
|                              | 2 första sjundedelen                    |                  |      |
|                              | 3 andra sjundedelen                     |                  |      |
|                              | 4 tredje sjundedelen                    |                  |      |
|                              | 5 femte sjundedelen                     |                  |      |
|                              | 6 sjätte sjundedelen                    |                  |      |
|                              | 7 sjunde sjundedelen                    |                  |      |
| season säsong/period         | 1 januari-mars                          |                  |      |
|                              | 2 april-maj                             |                  |      |
|                              | 3 juni-augusti                          |                  |      |
|                              | 4 september-oktober                     |                  |      |
|                              | 5 november-december                     |                  |      |
| holiday större helg          | 1 ingen större helg                     |                  |      |
|                              | 2 större helg (påsk/midsommar/julonyår) |                  |      |

## Categorical Variables Codings

|                              |                                         | Parameter coding |      |
|------------------------------|-----------------------------------------|------------------|------|
|                              |                                         | (12)             | (13) |
|                              | 502300005                               | ,000             | ,000 |
|                              | 502300006                               | ,000             | ,000 |
|                              | 502300007                               | ,000             | ,000 |
|                              | 502300214                               | ,000             | ,000 |
|                              | 502300411                               | ,000             | ,000 |
|                              | 502300415                               | ,000             | ,000 |
|                              | 502300416                               | ,000             | ,000 |
|                              | 502300811                               | ,000             | ,000 |
|                              | 502300913                               | ,000             | ,000 |
| weekday veckodag             | 1 måndag                                |                  |      |
|                              | 2 tisdag                                |                  |      |
|                              | 3 onsdag                                |                  |      |
|                              | 4 torsdag                               |                  |      |
|                              | 5 fredag                                |                  |      |
|                              | 6 lördag                                |                  |      |
|                              | 7 söndag                                |                  |      |
| sv7 sjättedelar för standard | 1 fjärde sjundedelen                    |                  |      |
|                              | 2 första sjundedelen                    |                  |      |
|                              | 3 andra sjundedelen                     |                  |      |
|                              | 4 tredje sjundedelen                    |                  |      |
|                              | 5 femte sjundedelen                     |                  |      |
|                              | 6 sjätte sjundedelen                    |                  |      |
|                              | 7 sjunde sjundedelen                    |                  |      |
| season säsong/period         | 1 januari-mars                          |                  |      |
|                              | 2 april-maj                             |                  |      |
|                              | 3 juni-augusti                          |                  |      |
|                              | 4 september-oktober                     |                  |      |
|                              | 5 november-december                     |                  |      |
| holiday större helg          | 1 ingen större helg                     |                  |      |
|                              | 2 större helg (påsk/midsommar/julonyår) |                  |      |

## Categorical Variables Codings

|                              |                                         | Parameter coding |      |
|------------------------------|-----------------------------------------|------------------|------|
|                              |                                         | (14)             | (15) |
|                              | 502300005                               | ,000             | ,000 |
|                              | 502300006                               | ,000             | ,000 |
|                              | 502300007                               | ,000             | ,000 |
|                              | 502300214                               | ,000             | ,000 |
|                              | 502300411                               | ,000             | ,000 |
|                              | 502300415                               | ,000             | ,000 |
|                              | 502300416                               | ,000             | ,000 |
|                              | 502300811                               | ,000             | ,000 |
|                              | 502300913                               | ,000             | ,000 |
| weekday veckodag             | 1 måndag                                |                  |      |
|                              | 2 tisdag                                |                  |      |
|                              | 3 onsdag                                |                  |      |
|                              | 4 torsdag                               |                  |      |
|                              | 5 fredag                                |                  |      |
|                              | 6 lördag                                |                  |      |
|                              | 7 söndag                                |                  |      |
| sv7 sjättedelar för standard | 1 fjärde sjundedelen                    |                  |      |
|                              | 2 första sjundedelen                    |                  |      |
|                              | 3 andra sjundedelen                     |                  |      |
|                              | 4 tredje sjundedelen                    |                  |      |
|                              | 5 femte sjundedelen                     |                  |      |
|                              | 6 sjätte sjundedelen                    |                  |      |
|                              | 7 sjunde sjundedelen                    |                  |      |
| season säsong/period         | 1 januari-mars                          |                  |      |
|                              | 2 april-maj                             |                  |      |
|                              | 3 juni-augusti                          |                  |      |
|                              | 4 september-oktober                     |                  |      |
|                              | 5 november-december                     |                  |      |
| holiday större helg          | 1 ingen större helg                     |                  |      |
|                              | 2 större helg (påsk/midsommar/julonyår) |                  |      |

## Categorical Variables Codings

|                              |                                         | Parameter coding |      |
|------------------------------|-----------------------------------------|------------------|------|
|                              |                                         | (16)             | (17) |
|                              | 502300005                               | ,000             | ,000 |
|                              | 502300006                               | ,000             | ,000 |
|                              | 502300007                               | ,000             | ,000 |
|                              | 502300214                               | ,000             | ,000 |
|                              | 502300411                               | ,000             | ,000 |
|                              | 502300415                               | ,000             | ,000 |
|                              | 502300416                               | ,000             | ,000 |
|                              | 502300811                               | ,000             | ,000 |
|                              | 502300913                               | ,000             | ,000 |
| weekday veckodag             | 1 måndag                                |                  |      |
|                              | 2 tisdag                                |                  |      |
|                              | 3 onsdag                                |                  |      |
|                              | 4 torsdag                               |                  |      |
|                              | 5 fredag                                |                  |      |
|                              | 6 lördag                                |                  |      |
|                              | 7 söndag                                |                  |      |
| sv7 sjättedelar för standard | 1 fjärde sjundedelen                    |                  |      |
|                              | 2 första sjundedelen                    |                  |      |
|                              | 3 andra sjundedelen                     |                  |      |
|                              | 4 tredje sjundedelen                    |                  |      |
|                              | 5 femte sjundedelen                     |                  |      |
|                              | 6 sjätte sjundedelen                    |                  |      |
|                              | 7 sjunde sjundedelen                    |                  |      |
| season säsong/period         | 1 januari-mars                          |                  |      |
|                              | 2 april-maj                             |                  |      |
|                              | 3 juni-augusti                          |                  |      |
|                              | 4 september-oktober                     |                  |      |
|                              | 5 november-december                     |                  |      |
| holiday större helg          | 1 ingen större helg                     |                  |      |
|                              | 2 större helg (påsk/midsommar/julonyår) |                  |      |

## Categorical Variables Codings

|                              |                                         | Parameter coding |      |
|------------------------------|-----------------------------------------|------------------|------|
|                              |                                         | (18)             | (19) |
|                              | 502300005                               | ,000             | ,000 |
|                              | 502300006                               | ,000             | ,000 |
|                              | 502300007                               | ,000             | ,000 |
|                              | 502300214                               | ,000             | ,000 |
|                              | 502300411                               | ,000             | ,000 |
|                              | 502300415                               | ,000             | ,000 |
|                              | 502300416                               | ,000             | ,000 |
|                              | 502300811                               | ,000             | ,000 |
|                              | 502300913                               | ,000             | ,000 |
| weekday veckodag             | 1 måndag                                |                  |      |
|                              | 2 tisdag                                |                  |      |
|                              | 3 onsdag                                |                  |      |
|                              | 4 torsdag                               |                  |      |
|                              | 5 fredag                                |                  |      |
|                              | 6 lördag                                |                  |      |
|                              | 7 söndag                                |                  |      |
| sv7 sjättedelar för standard | 1 fjärde sjundedelen                    |                  |      |
|                              | 2 första sjundedelen                    |                  |      |
|                              | 3 andra sjundedelen                     |                  |      |
|                              | 4 tredje sjundedelen                    |                  |      |
|                              | 5 femte sjundedelen                     |                  |      |
|                              | 6 sjätte sjundedelen                    |                  |      |
|                              | 7 sjunde sjundedelen                    |                  |      |
| season säsong/period         | 1 januari-mars                          |                  |      |
|                              | 2 april-maj                             |                  |      |
|                              | 3 juni-augusti                          |                  |      |
|                              | 4 september-oktober                     |                  |      |
|                              | 5 november-december                     |                  |      |
| holiday större helg          | 1 ingen större helg                     |                  |      |
|                              | 2 större helg (påsk/midsommar/julonyår) |                  |      |

## Categorical Variables Codings

|                              |                                         | Parameter coding |      |
|------------------------------|-----------------------------------------|------------------|------|
|                              |                                         | (20)             | (21) |
|                              | 502300005                               | ,000             | ,000 |
|                              | 502300006                               | ,000             | ,000 |
|                              | 502300007                               | ,000             | ,000 |
|                              | 502300214                               | ,000             | ,000 |
|                              | 502300411                               | ,000             | ,000 |
|                              | 502300415                               | ,000             | ,000 |
|                              | 502300416                               | ,000             | ,000 |
|                              | 502300811                               | ,000             | ,000 |
|                              | 502300913                               | ,000             | ,000 |
| weekday veckodag             | 1 måndag                                |                  |      |
|                              | 2 tisdag                                |                  |      |
|                              | 3 onsdag                                |                  |      |
|                              | 4 torsdag                               |                  |      |
|                              | 5 fredag                                |                  |      |
|                              | 6 lördag                                |                  |      |
|                              | 7 söndag                                |                  |      |
| sv7 sjättedelar för standard | 1 fjärde sjundedelen                    |                  |      |
|                              | 2 första sjundedelen                    |                  |      |
|                              | 3 andra sjundedelen                     |                  |      |
|                              | 4 tredje sjundedelen                    |                  |      |
|                              | 5 femte sjundedelen                     |                  |      |
|                              | 6 sjätte sjundedelen                    |                  |      |
|                              | 7 sjunde sjundedelen                    |                  |      |
| season säsong/period         | 1 januari-mars                          |                  |      |
|                              | 2 april-maj                             |                  |      |
|                              | 3 juni-augusti                          |                  |      |
|                              | 4 september-oktober                     |                  |      |
|                              | 5 november-december                     |                  |      |
| holiday större helg          | 1 ingen större helg                     |                  |      |
|                              | 2 större helg (påsk/midsommar/julonyår) |                  |      |

## Categorical Variables Codings

|                              |                                         | Parameter coding |      |
|------------------------------|-----------------------------------------|------------------|------|
|                              |                                         | (22)             | (23) |
|                              | 502300005                               | ,000             | ,000 |
|                              | 502300006                               | ,000             | ,000 |
|                              | 502300007                               | ,000             | ,000 |
|                              | 502300214                               | ,000             | ,000 |
|                              | 502300411                               | ,000             | ,000 |
|                              | 502300415                               | ,000             | ,000 |
|                              | 502300416                               | ,000             | ,000 |
|                              | 502300811                               | ,000             | ,000 |
|                              | 502300913                               | ,000             | ,000 |
| weekday veckodag             | 1 måndag                                |                  |      |
|                              | 2 tisdag                                |                  |      |
|                              | 3 onsdag                                |                  |      |
|                              | 4 torsdag                               |                  |      |
|                              | 5 fredag                                |                  |      |
|                              | 6 lördag                                |                  |      |
|                              | 7 söndag                                |                  |      |
| sv7 sjättedelar för standard | 1 fjärde sjundedelen                    |                  |      |
|                              | 2 första sjundedelen                    |                  |      |
|                              | 3 andra sjundedelen                     |                  |      |
|                              | 4 tredje sjundedelen                    |                  |      |
|                              | 5 femte sjundedelen                     |                  |      |
|                              | 6 sjätte sjundedelen                    |                  |      |
|                              | 7 sjunde sjundedelen                    |                  |      |
| season säsong/period         | 1 januari-mars                          |                  |      |
|                              | 2 april-maj                             |                  |      |
|                              | 3 juni-augusti                          |                  |      |
|                              | 4 september-oktober                     |                  |      |
|                              | 5 november-december                     |                  |      |
| holiday större helg          | 1 ingen större helg                     |                  |      |
|                              | 2 större helg (påsk/midsommar/julonyår) |                  |      |

## Categorical Variables Codings

|                              |                                         | Parameter coding |      |
|------------------------------|-----------------------------------------|------------------|------|
|                              |                                         | (24)             | (25) |
|                              | 502300005                               | ,000             | ,000 |
|                              | 502300006                               | ,000             | ,000 |
|                              | 502300007                               | ,000             | ,000 |
|                              | 502300214                               | ,000             | ,000 |
|                              | 502300411                               | ,000             | ,000 |
|                              | 502300415                               | ,000             | ,000 |
|                              | 502300416                               | ,000             | ,000 |
|                              | 502300811                               | ,000             | ,000 |
|                              | 502300913                               | ,000             | ,000 |
| weekday veckodag             | 1 måndag                                |                  |      |
|                              | 2 tisdag                                |                  |      |
|                              | 3 onsdag                                |                  |      |
|                              | 4 torsdag                               |                  |      |
|                              | 5 fredag                                |                  |      |
|                              | 6 lördag                                |                  |      |
|                              | 7 söndag                                |                  |      |
| sv7 sjättedelar för standard | 1 fjärde sjundedelen                    |                  |      |
|                              | 2 första sjundedelen                    |                  |      |
|                              | 3 andra sjundedelen                     |                  |      |
|                              | 4 tredje sjundedelen                    |                  |      |
|                              | 5 femte sjundedelen                     |                  |      |
|                              | 6 sjätte sjundedelen                    |                  |      |
|                              | 7 sjunde sjundedelen                    |                  |      |
| season säsong/period         | 1 januari-mars                          |                  |      |
|                              | 2 april-maj                             |                  |      |
|                              | 3 juni-augusti                          |                  |      |
|                              | 4 september-oktober                     |                  |      |
|                              | 5 november-december                     |                  |      |
| holiday större helg          | 1 ingen större helg                     |                  |      |
|                              | 2 större helg (påsk/midsommar/julonyår) |                  |      |



## Categorical Variables Codings

|                              |                                         | Parameter coding |       |
|------------------------------|-----------------------------------------|------------------|-------|
|                              |                                         | (26)             | (27)  |
|                              | 502300005                               | ,000             | 1,000 |
|                              | 502300006                               | ,000             | ,000  |
|                              | 502300007                               | ,000             | ,000  |
|                              | 502300214                               | ,000             | ,000  |
|                              | 502300411                               | ,000             | ,000  |
|                              | 502300415                               | ,000             | ,000  |
|                              | 502300416                               | ,000             | ,000  |
|                              | 502300811                               | ,000             | ,000  |
|                              | 502300913                               | ,000             | ,000  |
| weekday veckodag             | 1 måndag                                |                  |       |
|                              | 2 tisdag                                |                  |       |
|                              | 3 onsdag                                |                  |       |
|                              | 4 torsdag                               |                  |       |
|                              | 5 fredag                                |                  |       |
|                              | 6 lördag                                |                  |       |
|                              | 7 söndag                                |                  |       |
| sv7 sjättedelar för standard | 1 fjärde sjundedelen                    |                  |       |
|                              | 2 första sjundedelen                    |                  |       |
|                              | 3 andra sjundedelen                     |                  |       |
|                              | 4 tredje sjundedelen                    |                  |       |
|                              | 5 femte sjundedelen                     |                  |       |
|                              | 6 sjätte sjundedelen                    |                  |       |
|                              | 7 sjunde sjundedelen                    |                  |       |
| season säsong/period         | 1 januari-mars                          |                  |       |
|                              | 2 april-maj                             |                  |       |
|                              | 3 juni-augusti                          |                  |       |
|                              | 4 september-oktober                     |                  |       |
|                              | 5 november-december                     |                  |       |
| holiday större helg          | 1 ingen större helg                     |                  |       |
|                              | 2 större helg (påsk/midsommar/julonyår) |                  |       |

## Categorical Variables Codings

|                              |                                         | Parameter coding |       |
|------------------------------|-----------------------------------------|------------------|-------|
|                              |                                         | (28)             | (29)  |
|                              | 502300005                               | ,000             | ,000  |
|                              | 502300006                               | 1,000            | ,000  |
|                              | 502300007                               | ,000             | 1,000 |
|                              | 502300214                               | ,000             | ,000  |
|                              | 502300411                               | ,000             | ,000  |
|                              | 502300415                               | ,000             | ,000  |
|                              | 502300416                               | ,000             | ,000  |
|                              | 502300811                               | ,000             | ,000  |
|                              | 502300913                               | ,000             | ,000  |
| weekday veckodag             | 1 måndag                                |                  |       |
|                              | 2 tisdag                                |                  |       |
|                              | 3 onsdag                                |                  |       |
|                              | 4 torsdag                               |                  |       |
|                              | 5 fredag                                |                  |       |
|                              | 6 lördag                                |                  |       |
|                              | 7 söndag                                |                  |       |
| sv7 sjättedelar för standard | 1 fjärde sjundedelen                    |                  |       |
|                              | 2 första sjundedelen                    |                  |       |
|                              | 3 andra sjundedelen                     |                  |       |
|                              | 4 tredje sjundedelen                    |                  |       |
|                              | 5 femte sjundedelen                     |                  |       |
|                              | 6 sjätte sjundedelen                    |                  |       |
|                              | 7 sjunde sjundedelen                    |                  |       |
| season säsong/period         | 1 januari-mars                          |                  |       |
|                              | 2 april-maj                             |                  |       |
|                              | 3 juni-augusti                          |                  |       |
|                              | 4 september-oktober                     |                  |       |
|                              | 5 november-december                     |                  |       |
| holiday större helg          | 1 ingen större helg                     |                  |       |
|                              | 2 större helg (påsk/midsommar/julonyår) |                  |       |

## Categorical Variables Codings

|                              |                                         | Parameter coding |       |
|------------------------------|-----------------------------------------|------------------|-------|
|                              |                                         | (30)             | (31)  |
|                              | 502300005                               | ,000             | ,000  |
|                              | 502300006                               | ,000             | ,000  |
|                              | 502300007                               | ,000             | ,000  |
|                              | 502300214                               | 1,000            | ,000  |
|                              | 502300411                               | ,000             | 1,000 |
|                              | 502300415                               | ,000             | ,000  |
|                              | 502300416                               | ,000             | ,000  |
|                              | 502300811                               | ,000             | ,000  |
|                              | 502300913                               | ,000             | ,000  |
| weekday veckodag             | 1 måndag                                |                  |       |
|                              | 2 tisdag                                |                  |       |
|                              | 3 onsdag                                |                  |       |
|                              | 4 torsdag                               |                  |       |
|                              | 5 fredag                                |                  |       |
|                              | 6 lördag                                |                  |       |
|                              | 7 söndag                                |                  |       |
| sv7 sjättedelar för standard | 1 fjärde sjundedelen                    |                  |       |
|                              | 2 första sjundedelen                    |                  |       |
|                              | 3 andra sjundedelen                     |                  |       |
|                              | 4 tredje sjundedelen                    |                  |       |
|                              | 5 femte sjundedelen                     |                  |       |
|                              | 6 sjätte sjundedelen                    |                  |       |
|                              | 7 sjunde sjundedelen                    |                  |       |
| season säsong/period         | 1 januari-mars                          |                  |       |
|                              | 2 april-maj                             |                  |       |
|                              | 3 juni-augusti                          |                  |       |
|                              | 4 september-oktober                     |                  |       |
|                              | 5 november-december                     |                  |       |
| holiday större helg          | 1 ingen större helg                     |                  |       |
|                              | 2 större helg (påsk/midsommar/julonyår) |                  |       |

## Categorical Variables Codings

|                              |                                         | Parameter coding |       |
|------------------------------|-----------------------------------------|------------------|-------|
|                              |                                         | (32)             | (33)  |
|                              | 502300005                               | ,000             | ,000  |
|                              | 502300006                               | ,000             | ,000  |
|                              | 502300007                               | ,000             | ,000  |
|                              | 502300214                               | ,000             | ,000  |
|                              | 502300411                               | ,000             | ,000  |
|                              | 502300415                               | 1,000            | ,000  |
|                              | 502300416                               | ,000             | 1,000 |
|                              | 502300811                               | ,000             | ,000  |
|                              | 502300913                               | ,000             | ,000  |
| weekday veckodag             | 1 måndag                                |                  |       |
|                              | 2 tisdag                                |                  |       |
|                              | 3 onsdag                                |                  |       |
|                              | 4 torsdag                               |                  |       |
|                              | 5 fredag                                |                  |       |
|                              | 6 lördag                                |                  |       |
|                              | 7 söndag                                |                  |       |
| sv7 sjättedelar för standard | 1 fjärde sjundedelen                    |                  |       |
|                              | 2 första sjundedelen                    |                  |       |
|                              | 3 andra sjundedelen                     |                  |       |
|                              | 4 tredje sjundedelen                    |                  |       |
|                              | 5 femte sjundedelen                     |                  |       |
|                              | 6 sjätte sjundedelen                    |                  |       |
|                              | 7 sjunde sjundedelen                    |                  |       |
| season säsong/period         | 1 januari-mars                          |                  |       |
|                              | 2 april-maj                             |                  |       |
|                              | 3 juni-augusti                          |                  |       |
|                              | 4 september-oktober                     |                  |       |
|                              | 5 november-december                     |                  |       |
| holiday större helg          | 1 ingen större helg                     |                  |       |
|                              | 2 större helg (påsk/midsommar/julonyår) |                  |       |

## Categorical Variables Codings

|                              |                                         | Parameter coding |       |
|------------------------------|-----------------------------------------|------------------|-------|
|                              |                                         | (34)             | (35)  |
|                              | 502300005                               | ,000             | ,000  |
|                              | 502300006                               | ,000             | ,000  |
|                              | 502300007                               | ,000             | ,000  |
|                              | 502300214                               | ,000             | ,000  |
|                              | 502300411                               | ,000             | ,000  |
|                              | 502300415                               | ,000             | ,000  |
|                              | 502300416                               | ,000             | ,000  |
|                              | 502300811                               | 1,000            | ,000  |
|                              | 502300913                               | ,000             | 1,000 |
| weekday veckodag             | 1 måndag                                |                  |       |
|                              | 2 tisdag                                |                  |       |
|                              | 3 onsdag                                |                  |       |
|                              | 4 torsdag                               |                  |       |
|                              | 5 fredag                                |                  |       |
|                              | 6 lördag                                |                  |       |
|                              | 7 söndag                                |                  |       |
| sv7 sjättedelar för standard | 1 fjärde sjundedelen                    |                  |       |
|                              | 2 första sjundedelen                    |                  |       |
|                              | 3 andra sjundedelen                     |                  |       |
|                              | 4 tredje sjundedelen                    |                  |       |
|                              | 5 femte sjundedelen                     |                  |       |
|                              | 6 sjätte sjundedelen                    |                  |       |
|                              | 7 sjunde sjundedelen                    |                  |       |
| season säsong/period         | 1 januari-mars                          |                  |       |
|                              | 2 april-maj                             |                  |       |
|                              | 3 juni-augusti                          |                  |       |
|                              | 4 september-oktober                     |                  |       |
|                              | 5 november-december                     |                  |       |
| holiday större helg          | 1 ingen större helg                     |                  |       |
|                              | 2 större helg (påsk/midsommar/julonyår) |                  |       |

**Block 0: Beginning Block**

Classification Table<sup>a,b</sup>

| Observed           |                              |                     | Predicted        |                     |
|--------------------|------------------------------|---------------------|------------------|---------------------|
|                    |                              |                     | 0 ingen hændelse | 1 minst en hændelse |
| Step 0             | hand01 hændelse nej eller ja | 0 ingen hændelse    | 11108            | 0                   |
|                    |                              | 1 minst en hændelse | 1367             | 0                   |
| Overall Percentage |                              |                     |                  |                     |

Classification Table<sup>a,b</sup>

| Observed           |                              |                     | Predicted          |
|--------------------|------------------------------|---------------------|--------------------|
|                    |                              |                     | Percentage Correct |
| Step 0             | hand01 hændelse nej eller ja | 0 ingen hændelse    | 100,0              |
|                    |                              | 1 minst en hændelse | ,0                 |
| Overall Percentage |                              |                     | 89,0               |

a. Constant is included in the model.

b. The cut value is ,500

Variables in the Equation

|                 | B      | S.E. | Wald     | df | Sig. | Exp(B) |
|-----------------|--------|------|----------|----|------|--------|
| Step 0 Constant | -2,095 | ,029 | 5342,584 | 1  | ,000 | ,123   |

## Variables not in the Equation

|        |           |            | Score   | df | Sig. |
|--------|-----------|------------|---------|----|------|
| Step 0 | Variables | sv7        | 43,959  | 6  | ,000 |
|        |           | sv7(1)     | 36,287  | 1  | ,000 |
|        |           | sv7(2)     | ,199    | 1  | ,655 |
|        |           | sv7(3)     | ,113    | 1  | ,737 |
|        |           | sv7(4)     | ,601    | 1  | ,438 |
|        |           | sv7(5)     | 10,247  | 1  | ,001 |
|        |           | sv7(6)     | 5,949   | 1  | ,015 |
|        |           | VASTY2     | 541,214 | 35 | ,000 |
|        |           | VASTY2(1)  | 1,169   | 1  | ,280 |
|        |           | VASTY2(2)  | 87,511  | 1  | ,000 |
|        |           | VASTY2(3)  | 13,995  | 1  | ,000 |
|        |           | VASTY2(4)  | ,464    | 1  | ,496 |
|        |           | VASTY2(5)  | 5,526   | 1  | ,019 |
|        |           | VASTY2(6)  | 19,435  | 1  | ,000 |
|        |           | VASTY2(7)  | 86,074  | 1  | ,000 |
|        |           | VASTY2(8)  | 1,043   | 1  | ,307 |
|        |           | VASTY2(9)  | ,408    | 1  | ,523 |
|        |           | VASTY2(10) | 58,583  | 1  | ,000 |
|        |           | VASTY2(11) | 33,445  | 1  | ,000 |
|        |           | VASTY2(12) | ,029    | 1  | ,865 |
|        |           | VASTY2(13) | 33,445  | 1  | ,000 |
|        |           | VASTY2(14) | 4,163   | 1  | ,041 |
|        |           | VASTY2(15) | ,464    | 1  | ,496 |
|        |           | VASTY2(16) | ,763    | 1  | ,382 |
|        |           | VASTY2(17) | 24,320  | 1  | ,000 |
|        |           | VASTY2(18) | 17,742  | 1  | ,000 |
|        |           | VASTY2(19) | 27,791  | 1  | ,000 |
|        |           | VASTY2(20) | ,015    | 1  | ,902 |
|        |           | VASTY2(21) | 2,890   | 1  | ,089 |
|        |           | VASTY2(22) | ,462    | 1  | ,497 |
|        |           | VASTY2(23) | 15,306  | 1  | ,000 |
|        |           | VASTY2(24) | 12,594  | 1  | ,000 |
|        |           | VASTY2(25) | ,128    | 1  | ,720 |
|        |           | VASTY2(26) | 12,864  | 1  | ,000 |
|        |           | VASTY2(27) | 24,439  | 1  | ,000 |
|        |           | VASTY2(28) | 9,963   | 1  | ,002 |
|        |           | VASTY2(29) | 18,184  | 1  | ,000 |
|        |           | VASTY2(30) | ,486    | 1  | ,486 |
|        |           | VASTY2(31) | 6,400   | 1  | ,011 |
|        |           | VASTY2(32) | 1,626   | 1  | ,202 |
|        |           | VASTY2(33) | 1,336   | 1  | ,248 |
|        |           | VASTY2(34) | 29,489  | 1  | ,000 |
|        |           | VASTY2(35) | 3,668   | 1  | ,055 |

## Variables not in the Equation

|                    | Score   | df | Sig. |
|--------------------|---------|----|------|
| weekday            | 20,834  | 6  | ,002 |
| weekday(1)         | ,196    | 1  | ,658 |
| weekday(2)         | ,004    | 1  | ,951 |
| weekday(3)         | 1,386   | 1  | ,239 |
| weekday(4)         | ,820    | 1  | ,365 |
| weekday(5)         | 20,097  | 1  | ,000 |
| weekday(6)         | 1,022   | 1  | ,312 |
| holiday(1)         | 4,862   | 1  | ,027 |
| season             | 15,673  | 4  | ,003 |
| season(1)          | ,214    | 1  | ,643 |
| season(2)          | 8,095   | 1  | ,004 |
| season(3)          | 10,213  | 1  | ,001 |
| season(4)          | ,313    | 1  | ,576 |
| Overall Statistics | 605,614 | 52 | ,000 |

## Block 1: Method = Enter

## Omnibus Tests of Model Coefficients

|             | Chi-square | df | Sig. |
|-------------|------------|----|------|
| Step 1 Step | 604,438    | 52 | ,000 |
| Block       | 604,438    | 52 | ,000 |
| Model       | 604,438    | 52 | ,000 |

## Model Summary

| Step | -2 Log likelihood     | Cox & Snell R Square | Nagelkerke R Square |
|------|-----------------------|----------------------|---------------------|
| 1    | 8019,145 <sup>a</sup> | ,047                 | ,095                |

a. Estimation terminated at iteration number 6 because parameter estimates changed by less than ,001.

Classification Table<sup>a</sup>

|                    |                              | Predicted        |                     |
|--------------------|------------------------------|------------------|---------------------|
|                    |                              | 0 ingen hændelse | 1 minst en hændelse |
| Observed           | hand01 hændelse nej eller ja | 11108            | 0                   |
|                    |                              | 1367             | 0                   |
| Overall Percentage |                              |                  |                     |



Classification Table<sup>a</sup>

| Observed           |                              |                     | Predicted |                    |
|--------------------|------------------------------|---------------------|-----------|--------------------|
|                    |                              |                     |           | Percentage Correct |
| Step 1             | hand01 händelse nej eller ja | 0 ingen händelse    | 100,0     |                    |
|                    |                              | 1 minst en händelse | ,0        |                    |
| Overall Percentage |                              |                     | 89,0      |                    |

a. The cut value is ,500

Variables in the Equation

|                         | B      | S.E. | Wald    | df | Sig. | Exp(B) |
|-------------------------|--------|------|---------|----|------|--------|
| Step 1 <sup>a</sup> sv7 |        |      | 17,254  | 6  | ,008 |        |
| sv7(1)                  | -,258  | ,126 | 4,229   | 1  | ,040 | ,772   |
| sv7(2)                  | -,052  | ,127 | ,169    | 1  | ,681 | ,949   |
| sv7(3)                  | -,109  | ,126 | ,754    | 1  | ,385 | ,897   |
| sv7(4)                  | -,064  | ,119 | ,293    | 1  | ,588 | ,938   |
| sv7(5)                  | ,022   | ,113 | ,037    | 1  | ,847 | 1,022  |
| sv7(6)                  | ,294   | ,127 | 5,396   | 1  | ,020 | 1,342  |
| VASTY2                  |        |      | 437,602 | 35 | ,000 |        |
| VASTY2(1)               | ,303   | ,241 | 1,579   | 1  | ,209 | 1,354  |
| VASTY2(2)               | 1,071  | ,223 | 23,151  | 1  | ,000 | 2,918  |
| VASTY2(3)               | -,676  | ,302 | 4,999   | 1  | ,025 | ,509   |
| VASTY2(4)               | ,296   | ,242 | 1,491   | 1  | ,222 | 1,345  |
| VASTY2(5)               | -,271  | ,284 | ,916    | 1  | ,338 | ,762   |
| VASTY2(6)               | -1,227 | ,337 | 13,247  | 1  | ,000 | ,293   |
| VASTY2(7)               | 1,255  | ,217 | 33,369  | 1  | ,000 | 3,507  |
| VASTY2(8)               | ,366   | ,241 | 2,307   | 1  | ,129 | 1,442  |
| VASTY2(9)               | ,274   | ,246 | 1,241   | 1  | ,265 | 1,315  |
| VASTY2(10)              | ,888   | ,227 | 15,274  | 1  | ,000 | 2,431  |
| VASTY2(11)              | ,915   | ,223 | 16,802  | 1  | ,000 | 2,497  |
| VASTY2(12)              | ,026   | ,251 | ,011    | 1  | ,917 | 1,026  |
| VASTY2(13)              | ,692   | ,232 | 8,896   | 1  | ,003 | 1,999  |
| VASTY2(14)              | -,322  | ,270 | 1,427   | 1  | ,232 | ,725   |
| VASTY2(15)              | ,121   | ,248 | ,239    | 1  | ,625 | 1,129  |
| VASTY2(16)              | ,205   | ,291 | ,496    | 1  | ,481 | 1,227  |
| VASTY2(17)              | -1,185 | ,356 | 11,067  | 1  | ,001 | ,306   |
| VASTY2(18)              | -,680  | ,331 | 4,213   | 1  | ,040 | ,507   |
| VASTY2(19)              | -1,205 | ,394 | 9,363   | 1  | ,002 | ,300   |
| VASTY2(20)              | -,029  | ,264 | ,012    | 1  | ,911 | ,971   |
| VASTY2(21)              | -,115  | ,263 | ,190    | 1  | ,663 | ,892   |
| VASTY2(22)              | ,057   | ,252 | ,051    | 1  | ,821 | 1,059  |
| VASTY2(23)              | ,709   | ,228 | 9,646   | 1  | ,002 | 2,031  |

## Variables in the Equation

|                     |            | 95% C.I. for EXP(B) |       |
|---------------------|------------|---------------------|-------|
|                     |            | Lower               | Upper |
| Step 1 <sup>a</sup> | sv7        |                     |       |
|                     | sv7(1)     | ,604                | ,988  |
|                     | sv7(2)     | ,740                | 1,218 |
|                     | sv7(3)     | ,701                | 1,147 |
|                     | sv7(4)     | ,743                | 1,184 |
|                     | sv7(5)     | ,819                | 1,275 |
|                     | sv7(6)     | 1,047               | 1,720 |
|                     | VASTY2     |                     |       |
|                     | VASTY2(1)  | ,844                | 2,173 |
|                     | VASTY2(2)  | 1,886               | 4,513 |
|                     | VASTY2(3)  | ,281                | ,920  |
|                     | VASTY2(4)  | ,836                | 2,163 |
|                     | VASTY2(5)  | ,437                | 1,329 |
|                     | VASTY2(6)  | ,152                | ,568  |
|                     | VASTY2(7)  | 2,291               | 5,368 |
|                     | VASTY2(8)  | ,899                | 2,314 |
|                     | VASTY2(9)  | ,812                | 2,130 |
|                     | VASTY2(10) | 1,557               | 3,795 |
|                     | VASTY2(11) | 1,612               | 3,868 |
|                     | VASTY2(12) | ,627                | 1,680 |
|                     | VASTY2(13) | 1,268               | 3,150 |
|                     | VASTY2(14) | ,427                | 1,229 |
|                     | VASTY2(15) | ,695                | 1,834 |
|                     | VASTY2(16) | ,694                | 2,170 |
|                     | VASTY2(17) | ,152                | ,614  |
|                     | VASTY2(18) | ,265                | ,970  |
|                     | VASTY2(19) | ,138                | ,648  |
|                     | VASTY2(20) | ,578                | 1,630 |
|                     | VASTY2(21) | ,532                | 1,493 |
|                     | VASTY2(22) | ,646                | 1,735 |
|                     | VASTY2(23) | 1,299               | 3,177 |

review only

## Variables in the Equation

|            | B      | S.E. | Wald   | df | Sig. | Exp(B) |
|------------|--------|------|--------|----|------|--------|
| VASTY2(24) | ,580   | ,230 | 6,365  | 1  | ,012 | 1,786  |
| VASTY2(25) | ,102   | ,266 | ,146   | 1  | ,702 | 1,107  |
| VASTY2(26) | -,853  | ,337 | 6,406  | 1  | ,011 | ,426   |
| VASTY2(27) | -1,369 | ,359 | 14,543 | 1  | ,000 | ,254   |
| VASTY2(28) | -1,183 | ,382 | 9,587  | 1  | ,002 | ,306   |
| VASTY2(29) | -1,242 | ,334 | 13,838 | 1  | ,000 | ,289   |
| VASTY2(30) | ,077   | ,253 | ,094   | 1  | ,760 | 1,081  |
| VASTY2(31) | ,664   | ,242 | 7,543  | 1  | ,006 | 1,942  |
| VASTY2(32) | ,111   | ,273 | ,167   | 1  | ,683 | 1,118  |
| VASTY2(33) | ,154   | ,273 | ,316   | 1  | ,574 | 1,166  |
| VASTY2(34) | -1,551 | ,401 | 14,976 | 1  | ,000 | ,212   |
| VASTY2(35) | ,431   | ,243 | 3,128  | 1  | ,077 | 1,538  |
| weekday    |        |      | 18,676 | 6  | ,005 |        |
| weekday(1) | -,024  | ,107 | ,052   | 1  | ,820 | ,976   |
| weekday(2) | -,053  | ,108 | ,237   | 1  | ,627 | ,949   |
| weekday(3) | ,027   | ,107 | ,064   | 1  | ,800 | 1,027  |
| weekday(4) | ,035   | ,107 | ,107   | 1  | ,744 | 1,036  |
| weekday(5) | -,399  | ,119 | 11,250 | 1  | ,001 | ,671   |
| weekday(6) | ,039   | ,108 | ,132   | 1  | ,717 | 1,040  |
| holiday(1) | -,474  | ,202 | 5,537  | 1  | ,019 | ,622   |
| season     |        |      | 13,156 | 4  | ,011 |        |
| season(1)  | -,076  | ,092 | ,678   | 1  | ,410 | ,927   |
| season(2)  | -,186  | ,088 | 4,484  | 1  | ,034 | ,830   |
| season(3)  | ,144   | ,088 | 2,677  | 1  | ,102 | 1,155  |
| season(4)  | -,030  | ,093 | ,100   | 1  | ,751 | ,971   |
| Constant   | -2,116 | ,213 | 98,831 | 1  | ,000 | ,121   |

## Variables in the Equation

|            | 95% C.I. for EXP(B) |       |
|------------|---------------------|-------|
|            | Lower               | Upper |
| VASTY2(24) | 1,138               | 2,804 |
| VASTY2(25) | ,658                | 1,863 |
| VASTY2(26) | ,220                | ,825  |
| VASTY2(27) | ,126                | ,514  |
| VASTY2(28) | ,145                | ,648  |
| VASTY2(29) | ,150                | ,556  |
| VASTY2(30) | ,658                | 1,775 |
| VASTY2(31) | 1,209               | 3,118 |
| VASTY2(32) | ,655                | 1,908 |
| VASTY2(33) | ,683                | 1,992 |
| VASTY2(34) | ,097                | ,465  |
| VASTY2(35) | ,954                | 2,479 |
| weekday    |                     |       |
| weekday(1) | ,791                | 1,205 |
| weekday(2) | ,767                | 1,173 |
| weekday(3) | ,833                | 1,267 |
| weekday(4) | ,839                | 1,279 |
| weekday(5) | ,531                | ,847  |
| weekday(6) | ,841                | 1,286 |
| holiday(1) | ,419                | ,924  |
| season     |                     |       |
| season(1)  | ,774                | 1,111 |
| season(2)  | ,698                | ,986  |
| season(3)  | ,972                | 1,372 |
| season(4)  | ,808                | 1,166 |
| Constant   |                     |       |

a. Variable(s) entered on step 1: sv7, VASTY2, weekday, holiday, season.

\*\*

```
LOGISTIC REGRESSION VARIABLES luonnelt1
/METHOD=ENTER bv1 VASTY2 weekday holiday season
/CONTRAST (bv1)=Indicator(1)
/CONTRAST (VASTY2)=Indicator(1)
/CONTRAST (weekday)=Indicator(1)
/CONTRAST (holiday)=Indicator(1)
/CONTRAST (season)=Indicator(1)
/PRINT=CI(95)
/CRITERIA=PIN(0.05) POUT(0.10) ITERATE(20) CUT(0.5).
```

## Logistic Regression

[DataSet6] C:\cWordjan\Rafaela\_VCS\alla\_tillsammans\abo\_bjo\_vasa\_v1.sav

### Case Processing Summary

| Unweighted Cases <sup>a</sup> |                      | N     | Percent |
|-------------------------------|----------------------|-------|---------|
| Selected Cases                | Included in Analysis | 12475 | 100,0   |
|                               | Missing Cases        | 0     | ,0      |
|                               | Total                | 12475 | 100,0   |
| Unselected Cases              |                      | 0     | ,0      |
| Total                         |                      | 12475 | 100,0   |

a. If weight is in effect, see classification table for the total number of cases.

### Dependent Variable Encoding

| Original Value                      | Internal Value |
|-------------------------------------|----------------|
| 0 ingen händelse eller läheltä piti | 0              |
| 1 tapahtui potilaalle               | 1              |

### Categorical Variables Codings

|                           | Frequency | Parameter |
|---------------------------|-----------|-----------|
|                           |           | (1)       |
| VASTY2 (SAIR*10000)+VASTY | 365       | ,000      |
| 403073101                 | 362       | 1,000     |
| 403073102                 | 365       | ,000      |
| 403073103                 | 365       | ,000      |
| 403073202                 | 330       | ,000      |
| 403073203                 | 364       | ,000      |
| 403073204                 | 362       | ,000      |
| 403073303                 | 365       | ,000      |
| 403073651                 | 365       | ,000      |
| 403073771                 | 341       | ,000      |
| 403133102                 | 365       | ,000      |
| 403133106                 | 365       | ,000      |
| 403133107                 | 365       | ,000      |
| 403133109                 | 365       | ,000      |
| 403133202                 | 365       | ,000      |
| 403133203                 | 365       | ,000      |
| 403133204                 | 365       | ,000      |
| 403133315                 | 177       | ,000      |
| 403133322                 | 365       | ,000      |
| 403133401                 | 362       | ,000      |
| 403133402                 | 365       | ,000      |
| 403133550                 | 298       | ,000      |
| 403133772                 | 365       | ,000      |
| 403135803                 | 365       | ,000      |
| 404060001                 | 365       | ,000      |
| 404060002                 | 366       | ,000      |

## Categorical Variables Codings

|                           |           | Parameter coding |       |
|---------------------------|-----------|------------------|-------|
|                           |           | (2)              | (3)   |
| VASTY2 (SAIR*10000)+VASTY | 403073101 | ,000             | ,000  |
|                           | 403073102 | ,000             | ,000  |
|                           | 403073103 | 1,000            | ,000  |
|                           | 403073202 | ,000             | 1,000 |
|                           | 403073203 | ,000             | ,000  |
|                           | 403073204 | ,000             | ,000  |
|                           | 403073303 | ,000             | ,000  |
|                           | 403073651 | ,000             | ,000  |
|                           | 403073771 | ,000             | ,000  |
|                           | 403133102 | ,000             | ,000  |
|                           | 403133106 | ,000             | ,000  |
|                           | 403133107 | ,000             | ,000  |
|                           | 403133109 | ,000             | ,000  |
|                           | 403133202 | ,000             | ,000  |
|                           | 403133203 | ,000             | ,000  |
|                           | 403133204 | ,000             | ,000  |
|                           | 403133315 | ,000             | ,000  |
|                           | 403133322 | ,000             | ,000  |
|                           | 403133401 | ,000             | ,000  |
|                           | 403133402 | ,000             | ,000  |
|                           | 403133550 | ,000             | ,000  |
|                           | 403133772 | ,000             | ,000  |
|                           | 403135803 | ,000             | ,000  |
|                           | 404060001 | ,000             | ,000  |
|                           | 404060002 | ,000             | ,000  |

Only

1  
2  
3  
4  
5  
6  
7  
8  
9  
10  
11  
12  
13  
14  
15  
16  
17  
18  
19  
20  
21  
22  
23  
24  
25  
26  
27  
28  
29  
30  
31  
32  
33  
34  
35  
36  
37  
38  
39  
40  
41  
42  
43  
44  
45  
46  
47  
48  
49  
50  
51  
52  
53  
54  
55  
56  
57  
58  
59  
60

**Categorical Variables Codings**

|                           |           | Parameter coding |       |
|---------------------------|-----------|------------------|-------|
|                           |           | (4)              | (5)   |
| VASTY2 (SAIR*10000)+VASTY | 403073101 | ,000             | ,000  |
|                           | 403073102 | ,000             | ,000  |
|                           | 403073103 | ,000             | ,000  |
|                           | 403073202 | ,000             | ,000  |
|                           | 403073203 | 1,000            | ,000  |
|                           | 403073204 | ,000             | 1,000 |
|                           | 403073303 | ,000             | ,000  |
|                           | 403073651 | ,000             | ,000  |
|                           | 403073771 | ,000             | ,000  |
|                           | 403133102 | ,000             | ,000  |
|                           | 403133106 | ,000             | ,000  |
|                           | 403133107 | ,000             | ,000  |
|                           | 403133109 | ,000             | ,000  |
|                           | 403133202 | ,000             | ,000  |
|                           | 403133203 | ,000             | ,000  |
|                           | 403133204 | ,000             | ,000  |
|                           | 403133315 | ,000             | ,000  |
|                           | 403133322 | ,000             | ,000  |
|                           | 403133401 | ,000             | ,000  |
|                           | 403133402 | ,000             | ,000  |
|                           | 403133550 | ,000             | ,000  |
|                           | 403133772 | ,000             | ,000  |
|                           | 403135803 | ,000             | ,000  |
|                           | 404060001 | ,000             | ,000  |
|                           | 404060002 | ,000             | ,000  |

Only

## Categorical Variables Codings

|                           |           | Parameter coding |       |
|---------------------------|-----------|------------------|-------|
|                           |           | (6)              | (7)   |
| VASTY2 (SAIR*10000)+VASTY | 403073101 | ,000             | ,000  |
|                           | 403073102 | ,000             | ,000  |
|                           | 403073103 | ,000             | ,000  |
|                           | 403073202 | ,000             | ,000  |
|                           | 403073203 | ,000             | ,000  |
|                           | 403073204 | ,000             | ,000  |
|                           | 403073303 | 1,000            | ,000  |
|                           | 403073651 | ,000             | 1,000 |
|                           | 403073771 | ,000             | ,000  |
|                           | 403133102 | ,000             | ,000  |
|                           | 403133106 | ,000             | ,000  |
|                           | 403133107 | ,000             | ,000  |
|                           | 403133109 | ,000             | ,000  |
|                           | 403133202 | ,000             | ,000  |
|                           | 403133203 | ,000             | ,000  |
|                           | 403133204 | ,000             | ,000  |
|                           | 403133315 | ,000             | ,000  |
|                           | 403133322 | ,000             | ,000  |
|                           | 403133401 | ,000             | ,000  |
|                           | 403133402 | ,000             | ,000  |
|                           | 403133550 | ,000             | ,000  |
|                           | 403133772 | ,000             | ,000  |
|                           | 403135803 | ,000             | ,000  |
|                           | 404060001 | ,000             | ,000  |
|                           | 404060002 | ,000             | ,000  |

Only



1  
2  
3  
4  
5  
6  
7  
8  
9  
10  
11  
12  
13  
14  
15  
16  
17  
18  
19  
20  
21  
22  
23  
24  
25  
26  
27  
28  
29  
30  
31  
32  
33  
34  
35  
36  
37  
38  
39  
40  
41  
42  
43  
44  
45  
46  
47  
48  
49  
50  
51  
52  
53  
54  
55  
56  
57  
58  
59  
60

**Categorical Variables Codings**

|                           |           | Parameter coding |       |
|---------------------------|-----------|------------------|-------|
|                           |           | (8)              | (9)   |
| VASTY2 (SAIR*10000)+VASTY | 403073101 | ,000             | ,000  |
|                           | 403073102 | ,000             | ,000  |
|                           | 403073103 | ,000             | ,000  |
|                           | 403073202 | ,000             | ,000  |
|                           | 403073203 | ,000             | ,000  |
|                           | 403073204 | ,000             | ,000  |
|                           | 403073303 | ,000             | ,000  |
|                           | 403073651 | ,000             | ,000  |
|                           | 403073771 | 1,000            | ,000  |
|                           | 403133102 | ,000             | 1,000 |
|                           | 403133106 | ,000             | ,000  |
|                           | 403133107 | ,000             | ,000  |
|                           | 403133109 | ,000             | ,000  |
|                           | 403133202 | ,000             | ,000  |
|                           | 403133203 | ,000             | ,000  |
|                           | 403133204 | ,000             | ,000  |
|                           | 403133315 | ,000             | ,000  |
|                           | 403133322 | ,000             | ,000  |
|                           | 403133401 | ,000             | ,000  |
|                           | 403133402 | ,000             | ,000  |
|                           | 403133550 | ,000             | ,000  |
|                           | 403133772 | ,000             | ,000  |
|                           | 403135803 | ,000             | ,000  |
|                           | 404060001 | ,000             | ,000  |
|                           | 404060002 | ,000             | ,000  |

Only

## Categorical Variables Codings

|                           |           | Parameter coding |       |
|---------------------------|-----------|------------------|-------|
|                           |           | (10)             | (11)  |
| VASTY2 (SAIR*10000)+VASTY | 403073101 | ,000             | ,000  |
|                           | 403073102 | ,000             | ,000  |
|                           | 403073103 | ,000             | ,000  |
|                           | 403073202 | ,000             | ,000  |
|                           | 403073203 | ,000             | ,000  |
|                           | 403073204 | ,000             | ,000  |
|                           | 403073303 | ,000             | ,000  |
|                           | 403073651 | ,000             | ,000  |
|                           | 403073771 | ,000             | ,000  |
|                           | 403133102 | ,000             | ,000  |
|                           | 403133106 | 1,000            | ,000  |
|                           | 403133107 | ,000             | 1,000 |
|                           | 403133109 | ,000             | ,000  |
|                           | 403133202 | ,000             | ,000  |
|                           | 403133203 | ,000             | ,000  |
|                           | 403133204 | ,000             | ,000  |
|                           | 403133315 | ,000             | ,000  |
|                           | 403133322 | ,000             | ,000  |
|                           | 403133401 | ,000             | ,000  |
|                           | 403133402 | ,000             | ,000  |
|                           | 403133550 | ,000             | ,000  |
|                           | 403133772 | ,000             | ,000  |
|                           | 403135803 | ,000             | ,000  |
|                           | 404060001 | ,000             | ,000  |
|                           | 404060002 | ,000             | ,000  |

Only

1  
2  
3  
4  
5  
6  
7  
8  
9  
10  
11  
12  
13  
14  
15  
16  
17  
18  
19  
20  
21  
22  
23  
24  
25  
26  
27  
28  
29  
30  
31  
32  
33  
34  
35  
36  
37  
38  
39  
40  
41  
42  
43  
44  
45  
46  
47  
48  
49  
50  
51  
52  
53  
54  
55  
56  
57  
58  
59  
60

**Categorical Variables Codings**

|                           |           | Parameter coding |       |
|---------------------------|-----------|------------------|-------|
|                           |           | (12)             | (13)  |
| VASTY2 (SAIR*10000)+VASTY | 403073101 | ,000             | ,000  |
|                           | 403073102 | ,000             | ,000  |
|                           | 403073103 | ,000             | ,000  |
|                           | 403073202 | ,000             | ,000  |
|                           | 403073203 | ,000             | ,000  |
|                           | 403073204 | ,000             | ,000  |
|                           | 403073303 | ,000             | ,000  |
|                           | 403073651 | ,000             | ,000  |
|                           | 403073771 | ,000             | ,000  |
|                           | 403133102 | ,000             | ,000  |
|                           | 403133106 | ,000             | ,000  |
|                           | 403133107 | ,000             | ,000  |
|                           | 403133109 | 1,000            | ,000  |
|                           | 403133202 | ,000             | 1,000 |
|                           | 403133203 | ,000             | ,000  |
|                           | 403133204 | ,000             | ,000  |
|                           | 403133315 | ,000             | ,000  |
|                           | 403133322 | ,000             | ,000  |
|                           | 403133401 | ,000             | ,000  |
|                           | 403133402 | ,000             | ,000  |
|                           | 403133550 | ,000             | ,000  |
|                           | 403133772 | ,000             | ,000  |
|                           | 403135803 | ,000             | ,000  |
|                           | 404060001 | ,000             | ,000  |
|                           | 404060002 | ,000             | ,000  |

only

## Categorical Variables Codings

|                           |           | Parameter coding |       |
|---------------------------|-----------|------------------|-------|
|                           |           | (14)             | (15)  |
| VASTY2 (SAIR*10000)+VASTY | 403073101 | ,000             | ,000  |
|                           | 403073102 | ,000             | ,000  |
|                           | 403073103 | ,000             | ,000  |
|                           | 403073202 | ,000             | ,000  |
|                           | 403073203 | ,000             | ,000  |
|                           | 403073204 | ,000             | ,000  |
|                           | 403073303 | ,000             | ,000  |
|                           | 403073651 | ,000             | ,000  |
|                           | 403073771 | ,000             | ,000  |
|                           | 403133102 | ,000             | ,000  |
|                           | 403133106 | ,000             | ,000  |
|                           | 403133107 | ,000             | ,000  |
|                           | 403133109 | ,000             | ,000  |
|                           | 403133202 | ,000             | ,000  |
|                           | 403133203 | 1,000            | ,000  |
|                           | 403133204 | ,000             | 1,000 |
|                           | 403133315 | ,000             | ,000  |
|                           | 403133322 | ,000             | ,000  |
|                           | 403133401 | ,000             | ,000  |
|                           | 403133402 | ,000             | ,000  |
|                           | 403133550 | ,000             | ,000  |
|                           | 403133772 | ,000             | ,000  |
|                           | 403135803 | ,000             | ,000  |
|                           | 404060001 | ,000             | ,000  |
|                           | 404060002 | ,000             | ,000  |

Only

**Categorical Variables Codings**

|                           |           | Parameter coding |       |
|---------------------------|-----------|------------------|-------|
|                           |           | (16)             | (17)  |
| VASTY2 (SAIR*10000)+VASTY | 403073101 | ,000             | ,000  |
|                           | 403073102 | ,000             | ,000  |
|                           | 403073103 | ,000             | ,000  |
|                           | 403073202 | ,000             | ,000  |
|                           | 403073203 | ,000             | ,000  |
|                           | 403073204 | ,000             | ,000  |
|                           | 403073303 | ,000             | ,000  |
|                           | 403073651 | ,000             | ,000  |
|                           | 403073771 | ,000             | ,000  |
|                           | 403133102 | ,000             | ,000  |
|                           | 403133106 | ,000             | ,000  |
|                           | 403133107 | ,000             | ,000  |
|                           | 403133109 | ,000             | ,000  |
|                           | 403133202 | ,000             | ,000  |
|                           | 403133203 | ,000             | ,000  |
|                           | 403133204 | ,000             | ,000  |
|                           | 403133315 | 1,000            | ,000  |
|                           | 403133322 | ,000             | 1,000 |
|                           | 403133401 | ,000             | ,000  |
|                           | 403133402 | ,000             | ,000  |
|                           | 403133550 | ,000             | ,000  |
|                           | 403133772 | ,000             | ,000  |
|                           | 403135803 | ,000             | ,000  |
|                           | 404060001 | ,000             | ,000  |
|                           | 404060002 | ,000             | ,000  |

Only

## Categorical Variables Codings

|                           |           | Parameter coding |       |
|---------------------------|-----------|------------------|-------|
|                           |           | (18)             | (19)  |
| VASTY2 (SAIR*10000)+VASTY | 403073101 | ,000             | ,000  |
|                           | 403073102 | ,000             | ,000  |
|                           | 403073103 | ,000             | ,000  |
|                           | 403073202 | ,000             | ,000  |
|                           | 403073203 | ,000             | ,000  |
|                           | 403073204 | ,000             | ,000  |
|                           | 403073303 | ,000             | ,000  |
|                           | 403073651 | ,000             | ,000  |
|                           | 403073771 | ,000             | ,000  |
|                           | 403133102 | ,000             | ,000  |
|                           | 403133106 | ,000             | ,000  |
|                           | 403133107 | ,000             | ,000  |
|                           | 403133109 | ,000             | ,000  |
|                           | 403133202 | ,000             | ,000  |
|                           | 403133203 | ,000             | ,000  |
|                           | 403133204 | ,000             | ,000  |
|                           | 403133315 | ,000             | ,000  |
|                           | 403133322 | ,000             | ,000  |
|                           | 403133401 | 1,000            | ,000  |
|                           | 403133402 | ,000             | 1,000 |
|                           | 403133550 | ,000             | ,000  |
|                           | 403133772 | ,000             | ,000  |
|                           | 403135803 | ,000             | ,000  |
|                           | 404060001 | ,000             | ,000  |
|                           | 404060002 | ,000             | ,000  |

Only

1  
2  
3  
4  
5  
6  
7  
8  
9  
10  
11  
12  
13  
14  
15  
16  
17  
18  
19  
20  
21  
22  
23  
24  
25  
26  
27  
28  
29  
30  
31  
32  
33  
34  
35  
36  
37  
38  
39  
40  
41  
42  
43  
44  
45  
46  
47  
48  
49  
50  
51  
52  
53  
54  
55  
56  
57  
58  
59  
60

**Categorical Variables Codings**

|                           |           | Parameter coding |       |
|---------------------------|-----------|------------------|-------|
|                           |           | (20)             | (21)  |
| VASTY2 (SAIR*10000)+VASTY | 403073101 | ,000             | ,000  |
|                           | 403073102 | ,000             | ,000  |
|                           | 403073103 | ,000             | ,000  |
|                           | 403073202 | ,000             | ,000  |
|                           | 403073203 | ,000             | ,000  |
|                           | 403073204 | ,000             | ,000  |
|                           | 403073303 | ,000             | ,000  |
|                           | 403073651 | ,000             | ,000  |
|                           | 403073771 | ,000             | ,000  |
|                           | 403133102 | ,000             | ,000  |
|                           | 403133106 | ,000             | ,000  |
|                           | 403133107 | ,000             | ,000  |
|                           | 403133109 | ,000             | ,000  |
|                           | 403133202 | ,000             | ,000  |
|                           | 403133203 | ,000             | ,000  |
|                           | 403133204 | ,000             | ,000  |
|                           | 403133315 | ,000             | ,000  |
|                           | 403133322 | ,000             | ,000  |
|                           | 403133401 | ,000             | ,000  |
|                           | 403133402 | ,000             | ,000  |
|                           | 403133550 | 1,000            | ,000  |
|                           | 403133772 | ,000             | 1,000 |
|                           | 403135803 | ,000             | ,000  |
|                           | 404060001 | ,000             | ,000  |
|                           | 404060002 | ,000             | ,000  |

only

## Categorical Variables Codings

|                           |           | Parameter coding |       |
|---------------------------|-----------|------------------|-------|
|                           |           | (22)             | (23)  |
| VASTY2 (SAIR*10000)+VASTY | 403073101 | ,000             | ,000  |
|                           | 403073102 | ,000             | ,000  |
|                           | 403073103 | ,000             | ,000  |
|                           | 403073202 | ,000             | ,000  |
|                           | 403073203 | ,000             | ,000  |
|                           | 403073204 | ,000             | ,000  |
|                           | 403073303 | ,000             | ,000  |
|                           | 403073651 | ,000             | ,000  |
|                           | 403073771 | ,000             | ,000  |
|                           | 403133102 | ,000             | ,000  |
|                           | 403133106 | ,000             | ,000  |
|                           | 403133107 | ,000             | ,000  |
|                           | 403133109 | ,000             | ,000  |
|                           | 403133202 | ,000             | ,000  |
|                           | 403133203 | ,000             | ,000  |
|                           | 403133204 | ,000             | ,000  |
|                           | 403133315 | ,000             | ,000  |
|                           | 403133322 | ,000             | ,000  |
|                           | 403133401 | ,000             | ,000  |
|                           | 403133402 | ,000             | ,000  |
|                           | 403133550 | ,000             | ,000  |
|                           | 403133772 | ,000             | ,000  |
|                           | 403135803 | 1,000            | ,000  |
|                           | 404060001 | ,000             | 1,000 |
|                           | 404060002 | ,000             | ,000  |

Only



1  
2  
3  
4  
5  
6  
7  
8  
9  
10  
11  
12  
13  
14  
15  
16  
17  
18  
19  
20  
21  
22  
23  
24  
25  
26  
27  
28  
29  
30  
31  
32  
33  
34  
35  
36  
37  
38  
39  
40  
41  
42  
43  
44  
45  
46  
47  
48  
49  
50  
51  
52  
53  
54  
55  
56  
57  
58  
59  
60

**Categorical Variables Codings**

|                           |           | Parameter coding |      |
|---------------------------|-----------|------------------|------|
|                           |           | (24)             | (25) |
| VASTY2 (SAIR*10000)+VASTY | 403073101 | ,000             | ,000 |
|                           | 403073102 | ,000             | ,000 |
|                           | 403073103 | ,000             | ,000 |
|                           | 403073202 | ,000             | ,000 |
|                           | 403073203 | ,000             | ,000 |
|                           | 403073204 | ,000             | ,000 |
|                           | 403073303 | ,000             | ,000 |
|                           | 403073651 | ,000             | ,000 |
|                           | 403073771 | ,000             | ,000 |
|                           | 403133102 | ,000             | ,000 |
|                           | 403133106 | ,000             | ,000 |
|                           | 403133107 | ,000             | ,000 |
|                           | 403133109 | ,000             | ,000 |
|                           | 403133202 | ,000             | ,000 |
|                           | 403133203 | ,000             | ,000 |
|                           | 403133204 | ,000             | ,000 |
|                           | 403133315 | ,000             | ,000 |
|                           | 403133322 | ,000             | ,000 |
|                           | 403133401 | ,000             | ,000 |
|                           | 403133402 | ,000             | ,000 |
|                           | 403133550 | ,000             | ,000 |
|                           | 403133772 | ,000             | ,000 |
|                           | 403135803 | ,000             | ,000 |
|                           | 404060001 | ,000             | ,000 |
|                           | 404060002 | 1,000            | ,000 |

Only

## Categorical Variables Codings

|                           |           | Parameter coding |      |
|---------------------------|-----------|------------------|------|
|                           |           | (26)             | (27) |
| VASTY2 (SAIR*10000)+VASTY | 403073101 | ,000             | ,000 |
|                           | 403073102 | ,000             | ,000 |
|                           | 403073103 | ,000             | ,000 |
|                           | 403073202 | ,000             | ,000 |
|                           | 403073203 | ,000             | ,000 |
|                           | 403073204 | ,000             | ,000 |
|                           | 403073303 | ,000             | ,000 |
|                           | 403073651 | ,000             | ,000 |
|                           | 403073771 | ,000             | ,000 |
|                           | 403133102 | ,000             | ,000 |
|                           | 403133106 | ,000             | ,000 |
|                           | 403133107 | ,000             | ,000 |
|                           | 403133109 | ,000             | ,000 |
|                           | 403133202 | ,000             | ,000 |
|                           | 403133203 | ,000             | ,000 |
|                           | 403133204 | ,000             | ,000 |
|                           | 403133315 | ,000             | ,000 |
|                           | 403133322 | ,000             | ,000 |
|                           | 403133401 | ,000             | ,000 |
|                           | 403133402 | ,000             | ,000 |
|                           | 403133550 | ,000             | ,000 |
|                           | 403133772 | ,000             | ,000 |
|                           | 403135803 | ,000             | ,000 |
|                           | 404060001 | ,000             | ,000 |
|                           | 404060002 | ,000             | ,000 |

Only

1  
2  
3  
4  
5  
6  
7  
8  
9  
10  
11  
12  
13  
14  
15  
16  
17  
18  
19  
20  
21  
22  
23  
24  
25  
26  
27  
28  
29  
30  
31  
32  
33  
34  
35  
36  
37  
38  
39  
40  
41  
42  
43  
44  
45  
46  
47  
48  
49  
50  
51  
52  
53  
54  
55  
56  
57  
58  
59  
60

**Categorical Variables Codings**

|                           |           | Parameter coding |      |
|---------------------------|-----------|------------------|------|
|                           |           | (28)             | (29) |
| VASTY2 (SAIR*10000)+VASTY | 403073101 | ,000             | ,000 |
|                           | 403073102 | ,000             | ,000 |
|                           | 403073103 | ,000             | ,000 |
|                           | 403073202 | ,000             | ,000 |
|                           | 403073203 | ,000             | ,000 |
|                           | 403073204 | ,000             | ,000 |
|                           | 403073303 | ,000             | ,000 |
|                           | 403073651 | ,000             | ,000 |
|                           | 403073771 | ,000             | ,000 |
|                           | 403133102 | ,000             | ,000 |
|                           | 403133106 | ,000             | ,000 |
|                           | 403133107 | ,000             | ,000 |
|                           | 403133109 | ,000             | ,000 |
|                           | 403133202 | ,000             | ,000 |
|                           | 403133203 | ,000             | ,000 |
|                           | 403133204 | ,000             | ,000 |
|                           | 403133315 | ,000             | ,000 |
|                           | 403133322 | ,000             | ,000 |
|                           | 403133401 | ,000             | ,000 |
|                           | 403133402 | ,000             | ,000 |
|                           | 403133550 | ,000             | ,000 |
|                           | 403133772 | ,000             | ,000 |
|                           | 403135803 | ,000             | ,000 |
|                           | 404060001 | ,000             | ,000 |
|                           | 404060002 | ,000             | ,000 |

only

## Categorical Variables Codings

|                           |           | Parameter coding |      |
|---------------------------|-----------|------------------|------|
|                           |           | (30)             | (31) |
| VASTY2 (SAIR*10000)+VASTY | 403073101 | ,000             | ,000 |
|                           | 403073102 | ,000             | ,000 |
|                           | 403073103 | ,000             | ,000 |
|                           | 403073202 | ,000             | ,000 |
|                           | 403073203 | ,000             | ,000 |
|                           | 403073204 | ,000             | ,000 |
|                           | 403073303 | ,000             | ,000 |
|                           | 403073651 | ,000             | ,000 |
|                           | 403073771 | ,000             | ,000 |
|                           | 403133102 | ,000             | ,000 |
|                           | 403133106 | ,000             | ,000 |
|                           | 403133107 | ,000             | ,000 |
|                           | 403133109 | ,000             | ,000 |
|                           | 403133202 | ,000             | ,000 |
|                           | 403133203 | ,000             | ,000 |
|                           | 403133204 | ,000             | ,000 |
|                           | 403133315 | ,000             | ,000 |
|                           | 403133322 | ,000             | ,000 |
|                           | 403133401 | ,000             | ,000 |
|                           | 403133402 | ,000             | ,000 |
|                           | 403133550 | ,000             | ,000 |
|                           | 403133772 | ,000             | ,000 |
|                           | 403135803 | ,000             | ,000 |
|                           | 404060001 | ,000             | ,000 |
|                           | 404060002 | ,000             | ,000 |

Only

1  
2  
3  
4  
5  
6  
7  
8  
9  
10  
11  
12  
13  
14  
15  
16  
17  
18  
19  
20  
21  
22  
23  
24  
25  
26  
27  
28  
29  
30  
31  
32  
33  
34  
35  
36  
37  
38  
39  
40  
41  
42  
43  
44  
45  
46  
47  
48  
49  
50  
51  
52  
53  
54  
55  
56  
57  
58  
59  
60

**Categorical Variables Codings**

|                           |           | Parameter coding |      |
|---------------------------|-----------|------------------|------|
|                           |           | (32)             | (33) |
| VASTY2 (SAIR*10000)+VASTY | 403073101 | ,000             | ,000 |
|                           | 403073102 | ,000             | ,000 |
|                           | 403073103 | ,000             | ,000 |
|                           | 403073202 | ,000             | ,000 |
|                           | 403073203 | ,000             | ,000 |
|                           | 403073204 | ,000             | ,000 |
|                           | 403073303 | ,000             | ,000 |
|                           | 403073651 | ,000             | ,000 |
|                           | 403073771 | ,000             | ,000 |
|                           | 403133102 | ,000             | ,000 |
|                           | 403133106 | ,000             | ,000 |
|                           | 403133107 | ,000             | ,000 |
|                           | 403133109 | ,000             | ,000 |
|                           | 403133202 | ,000             | ,000 |
|                           | 403133203 | ,000             | ,000 |
|                           | 403133204 | ,000             | ,000 |
|                           | 403133315 | ,000             | ,000 |
|                           | 403133322 | ,000             | ,000 |
|                           | 403133401 | ,000             | ,000 |
|                           | 403133402 | ,000             | ,000 |
|                           | 403133550 | ,000             | ,000 |
|                           | 403133772 | ,000             | ,000 |
|                           | 403135803 | ,000             | ,000 |
|                           | 404060001 | ,000             | ,000 |
|                           | 404060002 | ,000             | ,000 |

Only

## Categorical Variables Codings

|                           |           | Parameter coding |      |
|---------------------------|-----------|------------------|------|
|                           |           | (34)             | (35) |
| VASTY2 (SAIR*10000)+VASTY | 403073101 | ,000             | ,000 |
|                           | 403073102 | ,000             | ,000 |
|                           | 403073103 | ,000             | ,000 |
|                           | 403073202 | ,000             | ,000 |
|                           | 403073203 | ,000             | ,000 |
|                           | 403073204 | ,000             | ,000 |
|                           | 403073303 | ,000             | ,000 |
|                           | 403073651 | ,000             | ,000 |
|                           | 403073771 | ,000             | ,000 |
|                           | 403133102 | ,000             | ,000 |
|                           | 403133106 | ,000             | ,000 |
|                           | 403133107 | ,000             | ,000 |
|                           | 403133109 | ,000             | ,000 |
|                           | 403133202 | ,000             | ,000 |
|                           | 403133203 | ,000             | ,000 |
|                           | 403133204 | ,000             | ,000 |
|                           | 403133315 | ,000             | ,000 |
|                           | 403133322 | ,000             | ,000 |
|                           | 403133401 | ,000             | ,000 |
|                           | 403133402 | ,000             | ,000 |
|                           | 403133550 | ,000             | ,000 |
|                           | 403133772 | ,000             | ,000 |
|                           | 403135803 | ,000             | ,000 |
|                           | 404060001 | ,000             | ,000 |
|                           | 404060002 | ,000             | ,000 |

Only

## Categorical Variables Codings

|                           |                                         | Frequency | Parameter<br>(1) |
|---------------------------|-----------------------------------------|-----------|------------------|
|                           | 404310003                               | 291       | ,000             |
|                           | 404310004                               | 291       | ,000             |
|                           | 502300005                               | 366       | ,000             |
|                           | 502300006                               | 225       | ,000             |
|                           | 502300007                               | 366       | ,000             |
|                           | 502300214                               | 366       | ,000             |
|                           | 502300411                               | 366       | ,000             |
|                           | 502300415                               | 360       | ,000             |
|                           | 502300416                               | 363       | ,000             |
|                           | 502300811                               | 364       | ,000             |
|                           | 502300913                               | 315       | ,000             |
| weekday veckodag          | 1 måndag                                | 1805      | ,000             |
|                           | 2 tisdag                                | 1812      | 1,000            |
|                           | 3 onsdag                                | 1800      | ,000             |
|                           | 4 torsdag                               | 1794      | ,000             |
|                           | 5 fredag                                | 1788      | ,000             |
|                           | 6 lördag                                | 1735      | ,000             |
|                           | 7 söndag                                | 1741      | ,000             |
| season säsong/period      | 1 januari-mars                          | 3182      | ,000             |
|                           | 2 april-maj                             | 2127      | 1,000            |
|                           | 3 juni-augusti                          | 2911      | ,000             |
|                           | 4 september-oktober                     | 2144      | ,000             |
|                           | 5 november-december                     | 2111      | ,000             |
| bv1 belastning vs paoncil | 1 medelbelastning                       | 5380      | ,000             |
|                           | 2 underbelastning                       | 3222      | 1,000            |
|                           | 3 överbelastning                        | 3873      | ,000             |
| holiday större helg       | 1 ingen större helg                     | 12078     | ,000             |
|                           | 2 större helg (påsk/midsommar/julonyår) | 397       | 1,000            |

## Categorical Variables Codings

|                           |                                         | Parameter coding |       |
|---------------------------|-----------------------------------------|------------------|-------|
|                           |                                         | (2)              | (3)   |
|                           | 404310003                               | ,000             | ,000  |
|                           | 404310004                               | ,000             | ,000  |
|                           | 502300005                               | ,000             | ,000  |
|                           | 502300006                               | ,000             | ,000  |
|                           | 502300007                               | ,000             | ,000  |
|                           | 502300214                               | ,000             | ,000  |
|                           | 502300411                               | ,000             | ,000  |
|                           | 502300415                               | ,000             | ,000  |
|                           | 502300416                               | ,000             | ,000  |
|                           | 502300811                               | ,000             | ,000  |
|                           | 502300913                               | ,000             | ,000  |
| weekday veckodag          | 1 måndag                                | ,000             | ,000  |
|                           | 2 tisdag                                | ,000             | ,000  |
|                           | 3 onsdag                                | 1,000            | ,000  |
|                           | 4 torsdag                               | ,000             | 1,000 |
|                           | 5 fredag                                | ,000             | ,000  |
|                           | 6 lördag                                | ,000             | ,000  |
|                           | 7 söndag                                | ,000             | ,000  |
| season säsong/period      | 1 januari-mars                          | ,000             | ,000  |
|                           | 2 april-maj                             | ,000             | ,000  |
|                           | 3 juni-augusti                          | 1,000            | ,000  |
|                           | 4 september-oktober                     | ,000             | 1,000 |
|                           | 5 november-december                     | ,000             | ,000  |
| bv1 belastning vs paoncil | 1 medelbelastning                       | ,000             |       |
|                           | 2 underbelastning                       | ,000             |       |
|                           | 3 överbelastning                        | 1,000            |       |
| holiday större helg       | 1 ingen större helg                     |                  |       |
|                           | 2 större helg (påsk/midsommar/julonyår) |                  |       |



## Categorical Variables Codings

|                           |                                         | Parameter coding |       |
|---------------------------|-----------------------------------------|------------------|-------|
|                           |                                         | (4)              | (5)   |
|                           | 404310003                               | ,000             | ,000  |
|                           | 404310004                               | ,000             | ,000  |
|                           | 502300005                               | ,000             | ,000  |
|                           | 502300006                               | ,000             | ,000  |
|                           | 502300007                               | ,000             | ,000  |
|                           | 502300214                               | ,000             | ,000  |
|                           | 502300411                               | ,000             | ,000  |
|                           | 502300415                               | ,000             | ,000  |
|                           | 502300416                               | ,000             | ,000  |
|                           | 502300811                               | ,000             | ,000  |
|                           | 502300913                               | ,000             | ,000  |
| weekday veckodag          | 1 måndag                                | ,000             | ,000  |
|                           | 2 tisdag                                | ,000             | ,000  |
|                           | 3 onsdag                                | ,000             | ,000  |
|                           | 4 torsdag                               | ,000             | ,000  |
|                           | 5 fredag                                | 1,000            | ,000  |
|                           | 6 lördag                                | ,000             | 1,000 |
|                           | 7 söndag                                | ,000             | ,000  |
| season säsong/period      | 1 januari-mars                          | ,000             |       |
|                           | 2 april-maj                             | ,000             |       |
|                           | 3 juni-augusti                          | ,000             |       |
|                           | 4 september-oktober                     | ,000             |       |
|                           | 5 november-december                     | 1,000            |       |
| bv1 belastning vs paoncil | 1 medelbelastning                       |                  |       |
|                           | 2 underbelastning                       |                  |       |
|                           | 3 överbelastning                        |                  |       |
| holiday större helg       | 1 ingen större helg                     |                  |       |
|                           | 2 större helg (påsk/midsommar/julonyår) |                  |       |

## Categorical Variables Codings

|                           |                                         | Parameter coding |      |
|---------------------------|-----------------------------------------|------------------|------|
|                           |                                         | (6)              | (7)  |
|                           | 404310003                               | ,000             | ,000 |
|                           | 404310004                               | ,000             | ,000 |
|                           | 502300005                               | ,000             | ,000 |
|                           | 502300006                               | ,000             | ,000 |
|                           | 502300007                               | ,000             | ,000 |
|                           | 502300214                               | ,000             | ,000 |
|                           | 502300411                               | ,000             | ,000 |
|                           | 502300415                               | ,000             | ,000 |
|                           | 502300416                               | ,000             | ,000 |
|                           | 502300811                               | ,000             | ,000 |
|                           | 502300913                               | ,000             | ,000 |
| weekday veckodag          | 1 måndag                                | ,000             |      |
|                           | 2 tisdag                                | ,000             |      |
|                           | 3 onsdag                                | ,000             |      |
|                           | 4 torsdag                               | ,000             |      |
|                           | 5 fredag                                | ,000             |      |
|                           | 6 lördag                                | ,000             |      |
|                           | 7 söndag                                | 1,000            |      |
| season säsong/period      | 1 januari-mars                          |                  |      |
|                           | 2 april-maj                             |                  |      |
|                           | 3 juni-augusti                          |                  |      |
|                           | 4 september-oktober                     |                  |      |
|                           | 5 november-december                     |                  |      |
| bv1 belastning vs paoncil | 1 medelbelastning                       |                  |      |
|                           | 2 underbelastning                       |                  |      |
|                           | 3 överbelastning                        |                  |      |
| holiday större helg       | 1 ingen större helg                     |                  |      |
|                           | 2 större helg (påsk/midsommar/julonyår) |                  |      |

## Categorical Variables Codings

|                           |                                         | Parameter coding |      |
|---------------------------|-----------------------------------------|------------------|------|
|                           |                                         | (8)              | (9)  |
|                           | 404310003                               | ,000             | ,000 |
|                           | 404310004                               | ,000             | ,000 |
|                           | 502300005                               | ,000             | ,000 |
|                           | 502300006                               | ,000             | ,000 |
|                           | 502300007                               | ,000             | ,000 |
|                           | 502300214                               | ,000             | ,000 |
|                           | 502300411                               | ,000             | ,000 |
|                           | 502300415                               | ,000             | ,000 |
|                           | 502300416                               | ,000             | ,000 |
|                           | 502300811                               | ,000             | ,000 |
|                           | 502300913                               | ,000             | ,000 |
| weekday veckodag          | 1 måndag                                |                  |      |
|                           | 2 tisdag                                |                  |      |
|                           | 3 onsdag                                |                  |      |
|                           | 4 torsdag                               |                  |      |
|                           | 5 fredag                                |                  |      |
|                           | 6 lördag                                |                  |      |
|                           | 7 söndag                                |                  |      |
| season säsong/period      | 1 januari-mars                          |                  |      |
|                           | 2 april-maj                             |                  |      |
|                           | 3 juni-augusti                          |                  |      |
|                           | 4 september-oktober                     |                  |      |
|                           | 5 november-december                     |                  |      |
| bv1 belastning vs paoncil | 1 medelbelastning                       |                  |      |
|                           | 2 underbelastning                       |                  |      |
|                           | 3 överbelastning                        |                  |      |
| holiday större helg       | 1 ingen större helg                     |                  |      |
|                           | 2 större helg (påsk/midsommar/julonyår) |                  |      |

## Categorical Variables Codings

|                           |                                         | Parameter coding |      |
|---------------------------|-----------------------------------------|------------------|------|
|                           |                                         | (10)             | (11) |
|                           | 404310003                               | ,000             | ,000 |
|                           | 404310004                               | ,000             | ,000 |
|                           | 502300005                               | ,000             | ,000 |
|                           | 502300006                               | ,000             | ,000 |
|                           | 502300007                               | ,000             | ,000 |
|                           | 502300214                               | ,000             | ,000 |
|                           | 502300411                               | ,000             | ,000 |
|                           | 502300415                               | ,000             | ,000 |
|                           | 502300416                               | ,000             | ,000 |
|                           | 502300811                               | ,000             | ,000 |
|                           | 502300913                               | ,000             | ,000 |
| weekday veckodag          | 1 måndag                                |                  |      |
|                           | 2 tisdag                                |                  |      |
|                           | 3 onsdag                                |                  |      |
|                           | 4 torsdag                               |                  |      |
|                           | 5 fredag                                |                  |      |
|                           | 6 lördag                                |                  |      |
|                           | 7 söndag                                |                  |      |
| season säsong/period      | 1 januari-mars                          |                  |      |
|                           | 2 april-maj                             |                  |      |
|                           | 3 juni-augusti                          |                  |      |
|                           | 4 september-oktober                     |                  |      |
|                           | 5 november-december                     |                  |      |
| bv1 belastning vs paoncil | 1 medelbelastning                       |                  |      |
|                           | 2 underbelastning                       |                  |      |
|                           | 3 överbelastning                        |                  |      |
| holiday större helg       | 1 ingen större helg                     |                  |      |
|                           | 2 större helg (påsk/midsommar/julonyår) |                  |      |

## Categorical Variables Codings

|                           |                                         | Parameter coding |      |
|---------------------------|-----------------------------------------|------------------|------|
|                           |                                         | (12)             | (13) |
|                           | 404310003                               | ,000             | ,000 |
|                           | 404310004                               | ,000             | ,000 |
|                           | 502300005                               | ,000             | ,000 |
|                           | 502300006                               | ,000             | ,000 |
|                           | 502300007                               | ,000             | ,000 |
|                           | 502300214                               | ,000             | ,000 |
|                           | 502300411                               | ,000             | ,000 |
|                           | 502300415                               | ,000             | ,000 |
|                           | 502300416                               | ,000             | ,000 |
|                           | 502300811                               | ,000             | ,000 |
|                           | 502300913                               | ,000             | ,000 |
| weekday veckodag          | 1 måndag                                |                  |      |
|                           | 2 tisdag                                |                  |      |
|                           | 3 onsdag                                |                  |      |
|                           | 4 torsdag                               |                  |      |
|                           | 5 fredag                                |                  |      |
|                           | 6 lördag                                |                  |      |
|                           | 7 söndag                                |                  |      |
| season säsong/period      | 1 januari-mars                          |                  |      |
|                           | 2 april-maj                             |                  |      |
|                           | 3 juni-augusti                          |                  |      |
|                           | 4 september-oktober                     |                  |      |
|                           | 5 november-december                     |                  |      |
| bv1 belastning vs paoncil | 1 medelbelastning                       |                  |      |
|                           | 2 underbelastning                       |                  |      |
|                           | 3 överbelastning                        |                  |      |
| holiday större helg       | 1 ingen större helg                     |                  |      |
|                           | 2 större helg (påsk/midsommar/julonyår) |                  |      |

## Categorical Variables Codings

|                           |                                         | Parameter coding |      |
|---------------------------|-----------------------------------------|------------------|------|
|                           |                                         | (14)             | (15) |
|                           | 404310003                               | ,000             | ,000 |
|                           | 404310004                               | ,000             | ,000 |
|                           | 502300005                               | ,000             | ,000 |
|                           | 502300006                               | ,000             | ,000 |
|                           | 502300007                               | ,000             | ,000 |
|                           | 502300214                               | ,000             | ,000 |
|                           | 502300411                               | ,000             | ,000 |
|                           | 502300415                               | ,000             | ,000 |
|                           | 502300416                               | ,000             | ,000 |
|                           | 502300811                               | ,000             | ,000 |
|                           | 502300913                               | ,000             | ,000 |
| weekday veckodag          | 1 måndag                                |                  |      |
|                           | 2 tisdag                                |                  |      |
|                           | 3 onsdag                                |                  |      |
|                           | 4 torsdag                               |                  |      |
|                           | 5 fredag                                |                  |      |
|                           | 6 lördag                                |                  |      |
|                           | 7 söndag                                |                  |      |
| season säsong/period      | 1 januari-mars                          |                  |      |
|                           | 2 april-maj                             |                  |      |
|                           | 3 juni-augusti                          |                  |      |
|                           | 4 september-oktober                     |                  |      |
|                           | 5 november-december                     |                  |      |
| bv1 belastning vs paoncil | 1 medelbelastning                       |                  |      |
|                           | 2 underbelastning                       |                  |      |
|                           | 3 överbelastning                        |                  |      |
| holiday större helg       | 1 ingen större helg                     |                  |      |
|                           | 2 större helg (påsk/midsommar/julonyår) |                  |      |

## Categorical Variables Codings

|                           |                                         | Parameter coding |      |
|---------------------------|-----------------------------------------|------------------|------|
|                           |                                         | (16)             | (17) |
|                           | 404310003                               | ,000             | ,000 |
|                           | 404310004                               | ,000             | ,000 |
|                           | 502300005                               | ,000             | ,000 |
|                           | 502300006                               | ,000             | ,000 |
|                           | 502300007                               | ,000             | ,000 |
|                           | 502300214                               | ,000             | ,000 |
|                           | 502300411                               | ,000             | ,000 |
|                           | 502300415                               | ,000             | ,000 |
|                           | 502300416                               | ,000             | ,000 |
|                           | 502300811                               | ,000             | ,000 |
|                           | 502300913                               | ,000             | ,000 |
| weekday veckodag          | 1 måndag                                |                  |      |
|                           | 2 tisdag                                |                  |      |
|                           | 3 onsdag                                |                  |      |
|                           | 4 torsdag                               |                  |      |
|                           | 5 fredag                                |                  |      |
|                           | 6 lördag                                |                  |      |
|                           | 7 söndag                                |                  |      |
| season säsong/period      | 1 januari-mars                          |                  |      |
|                           | 2 april-maj                             |                  |      |
|                           | 3 juni-augusti                          |                  |      |
|                           | 4 september-oktober                     |                  |      |
|                           | 5 november-december                     |                  |      |
| bv1 belastning vs paoncil | 1 medelbelastning                       |                  |      |
|                           | 2 underbelastning                       |                  |      |
|                           | 3 överbelastning                        |                  |      |
| holiday större helg       | 1 ingen större helg                     |                  |      |
|                           | 2 större helg (påsk/midsommar/julonyår) |                  |      |

## Categorical Variables Codings

|                           |                                         | Parameter coding |      |
|---------------------------|-----------------------------------------|------------------|------|
|                           |                                         | (18)             | (19) |
|                           | 404310003                               | ,000             | ,000 |
|                           | 404310004                               | ,000             | ,000 |
|                           | 502300005                               | ,000             | ,000 |
|                           | 502300006                               | ,000             | ,000 |
|                           | 502300007                               | ,000             | ,000 |
|                           | 502300214                               | ,000             | ,000 |
|                           | 502300411                               | ,000             | ,000 |
|                           | 502300415                               | ,000             | ,000 |
|                           | 502300416                               | ,000             | ,000 |
|                           | 502300811                               | ,000             | ,000 |
|                           | 502300913                               | ,000             | ,000 |
| weekday veckodag          | 1 måndag                                |                  |      |
|                           | 2 tisdag                                |                  |      |
|                           | 3 onsdag                                |                  |      |
|                           | 4 torsdag                               |                  |      |
|                           | 5 fredag                                |                  |      |
|                           | 6 lördag                                |                  |      |
|                           | 7 söndag                                |                  |      |
| season säsong/period      | 1 januari-mars                          |                  |      |
|                           | 2 april-maj                             |                  |      |
|                           | 3 juni-augusti                          |                  |      |
|                           | 4 september-oktober                     |                  |      |
|                           | 5 november-december                     |                  |      |
| bv1 belastning vs paoncil | 1 medelbelastning                       |                  |      |
|                           | 2 underbelastning                       |                  |      |
|                           | 3 överbelastning                        |                  |      |
| holiday större helg       | 1 ingen större helg                     |                  |      |
|                           | 2 större helg (påsk/midsommar/julonyår) |                  |      |



## Categorical Variables Codings

|                           |                                         | Parameter coding |      |
|---------------------------|-----------------------------------------|------------------|------|
|                           |                                         | (20)             | (21) |
|                           | 404310003                               | ,000             | ,000 |
|                           | 404310004                               | ,000             | ,000 |
|                           | 502300005                               | ,000             | ,000 |
|                           | 502300006                               | ,000             | ,000 |
|                           | 502300007                               | ,000             | ,000 |
|                           | 502300214                               | ,000             | ,000 |
|                           | 502300411                               | ,000             | ,000 |
|                           | 502300415                               | ,000             | ,000 |
|                           | 502300416                               | ,000             | ,000 |
|                           | 502300811                               | ,000             | ,000 |
|                           | 502300913                               | ,000             | ,000 |
| weekday veckodag          | 1 måndag                                |                  |      |
|                           | 2 tisdag                                |                  |      |
|                           | 3 onsdag                                |                  |      |
|                           | 4 torsdag                               |                  |      |
|                           | 5 fredag                                |                  |      |
|                           | 6 lördag                                |                  |      |
|                           | 7 söndag                                |                  |      |
| season säsong/period      | 1 januari-mars                          |                  |      |
|                           | 2 april-maj                             |                  |      |
|                           | 3 juni-augusti                          |                  |      |
|                           | 4 september-oktober                     |                  |      |
|                           | 5 november-december                     |                  |      |
| bv1 belastning vs paoncil | 1 medelbelastning                       |                  |      |
|                           | 2 underbelastning                       |                  |      |
|                           | 3 överbelastning                        |                  |      |
| holiday större helg       | 1 ingen större helg                     |                  |      |
|                           | 2 större helg (påsk/midsommar/julonyår) |                  |      |

## Categorical Variables Codings

|                           |                                         | Parameter coding |      |
|---------------------------|-----------------------------------------|------------------|------|
|                           |                                         | (22)             | (23) |
|                           | 404310003                               | ,000             | ,000 |
|                           | 404310004                               | ,000             | ,000 |
|                           | 502300005                               | ,000             | ,000 |
|                           | 502300006                               | ,000             | ,000 |
|                           | 502300007                               | ,000             | ,000 |
|                           | 502300214                               | ,000             | ,000 |
|                           | 502300411                               | ,000             | ,000 |
|                           | 502300415                               | ,000             | ,000 |
|                           | 502300416                               | ,000             | ,000 |
|                           | 502300811                               | ,000             | ,000 |
|                           | 502300913                               | ,000             | ,000 |
| weekday veckodag          | 1 måndag                                |                  |      |
|                           | 2 tisdag                                |                  |      |
|                           | 3 onsdag                                |                  |      |
|                           | 4 torsdag                               |                  |      |
|                           | 5 fredag                                |                  |      |
|                           | 6 lördag                                |                  |      |
|                           | 7 söndag                                |                  |      |
| season säsong/period      | 1 januari-mars                          |                  |      |
|                           | 2 april-maj                             |                  |      |
|                           | 3 juni-augusti                          |                  |      |
|                           | 4 september-oktober                     |                  |      |
|                           | 5 november-december                     |                  |      |
| bv1 belastning vs paoncil | 1 medelbelastning                       |                  |      |
|                           | 2 underbelastning                       |                  |      |
|                           | 3 överbelastning                        |                  |      |
| holiday större helg       | 1 ingen större helg                     |                  |      |
|                           | 2 större helg (påsk/midsommar/julonyår) |                  |      |

## Categorical Variables Codings

|                           |                                         | Parameter coding |       |
|---------------------------|-----------------------------------------|------------------|-------|
|                           |                                         | (24)             | (25)  |
|                           | 404310003                               | ,000             | 1,000 |
|                           | 404310004                               | ,000             | ,000  |
|                           | 502300005                               | ,000             | ,000  |
|                           | 502300006                               | ,000             | ,000  |
|                           | 502300007                               | ,000             | ,000  |
|                           | 502300214                               | ,000             | ,000  |
|                           | 502300411                               | ,000             | ,000  |
|                           | 502300415                               | ,000             | ,000  |
|                           | 502300416                               | ,000             | ,000  |
|                           | 502300811                               | ,000             | ,000  |
|                           | 502300913                               | ,000             | ,000  |
| weekday veckodag          | 1 måndag                                |                  |       |
|                           | 2 tisdag                                |                  |       |
|                           | 3 onsdag                                |                  |       |
|                           | 4 torsdag                               |                  |       |
|                           | 5 fredag                                |                  |       |
|                           | 6 lördag                                |                  |       |
|                           | 7 söndag                                |                  |       |
| season säsong/period      | 1 januari-mars                          |                  |       |
|                           | 2 april-maj                             |                  |       |
|                           | 3 juni-augusti                          |                  |       |
|                           | 4 september-oktober                     |                  |       |
|                           | 5 november-december                     |                  |       |
| bv1 belastning vs paoncil | 1 medelbelastning                       |                  |       |
|                           | 2 underbelastning                       |                  |       |
|                           | 3 överbelastning                        |                  |       |
| holiday större helg       | 1 ingen större helg                     |                  |       |
|                           | 2 större helg (påsk/midsommar/julonyår) |                  |       |

## Categorical Variables Codings

|                           |                                         | Parameter coding |       |
|---------------------------|-----------------------------------------|------------------|-------|
|                           |                                         | (26)             | (27)  |
|                           | 404310003                               | ,000             | ,000  |
|                           | 404310004                               | 1,000            | ,000  |
|                           | 502300005                               | ,000             | 1,000 |
|                           | 502300006                               | ,000             | ,000  |
|                           | 502300007                               | ,000             | ,000  |
|                           | 502300214                               | ,000             | ,000  |
|                           | 502300411                               | ,000             | ,000  |
|                           | 502300415                               | ,000             | ,000  |
|                           | 502300416                               | ,000             | ,000  |
|                           | 502300811                               | ,000             | ,000  |
|                           | 502300913                               | ,000             | ,000  |
| weekday veckodag          | 1 måndag                                |                  |       |
|                           | 2 tisdag                                |                  |       |
|                           | 3 onsdag                                |                  |       |
|                           | 4 torsdag                               |                  |       |
|                           | 5 fredag                                |                  |       |
|                           | 6 lördag                                |                  |       |
|                           | 7 söndag                                |                  |       |
| season säsong/period      | 1 januari-mars                          |                  |       |
|                           | 2 april-maj                             |                  |       |
|                           | 3 juni-augusti                          |                  |       |
|                           | 4 september-oktober                     |                  |       |
|                           | 5 november-december                     |                  |       |
| bv1 belastning vs paoncil | 1 medelbelastning                       |                  |       |
|                           | 2 underbelastning                       |                  |       |
|                           | 3 överbelastning                        |                  |       |
| holiday större helg       | 1 ingen större helg                     |                  |       |
|                           | 2 större helg (påsk/midsommar/julonyår) |                  |       |

## Categorical Variables Codings

|                           |                                         | Parameter coding |       |
|---------------------------|-----------------------------------------|------------------|-------|
|                           |                                         | (28)             | (29)  |
|                           | 404310003                               | ,000             | ,000  |
|                           | 404310004                               | ,000             | ,000  |
|                           | 502300005                               | ,000             | ,000  |
|                           | 502300006                               | 1,000            | ,000  |
|                           | 502300007                               | ,000             | 1,000 |
|                           | 502300214                               | ,000             | ,000  |
|                           | 502300411                               | ,000             | ,000  |
|                           | 502300415                               | ,000             | ,000  |
|                           | 502300416                               | ,000             | ,000  |
|                           | 502300811                               | ,000             | ,000  |
|                           | 502300913                               | ,000             | ,000  |
| weekday veckodag          | 1 måndag                                |                  |       |
|                           | 2 tisdag                                |                  |       |
|                           | 3 onsdag                                |                  |       |
|                           | 4 torsdag                               |                  |       |
|                           | 5 fredag                                |                  |       |
|                           | 6 lördag                                |                  |       |
|                           | 7 söndag                                |                  |       |
| season säsong/period      | 1 januari-mars                          |                  |       |
|                           | 2 april-maj                             |                  |       |
|                           | 3 juni-augusti                          |                  |       |
|                           | 4 september-oktober                     |                  |       |
|                           | 5 november-december                     |                  |       |
| bv1 belastning vs paoncil | 1 medelbelastning                       |                  |       |
|                           | 2 underbelastning                       |                  |       |
|                           | 3 överbelastning                        |                  |       |
| holiday större helg       | 1 ingen större helg                     |                  |       |
|                           | 2 större helg (påsk/midsommar/julonyår) |                  |       |

## Categorical Variables Codings

|                           |                                         | Parameter coding |       |
|---------------------------|-----------------------------------------|------------------|-------|
|                           |                                         | (30)             | (31)  |
|                           | 404310003                               | ,000             | ,000  |
|                           | 404310004                               | ,000             | ,000  |
|                           | 502300005                               | ,000             | ,000  |
|                           | 502300006                               | ,000             | ,000  |
|                           | 502300007                               | ,000             | ,000  |
|                           | 502300214                               | 1,000            | ,000  |
|                           | 502300411                               | ,000             | 1,000 |
|                           | 502300415                               | ,000             | ,000  |
|                           | 502300416                               | ,000             | ,000  |
|                           | 502300811                               | ,000             | ,000  |
|                           | 502300913                               | ,000             | ,000  |
| weekday veckodag          | 1 måndag                                |                  |       |
|                           | 2 tisdag                                |                  |       |
|                           | 3 onsdag                                |                  |       |
|                           | 4 torsdag                               |                  |       |
|                           | 5 fredag                                |                  |       |
|                           | 6 lördag                                |                  |       |
|                           | 7 söndag                                |                  |       |
| season säsong/period      | 1 januari-mars                          |                  |       |
|                           | 2 april-maj                             |                  |       |
|                           | 3 juni-augusti                          |                  |       |
|                           | 4 september-oktober                     |                  |       |
|                           | 5 november-december                     |                  |       |
| bv1 belastning vs paoncil | 1 medelbelastning                       |                  |       |
|                           | 2 underbelastning                       |                  |       |
|                           | 3 överbelastning                        |                  |       |
| holiday större helg       | 1 ingen större helg                     |                  |       |
|                           | 2 större helg (påsk/midsommar/julonyår) |                  |       |

## Categorical Variables Codings

|                           |                                         | Parameter coding |       |
|---------------------------|-----------------------------------------|------------------|-------|
|                           |                                         | (32)             | (33)  |
|                           | 404310003                               | ,000             | ,000  |
|                           | 404310004                               | ,000             | ,000  |
|                           | 502300005                               | ,000             | ,000  |
|                           | 502300006                               | ,000             | ,000  |
|                           | 502300007                               | ,000             | ,000  |
|                           | 502300214                               | ,000             | ,000  |
|                           | 502300411                               | ,000             | ,000  |
|                           | 502300415                               | 1,000            | ,000  |
|                           | 502300416                               | ,000             | 1,000 |
|                           | 502300811                               | ,000             | ,000  |
|                           | 502300913                               | ,000             | ,000  |
| weekday veckodag          | 1 måndag                                |                  |       |
|                           | 2 tisdag                                |                  |       |
|                           | 3 onsdag                                |                  |       |
|                           | 4 torsdag                               |                  |       |
|                           | 5 fredag                                |                  |       |
|                           | 6 lördag                                |                  |       |
|                           | 7 söndag                                |                  |       |
| season säsong/period      | 1 januari-mars                          |                  |       |
|                           | 2 april-maj                             |                  |       |
|                           | 3 juni-augusti                          |                  |       |
|                           | 4 september-oktober                     |                  |       |
|                           | 5 november-december                     |                  |       |
| bv1 belastning vs paoncil | 1 medelbelastning                       |                  |       |
|                           | 2 underbelastning                       |                  |       |
|                           | 3 överbelastning                        |                  |       |
| holiday större helg       | 1 ingen större helg                     |                  |       |
|                           | 2 större helg (påsk/midsommar/julonyår) |                  |       |

## Categorical Variables Codings

|                           |                                         | Parameter coding |       |
|---------------------------|-----------------------------------------|------------------|-------|
|                           |                                         | (34)             | (35)  |
|                           | 404310003                               | ,000             | ,000  |
|                           | 404310004                               | ,000             | ,000  |
|                           | 502300005                               | ,000             | ,000  |
|                           | 502300006                               | ,000             | ,000  |
|                           | 502300007                               | ,000             | ,000  |
|                           | 502300214                               | ,000             | ,000  |
|                           | 502300411                               | ,000             | ,000  |
|                           | 502300415                               | ,000             | ,000  |
|                           | 502300416                               | ,000             | ,000  |
|                           | 502300811                               | 1,000            | ,000  |
|                           | 502300913                               | ,000             | 1,000 |
| weekday veckodag          | 1 måndag                                |                  |       |
|                           | 2 tisdag                                |                  |       |
|                           | 3 onsdag                                |                  |       |
|                           | 4 torsdag                               |                  |       |
|                           | 5 fredag                                |                  |       |
|                           | 6 lördag                                |                  |       |
|                           | 7 söndag                                |                  |       |
| season säsong/period      | 1 januari-mars                          |                  |       |
|                           | 2 april-maj                             |                  |       |
|                           | 3 juni-augusti                          |                  |       |
|                           | 4 september-oktober                     |                  |       |
|                           | 5 november-december                     |                  |       |
| bv1 belastning vs paoncil | 1 medelbelastning                       |                  |       |
|                           | 2 underbelastning                       |                  |       |
|                           | 3 överbelastning                        |                  |       |
| holiday större helg       | 1 ingen större helg                     |                  |       |
|                           | 2 större helg (påsk/midsommar/julonyår) |                  |       |

## Block 0: Beginning Block



Classification Table<sup>a,b</sup>

|                    |                                                |                                                              |
|--------------------|------------------------------------------------|--------------------------------------------------------------|
| Observed           |                                                |                                                              |
| Step 0             | luonnelt1 luonne highest = tapahtui potilaalle | 0 ingen händelse eller läheltä piti<br>1 tapahtui potilaalle |
| Overall Percentage |                                                |                                                              |

Classification Table<sup>a,b</sup>

|                    |                                                |                                                              |                                     |
|--------------------|------------------------------------------------|--------------------------------------------------------------|-------------------------------------|
| Observed           |                                                |                                                              | Predicted                           |
|                    |                                                |                                                              | luonnelt1 luonne highest = ...      |
|                    |                                                |                                                              | 0 ingen händelse eller läheltä piti |
| Step 0             | luonnelt1 luonne highest = tapahtui potilaalle | 0 ingen händelse eller läheltä piti<br>1 tapahtui potilaalle | 11627<br>848                        |
| Overall Percentage |                                                |                                                              |                                     |

Classification Table<sup>a,b</sup>

|                    |                                                |                                                              |                              |
|--------------------|------------------------------------------------|--------------------------------------------------------------|------------------------------|
| Observed           |                                                |                                                              | Predicted                    |
|                    |                                                |                                                              | luonnelt1 luonne highest ... |
|                    |                                                |                                                              | 1 tapahtui potilaalle        |
| Step 0             | luonnelt1 luonne highest = tapahtui potilaalle | 0 ingen händelse eller läheltä piti<br>1 tapahtui potilaalle | 0<br>0                       |
| Overall Percentage |                                                |                                                              |                              |

Classification Table<sup>a,b</sup>

|                    |                                                |                                                              |                    |
|--------------------|------------------------------------------------|--------------------------------------------------------------|--------------------|
| Observed           |                                                |                                                              | Predicted          |
|                    |                                                |                                                              | Percentage Correct |
| Step 0             | luonnelt1 luonne highest = tapahtui potilaalle | 0 ingen händelse eller läheltä piti<br>1 tapahtui potilaalle | 100,0<br>,0        |
| Overall Percentage |                                                |                                                              | 93,2               |

a. Constant is included in the model.

b. The cut value is ,500

## Variables in the Equation

|                 | B      | S.E. | Wald     | df | Sig. | Exp(B) |
|-----------------|--------|------|----------|----|------|--------|
| Step 0 Constant | -2,618 | ,036 | 5417,889 | 1  | ,000 | ,073   |

## Variables not in the Equation

|                  | Score   | df | Sig. |
|------------------|---------|----|------|
| Step 0 Variables |         |    |      |
| bv1              | 26,218  | 2  | ,000 |
| bv1(1)           | 23,791  | 1  | ,000 |
| bv1(2)           | 11,302  | 1  | ,001 |
| VASTY2           | 299,491 | 35 | ,000 |
| VASTY2(1)        | ,007    | 1  | ,934 |
| VASTY2(2)        | 8,968   | 1  | ,003 |
| VASTY2(3)        | 15,764  | 1  | ,000 |
| VASTY2(4)        | ,453    | 1  | ,501 |
| VASTY2(5)        | ,965    | 1  | ,326 |
| VASTY2(6)        | 14,062  | 1  | ,000 |
| VASTY2(7)        | 12,067  | 1  | ,001 |
| VASTY2(8)        | 1,504   | 1  | ,220 |
| VASTY2(9)        | 1,612   | 1  | ,204 |
| VASTY2(10)       | 55,161  | 1  | ,000 |
| VASTY2(11)       | 11,675  | 1  | ,001 |
| VASTY2(12)       | ,213    | 1  | ,644 |
| VASTY2(13)       | 55,161  | 1  | ,000 |
| VASTY2(14)       | 1,504   | 1  | ,220 |
| VASTY2(15)       | 1,199   | 1  | ,273 |
| VASTY2(16)       | 3,222   | 1  | ,073 |
| VASTY2(17)       | 12,590  | 1  | ,000 |
| VASTY2(18)       | 7,137   | 1  | ,008 |
| VASTY2(19)       | 19,294  | 1  | ,000 |
| VASTY2(20)       | ,030    | 1  | ,863 |
| VASTY2(21)       | ,647    | 1  | ,421 |
| VASTY2(22)       | ,782    | 1  | ,377 |
| VASTY2(23)       | 1,199   | 1  | ,273 |
| VASTY2(24)       | 2,253   | 1  | ,133 |
| VASTY2(25)       | 1,513   | 1  | ,219 |
| VASTY2(26)       | 7,708   | 1  | ,005 |
| VASTY2(27)       | 15,836  | 1  | ,000 |
| VASTY2(28)       | 6,172   | 1  | ,013 |
| VASTY2(29)       | 11,203  | 1  | ,001 |
| VASTY2(30)       | 1,058   | 1  | ,304 |
| VASTY2(31)       | 6,527   | 1  | ,011 |
| VASTY2(32)       | ,544    | 1  | ,461 |
| VASTY2(33)       | ,126    | 1  | ,723 |
| VASTY2(34)       | 14,062  | 1  | ,000 |
| VASTY2(35)       | 15,901  | 1  | ,000 |

**Variables not in the Equation**

|                    | Score   | df | Sig. |
|--------------------|---------|----|------|
| weekday            | 14,938  | 6  | ,021 |
| weekday(1)         | ,984    | 1  | ,321 |
| weekday(2)         | ,599    | 1  | ,439 |
| weekday(3)         | ,376    | 1  | ,540 |
| weekday(4)         | 1,867   | 1  | ,172 |
| weekday(5)         | 3,400   | 1  | ,065 |
| weekday(6)         | 9,074   | 1  | ,003 |
| holiday(1)         | 3,316   | 1  | ,069 |
| season             | 5,196   | 4  | ,268 |
| season(1)          | ,388    | 1  | ,533 |
| season(2)          | 1,566   | 1  | ,211 |
| season(3)          | 2,964   | 1  | ,085 |
| season(4)          | ,650    | 1  | ,420 |
| Overall Statistics | 330,811 | 48 | ,000 |

**Block 1: Method = Enter**

**Omnibus Tests of Model Coefficients**

|             | Chi-square | df | Sig. |
|-------------|------------|----|------|
| Step 1 Step | 340,523    | 48 | ,000 |
| Block       | 340,523    | 48 | ,000 |
| Model       | 340,523    | 48 | ,000 |

**Model Summary**

| Step | -2 Log likelihood     | Cox & Snell R Square | Nagelkerke R Square |
|------|-----------------------|----------------------|---------------------|
| 1    | 5856,348 <sup>a</sup> | ,027                 | ,069                |

a. Estimation terminated at iteration number 7 because parameter estimates changed by less than ,001.

**Classification Table<sup>a</sup>**

| Observed           |                                                |                                                              |
|--------------------|------------------------------------------------|--------------------------------------------------------------|
| Step 1             | luonnelt1 luonne highest = tapahtui potilaalle | 0 ingen händelse eller läheltä piti<br>1 tapahtui potilaalle |
| Overall Percentage |                                                |                                                              |

Classification Table<sup>a</sup>

| Observed           |                                                | Predicted                           |                                     |
|--------------------|------------------------------------------------|-------------------------------------|-------------------------------------|
|                    |                                                | luonnelt1 luonne highest = ...      | 0 ingen händelse eller läheltä piti |
| Step 1             | luonnelt1 luonne highest = tapahtui potilaalle | 0 ingen händelse eller läheltä piti | 11627                               |
|                    |                                                | 1 tapahtui potilaalle               | 848                                 |
| Overall Percentage |                                                |                                     |                                     |

Classification Table<sup>a</sup>

| Observed           |                                                | Predicted                           |                       |
|--------------------|------------------------------------------------|-------------------------------------|-----------------------|
|                    |                                                | luonnelt1 luonne highest ...        | 1 tapahtui potilaalle |
| Step 1             | luonnelt1 luonne highest = tapahtui potilaalle | 0 ingen händelse eller läheltä piti | 0                     |
|                    |                                                | 1 tapahtui potilaalle               | 0                     |
| Overall Percentage |                                                |                                     |                       |

Classification Table<sup>a</sup>

| Observed           |                                                | Predicted                           |       |
|--------------------|------------------------------------------------|-------------------------------------|-------|
|                    |                                                | Percentage Correct                  |       |
| Step 1             | luonnelt1 luonne highest = tapahtui potilaalle | 0 ingen händelse eller läheltä piti | 100,0 |
|                    |                                                | 1 tapahtui potilaalle               | ,0    |
| Overall Percentage |                                                |                                     | 93,2  |

a. The cut value is ,500

## Variables in the Equation

|                         | B      | S.E. | Wald    | df | Sig. | Exp(B) |
|-------------------------|--------|------|---------|----|------|--------|
| Step 1 <sup>a</sup> bv1 |        |      | 8,766   | 2  | ,012 |        |
| bv1(1)                  | -,246  | ,103 | 5,744   | 1  | ,017 | ,782   |
| bv1(2)                  | ,079   | ,086 | ,834    | 1  | ,361 | 1,082  |
| VASTY2                  |        |      | 238,129 | 35 | ,000 |        |
| VASTY2(1)               | ,096   | ,299 | ,102    | 1  | ,750 | 1,100  |
| VASTY2(2)               | ,545   | ,275 | 3,944   | 1  | ,047 | 1,725  |
| VASTY2(3)               | -1,490 | ,467 | 10,197  | 1  | ,001 | ,225   |
| VASTY2(4)               | ,138   | ,294 | ,220    | 1  | ,639 | 1,148  |
| VASTY2(5)               | -,194  | ,325 | ,357    | 1  | ,550 | ,823   |
| VASTY2(6)               | -1,287 | ,440 | 8,574   | 1  | ,003 | ,276   |
| VASTY2(7)               | ,548   | ,277 | 3,911   | 1  | ,048 | 1,729  |
| VASTY2(8)               | -,255  | ,320 | ,632    | 1  | ,427 | ,775   |
| VASTY2(9)               | ,267   | ,291 | ,842    | 1  | ,359 | 1,307  |
| VASTY2(10)              | 1,026  | ,259 | 15,764  | 1  | ,000 | 2,791  |
| VASTY2(11)              | ,616   | ,273 | 5,109   | 1  | ,024 | 1,852  |
| VASTY2(12)              | ,122   | ,295 | ,171    | 1  | ,679 | 1,130  |
| VASTY2(13)              | ,983   | ,261 | 14,230  | 1  | ,000 | 2,673  |
| VASTY2(14)              | -,248  | ,320 | ,597    | 1  | ,440 | ,781   |
| VASTY2(15)              | ,247   | ,288 | ,731    | 1  | ,392 | 1,280  |
| VASTY2(16)              | ,411   | ,331 | 1,546   | 1  | ,214 | 1,509  |
| VASTY2(17)              | -1,079 | ,418 | 6,664   | 1  | ,010 | ,340   |
| VASTY2(18)              | -,668  | ,365 | 3,352   | 1  | ,067 | ,513   |
| VASTY2(19)              | -1,638 | ,551 | 8,843   | 1  | ,003 | ,194   |
| VASTY2(20)              | ,040   | ,314 | ,016    | 1  | ,899 | 1,041  |
| VASTY2(21)              | -,124  | ,312 | ,158    | 1  | ,691 | ,883   |
| VASTY2(22)              | ,316   | ,291 | 1,183   | 1  | ,277 | 1,372  |
| VASTY2(23)              | ,286   | ,288 | ,986    | 1  | ,321 | 1,331  |
| VASTY2(24)              | ,263   | ,286 | ,847    | 1  | ,357 | 1,301  |
| VASTY2(25)              | ,300   | ,301 | ,996    | 1  | ,318 | 1,350  |
| VASTY2(26)              | -,945  | ,419 | 5,078   | 1  | ,024 | ,389   |
| VASTY2(27)              | -1,461 | ,466 | 9,840   | 1  | ,002 | ,232   |
| VASTY2(28)              | -1,012 | ,468 | 4,680   | 1  | ,031 | ,363   |
| VASTY2(29)              | -1,039 | ,401 | 6,709   | 1  | ,010 | ,354   |
| VASTY2(30)              | -,203  | ,316 | ,414    | 1  | ,520 | ,816   |
| VASTY2(31)              | ,499   | ,278 | 3,221   | 1  | ,073 | 1,648  |
| VASTY2(32)              | -,061  | ,313 | ,038    | 1  | ,845 | ,940   |
| VASTY2(33)              | ,012   | ,306 | ,002    | 1  | ,968 | 1,012  |
| VASTY2(34)              | -1,274 | ,439 | 8,429   | 1  | ,004 | ,280   |
| VASTY2(35)              | ,650   | ,279 | 5,444   | 1  | ,020 | 1,915  |
| weekday                 |        |      | 11,843  | 6  | ,066 |        |
| weekday(1)              | -,011  | ,129 | ,008    | 1  | ,929 | ,989   |
| weekday(2)              | -,033  | ,130 | ,066    | 1  | ,798 | ,967   |

## Variables in the Equation

|                     |            | 95% C.I. for EXP(B) |       |
|---------------------|------------|---------------------|-------|
|                     |            | Lower               | Upper |
| Step 1 <sup>a</sup> | bv1        |                     |       |
|                     | bv1(1)     | ,640                | ,956  |
|                     | bv1(2)     | ,914                | 1,280 |
|                     | VASTY2     |                     |       |
|                     | VASTY2(1)  | ,612                | 1,979 |
|                     | VASTY2(2)  | 1,007               | 2,956 |
|                     | VASTY2(3)  | ,090                | ,562  |
|                     | VASTY2(4)  | ,645                | 2,043 |
|                     | VASTY2(5)  | ,435                | 1,557 |
|                     | VASTY2(6)  | ,117                | ,653  |
|                     | VASTY2(7)  | 1,005               | 2,976 |
|                     | VASTY2(8)  | ,414                | 1,452 |
|                     | VASTY2(9)  | ,738                | 2,313 |
|                     | VASTY2(10) | 1,682               | 4,632 |
|                     | VASTY2(11) | 1,085               | 3,160 |
|                     | VASTY2(12) | ,634                | 2,013 |
|                     | VASTY2(13) | 1,604               | 4,456 |
|                     | VASTY2(14) | ,417                | 1,463 |
|                     | VASTY2(15) | ,727                | 2,253 |
|                     | VASTY2(16) | ,789                | 2,887 |
|                     | VASTY2(17) | ,150                | ,771  |
|                     | VASTY2(18) | ,251                | 1,048 |
|                     | VASTY2(19) | ,066                | ,572  |
|                     | VASTY2(20) | ,562                | 1,928 |
|                     | VASTY2(21) | ,479                | 1,628 |
|                     | VASTY2(22) | ,776                | 2,426 |
|                     | VASTY2(23) | ,757                | 2,342 |
|                     | VASTY2(24) | ,743                | 2,280 |
|                     | VASTY2(25) | ,749                | 2,435 |
|                     | VASTY2(26) | ,171                | ,884  |
|                     | VASTY2(27) | ,093                | ,578  |
|                     | VASTY2(28) | ,145                | ,909  |
|                     | VASTY2(29) | ,161                | ,777  |
|                     | VASTY2(30) | ,439                | 1,516 |
|                     | VASTY2(31) | ,955                | 2,843 |
|                     | VASTY2(32) | ,509                | 1,737 |
|                     | VASTY2(33) | ,556                | 1,843 |
|                     | VASTY2(34) | ,118                | ,661  |
|                     | VASTY2(35) | 1,110               | 3,307 |
|                     | weekday    |                     |       |
|                     | weekday(1) | ,767                | 1,274 |
|                     | weekday(2) | ,750                | 1,248 |

Variables in the Equation

|            | B      | S.E. | Wald    | df | Sig. | Exp(B) |
|------------|--------|------|---------|----|------|--------|
| weekday(3) | -,043  | ,130 | ,111    | 1  | ,740 | ,958   |
| weekday(4) | ,042   | ,129 | ,107    | 1  | ,743 | 1,043  |
| weekday(5) | -,225  | ,139 | 2,621   | 1  | ,105 | ,798   |
| weekday(6) | -,361  | ,143 | 6,344   | 1  | ,012 | ,697   |
| holiday(1) | -,435  | ,253 | 2,966   | 1  | ,085 | ,647   |
| season     |        |      | 3,733   | 4  | ,443 |        |
| season(1)  | -,115  | ,113 | 1,020   | 1  | ,313 | ,892   |
| season(2)  | -,110  | ,106 | 1,085   | 1  | ,298 | ,896   |
| season(3)  | ,070   | ,108 | ,423    | 1  | ,516 | 1,073  |
| season(4)  | -,073  | ,115 | ,405    | 1  | ,525 | ,929   |
| Constant   | -2,497 | ,241 | 107,046 | 1  | ,000 | ,082   |

Variables in the Equation

|            | 95% C.I. for EXP(B) |       |
|------------|---------------------|-------|
|            | Lower               | Upper |
| weekday(3) | ,742                | 1,237 |
| weekday(4) | ,810                | 1,343 |
| weekday(5) | ,608                | 1,049 |
| weekday(6) | ,526                | ,923  |
| holiday(1) | ,394                | 1,062 |
| season     |                     |       |
| season(1)  | ,714                | 1,114 |
| season(2)  | ,728                | 1,102 |
| season(3)  | ,868                | 1,327 |
| season(4)  | ,742                | 1,165 |
| Constant   |                     |       |

a. Variable(s) entered on step 1: bv1, VASTY2, weekday, holiday, season.

```
LOGISTIC REGRESSION VARIABLES luonnelt1
/METHOD=ENTER bv2 VASTY2 weekday holiday season
/CONTRAST (bv2)=Indicator(1)
/CONTRAST (VASTY2)=Indicator(1)
/CONTRAST (weekday)=Indicator(1)
/CONTRAST (holiday)=Indicator(1)
/CONTRAST (season)=Indicator(1)
/PRINT=CI(95)
/CRITERIA=PIN(0.05) POUT(0.10) ITERATE(20) CUT(0.5).
```

## Logistic Regression

[DataSet6] C:\cWordjan\Rafaela\_VCS\alla\_tillsammans\abo\_bjo\_vasa\_v1.sav

### Case Processing Summary

| Unweighted Cases <sup>a</sup> |                      | N     | Percent |
|-------------------------------|----------------------|-------|---------|
| Selected Cases                | Included in Analysis | 12475 | 100,0   |
|                               | Missing Cases        | 0     | ,0      |
|                               | Total                | 12475 | 100,0   |
| Unselected Cases              |                      | 0     | ,0      |
| Total                         |                      | 12475 | 100,0   |

a. If weight is in effect, see classification table for the total number of cases.

### Dependent Variable Encoding

| Original Value                      | Internal Value |
|-------------------------------------|----------------|
| 0 ingen händelse eller läheltä piti | 0              |
| 1 tapahtui potilaalle               | 1              |

### Categorical Variables Codings

|                           | Frequency |
|---------------------------|-----------|
| VASTY2 (SAIR*10000)+VASTY | 365       |
| 403073101                 | 362       |
| 403073102                 | 365       |
| 403073103                 | 365       |
| 403073202                 | 365       |
| 403073203                 | 330       |
| 403073204                 | 364       |
| 403073303                 | 362       |
| 403073651                 | 365       |
| 403073771                 | 341       |
| 403133102                 | 365       |
| 403133106                 | 365       |
| 403133107                 | 365       |
| 403133109                 | 365       |
| 403133202                 | 365       |
| 403133203                 | 365       |
| 403133204                 | 365       |
| 403133315                 | 177       |
| 403133322                 | 365       |
| 403133401                 | 362       |
| 403133402                 | 365       |
| 403133550                 | 298       |
| 403133772                 | 365       |
| 403135803                 | 365       |
| 404060001                 | 365       |
| 404060002                 | 366       |
| 404310003                 | 291       |
| 404310004                 | 291       |



## Categorical Variables Codings

|                           |           | Parameter |
|---------------------------|-----------|-----------|
|                           |           | (1)       |
| VASTY2 (SAIR*10000)+VASTY | 403073101 | ,000      |
|                           | 403073102 | 1,000     |
|                           | 403073103 | ,000      |
|                           | 403073202 | ,000      |
|                           | 403073203 | ,000      |
|                           | 403073204 | ,000      |
|                           | 403073303 | ,000      |
|                           | 403073651 | ,000      |
|                           | 403073771 | ,000      |
|                           | 403133102 | ,000      |
|                           | 403133106 | ,000      |
|                           | 403133107 | ,000      |
|                           | 403133109 | ,000      |
|                           | 403133202 | ,000      |
|                           | 403133203 | ,000      |
|                           | 403133204 | ,000      |
|                           | 403133315 | ,000      |
|                           | 403133322 | ,000      |
|                           | 403133401 | ,000      |
|                           | 403133402 | ,000      |
|                           | 403133550 | ,000      |
|                           | 403133772 | ,000      |
|                           | 403135803 | ,000      |
|                           | 404060001 | ,000      |
|                           | 404060002 | ,000      |
|                           | 404310003 | ,000      |
|                           | 404310004 | ,000      |

## Categorical Variables Codings

|                           |           | Parameter |
|---------------------------|-----------|-----------|
|                           |           | (2)       |
| VASTY2 (SAIR*10000)+VASTY | 403073101 | ,000      |
|                           | 403073102 | ,000      |
|                           | 403073103 | 1,000     |
|                           | 403073202 | ,000      |
|                           | 403073203 | ,000      |
|                           | 403073204 | ,000      |
|                           | 403073303 | ,000      |
|                           | 403073651 | ,000      |
|                           | 403073771 | ,000      |
|                           | 403133102 | ,000      |
|                           | 403133106 | ,000      |
|                           | 403133107 | ,000      |
|                           | 403133109 | ,000      |
|                           | 403133202 | ,000      |
|                           | 403133203 | ,000      |
|                           | 403133204 | ,000      |
|                           | 403133315 | ,000      |
|                           | 403133322 | ,000      |
|                           | 403133401 | ,000      |
|                           | 403133402 | ,000      |
|                           | 403133550 | ,000      |
|                           | 403133772 | ,000      |
|                           | 403135803 | ,000      |
|                           | 404060001 | ,000      |
|                           | 404060002 | ,000      |
|                           | 404310003 | ,000      |
|                           | 404310004 | ,000      |

## Categorical Variables Codings

|                           |           | Parameter |
|---------------------------|-----------|-----------|
|                           |           | (3)       |
| VASTY2 (SAIR*10000)+VASTY | 403073101 | ,000      |
|                           | 403073102 | ,000      |
|                           | 403073103 | ,000      |
|                           | 403073202 | 1,000     |
|                           | 403073203 | ,000      |
|                           | 403073204 | ,000      |
|                           | 403073303 | ,000      |
|                           | 403073651 | ,000      |
|                           | 403073771 | ,000      |
|                           | 403133102 | ,000      |
|                           | 403133106 | ,000      |
|                           | 403133107 | ,000      |
|                           | 403133109 | ,000      |
|                           | 403133202 | ,000      |
|                           | 403133203 | ,000      |
|                           | 403133204 | ,000      |
|                           | 403133315 | ,000      |
|                           | 403133322 | ,000      |
|                           | 403133401 | ,000      |
|                           | 403133402 | ,000      |
|                           | 403133550 | ,000      |
|                           | 403133772 | ,000      |
|                           | 403135803 | ,000      |
|                           | 404060001 | ,000      |
|                           | 404060002 | ,000      |
|                           | 404310003 | ,000      |
|                           | 404310004 | ,000      |

## Categorical Variables Codings

|                           |           | Parameter |
|---------------------------|-----------|-----------|
|                           |           | (4)       |
| VASTY2 (SAIR*10000)+VASTY | 403073101 | ,000      |
|                           | 403073102 | ,000      |
|                           | 403073103 | ,000      |
|                           | 403073202 | ,000      |
|                           | 403073203 | 1,000     |
|                           | 403073204 | ,000      |
|                           | 403073303 | ,000      |
|                           | 403073651 | ,000      |
|                           | 403073771 | ,000      |
|                           | 403133102 | ,000      |
|                           | 403133106 | ,000      |
|                           | 403133107 | ,000      |
|                           | 403133109 | ,000      |
|                           | 403133202 | ,000      |
|                           | 403133203 | ,000      |
|                           | 403133204 | ,000      |
|                           | 403133315 | ,000      |
|                           | 403133322 | ,000      |
|                           | 403133401 | ,000      |
|                           | 403133402 | ,000      |
|                           | 403133550 | ,000      |
|                           | 403133772 | ,000      |
|                           | 403135803 | ,000      |
|                           | 404060001 | ,000      |
|                           | 404060002 | ,000      |
|                           | 404310003 | ,000      |
|                           | 404310004 | ,000      |

**Categorical Variables Codings**

|                           |           | Parameter |
|---------------------------|-----------|-----------|
|                           |           | (5)       |
| VASTY2 (SAIR*10000)+VASTY | 403073101 | ,000      |
|                           | 403073102 | ,000      |
|                           | 403073103 | ,000      |
|                           | 403073202 | ,000      |
|                           | 403073203 | ,000      |
|                           | 403073204 | 1,000     |
|                           | 403073303 | ,000      |
|                           | 403073651 | ,000      |
|                           | 403073771 | ,000      |
|                           | 403133102 | ,000      |
|                           | 403133106 | ,000      |
|                           | 403133107 | ,000      |
|                           | 403133109 | ,000      |
|                           | 403133202 | ,000      |
|                           | 403133203 | ,000      |
|                           | 403133204 | ,000      |
|                           | 403133315 | ,000      |
|                           | 403133322 | ,000      |
|                           | 403133401 | ,000      |
|                           | 403133402 | ,000      |
|                           | 403133550 | ,000      |
|                           | 403133772 | ,000      |
|                           | 403135803 | ,000      |
|                           | 404060001 | ,000      |
|                           | 404060002 | ,000      |
|                           | 404310003 | ,000      |
|                           | 404310004 | ,000      |

BMJ

## Categorical Variables Codings

|                           |           | Parameter |
|---------------------------|-----------|-----------|
|                           |           | (6)       |
| VASTY2 (SAIR*10000)+VASTY | 403073101 | ,000      |
|                           | 403073102 | ,000      |
|                           | 403073103 | ,000      |
|                           | 403073202 | ,000      |
|                           | 403073203 | ,000      |
|                           | 403073204 | ,000      |
|                           | 403073303 | 1,000     |
|                           | 403073651 | ,000      |
|                           | 403073771 | ,000      |
|                           | 403133102 | ,000      |
|                           | 403133106 | ,000      |
|                           | 403133107 | ,000      |
|                           | 403133109 | ,000      |
|                           | 403133202 | ,000      |
|                           | 403133203 | ,000      |
|                           | 403133204 | ,000      |
|                           | 403133315 | ,000      |
|                           | 403133322 | ,000      |
|                           | 403133401 | ,000      |
|                           | 403133402 | ,000      |
|                           | 403133550 | ,000      |
|                           | 403133772 | ,000      |
|                           | 403135803 | ,000      |
|                           | 404060001 | ,000      |
|                           | 404060002 | ,000      |
|                           | 404310003 | ,000      |
|                           | 404310004 | ,000      |

## Categorical Variables Codings

|                           |           | Parameter |
|---------------------------|-----------|-----------|
|                           |           | (7)       |
| VASTY2 (SAIR*10000)+VASTY | 403073101 | ,000      |
|                           | 403073102 | ,000      |
|                           | 403073103 | ,000      |
|                           | 403073202 | ,000      |
|                           | 403073203 | ,000      |
|                           | 403073204 | ,000      |
|                           | 403073303 | ,000      |
|                           | 403073651 | 1,000     |
|                           | 403073771 | ,000      |
|                           | 403133102 | ,000      |
|                           | 403133106 | ,000      |
|                           | 403133107 | ,000      |
|                           | 403133109 | ,000      |
|                           | 403133202 | ,000      |
|                           | 403133203 | ,000      |
|                           | 403133204 | ,000      |
|                           | 403133315 | ,000      |
|                           | 403133322 | ,000      |
|                           | 403133401 | ,000      |
|                           | 403133402 | ,000      |
|                           | 403133550 | ,000      |
|                           | 403133772 | ,000      |
|                           | 403135803 | ,000      |
|                           | 404060001 | ,000      |
|                           | 404060002 | ,000      |
|                           | 404310003 | ,000      |
|                           | 404310004 | ,000      |

## Categorical Variables Codings

|                           |           | Parameter |
|---------------------------|-----------|-----------|
|                           |           | (8)       |
| VASTY2 (SAIR*10000)+VASTY | 403073101 | ,000      |
|                           | 403073102 | ,000      |
|                           | 403073103 | ,000      |
|                           | 403073202 | ,000      |
|                           | 403073203 | ,000      |
|                           | 403073204 | ,000      |
|                           | 403073303 | ,000      |
|                           | 403073651 | ,000      |
|                           | 403073771 | 1,000     |
|                           | 403133102 | ,000      |
|                           | 403133106 | ,000      |
|                           | 403133107 | ,000      |
|                           | 403133109 | ,000      |
|                           | 403133202 | ,000      |
|                           | 403133203 | ,000      |
|                           | 403133204 | ,000      |
|                           | 403133315 | ,000      |
|                           | 403133322 | ,000      |
|                           | 403133401 | ,000      |
|                           | 403133402 | ,000      |
|                           | 403133550 | ,000      |
|                           | 403133772 | ,000      |
|                           | 403135803 | ,000      |
|                           | 404060001 | ,000      |
|                           | 404060002 | ,000      |
|                           | 404310003 | ,000      |
|                           | 404310004 | ,000      |



1  
2  
3  
4  
5  
6  
7  
8  
9  
10  
11  
12  
13  
14  
15  
16  
17  
18  
19  
20  
21  
22  
23  
24  
25  
26  
27  
28  
29  
30  
31  
32  
33  
34  
35  
36  
37  
38  
39  
40  
41  
42  
43  
44  
45  
46  
47  
48  
49  
50  
51  
52  
53  
54  
55  
56  
57  
58  
59  
60

**Categorical Variables Codings**

|                           |           | Parameter |
|---------------------------|-----------|-----------|
|                           |           | (9)       |
| VASTY2 (SAIR*10000)+VASTY | 403073101 | ,000      |
|                           | 403073102 | ,000      |
|                           | 403073103 | ,000      |
|                           | 403073202 | ,000      |
|                           | 403073203 | ,000      |
|                           | 403073204 | ,000      |
|                           | 403073303 | ,000      |
|                           | 403073651 | ,000      |
|                           | 403073771 | ,000      |
|                           | 403133102 | 1,000     |
|                           | 403133106 | ,000      |
|                           | 403133107 | ,000      |
|                           | 403133109 | ,000      |
|                           | 403133202 | ,000      |
|                           | 403133203 | ,000      |
|                           | 403133204 | ,000      |
|                           | 403133315 | ,000      |
|                           | 403133322 | ,000      |
|                           | 403133401 | ,000      |
|                           | 403133402 | ,000      |
|                           | 403133550 | ,000      |
|                           | 403133772 | ,000      |
|                           | 403135803 | ,000      |
|                           | 404060001 | ,000      |
|                           | 404060002 | ,000      |
|                           | 404310003 | ,000      |
|                           | 404310004 | ,000      |

BMJ

## Categorical Variables Codings

|                           |           | Parameter |
|---------------------------|-----------|-----------|
|                           |           | (10)      |
| VASTY2 (SAIR*10000)+VASTY | 403073101 | ,000      |
|                           | 403073102 | ,000      |
|                           | 403073103 | ,000      |
|                           | 403073202 | ,000      |
|                           | 403073203 | ,000      |
|                           | 403073204 | ,000      |
|                           | 403073303 | ,000      |
|                           | 403073651 | ,000      |
|                           | 403073771 | ,000      |
|                           | 403133102 | ,000      |
|                           | 403133106 | 1,000     |
|                           | 403133107 | ,000      |
|                           | 403133109 | ,000      |
|                           | 403133202 | ,000      |
|                           | 403133203 | ,000      |
|                           | 403133204 | ,000      |
|                           | 403133315 | ,000      |
|                           | 403133322 | ,000      |
|                           | 403133401 | ,000      |
|                           | 403133402 | ,000      |
|                           | 403133550 | ,000      |
|                           | 403133772 | ,000      |
|                           | 403135803 | ,000      |
|                           | 404060001 | ,000      |
|                           | 404060002 | ,000      |
|                           | 404310003 | ,000      |
|                           | 404310004 | ,000      |

1  
2  
3  
4  
5  
6  
7  
8  
9  
10  
11  
12  
13  
14  
15  
16  
17  
18  
19  
20  
21  
22  
23  
24  
25  
26  
27  
28  
29  
30  
31  
32  
33  
34  
35  
36  
37  
38  
39  
40  
41  
42  
43  
44  
45  
46  
47  
48  
49  
50  
51  
52  
53  
54  
55  
56  
57  
58  
59  
60

**Categorical Variables Codings**

|                           |           | Parameter |
|---------------------------|-----------|-----------|
|                           |           | (1)       |
| VASTY2 (SAIR*10000)+VASTY | 403073101 | ,000      |
|                           | 403073102 | ,000      |
|                           | 403073103 | ,000      |
|                           | 403073202 | ,000      |
|                           | 403073203 | ,000      |
|                           | 403073204 | ,000      |
|                           | 403073303 | ,000      |
|                           | 403073651 | ,000      |
|                           | 403073771 | ,000      |
|                           | 403133102 | ,000      |
|                           | 403133106 | ,000      |
|                           | 403133107 | 1,000     |
|                           | 403133109 | ,000      |
|                           | 403133202 | ,000      |
|                           | 403133203 | ,000      |
|                           | 403133204 | ,000      |
|                           | 403133315 | ,000      |
|                           | 403133322 | ,000      |
|                           | 403133401 | ,000      |
|                           | 403133402 | ,000      |
|                           | 403133550 | ,000      |
|                           | 403133772 | ,000      |
|                           | 403135803 | ,000      |
|                           | 404060001 | ,000      |
|                           | 404060002 | ,000      |
|                           | 404310003 | ,000      |
|                           | 404310004 | ,000      |

BMJ

## Categorical Variables Codings

|                           |           | Parameter |
|---------------------------|-----------|-----------|
|                           |           | (12)      |
| VASTY2 (SAIR*10000)+VASTY | 403073101 | ,000      |
|                           | 403073102 | ,000      |
|                           | 403073103 | ,000      |
|                           | 403073202 | ,000      |
|                           | 403073203 | ,000      |
|                           | 403073204 | ,000      |
|                           | 403073303 | ,000      |
|                           | 403073651 | ,000      |
|                           | 403073771 | ,000      |
|                           | 403133102 | ,000      |
|                           | 403133106 | ,000      |
|                           | 403133107 | ,000      |
|                           | 403133109 | 1,000     |
|                           | 403133202 | ,000      |
|                           | 403133203 | ,000      |
|                           | 403133204 | ,000      |
|                           | 403133315 | ,000      |
|                           | 403133322 | ,000      |
|                           | 403133401 | ,000      |
|                           | 403133402 | ,000      |
|                           | 403133550 | ,000      |
|                           | 403133772 | ,000      |
|                           | 403135803 | ,000      |
|                           | 404060001 | ,000      |
|                           | 404060002 | ,000      |
|                           | 404310003 | ,000      |
|                           | 404310004 | ,000      |

1  
2  
3  
4  
5  
6  
7  
8  
9  
10  
11  
12  
13  
14  
15  
16  
17  
18  
19  
20  
21  
22  
23  
24  
25  
26  
27  
28  
29  
30  
31  
32  
33  
34  
35  
36  
37  
38  
39  
40  
41  
42  
43  
44  
45  
46  
47  
48  
49  
50  
51  
52  
53  
54  
55  
56  
57  
58  
59  
60

**Categorical Variables Codings**

|                           |           | Parameter |
|---------------------------|-----------|-----------|
|                           |           | (13)      |
| VASTY2 (SAIR*10000)+VASTY | 403073101 | ,000      |
|                           | 403073102 | ,000      |
|                           | 403073103 | ,000      |
|                           | 403073202 | ,000      |
|                           | 403073203 | ,000      |
|                           | 403073204 | ,000      |
|                           | 403073303 | ,000      |
|                           | 403073651 | ,000      |
|                           | 403073771 | ,000      |
|                           | 403133102 | ,000      |
|                           | 403133106 | ,000      |
|                           | 403133107 | ,000      |
|                           | 403133109 | ,000      |
|                           | 403133202 | 1,000     |
|                           | 403133203 | ,000      |
|                           | 403133204 | ,000      |
|                           | 403133315 | ,000      |
|                           | 403133322 | ,000      |
|                           | 403133401 | ,000      |
|                           | 403133402 | ,000      |
|                           | 403133550 | ,000      |
|                           | 403133772 | ,000      |
|                           | 403135803 | ,000      |
|                           | 404060001 | ,000      |
|                           | 404060002 | ,000      |
|                           | 404310003 | ,000      |
|                           | 404310004 | ,000      |

BMJ

## Categorical Variables Codings

|                           |           | Parameter |
|---------------------------|-----------|-----------|
|                           |           | (14)      |
| VASTY2 (SAIR*10000)+VASTY | 403073101 | ,000      |
|                           | 403073102 | ,000      |
|                           | 403073103 | ,000      |
|                           | 403073202 | ,000      |
|                           | 403073203 | ,000      |
|                           | 403073204 | ,000      |
|                           | 403073303 | ,000      |
|                           | 403073651 | ,000      |
|                           | 403073771 | ,000      |
|                           | 403133102 | ,000      |
|                           | 403133106 | ,000      |
|                           | 403133107 | ,000      |
|                           | 403133109 | ,000      |
|                           | 403133202 | ,000      |
|                           | 403133203 | 1,000     |
|                           | 403133204 | ,000      |
|                           | 403133315 | ,000      |
|                           | 403133322 | ,000      |
|                           | 403133401 | ,000      |
|                           | 403133402 | ,000      |
|                           | 403133550 | ,000      |
|                           | 403133772 | ,000      |
|                           | 403135803 | ,000      |
|                           | 404060001 | ,000      |
|                           | 404060002 | ,000      |
|                           | 404310003 | ,000      |
|                           | 404310004 | ,000      |

1  
2  
3  
4  
5  
6  
7  
8  
9  
10  
11  
12  
13  
14  
15  
16  
17  
18  
19  
20  
21  
22  
23  
24  
25  
26  
27  
28  
29  
30  
31  
32  
33  
34  
35  
36  
37  
38  
39  
40  
41  
42  
43  
44  
45  
46  
47  
48  
49  
50  
51  
52  
53  
54  
55  
56  
57  
58  
59  
60

**Categorical Variables Codings**

|                           |           | Parameter |
|---------------------------|-----------|-----------|
|                           |           | (15)      |
| VASTY2 (SAIR*10000)+VASTY | 403073101 | ,000      |
|                           | 403073102 | ,000      |
|                           | 403073103 | ,000      |
|                           | 403073202 | ,000      |
|                           | 403073203 | ,000      |
|                           | 403073204 | ,000      |
|                           | 403073303 | ,000      |
|                           | 403073651 | ,000      |
|                           | 403073771 | ,000      |
|                           | 403133102 | ,000      |
|                           | 403133106 | ,000      |
|                           | 403133107 | ,000      |
|                           | 403133109 | ,000      |
|                           | 403133202 | ,000      |
|                           | 403133203 | ,000      |
|                           | 403133204 | 1,000     |
|                           | 403133315 | ,000      |
|                           | 403133322 | ,000      |
|                           | 403133401 | ,000      |
|                           | 403133402 | ,000      |
|                           | 403133550 | ,000      |
|                           | 403133772 | ,000      |
|                           | 403135803 | ,000      |
|                           | 404060001 | ,000      |
|                           | 404060002 | ,000      |
|                           | 404310003 | ,000      |
|                           | 404310004 | ,000      |

BMJ

## Categorical Variables Codings

|                           |           | Parameter |
|---------------------------|-----------|-----------|
|                           |           | (16)      |
| VASTY2 (SAIR*10000)+VASTY | 403073101 | ,000      |
|                           | 403073102 | ,000      |
|                           | 403073103 | ,000      |
|                           | 403073202 | ,000      |
|                           | 403073203 | ,000      |
|                           | 403073204 | ,000      |
|                           | 403073303 | ,000      |
|                           | 403073651 | ,000      |
|                           | 403073771 | ,000      |
|                           | 403133102 | ,000      |
|                           | 403133106 | ,000      |
|                           | 403133107 | ,000      |
|                           | 403133109 | ,000      |
|                           | 403133202 | ,000      |
|                           | 403133203 | ,000      |
|                           | 403133204 | ,000      |
|                           | 403133315 | 1,000     |
|                           | 403133322 | ,000      |
|                           | 403133401 | ,000      |
|                           | 403133402 | ,000      |
|                           | 403133550 | ,000      |
|                           | 403133772 | ,000      |
|                           | 403135803 | ,000      |
|                           | 404060001 | ,000      |
|                           | 404060002 | ,000      |
|                           | 404310003 | ,000      |
|                           | 404310004 | ,000      |



1  
2  
3  
4  
5  
6  
7  
8  
9  
10  
11  
12  
13  
14  
15  
16  
17  
18  
19  
20  
21  
22  
23  
24  
25  
26  
27  
28  
29  
30  
31  
32  
33  
34  
35  
36  
37  
38  
39  
40  
41  
42  
43  
44  
45  
46  
47  
48  
49  
50  
51  
52  
53  
54  
55  
56  
57  
58  
59  
60

**Categorical Variables Codings**

|                           |           | Parameter |
|---------------------------|-----------|-----------|
|                           |           | (17)      |
| VASTY2 (SAIR*10000)+VASTY | 403073101 | ,000      |
|                           | 403073102 | ,000      |
|                           | 403073103 | ,000      |
|                           | 403073202 | ,000      |
|                           | 403073203 | ,000      |
|                           | 403073204 | ,000      |
|                           | 403073303 | ,000      |
|                           | 403073651 | ,000      |
|                           | 403073771 | ,000      |
|                           | 403133102 | ,000      |
|                           | 403133106 | ,000      |
|                           | 403133107 | ,000      |
|                           | 403133109 | ,000      |
|                           | 403133202 | ,000      |
|                           | 403133203 | ,000      |
|                           | 403133204 | ,000      |
|                           | 403133315 | ,000      |
|                           | 403133322 | 1,000     |
|                           | 403133401 | ,000      |
|                           | 403133402 | ,000      |
|                           | 403133550 | ,000      |
|                           | 403133772 | ,000      |
|                           | 403135803 | ,000      |
|                           | 404060001 | ,000      |
|                           | 404060002 | ,000      |
|                           | 404310003 | ,000      |
|                           | 404310004 | ,000      |

BMJ

## Categorical Variables Codings

|                           |           | Parameter |
|---------------------------|-----------|-----------|
|                           |           | (18)      |
| VASTY2 (SAIR*10000)+VASTY | 403073101 | ,000      |
|                           | 403073102 | ,000      |
|                           | 403073103 | ,000      |
|                           | 403073202 | ,000      |
|                           | 403073203 | ,000      |
|                           | 403073204 | ,000      |
|                           | 403073303 | ,000      |
|                           | 403073651 | ,000      |
|                           | 403073771 | ,000      |
|                           | 403133102 | ,000      |
|                           | 403133106 | ,000      |
|                           | 403133107 | ,000      |
|                           | 403133109 | ,000      |
|                           | 403133202 | ,000      |
|                           | 403133203 | ,000      |
|                           | 403133204 | ,000      |
|                           | 403133315 | ,000      |
|                           | 403133322 | ,000      |
|                           | 403133401 | 1,000     |
|                           | 403133402 | ,000      |
|                           | 403133550 | ,000      |
|                           | 403133772 | ,000      |
|                           | 403135803 | ,000      |
|                           | 404060001 | ,000      |
|                           | 404060002 | ,000      |
|                           | 404310003 | ,000      |
|                           | 404310004 | ,000      |

## Categorical Variables Codings

|                           |           | Parameter |
|---------------------------|-----------|-----------|
|                           |           | (19)      |
| VASTY2 (SAIR*10000)+VASTY | 403073101 | ,000      |
|                           | 403073102 | ,000      |
|                           | 403073103 | ,000      |
|                           | 403073202 | ,000      |
|                           | 403073203 | ,000      |
|                           | 403073204 | ,000      |
|                           | 403073303 | ,000      |
|                           | 403073651 | ,000      |
|                           | 403073771 | ,000      |
|                           | 403133102 | ,000      |
|                           | 403133106 | ,000      |
|                           | 403133107 | ,000      |
|                           | 403133109 | ,000      |
|                           | 403133202 | ,000      |
|                           | 403133203 | ,000      |
|                           | 403133204 | ,000      |
|                           | 403133315 | ,000      |
|                           | 403133322 | ,000      |
|                           | 403133401 | ,000      |
|                           | 403133402 | 1,000     |
|                           | 403133550 | ,000      |
|                           | 403133772 | ,000      |
|                           | 403135803 | ,000      |
|                           | 404060001 | ,000      |
|                           | 404060002 | ,000      |
|                           | 404310003 | ,000      |
|                           | 404310004 | ,000      |

## Categorical Variables Codings

|                           |           | Parameter |
|---------------------------|-----------|-----------|
|                           |           | (20)      |
| VASTY2 (SAIR*10000)+VASTY | 403073101 | ,000      |
|                           | 403073102 | ,000      |
|                           | 403073103 | ,000      |
|                           | 403073202 | ,000      |
|                           | 403073203 | ,000      |
|                           | 403073204 | ,000      |
|                           | 403073303 | ,000      |
|                           | 403073651 | ,000      |
|                           | 403073771 | ,000      |
|                           | 403133102 | ,000      |
|                           | 403133106 | ,000      |
|                           | 403133107 | ,000      |
|                           | 403133109 | ,000      |
|                           | 403133202 | ,000      |
|                           | 403133203 | ,000      |
|                           | 403133204 | ,000      |
|                           | 403133315 | ,000      |
|                           | 403133322 | ,000      |
|                           | 403133401 | ,000      |
|                           | 403133402 | ,000      |
|                           | 403133550 | 1,000     |
|                           | 403133772 | ,000      |
|                           | 403135803 | ,000      |
|                           | 404060001 | ,000      |
|                           | 404060002 | ,000      |
|                           | 404310003 | ,000      |
|                           | 404310004 | ,000      |

## Categorical Variables Codings

|                           |           | Parameter |
|---------------------------|-----------|-----------|
|                           |           | (21)      |
| VASTY2 (SAIR*10000)+VASTY | 403073101 | ,000      |
|                           | 403073102 | ,000      |
|                           | 403073103 | ,000      |
|                           | 403073202 | ,000      |
|                           | 403073203 | ,000      |
|                           | 403073204 | ,000      |
|                           | 403073303 | ,000      |
|                           | 403073651 | ,000      |
|                           | 403073771 | ,000      |
|                           | 403133102 | ,000      |
|                           | 403133106 | ,000      |
|                           | 403133107 | ,000      |
|                           | 403133109 | ,000      |
|                           | 403133202 | ,000      |
|                           | 403133203 | ,000      |
|                           | 403133204 | ,000      |
|                           | 403133315 | ,000      |
|                           | 403133322 | ,000      |
|                           | 403133401 | ,000      |
|                           | 403133402 | ,000      |
|                           | 403133550 | ,000      |
|                           | 403133772 | 1,000     |
|                           | 403135803 | ,000      |
|                           | 404060001 | ,000      |
|                           | 404060002 | ,000      |
|                           | 404310003 | ,000      |
|                           | 404310004 | ,000      |

## Categorical Variables Codings

|                           |           | Parameter |
|---------------------------|-----------|-----------|
|                           |           | (22)      |
| VASTY2 (SAIR*10000)+VASTY | 403073101 | ,000      |
|                           | 403073102 | ,000      |
|                           | 403073103 | ,000      |
|                           | 403073202 | ,000      |
|                           | 403073203 | ,000      |
|                           | 403073204 | ,000      |
|                           | 403073303 | ,000      |
|                           | 403073651 | ,000      |
|                           | 403073771 | ,000      |
|                           | 403133102 | ,000      |
|                           | 403133106 | ,000      |
|                           | 403133107 | ,000      |
|                           | 403133109 | ,000      |
|                           | 403133202 | ,000      |
|                           | 403133203 | ,000      |
|                           | 403133204 | ,000      |
|                           | 403133315 | ,000      |
|                           | 403133322 | ,000      |
|                           | 403133401 | ,000      |
|                           | 403133402 | ,000      |
|                           | 403133550 | ,000      |
|                           | 403133772 | ,000      |
|                           | 403135803 | 1,000     |
|                           | 404060001 | ,000      |
|                           | 404060002 | ,000      |
|                           | 404310003 | ,000      |
|                           | 404310004 | ,000      |

## Categorical Variables Codings

|                           |           | Parameter |
|---------------------------|-----------|-----------|
|                           |           | (23)      |
| VASTY2 (SAIR*10000)+VASTY | 403073101 | ,000      |
|                           | 403073102 | ,000      |
|                           | 403073103 | ,000      |
|                           | 403073202 | ,000      |
|                           | 403073203 | ,000      |
|                           | 403073204 | ,000      |
|                           | 403073303 | ,000      |
|                           | 403073651 | ,000      |
|                           | 403073771 | ,000      |
|                           | 403133102 | ,000      |
|                           | 403133106 | ,000      |
|                           | 403133107 | ,000      |
|                           | 403133109 | ,000      |
|                           | 403133202 | ,000      |
|                           | 403133203 | ,000      |
|                           | 403133204 | ,000      |
|                           | 403133315 | ,000      |
|                           | 403133322 | ,000      |
|                           | 403133401 | ,000      |
|                           | 403133402 | ,000      |
|                           | 403133550 | ,000      |
|                           | 403133772 | ,000      |
|                           | 403135803 | ,000      |
|                           | 404060001 | 1,000     |
|                           | 404060002 | ,000      |
|                           | 404310003 | ,000      |
|                           | 404310004 | ,000      |

## Categorical Variables Codings

|                           |           | Parameter |
|---------------------------|-----------|-----------|
|                           |           | (24)      |
| VASTY2 (SAIR*10000)+VASTY | 403073101 | ,000      |
|                           | 403073102 | ,000      |
|                           | 403073103 | ,000      |
|                           | 403073202 | ,000      |
|                           | 403073203 | ,000      |
|                           | 403073204 | ,000      |
|                           | 403073303 | ,000      |
|                           | 403073651 | ,000      |
|                           | 403073771 | ,000      |
|                           | 403133102 | ,000      |
|                           | 403133106 | ,000      |
|                           | 403133107 | ,000      |
|                           | 403133109 | ,000      |
|                           | 403133202 | ,000      |
|                           | 403133203 | ,000      |
|                           | 403133204 | ,000      |
|                           | 403133315 | ,000      |
|                           | 403133322 | ,000      |
|                           | 403133401 | ,000      |
|                           | 403133402 | ,000      |
|                           | 403133550 | ,000      |
|                           | 403133772 | ,000      |
|                           | 403135803 | ,000      |
|                           | 404060001 | ,000      |
|                           | 404060002 | 1,000     |
|                           | 404310003 | ,000      |
|                           | 404310004 | ,000      |



## Categorical Variables Codings

|                           |           | Parameter |
|---------------------------|-----------|-----------|
|                           |           | (25)      |
| VASTY2 (SAIR*10000)+VASTY | 403073101 | ,000      |
|                           | 403073102 | ,000      |
|                           | 403073103 | ,000      |
|                           | 403073202 | ,000      |
|                           | 403073203 | ,000      |
|                           | 403073204 | ,000      |
|                           | 403073303 | ,000      |
|                           | 403073651 | ,000      |
|                           | 403073771 | ,000      |
|                           | 403133102 | ,000      |
|                           | 403133106 | ,000      |
|                           | 403133107 | ,000      |
|                           | 403133109 | ,000      |
|                           | 403133202 | ,000      |
|                           | 403133203 | ,000      |
|                           | 403133204 | ,000      |
|                           | 403133315 | ,000      |
|                           | 403133322 | ,000      |
|                           | 403133401 | ,000      |
|                           | 403133402 | ,000      |
|                           | 403133550 | ,000      |
|                           | 403133772 | ,000      |
|                           | 403135803 | ,000      |
|                           | 404060001 | ,000      |
|                           | 404060002 | ,000      |
|                           | 404310003 | 1,000     |
|                           | 404310004 | ,000      |

## Categorical Variables Codings

|                           |           | Parameter |
|---------------------------|-----------|-----------|
|                           |           | (26)      |
| VASTY2 (SAIR*10000)+VASTY | 403073101 | ,000      |
|                           | 403073102 | ,000      |
|                           | 403073103 | ,000      |
|                           | 403073202 | ,000      |
|                           | 403073203 | ,000      |
|                           | 403073204 | ,000      |
|                           | 403073303 | ,000      |
|                           | 403073651 | ,000      |
|                           | 403073771 | ,000      |
|                           | 403133102 | ,000      |
|                           | 403133106 | ,000      |
|                           | 403133107 | ,000      |
|                           | 403133109 | ,000      |
|                           | 403133202 | ,000      |
|                           | 403133203 | ,000      |
|                           | 403133204 | ,000      |
|                           | 403133315 | ,000      |
|                           | 403133322 | ,000      |
|                           | 403133401 | ,000      |
|                           | 403133402 | ,000      |
|                           | 403133550 | ,000      |
|                           | 403133772 | ,000      |
|                           | 403135803 | ,000      |
|                           | 404060001 | ,000      |
|                           | 404060002 | ,000      |
|                           | 404310003 | ,000      |
|                           | 404310004 | 1,000     |

1  
2  
3  
4  
5  
6  
7  
8  
9  
10  
11  
12  
13  
14  
15  
16  
17  
18  
19  
20  
21  
22  
23  
24  
25  
26  
27  
28  
29  
30  
31  
32  
33  
34  
35  
36  
37  
38  
39  
40  
41  
42  
43  
44  
45  
46  
47  
48  
49  
50  
51  
52  
53  
54  
55  
56  
57  
58  
59  
60

**Categorical Variables Codings**

|                           |           | Parameter |
|---------------------------|-----------|-----------|
|                           |           | (27)      |
| VASTY2 (SAIR*10000)+VASTY | 403073101 | ,000      |
|                           | 403073102 | ,000      |
|                           | 403073103 | ,000      |
|                           | 403073202 | ,000      |
|                           | 403073203 | ,000      |
|                           | 403073204 | ,000      |
|                           | 403073303 | ,000      |
|                           | 403073651 | ,000      |
|                           | 403073771 | ,000      |
|                           | 403133102 | ,000      |
|                           | 403133106 | ,000      |
|                           | 403133107 | ,000      |
|                           | 403133109 | ,000      |
|                           | 403133202 | ,000      |
|                           | 403133203 | ,000      |
|                           | 403133204 | ,000      |
|                           | 403133315 | ,000      |
|                           | 403133322 | ,000      |
|                           | 403133401 | ,000      |
|                           | 403133402 | ,000      |
|                           | 403133550 | ,000      |
|                           | 403133772 | ,000      |
|                           | 403135803 | ,000      |
|                           | 404060001 | ,000      |
|                           | 404060002 | ,000      |
|                           | 404310003 | ,000      |
|                           | 404310004 | ,000      |

BMJ

## Categorical Variables Codings

|                           |           | Parameter |
|---------------------------|-----------|-----------|
|                           |           | (28)      |
| VASTY2 (SAIR*10000)+VASTY | 403073101 | ,000      |
|                           | 403073102 | ,000      |
|                           | 403073103 | ,000      |
|                           | 403073202 | ,000      |
|                           | 403073203 | ,000      |
|                           | 403073204 | ,000      |
|                           | 403073303 | ,000      |
|                           | 403073651 | ,000      |
|                           | 403073771 | ,000      |
|                           | 403133102 | ,000      |
|                           | 403133106 | ,000      |
|                           | 403133107 | ,000      |
|                           | 403133109 | ,000      |
|                           | 403133202 | ,000      |
|                           | 403133203 | ,000      |
|                           | 403133204 | ,000      |
|                           | 403133315 | ,000      |
|                           | 403133322 | ,000      |
|                           | 403133401 | ,000      |
|                           | 403133402 | ,000      |
|                           | 403133550 | ,000      |
|                           | 403133772 | ,000      |
|                           | 403135803 | ,000      |
|                           | 404060001 | ,000      |
|                           | 404060002 | ,000      |
|                           | 404310003 | ,000      |
|                           | 404310004 | ,000      |

1  
2  
3  
4  
5  
6  
7  
8  
9  
10  
11  
12  
13  
14  
15  
16  
17  
18  
19  
20  
21  
22  
23  
24  
25  
26  
27  
28  
29  
30  
31  
32  
33  
34  
35  
36  
37  
38  
39  
40  
41  
42  
43  
44  
45  
46  
47  
48  
49  
50  
51  
52  
53  
54  
55  
56  
57  
58  
59  
60

**Categorical Variables Codings**

|                           |           | Parameter |
|---------------------------|-----------|-----------|
|                           |           | (29)      |
| VASTY2 (SAIR*10000)+VASTY | 403073101 | ,000      |
|                           | 403073102 | ,000      |
|                           | 403073103 | ,000      |
|                           | 403073202 | ,000      |
|                           | 403073203 | ,000      |
|                           | 403073204 | ,000      |
|                           | 403073303 | ,000      |
|                           | 403073651 | ,000      |
|                           | 403073771 | ,000      |
|                           | 403133102 | ,000      |
|                           | 403133106 | ,000      |
|                           | 403133107 | ,000      |
|                           | 403133109 | ,000      |
|                           | 403133202 | ,000      |
|                           | 403133203 | ,000      |
|                           | 403133204 | ,000      |
|                           | 403133315 | ,000      |
|                           | 403133322 | ,000      |
|                           | 403133401 | ,000      |
|                           | 403133402 | ,000      |
|                           | 403133550 | ,000      |
|                           | 403133772 | ,000      |
|                           | 403135803 | ,000      |
|                           | 404060001 | ,000      |
|                           | 404060002 | ,000      |
|                           | 404310003 | ,000      |
|                           | 404310004 | ,000      |

BMJ

## Categorical Variables Codings

|                           |           | Parameter |
|---------------------------|-----------|-----------|
|                           |           | (30)      |
| VASTY2 (SAIR*10000)+VASTY | 403073101 | ,000      |
|                           | 403073102 | ,000      |
|                           | 403073103 | ,000      |
|                           | 403073202 | ,000      |
|                           | 403073203 | ,000      |
|                           | 403073204 | ,000      |
|                           | 403073303 | ,000      |
|                           | 403073651 | ,000      |
|                           | 403073771 | ,000      |
|                           | 403133102 | ,000      |
|                           | 403133106 | ,000      |
|                           | 403133107 | ,000      |
|                           | 403133109 | ,000      |
|                           | 403133202 | ,000      |
|                           | 403133203 | ,000      |
|                           | 403133204 | ,000      |
|                           | 403133315 | ,000      |
|                           | 403133322 | ,000      |
|                           | 403133401 | ,000      |
|                           | 403133402 | ,000      |
|                           | 403133550 | ,000      |
|                           | 403133772 | ,000      |
|                           | 403135803 | ,000      |
|                           | 404060001 | ,000      |
|                           | 404060002 | ,000      |
|                           | 404310003 | ,000      |
|                           | 404310004 | ,000      |

1  
2  
3  
4  
5  
6  
7  
8  
9  
10  
11  
12  
13  
14  
15  
16  
17  
18  
19  
20  
21  
22  
23  
24  
25  
26  
27  
28  
29  
30  
31  
32  
33  
34  
35  
36  
37  
38  
39  
40  
41  
42  
43  
44  
45  
46  
47  
48  
49  
50  
51  
52  
53  
54  
55  
56  
57  
58  
59  
60

**Categorical Variables Codings**

|                           |           | Parameter |
|---------------------------|-----------|-----------|
|                           |           | (31)      |
| VASTY2 (SAIR*10000)+VASTY | 403073101 | ,000      |
|                           | 403073102 | ,000      |
|                           | 403073103 | ,000      |
|                           | 403073202 | ,000      |
|                           | 403073203 | ,000      |
|                           | 403073204 | ,000      |
|                           | 403073303 | ,000      |
|                           | 403073651 | ,000      |
|                           | 403073771 | ,000      |
|                           | 403133102 | ,000      |
|                           | 403133106 | ,000      |
|                           | 403133107 | ,000      |
|                           | 403133109 | ,000      |
|                           | 403133202 | ,000      |
|                           | 403133203 | ,000      |
|                           | 403133204 | ,000      |
|                           | 403133315 | ,000      |
|                           | 403133322 | ,000      |
|                           | 403133401 | ,000      |
|                           | 403133402 | ,000      |
|                           | 403133550 | ,000      |
|                           | 403133772 | ,000      |
|                           | 403135803 | ,000      |
|                           | 404060001 | ,000      |
|                           | 404060002 | ,000      |
|                           | 404310003 | ,000      |
|                           | 404310004 | ,000      |

BMJ

## Categorical Variables Codings

|                           |           | Parameter |
|---------------------------|-----------|-----------|
|                           |           | (32)      |
| VASTY2 (SAIR*10000)+VASTY | 403073101 | ,000      |
|                           | 403073102 | ,000      |
|                           | 403073103 | ,000      |
|                           | 403073202 | ,000      |
|                           | 403073203 | ,000      |
|                           | 403073204 | ,000      |
|                           | 403073303 | ,000      |
|                           | 403073651 | ,000      |
|                           | 403073771 | ,000      |
|                           | 403133102 | ,000      |
|                           | 403133106 | ,000      |
|                           | 403133107 | ,000      |
|                           | 403133109 | ,000      |
|                           | 403133202 | ,000      |
|                           | 403133203 | ,000      |
|                           | 403133204 | ,000      |
|                           | 403133315 | ,000      |
|                           | 403133322 | ,000      |
|                           | 403133401 | ,000      |
|                           | 403133402 | ,000      |
|                           | 403133550 | ,000      |
|                           | 403133772 | ,000      |
|                           | 403135803 | ,000      |
|                           | 404060001 | ,000      |
|                           | 404060002 | ,000      |
|                           | 404310003 | ,000      |
|                           | 404310004 | ,000      |



1  
2  
3  
4  
5  
6  
7  
8  
9  
10  
11  
12  
13  
14  
15  
16  
17  
18  
19  
20  
21  
22  
23  
24  
25  
26  
27  
28  
29  
30  
31  
32  
33  
34  
35  
36  
37  
38  
39  
40  
41  
42  
43  
44  
45  
46  
47  
48  
49  
50  
51  
52  
53  
54  
55  
56  
57  
58  
59  
60

**Categorical Variables Codings**

|                           |           | Parameter |
|---------------------------|-----------|-----------|
|                           |           | (33)      |
| VASTY2 (SAIR*10000)+VASTY | 403073101 | ,000      |
|                           | 403073102 | ,000      |
|                           | 403073103 | ,000      |
|                           | 403073202 | ,000      |
|                           | 403073203 | ,000      |
|                           | 403073204 | ,000      |
|                           | 403073303 | ,000      |
|                           | 403073651 | ,000      |
|                           | 403073771 | ,000      |
|                           | 403133102 | ,000      |
|                           | 403133106 | ,000      |
|                           | 403133107 | ,000      |
|                           | 403133109 | ,000      |
|                           | 403133202 | ,000      |
|                           | 403133203 | ,000      |
|                           | 403133204 | ,000      |
|                           | 403133315 | ,000      |
|                           | 403133322 | ,000      |
|                           | 403133401 | ,000      |
|                           | 403133402 | ,000      |
|                           | 403133550 | ,000      |
|                           | 403133772 | ,000      |
|                           | 403135803 | ,000      |
|                           | 404060001 | ,000      |
|                           | 404060002 | ,000      |
|                           | 404310003 | ,000      |
|                           | 404310004 | ,000      |

BMJ

## Categorical Variables Codings

|                           |           | Parameter |
|---------------------------|-----------|-----------|
|                           |           | (34)      |
| VASTY2 (SAIR*10000)+VASTY | 403073101 | ,000      |
|                           | 403073102 | ,000      |
|                           | 403073103 | ,000      |
|                           | 403073202 | ,000      |
|                           | 403073203 | ,000      |
|                           | 403073204 | ,000      |
|                           | 403073303 | ,000      |
|                           | 403073651 | ,000      |
|                           | 403073771 | ,000      |
|                           | 403133102 | ,000      |
|                           | 403133106 | ,000      |
|                           | 403133107 | ,000      |
|                           | 403133109 | ,000      |
|                           | 403133202 | ,000      |
|                           | 403133203 | ,000      |
|                           | 403133204 | ,000      |
|                           | 403133315 | ,000      |
|                           | 403133322 | ,000      |
|                           | 403133401 | ,000      |
|                           | 403133402 | ,000      |
|                           | 403133550 | ,000      |
|                           | 403133772 | ,000      |
|                           | 403135803 | ,000      |
|                           | 404060001 | ,000      |
|                           | 404060002 | ,000      |
|                           | 404310003 | ,000      |
|                           | 404310004 | ,000      |

1  
2  
3  
4  
5  
6  
7  
8  
9  
10  
11  
12  
13  
14  
15  
16  
17  
18  
19  
20  
21  
22  
23  
24  
25  
26  
27  
28  
29  
30  
31  
32  
33  
34  
35  
36  
37  
38  
39  
40  
41  
42  
43  
44  
45  
46  
47  
48  
49  
50  
51  
52  
53  
54  
55  
56  
57  
58  
59  
60

**Categorical Variables Codings**

|                           |           | Paramete... |
|---------------------------|-----------|-------------|
|                           |           | (35)        |
| VASTY2 (SAIR*10000)+VASTY | 403073101 | ,000        |
|                           | 403073102 | ,000        |
|                           | 403073103 | ,000        |
|                           | 403073202 | ,000        |
|                           | 403073203 | ,000        |
|                           | 403073204 | ,000        |
|                           | 403073303 | ,000        |
|                           | 403073651 | ,000        |
|                           | 403073771 | ,000        |
|                           | 403133102 | ,000        |
|                           | 403133106 | ,000        |
|                           | 403133107 | ,000        |
|                           | 403133109 | ,000        |
|                           | 403133202 | ,000        |
|                           | 403133203 | ,000        |
|                           | 403133204 | ,000        |
|                           | 403133315 | ,000        |
|                           | 403133322 | ,000        |
|                           | 403133401 | ,000        |
|                           | 403133402 | ,000        |
|                           | 403133550 | ,000        |
|                           | 403133772 | ,000        |
|                           | 403135803 | ,000        |
|                           | 404060001 | ,000        |
|                           | 404060002 | ,000        |
|                           | 404310003 | ,000        |
|                           | 404310004 | ,000        |

BMJ

## Categorical Variables Codings

|                                             |                                         | Frequency |
|---------------------------------------------|-----------------------------------------|-----------|
|                                             | 502300005                               | 366       |
|                                             | 502300006                               | 225       |
|                                             | 502300007                               | 366       |
|                                             | 502300214                               | 366       |
|                                             | 502300411                               | 366       |
|                                             | 502300415                               | 360       |
|                                             | 502300416                               | 363       |
|                                             | 502300811                               | 364       |
|                                             | 502300913                               | 315       |
| weekday veckodag                            | 1 måndag                                | 1805      |
|                                             | 2 tisdag                                | 1812      |
|                                             | 3 onsdag                                | 1800      |
|                                             | 4 torsdag                               | 1794      |
|                                             | 5 fredag                                | 1788      |
|                                             | 6 lördag                                | 1735      |
|                                             | 7 söndag                                | 1741      |
| season säsong/period                        | 1 januari-mars                          | 3182      |
|                                             | 2 april-maj                             | 2127      |
|                                             | 3 juni-augusti                          | 2911      |
|                                             | 4 september-oktober                     | 2144      |
|                                             | 5 november-december                     | 2111      |
| bv2 belastning vs paoncil halva intervallet | 1 medelbelastning                       | 2788      |
|                                             | 2 underbelastning                       | 4419      |
|                                             | 3 överbelastning                        | 5268      |
| holiday större helg                         | 1 ingen större helg                     | 12078     |
|                                             | 2 större helg (påsk/midsommar/julonyår) | 397       |

## Categorical Variables Codings

|                                             |                                         | Parameter |
|---------------------------------------------|-----------------------------------------|-----------|
|                                             |                                         | (1)       |
|                                             | 502300005                               | ,000      |
|                                             | 502300006                               | ,000      |
|                                             | 502300007                               | ,000      |
|                                             | 502300214                               | ,000      |
|                                             | 502300411                               | ,000      |
|                                             | 502300415                               | ,000      |
|                                             | 502300416                               | ,000      |
|                                             | 502300811                               | ,000      |
|                                             | 502300913                               | ,000      |
| weekday veckodag                            | 1 måndag                                | ,000      |
|                                             | 2 tisdag                                | 1,000     |
|                                             | 3 onsdag                                | ,000      |
|                                             | 4 torsdag                               | ,000      |
|                                             | 5 fredag                                | ,000      |
|                                             | 6 lördag                                | ,000      |
|                                             | 7 söndag                                | ,000      |
| season säsong/period                        | 1 januari-mars                          | ,000      |
|                                             | 2 april-maj                             | 1,000     |
|                                             | 3 juni-augusti                          | ,000      |
|                                             | 4 september-oktober                     | ,000      |
|                                             | 5 november-december                     | ,000      |
| bv2 belastning vs paoncil halva intervallet | 1 medelbelastning                       | ,000      |
|                                             | 2 underbelastning                       | 1,000     |
|                                             | 3 överbelastning                        | ,000      |
| holiday större helg                         | 1 ingen större helg                     | ,000      |
|                                             | 2 större helg (påsk/midsommar/julonyår) | 1,000     |

## Categorical Variables Codings

|                                             |                                         | Parameter |
|---------------------------------------------|-----------------------------------------|-----------|
|                                             |                                         | (2)       |
|                                             | 502300005                               | ,000      |
|                                             | 502300006                               | ,000      |
|                                             | 502300007                               | ,000      |
|                                             | 502300214                               | ,000      |
|                                             | 502300411                               | ,000      |
|                                             | 502300415                               | ,000      |
|                                             | 502300416                               | ,000      |
|                                             | 502300811                               | ,000      |
|                                             | 502300913                               | ,000      |
| weekday veckodag                            | 1 måndag                                | ,000      |
|                                             | 2 tisdag                                | ,000      |
|                                             | 3 onsdag                                | 1,000     |
|                                             | 4 torsdag                               | ,000      |
|                                             | 5 fredag                                | ,000      |
|                                             | 6 lördag                                | ,000      |
|                                             | 7 söndag                                | ,000      |
| season säsong/period                        | 1 januari-mars                          | ,000      |
|                                             | 2 april-maj                             | ,000      |
|                                             | 3 juni-augusti                          | 1,000     |
|                                             | 4 september-oktober                     | ,000      |
|                                             | 5 november-december                     | ,000      |
| bv2 belastning vs paoncil halva intervallet | 1 medelbelastning                       | ,000      |
|                                             | 2 underbelastning                       | ,000      |
|                                             | 3 överbelastning                        | 1,000     |
| holiday större helg                         | 1 ingen större helg                     |           |
|                                             | 2 större helg (påsk/midsommar/julonyår) |           |

## Categorical Variables Codings

|                                             |                                         | Parameter |
|---------------------------------------------|-----------------------------------------|-----------|
|                                             |                                         | (3)       |
|                                             | 502300005                               | ,000      |
|                                             | 502300006                               | ,000      |
|                                             | 502300007                               | ,000      |
|                                             | 502300214                               | ,000      |
|                                             | 502300411                               | ,000      |
|                                             | 502300415                               | ,000      |
|                                             | 502300416                               | ,000      |
|                                             | 502300811                               | ,000      |
|                                             | 502300913                               | ,000      |
| weekday veckodag                            | 1 måndag                                | ,000      |
|                                             | 2 tisdag                                | ,000      |
|                                             | 3 onsdag                                | ,000      |
|                                             | 4 torsdag                               | 1,000     |
|                                             | 5 fredag                                | ,000      |
|                                             | 6 lördag                                | ,000      |
|                                             | 7 söndag                                | ,000      |
| season säsong/period                        | 1 januari-mars                          | ,000      |
|                                             | 2 april-maj                             | ,000      |
|                                             | 3 juni-augusti                          | ,000      |
|                                             | 4 september-oktober                     | 1,000     |
|                                             | 5 november-december                     | ,000      |
| bv2 belastning vs paoncil halva intervallet | 1 medelbelastning                       |           |
|                                             | 2 underbelastning                       |           |
|                                             | 3 överbelastning                        |           |
| holiday större helg                         | 1 ingen större helg                     |           |
|                                             | 2 större helg (påsk/midsommar/julonyår) |           |

## Categorical Variables Codings

|                                             |                                         | Parameter |
|---------------------------------------------|-----------------------------------------|-----------|
|                                             |                                         | (4)       |
|                                             | 502300005                               | ,000      |
|                                             | 502300006                               | ,000      |
|                                             | 502300007                               | ,000      |
|                                             | 502300214                               | ,000      |
|                                             | 502300411                               | ,000      |
|                                             | 502300415                               | ,000      |
|                                             | 502300416                               | ,000      |
|                                             | 502300811                               | ,000      |
|                                             | 502300913                               | ,000      |
| weekday veckodag                            | 1 måndag                                | ,000      |
|                                             | 2 tisdag                                | ,000      |
|                                             | 3 onsdag                                | ,000      |
|                                             | 4 torsdag                               | ,000      |
|                                             | 5 fredag                                | 1,000     |
|                                             | 6 lördag                                | ,000      |
|                                             | 7 söndag                                | ,000      |
| season säsong/period                        | 1 januari-mars                          | ,000      |
|                                             | 2 april-maj                             | ,000      |
|                                             | 3 juni-augusti                          | ,000      |
|                                             | 4 september-oktober                     | ,000      |
|                                             | 5 november-december                     | 1,000     |
| bv2 belastning vs paoncil halva intervallet | 1 medelbelastning                       |           |
|                                             | 2 underbelastning                       |           |
|                                             | 3 överbelastning                        |           |
| holiday större helg                         | 1 ingen större helg                     |           |
|                                             | 2 större helg (påsk/midsommar/julonyår) |           |



## Categorical Variables Codings

|                                             |                                         | Parameter |
|---------------------------------------------|-----------------------------------------|-----------|
|                                             |                                         | (5)       |
|                                             | 502300005                               | ,000      |
|                                             | 502300006                               | ,000      |
|                                             | 502300007                               | ,000      |
|                                             | 502300214                               | ,000      |
|                                             | 502300411                               | ,000      |
|                                             | 502300415                               | ,000      |
|                                             | 502300416                               | ,000      |
|                                             | 502300811                               | ,000      |
|                                             | 502300913                               | ,000      |
| weekday veckodag                            | 1 måndag                                | ,000      |
|                                             | 2 tisdag                                | ,000      |
|                                             | 3 onsdag                                | ,000      |
|                                             | 4 torsdag                               | ,000      |
|                                             | 5 fredag                                | ,000      |
|                                             | 6 lördag                                | 1,000     |
|                                             | 7 söndag                                | ,000      |
| season säsong/period                        | 1 januari-mars                          |           |
|                                             | 2 april-maj                             |           |
|                                             | 3 juni-augusti                          |           |
|                                             | 4 september-oktober                     |           |
|                                             | 5 november-december                     |           |
| bv2 belastning vs paoncil halva intervallet | 1 medelbelastning                       |           |
|                                             | 2 underbelastning                       |           |
|                                             | 3 överbelastning                        |           |
| holiday större helg                         | 1 ingen större helg                     |           |
|                                             | 2 större helg (påsk/midsommar/julonyår) |           |

## Categorical Variables Codings

|                                             |                                         | Parameter |
|---------------------------------------------|-----------------------------------------|-----------|
|                                             |                                         | (6)       |
|                                             | 502300005                               | ,000      |
|                                             | 502300006                               | ,000      |
|                                             | 502300007                               | ,000      |
|                                             | 502300214                               | ,000      |
|                                             | 502300411                               | ,000      |
|                                             | 502300415                               | ,000      |
|                                             | 502300416                               | ,000      |
|                                             | 502300811                               | ,000      |
|                                             | 502300913                               | ,000      |
| weekday veckodag                            | 1 måndag                                | ,000      |
|                                             | 2 tisdag                                | ,000      |
|                                             | 3 onsdag                                | ,000      |
|                                             | 4 torsdag                               | ,000      |
|                                             | 5 fredag                                | ,000      |
|                                             | 6 lördag                                | ,000      |
|                                             | 7 söndag                                | 1,000     |
| season säsong/period                        | 1 januari-mars                          |           |
|                                             | 2 april-maj                             |           |
|                                             | 3 juni-augusti                          |           |
|                                             | 4 september-oktober                     |           |
|                                             | 5 november-december                     |           |
| bv2 belastning vs paoncil halva intervallet | 1 medelbelastning                       |           |
|                                             | 2 underbelastning                       |           |
|                                             | 3 överbelastning                        |           |
| holiday större helg                         | 1 ingen större helg                     |           |
|                                             | 2 större helg (påsk/midsommar/julonyår) |           |

## Categorical Variables Codings

|                                             |                                         | Parameter |
|---------------------------------------------|-----------------------------------------|-----------|
|                                             |                                         | (7)       |
|                                             | 502300005                               | ,000      |
|                                             | 502300006                               | ,000      |
|                                             | 502300007                               | ,000      |
|                                             | 502300214                               | ,000      |
|                                             | 502300411                               | ,000      |
|                                             | 502300415                               | ,000      |
|                                             | 502300416                               | ,000      |
|                                             | 502300811                               | ,000      |
|                                             | 502300913                               | ,000      |
| weekday veckodag                            | 1 måndag                                |           |
|                                             | 2 tisdag                                |           |
|                                             | 3 onsdag                                |           |
|                                             | 4 torsdag                               |           |
|                                             | 5 fredag                                |           |
|                                             | 6 lördag                                |           |
|                                             | 7 söndag                                |           |
| season säsong/period                        | 1 januari-mars                          |           |
|                                             | 2 april-maj                             |           |
|                                             | 3 juni-augusti                          |           |
|                                             | 4 september-oktober                     |           |
|                                             | 5 november-december                     |           |
| bv2 belastning vs paoncil halva intervallet | 1 medelbelastning                       |           |
|                                             | 2 underbelastning                       |           |
|                                             | 3 överbelastning                        |           |
| holiday större helg                         | 1 ingen större helg                     |           |
|                                             | 2 större helg (påsk/midsommar/julonyår) |           |

## Categorical Variables Codings

|                                             |                                         | Parameter |
|---------------------------------------------|-----------------------------------------|-----------|
|                                             |                                         | (8)       |
|                                             | 502300005                               | ,000      |
|                                             | 502300006                               | ,000      |
|                                             | 502300007                               | ,000      |
|                                             | 502300214                               | ,000      |
|                                             | 502300411                               | ,000      |
|                                             | 502300415                               | ,000      |
|                                             | 502300416                               | ,000      |
|                                             | 502300811                               | ,000      |
|                                             | 502300913                               | ,000      |
| weekday veckodag                            | 1 måndag                                |           |
|                                             | 2 tisdag                                |           |
|                                             | 3 onsdag                                |           |
|                                             | 4 torsdag                               |           |
|                                             | 5 fredag                                |           |
|                                             | 6 lördag                                |           |
|                                             | 7 söndag                                |           |
| season säsong/period                        | 1 januari-mars                          |           |
|                                             | 2 april-maj                             |           |
|                                             | 3 juni-augusti                          |           |
|                                             | 4 september-oktober                     |           |
|                                             | 5 november-december                     |           |
| bv2 belastning vs paoncil halva intervallet | 1 medelbelastning                       |           |
|                                             | 2 underbelastning                       |           |
|                                             | 3 överbelastning                        |           |
| holiday större helg                         | 1 ingen större helg                     |           |
|                                             | 2 större helg (påsk/midsommar/julonyår) |           |

## Categorical Variables Codings

|                                             |                                         | Parameter |
|---------------------------------------------|-----------------------------------------|-----------|
|                                             |                                         | (9)       |
|                                             | 502300005                               | ,000      |
|                                             | 502300006                               | ,000      |
|                                             | 502300007                               | ,000      |
|                                             | 502300214                               | ,000      |
|                                             | 502300411                               | ,000      |
|                                             | 502300415                               | ,000      |
|                                             | 502300416                               | ,000      |
|                                             | 502300811                               | ,000      |
|                                             | 502300913                               | ,000      |
| weekday veckodag                            | 1 måndag                                |           |
|                                             | 2 tisdag                                |           |
|                                             | 3 onsdag                                |           |
|                                             | 4 torsdag                               |           |
|                                             | 5 fredag                                |           |
|                                             | 6 lördag                                |           |
|                                             | 7 söndag                                |           |
| season säsong/period                        | 1 januari-mars                          |           |
|                                             | 2 april-maj                             |           |
|                                             | 3 juni-augusti                          |           |
|                                             | 4 september-oktober                     |           |
|                                             | 5 november-december                     |           |
| bv2 belastning vs paoncil halva intervallet | 1 medelbelastning                       |           |
|                                             | 2 underbelastning                       |           |
|                                             | 3 överbelastning                        |           |
| holiday större helg                         | 1 ingen större helg                     |           |
|                                             | 2 större helg (påsk/midsommar/julonyår) |           |

## Categorical Variables Codings

|                                             |                                         | Parameter |
|---------------------------------------------|-----------------------------------------|-----------|
|                                             |                                         | (10)      |
|                                             | 502300005                               | ,000      |
|                                             | 502300006                               | ,000      |
|                                             | 502300007                               | ,000      |
|                                             | 502300214                               | ,000      |
|                                             | 502300411                               | ,000      |
|                                             | 502300415                               | ,000      |
|                                             | 502300416                               | ,000      |
|                                             | 502300811                               | ,000      |
|                                             | 502300913                               | ,000      |
| weekday veckodag                            | 1 måndag                                |           |
|                                             | 2 tisdag                                |           |
|                                             | 3 onsdag                                |           |
|                                             | 4 torsdag                               |           |
|                                             | 5 fredag                                |           |
|                                             | 6 lördag                                |           |
|                                             | 7 söndag                                |           |
| season säsong/period                        | 1 januari-mars                          |           |
|                                             | 2 april-maj                             |           |
|                                             | 3 juni-augusti                          |           |
|                                             | 4 september-oktober                     |           |
|                                             | 5 november-december                     |           |
| bv2 belastning vs paoncil halva intervallet | 1 medelbelastning                       |           |
|                                             | 2 underbelastning                       |           |
|                                             | 3 överbelastning                        |           |
| holiday större helg                         | 1 ingen större helg                     |           |
|                                             | 2 större helg (påsk/midsommar/julonyår) |           |

## Categorical Variables Codings

|                                             |                                         | Parameter |
|---------------------------------------------|-----------------------------------------|-----------|
|                                             |                                         | (1)       |
|                                             | 502300005                               | ,000      |
|                                             | 502300006                               | ,000      |
|                                             | 502300007                               | ,000      |
|                                             | 502300214                               | ,000      |
|                                             | 502300411                               | ,000      |
|                                             | 502300415                               | ,000      |
|                                             | 502300416                               | ,000      |
|                                             | 502300811                               | ,000      |
|                                             | 502300913                               | ,000      |
| weekday veckodag                            | 1 måndag                                |           |
|                                             | 2 tisdag                                |           |
|                                             | 3 onsdag                                |           |
|                                             | 4 torsdag                               |           |
|                                             | 5 fredag                                |           |
|                                             | 6 lördag                                |           |
|                                             | 7 söndag                                |           |
| season säsong/period                        | 1 januari-mars                          |           |
|                                             | 2 april-maj                             |           |
|                                             | 3 juni-augusti                          |           |
|                                             | 4 september-oktober                     |           |
|                                             | 5 november-december                     |           |
| bv2 belastning vs paoncil halva intervallet | 1 medelbelastning                       |           |
|                                             | 2 underbelastning                       |           |
|                                             | 3 överbelastning                        |           |
| holiday större helg                         | 1 ingen större helg                     |           |
|                                             | 2 större helg (påsk/midsommar/julonyår) |           |

## Categorical Variables Codings

|                                             |                                         | Parameter |
|---------------------------------------------|-----------------------------------------|-----------|
|                                             |                                         | (12)      |
|                                             | 502300005                               | ,000      |
|                                             | 502300006                               | ,000      |
|                                             | 502300007                               | ,000      |
|                                             | 502300214                               | ,000      |
|                                             | 502300411                               | ,000      |
|                                             | 502300415                               | ,000      |
|                                             | 502300416                               | ,000      |
|                                             | 502300811                               | ,000      |
|                                             | 502300913                               | ,000      |
| weekday veckodag                            | 1 måndag                                |           |
|                                             | 2 tisdag                                |           |
|                                             | 3 onsdag                                |           |
|                                             | 4 torsdag                               |           |
|                                             | 5 fredag                                |           |
|                                             | 6 lördag                                |           |
|                                             | 7 söndag                                |           |
| season säsong/period                        | 1 januari-mars                          |           |
|                                             | 2 april-maj                             |           |
|                                             | 3 juni-augusti                          |           |
|                                             | 4 september-oktober                     |           |
|                                             | 5 november-december                     |           |
| bv2 belastning vs paoncil halva intervallet | 1 medelbelastning                       |           |
|                                             | 2 underbelastning                       |           |
|                                             | 3 överbelastning                        |           |
| holiday större helg                         | 1 ingen större helg                     |           |
|                                             | 2 större helg (påsk/midsommar/julonyår) |           |



## Categorical Variables Codings

|                                             |                                         | Parameter |
|---------------------------------------------|-----------------------------------------|-----------|
|                                             |                                         | (13)      |
|                                             | 502300005                               | ,000      |
|                                             | 502300006                               | ,000      |
|                                             | 502300007                               | ,000      |
|                                             | 502300214                               | ,000      |
|                                             | 502300411                               | ,000      |
|                                             | 502300415                               | ,000      |
|                                             | 502300416                               | ,000      |
|                                             | 502300811                               | ,000      |
|                                             | 502300913                               | ,000      |
| weekday veckodag                            | 1 måndag                                |           |
|                                             | 2 tisdag                                |           |
|                                             | 3 onsdag                                |           |
|                                             | 4 torsdag                               |           |
|                                             | 5 fredag                                |           |
|                                             | 6 lördag                                |           |
|                                             | 7 söndag                                |           |
| season säsong/period                        | 1 januari-mars                          |           |
|                                             | 2 april-maj                             |           |
|                                             | 3 juni-augusti                          |           |
|                                             | 4 september-oktober                     |           |
|                                             | 5 november-december                     |           |
| bv2 belastning vs paoncil halva intervallet | 1 medelbelastning                       |           |
|                                             | 2 underbelastning                       |           |
|                                             | 3 överbelastning                        |           |
| holiday större helg                         | 1 ingen större helg                     |           |
|                                             | 2 större helg (påsk/midsommar/julonyår) |           |

## Categorical Variables Codings

|                                             |                                         | Parameter |
|---------------------------------------------|-----------------------------------------|-----------|
|                                             |                                         | (14)      |
|                                             | 502300005                               | ,000      |
|                                             | 502300006                               | ,000      |
|                                             | 502300007                               | ,000      |
|                                             | 502300214                               | ,000      |
|                                             | 502300411                               | ,000      |
|                                             | 502300415                               | ,000      |
|                                             | 502300416                               | ,000      |
|                                             | 502300811                               | ,000      |
|                                             | 502300913                               | ,000      |
| weekday veckodag                            | 1 måndag                                |           |
|                                             | 2 tisdag                                |           |
|                                             | 3 onsdag                                |           |
|                                             | 4 torsdag                               |           |
|                                             | 5 fredag                                |           |
|                                             | 6 lördag                                |           |
|                                             | 7 söndag                                |           |
| season säsong/period                        | 1 januari-mars                          |           |
|                                             | 2 april-maj                             |           |
|                                             | 3 juni-augusti                          |           |
|                                             | 4 september-oktober                     |           |
|                                             | 5 november-december                     |           |
| bv2 belastning vs paoncil halva intervallet | 1 medelbelastning                       |           |
|                                             | 2 underbelastning                       |           |
|                                             | 3 överbelastning                        |           |
| holiday större helg                         | 1 ingen större helg                     |           |
|                                             | 2 större helg (påsk/midsommar/julonyår) |           |

## Categorical Variables Codings

|                                             |                                         | Parameter |
|---------------------------------------------|-----------------------------------------|-----------|
|                                             |                                         | (15)      |
|                                             | 502300005                               | ,000      |
|                                             | 502300006                               | ,000      |
|                                             | 502300007                               | ,000      |
|                                             | 502300214                               | ,000      |
|                                             | 502300411                               | ,000      |
|                                             | 502300415                               | ,000      |
|                                             | 502300416                               | ,000      |
|                                             | 502300811                               | ,000      |
|                                             | 502300913                               | ,000      |
| weekday veckodag                            | 1 måndag                                |           |
|                                             | 2 tisdag                                |           |
|                                             | 3 onsdag                                |           |
|                                             | 4 torsdag                               |           |
|                                             | 5 fredag                                |           |
|                                             | 6 lördag                                |           |
|                                             | 7 söndag                                |           |
| season säsong/period                        | 1 januari-mars                          |           |
|                                             | 2 april-maj                             |           |
|                                             | 3 juni-augusti                          |           |
|                                             | 4 september-oktober                     |           |
|                                             | 5 november-december                     |           |
| bv2 belastning vs paoncil halva intervallet | 1 medelbelastning                       |           |
|                                             | 2 underbelastning                       |           |
|                                             | 3 överbelastning                        |           |
| holiday större helg                         | 1 ingen större helg                     |           |
|                                             | 2 större helg (påsk/midsommar/julonyår) |           |

## Categorical Variables Codings

|                                             |                                         | Parameter |
|---------------------------------------------|-----------------------------------------|-----------|
|                                             |                                         | (16)      |
|                                             | 502300005                               | ,000      |
|                                             | 502300006                               | ,000      |
|                                             | 502300007                               | ,000      |
|                                             | 502300214                               | ,000      |
|                                             | 502300411                               | ,000      |
|                                             | 502300415                               | ,000      |
|                                             | 502300416                               | ,000      |
|                                             | 502300811                               | ,000      |
|                                             | 502300913                               | ,000      |
| weekday veckodag                            | 1 måndag                                |           |
|                                             | 2 tisdag                                |           |
|                                             | 3 onsdag                                |           |
|                                             | 4 torsdag                               |           |
|                                             | 5 fredag                                |           |
|                                             | 6 lördag                                |           |
|                                             | 7 söndag                                |           |
| season säsong/period                        | 1 januari-mars                          |           |
|                                             | 2 april-maj                             |           |
|                                             | 3 juni-augusti                          |           |
|                                             | 4 september-oktober                     |           |
|                                             | 5 november-december                     |           |
| bv2 belastning vs paoncil halva intervallet | 1 medelbelastning                       |           |
|                                             | 2 underbelastning                       |           |
|                                             | 3 överbelastning                        |           |
| holiday större helg                         | 1 ingen större helg                     |           |
|                                             | 2 större helg (påsk/midsommar/julonyår) |           |

## Categorical Variables Codings

|                                             |                                         | Parameter |
|---------------------------------------------|-----------------------------------------|-----------|
|                                             |                                         | (17)      |
|                                             | 502300005                               | ,000      |
|                                             | 502300006                               | ,000      |
|                                             | 502300007                               | ,000      |
|                                             | 502300214                               | ,000      |
|                                             | 502300411                               | ,000      |
|                                             | 502300415                               | ,000      |
|                                             | 502300416                               | ,000      |
|                                             | 502300811                               | ,000      |
|                                             | 502300913                               | ,000      |
| weekday veckodag                            | 1 måndag                                |           |
|                                             | 2 tisdag                                |           |
|                                             | 3 onsdag                                |           |
|                                             | 4 torsdag                               |           |
|                                             | 5 fredag                                |           |
|                                             | 6 lördag                                |           |
|                                             | 7 söndag                                |           |
| season säsong/period                        | 1 januari-mars                          |           |
|                                             | 2 april-maj                             |           |
|                                             | 3 juni-augusti                          |           |
|                                             | 4 september-oktober                     |           |
|                                             | 5 november-december                     |           |
| bv2 belastning vs paoncil halva intervallet | 1 medelbelastning                       |           |
|                                             | 2 underbelastning                       |           |
|                                             | 3 överbelastning                        |           |
| holiday större helg                         | 1 ingen större helg                     |           |
|                                             | 2 större helg (påsk/midsommar/julonyår) |           |

## Categorical Variables Codings

|                                             |                                         | Parameter |
|---------------------------------------------|-----------------------------------------|-----------|
|                                             |                                         | (18)      |
|                                             | 502300005                               | ,000      |
|                                             | 502300006                               | ,000      |
|                                             | 502300007                               | ,000      |
|                                             | 502300214                               | ,000      |
|                                             | 502300411                               | ,000      |
|                                             | 502300415                               | ,000      |
|                                             | 502300416                               | ,000      |
|                                             | 502300811                               | ,000      |
|                                             | 502300913                               | ,000      |
| weekday veckodag                            | 1 måndag                                |           |
|                                             | 2 tisdag                                |           |
|                                             | 3 onsdag                                |           |
|                                             | 4 torsdag                               |           |
|                                             | 5 fredag                                |           |
|                                             | 6 lördag                                |           |
|                                             | 7 söndag                                |           |
| season säsong/period                        | 1 januari-mars                          |           |
|                                             | 2 april-maj                             |           |
|                                             | 3 juni-augusti                          |           |
|                                             | 4 september-oktober                     |           |
|                                             | 5 november-december                     |           |
| bv2 belastning vs paoncil halva intervallet | 1 medelbelastning                       |           |
|                                             | 2 underbelastning                       |           |
|                                             | 3 överbelastning                        |           |
| holiday större helg                         | 1 ingen större helg                     |           |
|                                             | 2 större helg (påsk/midsommar/julonyår) |           |

## Categorical Variables Codings

|                                             |                                         | Parameter |
|---------------------------------------------|-----------------------------------------|-----------|
|                                             |                                         | (19)      |
|                                             | 502300005                               | ,000      |
|                                             | 502300006                               | ,000      |
|                                             | 502300007                               | ,000      |
|                                             | 502300214                               | ,000      |
|                                             | 502300411                               | ,000      |
|                                             | 502300415                               | ,000      |
|                                             | 502300416                               | ,000      |
|                                             | 502300811                               | ,000      |
|                                             | 502300913                               | ,000      |
| weekday veckodag                            | 1 måndag                                |           |
|                                             | 2 tisdag                                |           |
|                                             | 3 onsdag                                |           |
|                                             | 4 torsdag                               |           |
|                                             | 5 fredag                                |           |
|                                             | 6 lördag                                |           |
|                                             | 7 söndag                                |           |
| season säsong/period                        | 1 januari-mars                          |           |
|                                             | 2 april-maj                             |           |
|                                             | 3 juni-augusti                          |           |
|                                             | 4 september-oktober                     |           |
|                                             | 5 november-december                     |           |
| bv2 belastning vs paoncil halva intervallet | 1 medelbelastning                       |           |
|                                             | 2 underbelastning                       |           |
|                                             | 3 överbelastning                        |           |
| holiday större helg                         | 1 ingen större helg                     |           |
|                                             | 2 större helg (påsk/midsommar/julonyår) |           |

## Categorical Variables Codings

|                                             |                                         | Parameter |
|---------------------------------------------|-----------------------------------------|-----------|
|                                             |                                         | (20)      |
|                                             | 502300005                               | ,000      |
|                                             | 502300006                               | ,000      |
|                                             | 502300007                               | ,000      |
|                                             | 502300214                               | ,000      |
|                                             | 502300411                               | ,000      |
|                                             | 502300415                               | ,000      |
|                                             | 502300416                               | ,000      |
|                                             | 502300811                               | ,000      |
|                                             | 502300913                               | ,000      |
| weekday veckodag                            | 1 måndag                                |           |
|                                             | 2 tisdag                                |           |
|                                             | 3 onsdag                                |           |
|                                             | 4 torsdag                               |           |
|                                             | 5 fredag                                |           |
|                                             | 6 lördag                                |           |
|                                             | 7 söndag                                |           |
| season säsong/period                        | 1 januari-mars                          |           |
|                                             | 2 april-maj                             |           |
|                                             | 3 juni-augusti                          |           |
|                                             | 4 september-oktober                     |           |
|                                             | 5 november-december                     |           |
| bv2 belastning vs paoncil halva intervallet | 1 medelbelastning                       |           |
|                                             | 2 underbelastning                       |           |
|                                             | 3 överbelastning                        |           |
| holiday större helg                         | 1 ingen större helg                     |           |
|                                             | 2 större helg (påsk/midsommar/julonyår) |           |



## Categorical Variables Codings

|                                             |                                         | Parameter |
|---------------------------------------------|-----------------------------------------|-----------|
|                                             |                                         | (21)      |
|                                             | 502300005                               | ,000      |
|                                             | 502300006                               | ,000      |
|                                             | 502300007                               | ,000      |
|                                             | 502300214                               | ,000      |
|                                             | 502300411                               | ,000      |
|                                             | 502300415                               | ,000      |
|                                             | 502300416                               | ,000      |
|                                             | 502300811                               | ,000      |
|                                             | 502300913                               | ,000      |
| weekday veckodag                            | 1 måndag                                |           |
|                                             | 2 tisdag                                |           |
|                                             | 3 onsdag                                |           |
|                                             | 4 torsdag                               |           |
|                                             | 5 fredag                                |           |
|                                             | 6 lördag                                |           |
|                                             | 7 söndag                                |           |
| season säsong/period                        | 1 januari-mars                          |           |
|                                             | 2 april-maj                             |           |
|                                             | 3 juni-augusti                          |           |
|                                             | 4 september-oktober                     |           |
|                                             | 5 november-december                     |           |
| bv2 belastning vs paoncil halva intervallet | 1 medelbelastning                       |           |
|                                             | 2 underbelastning                       |           |
|                                             | 3 överbelastning                        |           |
| holiday större helg                         | 1 ingen större helg                     |           |
|                                             | 2 större helg (påsk/midsommar/julonyår) |           |

## Categorical Variables Codings

|                                             |                                         | Parameter |
|---------------------------------------------|-----------------------------------------|-----------|
|                                             |                                         | (22)      |
|                                             | 502300005                               | ,000      |
|                                             | 502300006                               | ,000      |
|                                             | 502300007                               | ,000      |
|                                             | 502300214                               | ,000      |
|                                             | 502300411                               | ,000      |
|                                             | 502300415                               | ,000      |
|                                             | 502300416                               | ,000      |
|                                             | 502300811                               | ,000      |
|                                             | 502300913                               | ,000      |
| weekday veckodag                            | 1 måndag                                |           |
|                                             | 2 tisdag                                |           |
|                                             | 3 onsdag                                |           |
|                                             | 4 torsdag                               |           |
|                                             | 5 fredag                                |           |
|                                             | 6 lördag                                |           |
|                                             | 7 söndag                                |           |
| season säsong/period                        | 1 januari-mars                          |           |
|                                             | 2 april-maj                             |           |
|                                             | 3 juni-augusti                          |           |
|                                             | 4 september-oktober                     |           |
|                                             | 5 november-december                     |           |
| bv2 belastning vs paoncil halva intervallet | 1 medelbelastning                       |           |
|                                             | 2 underbelastning                       |           |
|                                             | 3 överbelastning                        |           |
| holiday större helg                         | 1 ingen större helg                     |           |
|                                             | 2 större helg (påsk/midsommar/julonyår) |           |

## Categorical Variables Codings

|                                             |                                         | Parameter |
|---------------------------------------------|-----------------------------------------|-----------|
|                                             |                                         | (23)      |
|                                             | 502300005                               | ,000      |
|                                             | 502300006                               | ,000      |
|                                             | 502300007                               | ,000      |
|                                             | 502300214                               | ,000      |
|                                             | 502300411                               | ,000      |
|                                             | 502300415                               | ,000      |
|                                             | 502300416                               | ,000      |
|                                             | 502300811                               | ,000      |
|                                             | 502300913                               | ,000      |
| weekday veckodag                            | 1 måndag                                |           |
|                                             | 2 tisdag                                |           |
|                                             | 3 onsdag                                |           |
|                                             | 4 torsdag                               |           |
|                                             | 5 fredag                                |           |
|                                             | 6 lördag                                |           |
|                                             | 7 söndag                                |           |
| season säsong/period                        | 1 januari-mars                          |           |
|                                             | 2 april-maj                             |           |
|                                             | 3 juni-augusti                          |           |
|                                             | 4 september-oktober                     |           |
|                                             | 5 november-december                     |           |
| bv2 belastning vs paoncil halva intervallet | 1 medelbelastning                       |           |
|                                             | 2 underbelastning                       |           |
|                                             | 3 överbelastning                        |           |
| holiday större helg                         | 1 ingen större helg                     |           |
|                                             | 2 större helg (påsk/midsommar/julonyår) |           |

## Categorical Variables Codings

|                                             |                                         | Parameter |
|---------------------------------------------|-----------------------------------------|-----------|
|                                             |                                         | (24)      |
|                                             | 502300005                               | ,000      |
|                                             | 502300006                               | ,000      |
|                                             | 502300007                               | ,000      |
|                                             | 502300214                               | ,000      |
|                                             | 502300411                               | ,000      |
|                                             | 502300415                               | ,000      |
|                                             | 502300416                               | ,000      |
|                                             | 502300811                               | ,000      |
|                                             | 502300913                               | ,000      |
| weekday veckodag                            | 1 måndag                                |           |
|                                             | 2 tisdag                                |           |
|                                             | 3 onsdag                                |           |
|                                             | 4 torsdag                               |           |
|                                             | 5 fredag                                |           |
|                                             | 6 lördag                                |           |
|                                             | 7 söndag                                |           |
| season säsong/period                        | 1 januari-mars                          |           |
|                                             | 2 april-maj                             |           |
|                                             | 3 juni-augusti                          |           |
|                                             | 4 september-oktober                     |           |
|                                             | 5 november-december                     |           |
| bv2 belastning vs paoncil halva intervallet | 1 medelbelastning                       |           |
|                                             | 2 underbelastning                       |           |
|                                             | 3 överbelastning                        |           |
| holiday större helg                         | 1 ingen större helg                     |           |
|                                             | 2 större helg (påsk/midsommar/julonyår) |           |

## Categorical Variables Codings

|                                             |                                         | Parameter |
|---------------------------------------------|-----------------------------------------|-----------|
|                                             |                                         | (25)      |
|                                             | 502300005                               | ,000      |
|                                             | 502300006                               | ,000      |
|                                             | 502300007                               | ,000      |
|                                             | 502300214                               | ,000      |
|                                             | 502300411                               | ,000      |
|                                             | 502300415                               | ,000      |
|                                             | 502300416                               | ,000      |
|                                             | 502300811                               | ,000      |
|                                             | 502300913                               | ,000      |
| weekday veckodag                            | 1 måndag                                |           |
|                                             | 2 tisdag                                |           |
|                                             | 3 onsdag                                |           |
|                                             | 4 torsdag                               |           |
|                                             | 5 fredag                                |           |
|                                             | 6 lördag                                |           |
|                                             | 7 söndag                                |           |
| season säsong/period                        | 1 januari-mars                          |           |
|                                             | 2 april-maj                             |           |
|                                             | 3 juni-augusti                          |           |
|                                             | 4 september-oktober                     |           |
|                                             | 5 november-december                     |           |
| bv2 belastning vs paoncil halva intervallet | 1 medelbelastning                       |           |
|                                             | 2 underbelastning                       |           |
|                                             | 3 överbelastning                        |           |
| holiday större helg                         | 1 ingen större helg                     |           |
|                                             | 2 större helg (påsk/midsommar/julonyår) |           |

## Categorical Variables Codings

|                                             |                                         | Parameter |
|---------------------------------------------|-----------------------------------------|-----------|
|                                             |                                         | (26)      |
|                                             | 502300005                               | ,000      |
|                                             | 502300006                               | ,000      |
|                                             | 502300007                               | ,000      |
|                                             | 502300214                               | ,000      |
|                                             | 502300411                               | ,000      |
|                                             | 502300415                               | ,000      |
|                                             | 502300416                               | ,000      |
|                                             | 502300811                               | ,000      |
|                                             | 502300913                               | ,000      |
| weekday veckodag                            | 1 måndag                                |           |
|                                             | 2 tisdag                                |           |
|                                             | 3 onsdag                                |           |
|                                             | 4 torsdag                               |           |
|                                             | 5 fredag                                |           |
|                                             | 6 lördag                                |           |
|                                             | 7 söndag                                |           |
| season säsong/period                        | 1 januari-mars                          |           |
|                                             | 2 april-maj                             |           |
|                                             | 3 juni-augusti                          |           |
|                                             | 4 september-oktober                     |           |
|                                             | 5 november-december                     |           |
| bv2 belastning vs paoncil halva intervallet | 1 medelbelastning                       |           |
|                                             | 2 underbelastning                       |           |
|                                             | 3 överbelastning                        |           |
| holiday större helg                         | 1 ingen större helg                     |           |
|                                             | 2 större helg (påsk/midsommar/julonyår) |           |

## Categorical Variables Codings

|                                             |                                         | Parameter |
|---------------------------------------------|-----------------------------------------|-----------|
|                                             |                                         | (27)      |
|                                             | 502300005                               | 1,000     |
|                                             | 502300006                               | ,000      |
|                                             | 502300007                               | ,000      |
|                                             | 502300214                               | ,000      |
|                                             | 502300411                               | ,000      |
|                                             | 502300415                               | ,000      |
|                                             | 502300416                               | ,000      |
|                                             | 502300811                               | ,000      |
|                                             | 502300913                               | ,000      |
| weekday veckodag                            | 1 måndag                                |           |
|                                             | 2 tisdag                                |           |
|                                             | 3 onsdag                                |           |
|                                             | 4 torsdag                               |           |
|                                             | 5 fredag                                |           |
|                                             | 6 lördag                                |           |
|                                             | 7 söndag                                |           |
| season säsong/period                        | 1 januari-mars                          |           |
|                                             | 2 april-maj                             |           |
|                                             | 3 juni-augusti                          |           |
|                                             | 4 september-oktober                     |           |
|                                             | 5 november-december                     |           |
| bv2 belastning vs paoncil halva intervallet | 1 medelbelastning                       |           |
|                                             | 2 underbelastning                       |           |
|                                             | 3 överbelastning                        |           |
| holiday större helg                         | 1 ingen större helg                     |           |
|                                             | 2 större helg (påsk/midsommar/julonyår) |           |

## Categorical Variables Codings

|                                             |                                         | Parameter |
|---------------------------------------------|-----------------------------------------|-----------|
|                                             |                                         | (28)      |
|                                             | 502300005                               | ,000      |
|                                             | 502300006                               | 1,000     |
|                                             | 502300007                               | ,000      |
|                                             | 502300214                               | ,000      |
|                                             | 502300411                               | ,000      |
|                                             | 502300415                               | ,000      |
|                                             | 502300416                               | ,000      |
|                                             | 502300811                               | ,000      |
|                                             | 502300913                               | ,000      |
| weekday veckodag                            | 1 måndag                                |           |
|                                             | 2 tisdag                                |           |
|                                             | 3 onsdag                                |           |
|                                             | 4 torsdag                               |           |
|                                             | 5 fredag                                |           |
|                                             | 6 lördag                                |           |
|                                             | 7 söndag                                |           |
| season säsong/period                        | 1 januari-mars                          |           |
|                                             | 2 april-maj                             |           |
|                                             | 3 juni-augusti                          |           |
|                                             | 4 september-oktober                     |           |
|                                             | 5 november-december                     |           |
| bv2 belastning vs paoncil halva intervallet | 1 medelbelastning                       |           |
|                                             | 2 underbelastning                       |           |
|                                             | 3 överbelastning                        |           |
| holiday större helg                         | 1 ingen större helg                     |           |
|                                             | 2 större helg (påsk/midsommar/julonyår) |           |



## Categorical Variables Codings

|                                             |                                         | Parameter |
|---------------------------------------------|-----------------------------------------|-----------|
|                                             |                                         | (29)      |
|                                             | 502300005                               | ,000      |
|                                             | 502300006                               | ,000      |
|                                             | 502300007                               | 1,000     |
|                                             | 502300214                               | ,000      |
|                                             | 502300411                               | ,000      |
|                                             | 502300415                               | ,000      |
|                                             | 502300416                               | ,000      |
|                                             | 502300811                               | ,000      |
|                                             | 502300913                               | ,000      |
| weekday veckodag                            | 1 måndag                                |           |
|                                             | 2 tisdag                                |           |
|                                             | 3 onsdag                                |           |
|                                             | 4 torsdag                               |           |
|                                             | 5 fredag                                |           |
|                                             | 6 lördag                                |           |
|                                             | 7 söndag                                |           |
| season säsong/period                        | 1 januari-mars                          |           |
|                                             | 2 april-maj                             |           |
|                                             | 3 juni-augusti                          |           |
|                                             | 4 september-oktober                     |           |
|                                             | 5 november-december                     |           |
| bv2 belastning vs paoncil halva intervallet | 1 medelbelastning                       |           |
|                                             | 2 underbelastning                       |           |
|                                             | 3 överbelastning                        |           |
| holiday större helg                         | 1 ingen större helg                     |           |
|                                             | 2 större helg (påsk/midsommar/julonyår) |           |

## Categorical Variables Codings

|                                             |                                         | Parameter |
|---------------------------------------------|-----------------------------------------|-----------|
|                                             |                                         | (30)      |
|                                             | 502300005                               | ,000      |
|                                             | 502300006                               | ,000      |
|                                             | 502300007                               | ,000      |
|                                             | 502300214                               | 1,000     |
|                                             | 502300411                               | ,000      |
|                                             | 502300415                               | ,000      |
|                                             | 502300416                               | ,000      |
|                                             | 502300811                               | ,000      |
|                                             | 502300913                               | ,000      |
| weekday veckodag                            | 1 måndag                                |           |
|                                             | 2 tisdag                                |           |
|                                             | 3 onsdag                                |           |
|                                             | 4 torsdag                               |           |
|                                             | 5 fredag                                |           |
|                                             | 6 lördag                                |           |
|                                             | 7 söndag                                |           |
| season säsong/period                        | 1 januari-mars                          |           |
|                                             | 2 april-maj                             |           |
|                                             | 3 juni-augusti                          |           |
|                                             | 4 september-oktober                     |           |
|                                             | 5 november-december                     |           |
| bv2 belastning vs paoncil halva intervallet | 1 medelbelastning                       |           |
|                                             | 2 underbelastning                       |           |
|                                             | 3 överbelastning                        |           |
| holiday större helg                         | 1 ingen större helg                     |           |
|                                             | 2 större helg (påsk/midsommar/julonyår) |           |

## Categorical Variables Codings

|                                             |                                         | Parameter |
|---------------------------------------------|-----------------------------------------|-----------|
|                                             |                                         | (31)      |
|                                             | 502300005                               | ,000      |
|                                             | 502300006                               | ,000      |
|                                             | 502300007                               | ,000      |
|                                             | 502300214                               | ,000      |
|                                             | 502300411                               | 1,000     |
|                                             | 502300415                               | ,000      |
|                                             | 502300416                               | ,000      |
|                                             | 502300811                               | ,000      |
|                                             | 502300913                               | ,000      |
| weekday veckodag                            | 1 måndag                                |           |
|                                             | 2 tisdag                                |           |
|                                             | 3 onsdag                                |           |
|                                             | 4 torsdag                               |           |
|                                             | 5 fredag                                |           |
|                                             | 6 lördag                                |           |
|                                             | 7 söndag                                |           |
| season säsong/period                        | 1 januari-mars                          |           |
|                                             | 2 april-maj                             |           |
|                                             | 3 juni-augusti                          |           |
|                                             | 4 september-oktober                     |           |
|                                             | 5 november-december                     |           |
| bv2 belastning vs paoncil halva intervallet | 1 medelbelastning                       |           |
|                                             | 2 underbelastning                       |           |
|                                             | 3 överbelastning                        |           |
| holiday större helg                         | 1 ingen större helg                     |           |
|                                             | 2 större helg (påsk/midsommar/julonyår) |           |

## Categorical Variables Codings

|                                             |                                         | Parameter |
|---------------------------------------------|-----------------------------------------|-----------|
|                                             |                                         | (32)      |
|                                             | 502300005                               | ,000      |
|                                             | 502300006                               | ,000      |
|                                             | 502300007                               | ,000      |
|                                             | 502300214                               | ,000      |
|                                             | 502300411                               | ,000      |
|                                             | 502300415                               | 1,000     |
|                                             | 502300416                               | ,000      |
|                                             | 502300811                               | ,000      |
|                                             | 502300913                               | ,000      |
| weekday veckodag                            | 1 måndag                                |           |
|                                             | 2 tisdag                                |           |
|                                             | 3 onsdag                                |           |
|                                             | 4 torsdag                               |           |
|                                             | 5 fredag                                |           |
|                                             | 6 lördag                                |           |
|                                             | 7 söndag                                |           |
| season säsong/period                        | 1 januari-mars                          |           |
|                                             | 2 april-maj                             |           |
|                                             | 3 juni-augusti                          |           |
|                                             | 4 september-oktober                     |           |
|                                             | 5 november-december                     |           |
| bv2 belastning vs paoncil halva intervallet | 1 medelbelastning                       |           |
|                                             | 2 underbelastning                       |           |
|                                             | 3 överbelastning                        |           |
| holiday större helg                         | 1 ingen större helg                     |           |
|                                             | 2 större helg (påsk/midsommar/julonyår) |           |

## Categorical Variables Codings

|                                             |                                         | Parameter |
|---------------------------------------------|-----------------------------------------|-----------|
|                                             |                                         | (33)      |
|                                             | 502300005                               | ,000      |
|                                             | 502300006                               | ,000      |
|                                             | 502300007                               | ,000      |
|                                             | 502300214                               | ,000      |
|                                             | 502300411                               | ,000      |
|                                             | 502300415                               | ,000      |
|                                             | 502300416                               | 1,000     |
|                                             | 502300811                               | ,000      |
|                                             | 502300913                               | ,000      |
| weekday veckodag                            | 1 måndag                                |           |
|                                             | 2 tisdag                                |           |
|                                             | 3 onsdag                                |           |
|                                             | 4 torsdag                               |           |
|                                             | 5 fredag                                |           |
|                                             | 6 lördag                                |           |
|                                             | 7 söndag                                |           |
| season säsong/period                        | 1 januari-mars                          |           |
|                                             | 2 april-maj                             |           |
|                                             | 3 juni-augusti                          |           |
|                                             | 4 september-oktober                     |           |
|                                             | 5 november-december                     |           |
| bv2 belastning vs paoncil halva intervallet | 1 medelbelastning                       |           |
|                                             | 2 underbelastning                       |           |
|                                             | 3 överbelastning                        |           |
| holiday större helg                         | 1 ingen större helg                     |           |
|                                             | 2 större helg (påsk/midsommar/julonyår) |           |

## Categorical Variables Codings

|                                             |                                         | Parameter |
|---------------------------------------------|-----------------------------------------|-----------|
|                                             |                                         | (34)      |
|                                             | 502300005                               | ,000      |
|                                             | 502300006                               | ,000      |
|                                             | 502300007                               | ,000      |
|                                             | 502300214                               | ,000      |
|                                             | 502300411                               | ,000      |
|                                             | 502300415                               | ,000      |
|                                             | 502300416                               | ,000      |
|                                             | 502300811                               | 1,000     |
|                                             | 502300913                               | ,000      |
| weekday veckodag                            | 1 måndag                                |           |
|                                             | 2 tisdag                                |           |
|                                             | 3 onsdag                                |           |
|                                             | 4 torsdag                               |           |
|                                             | 5 fredag                                |           |
|                                             | 6 lördag                                |           |
|                                             | 7 söndag                                |           |
| season säsong/period                        | 1 januari-mars                          |           |
|                                             | 2 april-maj                             |           |
|                                             | 3 juni-augusti                          |           |
|                                             | 4 september-oktober                     |           |
|                                             | 5 november-december                     |           |
| bv2 belastning vs paoncil halva intervallet | 1 medelbelastning                       |           |
|                                             | 2 underbelastning                       |           |
|                                             | 3 överbelastning                        |           |
| holiday större helg                         | 1 ingen större helg                     |           |
|                                             | 2 större helg (påsk/midsommar/julonyår) |           |

**Categorical Variables Codings**

|                                             |                                         | Paramete... |
|---------------------------------------------|-----------------------------------------|-------------|
|                                             |                                         | (35)        |
|                                             | 502300005                               | ,000        |
|                                             | 502300006                               | ,000        |
|                                             | 502300007                               | ,000        |
|                                             | 502300214                               | ,000        |
|                                             | 502300411                               | ,000        |
|                                             | 502300415                               | ,000        |
|                                             | 502300416                               | ,000        |
|                                             | 502300811                               | ,000        |
|                                             | 502300913                               | 1,000       |
| weekday veckodag                            | 1 måndag                                |             |
|                                             | 2 tisdag                                |             |
|                                             | 3 onsdag                                |             |
|                                             | 4 torsdag                               |             |
|                                             | 5 fredag                                |             |
|                                             | 6 lördag                                |             |
|                                             | 7 söndag                                |             |
| season säsong/period                        | 1 januari-mars                          |             |
|                                             | 2 april-maj                             |             |
|                                             | 3 juni-augusti                          |             |
|                                             | 4 september-oktober                     |             |
|                                             | 5 november-december                     |             |
| bv2 belastning vs paoncil halva intervallet | 1 medelbelastning                       |             |
|                                             | 2 underbelastning                       |             |
|                                             | 3 överbelastning                        |             |
| holiday större helg                         | 1 ingen större helg                     |             |
|                                             | 2 större helg (påsk/midsommar/julonyår) |             |

**Block 0: Beginning Block**

**Classification Table<sup>a,b</sup>**

|                    |                                                |                                                              |
|--------------------|------------------------------------------------|--------------------------------------------------------------|
| Observed           |                                                |                                                              |
| Step 0             | luonnelt1 luonne highest = tapahtui potilaalle | 0 ingen händelse eller läheltä piti<br>1 tapahtui potilaalle |
| Overall Percentage |                                                |                                                              |

Classification Table<sup>a,b</sup>

| Observed           |                                                |                                     | Predicted                      |                                     |
|--------------------|------------------------------------------------|-------------------------------------|--------------------------------|-------------------------------------|
|                    |                                                |                                     | luonnelt1 luonne highest = ... | 0 ingen händelse eller läheltä piti |
| Step 0             | luonnelt1 luonne highest = tapahtui potilaalle | 0 ingen händelse eller läheltä piti | 11627                          |                                     |
|                    |                                                | 1 tapahtui potilaalle               | 848                            |                                     |
| Overall Percentage |                                                |                                     |                                |                                     |

Classification Table<sup>a,b</sup>

| Observed           |                                                |                                     | Predicted                    |                       |
|--------------------|------------------------------------------------|-------------------------------------|------------------------------|-----------------------|
|                    |                                                |                                     | luonnelt1 luonne highest ... | 1 tapahtui potilaalle |
| Step 0             | luonnelt1 luonne highest = tapahtui potilaalle | 0 ingen händelse eller läheltä piti | 0                            |                       |
|                    |                                                | 1 tapahtui potilaalle               | 0                            |                       |
| Overall Percentage |                                                |                                     |                              |                       |

Classification Table<sup>a,b</sup>

| Observed           |                                                |                                     | Predicted          |  |
|--------------------|------------------------------------------------|-------------------------------------|--------------------|--|
|                    |                                                |                                     | Percentage Correct |  |
| Step 0             | luonnelt1 luonne highest = tapahtui potilaalle | 0 ingen händelse eller läheltä piti | 100,0              |  |
|                    |                                                | 1 tapahtui potilaalle               | ,0                 |  |
| Overall Percentage |                                                |                                     | 93,2               |  |

a. Constant is included in the model.

b. The cut value is ,500

Variables in the Equation

|                 | B      | S.E. | Wald     | df | Sig. | Exp(B) |
|-----------------|--------|------|----------|----|------|--------|
| Step 0 Constant | -2,618 | ,036 | 5417,889 | 1  | ,000 | ,073   |



## Variables not in the Equation

|        |           |            | Score   | df | Sig. |
|--------|-----------|------------|---------|----|------|
| Step 0 | Variables | bv2        | 20,768  | 2  | ,000 |
|        |           | bv2(1)     | 19,506  | 1  | ,000 |
|        |           | bv2(2)     | 13,438  | 1  | ,000 |
|        |           | VASTY2     | 299,491 | 35 | ,000 |
|        |           | VASTY2(1)  | ,007    | 1  | ,934 |
|        |           | VASTY2(2)  | 8,968   | 1  | ,003 |
|        |           | VASTY2(3)  | 15,764  | 1  | ,000 |
|        |           | VASTY2(4)  | ,453    | 1  | ,501 |
|        |           | VASTY2(5)  | ,965    | 1  | ,326 |
|        |           | VASTY2(6)  | 14,062  | 1  | ,000 |
|        |           | VASTY2(7)  | 12,067  | 1  | ,001 |
|        |           | VASTY2(8)  | 1,504   | 1  | ,220 |
|        |           | VASTY2(9)  | 1,612   | 1  | ,204 |
|        |           | VASTY2(10) | 55,161  | 1  | ,000 |
|        |           | VASTY2(11) | 11,675  | 1  | ,001 |
|        |           | VASTY2(12) | ,213    | 1  | ,644 |
|        |           | VASTY2(13) | 55,161  | 1  | ,000 |
|        |           | VASTY2(14) | 1,504   | 1  | ,220 |
|        |           | VASTY2(15) | 1,199   | 1  | ,273 |
|        |           | VASTY2(16) | 3,222   | 1  | ,073 |
|        |           | VASTY2(17) | 12,590  | 1  | ,000 |
|        |           | VASTY2(18) | 7,137   | 1  | ,008 |
|        |           | VASTY2(19) | 19,294  | 1  | ,000 |
|        |           | VASTY2(20) | ,030    | 1  | ,863 |
|        |           | VASTY2(21) | ,647    | 1  | ,421 |
|        |           | VASTY2(22) | ,782    | 1  | ,377 |
|        |           | VASTY2(23) | 1,199   | 1  | ,273 |
|        |           | VASTY2(24) | 2,253   | 1  | ,133 |
|        |           | VASTY2(25) | 1,513   | 1  | ,219 |
|        |           | VASTY2(26) | 7,708   | 1  | ,005 |
|        |           | VASTY2(27) | 15,836  | 1  | ,000 |
|        |           | VASTY2(28) | 6,172   | 1  | ,013 |
|        |           | VASTY2(29) | 11,203  | 1  | ,001 |
|        |           | VASTY2(30) | 1,058   | 1  | ,304 |
|        |           | VASTY2(31) | 6,527   | 1  | ,011 |
|        |           | VASTY2(32) | ,544    | 1  | ,461 |
|        |           | VASTY2(33) | ,126    | 1  | ,723 |
|        |           | VASTY2(34) | 14,062  | 1  | ,000 |
|        |           | VASTY2(35) | 15,901  | 1  | ,000 |
|        |           | weekday    | 14,938  | 6  | ,021 |
|        |           | weekday(1) | ,984    | 1  | ,321 |
|        |           | weekday(2) | ,599    | 1  | ,439 |
|        |           | weekday(3) | ,376    | 1  | ,540 |

## Variables not in the Equation

|                    | Score   | df | Sig. |
|--------------------|---------|----|------|
| weekday(4)         | 1,867   | 1  | ,172 |
| weekday(5)         | 3,400   | 1  | ,065 |
| weekday(6)         | 9,074   | 1  | ,003 |
| holiday(1)         | 3,316   | 1  | ,069 |
| season             | 5,196   | 4  | ,268 |
| season(1)          | ,388    | 1  | ,533 |
| season(2)          | 1,566   | 1  | ,211 |
| season(3)          | 2,964   | 1  | ,085 |
| season(4)          | ,650    | 1  | ,420 |
| Overall Statistics | 327,552 | 48 | ,000 |

## Block 1: Method = Enter

## Omnibus Tests of Model Coefficients

|             | Chi-square | df | Sig. |
|-------------|------------|----|------|
| Step 1 Step | 336,814    | 48 | ,000 |
| Block       | 336,814    | 48 | ,000 |
| Model       | 336,814    | 48 | ,000 |

## Model Summary

| Step | -2 Log likelihood     | Cox & Snell R Square | Nagelkerke R Square |
|------|-----------------------|----------------------|---------------------|
| 1    | 5860,057 <sup>a</sup> | ,027                 | ,068                |

a. Estimation terminated at iteration number 7 because parameter estimates changed by less than ,001.

Classification Table<sup>a</sup>

| Observed           |                                                |                                                              |
|--------------------|------------------------------------------------|--------------------------------------------------------------|
| Step 1             | luonnelt1 luonne highest = tapahtui potilaalle | 0 ingen händelse eller läheltä piti<br>1 tapahtui potilaalle |
| Overall Percentage |                                                |                                                              |

Classification Table<sup>a</sup>

| Observed           |                                                | Predicted                           |                                     |
|--------------------|------------------------------------------------|-------------------------------------|-------------------------------------|
|                    |                                                | luonnelt1 luonne highest = ...      | 0 ingen händelse eller läheltä piti |
| Step 1             | luonnelt1 luonne highest = tapahtui potilaalle | 0 ingen händelse eller läheltä piti | 11627                               |
|                    |                                                | 1 tapahtui potilaalle               | 848                                 |
| Overall Percentage |                                                |                                     |                                     |

Classification Table<sup>a</sup>

| Observed           |                                                | Predicted                           |                       |
|--------------------|------------------------------------------------|-------------------------------------|-----------------------|
|                    |                                                | luonnelt1 luonne highest ...        | 1 tapahtui potilaalle |
| Step 1             | luonnelt1 luonne highest = tapahtui potilaalle | 0 ingen händelse eller läheltä piti | 0                     |
|                    |                                                | 1 tapahtui potilaalle               | 0                     |
| Overall Percentage |                                                |                                     |                       |

Classification Table<sup>a</sup>

| Observed           |                                                | Predicted                           |       |
|--------------------|------------------------------------------------|-------------------------------------|-------|
|                    |                                                | Percentage Correct                  |       |
| Step 1             | luonnelt1 luonne highest = tapahtui potilaalle | 0 ingen händelse eller läheltä piti | 100,0 |
|                    |                                                | 1 tapahtui potilaalle               | ,0    |
| Overall Percentage |                                                |                                     | 93,2  |

a. The cut value is ,500

## Variables in the Equation

|                     |            | B      | S.E. | Wald    | df | Sig. | Exp(B) |
|---------------------|------------|--------|------|---------|----|------|--------|
| Step 1 <sup>a</sup> | bv2        |        |      | 5,271   | 2  | ,072 |        |
|                     | bv2(1)     | -,148  | ,103 | 2,044   | 1  | ,153 | ,863   |
|                     | bv2(2)     | ,066   | ,095 | ,481    | 1  | ,488 | 1,068  |
|                     | VASTY2     |        |      | 240,171 | 35 | ,000 |        |
|                     | VASTY2(1)  | ,086   | ,299 | ,082    | 1  | ,774 | 1,090  |
|                     | VASTY2(2)  | ,550   | ,275 | 4,013   | 1  | ,045 | 1,734  |
|                     | VASTY2(3)  | -1,471 | ,466 | 9,950   | 1  | ,002 | ,230   |
|                     | VASTY2(4)  | ,148   | ,294 | ,255    | 1  | ,613 | 1,160  |
|                     | VASTY2(5)  | -,194  | ,325 | ,355    | 1  | ,551 | ,824   |
|                     | VASTY2(6)  | -1,277 | ,439 | 8,456   | 1  | ,004 | ,279   |
|                     | VASTY2(7)  | ,560   | ,276 | 4,130   | 1  | ,042 | 1,752  |
|                     | VASTY2(8)  | -,250  | ,320 | ,608    | 1  | ,436 | ,779   |
|                     | VASTY2(9)  | ,270   | ,291 | ,856    | 1  | ,355 | 1,309  |
|                     | VASTY2(10) | 1,036  | ,259 | 16,065  | 1  | ,000 | 2,819  |
|                     | VASTY2(11) | ,617   | ,272 | 5,122   | 1  | ,024 | 1,852  |
|                     | VASTY2(12) | ,129   | ,295 | ,193    | 1  | ,661 | 1,138  |
|                     | VASTY2(13) | ,993   | ,261 | 14,512  | 1  | ,000 | 2,701  |
|                     | VASTY2(14) | -,245  | ,320 | ,587    | 1  | ,444 | ,782   |
|                     | VASTY2(15) | ,246   | ,289 | ,728    | 1  | ,393 | 1,279  |
|                     | VASTY2(16) | ,404   | ,331 | 1,490   | 1  | ,222 | 1,497  |
|                     | VASTY2(17) | -1,083 | ,418 | 6,711   | 1  | ,010 | ,339   |
|                     | VASTY2(18) | -,677  | ,365 | 3,442   | 1  | ,064 | ,508   |
|                     | VASTY2(19) | -1,706 | ,549 | 9,647   | 1  | ,002 | ,182   |
|                     | VASTY2(20) | ,046   | ,314 | ,021    | 1  | ,884 | 1,047  |
|                     | VASTY2(21) | -,122  | ,312 | ,152    | 1  | ,697 | ,886   |
|                     | VASTY2(22) | ,307   | ,291 | 1,111   | 1  | ,292 | 1,359  |
|                     | VASTY2(23) | ,278   | ,288 | ,928    | 1  | ,335 | 1,320  |
|                     | VASTY2(24) | ,280   | ,286 | ,955    | 1  | ,328 | 1,323  |
|                     | VASTY2(25) | ,300   | ,301 | ,995    | 1  | ,318 | 1,350  |
|                     | VASTY2(26) | -,945  | ,419 | 5,081   | 1  | ,024 | ,389   |
|                     | VASTY2(27) | -1,460 | ,466 | 9,827   | 1  | ,002 | ,232   |
|                     | VASTY2(28) | -1,008 | ,468 | 4,635   | 1  | ,031 | ,365   |
|                     | VASTY2(29) | -1,028 | ,401 | 6,576   | 1  | ,010 | ,358   |
|                     | VASTY2(30) | -,194  | ,316 | ,376    | 1  | ,540 | ,824   |
|                     | VASTY2(31) | ,490   | ,278 | 3,110   | 1  | ,078 | 1,632  |
|                     | VASTY2(32) | -,082  | ,312 | ,068    | 1  | ,794 | ,922   |
|                     | VASTY2(33) | -,002  | ,305 | ,000    | 1  | ,993 | ,998   |
|                     | VASTY2(34) | -1,268 | ,439 | 8,351   | 1  | ,004 | ,281   |
|                     | VASTY2(35) | ,659   | ,278 | 5,637   | 1  | ,018 | 1,933  |
|                     | weekday    |        |      | 12,024  | 6  | ,061 |        |
|                     | weekday(1) | -,007  | ,129 | ,003    | 1  | ,959 | ,993   |
|                     | weekday(2) | -,030  | ,130 | ,053    | 1  | ,818 | ,971   |

Variables in the Equation

|                     |            | 95% C.I. for EXP(B) |       |
|---------------------|------------|---------------------|-------|
|                     |            | Lower               | Upper |
| Step 1 <sup>a</sup> | bv2        |                     |       |
|                     | bv2(1)     | ,705                | 1,056 |
|                     | bv2(2)     | ,887                | 1,285 |
|                     | VASTY2     |                     |       |
|                     | VASTY2(1)  | ,606                | 1,960 |
|                     | VASTY2(2)  | 1,012               | 2,970 |
|                     | VASTY2(3)  | ,092                | ,573  |
|                     | VASTY2(4)  | ,652                | 2,063 |
|                     | VASTY2(5)  | ,436                | 1,558 |
|                     | VASTY2(6)  | ,118                | ,659  |
|                     | VASTY2(7)  | 1,020               | 3,007 |
|                     | VASTY2(8)  | ,416                | 1,459 |
|                     | VASTY2(9)  | ,740                | 2,318 |
|                     | VASTY2(10) | 1,698               | 4,679 |
|                     | VASTY2(11) | 1,086               | 3,160 |
|                     | VASTY2(12) | ,639                | 2,029 |
|                     | VASTY2(13) | 1,620               | 4,502 |
|                     | VASTY2(14) | ,418                | 1,466 |
|                     | VASTY2(15) | ,727                | 2,253 |
|                     | VASTY2(16) | ,783                | 2,862 |
|                     | VASTY2(17) | ,149                | ,768  |
|                     | VASTY2(18) | ,249                | 1,039 |
|                     | VASTY2(19) | ,062                | ,533  |
|                     | VASTY2(20) | ,566                | 1,938 |
|                     | VASTY2(21) | ,480                | 1,632 |
|                     | VASTY2(22) | ,768                | 2,404 |
|                     | VASTY2(23) | ,750                | 2,322 |
|                     | VASTY2(24) | ,755                | 2,317 |
|                     | VASTY2(25) | ,749                | 2,435 |
|                     | VASTY2(26) | ,171                | ,884  |
|                     | VASTY2(27) | ,093                | ,579  |
|                     | VASTY2(28) | ,146                | ,914  |
|                     | VASTY2(29) | ,163                | ,785  |
|                     | VASTY2(30) | ,444                | 1,530 |
|                     | VASTY2(31) | ,947                | 2,813 |
|                     | VASTY2(32) | ,500                | 1,700 |
|                     | VASTY2(33) | ,548                | 1,815 |
|                     | VASTY2(34) | ,119                | ,665  |
|                     | VASTY2(35) | 1,122               | 3,331 |
|                     | weekday    |                     |       |
|                     | weekday(1) | ,771                | 1,280 |
|                     | weekday(2) | ,752                | 1,252 |

review only

## Variables in the Equation

|            | B      | S.E. | Wald    | df | Sig. | Exp(B) |
|------------|--------|------|---------|----|------|--------|
| weekday(3) | -,041  | ,130 | ,097    | 1  | ,755 | ,960   |
| weekday(4) | ,039   | ,129 | ,090    | 1  | ,764 | 1,039  |
| weekday(5) | -,228  | ,139 | 2,691   | 1  | ,101 | ,796   |
| weekday(6) | -,363  | ,144 | 6,400   | 1  | ,011 | ,695   |
| holiday(1) | -,438  | ,253 | 3,006   | 1  | ,083 | ,645   |
| season     |        |      | 3,856   | 4  | ,426 |        |
| season(1)  | -,115  | ,113 | 1,031   | 1  | ,310 | ,891   |
| season(2)  | -,120  | ,106 | 1,285   | 1  | ,257 | ,887   |
| season(3)  | ,066   | ,108 | ,370    | 1  | ,543 | 1,068  |
| season(4)  | -,078  | ,115 | ,457    | 1  | ,499 | ,925   |
| Constant   | -2,505 | ,246 | 103,317 | 1  | ,000 | ,082   |

## Variables in the Equation

|            | 95% C.I. for EXP(B) |       |
|------------|---------------------|-------|
|            | Lower               | Upper |
| weekday(3) | ,744                | 1,240 |
| weekday(4) | ,807                | 1,338 |
| weekday(5) | ,606                | 1,045 |
| weekday(6) | ,525                | ,921  |
| holiday(1) | ,393                | 1,059 |
| season     |                     |       |
| season(1)  | ,714                | 1,113 |
| season(2)  | ,721                | 1,091 |
| season(3)  | ,864                | 1,321 |
| season(4)  | ,738                | 1,159 |
| Constant   |                     |       |

a. Variable(s) entered on step 1: bv2, VASTY2, weekday, holiday, season.

```
LOGISTIC REGRESSION VARIABLES luonnelt1
/METHOD=ENTER bv3 VASTY2 weekday holiday season
/CONTRAST (bv3)=Indicator(1)
/CONTRAST (VASTY2)=Indicator(1)
/CONTRAST (weekday)=Indicator(1)
/CONTRAST (holiday)=Indicator(1)
/CONTRAST (season)=Indicator(1)
/PRINT=CI(95)
/CRITERIA=PIN(0.05) POUT(0.10) ITERATE(20) CUT(0.5).
```

## Logistic Regression

[DataSet6] C:\cWordjan\Rafaela\_VCS\alla\_tillsammans\abo\_bjo\_vasa\_v1.sav

**Case Processing Summary**

| Unweighted Cases <sup>a</sup> |                      | N     | Percent |
|-------------------------------|----------------------|-------|---------|
| Selected Cases                | Included in Analysis | 12475 | 100,0   |
|                               | Missing Cases        | 0     | ,0      |
|                               | Total                | 12475 | 100,0   |
| Unselected Cases              |                      | 0     | ,0      |
| Total                         |                      | 12475 | 100,0   |

a. If weight is in effect, see classification table for the total number of cases.

**Dependent Variable Encoding**

| Original Value                      | Internal Value |
|-------------------------------------|----------------|
| 0 ingen händelse eller läheltä piti | 0              |
| 1 tapahtui potilaalle               | 1              |

**Categorical Variables Codings**

|                           | Frequency |
|---------------------------|-----------|
| VASTY2 (SAIR*10000)+VASTY | 365       |
| 403073101                 | 362       |
| 403073102                 | 365       |
| 403073103                 | 365       |
| 403073202                 | 365       |
| 403073203                 | 365       |
| 403073204                 | 330       |
| 403073303                 | 364       |
| 403073651                 | 362       |
| 403073771                 | 365       |
| 403133102                 | 341       |
| 403133106                 | 365       |
| 403133107                 | 365       |
| 403133109                 | 365       |
| 403133202                 | 365       |
| 403133203                 | 365       |
| 403133204                 | 365       |
| 403133315                 | 177       |
| 403133322                 | 365       |
| 403133401                 | 362       |
| 403133402                 | 365       |
| 403133550                 | 298       |
| 403133772                 | 365       |
| 403135803                 | 365       |
| 404060001                 | 365       |
| 404060002                 | 366       |
| 404310003                 | 291       |
| 404310004                 | 291       |

## Categorical Variables Codings

|                           |           | Parameter |
|---------------------------|-----------|-----------|
|                           |           | (1)       |
| VASTY2 (SAIR*10000)+VASTY | 403073101 | ,000      |
|                           | 403073102 | 1,000     |
|                           | 403073103 | ,000      |
|                           | 403073202 | ,000      |
|                           | 403073203 | ,000      |
|                           | 403073204 | ,000      |
|                           | 403073303 | ,000      |
|                           | 403073651 | ,000      |
|                           | 403073771 | ,000      |
|                           | 403133102 | ,000      |
|                           | 403133106 | ,000      |
|                           | 403133107 | ,000      |
|                           | 403133109 | ,000      |
|                           | 403133202 | ,000      |
|                           | 403133203 | ,000      |
|                           | 403133204 | ,000      |
|                           | 403133315 | ,000      |
|                           | 403133322 | ,000      |
|                           | 403133401 | ,000      |
|                           | 403133402 | ,000      |
|                           | 403133550 | ,000      |
|                           | 403133772 | ,000      |
|                           | 403135803 | ,000      |
|                           | 404060001 | ,000      |
|                           | 404060002 | ,000      |
|                           | 404310003 | ,000      |
|                           | 404310004 | ,000      |



1  
2  
3  
4  
5  
6  
7  
8  
9  
10  
11  
12  
13  
14  
15  
16  
17  
18  
19  
20  
21  
22  
23  
24  
25  
26  
27  
28  
29  
30  
31  
32  
33  
34  
35  
36  
37  
38  
39  
40  
41  
42  
43  
44  
45  
46  
47  
48  
49  
50  
51  
52  
53  
54  
55  
56  
57  
58  
59  
60

**Categorical Variables Codings**

|                           |           | Parameter |
|---------------------------|-----------|-----------|
|                           |           | (2)       |
| VASTY2 (SAIR*10000)+VASTY | 403073101 | ,000      |
|                           | 403073102 | ,000      |
|                           | 403073103 | 1,000     |
|                           | 403073202 | ,000      |
|                           | 403073203 | ,000      |
|                           | 403073204 | ,000      |
|                           | 403073303 | ,000      |
|                           | 403073651 | ,000      |
|                           | 403073771 | ,000      |
|                           | 403133102 | ,000      |
|                           | 403133106 | ,000      |
|                           | 403133107 | ,000      |
|                           | 403133109 | ,000      |
|                           | 403133202 | ,000      |
|                           | 403133203 | ,000      |
|                           | 403133204 | ,000      |
|                           | 403133315 | ,000      |
|                           | 403133322 | ,000      |
|                           | 403133401 | ,000      |
|                           | 403133402 | ,000      |
|                           | 403133550 | ,000      |
|                           | 403133772 | ,000      |
|                           | 403135803 | ,000      |
|                           | 404060001 | ,000      |
|                           | 404060002 | ,000      |
|                           | 404310003 | ,000      |
|                           | 404310004 | ,000      |

BMJ

## Categorical Variables Codings

|                           |           | Parameter |
|---------------------------|-----------|-----------|
|                           |           | (3)       |
| VASTY2 (SAIR*10000)+VASTY | 403073101 | ,000      |
|                           | 403073102 | ,000      |
|                           | 403073103 | ,000      |
|                           | 403073202 | 1,000     |
|                           | 403073203 | ,000      |
|                           | 403073204 | ,000      |
|                           | 403073303 | ,000      |
|                           | 403073651 | ,000      |
|                           | 403073771 | ,000      |
|                           | 403133102 | ,000      |
|                           | 403133106 | ,000      |
|                           | 403133107 | ,000      |
|                           | 403133109 | ,000      |
|                           | 403133202 | ,000      |
|                           | 403133203 | ,000      |
|                           | 403133204 | ,000      |
|                           | 403133315 | ,000      |
|                           | 403133322 | ,000      |
|                           | 403133401 | ,000      |
|                           | 403133402 | ,000      |
|                           | 403133550 | ,000      |
|                           | 403133772 | ,000      |
|                           | 403135803 | ,000      |
|                           | 404060001 | ,000      |
|                           | 404060002 | ,000      |
|                           | 404310003 | ,000      |
|                           | 404310004 | ,000      |

1  
2  
3  
4  
5  
6  
7  
8  
9  
10  
11  
12  
13  
14  
15  
16  
17  
18  
19  
20  
21  
22  
23  
24  
25  
26  
27  
28  
29  
30  
31  
32  
33  
34  
35  
36  
37  
38  
39  
40  
41  
42  
43  
44  
45  
46  
47  
48  
49  
50  
51  
52  
53  
54  
55  
56  
57  
58  
59  
60

**Categorical Variables Codings**

|                           |           | Parameter |
|---------------------------|-----------|-----------|
|                           |           | (4)       |
| VASTY2 (SAIR*10000)+VASTY | 403073101 | ,000      |
|                           | 403073102 | ,000      |
|                           | 403073103 | ,000      |
|                           | 403073202 | ,000      |
|                           | 403073203 | 1,000     |
|                           | 403073204 | ,000      |
|                           | 403073303 | ,000      |
|                           | 403073651 | ,000      |
|                           | 403073771 | ,000      |
|                           | 403133102 | ,000      |
|                           | 403133106 | ,000      |
|                           | 403133107 | ,000      |
|                           | 403133109 | ,000      |
|                           | 403133202 | ,000      |
|                           | 403133203 | ,000      |
|                           | 403133204 | ,000      |
|                           | 403133315 | ,000      |
|                           | 403133322 | ,000      |
|                           | 403133401 | ,000      |
|                           | 403133402 | ,000      |
|                           | 403133550 | ,000      |
|                           | 403133772 | ,000      |
|                           | 403135803 | ,000      |
|                           | 404060001 | ,000      |
|                           | 404060002 | ,000      |
|                           | 404310003 | ,000      |
|                           | 404310004 | ,000      |

BMJ

## Categorical Variables Codings

|                           |           | Parameter |
|---------------------------|-----------|-----------|
|                           |           | (5)       |
| VASTY2 (SAIR*10000)+VASTY | 403073101 | ,000      |
|                           | 403073102 | ,000      |
|                           | 403073103 | ,000      |
|                           | 403073202 | ,000      |
|                           | 403073203 | ,000      |
|                           | 403073204 | 1,000     |
|                           | 403073303 | ,000      |
|                           | 403073651 | ,000      |
|                           | 403073771 | ,000      |
|                           | 403133102 | ,000      |
|                           | 403133106 | ,000      |
|                           | 403133107 | ,000      |
|                           | 403133109 | ,000      |
|                           | 403133202 | ,000      |
|                           | 403133203 | ,000      |
|                           | 403133204 | ,000      |
|                           | 403133315 | ,000      |
|                           | 403133322 | ,000      |
|                           | 403133401 | ,000      |
|                           | 403133402 | ,000      |
|                           | 403133550 | ,000      |
|                           | 403133772 | ,000      |
|                           | 403135803 | ,000      |
|                           | 404060001 | ,000      |
|                           | 404060002 | ,000      |
|                           | 404310003 | ,000      |
|                           | 404310004 | ,000      |

## Categorical Variables Codings

|                           |           | Parameter |
|---------------------------|-----------|-----------|
|                           |           | (6)       |
| VASTY2 (SAIR*10000)+VASTY | 403073101 | ,000      |
|                           | 403073102 | ,000      |
|                           | 403073103 | ,000      |
|                           | 403073202 | ,000      |
|                           | 403073203 | ,000      |
|                           | 403073204 | ,000      |
|                           | 403073303 | 1,000     |
|                           | 403073651 | ,000      |
|                           | 403073771 | ,000      |
|                           | 403133102 | ,000      |
|                           | 403133106 | ,000      |
|                           | 403133107 | ,000      |
|                           | 403133109 | ,000      |
|                           | 403133202 | ,000      |
|                           | 403133203 | ,000      |
|                           | 403133204 | ,000      |
|                           | 403133315 | ,000      |
|                           | 403133322 | ,000      |
|                           | 403133401 | ,000      |
|                           | 403133402 | ,000      |
|                           | 403133550 | ,000      |
|                           | 403133772 | ,000      |
|                           | 403135803 | ,000      |
|                           | 404060001 | ,000      |
|                           | 404060002 | ,000      |
|                           | 404310003 | ,000      |
|                           | 404310004 | ,000      |

## Categorical Variables Codings

|                           |           | Parameter |
|---------------------------|-----------|-----------|
|                           |           | (7)       |
| VASTY2 (SAIR*10000)+VASTY | 403073101 | ,000      |
|                           | 403073102 | ,000      |
|                           | 403073103 | ,000      |
|                           | 403073202 | ,000      |
|                           | 403073203 | ,000      |
|                           | 403073204 | ,000      |
|                           | 403073303 | ,000      |
|                           | 403073651 | 1,000     |
|                           | 403073771 | ,000      |
|                           | 403133102 | ,000      |
|                           | 403133106 | ,000      |
|                           | 403133107 | ,000      |
|                           | 403133109 | ,000      |
|                           | 403133202 | ,000      |
|                           | 403133203 | ,000      |
|                           | 403133204 | ,000      |
|                           | 403133315 | ,000      |
|                           | 403133322 | ,000      |
|                           | 403133401 | ,000      |
|                           | 403133402 | ,000      |
|                           | 403133550 | ,000      |
|                           | 403133772 | ,000      |
|                           | 403135803 | ,000      |
|                           | 404060001 | ,000      |
|                           | 404060002 | ,000      |
|                           | 404310003 | ,000      |
|                           | 404310004 | ,000      |

1  
2  
3  
4  
5  
6  
7  
8  
9  
10  
11  
12  
13  
14  
15  
16  
17  
18  
19  
20  
21  
22  
23  
24  
25  
26  
27  
28  
29  
30  
31  
32  
33  
34  
35  
36  
37  
38  
39  
40  
41  
42  
43  
44  
45  
46  
47  
48  
49  
50  
51  
52  
53  
54  
55  
56  
57  
58  
59  
60

**Categorical Variables Codings**

|                           |           | Parameter |
|---------------------------|-----------|-----------|
|                           |           | (8)       |
| VASTY2 (SAIR*10000)+VASTY | 403073101 | ,000      |
|                           | 403073102 | ,000      |
|                           | 403073103 | ,000      |
|                           | 403073202 | ,000      |
|                           | 403073203 | ,000      |
|                           | 403073204 | ,000      |
|                           | 403073303 | ,000      |
|                           | 403073651 | ,000      |
|                           | 403073771 | 1,000     |
|                           | 403133102 | ,000      |
|                           | 403133106 | ,000      |
|                           | 403133107 | ,000      |
|                           | 403133109 | ,000      |
|                           | 403133202 | ,000      |
|                           | 403133203 | ,000      |
|                           | 403133204 | ,000      |
|                           | 403133315 | ,000      |
|                           | 403133322 | ,000      |
|                           | 403133401 | ,000      |
|                           | 403133402 | ,000      |
|                           | 403133550 | ,000      |
|                           | 403133772 | ,000      |
|                           | 403135803 | ,000      |
|                           | 404060001 | ,000      |
|                           | 404060002 | ,000      |
|                           | 404310003 | ,000      |
|                           | 404310004 | ,000      |

BMJ

## Categorical Variables Codings

|                           |           | Parameter |
|---------------------------|-----------|-----------|
|                           |           | (9)       |
| VASTY2 (SAIR*10000)+VASTY | 403073101 | ,000      |
|                           | 403073102 | ,000      |
|                           | 403073103 | ,000      |
|                           | 403073202 | ,000      |
|                           | 403073203 | ,000      |
|                           | 403073204 | ,000      |
|                           | 403073303 | ,000      |
|                           | 403073651 | ,000      |
|                           | 403073771 | ,000      |
|                           | 403133102 | 1,000     |
|                           | 403133106 | ,000      |
|                           | 403133107 | ,000      |
|                           | 403133109 | ,000      |
|                           | 403133202 | ,000      |
|                           | 403133203 | ,000      |
|                           | 403133204 | ,000      |
|                           | 403133315 | ,000      |
|                           | 403133322 | ,000      |
|                           | 403133401 | ,000      |
|                           | 403133402 | ,000      |
|                           | 403133550 | ,000      |
|                           | 403133772 | ,000      |
|                           | 403135803 | ,000      |
|                           | 404060001 | ,000      |
|                           | 404060002 | ,000      |
|                           | 404310003 | ,000      |
|                           | 404310004 | ,000      |



1  
2  
3  
4  
5  
6  
7  
8  
9  
10  
11  
12  
13  
14  
15  
16  
17  
18  
19  
20  
21  
22  
23  
24  
25  
26  
27  
28  
29  
30  
31  
32  
33  
34  
35  
36  
37  
38  
39  
40  
41  
42  
43  
44  
45  
46  
47  
48  
49  
50  
51  
52  
53  
54  
55  
56  
57  
58  
59  
60

**Categorical Variables Codings**

|                           |           | Parameter |
|---------------------------|-----------|-----------|
|                           |           | (10)      |
| VASTY2 (SAIR*10000)+VASTY | 403073101 | ,000      |
|                           | 403073102 | ,000      |
|                           | 403073103 | ,000      |
|                           | 403073202 | ,000      |
|                           | 403073203 | ,000      |
|                           | 403073204 | ,000      |
|                           | 403073303 | ,000      |
|                           | 403073651 | ,000      |
|                           | 403073771 | ,000      |
|                           | 403133102 | ,000      |
|                           | 403133106 | 1,000     |
|                           | 403133107 | ,000      |
|                           | 403133109 | ,000      |
|                           | 403133202 | ,000      |
|                           | 403133203 | ,000      |
|                           | 403133204 | ,000      |
|                           | 403133315 | ,000      |
|                           | 403133322 | ,000      |
|                           | 403133401 | ,000      |
|                           | 403133402 | ,000      |
|                           | 403133550 | ,000      |
|                           | 403133772 | ,000      |
|                           | 403135803 | ,000      |
|                           | 404060001 | ,000      |
|                           | 404060002 | ,000      |
|                           | 404310003 | ,000      |
|                           | 404310004 | ,000      |

BMJ

## Categorical Variables Codings

|                           |           | Parameter |
|---------------------------|-----------|-----------|
|                           |           | (11)      |
| VASTY2 (SAIR*10000)+VASTY | 403073101 | ,000      |
|                           | 403073102 | ,000      |
|                           | 403073103 | ,000      |
|                           | 403073202 | ,000      |
|                           | 403073203 | ,000      |
|                           | 403073204 | ,000      |
|                           | 403073303 | ,000      |
|                           | 403073651 | ,000      |
|                           | 403073771 | ,000      |
|                           | 403133102 | ,000      |
|                           | 403133106 | ,000      |
|                           | 403133107 | 1,000     |
|                           | 403133109 | ,000      |
|                           | 403133202 | ,000      |
|                           | 403133203 | ,000      |
|                           | 403133204 | ,000      |
|                           | 403133315 | ,000      |
|                           | 403133322 | ,000      |
|                           | 403133401 | ,000      |
|                           | 403133402 | ,000      |
|                           | 403133550 | ,000      |
|                           | 403133772 | ,000      |
|                           | 403135803 | ,000      |
|                           | 404060001 | ,000      |
|                           | 404060002 | ,000      |
|                           | 404310003 | ,000      |
|                           | 404310004 | ,000      |

1  
2  
3  
4  
5  
6  
7  
8  
9  
10  
11  
12  
13  
14  
15  
16  
17  
18  
19  
20  
21  
22  
23  
24  
25  
26  
27  
28  
29  
30  
31  
32  
33  
34  
35  
36  
37  
38  
39  
40  
41  
42  
43  
44  
45  
46  
47  
48  
49  
50  
51  
52  
53  
54  
55  
56  
57  
58  
59  
60

**Categorical Variables Codings**

|                           |           | Parameter |
|---------------------------|-----------|-----------|
|                           |           | (12)      |
| VASTY2 (SAIR*10000)+VASTY | 403073101 | ,000      |
|                           | 403073102 | ,000      |
|                           | 403073103 | ,000      |
|                           | 403073202 | ,000      |
|                           | 403073203 | ,000      |
|                           | 403073204 | ,000      |
|                           | 403073303 | ,000      |
|                           | 403073651 | ,000      |
|                           | 403073771 | ,000      |
|                           | 403133102 | ,000      |
|                           | 403133106 | ,000      |
|                           | 403133107 | ,000      |
|                           | 403133109 | 1,000     |
|                           | 403133202 | ,000      |
|                           | 403133203 | ,000      |
|                           | 403133204 | ,000      |
|                           | 403133315 | ,000      |
|                           | 403133322 | ,000      |
|                           | 403133401 | ,000      |
|                           | 403133402 | ,000      |
|                           | 403133550 | ,000      |
|                           | 403133772 | ,000      |
|                           | 403135803 | ,000      |
|                           | 404060001 | ,000      |
|                           | 404060002 | ,000      |
|                           | 404310003 | ,000      |
|                           | 404310004 | ,000      |

BMJ

## Categorical Variables Codings

|                           |           | Parameter |
|---------------------------|-----------|-----------|
|                           |           | (13)      |
| VASTY2 (SAIR*10000)+VASTY | 403073101 | ,000      |
|                           | 403073102 | ,000      |
|                           | 403073103 | ,000      |
|                           | 403073202 | ,000      |
|                           | 403073203 | ,000      |
|                           | 403073204 | ,000      |
|                           | 403073303 | ,000      |
|                           | 403073651 | ,000      |
|                           | 403073771 | ,000      |
|                           | 403133102 | ,000      |
|                           | 403133106 | ,000      |
|                           | 403133107 | ,000      |
|                           | 403133109 | ,000      |
|                           | 403133202 | 1,000     |
|                           | 403133203 | ,000      |
|                           | 403133204 | ,000      |
|                           | 403133315 | ,000      |
|                           | 403133322 | ,000      |
|                           | 403133401 | ,000      |
|                           | 403133402 | ,000      |
|                           | 403133550 | ,000      |
|                           | 403133772 | ,000      |
|                           | 403135803 | ,000      |
|                           | 404060001 | ,000      |
|                           | 404060002 | ,000      |
|                           | 404310003 | ,000      |
|                           | 404310004 | ,000      |

1  
2  
3  
4  
5  
6  
7  
8  
9  
10  
11  
12  
13  
14  
15  
16  
17  
18  
19  
20  
21  
22  
23  
24  
25  
26  
27  
28  
29  
30  
31  
32  
33  
34  
35  
36  
37  
38  
39  
40  
41  
42  
43  
44  
45  
46  
47  
48  
49  
50  
51  
52  
53  
54  
55  
56  
57  
58  
59  
60

**Categorical Variables Codings**

|                           |           | Parameter |
|---------------------------|-----------|-----------|
|                           |           | (14)      |
| VASTY2 (SAIR*10000)+VASTY | 403073101 | ,000      |
|                           | 403073102 | ,000      |
|                           | 403073103 | ,000      |
|                           | 403073202 | ,000      |
|                           | 403073203 | ,000      |
|                           | 403073204 | ,000      |
|                           | 403073303 | ,000      |
|                           | 403073651 | ,000      |
|                           | 403073771 | ,000      |
|                           | 403133102 | ,000      |
|                           | 403133106 | ,000      |
|                           | 403133107 | ,000      |
|                           | 403133109 | ,000      |
|                           | 403133202 | ,000      |
|                           | 403133203 | 1,000     |
|                           | 403133204 | ,000      |
|                           | 403133315 | ,000      |
|                           | 403133322 | ,000      |
|                           | 403133401 | ,000      |
|                           | 403133402 | ,000      |
|                           | 403133550 | ,000      |
|                           | 403133772 | ,000      |
|                           | 403135803 | ,000      |
|                           | 404060001 | ,000      |
|                           | 404060002 | ,000      |
|                           | 404310003 | ,000      |
|                           | 404310004 | ,000      |

BMJ

## Categorical Variables Codings

|                           |           | Parameter |
|---------------------------|-----------|-----------|
|                           |           | (15)      |
| VASTY2 (SAIR*10000)+VASTY | 403073101 | ,000      |
|                           | 403073102 | ,000      |
|                           | 403073103 | ,000      |
|                           | 403073202 | ,000      |
|                           | 403073203 | ,000      |
|                           | 403073204 | ,000      |
|                           | 403073303 | ,000      |
|                           | 403073651 | ,000      |
|                           | 403073771 | ,000      |
|                           | 403133102 | ,000      |
|                           | 403133106 | ,000      |
|                           | 403133107 | ,000      |
|                           | 403133109 | ,000      |
|                           | 403133202 | ,000      |
|                           | 403133203 | ,000      |
|                           | 403133204 | 1,000     |
|                           | 403133315 | ,000      |
|                           | 403133322 | ,000      |
|                           | 403133401 | ,000      |
|                           | 403133402 | ,000      |
|                           | 403133550 | ,000      |
|                           | 403133772 | ,000      |
|                           | 403135803 | ,000      |
|                           | 404060001 | ,000      |
|                           | 404060002 | ,000      |
|                           | 404310003 | ,000      |
|                           | 404310004 | ,000      |

## Categorical Variables Codings

|                           |           | Parameter |
|---------------------------|-----------|-----------|
|                           |           | (16)      |
| VASTY2 (SAIR*10000)+VASTY | 403073101 | ,000      |
|                           | 403073102 | ,000      |
|                           | 403073103 | ,000      |
|                           | 403073202 | ,000      |
|                           | 403073203 | ,000      |
|                           | 403073204 | ,000      |
|                           | 403073303 | ,000      |
|                           | 403073651 | ,000      |
|                           | 403073771 | ,000      |
|                           | 403133102 | ,000      |
|                           | 403133106 | ,000      |
|                           | 403133107 | ,000      |
|                           | 403133109 | ,000      |
|                           | 403133202 | ,000      |
|                           | 403133203 | ,000      |
|                           | 403133204 | ,000      |
|                           | 403133315 | 1,000     |
|                           | 403133322 | ,000      |
|                           | 403133401 | ,000      |
|                           | 403133402 | ,000      |
|                           | 403133550 | ,000      |
|                           | 403133772 | ,000      |
|                           | 403135803 | ,000      |
|                           | 404060001 | ,000      |
|                           | 404060002 | ,000      |
|                           | 404310003 | ,000      |
|                           | 404310004 | ,000      |

## Categorical Variables Codings

|                           |           | Parameter |
|---------------------------|-----------|-----------|
|                           |           | (17)      |
| VASTY2 (SAIR*10000)+VASTY | 403073101 | ,000      |
|                           | 403073102 | ,000      |
|                           | 403073103 | ,000      |
|                           | 403073202 | ,000      |
|                           | 403073203 | ,000      |
|                           | 403073204 | ,000      |
|                           | 403073303 | ,000      |
|                           | 403073651 | ,000      |
|                           | 403073771 | ,000      |
|                           | 403133102 | ,000      |
|                           | 403133106 | ,000      |
|                           | 403133107 | ,000      |
|                           | 403133109 | ,000      |
|                           | 403133202 | ,000      |
|                           | 403133203 | ,000      |
|                           | 403133204 | ,000      |
|                           | 403133315 | ,000      |
|                           | 403133322 | 1,000     |
|                           | 403133401 | ,000      |
|                           | 403133402 | ,000      |
|                           | 403133550 | ,000      |
|                           | 403133772 | ,000      |
|                           | 403135803 | ,000      |
|                           | 404060001 | ,000      |
|                           | 404060002 | ,000      |
|                           | 404310003 | ,000      |
|                           | 404310004 | ,000      |



1  
2  
3  
4  
5  
6  
7  
8  
9  
10  
11  
12  
13  
14  
15  
16  
17  
18  
19  
20  
21  
22  
23  
24  
25  
26  
27  
28  
29  
30  
31  
32  
33  
34  
35  
36  
37  
38  
39  
40  
41  
42  
43  
44  
45  
46  
47  
48  
49  
50  
51  
52  
53  
54  
55  
56  
57  
58  
59  
60

**Categorical Variables Codings**

|                           |           | Parameter |
|---------------------------|-----------|-----------|
|                           |           | (18)      |
| VASTY2 (SAIR*10000)+VASTY | 403073101 | ,000      |
|                           | 403073102 | ,000      |
|                           | 403073103 | ,000      |
|                           | 403073202 | ,000      |
|                           | 403073203 | ,000      |
|                           | 403073204 | ,000      |
|                           | 403073303 | ,000      |
|                           | 403073651 | ,000      |
|                           | 403073771 | ,000      |
|                           | 403133102 | ,000      |
|                           | 403133106 | ,000      |
|                           | 403133107 | ,000      |
|                           | 403133109 | ,000      |
|                           | 403133202 | ,000      |
|                           | 403133203 | ,000      |
|                           | 403133204 | ,000      |
|                           | 403133315 | ,000      |
|                           | 403133322 | ,000      |
|                           | 403133401 | 1,000     |
|                           | 403133402 | ,000      |
|                           | 403133550 | ,000      |
|                           | 403133772 | ,000      |
|                           | 403135803 | ,000      |
|                           | 404060001 | ,000      |
|                           | 404060002 | ,000      |
|                           | 404310003 | ,000      |
|                           | 404310004 | ,000      |

BMJ

## Categorical Variables Codings

|                           |           | Parameter |
|---------------------------|-----------|-----------|
|                           |           | (19)      |
| VASTY2 (SAIR*10000)+VASTY | 403073101 | ,000      |
|                           | 403073102 | ,000      |
|                           | 403073103 | ,000      |
|                           | 403073202 | ,000      |
|                           | 403073203 | ,000      |
|                           | 403073204 | ,000      |
|                           | 403073303 | ,000      |
|                           | 403073651 | ,000      |
|                           | 403073771 | ,000      |
|                           | 403133102 | ,000      |
|                           | 403133106 | ,000      |
|                           | 403133107 | ,000      |
|                           | 403133109 | ,000      |
|                           | 403133202 | ,000      |
|                           | 403133203 | ,000      |
|                           | 403133204 | ,000      |
|                           | 403133315 | ,000      |
|                           | 403133322 | ,000      |
|                           | 403133401 | ,000      |
|                           | 403133402 | 1,000     |
|                           | 403133550 | ,000      |
|                           | 403133772 | ,000      |
|                           | 403135803 | ,000      |
|                           | 404060001 | ,000      |
|                           | 404060002 | ,000      |
|                           | 404310003 | ,000      |
|                           | 404310004 | ,000      |

1  
2  
3  
4  
5  
6  
7  
8  
9  
10  
11  
12  
13  
14  
15  
16  
17  
18  
19  
20  
21  
22  
23  
24  
25  
26  
27  
28  
29  
30  
31  
32  
33  
34  
35  
36  
37  
38  
39  
40  
41  
42  
43  
44  
45  
46  
47  
48  
49  
50  
51  
52  
53  
54  
55  
56  
57  
58  
59  
60

**Categorical Variables Codings**

|                           |           | Parameter |
|---------------------------|-----------|-----------|
|                           |           | (20)      |
| VASTY2 (SAIR*10000)+VASTY | 403073101 | ,000      |
|                           | 403073102 | ,000      |
|                           | 403073103 | ,000      |
|                           | 403073202 | ,000      |
|                           | 403073203 | ,000      |
|                           | 403073204 | ,000      |
|                           | 403073303 | ,000      |
|                           | 403073651 | ,000      |
|                           | 403073771 | ,000      |
|                           | 403133102 | ,000      |
|                           | 403133106 | ,000      |
|                           | 403133107 | ,000      |
|                           | 403133109 | ,000      |
|                           | 403133202 | ,000      |
|                           | 403133203 | ,000      |
|                           | 403133204 | ,000      |
|                           | 403133315 | ,000      |
|                           | 403133322 | ,000      |
|                           | 403133401 | ,000      |
|                           | 403133402 | ,000      |
|                           | 403133550 | 1,000     |
|                           | 403133772 | ,000      |
|                           | 403135803 | ,000      |
|                           | 404060001 | ,000      |
|                           | 404060002 | ,000      |
|                           | 404310003 | ,000      |
|                           | 404310004 | ,000      |

BMJ

## Categorical Variables Codings

|                           |           | Parameter |
|---------------------------|-----------|-----------|
|                           |           | (21)      |
| VASTY2 (SAIR*10000)+VASTY | 403073101 | ,000      |
|                           | 403073102 | ,000      |
|                           | 403073103 | ,000      |
|                           | 403073202 | ,000      |
|                           | 403073203 | ,000      |
|                           | 403073204 | ,000      |
|                           | 403073303 | ,000      |
|                           | 403073651 | ,000      |
|                           | 403073771 | ,000      |
|                           | 403133102 | ,000      |
|                           | 403133106 | ,000      |
|                           | 403133107 | ,000      |
|                           | 403133109 | ,000      |
|                           | 403133202 | ,000      |
|                           | 403133203 | ,000      |
|                           | 403133204 | ,000      |
|                           | 403133315 | ,000      |
|                           | 403133322 | ,000      |
|                           | 403133401 | ,000      |
|                           | 403133402 | ,000      |
|                           | 403133550 | ,000      |
|                           | 403133772 | 1,000     |
|                           | 403135803 | ,000      |
|                           | 404060001 | ,000      |
|                           | 404060002 | ,000      |
|                           | 404310003 | ,000      |
|                           | 404310004 | ,000      |

## Categorical Variables Codings

|                           |           | Parameter |
|---------------------------|-----------|-----------|
|                           |           | (22)      |
| VASTY2 (SAIR*10000)+VASTY | 403073101 | ,000      |
|                           | 403073102 | ,000      |
|                           | 403073103 | ,000      |
|                           | 403073202 | ,000      |
|                           | 403073203 | ,000      |
|                           | 403073204 | ,000      |
|                           | 403073303 | ,000      |
|                           | 403073651 | ,000      |
|                           | 403073771 | ,000      |
|                           | 403133102 | ,000      |
|                           | 403133106 | ,000      |
|                           | 403133107 | ,000      |
|                           | 403133109 | ,000      |
|                           | 403133202 | ,000      |
|                           | 403133203 | ,000      |
|                           | 403133204 | ,000      |
|                           | 403133315 | ,000      |
|                           | 403133322 | ,000      |
|                           | 403133401 | ,000      |
|                           | 403133402 | ,000      |
|                           | 403133550 | ,000      |
|                           | 403133772 | ,000      |
|                           | 403135803 | 1,000     |
|                           | 404060001 | ,000      |
|                           | 404060002 | ,000      |
|                           | 404310003 | ,000      |
|                           | 404310004 | ,000      |

## Categorical Variables Codings

|                           |           | Parameter |
|---------------------------|-----------|-----------|
|                           |           | (23)      |
| VASTY2 (SAIR*10000)+VASTY | 403073101 | ,000      |
|                           | 403073102 | ,000      |
|                           | 403073103 | ,000      |
|                           | 403073202 | ,000      |
|                           | 403073203 | ,000      |
|                           | 403073204 | ,000      |
|                           | 403073303 | ,000      |
|                           | 403073651 | ,000      |
|                           | 403073771 | ,000      |
|                           | 403133102 | ,000      |
|                           | 403133106 | ,000      |
|                           | 403133107 | ,000      |
|                           | 403133109 | ,000      |
|                           | 403133202 | ,000      |
|                           | 403133203 | ,000      |
|                           | 403133204 | ,000      |
|                           | 403133315 | ,000      |
|                           | 403133322 | ,000      |
|                           | 403133401 | ,000      |
|                           | 403133402 | ,000      |
|                           | 403133550 | ,000      |
|                           | 403133772 | ,000      |
|                           | 403135803 | ,000      |
|                           | 404060001 | 1,000     |
|                           | 404060002 | ,000      |
|                           | 404310003 | ,000      |
|                           | 404310004 | ,000      |

**Categorical Variables Codings**

|                           |           | Parameter |
|---------------------------|-----------|-----------|
|                           |           | (24)      |
| VASTY2 (SAIR*10000)+VASTY | 403073101 | ,000      |
|                           | 403073102 | ,000      |
|                           | 403073103 | ,000      |
|                           | 403073202 | ,000      |
|                           | 403073203 | ,000      |
|                           | 403073204 | ,000      |
|                           | 403073303 | ,000      |
|                           | 403073651 | ,000      |
|                           | 403073771 | ,000      |
|                           | 403133102 | ,000      |
|                           | 403133106 | ,000      |
|                           | 403133107 | ,000      |
|                           | 403133109 | ,000      |
|                           | 403133202 | ,000      |
|                           | 403133203 | ,000      |
|                           | 403133204 | ,000      |
|                           | 403133315 | ,000      |
|                           | 403133322 | ,000      |
|                           | 403133401 | ,000      |
|                           | 403133402 | ,000      |
|                           | 403133550 | ,000      |
|                           | 403133772 | ,000      |
|                           | 403135803 | ,000      |
|                           | 404060001 | ,000      |
|                           | 404060002 | 1,000     |
|                           | 404310003 | ,000      |
|                           | 404310004 | ,000      |

BMJ

## Categorical Variables Codings

|                           |           | Parameter |
|---------------------------|-----------|-----------|
|                           |           | (25)      |
| VASTY2 (SAIR*10000)+VASTY | 403073101 | ,000      |
|                           | 403073102 | ,000      |
|                           | 403073103 | ,000      |
|                           | 403073202 | ,000      |
|                           | 403073203 | ,000      |
|                           | 403073204 | ,000      |
|                           | 403073303 | ,000      |
|                           | 403073651 | ,000      |
|                           | 403073771 | ,000      |
|                           | 403133102 | ,000      |
|                           | 403133106 | ,000      |
|                           | 403133107 | ,000      |
|                           | 403133109 | ,000      |
|                           | 403133202 | ,000      |
|                           | 403133203 | ,000      |
|                           | 403133204 | ,000      |
|                           | 403133315 | ,000      |
|                           | 403133322 | ,000      |
|                           | 403133401 | ,000      |
|                           | 403133402 | ,000      |
|                           | 403133550 | ,000      |
|                           | 403133772 | ,000      |
|                           | 403135803 | ,000      |
|                           | 404060001 | ,000      |
|                           | 404060002 | ,000      |
|                           | 404310003 | 1,000     |
|                           | 404310004 | ,000      |



**Categorical Variables Codings**

|                           |           | Parameter |
|---------------------------|-----------|-----------|
|                           |           | (26)      |
| VASTY2 (SAIR*10000)+VASTY | 403073101 | ,000      |
|                           | 403073102 | ,000      |
|                           | 403073103 | ,000      |
|                           | 403073202 | ,000      |
|                           | 403073203 | ,000      |
|                           | 403073204 | ,000      |
|                           | 403073303 | ,000      |
|                           | 403073651 | ,000      |
|                           | 403073771 | ,000      |
|                           | 403133102 | ,000      |
|                           | 403133106 | ,000      |
|                           | 403133107 | ,000      |
|                           | 403133109 | ,000      |
|                           | 403133202 | ,000      |
|                           | 403133203 | ,000      |
|                           | 403133204 | ,000      |
|                           | 403133315 | ,000      |
|                           | 403133322 | ,000      |
|                           | 403133401 | ,000      |
|                           | 403133402 | ,000      |
|                           | 403133550 | ,000      |
|                           | 403133772 | ,000      |
|                           | 403135803 | ,000      |
|                           | 404060001 | ,000      |
|                           | 404060002 | ,000      |
|                           | 404310003 | ,000      |
|                           | 404310004 | 1,000     |

BMJ

## Categorical Variables Codings

|                           |           | Parameter |
|---------------------------|-----------|-----------|
|                           |           | (27)      |
| VASTY2 (SAIR*10000)+VASTY | 403073101 | ,000      |
|                           | 403073102 | ,000      |
|                           | 403073103 | ,000      |
|                           | 403073202 | ,000      |
|                           | 403073203 | ,000      |
|                           | 403073204 | ,000      |
|                           | 403073303 | ,000      |
|                           | 403073651 | ,000      |
|                           | 403073771 | ,000      |
|                           | 403133102 | ,000      |
|                           | 403133106 | ,000      |
|                           | 403133107 | ,000      |
|                           | 403133109 | ,000      |
|                           | 403133202 | ,000      |
|                           | 403133203 | ,000      |
|                           | 403133204 | ,000      |
|                           | 403133315 | ,000      |
|                           | 403133322 | ,000      |
|                           | 403133401 | ,000      |
|                           | 403133402 | ,000      |
|                           | 403133550 | ,000      |
|                           | 403133772 | ,000      |
|                           | 403135803 | ,000      |
|                           | 404060001 | ,000      |
|                           | 404060002 | ,000      |
|                           | 404310003 | ,000      |
|                           | 404310004 | ,000      |

1  
2  
3  
4  
5  
6  
7  
8  
9  
10  
11  
12  
13  
14  
15  
16  
17  
18  
19  
20  
21  
22  
23  
24  
25  
26  
27  
28  
29  
30  
31  
32  
33  
34  
35  
36  
37  
38  
39  
40  
41  
42  
43  
44  
45  
46  
47  
48  
49  
50  
51  
52  
53  
54  
55  
56  
57  
58  
59  
60

**Categorical Variables Codings**

|                           |           | Parameter |
|---------------------------|-----------|-----------|
|                           |           | (28)      |
| VASTY2 (SAIR*10000)+VASTY | 403073101 | ,000      |
|                           | 403073102 | ,000      |
|                           | 403073103 | ,000      |
|                           | 403073202 | ,000      |
|                           | 403073203 | ,000      |
|                           | 403073204 | ,000      |
|                           | 403073303 | ,000      |
|                           | 403073651 | ,000      |
|                           | 403073771 | ,000      |
|                           | 403133102 | ,000      |
|                           | 403133106 | ,000      |
|                           | 403133107 | ,000      |
|                           | 403133109 | ,000      |
|                           | 403133202 | ,000      |
|                           | 403133203 | ,000      |
|                           | 403133204 | ,000      |
|                           | 403133315 | ,000      |
|                           | 403133322 | ,000      |
|                           | 403133401 | ,000      |
|                           | 403133402 | ,000      |
|                           | 403133550 | ,000      |
|                           | 403133772 | ,000      |
|                           | 403135803 | ,000      |
|                           | 404060001 | ,000      |
|                           | 404060002 | ,000      |
|                           | 404310003 | ,000      |
|                           | 404310004 | ,000      |

BMJ

## Categorical Variables Codings

|                           |           | Parameter |
|---------------------------|-----------|-----------|
|                           |           | (29)      |
| VASTY2 (SAIR*10000)+VASTY | 403073101 | ,000      |
|                           | 403073102 | ,000      |
|                           | 403073103 | ,000      |
|                           | 403073202 | ,000      |
|                           | 403073203 | ,000      |
|                           | 403073204 | ,000      |
|                           | 403073303 | ,000      |
|                           | 403073651 | ,000      |
|                           | 403073771 | ,000      |
|                           | 403133102 | ,000      |
|                           | 403133106 | ,000      |
|                           | 403133107 | ,000      |
|                           | 403133109 | ,000      |
|                           | 403133202 | ,000      |
|                           | 403133203 | ,000      |
|                           | 403133204 | ,000      |
|                           | 403133315 | ,000      |
|                           | 403133322 | ,000      |
|                           | 403133401 | ,000      |
|                           | 403133402 | ,000      |
|                           | 403133550 | ,000      |
|                           | 403133772 | ,000      |
|                           | 403135803 | ,000      |
|                           | 404060001 | ,000      |
|                           | 404060002 | ,000      |
|                           | 404310003 | ,000      |
|                           | 404310004 | ,000      |

## Categorical Variables Codings

|                           |           | Parameter |
|---------------------------|-----------|-----------|
|                           |           | (30)      |
| VASTY2 (SAIR*10000)+VASTY | 403073101 | ,000      |
|                           | 403073102 | ,000      |
|                           | 403073103 | ,000      |
|                           | 403073202 | ,000      |
|                           | 403073203 | ,000      |
|                           | 403073204 | ,000      |
|                           | 403073303 | ,000      |
|                           | 403073651 | ,000      |
|                           | 403073771 | ,000      |
|                           | 403133102 | ,000      |
|                           | 403133106 | ,000      |
|                           | 403133107 | ,000      |
|                           | 403133109 | ,000      |
|                           | 403133202 | ,000      |
|                           | 403133203 | ,000      |
|                           | 403133204 | ,000      |
|                           | 403133315 | ,000      |
|                           | 403133322 | ,000      |
|                           | 403133401 | ,000      |
|                           | 403133402 | ,000      |
|                           | 403133550 | ,000      |
|                           | 403133772 | ,000      |
|                           | 403135803 | ,000      |
|                           | 404060001 | ,000      |
|                           | 404060002 | ,000      |
|                           | 404310003 | ,000      |
|                           | 404310004 | ,000      |

## Categorical Variables Codings

|                           |           | Parameter |
|---------------------------|-----------|-----------|
|                           |           | (31)      |
| VASTY2 (SAIR*10000)+VASTY | 403073101 | ,000      |
|                           | 403073102 | ,000      |
|                           | 403073103 | ,000      |
|                           | 403073202 | ,000      |
|                           | 403073203 | ,000      |
|                           | 403073204 | ,000      |
|                           | 403073303 | ,000      |
|                           | 403073651 | ,000      |
|                           | 403073771 | ,000      |
|                           | 403133102 | ,000      |
|                           | 403133106 | ,000      |
|                           | 403133107 | ,000      |
|                           | 403133109 | ,000      |
|                           | 403133202 | ,000      |
|                           | 403133203 | ,000      |
|                           | 403133204 | ,000      |
|                           | 403133315 | ,000      |
|                           | 403133322 | ,000      |
|                           | 403133401 | ,000      |
|                           | 403133402 | ,000      |
|                           | 403133550 | ,000      |
|                           | 403133772 | ,000      |
|                           | 403135803 | ,000      |
|                           | 404060001 | ,000      |
|                           | 404060002 | ,000      |
|                           | 404310003 | ,000      |
|                           | 404310004 | ,000      |

## Categorical Variables Codings

|                           |           | Parameter |
|---------------------------|-----------|-----------|
|                           |           | (32)      |
| VASTY2 (SAIR*10000)+VASTY | 403073101 | ,000      |
|                           | 403073102 | ,000      |
|                           | 403073103 | ,000      |
|                           | 403073202 | ,000      |
|                           | 403073203 | ,000      |
|                           | 403073204 | ,000      |
|                           | 403073303 | ,000      |
|                           | 403073651 | ,000      |
|                           | 403073771 | ,000      |
|                           | 403133102 | ,000      |
|                           | 403133106 | ,000      |
|                           | 403133107 | ,000      |
|                           | 403133109 | ,000      |
|                           | 403133202 | ,000      |
|                           | 403133203 | ,000      |
|                           | 403133204 | ,000      |
|                           | 403133315 | ,000      |
|                           | 403133322 | ,000      |
|                           | 403133401 | ,000      |
|                           | 403133402 | ,000      |
|                           | 403133550 | ,000      |
|                           | 403133772 | ,000      |
|                           | 403135803 | ,000      |
|                           | 404060001 | ,000      |
|                           | 404060002 | ,000      |
|                           | 404310003 | ,000      |
|                           | 404310004 | ,000      |

## Categorical Variables Codings

|                           |           | Parameter |
|---------------------------|-----------|-----------|
|                           |           | (33)      |
| VASTY2 (SAIR*10000)+VASTY | 403073101 | ,000      |
|                           | 403073102 | ,000      |
|                           | 403073103 | ,000      |
|                           | 403073202 | ,000      |
|                           | 403073203 | ,000      |
|                           | 403073204 | ,000      |
|                           | 403073303 | ,000      |
|                           | 403073651 | ,000      |
|                           | 403073771 | ,000      |
|                           | 403133102 | ,000      |
|                           | 403133106 | ,000      |
|                           | 403133107 | ,000      |
|                           | 403133109 | ,000      |
|                           | 403133202 | ,000      |
|                           | 403133203 | ,000      |
|                           | 403133204 | ,000      |
|                           | 403133315 | ,000      |
|                           | 403133322 | ,000      |
|                           | 403133401 | ,000      |
|                           | 403133402 | ,000      |
|                           | 403133550 | ,000      |
|                           | 403133772 | ,000      |
|                           | 403135803 | ,000      |
|                           | 404060001 | ,000      |
|                           | 404060002 | ,000      |
|                           | 404310003 | ,000      |
|                           | 404310004 | ,000      |



1  
2  
3  
4  
5  
6  
7  
8  
9  
10  
11  
12  
13  
14  
15  
16  
17  
18  
19  
20  
21  
22  
23  
24  
25  
26  
27  
28  
29  
30  
31  
32  
33  
34  
35  
36  
37  
38  
39  
40  
41  
42  
43  
44  
45  
46  
47  
48  
49  
50  
51  
52  
53  
54  
55  
56  
57  
58  
59  
60

**Categorical Variables Codings**

|                           |           | Parameter |
|---------------------------|-----------|-----------|
|                           |           | (34)      |
| VASTY2 (SAIR*10000)+VASTY | 403073101 | ,000      |
|                           | 403073102 | ,000      |
|                           | 403073103 | ,000      |
|                           | 403073202 | ,000      |
|                           | 403073203 | ,000      |
|                           | 403073204 | ,000      |
|                           | 403073303 | ,000      |
|                           | 403073651 | ,000      |
|                           | 403073771 | ,000      |
|                           | 403133102 | ,000      |
|                           | 403133106 | ,000      |
|                           | 403133107 | ,000      |
|                           | 403133109 | ,000      |
|                           | 403133202 | ,000      |
|                           | 403133203 | ,000      |
|                           | 403133204 | ,000      |
|                           | 403133315 | ,000      |
|                           | 403133322 | ,000      |
|                           | 403133401 | ,000      |
|                           | 403133402 | ,000      |
|                           | 403133550 | ,000      |
|                           | 403133772 | ,000      |
|                           | 403135803 | ,000      |
|                           | 404060001 | ,000      |
|                           | 404060002 | ,000      |
|                           | 404310003 | ,000      |
|                           | 404310004 | ,000      |

BMJ

## Categorical Variables Codings

|                           |           | Paramete... |
|---------------------------|-----------|-------------|
|                           |           | (35)        |
| VASTY2 (SAIR*10000)+VASTY | 403073101 | ,000        |
|                           | 403073102 | ,000        |
|                           | 403073103 | ,000        |
|                           | 403073202 | ,000        |
|                           | 403073203 | ,000        |
|                           | 403073204 | ,000        |
|                           | 403073303 | ,000        |
|                           | 403073651 | ,000        |
|                           | 403073771 | ,000        |
|                           | 403133102 | ,000        |
|                           | 403133106 | ,000        |
|                           | 403133107 | ,000        |
|                           | 403133109 | ,000        |
|                           | 403133202 | ,000        |
|                           | 403133203 | ,000        |
|                           | 403133204 | ,000        |
|                           | 403133315 | ,000        |
|                           | 403133322 | ,000        |
|                           | 403133401 | ,000        |
|                           | 403133402 | ,000        |
|                           | 403133550 | ,000        |
|                           | 403133772 | ,000        |
|                           | 403135803 | ,000        |
|                           | 404060001 | ,000        |
|                           | 404060002 | ,000        |
|                           | 404310003 | ,000        |
|                           | 404310004 | ,000        |

## Categorical Variables Codings

|                                              |                                         | Frequency |
|----------------------------------------------|-----------------------------------------|-----------|
|                                              | 502300005                               | 366       |
|                                              | 502300006                               | 225       |
|                                              | 502300007                               | 366       |
|                                              | 502300214                               | 366       |
|                                              | 502300411                               | 366       |
|                                              | 502300415                               | 360       |
|                                              | 502300416                               | 363       |
|                                              | 502300811                               | 364       |
|                                              | 502300913                               | 315       |
| weekday veckodag                             | 1 måndag                                | 1805      |
|                                              | 2 tisdag                                | 1812      |
|                                              | 3 onsdag                                | 1800      |
|                                              | 4 torsdag                               | 1794      |
|                                              | 5 fredag                                | 1788      |
|                                              | 6 lördag                                | 1735      |
|                                              | 7 söndag                                | 1741      |
| season säsong/period                         | 1 januari-mars                          | 3182      |
|                                              | 2 april-maj                             | 2127      |
|                                              | 3 juni-augusti                          | 2911      |
|                                              | 4 september-oktober                     | 2144      |
|                                              | 5 november-december                     | 2111      |
| bv3 belasnting vs paoncil dubbla intervallet | 1 medelbelastning                       | 9121      |
|                                              | 2 underbelastning                       | 1505      |
|                                              | 3 överbelastning                        | 1849      |
| holiday större helg                          | 1 ingen större helg                     | 12078     |
|                                              | 2 större helg (påsk/midsommar/julonyår) | 397       |

## Categorical Variables Codings

|                                              |                                         | Parameter |
|----------------------------------------------|-----------------------------------------|-----------|
|                                              |                                         | (1)       |
|                                              | 502300005                               | ,000      |
|                                              | 502300006                               | ,000      |
|                                              | 502300007                               | ,000      |
|                                              | 502300214                               | ,000      |
|                                              | 502300411                               | ,000      |
|                                              | 502300415                               | ,000      |
|                                              | 502300416                               | ,000      |
|                                              | 502300811                               | ,000      |
|                                              | 502300913                               | ,000      |
| weekday veckodag                             | 1 måndag                                | ,000      |
|                                              | 2 tisdag                                | 1,000     |
|                                              | 3 onsdag                                | ,000      |
|                                              | 4 torsdag                               | ,000      |
|                                              | 5 fredag                                | ,000      |
|                                              | 6 lördag                                | ,000      |
|                                              | 7 söndag                                | ,000      |
| season säsong/period                         | 1 januari-mars                          | ,000      |
|                                              | 2 april-maj                             | 1,000     |
|                                              | 3 juni-augusti                          | ,000      |
|                                              | 4 september-oktober                     | ,000      |
|                                              | 5 november-december                     | ,000      |
| bv3 belasnting vs paoncil dubbla intervallet | 1 medelbelastning                       | ,000      |
|                                              | 2 underbelastning                       | 1,000     |
|                                              | 3 överbelastning                        | ,000      |
| holiday större helg                          | 1 ingen större helg                     | ,000      |
|                                              | 2 större helg (påsk/midsommar/julonyår) | 1,000     |

## Categorical Variables Codings

|                                              |                                         | Parameter |
|----------------------------------------------|-----------------------------------------|-----------|
|                                              |                                         | (2)       |
|                                              | 502300005                               | ,000      |
|                                              | 502300006                               | ,000      |
|                                              | 502300007                               | ,000      |
|                                              | 502300214                               | ,000      |
|                                              | 502300411                               | ,000      |
|                                              | 502300415                               | ,000      |
|                                              | 502300416                               | ,000      |
|                                              | 502300811                               | ,000      |
|                                              | 502300913                               | ,000      |
| weekday veckodag                             | 1 måndag                                | ,000      |
|                                              | 2 tisdag                                | ,000      |
|                                              | 3 onsdag                                | 1,000     |
|                                              | 4 torsdag                               | ,000      |
|                                              | 5 fredag                                | ,000      |
|                                              | 6 lördag                                | ,000      |
|                                              | 7 söndag                                | ,000      |
| season säsong/period                         | 1 januari-mars                          | ,000      |
|                                              | 2 april-maj                             | ,000      |
|                                              | 3 juni-augusti                          | 1,000     |
|                                              | 4 september-oktober                     | ,000      |
|                                              | 5 november-december                     | ,000      |
| bv3 belasnting vs paoncil dubbla intervallet | 1 medelbelastning                       | ,000      |
|                                              | 2 underbelastning                       | ,000      |
|                                              | 3 överbelastning                        | 1,000     |
| holiday större helg                          | 1 ingen större helg                     |           |
|                                              | 2 större helg (påsk/midsommar/julonyår) |           |

## Categorical Variables Codings

|                                              |                                         | Parameter |
|----------------------------------------------|-----------------------------------------|-----------|
|                                              |                                         | (3)       |
|                                              | 502300005                               | ,000      |
|                                              | 502300006                               | ,000      |
|                                              | 502300007                               | ,000      |
|                                              | 502300214                               | ,000      |
|                                              | 502300411                               | ,000      |
|                                              | 502300415                               | ,000      |
|                                              | 502300416                               | ,000      |
|                                              | 502300811                               | ,000      |
|                                              | 502300913                               | ,000      |
| weekday veckodag                             | 1 måndag                                | ,000      |
|                                              | 2 tisdag                                | ,000      |
|                                              | 3 onsdag                                | ,000      |
|                                              | 4 torsdag                               | 1,000     |
|                                              | 5 fredag                                | ,000      |
|                                              | 6 lördag                                | ,000      |
|                                              | 7 söndag                                | ,000      |
| season säsong/period                         | 1 januari-mars                          | ,000      |
|                                              | 2 april-maj                             | ,000      |
|                                              | 3 juni-augusti                          | ,000      |
|                                              | 4 september-oktober                     | 1,000     |
|                                              | 5 november-december                     | ,000      |
| bv3 belasnting vs paoncil dubbla intervallet | 1 medelbelastning                       |           |
|                                              | 2 underbelastning                       |           |
|                                              | 3 överbelastning                        |           |
| holiday större helg                          | 1 ingen större helg                     |           |
|                                              | 2 större helg (påsk/midsommar/julonyår) |           |

## Categorical Variables Codings

|                                              |                                         | Parameter |
|----------------------------------------------|-----------------------------------------|-----------|
|                                              |                                         | (4)       |
|                                              | 502300005                               | ,000      |
|                                              | 502300006                               | ,000      |
|                                              | 502300007                               | ,000      |
|                                              | 502300214                               | ,000      |
|                                              | 502300411                               | ,000      |
|                                              | 502300415                               | ,000      |
|                                              | 502300416                               | ,000      |
|                                              | 502300811                               | ,000      |
|                                              | 502300913                               | ,000      |
| weekday veckodag                             | 1 måndag                                | ,000      |
|                                              | 2 tisdag                                | ,000      |
|                                              | 3 onsdag                                | ,000      |
|                                              | 4 torsdag                               | ,000      |
|                                              | 5 fredag                                | 1,000     |
|                                              | 6 lördag                                | ,000      |
|                                              | 7 söndag                                | ,000      |
| season säsong/period                         | 1 januari-mars                          | ,000      |
|                                              | 2 april-maj                             | ,000      |
|                                              | 3 juni-augusti                          | ,000      |
|                                              | 4 september-oktober                     | ,000      |
|                                              | 5 november-december                     | 1,000     |
| bv3 belasnting vs paoncil dubbla intervallet | 1 medelbelastning                       |           |
|                                              | 2 underbelastning                       |           |
|                                              | 3 överbelastning                        |           |
| holiday större helg                          | 1 ingen större helg                     |           |
|                                              | 2 större helg (påsk/midsommar/julonyår) |           |

## Categorical Variables Codings

|                                              |                                         | Parameter |
|----------------------------------------------|-----------------------------------------|-----------|
|                                              |                                         | (5)       |
|                                              | 502300005                               | ,000      |
|                                              | 502300006                               | ,000      |
|                                              | 502300007                               | ,000      |
|                                              | 502300214                               | ,000      |
|                                              | 502300411                               | ,000      |
|                                              | 502300415                               | ,000      |
|                                              | 502300416                               | ,000      |
|                                              | 502300811                               | ,000      |
|                                              | 502300913                               | ,000      |
| weekday veckodag                             | 1 måndag                                | ,000      |
|                                              | 2 tisdag                                | ,000      |
|                                              | 3 onsdag                                | ,000      |
|                                              | 4 torsdag                               | ,000      |
|                                              | 5 fredag                                | ,000      |
|                                              | 6 lördag                                | 1,000     |
|                                              | 7 söndag                                | ,000      |
| season säsong/period                         | 1 januari-mars                          |           |
|                                              | 2 april-maj                             |           |
|                                              | 3 juni-augusti                          |           |
|                                              | 4 september-oktober                     |           |
|                                              | 5 november-december                     |           |
| bv3 belasnting vs paoncil dubbla intervallet | 1 medelbelastning                       |           |
|                                              | 2 underbelastning                       |           |
|                                              | 3 överbelastning                        |           |
| holiday större helg                          | 1 ingen större helg                     |           |
|                                              | 2 större helg (påsk/midsommar/julonyår) |           |



## Categorical Variables Codings

|                                              |                                         | Parameter |
|----------------------------------------------|-----------------------------------------|-----------|
|                                              |                                         | (6)       |
|                                              | 502300005                               | ,000      |
|                                              | 502300006                               | ,000      |
|                                              | 502300007                               | ,000      |
|                                              | 502300214                               | ,000      |
|                                              | 502300411                               | ,000      |
|                                              | 502300415                               | ,000      |
|                                              | 502300416                               | ,000      |
|                                              | 502300811                               | ,000      |
|                                              | 502300913                               | ,000      |
| weekday veckodag                             | 1 måndag                                | ,000      |
|                                              | 2 tisdag                                | ,000      |
|                                              | 3 onsdag                                | ,000      |
|                                              | 4 torsdag                               | ,000      |
|                                              | 5 fredag                                | ,000      |
|                                              | 6 lördag                                | ,000      |
|                                              | 7 söndag                                | 1,000     |
| season säsong/period                         | 1 januari-mars                          |           |
|                                              | 2 april-maj                             |           |
|                                              | 3 juni-augusti                          |           |
|                                              | 4 september-oktober                     |           |
|                                              | 5 november-december                     |           |
| bv3 belasnting vs paoncil dubbla intervallet | 1 medelbelastning                       |           |
|                                              | 2 underbelastning                       |           |
|                                              | 3 överbelastning                        |           |
| holiday större helg                          | 1 ingen större helg                     |           |
|                                              | 2 större helg (påsk/midsommar/julonyår) |           |

## Categorical Variables Codings

|                                              |                                         | Parameter |
|----------------------------------------------|-----------------------------------------|-----------|
|                                              |                                         | (7)       |
|                                              | 502300005                               | ,000      |
|                                              | 502300006                               | ,000      |
|                                              | 502300007                               | ,000      |
|                                              | 502300214                               | ,000      |
|                                              | 502300411                               | ,000      |
|                                              | 502300415                               | ,000      |
|                                              | 502300416                               | ,000      |
|                                              | 502300811                               | ,000      |
|                                              | 502300913                               | ,000      |
| weekday veckodag                             | 1 måndag                                |           |
|                                              | 2 tisdag                                |           |
|                                              | 3 onsdag                                |           |
|                                              | 4 torsdag                               |           |
|                                              | 5 fredag                                |           |
|                                              | 6 lördag                                |           |
|                                              | 7 söndag                                |           |
| season säsong/period                         | 1 januari-mars                          |           |
|                                              | 2 april-maj                             |           |
|                                              | 3 juni-augusti                          |           |
|                                              | 4 september-oktober                     |           |
|                                              | 5 november-december                     |           |
| bv3 belastning vs paoncil dubbla intervallet | 1 medelbelastning                       |           |
|                                              | 2 underbelastning                       |           |
|                                              | 3 överbelastning                        |           |
| holiday större helg                          | 1 ingen större helg                     |           |
|                                              | 2 större helg (påsk/midsommar/julonyår) |           |

## Categorical Variables Codings

|                                              |                                         | Parameter |
|----------------------------------------------|-----------------------------------------|-----------|
|                                              |                                         | (8)       |
|                                              | 502300005                               | ,000      |
|                                              | 502300006                               | ,000      |
|                                              | 502300007                               | ,000      |
|                                              | 502300214                               | ,000      |
|                                              | 502300411                               | ,000      |
|                                              | 502300415                               | ,000      |
|                                              | 502300416                               | ,000      |
|                                              | 502300811                               | ,000      |
|                                              | 502300913                               | ,000      |
| weekday veckodag                             | 1 måndag                                |           |
|                                              | 2 tisdag                                |           |
|                                              | 3 onsdag                                |           |
|                                              | 4 torsdag                               |           |
|                                              | 5 fredag                                |           |
|                                              | 6 lördag                                |           |
|                                              | 7 söndag                                |           |
| season säsong/period                         | 1 januari-mars                          |           |
|                                              | 2 april-maj                             |           |
|                                              | 3 juni-augusti                          |           |
|                                              | 4 september-oktober                     |           |
|                                              | 5 november-december                     |           |
| bv3 belasnting vs paoncil dubbla intervallet | 1 medelbelastning                       |           |
|                                              | 2 underbelastning                       |           |
|                                              | 3 överbelastning                        |           |
| holiday större helg                          | 1 ingen större helg                     |           |
|                                              | 2 större helg (påsk/midsommar/julonyår) |           |

## Categorical Variables Codings

|                                              |                                         | Parameter |
|----------------------------------------------|-----------------------------------------|-----------|
|                                              |                                         | (9)       |
|                                              | 502300005                               | ,000      |
|                                              | 502300006                               | ,000      |
|                                              | 502300007                               | ,000      |
|                                              | 502300214                               | ,000      |
|                                              | 502300411                               | ,000      |
|                                              | 502300415                               | ,000      |
|                                              | 502300416                               | ,000      |
|                                              | 502300811                               | ,000      |
|                                              | 502300913                               | ,000      |
| weekday veckodag                             | 1 måndag                                |           |
|                                              | 2 tisdag                                |           |
|                                              | 3 onsdag                                |           |
|                                              | 4 torsdag                               |           |
|                                              | 5 fredag                                |           |
|                                              | 6 lördag                                |           |
|                                              | 7 söndag                                |           |
| season säsong/period                         | 1 januari-mars                          |           |
|                                              | 2 april-maj                             |           |
|                                              | 3 juni-augusti                          |           |
|                                              | 4 september-oktober                     |           |
|                                              | 5 november-december                     |           |
| bv3 belasnting vs paoncil dubbla intervallet | 1 medelbelastning                       |           |
|                                              | 2 underbelastning                       |           |
|                                              | 3 överbelastning                        |           |
| holiday större helg                          | 1 ingen större helg                     |           |
|                                              | 2 större helg (påsk/midsommar/julonyår) |           |

## Categorical Variables Codings

|                                              |                                         | Parameter |
|----------------------------------------------|-----------------------------------------|-----------|
|                                              |                                         | (10)      |
|                                              | 502300005                               | ,000      |
|                                              | 502300006                               | ,000      |
|                                              | 502300007                               | ,000      |
|                                              | 502300214                               | ,000      |
|                                              | 502300411                               | ,000      |
|                                              | 502300415                               | ,000      |
|                                              | 502300416                               | ,000      |
|                                              | 502300811                               | ,000      |
|                                              | 502300913                               | ,000      |
| weekday veckodag                             | 1 måndag                                |           |
|                                              | 2 tisdag                                |           |
|                                              | 3 onsdag                                |           |
|                                              | 4 torsdag                               |           |
|                                              | 5 fredag                                |           |
|                                              | 6 lördag                                |           |
|                                              | 7 söndag                                |           |
| season säsong/period                         | 1 januari-mars                          |           |
|                                              | 2 april-maj                             |           |
|                                              | 3 juni-augusti                          |           |
|                                              | 4 september-oktober                     |           |
|                                              | 5 november-december                     |           |
| bv3 belasnting vs paoncil dubbla intervallet | 1 medelbelastning                       |           |
|                                              | 2 underbelastning                       |           |
|                                              | 3 överbelastning                        |           |
| holiday större helg                          | 1 ingen större helg                     |           |
|                                              | 2 större helg (påsk/midsommar/julonyår) |           |

## Categorical Variables Codings

|                                              |                                         | Parameter |
|----------------------------------------------|-----------------------------------------|-----------|
|                                              |                                         | (11)      |
|                                              | 502300005                               | ,000      |
|                                              | 502300006                               | ,000      |
|                                              | 502300007                               | ,000      |
|                                              | 502300214                               | ,000      |
|                                              | 502300411                               | ,000      |
|                                              | 502300415                               | ,000      |
|                                              | 502300416                               | ,000      |
|                                              | 502300811                               | ,000      |
|                                              | 502300913                               | ,000      |
| weekday veckodag                             | 1 måndag                                |           |
|                                              | 2 tisdag                                |           |
|                                              | 3 onsdag                                |           |
|                                              | 4 torsdag                               |           |
|                                              | 5 fredag                                |           |
|                                              | 6 lördag                                |           |
|                                              | 7 söndag                                |           |
| season säsong/period                         | 1 januari-mars                          |           |
|                                              | 2 april-maj                             |           |
|                                              | 3 juni-augusti                          |           |
|                                              | 4 september-oktober                     |           |
|                                              | 5 november-december                     |           |
| bv3 belasnting vs paoncil dubbla intervallet | 1 medelbelastning                       |           |
|                                              | 2 underbelastning                       |           |
|                                              | 3 överbelastning                        |           |
| holiday större helg                          | 1 ingen större helg                     |           |
|                                              | 2 större helg (påsk/midsommar/julonyår) |           |

## Categorical Variables Codings

|                                              |                                         | Parameter |
|----------------------------------------------|-----------------------------------------|-----------|
|                                              |                                         | (12)      |
|                                              | 502300005                               | ,000      |
|                                              | 502300006                               | ,000      |
|                                              | 502300007                               | ,000      |
|                                              | 502300214                               | ,000      |
|                                              | 502300411                               | ,000      |
|                                              | 502300415                               | ,000      |
|                                              | 502300416                               | ,000      |
|                                              | 502300811                               | ,000      |
|                                              | 502300913                               | ,000      |
| weekday veckodag                             | 1 måndag                                |           |
|                                              | 2 tisdag                                |           |
|                                              | 3 onsdag                                |           |
|                                              | 4 torsdag                               |           |
|                                              | 5 fredag                                |           |
|                                              | 6 lördag                                |           |
|                                              | 7 söndag                                |           |
| season säsong/period                         | 1 januari-mars                          |           |
|                                              | 2 april-maj                             |           |
|                                              | 3 juni-augusti                          |           |
|                                              | 4 september-oktober                     |           |
|                                              | 5 november-december                     |           |
| bv3 belasnting vs paoncil dubbla intervallet | 1 medelbelastning                       |           |
|                                              | 2 underbelastning                       |           |
|                                              | 3 överbelastning                        |           |
| holiday större helg                          | 1 ingen större helg                     |           |
|                                              | 2 större helg (påsk/midsommar/julonyår) |           |

## Categorical Variables Codings

|                                              |                                         | Parameter |
|----------------------------------------------|-----------------------------------------|-----------|
|                                              |                                         | (13)      |
|                                              | 502300005                               | ,000      |
|                                              | 502300006                               | ,000      |
|                                              | 502300007                               | ,000      |
|                                              | 502300214                               | ,000      |
|                                              | 502300411                               | ,000      |
|                                              | 502300415                               | ,000      |
|                                              | 502300416                               | ,000      |
|                                              | 502300811                               | ,000      |
|                                              | 502300913                               | ,000      |
| weekday veckodag                             | 1 måndag                                |           |
|                                              | 2 tisdag                                |           |
|                                              | 3 onsdag                                |           |
|                                              | 4 torsdag                               |           |
|                                              | 5 fredag                                |           |
|                                              | 6 lördag                                |           |
|                                              | 7 söndag                                |           |
| season säsong/period                         | 1 januari-mars                          |           |
|                                              | 2 april-maj                             |           |
|                                              | 3 juni-augusti                          |           |
|                                              | 4 september-oktober                     |           |
|                                              | 5 november-december                     |           |
| bv3 belasnting vs paoncil dubbla intervallet | 1 medelbelastning                       |           |
|                                              | 2 underbelastning                       |           |
|                                              | 3 överbelastning                        |           |
| holiday större helg                          | 1 ingen större helg                     |           |
|                                              | 2 större helg (påsk/midsommar/julonyår) |           |



## Categorical Variables Codings

|                                              |                                         | Parameter |
|----------------------------------------------|-----------------------------------------|-----------|
|                                              |                                         | (14)      |
|                                              | 502300005                               | ,000      |
|                                              | 502300006                               | ,000      |
|                                              | 502300007                               | ,000      |
|                                              | 502300214                               | ,000      |
|                                              | 502300411                               | ,000      |
|                                              | 502300415                               | ,000      |
|                                              | 502300416                               | ,000      |
|                                              | 502300811                               | ,000      |
|                                              | 502300913                               | ,000      |
| weekday veckodag                             | 1 måndag                                |           |
|                                              | 2 tisdag                                |           |
|                                              | 3 onsdag                                |           |
|                                              | 4 torsdag                               |           |
|                                              | 5 fredag                                |           |
|                                              | 6 lördag                                |           |
|                                              | 7 söndag                                |           |
| season säsong/period                         | 1 januari-mars                          |           |
|                                              | 2 april-maj                             |           |
|                                              | 3 juni-augusti                          |           |
|                                              | 4 september-oktober                     |           |
|                                              | 5 november-december                     |           |
| bv3 belasnting vs paoncil dubbla intervallet | 1 medelbelastning                       |           |
|                                              | 2 underbelastning                       |           |
|                                              | 3 överbelastning                        |           |
| holiday större helg                          | 1 ingen större helg                     |           |
|                                              | 2 större helg (påsk/midsommar/julonyår) |           |

## Categorical Variables Codings

|                                              |                                         | Parameter |
|----------------------------------------------|-----------------------------------------|-----------|
|                                              |                                         | (15)      |
|                                              | 502300005                               | ,000      |
|                                              | 502300006                               | ,000      |
|                                              | 502300007                               | ,000      |
|                                              | 502300214                               | ,000      |
|                                              | 502300411                               | ,000      |
|                                              | 502300415                               | ,000      |
|                                              | 502300416                               | ,000      |
|                                              | 502300811                               | ,000      |
|                                              | 502300913                               | ,000      |
| weekday veckodag                             | 1 måndag                                |           |
|                                              | 2 tisdag                                |           |
|                                              | 3 onsdag                                |           |
|                                              | 4 torsdag                               |           |
|                                              | 5 fredag                                |           |
|                                              | 6 lördag                                |           |
|                                              | 7 söndag                                |           |
| season säsong/period                         | 1 januari-mars                          |           |
|                                              | 2 april-maj                             |           |
|                                              | 3 juni-augusti                          |           |
|                                              | 4 september-oktober                     |           |
|                                              | 5 november-december                     |           |
| bv3 belasnting vs paoncil dubbla intervallet | 1 medelbelastning                       |           |
|                                              | 2 underbelastning                       |           |
|                                              | 3 överbelastning                        |           |
| holiday större helg                          | 1 ingen större helg                     |           |
|                                              | 2 större helg (påsk/midsommar/julonyår) |           |

## Categorical Variables Codings

|                                              |                                         | Parameter |
|----------------------------------------------|-----------------------------------------|-----------|
|                                              |                                         | (16)      |
|                                              | 502300005                               | ,000      |
|                                              | 502300006                               | ,000      |
|                                              | 502300007                               | ,000      |
|                                              | 502300214                               | ,000      |
|                                              | 502300411                               | ,000      |
|                                              | 502300415                               | ,000      |
|                                              | 502300416                               | ,000      |
|                                              | 502300811                               | ,000      |
|                                              | 502300913                               | ,000      |
| weekday veckodag                             | 1 måndag                                |           |
|                                              | 2 tisdag                                |           |
|                                              | 3 onsdag                                |           |
|                                              | 4 torsdag                               |           |
|                                              | 5 fredag                                |           |
|                                              | 6 lördag                                |           |
|                                              | 7 söndag                                |           |
| season säsong/period                         | 1 januari-mars                          |           |
|                                              | 2 april-maj                             |           |
|                                              | 3 juni-augusti                          |           |
|                                              | 4 september-oktober                     |           |
|                                              | 5 november-december                     |           |
| bv3 belasnting vs paoncil dubbla intervallet | 1 medelbelastning                       |           |
|                                              | 2 underbelastning                       |           |
|                                              | 3 överbelastning                        |           |
| holiday större helg                          | 1 ingen större helg                     |           |
|                                              | 2 större helg (påsk/midsommar/julonyår) |           |

## Categorical Variables Codings

|                                              |                                         | Parameter |
|----------------------------------------------|-----------------------------------------|-----------|
|                                              |                                         | (17)      |
|                                              | 502300005                               | ,000      |
|                                              | 502300006                               | ,000      |
|                                              | 502300007                               | ,000      |
|                                              | 502300214                               | ,000      |
|                                              | 502300411                               | ,000      |
|                                              | 502300415                               | ,000      |
|                                              | 502300416                               | ,000      |
|                                              | 502300811                               | ,000      |
|                                              | 502300913                               | ,000      |
| weekday veckodag                             | 1 måndag                                |           |
|                                              | 2 tisdag                                |           |
|                                              | 3 onsdag                                |           |
|                                              | 4 torsdag                               |           |
|                                              | 5 fredag                                |           |
|                                              | 6 lördag                                |           |
|                                              | 7 söndag                                |           |
| season säsong/period                         | 1 januari-mars                          |           |
|                                              | 2 april-maj                             |           |
|                                              | 3 juni-augusti                          |           |
|                                              | 4 september-oktober                     |           |
|                                              | 5 november-december                     |           |
| bv3 belasnting vs paoncil dubbla intervallet | 1 medelbelastning                       |           |
|                                              | 2 underbelastning                       |           |
|                                              | 3 överbelastning                        |           |
| holiday större helg                          | 1 ingen större helg                     |           |
|                                              | 2 större helg (påsk/midsommar/julonyår) |           |

## Categorical Variables Codings

|                                              |                                         | Parameter |
|----------------------------------------------|-----------------------------------------|-----------|
|                                              |                                         | (18)      |
|                                              | 502300005                               | ,000      |
|                                              | 502300006                               | ,000      |
|                                              | 502300007                               | ,000      |
|                                              | 502300214                               | ,000      |
|                                              | 502300411                               | ,000      |
|                                              | 502300415                               | ,000      |
|                                              | 502300416                               | ,000      |
|                                              | 502300811                               | ,000      |
|                                              | 502300913                               | ,000      |
| weekday veckodag                             | 1 måndag                                |           |
|                                              | 2 tisdag                                |           |
|                                              | 3 onsdag                                |           |
|                                              | 4 torsdag                               |           |
|                                              | 5 fredag                                |           |
|                                              | 6 lördag                                |           |
|                                              | 7 söndag                                |           |
| season säsong/period                         | 1 januari-mars                          |           |
|                                              | 2 april-maj                             |           |
|                                              | 3 juni-augusti                          |           |
|                                              | 4 september-oktober                     |           |
|                                              | 5 november-december                     |           |
| bv3 belasnting vs paoncil dubbla intervallet | 1 medelbelastning                       |           |
|                                              | 2 underbelastning                       |           |
|                                              | 3 överbelastning                        |           |
| holiday större helg                          | 1 ingen större helg                     |           |
|                                              | 2 större helg (påsk/midsommar/julonyår) |           |

## Categorical Variables Codings

|                                              |                                         | Parameter |
|----------------------------------------------|-----------------------------------------|-----------|
|                                              |                                         | (19)      |
|                                              | 502300005                               | ,000      |
|                                              | 502300006                               | ,000      |
|                                              | 502300007                               | ,000      |
|                                              | 502300214                               | ,000      |
|                                              | 502300411                               | ,000      |
|                                              | 502300415                               | ,000      |
|                                              | 502300416                               | ,000      |
|                                              | 502300811                               | ,000      |
|                                              | 502300913                               | ,000      |
| weekday veckodag                             | 1 måndag                                |           |
|                                              | 2 tisdag                                |           |
|                                              | 3 onsdag                                |           |
|                                              | 4 torsdag                               |           |
|                                              | 5 fredag                                |           |
|                                              | 6 lördag                                |           |
|                                              | 7 söndag                                |           |
| season säsong/period                         | 1 januari-mars                          |           |
|                                              | 2 april-maj                             |           |
|                                              | 3 juni-augusti                          |           |
|                                              | 4 september-oktober                     |           |
|                                              | 5 november-december                     |           |
| bv3 belasnting vs paoncil dubbla intervallet | 1 medelbelastning                       |           |
|                                              | 2 underbelastning                       |           |
|                                              | 3 överbelastning                        |           |
| holiday större helg                          | 1 ingen större helg                     |           |
|                                              | 2 större helg (påsk/midsommar/julonyår) |           |

## Categorical Variables Codings

|                                              |                                         | Parameter |
|----------------------------------------------|-----------------------------------------|-----------|
|                                              |                                         | (20)      |
|                                              | 502300005                               | ,000      |
|                                              | 502300006                               | ,000      |
|                                              | 502300007                               | ,000      |
|                                              | 502300214                               | ,000      |
|                                              | 502300411                               | ,000      |
|                                              | 502300415                               | ,000      |
|                                              | 502300416                               | ,000      |
|                                              | 502300811                               | ,000      |
|                                              | 502300913                               | ,000      |
| weekday veckodag                             | 1 måndag                                |           |
|                                              | 2 tisdag                                |           |
|                                              | 3 onsdag                                |           |
|                                              | 4 torsdag                               |           |
|                                              | 5 fredag                                |           |
|                                              | 6 lördag                                |           |
|                                              | 7 söndag                                |           |
| season säsong/period                         | 1 januari-mars                          |           |
|                                              | 2 april-maj                             |           |
|                                              | 3 juni-augusti                          |           |
|                                              | 4 september-oktober                     |           |
|                                              | 5 november-december                     |           |
| bv3 belasnting vs paoncil dubbla intervallet | 1 medelbelastning                       |           |
|                                              | 2 underbelastning                       |           |
|                                              | 3 överbelastning                        |           |
| holiday större helg                          | 1 ingen större helg                     |           |
|                                              | 2 större helg (påsk/midsommar/julonyår) |           |

## Categorical Variables Codings

|                                              |                                         | Parameter |
|----------------------------------------------|-----------------------------------------|-----------|
|                                              |                                         | (21)      |
|                                              | 502300005                               | ,000      |
|                                              | 502300006                               | ,000      |
|                                              | 502300007                               | ,000      |
|                                              | 502300214                               | ,000      |
|                                              | 502300411                               | ,000      |
|                                              | 502300415                               | ,000      |
|                                              | 502300416                               | ,000      |
|                                              | 502300811                               | ,000      |
|                                              | 502300913                               | ,000      |
| weekday veckodag                             | 1 måndag                                |           |
|                                              | 2 tisdag                                |           |
|                                              | 3 onsdag                                |           |
|                                              | 4 torsdag                               |           |
|                                              | 5 fredag                                |           |
|                                              | 6 lördag                                |           |
|                                              | 7 söndag                                |           |
| season säsong/period                         | 1 januari-mars                          |           |
|                                              | 2 april-maj                             |           |
|                                              | 3 juni-augusti                          |           |
|                                              | 4 september-oktober                     |           |
|                                              | 5 november-december                     |           |
| bv3 belasnting vs paoncil dubbla intervallet | 1 medelbelastning                       |           |
|                                              | 2 underbelastning                       |           |
|                                              | 3 överbelastning                        |           |
| holiday större helg                          | 1 ingen större helg                     |           |
|                                              | 2 större helg (påsk/midsommar/julonyår) |           |



## Categorical Variables Codings

|                                              |                                         | Parameter |
|----------------------------------------------|-----------------------------------------|-----------|
|                                              |                                         | (22)      |
|                                              | 502300005                               | ,000      |
|                                              | 502300006                               | ,000      |
|                                              | 502300007                               | ,000      |
|                                              | 502300214                               | ,000      |
|                                              | 502300411                               | ,000      |
|                                              | 502300415                               | ,000      |
|                                              | 502300416                               | ,000      |
|                                              | 502300811                               | ,000      |
|                                              | 502300913                               | ,000      |
| weekday veckodag                             | 1 måndag                                |           |
|                                              | 2 tisdag                                |           |
|                                              | 3 onsdag                                |           |
|                                              | 4 torsdag                               |           |
|                                              | 5 fredag                                |           |
|                                              | 6 lördag                                |           |
|                                              | 7 söndag                                |           |
| season säsong/period                         | 1 januari-mars                          |           |
|                                              | 2 april-maj                             |           |
|                                              | 3 juni-augusti                          |           |
|                                              | 4 september-oktober                     |           |
|                                              | 5 november-december                     |           |
| bv3 belasnting vs paoncil dubbla intervallet | 1 medelbelastning                       |           |
|                                              | 2 underbelastning                       |           |
|                                              | 3 överbelastning                        |           |
| holiday större helg                          | 1 ingen större helg                     |           |
|                                              | 2 större helg (påsk/midsommar/julonyår) |           |

## Categorical Variables Codings

|                                              |                                         | Parameter |
|----------------------------------------------|-----------------------------------------|-----------|
|                                              |                                         | (23)      |
|                                              | 502300005                               | ,000      |
|                                              | 502300006                               | ,000      |
|                                              | 502300007                               | ,000      |
|                                              | 502300214                               | ,000      |
|                                              | 502300411                               | ,000      |
|                                              | 502300415                               | ,000      |
|                                              | 502300416                               | ,000      |
|                                              | 502300811                               | ,000      |
|                                              | 502300913                               | ,000      |
| weekday veckodag                             | 1 måndag                                |           |
|                                              | 2 tisdag                                |           |
|                                              | 3 onsdag                                |           |
|                                              | 4 torsdag                               |           |
|                                              | 5 fredag                                |           |
|                                              | 6 lördag                                |           |
|                                              | 7 söndag                                |           |
| season säsong/period                         | 1 januari-mars                          |           |
|                                              | 2 april-maj                             |           |
|                                              | 3 juni-augusti                          |           |
|                                              | 4 september-oktober                     |           |
|                                              | 5 november-december                     |           |
| bv3 belasnting vs paoncil dubbla intervallet | 1 medelbelastning                       |           |
|                                              | 2 underbelastning                       |           |
|                                              | 3 överbelastning                        |           |
| holiday större helg                          | 1 ingen större helg                     |           |
|                                              | 2 större helg (påsk/midsommar/julonyår) |           |

## Categorical Variables Codings

|                                              |                                         | Parameter |
|----------------------------------------------|-----------------------------------------|-----------|
|                                              |                                         | (24)      |
|                                              | 502300005                               | ,000      |
|                                              | 502300006                               | ,000      |
|                                              | 502300007                               | ,000      |
|                                              | 502300214                               | ,000      |
|                                              | 502300411                               | ,000      |
|                                              | 502300415                               | ,000      |
|                                              | 502300416                               | ,000      |
|                                              | 502300811                               | ,000      |
|                                              | 502300913                               | ,000      |
| weekday veckodag                             | 1 måndag                                |           |
|                                              | 2 tisdag                                |           |
|                                              | 3 onsdag                                |           |
|                                              | 4 torsdag                               |           |
|                                              | 5 fredag                                |           |
|                                              | 6 lördag                                |           |
|                                              | 7 söndag                                |           |
| season säsong/period                         | 1 januari-mars                          |           |
|                                              | 2 april-maj                             |           |
|                                              | 3 juni-augusti                          |           |
|                                              | 4 september-oktober                     |           |
|                                              | 5 november-december                     |           |
| bv3 belasnting vs paoncil dubbla intervallet | 1 medelbelastning                       |           |
|                                              | 2 underbelastning                       |           |
|                                              | 3 överbelastning                        |           |
| holiday större helg                          | 1 ingen större helg                     |           |
|                                              | 2 större helg (påsk/midsommar/julonyår) |           |

## Categorical Variables Codings

|                                              |                                         | Parameter |
|----------------------------------------------|-----------------------------------------|-----------|
|                                              |                                         | (25)      |
|                                              | 502300005                               | ,000      |
|                                              | 502300006                               | ,000      |
|                                              | 502300007                               | ,000      |
|                                              | 502300214                               | ,000      |
|                                              | 502300411                               | ,000      |
|                                              | 502300415                               | ,000      |
|                                              | 502300416                               | ,000      |
|                                              | 502300811                               | ,000      |
|                                              | 502300913                               | ,000      |
| weekday veckodag                             | 1 måndag                                |           |
|                                              | 2 tisdag                                |           |
|                                              | 3 onsdag                                |           |
|                                              | 4 torsdag                               |           |
|                                              | 5 fredag                                |           |
|                                              | 6 lördag                                |           |
|                                              | 7 söndag                                |           |
| season säsong/period                         | 1 januari-mars                          |           |
|                                              | 2 april-maj                             |           |
|                                              | 3 juni-augusti                          |           |
|                                              | 4 september-oktober                     |           |
|                                              | 5 november-december                     |           |
| bv3 belastning vs paoncil dubbla intervallet | 1 medelbelastning                       |           |
|                                              | 2 underbelastning                       |           |
|                                              | 3 överbelastning                        |           |
| holiday större helg                          | 1 ingen större helg                     |           |
|                                              | 2 större helg (påsk/midsommar/julonyår) |           |

## Categorical Variables Codings

|                                              |                                         | Parameter |
|----------------------------------------------|-----------------------------------------|-----------|
|                                              |                                         | (26)      |
|                                              | 502300005                               | ,000      |
|                                              | 502300006                               | ,000      |
|                                              | 502300007                               | ,000      |
|                                              | 502300214                               | ,000      |
|                                              | 502300411                               | ,000      |
|                                              | 502300415                               | ,000      |
|                                              | 502300416                               | ,000      |
|                                              | 502300811                               | ,000      |
|                                              | 502300913                               | ,000      |
| weekday veckodag                             | 1 måndag                                |           |
|                                              | 2 tisdag                                |           |
|                                              | 3 onsdag                                |           |
|                                              | 4 torsdag                               |           |
|                                              | 5 fredag                                |           |
|                                              | 6 lördag                                |           |
|                                              | 7 söndag                                |           |
| season säsong/period                         | 1 januari-mars                          |           |
|                                              | 2 april-maj                             |           |
|                                              | 3 juni-augusti                          |           |
|                                              | 4 september-oktober                     |           |
|                                              | 5 november-december                     |           |
| bv3 belasnting vs paoncil dubbla intervallet | 1 medelbelastning                       |           |
|                                              | 2 underbelastning                       |           |
|                                              | 3 överbelastning                        |           |
| holiday större helg                          | 1 ingen större helg                     |           |
|                                              | 2 större helg (påsk/midsommar/julonyår) |           |

## Categorical Variables Codings

|                                              |                                         | Parameter |
|----------------------------------------------|-----------------------------------------|-----------|
|                                              |                                         | (27)      |
|                                              | 502300005                               | 1,000     |
|                                              | 502300006                               | ,000      |
|                                              | 502300007                               | ,000      |
|                                              | 502300214                               | ,000      |
|                                              | 502300411                               | ,000      |
|                                              | 502300415                               | ,000      |
|                                              | 502300416                               | ,000      |
|                                              | 502300811                               | ,000      |
|                                              | 502300913                               | ,000      |
| weekday veckodag                             | 1 måndag                                |           |
|                                              | 2 tisdag                                |           |
|                                              | 3 onsdag                                |           |
|                                              | 4 torsdag                               |           |
|                                              | 5 fredag                                |           |
|                                              | 6 lördag                                |           |
|                                              | 7 söndag                                |           |
| season säsong/period                         | 1 januari-mars                          |           |
|                                              | 2 april-maj                             |           |
|                                              | 3 juni-augusti                          |           |
|                                              | 4 september-oktober                     |           |
|                                              | 5 november-december                     |           |
| bv3 belasnting vs paoncil dubbla intervallet | 1 medelbelastning                       |           |
|                                              | 2 underbelastning                       |           |
|                                              | 3 överbelastning                        |           |
| holiday större helg                          | 1 ingen större helg                     |           |
|                                              | 2 större helg (påsk/midsommar/julonyår) |           |

## Categorical Variables Codings

|                                              |                                         | Parameter |
|----------------------------------------------|-----------------------------------------|-----------|
|                                              |                                         | (28)      |
|                                              | 502300005                               | ,000      |
|                                              | 502300006                               | 1,000     |
|                                              | 502300007                               | ,000      |
|                                              | 502300214                               | ,000      |
|                                              | 502300411                               | ,000      |
|                                              | 502300415                               | ,000      |
|                                              | 502300416                               | ,000      |
|                                              | 502300811                               | ,000      |
|                                              | 502300913                               | ,000      |
| weekday veckodag                             | 1 måndag                                |           |
|                                              | 2 tisdag                                |           |
|                                              | 3 onsdag                                |           |
|                                              | 4 torsdag                               |           |
|                                              | 5 fredag                                |           |
|                                              | 6 lördag                                |           |
|                                              | 7 söndag                                |           |
| season säsong/period                         | 1 januari-mars                          |           |
|                                              | 2 april-maj                             |           |
|                                              | 3 juni-augusti                          |           |
|                                              | 4 september-oktober                     |           |
|                                              | 5 november-december                     |           |
| bv3 belasnting vs paoncil dubbla intervallet | 1 medelbelastning                       |           |
|                                              | 2 underbelastning                       |           |
|                                              | 3 överbelastning                        |           |
| holiday större helg                          | 1 ingen större helg                     |           |
|                                              | 2 större helg (påsk/midsommar/julonyår) |           |

## Categorical Variables Codings

|                                              |                                         | Parameter |
|----------------------------------------------|-----------------------------------------|-----------|
|                                              |                                         | (29)      |
|                                              | 502300005                               | ,000      |
|                                              | 502300006                               | ,000      |
|                                              | 502300007                               | 1,000     |
|                                              | 502300214                               | ,000      |
|                                              | 502300411                               | ,000      |
|                                              | 502300415                               | ,000      |
|                                              | 502300416                               | ,000      |
|                                              | 502300811                               | ,000      |
|                                              | 502300913                               | ,000      |
| weekday veckodag                             | 1 måndag                                |           |
|                                              | 2 tisdag                                |           |
|                                              | 3 onsdag                                |           |
|                                              | 4 torsdag                               |           |
|                                              | 5 fredag                                |           |
|                                              | 6 lördag                                |           |
|                                              | 7 söndag                                |           |
| season säsong/period                         | 1 januari-mars                          |           |
|                                              | 2 april-maj                             |           |
|                                              | 3 juni-augusti                          |           |
|                                              | 4 september-oktober                     |           |
|                                              | 5 november-december                     |           |
| bv3 belasnting vs paoncil dubbla intervallet | 1 medelbelastning                       |           |
|                                              | 2 underbelastning                       |           |
|                                              | 3 överbelastning                        |           |
| holiday större helg                          | 1 ingen större helg                     |           |
|                                              | 2 större helg (påsk/midsommar/julonyår) |           |



## Categorical Variables Codings

|                                              |                                         | Parameter |
|----------------------------------------------|-----------------------------------------|-----------|
|                                              |                                         | (30)      |
|                                              | 502300005                               | ,000      |
|                                              | 502300006                               | ,000      |
|                                              | 502300007                               | ,000      |
|                                              | 502300214                               | 1,000     |
|                                              | 502300411                               | ,000      |
|                                              | 502300415                               | ,000      |
|                                              | 502300416                               | ,000      |
|                                              | 502300811                               | ,000      |
|                                              | 502300913                               | ,000      |
| weekday veckodag                             | 1 måndag                                |           |
|                                              | 2 tisdag                                |           |
|                                              | 3 onsdag                                |           |
|                                              | 4 torsdag                               |           |
|                                              | 5 fredag                                |           |
|                                              | 6 lördag                                |           |
|                                              | 7 söndag                                |           |
| season säsong/period                         | 1 januari-mars                          |           |
|                                              | 2 april-maj                             |           |
|                                              | 3 juni-augusti                          |           |
|                                              | 4 september-oktober                     |           |
|                                              | 5 november-december                     |           |
| bv3 belasnting vs paoncil dubbla intervallet | 1 medelbelastning                       |           |
|                                              | 2 underbelastning                       |           |
|                                              | 3 överbelastning                        |           |
| holiday större helg                          | 1 ingen större helg                     |           |
|                                              | 2 större helg (påsk/midsommar/julonyår) |           |

## Categorical Variables Codings

|                                              |                                         | Parameter |
|----------------------------------------------|-----------------------------------------|-----------|
|                                              |                                         | (31)      |
|                                              | 502300005                               | ,000      |
|                                              | 502300006                               | ,000      |
|                                              | 502300007                               | ,000      |
|                                              | 502300214                               | ,000      |
|                                              | 502300411                               | 1,000     |
|                                              | 502300415                               | ,000      |
|                                              | 502300416                               | ,000      |
|                                              | 502300811                               | ,000      |
|                                              | 502300913                               | ,000      |
| weekday veckodag                             | 1 måndag                                |           |
|                                              | 2 tisdag                                |           |
|                                              | 3 onsdag                                |           |
|                                              | 4 torsdag                               |           |
|                                              | 5 fredag                                |           |
|                                              | 6 lördag                                |           |
|                                              | 7 söndag                                |           |
| season säsong/period                         | 1 januari-mars                          |           |
|                                              | 2 april-maj                             |           |
|                                              | 3 juni-augusti                          |           |
|                                              | 4 september-oktober                     |           |
|                                              | 5 november-december                     |           |
| bv3 belastning vs paoncil dubbla intervallet | 1 medelbelastning                       |           |
|                                              | 2 underbelastning                       |           |
|                                              | 3 överbelastning                        |           |
| holiday större helg                          | 1 ingen större helg                     |           |
|                                              | 2 större helg (påsk/midsommar/julonyår) |           |

## Categorical Variables Codings

|                                              |                                         | Parameter |
|----------------------------------------------|-----------------------------------------|-----------|
|                                              |                                         | (32)      |
|                                              | 502300005                               | ,000      |
|                                              | 502300006                               | ,000      |
|                                              | 502300007                               | ,000      |
|                                              | 502300214                               | ,000      |
|                                              | 502300411                               | ,000      |
|                                              | 502300415                               | 1,000     |
|                                              | 502300416                               | ,000      |
|                                              | 502300811                               | ,000      |
|                                              | 502300913                               | ,000      |
| weekday veckodag                             | 1 måndag                                |           |
|                                              | 2 tisdag                                |           |
|                                              | 3 onsdag                                |           |
|                                              | 4 torsdag                               |           |
|                                              | 5 fredag                                |           |
|                                              | 6 lördag                                |           |
|                                              | 7 söndag                                |           |
| season säsong/period                         | 1 januari-mars                          |           |
|                                              | 2 april-maj                             |           |
|                                              | 3 juni-augusti                          |           |
|                                              | 4 september-oktober                     |           |
|                                              | 5 november-december                     |           |
| bv3 belasnting vs paoncil dubbla intervallet | 1 medelbelastning                       |           |
|                                              | 2 underbelastning                       |           |
|                                              | 3 överbelastning                        |           |
| holiday större helg                          | 1 ingen större helg                     |           |
|                                              | 2 större helg (påsk/midsommar/julonyår) |           |

## Categorical Variables Codings

|                                              |                                         | Parameter |
|----------------------------------------------|-----------------------------------------|-----------|
|                                              |                                         | (33)      |
|                                              | 502300005                               | ,000      |
|                                              | 502300006                               | ,000      |
|                                              | 502300007                               | ,000      |
|                                              | 502300214                               | ,000      |
|                                              | 502300411                               | ,000      |
|                                              | 502300415                               | ,000      |
|                                              | 502300416                               | 1,000     |
|                                              | 502300811                               | ,000      |
|                                              | 502300913                               | ,000      |
| weekday veckodag                             | 1 måndag                                |           |
|                                              | 2 tisdag                                |           |
|                                              | 3 onsdag                                |           |
|                                              | 4 torsdag                               |           |
|                                              | 5 fredag                                |           |
|                                              | 6 lördag                                |           |
|                                              | 7 söndag                                |           |
| season säsong/period                         | 1 januari-mars                          |           |
|                                              | 2 april-maj                             |           |
|                                              | 3 juni-augusti                          |           |
|                                              | 4 september-oktober                     |           |
|                                              | 5 november-december                     |           |
| bv3 belasnting vs paoncil dubbla intervallet | 1 medelbelastning                       |           |
|                                              | 2 underbelastning                       |           |
|                                              | 3 överbelastning                        |           |
| holiday större helg                          | 1 ingen större helg                     |           |
|                                              | 2 större helg (påsk/midsommar/julonyår) |           |

## Categorical Variables Codings

|                                              |                                         | Parameter |
|----------------------------------------------|-----------------------------------------|-----------|
|                                              |                                         | (34)      |
|                                              | 502300005                               | ,000      |
|                                              | 502300006                               | ,000      |
|                                              | 502300007                               | ,000      |
|                                              | 502300214                               | ,000      |
|                                              | 502300411                               | ,000      |
|                                              | 502300415                               | ,000      |
|                                              | 502300416                               | ,000      |
|                                              | 502300811                               | 1,000     |
|                                              | 502300913                               | ,000      |
| weekday veckodag                             | 1 måndag                                |           |
|                                              | 2 tisdag                                |           |
|                                              | 3 onsdag                                |           |
|                                              | 4 torsdag                               |           |
|                                              | 5 fredag                                |           |
|                                              | 6 lördag                                |           |
|                                              | 7 söndag                                |           |
| season säsong/period                         | 1 januari-mars                          |           |
|                                              | 2 april-maj                             |           |
|                                              | 3 juni-augusti                          |           |
|                                              | 4 september-oktober                     |           |
|                                              | 5 november-december                     |           |
| bv3 belasnting vs paoncil dubbla intervallet | 1 medelbelastning                       |           |
|                                              | 2 underbelastning                       |           |
|                                              | 3 överbelastning                        |           |
| holiday större helg                          | 1 ingen större helg                     |           |
|                                              | 2 större helg (påsk/midsommar/julonyår) |           |

## Categorical Variables Codings

|                                              |                                         | Paramete... |
|----------------------------------------------|-----------------------------------------|-------------|
|                                              |                                         | (35)        |
|                                              | 502300005                               | ,000        |
|                                              | 502300006                               | ,000        |
|                                              | 502300007                               | ,000        |
|                                              | 502300214                               | ,000        |
|                                              | 502300411                               | ,000        |
|                                              | 502300415                               | ,000        |
|                                              | 502300416                               | ,000        |
|                                              | 502300811                               | ,000        |
|                                              | 502300913                               | 1,000       |
| weekday veckodag                             | 1 måndag                                |             |
|                                              | 2 tisdag                                |             |
|                                              | 3 onsdag                                |             |
|                                              | 4 torsdag                               |             |
|                                              | 5 fredag                                |             |
|                                              | 6 lördag                                |             |
|                                              | 7 söndag                                |             |
| season säsong/period                         | 1 januari-mars                          |             |
|                                              | 2 april-maj                             |             |
|                                              | 3 juni-augusti                          |             |
|                                              | 4 september-oktober                     |             |
|                                              | 5 november-december                     |             |
| bv3 belasnting vs paoncil dubbla intervallet | 1 medelbelastning                       |             |
|                                              | 2 underbelastning                       |             |
|                                              | 3 överbelastning                        |             |
| holiday större helg                          | 1 ingen större helg                     |             |
|                                              | 2 större helg (påsk/midsommar/julonyår) |             |

## Block 0: Beginning Block

Classification Table<sup>a,b</sup>

| Observed           |                                                |                                                              |
|--------------------|------------------------------------------------|--------------------------------------------------------------|
| Step 0             | luonnelt1 luonne highest = tapahtui potilaalle | 0 ingen händelse eller läheltä piti<br>1 tapahtui potilaalle |
| Overall Percentage |                                                |                                                              |

Classification Table<sup>a,b</sup>

| Observed           |                                                |                                     | Predicted                      |                                     |
|--------------------|------------------------------------------------|-------------------------------------|--------------------------------|-------------------------------------|
|                    |                                                |                                     | luonnelt1 luonne highest = ... | 0 ingen händelse eller läheltä piti |
| Step 0             | luonnelt1 luonne highest = tapahtui potilaalle | 0 ingen händelse eller läheltä piti | 11627                          |                                     |
|                    |                                                | 1 tapahtui potilaalle               | 848                            |                                     |
| Overall Percentage |                                                |                                     |                                |                                     |

Classification Table<sup>a,b</sup>

| Observed           |                                                |                                     | Predicted                    |                       |
|--------------------|------------------------------------------------|-------------------------------------|------------------------------|-----------------------|
|                    |                                                |                                     | luonnelt1 luonne highest ... | 1 tapahtui potilaalle |
| Step 0             | luonnelt1 luonne highest = tapahtui potilaalle | 0 ingen händelse eller läheltä piti | 0                            |                       |
|                    |                                                | 1 tapahtui potilaalle               | 0                            |                       |
| Overall Percentage |                                                |                                     |                              |                       |

Classification Table<sup>a,b</sup>

| Observed           |                                                |                                     | Predicted          |  |
|--------------------|------------------------------------------------|-------------------------------------|--------------------|--|
|                    |                                                |                                     | Percentage Correct |  |
| Step 0             | luonnelt1 luonne highest = tapahtui potilaalle | 0 ingen händelse eller läheltä piti | 100,0              |  |
|                    |                                                | 1 tapahtui potilaalle               | ,0                 |  |
| Overall Percentage |                                                |                                     | 93,2               |  |

a. Constant is included in the model.

b. The cut value is ,500

Variables in the Equation

|                 | B      | S.E. | Wald     | df | Sig. | Exp(B) |
|-----------------|--------|------|----------|----|------|--------|
| Step 0 Constant | -2,618 | ,036 | 5417,889 | 1  | ,000 | ,073   |

## Variables not in the Equation

|        |           |            | Score   | df | Sig. |
|--------|-----------|------------|---------|----|------|
| Step 0 | Variables | bv3        | 19,905  | 2  | ,000 |
|        |           | bv3(1)     | 15,719  | 1  | ,000 |
|        |           | bv3(2)     | 6,939   | 1  | ,008 |
|        |           | VASTY2     | 299,491 | 35 | ,000 |
|        |           | VASTY2(1)  | ,007    | 1  | ,934 |
|        |           | VASTY2(2)  | 8,968   | 1  | ,003 |
|        |           | VASTY2(3)  | 15,764  | 1  | ,000 |
|        |           | VASTY2(4)  | ,453    | 1  | ,501 |
|        |           | VASTY2(5)  | ,965    | 1  | ,326 |
|        |           | VASTY2(6)  | 14,062  | 1  | ,000 |
|        |           | VASTY2(7)  | 12,067  | 1  | ,001 |
|        |           | VASTY2(8)  | 1,504   | 1  | ,220 |
|        |           | VASTY2(9)  | 1,612   | 1  | ,204 |
|        |           | VASTY2(10) | 55,161  | 1  | ,000 |
|        |           | VASTY2(11) | 11,675  | 1  | ,001 |
|        |           | VASTY2(12) | ,213    | 1  | ,644 |
|        |           | VASTY2(13) | 55,161  | 1  | ,000 |
|        |           | VASTY2(14) | 1,504   | 1  | ,220 |
|        |           | VASTY2(15) | 1,199   | 1  | ,273 |
|        |           | VASTY2(16) | 3,222   | 1  | ,073 |
|        |           | VASTY2(17) | 12,590  | 1  | ,000 |
|        |           | VASTY2(18) | 7,137   | 1  | ,008 |
|        |           | VASTY2(19) | 19,294  | 1  | ,000 |
|        |           | VASTY2(20) | ,030    | 1  | ,863 |
|        |           | VASTY2(21) | ,647    | 1  | ,421 |
|        |           | VASTY2(22) | ,782    | 1  | ,377 |
|        |           | VASTY2(23) | 1,199   | 1  | ,273 |
|        |           | VASTY2(24) | 2,253   | 1  | ,133 |
|        |           | VASTY2(25) | 1,513   | 1  | ,219 |
|        |           | VASTY2(26) | 7,708   | 1  | ,005 |
|        |           | VASTY2(27) | 15,836  | 1  | ,000 |
|        |           | VASTY2(28) | 6,172   | 1  | ,013 |
|        |           | VASTY2(29) | 11,203  | 1  | ,001 |
|        |           | VASTY2(30) | 1,058   | 1  | ,304 |
|        |           | VASTY2(31) | 6,527   | 1  | ,011 |
|        |           | VASTY2(32) | ,544    | 1  | ,461 |
|        |           | VASTY2(33) | ,126    | 1  | ,723 |
|        |           | VASTY2(34) | 14,062  | 1  | ,000 |
|        |           | VASTY2(35) | 15,901  | 1  | ,000 |
|        |           | weekday    | 14,938  | 6  | ,021 |
|        |           | weekday(1) | ,984    | 1  | ,321 |
|        |           | weekday(2) | ,599    | 1  | ,439 |
|        |           | weekday(3) | ,376    | 1  | ,540 |



**Variables not in the Equation**

|                    | Score   | df | Sig. |
|--------------------|---------|----|------|
| weekday(4)         | 1,867   | 1  | ,172 |
| weekday(5)         | 3,400   | 1  | ,065 |
| weekday(6)         | 9,074   | 1  | ,003 |
| holiday(1)         | 3,316   | 1  | ,069 |
| season             | 5,196   | 4  | ,268 |
| season(1)          | ,388    | 1  | ,533 |
| season(2)          | 1,566   | 1  | ,211 |
| season(3)          | 2,964   | 1  | ,085 |
| season(4)          | ,650    | 1  | ,420 |
| Overall Statistics | 327,969 | 48 | ,000 |

**Block 1: Method = Enter**

**Omnibus Tests of Model Coefficients**

|             | Chi-square | df | Sig. |
|-------------|------------|----|------|
| Step 1 Step | 337,695    | 48 | ,000 |
| Block       | 337,695    | 48 | ,000 |
| Model       | 337,695    | 48 | ,000 |

**Model Summary**

| Step | -2 Log likelihood     | Cox & Snell R Square | Nagelkerke R Square |
|------|-----------------------|----------------------|---------------------|
| 1    | 5859,177 <sup>a</sup> | ,027                 | ,068                |

a. Estimation terminated at iteration number 7 because parameter estimates changed by less than ,001.

**Classification Table<sup>a</sup>**

| Observed           |                                                |                                                              |
|--------------------|------------------------------------------------|--------------------------------------------------------------|
| Step 1             | luonnelt1 luonne highest = tapahtui potilaalle | 0 ingen händelse eller läheltä piti<br>1 tapahtui potilaalle |
| Overall Percentage |                                                |                                                              |

Classification Table<sup>a</sup>

| Observed           |                                                | Predicted                           |                                     |
|--------------------|------------------------------------------------|-------------------------------------|-------------------------------------|
|                    |                                                | luonnelt1 luonne highest = ...      | 0 ingen händelse eller läheltä piti |
| Step 1             | luonnelt1 luonne highest = tapahtui potilaalle | 0 ingen händelse eller läheltä piti | 11627                               |
|                    |                                                | 1 tapahtui potilaalle               | 848                                 |
| Overall Percentage |                                                |                                     |                                     |

Classification Table<sup>a</sup>

| Observed           |                                                | Predicted                           |                       |
|--------------------|------------------------------------------------|-------------------------------------|-----------------------|
|                    |                                                | luonnelt1 luonne highest ...        | 1 tapahtui potilaalle |
| Step 1             | luonnelt1 luonne highest = tapahtui potilaalle | 0 ingen händelse eller läheltä piti | 0                     |
|                    |                                                | 1 tapahtui potilaalle               | 0                     |
| Overall Percentage |                                                |                                     |                       |

Classification Table<sup>a</sup>

| Observed           |                                                | Predicted                           |       |
|--------------------|------------------------------------------------|-------------------------------------|-------|
|                    |                                                | Percentage Correct                  |       |
| Step 1             | luonnelt1 luonne highest = tapahtui potilaalle | 0 ingen händelse eller läheltä piti | 100,0 |
|                    |                                                | 1 tapahtui potilaalle               | ,0    |
| Overall Percentage |                                                |                                     | 93,2  |

a. The cut value is ,500

Variables in the Equation

|                         | B      | S.E. | Wald    | df | Sig. | Exp(B) |
|-------------------------|--------|------|---------|----|------|--------|
| Step 1 <sup>a</sup> bv3 |        |      | 5,945   | 2  | ,051 |        |
| bv3(1)                  | -,292  | ,141 | 4,310   | 1  | ,038 | ,746   |
| bv3(2)                  | ,107   | ,104 | 1,059   | 1  | ,303 | 1,113  |
| VASTY2                  |        |      | 242,042 | 35 | ,000 |        |
| VASTY2(1)               | ,118   | ,299 | ,156    | 1  | ,693 | 1,126  |
| VASTY2(2)               | ,566   | ,274 | 4,258   | 1  | ,039 | 1,762  |
| VASTY2(3)               | -1,454 | ,466 | 9,719   | 1  | ,002 | ,234   |
| VASTY2(4)               | ,163   | ,294 | ,307    | 1  | ,579 | 1,177  |
| VASTY2(5)               | -,175  | ,325 | ,290    | 1  | ,590 | ,839   |
| VASTY2(6)               | -1,266 | ,440 | 8,299   | 1  | ,004 | ,282   |
| VASTY2(7)               | ,567   | ,279 | 4,136   | 1  | ,042 | 1,763  |
| VASTY2(8)               | -,223  | ,320 | ,489    | 1  | ,485 | ,800   |
| VASTY2(9)               | ,297   | ,291 | 1,040   | 1  | ,308 | 1,345  |
| VASTY2(10)              | 1,055  | ,258 | 16,714  | 1  | ,000 | 2,872  |
| VASTY2(11)              | ,631   | ,272 | 5,363   | 1  | ,021 | 1,879  |
| VASTY2(12)              | ,154   | ,294 | ,274    | 1  | ,601 | 1,166  |
| VASTY2(13)              | 1,034  | ,259 | 15,951  | 1  | ,000 | 2,813  |
| VASTY2(14)              | -,222  | ,320 | ,481    | 1  | ,488 | ,801   |
| VASTY2(15)              | ,271   | ,288 | ,886    | 1  | ,347 | 1,312  |
| VASTY2(16)              | ,411   | ,332 | 1,537   | 1  | ,215 | 1,509  |
| VASTY2(17)              | -1,091 | ,418 | 6,822   | 1  | ,009 | ,336   |
| VASTY2(18)              | -,669  | ,365 | 3,356   | 1  | ,067 | ,512   |
| VASTY2(19)              | -1,634 | ,553 | 8,739   | 1  | ,003 | ,195   |
| VASTY2(20)              | ,059   | ,315 | ,036    | 1  | ,850 | 1,061  |
| VASTY2(21)              | -,108  | ,312 | ,120    | 1  | ,729 | ,898   |
| VASTY2(22)              | ,280   | ,290 | ,933    | 1  | ,334 | 1,324  |
| VASTY2(23)              | ,286   | ,288 | ,986    | 1  | ,321 | 1,331  |
| VASTY2(24)              | ,290   | ,286 | 1,029   | 1  | ,310 | 1,336  |
| VASTY2(25)              | ,314   | ,301 | 1,086   | 1  | ,297 | 1,369  |
| VASTY2(26)              | -,920  | ,419 | 4,817   | 1  | ,028 | ,399   |
| VASTY2(27)              | -1,430 | ,465 | 9,449   | 1  | ,002 | ,239   |
| VASTY2(28)              | -,969  | ,468 | 4,300   | 1  | ,038 | ,379   |
| VASTY2(29)              | -1,025 | ,401 | 6,538   | 1  | ,011 | ,359   |
| VASTY2(30)              | -,196  | ,316 | ,384    | 1  | ,535 | ,822   |
| VASTY2(31)              | ,520   | ,279 | 3,467   | 1  | ,063 | 1,682  |
| VASTY2(32)              | -,043  | ,314 | ,018    | 1  | ,892 | ,958   |
| VASTY2(33)              | ,035   | ,307 | ,013    | 1  | ,909 | 1,036  |
| VASTY2(34)              | -1,262 | ,439 | 8,285   | 1  | ,004 | ,283   |
| VASTY2(35)              | ,670   | ,279 | 5,760   | 1  | ,016 | 1,953  |
| weekday                 |        |      | 12,001  | 6  | ,062 |        |
| weekday(1)              | -,011  | ,129 | ,007    | 1  | ,932 | ,989   |
| weekday(2)              | -,037  | ,130 | ,083    | 1  | ,773 | ,963   |

## Variables in the Equation

|                     |            | 95% C.I. for EXP(B) |       |
|---------------------|------------|---------------------|-------|
|                     |            | Lower               | Upper |
| Step 1 <sup>a</sup> | bv3        |                     |       |
|                     | bv3(1)     | ,566                | ,984  |
|                     | bv3(2)     | ,907                | 1,366 |
|                     | VASTY2     |                     |       |
|                     | VASTY2(1)  | ,626                | 2,025 |
|                     | VASTY2(2)  | 1,029               | 3,017 |
|                     | VASTY2(3)  | ,094                | ,583  |
|                     | VASTY2(4)  | ,662                | 2,094 |
|                     | VASTY2(5)  | ,444                | 1,587 |
|                     | VASTY2(6)  | ,119                | ,667  |
|                     | VASTY2(7)  | 1,021               | 3,046 |
|                     | VASTY2(8)  | ,427                | 1,497 |
|                     | VASTY2(9)  | ,761                | 2,379 |
|                     | VASTY2(10) | 1,732               | 4,763 |
|                     | VASTY2(11) | 1,102               | 3,206 |
|                     | VASTY2(12) | ,655                | 2,077 |
|                     | VASTY2(13) | 1,693               | 4,673 |
|                     | VASTY2(14) | ,428                | 1,500 |
|                     | VASTY2(15) | ,746                | 2,307 |
|                     | VASTY2(16) | ,787                | 2,891 |
|                     | VASTY2(17) | ,148                | ,762  |
|                     | VASTY2(18) | ,251                | 1,048 |
|                     | VASTY2(19) | ,066                | ,577  |
|                     | VASTY2(20) | ,573                | 1,966 |
|                     | VASTY2(21) | ,487                | 1,654 |
|                     | VASTY2(22) | ,749                | 2,338 |
|                     | VASTY2(23) | ,757                | 2,342 |
|                     | VASTY2(24) | ,763                | 2,340 |
|                     | VASTY2(25) | ,759                | 2,470 |
|                     | VASTY2(26) | ,175                | ,906  |
|                     | VASTY2(27) | ,096                | ,595  |
|                     | VASTY2(28) | ,152                | ,948  |
|                     | VASTY2(29) | ,164                | ,787  |
|                     | VASTY2(30) | ,443                | 1,527 |
|                     | VASTY2(31) | ,973                | 2,908 |
|                     | VASTY2(32) | ,518                | 1,774 |
|                     | VASTY2(33) | ,568                | 1,889 |
|                     | VASTY2(34) | ,120                | ,668  |
|                     | VASTY2(35) | 1,131               | 3,375 |
|                     | weekday    |                     |       |
|                     | weekday(1) | ,768                | 1,274 |
|                     | weekday(2) | ,747                | 1,243 |

Variables in the Equation

|            | B      | S.E. | Wald    | df | Sig. | Exp(B) |
|------------|--------|------|---------|----|------|--------|
| weekday(3) | -,048  | ,130 | ,134    | 1  | ,715 | ,953   |
| weekday(4) | ,035   | ,129 | ,072    | 1  | ,788 | 1,035  |
| weekday(5) | -,238  | ,139 | 2,932   | 1  | ,087 | ,788   |
| weekday(6) | -,363  | ,144 | 6,396   | 1  | ,011 | ,696   |
| holiday(1) | -,441  | ,253 | 3,048   | 1  | ,081 | ,643   |
| season     |        |      | 3,977   | 4  | ,409 |        |
| season(1)  | -,115  | ,113 | 1,032   | 1  | ,310 | ,891   |
| season(2)  | -,123  | ,106 | 1,350   | 1  | ,245 | ,885   |
| season(3)  | ,067   | ,108 | ,388    | 1  | ,533 | 1,070  |
| season(4)  | -,077  | ,115 | ,444    | 1  | ,505 | ,926   |
| Constant   | -2,524 | ,240 | 110,913 | 1  | ,000 | ,080   |

Variables in the Equation

|            | 95% C.I. for EXP(B) |       |
|------------|---------------------|-------|
|            | Lower               | Upper |
| weekday(3) | ,738                | 1,231 |
| weekday(4) | ,804                | 1,333 |
| weekday(5) | ,600                | 1,035 |
| weekday(6) | ,525                | ,922  |
| holiday(1) | ,392                | 1,056 |
| season     |                     |       |
| season(1)  | ,714                | 1,113 |
| season(2)  | ,719                | 1,088 |
| season(3)  | ,865                | 1,323 |
| season(4)  | ,739                | 1,161 |
| Constant   |                     |       |

a. Variable(s) entered on step 1: bv3, VASTY2, weekday, holiday, season.

```
LOGISTIC REGRESSION VARIABLES luonnelt1
/METHOD=ENTER sv3 VASTY2 weekday holiday season
/CONTRAST (sv3)=Indicator(1)
/CONTRAST (VASTY2)=Indicator(1)
/CONTRAST (weekday)=Indicator(1)
/CONTRAST (holiday)=Indicator(1)
/CONTRAST (season)=Indicator(1)
/PRINT=CI(95)
/CRITERIA=PIN(0.05) POUT(0.10) ITERATE(20) CUT(0.5).
```

## Logistic Regression

[DataSet6] C:\cWordjan\Rafaela\_VCS\alla\_tillsammans\abo\_bjo\_vasa\_v1.sav

### Case Processing Summary

| Unweighted Cases <sup>a</sup> |                      | N     | Percent |
|-------------------------------|----------------------|-------|---------|
| Selected Cases                | Included in Analysis | 12475 | 100,0   |
|                               | Missing Cases        | 0     | ,0      |
|                               | Total                | 12475 | 100,0   |
| Unselected Cases              |                      | 0     | ,0      |
| Total                         |                      | 12475 | 100,0   |

a. If weight is in effect, see classification table for the total number of cases.

### Dependent Variable Encoding

| Original Value                      | Internal Value |
|-------------------------------------|----------------|
| 0 ingen händelse eller läheltä piti | 0              |
| 1 tapahtui potilaalle               | 1              |

### Categorical Variables Codings

|                           | Frequency | Parameter |
|---------------------------|-----------|-----------|
|                           |           | (1)       |
| VASTY2 (SAIR*10000)+VASTY | 365       | ,000      |
| 403073101                 | 362       | 1,000     |
| 403073102                 | 365       | ,000      |
| 403073103                 | 365       | ,000      |
| 403073202                 | 365       | ,000      |
| 403073203                 | 365       | ,000      |
| 403073204                 | 330       | ,000      |
| 403073303                 | 364       | ,000      |
| 403073651                 | 362       | ,000      |
| 403073771                 | 365       | ,000      |
| 403133102                 | 341       | ,000      |
| 403133106                 | 365       | ,000      |
| 403133107                 | 365       | ,000      |
| 403133109                 | 365       | ,000      |
| 403133202                 | 365       | ,000      |
| 403133203                 | 365       | ,000      |
| 403133204                 | 365       | ,000      |
| 403133315                 | 177       | ,000      |
| 403133322                 | 365       | ,000      |
| 403133401                 | 362       | ,000      |
| 403133402                 | 365       | ,000      |
| 403133550                 | 298       | ,000      |
| 403133772                 | 365       | ,000      |
| 403135803                 | 365       | ,000      |
| 404060001                 | 365       | ,000      |
| 404060002                 | 366       | ,000      |
| 404310003                 | 291       | ,000      |
| 404310004                 | 291       | ,000      |

## Categorical Variables Codings

|                           |           | Parameter coding |       |
|---------------------------|-----------|------------------|-------|
|                           |           | (2)              | (3)   |
| VASTY2 (SAIR*10000)+VASTY | 403073101 | ,000             | ,000  |
|                           | 403073102 | ,000             | ,000  |
|                           | 403073103 | 1,000            | ,000  |
|                           | 403073202 | ,000             | 1,000 |
|                           | 403073203 | ,000             | ,000  |
|                           | 403073204 | ,000             | ,000  |
|                           | 403073303 | ,000             | ,000  |
|                           | 403073651 | ,000             | ,000  |
|                           | 403073771 | ,000             | ,000  |
|                           | 403133102 | ,000             | ,000  |
|                           | 403133106 | ,000             | ,000  |
|                           | 403133107 | ,000             | ,000  |
|                           | 403133109 | ,000             | ,000  |
|                           | 403133202 | ,000             | ,000  |
|                           | 403133203 | ,000             | ,000  |
|                           | 403133204 | ,000             | ,000  |
|                           | 403133315 | ,000             | ,000  |
|                           | 403133322 | ,000             | ,000  |
|                           | 403133401 | ,000             | ,000  |
|                           | 403133402 | ,000             | ,000  |
|                           | 403133550 | ,000             | ,000  |
|                           | 403133772 | ,000             | ,000  |
|                           | 403135803 | ,000             | ,000  |
|                           | 404060001 | ,000             | ,000  |
|                           | 404060002 | ,000             | ,000  |
|                           | 404310003 | ,000             | ,000  |
|                           | 404310004 | ,000             | ,000  |

## Categorical Variables Codings

|                           |           | Parameter coding |       |
|---------------------------|-----------|------------------|-------|
|                           |           | (4)              | (5)   |
| VASTY2 (SAIR*10000)+VASTY | 403073101 | ,000             | ,000  |
|                           | 403073102 | ,000             | ,000  |
|                           | 403073103 | ,000             | ,000  |
|                           | 403073202 | ,000             | ,000  |
|                           | 403073203 | 1,000            | ,000  |
|                           | 403073204 | ,000             | 1,000 |
|                           | 403073303 | ,000             | ,000  |
|                           | 403073651 | ,000             | ,000  |
|                           | 403073771 | ,000             | ,000  |
|                           | 403133102 | ,000             | ,000  |
|                           | 403133106 | ,000             | ,000  |
|                           | 403133107 | ,000             | ,000  |
|                           | 403133109 | ,000             | ,000  |
|                           | 403133202 | ,000             | ,000  |
|                           | 403133203 | ,000             | ,000  |
|                           | 403133204 | ,000             | ,000  |
|                           | 403133315 | ,000             | ,000  |
|                           | 403133322 | ,000             | ,000  |
|                           | 403133401 | ,000             | ,000  |
|                           | 403133402 | ,000             | ,000  |
|                           | 403133550 | ,000             | ,000  |
|                           | 403133772 | ,000             | ,000  |
|                           | 403135803 | ,000             | ,000  |
|                           | 404060001 | ,000             | ,000  |
|                           | 404060002 | ,000             | ,000  |
|                           | 404310003 | ,000             | ,000  |
|                           | 404310004 | ,000             | ,000  |



1  
2  
3  
4  
5  
6  
7  
8  
9  
10  
11  
12  
13  
14  
15  
16  
17  
18  
19  
20  
21  
22  
23  
24  
25  
26  
27  
28  
29  
30  
31  
32  
33  
34  
35  
36  
37  
38  
39  
40  
41  
42  
43  
44  
45  
46  
47  
48  
49  
50  
51  
52  
53  
54  
55  
56  
57  
58  
59  
60

**Categorical Variables Codings**

|                           |           | Parameter coding |       |
|---------------------------|-----------|------------------|-------|
|                           |           | (6)              | (7)   |
| VASTY2 (SAIR*10000)+VASTY | 403073101 | ,000             | ,000  |
|                           | 403073102 | ,000             | ,000  |
|                           | 403073103 | ,000             | ,000  |
|                           | 403073202 | ,000             | ,000  |
|                           | 403073203 | ,000             | ,000  |
|                           | 403073204 | ,000             | ,000  |
|                           | 403073303 | 1,000            | ,000  |
|                           | 403073651 | ,000             | 1,000 |
|                           | 403073771 | ,000             | ,000  |
|                           | 403133102 | ,000             | ,000  |
|                           | 403133106 | ,000             | ,000  |
|                           | 403133107 | ,000             | ,000  |
|                           | 403133109 | ,000             | ,000  |
|                           | 403133202 | ,000             | ,000  |
|                           | 403133203 | ,000             | ,000  |
|                           | 403133204 | ,000             | ,000  |
|                           | 403133315 | ,000             | ,000  |
|                           | 403133322 | ,000             | ,000  |
|                           | 403133401 | ,000             | ,000  |
|                           | 403133402 | ,000             | ,000  |
|                           | 403133550 | ,000             | ,000  |
|                           | 403133772 | ,000             | ,000  |
|                           | 403135803 | ,000             | ,000  |
|                           | 404060001 | ,000             | ,000  |
|                           | 404060002 | ,000             | ,000  |
|                           | 404310003 | ,000             | ,000  |
|                           | 404310004 | ,000             | ,000  |

## Categorical Variables Codings

|                           |           | Parameter coding |       |
|---------------------------|-----------|------------------|-------|
|                           |           | (8)              | (9)   |
| VASTY2 (SAIR*10000)+VASTY | 403073101 | ,000             | ,000  |
|                           | 403073102 | ,000             | ,000  |
|                           | 403073103 | ,000             | ,000  |
|                           | 403073202 | ,000             | ,000  |
|                           | 403073203 | ,000             | ,000  |
|                           | 403073204 | ,000             | ,000  |
|                           | 403073303 | ,000             | ,000  |
|                           | 403073651 | ,000             | ,000  |
|                           | 403073771 | 1,000            | ,000  |
|                           | 403133102 | ,000             | 1,000 |
|                           | 403133106 | ,000             | ,000  |
|                           | 403133107 | ,000             | ,000  |
|                           | 403133109 | ,000             | ,000  |
|                           | 403133202 | ,000             | ,000  |
|                           | 403133203 | ,000             | ,000  |
|                           | 403133204 | ,000             | ,000  |
|                           | 403133315 | ,000             | ,000  |
|                           | 403133322 | ,000             | ,000  |
|                           | 403133401 | ,000             | ,000  |
|                           | 403133402 | ,000             | ,000  |
|                           | 403133550 | ,000             | ,000  |
|                           | 403133772 | ,000             | ,000  |
|                           | 403135803 | ,000             | ,000  |
|                           | 404060001 | ,000             | ,000  |
|                           | 404060002 | ,000             | ,000  |
|                           | 404310003 | ,000             | ,000  |
|                           | 404310004 | ,000             | ,000  |

1  
2  
3  
4  
5  
6  
7  
8  
9  
10  
11  
12  
13  
14  
15  
16  
17  
18  
19  
20  
21  
22  
23  
24  
25  
26  
27  
28  
29  
30  
31  
32  
33  
34  
35  
36  
37  
38  
39  
40  
41  
42  
43  
44  
45  
46  
47  
48  
49  
50  
51  
52  
53  
54  
55  
56  
57  
58  
59  
60

**Categorical Variables Codings**

|                           |           | Parameter coding |       |
|---------------------------|-----------|------------------|-------|
|                           |           | (10)             | (11)  |
| VASTY2 (SAIR*10000)+VASTY | 403073101 | ,000             | ,000  |
|                           | 403073102 | ,000             | ,000  |
|                           | 403073103 | ,000             | ,000  |
|                           | 403073202 | ,000             | ,000  |
|                           | 403073203 | ,000             | ,000  |
|                           | 403073204 | ,000             | ,000  |
|                           | 403073303 | ,000             | ,000  |
|                           | 403073651 | ,000             | ,000  |
|                           | 403073771 | ,000             | ,000  |
|                           | 403133102 | ,000             | ,000  |
|                           | 403133106 | 1,000            | ,000  |
|                           | 403133107 | ,000             | 1,000 |
|                           | 403133109 | ,000             | ,000  |
|                           | 403133202 | ,000             | ,000  |
|                           | 403133203 | ,000             | ,000  |
|                           | 403133204 | ,000             | ,000  |
|                           | 403133315 | ,000             | ,000  |
|                           | 403133322 | ,000             | ,000  |
|                           | 403133401 | ,000             | ,000  |
|                           | 403133402 | ,000             | ,000  |
|                           | 403133550 | ,000             | ,000  |
|                           | 403133772 | ,000             | ,000  |
|                           | 403135803 | ,000             | ,000  |
|                           | 404060001 | ,000             | ,000  |
|                           | 404060002 | ,000             | ,000  |
|                           | 404310003 | ,000             | ,000  |
|                           | 404310004 | ,000             | ,000  |

## Categorical Variables Codings

|                           |           | Parameter coding |       |
|---------------------------|-----------|------------------|-------|
|                           |           | (12)             | (13)  |
| VASTY2 (SAIR*10000)+VASTY | 403073101 | ,000             | ,000  |
|                           | 403073102 | ,000             | ,000  |
|                           | 403073103 | ,000             | ,000  |
|                           | 403073202 | ,000             | ,000  |
|                           | 403073203 | ,000             | ,000  |
|                           | 403073204 | ,000             | ,000  |
|                           | 403073303 | ,000             | ,000  |
|                           | 403073651 | ,000             | ,000  |
|                           | 403073771 | ,000             | ,000  |
|                           | 403133102 | ,000             | ,000  |
|                           | 403133106 | ,000             | ,000  |
|                           | 403133107 | ,000             | ,000  |
|                           | 403133109 | 1,000            | ,000  |
|                           | 403133202 | ,000             | 1,000 |
|                           | 403133203 | ,000             | ,000  |
|                           | 403133204 | ,000             | ,000  |
|                           | 403133315 | ,000             | ,000  |
|                           | 403133322 | ,000             | ,000  |
|                           | 403133401 | ,000             | ,000  |
|                           | 403133402 | ,000             | ,000  |
|                           | 403133550 | ,000             | ,000  |
|                           | 403133772 | ,000             | ,000  |
|                           | 403135803 | ,000             | ,000  |
|                           | 404060001 | ,000             | ,000  |
|                           | 404060002 | ,000             | ,000  |
|                           | 404310003 | ,000             | ,000  |
|                           | 404310004 | ,000             | ,000  |

**Categorical Variables Codings**

|                           |           | Parameter coding |       |
|---------------------------|-----------|------------------|-------|
|                           |           | (14)             | (15)  |
| VASTY2 (SAIR*10000)+VASTY | 403073101 | ,000             | ,000  |
|                           | 403073102 | ,000             | ,000  |
|                           | 403073103 | ,000             | ,000  |
|                           | 403073202 | ,000             | ,000  |
|                           | 403073203 | ,000             | ,000  |
|                           | 403073204 | ,000             | ,000  |
|                           | 403073303 | ,000             | ,000  |
|                           | 403073651 | ,000             | ,000  |
|                           | 403073771 | ,000             | ,000  |
|                           | 403133102 | ,000             | ,000  |
|                           | 403133106 | ,000             | ,000  |
|                           | 403133107 | ,000             | ,000  |
|                           | 403133109 | ,000             | ,000  |
|                           | 403133202 | ,000             | ,000  |
|                           | 403133203 | 1,000            | ,000  |
|                           | 403133204 | ,000             | 1,000 |
|                           | 403133315 | ,000             | ,000  |
|                           | 403133322 | ,000             | ,000  |
|                           | 403133401 | ,000             | ,000  |
|                           | 403133402 | ,000             | ,000  |
|                           | 403133550 | ,000             | ,000  |
|                           | 403133772 | ,000             | ,000  |
|                           | 403135803 | ,000             | ,000  |
|                           | 404060001 | ,000             | ,000  |
|                           | 404060002 | ,000             | ,000  |
|                           | 404310003 | ,000             | ,000  |
|                           | 404310004 | ,000             | ,000  |

BMJ

## Categorical Variables Codings

|                           |           | Parameter coding |       |
|---------------------------|-----------|------------------|-------|
|                           |           | (16)             | (17)  |
| VASTY2 (SAIR*10000)+VASTY | 403073101 | ,000             | ,000  |
|                           | 403073102 | ,000             | ,000  |
|                           | 403073103 | ,000             | ,000  |
|                           | 403073202 | ,000             | ,000  |
|                           | 403073203 | ,000             | ,000  |
|                           | 403073204 | ,000             | ,000  |
|                           | 403073303 | ,000             | ,000  |
|                           | 403073651 | ,000             | ,000  |
|                           | 403073771 | ,000             | ,000  |
|                           | 403133102 | ,000             | ,000  |
|                           | 403133106 | ,000             | ,000  |
|                           | 403133107 | ,000             | ,000  |
|                           | 403133109 | ,000             | ,000  |
|                           | 403133202 | ,000             | ,000  |
|                           | 403133203 | ,000             | ,000  |
|                           | 403133204 | ,000             | ,000  |
|                           | 403133315 | 1,000            | ,000  |
|                           | 403133322 | ,000             | 1,000 |
|                           | 403133401 | ,000             | ,000  |
|                           | 403133402 | ,000             | ,000  |
|                           | 403133550 | ,000             | ,000  |
|                           | 403133772 | ,000             | ,000  |
|                           | 403135803 | ,000             | ,000  |
|                           | 404060001 | ,000             | ,000  |
|                           | 404060002 | ,000             | ,000  |
|                           | 404310003 | ,000             | ,000  |
|                           | 404310004 | ,000             | ,000  |

**Categorical Variables Codings**

|                           |           | Parameter coding |       |
|---------------------------|-----------|------------------|-------|
|                           |           | (18)             | (19)  |
| VASTY2 (SAIR*10000)+VASTY | 403073101 | ,000             | ,000  |
|                           | 403073102 | ,000             | ,000  |
|                           | 403073103 | ,000             | ,000  |
|                           | 403073202 | ,000             | ,000  |
|                           | 403073203 | ,000             | ,000  |
|                           | 403073204 | ,000             | ,000  |
|                           | 403073303 | ,000             | ,000  |
|                           | 403073651 | ,000             | ,000  |
|                           | 403073771 | ,000             | ,000  |
|                           | 403133102 | ,000             | ,000  |
|                           | 403133106 | ,000             | ,000  |
|                           | 403133107 | ,000             | ,000  |
|                           | 403133109 | ,000             | ,000  |
|                           | 403133202 | ,000             | ,000  |
|                           | 403133203 | ,000             | ,000  |
|                           | 403133204 | ,000             | ,000  |
|                           | 403133315 | ,000             | ,000  |
|                           | 403133322 | ,000             | ,000  |
|                           | 403133401 | 1,000            | ,000  |
|                           | 403133402 | ,000             | 1,000 |
|                           | 403133550 | ,000             | ,000  |
|                           | 403133772 | ,000             | ,000  |
|                           | 403135803 | ,000             | ,000  |
|                           | 404060001 | ,000             | ,000  |
|                           | 404060002 | ,000             | ,000  |
|                           | 404310003 | ,000             | ,000  |
|                           | 404310004 | ,000             | ,000  |

BMJ

## Categorical Variables Codings

|                           |           | Parameter coding |       |
|---------------------------|-----------|------------------|-------|
|                           |           | (20)             | (21)  |
| VASTY2 (SAIR*10000)+VASTY | 403073101 | ,000             | ,000  |
|                           | 403073102 | ,000             | ,000  |
|                           | 403073103 | ,000             | ,000  |
|                           | 403073202 | ,000             | ,000  |
|                           | 403073203 | ,000             | ,000  |
|                           | 403073204 | ,000             | ,000  |
|                           | 403073303 | ,000             | ,000  |
|                           | 403073651 | ,000             | ,000  |
|                           | 403073771 | ,000             | ,000  |
|                           | 403133102 | ,000             | ,000  |
|                           | 403133106 | ,000             | ,000  |
|                           | 403133107 | ,000             | ,000  |
|                           | 403133109 | ,000             | ,000  |
|                           | 403133202 | ,000             | ,000  |
|                           | 403133203 | ,000             | ,000  |
|                           | 403133204 | ,000             | ,000  |
|                           | 403133315 | ,000             | ,000  |
|                           | 403133322 | ,000             | ,000  |
|                           | 403133401 | ,000             | ,000  |
|                           | 403133402 | ,000             | ,000  |
|                           | 403133550 | 1,000            | ,000  |
|                           | 403133772 | ,000             | 1,000 |
|                           | 403135803 | ,000             | ,000  |
|                           | 404060001 | ,000             | ,000  |
|                           | 404060002 | ,000             | ,000  |
|                           | 404310003 | ,000             | ,000  |
|                           | 404310004 | ,000             | ,000  |



**Categorical Variables Codings**

|                           |           | Parameter coding |       |
|---------------------------|-----------|------------------|-------|
|                           |           | (22)             | (23)  |
| VASTY2 (SAIR*10000)+VASTY | 403073101 | ,000             | ,000  |
|                           | 403073102 | ,000             | ,000  |
|                           | 403073103 | ,000             | ,000  |
|                           | 403073202 | ,000             | ,000  |
|                           | 403073203 | ,000             | ,000  |
|                           | 403073204 | ,000             | ,000  |
|                           | 403073303 | ,000             | ,000  |
|                           | 403073651 | ,000             | ,000  |
|                           | 403073771 | ,000             | ,000  |
|                           | 403133102 | ,000             | ,000  |
|                           | 403133106 | ,000             | ,000  |
|                           | 403133107 | ,000             | ,000  |
|                           | 403133109 | ,000             | ,000  |
|                           | 403133202 | ,000             | ,000  |
|                           | 403133203 | ,000             | ,000  |
|                           | 403133204 | ,000             | ,000  |
|                           | 403133315 | ,000             | ,000  |
|                           | 403133322 | ,000             | ,000  |
|                           | 403133401 | ,000             | ,000  |
|                           | 403133402 | ,000             | ,000  |
|                           | 403133550 | ,000             | ,000  |
|                           | 403133772 | ,000             | ,000  |
|                           | 403135803 | 1,000            | ,000  |
|                           | 404060001 | ,000             | 1,000 |
|                           | 404060002 | ,000             | ,000  |
|                           | 404310003 | ,000             | ,000  |
|                           | 404310004 | ,000             | ,000  |

BMJ

## Categorical Variables Codings

|                           |           | Parameter coding |       |
|---------------------------|-----------|------------------|-------|
|                           |           | (24)             | (25)  |
| VASTY2 (SAIR*10000)+VASTY | 403073101 | ,000             | ,000  |
|                           | 403073102 | ,000             | ,000  |
|                           | 403073103 | ,000             | ,000  |
|                           | 403073202 | ,000             | ,000  |
|                           | 403073203 | ,000             | ,000  |
|                           | 403073204 | ,000             | ,000  |
|                           | 403073303 | ,000             | ,000  |
|                           | 403073651 | ,000             | ,000  |
|                           | 403073771 | ,000             | ,000  |
|                           | 403133102 | ,000             | ,000  |
|                           | 403133106 | ,000             | ,000  |
|                           | 403133107 | ,000             | ,000  |
|                           | 403133109 | ,000             | ,000  |
|                           | 403133202 | ,000             | ,000  |
|                           | 403133203 | ,000             | ,000  |
|                           | 403133204 | ,000             | ,000  |
|                           | 403133315 | ,000             | ,000  |
|                           | 403133322 | ,000             | ,000  |
|                           | 403133401 | ,000             | ,000  |
|                           | 403133402 | ,000             | ,000  |
|                           | 403133550 | ,000             | ,000  |
|                           | 403133772 | ,000             | ,000  |
|                           | 403135803 | ,000             | ,000  |
|                           | 404060001 | ,000             | ,000  |
|                           | 404060002 | 1,000            | ,000  |
|                           | 404310003 | ,000             | 1,000 |
|                           | 404310004 | ,000             | ,000  |

**Categorical Variables Codings**

|                           |           | Parameter coding |      |
|---------------------------|-----------|------------------|------|
|                           |           | (26)             | (27) |
| VASTY2 (SAIR*10000)+VASTY | 403073101 | ,000             | ,000 |
|                           | 403073102 | ,000             | ,000 |
|                           | 403073103 | ,000             | ,000 |
|                           | 403073202 | ,000             | ,000 |
|                           | 403073203 | ,000             | ,000 |
|                           | 403073204 | ,000             | ,000 |
|                           | 403073303 | ,000             | ,000 |
|                           | 403073651 | ,000             | ,000 |
|                           | 403073771 | ,000             | ,000 |
|                           | 403133102 | ,000             | ,000 |
|                           | 403133106 | ,000             | ,000 |
|                           | 403133107 | ,000             | ,000 |
|                           | 403133109 | ,000             | ,000 |
|                           | 403133202 | ,000             | ,000 |
|                           | 403133203 | ,000             | ,000 |
|                           | 403133204 | ,000             | ,000 |
|                           | 403133315 | ,000             | ,000 |
|                           | 403133322 | ,000             | ,000 |
|                           | 403133401 | ,000             | ,000 |
|                           | 403133402 | ,000             | ,000 |
|                           | 403133550 | ,000             | ,000 |
|                           | 403133772 | ,000             | ,000 |
|                           | 403135803 | ,000             | ,000 |
|                           | 404060001 | ,000             | ,000 |
|                           | 404060002 | ,000             | ,000 |
|                           | 404310003 | ,000             | ,000 |
|                           | 404310004 | 1,000            | ,000 |

BMJ

## Categorical Variables Codings

|                           |           | Parameter coding |      |
|---------------------------|-----------|------------------|------|
|                           |           | (28)             | (29) |
| VASTY2 (SAIR*10000)+VASTY | 403073101 | ,000             | ,000 |
|                           | 403073102 | ,000             | ,000 |
|                           | 403073103 | ,000             | ,000 |
|                           | 403073202 | ,000             | ,000 |
|                           | 403073203 | ,000             | ,000 |
|                           | 403073204 | ,000             | ,000 |
|                           | 403073303 | ,000             | ,000 |
|                           | 403073651 | ,000             | ,000 |
|                           | 403073771 | ,000             | ,000 |
|                           | 403133102 | ,000             | ,000 |
|                           | 403133106 | ,000             | ,000 |
|                           | 403133107 | ,000             | ,000 |
|                           | 403133109 | ,000             | ,000 |
|                           | 403133202 | ,000             | ,000 |
|                           | 403133203 | ,000             | ,000 |
|                           | 403133204 | ,000             | ,000 |
|                           | 403133315 | ,000             | ,000 |
|                           | 403133322 | ,000             | ,000 |
|                           | 403133401 | ,000             | ,000 |
|                           | 403133402 | ,000             | ,000 |
|                           | 403133550 | ,000             | ,000 |
|                           | 403133772 | ,000             | ,000 |
|                           | 403135803 | ,000             | ,000 |
|                           | 404060001 | ,000             | ,000 |
|                           | 404060002 | ,000             | ,000 |
|                           | 404310003 | ,000             | ,000 |
|                           | 404310004 | ,000             | ,000 |

1  
2  
3  
4  
5  
6  
7  
8  
9  
10  
11  
12  
13  
14  
15  
16  
17  
18  
19  
20  
21  
22  
23  
24  
25  
26  
27  
28  
29  
30  
31  
32  
33  
34  
35  
36  
37  
38  
39  
40  
41  
42  
43  
44  
45  
46  
47  
48  
49  
50  
51  
52  
53  
54  
55  
56  
57  
58  
59  
60

**Categorical Variables Codings**

|                           |           | Parameter coding |      |
|---------------------------|-----------|------------------|------|
|                           |           | (30)             | (31) |
| VASTY2 (SAIR*10000)+VASTY | 403073101 | ,000             | ,000 |
|                           | 403073102 | ,000             | ,000 |
|                           | 403073103 | ,000             | ,000 |
|                           | 403073202 | ,000             | ,000 |
|                           | 403073203 | ,000             | ,000 |
|                           | 403073204 | ,000             | ,000 |
|                           | 403073303 | ,000             | ,000 |
|                           | 403073651 | ,000             | ,000 |
|                           | 403073771 | ,000             | ,000 |
|                           | 403133102 | ,000             | ,000 |
|                           | 403133106 | ,000             | ,000 |
|                           | 403133107 | ,000             | ,000 |
|                           | 403133109 | ,000             | ,000 |
|                           | 403133202 | ,000             | ,000 |
|                           | 403133203 | ,000             | ,000 |
|                           | 403133204 | ,000             | ,000 |
|                           | 403133315 | ,000             | ,000 |
|                           | 403133322 | ,000             | ,000 |
|                           | 403133401 | ,000             | ,000 |
|                           | 403133402 | ,000             | ,000 |
|                           | 403133550 | ,000             | ,000 |
|                           | 403133772 | ,000             | ,000 |
|                           | 403135803 | ,000             | ,000 |
|                           | 404060001 | ,000             | ,000 |
|                           | 404060002 | ,000             | ,000 |
|                           | 404310003 | ,000             | ,000 |
|                           | 404310004 | ,000             | ,000 |

## Categorical Variables Codings

|                           |           | Parameter coding |      |
|---------------------------|-----------|------------------|------|
|                           |           | (32)             | (33) |
| VASTY2 (SAIR*10000)+VASTY | 403073101 | ,000             | ,000 |
|                           | 403073102 | ,000             | ,000 |
|                           | 403073103 | ,000             | ,000 |
|                           | 403073202 | ,000             | ,000 |
|                           | 403073203 | ,000             | ,000 |
|                           | 403073204 | ,000             | ,000 |
|                           | 403073303 | ,000             | ,000 |
|                           | 403073651 | ,000             | ,000 |
|                           | 403073771 | ,000             | ,000 |
|                           | 403133102 | ,000             | ,000 |
|                           | 403133106 | ,000             | ,000 |
|                           | 403133107 | ,000             | ,000 |
|                           | 403133109 | ,000             | ,000 |
|                           | 403133202 | ,000             | ,000 |
|                           | 403133203 | ,000             | ,000 |
|                           | 403133204 | ,000             | ,000 |
|                           | 403133315 | ,000             | ,000 |
|                           | 403133322 | ,000             | ,000 |
|                           | 403133401 | ,000             | ,000 |
|                           | 403133402 | ,000             | ,000 |
|                           | 403133550 | ,000             | ,000 |
|                           | 403133772 | ,000             | ,000 |
|                           | 403135803 | ,000             | ,000 |
|                           | 404060001 | ,000             | ,000 |
|                           | 404060002 | ,000             | ,000 |
|                           | 404310003 | ,000             | ,000 |
|                           | 404310004 | ,000             | ,000 |

## Categorical Variables Codings

|                           |           | Parameter coding |      |
|---------------------------|-----------|------------------|------|
|                           |           | (34)             | (35) |
| VASTY2 (SAIR*10000)+VASTY | 403073101 | ,000             | ,000 |
|                           | 403073102 | ,000             | ,000 |
|                           | 403073103 | ,000             | ,000 |
|                           | 403073202 | ,000             | ,000 |
|                           | 403073203 | ,000             | ,000 |
|                           | 403073204 | ,000             | ,000 |
|                           | 403073303 | ,000             | ,000 |
|                           | 403073651 | ,000             | ,000 |
|                           | 403073771 | ,000             | ,000 |
|                           | 403133102 | ,000             | ,000 |
|                           | 403133106 | ,000             | ,000 |
|                           | 403133107 | ,000             | ,000 |
|                           | 403133109 | ,000             | ,000 |
|                           | 403133202 | ,000             | ,000 |
|                           | 403133203 | ,000             | ,000 |
|                           | 403133204 | ,000             | ,000 |
|                           | 403133315 | ,000             | ,000 |
|                           | 403133322 | ,000             | ,000 |
|                           | 403133401 | ,000             | ,000 |
|                           | 403133402 | ,000             | ,000 |
|                           | 403133550 | ,000             | ,000 |
|                           | 403133772 | ,000             | ,000 |
|                           | 403135803 | ,000             | ,000 |
|                           | 404060001 | ,000             | ,000 |
|                           | 404060002 | ,000             | ,000 |
|                           | 404310003 | ,000             | ,000 |
|                           | 404310004 | ,000             | ,000 |

## Categorical Variables Codings

|                              |                                         | Frequency | Parameter<br>(1) |
|------------------------------|-----------------------------------------|-----------|------------------|
|                              | 502300005                               | 366       | ,000             |
|                              | 502300006                               | 225       | ,000             |
|                              | 502300007                               | 366       | ,000             |
|                              | 502300214                               | 366       | ,000             |
|                              | 502300411                               | 366       | ,000             |
|                              | 502300415                               | 360       | ,000             |
|                              | 502300416                               | 363       | ,000             |
|                              | 502300811                               | 364       | ,000             |
|                              | 502300913                               | 315       | ,000             |
| weekday veckodag             | 1 måndag                                | 1805      | ,000             |
|                              | 2 tisdag                                | 1812      | 1,000            |
|                              | 3 onsdag                                | 1800      | ,000             |
|                              | 4 torsdag                               | 1794      | ,000             |
|                              | 5 fredag                                | 1788      | ,000             |
|                              | 6 lördag                                | 1735      | ,000             |
|                              | 7 söndag                                | 1741      | ,000             |
| season säsong/period         | 1 januari-mars                          | 3182      | ,000             |
|                              | 2 april-maj                             | 2127      | 1,000            |
|                              | 3 juni-augusti                          | 2911      | ,000             |
|                              | 4 september-oktober                     | 2144      | ,000             |
|                              | 5 november-december                     | 2111      | ,000             |
| sv3 tredjedelar för standard | 1 andra tredjedelen                     | 3172      | ,000             |
|                              | 2 första tredjedelen                    | 4718      | 1,000            |
|                              | 3 tredje tredjedelen                    | 4585      | ,000             |
| holiday större helg          | 1 ingen större helg                     | 12078     | ,000             |
|                              | 2 större helg (påsk/midsommar/julonyår) | 397       | 1,000            |



## Categorical Variables Codings

|                              |                                         | Parameter coding |       |
|------------------------------|-----------------------------------------|------------------|-------|
|                              |                                         | (2)              | (3)   |
|                              | 502300005                               | ,000             | ,000  |
|                              | 502300006                               | ,000             | ,000  |
|                              | 502300007                               | ,000             | ,000  |
|                              | 502300214                               | ,000             | ,000  |
|                              | 502300411                               | ,000             | ,000  |
|                              | 502300415                               | ,000             | ,000  |
|                              | 502300416                               | ,000             | ,000  |
|                              | 502300811                               | ,000             | ,000  |
|                              | 502300913                               | ,000             | ,000  |
| weekday veckodag             | 1 måndag                                | ,000             | ,000  |
|                              | 2 tisdag                                | ,000             | ,000  |
|                              | 3 onsdag                                | 1,000            | ,000  |
|                              | 4 torsdag                               | ,000             | 1,000 |
|                              | 5 fredag                                | ,000             | ,000  |
|                              | 6 lördag                                | ,000             | ,000  |
|                              | 7 söndag                                | ,000             | ,000  |
| season säsong/period         | 1 januari-mars                          | ,000             | ,000  |
|                              | 2 april-maj                             | ,000             | ,000  |
|                              | 3 juni-augusti                          | 1,000            | ,000  |
|                              | 4 september-oktober                     | ,000             | 1,000 |
|                              | 5 november-december                     | ,000             | ,000  |
| sv3 tredjedelar för standard | 1 andra tredjedelen                     | ,000             |       |
|                              | 2 första tredjedelen                    | ,000             |       |
|                              | 3 tredje tredjedelen                    | 1,000            |       |
| holiday större helg          | 1 ingen större helg                     |                  |       |
|                              | 2 större helg (påsk/midsommar/julonyår) |                  |       |

## Categorical Variables Codings

|                              |                                         | Parameter coding |       |
|------------------------------|-----------------------------------------|------------------|-------|
|                              |                                         | (4)              | (5)   |
|                              | 502300005                               | ,000             | ,000  |
|                              | 502300006                               | ,000             | ,000  |
|                              | 502300007                               | ,000             | ,000  |
|                              | 502300214                               | ,000             | ,000  |
|                              | 502300411                               | ,000             | ,000  |
|                              | 502300415                               | ,000             | ,000  |
|                              | 502300416                               | ,000             | ,000  |
|                              | 502300811                               | ,000             | ,000  |
|                              | 502300913                               | ,000             | ,000  |
| weekday veckodag             | 1 måndag                                | ,000             | ,000  |
|                              | 2 tisdag                                | ,000             | ,000  |
|                              | 3 onsdag                                | ,000             | ,000  |
|                              | 4 torsdag                               | ,000             | ,000  |
|                              | 5 fredag                                | 1,000            | ,000  |
|                              | 6 lördag                                | ,000             | 1,000 |
|                              | 7 söndag                                | ,000             | ,000  |
| season säsong/period         | 1 januari-mars                          | ,000             |       |
|                              | 2 april-maj                             | ,000             |       |
|                              | 3 juni-augusti                          | ,000             |       |
|                              | 4 september-oktober                     | ,000             |       |
|                              | 5 november-december                     | 1,000            |       |
| sv3 tredjedelar för standard | 1 andra tredjedelen                     |                  |       |
|                              | 2 första tredjedelen                    |                  |       |
|                              | 3 tredje tredjedelen                    |                  |       |
| holiday större helg          | 1 ingen större helg                     |                  |       |
|                              | 2 större helg (påsk/midsommar/julonyår) |                  |       |

## Categorical Variables Codings

|                              |                                         | Parameter coding |      |
|------------------------------|-----------------------------------------|------------------|------|
|                              |                                         | (6)              | (7)  |
|                              | 502300005                               | ,000             | ,000 |
|                              | 502300006                               | ,000             | ,000 |
|                              | 502300007                               | ,000             | ,000 |
|                              | 502300214                               | ,000             | ,000 |
|                              | 502300411                               | ,000             | ,000 |
|                              | 502300415                               | ,000             | ,000 |
|                              | 502300416                               | ,000             | ,000 |
|                              | 502300811                               | ,000             | ,000 |
|                              | 502300913                               | ,000             | ,000 |
| weekday veckodag             | 1 måndag                                | ,000             |      |
|                              | 2 tisdag                                | ,000             |      |
|                              | 3 onsdag                                | ,000             |      |
|                              | 4 torsdag                               | ,000             |      |
|                              | 5 fredag                                | ,000             |      |
|                              | 6 lördag                                | ,000             |      |
|                              | 7 söndag                                | 1,000            |      |
| season säsong/period         | 1 januari-mars                          |                  |      |
|                              | 2 april-maj                             |                  |      |
|                              | 3 juni-augusti                          |                  |      |
|                              | 4 september-oktober                     |                  |      |
|                              | 5 november-december                     |                  |      |
| sv3 tredjedelar för standard | 1 andra tredjedelen                     |                  |      |
|                              | 2 första tredjedelen                    |                  |      |
|                              | 3 tredje tredjedelen                    |                  |      |
| holiday större helg          | 1 ingen större helg                     |                  |      |
|                              | 2 större helg (påsk/midsommar/julonyår) |                  |      |

## Categorical Variables Codings

|                              |                                         | Parameter coding |      |
|------------------------------|-----------------------------------------|------------------|------|
|                              |                                         | (8)              | (9)  |
|                              | 502300005                               | ,000             | ,000 |
|                              | 502300006                               | ,000             | ,000 |
|                              | 502300007                               | ,000             | ,000 |
|                              | 502300214                               | ,000             | ,000 |
|                              | 502300411                               | ,000             | ,000 |
|                              | 502300415                               | ,000             | ,000 |
|                              | 502300416                               | ,000             | ,000 |
|                              | 502300811                               | ,000             | ,000 |
|                              | 502300913                               | ,000             | ,000 |
| weekday veckodag             | 1 måndag                                |                  |      |
|                              | 2 tisdag                                |                  |      |
|                              | 3 onsdag                                |                  |      |
|                              | 4 torsdag                               |                  |      |
|                              | 5 fredag                                |                  |      |
|                              | 6 lördag                                |                  |      |
|                              | 7 söndag                                |                  |      |
| season säsong/period         | 1 januari-mars                          |                  |      |
|                              | 2 april-maj                             |                  |      |
|                              | 3 juni-augusti                          |                  |      |
|                              | 4 september-oktober                     |                  |      |
|                              | 5 november-december                     |                  |      |
| sv3 tredjedelar för standard | 1 andra tredjedelen                     |                  |      |
|                              | 2 första tredjedelen                    |                  |      |
|                              | 3 tredje tredjedelen                    |                  |      |
| holiday större helg          | 1 ingen större helg                     |                  |      |
|                              | 2 större helg (påsk/midsommar/julonyår) |                  |      |

## Categorical Variables Codings

|                              |                                         | Parameter coding |      |
|------------------------------|-----------------------------------------|------------------|------|
|                              |                                         | (10)             | (11) |
|                              | 502300005                               | ,000             | ,000 |
|                              | 502300006                               | ,000             | ,000 |
|                              | 502300007                               | ,000             | ,000 |
|                              | 502300214                               | ,000             | ,000 |
|                              | 502300411                               | ,000             | ,000 |
|                              | 502300415                               | ,000             | ,000 |
|                              | 502300416                               | ,000             | ,000 |
|                              | 502300811                               | ,000             | ,000 |
|                              | 502300913                               | ,000             | ,000 |
| weekday veckodag             | 1 måndag                                |                  |      |
|                              | 2 tisdag                                |                  |      |
|                              | 3 onsdag                                |                  |      |
|                              | 4 torsdag                               |                  |      |
|                              | 5 fredag                                |                  |      |
|                              | 6 lördag                                |                  |      |
|                              | 7 söndag                                |                  |      |
| season säsong/period         | 1 januari-mars                          |                  |      |
|                              | 2 april-maj                             |                  |      |
|                              | 3 juni-augusti                          |                  |      |
|                              | 4 september-oktober                     |                  |      |
|                              | 5 november-december                     |                  |      |
| sv3 tredjedelar för standard | 1 andra tredjedelen                     |                  |      |
|                              | 2 första tredjedelen                    |                  |      |
|                              | 3 tredje tredjedelen                    |                  |      |
| holiday större helg          | 1 ingen större helg                     |                  |      |
|                              | 2 större helg (påsk/midsommar/julonyår) |                  |      |

## Categorical Variables Codings

|                              |                                         | Parameter coding |      |
|------------------------------|-----------------------------------------|------------------|------|
|                              |                                         | (12)             | (13) |
|                              | 502300005                               | ,000             | ,000 |
|                              | 502300006                               | ,000             | ,000 |
|                              | 502300007                               | ,000             | ,000 |
|                              | 502300214                               | ,000             | ,000 |
|                              | 502300411                               | ,000             | ,000 |
|                              | 502300415                               | ,000             | ,000 |
|                              | 502300416                               | ,000             | ,000 |
|                              | 502300811                               | ,000             | ,000 |
|                              | 502300913                               | ,000             | ,000 |
| weekday veckodag             | 1 måndag                                |                  |      |
|                              | 2 tisdag                                |                  |      |
|                              | 3 onsdag                                |                  |      |
|                              | 4 torsdag                               |                  |      |
|                              | 5 fredag                                |                  |      |
|                              | 6 lördag                                |                  |      |
|                              | 7 söndag                                |                  |      |
| season säsong/period         | 1 januari-mars                          |                  |      |
|                              | 2 april-maj                             |                  |      |
|                              | 3 juni-augusti                          |                  |      |
|                              | 4 september-oktober                     |                  |      |
|                              | 5 november-december                     |                  |      |
| sv3 tredjedelar för standard | 1 andra tredjedelen                     |                  |      |
|                              | 2 första tredjedelen                    |                  |      |
|                              | 3 tredje tredjedelen                    |                  |      |
| holiday större helg          | 1 ingen större helg                     |                  |      |
|                              | 2 större helg (påsk/midsommar/julonyår) |                  |      |

## Categorical Variables Codings

|                              |                                         | Parameter coding |      |
|------------------------------|-----------------------------------------|------------------|------|
|                              |                                         | (14)             | (15) |
|                              | 502300005                               | ,000             | ,000 |
|                              | 502300006                               | ,000             | ,000 |
|                              | 502300007                               | ,000             | ,000 |
|                              | 502300214                               | ,000             | ,000 |
|                              | 502300411                               | ,000             | ,000 |
|                              | 502300415                               | ,000             | ,000 |
|                              | 502300416                               | ,000             | ,000 |
|                              | 502300811                               | ,000             | ,000 |
|                              | 502300913                               | ,000             | ,000 |
| weekday veckodag             | 1 måndag                                |                  |      |
|                              | 2 tisdag                                |                  |      |
|                              | 3 onsdag                                |                  |      |
|                              | 4 torsdag                               |                  |      |
|                              | 5 fredag                                |                  |      |
|                              | 6 lördag                                |                  |      |
|                              | 7 söndag                                |                  |      |
| season säsong/period         | 1 januari-mars                          |                  |      |
|                              | 2 april-maj                             |                  |      |
|                              | 3 juni-augusti                          |                  |      |
|                              | 4 september-oktober                     |                  |      |
|                              | 5 november-december                     |                  |      |
| sv3 tredjedelar för standard | 1 andra tredjedelen                     |                  |      |
|                              | 2 första tredjedelen                    |                  |      |
|                              | 3 tredje tredjedelen                    |                  |      |
| holiday större helg          | 1 ingen större helg                     |                  |      |
|                              | 2 större helg (påsk/midsommar/julonyår) |                  |      |

## Categorical Variables Codings

|                              |                                         | Parameter coding |      |
|------------------------------|-----------------------------------------|------------------|------|
|                              |                                         | (16)             | (17) |
|                              | 502300005                               | ,000             | ,000 |
|                              | 502300006                               | ,000             | ,000 |
|                              | 502300007                               | ,000             | ,000 |
|                              | 502300214                               | ,000             | ,000 |
|                              | 502300411                               | ,000             | ,000 |
|                              | 502300415                               | ,000             | ,000 |
|                              | 502300416                               | ,000             | ,000 |
|                              | 502300811                               | ,000             | ,000 |
|                              | 502300913                               | ,000             | ,000 |
| weekday veckodag             | 1 måndag                                |                  |      |
|                              | 2 tisdag                                |                  |      |
|                              | 3 onsdag                                |                  |      |
|                              | 4 torsdag                               |                  |      |
|                              | 5 fredag                                |                  |      |
|                              | 6 lördag                                |                  |      |
|                              | 7 söndag                                |                  |      |
| season säsong/period         | 1 januari-mars                          |                  |      |
|                              | 2 april-maj                             |                  |      |
|                              | 3 juni-augusti                          |                  |      |
|                              | 4 september-oktober                     |                  |      |
|                              | 5 november-december                     |                  |      |
| sv3 tredjedelar för standard | 1 andra tredjedelen                     |                  |      |
|                              | 2 första tredjedelen                    |                  |      |
|                              | 3 tredje tredjedelen                    |                  |      |
| holiday större helg          | 1 ingen större helg                     |                  |      |
|                              | 2 större helg (påsk/midsommar/julonyår) |                  |      |



## Categorical Variables Codings

|                              |                                         | Parameter coding |      |
|------------------------------|-----------------------------------------|------------------|------|
|                              |                                         | (18)             | (19) |
|                              | 502300005                               | ,000             | ,000 |
|                              | 502300006                               | ,000             | ,000 |
|                              | 502300007                               | ,000             | ,000 |
|                              | 502300214                               | ,000             | ,000 |
|                              | 502300411                               | ,000             | ,000 |
|                              | 502300415                               | ,000             | ,000 |
|                              | 502300416                               | ,000             | ,000 |
|                              | 502300811                               | ,000             | ,000 |
|                              | 502300913                               | ,000             | ,000 |
| weekday veckodag             | 1 måndag                                |                  |      |
|                              | 2 tisdag                                |                  |      |
|                              | 3 onsdag                                |                  |      |
|                              | 4 torsdag                               |                  |      |
|                              | 5 fredag                                |                  |      |
|                              | 6 lördag                                |                  |      |
|                              | 7 söndag                                |                  |      |
| season säsong/period         | 1 januari-mars                          |                  |      |
|                              | 2 april-maj                             |                  |      |
|                              | 3 juni-augusti                          |                  |      |
|                              | 4 september-oktober                     |                  |      |
|                              | 5 november-december                     |                  |      |
| sv3 tredjedelar för standard | 1 andra tredjedelen                     |                  |      |
|                              | 2 första tredjedelen                    |                  |      |
|                              | 3 tredje tredjedelen                    |                  |      |
| holiday större helg          | 1 ingen större helg                     |                  |      |
|                              | 2 större helg (påsk/midsommar/julonyår) |                  |      |

## Categorical Variables Codings

|                              |                                         | Parameter coding |      |
|------------------------------|-----------------------------------------|------------------|------|
|                              |                                         | (20)             | (21) |
|                              | 502300005                               | ,000             | ,000 |
|                              | 502300006                               | ,000             | ,000 |
|                              | 502300007                               | ,000             | ,000 |
|                              | 502300214                               | ,000             | ,000 |
|                              | 502300411                               | ,000             | ,000 |
|                              | 502300415                               | ,000             | ,000 |
|                              | 502300416                               | ,000             | ,000 |
|                              | 502300811                               | ,000             | ,000 |
|                              | 502300913                               | ,000             | ,000 |
| weekday veckodag             | 1 måndag                                |                  |      |
|                              | 2 tisdag                                |                  |      |
|                              | 3 onsdag                                |                  |      |
|                              | 4 torsdag                               |                  |      |
|                              | 5 fredag                                |                  |      |
|                              | 6 lördag                                |                  |      |
|                              | 7 söndag                                |                  |      |
| season säsong/period         | 1 januari-mars                          |                  |      |
|                              | 2 april-maj                             |                  |      |
|                              | 3 juni-augusti                          |                  |      |
|                              | 4 september-oktober                     |                  |      |
|                              | 5 november-december                     |                  |      |
| sv3 tredjedelar för standard | 1 andra tredjedelen                     |                  |      |
|                              | 2 första tredjedelen                    |                  |      |
|                              | 3 tredje tredjedelen                    |                  |      |
| holiday större helg          | 1 ingen större helg                     |                  |      |
|                              | 2 större helg (påsk/midsommar/julonyår) |                  |      |

## Categorical Variables Codings

|                              |                                         | Parameter coding |      |
|------------------------------|-----------------------------------------|------------------|------|
|                              |                                         | (22)             | (23) |
|                              | 502300005                               | ,000             | ,000 |
|                              | 502300006                               | ,000             | ,000 |
|                              | 502300007                               | ,000             | ,000 |
|                              | 502300214                               | ,000             | ,000 |
|                              | 502300411                               | ,000             | ,000 |
|                              | 502300415                               | ,000             | ,000 |
|                              | 502300416                               | ,000             | ,000 |
|                              | 502300811                               | ,000             | ,000 |
|                              | 502300913                               | ,000             | ,000 |
| weekday veckodag             | 1 måndag                                |                  |      |
|                              | 2 tisdag                                |                  |      |
|                              | 3 onsdag                                |                  |      |
|                              | 4 torsdag                               |                  |      |
|                              | 5 fredag                                |                  |      |
|                              | 6 lördag                                |                  |      |
|                              | 7 söndag                                |                  |      |
| season säsong/period         | 1 januari-mars                          |                  |      |
|                              | 2 april-maj                             |                  |      |
|                              | 3 juni-augusti                          |                  |      |
|                              | 4 september-oktober                     |                  |      |
|                              | 5 november-december                     |                  |      |
| sv3 tredjedelar för standard | 1 andra tredjedelen                     |                  |      |
|                              | 2 första tredjedelen                    |                  |      |
|                              | 3 tredje tredjedelen                    |                  |      |
| holiday större helg          | 1 ingen större helg                     |                  |      |
|                              | 2 större helg (påsk/midsommar/julonyår) |                  |      |

## Categorical Variables Codings

|                              |                                         | Parameter coding |      |
|------------------------------|-----------------------------------------|------------------|------|
|                              |                                         | (24)             | (25) |
|                              | 502300005                               | ,000             | ,000 |
|                              | 502300006                               | ,000             | ,000 |
|                              | 502300007                               | ,000             | ,000 |
|                              | 502300214                               | ,000             | ,000 |
|                              | 502300411                               | ,000             | ,000 |
|                              | 502300415                               | ,000             | ,000 |
|                              | 502300416                               | ,000             | ,000 |
|                              | 502300811                               | ,000             | ,000 |
|                              | 502300913                               | ,000             | ,000 |
| weekday veckodag             | 1 måndag                                |                  |      |
|                              | 2 tisdag                                |                  |      |
|                              | 3 onsdag                                |                  |      |
|                              | 4 torsdag                               |                  |      |
|                              | 5 fredag                                |                  |      |
|                              | 6 lördag                                |                  |      |
|                              | 7 söndag                                |                  |      |
| season säsong/period         | 1 januari-mars                          |                  |      |
|                              | 2 april-maj                             |                  |      |
|                              | 3 juni-augusti                          |                  |      |
|                              | 4 september-oktober                     |                  |      |
|                              | 5 november-december                     |                  |      |
| sv3 tredjedelar för standard | 1 andra tredjedelen                     |                  |      |
|                              | 2 första tredjedelen                    |                  |      |
|                              | 3 tredje tredjedelen                    |                  |      |
| holiday större helg          | 1 ingen större helg                     |                  |      |
|                              | 2 större helg (påsk/midsommar/julonyår) |                  |      |

## Categorical Variables Codings

|                              |                                         | Parameter coding |       |
|------------------------------|-----------------------------------------|------------------|-------|
|                              |                                         | (26)             | (27)  |
|                              | 502300005                               | ,000             | 1,000 |
|                              | 502300006                               | ,000             | ,000  |
|                              | 502300007                               | ,000             | ,000  |
|                              | 502300214                               | ,000             | ,000  |
|                              | 502300411                               | ,000             | ,000  |
|                              | 502300415                               | ,000             | ,000  |
|                              | 502300416                               | ,000             | ,000  |
|                              | 502300811                               | ,000             | ,000  |
|                              | 502300913                               | ,000             | ,000  |
| weekday veckodag             | 1 måndag                                |                  |       |
|                              | 2 tisdag                                |                  |       |
|                              | 3 onsdag                                |                  |       |
|                              | 4 torsdag                               |                  |       |
|                              | 5 fredag                                |                  |       |
|                              | 6 lördag                                |                  |       |
|                              | 7 söndag                                |                  |       |
| season säsong/period         | 1 januari-mars                          |                  |       |
|                              | 2 april-maj                             |                  |       |
|                              | 3 juni-augusti                          |                  |       |
|                              | 4 september-oktober                     |                  |       |
|                              | 5 november-december                     |                  |       |
| sv3 tredjedelar för standard | 1 andra tredjedelen                     |                  |       |
|                              | 2 första tredjedelen                    |                  |       |
|                              | 3 tredje tredjedelen                    |                  |       |
| holiday större helg          | 1 ingen större helg                     |                  |       |
|                              | 2 större helg (påsk/midsommar/julonyår) |                  |       |

## Categorical Variables Codings

|                              |                                         | Parameter coding |       |
|------------------------------|-----------------------------------------|------------------|-------|
|                              |                                         | (28)             | (29)  |
|                              | 502300005                               | ,000             | ,000  |
|                              | 502300006                               | 1,000            | ,000  |
|                              | 502300007                               | ,000             | 1,000 |
|                              | 502300214                               | ,000             | ,000  |
|                              | 502300411                               | ,000             | ,000  |
|                              | 502300415                               | ,000             | ,000  |
|                              | 502300416                               | ,000             | ,000  |
|                              | 502300811                               | ,000             | ,000  |
|                              | 502300913                               | ,000             | ,000  |
| weekday veckodag             | 1 måndag                                |                  |       |
|                              | 2 tisdag                                |                  |       |
|                              | 3 onsdag                                |                  |       |
|                              | 4 torsdag                               |                  |       |
|                              | 5 fredag                                |                  |       |
|                              | 6 lördag                                |                  |       |
|                              | 7 söndag                                |                  |       |
| season säsong/period         | 1 januari-mars                          |                  |       |
|                              | 2 april-maj                             |                  |       |
|                              | 3 juni-augusti                          |                  |       |
|                              | 4 september-oktober                     |                  |       |
|                              | 5 november-december                     |                  |       |
| sv3 tredjedelar för standard | 1 andra tredjedelen                     |                  |       |
|                              | 2 första tredjedelen                    |                  |       |
|                              | 3 tredje tredjedelen                    |                  |       |
| holiday större helg          | 1 ingen större helg                     |                  |       |
|                              | 2 större helg (påsk/midsommar/julonyår) |                  |       |

## Categorical Variables Codings

|                              |                                         | Parameter coding |       |
|------------------------------|-----------------------------------------|------------------|-------|
|                              |                                         | (30)             | (31)  |
|                              | 502300005                               | ,000             | ,000  |
|                              | 502300006                               | ,000             | ,000  |
|                              | 502300007                               | ,000             | ,000  |
|                              | 502300214                               | 1,000            | ,000  |
|                              | 502300411                               | ,000             | 1,000 |
|                              | 502300415                               | ,000             | ,000  |
|                              | 502300416                               | ,000             | ,000  |
|                              | 502300811                               | ,000             | ,000  |
|                              | 502300913                               | ,000             | ,000  |
| weekday veckodag             | 1 måndag                                |                  |       |
|                              | 2 tisdag                                |                  |       |
|                              | 3 onsdag                                |                  |       |
|                              | 4 torsdag                               |                  |       |
|                              | 5 fredag                                |                  |       |
|                              | 6 lördag                                |                  |       |
|                              | 7 söndag                                |                  |       |
| season säsong/period         | 1 januari-mars                          |                  |       |
|                              | 2 april-maj                             |                  |       |
|                              | 3 juni-augusti                          |                  |       |
|                              | 4 september-oktober                     |                  |       |
|                              | 5 november-december                     |                  |       |
| sv3 tredjedelar för standard | 1 andra tredjedelen                     |                  |       |
|                              | 2 första tredjedelen                    |                  |       |
|                              | 3 tredje tredjedelen                    |                  |       |
| holiday större helg          | 1 ingen större helg                     |                  |       |
|                              | 2 större helg (påsk/midsommar/julonyår) |                  |       |

## Categorical Variables Codings

|                              |                                         | Parameter coding |       |
|------------------------------|-----------------------------------------|------------------|-------|
|                              |                                         | (32)             | (33)  |
|                              | 502300005                               | ,000             | ,000  |
|                              | 502300006                               | ,000             | ,000  |
|                              | 502300007                               | ,000             | ,000  |
|                              | 502300214                               | ,000             | ,000  |
|                              | 502300411                               | ,000             | ,000  |
|                              | 502300415                               | 1,000            | ,000  |
|                              | 502300416                               | ,000             | 1,000 |
|                              | 502300811                               | ,000             | ,000  |
|                              | 502300913                               | ,000             | ,000  |
| weekday veckodag             | 1 måndag                                |                  |       |
|                              | 2 tisdag                                |                  |       |
|                              | 3 onsdag                                |                  |       |
|                              | 4 torsdag                               |                  |       |
|                              | 5 fredag                                |                  |       |
|                              | 6 lördag                                |                  |       |
|                              | 7 söndag                                |                  |       |
| season säsong/period         | 1 januari-mars                          |                  |       |
|                              | 2 april-maj                             |                  |       |
|                              | 3 juni-augusti                          |                  |       |
|                              | 4 september-oktober                     |                  |       |
|                              | 5 november-december                     |                  |       |
| sv3 tredjedelar för standard | 1 andra tredjedelen                     |                  |       |
|                              | 2 första tredjedelen                    |                  |       |
|                              | 3 tredje tredjedelen                    |                  |       |
| holiday större helg          | 1 ingen större helg                     |                  |       |
|                              | 2 större helg (påsk/midsommar/julonyår) |                  |       |



**Categorical Variables Codings**

|                              |                                         | Parameter coding |       |
|------------------------------|-----------------------------------------|------------------|-------|
|                              |                                         | (34)             | (35)  |
|                              | 502300005                               | ,000             | ,000  |
|                              | 502300006                               | ,000             | ,000  |
|                              | 502300007                               | ,000             | ,000  |
|                              | 502300214                               | ,000             | ,000  |
|                              | 502300411                               | ,000             | ,000  |
|                              | 502300415                               | ,000             | ,000  |
|                              | 502300416                               | ,000             | ,000  |
|                              | 502300811                               | 1,000            | ,000  |
|                              | 502300913                               | ,000             | 1,000 |
| weekday veckodag             | 1 måndag                                |                  |       |
|                              | 2 tisdag                                |                  |       |
|                              | 3 onsdag                                |                  |       |
|                              | 4 torsdag                               |                  |       |
|                              | 5 fredag                                |                  |       |
|                              | 6 lördag                                |                  |       |
|                              | 7 söndag                                |                  |       |
| season säsong/period         | 1 januari-mars                          |                  |       |
|                              | 2 april-maj                             |                  |       |
|                              | 3 juni-augusti                          |                  |       |
|                              | 4 september-oktober                     |                  |       |
|                              | 5 november-december                     |                  |       |
| sv3 tredjedelar för standard | 1 andra tredjedelen                     |                  |       |
|                              | 2 första tredjedelen                    |                  |       |
|                              | 3 tredje tredjedelen                    |                  |       |
| holiday större helg          | 1 ingen större helg                     |                  |       |
|                              | 2 större helg (påsk/midsommar/julonyår) |                  |       |

**Block 0: Beginning Block**

**Classification Table<sup>a,b</sup>**

| Observed           |                                                |                                                              |
|--------------------|------------------------------------------------|--------------------------------------------------------------|
| Step 0             | luonnelt1 luonne highest = tapahtui potilaalle | 0 ingen händelse eller läheltä piti<br>1 tapahtui potilaalle |
| Overall Percentage |                                                |                                                              |

Classification Table<sup>a,b</sup>

| Observed           |                                                |                                     | Predicted                      |                                     |
|--------------------|------------------------------------------------|-------------------------------------|--------------------------------|-------------------------------------|
|                    |                                                |                                     | luonnelt1 luonne highest = ... | 0 ingen händelse eller läheltä piti |
| Step 0             | luonnelt1 luonne highest = tapahtui potilaalle | 0 ingen händelse eller läheltä piti | 11627                          |                                     |
|                    |                                                | 1 tapahtui potilaalle               | 848                            |                                     |
| Overall Percentage |                                                |                                     |                                |                                     |

Classification Table<sup>a,b</sup>

| Observed           |                                                |                                     | Predicted                    |                       |
|--------------------|------------------------------------------------|-------------------------------------|------------------------------|-----------------------|
|                    |                                                |                                     | luonnelt1 luonne highest ... | 1 tapahtui potilaalle |
| Step 0             | luonnelt1 luonne highest = tapahtui potilaalle | 0 ingen händelse eller läheltä piti | 0                            |                       |
|                    |                                                | 1 tapahtui potilaalle               | 0                            |                       |
| Overall Percentage |                                                |                                     |                              |                       |

Classification Table<sup>a,b</sup>

| Observed           |                                                |                                     | Predicted          |  |
|--------------------|------------------------------------------------|-------------------------------------|--------------------|--|
|                    |                                                |                                     | Percentage Correct |  |
| Step 0             | luonnelt1 luonne highest = tapahtui potilaalle | 0 ingen händelse eller läheltä piti | 100,0              |  |
|                    |                                                | 1 tapahtui potilaalle               | ,0                 |  |
| Overall Percentage |                                                |                                     | 93,2               |  |

a. Constant is included in the model.

b. The cut value is ,500

Variables in the Equation

|                 | B      | S.E. | Wald     | df | Sig. | Exp(B) |
|-----------------|--------|------|----------|----|------|--------|
| Step 0 Constant | -2,618 | ,036 | 5417,889 | 1  | ,000 | ,073   |

## Variables not in the Equation

|        |           |            | Score   | df | Sig. |
|--------|-----------|------------|---------|----|------|
| Step 0 | Variables | sv3        | 16,006  | 2  | ,000 |
|        |           | sv3(1)     | 12,247  | 1  | ,000 |
|        |           | sv3(2)     | 13,246  | 1  | ,000 |
|        |           | VASTY2     | 299,491 | 35 | ,000 |
|        |           | VASTY2(1)  | ,007    | 1  | ,934 |
|        |           | VASTY2(2)  | 8,968   | 1  | ,003 |
|        |           | VASTY2(3)  | 15,764  | 1  | ,000 |
|        |           | VASTY2(4)  | ,453    | 1  | ,501 |
|        |           | VASTY2(5)  | ,965    | 1  | ,326 |
|        |           | VASTY2(6)  | 14,062  | 1  | ,000 |
|        |           | VASTY2(7)  | 12,067  | 1  | ,001 |
|        |           | VASTY2(8)  | 1,504   | 1  | ,220 |
|        |           | VASTY2(9)  | 1,612   | 1  | ,204 |
|        |           | VASTY2(10) | 55,161  | 1  | ,000 |
|        |           | VASTY2(11) | 11,675  | 1  | ,001 |
|        |           | VASTY2(12) | ,213    | 1  | ,644 |
|        |           | VASTY2(13) | 55,161  | 1  | ,000 |
|        |           | VASTY2(14) | 1,504   | 1  | ,220 |
|        |           | VASTY2(15) | 1,199   | 1  | ,273 |
|        |           | VASTY2(16) | 3,222   | 1  | ,073 |
|        |           | VASTY2(17) | 12,590  | 1  | ,000 |
|        |           | VASTY2(18) | 7,137   | 1  | ,008 |
|        |           | VASTY2(19) | 19,294  | 1  | ,000 |
|        |           | VASTY2(20) | ,030    | 1  | ,863 |
|        |           | VASTY2(21) | ,647    | 1  | ,421 |
|        |           | VASTY2(22) | ,782    | 1  | ,377 |
|        |           | VASTY2(23) | 1,199   | 1  | ,273 |
|        |           | VASTY2(24) | 2,253   | 1  | ,133 |
|        |           | VASTY2(25) | 1,513   | 1  | ,219 |
|        |           | VASTY2(26) | 7,708   | 1  | ,005 |
|        |           | VASTY2(27) | 15,836  | 1  | ,000 |
|        |           | VASTY2(28) | 6,172   | 1  | ,013 |
|        |           | VASTY2(29) | 11,203  | 1  | ,001 |
|        |           | VASTY2(30) | 1,058   | 1  | ,304 |
|        |           | VASTY2(31) | 6,527   | 1  | ,011 |
|        |           | VASTY2(32) | ,544    | 1  | ,461 |
|        |           | VASTY2(33) | ,126    | 1  | ,723 |
|        |           | VASTY2(34) | 14,062  | 1  | ,000 |
|        |           | VASTY2(35) | 15,901  | 1  | ,000 |
|        |           | weekday    | 14,938  | 6  | ,021 |
|        |           | weekday(1) | ,984    | 1  | ,321 |
|        |           | weekday(2) | ,599    | 1  | ,439 |
|        |           | weekday(3) | ,376    | 1  | ,540 |

## Variables not in the Equation

|                    | Score   | df | Sig. |
|--------------------|---------|----|------|
| weekday(4)         | 1,867   | 1  | ,172 |
| weekday(5)         | 3,400   | 1  | ,065 |
| weekday(6)         | 9,074   | 1  | ,003 |
| holiday(1)         | 3,316   | 1  | ,069 |
| season             | 5,196   | 4  | ,268 |
| season(1)          | ,388    | 1  | ,533 |
| season(2)          | 1,566   | 1  | ,211 |
| season(3)          | 2,964   | 1  | ,085 |
| season(4)          | ,650    | 1  | ,420 |
| Overall Statistics | 324,791 | 48 | ,000 |

## Block 1: Method = Enter

## Omnibus Tests of Model Coefficients

|             | Chi-square | df | Sig. |
|-------------|------------|----|------|
| Step 1 Step | 333,765    | 48 | ,000 |
| Block       | 333,765    | 48 | ,000 |
| Model       | 333,765    | 48 | ,000 |

## Model Summary

| Step | -2 Log likelihood     | Cox & Snell R Square | Nagelkerke R Square |
|------|-----------------------|----------------------|---------------------|
| 1    | 5863,107 <sup>a</sup> | ,026                 | ,067                |

a. Estimation terminated at iteration number 7 because parameter estimates changed by less than ,001.

Classification Table<sup>a</sup>

| Observed           |                                                |                                                              |
|--------------------|------------------------------------------------|--------------------------------------------------------------|
| Step 1             | luonnelt1 luonne highest = tapahtui potilaalle | 0 ingen händelse eller läheltä piti<br>1 tapahtui potilaalle |
| Overall Percentage |                                                |                                                              |

Classification Table<sup>a</sup>

| Observed           |                                                | Predicted                           |                                     |
|--------------------|------------------------------------------------|-------------------------------------|-------------------------------------|
|                    |                                                | luonnelt1 luonne highest = ...      | 0 ingen händelse eller läheltä piti |
| Step 1             | luonnelt1 luonne highest = tapahtui potilaalle | 0 ingen händelse eller läheltä piti | 11627                               |
|                    |                                                | 1 tapahtui potilaalle               | 848                                 |
| Overall Percentage |                                                |                                     |                                     |

Classification Table<sup>a</sup>

| Observed           |                                                | Predicted                           |                       |
|--------------------|------------------------------------------------|-------------------------------------|-----------------------|
|                    |                                                | luonnelt1 luonne highest ...        | 1 tapahtui potilaalle |
| Step 1             | luonnelt1 luonne highest = tapahtui potilaalle | 0 ingen händelse eller läheltä piti | 0                     |
|                    |                                                | 1 tapahtui potilaalle               | 0                     |
| Overall Percentage |                                                |                                     |                       |

Classification Table<sup>a</sup>

| Observed           |                                                | Predicted                           |       |
|--------------------|------------------------------------------------|-------------------------------------|-------|
|                    |                                                | Percentage Correct                  |       |
| Step 1             | luonnelt1 luonne highest = tapahtui potilaalle | 0 ingen händelse eller läheltä piti | 100,0 |
|                    |                                                | 1 tapahtui potilaalle               | ,0    |
| Overall Percentage |                                                |                                     | 93,2  |

a. The cut value is ,500

## Variables in the Equation

|                         | B      | S.E. | Wald    | df | Sig. | Exp(B) |
|-------------------------|--------|------|---------|----|------|--------|
| Step 1 <sup>a</sup> sv3 |        |      | 2,302   | 2  | ,316 |        |
| sv3(1)                  | -,017  | ,107 | ,026    | 1  | ,873 | ,983   |
| sv3(2)                  | ,137   | ,104 | 1,734   | 1  | ,188 | 1,146  |
| VASTY2                  |        |      | 233,198 | 35 | ,000 |        |
| VASTY2(1)               | ,063   | ,300 | ,044    | 1  | ,834 | 1,065  |
| VASTY2(2)               | ,506   | ,278 | 3,304   | 1  | ,069 | 1,659  |
| VASTY2(3)               | -1,377 | ,465 | 8,767   | 1  | ,003 | ,252   |
| VASTY2(4)               | ,216   | ,292 | ,548    | 1  | ,459 | 1,242  |
| VASTY2(5)               | -,127  | ,326 | ,152    | 1  | ,696 | ,880   |
| VASTY2(6)               | -1,326 | ,443 | 8,975   | 1  | ,003 | ,266   |
| VASTY2(7)               | ,655   | ,272 | 5,778   | 1  | ,016 | 1,925  |
| VASTY2(8)               | -,172  | ,320 | ,287    | 1  | ,592 | ,842   |
| VASTY2(9)               | ,316   | ,290 | 1,185   | 1  | ,276 | 1,372  |
| VASTY2(10)              | ,992   | ,264 | 14,138  | 1  | ,000 | 2,697  |
| VASTY2(11)              | ,633   | ,272 | 5,405   | 1  | ,020 | 1,883  |
| VASTY2(12)              | ,103   | ,298 | ,120    | 1  | ,729 | 1,109  |
| VASTY2(13)              | ,984   | ,265 | 13,793  | 1  | ,000 | 2,676  |
| VASTY2(14)              | -,254  | ,321 | ,625    | 1  | ,429 | ,776   |
| VASTY2(15)              | ,211   | ,292 | ,521    | 1  | ,470 | 1,235  |
| VASTY2(16)              | ,385   | ,331 | 1,351   | 1  | ,245 | 1,469  |
| VASTY2(17)              | -1,089 | ,418 | 6,776   | 1  | ,009 | ,337   |
| VASTY2(18)              | -,626  | ,371 | 2,847   | 1  | ,092 | ,535   |
| VASTY2(19)              | -1,757 | ,552 | 10,144  | 1  | ,001 | ,173   |
| VASTY2(20)              | ,033   | ,315 | ,011    | 1  | ,915 | 1,034  |
| VASTY2(21)              | -,079  | ,312 | ,063    | 1  | ,801 | ,924   |
| VASTY2(22)              | ,247   | ,290 | ,727    | 1  | ,394 | 1,280  |
| VASTY2(23)              | ,278   | ,288 | ,933    | 1  | ,334 | 1,321  |
| VASTY2(24)              | ,307   | ,285 | 1,157   | 1  | ,282 | 1,359  |
| VASTY2(25)              | ,318   | ,302 | 1,111   | 1  | ,292 | 1,375  |
| VASTY2(26)              | -,922  | ,419 | 4,848   | 1  | ,028 | ,398   |
| VASTY2(27)              | -1,475 | ,467 | 9,986   | 1  | ,002 | ,229   |
| VASTY2(28)              | -1,043 | ,472 | 4,893   | 1  | ,027 | ,352   |
| VASTY2(29)              | -1,106 | ,407 | 7,398   | 1  | ,007 | ,331   |
| VASTY2(30)              | -,146  | ,317 | ,212    | 1  | ,645 | ,864   |
| VASTY2(31)              | ,541   | ,284 | 3,632   | 1  | ,057 | 1,718  |
| VASTY2(32)              | -,055  | ,320 | ,030    | 1  | ,863 | ,946   |
| VASTY2(33)              | ,034   | ,313 | ,012    | 1  | ,913 | 1,035  |
| VASTY2(34)              | -1,254 | ,439 | 8,181   | 1  | ,004 | ,285   |
| VASTY2(35)              | ,688   | ,276 | 6,204   | 1  | ,013 | 1,991  |
| weekday                 |        |      | 13,128  | 6  | ,041 |        |
| weekday(1)              | -,007  | ,129 | ,003    | 1  | ,958 | ,993   |
| weekday(2)              | -,028  | ,130 | ,047    | 1  | ,828 | ,972   |

## Variables in the Equation

|                     |            | 95% C.I. for EXP(B) |       |
|---------------------|------------|---------------------|-------|
|                     |            | Lower               | Upper |
| Step 1 <sup>a</sup> | sv3        |                     |       |
|                     | sv3(1)     | ,797                | 1,212 |
|                     | sv3(2)     | ,935                | 1,405 |
|                     | VASTY2     |                     |       |
|                     | VASTY2(1)  | ,591                | 1,918 |
|                     | VASTY2(2)  | ,961                | 2,863 |
|                     | VASTY2(3)  | ,101                | ,628  |
|                     | VASTY2(4)  | ,700                | 2,202 |
|                     | VASTY2(5)  | ,464                | 1,669 |
|                     | VASTY2(6)  | ,112                | ,632  |
|                     | VASTY2(7)  | 1,128               | 3,283 |
|                     | VASTY2(8)  | ,449                | 1,578 |
|                     | VASTY2(9)  | ,776                | 2,424 |
|                     | VASTY2(10) | 1,608               | 4,523 |
|                     | VASTY2(11) | 1,104               | 3,211 |
|                     | VASTY2(12) | ,618                | 1,987 |
|                     | VASTY2(13) | 1,592               | 4,498 |
|                     | VASTY2(14) | ,413                | 1,456 |
|                     | VASTY2(15) | ,696                | 2,190 |
|                     | VASTY2(16) | ,768                | 2,811 |
|                     | VASTY2(17) | ,148                | ,764  |
|                     | VASTY2(18) | ,258                | 1,106 |
|                     | VASTY2(19) | ,059                | ,509  |
|                     | VASTY2(20) | ,558                | 1,917 |
|                     | VASTY2(21) | ,501                | 1,704 |
|                     | VASTY2(22) | ,725                | 2,260 |
|                     | VASTY2(23) | ,751                | 2,324 |
|                     | VASTY2(24) | ,777                | 2,376 |
|                     | VASTY2(25) | ,761                | 2,484 |
|                     | VASTY2(26) | ,175                | ,904  |
|                     | VASTY2(27) | ,092                | ,571  |
|                     | VASTY2(28) | ,140                | ,888  |
|                     | VASTY2(29) | ,149                | ,734  |
|                     | VASTY2(30) | ,465                | 1,608 |
|                     | VASTY2(31) | ,985                | 2,997 |
|                     | VASTY2(32) | ,505                | 1,772 |
|                     | VASTY2(33) | ,560                | 1,913 |
|                     | VASTY2(34) | ,121                | ,674  |
|                     | VASTY2(35) | 1,158               | 3,422 |
|                     | weekday    |                     |       |
|                     | weekday(1) | ,771                | 1,279 |
|                     | weekday(2) | ,753                | 1,254 |

Variables in the Equation

|            | B      | S.E. | Wald    | df | Sig. | Exp(B) |
|------------|--------|------|---------|----|------|--------|
| weekday(3) | -,039  | ,131 | ,087    | 1  | ,768 | ,962   |
| weekday(4) | ,042   | ,129 | ,108    | 1  | ,743 | 1,043  |
| weekday(5) | -,239  | ,139 | 2,932   | 1  | ,087 | ,788   |
| weekday(6) | -,376  | ,143 | 6,871   | 1  | ,009 | ,687   |
| holiday(1) | -,451  | ,253 | 3,175   | 1  | ,075 | ,637   |
| season     |        |      | 4,327   | 4  | ,364 |        |
| season(1)  | -,120  | ,113 | 1,130   | 1  | ,288 | ,886   |
| season(2)  | -,137  | ,106 | 1,687   | 1  | ,194 | ,872   |
| season(3)  | ,061   | ,108 | ,322    | 1  | ,570 | 1,063  |
| season(4)  | -,084  | ,115 | ,537    | 1  | ,463 | ,919   |
| Constant   | -2,572 | ,244 | 110,717 | 1  | ,000 | ,076   |

Variables in the Equation

|            | 95% C.I. for EXP(B) |       |
|------------|---------------------|-------|
|            | Lower               | Upper |
| weekday(3) | ,745                | 1,243 |
| weekday(4) | ,810                | 1,344 |
| weekday(5) | ,599                | 1,035 |
| weekday(6) | ,518                | ,910  |
| holiday(1) | ,388                | 1,046 |
| season     |                     |       |
| season(1)  | ,710                | 1,107 |
| season(2)  | ,709                | 1,072 |
| season(3)  | ,860                | 1,315 |
| season(4)  | ,734                | 1,152 |
| Constant   |                     |       |

a. Variable(s) entered on step 1: sv3, VASTY2, weekday, holiday, season.

```
LOGISTIC REGRESSION VARIABLES luonnelt1
/METHOD=ENTER sv5 VASTY2 weekday holiday season
/CONTRAST (sv5)=Indicator(1)
/CONTRAST (VASTY2)=Indicator(1)
/CONTRAST (weekday)=Indicator(1)
/CONTRAST (holiday)=Indicator(1)
/CONTRAST (season)=Indicator(1)
/PRINT=CI(95)
/CRITERIA=PIN(0.05) POUT(0.10) ITERATE(20) CUT(0.5).
```

## Logistic Regression

[DataSet6] C:\cWordjan\Rafaela\_VCS\alla\_tillsammans\abo\_bjo\_vasa\_v1.sav



### Case Processing Summary

| Unweighted Cases <sup>a</sup> |                      | N     | Percent |
|-------------------------------|----------------------|-------|---------|
| Selected Cases                | Included in Analysis | 12475 | 100,0   |
|                               | Missing Cases        | 0     | ,0      |
|                               | Total                | 12475 | 100,0   |
| Unselected Cases              |                      | 0     | ,0      |
| Total                         |                      | 12475 | 100,0   |

a. If weight is in effect, see classification table for the total number of cases.

### Dependent Variable Encoding

| Original Value                      | Internal Value |
|-------------------------------------|----------------|
| 0 ingen händelse eller läheltä piti | 0              |
| 1 tapahtui potilaalle               | 1              |

### Categorical Variables Codings

|                                     | Frequency | Parameter |
|-------------------------------------|-----------|-----------|
|                                     |           | (1)       |
| VASTY2 (SAIR*10000)+VASTY 403073101 | 365       | ,000      |
| 403073102                           | 362       | 1,000     |
| 403073103                           | 365       | ,000      |
| 403073202                           | 365       | ,000      |
| 403073203                           | 365       | ,000      |
| 403073204                           | 330       | ,000      |
| 403073303                           | 364       | ,000      |
| 403073651                           | 362       | ,000      |
| 403073771                           | 365       | ,000      |
| 403133102                           | 341       | ,000      |
| 403133106                           | 365       | ,000      |
| 403133107                           | 365       | ,000      |
| 403133109                           | 365       | ,000      |
| 403133202                           | 365       | ,000      |
| 403133203                           | 365       | ,000      |
| 403133204                           | 365       | ,000      |
| 403133315                           | 177       | ,000      |
| 403133322                           | 365       | ,000      |
| 403133401                           | 362       | ,000      |
| 403133402                           | 365       | ,000      |
| 403133550                           | 298       | ,000      |
| 403133772                           | 365       | ,000      |
| 403135803                           | 365       | ,000      |
| 404060001                           | 365       | ,000      |
| 404060002                           | 366       | ,000      |
| 404310003                           | 291       | ,000      |
| 404310004                           | 291       | ,000      |

## Categorical Variables Codings

|                           |           | Parameter coding |       |
|---------------------------|-----------|------------------|-------|
|                           |           | (2)              | (3)   |
| VASTY2 (SAIR*10000)+VASTY | 403073101 | ,000             | ,000  |
|                           | 403073102 | ,000             | ,000  |
|                           | 403073103 | 1,000            | ,000  |
|                           | 403073202 | ,000             | 1,000 |
|                           | 403073203 | ,000             | ,000  |
|                           | 403073204 | ,000             | ,000  |
|                           | 403073303 | ,000             | ,000  |
|                           | 403073651 | ,000             | ,000  |
|                           | 403073771 | ,000             | ,000  |
|                           | 403133102 | ,000             | ,000  |
|                           | 403133106 | ,000             | ,000  |
|                           | 403133107 | ,000             | ,000  |
|                           | 403133109 | ,000             | ,000  |
|                           | 403133202 | ,000             | ,000  |
|                           | 403133203 | ,000             | ,000  |
|                           | 403133204 | ,000             | ,000  |
|                           | 403133315 | ,000             | ,000  |
|                           | 403133322 | ,000             | ,000  |
|                           | 403133401 | ,000             | ,000  |
|                           | 403133402 | ,000             | ,000  |
|                           | 403133550 | ,000             | ,000  |
|                           | 403133772 | ,000             | ,000  |
|                           | 403135803 | ,000             | ,000  |
|                           | 404060001 | ,000             | ,000  |
|                           | 404060002 | ,000             | ,000  |
|                           | 404310003 | ,000             | ,000  |
|                           | 404310004 | ,000             | ,000  |

**Categorical Variables Codings**

|                           |           | Parameter coding |       |
|---------------------------|-----------|------------------|-------|
|                           |           | (4)              | (5)   |
| VASTY2 (SAIR*10000)+VASTY | 403073101 | ,000             | ,000  |
|                           | 403073102 | ,000             | ,000  |
|                           | 403073103 | ,000             | ,000  |
|                           | 403073202 | ,000             | ,000  |
|                           | 403073203 | 1,000            | ,000  |
|                           | 403073204 | ,000             | 1,000 |
|                           | 403073303 | ,000             | ,000  |
|                           | 403073651 | ,000             | ,000  |
|                           | 403073771 | ,000             | ,000  |
|                           | 403133102 | ,000             | ,000  |
|                           | 403133106 | ,000             | ,000  |
|                           | 403133107 | ,000             | ,000  |
|                           | 403133109 | ,000             | ,000  |
|                           | 403133202 | ,000             | ,000  |
|                           | 403133203 | ,000             | ,000  |
|                           | 403133204 | ,000             | ,000  |
|                           | 403133315 | ,000             | ,000  |
|                           | 403133322 | ,000             | ,000  |
|                           | 403133401 | ,000             | ,000  |
|                           | 403133402 | ,000             | ,000  |
|                           | 403133550 | ,000             | ,000  |
|                           | 403133772 | ,000             | ,000  |
|                           | 403135803 | ,000             | ,000  |
|                           | 404060001 | ,000             | ,000  |
|                           | 404060002 | ,000             | ,000  |
|                           | 404310003 | ,000             | ,000  |
|                           | 404310004 | ,000             | ,000  |

BMJ

## Categorical Variables Codings

|                           |           | Parameter coding |       |
|---------------------------|-----------|------------------|-------|
|                           |           | (6)              | (7)   |
| VASTY2 (SAIR*10000)+VASTY | 403073101 | ,000             | ,000  |
|                           | 403073102 | ,000             | ,000  |
|                           | 403073103 | ,000             | ,000  |
|                           | 403073202 | ,000             | ,000  |
|                           | 403073203 | ,000             | ,000  |
|                           | 403073204 | ,000             | ,000  |
|                           | 403073303 | 1,000            | ,000  |
|                           | 403073651 | ,000             | 1,000 |
|                           | 403073771 | ,000             | ,000  |
|                           | 403133102 | ,000             | ,000  |
|                           | 403133106 | ,000             | ,000  |
|                           | 403133107 | ,000             | ,000  |
|                           | 403133109 | ,000             | ,000  |
|                           | 403133202 | ,000             | ,000  |
|                           | 403133203 | ,000             | ,000  |
|                           | 403133204 | ,000             | ,000  |
|                           | 403133315 | ,000             | ,000  |
|                           | 403133322 | ,000             | ,000  |
|                           | 403133401 | ,000             | ,000  |
|                           | 403133402 | ,000             | ,000  |
|                           | 403133550 | ,000             | ,000  |
|                           | 403133772 | ,000             | ,000  |
|                           | 403135803 | ,000             | ,000  |
|                           | 404060001 | ,000             | ,000  |
|                           | 404060002 | ,000             | ,000  |
|                           | 404310003 | ,000             | ,000  |
|                           | 404310004 | ,000             | ,000  |

**Categorical Variables Codings**

|                           |           | Parameter coding |       |
|---------------------------|-----------|------------------|-------|
|                           |           | (8)              | (9)   |
| VASTY2 (SAIR*10000)+VASTY | 403073101 | ,000             | ,000  |
|                           | 403073102 | ,000             | ,000  |
|                           | 403073103 | ,000             | ,000  |
|                           | 403073202 | ,000             | ,000  |
|                           | 403073203 | ,000             | ,000  |
|                           | 403073204 | ,000             | ,000  |
|                           | 403073303 | ,000             | ,000  |
|                           | 403073651 | ,000             | ,000  |
|                           | 403073771 | 1,000            | ,000  |
|                           | 403133102 | ,000             | 1,000 |
|                           | 403133106 | ,000             | ,000  |
|                           | 403133107 | ,000             | ,000  |
|                           | 403133109 | ,000             | ,000  |
|                           | 403133202 | ,000             | ,000  |
|                           | 403133203 | ,000             | ,000  |
|                           | 403133204 | ,000             | ,000  |
|                           | 403133315 | ,000             | ,000  |
|                           | 403133322 | ,000             | ,000  |
|                           | 403133401 | ,000             | ,000  |
|                           | 403133402 | ,000             | ,000  |
|                           | 403133550 | ,000             | ,000  |
|                           | 403133772 | ,000             | ,000  |
|                           | 403135803 | ,000             | ,000  |
|                           | 404060001 | ,000             | ,000  |
|                           | 404060002 | ,000             | ,000  |
|                           | 404310003 | ,000             | ,000  |
|                           | 404310004 | ,000             | ,000  |

BMJ

## Categorical Variables Codings

|                           |           | Parameter coding |       |
|---------------------------|-----------|------------------|-------|
|                           |           | (10)             | (11)  |
| VASTY2 (SAIR*10000)+VASTY | 403073101 | ,000             | ,000  |
|                           | 403073102 | ,000             | ,000  |
|                           | 403073103 | ,000             | ,000  |
|                           | 403073202 | ,000             | ,000  |
|                           | 403073203 | ,000             | ,000  |
|                           | 403073204 | ,000             | ,000  |
|                           | 403073303 | ,000             | ,000  |
|                           | 403073651 | ,000             | ,000  |
|                           | 403073771 | ,000             | ,000  |
|                           | 403133102 | ,000             | ,000  |
|                           | 403133106 | 1,000            | ,000  |
|                           | 403133107 | ,000             | 1,000 |
|                           | 403133109 | ,000             | ,000  |
|                           | 403133202 | ,000             | ,000  |
|                           | 403133203 | ,000             | ,000  |
|                           | 403133204 | ,000             | ,000  |
|                           | 403133315 | ,000             | ,000  |
|                           | 403133322 | ,000             | ,000  |
|                           | 403133401 | ,000             | ,000  |
|                           | 403133402 | ,000             | ,000  |
|                           | 403133550 | ,000             | ,000  |
|                           | 403133772 | ,000             | ,000  |
|                           | 403135803 | ,000             | ,000  |
|                           | 404060001 | ,000             | ,000  |
|                           | 404060002 | ,000             | ,000  |
|                           | 404310003 | ,000             | ,000  |
|                           | 404310004 | ,000             | ,000  |

1  
2  
3  
4  
5  
6  
7  
8  
9  
10  
11  
12  
13  
14  
15  
16  
17  
18  
19  
20  
21  
22  
23  
24  
25  
26  
27  
28  
29  
30  
31  
32  
33  
34  
35  
36  
37  
38  
39  
40  
41  
42  
43  
44  
45  
46  
47  
48  
49  
50  
51  
52  
53  
54  
55  
56  
57  
58  
59  
60

**Categorical Variables Codings**

|                           |           | Parameter coding |       |
|---------------------------|-----------|------------------|-------|
|                           |           | (12)             | (13)  |
| VASTY2 (SAIR*10000)+VASTY | 403073101 | ,000             | ,000  |
|                           | 403073102 | ,000             | ,000  |
|                           | 403073103 | ,000             | ,000  |
|                           | 403073202 | ,000             | ,000  |
|                           | 403073203 | ,000             | ,000  |
|                           | 403073204 | ,000             | ,000  |
|                           | 403073303 | ,000             | ,000  |
|                           | 403073651 | ,000             | ,000  |
|                           | 403073771 | ,000             | ,000  |
|                           | 403133102 | ,000             | ,000  |
|                           | 403133106 | ,000             | ,000  |
|                           | 403133107 | ,000             | ,000  |
|                           | 403133109 | 1,000            | ,000  |
|                           | 403133202 | ,000             | 1,000 |
|                           | 403133203 | ,000             | ,000  |
|                           | 403133204 | ,000             | ,000  |
|                           | 403133315 | ,000             | ,000  |
|                           | 403133322 | ,000             | ,000  |
|                           | 403133401 | ,000             | ,000  |
|                           | 403133402 | ,000             | ,000  |
|                           | 403133550 | ,000             | ,000  |
|                           | 403133772 | ,000             | ,000  |
|                           | 403135803 | ,000             | ,000  |
|                           | 404060001 | ,000             | ,000  |
|                           | 404060002 | ,000             | ,000  |
|                           | 404310003 | ,000             | ,000  |
|                           | 404310004 | ,000             | ,000  |

## Categorical Variables Codings

|                           |           | Parameter coding |       |
|---------------------------|-----------|------------------|-------|
|                           |           | (14)             | (15)  |
| VASTY2 (SAIR*10000)+VASTY | 403073101 | ,000             | ,000  |
|                           | 403073102 | ,000             | ,000  |
|                           | 403073103 | ,000             | ,000  |
|                           | 403073202 | ,000             | ,000  |
|                           | 403073203 | ,000             | ,000  |
|                           | 403073204 | ,000             | ,000  |
|                           | 403073303 | ,000             | ,000  |
|                           | 403073651 | ,000             | ,000  |
|                           | 403073771 | ,000             | ,000  |
|                           | 403133102 | ,000             | ,000  |
|                           | 403133106 | ,000             | ,000  |
|                           | 403133107 | ,000             | ,000  |
|                           | 403133109 | ,000             | ,000  |
|                           | 403133202 | ,000             | ,000  |
|                           | 403133203 | 1,000            | ,000  |
|                           | 403133204 | ,000             | 1,000 |
|                           | 403133315 | ,000             | ,000  |
|                           | 403133322 | ,000             | ,000  |
|                           | 403133401 | ,000             | ,000  |
|                           | 403133402 | ,000             | ,000  |
|                           | 403133550 | ,000             | ,000  |
|                           | 403133772 | ,000             | ,000  |
|                           | 403135803 | ,000             | ,000  |
|                           | 404060001 | ,000             | ,000  |
|                           | 404060002 | ,000             | ,000  |
|                           | 404310003 | ,000             | ,000  |
|                           | 404310004 | ,000             | ,000  |



## Categorical Variables Codings

|                           |           | Parameter coding |       |
|---------------------------|-----------|------------------|-------|
|                           |           | (16)             | (17)  |
| VASTY2 (SAIR*10000)+VASTY | 403073101 | ,000             | ,000  |
|                           | 403073102 | ,000             | ,000  |
|                           | 403073103 | ,000             | ,000  |
|                           | 403073202 | ,000             | ,000  |
|                           | 403073203 | ,000             | ,000  |
|                           | 403073204 | ,000             | ,000  |
|                           | 403073303 | ,000             | ,000  |
|                           | 403073651 | ,000             | ,000  |
|                           | 403073771 | ,000             | ,000  |
|                           | 403133102 | ,000             | ,000  |
|                           | 403133106 | ,000             | ,000  |
|                           | 403133107 | ,000             | ,000  |
|                           | 403133109 | ,000             | ,000  |
|                           | 403133202 | ,000             | ,000  |
|                           | 403133203 | ,000             | ,000  |
|                           | 403133204 | ,000             | ,000  |
|                           | 403133315 | 1,000            | ,000  |
|                           | 403133322 | ,000             | 1,000 |
|                           | 403133401 | ,000             | ,000  |
|                           | 403133402 | ,000             | ,000  |
|                           | 403133550 | ,000             | ,000  |
|                           | 403133772 | ,000             | ,000  |
|                           | 403135803 | ,000             | ,000  |
|                           | 404060001 | ,000             | ,000  |
|                           | 404060002 | ,000             | ,000  |
|                           | 404310003 | ,000             | ,000  |
|                           | 404310004 | ,000             | ,000  |

## Categorical Variables Codings

|                           |           | Parameter coding |       |
|---------------------------|-----------|------------------|-------|
|                           |           | (18)             | (19)  |
| VASTY2 (SAIR*10000)+VASTY | 403073101 | ,000             | ,000  |
|                           | 403073102 | ,000             | ,000  |
|                           | 403073103 | ,000             | ,000  |
|                           | 403073202 | ,000             | ,000  |
|                           | 403073203 | ,000             | ,000  |
|                           | 403073204 | ,000             | ,000  |
|                           | 403073303 | ,000             | ,000  |
|                           | 403073651 | ,000             | ,000  |
|                           | 403073771 | ,000             | ,000  |
|                           | 403133102 | ,000             | ,000  |
|                           | 403133106 | ,000             | ,000  |
|                           | 403133107 | ,000             | ,000  |
|                           | 403133109 | ,000             | ,000  |
|                           | 403133202 | ,000             | ,000  |
|                           | 403133203 | ,000             | ,000  |
|                           | 403133204 | ,000             | ,000  |
|                           | 403133315 | ,000             | ,000  |
|                           | 403133322 | ,000             | ,000  |
|                           | 403133401 | 1,000            | ,000  |
|                           | 403133402 | ,000             | 1,000 |
|                           | 403133550 | ,000             | ,000  |
|                           | 403133772 | ,000             | ,000  |
|                           | 403135803 | ,000             | ,000  |
|                           | 404060001 | ,000             | ,000  |
|                           | 404060002 | ,000             | ,000  |
|                           | 404310003 | ,000             | ,000  |
|                           | 404310004 | ,000             | ,000  |

**Categorical Variables Codings**

|                           |           | Parameter coding |       |
|---------------------------|-----------|------------------|-------|
|                           |           | (20)             | (21)  |
| VASTY2 (SAIR*10000)+VASTY | 403073101 | ,000             | ,000  |
|                           | 403073102 | ,000             | ,000  |
|                           | 403073103 | ,000             | ,000  |
|                           | 403073202 | ,000             | ,000  |
|                           | 403073203 | ,000             | ,000  |
|                           | 403073204 | ,000             | ,000  |
|                           | 403073303 | ,000             | ,000  |
|                           | 403073651 | ,000             | ,000  |
|                           | 403073771 | ,000             | ,000  |
|                           | 403133102 | ,000             | ,000  |
|                           | 403133106 | ,000             | ,000  |
|                           | 403133107 | ,000             | ,000  |
|                           | 403133109 | ,000             | ,000  |
|                           | 403133202 | ,000             | ,000  |
|                           | 403133203 | ,000             | ,000  |
|                           | 403133204 | ,000             | ,000  |
|                           | 403133315 | ,000             | ,000  |
|                           | 403133322 | ,000             | ,000  |
|                           | 403133401 | ,000             | ,000  |
|                           | 403133402 | ,000             | ,000  |
|                           | 403133550 | 1,000            | ,000  |
|                           | 403133772 | ,000             | 1,000 |
|                           | 403135803 | ,000             | ,000  |
|                           | 404060001 | ,000             | ,000  |
|                           | 404060002 | ,000             | ,000  |
|                           | 404310003 | ,000             | ,000  |
|                           | 404310004 | ,000             | ,000  |

BMJ

## Categorical Variables Codings

|                           |           | Parameter coding |       |
|---------------------------|-----------|------------------|-------|
|                           |           | (22)             | (23)  |
| VASTY2 (SAIR*10000)+VASTY | 403073101 | ,000             | ,000  |
|                           | 403073102 | ,000             | ,000  |
|                           | 403073103 | ,000             | ,000  |
|                           | 403073202 | ,000             | ,000  |
|                           | 403073203 | ,000             | ,000  |
|                           | 403073204 | ,000             | ,000  |
|                           | 403073303 | ,000             | ,000  |
|                           | 403073651 | ,000             | ,000  |
|                           | 403073771 | ,000             | ,000  |
|                           | 403133102 | ,000             | ,000  |
|                           | 403133106 | ,000             | ,000  |
|                           | 403133107 | ,000             | ,000  |
|                           | 403133109 | ,000             | ,000  |
|                           | 403133202 | ,000             | ,000  |
|                           | 403133203 | ,000             | ,000  |
|                           | 403133204 | ,000             | ,000  |
|                           | 403133315 | ,000             | ,000  |
|                           | 403133322 | ,000             | ,000  |
|                           | 403133401 | ,000             | ,000  |
|                           | 403133402 | ,000             | ,000  |
|                           | 403133550 | ,000             | ,000  |
|                           | 403133772 | ,000             | ,000  |
|                           | 403135803 | 1,000            | ,000  |
|                           | 404060001 | ,000             | 1,000 |
|                           | 404060002 | ,000             | ,000  |
|                           | 404310003 | ,000             | ,000  |
|                           | 404310004 | ,000             | ,000  |

1  
2  
3  
4  
5  
6  
7  
8  
9  
10  
11  
12  
13  
14  
15  
16  
17  
18  
19  
20  
21  
22  
23  
24  
25  
26  
27  
28  
29  
30  
31  
32  
33  
34  
35  
36  
37  
38  
39  
40  
41  
42  
43  
44  
45  
46  
47  
48  
49  
50  
51  
52  
53  
54  
55  
56  
57  
58  
59  
60

**Categorical Variables Codings**

|                           |           | Parameter coding |       |
|---------------------------|-----------|------------------|-------|
|                           |           | (24)             | (25)  |
| VASTY2 (SAIR*10000)+VASTY | 403073101 | ,000             | ,000  |
|                           | 403073102 | ,000             | ,000  |
|                           | 403073103 | ,000             | ,000  |
|                           | 403073202 | ,000             | ,000  |
|                           | 403073203 | ,000             | ,000  |
|                           | 403073204 | ,000             | ,000  |
|                           | 403073303 | ,000             | ,000  |
|                           | 403073651 | ,000             | ,000  |
|                           | 403073771 | ,000             | ,000  |
|                           | 403133102 | ,000             | ,000  |
|                           | 403133106 | ,000             | ,000  |
|                           | 403133107 | ,000             | ,000  |
|                           | 403133109 | ,000             | ,000  |
|                           | 403133202 | ,000             | ,000  |
|                           | 403133203 | ,000             | ,000  |
|                           | 403133204 | ,000             | ,000  |
|                           | 403133315 | ,000             | ,000  |
|                           | 403133322 | ,000             | ,000  |
|                           | 403133401 | ,000             | ,000  |
|                           | 403133402 | ,000             | ,000  |
|                           | 403133550 | ,000             | ,000  |
|                           | 403133772 | ,000             | ,000  |
|                           | 403135803 | ,000             | ,000  |
|                           | 404060001 | ,000             | ,000  |
|                           | 404060002 | 1,000            | ,000  |
|                           | 404310003 | ,000             | 1,000 |
|                           | 404310004 | ,000             | ,000  |

## Categorical Variables Codings

|                           |           | Parameter coding |      |
|---------------------------|-----------|------------------|------|
|                           |           | (26)             | (27) |
| VASTY2 (SAIR*10000)+VASTY | 403073101 | ,000             | ,000 |
|                           | 403073102 | ,000             | ,000 |
|                           | 403073103 | ,000             | ,000 |
|                           | 403073202 | ,000             | ,000 |
|                           | 403073203 | ,000             | ,000 |
|                           | 403073204 | ,000             | ,000 |
|                           | 403073303 | ,000             | ,000 |
|                           | 403073651 | ,000             | ,000 |
|                           | 403073771 | ,000             | ,000 |
|                           | 403133102 | ,000             | ,000 |
|                           | 403133106 | ,000             | ,000 |
|                           | 403133107 | ,000             | ,000 |
|                           | 403133109 | ,000             | ,000 |
|                           | 403133202 | ,000             | ,000 |
|                           | 403133203 | ,000             | ,000 |
|                           | 403133204 | ,000             | ,000 |
|                           | 403133315 | ,000             | ,000 |
|                           | 403133322 | ,000             | ,000 |
|                           | 403133401 | ,000             | ,000 |
|                           | 403133402 | ,000             | ,000 |
|                           | 403133550 | ,000             | ,000 |
|                           | 403133772 | ,000             | ,000 |
|                           | 403135803 | ,000             | ,000 |
|                           | 404060001 | ,000             | ,000 |
|                           | 404060002 | ,000             | ,000 |
|                           | 404310003 | ,000             | ,000 |
|                           | 404310004 | 1,000            | ,000 |

1  
2  
3  
4  
5  
6  
7  
8  
9  
10  
11  
12  
13  
14  
15  
16  
17  
18  
19  
20  
21  
22  
23  
24  
25  
26  
27  
28  
29  
30  
31  
32  
33  
34  
35  
36  
37  
38  
39  
40  
41  
42  
43  
44  
45  
46  
47  
48  
49  
50  
51  
52  
53  
54  
55  
56  
57  
58  
59  
60

**Categorical Variables Codings**

|                           |           | Parameter coding |      |
|---------------------------|-----------|------------------|------|
|                           |           | (28)             | (29) |
| VASTY2 (SAIR*10000)+VASTY | 403073101 | ,000             | ,000 |
|                           | 403073102 | ,000             | ,000 |
|                           | 403073103 | ,000             | ,000 |
|                           | 403073202 | ,000             | ,000 |
|                           | 403073203 | ,000             | ,000 |
|                           | 403073204 | ,000             | ,000 |
|                           | 403073303 | ,000             | ,000 |
|                           | 403073651 | ,000             | ,000 |
|                           | 403073771 | ,000             | ,000 |
|                           | 403133102 | ,000             | ,000 |
|                           | 403133106 | ,000             | ,000 |
|                           | 403133107 | ,000             | ,000 |
|                           | 403133109 | ,000             | ,000 |
|                           | 403133202 | ,000             | ,000 |
|                           | 403133203 | ,000             | ,000 |
|                           | 403133204 | ,000             | ,000 |
|                           | 403133315 | ,000             | ,000 |
|                           | 403133322 | ,000             | ,000 |
|                           | 403133401 | ,000             | ,000 |
|                           | 403133402 | ,000             | ,000 |
|                           | 403133550 | ,000             | ,000 |
|                           | 403133772 | ,000             | ,000 |
|                           | 403135803 | ,000             | ,000 |
|                           | 404060001 | ,000             | ,000 |
|                           | 404060002 | ,000             | ,000 |
|                           | 404310003 | ,000             | ,000 |
|                           | 404310004 | ,000             | ,000 |

## Categorical Variables Codings

|                           |           | Parameter coding |      |
|---------------------------|-----------|------------------|------|
|                           |           | (30)             | (31) |
| VASTY2 (SAIR*10000)+VASTY | 403073101 | ,000             | ,000 |
|                           | 403073102 | ,000             | ,000 |
|                           | 403073103 | ,000             | ,000 |
|                           | 403073202 | ,000             | ,000 |
|                           | 403073203 | ,000             | ,000 |
|                           | 403073204 | ,000             | ,000 |
|                           | 403073303 | ,000             | ,000 |
|                           | 403073651 | ,000             | ,000 |
|                           | 403073771 | ,000             | ,000 |
|                           | 403133102 | ,000             | ,000 |
|                           | 403133106 | ,000             | ,000 |
|                           | 403133107 | ,000             | ,000 |
|                           | 403133109 | ,000             | ,000 |
|                           | 403133202 | ,000             | ,000 |
|                           | 403133203 | ,000             | ,000 |
|                           | 403133204 | ,000             | ,000 |
|                           | 403133315 | ,000             | ,000 |
|                           | 403133322 | ,000             | ,000 |
|                           | 403133401 | ,000             | ,000 |
|                           | 403133402 | ,000             | ,000 |
|                           | 403133550 | ,000             | ,000 |
|                           | 403133772 | ,000             | ,000 |
|                           | 403135803 | ,000             | ,000 |
|                           | 404060001 | ,000             | ,000 |
|                           | 404060002 | ,000             | ,000 |
|                           | 404310003 | ,000             | ,000 |
|                           | 404310004 | ,000             | ,000 |



1  
2  
3  
4  
5  
6  
7  
8  
9  
10  
11  
12  
13  
14  
15  
16  
17  
18  
19  
20  
21  
22  
23  
24  
25  
26  
27  
28  
29  
30  
31  
32  
33  
34  
35  
36  
37  
38  
39  
40  
41  
42  
43  
44  
45  
46  
47  
48  
49  
50  
51  
52  
53  
54  
55  
56  
57  
58  
59  
60

**Categorical Variables Codings**

|                           |           | Parameter coding |      |
|---------------------------|-----------|------------------|------|
|                           |           | (32)             | (33) |
| VASTY2 (SAIR*10000)+VASTY | 403073101 | ,000             | ,000 |
|                           | 403073102 | ,000             | ,000 |
|                           | 403073103 | ,000             | ,000 |
|                           | 403073202 | ,000             | ,000 |
|                           | 403073203 | ,000             | ,000 |
|                           | 403073204 | ,000             | ,000 |
|                           | 403073303 | ,000             | ,000 |
|                           | 403073651 | ,000             | ,000 |
|                           | 403073771 | ,000             | ,000 |
|                           | 403133102 | ,000             | ,000 |
|                           | 403133106 | ,000             | ,000 |
|                           | 403133107 | ,000             | ,000 |
|                           | 403133109 | ,000             | ,000 |
|                           | 403133202 | ,000             | ,000 |
|                           | 403133203 | ,000             | ,000 |
|                           | 403133204 | ,000             | ,000 |
|                           | 403133315 | ,000             | ,000 |
|                           | 403133322 | ,000             | ,000 |
|                           | 403133401 | ,000             | ,000 |
|                           | 403133402 | ,000             | ,000 |
|                           | 403133550 | ,000             | ,000 |
|                           | 403133772 | ,000             | ,000 |
|                           | 403135803 | ,000             | ,000 |
|                           | 404060001 | ,000             | ,000 |
|                           | 404060002 | ,000             | ,000 |
|                           | 404310003 | ,000             | ,000 |
|                           | 404310004 | ,000             | ,000 |

## Categorical Variables Codings

|                           |           | Parameter coding |      |
|---------------------------|-----------|------------------|------|
|                           |           | (34)             | (35) |
| VASTY2 (SAIR*10000)+VASTY | 403073101 | ,000             | ,000 |
|                           | 403073102 | ,000             | ,000 |
|                           | 403073103 | ,000             | ,000 |
|                           | 403073202 | ,000             | ,000 |
|                           | 403073203 | ,000             | ,000 |
|                           | 403073204 | ,000             | ,000 |
|                           | 403073303 | ,000             | ,000 |
|                           | 403073651 | ,000             | ,000 |
|                           | 403073771 | ,000             | ,000 |
|                           | 403133102 | ,000             | ,000 |
|                           | 403133106 | ,000             | ,000 |
|                           | 403133107 | ,000             | ,000 |
|                           | 403133109 | ,000             | ,000 |
|                           | 403133202 | ,000             | ,000 |
|                           | 403133203 | ,000             | ,000 |
|                           | 403133204 | ,000             | ,000 |
|                           | 403133315 | ,000             | ,000 |
|                           | 403133322 | ,000             | ,000 |
|                           | 403133401 | ,000             | ,000 |
|                           | 403133402 | ,000             | ,000 |
|                           | 403133550 | ,000             | ,000 |
|                           | 403133772 | ,000             | ,000 |
|                           | 403135803 | ,000             | ,000 |
|                           | 404060001 | ,000             | ,000 |
|                           | 404060002 | ,000             | ,000 |
|                           | 404310003 | ,000             | ,000 |
|                           | 404310004 | ,000             | ,000 |

## Categorical Variables Codings

|                            |                                         | Frequency | Parameter<br>(1) |
|----------------------------|-----------------------------------------|-----------|------------------|
|                            | 502300005                               | 366       | ,000             |
|                            | 502300006                               | 225       | ,000             |
|                            | 502300007                               | 366       | ,000             |
|                            | 502300214                               | 366       | ,000             |
|                            | 502300411                               | 366       | ,000             |
|                            | 502300415                               | 360       | ,000             |
|                            | 502300416                               | 363       | ,000             |
|                            | 502300811                               | 364       | ,000             |
|                            | 502300913                               | 315       | ,000             |
| weekday veckodag           | 1 måndag                                | 1805      | ,000             |
|                            | 2 tisdag                                | 1812      | 1,000            |
|                            | 3 onsdag                                | 1800      | ,000             |
|                            | 4 torsdag                               | 1794      | ,000             |
|                            | 5 fredag                                | 1788      | ,000             |
|                            | 6 lördag                                | 1735      | ,000             |
|                            | 7 söndag                                | 1741      | ,000             |
| season säsong/period       | 1 januari-mars                          | 3182      | ,000             |
|                            | 2 april-maj                             | 2127      | 1,000            |
|                            | 3 juni-augusti                          | 2911      | ,000             |
|                            | 4 september-oktober                     | 2144      | ,000             |
|                            | 5 november-december                     | 2111      | ,000             |
| sv5 kvintiler för standard | 1 tredje kvintilen                      | 1863      | ,000             |
|                            | 2 första kvintilen                      | 3570      | 1,000            |
|                            | 3 andra kvintilen                       | 1759      | ,000             |
|                            | 4 fjärde kvintilen                      | 2327      | ,000             |
|                            | 5 femte kvintilen                       | 2956      | ,000             |
| holiday större helg        | 1 ingen större helg                     | 12078     | ,000             |
|                            | 2 större helg (påsk/midsommar/julonyår) | 397       | 1,000            |

## Categorical Variables Codings

|                            |                                         | Parameter coding |       |
|----------------------------|-----------------------------------------|------------------|-------|
|                            |                                         | (2)              | (3)   |
|                            | 502300005                               | ,000             | ,000  |
|                            | 502300006                               | ,000             | ,000  |
|                            | 502300007                               | ,000             | ,000  |
|                            | 502300214                               | ,000             | ,000  |
|                            | 502300411                               | ,000             | ,000  |
|                            | 502300415                               | ,000             | ,000  |
|                            | 502300416                               | ,000             | ,000  |
|                            | 502300811                               | ,000             | ,000  |
|                            | 502300913                               | ,000             | ,000  |
| weekday veckodag           | 1 måndag                                | ,000             | ,000  |
|                            | 2 tisdag                                | ,000             | ,000  |
|                            | 3 onsdag                                | 1,000            | ,000  |
|                            | 4 torsdag                               | ,000             | 1,000 |
|                            | 5 fredag                                | ,000             | ,000  |
|                            | 6 lördag                                | ,000             | ,000  |
|                            | 7 söndag                                | ,000             | ,000  |
| season säsong/period       | 1 januari-mars                          | ,000             | ,000  |
|                            | 2 april-maj                             | ,000             | ,000  |
|                            | 3 juni-augusti                          | 1,000            | ,000  |
|                            | 4 september-oktober                     | ,000             | 1,000 |
|                            | 5 november-december                     | ,000             | ,000  |
| sv5 kvintiler för standard | 1 tredje kvintilen                      | ,000             | ,000  |
|                            | 2 första kvintilen                      | ,000             | ,000  |
|                            | 3 andra kvintilen                       | 1,000            | ,000  |
|                            | 4 fjärde kvintilen                      | ,000             | 1,000 |
|                            | 5 femte kvintilen                       | ,000             | ,000  |
| holiday större helg        | 1 ingen större helg                     |                  |       |
|                            | 2 större helg (påsk/midsommar/julonyår) |                  |       |

## Categorical Variables Codings

|                            |                                         | Parameter coding |       |
|----------------------------|-----------------------------------------|------------------|-------|
|                            |                                         | (4)              | (5)   |
|                            | 502300005                               | ,000             | ,000  |
|                            | 502300006                               | ,000             | ,000  |
|                            | 502300007                               | ,000             | ,000  |
|                            | 502300214                               | ,000             | ,000  |
|                            | 502300411                               | ,000             | ,000  |
|                            | 502300415                               | ,000             | ,000  |
|                            | 502300416                               | ,000             | ,000  |
|                            | 502300811                               | ,000             | ,000  |
|                            | 502300913                               | ,000             | ,000  |
| weekday veckodag           | 1 måndag                                | ,000             | ,000  |
|                            | 2 tisdag                                | ,000             | ,000  |
|                            | 3 onsdag                                | ,000             | ,000  |
|                            | 4 torsdag                               | ,000             | ,000  |
|                            | 5 fredag                                | 1,000            | ,000  |
|                            | 6 lördag                                | ,000             | 1,000 |
|                            | 7 söndag                                | ,000             | ,000  |
| season säsong/period       | 1 januari-mars                          | ,000             |       |
|                            | 2 april-maj                             | ,000             |       |
|                            | 3 juni-augusti                          | ,000             |       |
|                            | 4 september-oktober                     | ,000             |       |
|                            | 5 november-december                     | 1,000            |       |
| sv5 kvintiler för standard | 1 tredje kvintilen                      | ,000             |       |
|                            | 2 första kvintilen                      | ,000             |       |
|                            | 3 andra kvintilen                       | ,000             |       |
|                            | 4 fjärde kvintilen                      | ,000             |       |
|                            | 5 femte kvintilen                       | 1,000            |       |
| holiday större helg        | 1 ingen större helg                     |                  |       |
|                            | 2 större helg (påsk/midsommar/julonyår) |                  |       |

## Categorical Variables Codings

|                            |                                         | Parameter coding |      |
|----------------------------|-----------------------------------------|------------------|------|
|                            |                                         | (6)              | (7)  |
|                            | 502300005                               | ,000             | ,000 |
|                            | 502300006                               | ,000             | ,000 |
|                            | 502300007                               | ,000             | ,000 |
|                            | 502300214                               | ,000             | ,000 |
|                            | 502300411                               | ,000             | ,000 |
|                            | 502300415                               | ,000             | ,000 |
|                            | 502300416                               | ,000             | ,000 |
|                            | 502300811                               | ,000             | ,000 |
|                            | 502300913                               | ,000             | ,000 |
| weekday veckodag           | 1 måndag                                | ,000             |      |
|                            | 2 tisdag                                | ,000             |      |
|                            | 3 onsdag                                | ,000             |      |
|                            | 4 torsdag                               | ,000             |      |
|                            | 5 fredag                                | ,000             |      |
|                            | 6 lördag                                | ,000             |      |
|                            | 7 söndag                                | 1,000            |      |
| season säsong/period       | 1 januari-mars                          |                  |      |
|                            | 2 april-maj                             |                  |      |
|                            | 3 juni-augusti                          |                  |      |
|                            | 4 september-oktober                     |                  |      |
|                            | 5 november-december                     |                  |      |
| sv5 kvintiler för standard | 1 tredje kvintilen                      |                  |      |
|                            | 2 första kvintilen                      |                  |      |
|                            | 3 andra kvintilen                       |                  |      |
|                            | 4 fjärde kvintilen                      |                  |      |
|                            | 5 femte kvintilen                       |                  |      |
| holiday större helg        | 1 ingen större helg                     |                  |      |
|                            | 2 större helg (påsk/midsommar/julonyår) |                  |      |

## Categorical Variables Codings

|                            |                                         | Parameter coding |      |
|----------------------------|-----------------------------------------|------------------|------|
|                            |                                         | (8)              | (9)  |
|                            | 502300005                               | ,000             | ,000 |
|                            | 502300006                               | ,000             | ,000 |
|                            | 502300007                               | ,000             | ,000 |
|                            | 502300214                               | ,000             | ,000 |
|                            | 502300411                               | ,000             | ,000 |
|                            | 502300415                               | ,000             | ,000 |
|                            | 502300416                               | ,000             | ,000 |
|                            | 502300811                               | ,000             | ,000 |
|                            | 502300913                               | ,000             | ,000 |
| weekday veckodag           | 1 måndag                                |                  |      |
|                            | 2 tisdag                                |                  |      |
|                            | 3 onsdag                                |                  |      |
|                            | 4 torsdag                               |                  |      |
|                            | 5 fredag                                |                  |      |
|                            | 6 lördag                                |                  |      |
|                            | 7 söndag                                |                  |      |
| season säsong/period       | 1 januari-mars                          |                  |      |
|                            | 2 april-maj                             |                  |      |
|                            | 3 juni-augusti                          |                  |      |
|                            | 4 september-oktober                     |                  |      |
|                            | 5 november-december                     |                  |      |
| sv5 kvintiler för standard | 1 tredje kvintilen                      |                  |      |
|                            | 2 första kvintilen                      |                  |      |
|                            | 3 andra kvintilen                       |                  |      |
|                            | 4 fjärde kvintilen                      |                  |      |
|                            | 5 femte kvintilen                       |                  |      |
| holiday större helg        | 1 ingen större helg                     |                  |      |
|                            | 2 större helg (påsk/midsommar/julonyår) |                  |      |

## Categorical Variables Codings

|                            |                                         | Parameter coding |      |
|----------------------------|-----------------------------------------|------------------|------|
|                            |                                         | (10)             | (11) |
|                            | 502300005                               | ,000             | ,000 |
|                            | 502300006                               | ,000             | ,000 |
|                            | 502300007                               | ,000             | ,000 |
|                            | 502300214                               | ,000             | ,000 |
|                            | 502300411                               | ,000             | ,000 |
|                            | 502300415                               | ,000             | ,000 |
|                            | 502300416                               | ,000             | ,000 |
|                            | 502300811                               | ,000             | ,000 |
|                            | 502300913                               | ,000             | ,000 |
| weekday veckodag           | 1 måndag                                |                  |      |
|                            | 2 tisdag                                |                  |      |
|                            | 3 onsdag                                |                  |      |
|                            | 4 torsdag                               |                  |      |
|                            | 5 fredag                                |                  |      |
|                            | 6 lördag                                |                  |      |
|                            | 7 söndag                                |                  |      |
| season säsong/period       | 1 januari-mars                          |                  |      |
|                            | 2 april-maj                             |                  |      |
|                            | 3 juni-augusti                          |                  |      |
|                            | 4 september-oktober                     |                  |      |
|                            | 5 november-december                     |                  |      |
| sv5 kvintiler för standard | 1 tredje kvintilen                      |                  |      |
|                            | 2 första kvintilen                      |                  |      |
|                            | 3 andra kvintilen                       |                  |      |
|                            | 4 fjärde kvintilen                      |                  |      |
|                            | 5 femte kvintilen                       |                  |      |
| holiday större helg        | 1 ingen större helg                     |                  |      |
|                            | 2 större helg (påsk/midsommar/julonyår) |                  |      |



## Categorical Variables Codings

|                            |                                         | Parameter coding |      |
|----------------------------|-----------------------------------------|------------------|------|
|                            |                                         | (12)             | (13) |
|                            | 502300005                               | ,000             | ,000 |
|                            | 502300006                               | ,000             | ,000 |
|                            | 502300007                               | ,000             | ,000 |
|                            | 502300214                               | ,000             | ,000 |
|                            | 502300411                               | ,000             | ,000 |
|                            | 502300415                               | ,000             | ,000 |
|                            | 502300416                               | ,000             | ,000 |
|                            | 502300811                               | ,000             | ,000 |
|                            | 502300913                               | ,000             | ,000 |
| weekday veckodag           | 1 måndag                                |                  |      |
|                            | 2 tisdag                                |                  |      |
|                            | 3 onsdag                                |                  |      |
|                            | 4 torsdag                               |                  |      |
|                            | 5 fredag                                |                  |      |
|                            | 6 lördag                                |                  |      |
|                            | 7 söndag                                |                  |      |
| season säsong/period       | 1 januari-mars                          |                  |      |
|                            | 2 april-maj                             |                  |      |
|                            | 3 juni-augusti                          |                  |      |
|                            | 4 september-oktober                     |                  |      |
|                            | 5 november-december                     |                  |      |
| sv5 kvintiler för standard | 1 tredje kvintilen                      |                  |      |
|                            | 2 första kvintilen                      |                  |      |
|                            | 3 andra kvintilen                       |                  |      |
|                            | 4 fjärde kvintilen                      |                  |      |
|                            | 5 femte kvintilen                       |                  |      |
| holiday större helg        | 1 ingen större helg                     |                  |      |
|                            | 2 större helg (påsk/midsommar/julonyår) |                  |      |

## Categorical Variables Codings

|                            |                                         | Parameter coding |      |
|----------------------------|-----------------------------------------|------------------|------|
|                            |                                         | (14)             | (15) |
|                            | 502300005                               | ,000             | ,000 |
|                            | 502300006                               | ,000             | ,000 |
|                            | 502300007                               | ,000             | ,000 |
|                            | 502300214                               | ,000             | ,000 |
|                            | 502300411                               | ,000             | ,000 |
|                            | 502300415                               | ,000             | ,000 |
|                            | 502300416                               | ,000             | ,000 |
|                            | 502300811                               | ,000             | ,000 |
|                            | 502300913                               | ,000             | ,000 |
| weekday veckodag           | 1 måndag                                |                  |      |
|                            | 2 tisdag                                |                  |      |
|                            | 3 onsdag                                |                  |      |
|                            | 4 torsdag                               |                  |      |
|                            | 5 fredag                                |                  |      |
|                            | 6 lördag                                |                  |      |
|                            | 7 söndag                                |                  |      |
| season säsong/period       | 1 januari-mars                          |                  |      |
|                            | 2 april-maj                             |                  |      |
|                            | 3 juni-augusti                          |                  |      |
|                            | 4 september-oktober                     |                  |      |
|                            | 5 november-december                     |                  |      |
| sv5 kvintiler för standard | 1 tredje kvintilen                      |                  |      |
|                            | 2 första kvintilen                      |                  |      |
|                            | 3 andra kvintilen                       |                  |      |
|                            | 4 fjärde kvintilen                      |                  |      |
|                            | 5 femte kvintilen                       |                  |      |
| holiday större helg        | 1 ingen större helg                     |                  |      |
|                            | 2 större helg (påsk/midsommar/julonyår) |                  |      |

## Categorical Variables Codings

|                            |                                         | Parameter coding |      |
|----------------------------|-----------------------------------------|------------------|------|
|                            |                                         | (16)             | (17) |
|                            | 502300005                               | ,000             | ,000 |
|                            | 502300006                               | ,000             | ,000 |
|                            | 502300007                               | ,000             | ,000 |
|                            | 502300214                               | ,000             | ,000 |
|                            | 502300411                               | ,000             | ,000 |
|                            | 502300415                               | ,000             | ,000 |
|                            | 502300416                               | ,000             | ,000 |
|                            | 502300811                               | ,000             | ,000 |
|                            | 502300913                               | ,000             | ,000 |
| weekday veckodag           | 1 måndag                                |                  |      |
|                            | 2 tisdag                                |                  |      |
|                            | 3 onsdag                                |                  |      |
|                            | 4 torsdag                               |                  |      |
|                            | 5 fredag                                |                  |      |
|                            | 6 lördag                                |                  |      |
|                            | 7 söndag                                |                  |      |
| season säsong/period       | 1 januari-mars                          |                  |      |
|                            | 2 april-maj                             |                  |      |
|                            | 3 juni-augusti                          |                  |      |
|                            | 4 september-oktober                     |                  |      |
|                            | 5 november-december                     |                  |      |
| sv5 kvintiler för standard | 1 tredje kvintilen                      |                  |      |
|                            | 2 första kvintilen                      |                  |      |
|                            | 3 andra kvintilen                       |                  |      |
|                            | 4 fjärde kvintilen                      |                  |      |
|                            | 5 femte kvintilen                       |                  |      |
| holiday större helg        | 1 ingen större helg                     |                  |      |
|                            | 2 större helg (påsk/midsommar/julonyår) |                  |      |

## Categorical Variables Codings

|                            |                                         | Parameter coding |      |
|----------------------------|-----------------------------------------|------------------|------|
|                            |                                         | (18)             | (19) |
|                            | 502300005                               | ,000             | ,000 |
|                            | 502300006                               | ,000             | ,000 |
|                            | 502300007                               | ,000             | ,000 |
|                            | 502300214                               | ,000             | ,000 |
|                            | 502300411                               | ,000             | ,000 |
|                            | 502300415                               | ,000             | ,000 |
|                            | 502300416                               | ,000             | ,000 |
|                            | 502300811                               | ,000             | ,000 |
|                            | 502300913                               | ,000             | ,000 |
| weekday veckodag           | 1 måndag                                |                  |      |
|                            | 2 tisdag                                |                  |      |
|                            | 3 onsdag                                |                  |      |
|                            | 4 torsdag                               |                  |      |
|                            | 5 fredag                                |                  |      |
|                            | 6 lördag                                |                  |      |
|                            | 7 söndag                                |                  |      |
| season säsong/period       | 1 januari-mars                          |                  |      |
|                            | 2 april-maj                             |                  |      |
|                            | 3 juni-augusti                          |                  |      |
|                            | 4 september-oktober                     |                  |      |
|                            | 5 november-december                     |                  |      |
| sv5 kvintiler för standard | 1 tredje kvintilen                      |                  |      |
|                            | 2 första kvintilen                      |                  |      |
|                            | 3 andra kvintilen                       |                  |      |
|                            | 4 fjärde kvintilen                      |                  |      |
|                            | 5 femte kvintilen                       |                  |      |
| holiday större helg        | 1 ingen större helg                     |                  |      |
|                            | 2 större helg (påsk/midsommar/julonyår) |                  |      |

## Categorical Variables Codings

|                            |                                         | Parameter coding |      |
|----------------------------|-----------------------------------------|------------------|------|
|                            |                                         | (20)             | (21) |
|                            | 502300005                               | ,000             | ,000 |
|                            | 502300006                               | ,000             | ,000 |
|                            | 502300007                               | ,000             | ,000 |
|                            | 502300214                               | ,000             | ,000 |
|                            | 502300411                               | ,000             | ,000 |
|                            | 502300415                               | ,000             | ,000 |
|                            | 502300416                               | ,000             | ,000 |
|                            | 502300811                               | ,000             | ,000 |
|                            | 502300913                               | ,000             | ,000 |
| weekday veckodag           | 1 måndag                                |                  |      |
|                            | 2 tisdag                                |                  |      |
|                            | 3 onsdag                                |                  |      |
|                            | 4 torsdag                               |                  |      |
|                            | 5 fredag                                |                  |      |
|                            | 6 lördag                                |                  |      |
|                            | 7 söndag                                |                  |      |
| season säsong/period       | 1 januari-mars                          |                  |      |
|                            | 2 april-maj                             |                  |      |
|                            | 3 juni-augusti                          |                  |      |
|                            | 4 september-oktober                     |                  |      |
|                            | 5 november-december                     |                  |      |
| sv5 kvintiler för standard | 1 tredje kvintilen                      |                  |      |
|                            | 2 första kvintilen                      |                  |      |
|                            | 3 andra kvintilen                       |                  |      |
|                            | 4 fjärde kvintilen                      |                  |      |
|                            | 5 femte kvintilen                       |                  |      |
| holiday större helg        | 1 ingen större helg                     |                  |      |
|                            | 2 större helg (påsk/midsommar/julonyår) |                  |      |

## Categorical Variables Codings

|                            |                                         | Parameter coding |      |
|----------------------------|-----------------------------------------|------------------|------|
|                            |                                         | (22)             | (23) |
|                            | 502300005                               | ,000             | ,000 |
|                            | 502300006                               | ,000             | ,000 |
|                            | 502300007                               | ,000             | ,000 |
|                            | 502300214                               | ,000             | ,000 |
|                            | 502300411                               | ,000             | ,000 |
|                            | 502300415                               | ,000             | ,000 |
|                            | 502300416                               | ,000             | ,000 |
|                            | 502300811                               | ,000             | ,000 |
|                            | 502300913                               | ,000             | ,000 |
| weekday veckodag           | 1 måndag                                |                  |      |
|                            | 2 tisdag                                |                  |      |
|                            | 3 onsdag                                |                  |      |
|                            | 4 torsdag                               |                  |      |
|                            | 5 fredag                                |                  |      |
|                            | 6 lördag                                |                  |      |
|                            | 7 söndag                                |                  |      |
| season säsong/period       | 1 januari-mars                          |                  |      |
|                            | 2 april-maj                             |                  |      |
|                            | 3 juni-augusti                          |                  |      |
|                            | 4 september-oktober                     |                  |      |
|                            | 5 november-december                     |                  |      |
| sv5 kvintiler för standard | 1 tredje kvintilen                      |                  |      |
|                            | 2 första kvintilen                      |                  |      |
|                            | 3 andra kvintilen                       |                  |      |
|                            | 4 fjärde kvintilen                      |                  |      |
|                            | 5 femte kvintilen                       |                  |      |
| holiday större helg        | 1 ingen större helg                     |                  |      |
|                            | 2 större helg (påsk/midsommar/julonyår) |                  |      |

## Categorical Variables Codings

|                            |                                         | Parameter coding |      |
|----------------------------|-----------------------------------------|------------------|------|
|                            |                                         | (24)             | (25) |
|                            | 502300005                               | ,000             | ,000 |
|                            | 502300006                               | ,000             | ,000 |
|                            | 502300007                               | ,000             | ,000 |
|                            | 502300214                               | ,000             | ,000 |
|                            | 502300411                               | ,000             | ,000 |
|                            | 502300415                               | ,000             | ,000 |
|                            | 502300416                               | ,000             | ,000 |
|                            | 502300811                               | ,000             | ,000 |
|                            | 502300913                               | ,000             | ,000 |
| weekday veckodag           | 1 måndag                                |                  |      |
|                            | 2 tisdag                                |                  |      |
|                            | 3 onsdag                                |                  |      |
|                            | 4 torsdag                               |                  |      |
|                            | 5 fredag                                |                  |      |
|                            | 6 lördag                                |                  |      |
|                            | 7 söndag                                |                  |      |
| season säsong/period       | 1 januari-mars                          |                  |      |
|                            | 2 april-maj                             |                  |      |
|                            | 3 juni-augusti                          |                  |      |
|                            | 4 september-oktober                     |                  |      |
|                            | 5 november-december                     |                  |      |
| sv5 kvintiler för standard | 1 tredje kvintilen                      |                  |      |
|                            | 2 första kvintilen                      |                  |      |
|                            | 3 andra kvintilen                       |                  |      |
|                            | 4 fjärde kvintilen                      |                  |      |
|                            | 5 femte kvintilen                       |                  |      |
| holiday större helg        | 1 ingen större helg                     |                  |      |
|                            | 2 större helg (påsk/midsommar/julonyår) |                  |      |

## Categorical Variables Codings

|                            |                                         | Parameter coding |       |
|----------------------------|-----------------------------------------|------------------|-------|
|                            |                                         | (26)             | (27)  |
|                            | 502300005                               | ,000             | 1,000 |
|                            | 502300006                               | ,000             | ,000  |
|                            | 502300007                               | ,000             | ,000  |
|                            | 502300214                               | ,000             | ,000  |
|                            | 502300411                               | ,000             | ,000  |
|                            | 502300415                               | ,000             | ,000  |
|                            | 502300416                               | ,000             | ,000  |
|                            | 502300811                               | ,000             | ,000  |
|                            | 502300913                               | ,000             | ,000  |
| weekday veckodag           | 1 måndag                                |                  |       |
|                            | 2 tisdag                                |                  |       |
|                            | 3 onsdag                                |                  |       |
|                            | 4 torsdag                               |                  |       |
|                            | 5 fredag                                |                  |       |
|                            | 6 lördag                                |                  |       |
|                            | 7 söndag                                |                  |       |
| season säsong/period       | 1 januari-mars                          |                  |       |
|                            | 2 april-maj                             |                  |       |
|                            | 3 juni-augusti                          |                  |       |
|                            | 4 september-oktober                     |                  |       |
|                            | 5 november-december                     |                  |       |
| sv5 kvintiler för standard | 1 tredje kvintilen                      |                  |       |
|                            | 2 första kvintilen                      |                  |       |
|                            | 3 andra kvintilen                       |                  |       |
|                            | 4 fjärde kvintilen                      |                  |       |
|                            | 5 femte kvintilen                       |                  |       |
| holiday större helg        | 1 ingen större helg                     |                  |       |
|                            | 2 större helg (påsk/midsommar/julonyår) |                  |       |



## Categorical Variables Codings

|                            |                                         | Parameter coding |       |
|----------------------------|-----------------------------------------|------------------|-------|
|                            |                                         | (28)             | (29)  |
|                            | 502300005                               | ,000             | ,000  |
|                            | 502300006                               | 1,000            | ,000  |
|                            | 502300007                               | ,000             | 1,000 |
|                            | 502300214                               | ,000             | ,000  |
|                            | 502300411                               | ,000             | ,000  |
|                            | 502300415                               | ,000             | ,000  |
|                            | 502300416                               | ,000             | ,000  |
|                            | 502300811                               | ,000             | ,000  |
|                            | 502300913                               | ,000             | ,000  |
| weekday veckodag           | 1 måndag                                |                  |       |
|                            | 2 tisdag                                |                  |       |
|                            | 3 onsdag                                |                  |       |
|                            | 4 torsdag                               |                  |       |
|                            | 5 fredag                                |                  |       |
|                            | 6 lördag                                |                  |       |
|                            | 7 söndag                                |                  |       |
| season säsong/period       | 1 januari-mars                          |                  |       |
|                            | 2 april-maj                             |                  |       |
|                            | 3 juni-augusti                          |                  |       |
|                            | 4 september-oktober                     |                  |       |
|                            | 5 november-december                     |                  |       |
| sv5 kvintiler för standard | 1 tredje kvintilen                      |                  |       |
|                            | 2 första kvintilen                      |                  |       |
|                            | 3 andra kvintilen                       |                  |       |
|                            | 4 fjärde kvintilen                      |                  |       |
|                            | 5 femte kvintilen                       |                  |       |
| holiday större helg        | 1 ingen större helg                     |                  |       |
|                            | 2 större helg (påsk/midsommar/julonyår) |                  |       |

## Categorical Variables Codings

|                            |                                         | Parameter coding |       |
|----------------------------|-----------------------------------------|------------------|-------|
|                            |                                         | (30)             | (31)  |
|                            | 502300005                               | ,000             | ,000  |
|                            | 502300006                               | ,000             | ,000  |
|                            | 502300007                               | ,000             | ,000  |
|                            | 502300214                               | 1,000            | ,000  |
|                            | 502300411                               | ,000             | 1,000 |
|                            | 502300415                               | ,000             | ,000  |
|                            | 502300416                               | ,000             | ,000  |
|                            | 502300811                               | ,000             | ,000  |
|                            | 502300913                               | ,000             | ,000  |
| weekday veckodag           | 1 måndag                                |                  |       |
|                            | 2 tisdag                                |                  |       |
|                            | 3 onsdag                                |                  |       |
|                            | 4 torsdag                               |                  |       |
|                            | 5 fredag                                |                  |       |
|                            | 6 lördag                                |                  |       |
|                            | 7 söndag                                |                  |       |
| season säsong/period       | 1 januari-mars                          |                  |       |
|                            | 2 april-maj                             |                  |       |
|                            | 3 juni-augusti                          |                  |       |
|                            | 4 september-oktober                     |                  |       |
|                            | 5 november-december                     |                  |       |
| sv5 kvintiler för standard | 1 tredje kvintilen                      |                  |       |
|                            | 2 första kvintilen                      |                  |       |
|                            | 3 andra kvintilen                       |                  |       |
|                            | 4 fjärde kvintilen                      |                  |       |
|                            | 5 femte kvintilen                       |                  |       |
| holiday större helg        | 1 ingen större helg                     |                  |       |
|                            | 2 större helg (påsk/midsommar/julonyår) |                  |       |

## Categorical Variables Codings

|                            |                                         | Parameter coding |       |
|----------------------------|-----------------------------------------|------------------|-------|
|                            |                                         | (32)             | (33)  |
|                            | 502300005                               | ,000             | ,000  |
|                            | 502300006                               | ,000             | ,000  |
|                            | 502300007                               | ,000             | ,000  |
|                            | 502300214                               | ,000             | ,000  |
|                            | 502300411                               | ,000             | ,000  |
|                            | 502300415                               | 1,000            | ,000  |
|                            | 502300416                               | ,000             | 1,000 |
|                            | 502300811                               | ,000             | ,000  |
|                            | 502300913                               | ,000             | ,000  |
| weekday veckodag           | 1 måndag                                |                  |       |
|                            | 2 tisdag                                |                  |       |
|                            | 3 onsdag                                |                  |       |
|                            | 4 torsdag                               |                  |       |
|                            | 5 fredag                                |                  |       |
|                            | 6 lördag                                |                  |       |
|                            | 7 söndag                                |                  |       |
| season säsong/period       | 1 januari-mars                          |                  |       |
|                            | 2 april-maj                             |                  |       |
|                            | 3 juni-augusti                          |                  |       |
|                            | 4 september-oktober                     |                  |       |
|                            | 5 november-december                     |                  |       |
| sv5 kvintiler för standard | 1 tredje kvintilen                      |                  |       |
|                            | 2 första kvintilen                      |                  |       |
|                            | 3 andra kvintilen                       |                  |       |
|                            | 4 fjärde kvintilen                      |                  |       |
|                            | 5 femte kvintilen                       |                  |       |
| holiday större helg        | 1 ingen större helg                     |                  |       |
|                            | 2 större helg (påsk/midsommar/julonyår) |                  |       |

## Categorical Variables Codings

|                            |                                         | Parameter coding |       |
|----------------------------|-----------------------------------------|------------------|-------|
|                            |                                         | (34)             | (35)  |
|                            | 502300005                               | ,000             | ,000  |
|                            | 502300006                               | ,000             | ,000  |
|                            | 502300007                               | ,000             | ,000  |
|                            | 502300214                               | ,000             | ,000  |
|                            | 502300411                               | ,000             | ,000  |
|                            | 502300415                               | ,000             | ,000  |
|                            | 502300416                               | ,000             | ,000  |
|                            | 502300811                               | 1,000            | ,000  |
|                            | 502300913                               | ,000             | 1,000 |
| weekday veckodag           | 1 måndag                                |                  |       |
|                            | 2 tisdag                                |                  |       |
|                            | 3 onsdag                                |                  |       |
|                            | 4 torsdag                               |                  |       |
|                            | 5 fredag                                |                  |       |
|                            | 6 lördag                                |                  |       |
|                            | 7 söndag                                |                  |       |
| season säsong/period       | 1 januari-mars                          |                  |       |
|                            | 2 april-maj                             |                  |       |
|                            | 3 juni-augusti                          |                  |       |
|                            | 4 september-oktober                     |                  |       |
|                            | 5 november-december                     |                  |       |
| sv5 kvintiler för standard | 1 tredje kvintilen                      |                  |       |
|                            | 2 första kvintilen                      |                  |       |
|                            | 3 andra kvintilen                       |                  |       |
|                            | 4 fjärde kvintilen                      |                  |       |
|                            | 5 femte kvintilen                       |                  |       |
| holiday större helg        | 1 ingen större helg                     |                  |       |
|                            | 2 större helg (påsk/midsommar/julonyår) |                  |       |

## Block 0: Beginning Block

**Classification Table<sup>a,b</sup>**

| Observed           |                                                |                                                              |
|--------------------|------------------------------------------------|--------------------------------------------------------------|
| Step 0             | luonnelt1 luonne highest = tapahtui potilaalle | 0 ingen händelse eller läheltä piti<br>1 tapahtui potilaalle |
| Overall Percentage |                                                |                                                              |

**Classification Table<sup>a,b</sup>**

| Observed           |                                                |                                                              | Predicted                           |
|--------------------|------------------------------------------------|--------------------------------------------------------------|-------------------------------------|
|                    |                                                |                                                              | luonnelt1 luonne highest = ...      |
|                    |                                                |                                                              | 0 ingen händelse eller läheltä piti |
| Step 0             | luonnelt1 luonne highest = tapahtui potilaalle | 0 ingen händelse eller läheltä piti<br>1 tapahtui potilaalle | 11627<br>848                        |
| Overall Percentage |                                                |                                                              |                                     |

**Classification Table<sup>a,b</sup>**

| Observed           |                                                |                                                              | Predicted                    |
|--------------------|------------------------------------------------|--------------------------------------------------------------|------------------------------|
|                    |                                                |                                                              | luonnelt1 luonne highest ... |
|                    |                                                |                                                              | 1 tapahtui potilaalle        |
| Step 0             | luonnelt1 luonne highest = tapahtui potilaalle | 0 ingen händelse eller läheltä piti<br>1 tapahtui potilaalle | 0<br>0                       |
| Overall Percentage |                                                |                                                              |                              |

**Classification Table<sup>a,b</sup>**

| Observed           |                                                |                                                              | Predicted          |
|--------------------|------------------------------------------------|--------------------------------------------------------------|--------------------|
|                    |                                                |                                                              | Percentage Correct |
| Step 0             | luonnelt1 luonne highest = tapahtui potilaalle | 0 ingen händelse eller läheltä piti<br>1 tapahtui potilaalle | 100,0<br>,0        |
| Overall Percentage |                                                |                                                              | 93,2               |

a. Constant is included in the model.

b. The cut value is ,500

## Variables in the Equation

|                 | B      | S.E. | Wald     | df | Sig. | Exp(B) |
|-----------------|--------|------|----------|----|------|--------|
| Step 0 Constant | -2,618 | ,036 | 5417,889 | 1  | ,000 | ,073   |

## Variables not in the Equation

|                      | Score   | df | Sig. |
|----------------------|---------|----|------|
| Step 0 Variables sv5 | 15,331  | 4  | ,004 |
| sv5(1)               | 10,247  | 1  | ,001 |
| sv5(2)               | ,767    | 1  | ,381 |
| sv5(3)               | 1,370   | 1  | ,242 |
| sv5(4)               | 8,120   | 1  | ,004 |
| VASTY2               | 299,491 | 35 | ,000 |
| VASTY2(1)            | ,007    | 1  | ,934 |
| VASTY2(2)            | 8,968   | 1  | ,003 |
| VASTY2(3)            | 15,764  | 1  | ,000 |
| VASTY2(4)            | ,453    | 1  | ,501 |
| VASTY2(5)            | ,965    | 1  | ,326 |
| VASTY2(6)            | 14,062  | 1  | ,000 |
| VASTY2(7)            | 12,067  | 1  | ,001 |
| VASTY2(8)            | 1,504   | 1  | ,220 |
| VASTY2(9)            | 1,612   | 1  | ,204 |
| VASTY2(10)           | 55,161  | 1  | ,000 |
| VASTY2(11)           | 11,675  | 1  | ,001 |
| VASTY2(12)           | ,213    | 1  | ,644 |
| VASTY2(13)           | 55,161  | 1  | ,000 |
| VASTY2(14)           | 1,504   | 1  | ,220 |
| VASTY2(15)           | 1,199   | 1  | ,273 |
| VASTY2(16)           | 3,222   | 1  | ,073 |
| VASTY2(17)           | 12,590  | 1  | ,000 |
| VASTY2(18)           | 7,137   | 1  | ,008 |
| VASTY2(19)           | 19,294  | 1  | ,000 |
| VASTY2(20)           | ,030    | 1  | ,863 |
| VASTY2(21)           | ,647    | 1  | ,421 |
| VASTY2(22)           | ,782    | 1  | ,377 |
| VASTY2(23)           | 1,199   | 1  | ,273 |
| VASTY2(24)           | 2,253   | 1  | ,133 |
| VASTY2(25)           | 1,513   | 1  | ,219 |
| VASTY2(26)           | 7,708   | 1  | ,005 |
| VASTY2(27)           | 15,836  | 1  | ,000 |
| VASTY2(28)           | 6,172   | 1  | ,013 |
| VASTY2(29)           | 11,203  | 1  | ,001 |
| VASTY2(30)           | 1,058   | 1  | ,304 |
| VASTY2(31)           | 6,527   | 1  | ,011 |
| VASTY2(32)           | ,544    | 1  | ,461 |
| VASTY2(33)           | ,126    | 1  | ,723 |

## Variables not in the Equation

|                    | Score   | df | Sig. |
|--------------------|---------|----|------|
| VASTY2(34)         | 14,062  | 1  | ,000 |
| VASTY2(35)         | 15,901  | 1  | ,000 |
| weekday            | 14,938  | 6  | ,021 |
| weekday(1)         | ,984    | 1  | ,321 |
| weekday(2)         | ,599    | 1  | ,439 |
| weekday(3)         | ,376    | 1  | ,540 |
| weekday(4)         | 1,867   | 1  | ,172 |
| weekday(5)         | 3,400   | 1  | ,065 |
| weekday(6)         | 9,074   | 1  | ,003 |
| holiday(1)         | 3,316   | 1  | ,069 |
| season             | 5,196   | 4  | ,268 |
| season(1)          | ,388    | 1  | ,533 |
| season(2)          | 1,566   | 1  | ,211 |
| season(3)          | 2,964   | 1  | ,085 |
| season(4)          | ,650    | 1  | ,420 |
| Overall Statistics | 326,106 | 50 | ,000 |

## Block 1: Method = Enter

## Omnibus Tests of Model Coefficients

|             | Chi-square | df | Sig. |
|-------------|------------|----|------|
| Step 1 Step | 334,570    | 50 | ,000 |
| Block       | 334,570    | 50 | ,000 |
| Model       | 334,570    | 50 | ,000 |

## Model Summary

| Step | -2 Log likelihood     | Cox & Snell R Square | Nagelkerke R Square |
|------|-----------------------|----------------------|---------------------|
| 1    | 5862,302 <sup>a</sup> | ,026                 | ,068                |

a. Estimation terminated at iteration number 7 because parameter estimates changed by less than ,001.

Classification Table<sup>a</sup>

| Observed           |                                                |                                                              |
|--------------------|------------------------------------------------|--------------------------------------------------------------|
| Step 1             | luonnelt1 luonne highest = tapahtui potilaalle | 0 ingen händelse eller läheltä piti<br>1 tapahtui potilaalle |
| Overall Percentage |                                                |                                                              |

Classification Table<sup>a</sup>

| Observed           |                                                | Predicted                                                    |
|--------------------|------------------------------------------------|--------------------------------------------------------------|
|                    |                                                | luonnelt1 luonne highest = ...                               |
|                    |                                                | 0 ingen händelse eller läheltä piti                          |
| Step 1             | luonnelt1 luonne highest = tapahtui potilaalle | 0 ingen händelse eller läheltä piti<br>1 tapahtui potilaalle |
| Overall Percentage |                                                | 11627<br>848                                                 |

Classification Table<sup>a</sup>

| Observed           |                                                | Predicted                                                    |
|--------------------|------------------------------------------------|--------------------------------------------------------------|
|                    |                                                | luonnelt1 luonne highest ...                                 |
|                    |                                                | 1 tapahtui potilaalle                                        |
| Step 1             | luonnelt1 luonne highest = tapahtui potilaalle | 0 ingen händelse eller läheltä piti<br>1 tapahtui potilaalle |
| Overall Percentage |                                                | 0<br>0                                                       |

Classification Table<sup>a</sup>

| Observed           |                                                | Predicted                                                    |
|--------------------|------------------------------------------------|--------------------------------------------------------------|
|                    |                                                | Percentage Correct                                           |
| Step 1             | luonnelt1 luonne highest = tapahtui potilaalle | 0 ingen händelse eller läheltä piti<br>1 tapahtui potilaalle |
| Overall Percentage |                                                | 100,0<br>,0<br>93,2                                          |

a. The cut value is ,500



## Variables in the Equation

|                     |            | B      | S.E. | Wald    | df | Sig. | Exp(B) |
|---------------------|------------|--------|------|---------|----|------|--------|
| Step 1 <sup>a</sup> | sv5        |        |      | 3,122   | 4  | ,538 |        |
|                     | sv5(1)     | -,028  | ,135 | ,043    | 1  | ,835 | ,972   |
|                     | sv5(2)     | -,011  | ,137 | ,007    | 1  | ,934 | ,989   |
|                     | sv5(3)     | -,003  | ,125 | ,001    | 1  | ,980 | ,997   |
|                     | sv5(4)     | ,179   | ,135 | 1,765   | 1  | ,184 | 1,196  |
|                     | VASTY2     |        |      | 233,751 | 35 | ,000 |        |
|                     | VASTY2(1)  | ,060   | ,300 | ,040    | 1  | ,842 | 1,062  |
|                     | VASTY2(2)  | ,480   | ,281 | 2,925   | 1  | ,087 | 1,616  |
|                     | VASTY2(3)  | -1,387 | ,465 | 8,894   | 1  | ,003 | ,250   |
|                     | VASTY2(4)  | ,215   | ,292 | ,542    | 1  | ,462 | 1,240  |
|                     | VASTY2(5)  | -,146  | ,327 | ,199    | 1  | ,656 | ,865   |
|                     | VASTY2(6)  | -1,377 | ,446 | 9,521   | 1  | ,002 | ,252   |
|                     | VASTY2(7)  | ,652   | ,272 | 5,729   | 1  | ,017 | 1,919  |
|                     | VASTY2(8)  | -,189  | ,321 | ,349    | 1  | ,555 | ,827   |
|                     | VASTY2(9)  | ,320   | ,290 | 1,217   | 1  | ,270 | 1,378  |
|                     | VASTY2(10) | ,961   | ,267 | 12,923  | 1  | ,000 | 2,613  |
|                     | VASTY2(11) | ,627   | ,272 | 5,308   | 1  | ,021 | 1,873  |
|                     | VASTY2(12) | ,095   | ,299 | ,102    | 1  | ,750 | 1,100  |
|                     | VASTY2(13) | ,951   | ,269 | 12,512  | 1  | ,000 | 2,588  |
|                     | VASTY2(14) | -,270  | ,322 | ,700    | 1  | ,403 | ,764   |
|                     | VASTY2(15) | ,189   | ,294 | ,412    | 1  | ,521 | 1,208  |
|                     | VASTY2(16) | ,361   | ,332 | 1,179   | 1  | ,278 | 1,434  |
|                     | VASTY2(17) | -1,100 | ,418 | 6,919   | 1  | ,009 | ,333   |
|                     | VASTY2(18) | -,643  | ,376 | 2,934   | 1  | ,087 | ,525   |
|                     | VASTY2(19) | -1,774 | ,555 | 10,209  | 1  | ,001 | ,170   |
|                     | VASTY2(20) | ,004   | ,317 | ,000    | 1  | ,991 | 1,004  |
|                     | VASTY2(21) | -,089  | ,312 | ,082    | 1  | ,774 | ,914   |
|                     | VASTY2(22) | ,245   | ,290 | ,713    | 1  | ,398 | 1,277  |
|                     | VASTY2(23) | ,270   | ,288 | ,877    | 1  | ,349 | 1,310  |
|                     | VASTY2(24) | ,296   | ,285 | 1,075   | 1  | ,300 | 1,344  |
|                     | VASTY2(25) | ,300   | ,302 | ,982    | 1  | ,322 | 1,349  |
|                     | VASTY2(26) | -,924  | ,419 | 4,862   | 1  | ,027 | ,397   |
|                     | VASTY2(27) | -1,495 | ,468 | 10,220  | 1  | ,001 | ,224   |
|                     | VASTY2(28) | -1,107 | ,477 | 5,401   | 1  | ,020 | ,330   |
|                     | VASTY2(29) | -1,174 | ,413 | 8,084   | 1  | ,004 | ,309   |
|                     | VASTY2(30) | -,156  | ,317 | ,242    | 1  | ,623 | ,856   |
|                     | VASTY2(31) | ,522   | ,287 | 3,313   | 1  | ,069 | 1,686  |
|                     | VASTY2(32) | -,072  | ,325 | ,050    | 1  | ,823 | ,930   |
|                     | VASTY2(33) | ,018   | ,319 | ,003    | 1  | ,956 | 1,018  |
|                     | VASTY2(34) | -1,257 | ,439 | 8,215   | 1  | ,004 | ,285   |
|                     | VASTY2(35) | ,692   | ,277 | 6,254   | 1  | ,012 | 1,998  |
|                     | weekday    |        |      | 13,104  | 6  | ,041 |        |

## Variables in the Equation

|                     |            | 95% C.I. for EXP(B) |       |
|---------------------|------------|---------------------|-------|
|                     |            | Lower               | Upper |
| Step 1 <sup>a</sup> | sv5        |                     |       |
|                     | sv5(1)     | ,747                | 1,266 |
|                     | sv5(2)     | ,757                | 1,292 |
|                     | sv5(3)     | ,781                | 1,273 |
|                     | sv5(4)     | ,918                | 1,557 |
|                     | VASTY2     |                     |       |
|                     | VASTY2(1)  | ,589                | 1,913 |
|                     | VASTY2(2)  | ,932                | 2,802 |
|                     | VASTY2(3)  | ,100                | ,622  |
|                     | VASTY2(4)  | ,699                | 2,199 |
|                     | VASTY2(5)  | ,456                | 1,640 |
|                     | VASTY2(6)  | ,105                | ,605  |
|                     | VASTY2(7)  | 1,125               | 3,273 |
|                     | VASTY2(8)  | ,441                | 1,552 |
|                     | VASTY2(9)  | ,780                | 2,434 |
|                     | VASTY2(10) | 1,548               | 4,412 |
|                     | VASTY2(11) | 1,098               | 3,193 |
|                     | VASTY2(12) | ,613                | 1,975 |
|                     | VASTY2(13) | 1,528               | 4,384 |
|                     | VASTY2(14) | ,406                | 1,436 |
|                     | VASTY2(15) | ,679                | 2,150 |
|                     | VASTY2(16) | ,748                | 2,750 |
|                     | VASTY2(17) | ,147                | ,755  |
|                     | VASTY2(18) | ,252                | 1,097 |
|                     | VASTY2(19) | ,057                | ,504  |
|                     | VASTY2(20) | ,539                | 1,867 |
|                     | VASTY2(21) | ,496                | 1,686 |
|                     | VASTY2(22) | ,724                | 2,255 |
|                     | VASTY2(23) | ,744                | 2,306 |
|                     | VASTY2(24) | ,768                | 2,353 |
|                     | VASTY2(25) | ,746                | 2,440 |
|                     | VASTY2(26) | ,175                | ,902  |
|                     | VASTY2(27) | ,090                | ,561  |
|                     | VASTY2(28) | ,130                | ,841  |
|                     | VASTY2(29) | ,138                | ,694  |
|                     | VASTY2(30) | ,460                | 1,592 |
|                     | VASTY2(31) | ,961                | 2,958 |
|                     | VASTY2(32) | ,492                | 1,758 |
|                     | VASTY2(33) | ,544                | 1,903 |
|                     | VASTY2(34) | ,120                | ,672  |
|                     | VASTY2(35) | 1,161               | 3,436 |
|                     | weekday    |                     |       |

review only

Variables in the Equation

|            | B      | S.E. | Wald    | df | Sig. | Exp(B) |
|------------|--------|------|---------|----|------|--------|
| weekday(1) | -,004  | ,129 | ,001    | 1  | ,976 | ,996   |
| weekday(2) | -,027  | ,130 | ,043    | 1  | ,836 | ,973   |
| weekday(3) | -,040  | ,131 | ,095    | 1  | ,758 | ,961   |
| weekday(4) | ,043   | ,129 | ,111    | 1  | ,739 | 1,044  |
| weekday(5) | -,236  | ,140 | 2,854   | 1  | ,091 | ,790   |
| weekday(6) | -,376  | ,144 | 6,879   | 1  | ,009 | ,686   |
| holiday(1) | -,454  | ,253 | 3,218   | 1  | ,073 | ,635   |
| season     |        |      | 4,099   | 4  | ,393 |        |
| season(1)  | -,118  | ,113 | 1,091   | 1  | ,296 | ,888   |
| season(2)  | -,135  | ,106 | 1,613   | 1  | ,204 | ,874   |
| season(3)  | ,059   | ,108 | ,301    | 1  | ,583 | 1,061  |
| season(4)  | -,080  | ,115 | ,486    | 1  | ,486 | ,923   |
| Constant   | -2,546 | ,252 | 102,291 | 1  | ,000 | ,078   |

Variables in the Equation

|            | 95% C.I. for EXP(B) |       |
|------------|---------------------|-------|
|            | Lower               | Upper |
| weekday(1) | ,773                | 1,283 |
| weekday(2) | ,754                | 1,256 |
| weekday(3) | ,744                | 1,241 |
| weekday(4) | ,810                | 1,345 |
| weekday(5) | ,601                | 1,038 |
| weekday(6) | ,518                | ,909  |
| holiday(1) | ,387                | 1,043 |
| season     |                     |       |
| season(1)  | ,711                | 1,109 |
| season(2)  | ,710                | 1,076 |
| season(3)  | ,858                | 1,312 |
| season(4)  | ,736                | 1,156 |
| Constant   |                     |       |

a. Variable(s) entered on step 1: sv5, VASTY2, weekday, holiday, season.

```
LOGISTIC REGRESSION VARIABLES luonnelt1
/METHOD=ENTER sv7 VASTY2 weekday holiday season
/CONTRAST (sv7)=Indicator(1)
/CONTRAST (VASTY2)=Indicator(1)
/CONTRAST (weekday)=Indicator(1)
/CONTRAST (holiday)=Indicator(1)
/CONTRAST (season)=Indicator(1)
/PRINT=CI(95)
/CRITERIA=PIN(0.05) POUT(0.10) ITERATE(20) CUT(0.5).
```

## Logistic Regression

[DataSet6] C:\cWordjan\Rafaela\_VCS\alla\_tillsammans\abo\_bjo\_vasa\_v1.sav

### Case Processing Summary

| Unweighted Cases <sup>a</sup> |                      | N     | Percent |
|-------------------------------|----------------------|-------|---------|
| Selected Cases                | Included in Analysis | 12475 | 100,0   |
|                               | Missing Cases        | 0     | ,0      |
|                               | Total                | 12475 | 100,0   |
| Unselected Cases              |                      | 0     | ,0      |
| Total                         |                      | 12475 | 100,0   |

a. If weight is in effect, see classification table for the total number of cases.

### Dependent Variable Encoding

| Original Value                      | Internal Value |
|-------------------------------------|----------------|
| 0 ingen händelse eller läheltä piti | 0              |
| 1 tapahtui potilaalle               | 1              |

### Categorical Variables Codings

|                                     | Frequency | Parameter |
|-------------------------------------|-----------|-----------|
|                                     |           | (1)       |
| VASTY2 (SAIR*10000)+VASTY 403073101 | 365       | ,000      |
| 403073102                           | 362       | 1,000     |
| 403073103                           | 365       | ,000      |
| 403073202                           | 365       | ,000      |
| 403073203                           | 365       | ,000      |
| 403073204                           | 330       | ,000      |
| 403073303                           | 364       | ,000      |
| 403073651                           | 362       | ,000      |
| 403073771                           | 365       | ,000      |
| 403133102                           | 341       | ,000      |
| 403133106                           | 365       | ,000      |
| 403133107                           | 365       | ,000      |
| 403133109                           | 365       | ,000      |
| 403133202                           | 365       | ,000      |
| 403133203                           | 365       | ,000      |
| 403133204                           | 365       | ,000      |
| 403133315                           | 177       | ,000      |
| 403133322                           | 365       | ,000      |
| 403133401                           | 362       | ,000      |
| 403133402                           | 365       | ,000      |
| 403133550                           | 298       | ,000      |
| 403133772                           | 365       | ,000      |
| 403135803                           | 365       | ,000      |

**Categorical Variables Codings**

|                           |           | Parameter coding |       |
|---------------------------|-----------|------------------|-------|
|                           |           | (2)              | (3)   |
| VASTY2 (SAIR*10000)+VASTY | 403073101 | ,000             | ,000  |
|                           | 403073102 | ,000             | ,000  |
|                           | 403073103 | 1,000            | ,000  |
|                           | 403073202 | ,000             | 1,000 |
|                           | 403073203 | ,000             | ,000  |
|                           | 403073204 | ,000             | ,000  |
|                           | 403073303 | ,000             | ,000  |
|                           | 403073651 | ,000             | ,000  |
|                           | 403073771 | ,000             | ,000  |
|                           | 403133102 | ,000             | ,000  |
|                           | 403133106 | ,000             | ,000  |
|                           | 403133107 | ,000             | ,000  |
|                           | 403133109 | ,000             | ,000  |
|                           | 403133202 | ,000             | ,000  |
|                           | 403133203 | ,000             | ,000  |
|                           | 403133204 | ,000             | ,000  |
|                           | 403133315 | ,000             | ,000  |
|                           | 403133322 | ,000             | ,000  |
|                           | 403133401 | ,000             | ,000  |
|                           | 403133402 | ,000             | ,000  |
|                           | 403133550 | ,000             | ,000  |
|                           | 403133772 | ,000             | ,000  |
|                           | 403135803 | ,000             | ,000  |

Peer Review Only

## Categorical Variables Codings

|                           |           | Parameter coding |       |
|---------------------------|-----------|------------------|-------|
|                           |           | (4)              | (5)   |
| VASTY2 (SAIR*10000)+VASTY | 403073101 | ,000             | ,000  |
|                           | 403073102 | ,000             | ,000  |
|                           | 403073103 | ,000             | ,000  |
|                           | 403073202 | ,000             | ,000  |
|                           | 403073203 | 1,000            | ,000  |
|                           | 403073204 | ,000             | 1,000 |
|                           | 403073303 | ,000             | ,000  |
|                           | 403073651 | ,000             | ,000  |
|                           | 403073771 | ,000             | ,000  |
|                           | 403133102 | ,000             | ,000  |
|                           | 403133106 | ,000             | ,000  |
|                           | 403133107 | ,000             | ,000  |
|                           | 403133109 | ,000             | ,000  |
|                           | 403133202 | ,000             | ,000  |
|                           | 403133203 | ,000             | ,000  |
|                           | 403133204 | ,000             | ,000  |
|                           | 403133315 | ,000             | ,000  |
|                           | 403133322 | ,000             | ,000  |
|                           | 403133401 | ,000             | ,000  |
|                           | 403133402 | ,000             | ,000  |
|                           | 403133550 | ,000             | ,000  |
|                           | 403133772 | ,000             | ,000  |
|                           | 403135803 | ,000             | ,000  |

## Categorical Variables Codings

|                           |           | Parameter coding |       |
|---------------------------|-----------|------------------|-------|
|                           |           | (6)              | (7)   |
| VASTY2 (SAIR*10000)+VASTY | 403073101 | ,000             | ,000  |
|                           | 403073102 | ,000             | ,000  |
|                           | 403073103 | ,000             | ,000  |
|                           | 403073202 | ,000             | ,000  |
|                           | 403073203 | ,000             | ,000  |
|                           | 403073204 | ,000             | ,000  |
|                           | 403073303 | 1,000            | ,000  |
|                           | 403073651 | ,000             | 1,000 |
|                           | 403073771 | ,000             | ,000  |
|                           | 403133102 | ,000             | ,000  |
|                           | 403133106 | ,000             | ,000  |
|                           | 403133107 | ,000             | ,000  |
|                           | 403133109 | ,000             | ,000  |
|                           | 403133202 | ,000             | ,000  |
|                           | 403133203 | ,000             | ,000  |
|                           | 403133204 | ,000             | ,000  |
|                           | 403133315 | ,000             | ,000  |
|                           | 403133322 | ,000             | ,000  |
|                           | 403133401 | ,000             | ,000  |
|                           | 403133402 | ,000             | ,000  |
|                           | 403133550 | ,000             | ,000  |
|                           | 403133772 | ,000             | ,000  |
|                           | 403135803 | ,000             | ,000  |

## Categorical Variables Codings

|                           |           | Parameter coding |       |
|---------------------------|-----------|------------------|-------|
|                           |           | (8)              | (9)   |
| VASTY2 (SAIR*10000)+VASTY | 403073101 | ,000             | ,000  |
|                           | 403073102 | ,000             | ,000  |
|                           | 403073103 | ,000             | ,000  |
|                           | 403073202 | ,000             | ,000  |
|                           | 403073203 | ,000             | ,000  |
|                           | 403073204 | ,000             | ,000  |
|                           | 403073303 | ,000             | ,000  |
|                           | 403073651 | ,000             | ,000  |
|                           | 403073771 | 1,000            | ,000  |
|                           | 403133102 | ,000             | 1,000 |
|                           | 403133106 | ,000             | ,000  |
|                           | 403133107 | ,000             | ,000  |
|                           | 403133109 | ,000             | ,000  |
|                           | 403133202 | ,000             | ,000  |
|                           | 403133203 | ,000             | ,000  |
|                           | 403133204 | ,000             | ,000  |
|                           | 403133315 | ,000             | ,000  |
|                           | 403133322 | ,000             | ,000  |
|                           | 403133401 | ,000             | ,000  |
|                           | 403133402 | ,000             | ,000  |
|                           | 403133550 | ,000             | ,000  |
|                           | 403133772 | ,000             | ,000  |
|                           | 403135803 | ,000             | ,000  |



## Categorical Variables Codings

|                           |           | Parameter coding |       |
|---------------------------|-----------|------------------|-------|
|                           |           | (10)             | (11)  |
| VASTY2 (SAIR*10000)+VASTY | 403073101 | ,000             | ,000  |
|                           | 403073102 | ,000             | ,000  |
|                           | 403073103 | ,000             | ,000  |
|                           | 403073202 | ,000             | ,000  |
|                           | 403073203 | ,000             | ,000  |
|                           | 403073204 | ,000             | ,000  |
|                           | 403073303 | ,000             | ,000  |
|                           | 403073651 | ,000             | ,000  |
|                           | 403073771 | ,000             | ,000  |
|                           | 403133102 | ,000             | ,000  |
|                           | 403133106 | 1,000            | ,000  |
|                           | 403133107 | ,000             | 1,000 |
|                           | 403133109 | ,000             | ,000  |
|                           | 403133202 | ,000             | ,000  |
|                           | 403133203 | ,000             | ,000  |
|                           | 403133204 | ,000             | ,000  |
|                           | 403133315 | ,000             | ,000  |
|                           | 403133322 | ,000             | ,000  |
|                           | 403133401 | ,000             | ,000  |
|                           | 403133402 | ,000             | ,000  |
|                           | 403133550 | ,000             | ,000  |
|                           | 403133772 | ,000             | ,000  |
|                           | 403135803 | ,000             | ,000  |

## Categorical Variables Codings

|                           |           | Parameter coding |       |
|---------------------------|-----------|------------------|-------|
|                           |           | (12)             | (13)  |
| VASTY2 (SAIR*10000)+VASTY | 403073101 | ,000             | ,000  |
|                           | 403073102 | ,000             | ,000  |
|                           | 403073103 | ,000             | ,000  |
|                           | 403073202 | ,000             | ,000  |
|                           | 403073203 | ,000             | ,000  |
|                           | 403073204 | ,000             | ,000  |
|                           | 403073303 | ,000             | ,000  |
|                           | 403073651 | ,000             | ,000  |
|                           | 403073771 | ,000             | ,000  |
|                           | 403133102 | ,000             | ,000  |
|                           | 403133106 | ,000             | ,000  |
|                           | 403133107 | ,000             | ,000  |
|                           | 403133109 | 1,000            | ,000  |
|                           | 403133202 | ,000             | 1,000 |
|                           | 403133203 | ,000             | ,000  |
|                           | 403133204 | ,000             | ,000  |
|                           | 403133315 | ,000             | ,000  |
|                           | 403133322 | ,000             | ,000  |
|                           | 403133401 | ,000             | ,000  |
|                           | 403133402 | ,000             | ,000  |
|                           | 403133550 | ,000             | ,000  |
|                           | 403133772 | ,000             | ,000  |
|                           | 403135803 | ,000             | ,000  |

## Categorical Variables Codings

|                           |           | Parameter coding |       |
|---------------------------|-----------|------------------|-------|
|                           |           | (14)             | (15)  |
| VASTY2 (SAIR*10000)+VASTY | 403073101 | ,000             | ,000  |
|                           | 403073102 | ,000             | ,000  |
|                           | 403073103 | ,000             | ,000  |
|                           | 403073202 | ,000             | ,000  |
|                           | 403073203 | ,000             | ,000  |
|                           | 403073204 | ,000             | ,000  |
|                           | 403073303 | ,000             | ,000  |
|                           | 403073651 | ,000             | ,000  |
|                           | 403073771 | ,000             | ,000  |
|                           | 403133102 | ,000             | ,000  |
|                           | 403133106 | ,000             | ,000  |
|                           | 403133107 | ,000             | ,000  |
|                           | 403133109 | ,000             | ,000  |
|                           | 403133202 | ,000             | ,000  |
|                           | 403133203 | 1,000            | ,000  |
|                           | 403133204 | ,000             | 1,000 |
|                           | 403133315 | ,000             | ,000  |
|                           | 403133322 | ,000             | ,000  |
|                           | 403133401 | ,000             | ,000  |
|                           | 403133402 | ,000             | ,000  |
|                           | 403133550 | ,000             | ,000  |
|                           | 403133772 | ,000             | ,000  |
|                           | 403135803 | ,000             | ,000  |

## Categorical Variables Codings

|                           |           | Parameter coding |       |
|---------------------------|-----------|------------------|-------|
|                           |           | (16)             | (17)  |
| VASTY2 (SAIR*10000)+VASTY | 403073101 | ,000             | ,000  |
|                           | 403073102 | ,000             | ,000  |
|                           | 403073103 | ,000             | ,000  |
|                           | 403073202 | ,000             | ,000  |
|                           | 403073203 | ,000             | ,000  |
|                           | 403073204 | ,000             | ,000  |
|                           | 403073303 | ,000             | ,000  |
|                           | 403073651 | ,000             | ,000  |
|                           | 403073771 | ,000             | ,000  |
|                           | 403133102 | ,000             | ,000  |
|                           | 403133106 | ,000             | ,000  |
|                           | 403133107 | ,000             | ,000  |
|                           | 403133109 | ,000             | ,000  |
|                           | 403133202 | ,000             | ,000  |
|                           | 403133203 | ,000             | ,000  |
|                           | 403133204 | ,000             | ,000  |
|                           | 403133315 | 1,000            | ,000  |
|                           | 403133322 | ,000             | 1,000 |
|                           | 403133401 | ,000             | ,000  |
|                           | 403133402 | ,000             | ,000  |
|                           | 403133550 | ,000             | ,000  |
|                           | 403133772 | ,000             | ,000  |
|                           | 403135803 | ,000             | ,000  |

## Categorical Variables Codings

|                           |           | Parameter coding |       |
|---------------------------|-----------|------------------|-------|
|                           |           | (18)             | (19)  |
| VASTY2 (SAIR*10000)+VASTY | 403073101 | ,000             | ,000  |
|                           | 403073102 | ,000             | ,000  |
|                           | 403073103 | ,000             | ,000  |
|                           | 403073202 | ,000             | ,000  |
|                           | 403073203 | ,000             | ,000  |
|                           | 403073204 | ,000             | ,000  |
|                           | 403073303 | ,000             | ,000  |
|                           | 403073651 | ,000             | ,000  |
|                           | 403073771 | ,000             | ,000  |
|                           | 403133102 | ,000             | ,000  |
|                           | 403133106 | ,000             | ,000  |
|                           | 403133107 | ,000             | ,000  |
|                           | 403133109 | ,000             | ,000  |
|                           | 403133202 | ,000             | ,000  |
|                           | 403133203 | ,000             | ,000  |
|                           | 403133204 | ,000             | ,000  |
|                           | 403133315 | ,000             | ,000  |
|                           | 403133322 | ,000             | ,000  |
|                           | 403133401 | 1,000            | ,000  |
|                           | 403133402 | ,000             | 1,000 |
|                           | 403133550 | ,000             | ,000  |
|                           | 403133772 | ,000             | ,000  |
|                           | 403135803 | ,000             | ,000  |

## Categorical Variables Codings

|                           |           | Parameter coding |       |
|---------------------------|-----------|------------------|-------|
|                           |           | (20)             | (21)  |
| VASTY2 (SAIR*10000)+VASTY | 403073101 | ,000             | ,000  |
|                           | 403073102 | ,000             | ,000  |
|                           | 403073103 | ,000             | ,000  |
|                           | 403073202 | ,000             | ,000  |
|                           | 403073203 | ,000             | ,000  |
|                           | 403073204 | ,000             | ,000  |
|                           | 403073303 | ,000             | ,000  |
|                           | 403073651 | ,000             | ,000  |
|                           | 403073771 | ,000             | ,000  |
|                           | 403133102 | ,000             | ,000  |
|                           | 403133106 | ,000             | ,000  |
|                           | 403133107 | ,000             | ,000  |
|                           | 403133109 | ,000             | ,000  |
|                           | 403133202 | ,000             | ,000  |
|                           | 403133203 | ,000             | ,000  |
|                           | 403133204 | ,000             | ,000  |
|                           | 403133315 | ,000             | ,000  |
|                           | 403133322 | ,000             | ,000  |
|                           | 403133401 | ,000             | ,000  |
|                           | 403133402 | ,000             | ,000  |
|                           | 403133550 | 1,000            | ,000  |
|                           | 403133772 | ,000             | 1,000 |
|                           | 403135803 | ,000             | ,000  |

**Categorical Variables Codings**

|                           |           | Parameter coding |      |
|---------------------------|-----------|------------------|------|
|                           |           | (22)             | (23) |
| VASTY2 (SAIR*10000)+VASTY | 403073101 | ,000             | ,000 |
|                           | 403073102 | ,000             | ,000 |
|                           | 403073103 | ,000             | ,000 |
|                           | 403073202 | ,000             | ,000 |
|                           | 403073203 | ,000             | ,000 |
|                           | 403073204 | ,000             | ,000 |
|                           | 403073303 | ,000             | ,000 |
|                           | 403073651 | ,000             | ,000 |
|                           | 403073771 | ,000             | ,000 |
|                           | 403133102 | ,000             | ,000 |
|                           | 403133106 | ,000             | ,000 |
|                           | 403133107 | ,000             | ,000 |
|                           | 403133109 | ,000             | ,000 |
|                           | 403133202 | ,000             | ,000 |
|                           | 403133203 | ,000             | ,000 |
|                           | 403133204 | ,000             | ,000 |
|                           | 403133315 | ,000             | ,000 |
|                           | 403133322 | ,000             | ,000 |
|                           | 403133401 | ,000             | ,000 |
|                           | 403133402 | ,000             | ,000 |
|                           | 403133550 | ,000             | ,000 |
|                           | 403133772 | ,000             | ,000 |
|                           | 403135803 | 1,000            | ,000 |

Peer Review Only

## Categorical Variables Codings

|                           |           | Parameter coding |      |
|---------------------------|-----------|------------------|------|
|                           |           | (24)             | (25) |
| VASTY2 (SAIR*10000)+VASTY | 403073101 | ,000             | ,000 |
|                           | 403073102 | ,000             | ,000 |
|                           | 403073103 | ,000             | ,000 |
|                           | 403073202 | ,000             | ,000 |
|                           | 403073203 | ,000             | ,000 |
|                           | 403073204 | ,000             | ,000 |
|                           | 403073303 | ,000             | ,000 |
|                           | 403073651 | ,000             | ,000 |
|                           | 403073771 | ,000             | ,000 |
|                           | 403133102 | ,000             | ,000 |
|                           | 403133106 | ,000             | ,000 |
|                           | 403133107 | ,000             | ,000 |
|                           | 403133109 | ,000             | ,000 |
|                           | 403133202 | ,000             | ,000 |
|                           | 403133203 | ,000             | ,000 |
|                           | 403133204 | ,000             | ,000 |
|                           | 403133315 | ,000             | ,000 |
|                           | 403133322 | ,000             | ,000 |
|                           | 403133401 | ,000             | ,000 |
|                           | 403133402 | ,000             | ,000 |
|                           | 403133550 | ,000             | ,000 |
|                           | 403133772 | ,000             | ,000 |
|                           | 403135803 | ,000             | ,000 |



**Categorical Variables Codings**

|                           |           | Parameter coding |      |
|---------------------------|-----------|------------------|------|
|                           |           | (26)             | (27) |
| VASTY2 (SAIR*10000)+VASTY | 403073101 | ,000             | ,000 |
|                           | 403073102 | ,000             | ,000 |
|                           | 403073103 | ,000             | ,000 |
|                           | 403073202 | ,000             | ,000 |
|                           | 403073203 | ,000             | ,000 |
|                           | 403073204 | ,000             | ,000 |
|                           | 403073303 | ,000             | ,000 |
|                           | 403073651 | ,000             | ,000 |
|                           | 403073771 | ,000             | ,000 |
|                           | 403133102 | ,000             | ,000 |
|                           | 403133106 | ,000             | ,000 |
|                           | 403133107 | ,000             | ,000 |
|                           | 403133109 | ,000             | ,000 |
|                           | 403133202 | ,000             | ,000 |
|                           | 403133203 | ,000             | ,000 |
|                           | 403133204 | ,000             | ,000 |
|                           | 403133315 | ,000             | ,000 |
|                           | 403133322 | ,000             | ,000 |
|                           | 403133401 | ,000             | ,000 |
|                           | 403133402 | ,000             | ,000 |
|                           | 403133550 | ,000             | ,000 |
|                           | 403133772 | ,000             | ,000 |
|                           | 403135803 | ,000             | ,000 |

Peer Review Only

## Categorical Variables Codings

|                           |           | Parameter coding |      |
|---------------------------|-----------|------------------|------|
|                           |           | (28)             | (29) |
| VASTY2 (SAIR*10000)+VASTY | 403073101 | ,000             | ,000 |
|                           | 403073102 | ,000             | ,000 |
|                           | 403073103 | ,000             | ,000 |
|                           | 403073202 | ,000             | ,000 |
|                           | 403073203 | ,000             | ,000 |
|                           | 403073204 | ,000             | ,000 |
|                           | 403073303 | ,000             | ,000 |
|                           | 403073651 | ,000             | ,000 |
|                           | 403073771 | ,000             | ,000 |
|                           | 403133102 | ,000             | ,000 |
|                           | 403133106 | ,000             | ,000 |
|                           | 403133107 | ,000             | ,000 |
|                           | 403133109 | ,000             | ,000 |
|                           | 403133202 | ,000             | ,000 |
|                           | 403133203 | ,000             | ,000 |
|                           | 403133204 | ,000             | ,000 |
|                           | 403133315 | ,000             | ,000 |
|                           | 403133322 | ,000             | ,000 |
|                           | 403133401 | ,000             | ,000 |
|                           | 403133402 | ,000             | ,000 |
|                           | 403133550 | ,000             | ,000 |
|                           | 403133772 | ,000             | ,000 |
|                           | 403135803 | ,000             | ,000 |

## Categorical Variables Codings

|                           |           | Parameter coding |      |
|---------------------------|-----------|------------------|------|
|                           |           | (30)             | (31) |
| VASTY2 (SAIR*10000)+VASTY | 403073101 | ,000             | ,000 |
|                           | 403073102 | ,000             | ,000 |
|                           | 403073103 | ,000             | ,000 |
|                           | 403073202 | ,000             | ,000 |
|                           | 403073203 | ,000             | ,000 |
|                           | 403073204 | ,000             | ,000 |
|                           | 403073303 | ,000             | ,000 |
|                           | 403073651 | ,000             | ,000 |
|                           | 403073771 | ,000             | ,000 |
|                           | 403133102 | ,000             | ,000 |
|                           | 403133106 | ,000             | ,000 |
|                           | 403133107 | ,000             | ,000 |
|                           | 403133109 | ,000             | ,000 |
|                           | 403133202 | ,000             | ,000 |
|                           | 403133203 | ,000             | ,000 |
|                           | 403133204 | ,000             | ,000 |
|                           | 403133315 | ,000             | ,000 |
|                           | 403133322 | ,000             | ,000 |
|                           | 403133401 | ,000             | ,000 |
|                           | 403133402 | ,000             | ,000 |
|                           | 403133550 | ,000             | ,000 |
|                           | 403133772 | ,000             | ,000 |
|                           | 403135803 | ,000             | ,000 |

## Categorical Variables Codings

|                           |           | Parameter coding |      |
|---------------------------|-----------|------------------|------|
|                           |           | (32)             | (33) |
| VASTY2 (SAIR*10000)+VASTY | 403073101 | ,000             | ,000 |
|                           | 403073102 | ,000             | ,000 |
|                           | 403073103 | ,000             | ,000 |
|                           | 403073202 | ,000             | ,000 |
|                           | 403073203 | ,000             | ,000 |
|                           | 403073204 | ,000             | ,000 |
|                           | 403073303 | ,000             | ,000 |
|                           | 403073651 | ,000             | ,000 |
|                           | 403073771 | ,000             | ,000 |
|                           | 403133102 | ,000             | ,000 |
|                           | 403133106 | ,000             | ,000 |
|                           | 403133107 | ,000             | ,000 |
|                           | 403133109 | ,000             | ,000 |
|                           | 403133202 | ,000             | ,000 |
|                           | 403133203 | ,000             | ,000 |
|                           | 403133204 | ,000             | ,000 |
|                           | 403133315 | ,000             | ,000 |
|                           | 403133322 | ,000             | ,000 |
|                           | 403133401 | ,000             | ,000 |
|                           | 403133402 | ,000             | ,000 |
|                           | 403133550 | ,000             | ,000 |
|                           | 403133772 | ,000             | ,000 |
|                           | 403135803 | ,000             | ,000 |

1  
2  
3  
4  
5  
6  
7  
8  
9  
10  
11  
12  
13  
14  
15  
16  
17  
18  
19  
20  
21  
22  
23  
24  
25  
26  
27  
28  
29  
30  
31  
32  
33  
34  
35  
36  
37  
38  
39  
40  
41  
42  
43  
44  
45  
46  
47  
48  
49  
50  
51  
52  
53  
54  
55  
56  
57  
58  
59  
60

**Categorical Variables Codings**

|                           |           | Parameter coding |      |
|---------------------------|-----------|------------------|------|
|                           |           | (34)             | (35) |
| VASTY2 (SAIR*10000)+VASTY | 403073101 | ,000             | ,000 |
|                           | 403073102 | ,000             | ,000 |
|                           | 403073103 | ,000             | ,000 |
|                           | 403073202 | ,000             | ,000 |
|                           | 403073203 | ,000             | ,000 |
|                           | 403073204 | ,000             | ,000 |
|                           | 403073303 | ,000             | ,000 |
|                           | 403073651 | ,000             | ,000 |
|                           | 403073771 | ,000             | ,000 |
|                           | 403133102 | ,000             | ,000 |
|                           | 403133106 | ,000             | ,000 |
|                           | 403133107 | ,000             | ,000 |
|                           | 403133109 | ,000             | ,000 |
|                           | 403133202 | ,000             | ,000 |
|                           | 403133203 | ,000             | ,000 |
|                           | 403133204 | ,000             | ,000 |
|                           | 403133315 | ,000             | ,000 |
|                           | 403133322 | ,000             | ,000 |
|                           | 403133401 | ,000             | ,000 |
|                           | 403133402 | ,000             | ,000 |
|                           | 403133550 | ,000             | ,000 |
|                           | 403133772 | ,000             | ,000 |
|                           | 403135803 | ,000             | ,000 |

Peer review only

## Categorical Variables Codings

|                              |                                         | Frequency | Parameter<br>(1) |
|------------------------------|-----------------------------------------|-----------|------------------|
|                              | 404060001                               | 365       | ,000             |
|                              | 404060002                               | 366       | ,000             |
|                              | 404310003                               | 291       | ,000             |
|                              | 404310004                               | 291       | ,000             |
|                              | 502300005                               | 366       | ,000             |
|                              | 502300006                               | 225       | ,000             |
|                              | 502300007                               | 366       | ,000             |
|                              | 502300214                               | 366       | ,000             |
|                              | 502300411                               | 366       | ,000             |
|                              | 502300415                               | 360       | ,000             |
|                              | 502300416                               | 363       | ,000             |
|                              | 502300811                               | 364       | ,000             |
|                              | 502300913                               | 315       | ,000             |
| weekday veckodag             | 1 måndag                                | 1805      | ,000             |
|                              | 2 tisdag                                | 1812      | 1,000            |
|                              | 3 onsdag                                | 1800      | ,000             |
|                              | 4 torsdag                               | 1794      | ,000             |
|                              | 5 fredag                                | 1788      | ,000             |
|                              | 6 lördag                                | 1735      | ,000             |
|                              | 7 söndag                                | 1741      | ,000             |
| sv7 sjättedelar för standard | 1 fjärde sjundedelen                    | 1423      | ,000             |
|                              | 2 första sjundedelen                    | 3031      | 1,000            |
|                              | 3 andra sjundedelen                     | 1238      | ,000             |
|                              | 4 tredje sjundedelen                    | 1255      | ,000             |
|                              | 5 femte sjundedelen                     | 1445      | ,000             |
|                              | 6 sjätte sjundedelen                    | 1948      | ,000             |
|                              | 7 sjunde sjundedelen                    | 2135      | ,000             |
| season säsong/period         | 1 januari-mars                          | 3182      | ,000             |
|                              | 2 april-maj                             | 2127      | 1,000            |
|                              | 3 juni-augusti                          | 2911      | ,000             |
|                              | 4 september-oktober                     | 2144      | ,000             |
|                              | 5 november-december                     | 2111      | ,000             |
| holiday större helg          | 1 ingen större helg                     | 12078     | ,000             |
|                              | 2 större helg (påsk/midsommar/julonyår) | 397       | 1,000            |

## Categorical Variables Codings

|                              |                                         | Parameter coding |       |
|------------------------------|-----------------------------------------|------------------|-------|
|                              |                                         | (2)              | (3)   |
|                              | 404060001                               | ,000             | ,000  |
|                              | 404060002                               | ,000             | ,000  |
|                              | 404310003                               | ,000             | ,000  |
|                              | 404310004                               | ,000             | ,000  |
|                              | 502300005                               | ,000             | ,000  |
|                              | 502300006                               | ,000             | ,000  |
|                              | 502300007                               | ,000             | ,000  |
|                              | 502300214                               | ,000             | ,000  |
|                              | 502300411                               | ,000             | ,000  |
|                              | 502300415                               | ,000             | ,000  |
|                              | 502300416                               | ,000             | ,000  |
|                              | 502300811                               | ,000             | ,000  |
|                              | 502300913                               | ,000             | ,000  |
| weekday veckodag             | 1 måndag                                | ,000             | ,000  |
|                              | 2 tisdag                                | ,000             | ,000  |
|                              | 3 onsdag                                | 1,000            | ,000  |
|                              | 4 torsdag                               | ,000             | 1,000 |
|                              | 5 fredag                                | ,000             | ,000  |
|                              | 6 lördag                                | ,000             | ,000  |
|                              | 7 söndag                                | ,000             | ,000  |
| sv7 sjättedelar för standard | 1 fjärde sjundedelen                    | ,000             | ,000  |
|                              | 2 första sjundedelen                    | ,000             | ,000  |
|                              | 3 andra sjundedelen                     | 1,000            | ,000  |
|                              | 4 tredje sjundedelen                    | ,000             | 1,000 |
|                              | 5 femte sjundedelen                     | ,000             | ,000  |
|                              | 6 sjätte sjundedelen                    | ,000             | ,000  |
|                              | 7 sjunde sjundedelen                    | ,000             | ,000  |
| season säsong/period         | 1 januari-mars                          | ,000             | ,000  |
|                              | 2 april-maj                             | ,000             | ,000  |
|                              | 3 juni-augusti                          | 1,000            | ,000  |
|                              | 4 september-oktober                     | ,000             | 1,000 |
|                              | 5 november-december                     | ,000             | ,000  |
| holiday större helg          | 1 ingen större helg                     |                  |       |
|                              | 2 större helg (påsk/midsommar/julonyår) |                  |       |

## Categorical Variables Codings

|                              |                                         | Parameter coding |       |
|------------------------------|-----------------------------------------|------------------|-------|
|                              |                                         | (4)              | (5)   |
|                              | 404060001                               | ,000             | ,000  |
|                              | 404060002                               | ,000             | ,000  |
|                              | 404310003                               | ,000             | ,000  |
|                              | 404310004                               | ,000             | ,000  |
|                              | 502300005                               | ,000             | ,000  |
|                              | 502300006                               | ,000             | ,000  |
|                              | 502300007                               | ,000             | ,000  |
|                              | 502300214                               | ,000             | ,000  |
|                              | 502300411                               | ,000             | ,000  |
|                              | 502300415                               | ,000             | ,000  |
|                              | 502300416                               | ,000             | ,000  |
|                              | 502300811                               | ,000             | ,000  |
|                              | 502300913                               | ,000             | ,000  |
| weekday veckodag             | 1 måndag                                | ,000             | ,000  |
|                              | 2 tisdag                                | ,000             | ,000  |
|                              | 3 onsdag                                | ,000             | ,000  |
|                              | 4 torsdag                               | ,000             | ,000  |
|                              | 5 fredag                                | 1,000            | ,000  |
|                              | 6 lördag                                | ,000             | 1,000 |
|                              | 7 söndag                                | ,000             | ,000  |
| sv7 sjättedelar för standard | 1 fjärde sjundedelen                    | ,000             | ,000  |
|                              | 2 första sjundedelen                    | ,000             | ,000  |
|                              | 3 andra sjundedelen                     | ,000             | ,000  |
|                              | 4 tredje sjundedelen                    | ,000             | ,000  |
|                              | 5 femte sjundedelen                     | 1,000            | ,000  |
|                              | 6 sjätte sjundedelen                    | ,000             | 1,000 |
|                              | 7 sjunde sjundedelen                    | ,000             | ,000  |
| season säsong/period         | 1 januari-mars                          | ,000             |       |
|                              | 2 april-maj                             | ,000             |       |
|                              | 3 juni-augusti                          | ,000             |       |
|                              | 4 september-oktober                     | ,000             |       |
|                              | 5 november-december                     | 1,000            |       |
| holiday större helg          | 1 ingen större helg                     |                  |       |
|                              | 2 större helg (påsk/midsommar/julonyår) |                  |       |



## Categorical Variables Codings

|                              |                                         | Parameter coding |      |
|------------------------------|-----------------------------------------|------------------|------|
|                              |                                         | (6)              | (7)  |
|                              | 404060001                               | ,000             | ,000 |
|                              | 404060002                               | ,000             | ,000 |
|                              | 404310003                               | ,000             | ,000 |
|                              | 404310004                               | ,000             | ,000 |
|                              | 502300005                               | ,000             | ,000 |
|                              | 502300006                               | ,000             | ,000 |
|                              | 502300007                               | ,000             | ,000 |
|                              | 502300214                               | ,000             | ,000 |
|                              | 502300411                               | ,000             | ,000 |
|                              | 502300415                               | ,000             | ,000 |
|                              | 502300416                               | ,000             | ,000 |
|                              | 502300811                               | ,000             | ,000 |
|                              | 502300913                               | ,000             | ,000 |
| weekday veckodag             | 1 måndag                                | ,000             |      |
|                              | 2 tisdag                                | ,000             |      |
|                              | 3 onsdag                                | ,000             |      |
|                              | 4 torsdag                               | ,000             |      |
|                              | 5 fredag                                | ,000             |      |
|                              | 6 lördag                                | ,000             |      |
|                              | 7 söndag                                | 1,000            |      |
| sv7 sjättedelar för standard | 1 fjärde sjundedelen                    | ,000             |      |
|                              | 2 första sjundedelen                    | ,000             |      |
|                              | 3 andra sjundedelen                     | ,000             |      |
|                              | 4 tredje sjundedelen                    | ,000             |      |
|                              | 5 femte sjundedelen                     | ,000             |      |
|                              | 6 sjätte sjundedelen                    | ,000             |      |
|                              | 7 sjunde sjundedelen                    | 1,000            |      |
| season säsong/period         | 1 januari-mars                          |                  |      |
|                              | 2 april-maj                             |                  |      |
|                              | 3 juni-augusti                          |                  |      |
|                              | 4 september-oktober                     |                  |      |
|                              | 5 november-december                     |                  |      |
| holiday större helg          | 1 ingen större helg                     |                  |      |
|                              | 2 större helg (påsk/midsommar/julonyår) |                  |      |

## Categorical Variables Codings

|                              |                                         | Parameter coding |      |
|------------------------------|-----------------------------------------|------------------|------|
|                              |                                         | (8)              | (9)  |
|                              | 404060001                               | ,000             | ,000 |
|                              | 404060002                               | ,000             | ,000 |
|                              | 404310003                               | ,000             | ,000 |
|                              | 404310004                               | ,000             | ,000 |
|                              | 502300005                               | ,000             | ,000 |
|                              | 502300006                               | ,000             | ,000 |
|                              | 502300007                               | ,000             | ,000 |
|                              | 502300214                               | ,000             | ,000 |
|                              | 502300411                               | ,000             | ,000 |
|                              | 502300415                               | ,000             | ,000 |
|                              | 502300416                               | ,000             | ,000 |
|                              | 502300811                               | ,000             | ,000 |
|                              | 502300913                               | ,000             | ,000 |
| weekday veckodag             | 1 måndag                                |                  |      |
|                              | 2 tisdag                                |                  |      |
|                              | 3 onsdag                                |                  |      |
|                              | 4 torsdag                               |                  |      |
|                              | 5 fredag                                |                  |      |
|                              | 6 lördag                                |                  |      |
|                              | 7 söndag                                |                  |      |
| sv7 sjättedelar för standard | 1 fjärde sjundedelen                    |                  |      |
|                              | 2 första sjundedelen                    |                  |      |
|                              | 3 andra sjundedelen                     |                  |      |
|                              | 4 tredje sjundedelen                    |                  |      |
|                              | 5 femte sjundedelen                     |                  |      |
|                              | 6 sjätte sjundedelen                    |                  |      |
|                              | 7 sjunde sjundedelen                    |                  |      |
| season säsong/period         | 1 januari-mars                          |                  |      |
|                              | 2 april-maj                             |                  |      |
|                              | 3 juni-augusti                          |                  |      |
|                              | 4 september-oktober                     |                  |      |
|                              | 5 november-december                     |                  |      |
| holiday större helg          | 1 ingen större helg                     |                  |      |
|                              | 2 större helg (påsk/midsommar/julonyår) |                  |      |

## Categorical Variables Codings

|                              |                                         | Parameter coding |      |
|------------------------------|-----------------------------------------|------------------|------|
|                              |                                         | (10)             | (11) |
|                              | 404060001                               | ,000             | ,000 |
|                              | 404060002                               | ,000             | ,000 |
|                              | 404310003                               | ,000             | ,000 |
|                              | 404310004                               | ,000             | ,000 |
|                              | 502300005                               | ,000             | ,000 |
|                              | 502300006                               | ,000             | ,000 |
|                              | 502300007                               | ,000             | ,000 |
|                              | 502300214                               | ,000             | ,000 |
|                              | 502300411                               | ,000             | ,000 |
|                              | 502300415                               | ,000             | ,000 |
|                              | 502300416                               | ,000             | ,000 |
|                              | 502300811                               | ,000             | ,000 |
|                              | 502300913                               | ,000             | ,000 |
| weekday veckodag             | 1 måndag                                |                  |      |
|                              | 2 tisdag                                |                  |      |
|                              | 3 onsdag                                |                  |      |
|                              | 4 torsdag                               |                  |      |
|                              | 5 fredag                                |                  |      |
|                              | 6 lördag                                |                  |      |
|                              | 7 söndag                                |                  |      |
| sv7 sjättedelar för standard | 1 fjärde sjundedelen                    |                  |      |
|                              | 2 första sjundedelen                    |                  |      |
|                              | 3 andra sjundedelen                     |                  |      |
|                              | 4 tredje sjundedelen                    |                  |      |
|                              | 5 femte sjundedelen                     |                  |      |
|                              | 6 sjätte sjundedelen                    |                  |      |
|                              | 7 sjunde sjundedelen                    |                  |      |
| season säsong/period         | 1 januari-mars                          |                  |      |
|                              | 2 april-maj                             |                  |      |
|                              | 3 juni-augusti                          |                  |      |
|                              | 4 september-oktober                     |                  |      |
|                              | 5 november-december                     |                  |      |
| holiday större helg          | 1 ingen större helg                     |                  |      |
|                              | 2 större helg (påsk/midsommar/julonyår) |                  |      |

## Categorical Variables Codings

|                              |                                         | Parameter coding |      |
|------------------------------|-----------------------------------------|------------------|------|
|                              |                                         | (12)             | (13) |
|                              | 404060001                               | ,000             | ,000 |
|                              | 404060002                               | ,000             | ,000 |
|                              | 404310003                               | ,000             | ,000 |
|                              | 404310004                               | ,000             | ,000 |
|                              | 502300005                               | ,000             | ,000 |
|                              | 502300006                               | ,000             | ,000 |
|                              | 502300007                               | ,000             | ,000 |
|                              | 502300214                               | ,000             | ,000 |
|                              | 502300411                               | ,000             | ,000 |
|                              | 502300415                               | ,000             | ,000 |
|                              | 502300416                               | ,000             | ,000 |
|                              | 502300811                               | ,000             | ,000 |
|                              | 502300913                               | ,000             | ,000 |
| weekday veckodag             | 1 måndag                                |                  |      |
|                              | 2 tisdag                                |                  |      |
|                              | 3 onsdag                                |                  |      |
|                              | 4 torsdag                               |                  |      |
|                              | 5 fredag                                |                  |      |
|                              | 6 lördag                                |                  |      |
|                              | 7 söndag                                |                  |      |
| sv7 sjättedelar för standard | 1 fjärde sjundedelen                    |                  |      |
|                              | 2 första sjundedelen                    |                  |      |
|                              | 3 andra sjundedelen                     |                  |      |
|                              | 4 tredje sjundedelen                    |                  |      |
|                              | 5 femte sjundedelen                     |                  |      |
|                              | 6 sjätte sjundedelen                    |                  |      |
|                              | 7 sjunde sjundedelen                    |                  |      |
| season säsong/period         | 1 januari-mars                          |                  |      |
|                              | 2 april-maj                             |                  |      |
|                              | 3 juni-augusti                          |                  |      |
|                              | 4 september-oktober                     |                  |      |
|                              | 5 november-december                     |                  |      |
| holiday större helg          | 1 ingen större helg                     |                  |      |
|                              | 2 större helg (påsk/midsommar/julonyår) |                  |      |

## Categorical Variables Codings

|                              |                                         | Parameter coding |      |
|------------------------------|-----------------------------------------|------------------|------|
|                              |                                         | (14)             | (15) |
|                              | 404060001                               | ,000             | ,000 |
|                              | 404060002                               | ,000             | ,000 |
|                              | 404310003                               | ,000             | ,000 |
|                              | 404310004                               | ,000             | ,000 |
|                              | 502300005                               | ,000             | ,000 |
|                              | 502300006                               | ,000             | ,000 |
|                              | 502300007                               | ,000             | ,000 |
|                              | 502300214                               | ,000             | ,000 |
|                              | 502300411                               | ,000             | ,000 |
|                              | 502300415                               | ,000             | ,000 |
|                              | 502300416                               | ,000             | ,000 |
|                              | 502300811                               | ,000             | ,000 |
|                              | 502300913                               | ,000             | ,000 |
| weekday veckodag             | 1 måndag                                |                  |      |
|                              | 2 tisdag                                |                  |      |
|                              | 3 onsdag                                |                  |      |
|                              | 4 torsdag                               |                  |      |
|                              | 5 fredag                                |                  |      |
|                              | 6 lördag                                |                  |      |
|                              | 7 söndag                                |                  |      |
| sv7 sjättedelar för standard | 1 fjärde sjundedelen                    |                  |      |
|                              | 2 första sjundedelen                    |                  |      |
|                              | 3 andra sjundedelen                     |                  |      |
|                              | 4 tredje sjundedelen                    |                  |      |
|                              | 5 femte sjundedelen                     |                  |      |
|                              | 6 sjätte sjundedelen                    |                  |      |
|                              | 7 sjunde sjundedelen                    |                  |      |
| season säsong/period         | 1 januari-mars                          |                  |      |
|                              | 2 april-maj                             |                  |      |
|                              | 3 juni-augusti                          |                  |      |
|                              | 4 september-oktober                     |                  |      |
|                              | 5 november-december                     |                  |      |
| holiday större helg          | 1 ingen större helg                     |                  |      |
|                              | 2 större helg (påsk/midsommar/julonyår) |                  |      |

## Categorical Variables Codings

|                              |                                         | Parameter coding |      |
|------------------------------|-----------------------------------------|------------------|------|
|                              |                                         | (16)             | (17) |
|                              | 404060001                               | ,000             | ,000 |
|                              | 404060002                               | ,000             | ,000 |
|                              | 404310003                               | ,000             | ,000 |
|                              | 404310004                               | ,000             | ,000 |
|                              | 502300005                               | ,000             | ,000 |
|                              | 502300006                               | ,000             | ,000 |
|                              | 502300007                               | ,000             | ,000 |
|                              | 502300214                               | ,000             | ,000 |
|                              | 502300411                               | ,000             | ,000 |
|                              | 502300415                               | ,000             | ,000 |
|                              | 502300416                               | ,000             | ,000 |
|                              | 502300811                               | ,000             | ,000 |
|                              | 502300913                               | ,000             | ,000 |
| weekday veckodag             | 1 måndag                                |                  |      |
|                              | 2 tisdag                                |                  |      |
|                              | 3 onsdag                                |                  |      |
|                              | 4 torsdag                               |                  |      |
|                              | 5 fredag                                |                  |      |
|                              | 6 lördag                                |                  |      |
|                              | 7 söndag                                |                  |      |
| sv7 sjättedelar för standard | 1 fjärde sjundedelen                    |                  |      |
|                              | 2 första sjundedelen                    |                  |      |
|                              | 3 andra sjundedelen                     |                  |      |
|                              | 4 tredje sjundedelen                    |                  |      |
|                              | 5 femte sjundedelen                     |                  |      |
|                              | 6 sjätte sjundedelen                    |                  |      |
|                              | 7 sjunde sjundedelen                    |                  |      |
| season säsong/period         | 1 januari-mars                          |                  |      |
|                              | 2 april-maj                             |                  |      |
|                              | 3 juni-augusti                          |                  |      |
|                              | 4 september-oktober                     |                  |      |
|                              | 5 november-december                     |                  |      |
| holiday större helg          | 1 ingen större helg                     |                  |      |
|                              | 2 större helg (påsk/midsommar/julonyår) |                  |      |

## Categorical Variables Codings

|                              |                                         | Parameter coding |      |
|------------------------------|-----------------------------------------|------------------|------|
|                              |                                         | (18)             | (19) |
|                              | 404060001                               | ,000             | ,000 |
|                              | 404060002                               | ,000             | ,000 |
|                              | 404310003                               | ,000             | ,000 |
|                              | 404310004                               | ,000             | ,000 |
|                              | 502300005                               | ,000             | ,000 |
|                              | 502300006                               | ,000             | ,000 |
|                              | 502300007                               | ,000             | ,000 |
|                              | 502300214                               | ,000             | ,000 |
|                              | 502300411                               | ,000             | ,000 |
|                              | 502300415                               | ,000             | ,000 |
|                              | 502300416                               | ,000             | ,000 |
|                              | 502300811                               | ,000             | ,000 |
|                              | 502300913                               | ,000             | ,000 |
| weekday veckodag             | 1 måndag                                |                  |      |
|                              | 2 tisdag                                |                  |      |
|                              | 3 onsdag                                |                  |      |
|                              | 4 torsdag                               |                  |      |
|                              | 5 fredag                                |                  |      |
|                              | 6 lördag                                |                  |      |
|                              | 7 söndag                                |                  |      |
| sv7 sjättedelar för standard | 1 fjärde sjundedelen                    |                  |      |
|                              | 2 första sjundedelen                    |                  |      |
|                              | 3 andra sjundedelen                     |                  |      |
|                              | 4 tredje sjundedelen                    |                  |      |
|                              | 5 femte sjundedelen                     |                  |      |
|                              | 6 sjätte sjundedelen                    |                  |      |
|                              | 7 sjunde sjundedelen                    |                  |      |
| season säsong/period         | 1 januari-mars                          |                  |      |
|                              | 2 april-maj                             |                  |      |
|                              | 3 juni-augusti                          |                  |      |
|                              | 4 september-oktober                     |                  |      |
|                              | 5 november-december                     |                  |      |
| holiday större helg          | 1 ingen större helg                     |                  |      |
|                              | 2 större helg (påsk/midsommar/julonyår) |                  |      |

## Categorical Variables Codings

|                              |                                         | Parameter coding |      |
|------------------------------|-----------------------------------------|------------------|------|
|                              |                                         | (20)             | (21) |
|                              | 404060001                               | ,000             | ,000 |
|                              | 404060002                               | ,000             | ,000 |
|                              | 404310003                               | ,000             | ,000 |
|                              | 404310004                               | ,000             | ,000 |
|                              | 502300005                               | ,000             | ,000 |
|                              | 502300006                               | ,000             | ,000 |
|                              | 502300007                               | ,000             | ,000 |
|                              | 502300214                               | ,000             | ,000 |
|                              | 502300411                               | ,000             | ,000 |
|                              | 502300415                               | ,000             | ,000 |
|                              | 502300416                               | ,000             | ,000 |
|                              | 502300811                               | ,000             | ,000 |
|                              | 502300913                               | ,000             | ,000 |
| weekday veckodag             | 1 måndag                                |                  |      |
|                              | 2 tisdag                                |                  |      |
|                              | 3 onsdag                                |                  |      |
|                              | 4 torsdag                               |                  |      |
|                              | 5 fredag                                |                  |      |
|                              | 6 lördag                                |                  |      |
|                              | 7 söndag                                |                  |      |
| sv7 sjättedelar för standard | 1 fjärde sjundedelen                    |                  |      |
|                              | 2 första sjundedelen                    |                  |      |
|                              | 3 andra sjundedelen                     |                  |      |
|                              | 4 tredje sjundedelen                    |                  |      |
|                              | 5 femte sjundedelen                     |                  |      |
|                              | 6 sjätte sjundedelen                    |                  |      |
|                              | 7 sjunde sjundedelen                    |                  |      |
| season säsong/period         | 1 januari-mars                          |                  |      |
|                              | 2 april-maj                             |                  |      |
|                              | 3 juni-augusti                          |                  |      |
|                              | 4 september-oktober                     |                  |      |
|                              | 5 november-december                     |                  |      |
| holiday större helg          | 1 ingen större helg                     |                  |      |
|                              | 2 större helg (påsk/midsommar/julonyår) |                  |      |



## Categorical Variables Codings

|                              |                                         | Parameter coding |       |
|------------------------------|-----------------------------------------|------------------|-------|
|                              |                                         | (22)             | (23)  |
|                              | 404060001                               | ,000             | 1,000 |
|                              | 404060002                               | ,000             | ,000  |
|                              | 404310003                               | ,000             | ,000  |
|                              | 404310004                               | ,000             | ,000  |
|                              | 502300005                               | ,000             | ,000  |
|                              | 502300006                               | ,000             | ,000  |
|                              | 502300007                               | ,000             | ,000  |
|                              | 502300214                               | ,000             | ,000  |
|                              | 502300411                               | ,000             | ,000  |
|                              | 502300415                               | ,000             | ,000  |
|                              | 502300416                               | ,000             | ,000  |
|                              | 502300811                               | ,000             | ,000  |
|                              | 502300913                               | ,000             | ,000  |
| weekday veckodag             | 1 måndag                                |                  |       |
|                              | 2 tisdag                                |                  |       |
|                              | 3 onsdag                                |                  |       |
|                              | 4 torsdag                               |                  |       |
|                              | 5 fredag                                |                  |       |
|                              | 6 lördag                                |                  |       |
|                              | 7 söndag                                |                  |       |
| sv7 sjättedelar för standard | 1 fjärde sjundedelen                    |                  |       |
|                              | 2 första sjundedelen                    |                  |       |
|                              | 3 andra sjundedelen                     |                  |       |
|                              | 4 tredje sjundedelen                    |                  |       |
|                              | 5 femte sjundedelen                     |                  |       |
|                              | 6 sjätte sjundedelen                    |                  |       |
|                              | 7 sjunde sjundedelen                    |                  |       |
| season säsong/period         | 1 januari-mars                          |                  |       |
|                              | 2 april-maj                             |                  |       |
|                              | 3 juni-augusti                          |                  |       |
|                              | 4 september-oktober                     |                  |       |
|                              | 5 november-december                     |                  |       |
| holiday större helg          | 1 ingen större helg                     |                  |       |
|                              | 2 större helg (påsk/midsommar/julonyår) |                  |       |

## Categorical Variables Codings

|                              |                                         | Parameter coding |       |
|------------------------------|-----------------------------------------|------------------|-------|
|                              |                                         | (24)             | (25)  |
|                              | 404060001                               | ,000             | ,000  |
|                              | 404060002                               | 1,000            | ,000  |
|                              | 404310003                               | ,000             | 1,000 |
|                              | 404310004                               | ,000             | ,000  |
|                              | 502300005                               | ,000             | ,000  |
|                              | 502300006                               | ,000             | ,000  |
|                              | 502300007                               | ,000             | ,000  |
|                              | 502300214                               | ,000             | ,000  |
|                              | 502300411                               | ,000             | ,000  |
|                              | 502300415                               | ,000             | ,000  |
|                              | 502300416                               | ,000             | ,000  |
|                              | 502300811                               | ,000             | ,000  |
|                              | 502300913                               | ,000             | ,000  |
| weekday veckodag             | 1 måndag                                |                  |       |
|                              | 2 tisdag                                |                  |       |
|                              | 3 onsdag                                |                  |       |
|                              | 4 torsdag                               |                  |       |
|                              | 5 fredag                                |                  |       |
|                              | 6 lördag                                |                  |       |
|                              | 7 söndag                                |                  |       |
| sv7 sjättedelar för standard | 1 fjärde sjundedelen                    |                  |       |
|                              | 2 första sjundedelen                    |                  |       |
|                              | 3 andra sjundedelen                     |                  |       |
|                              | 4 tredje sjundedelen                    |                  |       |
|                              | 5 femte sjundedelen                     |                  |       |
|                              | 6 sjätte sjundedelen                    |                  |       |
|                              | 7 sjunde sjundedelen                    |                  |       |
| season säsong/period         | 1 januari-mars                          |                  |       |
|                              | 2 april-maj                             |                  |       |
|                              | 3 juni-augusti                          |                  |       |
|                              | 4 september-oktober                     |                  |       |
|                              | 5 november-december                     |                  |       |
| holiday större helg          | 1 ingen större helg                     |                  |       |
|                              | 2 större helg (påsk/midsommar/julonyår) |                  |       |

## Categorical Variables Codings

|                              |                                         | Parameter coding |       |
|------------------------------|-----------------------------------------|------------------|-------|
|                              |                                         | (26)             | (27)  |
|                              | 404060001                               | ,000             | ,000  |
|                              | 404060002                               | ,000             | ,000  |
|                              | 404310003                               | ,000             | ,000  |
|                              | 404310004                               | 1,000            | ,000  |
|                              | 502300005                               | ,000             | 1,000 |
|                              | 502300006                               | ,000             | ,000  |
|                              | 502300007                               | ,000             | ,000  |
|                              | 502300214                               | ,000             | ,000  |
|                              | 502300411                               | ,000             | ,000  |
|                              | 502300415                               | ,000             | ,000  |
|                              | 502300416                               | ,000             | ,000  |
|                              | 502300811                               | ,000             | ,000  |
|                              | 502300913                               | ,000             | ,000  |
| weekday veckodag             | 1 måndag                                |                  |       |
|                              | 2 tisdag                                |                  |       |
|                              | 3 onsdag                                |                  |       |
|                              | 4 torsdag                               |                  |       |
|                              | 5 fredag                                |                  |       |
|                              | 6 lördag                                |                  |       |
|                              | 7 söndag                                |                  |       |
| sv7 sjättedelar för standard | 1 fjärde sjundedelen                    |                  |       |
|                              | 2 första sjundedelen                    |                  |       |
|                              | 3 andra sjundedelen                     |                  |       |
|                              | 4 tredje sjundedelen                    |                  |       |
|                              | 5 femte sjundedelen                     |                  |       |
|                              | 6 sjätte sjundedelen                    |                  |       |
|                              | 7 sjunde sjundedelen                    |                  |       |
| season säsong/period         | 1 januari-mars                          |                  |       |
|                              | 2 april-maj                             |                  |       |
|                              | 3 juni-augusti                          |                  |       |
|                              | 4 september-oktober                     |                  |       |
|                              | 5 november-december                     |                  |       |
| holiday större helg          | 1 ingen större helg                     |                  |       |
|                              | 2 större helg (påsk/midsommar/julonyår) |                  |       |

## Categorical Variables Codings

|                              |                                         | Parameter coding |       |
|------------------------------|-----------------------------------------|------------------|-------|
|                              |                                         | (28)             | (29)  |
|                              | 404060001                               | ,000             | ,000  |
|                              | 404060002                               | ,000             | ,000  |
|                              | 404310003                               | ,000             | ,000  |
|                              | 404310004                               | ,000             | ,000  |
|                              | 502300005                               | ,000             | ,000  |
|                              | 502300006                               | 1,000            | ,000  |
|                              | 502300007                               | ,000             | 1,000 |
|                              | 502300214                               | ,000             | ,000  |
|                              | 502300411                               | ,000             | ,000  |
|                              | 502300415                               | ,000             | ,000  |
|                              | 502300416                               | ,000             | ,000  |
|                              | 502300811                               | ,000             | ,000  |
|                              | 502300913                               | ,000             | ,000  |
| weekday veckodag             | 1 måndag                                |                  |       |
|                              | 2 tisdag                                |                  |       |
|                              | 3 onsdag                                |                  |       |
|                              | 4 torsdag                               |                  |       |
|                              | 5 fredag                                |                  |       |
|                              | 6 lördag                                |                  |       |
|                              | 7 söndag                                |                  |       |
| sv7 sjättedelar för standard | 1 fjärde sjundedelen                    |                  |       |
|                              | 2 första sjundedelen                    |                  |       |
|                              | 3 andra sjundedelen                     |                  |       |
|                              | 4 tredje sjundedelen                    |                  |       |
|                              | 5 femte sjundedelen                     |                  |       |
|                              | 6 sjätte sjundedelen                    |                  |       |
|                              | 7 sjunde sjundedelen                    |                  |       |
| season säsong/period         | 1 januari-mars                          |                  |       |
|                              | 2 april-maj                             |                  |       |
|                              | 3 juni-augusti                          |                  |       |
|                              | 4 september-oktober                     |                  |       |
|                              | 5 november-december                     |                  |       |
| holiday större helg          | 1 ingen större helg                     |                  |       |
|                              | 2 större helg (påsk/midsommar/julonyår) |                  |       |

## Categorical Variables Codings

|                              |                                         | Parameter coding |       |
|------------------------------|-----------------------------------------|------------------|-------|
|                              |                                         | (30)             | (31)  |
|                              | 404060001                               | ,000             | ,000  |
|                              | 404060002                               | ,000             | ,000  |
|                              | 404310003                               | ,000             | ,000  |
|                              | 404310004                               | ,000             | ,000  |
|                              | 502300005                               | ,000             | ,000  |
|                              | 502300006                               | ,000             | ,000  |
|                              | 502300007                               | ,000             | ,000  |
|                              | 502300214                               | 1,000            | ,000  |
|                              | 502300411                               | ,000             | 1,000 |
|                              | 502300415                               | ,000             | ,000  |
|                              | 502300416                               | ,000             | ,000  |
|                              | 502300811                               | ,000             | ,000  |
|                              | 502300913                               | ,000             | ,000  |
| weekday veckodag             | 1 måndag                                |                  |       |
|                              | 2 tisdag                                |                  |       |
|                              | 3 onsdag                                |                  |       |
|                              | 4 torsdag                               |                  |       |
|                              | 5 fredag                                |                  |       |
|                              | 6 lördag                                |                  |       |
|                              | 7 söndag                                |                  |       |
| sv7 sjättedelar för standard | 1 fjärde sjundedelen                    |                  |       |
|                              | 2 första sjundedelen                    |                  |       |
|                              | 3 andra sjundedelen                     |                  |       |
|                              | 4 tredje sjundedelen                    |                  |       |
|                              | 5 femte sjundedelen                     |                  |       |
|                              | 6 sjätte sjundedelen                    |                  |       |
|                              | 7 sjunde sjundedelen                    |                  |       |
| season säsong/period         | 1 januari-mars                          |                  |       |
|                              | 2 april-maj                             |                  |       |
|                              | 3 juni-augusti                          |                  |       |
|                              | 4 september-oktober                     |                  |       |
|                              | 5 november-december                     |                  |       |
| holiday större helg          | 1 ingen större helg                     |                  |       |
|                              | 2 större helg (påsk/midsommar/julonyår) |                  |       |

## Categorical Variables Codings

|                              |                                         | Parameter coding |       |
|------------------------------|-----------------------------------------|------------------|-------|
|                              |                                         | (32)             | (33)  |
|                              | 404060001                               | ,000             | ,000  |
|                              | 404060002                               | ,000             | ,000  |
|                              | 404310003                               | ,000             | ,000  |
|                              | 404310004                               | ,000             | ,000  |
|                              | 502300005                               | ,000             | ,000  |
|                              | 502300006                               | ,000             | ,000  |
|                              | 502300007                               | ,000             | ,000  |
|                              | 502300214                               | ,000             | ,000  |
|                              | 502300411                               | ,000             | ,000  |
|                              | 502300415                               | 1,000            | ,000  |
|                              | 502300416                               | ,000             | 1,000 |
|                              | 502300811                               | ,000             | ,000  |
|                              | 502300913                               | ,000             | ,000  |
| weekday veckodag             | 1 måndag                                |                  |       |
|                              | 2 tisdag                                |                  |       |
|                              | 3 onsdag                                |                  |       |
|                              | 4 torsdag                               |                  |       |
|                              | 5 fredag                                |                  |       |
|                              | 6 lördag                                |                  |       |
|                              | 7 söndag                                |                  |       |
| sv7 sjättedelar för standard | 1 fjärde sjundedelen                    |                  |       |
|                              | 2 första sjundedelen                    |                  |       |
|                              | 3 andra sjundedelen                     |                  |       |
|                              | 4 tredje sjundedelen                    |                  |       |
|                              | 5 femte sjundedelen                     |                  |       |
|                              | 6 sjätte sjundedelen                    |                  |       |
|                              | 7 sjunde sjundedelen                    |                  |       |
| season säsong/period         | 1 januari-mars                          |                  |       |
|                              | 2 april-maj                             |                  |       |
|                              | 3 juni-augusti                          |                  |       |
|                              | 4 september-oktober                     |                  |       |
|                              | 5 november-december                     |                  |       |
| holiday större helg          | 1 ingen större helg                     |                  |       |
|                              | 2 större helg (påsk/midsommar/julonyår) |                  |       |

## Categorical Variables Codings

|                              |                                         | Parameter coding |       |
|------------------------------|-----------------------------------------|------------------|-------|
|                              |                                         | (34)             | (35)  |
|                              | 404060001                               | ,000             | ,000  |
|                              | 404060002                               | ,000             | ,000  |
|                              | 404310003                               | ,000             | ,000  |
|                              | 404310004                               | ,000             | ,000  |
|                              | 502300005                               | ,000             | ,000  |
|                              | 502300006                               | ,000             | ,000  |
|                              | 502300007                               | ,000             | ,000  |
|                              | 502300214                               | ,000             | ,000  |
|                              | 502300411                               | ,000             | ,000  |
|                              | 502300415                               | ,000             | ,000  |
|                              | 502300416                               | ,000             | ,000  |
|                              | 502300811                               | 1,000            | ,000  |
|                              | 502300913                               | ,000             | 1,000 |
| weekday veckodag             | 1 måndag                                |                  |       |
|                              | 2 tisdag                                |                  |       |
|                              | 3 onsdag                                |                  |       |
|                              | 4 torsdag                               |                  |       |
|                              | 5 fredag                                |                  |       |
|                              | 6 lördag                                |                  |       |
|                              | 7 söndag                                |                  |       |
| sv7 sjättedelar för standard | 1 fjärde sjundedelen                    |                  |       |
|                              | 2 första sjundedelen                    |                  |       |
|                              | 3 andra sjundedelen                     |                  |       |
|                              | 4 tredje sjundedelen                    |                  |       |
|                              | 5 femte sjundedelen                     |                  |       |
|                              | 6 sjätte sjundedelen                    |                  |       |
|                              | 7 sjunde sjundedelen                    |                  |       |
| season säsong/period         | 1 januari-mars                          |                  |       |
|                              | 2 april-maj                             |                  |       |
|                              | 3 juni-augusti                          |                  |       |
|                              | 4 september-oktober                     |                  |       |
|                              | 5 november-december                     |                  |       |
| holiday större helg          | 1 ingen större helg                     |                  |       |
|                              | 2 större helg (påsk/midsommar/julonyår) |                  |       |

**Block 0: Beginning Block**

Classification Table<sup>a,b</sup>

| Observed           |                                                |                                                              |
|--------------------|------------------------------------------------|--------------------------------------------------------------|
| Step 0             | luonnelt1 luonne highest = tapahtui potilaalle | 0 ingen händelse eller läheltä piti<br>1 tapahtui potilaalle |
| Overall Percentage |                                                |                                                              |

Classification Table<sup>a,b</sup>

| Observed           |                                                |                                                              | Predicted                           |
|--------------------|------------------------------------------------|--------------------------------------------------------------|-------------------------------------|
|                    |                                                |                                                              | luonnelt1 luonne highest = ...      |
|                    |                                                |                                                              | 0 ingen händelse eller läheltä piti |
| Step 0             | luonnelt1 luonne highest = tapahtui potilaalle | 0 ingen händelse eller läheltä piti<br>1 tapahtui potilaalle | 11627<br>848                        |
| Overall Percentage |                                                |                                                              |                                     |

Classification Table<sup>a,b</sup>

| Observed           |                                                |                                                              | Predicted                    |
|--------------------|------------------------------------------------|--------------------------------------------------------------|------------------------------|
|                    |                                                |                                                              | luonnelt1 luonne highest ... |
|                    |                                                |                                                              | 1 tapahtui potilaalle        |
| Step 0             | luonnelt1 luonne highest = tapahtui potilaalle | 0 ingen händelse eller läheltä piti<br>1 tapahtui potilaalle | 0<br>0                       |
| Overall Percentage |                                                |                                                              |                              |

Classification Table<sup>a,b</sup>

| Observed           |                                                |                                                              | Predicted          |
|--------------------|------------------------------------------------|--------------------------------------------------------------|--------------------|
|                    |                                                |                                                              | Percentage Correct |
| Step 0             | luonnelt1 luonne highest = tapahtui potilaalle | 0 ingen händelse eller läheltä piti<br>1 tapahtui potilaalle | 100,0<br>,0        |
| Overall Percentage |                                                |                                                              | 93,2               |

a. Constant is included in the model.

b. The cut value is ,500



## Variables in the Equation

|                 | B      | S.E. | Wald     | df | Sig. | Exp(B) |
|-----------------|--------|------|----------|----|------|--------|
| Step 0 Constant | -2,618 | ,036 | 5417,889 | 1  | ,000 | ,073   |

## Variables not in the Equation

|                      | Score   | df | Sig. |
|----------------------|---------|----|------|
| Step 0 Variables sv7 | 19,201  | 6  | ,004 |
| sv7(1)               | 13,339  | 1  | ,000 |
| sv7(2)               | ,536    | 1  | ,464 |
| sv7(3)               | ,394    | 1  | ,530 |
| sv7(4)               | ,282    | 1  | ,596 |
| sv7(5)               | 5,803   | 1  | ,016 |
| sv7(6)               | 2,849   | 1  | ,091 |
| VASTY2               | 299,491 | 35 | ,000 |
| VASTY2(1)            | ,007    | 1  | ,934 |
| VASTY2(2)            | 8,968   | 1  | ,003 |
| VASTY2(3)            | 15,764  | 1  | ,000 |
| VASTY2(4)            | ,453    | 1  | ,501 |
| VASTY2(5)            | ,965    | 1  | ,326 |
| VASTY2(6)            | 14,062  | 1  | ,000 |
| VASTY2(7)            | 12,067  | 1  | ,001 |
| VASTY2(8)            | 1,504   | 1  | ,220 |
| VASTY2(9)            | 1,612   | 1  | ,204 |
| VASTY2(10)           | 55,161  | 1  | ,000 |
| VASTY2(11)           | 11,675  | 1  | ,001 |
| VASTY2(12)           | ,213    | 1  | ,644 |
| VASTY2(13)           | 55,161  | 1  | ,000 |
| VASTY2(14)           | 1,504   | 1  | ,220 |
| VASTY2(15)           | 1,199   | 1  | ,273 |
| VASTY2(16)           | 3,222   | 1  | ,073 |
| VASTY2(17)           | 12,590  | 1  | ,000 |
| VASTY2(18)           | 7,137   | 1  | ,008 |
| VASTY2(19)           | 19,294  | 1  | ,000 |
| VASTY2(20)           | ,030    | 1  | ,863 |
| VASTY2(21)           | ,647    | 1  | ,421 |
| VASTY2(22)           | ,782    | 1  | ,377 |
| VASTY2(23)           | 1,199   | 1  | ,273 |
| VASTY2(24)           | 2,253   | 1  | ,133 |
| VASTY2(25)           | 1,513   | 1  | ,219 |
| VASTY2(26)           | 7,708   | 1  | ,005 |
| VASTY2(27)           | 15,836  | 1  | ,000 |
| VASTY2(28)           | 6,172   | 1  | ,013 |
| VASTY2(29)           | 11,203  | 1  | ,001 |
| VASTY2(30)           | 1,058   | 1  | ,304 |
| VASTY2(31)           | 6,527   | 1  | ,011 |

## Variables not in the Equation

|                    | Score   | df | Sig. |
|--------------------|---------|----|------|
| VASTY2(32)         | ,544    | 1  | ,461 |
| VASTY2(33)         | ,126    | 1  | ,723 |
| VASTY2(34)         | 14,062  | 1  | ,000 |
| VASTY2(35)         | 15,901  | 1  | ,000 |
| weekday            | 14,938  | 6  | ,021 |
| weekday(1)         | ,984    | 1  | ,321 |
| weekday(2)         | ,599    | 1  | ,439 |
| weekday(3)         | ,376    | 1  | ,540 |
| weekday(4)         | 1,867   | 1  | ,172 |
| weekday(5)         | 3,400   | 1  | ,065 |
| weekday(6)         | 9,074   | 1  | ,003 |
| holiday(1)         | 3,316   | 1  | ,069 |
| season             | 5,196   | 4  | ,268 |
| season(1)          | ,388    | 1  | ,533 |
| season(2)          | 1,566   | 1  | ,211 |
| season(3)          | 2,964   | 1  | ,085 |
| season(4)          | ,650    | 1  | ,420 |
| Overall Statistics | 328,342 | 52 | ,000 |

## Block 1: Method = Enter

## Omnibus Tests of Model Coefficients

|             | Chi-square | df | Sig. |
|-------------|------------|----|------|
| Step 1 Step | 336,551    | 52 | ,000 |
| Block       | 336,551    | 52 | ,000 |
| Model       | 336,551    | 52 | ,000 |

## Model Summary

| Step | -2 Log likelihood     | Cox & Snell R Square | Nagelkerke R Square |
|------|-----------------------|----------------------|---------------------|
| 1    | 5860,321 <sup>a</sup> | ,027                 | ,068                |

a. Estimation terminated at iteration number 7 because parameter estimates changed by less than ,001.

Classification Table<sup>a</sup>

| Observed           |                                                              |
|--------------------|--------------------------------------------------------------|
| Step 1             | luonnelt1 luonne highest = tapahtui potilaalle               |
|                    | 0 ingen händelse eller läheltä piti<br>1 tapahtui potilaalle |
| Overall Percentage |                                                              |

Classification Table<sup>a</sup>

| Observed           |                                                | Predicted                           |
|--------------------|------------------------------------------------|-------------------------------------|
|                    |                                                | luonnelt1 luonne highest = ...      |
|                    |                                                | 0 ingen händelse eller läheltä piti |
| Step 1             | luonnelt1 luonne highest = tapahtui potilaalle | 0 ingen händelse eller läheltä piti |
|                    |                                                | 11627                               |
|                    |                                                | 848                                 |
| Overall Percentage |                                                |                                     |

Classification Table<sup>a</sup>

| Observed           |                                                | Predicted                           |
|--------------------|------------------------------------------------|-------------------------------------|
|                    |                                                | luonnelt1 luonne highest ...        |
|                    |                                                | 1 tapahtui potilaalle               |
| Step 1             | luonnelt1 luonne highest = tapahtui potilaalle | 0 ingen händelse eller läheltä piti |
|                    |                                                | 0                                   |
|                    |                                                | 0                                   |
| Overall Percentage |                                                |                                     |

Classification Table<sup>a</sup>

| Observed           |                                                | Predicted                           |
|--------------------|------------------------------------------------|-------------------------------------|
|                    |                                                | Percentage Correct                  |
| Step 1             | luonnelt1 luonne highest = tapahtui potilaalle | 0 ingen händelse eller läheltä piti |
|                    |                                                | 100,0                               |
|                    |                                                | ,0                                  |
| Overall Percentage |                                                | 93,2                                |

a. The cut value is ,500

## Variables in the Equation

|                         | B      | S.E. | Wald    | df | Sig. | Exp(B) |
|-------------------------|--------|------|---------|----|------|--------|
| Step 1 <sup>a</sup> sv7 |        |      | 5,111   | 6  | ,530 |        |
| sv7(1)                  | -,176  | ,153 | 1,330   | 1  | ,249 | ,838   |
| sv7(2)                  | -,069  | ,158 | ,189    | 1  | ,663 | ,933   |
| sv7(3)                  | -,100  | ,156 | ,408    | 1  | ,523 | ,905   |
| sv7(4)                  | -,068  | ,147 | ,215    | 1  | ,643 | ,934   |
| sv7(5)                  | -,032  | ,139 | ,052    | 1  | ,819 | ,969   |
| sv7(6)                  | ,172   | ,155 | 1,227   | 1  | ,268 | 1,187  |
| VASTY2                  |        |      | 233,612 | 35 | ,000 |        |
| VASTY2(1)               | ,073   | ,301 | ,059    | 1  | ,808 | 1,076  |
| VASTY2(2)               | ,473   | ,281 | 2,830   | 1  | ,093 | 1,605  |
| VASTY2(3)               | -1,392 | ,465 | 8,962   | 1  | ,003 | ,249   |
| VASTY2(4)               | ,216   | ,293 | ,547    | 1  | ,459 | 1,242  |
| VASTY2(5)               | -,128  | ,327 | ,154    | 1  | ,695 | ,880   |
| VASTY2(6)               | -1,417 | ,449 | 9,952   | 1  | ,002 | ,242   |
| VASTY2(7)               | ,652   | ,272 | 5,733   | 1  | ,017 | 1,920  |
| VASTY2(8)               | -,189  | ,321 | ,345    | 1  | ,557 | ,828   |
| VASTY2(9)               | ,318   | ,290 | 1,196   | 1  | ,274 | 1,374  |
| VASTY2(10)              | ,952   | ,268 | 12,619  | 1  | ,000 | 2,590  |
| VASTY2(11)              | ,635   | ,273 | 5,425   | 1  | ,020 | 1,887  |
| VASTY2(12)              | ,097   | ,298 | ,106    | 1  | ,745 | 1,102  |
| VASTY2(13)              | ,938   | ,270 | 12,073  | 1  | ,001 | 2,554  |
| VASTY2(14)              | -,272  | ,322 | ,709    | 1  | ,400 | ,762   |
| VASTY2(15)              | ,180   | ,295 | ,373    | 1  | ,541 | 1,198  |
| VASTY2(16)              | ,357   | ,333 | 1,153   | 1  | ,283 | 1,430  |
| VASTY2(17)              | -1,093 | ,418 | 6,818   | 1  | ,009 | ,335   |
| VASTY2(18)              | -,567  | ,379 | 2,246   | 1  | ,134 | ,567   |
| VASTY2(19)              | -1,692 | ,558 | 9,192   | 1  | ,002 | ,184   |
| VASTY2(20)              | -,008  | ,318 | ,001    | 1  | ,981 | ,992   |
| VASTY2(21)              | -,084  | ,312 | ,073    | 1  | ,787 | ,919   |
| VASTY2(22)              | ,246   | ,290 | ,723    | 1  | ,395 | 1,280  |
| VASTY2(23)              | ,277   | ,288 | ,925    | 1  | ,336 | 1,320  |
| VASTY2(24)              | ,296   | ,286 | 1,077   | 1  | ,299 | 1,345  |
| VASTY2(25)              | ,309   | ,302 | 1,048   | 1  | ,306 | 1,363  |
| VASTY2(26)              | -,920  | ,419 | 4,824   | 1  | ,028 | ,398   |
| VASTY2(27)              | -1,507 | ,468 | 10,356  | 1  | ,001 | ,222   |
| VASTY2(28)              | -1,157 | ,480 | 5,805   | 1  | ,016 | ,314   |
| VASTY2(29)              | -1,228 | ,418 | 8,647   | 1  | ,003 | ,293   |
| VASTY2(30)              | -,147  | ,317 | ,216    | 1  | ,642 | ,863   |
| VASTY2(31)              | ,576   | ,288 | 4,009   | 1  | ,045 | 1,779  |
| VASTY2(32)              | ,004   | ,328 | ,000    | 1  | ,991 | 1,004  |
| VASTY2(33)              | ,100   | ,325 | ,094    | 1  | ,759 | 1,105  |
| VASTY2(34)              | -1,256 | ,439 | 8,196   | 1  | ,004 | ,285   |

## Variables in the Equation

|                     |            | 95% C.I. for EXP(B) |       |
|---------------------|------------|---------------------|-------|
|                     |            | Lower               | Upper |
| Step 1 <sup>a</sup> | sv7        |                     |       |
|                     | sv7(1)     | ,622                | 1,131 |
|                     | sv7(2)     | ,684                | 1,273 |
|                     | sv7(3)     | ,666                | 1,229 |
|                     | sv7(4)     | ,701                | 1,245 |
|                     | sv7(5)     | ,738                | 1,272 |
|                     | sv7(6)     | ,876                | 1,609 |
|                     | VASTY2     |                     |       |
|                     | VASTY2(1)  | ,597                | 1,940 |
|                     | VASTY2(2)  | ,925                | 2,785 |
|                     | VASTY2(3)  | ,100                | ,618  |
|                     | VASTY2(4)  | ,700                | 2,203 |
|                     | VASTY2(5)  | ,464                | 1,668 |
|                     | VASTY2(6)  | ,101                | ,585  |
|                     | VASTY2(7)  | 1,126               | 3,274 |
|                     | VASTY2(8)  | ,442                | 1,554 |
|                     | VASTY2(9)  | ,778                | 2,428 |
|                     | VASTY2(10) | 1,532               | 4,379 |
|                     | VASTY2(11) | 1,106               | 3,220 |
|                     | VASTY2(12) | ,614                | 1,978 |
|                     | VASTY2(13) | 1,505               | 4,335 |
|                     | VASTY2(14) | ,405                | 1,434 |
|                     | VASTY2(15) | ,672                | 2,135 |
|                     | VASTY2(16) | ,744                | 2,745 |
|                     | VASTY2(17) | ,148                | ,761  |
|                     | VASTY2(18) | ,270                | 1,191 |
|                     | VASTY2(19) | ,062                | ,550  |
|                     | VASTY2(20) | ,533                | 1,849 |
|                     | VASTY2(21) | ,499                | 1,694 |
|                     | VASTY2(22) | ,725                | 2,259 |
|                     | VASTY2(23) | ,750                | 2,322 |
|                     | VASTY2(24) | ,768                | 2,354 |
|                     | VASTY2(25) | ,754                | 2,464 |
|                     | VASTY2(26) | ,175                | ,906  |
|                     | VASTY2(27) | ,088                | ,555  |
|                     | VASTY2(28) | ,123                | ,806  |
|                     | VASTY2(29) | ,129                | ,664  |
|                     | VASTY2(30) | ,464                | 1,606 |
|                     | VASTY2(31) | 1,012               | 3,126 |
|                     | VASTY2(32) | ,527                | 1,911 |
|                     | VASTY2(33) | ,585                | 2,087 |
|                     | VASTY2(34) | ,121                | ,673  |

## Variables in the Equation

|            | B      | S.E. | Wald   | df | Sig. | Exp(B) |
|------------|--------|------|--------|----|------|--------|
| VASTY2(35) | ,701   | ,277 | 6,408  | 1  | ,011 | 2,016  |
| weekday    |        |      | 12,752 | 6  | ,047 |        |
| weekday(1) | -,004  | ,129 | ,001   | 1  | ,972 | ,996   |
| weekday(2) | -,025  | ,130 | ,038   | 1  | ,845 | ,975   |
| weekday(3) | -,039  | ,131 | ,089   | 1  | ,766 | ,962   |
| weekday(4) | ,046   | ,129 | ,127   | 1  | ,721 | 1,047  |
| weekday(5) | -,230  | ,140 | 2,718  | 1  | ,099 | ,794   |
| weekday(6) | -,371  | ,144 | 6,677  | 1  | ,010 | ,690   |
| holiday(1) | -,443  | ,253 | 3,063  | 1  | ,080 | ,642   |
| season     |        |      | 3,705  | 4  | ,447 |        |
| season(1)  | -,116  | ,113 | 1,048  | 1  | ,306 | ,890   |
| season(2)  | -,124  | ,106 | 1,368  | 1  | ,242 | ,883   |
| season(3)  | ,058   | ,108 | ,288   | 1  | ,592 | 1,060  |
| season(4)  | -,077  | ,115 | ,453   | 1  | ,501 | ,925   |
| Constant   | -2,485 | ,256 | 94,351 | 1  | ,000 | ,083   |

## Variables in the Equation

|            | 95% C.I. for EXP(B) |       |
|------------|---------------------|-------|
|            | Lower               | Upper |
| VASTY2(35) | 1,172               | 3,471 |
| weekday    |                     |       |
| weekday(1) | ,773                | 1,283 |
| weekday(2) | ,755                | 1,258 |
| weekday(3) | ,745                | 1,242 |
| weekday(4) | ,813                | 1,349 |
| weekday(5) | ,604                | 1,044 |
| weekday(6) | ,521                | ,914  |
| holiday(1) | ,391                | 1,055 |
| season     |                     |       |
| season(1)  | ,713                | 1,112 |
| season(2)  | ,717                | 1,088 |
| season(3)  | ,857                | 1,311 |
| season(4)  | ,739                | 1,160 |
| Constant   |                     |       |

a. Variable(s) entered on step 1: sv7, VASTY2, weekday, holiday, season.

\*\*

```
LOGISTIC REGRESSION VARIABLES seurauslt3
/METHOD=ENTER bv1 VASTY2 weekday holiday season
/CONTRAST (bv1)=Indicator(1)
/CONTRAST (VASTY2)=Indicator(1)
```

```

1
2
3 /CONTRAST (weekday)=Indicator(1)
4 /CONTRAST (holiday)=Indicator(1)
5 /CONTRAST (season)=Indicator(1)
6 /PRINT=CI(95)
7
8 /CRITERIA=PIN(0.05) POUT(0.10) ITERATE(20) CUT(0.5).
9

```

## Logistic Regression

[DataSet6] C:\cWordjan\Rafaela\_VCS\alla\_tillsammans\abo\_bjo\_vasa\_v1.sav

### Case Processing Summary

| Unweighted Cases <sup>a</sup> |                      | N     | Percent |
|-------------------------------|----------------------|-------|---------|
| Selected Cases                | Included in Analysis | 12475 | 100,0   |
|                               | Missing Cases        | 0     | ,0      |
|                               | Total                | 12475 | 100,0   |
| Unselected Cases              |                      | 0     | ,0      |
| Total                         |                      | 12475 | 100,0   |

a. If weight is in effect, see classification table for the total number of cases.

### Dependent Variable Encoding

| Original Value                    | Internal Value |
|-----------------------------------|----------------|
| 0 ingen händelse eller ei haittaa | 0              |
| 1 haitta (i någon form)           | 1              |

## Categorical Variables Codings

|                           |           | Frequency | Parameter<br>(1) |
|---------------------------|-----------|-----------|------------------|
| VASTY2 (SAIR*10000)+VASTY | 403073101 | 365       | ,000             |
|                           | 403073102 | 362       | 1,000            |
|                           | 403073103 | 365       | ,000             |
|                           | 403073202 | 365       | ,000             |
|                           | 403073203 | 365       | ,000             |
|                           | 403073204 | 330       | ,000             |
|                           | 403073303 | 364       | ,000             |
|                           | 403073651 | 362       | ,000             |
|                           | 403073771 | 365       | ,000             |
|                           | 403133102 | 341       | ,000             |
|                           | 403133106 | 365       | ,000             |
|                           | 403133107 | 365       | ,000             |
|                           | 403133109 | 365       | ,000             |
|                           | 403133202 | 365       | ,000             |
|                           | 403133203 | 365       | ,000             |
|                           | 403133204 | 365       | ,000             |
|                           | 403133315 | 177       | ,000             |
|                           | 403133322 | 365       | ,000             |
|                           | 403133401 | 362       | ,000             |
|                           | 403133402 | 365       | ,000             |
|                           | 403133550 | 298       | ,000             |
|                           | 403133772 | 365       | ,000             |
|                           | 403135803 | 365       | ,000             |
|                           | 404060001 | 365       | ,000             |
|                           | 404060002 | 366       | ,000             |
|                           | 404310003 | 291       | ,000             |
|                           | 404310004 | 291       | ,000             |
|                           | 502300005 | 366       | ,000             |
|                           | 502300006 | 225       | ,000             |
|                           | 502300007 | 366       | ,000             |
|                           | 502300214 | 366       | ,000             |
|                           | 502300411 | 366       | ,000             |
|                           | 502300415 | 360       | ,000             |
|                           | 502300416 | 363       | ,000             |
|                           | 502300811 | 364       | ,000             |
|                           | 502300913 | 315       | ,000             |
| weekday veckodag          | 1 måndag  | 1805      | ,000             |
|                           | 2 tisdag  | 1812      | 1,000            |



## Categorical Variables Codings

|                           |           | Parameter coding |       |
|---------------------------|-----------|------------------|-------|
|                           |           | (2)              | (3)   |
| VASTY2 (SAIR*10000)+VASTY | 403073101 | ,000             | ,000  |
|                           | 403073102 | ,000             | ,000  |
|                           | 403073103 | 1,000            | ,000  |
|                           | 403073202 | ,000             | 1,000 |
|                           | 403073203 | ,000             | ,000  |
|                           | 403073204 | ,000             | ,000  |
|                           | 403073303 | ,000             | ,000  |
|                           | 403073651 | ,000             | ,000  |
|                           | 403073771 | ,000             | ,000  |
|                           | 403133102 | ,000             | ,000  |
|                           | 403133106 | ,000             | ,000  |
|                           | 403133107 | ,000             | ,000  |
|                           | 403133109 | ,000             | ,000  |
|                           | 403133202 | ,000             | ,000  |
|                           | 403133203 | ,000             | ,000  |
|                           | 403133204 | ,000             | ,000  |
|                           | 403133315 | ,000             | ,000  |
|                           | 403133322 | ,000             | ,000  |
|                           | 403133401 | ,000             | ,000  |
|                           | 403133402 | ,000             | ,000  |
|                           | 403133550 | ,000             | ,000  |
|                           | 403133772 | ,000             | ,000  |
|                           | 403135803 | ,000             | ,000  |
|                           | 404060001 | ,000             | ,000  |
|                           | 404060002 | ,000             | ,000  |
|                           | 404310003 | ,000             | ,000  |
|                           | 404310004 | ,000             | ,000  |
|                           | 502300005 | ,000             | ,000  |
|                           | 502300006 | ,000             | ,000  |
|                           | 502300007 | ,000             | ,000  |
|                           | 502300214 | ,000             | ,000  |
|                           | 502300411 | ,000             | ,000  |
|                           | 502300415 | ,000             | ,000  |
|                           | 502300416 | ,000             | ,000  |
|                           | 502300811 | ,000             | ,000  |
|                           | 502300913 | ,000             | ,000  |
| weekday veckodag          | 1 måndag  | ,000             | ,000  |
|                           | 2 tisdag  | ,000             | ,000  |

## Categorical Variables Codings

|                           |           | Parameter coding |       |
|---------------------------|-----------|------------------|-------|
|                           |           | (4)              | (5)   |
| VASTY2 (SAIR*10000)+VASTY | 403073101 | ,000             | ,000  |
|                           | 403073102 | ,000             | ,000  |
|                           | 403073103 | ,000             | ,000  |
|                           | 403073202 | ,000             | ,000  |
|                           | 403073203 | 1,000            | ,000  |
|                           | 403073204 | ,000             | 1,000 |
|                           | 403073303 | ,000             | ,000  |
|                           | 403073651 | ,000             | ,000  |
|                           | 403073771 | ,000             | ,000  |
|                           | 403133102 | ,000             | ,000  |
|                           | 403133106 | ,000             | ,000  |
|                           | 403133107 | ,000             | ,000  |
|                           | 403133109 | ,000             | ,000  |
|                           | 403133202 | ,000             | ,000  |
|                           | 403133203 | ,000             | ,000  |
|                           | 403133204 | ,000             | ,000  |
|                           | 403133315 | ,000             | ,000  |
|                           | 403133322 | ,000             | ,000  |
|                           | 403133401 | ,000             | ,000  |
|                           | 403133402 | ,000             | ,000  |
|                           | 403133550 | ,000             | ,000  |
|                           | 403133772 | ,000             | ,000  |
|                           | 403135803 | ,000             | ,000  |
|                           | 404060001 | ,000             | ,000  |
|                           | 404060002 | ,000             | ,000  |
|                           | 404310003 | ,000             | ,000  |
|                           | 404310004 | ,000             | ,000  |
|                           | 502300005 | ,000             | ,000  |
|                           | 502300006 | ,000             | ,000  |
|                           | 502300007 | ,000             | ,000  |
|                           | 502300214 | ,000             | ,000  |
|                           | 502300411 | ,000             | ,000  |
|                           | 502300415 | ,000             | ,000  |
|                           | 502300416 | ,000             | ,000  |
|                           | 502300811 | ,000             | ,000  |
|                           | 502300913 | ,000             | ,000  |
| weekday veckodag          | 1 måndag  | ,000             | ,000  |
|                           | 2 tisdag  | ,000             | ,000  |

## Categorical Variables Codings

|                           |           | Parameter coding |       |
|---------------------------|-----------|------------------|-------|
|                           |           | (6)              | (7)   |
| VASTY2 (SAIR*10000)+VASTY | 403073101 | ,000             | ,000  |
|                           | 403073102 | ,000             | ,000  |
|                           | 403073103 | ,000             | ,000  |
|                           | 403073202 | ,000             | ,000  |
|                           | 403073203 | ,000             | ,000  |
|                           | 403073204 | ,000             | ,000  |
|                           | 403073303 | 1,000            | ,000  |
|                           | 403073651 | ,000             | 1,000 |
|                           | 403073771 | ,000             | ,000  |
|                           | 403133102 | ,000             | ,000  |
|                           | 403133106 | ,000             | ,000  |
|                           | 403133107 | ,000             | ,000  |
|                           | 403133109 | ,000             | ,000  |
|                           | 403133202 | ,000             | ,000  |
|                           | 403133203 | ,000             | ,000  |
|                           | 403133204 | ,000             | ,000  |
|                           | 403133315 | ,000             | ,000  |
|                           | 403133322 | ,000             | ,000  |
|                           | 403133401 | ,000             | ,000  |
|                           | 403133402 | ,000             | ,000  |
|                           | 403133550 | ,000             | ,000  |
|                           | 403133772 | ,000             | ,000  |
|                           | 403135803 | ,000             | ,000  |
|                           | 404060001 | ,000             | ,000  |
|                           | 404060002 | ,000             | ,000  |
|                           | 404310003 | ,000             | ,000  |
|                           | 404310004 | ,000             | ,000  |
|                           | 502300005 | ,000             | ,000  |
|                           | 502300006 | ,000             | ,000  |
|                           | 502300007 | ,000             | ,000  |
|                           | 502300214 | ,000             | ,000  |
|                           | 502300411 | ,000             | ,000  |
|                           | 502300415 | ,000             | ,000  |
|                           | 502300416 | ,000             | ,000  |
|                           | 502300811 | ,000             | ,000  |
|                           | 502300913 | ,000             | ,000  |
| weekday veckodag          | 1 måndag  | ,000             |       |
|                           | 2 tisdag  | ,000             |       |

## Categorical Variables Codings

|                           |           | Parameter coding |       |
|---------------------------|-----------|------------------|-------|
|                           |           | (8)              | (9)   |
| VASTY2 (SAIR*10000)+VASTY | 403073101 | ,000             | ,000  |
|                           | 403073102 | ,000             | ,000  |
|                           | 403073103 | ,000             | ,000  |
|                           | 403073202 | ,000             | ,000  |
|                           | 403073203 | ,000             | ,000  |
|                           | 403073204 | ,000             | ,000  |
|                           | 403073303 | ,000             | ,000  |
|                           | 403073651 | ,000             | ,000  |
|                           | 403073771 | 1,000            | ,000  |
|                           | 403133102 | ,000             | 1,000 |
|                           | 403133106 | ,000             | ,000  |
|                           | 403133107 | ,000             | ,000  |
|                           | 403133109 | ,000             | ,000  |
|                           | 403133202 | ,000             | ,000  |
|                           | 403133203 | ,000             | ,000  |
|                           | 403133204 | ,000             | ,000  |
|                           | 403133315 | ,000             | ,000  |
|                           | 403133322 | ,000             | ,000  |
|                           | 403133401 | ,000             | ,000  |
|                           | 403133402 | ,000             | ,000  |
|                           | 403133550 | ,000             | ,000  |
|                           | 403133772 | ,000             | ,000  |
|                           | 403135803 | ,000             | ,000  |
|                           | 404060001 | ,000             | ,000  |
|                           | 404060002 | ,000             | ,000  |
|                           | 404310003 | ,000             | ,000  |
|                           | 404310004 | ,000             | ,000  |
|                           | 502300005 | ,000             | ,000  |
|                           | 502300006 | ,000             | ,000  |
|                           | 502300007 | ,000             | ,000  |
|                           | 502300214 | ,000             | ,000  |
|                           | 502300411 | ,000             | ,000  |
|                           | 502300415 | ,000             | ,000  |
|                           | 502300416 | ,000             | ,000  |
|                           | 502300811 | ,000             | ,000  |
|                           | 502300913 | ,000             | ,000  |
| weekday veckodag          | 1 måndag  |                  |       |
|                           | 2 tisdag  |                  |       |

## Categorical Variables Codings

|                           |           | Parameter coding |       |
|---------------------------|-----------|------------------|-------|
|                           |           | (10)             | (11)  |
| VASTY2 (SAIR*10000)+VASTY | 403073101 | ,000             | ,000  |
|                           | 403073102 | ,000             | ,000  |
|                           | 403073103 | ,000             | ,000  |
|                           | 403073202 | ,000             | ,000  |
|                           | 403073203 | ,000             | ,000  |
|                           | 403073204 | ,000             | ,000  |
|                           | 403073303 | ,000             | ,000  |
|                           | 403073651 | ,000             | ,000  |
|                           | 403073771 | ,000             | ,000  |
|                           | 403133102 | ,000             | ,000  |
|                           | 403133106 | 1,000            | ,000  |
|                           | 403133107 | ,000             | 1,000 |
|                           | 403133109 | ,000             | ,000  |
|                           | 403133202 | ,000             | ,000  |
|                           | 403133203 | ,000             | ,000  |
|                           | 403133204 | ,000             | ,000  |
|                           | 403133315 | ,000             | ,000  |
|                           | 403133322 | ,000             | ,000  |
|                           | 403133401 | ,000             | ,000  |
|                           | 403133402 | ,000             | ,000  |
|                           | 403133550 | ,000             | ,000  |
|                           | 403133772 | ,000             | ,000  |
|                           | 403135803 | ,000             | ,000  |
|                           | 404060001 | ,000             | ,000  |
|                           | 404060002 | ,000             | ,000  |
|                           | 404310003 | ,000             | ,000  |
|                           | 404310004 | ,000             | ,000  |
|                           | 502300005 | ,000             | ,000  |
|                           | 502300006 | ,000             | ,000  |
|                           | 502300007 | ,000             | ,000  |
|                           | 502300214 | ,000             | ,000  |
|                           | 502300411 | ,000             | ,000  |
|                           | 502300415 | ,000             | ,000  |
|                           | 502300416 | ,000             | ,000  |
|                           | 502300811 | ,000             | ,000  |
|                           | 502300913 | ,000             | ,000  |
| weekday veckodag          | 1 måndag  |                  |       |
|                           | 2 tisdag  |                  |       |

## Categorical Variables Codings

|                           |           | Parameter coding |       |
|---------------------------|-----------|------------------|-------|
|                           |           | (12)             | (13)  |
| VASTY2 (SAIR*10000)+VASTY | 403073101 | ,000             | ,000  |
|                           | 403073102 | ,000             | ,000  |
|                           | 403073103 | ,000             | ,000  |
|                           | 403073202 | ,000             | ,000  |
|                           | 403073203 | ,000             | ,000  |
|                           | 403073204 | ,000             | ,000  |
|                           | 403073303 | ,000             | ,000  |
|                           | 403073651 | ,000             | ,000  |
|                           | 403073771 | ,000             | ,000  |
|                           | 403133102 | ,000             | ,000  |
|                           | 403133106 | ,000             | ,000  |
|                           | 403133107 | ,000             | ,000  |
|                           | 403133109 | 1,000            | ,000  |
|                           | 403133202 | ,000             | 1,000 |
|                           | 403133203 | ,000             | ,000  |
|                           | 403133204 | ,000             | ,000  |
|                           | 403133315 | ,000             | ,000  |
|                           | 403133322 | ,000             | ,000  |
|                           | 403133401 | ,000             | ,000  |
|                           | 403133402 | ,000             | ,000  |
|                           | 403133550 | ,000             | ,000  |
|                           | 403133772 | ,000             | ,000  |
|                           | 403135803 | ,000             | ,000  |
|                           | 404060001 | ,000             | ,000  |
|                           | 404060002 | ,000             | ,000  |
|                           | 404310003 | ,000             | ,000  |
|                           | 404310004 | ,000             | ,000  |
|                           | 502300005 | ,000             | ,000  |
|                           | 502300006 | ,000             | ,000  |
|                           | 502300007 | ,000             | ,000  |
|                           | 502300214 | ,000             | ,000  |
|                           | 502300411 | ,000             | ,000  |
|                           | 502300415 | ,000             | ,000  |
|                           | 502300416 | ,000             | ,000  |
|                           | 502300811 | ,000             | ,000  |
|                           | 502300913 | ,000             | ,000  |
| weekday veckodag          | 1 måndag  |                  |       |
|                           | 2 tisdag  |                  |       |

## Categorical Variables Codings

|                           |           | Parameter coding |       |
|---------------------------|-----------|------------------|-------|
|                           |           | (14)             | (15)  |
| VASTY2 (SAIR*10000)+VASTY | 403073101 | ,000             | ,000  |
|                           | 403073102 | ,000             | ,000  |
|                           | 403073103 | ,000             | ,000  |
|                           | 403073202 | ,000             | ,000  |
|                           | 403073203 | ,000             | ,000  |
|                           | 403073204 | ,000             | ,000  |
|                           | 403073303 | ,000             | ,000  |
|                           | 403073651 | ,000             | ,000  |
|                           | 403073771 | ,000             | ,000  |
|                           | 403133102 | ,000             | ,000  |
|                           | 403133106 | ,000             | ,000  |
|                           | 403133107 | ,000             | ,000  |
|                           | 403133109 | ,000             | ,000  |
|                           | 403133202 | ,000             | ,000  |
|                           | 403133203 | 1,000            | ,000  |
|                           | 403133204 | ,000             | 1,000 |
|                           | 403133315 | ,000             | ,000  |
|                           | 403133322 | ,000             | ,000  |
|                           | 403133401 | ,000             | ,000  |
|                           | 403133402 | ,000             | ,000  |
|                           | 403133550 | ,000             | ,000  |
|                           | 403133772 | ,000             | ,000  |
|                           | 403135803 | ,000             | ,000  |
|                           | 404060001 | ,000             | ,000  |
|                           | 404060002 | ,000             | ,000  |
|                           | 404310003 | ,000             | ,000  |
|                           | 404310004 | ,000             | ,000  |
|                           | 502300005 | ,000             | ,000  |
|                           | 502300006 | ,000             | ,000  |
|                           | 502300007 | ,000             | ,000  |
|                           | 502300214 | ,000             | ,000  |
|                           | 502300411 | ,000             | ,000  |
|                           | 502300415 | ,000             | ,000  |
|                           | 502300416 | ,000             | ,000  |
|                           | 502300811 | ,000             | ,000  |
|                           | 502300913 | ,000             | ,000  |
| weekday veckodag          | 1 måndag  |                  |       |
|                           | 2 tisdag  |                  |       |

## Categorical Variables Codings

|                           |           | Parameter coding |       |
|---------------------------|-----------|------------------|-------|
|                           |           | (16)             | (17)  |
| VASTY2 (SAIR*10000)+VASTY | 403073101 | ,000             | ,000  |
|                           | 403073102 | ,000             | ,000  |
|                           | 403073103 | ,000             | ,000  |
|                           | 403073202 | ,000             | ,000  |
|                           | 403073203 | ,000             | ,000  |
|                           | 403073204 | ,000             | ,000  |
|                           | 403073303 | ,000             | ,000  |
|                           | 403073651 | ,000             | ,000  |
|                           | 403073771 | ,000             | ,000  |
|                           | 403133102 | ,000             | ,000  |
|                           | 403133106 | ,000             | ,000  |
|                           | 403133107 | ,000             | ,000  |
|                           | 403133109 | ,000             | ,000  |
|                           | 403133202 | ,000             | ,000  |
|                           | 403133203 | ,000             | ,000  |
|                           | 403133204 | ,000             | ,000  |
|                           | 403133315 | 1,000            | ,000  |
|                           | 403133322 | ,000             | 1,000 |
|                           | 403133401 | ,000             | ,000  |
|                           | 403133402 | ,000             | ,000  |
|                           | 403133550 | ,000             | ,000  |
|                           | 403133772 | ,000             | ,000  |
|                           | 403135803 | ,000             | ,000  |
|                           | 404060001 | ,000             | ,000  |
|                           | 404060002 | ,000             | ,000  |
|                           | 404310003 | ,000             | ,000  |
|                           | 404310004 | ,000             | ,000  |
|                           | 502300005 | ,000             | ,000  |
|                           | 502300006 | ,000             | ,000  |
|                           | 502300007 | ,000             | ,000  |
|                           | 502300214 | ,000             | ,000  |
|                           | 502300411 | ,000             | ,000  |
|                           | 502300415 | ,000             | ,000  |
|                           | 502300416 | ,000             | ,000  |
|                           | 502300811 | ,000             | ,000  |
|                           | 502300913 | ,000             | ,000  |
| weekday veckodag          | 1 måndag  |                  |       |
|                           | 2 tisdag  |                  |       |



## Categorical Variables Codings

|                           |           | Parameter coding |       |
|---------------------------|-----------|------------------|-------|
|                           |           | (18)             | (19)  |
| VASTY2 (SAIR*10000)+VASTY | 403073101 | ,000             | ,000  |
|                           | 403073102 | ,000             | ,000  |
|                           | 403073103 | ,000             | ,000  |
|                           | 403073202 | ,000             | ,000  |
|                           | 403073203 | ,000             | ,000  |
|                           | 403073204 | ,000             | ,000  |
|                           | 403073303 | ,000             | ,000  |
|                           | 403073651 | ,000             | ,000  |
|                           | 403073771 | ,000             | ,000  |
|                           | 403133102 | ,000             | ,000  |
|                           | 403133106 | ,000             | ,000  |
|                           | 403133107 | ,000             | ,000  |
|                           | 403133109 | ,000             | ,000  |
|                           | 403133202 | ,000             | ,000  |
|                           | 403133203 | ,000             | ,000  |
|                           | 403133204 | ,000             | ,000  |
|                           | 403133315 | ,000             | ,000  |
|                           | 403133322 | ,000             | ,000  |
|                           | 403133401 | 1,000            | ,000  |
|                           | 403133402 | ,000             | 1,000 |
|                           | 403133550 | ,000             | ,000  |
|                           | 403133772 | ,000             | ,000  |
|                           | 403135803 | ,000             | ,000  |
|                           | 404060001 | ,000             | ,000  |
|                           | 404060002 | ,000             | ,000  |
|                           | 404310003 | ,000             | ,000  |
|                           | 404310004 | ,000             | ,000  |
|                           | 502300005 | ,000             | ,000  |
|                           | 502300006 | ,000             | ,000  |
|                           | 502300007 | ,000             | ,000  |
|                           | 502300214 | ,000             | ,000  |
|                           | 502300411 | ,000             | ,000  |
|                           | 502300415 | ,000             | ,000  |
|                           | 502300416 | ,000             | ,000  |
|                           | 502300811 | ,000             | ,000  |
|                           | 502300913 | ,000             | ,000  |
| weekday veckodag          | 1 måndag  |                  |       |
|                           | 2 tisdag  |                  |       |

## Categorical Variables Codings

|                           |           | Parameter coding |       |
|---------------------------|-----------|------------------|-------|
|                           |           | (20)             | (21)  |
| VASTY2 (SAIR*10000)+VASTY | 403073101 | ,000             | ,000  |
|                           | 403073102 | ,000             | ,000  |
|                           | 403073103 | ,000             | ,000  |
|                           | 403073202 | ,000             | ,000  |
|                           | 403073203 | ,000             | ,000  |
|                           | 403073204 | ,000             | ,000  |
|                           | 403073303 | ,000             | ,000  |
|                           | 403073651 | ,000             | ,000  |
|                           | 403073771 | ,000             | ,000  |
|                           | 403133102 | ,000             | ,000  |
|                           | 403133106 | ,000             | ,000  |
|                           | 403133107 | ,000             | ,000  |
|                           | 403133109 | ,000             | ,000  |
|                           | 403133202 | ,000             | ,000  |
|                           | 403133203 | ,000             | ,000  |
|                           | 403133204 | ,000             | ,000  |
|                           | 403133315 | ,000             | ,000  |
|                           | 403133322 | ,000             | ,000  |
|                           | 403133401 | ,000             | ,000  |
|                           | 403133402 | ,000             | ,000  |
|                           | 403133550 | 1,000            | ,000  |
|                           | 403133772 | ,000             | 1,000 |
|                           | 403135803 | ,000             | ,000  |
|                           | 404060001 | ,000             | ,000  |
|                           | 404060002 | ,000             | ,000  |
|                           | 404310003 | ,000             | ,000  |
|                           | 404310004 | ,000             | ,000  |
|                           | 502300005 | ,000             | ,000  |
|                           | 502300006 | ,000             | ,000  |
|                           | 502300007 | ,000             | ,000  |
|                           | 502300214 | ,000             | ,000  |
|                           | 502300411 | ,000             | ,000  |
|                           | 502300415 | ,000             | ,000  |
|                           | 502300416 | ,000             | ,000  |
|                           | 502300811 | ,000             | ,000  |
|                           | 502300913 | ,000             | ,000  |
| weekday veckodag          | 1 måndag  |                  |       |
|                           | 2 tisdag  |                  |       |

## Categorical Variables Codings

|                           |           | Parameter coding |       |
|---------------------------|-----------|------------------|-------|
|                           |           | (22)             | (23)  |
| VASTY2 (SAIR*10000)+VASTY | 403073101 | ,000             | ,000  |
|                           | 403073102 | ,000             | ,000  |
|                           | 403073103 | ,000             | ,000  |
|                           | 403073202 | ,000             | ,000  |
|                           | 403073203 | ,000             | ,000  |
|                           | 403073204 | ,000             | ,000  |
|                           | 403073303 | ,000             | ,000  |
|                           | 403073651 | ,000             | ,000  |
|                           | 403073771 | ,000             | ,000  |
|                           | 403133102 | ,000             | ,000  |
|                           | 403133106 | ,000             | ,000  |
|                           | 403133107 | ,000             | ,000  |
|                           | 403133109 | ,000             | ,000  |
|                           | 403133202 | ,000             | ,000  |
|                           | 403133203 | ,000             | ,000  |
|                           | 403133204 | ,000             | ,000  |
|                           | 403133315 | ,000             | ,000  |
|                           | 403133322 | ,000             | ,000  |
|                           | 403133401 | ,000             | ,000  |
|                           | 403133402 | ,000             | ,000  |
|                           | 403133550 | ,000             | ,000  |
|                           | 403133772 | ,000             | ,000  |
|                           | 403135803 | 1,000            | ,000  |
|                           | 404060001 | ,000             | 1,000 |
|                           | 404060002 | ,000             | ,000  |
|                           | 404310003 | ,000             | ,000  |
|                           | 404310004 | ,000             | ,000  |
|                           | 502300005 | ,000             | ,000  |
|                           | 502300006 | ,000             | ,000  |
|                           | 502300007 | ,000             | ,000  |
|                           | 502300214 | ,000             | ,000  |
|                           | 502300411 | ,000             | ,000  |
|                           | 502300415 | ,000             | ,000  |
|                           | 502300416 | ,000             | ,000  |
|                           | 502300811 | ,000             | ,000  |
|                           | 502300913 | ,000             | ,000  |
| weekday veckodag          | 1 måndag  |                  |       |
|                           | 2 tisdag  |                  |       |

## Categorical Variables Codings

|                           |           | Parameter coding |       |
|---------------------------|-----------|------------------|-------|
|                           |           | (24)             | (25)  |
| VASTY2 (SAIR*10000)+VASTY | 403073101 | ,000             | ,000  |
|                           | 403073102 | ,000             | ,000  |
|                           | 403073103 | ,000             | ,000  |
|                           | 403073202 | ,000             | ,000  |
|                           | 403073203 | ,000             | ,000  |
|                           | 403073204 | ,000             | ,000  |
|                           | 403073303 | ,000             | ,000  |
|                           | 403073651 | ,000             | ,000  |
|                           | 403073771 | ,000             | ,000  |
|                           | 403133102 | ,000             | ,000  |
|                           | 403133106 | ,000             | ,000  |
|                           | 403133107 | ,000             | ,000  |
|                           | 403133109 | ,000             | ,000  |
|                           | 403133202 | ,000             | ,000  |
|                           | 403133203 | ,000             | ,000  |
|                           | 403133204 | ,000             | ,000  |
|                           | 403133315 | ,000             | ,000  |
|                           | 403133322 | ,000             | ,000  |
|                           | 403133401 | ,000             | ,000  |
|                           | 403133402 | ,000             | ,000  |
|                           | 403133550 | ,000             | ,000  |
|                           | 403133772 | ,000             | ,000  |
|                           | 403135803 | ,000             | ,000  |
|                           | 404060001 | ,000             | ,000  |
|                           | 404060002 | 1,000            | ,000  |
|                           | 404310003 | ,000             | 1,000 |
|                           | 404310004 | ,000             | ,000  |
|                           | 502300005 | ,000             | ,000  |
|                           | 502300006 | ,000             | ,000  |
|                           | 502300007 | ,000             | ,000  |
|                           | 502300214 | ,000             | ,000  |
|                           | 502300411 | ,000             | ,000  |
|                           | 502300415 | ,000             | ,000  |
|                           | 502300416 | ,000             | ,000  |
|                           | 502300811 | ,000             | ,000  |
|                           | 502300913 | ,000             | ,000  |
| weekday veckodag          | 1 måndag  |                  |       |
|                           | 2 tisdag  |                  |       |

## Categorical Variables Codings

|                           |           | Parameter coding |       |
|---------------------------|-----------|------------------|-------|
|                           |           | (26)             | (27)  |
| VASTY2 (SAIR*10000)+VASTY | 403073101 | ,000             | ,000  |
|                           | 403073102 | ,000             | ,000  |
|                           | 403073103 | ,000             | ,000  |
|                           | 403073202 | ,000             | ,000  |
|                           | 403073203 | ,000             | ,000  |
|                           | 403073204 | ,000             | ,000  |
|                           | 403073303 | ,000             | ,000  |
|                           | 403073651 | ,000             | ,000  |
|                           | 403073771 | ,000             | ,000  |
|                           | 403133102 | ,000             | ,000  |
|                           | 403133106 | ,000             | ,000  |
|                           | 403133107 | ,000             | ,000  |
|                           | 403133109 | ,000             | ,000  |
|                           | 403133202 | ,000             | ,000  |
|                           | 403133203 | ,000             | ,000  |
|                           | 403133204 | ,000             | ,000  |
|                           | 403133315 | ,000             | ,000  |
|                           | 403133322 | ,000             | ,000  |
|                           | 403133401 | ,000             | ,000  |
|                           | 403133402 | ,000             | ,000  |
|                           | 403133550 | ,000             | ,000  |
|                           | 403133772 | ,000             | ,000  |
|                           | 403135803 | ,000             | ,000  |
|                           | 404060001 | ,000             | ,000  |
|                           | 404060002 | ,000             | ,000  |
|                           | 404310003 | ,000             | ,000  |
|                           | 404310004 | 1,000            | ,000  |
|                           | 502300005 | ,000             | 1,000 |
|                           | 502300006 | ,000             | ,000  |
|                           | 502300007 | ,000             | ,000  |
|                           | 502300214 | ,000             | ,000  |
|                           | 502300411 | ,000             | ,000  |
|                           | 502300415 | ,000             | ,000  |
|                           | 502300416 | ,000             | ,000  |
|                           | 502300811 | ,000             | ,000  |
|                           | 502300913 | ,000             | ,000  |
| weekday veckodag          | 1 måndag  |                  |       |
|                           | 2 tisdag  |                  |       |

## Categorical Variables Codings

|                           |           | Parameter coding |       |
|---------------------------|-----------|------------------|-------|
|                           |           | (28)             | (29)  |
| VASTY2 (SAIR*10000)+VASTY | 403073101 | ,000             | ,000  |
|                           | 403073102 | ,000             | ,000  |
|                           | 403073103 | ,000             | ,000  |
|                           | 403073202 | ,000             | ,000  |
|                           | 403073203 | ,000             | ,000  |
|                           | 403073204 | ,000             | ,000  |
|                           | 403073303 | ,000             | ,000  |
|                           | 403073651 | ,000             | ,000  |
|                           | 403073771 | ,000             | ,000  |
|                           | 403133102 | ,000             | ,000  |
|                           | 403133106 | ,000             | ,000  |
|                           | 403133107 | ,000             | ,000  |
|                           | 403133109 | ,000             | ,000  |
|                           | 403133202 | ,000             | ,000  |
|                           | 403133203 | ,000             | ,000  |
|                           | 403133204 | ,000             | ,000  |
|                           | 403133315 | ,000             | ,000  |
|                           | 403133322 | ,000             | ,000  |
|                           | 403133401 | ,000             | ,000  |
|                           | 403133402 | ,000             | ,000  |
|                           | 403133550 | ,000             | ,000  |
|                           | 403133772 | ,000             | ,000  |
|                           | 403135803 | ,000             | ,000  |
|                           | 404060001 | ,000             | ,000  |
|                           | 404060002 | ,000             | ,000  |
|                           | 404310003 | ,000             | ,000  |
|                           | 404310004 | ,000             | ,000  |
|                           | 502300005 | ,000             | ,000  |
|                           | 502300006 | 1,000            | ,000  |
|                           | 502300007 | ,000             | 1,000 |
|                           | 502300214 | ,000             | ,000  |
|                           | 502300411 | ,000             | ,000  |
|                           | 502300415 | ,000             | ,000  |
|                           | 502300416 | ,000             | ,000  |
|                           | 502300811 | ,000             | ,000  |
|                           | 502300913 | ,000             | ,000  |
| weekday veckodag          | 1 måndag  |                  |       |
|                           | 2 tisdag  |                  |       |

## Categorical Variables Codings

|                           |           | Parameter coding |       |
|---------------------------|-----------|------------------|-------|
|                           |           | (30)             | (31)  |
| VASTY2 (SAIR*10000)+VASTY | 403073101 | ,000             | ,000  |
|                           | 403073102 | ,000             | ,000  |
|                           | 403073103 | ,000             | ,000  |
|                           | 403073202 | ,000             | ,000  |
|                           | 403073203 | ,000             | ,000  |
|                           | 403073204 | ,000             | ,000  |
|                           | 403073303 | ,000             | ,000  |
|                           | 403073651 | ,000             | ,000  |
|                           | 403073771 | ,000             | ,000  |
|                           | 403133102 | ,000             | ,000  |
|                           | 403133106 | ,000             | ,000  |
|                           | 403133107 | ,000             | ,000  |
|                           | 403133109 | ,000             | ,000  |
|                           | 403133202 | ,000             | ,000  |
|                           | 403133203 | ,000             | ,000  |
|                           | 403133204 | ,000             | ,000  |
|                           | 403133315 | ,000             | ,000  |
|                           | 403133322 | ,000             | ,000  |
|                           | 403133401 | ,000             | ,000  |
|                           | 403133402 | ,000             | ,000  |
|                           | 403133550 | ,000             | ,000  |
|                           | 403133772 | ,000             | ,000  |
|                           | 403135803 | ,000             | ,000  |
|                           | 404060001 | ,000             | ,000  |
|                           | 404060002 | ,000             | ,000  |
|                           | 404310003 | ,000             | ,000  |
|                           | 404310004 | ,000             | ,000  |
|                           | 502300005 | ,000             | ,000  |
|                           | 502300006 | ,000             | ,000  |
|                           | 502300007 | ,000             | ,000  |
|                           | 502300214 | 1,000            | ,000  |
|                           | 502300411 | ,000             | 1,000 |
|                           | 502300415 | ,000             | ,000  |
|                           | 502300416 | ,000             | ,000  |
|                           | 502300811 | ,000             | ,000  |
|                           | 502300913 | ,000             | ,000  |
| weekday veckodag          | 1 måndag  |                  |       |
|                           | 2 tisdag  |                  |       |

## Categorical Variables Codings

|                           |           | Parameter coding |       |
|---------------------------|-----------|------------------|-------|
|                           |           | (32)             | (33)  |
| VASTY2 (SAIR*10000)+VASTY | 403073101 | ,000             | ,000  |
|                           | 403073102 | ,000             | ,000  |
|                           | 403073103 | ,000             | ,000  |
|                           | 403073202 | ,000             | ,000  |
|                           | 403073203 | ,000             | ,000  |
|                           | 403073204 | ,000             | ,000  |
|                           | 403073303 | ,000             | ,000  |
|                           | 403073651 | ,000             | ,000  |
|                           | 403073771 | ,000             | ,000  |
|                           | 403133102 | ,000             | ,000  |
|                           | 403133106 | ,000             | ,000  |
|                           | 403133107 | ,000             | ,000  |
|                           | 403133109 | ,000             | ,000  |
|                           | 403133202 | ,000             | ,000  |
|                           | 403133203 | ,000             | ,000  |
|                           | 403133204 | ,000             | ,000  |
|                           | 403133315 | ,000             | ,000  |
|                           | 403133322 | ,000             | ,000  |
|                           | 403133401 | ,000             | ,000  |
|                           | 403133402 | ,000             | ,000  |
|                           | 403133550 | ,000             | ,000  |
|                           | 403133772 | ,000             | ,000  |
|                           | 403135803 | ,000             | ,000  |
|                           | 404060001 | ,000             | ,000  |
|                           | 404060002 | ,000             | ,000  |
|                           | 404310003 | ,000             | ,000  |
|                           | 404310004 | ,000             | ,000  |
|                           | 502300005 | ,000             | ,000  |
|                           | 502300006 | ,000             | ,000  |
|                           | 502300007 | ,000             | ,000  |
|                           | 502300214 | ,000             | ,000  |
|                           | 502300411 | ,000             | ,000  |
|                           | 502300415 | 1,000            | ,000  |
|                           | 502300416 | ,000             | 1,000 |
|                           | 502300811 | ,000             | ,000  |
|                           | 502300913 | ,000             | ,000  |
| weekday veckodag          | 1 måndag  |                  |       |
|                           | 2 tisdag  |                  |       |



## Categorical Variables Codings

|                           |           | Parameter coding |       |
|---------------------------|-----------|------------------|-------|
|                           |           | (34)             | (35)  |
| VASTY2 (SAIR*10000)+VASTY | 403073101 | ,000             | ,000  |
|                           | 403073102 | ,000             | ,000  |
|                           | 403073103 | ,000             | ,000  |
|                           | 403073202 | ,000             | ,000  |
|                           | 403073203 | ,000             | ,000  |
|                           | 403073204 | ,000             | ,000  |
|                           | 403073303 | ,000             | ,000  |
|                           | 403073651 | ,000             | ,000  |
|                           | 403073771 | ,000             | ,000  |
|                           | 403133102 | ,000             | ,000  |
|                           | 403133106 | ,000             | ,000  |
|                           | 403133107 | ,000             | ,000  |
|                           | 403133109 | ,000             | ,000  |
|                           | 403133202 | ,000             | ,000  |
|                           | 403133203 | ,000             | ,000  |
|                           | 403133204 | ,000             | ,000  |
|                           | 403133315 | ,000             | ,000  |
|                           | 403133322 | ,000             | ,000  |
|                           | 403133401 | ,000             | ,000  |
|                           | 403133402 | ,000             | ,000  |
|                           | 403133550 | ,000             | ,000  |
|                           | 403133772 | ,000             | ,000  |
|                           | 403135803 | ,000             | ,000  |
|                           | 404060001 | ,000             | ,000  |
|                           | 404060002 | ,000             | ,000  |
|                           | 404310003 | ,000             | ,000  |
|                           | 404310004 | ,000             | ,000  |
|                           | 502300005 | ,000             | ,000  |
|                           | 502300006 | ,000             | ,000  |
|                           | 502300007 | ,000             | ,000  |
|                           | 502300214 | ,000             | ,000  |
|                           | 502300411 | ,000             | ,000  |
|                           | 502300415 | ,000             | ,000  |
|                           | 502300416 | ,000             | ,000  |
|                           | 502300811 | 1,000            | ,000  |
|                           | 502300913 | ,000             | 1,000 |
| weekday veckodag          | 1 måndag  |                  |       |
|                           | 2 tisdag  |                  |       |

## Categorical Variables Codings

|                           |                                         | Frequency | Parameter |
|---------------------------|-----------------------------------------|-----------|-----------|
|                           |                                         |           | (1)       |
|                           | 3 onsdag                                | 1800      | ,000      |
|                           | 4 torsdag                               | 1794      | ,000      |
|                           | 5 fredag                                | 1788      | ,000      |
|                           | 6 lördag                                | 1735      | ,000      |
|                           | 7 söndag                                | 1741      | ,000      |
| season säsong/period      | 1 januari-mars                          | 3182      | ,000      |
|                           | 2 april-maj                             | 2127      | 1,000     |
|                           | 3 juni-augusti                          | 2911      | ,000      |
|                           | 4 september-oktober                     | 2144      | ,000      |
|                           | 5 november-december                     | 2111      | ,000      |
| bv1 belastning vs paoncil | 1 medelbelastning                       | 5380      | ,000      |
|                           | 2 underbelastning                       | 3222      | 1,000     |
|                           | 3 överbelastning                        | 3873      | ,000      |
| holiday större helg       | 1 ingen större helg                     | 12078     | ,000      |
|                           | 2 större helg (påsk/midsommar/julonyår) | 397       | 1,000     |

## Categorical Variables Codings

|                           |                                         | Parameter coding |       |
|---------------------------|-----------------------------------------|------------------|-------|
|                           |                                         | (2)              | (3)   |
|                           | 3 onsdag                                | 1,000            | ,000  |
|                           | 4 torsdag                               | ,000             | 1,000 |
|                           | 5 fredag                                | ,000             | ,000  |
|                           | 6 lördag                                | ,000             | ,000  |
|                           | 7 söndag                                | ,000             | ,000  |
| season säsong/period      | 1 januari-mars                          | ,000             | ,000  |
|                           | 2 april-maj                             | ,000             | ,000  |
|                           | 3 juni-augusti                          | 1,000            | ,000  |
|                           | 4 september-oktober                     | ,000             | 1,000 |
|                           | 5 november-december                     | ,000             | ,000  |
| bv1 belastning vs paoncil | 1 medelbelastning                       | ,000             |       |
|                           | 2 underbelastning                       | ,000             |       |
|                           | 3 överbelastning                        | 1,000            |       |
| holiday större helg       | 1 ingen större helg                     |                  |       |
|                           | 2 större helg (påsk/midsommar/julonyår) |                  |       |

## Categorical Variables Codings

|                           |                                         | Parameter coding |       |
|---------------------------|-----------------------------------------|------------------|-------|
|                           |                                         | (4)              | (5)   |
| season säsong/period      | 3 onsdag                                | ,000             | ,000  |
|                           | 4 torsdag                               | ,000             | ,000  |
|                           | 5 fredag                                | 1,000            | ,000  |
|                           | 6 lördag                                | ,000             | 1,000 |
|                           | 7 söndag                                | ,000             | ,000  |
|                           | 1 januari-mars                          | ,000             |       |
|                           | 2 april-maj                             | ,000             |       |
| bv1 belastning vs paoncil | 3 juni-augusti                          | ,000             |       |
|                           | 4 september-oktober                     | ,000             |       |
|                           | 5 november-december                     | 1,000            |       |
|                           | 1 medelbelastning                       |                  |       |
| holiday större helg       | 2 underbelastning                       |                  |       |
|                           | 3 överbelastning                        |                  |       |
|                           | 1 ingen större helg                     |                  |       |
|                           | 2 större helg (påsk/midsommar/julonyår) |                  |       |

## Categorical Variables Codings

|                           |                                         | Parameter coding |     |
|---------------------------|-----------------------------------------|------------------|-----|
|                           |                                         | (6)              | (7) |
| season säsong/period      | 3 onsdag                                | ,000             |     |
|                           | 4 torsdag                               | ,000             |     |
|                           | 5 fredag                                | ,000             |     |
|                           | 6 lördag                                | ,000             |     |
|                           | 7 söndag                                | 1,000            |     |
|                           | 1 januari-mars                          |                  |     |
|                           | 2 april-maj                             |                  |     |
| bv1 belastning vs paoncil | 3 juni-augusti                          |                  |     |
|                           | 4 september-oktober                     |                  |     |
|                           | 5 november-december                     |                  |     |
|                           | 1 medelbelastning                       |                  |     |
| holiday större helg       | 2 underbelastning                       |                  |     |
|                           | 3 överbelastning                        |                  |     |
|                           | 1 ingen större helg                     |                  |     |
|                           | 2 större helg (påsk/midsommar/julonyår) |                  |     |

## Categorical Variables Codings

|                           |                                         | Parameter coding |     |
|---------------------------|-----------------------------------------|------------------|-----|
|                           |                                         | (8)              | (9) |
|                           | 3 onsdag                                |                  |     |
|                           | 4 torsdag                               |                  |     |
|                           | 5 fredag                                |                  |     |
|                           | 6 lördag                                |                  |     |
|                           | 7 söndag                                |                  |     |
| season säsong/period      | 1 januari-mars                          |                  |     |
|                           | 2 april-maj                             |                  |     |
|                           | 3 juni-augusti                          |                  |     |
|                           | 4 september-oktober                     |                  |     |
|                           | 5 november-december                     |                  |     |
| bv1 belastning vs paoncil | 1 medelbelastning                       |                  |     |
|                           | 2 underbelastning                       |                  |     |
|                           | 3 överbelastning                        |                  |     |
| holiday större helg       | 1 ingen större helg                     |                  |     |
|                           | 2 större helg (påsk/midsommar/julonyår) |                  |     |

## Categorical Variables Codings

|                           |                                         | Parameter coding |      |
|---------------------------|-----------------------------------------|------------------|------|
|                           |                                         | (10)             | (11) |
|                           | 3 onsdag                                |                  |      |
|                           | 4 torsdag                               |                  |      |
|                           | 5 fredag                                |                  |      |
|                           | 6 lördag                                |                  |      |
|                           | 7 söndag                                |                  |      |
| season säsong/period      | 1 januari-mars                          |                  |      |
|                           | 2 april-maj                             |                  |      |
|                           | 3 juni-augusti                          |                  |      |
|                           | 4 september-oktober                     |                  |      |
|                           | 5 november-december                     |                  |      |
| bv1 belastning vs paoncil | 1 medelbelastning                       |                  |      |
|                           | 2 underbelastning                       |                  |      |
|                           | 3 överbelastning                        |                  |      |
| holiday större helg       | 1 ingen större helg                     |                  |      |
|                           | 2 större helg (påsk/midsommar/julonyår) |                  |      |

## Categorical Variables Codings

|                           |                                         | Parameter coding |      |
|---------------------------|-----------------------------------------|------------------|------|
|                           |                                         | (12)             | (13) |
| season säsong/period      | 3 onsdag                                |                  |      |
|                           | 4 torsdag                               |                  |      |
|                           | 5 fredag                                |                  |      |
|                           | 6 lördag                                |                  |      |
|                           | 7 söndag                                |                  |      |
|                           | 1 januari-mars                          |                  |      |
|                           | 2 april-maj                             |                  |      |
| bv1 belastning vs paencil | 3 juni-augusti                          |                  |      |
|                           | 4 september-oktober                     |                  |      |
|                           | 5 november-december                     |                  |      |
| holiday större helg       | 1 ingen större helg                     |                  |      |
|                           | 2 större helg (påsk/midsommar/julonyår) |                  |      |
|                           |                                         |                  |      |

## Categorical Variables Codings

|                           |                                         | Parameter coding |      |
|---------------------------|-----------------------------------------|------------------|------|
|                           |                                         | (14)             | (15) |
| season säsong/period      | 3 onsdag                                |                  |      |
|                           | 4 torsdag                               |                  |      |
|                           | 5 fredag                                |                  |      |
|                           | 6 lördag                                |                  |      |
|                           | 7 söndag                                |                  |      |
|                           | 1 januari-mars                          |                  |      |
|                           | 2 april-maj                             |                  |      |
| bv1 belastning vs paencil | 3 juni-augusti                          |                  |      |
|                           | 4 september-oktober                     |                  |      |
|                           | 5 november-december                     |                  |      |
| holiday större helg       | 1 ingen större helg                     |                  |      |
|                           | 2 större helg (påsk/midsommar/julonyår) |                  |      |
|                           |                                         |                  |      |

## Categorical Variables Codings

|                           |                                         | Parameter coding |      |
|---------------------------|-----------------------------------------|------------------|------|
|                           |                                         | (16)             | (17) |
| season säsong/period      | 3 onsdag                                |                  |      |
|                           | 4 torsdag                               |                  |      |
|                           | 5 fredag                                |                  |      |
|                           | 6 lördag                                |                  |      |
|                           | 7 söndag                                |                  |      |
|                           | 1 januari-mars                          |                  |      |
|                           | 2 april-maj                             |                  |      |
| bv1 belastning vs paoncil | 3 juni-augusti                          |                  |      |
|                           | 4 september-oktober                     |                  |      |
|                           | 5 november-december                     |                  |      |
| holiday större helg       | 1 ingen större helg                     |                  |      |
|                           | 2 större helg (påsk/midsommar/julonyår) |                  |      |

## Categorical Variables Codings

|                           |                                         | Parameter coding |      |
|---------------------------|-----------------------------------------|------------------|------|
|                           |                                         | (18)             | (19) |
| season säsong/period      | 3 onsdag                                |                  |      |
|                           | 4 torsdag                               |                  |      |
|                           | 5 fredag                                |                  |      |
|                           | 6 lördag                                |                  |      |
|                           | 7 söndag                                |                  |      |
|                           | 1 januari-mars                          |                  |      |
|                           | 2 april-maj                             |                  |      |
| bv1 belastning vs paoncil | 3 juni-augusti                          |                  |      |
|                           | 4 september-oktober                     |                  |      |
|                           | 5 november-december                     |                  |      |
| holiday större helg       | 1 ingen större helg                     |                  |      |
|                           | 2 större helg (påsk/midsommar/julonyår) |                  |      |

## Categorical Variables Codings

|                           |                                         | Parameter coding |      |
|---------------------------|-----------------------------------------|------------------|------|
|                           |                                         | (20)             | (21) |
| season säsong/period      | 3 onsdag                                |                  |      |
|                           | 4 torsdag                               |                  |      |
|                           | 5 fredag                                |                  |      |
|                           | 6 lördag                                |                  |      |
|                           | 7 söndag                                |                  |      |
|                           | 1 januari-mars                          |                  |      |
|                           | 2 april-maj                             |                  |      |
| bv1 belastning vs paoncil | 3 juni-augusti                          |                  |      |
|                           | 4 september-oktober                     |                  |      |
|                           | 5 november-december                     |                  |      |
| holiday större helg       | 1 ingen större helg                     |                  |      |
|                           | 2 större helg (påsk/midsommar/julonyår) |                  |      |

## Categorical Variables Codings

|                           |                                         | Parameter coding |      |
|---------------------------|-----------------------------------------|------------------|------|
|                           |                                         | (22)             | (23) |
| season säsong/period      | 3 onsdag                                |                  |      |
|                           | 4 torsdag                               |                  |      |
|                           | 5 fredag                                |                  |      |
|                           | 6 lördag                                |                  |      |
|                           | 7 söndag                                |                  |      |
|                           | 1 januari-mars                          |                  |      |
|                           | 2 april-maj                             |                  |      |
| bv1 belastning vs paoncil | 3 juni-augusti                          |                  |      |
|                           | 4 september-oktober                     |                  |      |
|                           | 5 november-december                     |                  |      |
| holiday större helg       | 1 ingen större helg                     |                  |      |
|                           | 2 större helg (påsk/midsommar/julonyår) |                  |      |

## Categorical Variables Codings

|                           |                                         | Parameter coding |      |
|---------------------------|-----------------------------------------|------------------|------|
|                           |                                         | (24)             | (25) |
| season säsong/period      | 3 onsdag                                |                  |      |
|                           | 4 torsdag                               |                  |      |
|                           | 5 fredag                                |                  |      |
|                           | 6 lördag                                |                  |      |
|                           | 7 söndag                                |                  |      |
|                           | 1 januari-mars                          |                  |      |
|                           | 2 april-maj                             |                  |      |
| bv1 belastning vs paoncil | 3 juni-augusti                          |                  |      |
|                           | 4 september-oktober                     |                  |      |
|                           | 5 november-december                     |                  |      |
| holiday större helg       | 1 ingen större helg                     |                  |      |
|                           | 2 större helg (påsk/midsommar/julonyår) |                  |      |

## Categorical Variables Codings

|                           |                                         | Parameter coding |      |
|---------------------------|-----------------------------------------|------------------|------|
|                           |                                         | (26)             | (27) |
| season säsong/period      | 3 onsdag                                |                  |      |
|                           | 4 torsdag                               |                  |      |
|                           | 5 fredag                                |                  |      |
|                           | 6 lördag                                |                  |      |
|                           | 7 söndag                                |                  |      |
|                           | 1 januari-mars                          |                  |      |
|                           | 2 april-maj                             |                  |      |
| bv1 belastning vs paoncil | 3 juni-augusti                          |                  |      |
|                           | 4 september-oktober                     |                  |      |
|                           | 5 november-december                     |                  |      |
| holiday större helg       | 1 ingen större helg                     |                  |      |
|                           | 2 större helg (påsk/midsommar/julonyår) |                  |      |



1  
2  
3  
4  
5  
6  
7  
8  
9  
10  
11  
12  
13  
14  
15  
16  
17  
18  
19  
20  
21  
22  
23  
24  
25  
26  
27  
28  
29  
30  
31  
32  
33  
34  
35  
36  
37  
38  
39  
40  
41  
42  
43  
44  
45  
46  
47  
48  
49  
50  
51  
52  
53  
54  
55  
56  
57  
58  
59  
60

**Categorical Variables Codings**

|                           |                                         | Parameter coding |      |
|---------------------------|-----------------------------------------|------------------|------|
|                           |                                         | (28)             | (29) |
| season säsong/period      | 3 onsdag                                |                  |      |
|                           | 4 torsdag                               |                  |      |
|                           | 5 fredag                                |                  |      |
|                           | 6 lördag                                |                  |      |
|                           | 7 söndag                                |                  |      |
|                           | 1 januari-mars                          |                  |      |
|                           | 2 april-maj                             |                  |      |
| bv1 belastning vs paoncil | 3 juni-augusti                          |                  |      |
|                           | 4 september-oktober                     |                  |      |
|                           | 5 november-december                     |                  |      |
| holiday större helg       | 1 ingen större helg                     |                  |      |
|                           | 2 större helg (påsk/midsommar/julonyår) |                  |      |

**Categorical Variables Codings**

|                           |                                         | Parameter coding |      |
|---------------------------|-----------------------------------------|------------------|------|
|                           |                                         | (30)             | (31) |
| season säsong/period      | 3 onsdag                                |                  |      |
|                           | 4 torsdag                               |                  |      |
|                           | 5 fredag                                |                  |      |
|                           | 6 lördag                                |                  |      |
|                           | 7 söndag                                |                  |      |
|                           | 1 januari-mars                          |                  |      |
|                           | 2 april-maj                             |                  |      |
| bv1 belastning vs paoncil | 3 juni-augusti                          |                  |      |
|                           | 4 september-oktober                     |                  |      |
|                           | 5 november-december                     |                  |      |
| holiday större helg       | 1 ingen större helg                     |                  |      |
|                           | 2 större helg (påsk/midsommar/julonyår) |                  |      |

## Categorical Variables Codings

|                           |                                         | Parameter coding |      |
|---------------------------|-----------------------------------------|------------------|------|
|                           |                                         | (32)             | (33) |
| season säsong/period      | 3 onsdag                                |                  |      |
|                           | 4 torsdag                               |                  |      |
|                           | 5 fredag                                |                  |      |
|                           | 6 lördag                                |                  |      |
|                           | 7 söndag                                |                  |      |
|                           | 1 januari-mars                          |                  |      |
|                           | 2 april-maj                             |                  |      |
| bv1 belastning vs paoncil | 3 juni-augusti                          |                  |      |
|                           | 4 september-oktober                     |                  |      |
|                           | 5 november-december                     |                  |      |
| holiday större helg       | 1 ingen större helg                     |                  |      |
|                           | 2 större helg (påsk/midsommar/julonyår) |                  |      |

## Categorical Variables Codings

|                           |                                         | Parameter coding |      |
|---------------------------|-----------------------------------------|------------------|------|
|                           |                                         | (34)             | (35) |
| season säsong/period      | 3 onsdag                                |                  |      |
|                           | 4 torsdag                               |                  |      |
|                           | 5 fredag                                |                  |      |
|                           | 6 lördag                                |                  |      |
|                           | 7 söndag                                |                  |      |
|                           | 1 januari-mars                          |                  |      |
|                           | 2 april-maj                             |                  |      |
| bv1 belastning vs paoncil | 3 juni-augusti                          |                  |      |
|                           | 4 september-oktober                     |                  |      |
|                           | 5 november-december                     |                  |      |
| holiday större helg       | 1 ingen större helg                     |                  |      |
|                           | 2 större helg (påsk/midsommar/julonyår) |                  |      |

**Block 0: Beginning Block**

Classification Table<sup>a,b</sup>

|        |                                                   |                                                              |
|--------|---------------------------------------------------|--------------------------------------------------------------|
|        | Observed                                          |                                                              |
| Step 0 | seuraust3 seuraus highest = haitta (i någon form) | 0 ingen händelse eller ei haittaa<br>1 haitta (i någon form) |
|        | Overall Percentage                                |                                                              |

Classification Table<sup>a,b</sup>

|        |                                                   |                                                              |                                   |
|--------|---------------------------------------------------|--------------------------------------------------------------|-----------------------------------|
|        |                                                   |                                                              | Predicted                         |
|        |                                                   |                                                              | seuraust3 seuraus highest         |
|        |                                                   |                                                              | 0 ingen händelse eller ei haittaa |
| Step 0 | seuraust3 seuraus highest = haitta (i någon form) | 0 ingen händelse eller ei haittaa<br>1 haitta (i någon form) | 12075<br>400                      |
|        | Overall Percentage                                |                                                              |                                   |

Classification Table<sup>a,b</sup>

|        |                                                   |                                                              |                              |
|--------|---------------------------------------------------|--------------------------------------------------------------|------------------------------|
|        |                                                   |                                                              | Predicted                    |
|        |                                                   |                                                              | seuraust3 seuraus highest .. |
|        |                                                   |                                                              | 1 haitta (i någon form)      |
| Step 0 | seuraust3 seuraus highest = haitta (i någon form) | 0 ingen händelse eller ei haittaa<br>1 haitta (i någon form) | 0<br>0                       |
|        | Overall Percentage                                |                                                              |                              |

Classification Table<sup>a,b</sup>

|        |                                                   |                                                              |                    |
|--------|---------------------------------------------------|--------------------------------------------------------------|--------------------|
|        |                                                   |                                                              | Predicted          |
|        |                                                   |                                                              |                    |
|        |                                                   |                                                              | Percentage Correct |
| Step 0 | seuraust3 seuraus highest = haitta (i någon form) | 0 ingen händelse eller ei haittaa<br>1 haitta (i någon form) | 100,0<br>,0        |
|        | Overall Percentage                                |                                                              | 96,8               |

a. Constant is included in the model.

b. The cut value is ,500

## Variables in the Equation

|                 | B      | S.E. | Wald     | df | Sig. | Exp(B) |
|-----------------|--------|------|----------|----|------|--------|
| Step 0 Constant | -3,407 | ,051 | 4495,313 | 1  | ,000 | ,033   |

## Variables not in the Equation

|                  | Score   | df | Sig. |
|------------------|---------|----|------|
| Step 0 Variables |         |    |      |
| bv1              | 15,180  | 2  | ,001 |
| bv1(1)           | 13,218  | 1  | ,000 |
| bv1(2)           | 7,430   | 1  | ,006 |
| VASTY2           | 321,056 | 35 | ,000 |
| VASTY2(1)        | 1,769   | 1  | ,184 |
| VASTY2(2)        | 27,206  | 1  | ,000 |
| VASTY2(3)        | 8,562   | 1  | ,003 |
| VASTY2(4)        | ,988    | 1  | ,320 |
| VASTY2(5)        | ,587    | 1  | ,444 |
| VASTY2(6)        | 8,528   | 1  | ,003 |
| VASTY2(7)        | 2,666   | 1  | ,103 |
| VASTY2(8)        | ,008    | 1  | ,929 |
| VASTY2(9)        | 19,221  | 1  | ,000 |
| VASTY2(10)       | 58,192  | 1  | ,000 |
| VASTY2(11)       | 21,278  | 1  | ,000 |
| VASTY2(12)       | 2,551   | 1  | ,110 |
| VASTY2(13)       | 62,883  | 1  | ,000 |
| VASTY2(14)       | ,045    | 1  | ,832 |
| VASTY2(15)       | 8,562   | 1  | ,003 |
| VASTY2(16)       | 1,322   | 1  | ,250 |
| VASTY2(17)       | 2,012   | 1  | ,156 |
| VASTY2(18)       | 6,791   | 1  | ,009 |
| VASTY2(19)       | 10,418  | 1  | ,001 |
| VASTY2(20)       | ,662    | 1  | ,416 |
| VASTY2(21)       | 8,562   | 1  | ,003 |
| VASTY2(22)       | 5,396   | 1  | ,020 |
| VASTY2(23)       | ,045    | 1  | ,832 |
| VASTY2(24)       | 5,427   | 1  | ,020 |
| VASTY2(25)       | 6,092   | 1  | ,014 |
| VASTY2(26)       | 7,868   | 1  | ,005 |
| VASTY2(27)       | 5,427   | 1  | ,020 |
| VASTY2(28)       | ,715    | 1  | ,398 |
| VASTY2(29)       | 2,983   | 1  | ,084 |
| VASTY2(30)       | 2,034   | 1  | ,154 |
| VASTY2(31)       | 30,255  | 1  | ,000 |
| VASTY2(32)       | 1,902   | 1  | ,168 |
| VASTY2(33)       | 1,968   | 1  | ,161 |
| VASTY2(34)       | 6,856   | 1  | ,009 |
| VASTY2(35)       | ,127    | 1  | ,722 |

**Variables not in the Equation**

|                    | Score   | df | Sig. |
|--------------------|---------|----|------|
| weekday            | 12,260  | 6  | ,056 |
| weekday(1)         | 2,946   | 1  | ,086 |
| weekday(2)         | ,062    | 1  | ,804 |
| weekday(3)         | ,254    | 1  | ,615 |
| weekday(4)         | 2,864   | 1  | ,091 |
| weekday(5)         | ,463    | 1  | ,496 |
| weekday(6)         | 7,621   | 1  | ,006 |
| holiday(1)         | 1,875   | 1  | ,171 |
| season             | 11,711  | 4  | ,020 |
| season(1)          | ,494    | 1  | ,482 |
| season(2)          | ,040    | 1  | ,842 |
| season(3)          | 3,188   | 1  | ,074 |
| season(4)          | 8,641   | 1  | ,003 |
| Overall Statistics | 350,997 | 48 | ,000 |

**Block 1: Method = Enter**

**Omnibus Tests of Model Coefficients**

|             | Chi-square | df | Sig. |
|-------------|------------|----|------|
| Step 1 Step | 327,914    | 48 | ,000 |
| Block       | 327,914    | 48 | ,000 |
| Model       | 327,914    | 48 | ,000 |

**Model Summary**

| Step | -2 Log likelihood     | Cox & Snell R Square | Nagelkerke R Square |
|------|-----------------------|----------------------|---------------------|
| 1    | 3211,135 <sup>a</sup> | ,026                 | ,105                |

a. Estimation terminated at iteration number 9 because parameter estimates changed by less than ,001.

**Classification Table<sup>a</sup>**

| Observed           |                                                   |                                                              |
|--------------------|---------------------------------------------------|--------------------------------------------------------------|
| Step 1             | seuraust3 seuraus highest = haitta (i någon form) | 0 ingen händelse eller ei haittaa<br>1 haitta (i någon form) |
| Overall Percentage |                                                   |                                                              |

Classification Table<sup>a</sup>

|                    |                                                    | Predicted                         |                                   |
|--------------------|----------------------------------------------------|-----------------------------------|-----------------------------------|
| Observed           |                                                    | seurauslt3 seuraus highest        | 0 ingen händelse eller ei haittaa |
| Step 1             | seurauslt3 seuraus highest = haitta (i någon form) | 0 ingen händelse eller ei haittaa | 12075                             |
|                    |                                                    | 1 haitta (i någon form)           | 400                               |
| Overall Percentage |                                                    |                                   |                                   |

Classification Table<sup>a</sup>

|                    |                                                    | Predicted                         |                         |
|--------------------|----------------------------------------------------|-----------------------------------|-------------------------|
| Observed           |                                                    | seurauslt3 seuraus highest ..     | 1 haitta (i någon form) |
| Step 1             | seurauslt3 seuraus highest = haitta (i någon form) | 0 ingen händelse eller ei haittaa | 0                       |
|                    |                                                    | 1 haitta (i någon form)           | 0                       |
| Overall Percentage |                                                    |                                   |                         |

Classification Table<sup>a</sup>

|                    |                                                    | Predicted                         |       |
|--------------------|----------------------------------------------------|-----------------------------------|-------|
| Observed           |                                                    | Percentage Correct                |       |
| Step 1             | seurauslt3 seuraus highest = haitta (i någon form) | 0 ingen händelse eller ei haittaa | 100,0 |
|                    |                                                    | 1 haitta (i någon form)           | ,0    |
| Overall Percentage |                                                    |                                   | 96,8  |

a. The cut value is ,500

Variables in the Equation

|                         | B      | S.E.  | Wald    | df | Sig. | Exp(B) |
|-------------------------|--------|-------|---------|----|------|--------|
| Step 1 <sup>a</sup> bv1 |        |       | 2,915   | 2  | ,233 |        |
| bv1(1)                  | -,164  | ,149  | 1,207   | 1  | ,272 | ,849   |
| bv1(2)                  | ,107   | ,121  | ,784    | 1  | ,376 | 1,113  |
| VASTY2                  |        |       | 227,323 | 35 | ,000 |        |
| VASTY2(1)               | ,601   | ,424  | 2,008   | 1  | ,156 | 1,824  |
| VASTY2(2)               | 1,205  | ,390  | 9,552   | 1  | ,002 | 3,337  |
| VASTY2(3)               | -1,621 | ,788  | 4,230   | 1  | ,040 | ,198   |
| VASTY2(4)               | ,455   | ,432  | 1,113   | 1  | ,292 | 1,577  |
| VASTY2(5)               | ,451   | ,442  | 1,041   | 1  | ,308 | 1,569  |
| VASTY2(6)               | -1,580 | ,787  | 4,035   | 1  | ,045 | ,206   |
| VASTY2(7)               | ,569   | ,426  | 1,786   | 1  | ,181 | 1,767  |
| VASTY2(8)               | ,249   | ,449  | ,308    | 1  | ,579 | 1,283  |
| VASTY2(9)               | 1,093  | ,398  | 7,532   | 1  | ,006 | 2,984  |
| VASTY2(10)              | 1,458  | ,381  | 14,666  | 1  | ,000 | 4,299  |
| VASTY2(11)              | 1,130  | ,393  | 8,254   | 1  | ,004 | 3,096  |
| VASTY2(12)              | ,613   | ,420  | 2,129   | 1  | ,145 | 1,847  |
| VASTY2(13)              | 1,441  | ,383  | 14,149  | 1  | ,000 | 4,225  |
| VASTY2(14)              | ,158   | ,457  | ,120    | 1  | ,729 | 1,172  |
| VASTY2(15)              | -1,566 | ,786  | 3,969   | 1  | ,046 | ,209   |
| VASTY2(16)              | -,502  | ,675  | ,554    | 1  | ,457 | ,605   |
| VASTY2(17)              | -,252  | ,510  | ,244    | 1  | ,621 | ,777   |
| VASTY2(18)              | -1,113 | ,672  | 2,749   | 1  | ,097 | ,328   |
| VASTY2(19)              | -2,106 | 1,061 | 3,942   | 1  | ,047 | ,122   |
| VASTY2(20)              | ,428   | ,451  | ,902    | 1  | ,342 | 1,534  |
| VASTY2(21)              | -1,553 | ,786  | 3,904   | 1  | ,048 | ,212   |
| VASTY2(22)              | -,777  | ,607  | 1,642   | 1  | ,200 | ,460   |
| VASTY2(23)              | ,199   | ,456  | ,190    | 1  | ,663 | 1,220  |
| VASTY2(24)              | -,915  | ,608  | 2,270   | 1  | ,132 | ,400   |
| VASTY2(25)              | -1,333 | ,786  | 2,877   | 1  | ,090 | ,264   |
| VASTY2(26)              | -2,073 | 1,058 | 3,840   | 1  | ,050 | ,126   |
| VASTY2(27)              | -,897  | ,607  | 2,182   | 1  | ,140 | ,408   |
| VASTY2(28)              | -,168  | ,567  | ,088    | 1  | ,767 | ,846   |
| VASTY2(29)              | -,470  | ,533  | ,778    | 1  | ,378 | ,625   |
| VASTY2(30)              | -,305  | ,510  | ,358    | 1  | ,550 | ,737   |
| VASTY2(31)              | 1,234  | ,390  | 10,020  | 1  | ,002 | 3,437  |
| VASTY2(32)              | -,242  | ,511  | ,224    | 1  | ,636 | ,785   |
| VASTY2(33)              | -,264  | ,511  | ,267    | 1  | ,605 | ,768   |
| VASTY2(34)              | -1,152 | ,671  | 2,946   | 1  | ,086 | ,316   |
| VASTY2(35)              | ,052   | ,482  | ,012    | 1  | ,913 | 1,054  |
| weekday                 |        |       | 12,250  | 6  | ,057 |        |
| weekday(1)              | ,221   | ,185  | 1,422   | 1  | ,233 | 1,247  |
| weekday(2)              | -,015  | ,195  | ,006    | 1  | ,940 | ,986   |

## Variables in the Equation

|                     |            | 95% C.I. for EXP(B) |       |
|---------------------|------------|---------------------|-------|
|                     |            | Lower               | Upper |
| Step 1 <sup>a</sup> | bv1        |                     |       |
|                     | bv1(1)     | ,633                | 1,137 |
|                     | bv1(2)     | ,878                | 1,411 |
|                     | VASTY2     |                     |       |
|                     | VASTY2(1)  | ,794                | 4,188 |
|                     | VASTY2(2)  | 1,554               | 7,166 |
|                     | VASTY2(3)  | ,042                | ,927  |
|                     | VASTY2(4)  | ,677                | 3,674 |
|                     | VASTY2(5)  | ,660                | 3,731 |
|                     | VASTY2(6)  | ,044                | ,962  |
|                     | VASTY2(7)  | ,767                | 4,069 |
|                     | VASTY2(8)  | ,532                | 3,090 |
|                     | VASTY2(9)  | 1,367               | 6,515 |
|                     | VASTY2(10) | 2,038               | 9,070 |
|                     | VASTY2(11) | 1,432               | 6,694 |
|                     | VASTY2(12) | ,810                | 4,211 |
|                     | VASTY2(13) | 1,994               | 8,952 |
|                     | VASTY2(14) | ,478                | 2,872 |
|                     | VASTY2(15) | ,045                | ,975  |
|                     | VASTY2(16) | ,161                | 2,272 |
|                     | VASTY2(17) | ,286                | 2,113 |
|                     | VASTY2(18) | ,088                | 1,225 |
|                     | VASTY2(19) | ,015                | ,973  |
|                     | VASTY2(20) | ,634                | 3,712 |
|                     | VASTY2(21) | ,045                | ,988  |
|                     | VASTY2(22) | ,140                | 1,509 |
|                     | VASTY2(23) | ,499                | 2,984 |
|                     | VASTY2(24) | ,122                | 1,317 |
|                     | VASTY2(25) | ,056                | 1,231 |
|                     | VASTY2(26) | ,016                | 1,000 |
|                     | VASTY2(27) | ,124                | 1,341 |
|                     | VASTY2(28) | ,278                | 2,569 |
|                     | VASTY2(29) | ,220                | 1,777 |
|                     | VASTY2(30) | ,271                | 2,004 |
|                     | VASTY2(31) | 1,600               | 7,380 |
|                     | VASTY2(32) | ,288                | 2,138 |
|                     | VASTY2(33) | ,282                | 2,090 |
|                     | VASTY2(34) | ,085                | 1,178 |
|                     | VASTY2(35) | ,410                | 2,710 |
|                     | weekday    |                     |       |
|                     | weekday(1) | ,867                | 1,794 |
|                     | weekday(2) | ,673                | 1,444 |



## Variables in the Equation

|            | B      | S.E. | Wald   | df | Sig. | Exp(B) |
|------------|--------|------|--------|----|------|--------|
| weekday(3) | ,081   | ,191 | ,178   | 1  | ,673 | 1,084  |
| weekday(4) | ,240   | ,186 | 1,669  | 1  | ,196 | 1,272  |
| weekday(5) | -,051  | ,200 | ,064   | 1  | ,800 | ,951   |
| weekday(6) | -,400  | ,217 | 3,386  | 1  | ,066 | ,670   |
| holiday(1) | -,468  | ,372 | 1,579  | 1  | ,209 | ,626   |
| season     |        |      | 10,214 | 4  | ,037 |        |
| season(1)  | -,203  | ,162 | 1,567  | 1  | ,211 | ,816   |
| season(2)  | -,082  | ,146 | ,313   | 1  | ,576 | ,921   |
| season(3)  | ,073   | ,151 | ,235   | 1  | ,628 | 1,076  |
| season(4)  | -,482  | ,181 | 7,122  | 1  | ,008 | ,617   |
| Constant   | -3,548 | ,373 | 90,257 | 1  | ,000 | ,029   |

## Variables in the Equation

|            | 95% C.I. for EXP(B) |       |
|------------|---------------------|-------|
|            | Lower               | Upper |
| weekday(3) | ,745                | 1,576 |
| weekday(4) | ,883                | 1,831 |
| weekday(5) | ,643                | 1,406 |
| weekday(6) | ,438                | 1,026 |
| holiday(1) | ,302                | 1,299 |
| season     |                     |       |
| season(1)  | ,594                | 1,122 |
| season(2)  | ,692                | 1,227 |
| season(3)  | ,801                | 1,445 |
| season(4)  | ,433                | ,880  |
| Constant   |                     |       |

a. Variable(s) entered on step 1: bv1, VASTY2, weekday, holiday, season.

```
LOGISTIC REGRESSION VARIABLES seurauslt3
/METHOD=ENTER bv2 VASTY2 weekday holiday season
/CONTRAST (bv2)=Indicator(1)
/CONTRAST (VASTY2)=Indicator(1)
/CONTRAST (weekday)=Indicator(1)
/CONTRAST (holiday)=Indicator(1)
/CONTRAST (season)=Indicator(1)
/PRINT=CI(95)
/CRITERIA=PIN(0.05) POUT(0.10) ITERATE(20) CUT(0.5).
```

## Logistic Regression

[DataSet6] C:\cWordjan\Rafaela\_VCS\alla\_tillsammans\abo\_bjo\_vasa\_v1.sav

**Case Processing Summary**

| Unweighted Cases <sup>a</sup> |                      | N     | Percent |
|-------------------------------|----------------------|-------|---------|
| Selected Cases                | Included in Analysis | 12475 | 100,0   |
|                               | Missing Cases        | 0     | ,0      |
|                               | Total                | 12475 | 100,0   |
| Unselected Cases              |                      | 0     | ,0      |
| Total                         |                      | 12475 | 100,0   |

a. If weight is in effect, see classification table for the total number of cases.

**Dependent Variable Encoding**

| Original Value                    | Internal Value |
|-----------------------------------|----------------|
| 0 ingen händelse eller ei haittaa | 0              |
| 1 haitta (i någon form)           | 1              |

**Categorical Variables Codings**

|                           | Frequency |
|---------------------------|-----------|
| VASTY2 (SAIR*10000)+VASTY | 365       |
| 403073101                 | 362       |
| 403073102                 | 365       |
| 403073103                 | 365       |
| 403073202                 | 365       |
| 403073203                 | 330       |
| 403073204                 | 364       |
| 403073303                 | 362       |
| 403073651                 | 365       |
| 403073771                 | 341       |
| 403133102                 | 365       |
| 403133106                 | 365       |
| 403133107                 | 365       |
| 403133109                 | 365       |
| 403133202                 | 365       |
| 403133203                 | 365       |
| 403133204                 | 365       |
| 403133315                 | 177       |
| 403133322                 | 365       |
| 403133401                 | 362       |
| 403133402                 | 365       |
| 403133550                 | 298       |
| 403133772                 | 365       |
| 403135803                 | 365       |
| 404060001                 | 365       |
| 404060002                 | 366       |
| 404310003                 | 291       |
| 404310004                 | 291       |

## Categorical Variables Codings

|                           |           | Parameter |
|---------------------------|-----------|-----------|
|                           |           | (1)       |
| VASTY2 (SAIR*10000)+VASTY | 403073101 | ,000      |
|                           | 403073102 | 1,000     |
|                           | 403073103 | ,000      |
|                           | 403073202 | ,000      |
|                           | 403073203 | ,000      |
|                           | 403073204 | ,000      |
|                           | 403073303 | ,000      |
|                           | 403073651 | ,000      |
|                           | 403073771 | ,000      |
|                           | 403133102 | ,000      |
|                           | 403133106 | ,000      |
|                           | 403133107 | ,000      |
|                           | 403133109 | ,000      |
|                           | 403133202 | ,000      |
|                           | 403133203 | ,000      |
|                           | 403133204 | ,000      |
|                           | 403133315 | ,000      |
|                           | 403133322 | ,000      |
|                           | 403133401 | ,000      |
|                           | 403133402 | ,000      |
|                           | 403133550 | ,000      |
|                           | 403133772 | ,000      |
|                           | 403135803 | ,000      |
|                           | 404060001 | ,000      |
|                           | 404060002 | ,000      |
|                           | 404310003 | ,000      |
|                           | 404310004 | ,000      |

## Categorical Variables Codings

|                           |           | Parameter |
|---------------------------|-----------|-----------|
|                           |           | (2)       |
| VASTY2 (SAIR*10000)+VASTY | 403073101 | ,000      |
|                           | 403073102 | ,000      |
|                           | 403073103 | 1,000     |
|                           | 403073202 | ,000      |
|                           | 403073203 | ,000      |
|                           | 403073204 | ,000      |
|                           | 403073303 | ,000      |
|                           | 403073651 | ,000      |
|                           | 403073771 | ,000      |
|                           | 403133102 | ,000      |
|                           | 403133106 | ,000      |
|                           | 403133107 | ,000      |
|                           | 403133109 | ,000      |
|                           | 403133202 | ,000      |
|                           | 403133203 | ,000      |
|                           | 403133204 | ,000      |
|                           | 403133315 | ,000      |
|                           | 403133322 | ,000      |
|                           | 403133401 | ,000      |
|                           | 403133402 | ,000      |
|                           | 403133550 | ,000      |
|                           | 403133772 | ,000      |
|                           | 403135803 | ,000      |
|                           | 404060001 | ,000      |
|                           | 404060002 | ,000      |
|                           | 404310003 | ,000      |
|                           | 404310004 | ,000      |

1  
2  
3  
4  
5  
6  
7  
8  
9  
10  
11  
12  
13  
14  
15  
16  
17  
18  
19  
20  
21  
22  
23  
24  
25  
26  
27  
28  
29  
30  
31  
32  
33  
34  
35  
36  
37  
38  
39  
40  
41  
42  
43  
44  
45  
46  
47  
48  
49  
50  
51  
52  
53  
54  
55  
56  
57  
58  
59  
60

**Categorical Variables Codings**

|                           |           | Parameter |
|---------------------------|-----------|-----------|
|                           |           | (3)       |
| VASTY2 (SAIR*10000)+VASTY | 403073101 | ,000      |
|                           | 403073102 | ,000      |
|                           | 403073103 | ,000      |
|                           | 403073202 | 1,000     |
|                           | 403073203 | ,000      |
|                           | 403073204 | ,000      |
|                           | 403073303 | ,000      |
|                           | 403073651 | ,000      |
|                           | 403073771 | ,000      |
|                           | 403133102 | ,000      |
|                           | 403133106 | ,000      |
|                           | 403133107 | ,000      |
|                           | 403133109 | ,000      |
|                           | 403133202 | ,000      |
|                           | 403133203 | ,000      |
|                           | 403133204 | ,000      |
|                           | 403133315 | ,000      |
|                           | 403133322 | ,000      |
|                           | 403133401 | ,000      |
|                           | 403133402 | ,000      |
|                           | 403133550 | ,000      |
|                           | 403133772 | ,000      |
|                           | 403135803 | ,000      |
|                           | 404060001 | ,000      |
|                           | 404060002 | ,000      |
|                           | 404310003 | ,000      |
|                           | 404310004 | ,000      |

BMJ

## Categorical Variables Codings

|                           |           | Parameter |
|---------------------------|-----------|-----------|
|                           |           | (4)       |
| VASTY2 (SAIR*10000)+VASTY | 403073101 | ,000      |
|                           | 403073102 | ,000      |
|                           | 403073103 | ,000      |
|                           | 403073202 | ,000      |
|                           | 403073203 | 1,000     |
|                           | 403073204 | ,000      |
|                           | 403073303 | ,000      |
|                           | 403073651 | ,000      |
|                           | 403073771 | ,000      |
|                           | 403133102 | ,000      |
|                           | 403133106 | ,000      |
|                           | 403133107 | ,000      |
|                           | 403133109 | ,000      |
|                           | 403133202 | ,000      |
|                           | 403133203 | ,000      |
|                           | 403133204 | ,000      |
|                           | 403133315 | ,000      |
|                           | 403133322 | ,000      |
|                           | 403133401 | ,000      |
|                           | 403133402 | ,000      |
|                           | 403133550 | ,000      |
|                           | 403133772 | ,000      |
|                           | 403135803 | ,000      |
|                           | 404060001 | ,000      |
|                           | 404060002 | ,000      |
|                           | 404310003 | ,000      |
|                           | 404310004 | ,000      |

## Categorical Variables Codings

|                           |           | Parameter |
|---------------------------|-----------|-----------|
|                           |           | (5)       |
| VASTY2 (SAIR*10000)+VASTY | 403073101 | ,000      |
|                           | 403073102 | ,000      |
|                           | 403073103 | ,000      |
|                           | 403073202 | ,000      |
|                           | 403073203 | ,000      |
|                           | 403073204 | 1,000     |
|                           | 403073303 | ,000      |
|                           | 403073651 | ,000      |
|                           | 403073771 | ,000      |
|                           | 403133102 | ,000      |
|                           | 403133106 | ,000      |
|                           | 403133107 | ,000      |
|                           | 403133109 | ,000      |
|                           | 403133202 | ,000      |
|                           | 403133203 | ,000      |
|                           | 403133204 | ,000      |
|                           | 403133315 | ,000      |
|                           | 403133322 | ,000      |
|                           | 403133401 | ,000      |
|                           | 403133402 | ,000      |
|                           | 403133550 | ,000      |
|                           | 403133772 | ,000      |
|                           | 403135803 | ,000      |
|                           | 404060001 | ,000      |
|                           | 404060002 | ,000      |
|                           | 404310003 | ,000      |
|                           | 404310004 | ,000      |

## Categorical Variables Codings

|                           |           | Parameter |
|---------------------------|-----------|-----------|
|                           |           | (6)       |
| VASTY2 (SAIR*10000)+VASTY | 403073101 | ,000      |
|                           | 403073102 | ,000      |
|                           | 403073103 | ,000      |
|                           | 403073202 | ,000      |
|                           | 403073203 | ,000      |
|                           | 403073204 | ,000      |
|                           | 403073303 | 1,000     |
|                           | 403073651 | ,000      |
|                           | 403073771 | ,000      |
|                           | 403133102 | ,000      |
|                           | 403133106 | ,000      |
|                           | 403133107 | ,000      |
|                           | 403133109 | ,000      |
|                           | 403133202 | ,000      |
|                           | 403133203 | ,000      |
|                           | 403133204 | ,000      |
|                           | 403133315 | ,000      |
|                           | 403133322 | ,000      |
|                           | 403133401 | ,000      |
|                           | 403133402 | ,000      |
|                           | 403133550 | ,000      |
|                           | 403133772 | ,000      |
|                           | 403135803 | ,000      |
|                           | 404060001 | ,000      |
|                           | 404060002 | ,000      |
|                           | 404310003 | ,000      |
|                           | 404310004 | ,000      |



## Categorical Variables Codings

|                           |           | Parameter |
|---------------------------|-----------|-----------|
|                           |           | (7)       |
| VASTY2 (SAIR*10000)+VASTY | 403073101 | ,000      |
|                           | 403073102 | ,000      |
|                           | 403073103 | ,000      |
|                           | 403073202 | ,000      |
|                           | 403073203 | ,000      |
|                           | 403073204 | ,000      |
|                           | 403073303 | ,000      |
|                           | 403073651 | 1,000     |
|                           | 403073771 | ,000      |
|                           | 403133102 | ,000      |
|                           | 403133106 | ,000      |
|                           | 403133107 | ,000      |
|                           | 403133109 | ,000      |
|                           | 403133202 | ,000      |
|                           | 403133203 | ,000      |
|                           | 403133204 | ,000      |
|                           | 403133315 | ,000      |
|                           | 403133322 | ,000      |
|                           | 403133401 | ,000      |
|                           | 403133402 | ,000      |
|                           | 403133550 | ,000      |
|                           | 403133772 | ,000      |
|                           | 403135803 | ,000      |
|                           | 404060001 | ,000      |
|                           | 404060002 | ,000      |
|                           | 404310003 | ,000      |
|                           | 404310004 | ,000      |

## Categorical Variables Codings

|                           |           | Parameter |
|---------------------------|-----------|-----------|
|                           |           | (8)       |
| VASTY2 (SAIR*10000)+VASTY | 403073101 | ,000      |
|                           | 403073102 | ,000      |
|                           | 403073103 | ,000      |
|                           | 403073202 | ,000      |
|                           | 403073203 | ,000      |
|                           | 403073204 | ,000      |
|                           | 403073303 | ,000      |
|                           | 403073651 | ,000      |
|                           | 403073771 | 1,000     |
|                           | 403133102 | ,000      |
|                           | 403133106 | ,000      |
|                           | 403133107 | ,000      |
|                           | 403133109 | ,000      |
|                           | 403133202 | ,000      |
|                           | 403133203 | ,000      |
|                           | 403133204 | ,000      |
|                           | 403133315 | ,000      |
|                           | 403133322 | ,000      |
|                           | 403133401 | ,000      |
|                           | 403133402 | ,000      |
|                           | 403133550 | ,000      |
|                           | 403133772 | ,000      |
|                           | 403135803 | ,000      |
|                           | 404060001 | ,000      |
|                           | 404060002 | ,000      |
|                           | 404310003 | ,000      |
|                           | 404310004 | ,000      |

1  
2  
3  
4  
5  
6  
7  
8  
9  
10  
11  
12  
13  
14  
15  
16  
17  
18  
19  
20  
21  
22  
23  
24  
25  
26  
27  
28  
29  
30  
31  
32  
33  
34  
35  
36  
37  
38  
39  
40  
41  
42  
43  
44  
45  
46  
47  
48  
49  
50  
51  
52  
53  
54  
55  
56  
57  
58  
59  
60

**Categorical Variables Codings**

|                           |           | Parameter |
|---------------------------|-----------|-----------|
|                           |           | (9)       |
| VASTY2 (SAIR*10000)+VASTY | 403073101 | ,000      |
|                           | 403073102 | ,000      |
|                           | 403073103 | ,000      |
|                           | 403073202 | ,000      |
|                           | 403073203 | ,000      |
|                           | 403073204 | ,000      |
|                           | 403073303 | ,000      |
|                           | 403073651 | ,000      |
|                           | 403073771 | ,000      |
|                           | 403133102 | 1,000     |
|                           | 403133106 | ,000      |
|                           | 403133107 | ,000      |
|                           | 403133109 | ,000      |
|                           | 403133202 | ,000      |
|                           | 403133203 | ,000      |
|                           | 403133204 | ,000      |
|                           | 403133315 | ,000      |
|                           | 403133322 | ,000      |
|                           | 403133401 | ,000      |
|                           | 403133402 | ,000      |
|                           | 403133550 | ,000      |
|                           | 403133772 | ,000      |
|                           | 403135803 | ,000      |
|                           | 404060001 | ,000      |
|                           | 404060002 | ,000      |
|                           | 404310003 | ,000      |
|                           | 404310004 | ,000      |

BMJ

## Categorical Variables Codings

|                           |           | Parameter |
|---------------------------|-----------|-----------|
|                           |           | (10)      |
| VASTY2 (SAIR*10000)+VASTY | 403073101 | ,000      |
|                           | 403073102 | ,000      |
|                           | 403073103 | ,000      |
|                           | 403073202 | ,000      |
|                           | 403073203 | ,000      |
|                           | 403073204 | ,000      |
|                           | 403073303 | ,000      |
|                           | 403073651 | ,000      |
|                           | 403073771 | ,000      |
|                           | 403133102 | ,000      |
|                           | 403133106 | 1,000     |
|                           | 403133107 | ,000      |
|                           | 403133109 | ,000      |
|                           | 403133202 | ,000      |
|                           | 403133203 | ,000      |
|                           | 403133204 | ,000      |
|                           | 403133315 | ,000      |
|                           | 403133322 | ,000      |
|                           | 403133401 | ,000      |
|                           | 403133402 | ,000      |
|                           | 403133550 | ,000      |
|                           | 403133772 | ,000      |
|                           | 403135803 | ,000      |
|                           | 404060001 | ,000      |
|                           | 404060002 | ,000      |
|                           | 404310003 | ,000      |
|                           | 404310004 | ,000      |

1  
2  
3  
4  
5  
6  
7  
8  
9  
10  
11  
12  
13  
14  
15  
16  
17  
18  
19  
20  
21  
22  
23  
24  
25  
26  
27  
28  
29  
30  
31  
32  
33  
34  
35  
36  
37  
38  
39  
40  
41  
42  
43  
44  
45  
46  
47  
48  
49  
50  
51  
52  
53  
54  
55  
56  
57  
58  
59  
60

**Categorical Variables Codings**

|                           |           | Parameter |
|---------------------------|-----------|-----------|
|                           |           | (1)       |
| VASTY2 (SAIR*10000)+VASTY | 403073101 | ,000      |
|                           | 403073102 | ,000      |
|                           | 403073103 | ,000      |
|                           | 403073202 | ,000      |
|                           | 403073203 | ,000      |
|                           | 403073204 | ,000      |
|                           | 403073303 | ,000      |
|                           | 403073651 | ,000      |
|                           | 403073771 | ,000      |
|                           | 403133102 | ,000      |
|                           | 403133106 | ,000      |
|                           | 403133107 | 1,000     |
|                           | 403133109 | ,000      |
|                           | 403133202 | ,000      |
|                           | 403133203 | ,000      |
|                           | 403133204 | ,000      |
|                           | 403133315 | ,000      |
|                           | 403133322 | ,000      |
|                           | 403133401 | ,000      |
|                           | 403133402 | ,000      |
|                           | 403133550 | ,000      |
|                           | 403133772 | ,000      |
|                           | 403135803 | ,000      |
|                           | 404060001 | ,000      |
|                           | 404060002 | ,000      |
|                           | 404310003 | ,000      |
|                           | 404310004 | ,000      |

BMJ

## Categorical Variables Codings

|                           |           | Parameter |
|---------------------------|-----------|-----------|
|                           |           | (12)      |
| VASTY2 (SAIR*10000)+VASTY | 403073101 | ,000      |
|                           | 403073102 | ,000      |
|                           | 403073103 | ,000      |
|                           | 403073202 | ,000      |
|                           | 403073203 | ,000      |
|                           | 403073204 | ,000      |
|                           | 403073303 | ,000      |
|                           | 403073651 | ,000      |
|                           | 403073771 | ,000      |
|                           | 403133102 | ,000      |
|                           | 403133106 | ,000      |
|                           | 403133107 | ,000      |
|                           | 403133109 | 1,000     |
|                           | 403133202 | ,000      |
|                           | 403133203 | ,000      |
|                           | 403133204 | ,000      |
|                           | 403133315 | ,000      |
|                           | 403133322 | ,000      |
|                           | 403133401 | ,000      |
|                           | 403133402 | ,000      |
|                           | 403133550 | ,000      |
|                           | 403133772 | ,000      |
|                           | 403135803 | ,000      |
|                           | 404060001 | ,000      |
|                           | 404060002 | ,000      |
|                           | 404310003 | ,000      |
|                           | 404310004 | ,000      |

## Categorical Variables Codings

|                           |           | Parameter |
|---------------------------|-----------|-----------|
|                           |           | (13)      |
| VASTY2 (SAIR*10000)+VASTY | 403073101 | ,000      |
|                           | 403073102 | ,000      |
|                           | 403073103 | ,000      |
|                           | 403073202 | ,000      |
|                           | 403073203 | ,000      |
|                           | 403073204 | ,000      |
|                           | 403073303 | ,000      |
|                           | 403073651 | ,000      |
|                           | 403073771 | ,000      |
|                           | 403133102 | ,000      |
|                           | 403133106 | ,000      |
|                           | 403133107 | ,000      |
|                           | 403133109 | ,000      |
|                           | 403133202 | 1,000     |
|                           | 403133203 | ,000      |
|                           | 403133204 | ,000      |
|                           | 403133315 | ,000      |
|                           | 403133322 | ,000      |
|                           | 403133401 | ,000      |
|                           | 403133402 | ,000      |
|                           | 403133550 | ,000      |
|                           | 403133772 | ,000      |
|                           | 403135803 | ,000      |
|                           | 404060001 | ,000      |
|                           | 404060002 | ,000      |
|                           | 404310003 | ,000      |
|                           | 404310004 | ,000      |

## Categorical Variables Codings

|                           |           | Parameter |
|---------------------------|-----------|-----------|
|                           |           | (14)      |
| VASTY2 (SAIR*10000)+VASTY | 403073101 | ,000      |
|                           | 403073102 | ,000      |
|                           | 403073103 | ,000      |
|                           | 403073202 | ,000      |
|                           | 403073203 | ,000      |
|                           | 403073204 | ,000      |
|                           | 403073303 | ,000      |
|                           | 403073651 | ,000      |
|                           | 403073771 | ,000      |
|                           | 403133102 | ,000      |
|                           | 403133106 | ,000      |
|                           | 403133107 | ,000      |
|                           | 403133109 | ,000      |
|                           | 403133202 | ,000      |
|                           | 403133203 | 1,000     |
|                           | 403133204 | ,000      |
|                           | 403133315 | ,000      |
|                           | 403133322 | ,000      |
|                           | 403133401 | ,000      |
|                           | 403133402 | ,000      |
|                           | 403133550 | ,000      |
|                           | 403133772 | ,000      |
|                           | 403135803 | ,000      |
|                           | 404060001 | ,000      |
|                           | 404060002 | ,000      |
|                           | 404310003 | ,000      |
|                           | 404310004 | ,000      |



**Categorical Variables Codings**

|                           |           | Parameter |
|---------------------------|-----------|-----------|
|                           |           | (15)      |
| VASTY2 (SAIR*10000)+VASTY | 403073101 | ,000      |
|                           | 403073102 | ,000      |
|                           | 403073103 | ,000      |
|                           | 403073202 | ,000      |
|                           | 403073203 | ,000      |
|                           | 403073204 | ,000      |
|                           | 403073303 | ,000      |
|                           | 403073651 | ,000      |
|                           | 403073771 | ,000      |
|                           | 403133102 | ,000      |
|                           | 403133106 | ,000      |
|                           | 403133107 | ,000      |
|                           | 403133109 | ,000      |
|                           | 403133202 | ,000      |
|                           | 403133203 | ,000      |
|                           | 403133204 | 1,000     |
|                           | 403133315 | ,000      |
|                           | 403133322 | ,000      |
|                           | 403133401 | ,000      |
|                           | 403133402 | ,000      |
|                           | 403133550 | ,000      |
|                           | 403133772 | ,000      |
|                           | 403135803 | ,000      |
|                           | 404060001 | ,000      |
|                           | 404060002 | ,000      |
|                           | 404310003 | ,000      |
|                           | 404310004 | ,000      |

BMJ

## Categorical Variables Codings

|                           |           | Parameter |
|---------------------------|-----------|-----------|
|                           |           | (16)      |
| VASTY2 (SAIR*10000)+VASTY | 403073101 | ,000      |
|                           | 403073102 | ,000      |
|                           | 403073103 | ,000      |
|                           | 403073202 | ,000      |
|                           | 403073203 | ,000      |
|                           | 403073204 | ,000      |
|                           | 403073303 | ,000      |
|                           | 403073651 | ,000      |
|                           | 403073771 | ,000      |
|                           | 403133102 | ,000      |
|                           | 403133106 | ,000      |
|                           | 403133107 | ,000      |
|                           | 403133109 | ,000      |
|                           | 403133202 | ,000      |
|                           | 403133203 | ,000      |
|                           | 403133204 | ,000      |
|                           | 403133315 | 1,000     |
|                           | 403133322 | ,000      |
|                           | 403133401 | ,000      |
|                           | 403133402 | ,000      |
|                           | 403133550 | ,000      |
|                           | 403133772 | ,000      |
|                           | 403135803 | ,000      |
|                           | 404060001 | ,000      |
|                           | 404060002 | ,000      |
|                           | 404310003 | ,000      |
|                           | 404310004 | ,000      |

1  
2  
3  
4  
5  
6  
7  
8  
9  
10  
11  
12  
13  
14  
15  
16  
17  
18  
19  
20  
21  
22  
23  
24  
25  
26  
27  
28  
29  
30  
31  
32  
33  
34  
35  
36  
37  
38  
39  
40  
41  
42  
43  
44  
45  
46  
47  
48  
49  
50  
51  
52  
53  
54  
55  
56  
57  
58  
59  
60

**Categorical Variables Codings**

|                           |           | Parameter |
|---------------------------|-----------|-----------|
|                           |           | (17)      |
| VASTY2 (SAIR*10000)+VASTY | 403073101 | ,000      |
|                           | 403073102 | ,000      |
|                           | 403073103 | ,000      |
|                           | 403073202 | ,000      |
|                           | 403073203 | ,000      |
|                           | 403073204 | ,000      |
|                           | 403073303 | ,000      |
|                           | 403073651 | ,000      |
|                           | 403073771 | ,000      |
|                           | 403133102 | ,000      |
|                           | 403133106 | ,000      |
|                           | 403133107 | ,000      |
|                           | 403133109 | ,000      |
|                           | 403133202 | ,000      |
|                           | 403133203 | ,000      |
|                           | 403133204 | ,000      |
|                           | 403133315 | ,000      |
|                           | 403133322 | 1,000     |
|                           | 403133401 | ,000      |
|                           | 403133402 | ,000      |
|                           | 403133550 | ,000      |
|                           | 403133772 | ,000      |
|                           | 403135803 | ,000      |
|                           | 404060001 | ,000      |
|                           | 404060002 | ,000      |
|                           | 404310003 | ,000      |
|                           | 404310004 | ,000      |

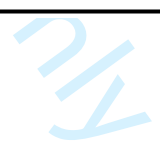

## Categorical Variables Codings

|                           |           | Parameter |
|---------------------------|-----------|-----------|
|                           |           | (18)      |
| VASTY2 (SAIR*10000)+VASTY | 403073101 | ,000      |
|                           | 403073102 | ,000      |
|                           | 403073103 | ,000      |
|                           | 403073202 | ,000      |
|                           | 403073203 | ,000      |
|                           | 403073204 | ,000      |
|                           | 403073303 | ,000      |
|                           | 403073651 | ,000      |
|                           | 403073771 | ,000      |
|                           | 403133102 | ,000      |
|                           | 403133106 | ,000      |
|                           | 403133107 | ,000      |
|                           | 403133109 | ,000      |
|                           | 403133202 | ,000      |
|                           | 403133203 | ,000      |
|                           | 403133204 | ,000      |
|                           | 403133315 | ,000      |
|                           | 403133322 | ,000      |
|                           | 403133401 | 1,000     |
|                           | 403133402 | ,000      |
|                           | 403133550 | ,000      |
|                           | 403133772 | ,000      |
|                           | 403135803 | ,000      |
|                           | 404060001 | ,000      |
|                           | 404060002 | ,000      |
|                           | 404310003 | ,000      |
|                           | 404310004 | ,000      |

1  
2  
3  
4  
5  
6  
7  
8  
9  
10  
11  
12  
13  
14  
15  
16  
17  
18  
19  
20  
21  
22  
23  
24  
25  
26  
27  
28  
29  
30  
31  
32  
33  
34  
35  
36  
37  
38  
39  
40  
41  
42  
43  
44  
45  
46  
47  
48  
49  
50  
51  
52  
53  
54  
55  
56  
57  
58  
59  
60

**Categorical Variables Codings**

|                           |           | Parameter |
|---------------------------|-----------|-----------|
|                           |           | (19)      |
| VASTY2 (SAIR*10000)+VASTY | 403073101 | ,000      |
|                           | 403073102 | ,000      |
|                           | 403073103 | ,000      |
|                           | 403073202 | ,000      |
|                           | 403073203 | ,000      |
|                           | 403073204 | ,000      |
|                           | 403073303 | ,000      |
|                           | 403073651 | ,000      |
|                           | 403073771 | ,000      |
|                           | 403133102 | ,000      |
|                           | 403133106 | ,000      |
|                           | 403133107 | ,000      |
|                           | 403133109 | ,000      |
|                           | 403133202 | ,000      |
|                           | 403133203 | ,000      |
|                           | 403133204 | ,000      |
|                           | 403133315 | ,000      |
|                           | 403133322 | ,000      |
|                           | 403133401 | ,000      |
|                           | 403133402 | 1,000     |
|                           | 403133550 | ,000      |
|                           | 403133772 | ,000      |
|                           | 403135803 | ,000      |
|                           | 404060001 | ,000      |
|                           | 404060002 | ,000      |
|                           | 404310003 | ,000      |
|                           | 404310004 | ,000      |

BMJ

## Categorical Variables Codings

|                           |           | Parameter |
|---------------------------|-----------|-----------|
|                           |           | (20)      |
| VASTY2 (SAIR*10000)+VASTY | 403073101 | ,000      |
|                           | 403073102 | ,000      |
|                           | 403073103 | ,000      |
|                           | 403073202 | ,000      |
|                           | 403073203 | ,000      |
|                           | 403073204 | ,000      |
|                           | 403073303 | ,000      |
|                           | 403073651 | ,000      |
|                           | 403073771 | ,000      |
|                           | 403133102 | ,000      |
|                           | 403133106 | ,000      |
|                           | 403133107 | ,000      |
|                           | 403133109 | ,000      |
|                           | 403133202 | ,000      |
|                           | 403133203 | ,000      |
|                           | 403133204 | ,000      |
|                           | 403133315 | ,000      |
|                           | 403133322 | ,000      |
|                           | 403133401 | ,000      |
|                           | 403133402 | ,000      |
|                           | 403133550 | 1,000     |
|                           | 403133772 | ,000      |
|                           | 403135803 | ,000      |
|                           | 404060001 | ,000      |
|                           | 404060002 | ,000      |
|                           | 404310003 | ,000      |
|                           | 404310004 | ,000      |

## Categorical Variables Codings

|                           |           | Parameter |
|---------------------------|-----------|-----------|
|                           |           | (21)      |
| VASTY2 (SAIR*10000)+VASTY | 403073101 | ,000      |
|                           | 403073102 | ,000      |
|                           | 403073103 | ,000      |
|                           | 403073202 | ,000      |
|                           | 403073203 | ,000      |
|                           | 403073204 | ,000      |
|                           | 403073303 | ,000      |
|                           | 403073651 | ,000      |
|                           | 403073771 | ,000      |
|                           | 403133102 | ,000      |
|                           | 403133106 | ,000      |
|                           | 403133107 | ,000      |
|                           | 403133109 | ,000      |
|                           | 403133202 | ,000      |
|                           | 403133203 | ,000      |
|                           | 403133204 | ,000      |
|                           | 403133315 | ,000      |
|                           | 403133322 | ,000      |
|                           | 403133401 | ,000      |
|                           | 403133402 | ,000      |
|                           | 403133550 | ,000      |
|                           | 403133772 | 1,000     |
|                           | 403135803 | ,000      |
|                           | 404060001 | ,000      |
|                           | 404060002 | ,000      |
|                           | 404310003 | ,000      |
|                           | 404310004 | ,000      |

## Categorical Variables Codings

|                           |           | Parameter |
|---------------------------|-----------|-----------|
|                           |           | (22)      |
| VASTY2 (SAIR*10000)+VASTY | 403073101 | ,000      |
|                           | 403073102 | ,000      |
|                           | 403073103 | ,000      |
|                           | 403073202 | ,000      |
|                           | 403073203 | ,000      |
|                           | 403073204 | ,000      |
|                           | 403073303 | ,000      |
|                           | 403073651 | ,000      |
|                           | 403073771 | ,000      |
|                           | 403133102 | ,000      |
|                           | 403133106 | ,000      |
|                           | 403133107 | ,000      |
|                           | 403133109 | ,000      |
|                           | 403133202 | ,000      |
|                           | 403133203 | ,000      |
|                           | 403133204 | ,000      |
|                           | 403133315 | ,000      |
|                           | 403133322 | ,000      |
|                           | 403133401 | ,000      |
|                           | 403133402 | ,000      |
|                           | 403133550 | ,000      |
|                           | 403133772 | ,000      |
|                           | 403135803 | 1,000     |
|                           | 404060001 | ,000      |
|                           | 404060002 | ,000      |
|                           | 404310003 | ,000      |
|                           | 404310004 | ,000      |



## Categorical Variables Codings

|                           |           | Parameter |
|---------------------------|-----------|-----------|
|                           |           | (23)      |
| VASTY2 (SAIR*10000)+VASTY | 403073101 | ,000      |
|                           | 403073102 | ,000      |
|                           | 403073103 | ,000      |
|                           | 403073202 | ,000      |
|                           | 403073203 | ,000      |
|                           | 403073204 | ,000      |
|                           | 403073303 | ,000      |
|                           | 403073651 | ,000      |
|                           | 403073771 | ,000      |
|                           | 403133102 | ,000      |
|                           | 403133106 | ,000      |
|                           | 403133107 | ,000      |
|                           | 403133109 | ,000      |
|                           | 403133202 | ,000      |
|                           | 403133203 | ,000      |
|                           | 403133204 | ,000      |
|                           | 403133315 | ,000      |
|                           | 403133322 | ,000      |
|                           | 403133401 | ,000      |
|                           | 403133402 | ,000      |
|                           | 403133550 | ,000      |
|                           | 403133772 | ,000      |
|                           | 403135803 | ,000      |
|                           | 404060001 | 1,000     |
|                           | 404060002 | ,000      |
|                           | 404310003 | ,000      |
|                           | 404310004 | ,000      |

## Categorical Variables Codings

|                           |           | Parameter |
|---------------------------|-----------|-----------|
|                           |           | (24)      |
| VASTY2 (SAIR*10000)+VASTY | 403073101 | ,000      |
|                           | 403073102 | ,000      |
|                           | 403073103 | ,000      |
|                           | 403073202 | ,000      |
|                           | 403073203 | ,000      |
|                           | 403073204 | ,000      |
|                           | 403073303 | ,000      |
|                           | 403073651 | ,000      |
|                           | 403073771 | ,000      |
|                           | 403133102 | ,000      |
|                           | 403133106 | ,000      |
|                           | 403133107 | ,000      |
|                           | 403133109 | ,000      |
|                           | 403133202 | ,000      |
|                           | 403133203 | ,000      |
|                           | 403133204 | ,000      |
|                           | 403133315 | ,000      |
|                           | 403133322 | ,000      |
|                           | 403133401 | ,000      |
|                           | 403133402 | ,000      |
|                           | 403133550 | ,000      |
|                           | 403133772 | ,000      |
|                           | 403135803 | ,000      |
|                           | 404060001 | ,000      |
|                           | 404060002 | 1,000     |
|                           | 404310003 | ,000      |
|                           | 404310004 | ,000      |

1  
2  
3  
4  
5  
6  
7  
8  
9  
10  
11  
12  
13  
14  
15  
16  
17  
18  
19  
20  
21  
22  
23  
24  
25  
26  
27  
28  
29  
30  
31  
32  
33  
34  
35  
36  
37  
38  
39  
40  
41  
42  
43  
44  
45  
46  
47  
48  
49  
50  
51  
52  
53  
54  
55  
56  
57  
58  
59  
60

**Categorical Variables Codings**

|                           |           | Parameter |
|---------------------------|-----------|-----------|
|                           |           | (25)      |
| VASTY2 (SAIR*10000)+VASTY | 403073101 | ,000      |
|                           | 403073102 | ,000      |
|                           | 403073103 | ,000      |
|                           | 403073202 | ,000      |
|                           | 403073203 | ,000      |
|                           | 403073204 | ,000      |
|                           | 403073303 | ,000      |
|                           | 403073651 | ,000      |
|                           | 403073771 | ,000      |
|                           | 403133102 | ,000      |
|                           | 403133106 | ,000      |
|                           | 403133107 | ,000      |
|                           | 403133109 | ,000      |
|                           | 403133202 | ,000      |
|                           | 403133203 | ,000      |
|                           | 403133204 | ,000      |
|                           | 403133315 | ,000      |
|                           | 403133322 | ,000      |
|                           | 403133401 | ,000      |
|                           | 403133402 | ,000      |
|                           | 403133550 | ,000      |
|                           | 403133772 | ,000      |
|                           | 403135803 | ,000      |
|                           | 404060001 | ,000      |
|                           | 404060002 | ,000      |
|                           | 404310003 | 1,000     |
|                           | 404310004 | ,000      |

BMJ

## Categorical Variables Codings

|                           |           | Parameter |
|---------------------------|-----------|-----------|
|                           |           | (26)      |
| VASTY2 (SAIR*10000)+VASTY | 403073101 | ,000      |
|                           | 403073102 | ,000      |
|                           | 403073103 | ,000      |
|                           | 403073202 | ,000      |
|                           | 403073203 | ,000      |
|                           | 403073204 | ,000      |
|                           | 403073303 | ,000      |
|                           | 403073651 | ,000      |
|                           | 403073771 | ,000      |
|                           | 403133102 | ,000      |
|                           | 403133106 | ,000      |
|                           | 403133107 | ,000      |
|                           | 403133109 | ,000      |
|                           | 403133202 | ,000      |
|                           | 403133203 | ,000      |
|                           | 403133204 | ,000      |
|                           | 403133315 | ,000      |
|                           | 403133322 | ,000      |
|                           | 403133401 | ,000      |
|                           | 403133402 | ,000      |
|                           | 403133550 | ,000      |
|                           | 403133772 | ,000      |
|                           | 403135803 | ,000      |
|                           | 404060001 | ,000      |
|                           | 404060002 | ,000      |
|                           | 404310003 | ,000      |
|                           | 404310004 | 1,000     |

## Categorical Variables Codings

|                           |           | Parameter |
|---------------------------|-----------|-----------|
|                           |           | (27)      |
| VASTY2 (SAIR*10000)+VASTY | 403073101 | ,000      |
|                           | 403073102 | ,000      |
|                           | 403073103 | ,000      |
|                           | 403073202 | ,000      |
|                           | 403073203 | ,000      |
|                           | 403073204 | ,000      |
|                           | 403073303 | ,000      |
|                           | 403073651 | ,000      |
|                           | 403073771 | ,000      |
|                           | 403133102 | ,000      |
|                           | 403133106 | ,000      |
|                           | 403133107 | ,000      |
|                           | 403133109 | ,000      |
|                           | 403133202 | ,000      |
|                           | 403133203 | ,000      |
|                           | 403133204 | ,000      |
|                           | 403133315 | ,000      |
|                           | 403133322 | ,000      |
|                           | 403133401 | ,000      |
|                           | 403133402 | ,000      |
|                           | 403133550 | ,000      |
|                           | 403133772 | ,000      |
|                           | 403135803 | ,000      |
|                           | 404060001 | ,000      |
|                           | 404060002 | ,000      |
|                           | 404310003 | ,000      |
|                           | 404310004 | ,000      |

## Categorical Variables Codings

|                           |           | Parameter |
|---------------------------|-----------|-----------|
|                           |           | (28)      |
| VASTY2 (SAIR*10000)+VASTY | 403073101 | ,000      |
|                           | 403073102 | ,000      |
|                           | 403073103 | ,000      |
|                           | 403073202 | ,000      |
|                           | 403073203 | ,000      |
|                           | 403073204 | ,000      |
|                           | 403073303 | ,000      |
|                           | 403073651 | ,000      |
|                           | 403073771 | ,000      |
|                           | 403133102 | ,000      |
|                           | 403133106 | ,000      |
|                           | 403133107 | ,000      |
|                           | 403133109 | ,000      |
|                           | 403133202 | ,000      |
|                           | 403133203 | ,000      |
|                           | 403133204 | ,000      |
|                           | 403133315 | ,000      |
|                           | 403133322 | ,000      |
|                           | 403133401 | ,000      |
|                           | 403133402 | ,000      |
|                           | 403133550 | ,000      |
|                           | 403133772 | ,000      |
|                           | 403135803 | ,000      |
|                           | 404060001 | ,000      |
|                           | 404060002 | ,000      |
|                           | 404310003 | ,000      |
|                           | 404310004 | ,000      |

## Categorical Variables Codings

|                           |           | Parameter |
|---------------------------|-----------|-----------|
|                           |           | (29)      |
| VASTY2 (SAIR*10000)+VASTY | 403073101 | ,000      |
|                           | 403073102 | ,000      |
|                           | 403073103 | ,000      |
|                           | 403073202 | ,000      |
|                           | 403073203 | ,000      |
|                           | 403073204 | ,000      |
|                           | 403073303 | ,000      |
|                           | 403073651 | ,000      |
|                           | 403073771 | ,000      |
|                           | 403133102 | ,000      |
|                           | 403133106 | ,000      |
|                           | 403133107 | ,000      |
|                           | 403133109 | ,000      |
|                           | 403133202 | ,000      |
|                           | 403133203 | ,000      |
|                           | 403133204 | ,000      |
|                           | 403133315 | ,000      |
|                           | 403133322 | ,000      |
|                           | 403133401 | ,000      |
|                           | 403133402 | ,000      |
|                           | 403133550 | ,000      |
|                           | 403133772 | ,000      |
|                           | 403135803 | ,000      |
|                           | 404060001 | ,000      |
|                           | 404060002 | ,000      |
|                           | 404310003 | ,000      |
|                           | 404310004 | ,000      |

## Categorical Variables Codings

|                           |           | Parameter |
|---------------------------|-----------|-----------|
|                           |           | (30)      |
| VASTY2 (SAIR*10000)+VASTY | 403073101 | ,000      |
|                           | 403073102 | ,000      |
|                           | 403073103 | ,000      |
|                           | 403073202 | ,000      |
|                           | 403073203 | ,000      |
|                           | 403073204 | ,000      |
|                           | 403073303 | ,000      |
|                           | 403073651 | ,000      |
|                           | 403073771 | ,000      |
|                           | 403133102 | ,000      |
|                           | 403133106 | ,000      |
|                           | 403133107 | ,000      |
|                           | 403133109 | ,000      |
|                           | 403133202 | ,000      |
|                           | 403133203 | ,000      |
|                           | 403133204 | ,000      |
|                           | 403133315 | ,000      |
|                           | 403133322 | ,000      |
|                           | 403133401 | ,000      |
|                           | 403133402 | ,000      |
|                           | 403133550 | ,000      |
|                           | 403133772 | ,000      |
|                           | 403135803 | ,000      |
|                           | 404060001 | ,000      |
|                           | 404060002 | ,000      |
|                           | 404310003 | ,000      |
|                           | 404310004 | ,000      |



**Categorical Variables Codings**

|                           |           | Parameter |
|---------------------------|-----------|-----------|
|                           |           | (31)      |
| VASTY2 (SAIR*10000)+VASTY | 403073101 | ,000      |
|                           | 403073102 | ,000      |
|                           | 403073103 | ,000      |
|                           | 403073202 | ,000      |
|                           | 403073203 | ,000      |
|                           | 403073204 | ,000      |
|                           | 403073303 | ,000      |
|                           | 403073651 | ,000      |
|                           | 403073771 | ,000      |
|                           | 403133102 | ,000      |
|                           | 403133106 | ,000      |
|                           | 403133107 | ,000      |
|                           | 403133109 | ,000      |
|                           | 403133202 | ,000      |
|                           | 403133203 | ,000      |
|                           | 403133204 | ,000      |
|                           | 403133315 | ,000      |
|                           | 403133322 | ,000      |
|                           | 403133401 | ,000      |
|                           | 403133402 | ,000      |
|                           | 403133550 | ,000      |
|                           | 403133772 | ,000      |
|                           | 403135803 | ,000      |
|                           | 404060001 | ,000      |
|                           | 404060002 | ,000      |
|                           | 404310003 | ,000      |
|                           | 404310004 | ,000      |

BMJ

## Categorical Variables Codings

|                           |           | Parameter |
|---------------------------|-----------|-----------|
|                           |           | (32)      |
| VASTY2 (SAIR*10000)+VASTY | 403073101 | ,000      |
|                           | 403073102 | ,000      |
|                           | 403073103 | ,000      |
|                           | 403073202 | ,000      |
|                           | 403073203 | ,000      |
|                           | 403073204 | ,000      |
|                           | 403073303 | ,000      |
|                           | 403073651 | ,000      |
|                           | 403073771 | ,000      |
|                           | 403133102 | ,000      |
|                           | 403133106 | ,000      |
|                           | 403133107 | ,000      |
|                           | 403133109 | ,000      |
|                           | 403133202 | ,000      |
|                           | 403133203 | ,000      |
|                           | 403133204 | ,000      |
|                           | 403133315 | ,000      |
|                           | 403133322 | ,000      |
|                           | 403133401 | ,000      |
|                           | 403133402 | ,000      |
|                           | 403133550 | ,000      |
|                           | 403133772 | ,000      |
|                           | 403135803 | ,000      |
|                           | 404060001 | ,000      |
|                           | 404060002 | ,000      |
|                           | 404310003 | ,000      |
|                           | 404310004 | ,000      |

## Categorical Variables Codings

|                           |           | Parameter |
|---------------------------|-----------|-----------|
|                           |           | (33)      |
| VASTY2 (SAIR*10000)+VASTY | 403073101 | ,000      |
|                           | 403073102 | ,000      |
|                           | 403073103 | ,000      |
|                           | 403073202 | ,000      |
|                           | 403073203 | ,000      |
|                           | 403073204 | ,000      |
|                           | 403073303 | ,000      |
|                           | 403073651 | ,000      |
|                           | 403073771 | ,000      |
|                           | 403133102 | ,000      |
|                           | 403133106 | ,000      |
|                           | 403133107 | ,000      |
|                           | 403133109 | ,000      |
|                           | 403133202 | ,000      |
|                           | 403133203 | ,000      |
|                           | 403133204 | ,000      |
|                           | 403133315 | ,000      |
|                           | 403133322 | ,000      |
|                           | 403133401 | ,000      |
|                           | 403133402 | ,000      |
|                           | 403133550 | ,000      |
|                           | 403133772 | ,000      |
|                           | 403135803 | ,000      |
|                           | 404060001 | ,000      |
|                           | 404060002 | ,000      |
|                           | 404310003 | ,000      |
|                           | 404310004 | ,000      |

## Categorical Variables Codings

|                           |           | Parameter |
|---------------------------|-----------|-----------|
|                           |           | (34)      |
| VASTY2 (SAIR*10000)+VASTY | 403073101 | ,000      |
|                           | 403073102 | ,000      |
|                           | 403073103 | ,000      |
|                           | 403073202 | ,000      |
|                           | 403073203 | ,000      |
|                           | 403073204 | ,000      |
|                           | 403073303 | ,000      |
|                           | 403073651 | ,000      |
|                           | 403073771 | ,000      |
|                           | 403133102 | ,000      |
|                           | 403133106 | ,000      |
|                           | 403133107 | ,000      |
|                           | 403133109 | ,000      |
|                           | 403133202 | ,000      |
|                           | 403133203 | ,000      |
|                           | 403133204 | ,000      |
|                           | 403133315 | ,000      |
|                           | 403133322 | ,000      |
|                           | 403133401 | ,000      |
|                           | 403133402 | ,000      |
|                           | 403133550 | ,000      |
|                           | 403133772 | ,000      |
|                           | 403135803 | ,000      |
|                           | 404060001 | ,000      |
|                           | 404060002 | ,000      |
|                           | 404310003 | ,000      |
|                           | 404310004 | ,000      |

1  
2  
3  
4  
5  
6  
7  
8  
9  
10  
11  
12  
13  
14  
15  
16  
17  
18  
19  
20  
21  
22  
23  
24  
25  
26  
27  
28  
29  
30  
31  
32  
33  
34  
35  
36  
37  
38  
39  
40  
41  
42  
43  
44  
45  
46  
47  
48  
49  
50  
51  
52  
53  
54  
55  
56  
57  
58  
59  
60

**Categorical Variables Codings**

|                           |           | Paramete... |
|---------------------------|-----------|-------------|
|                           |           | (35)        |
| VASTY2 (SAIR*10000)+VASTY | 403073101 | ,000        |
|                           | 403073102 | ,000        |
|                           | 403073103 | ,000        |
|                           | 403073202 | ,000        |
|                           | 403073203 | ,000        |
|                           | 403073204 | ,000        |
|                           | 403073303 | ,000        |
|                           | 403073651 | ,000        |
|                           | 403073771 | ,000        |
|                           | 403133102 | ,000        |
|                           | 403133106 | ,000        |
|                           | 403133107 | ,000        |
|                           | 403133109 | ,000        |
|                           | 403133202 | ,000        |
|                           | 403133203 | ,000        |
|                           | 403133204 | ,000        |
|                           | 403133315 | ,000        |
|                           | 403133322 | ,000        |
|                           | 403133401 | ,000        |
|                           | 403133402 | ,000        |
|                           | 403133550 | ,000        |
|                           | 403133772 | ,000        |
|                           | 403135803 | ,000        |
|                           | 404060001 | ,000        |
|                           | 404060002 | ,000        |
|                           | 404310003 | ,000        |
|                           | 404310004 | ,000        |

BMJ

## Categorical Variables Codings

|                                             |                                         | Frequency |
|---------------------------------------------|-----------------------------------------|-----------|
|                                             | 502300005                               | 366       |
|                                             | 502300006                               | 225       |
|                                             | 502300007                               | 366       |
|                                             | 502300214                               | 366       |
|                                             | 502300411                               | 366       |
|                                             | 502300415                               | 360       |
|                                             | 502300416                               | 363       |
|                                             | 502300811                               | 364       |
|                                             | 502300913                               | 315       |
| weekday veckodag                            | 1 måndag                                | 1805      |
|                                             | 2 tisdag                                | 1812      |
|                                             | 3 onsdag                                | 1800      |
|                                             | 4 torsdag                               | 1794      |
|                                             | 5 fredag                                | 1788      |
|                                             | 6 lördag                                | 1735      |
|                                             | 7 söndag                                | 1741      |
| season säsong/period                        | 1 januari-mars                          | 3182      |
|                                             | 2 april-maj                             | 2127      |
|                                             | 3 juni-augusti                          | 2911      |
|                                             | 4 september-oktober                     | 2144      |
|                                             | 5 november-december                     | 2111      |
| bv2 belastning vs paoncil halva intervallet | 1 medelbelastning                       | 2788      |
|                                             | 2 underbelastning                       | 4419      |
|                                             | 3 överbelastning                        | 5268      |
| holiday större helg                         | 1 ingen större helg                     | 12078     |
|                                             | 2 större helg (påsk/midsommar/julonyår) | 397       |

## Categorical Variables Codings

|                                             |                                         | Parameter |
|---------------------------------------------|-----------------------------------------|-----------|
|                                             |                                         | (1)       |
|                                             | 502300005                               | ,000      |
|                                             | 502300006                               | ,000      |
|                                             | 502300007                               | ,000      |
|                                             | 502300214                               | ,000      |
|                                             | 502300411                               | ,000      |
|                                             | 502300415                               | ,000      |
|                                             | 502300416                               | ,000      |
|                                             | 502300811                               | ,000      |
|                                             | 502300913                               | ,000      |
| weekday veckodag                            | 1 måndag                                | ,000      |
|                                             | 2 tisdag                                | 1,000     |
|                                             | 3 onsdag                                | ,000      |
|                                             | 4 torsdag                               | ,000      |
|                                             | 5 fredag                                | ,000      |
|                                             | 6 lördag                                | ,000      |
|                                             | 7 söndag                                | ,000      |
| season säsong/period                        | 1 januari-mars                          | ,000      |
|                                             | 2 april-maj                             | 1,000     |
|                                             | 3 juni-augusti                          | ,000      |
|                                             | 4 september-oktober                     | ,000      |
|                                             | 5 november-december                     | ,000      |
| bv2 belastning vs paoncil halva intervallet | 1 medelbelastning                       | ,000      |
|                                             | 2 underbelastning                       | 1,000     |
|                                             | 3 överbelastning                        | ,000      |
| holiday större helg                         | 1 ingen större helg                     | ,000      |
|                                             | 2 större helg (påsk/midsommar/julonyår) | 1,000     |

## Categorical Variables Codings

|                                             |                                         | Parameter |
|---------------------------------------------|-----------------------------------------|-----------|
|                                             |                                         | (2)       |
|                                             | 502300005                               | ,000      |
|                                             | 502300006                               | ,000      |
|                                             | 502300007                               | ,000      |
|                                             | 502300214                               | ,000      |
|                                             | 502300411                               | ,000      |
|                                             | 502300415                               | ,000      |
|                                             | 502300416                               | ,000      |
|                                             | 502300811                               | ,000      |
|                                             | 502300913                               | ,000      |
| weekday veckodag                            | 1 måndag                                | ,000      |
|                                             | 2 tisdag                                | ,000      |
|                                             | 3 onsdag                                | 1,000     |
|                                             | 4 torsdag                               | ,000      |
|                                             | 5 fredag                                | ,000      |
|                                             | 6 lördag                                | ,000      |
|                                             | 7 söndag                                | ,000      |
| season säsong/period                        | 1 januari-mars                          | ,000      |
|                                             | 2 april-maj                             | ,000      |
|                                             | 3 juni-augusti                          | 1,000     |
|                                             | 4 september-oktober                     | ,000      |
|                                             | 5 november-december                     | ,000      |
| bv2 belastning vs paoncil halva intervallet | 1 medelbelastning                       | ,000      |
|                                             | 2 underbelastning                       | ,000      |
|                                             | 3 överbelastning                        | 1,000     |
| holiday större helg                         | 1 ingen större helg                     |           |
|                                             | 2 större helg (påsk/midsommar/julonyår) |           |



## Categorical Variables Codings

|                                             |                                         | Parameter |
|---------------------------------------------|-----------------------------------------|-----------|
|                                             |                                         | (3)       |
|                                             | 502300005                               | ,000      |
|                                             | 502300006                               | ,000      |
|                                             | 502300007                               | ,000      |
|                                             | 502300214                               | ,000      |
|                                             | 502300411                               | ,000      |
|                                             | 502300415                               | ,000      |
|                                             | 502300416                               | ,000      |
|                                             | 502300811                               | ,000      |
|                                             | 502300913                               | ,000      |
| weekday veckodag                            | 1 måndag                                | ,000      |
|                                             | 2 tisdag                                | ,000      |
|                                             | 3 onsdag                                | ,000      |
|                                             | 4 torsdag                               | 1,000     |
|                                             | 5 fredag                                | ,000      |
|                                             | 6 lördag                                | ,000      |
|                                             | 7 söndag                                | ,000      |
| season säsong/period                        | 1 januari-mars                          | ,000      |
|                                             | 2 april-maj                             | ,000      |
|                                             | 3 juni-augusti                          | ,000      |
|                                             | 4 september-oktober                     | 1,000     |
|                                             | 5 november-december                     | ,000      |
| bv2 belastning vs paoncil halva intervallet | 1 medelbelastning                       |           |
|                                             | 2 underbelastning                       |           |
|                                             | 3 överbelastning                        |           |
| holiday större helg                         | 1 ingen större helg                     |           |
|                                             | 2 större helg (påsk/midsommar/julonyår) |           |

## Categorical Variables Codings

|                                             |                                         | Parameter |
|---------------------------------------------|-----------------------------------------|-----------|
|                                             |                                         | (4)       |
|                                             | 502300005                               | ,000      |
|                                             | 502300006                               | ,000      |
|                                             | 502300007                               | ,000      |
|                                             | 502300214                               | ,000      |
|                                             | 502300411                               | ,000      |
|                                             | 502300415                               | ,000      |
|                                             | 502300416                               | ,000      |
|                                             | 502300811                               | ,000      |
|                                             | 502300913                               | ,000      |
| weekday veckodag                            | 1 måndag                                | ,000      |
|                                             | 2 tisdag                                | ,000      |
|                                             | 3 onsdag                                | ,000      |
|                                             | 4 torsdag                               | ,000      |
|                                             | 5 fredag                                | 1,000     |
|                                             | 6 lördag                                | ,000      |
|                                             | 7 söndag                                | ,000      |
| season säsong/period                        | 1 januari-mars                          | ,000      |
|                                             | 2 april-maj                             | ,000      |
|                                             | 3 juni-augusti                          | ,000      |
|                                             | 4 september-oktober                     | ,000      |
|                                             | 5 november-december                     | 1,000     |
| bv2 belastning vs paoncil halva intervallet | 1 medelbelastning                       |           |
|                                             | 2 underbelastning                       |           |
|                                             | 3 överbelastning                        |           |
| holiday större helg                         | 1 ingen större helg                     |           |
|                                             | 2 större helg (påsk/midsommar/julonyår) |           |

## Categorical Variables Codings

|                                             |                                         | Parameter |
|---------------------------------------------|-----------------------------------------|-----------|
|                                             |                                         | (5)       |
|                                             | 502300005                               | ,000      |
|                                             | 502300006                               | ,000      |
|                                             | 502300007                               | ,000      |
|                                             | 502300214                               | ,000      |
|                                             | 502300411                               | ,000      |
|                                             | 502300415                               | ,000      |
|                                             | 502300416                               | ,000      |
|                                             | 502300811                               | ,000      |
|                                             | 502300913                               | ,000      |
| weekday veckodag                            | 1 måndag                                | ,000      |
|                                             | 2 tisdag                                | ,000      |
|                                             | 3 onsdag                                | ,000      |
|                                             | 4 torsdag                               | ,000      |
|                                             | 5 fredag                                | ,000      |
|                                             | 6 lördag                                | 1,000     |
|                                             | 7 söndag                                | ,000      |
| season säsong/period                        | 1 januari-mars                          |           |
|                                             | 2 april-maj                             |           |
|                                             | 3 juni-augusti                          |           |
|                                             | 4 september-oktober                     |           |
|                                             | 5 november-december                     |           |
| bv2 belastning vs paoncil halva intervallet | 1 medelbelastning                       |           |
|                                             | 2 underbelastning                       |           |
|                                             | 3 överbelastning                        |           |
| holiday större helg                         | 1 ingen större helg                     |           |
|                                             | 2 större helg (påsk/midsommar/julonyår) |           |

## Categorical Variables Codings

|                                             |                                         | Parameter |
|---------------------------------------------|-----------------------------------------|-----------|
|                                             |                                         | (6)       |
|                                             | 502300005                               | ,000      |
|                                             | 502300006                               | ,000      |
|                                             | 502300007                               | ,000      |
|                                             | 502300214                               | ,000      |
|                                             | 502300411                               | ,000      |
|                                             | 502300415                               | ,000      |
|                                             | 502300416                               | ,000      |
|                                             | 502300811                               | ,000      |
|                                             | 502300913                               | ,000      |
| weekday veckodag                            | 1 måndag                                | ,000      |
|                                             | 2 tisdag                                | ,000      |
|                                             | 3 onsdag                                | ,000      |
|                                             | 4 torsdag                               | ,000      |
|                                             | 5 fredag                                | ,000      |
|                                             | 6 lördag                                | ,000      |
|                                             | 7 söndag                                | 1,000     |
| season säsong/period                        | 1 januari-mars                          |           |
|                                             | 2 april-maj                             |           |
|                                             | 3 juni-augusti                          |           |
|                                             | 4 september-oktober                     |           |
|                                             | 5 november-december                     |           |
| bv2 belastning vs paoncil halva intervallet | 1 medelbelastning                       |           |
|                                             | 2 underbelastning                       |           |
|                                             | 3 överbelastning                        |           |
| holiday större helg                         | 1 ingen större helg                     |           |
|                                             | 2 större helg (påsk/midsommar/julonyår) |           |

## Categorical Variables Codings

|                                             |                                         | Parameter |
|---------------------------------------------|-----------------------------------------|-----------|
|                                             |                                         | (7)       |
|                                             | 502300005                               | ,000      |
|                                             | 502300006                               | ,000      |
|                                             | 502300007                               | ,000      |
|                                             | 502300214                               | ,000      |
|                                             | 502300411                               | ,000      |
|                                             | 502300415                               | ,000      |
|                                             | 502300416                               | ,000      |
|                                             | 502300811                               | ,000      |
|                                             | 502300913                               | ,000      |
| weekday veckodag                            | 1 måndag                                |           |
|                                             | 2 tisdag                                |           |
|                                             | 3 onsdag                                |           |
|                                             | 4 torsdag                               |           |
|                                             | 5 fredag                                |           |
|                                             | 6 lördag                                |           |
|                                             | 7 söndag                                |           |
| season säsong/period                        | 1 januari-mars                          |           |
|                                             | 2 april-maj                             |           |
|                                             | 3 juni-augusti                          |           |
|                                             | 4 september-oktober                     |           |
|                                             | 5 november-december                     |           |
| bv2 belastning vs paoncil halva intervallet | 1 medelbelastning                       |           |
|                                             | 2 underbelastning                       |           |
|                                             | 3 överbelastning                        |           |
| holiday större helg                         | 1 ingen större helg                     |           |
|                                             | 2 större helg (påsk/midsommar/julonyår) |           |

## Categorical Variables Codings

|                                             |                                         | Parameter |
|---------------------------------------------|-----------------------------------------|-----------|
|                                             |                                         | (8)       |
|                                             | 502300005                               | ,000      |
|                                             | 502300006                               | ,000      |
|                                             | 502300007                               | ,000      |
|                                             | 502300214                               | ,000      |
|                                             | 502300411                               | ,000      |
|                                             | 502300415                               | ,000      |
|                                             | 502300416                               | ,000      |
|                                             | 502300811                               | ,000      |
|                                             | 502300913                               | ,000      |
| weekday veckodag                            | 1 måndag                                |           |
|                                             | 2 tisdag                                |           |
|                                             | 3 onsdag                                |           |
|                                             | 4 torsdag                               |           |
|                                             | 5 fredag                                |           |
|                                             | 6 lördag                                |           |
|                                             | 7 söndag                                |           |
| season säsong/period                        | 1 januari-mars                          |           |
|                                             | 2 april-maj                             |           |
|                                             | 3 juni-augusti                          |           |
|                                             | 4 september-oktober                     |           |
|                                             | 5 november-december                     |           |
| bv2 belastning vs paoncil halva intervallet | 1 medelbelastning                       |           |
|                                             | 2 underbelastning                       |           |
|                                             | 3 överbelastning                        |           |
| holiday större helg                         | 1 ingen större helg                     |           |
|                                             | 2 större helg (påsk/midsommar/julonyår) |           |

## Categorical Variables Codings

|                                             |                                         | Parameter |
|---------------------------------------------|-----------------------------------------|-----------|
|                                             |                                         | (9)       |
|                                             | 502300005                               | ,000      |
|                                             | 502300006                               | ,000      |
|                                             | 502300007                               | ,000      |
|                                             | 502300214                               | ,000      |
|                                             | 502300411                               | ,000      |
|                                             | 502300415                               | ,000      |
|                                             | 502300416                               | ,000      |
|                                             | 502300811                               | ,000      |
|                                             | 502300913                               | ,000      |
| weekday veckodag                            | 1 måndag                                |           |
|                                             | 2 tisdag                                |           |
|                                             | 3 onsdag                                |           |
|                                             | 4 torsdag                               |           |
|                                             | 5 fredag                                |           |
|                                             | 6 lördag                                |           |
|                                             | 7 söndag                                |           |
| season säsong/period                        | 1 januari-mars                          |           |
|                                             | 2 april-maj                             |           |
|                                             | 3 juni-augusti                          |           |
|                                             | 4 september-oktober                     |           |
|                                             | 5 november-december                     |           |
| bv2 belastning vs paoncil halva intervallet | 1 medelbelastning                       |           |
|                                             | 2 underbelastning                       |           |
|                                             | 3 överbelastning                        |           |
| holiday större helg                         | 1 ingen större helg                     |           |
|                                             | 2 större helg (påsk/midsommar/julonyår) |           |

## Categorical Variables Codings

|                                             |                                         | Parameter |
|---------------------------------------------|-----------------------------------------|-----------|
|                                             |                                         | (10)      |
|                                             | 502300005                               | ,000      |
|                                             | 502300006                               | ,000      |
|                                             | 502300007                               | ,000      |
|                                             | 502300214                               | ,000      |
|                                             | 502300411                               | ,000      |
|                                             | 502300415                               | ,000      |
|                                             | 502300416                               | ,000      |
|                                             | 502300811                               | ,000      |
|                                             | 502300913                               | ,000      |
| weekday veckodag                            | 1 måndag                                |           |
|                                             | 2 tisdag                                |           |
|                                             | 3 onsdag                                |           |
|                                             | 4 torsdag                               |           |
|                                             | 5 fredag                                |           |
|                                             | 6 lördag                                |           |
|                                             | 7 söndag                                |           |
| season säsong/period                        | 1 januari-mars                          |           |
|                                             | 2 april-maj                             |           |
|                                             | 3 juni-augusti                          |           |
|                                             | 4 september-oktober                     |           |
|                                             | 5 november-december                     |           |
| bv2 belastning vs paoncil halva intervallet | 1 medelbelastning                       |           |
|                                             | 2 underbelastning                       |           |
|                                             | 3 överbelastning                        |           |
| holiday större helg                         | 1 ingen större helg                     |           |
|                                             | 2 större helg (påsk/midsommar/julonyår) |           |



## Categorical Variables Codings

|                                             |                                         | Parameter |
|---------------------------------------------|-----------------------------------------|-----------|
|                                             |                                         | (1)       |
|                                             | 502300005                               | ,000      |
|                                             | 502300006                               | ,000      |
|                                             | 502300007                               | ,000      |
|                                             | 502300214                               | ,000      |
|                                             | 502300411                               | ,000      |
|                                             | 502300415                               | ,000      |
|                                             | 502300416                               | ,000      |
|                                             | 502300811                               | ,000      |
|                                             | 502300913                               | ,000      |
| weekday veckodag                            | 1 måndag                                |           |
|                                             | 2 tisdag                                |           |
|                                             | 3 onsdag                                |           |
|                                             | 4 torsdag                               |           |
|                                             | 5 fredag                                |           |
|                                             | 6 lördag                                |           |
|                                             | 7 söndag                                |           |
| season säsong/period                        | 1 januari-mars                          |           |
|                                             | 2 april-maj                             |           |
|                                             | 3 juni-augusti                          |           |
|                                             | 4 september-oktober                     |           |
|                                             | 5 november-december                     |           |
| bv2 belastning vs paoncil halva intervallet | 1 medelbelastning                       |           |
|                                             | 2 underbelastning                       |           |
|                                             | 3 överbelastning                        |           |
| holiday större helg                         | 1 ingen större helg                     |           |
|                                             | 2 större helg (påsk/midsommar/julonyår) |           |

## Categorical Variables Codings

|                                             |                                         | Parameter |
|---------------------------------------------|-----------------------------------------|-----------|
|                                             |                                         | (12)      |
|                                             | 502300005                               | ,000      |
|                                             | 502300006                               | ,000      |
|                                             | 502300007                               | ,000      |
|                                             | 502300214                               | ,000      |
|                                             | 502300411                               | ,000      |
|                                             | 502300415                               | ,000      |
|                                             | 502300416                               | ,000      |
|                                             | 502300811                               | ,000      |
|                                             | 502300913                               | ,000      |
| weekday veckodag                            | 1 måndag                                |           |
|                                             | 2 tisdag                                |           |
|                                             | 3 onsdag                                |           |
|                                             | 4 torsdag                               |           |
|                                             | 5 fredag                                |           |
|                                             | 6 lördag                                |           |
|                                             | 7 söndag                                |           |
| season säsong/period                        | 1 januari-mars                          |           |
|                                             | 2 april-maj                             |           |
|                                             | 3 juni-augusti                          |           |
|                                             | 4 september-oktober                     |           |
|                                             | 5 november-december                     |           |
| bv2 belastning vs paoncil halva intervallet | 1 medelbelastning                       |           |
|                                             | 2 underbelastning                       |           |
|                                             | 3 överbelastning                        |           |
| holiday större helg                         | 1 ingen större helg                     |           |
|                                             | 2 större helg (påsk/midsommar/julonyår) |           |

## Categorical Variables Codings

|                                             |                                         | Parameter |
|---------------------------------------------|-----------------------------------------|-----------|
|                                             |                                         | (13)      |
|                                             | 502300005                               | ,000      |
|                                             | 502300006                               | ,000      |
|                                             | 502300007                               | ,000      |
|                                             | 502300214                               | ,000      |
|                                             | 502300411                               | ,000      |
|                                             | 502300415                               | ,000      |
|                                             | 502300416                               | ,000      |
|                                             | 502300811                               | ,000      |
|                                             | 502300913                               | ,000      |
| weekday veckodag                            | 1 måndag                                |           |
|                                             | 2 tisdag                                |           |
|                                             | 3 onsdag                                |           |
|                                             | 4 torsdag                               |           |
|                                             | 5 fredag                                |           |
|                                             | 6 lördag                                |           |
|                                             | 7 söndag                                |           |
| season säsong/period                        | 1 januari-mars                          |           |
|                                             | 2 april-maj                             |           |
|                                             | 3 juni-augusti                          |           |
|                                             | 4 september-oktober                     |           |
|                                             | 5 november-december                     |           |
| bv2 belastning vs paoncil halva intervallet | 1 medelbelastning                       |           |
|                                             | 2 underbelastning                       |           |
|                                             | 3 överbelastning                        |           |
| holiday större helg                         | 1 ingen större helg                     |           |
|                                             | 2 större helg (påsk/midsommar/julonyår) |           |

## Categorical Variables Codings

|                                             |                                         | Parameter |
|---------------------------------------------|-----------------------------------------|-----------|
|                                             |                                         | (14)      |
|                                             | 502300005                               | ,000      |
|                                             | 502300006                               | ,000      |
|                                             | 502300007                               | ,000      |
|                                             | 502300214                               | ,000      |
|                                             | 502300411                               | ,000      |
|                                             | 502300415                               | ,000      |
|                                             | 502300416                               | ,000      |
|                                             | 502300811                               | ,000      |
|                                             | 502300913                               | ,000      |
| weekday veckodag                            | 1 måndag                                |           |
|                                             | 2 tisdag                                |           |
|                                             | 3 onsdag                                |           |
|                                             | 4 torsdag                               |           |
|                                             | 5 fredag                                |           |
|                                             | 6 lördag                                |           |
|                                             | 7 söndag                                |           |
| season säsong/period                        | 1 januari-mars                          |           |
|                                             | 2 april-maj                             |           |
|                                             | 3 juni-augusti                          |           |
|                                             | 4 september-oktober                     |           |
|                                             | 5 november-december                     |           |
| bv2 belastning vs paoncil halva intervallet | 1 medelbelastning                       |           |
|                                             | 2 underbelastning                       |           |
|                                             | 3 överbelastning                        |           |
| holiday större helg                         | 1 ingen större helg                     |           |
|                                             | 2 större helg (påsk/midsommar/julonyår) |           |

## Categorical Variables Codings

|                                             |                                         | Parameter |
|---------------------------------------------|-----------------------------------------|-----------|
|                                             |                                         | (15)      |
|                                             | 502300005                               | ,000      |
|                                             | 502300006                               | ,000      |
|                                             | 502300007                               | ,000      |
|                                             | 502300214                               | ,000      |
|                                             | 502300411                               | ,000      |
|                                             | 502300415                               | ,000      |
|                                             | 502300416                               | ,000      |
|                                             | 502300811                               | ,000      |
|                                             | 502300913                               | ,000      |
| weekday veckodag                            | 1 måndag                                |           |
|                                             | 2 tisdag                                |           |
|                                             | 3 onsdag                                |           |
|                                             | 4 torsdag                               |           |
|                                             | 5 fredag                                |           |
|                                             | 6 lördag                                |           |
|                                             | 7 söndag                                |           |
| season säsong/period                        | 1 januari-mars                          |           |
|                                             | 2 april-maj                             |           |
|                                             | 3 juni-augusti                          |           |
|                                             | 4 september-oktober                     |           |
|                                             | 5 november-december                     |           |
| bv2 belastning vs paoncil halva intervallet | 1 medelbelastning                       |           |
|                                             | 2 underbelastning                       |           |
|                                             | 3 överbelastning                        |           |
| holiday större helg                         | 1 ingen större helg                     |           |
|                                             | 2 större helg (påsk/midsommar/julonyår) |           |

## Categorical Variables Codings

|                                             |                                         | Parameter |
|---------------------------------------------|-----------------------------------------|-----------|
|                                             |                                         | (16)      |
|                                             | 502300005                               | ,000      |
|                                             | 502300006                               | ,000      |
|                                             | 502300007                               | ,000      |
|                                             | 502300214                               | ,000      |
|                                             | 502300411                               | ,000      |
|                                             | 502300415                               | ,000      |
|                                             | 502300416                               | ,000      |
|                                             | 502300811                               | ,000      |
|                                             | 502300913                               | ,000      |
| weekday veckodag                            | 1 måndag                                |           |
|                                             | 2 tisdag                                |           |
|                                             | 3 onsdag                                |           |
|                                             | 4 torsdag                               |           |
|                                             | 5 fredag                                |           |
|                                             | 6 lördag                                |           |
|                                             | 7 söndag                                |           |
| season säsong/period                        | 1 januari-mars                          |           |
|                                             | 2 april-maj                             |           |
|                                             | 3 juni-augusti                          |           |
|                                             | 4 september-oktober                     |           |
|                                             | 5 november-december                     |           |
| bv2 belastning vs paoncil halva intervallet | 1 medelbelastning                       |           |
|                                             | 2 underbelastning                       |           |
|                                             | 3 överbelastning                        |           |
| holiday större helg                         | 1 ingen större helg                     |           |
|                                             | 2 större helg (påsk/midsommar/julonyår) |           |

## Categorical Variables Codings

|                                             |                                         | Parameter |
|---------------------------------------------|-----------------------------------------|-----------|
|                                             |                                         | (17)      |
|                                             | 502300005                               | ,000      |
|                                             | 502300006                               | ,000      |
|                                             | 502300007                               | ,000      |
|                                             | 502300214                               | ,000      |
|                                             | 502300411                               | ,000      |
|                                             | 502300415                               | ,000      |
|                                             | 502300416                               | ,000      |
|                                             | 502300811                               | ,000      |
|                                             | 502300913                               | ,000      |
| weekday veckodag                            | 1 måndag                                |           |
|                                             | 2 tisdag                                |           |
|                                             | 3 onsdag                                |           |
|                                             | 4 torsdag                               |           |
|                                             | 5 fredag                                |           |
|                                             | 6 lördag                                |           |
|                                             | 7 söndag                                |           |
| season säsong/period                        | 1 januari-mars                          |           |
|                                             | 2 april-maj                             |           |
|                                             | 3 juni-augusti                          |           |
|                                             | 4 september-oktober                     |           |
|                                             | 5 november-december                     |           |
| bv2 belastning vs paoncil halva intervallet | 1 medelbelastning                       |           |
|                                             | 2 underbelastning                       |           |
|                                             | 3 överbelastning                        |           |
| holiday större helg                         | 1 ingen större helg                     |           |
|                                             | 2 större helg (påsk/midsommar/julonyår) |           |

## Categorical Variables Codings

|                                             |                                         | Parameter |
|---------------------------------------------|-----------------------------------------|-----------|
|                                             |                                         | (18)      |
|                                             | 502300005                               | ,000      |
|                                             | 502300006                               | ,000      |
|                                             | 502300007                               | ,000      |
|                                             | 502300214                               | ,000      |
|                                             | 502300411                               | ,000      |
|                                             | 502300415                               | ,000      |
|                                             | 502300416                               | ,000      |
|                                             | 502300811                               | ,000      |
|                                             | 502300913                               | ,000      |
| weekday veckodag                            | 1 måndag                                |           |
|                                             | 2 tisdag                                |           |
|                                             | 3 onsdag                                |           |
|                                             | 4 torsdag                               |           |
|                                             | 5 fredag                                |           |
|                                             | 6 lördag                                |           |
|                                             | 7 söndag                                |           |
| season säsong/period                        | 1 januari-mars                          |           |
|                                             | 2 april-maj                             |           |
|                                             | 3 juni-augusti                          |           |
|                                             | 4 september-oktober                     |           |
|                                             | 5 november-december                     |           |
| bv2 belastning vs paoncil halva intervallet | 1 medelbelastning                       |           |
|                                             | 2 underbelastning                       |           |
|                                             | 3 överbelastning                        |           |
| holiday större helg                         | 1 ingen större helg                     |           |
|                                             | 2 större helg (påsk/midsommar/julonyår) |           |



## Categorical Variables Codings

|                                             |                                         | Parameter |
|---------------------------------------------|-----------------------------------------|-----------|
|                                             |                                         | (19)      |
|                                             | 502300005                               | ,000      |
|                                             | 502300006                               | ,000      |
|                                             | 502300007                               | ,000      |
|                                             | 502300214                               | ,000      |
|                                             | 502300411                               | ,000      |
|                                             | 502300415                               | ,000      |
|                                             | 502300416                               | ,000      |
|                                             | 502300811                               | ,000      |
|                                             | 502300913                               | ,000      |
| weekday veckodag                            | 1 måndag                                |           |
|                                             | 2 tisdag                                |           |
|                                             | 3 onsdag                                |           |
|                                             | 4 torsdag                               |           |
|                                             | 5 fredag                                |           |
|                                             | 6 lördag                                |           |
|                                             | 7 söndag                                |           |
| season säsong/period                        | 1 januari-mars                          |           |
|                                             | 2 april-maj                             |           |
|                                             | 3 juni-augusti                          |           |
|                                             | 4 september-oktober                     |           |
|                                             | 5 november-december                     |           |
| bv2 belastning vs paoncil halva intervallet | 1 medelbelastning                       |           |
|                                             | 2 underbelastning                       |           |
|                                             | 3 överbelastning                        |           |
| holiday större helg                         | 1 ingen större helg                     |           |
|                                             | 2 större helg (påsk/midsommar/julonyår) |           |

## Categorical Variables Codings

|                                             |                                         | Parameter |
|---------------------------------------------|-----------------------------------------|-----------|
|                                             |                                         | (20)      |
|                                             | 502300005                               | ,000      |
|                                             | 502300006                               | ,000      |
|                                             | 502300007                               | ,000      |
|                                             | 502300214                               | ,000      |
|                                             | 502300411                               | ,000      |
|                                             | 502300415                               | ,000      |
|                                             | 502300416                               | ,000      |
|                                             | 502300811                               | ,000      |
|                                             | 502300913                               | ,000      |
| weekday veckodag                            | 1 måndag                                |           |
|                                             | 2 tisdag                                |           |
|                                             | 3 onsdag                                |           |
|                                             | 4 torsdag                               |           |
|                                             | 5 fredag                                |           |
|                                             | 6 lördag                                |           |
|                                             | 7 söndag                                |           |
| season säsong/period                        | 1 januari-mars                          |           |
|                                             | 2 april-maj                             |           |
|                                             | 3 juni-augusti                          |           |
|                                             | 4 september-oktober                     |           |
|                                             | 5 november-december                     |           |
| bv2 belastning vs paoncil halva intervallet | 1 medelbelastning                       |           |
|                                             | 2 underbelastning                       |           |
|                                             | 3 överbelastning                        |           |
| holiday större helg                         | 1 ingen större helg                     |           |
|                                             | 2 större helg (påsk/midsommar/julonyår) |           |

## Categorical Variables Codings

|                                             |                                         | Parameter |
|---------------------------------------------|-----------------------------------------|-----------|
|                                             |                                         | (21)      |
|                                             | 502300005                               | ,000      |
|                                             | 502300006                               | ,000      |
|                                             | 502300007                               | ,000      |
|                                             | 502300214                               | ,000      |
|                                             | 502300411                               | ,000      |
|                                             | 502300415                               | ,000      |
|                                             | 502300416                               | ,000      |
|                                             | 502300811                               | ,000      |
|                                             | 502300913                               | ,000      |
| weekday veckodag                            | 1 måndag                                |           |
|                                             | 2 tisdag                                |           |
|                                             | 3 onsdag                                |           |
|                                             | 4 torsdag                               |           |
|                                             | 5 fredag                                |           |
|                                             | 6 lördag                                |           |
|                                             | 7 söndag                                |           |
| season säsong/period                        | 1 januari-mars                          |           |
|                                             | 2 april-maj                             |           |
|                                             | 3 juni-augusti                          |           |
|                                             | 4 september-oktober                     |           |
|                                             | 5 november-december                     |           |
| bv2 belastning vs paoncil halva intervallet | 1 medelbelastning                       |           |
|                                             | 2 underbelastning                       |           |
|                                             | 3 överbelastning                        |           |
| holiday större helg                         | 1 ingen större helg                     |           |
|                                             | 2 större helg (påsk/midsommar/julonyår) |           |

## Categorical Variables Codings

|                                             |                                         | Parameter |
|---------------------------------------------|-----------------------------------------|-----------|
|                                             |                                         | (22)      |
|                                             | 502300005                               | ,000      |
|                                             | 502300006                               | ,000      |
|                                             | 502300007                               | ,000      |
|                                             | 502300214                               | ,000      |
|                                             | 502300411                               | ,000      |
|                                             | 502300415                               | ,000      |
|                                             | 502300416                               | ,000      |
|                                             | 502300811                               | ,000      |
|                                             | 502300913                               | ,000      |
| weekday veckodag                            | 1 måndag                                |           |
|                                             | 2 tisdag                                |           |
|                                             | 3 onsdag                                |           |
|                                             | 4 torsdag                               |           |
|                                             | 5 fredag                                |           |
|                                             | 6 lördag                                |           |
|                                             | 7 söndag                                |           |
| season säsong/period                        | 1 januari-mars                          |           |
|                                             | 2 april-maj                             |           |
|                                             | 3 juni-augusti                          |           |
|                                             | 4 september-oktober                     |           |
|                                             | 5 november-december                     |           |
| bv2 belastning vs paoncil halva intervallet | 1 medelbelastning                       |           |
|                                             | 2 underbelastning                       |           |
|                                             | 3 överbelastning                        |           |
| holiday större helg                         | 1 ingen större helg                     |           |
|                                             | 2 större helg (påsk/midsommar/julonyår) |           |

## Categorical Variables Codings

|                                             |                                         | Parameter |
|---------------------------------------------|-----------------------------------------|-----------|
|                                             |                                         | (23)      |
|                                             | 502300005                               | ,000      |
|                                             | 502300006                               | ,000      |
|                                             | 502300007                               | ,000      |
|                                             | 502300214                               | ,000      |
|                                             | 502300411                               | ,000      |
|                                             | 502300415                               | ,000      |
|                                             | 502300416                               | ,000      |
|                                             | 502300811                               | ,000      |
|                                             | 502300913                               | ,000      |
| weekday veckodag                            | 1 måndag                                |           |
|                                             | 2 tisdag                                |           |
|                                             | 3 onsdag                                |           |
|                                             | 4 torsdag                               |           |
|                                             | 5 fredag                                |           |
|                                             | 6 lördag                                |           |
|                                             | 7 söndag                                |           |
| season säsong/period                        | 1 januari-mars                          |           |
|                                             | 2 april-maj                             |           |
|                                             | 3 juni-augusti                          |           |
|                                             | 4 september-oktober                     |           |
|                                             | 5 november-december                     |           |
| bv2 belastning vs paoncil halva intervallet | 1 medelbelastning                       |           |
|                                             | 2 underbelastning                       |           |
|                                             | 3 överbelastning                        |           |
| holiday större helg                         | 1 ingen större helg                     |           |
|                                             | 2 större helg (påsk/midsommar/julonyår) |           |

## Categorical Variables Codings

|                                             |                                         | Parameter |
|---------------------------------------------|-----------------------------------------|-----------|
|                                             |                                         | (24)      |
|                                             | 502300005                               | ,000      |
|                                             | 502300006                               | ,000      |
|                                             | 502300007                               | ,000      |
|                                             | 502300214                               | ,000      |
|                                             | 502300411                               | ,000      |
|                                             | 502300415                               | ,000      |
|                                             | 502300416                               | ,000      |
|                                             | 502300811                               | ,000      |
|                                             | 502300913                               | ,000      |
| weekday veckodag                            | 1 måndag                                |           |
|                                             | 2 tisdag                                |           |
|                                             | 3 onsdag                                |           |
|                                             | 4 torsdag                               |           |
|                                             | 5 fredag                                |           |
|                                             | 6 lördag                                |           |
|                                             | 7 söndag                                |           |
| season säsong/period                        | 1 januari-mars                          |           |
|                                             | 2 april-maj                             |           |
|                                             | 3 juni-augusti                          |           |
|                                             | 4 september-oktober                     |           |
|                                             | 5 november-december                     |           |
| bv2 belastning vs paoncil halva intervallet | 1 medelbelastning                       |           |
|                                             | 2 underbelastning                       |           |
|                                             | 3 överbelastning                        |           |
| holiday större helg                         | 1 ingen större helg                     |           |
|                                             | 2 större helg (påsk/midsommar/julonyår) |           |

## Categorical Variables Codings

|                                             |                                         | Parameter |
|---------------------------------------------|-----------------------------------------|-----------|
|                                             |                                         | (25)      |
|                                             | 502300005                               | ,000      |
|                                             | 502300006                               | ,000      |
|                                             | 502300007                               | ,000      |
|                                             | 502300214                               | ,000      |
|                                             | 502300411                               | ,000      |
|                                             | 502300415                               | ,000      |
|                                             | 502300416                               | ,000      |
|                                             | 502300811                               | ,000      |
|                                             | 502300913                               | ,000      |
| weekday veckodag                            | 1 måndag                                |           |
|                                             | 2 tisdag                                |           |
|                                             | 3 onsdag                                |           |
|                                             | 4 torsdag                               |           |
|                                             | 5 fredag                                |           |
|                                             | 6 lördag                                |           |
|                                             | 7 söndag                                |           |
| season säsong/period                        | 1 januari-mars                          |           |
|                                             | 2 april-maj                             |           |
|                                             | 3 juni-augusti                          |           |
|                                             | 4 september-oktober                     |           |
|                                             | 5 november-december                     |           |
| bv2 belastning vs paoncil halva intervallet | 1 medelbelastning                       |           |
|                                             | 2 underbelastning                       |           |
|                                             | 3 överbelastning                        |           |
| holiday större helg                         | 1 ingen större helg                     |           |
|                                             | 2 större helg (påsk/midsommar/julonyår) |           |

## Categorical Variables Codings

|                                             |                                         | Parameter |
|---------------------------------------------|-----------------------------------------|-----------|
|                                             |                                         | (26)      |
|                                             | 502300005                               | ,000      |
|                                             | 502300006                               | ,000      |
|                                             | 502300007                               | ,000      |
|                                             | 502300214                               | ,000      |
|                                             | 502300411                               | ,000      |
|                                             | 502300415                               | ,000      |
|                                             | 502300416                               | ,000      |
|                                             | 502300811                               | ,000      |
|                                             | 502300913                               | ,000      |
| weekday veckodag                            | 1 måndag                                |           |
|                                             | 2 tisdag                                |           |
|                                             | 3 onsdag                                |           |
|                                             | 4 torsdag                               |           |
|                                             | 5 fredag                                |           |
|                                             | 6 lördag                                |           |
|                                             | 7 söndag                                |           |
| season säsong/period                        | 1 januari-mars                          |           |
|                                             | 2 april-maj                             |           |
|                                             | 3 juni-augusti                          |           |
|                                             | 4 september-oktober                     |           |
|                                             | 5 november-december                     |           |
| bv2 belastning vs paoncil halva intervallet | 1 medelbelastning                       |           |
|                                             | 2 underbelastning                       |           |
|                                             | 3 överbelastning                        |           |
| holiday större helg                         | 1 ingen större helg                     |           |
|                                             | 2 större helg (påsk/midsommar/julonyår) |           |



## Categorical Variables Codings

|                                             |                                         | Parameter |
|---------------------------------------------|-----------------------------------------|-----------|
|                                             |                                         | (27)      |
|                                             | 502300005                               | 1,000     |
|                                             | 502300006                               | ,000      |
|                                             | 502300007                               | ,000      |
|                                             | 502300214                               | ,000      |
|                                             | 502300411                               | ,000      |
|                                             | 502300415                               | ,000      |
|                                             | 502300416                               | ,000      |
|                                             | 502300811                               | ,000      |
|                                             | 502300913                               | ,000      |
| weekday veckodag                            | 1 måndag                                |           |
|                                             | 2 tisdag                                |           |
|                                             | 3 onsdag                                |           |
|                                             | 4 torsdag                               |           |
|                                             | 5 fredag                                |           |
|                                             | 6 lördag                                |           |
|                                             | 7 söndag                                |           |
| season säsong/period                        | 1 januari-mars                          |           |
|                                             | 2 april-maj                             |           |
|                                             | 3 juni-augusti                          |           |
|                                             | 4 september-oktober                     |           |
|                                             | 5 november-december                     |           |
| bv2 belastning vs paoncil halva intervallet | 1 medelbelastning                       |           |
|                                             | 2 underbelastning                       |           |
|                                             | 3 överbelastning                        |           |
| holiday större helg                         | 1 ingen större helg                     |           |
|                                             | 2 större helg (påsk/midsommar/julonyår) |           |

## Categorical Variables Codings

|                                             |                                         | Parameter |
|---------------------------------------------|-----------------------------------------|-----------|
|                                             |                                         | (28)      |
|                                             | 502300005                               | ,000      |
|                                             | 502300006                               | 1,000     |
|                                             | 502300007                               | ,000      |
|                                             | 502300214                               | ,000      |
|                                             | 502300411                               | ,000      |
|                                             | 502300415                               | ,000      |
|                                             | 502300416                               | ,000      |
|                                             | 502300811                               | ,000      |
|                                             | 502300913                               | ,000      |
| weekday veckodag                            | 1 måndag                                |           |
|                                             | 2 tisdag                                |           |
|                                             | 3 onsdag                                |           |
|                                             | 4 torsdag                               |           |
|                                             | 5 fredag                                |           |
|                                             | 6 lördag                                |           |
|                                             | 7 söndag                                |           |
| season säsong/period                        | 1 januari-mars                          |           |
|                                             | 2 april-maj                             |           |
|                                             | 3 juni-augusti                          |           |
|                                             | 4 september-oktober                     |           |
|                                             | 5 november-december                     |           |
| bv2 belastning vs paoncil halva intervallet | 1 medelbelastning                       |           |
|                                             | 2 underbelastning                       |           |
|                                             | 3 överbelastning                        |           |
| holiday större helg                         | 1 ingen större helg                     |           |
|                                             | 2 större helg (påsk/midsommar/julonyår) |           |

## Categorical Variables Codings

|                                             |                                         | Parameter |
|---------------------------------------------|-----------------------------------------|-----------|
|                                             |                                         | (29)      |
|                                             | 502300005                               | ,000      |
|                                             | 502300006                               | ,000      |
|                                             | 502300007                               | 1,000     |
|                                             | 502300214                               | ,000      |
|                                             | 502300411                               | ,000      |
|                                             | 502300415                               | ,000      |
|                                             | 502300416                               | ,000      |
|                                             | 502300811                               | ,000      |
|                                             | 502300913                               | ,000      |
| weekday veckodag                            | 1 måndag                                |           |
|                                             | 2 tisdag                                |           |
|                                             | 3 onsdag                                |           |
|                                             | 4 torsdag                               |           |
|                                             | 5 fredag                                |           |
|                                             | 6 lördag                                |           |
|                                             | 7 söndag                                |           |
| season säsong/period                        | 1 januari-mars                          |           |
|                                             | 2 april-maj                             |           |
|                                             | 3 juni-augusti                          |           |
|                                             | 4 september-oktober                     |           |
|                                             | 5 november-december                     |           |
| bv2 belastning vs paoncil halva intervallet | 1 medelbelastning                       |           |
|                                             | 2 underbelastning                       |           |
|                                             | 3 överbelastning                        |           |
| holiday större helg                         | 1 ingen större helg                     |           |
|                                             | 2 större helg (påsk/midsommar/julonyår) |           |

## Categorical Variables Codings

|                                             |                                         | Parameter |
|---------------------------------------------|-----------------------------------------|-----------|
|                                             |                                         | (30)      |
|                                             | 502300005                               | ,000      |
|                                             | 502300006                               | ,000      |
|                                             | 502300007                               | ,000      |
|                                             | 502300214                               | 1,000     |
|                                             | 502300411                               | ,000      |
|                                             | 502300415                               | ,000      |
|                                             | 502300416                               | ,000      |
|                                             | 502300811                               | ,000      |
|                                             | 502300913                               | ,000      |
| weekday veckodag                            | 1 måndag                                |           |
|                                             | 2 tisdag                                |           |
|                                             | 3 onsdag                                |           |
|                                             | 4 torsdag                               |           |
|                                             | 5 fredag                                |           |
|                                             | 6 lördag                                |           |
|                                             | 7 söndag                                |           |
| season säsong/period                        | 1 januari-mars                          |           |
|                                             | 2 april-maj                             |           |
|                                             | 3 juni-augusti                          |           |
|                                             | 4 september-oktober                     |           |
|                                             | 5 november-december                     |           |
| bv2 belastning vs paoncil halva intervallet | 1 medelbelastning                       |           |
|                                             | 2 underbelastning                       |           |
|                                             | 3 överbelastning                        |           |
| holiday större helg                         | 1 ingen större helg                     |           |
|                                             | 2 större helg (påsk/midsommar/julonyår) |           |

## Categorical Variables Codings

|                                             |                                         | Parameter |
|---------------------------------------------|-----------------------------------------|-----------|
|                                             |                                         | (31)      |
|                                             | 502300005                               | ,000      |
|                                             | 502300006                               | ,000      |
|                                             | 502300007                               | ,000      |
|                                             | 502300214                               | ,000      |
|                                             | 502300411                               | 1,000     |
|                                             | 502300415                               | ,000      |
|                                             | 502300416                               | ,000      |
|                                             | 502300811                               | ,000      |
|                                             | 502300913                               | ,000      |
| weekday veckodag                            | 1 måndag                                |           |
|                                             | 2 tisdag                                |           |
|                                             | 3 onsdag                                |           |
|                                             | 4 torsdag                               |           |
|                                             | 5 fredag                                |           |
|                                             | 6 lördag                                |           |
|                                             | 7 söndag                                |           |
| season säsong/period                        | 1 januari-mars                          |           |
|                                             | 2 april-maj                             |           |
|                                             | 3 juni-augusti                          |           |
|                                             | 4 september-oktober                     |           |
|                                             | 5 november-december                     |           |
| bv2 belastning vs paoncil halva intervallet | 1 medelbelastning                       |           |
|                                             | 2 underbelastning                       |           |
|                                             | 3 överbelastning                        |           |
| holiday större helg                         | 1 ingen större helg                     |           |
|                                             | 2 större helg (påsk/midsommar/julonyår) |           |

## Categorical Variables Codings

|                                             |                                         | Parameter |
|---------------------------------------------|-----------------------------------------|-----------|
|                                             |                                         | (32)      |
|                                             | 502300005                               | ,000      |
|                                             | 502300006                               | ,000      |
|                                             | 502300007                               | ,000      |
|                                             | 502300214                               | ,000      |
|                                             | 502300411                               | ,000      |
|                                             | 502300415                               | 1,000     |
|                                             | 502300416                               | ,000      |
|                                             | 502300811                               | ,000      |
|                                             | 502300913                               | ,000      |
| weekday veckodag                            | 1 måndag                                |           |
|                                             | 2 tisdag                                |           |
|                                             | 3 onsdag                                |           |
|                                             | 4 torsdag                               |           |
|                                             | 5 fredag                                |           |
|                                             | 6 lördag                                |           |
|                                             | 7 söndag                                |           |
| season säsong/period                        | 1 januari-mars                          |           |
|                                             | 2 april-maj                             |           |
|                                             | 3 juni-augusti                          |           |
|                                             | 4 september-oktober                     |           |
|                                             | 5 november-december                     |           |
| bv2 belastning vs paoncil halva intervallet | 1 medelbelastning                       |           |
|                                             | 2 underbelastning                       |           |
|                                             | 3 överbelastning                        |           |
| holiday större helg                         | 1 ingen större helg                     |           |
|                                             | 2 större helg (påsk/midsommar/julonyår) |           |

## Categorical Variables Codings

|                                             |                                         | Parameter |
|---------------------------------------------|-----------------------------------------|-----------|
|                                             |                                         | (33)      |
|                                             | 502300005                               | ,000      |
|                                             | 502300006                               | ,000      |
|                                             | 502300007                               | ,000      |
|                                             | 502300214                               | ,000      |
|                                             | 502300411                               | ,000      |
|                                             | 502300415                               | ,000      |
|                                             | 502300416                               | 1,000     |
|                                             | 502300811                               | ,000      |
|                                             | 502300913                               | ,000      |
| weekday veckodag                            | 1 måndag                                |           |
|                                             | 2 tisdag                                |           |
|                                             | 3 onsdag                                |           |
|                                             | 4 torsdag                               |           |
|                                             | 5 fredag                                |           |
|                                             | 6 lördag                                |           |
|                                             | 7 söndag                                |           |
| season säsong/period                        | 1 januari-mars                          |           |
|                                             | 2 april-maj                             |           |
|                                             | 3 juni-augusti                          |           |
|                                             | 4 september-oktober                     |           |
|                                             | 5 november-december                     |           |
| bv2 belastning vs paoncil halva intervallet | 1 medelbelastning                       |           |
|                                             | 2 underbelastning                       |           |
|                                             | 3 överbelastning                        |           |
| holiday större helg                         | 1 ingen större helg                     |           |
|                                             | 2 större helg (påsk/midsommar/julonyår) |           |

## Categorical Variables Codings

|                                             |                                         | Parameter |
|---------------------------------------------|-----------------------------------------|-----------|
|                                             |                                         | (34)      |
|                                             | 502300005                               | ,000      |
|                                             | 502300006                               | ,000      |
|                                             | 502300007                               | ,000      |
|                                             | 502300214                               | ,000      |
|                                             | 502300411                               | ,000      |
|                                             | 502300415                               | ,000      |
|                                             | 502300416                               | ,000      |
|                                             | 502300811                               | 1,000     |
|                                             | 502300913                               | ,000      |
| weekday veckodag                            | 1 måndag                                |           |
|                                             | 2 tisdag                                |           |
|                                             | 3 onsdag                                |           |
|                                             | 4 torsdag                               |           |
|                                             | 5 fredag                                |           |
|                                             | 6 lördag                                |           |
|                                             | 7 söndag                                |           |
| season säsong/period                        | 1 januari-mars                          |           |
|                                             | 2 april-maj                             |           |
|                                             | 3 juni-augusti                          |           |
|                                             | 4 september-oktober                     |           |
|                                             | 5 november-december                     |           |
| bv2 belastning vs paoncil halva intervallet | 1 medelbelastning                       |           |
|                                             | 2 underbelastning                       |           |
|                                             | 3 överbelastning                        |           |
| holiday större helg                         | 1 ingen större helg                     |           |
|                                             | 2 större helg (påsk/midsommar/julonyår) |           |



**Categorical Variables Codings**

|                                             |                                         | Paramete... |
|---------------------------------------------|-----------------------------------------|-------------|
|                                             |                                         | (35)        |
|                                             | 502300005                               | ,000        |
|                                             | 502300006                               | ,000        |
|                                             | 502300007                               | ,000        |
|                                             | 502300214                               | ,000        |
|                                             | 502300411                               | ,000        |
|                                             | 502300415                               | ,000        |
|                                             | 502300416                               | ,000        |
|                                             | 502300811                               | ,000        |
|                                             | 502300913                               | 1,000       |
| weekday veckodag                            | 1 måndag                                |             |
|                                             | 2 tisdag                                |             |
|                                             | 3 onsdag                                |             |
|                                             | 4 torsdag                               |             |
|                                             | 5 fredag                                |             |
|                                             | 6 lördag                                |             |
|                                             | 7 söndag                                |             |
| season säsong/period                        | 1 januari-mars                          |             |
|                                             | 2 april-maj                             |             |
|                                             | 3 juni-augusti                          |             |
|                                             | 4 september-oktober                     |             |
|                                             | 5 november-december                     |             |
| bv2 belastning vs paoncil halva intervallet | 1 medelbelastning                       |             |
|                                             | 2 underbelastning                       |             |
|                                             | 3 överbelastning                        |             |
| holiday större helg                         | 1 ingen större helg                     |             |
|                                             | 2 större helg (påsk/midsommar/julonyår) |             |

**Block 0: Beginning Block**

**Classification Table<sup>a,b</sup>**

| Observed           |                                                    |                                                              |
|--------------------|----------------------------------------------------|--------------------------------------------------------------|
| Step 0             | seurauslt3 seuraus highest = haitta (i någon form) | 0 ingen händelse eller ei haittaa<br>1 haitta (i någon form) |
| Overall Percentage |                                                    |                                                              |

Classification Table<sup>a,b</sup>

| Observed           |                                                    | Predicted                         |                                   |
|--------------------|----------------------------------------------------|-----------------------------------|-----------------------------------|
|                    |                                                    | seurauslt3 seuraus highest        | 0 ingen händelse eller ei haittaa |
| Step 0             | seurauslt3 seuraus highest = haitta (i någon form) | 0 ingen händelse eller ei haittaa | 12075                             |
|                    |                                                    | 1 haitta (i någon form)           | 400                               |
| Overall Percentage |                                                    |                                   |                                   |

Classification Table<sup>a,b</sup>

| Observed           |                                                    | Predicted                         |                         |
|--------------------|----------------------------------------------------|-----------------------------------|-------------------------|
|                    |                                                    | seurauslt3 seuraus highest ..     | 1 haitta (i någon form) |
| Step 0             | seurauslt3 seuraus highest = haitta (i någon form) | 0 ingen händelse eller ei haittaa | 0                       |
|                    |                                                    | 1 haitta (i någon form)           | 0                       |
| Overall Percentage |                                                    |                                   |                         |

Classification Table<sup>a,b</sup>

| Observed           |                                                    | Predicted                         |       |
|--------------------|----------------------------------------------------|-----------------------------------|-------|
|                    |                                                    | Percentage Correct                |       |
| Step 0             | seurauslt3 seuraus highest = haitta (i någon form) | 0 ingen händelse eller ei haittaa | 100,0 |
|                    |                                                    | 1 haitta (i någon form)           | ,0    |
| Overall Percentage |                                                    |                                   | 96,8  |

a. Constant is included in the model.

b. The cut value is ,500

Variables in the Equation

|                 | B      | S.E. | Wald     | df | Sig. | Exp(B) |
|-----------------|--------|------|----------|----|------|--------|
| Step 0 Constant | -3,407 | ,051 | 4495,313 | 1  | ,000 | ,033   |

## Variables not in the Equation

|        |           |            | Score   | df | Sig. |
|--------|-----------|------------|---------|----|------|
| Step 0 | Variables | bv2        | 10,042  | 2  | ,007 |
|        |           | bv2(1)     | 8,044   | 1  | ,005 |
|        |           | bv2(2)     | 8,351   | 1  | ,004 |
|        |           | VASTY2     | 321,056 | 35 | ,000 |
|        |           | VASTY2(1)  | 1,769   | 1  | ,184 |
|        |           | VASTY2(2)  | 27,206  | 1  | ,000 |
|        |           | VASTY2(3)  | 8,562   | 1  | ,003 |
|        |           | VASTY2(4)  | ,988    | 1  | ,320 |
|        |           | VASTY2(5)  | ,587    | 1  | ,444 |
|        |           | VASTY2(6)  | 8,528   | 1  | ,003 |
|        |           | VASTY2(7)  | 2,666   | 1  | ,103 |
|        |           | VASTY2(8)  | ,008    | 1  | ,929 |
|        |           | VASTY2(9)  | 19,221  | 1  | ,000 |
|        |           | VASTY2(10) | 58,192  | 1  | ,000 |
|        |           | VASTY2(11) | 21,278  | 1  | ,000 |
|        |           | VASTY2(12) | 2,551   | 1  | ,110 |
|        |           | VASTY2(13) | 62,883  | 1  | ,000 |
|        |           | VASTY2(14) | ,045    | 1  | ,832 |
|        |           | VASTY2(15) | 8,562   | 1  | ,003 |
|        |           | VASTY2(16) | 1,322   | 1  | ,250 |
|        |           | VASTY2(17) | 2,012   | 1  | ,156 |
|        |           | VASTY2(18) | 6,791   | 1  | ,009 |
|        |           | VASTY2(19) | 10,418  | 1  | ,001 |
|        |           | VASTY2(20) | ,662    | 1  | ,416 |
|        |           | VASTY2(21) | 8,562   | 1  | ,003 |
|        |           | VASTY2(22) | 5,396   | 1  | ,020 |
|        |           | VASTY2(23) | ,045    | 1  | ,832 |
|        |           | VASTY2(24) | 5,427   | 1  | ,020 |
|        |           | VASTY2(25) | 6,092   | 1  | ,014 |
|        |           | VASTY2(26) | 7,868   | 1  | ,005 |
|        |           | VASTY2(27) | 5,427   | 1  | ,020 |
|        |           | VASTY2(28) | ,715    | 1  | ,398 |
|        |           | VASTY2(29) | 2,983   | 1  | ,084 |
|        |           | VASTY2(30) | 2,034   | 1  | ,154 |
|        |           | VASTY2(31) | 30,255  | 1  | ,000 |
|        |           | VASTY2(32) | 1,902   | 1  | ,168 |
|        |           | VASTY2(33) | 1,968   | 1  | ,161 |
|        |           | VASTY2(34) | 6,856   | 1  | ,009 |
|        |           | VASTY2(35) | ,127    | 1  | ,722 |
|        |           | weekday    | 12,260  | 6  | ,056 |
|        |           | weekday(1) | 2,946   | 1  | ,086 |
|        |           | weekday(2) | ,062    | 1  | ,804 |
|        |           | weekday(3) | ,254    | 1  | ,615 |

## Variables not in the Equation

|                    | Score   | df | Sig. |
|--------------------|---------|----|------|
| weekday(4)         | 2,864   | 1  | ,091 |
| weekday(5)         | ,463    | 1  | ,496 |
| weekday(6)         | 7,621   | 1  | ,006 |
| holiday(1)         | 1,875   | 1  | ,171 |
| season             | 11,711  | 4  | ,020 |
| season(1)          | ,494    | 1  | ,482 |
| season(2)          | ,040    | 1  | ,842 |
| season(3)          | 3,188   | 1  | ,074 |
| season(4)          | 8,641   | 1  | ,003 |
| Overall Statistics | 349,485 | 48 | ,000 |

## Block 1: Method = Enter

## Omnibus Tests of Model Coefficients

|             | Chi-square | df | Sig. |
|-------------|------------|----|------|
| Step 1 Step | 326,097    | 48 | ,000 |
| Block       | 326,097    | 48 | ,000 |
| Model       | 326,097    | 48 | ,000 |

## Model Summary

| Step | -2 Log likelihood     | Cox & Snell R Square | Nagelkerke R Square |
|------|-----------------------|----------------------|---------------------|
| 1    | 3212,951 <sup>a</sup> | ,026                 | ,104                |

a. Estimation terminated at iteration number 9 because parameter estimates changed by less than ,001.

Classification Table<sup>a</sup>

| Observed           |                                                    |                                                              |
|--------------------|----------------------------------------------------|--------------------------------------------------------------|
| Step 1             | seurauslt3 seuraus highest = haitta (i någon form) | 0 ingen händelse eller ei haittaa<br>1 haitta (i någon form) |
| Overall Percentage |                                                    |                                                              |

Classification Table<sup>a</sup>

|                    |                                                    | Predicted                         |                                   |
|--------------------|----------------------------------------------------|-----------------------------------|-----------------------------------|
|                    |                                                    | seurauslt3 seuraus highest        | 0 ingen händelse eller ei haittaa |
|                    | Observed                                           |                                   |                                   |
| Step 1             | seurauslt3 seuraus highest = haitta (i någon form) | 0 ingen händelse eller ei haittaa | 12075                             |
|                    |                                                    | 1 haitta (i någon form)           | 400                               |
| Overall Percentage |                                                    |                                   |                                   |

Classification Table<sup>a</sup>

|                    |                                                    | Predicted                         |                         |
|--------------------|----------------------------------------------------|-----------------------------------|-------------------------|
|                    |                                                    | seurauslt3 seuraus highest ..     | 1 haitta (i någon form) |
|                    | Observed                                           |                                   |                         |
| Step 1             | seurauslt3 seuraus highest = haitta (i någon form) | 0 ingen händelse eller ei haittaa | 0                       |
|                    |                                                    | 1 haitta (i någon form)           | 0                       |
| Overall Percentage |                                                    |                                   |                         |

Classification Table<sup>a</sup>

|                    |                                                    | Predicted                         |       |
|--------------------|----------------------------------------------------|-----------------------------------|-------|
|                    |                                                    | Percentage Correct                |       |
|                    | Observed                                           |                                   |       |
| Step 1             | seurauslt3 seuraus highest = haitta (i någon form) | 0 ingen händelse eller ei haittaa | 100,0 |
|                    |                                                    | 1 haitta (i någon form)           | ,0    |
| Overall Percentage |                                                    |                                   | 96,8  |

a. The cut value is ,500

## Variables in the Equation

|                     |            | B      | S.E.  | Wald    | df | Sig. | Exp(B) |
|---------------------|------------|--------|-------|---------|----|------|--------|
| Step 1 <sup>a</sup> | bv2        |        |       | 1,141   | 2  | ,565 |        |
|                     | bv2(1)     | ,047   | ,150  | ,100    | 1  | ,752 | 1,049  |
|                     | bv2(2)     | ,138   | ,136  | 1,025   | 1  | ,311 | 1,148  |
|                     | VASTY2     |        |       | 230,166 | 35 | ,000 |        |
|                     | VASTY2(1)  | ,595   | ,424  | 1,971   | 1  | ,160 | 1,814  |
|                     | VASTY2(2)  | 1,221  | ,390  | 9,800   | 1  | ,002 | 3,390  |
|                     | VASTY2(3)  | -1,577 | ,788  | 4,009   | 1  | ,045 | ,207   |
|                     | VASTY2(4)  | ,487   | ,431  | 1,274   | 1  | ,259 | 1,627  |
|                     | VASTY2(5)  | ,463   | ,442  | 1,101   | 1  | ,294 | 1,590  |
|                     | VASTY2(6)  | -1,556 | ,786  | 3,916   | 1  | ,048 | ,211   |
|                     | VASTY2(7)  | ,606   | ,424  | 2,043   | 1  | ,153 | 1,834  |
|                     | VASTY2(8)  | ,272   | ,449  | ,367    | 1  | ,545 | 1,312  |
|                     | VASTY2(9)  | 1,114  | ,398  | 7,820   | 1  | ,005 | 3,047  |
|                     | VASTY2(10) | 1,486  | ,381  | 15,215  | 1  | ,000 | 4,418  |
|                     | VASTY2(11) | 1,139  | ,393  | 8,399   | 1  | ,004 | 3,125  |
|                     | VASTY2(12) | ,641   | ,421  | 2,326   | 1  | ,127 | 1,899  |
|                     | VASTY2(13) | 1,482  | ,383  | 14,951  | 1  | ,000 | 4,404  |
|                     | VASTY2(14) | ,176   | ,457  | ,148    | 1  | ,701 | 1,192  |
|                     | VASTY2(15) | -1,551 | ,786  | 3,892   | 1  | ,049 | ,212   |
|                     | VASTY2(16) | -,515  | ,675  | ,582    | 1  | ,445 | ,598   |
|                     | VASTY2(17) | -,266  | ,510  | ,271    | 1  | ,602 | ,767   |
|                     | VASTY2(18) | -1,125 | ,671  | 2,807   | 1  | ,094 | ,325   |
|                     | VASTY2(19) | -2,212 | 1,059 | 4,364   | 1  | ,037 | ,109   |
|                     | VASTY2(20) | ,442   | ,450  | ,966    | 1  | ,326 | 1,556  |
|                     | VASTY2(21) | -1,543 | ,786  | 3,857   | 1  | ,050 | ,214   |
|                     | VASTY2(22) | -,807  | ,607  | 1,770   | 1  | ,183 | ,446   |
|                     | VASTY2(23) | ,190   | ,456  | ,173    | 1  | ,678 | 1,209  |
|                     | VASTY2(24) | -,886  | ,607  | 2,127   | 1  | ,145 | ,412   |
|                     | VASTY2(25) | -1,337 | ,786  | 2,890   | 1  | ,089 | ,263   |
|                     | VASTY2(26) | -2,061 | 1,058 | 3,795   | 1  | ,051 | ,127   |
|                     | VASTY2(27) | -,883  | ,607  | 2,113   | 1  | ,146 | ,414   |
|                     | VASTY2(28) | -,137  | ,567  | ,058    | 1  | ,809 | ,872   |
|                     | VASTY2(29) | -,448  | ,533  | ,707    | 1  | ,400 | ,639   |
|                     | VASTY2(30) | -,289  | ,510  | ,322    | 1  | ,571 | ,749   |
|                     | VASTY2(31) | 1,224  | ,389  | 9,888   | 1  | ,002 | 3,399  |
|                     | VASTY2(32) | -,272  | ,511  | ,283    | 1  | ,595 | ,762   |
|                     | VASTY2(33) | -,282  | ,510  | ,304    | 1  | ,581 | ,755   |
|                     | VASTY2(34) | -1,142 | ,671  | 2,894   | 1  | ,089 | ,319   |
|                     | VASTY2(35) | ,074   | ,481  | ,024    | 1  | ,878 | 1,077  |
|                     | weekday    |        |       | 12,613  | 6  | ,050 |        |
|                     | weekday(1) | ,227   | ,185  | 1,495   | 1  | ,221 | 1,254  |
|                     | weekday(2) | -,013  | ,195  | ,005    | 1  | ,946 | ,987   |

Variables in the Equation

|                     |            | 95% C.I. for EXP(B) |       |
|---------------------|------------|---------------------|-------|
|                     |            | Lower               | Upper |
| Step 1 <sup>a</sup> | bv2        |                     |       |
|                     | bv2(1)     | ,781                | 1,407 |
|                     | bv2(2)     | ,879                | 1,499 |
|                     | VASTY2     |                     |       |
|                     | VASTY2(1)  | ,790                | 4,164 |
|                     | VASTY2(2)  | 1,579               | 7,280 |
|                     | VASTY2(3)  | ,044                | ,967  |
|                     | VASTY2(4)  | ,699                | 3,788 |
|                     | VASTY2(5)  | ,669                | 3,779 |
|                     | VASTY2(6)  | ,045                | ,985  |
|                     | VASTY2(7)  | ,798                | 4,211 |
|                     | VASTY2(8)  | ,544                | 3,163 |
|                     | VASTY2(9)  | 1,396               | 6,652 |
|                     | VASTY2(10) | 2,094               | 9,322 |
|                     | VASTY2(11) | 1,446               | 6,753 |
|                     | VASTY2(12) | ,833                | 4,330 |
|                     | VASTY2(13) | 2,077               | 9,336 |
|                     | VASTY2(14) | ,486                | 2,921 |
|                     | VASTY2(15) | ,045                | ,990  |
|                     | VASTY2(16) | ,159                | 2,242 |
|                     | VASTY2(17) | ,282                | 2,084 |
|                     | VASTY2(18) | ,087                | 1,210 |
|                     | VASTY2(19) | ,014                | ,872  |
|                     | VASTY2(20) | ,644                | 3,760 |
|                     | VASTY2(21) | ,046                | ,997  |
|                     | VASTY2(22) | ,136                | 1,465 |
|                     | VASTY2(23) | ,494                | 2,956 |
|                     | VASTY2(24) | ,125                | 1,356 |
|                     | VASTY2(25) | ,056                | 1,227 |
|                     | VASTY2(26) | ,016                | 1,013 |
|                     | VASTY2(27) | ,126                | 1,360 |
|                     | VASTY2(28) | ,287                | 2,652 |
|                     | VASTY2(29) | ,225                | 1,816 |
|                     | VASTY2(30) | ,275                | 2,035 |
|                     | VASTY2(31) | 1,586               | 7,289 |
|                     | VASTY2(32) | ,280                | 2,073 |
|                     | VASTY2(33) | ,278                | 2,052 |
|                     | VASTY2(34) | ,086                | 1,190 |
|                     | VASTY2(35) | ,420                | 2,763 |
|                     | weekday    |                     |       |
|                     | weekday(1) | ,872                | 1,803 |
|                     | weekday(2) | ,674                | 1,446 |

review only

Variables in the Equation

|            | B      | S.E. | Wald   | df | Sig. | Exp(B) |
|------------|--------|------|--------|----|------|--------|
| weekday(3) | ,080   | ,191 | ,173   | 1  | ,677 | 1,083  |
| weekday(4) | ,235   | ,186 | 1,591  | 1  | ,207 | 1,264  |
| weekday(5) | -,063  | ,200 | ,098   | 1  | ,754 | ,939   |
| weekday(6) | -,409  | ,217 | 3,534  | 1  | ,060 | ,665   |
| holiday(1) | -,478  | ,373 | 1,648  | 1  | ,199 | ,620   |
| season     |        |      | 10,322 | 4  | ,035 |        |
| season(1)  | -,210  | ,162 | 1,675  | 1  | ,196 | ,811   |
| season(2)  | -,107  | ,146 | ,534   | 1  | ,465 | ,899   |
| season(3)  | ,067   | ,150 | ,196   | 1  | ,658 | 1,069  |
| season(4)  | -,488  | ,181 | 7,301  | 1  | ,007 | ,614   |
| Constant   | -3,625 | ,382 | 90,231 | 1  | ,000 | ,027   |

Variables in the Equation

|            | 95% C.I. for EXP(B) |       |
|------------|---------------------|-------|
|            | Lower               | Upper |
| weekday(3) | ,745                | 1,574 |
| weekday(4) | ,878                | 1,820 |
| weekday(5) | ,635                | 1,390 |
| weekday(6) | ,434                | 1,018 |
| holiday(1) | ,299                | 1,287 |
| season     |                     |       |
| season(1)  | ,590                | 1,114 |
| season(2)  | ,675                | 1,197 |
| season(3)  | ,796                | 1,435 |
| season(4)  | ,431                | ,875  |
| Constant   |                     |       |

a. Variable(s) entered on step 1: bv2, VASTY2, weekday, holiday, season.

```
LOGISTIC REGRESSION VARIABLES seurauslt3
/METHOD=ENTER bv3 VASTY2 weekday holiday season
/CONTRAST (bv3)=Indicator(1)
/CONTRAST (VASTY2)=Indicator(1)
/CONTRAST (weekday)=Indicator(1)
/CONTRAST (holiday)=Indicator(1)
/CONTRAST (season)=Indicator(1)
/PRINT=CI(95)
/CRITERIA=PIN(0.05) POUT(0.10) ITERATE(20) CUT(0.5).
```

## Logistic Regression

[DataSet6] C:\cWordjan\Rafaela\_VCS\alla\_tillsammans\abo\_bjo\_vasa\_v1.sav



**Case Processing Summary**

| Unweighted Cases <sup>a</sup> |                      | N     | Percent |
|-------------------------------|----------------------|-------|---------|
| Selected Cases                | Included in Analysis | 12475 | 100,0   |
|                               | Missing Cases        | 0     | ,0      |
|                               | Total                | 12475 | 100,0   |
| Unselected Cases              |                      | 0     | ,0      |
| Total                         |                      | 12475 | 100,0   |

a. If weight is in effect, see classification table for the total number of cases.

**Dependent Variable Encoding**

| Original Value                    | Internal Value |
|-----------------------------------|----------------|
| 0 ingen händelse eller ei haittaa | 0              |
| 1 haitta (i någon form)           | 1              |

**Categorical Variables Codings**

|                           | Frequency |
|---------------------------|-----------|
| VASTY2 (SAIR*10000)+VASTY | 365       |
| 403073101                 | 362       |
| 403073102                 | 365       |
| 403073103                 | 365       |
| 403073202                 | 365       |
| 403073203                 | 365       |
| 403073204                 | 330       |
| 403073303                 | 364       |
| 403073651                 | 362       |
| 403073771                 | 365       |
| 403133102                 | 341       |
| 403133106                 | 365       |
| 403133107                 | 365       |
| 403133109                 | 365       |
| 403133202                 | 365       |
| 403133203                 | 365       |
| 403133204                 | 365       |
| 403133315                 | 177       |
| 403133322                 | 365       |
| 403133401                 | 362       |
| 403133402                 | 365       |
| 403133550                 | 298       |
| 403133772                 | 365       |
| 403135803                 | 365       |
| 404060001                 | 365       |
| 404060002                 | 366       |
| 404310003                 | 291       |
| 404310004                 | 291       |

## Categorical Variables Codings

|                           |           | Parameter |
|---------------------------|-----------|-----------|
|                           |           | (1)       |
| VASTY2 (SAIR*10000)+VASTY | 403073101 | ,000      |
|                           | 403073102 | 1,000     |
|                           | 403073103 | ,000      |
|                           | 403073202 | ,000      |
|                           | 403073203 | ,000      |
|                           | 403073204 | ,000      |
|                           | 403073303 | ,000      |
|                           | 403073651 | ,000      |
|                           | 403073771 | ,000      |
|                           | 403133102 | ,000      |
|                           | 403133106 | ,000      |
|                           | 403133107 | ,000      |
|                           | 403133109 | ,000      |
|                           | 403133202 | ,000      |
|                           | 403133203 | ,000      |
|                           | 403133204 | ,000      |
|                           | 403133315 | ,000      |
|                           | 403133322 | ,000      |
|                           | 403133401 | ,000      |
|                           | 403133402 | ,000      |
|                           | 403133550 | ,000      |
|                           | 403133772 | ,000      |
|                           | 403135803 | ,000      |
|                           | 404060001 | ,000      |
|                           | 404060002 | ,000      |
|                           | 404310003 | ,000      |
|                           | 404310004 | ,000      |

1  
2  
3  
4  
5  
6  
7  
8  
9  
10  
11  
12  
13  
14  
15  
16  
17  
18  
19  
20  
21  
22  
23  
24  
25  
26  
27  
28  
29  
30  
31  
32  
33  
34  
35  
36  
37  
38  
39  
40  
41  
42  
43  
44  
45  
46  
47  
48  
49  
50  
51  
52  
53  
54  
55  
56  
57  
58  
59  
60

**Categorical Variables Codings**

|                           |           | Parameter |
|---------------------------|-----------|-----------|
|                           |           | (2)       |
| VASTY2 (SAIR*10000)+VASTY | 403073101 | ,000      |
|                           | 403073102 | ,000      |
|                           | 403073103 | 1,000     |
|                           | 403073202 | ,000      |
|                           | 403073203 | ,000      |
|                           | 403073204 | ,000      |
|                           | 403073303 | ,000      |
|                           | 403073651 | ,000      |
|                           | 403073771 | ,000      |
|                           | 403133102 | ,000      |
|                           | 403133106 | ,000      |
|                           | 403133107 | ,000      |
|                           | 403133109 | ,000      |
|                           | 403133202 | ,000      |
|                           | 403133203 | ,000      |
|                           | 403133204 | ,000      |
|                           | 403133315 | ,000      |
|                           | 403133322 | ,000      |
|                           | 403133401 | ,000      |
|                           | 403133402 | ,000      |
|                           | 403133550 | ,000      |
|                           | 403133772 | ,000      |
|                           | 403135803 | ,000      |
|                           | 404060001 | ,000      |
|                           | 404060002 | ,000      |
|                           | 404310003 | ,000      |
|                           | 404310004 | ,000      |

BMJ

## Categorical Variables Codings

|                           |           | Parameter |
|---------------------------|-----------|-----------|
|                           |           | (3)       |
| VASTY2 (SAIR*10000)+VASTY | 403073101 | ,000      |
|                           | 403073102 | ,000      |
|                           | 403073103 | ,000      |
|                           | 403073202 | 1,000     |
|                           | 403073203 | ,000      |
|                           | 403073204 | ,000      |
|                           | 403073303 | ,000      |
|                           | 403073651 | ,000      |
|                           | 403073771 | ,000      |
|                           | 403133102 | ,000      |
|                           | 403133106 | ,000      |
|                           | 403133107 | ,000      |
|                           | 403133109 | ,000      |
|                           | 403133202 | ,000      |
|                           | 403133203 | ,000      |
|                           | 403133204 | ,000      |
|                           | 403133315 | ,000      |
|                           | 403133322 | ,000      |
|                           | 403133401 | ,000      |
|                           | 403133402 | ,000      |
|                           | 403133550 | ,000      |
|                           | 403133772 | ,000      |
|                           | 403135803 | ,000      |
|                           | 404060001 | ,000      |
|                           | 404060002 | ,000      |
|                           | 404310003 | ,000      |
|                           | 404310004 | ,000      |

1  
2  
3  
4  
5  
6  
7  
8  
9  
10  
11  
12  
13  
14  
15  
16  
17  
18  
19  
20  
21  
22  
23  
24  
25  
26  
27  
28  
29  
30  
31  
32  
33  
34  
35  
36  
37  
38  
39  
40  
41  
42  
43  
44  
45  
46  
47  
48  
49  
50  
51  
52  
53  
54  
55  
56  
57  
58  
59  
60

**Categorical Variables Codings**

|                           |           | Parameter |
|---------------------------|-----------|-----------|
|                           |           | (4)       |
| VASTY2 (SAIR*10000)+VASTY | 403073101 | ,000      |
|                           | 403073102 | ,000      |
|                           | 403073103 | ,000      |
|                           | 403073202 | ,000      |
|                           | 403073203 | 1,000     |
|                           | 403073204 | ,000      |
|                           | 403073303 | ,000      |
|                           | 403073651 | ,000      |
|                           | 403073771 | ,000      |
|                           | 403133102 | ,000      |
|                           | 403133106 | ,000      |
|                           | 403133107 | ,000      |
|                           | 403133109 | ,000      |
|                           | 403133202 | ,000      |
|                           | 403133203 | ,000      |
|                           | 403133204 | ,000      |
|                           | 403133315 | ,000      |
|                           | 403133322 | ,000      |
|                           | 403133401 | ,000      |
|                           | 403133402 | ,000      |
|                           | 403133550 | ,000      |
|                           | 403133772 | ,000      |
|                           | 403135803 | ,000      |
|                           | 404060001 | ,000      |
|                           | 404060002 | ,000      |
|                           | 404310003 | ,000      |
|                           | 404310004 | ,000      |

BMJ

## Categorical Variables Codings

|                           |           | Parameter |
|---------------------------|-----------|-----------|
|                           |           | (5)       |
| VASTY2 (SAIR*10000)+VASTY | 403073101 | ,000      |
|                           | 403073102 | ,000      |
|                           | 403073103 | ,000      |
|                           | 403073202 | ,000      |
|                           | 403073203 | ,000      |
|                           | 403073204 | 1,000     |
|                           | 403073303 | ,000      |
|                           | 403073651 | ,000      |
|                           | 403073771 | ,000      |
|                           | 403133102 | ,000      |
|                           | 403133106 | ,000      |
|                           | 403133107 | ,000      |
|                           | 403133109 | ,000      |
|                           | 403133202 | ,000      |
|                           | 403133203 | ,000      |
|                           | 403133204 | ,000      |
|                           | 403133315 | ,000      |
|                           | 403133322 | ,000      |
|                           | 403133401 | ,000      |
|                           | 403133402 | ,000      |
|                           | 403133550 | ,000      |
|                           | 403133772 | ,000      |
|                           | 403135803 | ,000      |
|                           | 404060001 | ,000      |
|                           | 404060002 | ,000      |
|                           | 404310003 | ,000      |
|                           | 404310004 | ,000      |

## Categorical Variables Codings

|                           |           | Parameter |
|---------------------------|-----------|-----------|
|                           |           | (6)       |
| VASTY2 (SAIR*10000)+VASTY | 403073101 | ,000      |
|                           | 403073102 | ,000      |
|                           | 403073103 | ,000      |
|                           | 403073202 | ,000      |
|                           | 403073203 | ,000      |
|                           | 403073204 | ,000      |
|                           | 403073303 | 1,000     |
|                           | 403073651 | ,000      |
|                           | 403073771 | ,000      |
|                           | 403133102 | ,000      |
|                           | 403133106 | ,000      |
|                           | 403133107 | ,000      |
|                           | 403133109 | ,000      |
|                           | 403133202 | ,000      |
|                           | 403133203 | ,000      |
|                           | 403133204 | ,000      |
|                           | 403133315 | ,000      |
|                           | 403133322 | ,000      |
|                           | 403133401 | ,000      |
|                           | 403133402 | ,000      |
|                           | 403133550 | ,000      |
|                           | 403133772 | ,000      |
|                           | 403135803 | ,000      |
|                           | 404060001 | ,000      |
|                           | 404060002 | ,000      |
|                           | 404310003 | ,000      |
|                           | 404310004 | ,000      |

## Categorical Variables Codings

|                           |           | Parameter |
|---------------------------|-----------|-----------|
|                           |           | (7)       |
| VASTY2 (SAIR*10000)+VASTY | 403073101 | ,000      |
|                           | 403073102 | ,000      |
|                           | 403073103 | ,000      |
|                           | 403073202 | ,000      |
|                           | 403073203 | ,000      |
|                           | 403073204 | ,000      |
|                           | 403073303 | ,000      |
|                           | 403073651 | 1,000     |
|                           | 403073771 | ,000      |
|                           | 403133102 | ,000      |
|                           | 403133106 | ,000      |
|                           | 403133107 | ,000      |
|                           | 403133109 | ,000      |
|                           | 403133202 | ,000      |
|                           | 403133203 | ,000      |
|                           | 403133204 | ,000      |
|                           | 403133315 | ,000      |
|                           | 403133322 | ,000      |
|                           | 403133401 | ,000      |
|                           | 403133402 | ,000      |
|                           | 403133550 | ,000      |
|                           | 403133772 | ,000      |
|                           | 403135803 | ,000      |
|                           | 404060001 | ,000      |
|                           | 404060002 | ,000      |
|                           | 404310003 | ,000      |
|                           | 404310004 | ,000      |



1  
2  
3  
4  
5  
6  
7  
8  
9  
10  
11  
12  
13  
14  
15  
16  
17  
18  
19  
20  
21  
22  
23  
24  
25  
26  
27  
28  
29  
30  
31  
32  
33  
34  
35  
36  
37  
38  
39  
40  
41  
42  
43  
44  
45  
46  
47  
48  
49  
50  
51  
52  
53  
54  
55  
56  
57  
58  
59  
60

**Categorical Variables Codings**

|                           |           | Parameter |
|---------------------------|-----------|-----------|
|                           |           | (8)       |
| VASTY2 (SAIR*10000)+VASTY | 403073101 | ,000      |
|                           | 403073102 | ,000      |
|                           | 403073103 | ,000      |
|                           | 403073202 | ,000      |
|                           | 403073203 | ,000      |
|                           | 403073204 | ,000      |
|                           | 403073303 | ,000      |
|                           | 403073651 | ,000      |
|                           | 403073771 | 1,000     |
|                           | 403133102 | ,000      |
|                           | 403133106 | ,000      |
|                           | 403133107 | ,000      |
|                           | 403133109 | ,000      |
|                           | 403133202 | ,000      |
|                           | 403133203 | ,000      |
|                           | 403133204 | ,000      |
|                           | 403133315 | ,000      |
|                           | 403133322 | ,000      |
|                           | 403133401 | ,000      |
|                           | 403133402 | ,000      |
|                           | 403133550 | ,000      |
|                           | 403133772 | ,000      |
|                           | 403135803 | ,000      |
|                           | 404060001 | ,000      |
|                           | 404060002 | ,000      |
|                           | 404310003 | ,000      |
|                           | 404310004 | ,000      |

BMJ

## Categorical Variables Codings

|                           |           | Parameter |
|---------------------------|-----------|-----------|
|                           |           | (9)       |
| VASTY2 (SAIR*10000)+VASTY | 403073101 | ,000      |
|                           | 403073102 | ,000      |
|                           | 403073103 | ,000      |
|                           | 403073202 | ,000      |
|                           | 403073203 | ,000      |
|                           | 403073204 | ,000      |
|                           | 403073303 | ,000      |
|                           | 403073651 | ,000      |
|                           | 403073771 | ,000      |
|                           | 403133102 | 1,000     |
|                           | 403133106 | ,000      |
|                           | 403133107 | ,000      |
|                           | 403133109 | ,000      |
|                           | 403133202 | ,000      |
|                           | 403133203 | ,000      |
|                           | 403133204 | ,000      |
|                           | 403133315 | ,000      |
|                           | 403133322 | ,000      |
|                           | 403133401 | ,000      |
|                           | 403133402 | ,000      |
|                           | 403133550 | ,000      |
|                           | 403133772 | ,000      |
|                           | 403135803 | ,000      |
|                           | 404060001 | ,000      |
|                           | 404060002 | ,000      |
|                           | 404310003 | ,000      |
|                           | 404310004 | ,000      |

## Categorical Variables Codings

|                           |           | Parameter |
|---------------------------|-----------|-----------|
|                           |           | (10)      |
| VASTY2 (SAIR*10000)+VASTY | 403073101 | ,000      |
|                           | 403073102 | ,000      |
|                           | 403073103 | ,000      |
|                           | 403073202 | ,000      |
|                           | 403073203 | ,000      |
|                           | 403073204 | ,000      |
|                           | 403073303 | ,000      |
|                           | 403073651 | ,000      |
|                           | 403073771 | ,000      |
|                           | 403133102 | ,000      |
|                           | 403133106 | 1,000     |
|                           | 403133107 | ,000      |
|                           | 403133109 | ,000      |
|                           | 403133202 | ,000      |
|                           | 403133203 | ,000      |
|                           | 403133204 | ,000      |
|                           | 403133315 | ,000      |
|                           | 403133322 | ,000      |
|                           | 403133401 | ,000      |
|                           | 403133402 | ,000      |
|                           | 403133550 | ,000      |
|                           | 403133772 | ,000      |
|                           | 403135803 | ,000      |
|                           | 404060001 | ,000      |
|                           | 404060002 | ,000      |
|                           | 404310003 | ,000      |
|                           | 404310004 | ,000      |

## Categorical Variables Codings

|                           |           | Parameter |
|---------------------------|-----------|-----------|
|                           |           | (11)      |
| VASTY2 (SAIR*10000)+VASTY | 403073101 | ,000      |
|                           | 403073102 | ,000      |
|                           | 403073103 | ,000      |
|                           | 403073202 | ,000      |
|                           | 403073203 | ,000      |
|                           | 403073204 | ,000      |
|                           | 403073303 | ,000      |
|                           | 403073651 | ,000      |
|                           | 403073771 | ,000      |
|                           | 403133102 | ,000      |
|                           | 403133106 | ,000      |
|                           | 403133107 | 1,000     |
|                           | 403133109 | ,000      |
|                           | 403133202 | ,000      |
|                           | 403133203 | ,000      |
|                           | 403133204 | ,000      |
|                           | 403133315 | ,000      |
|                           | 403133322 | ,000      |
|                           | 403133401 | ,000      |
|                           | 403133402 | ,000      |
|                           | 403133550 | ,000      |
|                           | 403133772 | ,000      |
|                           | 403135803 | ,000      |
|                           | 404060001 | ,000      |
|                           | 404060002 | ,000      |
|                           | 404310003 | ,000      |
|                           | 404310004 | ,000      |

1  
2  
3  
4  
5  
6  
7  
8  
9  
10  
11  
12  
13  
14  
15  
16  
17  
18  
19  
20  
21  
22  
23  
24  
25  
26  
27  
28  
29  
30  
31  
32  
33  
34  
35  
36  
37  
38  
39  
40  
41  
42  
43  
44  
45  
46  
47  
48  
49  
50  
51  
52  
53  
54  
55  
56  
57  
58  
59  
60

**Categorical Variables Codings**

|                           |           | Parameter |
|---------------------------|-----------|-----------|
|                           |           | (12)      |
| VASTY2 (SAIR*10000)+VASTY | 403073101 | ,000      |
|                           | 403073102 | ,000      |
|                           | 403073103 | ,000      |
|                           | 403073202 | ,000      |
|                           | 403073203 | ,000      |
|                           | 403073204 | ,000      |
|                           | 403073303 | ,000      |
|                           | 403073651 | ,000      |
|                           | 403073771 | ,000      |
|                           | 403133102 | ,000      |
|                           | 403133106 | ,000      |
|                           | 403133107 | ,000      |
|                           | 403133109 | 1,000     |
|                           | 403133202 | ,000      |
|                           | 403133203 | ,000      |
|                           | 403133204 | ,000      |
|                           | 403133315 | ,000      |
|                           | 403133322 | ,000      |
|                           | 403133401 | ,000      |
|                           | 403133402 | ,000      |
|                           | 403133550 | ,000      |
|                           | 403133772 | ,000      |
|                           | 403135803 | ,000      |
|                           | 404060001 | ,000      |
|                           | 404060002 | ,000      |
|                           | 404310003 | ,000      |
|                           | 404310004 | ,000      |

BMJ

## Categorical Variables Codings

|                           |           | Parameter |
|---------------------------|-----------|-----------|
|                           |           | (13)      |
| VASTY2 (SAIR*10000)+VASTY | 403073101 | ,000      |
|                           | 403073102 | ,000      |
|                           | 403073103 | ,000      |
|                           | 403073202 | ,000      |
|                           | 403073203 | ,000      |
|                           | 403073204 | ,000      |
|                           | 403073303 | ,000      |
|                           | 403073651 | ,000      |
|                           | 403073771 | ,000      |
|                           | 403133102 | ,000      |
|                           | 403133106 | ,000      |
|                           | 403133107 | ,000      |
|                           | 403133109 | ,000      |
|                           | 403133202 | 1,000     |
|                           | 403133203 | ,000      |
|                           | 403133204 | ,000      |
|                           | 403133315 | ,000      |
|                           | 403133322 | ,000      |
|                           | 403133401 | ,000      |
|                           | 403133402 | ,000      |
|                           | 403133550 | ,000      |
|                           | 403133772 | ,000      |
|                           | 403135803 | ,000      |
|                           | 404060001 | ,000      |
|                           | 404060002 | ,000      |
|                           | 404310003 | ,000      |
|                           | 404310004 | ,000      |

**Categorical Variables Codings**

|                           |           | Parameter |
|---------------------------|-----------|-----------|
|                           |           | (14)      |
| VASTY2 (SAIR*10000)+VASTY | 403073101 | ,000      |
|                           | 403073102 | ,000      |
|                           | 403073103 | ,000      |
|                           | 403073202 | ,000      |
|                           | 403073203 | ,000      |
|                           | 403073204 | ,000      |
|                           | 403073303 | ,000      |
|                           | 403073651 | ,000      |
|                           | 403073771 | ,000      |
|                           | 403133102 | ,000      |
|                           | 403133106 | ,000      |
|                           | 403133107 | ,000      |
|                           | 403133109 | ,000      |
|                           | 403133202 | ,000      |
|                           | 403133203 | 1,000     |
|                           | 403133204 | ,000      |
|                           | 403133315 | ,000      |
|                           | 403133322 | ,000      |
|                           | 403133401 | ,000      |
|                           | 403133402 | ,000      |
|                           | 403133550 | ,000      |
|                           | 403133772 | ,000      |
|                           | 403135803 | ,000      |
|                           | 404060001 | ,000      |
|                           | 404060002 | ,000      |
|                           | 404310003 | ,000      |
|                           | 404310004 | ,000      |

BMJ

## Categorical Variables Codings

|                           |           | Parameter |
|---------------------------|-----------|-----------|
|                           |           | (15)      |
| VASTY2 (SAIR*10000)+VASTY | 403073101 | ,000      |
|                           | 403073102 | ,000      |
|                           | 403073103 | ,000      |
|                           | 403073202 | ,000      |
|                           | 403073203 | ,000      |
|                           | 403073204 | ,000      |
|                           | 403073303 | ,000      |
|                           | 403073651 | ,000      |
|                           | 403073771 | ,000      |
|                           | 403133102 | ,000      |
|                           | 403133106 | ,000      |
|                           | 403133107 | ,000      |
|                           | 403133109 | ,000      |
|                           | 403133202 | ,000      |
|                           | 403133203 | ,000      |
|                           | 403133204 | 1,000     |
|                           | 403133315 | ,000      |
|                           | 403133322 | ,000      |
|                           | 403133401 | ,000      |
|                           | 403133402 | ,000      |
|                           | 403133550 | ,000      |
|                           | 403133772 | ,000      |
|                           | 403135803 | ,000      |
|                           | 404060001 | ,000      |
|                           | 404060002 | ,000      |
|                           | 404310003 | ,000      |
|                           | 404310004 | ,000      |



1  
2  
3  
4  
5  
6  
7  
8  
9  
10  
11  
12  
13  
14  
15  
16  
17  
18  
19  
20  
21  
22  
23  
24  
25  
26  
27  
28  
29  
30  
31  
32  
33  
34  
35  
36  
37  
38  
39  
40  
41  
42  
43  
44  
45  
46  
47  
48  
49  
50  
51  
52  
53  
54  
55  
56  
57  
58  
59  
60

**Categorical Variables Codings**

|                           |           | Parameter |
|---------------------------|-----------|-----------|
|                           |           | (16)      |
| VASTY2 (SAIR*10000)+VASTY | 403073101 | ,000      |
|                           | 403073102 | ,000      |
|                           | 403073103 | ,000      |
|                           | 403073202 | ,000      |
|                           | 403073203 | ,000      |
|                           | 403073204 | ,000      |
|                           | 403073303 | ,000      |
|                           | 403073651 | ,000      |
|                           | 403073771 | ,000      |
|                           | 403133102 | ,000      |
|                           | 403133106 | ,000      |
|                           | 403133107 | ,000      |
|                           | 403133109 | ,000      |
|                           | 403133202 | ,000      |
|                           | 403133203 | ,000      |
|                           | 403133204 | ,000      |
|                           | 403133315 | 1,000     |
|                           | 403133322 | ,000      |
|                           | 403133401 | ,000      |
|                           | 403133402 | ,000      |
|                           | 403133550 | ,000      |
|                           | 403133772 | ,000      |
|                           | 403135803 | ,000      |
|                           | 404060001 | ,000      |
|                           | 404060002 | ,000      |
|                           | 404310003 | ,000      |
|                           | 404310004 | ,000      |

BMJ

## Categorical Variables Codings

|                           |           | Parameter |
|---------------------------|-----------|-----------|
|                           |           | (17)      |
| VASTY2 (SAIR*10000)+VASTY | 403073101 | ,000      |
|                           | 403073102 | ,000      |
|                           | 403073103 | ,000      |
|                           | 403073202 | ,000      |
|                           | 403073203 | ,000      |
|                           | 403073204 | ,000      |
|                           | 403073303 | ,000      |
|                           | 403073651 | ,000      |
|                           | 403073771 | ,000      |
|                           | 403133102 | ,000      |
|                           | 403133106 | ,000      |
|                           | 403133107 | ,000      |
|                           | 403133109 | ,000      |
|                           | 403133202 | ,000      |
|                           | 403133203 | ,000      |
|                           | 403133204 | ,000      |
|                           | 403133315 | ,000      |
|                           | 403133322 | 1,000     |
|                           | 403133401 | ,000      |
|                           | 403133402 | ,000      |
|                           | 403133550 | ,000      |
|                           | 403133772 | ,000      |
|                           | 403135803 | ,000      |
|                           | 404060001 | ,000      |
|                           | 404060002 | ,000      |
|                           | 404310003 | ,000      |
|                           | 404310004 | ,000      |

**Categorical Variables Codings**

|                           |           | Parameter |
|---------------------------|-----------|-----------|
|                           |           | (18)      |
| VASTY2 (SAIR*10000)+VASTY | 403073101 | ,000      |
|                           | 403073102 | ,000      |
|                           | 403073103 | ,000      |
|                           | 403073202 | ,000      |
|                           | 403073203 | ,000      |
|                           | 403073204 | ,000      |
|                           | 403073303 | ,000      |
|                           | 403073651 | ,000      |
|                           | 403073771 | ,000      |
|                           | 403133102 | ,000      |
|                           | 403133106 | ,000      |
|                           | 403133107 | ,000      |
|                           | 403133109 | ,000      |
|                           | 403133202 | ,000      |
|                           | 403133203 | ,000      |
|                           | 403133204 | ,000      |
|                           | 403133315 | ,000      |
|                           | 403133322 | ,000      |
|                           | 403133401 | 1,000     |
|                           | 403133402 | ,000      |
|                           | 403133550 | ,000      |
|                           | 403133772 | ,000      |
|                           | 403135803 | ,000      |
|                           | 404060001 | ,000      |
|                           | 404060002 | ,000      |
|                           | 404310003 | ,000      |
|                           | 404310004 | ,000      |

BMJ

## Categorical Variables Codings

|                           |           | Parameter |
|---------------------------|-----------|-----------|
|                           |           | (19)      |
| VASTY2 (SAIR*10000)+VASTY | 403073101 | ,000      |
|                           | 403073102 | ,000      |
|                           | 403073103 | ,000      |
|                           | 403073202 | ,000      |
|                           | 403073203 | ,000      |
|                           | 403073204 | ,000      |
|                           | 403073303 | ,000      |
|                           | 403073651 | ,000      |
|                           | 403073771 | ,000      |
|                           | 403133102 | ,000      |
|                           | 403133106 | ,000      |
|                           | 403133107 | ,000      |
|                           | 403133109 | ,000      |
|                           | 403133202 | ,000      |
|                           | 403133203 | ,000      |
|                           | 403133204 | ,000      |
|                           | 403133315 | ,000      |
|                           | 403133322 | ,000      |
|                           | 403133401 | ,000      |
|                           | 403133402 | 1,000     |
|                           | 403133550 | ,000      |
|                           | 403133772 | ,000      |
|                           | 403135803 | ,000      |
|                           | 404060001 | ,000      |
|                           | 404060002 | ,000      |
|                           | 404310003 | ,000      |
|                           | 404310004 | ,000      |

## Categorical Variables Codings

|                           |           | Parameter |
|---------------------------|-----------|-----------|
|                           |           | (20)      |
| VASTY2 (SAIR*10000)+VASTY | 403073101 | ,000      |
|                           | 403073102 | ,000      |
|                           | 403073103 | ,000      |
|                           | 403073202 | ,000      |
|                           | 403073203 | ,000      |
|                           | 403073204 | ,000      |
|                           | 403073303 | ,000      |
|                           | 403073651 | ,000      |
|                           | 403073771 | ,000      |
|                           | 403133102 | ,000      |
|                           | 403133106 | ,000      |
|                           | 403133107 | ,000      |
|                           | 403133109 | ,000      |
|                           | 403133202 | ,000      |
|                           | 403133203 | ,000      |
|                           | 403133204 | ,000      |
|                           | 403133315 | ,000      |
|                           | 403133322 | ,000      |
|                           | 403133401 | ,000      |
|                           | 403133402 | ,000      |
|                           | 403133550 | 1,000     |
|                           | 403133772 | ,000      |
|                           | 403135803 | ,000      |
|                           | 404060001 | ,000      |
|                           | 404060002 | ,000      |
|                           | 404310003 | ,000      |
|                           | 404310004 | ,000      |

## Categorical Variables Codings

|                           |           | Parameter |
|---------------------------|-----------|-----------|
|                           |           | (21)      |
| VASTY2 (SAIR*10000)+VASTY | 403073101 | ,000      |
|                           | 403073102 | ,000      |
|                           | 403073103 | ,000      |
|                           | 403073202 | ,000      |
|                           | 403073203 | ,000      |
|                           | 403073204 | ,000      |
|                           | 403073303 | ,000      |
|                           | 403073651 | ,000      |
|                           | 403073771 | ,000      |
|                           | 403133102 | ,000      |
|                           | 403133106 | ,000      |
|                           | 403133107 | ,000      |
|                           | 403133109 | ,000      |
|                           | 403133202 | ,000      |
|                           | 403133203 | ,000      |
|                           | 403133204 | ,000      |
|                           | 403133315 | ,000      |
|                           | 403133322 | ,000      |
|                           | 403133401 | ,000      |
|                           | 403133402 | ,000      |
|                           | 403133550 | ,000      |
|                           | 403133772 | 1,000     |
|                           | 403135803 | ,000      |
|                           | 404060001 | ,000      |
|                           | 404060002 | ,000      |
|                           | 404310003 | ,000      |
|                           | 404310004 | ,000      |

1  
2  
3  
4  
5  
6  
7  
8  
9  
10  
11  
12  
13  
14  
15  
16  
17  
18  
19  
20  
21  
22  
23  
24  
25  
26  
27  
28  
29  
30  
31  
32  
33  
34  
35  
36  
37  
38  
39  
40  
41  
42  
43  
44  
45  
46  
47  
48  
49  
50  
51  
52  
53  
54  
55  
56  
57  
58  
59  
60

**Categorical Variables Codings**

|                           |           | Parameter |
|---------------------------|-----------|-----------|
|                           |           | (22)      |
| VASTY2 (SAIR*10000)+VASTY | 403073101 | ,000      |
|                           | 403073102 | ,000      |
|                           | 403073103 | ,000      |
|                           | 403073202 | ,000      |
|                           | 403073203 | ,000      |
|                           | 403073204 | ,000      |
|                           | 403073303 | ,000      |
|                           | 403073651 | ,000      |
|                           | 403073771 | ,000      |
|                           | 403133102 | ,000      |
|                           | 403133106 | ,000      |
|                           | 403133107 | ,000      |
|                           | 403133109 | ,000      |
|                           | 403133202 | ,000      |
|                           | 403133203 | ,000      |
|                           | 403133204 | ,000      |
|                           | 403133315 | ,000      |
|                           | 403133322 | ,000      |
|                           | 403133401 | ,000      |
|                           | 403133402 | ,000      |
|                           | 403133550 | ,000      |
|                           | 403133772 | ,000      |
|                           | 403135803 | 1,000     |
|                           | 404060001 | ,000      |
|                           | 404060002 | ,000      |
|                           | 404310003 | ,000      |
|                           | 404310004 | ,000      |

BMJ

## Categorical Variables Codings

|                           |           | Parameter |
|---------------------------|-----------|-----------|
|                           |           | (23)      |
| VASTY2 (SAIR*10000)+VASTY | 403073101 | ,000      |
|                           | 403073102 | ,000      |
|                           | 403073103 | ,000      |
|                           | 403073202 | ,000      |
|                           | 403073203 | ,000      |
|                           | 403073204 | ,000      |
|                           | 403073303 | ,000      |
|                           | 403073651 | ,000      |
|                           | 403073771 | ,000      |
|                           | 403133102 | ,000      |
|                           | 403133106 | ,000      |
|                           | 403133107 | ,000      |
|                           | 403133109 | ,000      |
|                           | 403133202 | ,000      |
|                           | 403133203 | ,000      |
|                           | 403133204 | ,000      |
|                           | 403133315 | ,000      |
|                           | 403133322 | ,000      |
|                           | 403133401 | ,000      |
|                           | 403133402 | ,000      |
|                           | 403133550 | ,000      |
|                           | 403133772 | ,000      |
|                           | 403135803 | ,000      |
|                           | 404060001 | 1,000     |
|                           | 404060002 | ,000      |
|                           | 404310003 | ,000      |
|                           | 404310004 | ,000      |



1  
2  
3  
4  
5  
6  
7  
8  
9  
10  
11  
12  
13  
14  
15  
16  
17  
18  
19  
20  
21  
22  
23  
24  
25  
26  
27  
28  
29  
30  
31  
32  
33  
34  
35  
36  
37  
38  
39  
40  
41  
42  
43  
44  
45  
46  
47  
48  
49  
50  
51  
52  
53  
54  
55  
56  
57  
58  
59  
60

**Categorical Variables Codings**

|                           |           | Parameter |
|---------------------------|-----------|-----------|
|                           |           | (24)      |
| VASTY2 (SAIR*10000)+VASTY | 403073101 | ,000      |
|                           | 403073102 | ,000      |
|                           | 403073103 | ,000      |
|                           | 403073202 | ,000      |
|                           | 403073203 | ,000      |
|                           | 403073204 | ,000      |
|                           | 403073303 | ,000      |
|                           | 403073651 | ,000      |
|                           | 403073771 | ,000      |
|                           | 403133102 | ,000      |
|                           | 403133106 | ,000      |
|                           | 403133107 | ,000      |
|                           | 403133109 | ,000      |
|                           | 403133202 | ,000      |
|                           | 403133203 | ,000      |
|                           | 403133204 | ,000      |
|                           | 403133315 | ,000      |
|                           | 403133322 | ,000      |
|                           | 403133401 | ,000      |
|                           | 403133402 | ,000      |
|                           | 403133550 | ,000      |
|                           | 403133772 | ,000      |
|                           | 403135803 | ,000      |
|                           | 404060001 | ,000      |
|                           | 404060002 | 1,000     |
|                           | 404310003 | ,000      |
|                           | 404310004 | ,000      |

BMJ

## Categorical Variables Codings

|                           |           | Parameter |
|---------------------------|-----------|-----------|
|                           |           | (25)      |
| VASTY2 (SAIR*10000)+VASTY | 403073101 | ,000      |
|                           | 403073102 | ,000      |
|                           | 403073103 | ,000      |
|                           | 403073202 | ,000      |
|                           | 403073203 | ,000      |
|                           | 403073204 | ,000      |
|                           | 403073303 | ,000      |
|                           | 403073651 | ,000      |
|                           | 403073771 | ,000      |
|                           | 403133102 | ,000      |
|                           | 403133106 | ,000      |
|                           | 403133107 | ,000      |
|                           | 403133109 | ,000      |
|                           | 403133202 | ,000      |
|                           | 403133203 | ,000      |
|                           | 403133204 | ,000      |
|                           | 403133315 | ,000      |
|                           | 403133322 | ,000      |
|                           | 403133401 | ,000      |
|                           | 403133402 | ,000      |
|                           | 403133550 | ,000      |
|                           | 403133772 | ,000      |
|                           | 403135803 | ,000      |
|                           | 404060001 | ,000      |
|                           | 404060002 | ,000      |
|                           | 404310003 | 1,000     |
|                           | 404310004 | ,000      |

1  
2  
3  
4  
5  
6  
7  
8  
9  
10  
11  
12  
13  
14  
15  
16  
17  
18  
19  
20  
21  
22  
23  
24  
25  
26  
27  
28  
29  
30  
31  
32  
33  
34  
35  
36  
37  
38  
39  
40  
41  
42  
43  
44  
45  
46  
47  
48  
49  
50  
51  
52  
53  
54  
55  
56  
57  
58  
59  
60

**Categorical Variables Codings**

|                           |           | Parameter |
|---------------------------|-----------|-----------|
|                           |           | (26)      |
| VASTY2 (SAIR*10000)+VASTY | 403073101 | ,000      |
|                           | 403073102 | ,000      |
|                           | 403073103 | ,000      |
|                           | 403073202 | ,000      |
|                           | 403073203 | ,000      |
|                           | 403073204 | ,000      |
|                           | 403073303 | ,000      |
|                           | 403073651 | ,000      |
|                           | 403073771 | ,000      |
|                           | 403133102 | ,000      |
|                           | 403133106 | ,000      |
|                           | 403133107 | ,000      |
|                           | 403133109 | ,000      |
|                           | 403133202 | ,000      |
|                           | 403133203 | ,000      |
|                           | 403133204 | ,000      |
|                           | 403133315 | ,000      |
|                           | 403133322 | ,000      |
|                           | 403133401 | ,000      |
|                           | 403133402 | ,000      |
|                           | 403133550 | ,000      |
|                           | 403133772 | ,000      |
|                           | 403135803 | ,000      |
|                           | 404060001 | ,000      |
|                           | 404060002 | ,000      |
|                           | 404310003 | ,000      |
|                           | 404310004 | 1,000     |

BMJ

## Categorical Variables Codings

|                           |           | Parameter |
|---------------------------|-----------|-----------|
|                           |           | (27)      |
| VASTY2 (SAIR*10000)+VASTY | 403073101 | ,000      |
|                           | 403073102 | ,000      |
|                           | 403073103 | ,000      |
|                           | 403073202 | ,000      |
|                           | 403073203 | ,000      |
|                           | 403073204 | ,000      |
|                           | 403073303 | ,000      |
|                           | 403073651 | ,000      |
|                           | 403073771 | ,000      |
|                           | 403133102 | ,000      |
|                           | 403133106 | ,000      |
|                           | 403133107 | ,000      |
|                           | 403133109 | ,000      |
|                           | 403133202 | ,000      |
|                           | 403133203 | ,000      |
|                           | 403133204 | ,000      |
|                           | 403133315 | ,000      |
|                           | 403133322 | ,000      |
|                           | 403133401 | ,000      |
|                           | 403133402 | ,000      |
|                           | 403133550 | ,000      |
|                           | 403133772 | ,000      |
|                           | 403135803 | ,000      |
|                           | 404060001 | ,000      |
|                           | 404060002 | ,000      |
|                           | 404310003 | ,000      |
|                           | 404310004 | ,000      |

1  
2  
3  
4  
5  
6  
7  
8  
9  
10  
11  
12  
13  
14  
15  
16  
17  
18  
19  
20  
21  
22  
23  
24  
25  
26  
27  
28  
29  
30  
31  
32  
33  
34  
35  
36  
37  
38  
39  
40  
41  
42  
43  
44  
45  
46  
47  
48  
49  
50  
51  
52  
53  
54  
55  
56  
57  
58  
59  
60

**Categorical Variables Codings**

|                           |           | Parameter |
|---------------------------|-----------|-----------|
|                           |           | (28)      |
| VASTY2 (SAIR*10000)+VASTY | 403073101 | ,000      |
|                           | 403073102 | ,000      |
|                           | 403073103 | ,000      |
|                           | 403073202 | ,000      |
|                           | 403073203 | ,000      |
|                           | 403073204 | ,000      |
|                           | 403073303 | ,000      |
|                           | 403073651 | ,000      |
|                           | 403073771 | ,000      |
|                           | 403133102 | ,000      |
|                           | 403133106 | ,000      |
|                           | 403133107 | ,000      |
|                           | 403133109 | ,000      |
|                           | 403133202 | ,000      |
|                           | 403133203 | ,000      |
|                           | 403133204 | ,000      |
|                           | 403133315 | ,000      |
|                           | 403133322 | ,000      |
|                           | 403133401 | ,000      |
|                           | 403133402 | ,000      |
|                           | 403133550 | ,000      |
|                           | 403133772 | ,000      |
|                           | 403135803 | ,000      |
|                           | 404060001 | ,000      |
|                           | 404060002 | ,000      |
|                           | 404310003 | ,000      |
|                           | 404310004 | ,000      |

BMJ

## Categorical Variables Codings

|                           |           | Parameter |
|---------------------------|-----------|-----------|
|                           |           | (29)      |
| VASTY2 (SAIR*10000)+VASTY | 403073101 | ,000      |
|                           | 403073102 | ,000      |
|                           | 403073103 | ,000      |
|                           | 403073202 | ,000      |
|                           | 403073203 | ,000      |
|                           | 403073204 | ,000      |
|                           | 403073303 | ,000      |
|                           | 403073651 | ,000      |
|                           | 403073771 | ,000      |
|                           | 403133102 | ,000      |
|                           | 403133106 | ,000      |
|                           | 403133107 | ,000      |
|                           | 403133109 | ,000      |
|                           | 403133202 | ,000      |
|                           | 403133203 | ,000      |
|                           | 403133204 | ,000      |
|                           | 403133315 | ,000      |
|                           | 403133322 | ,000      |
|                           | 403133401 | ,000      |
|                           | 403133402 | ,000      |
|                           | 403133550 | ,000      |
|                           | 403133772 | ,000      |
|                           | 403135803 | ,000      |
|                           | 404060001 | ,000      |
|                           | 404060002 | ,000      |
|                           | 404310003 | ,000      |
|                           | 404310004 | ,000      |

1  
2  
3  
4  
5  
6  
7  
8  
9  
10  
11  
12  
13  
14  
15  
16  
17  
18  
19  
20  
21  
22  
23  
24  
25  
26  
27  
28  
29  
30  
31  
32  
33  
34  
35  
36  
37  
38  
39  
40  
41  
42  
43  
44  
45  
46  
47  
48  
49  
50  
51  
52  
53  
54  
55  
56  
57  
58  
59  
60

**Categorical Variables Codings**

|                           |           | Parameter |
|---------------------------|-----------|-----------|
|                           |           | (30)      |
| VASTY2 (SAIR*10000)+VASTY | 403073101 | ,000      |
|                           | 403073102 | ,000      |
|                           | 403073103 | ,000      |
|                           | 403073202 | ,000      |
|                           | 403073203 | ,000      |
|                           | 403073204 | ,000      |
|                           | 403073303 | ,000      |
|                           | 403073651 | ,000      |
|                           | 403073771 | ,000      |
|                           | 403133102 | ,000      |
|                           | 403133106 | ,000      |
|                           | 403133107 | ,000      |
|                           | 403133109 | ,000      |
|                           | 403133202 | ,000      |
|                           | 403133203 | ,000      |
|                           | 403133204 | ,000      |
|                           | 403133315 | ,000      |
|                           | 403133322 | ,000      |
|                           | 403133401 | ,000      |
|                           | 403133402 | ,000      |
|                           | 403133550 | ,000      |
|                           | 403133772 | ,000      |
|                           | 403135803 | ,000      |
|                           | 404060001 | ,000      |
|                           | 404060002 | ,000      |
|                           | 404310003 | ,000      |
|                           | 404310004 | ,000      |

BMJ

## Categorical Variables Codings

|                           |           | Parameter |
|---------------------------|-----------|-----------|
|                           |           | (31)      |
| VASTY2 (SAIR*10000)+VASTY | 403073101 | ,000      |
|                           | 403073102 | ,000      |
|                           | 403073103 | ,000      |
|                           | 403073202 | ,000      |
|                           | 403073203 | ,000      |
|                           | 403073204 | ,000      |
|                           | 403073303 | ,000      |
|                           | 403073651 | ,000      |
|                           | 403073771 | ,000      |
|                           | 403133102 | ,000      |
|                           | 403133106 | ,000      |
|                           | 403133107 | ,000      |
|                           | 403133109 | ,000      |
|                           | 403133202 | ,000      |
|                           | 403133203 | ,000      |
|                           | 403133204 | ,000      |
|                           | 403133315 | ,000      |
|                           | 403133322 | ,000      |
|                           | 403133401 | ,000      |
|                           | 403133402 | ,000      |
|                           | 403133550 | ,000      |
|                           | 403133772 | ,000      |
|                           | 403135803 | ,000      |
|                           | 404060001 | ,000      |
|                           | 404060002 | ,000      |
|                           | 404310003 | ,000      |
|                           | 404310004 | ,000      |



1  
2  
3  
4  
5  
6  
7  
8  
9  
10  
11  
12  
13  
14  
15  
16  
17  
18  
19  
20  
21  
22  
23  
24  
25  
26  
27  
28  
29  
30  
31  
32  
33  
34  
35  
36  
37  
38  
39  
40  
41  
42  
43  
44  
45  
46  
47  
48  
49  
50  
51  
52  
53  
54  
55  
56  
57  
58  
59  
60

**Categorical Variables Codings**

|                           |           | Parameter |
|---------------------------|-----------|-----------|
|                           |           | (32)      |
| VASTY2 (SAIR*10000)+VASTY | 403073101 | ,000      |
|                           | 403073102 | ,000      |
|                           | 403073103 | ,000      |
|                           | 403073202 | ,000      |
|                           | 403073203 | ,000      |
|                           | 403073204 | ,000      |
|                           | 403073303 | ,000      |
|                           | 403073651 | ,000      |
|                           | 403073771 | ,000      |
|                           | 403133102 | ,000      |
|                           | 403133106 | ,000      |
|                           | 403133107 | ,000      |
|                           | 403133109 | ,000      |
|                           | 403133202 | ,000      |
|                           | 403133203 | ,000      |
|                           | 403133204 | ,000      |
|                           | 403133315 | ,000      |
|                           | 403133322 | ,000      |
|                           | 403133401 | ,000      |
|                           | 403133402 | ,000      |
|                           | 403133550 | ,000      |
|                           | 403133772 | ,000      |
|                           | 403135803 | ,000      |
|                           | 404060001 | ,000      |
|                           | 404060002 | ,000      |
|                           | 404310003 | ,000      |
|                           | 404310004 | ,000      |

BMJ

## Categorical Variables Codings

|                           |           | Parameter |
|---------------------------|-----------|-----------|
|                           |           | (33)      |
| VASTY2 (SAIR*10000)+VASTY | 403073101 | ,000      |
|                           | 403073102 | ,000      |
|                           | 403073103 | ,000      |
|                           | 403073202 | ,000      |
|                           | 403073203 | ,000      |
|                           | 403073204 | ,000      |
|                           | 403073303 | ,000      |
|                           | 403073651 | ,000      |
|                           | 403073771 | ,000      |
|                           | 403133102 | ,000      |
|                           | 403133106 | ,000      |
|                           | 403133107 | ,000      |
|                           | 403133109 | ,000      |
|                           | 403133202 | ,000      |
|                           | 403133203 | ,000      |
|                           | 403133204 | ,000      |
|                           | 403133315 | ,000      |
|                           | 403133322 | ,000      |
|                           | 403133401 | ,000      |
|                           | 403133402 | ,000      |
|                           | 403133550 | ,000      |
|                           | 403133772 | ,000      |
|                           | 403135803 | ,000      |
|                           | 404060001 | ,000      |
|                           | 404060002 | ,000      |
|                           | 404310003 | ,000      |
|                           | 404310004 | ,000      |

1  
2  
3  
4  
5  
6  
7  
8  
9  
10  
11  
12  
13  
14  
15  
16  
17  
18  
19  
20  
21  
22  
23  
24  
25  
26  
27  
28  
29  
30  
31  
32  
33  
34  
35  
36  
37  
38  
39  
40  
41  
42  
43  
44  
45  
46  
47  
48  
49  
50  
51  
52  
53  
54  
55  
56  
57  
58  
59  
60

**Categorical Variables Codings**

|                           |           | Parameter |
|---------------------------|-----------|-----------|
|                           |           | (34)      |
| VASTY2 (SAIR*10000)+VASTY | 403073101 | ,000      |
|                           | 403073102 | ,000      |
|                           | 403073103 | ,000      |
|                           | 403073202 | ,000      |
|                           | 403073203 | ,000      |
|                           | 403073204 | ,000      |
|                           | 403073303 | ,000      |
|                           | 403073651 | ,000      |
|                           | 403073771 | ,000      |
|                           | 403133102 | ,000      |
|                           | 403133106 | ,000      |
|                           | 403133107 | ,000      |
|                           | 403133109 | ,000      |
|                           | 403133202 | ,000      |
|                           | 403133203 | ,000      |
|                           | 403133204 | ,000      |
|                           | 403133315 | ,000      |
|                           | 403133322 | ,000      |
|                           | 403133401 | ,000      |
|                           | 403133402 | ,000      |
|                           | 403133550 | ,000      |
|                           | 403133772 | ,000      |
|                           | 403135803 | ,000      |
|                           | 404060001 | ,000      |
|                           | 404060002 | ,000      |
|                           | 404310003 | ,000      |
|                           | 404310004 | ,000      |

BMJ

## Categorical Variables Codings

|                           |           | Paramete... |
|---------------------------|-----------|-------------|
|                           |           | (35)        |
| VASTY2 (SAIR*10000)+VASTY | 403073101 | ,000        |
|                           | 403073102 | ,000        |
|                           | 403073103 | ,000        |
|                           | 403073202 | ,000        |
|                           | 403073203 | ,000        |
|                           | 403073204 | ,000        |
|                           | 403073303 | ,000        |
|                           | 403073651 | ,000        |
|                           | 403073771 | ,000        |
|                           | 403133102 | ,000        |
|                           | 403133106 | ,000        |
|                           | 403133107 | ,000        |
|                           | 403133109 | ,000        |
|                           | 403133202 | ,000        |
|                           | 403133203 | ,000        |
|                           | 403133204 | ,000        |
|                           | 403133315 | ,000        |
|                           | 403133322 | ,000        |
|                           | 403133401 | ,000        |
|                           | 403133402 | ,000        |
|                           | 403133550 | ,000        |
|                           | 403133772 | ,000        |
|                           | 403135803 | ,000        |
|                           | 404060001 | ,000        |
|                           | 404060002 | ,000        |
|                           | 404310003 | ,000        |
|                           | 404310004 | ,000        |

## Categorical Variables Codings

|                                              |                                         | Frequency |
|----------------------------------------------|-----------------------------------------|-----------|
|                                              | 502300005                               | 366       |
|                                              | 502300006                               | 225       |
|                                              | 502300007                               | 366       |
|                                              | 502300214                               | 366       |
|                                              | 502300411                               | 366       |
|                                              | 502300415                               | 360       |
|                                              | 502300416                               | 363       |
|                                              | 502300811                               | 364       |
|                                              | 502300913                               | 315       |
| weekday veckodag                             | 1 måndag                                | 1805      |
|                                              | 2 tisdag                                | 1812      |
|                                              | 3 onsdag                                | 1800      |
|                                              | 4 torsdag                               | 1794      |
|                                              | 5 fredag                                | 1788      |
|                                              | 6 lördag                                | 1735      |
|                                              | 7 söndag                                | 1741      |
| season säsong/period                         | 1 januari-mars                          | 3182      |
|                                              | 2 april-maj                             | 2127      |
|                                              | 3 juni-augusti                          | 2911      |
|                                              | 4 september-oktober                     | 2144      |
|                                              | 5 november-december                     | 2111      |
| bv3 belasnting vs paoncil dubbla intervallet | 1 medelbelastning                       | 9121      |
|                                              | 2 underbelastning                       | 1505      |
|                                              | 3 överbelastning                        | 1849      |
| holiday större helg                          | 1 ingen större helg                     | 12078     |
|                                              | 2 större helg (påsk/midsommar/julonyår) | 397       |

## Categorical Variables Codings

|                                              |                                         | Parameter |
|----------------------------------------------|-----------------------------------------|-----------|
|                                              |                                         | (1)       |
|                                              | 502300005                               | ,000      |
|                                              | 502300006                               | ,000      |
|                                              | 502300007                               | ,000      |
|                                              | 502300214                               | ,000      |
|                                              | 502300411                               | ,000      |
|                                              | 502300415                               | ,000      |
|                                              | 502300416                               | ,000      |
|                                              | 502300811                               | ,000      |
|                                              | 502300913                               | ,000      |
| weekday veckodag                             | 1 måndag                                | ,000      |
|                                              | 2 tisdag                                | 1,000     |
|                                              | 3 onsdag                                | ,000      |
|                                              | 4 torsdag                               | ,000      |
|                                              | 5 fredag                                | ,000      |
|                                              | 6 lördag                                | ,000      |
|                                              | 7 söndag                                | ,000      |
| season säsong/period                         | 1 januari-mars                          | ,000      |
|                                              | 2 april-maj                             | 1,000     |
|                                              | 3 juni-augusti                          | ,000      |
|                                              | 4 september-oktober                     | ,000      |
|                                              | 5 november-december                     | ,000      |
| bv3 belasnting vs paoncil dubbla intervallet | 1 medelbelastning                       | ,000      |
|                                              | 2 underbelastning                       | 1,000     |
|                                              | 3 överbelastning                        | ,000      |
| holiday större helg                          | 1 ingen större helg                     | ,000      |
|                                              | 2 större helg (påsk/midsommar/julonyår) | 1,000     |

## Categorical Variables Codings

|                                              |                                         | Parameter |
|----------------------------------------------|-----------------------------------------|-----------|
|                                              |                                         | (2)       |
|                                              | 502300005                               | ,000      |
|                                              | 502300006                               | ,000      |
|                                              | 502300007                               | ,000      |
|                                              | 502300214                               | ,000      |
|                                              | 502300411                               | ,000      |
|                                              | 502300415                               | ,000      |
|                                              | 502300416                               | ,000      |
|                                              | 502300811                               | ,000      |
|                                              | 502300913                               | ,000      |
| weekday veckodag                             | 1 måndag                                | ,000      |
|                                              | 2 tisdag                                | ,000      |
|                                              | 3 onsdag                                | 1,000     |
|                                              | 4 torsdag                               | ,000      |
|                                              | 5 fredag                                | ,000      |
|                                              | 6 lördag                                | ,000      |
|                                              | 7 söndag                                | ,000      |
| season säsong/period                         | 1 januari-mars                          | ,000      |
|                                              | 2 april-maj                             | ,000      |
|                                              | 3 juni-augusti                          | 1,000     |
|                                              | 4 september-oktober                     | ,000      |
|                                              | 5 november-december                     | ,000      |
| bv3 belasnting vs paoncil dubbla intervallet | 1 medelbelastning                       | ,000      |
|                                              | 2 underbelastning                       | ,000      |
|                                              | 3 överbelastning                        | 1,000     |
| holiday större helg                          | 1 ingen större helg                     |           |
|                                              | 2 större helg (påsk/midsommar/julonyår) |           |

## Categorical Variables Codings

|                                              |                                         | Parameter |
|----------------------------------------------|-----------------------------------------|-----------|
|                                              |                                         | (3)       |
|                                              | 502300005                               | ,000      |
|                                              | 502300006                               | ,000      |
|                                              | 502300007                               | ,000      |
|                                              | 502300214                               | ,000      |
|                                              | 502300411                               | ,000      |
|                                              | 502300415                               | ,000      |
|                                              | 502300416                               | ,000      |
|                                              | 502300811                               | ,000      |
|                                              | 502300913                               | ,000      |
| weekday veckodag                             | 1 måndag                                | ,000      |
|                                              | 2 tisdag                                | ,000      |
|                                              | 3 onsdag                                | ,000      |
|                                              | 4 torsdag                               | 1,000     |
|                                              | 5 fredag                                | ,000      |
|                                              | 6 lördag                                | ,000      |
|                                              | 7 söndag                                | ,000      |
| season säsong/period                         | 1 januari-mars                          | ,000      |
|                                              | 2 april-maj                             | ,000      |
|                                              | 3 juni-augusti                          | ,000      |
|                                              | 4 september-oktober                     | 1,000     |
|                                              | 5 november-december                     | ,000      |
| bv3 belasnting vs paoncil dubbla intervallet | 1 medelbelastning                       |           |
|                                              | 2 underbelastning                       |           |
|                                              | 3 överbelastning                        |           |
| holiday större helg                          | 1 ingen större helg                     |           |
|                                              | 2 större helg (påsk/midsommar/julonyår) |           |



## Categorical Variables Codings

|                                              |                                         | Parameter |
|----------------------------------------------|-----------------------------------------|-----------|
|                                              |                                         | (4)       |
|                                              | 502300005                               | ,000      |
|                                              | 502300006                               | ,000      |
|                                              | 502300007                               | ,000      |
|                                              | 502300214                               | ,000      |
|                                              | 502300411                               | ,000      |
|                                              | 502300415                               | ,000      |
|                                              | 502300416                               | ,000      |
|                                              | 502300811                               | ,000      |
|                                              | 502300913                               | ,000      |
| weekday veckodag                             | 1 måndag                                | ,000      |
|                                              | 2 tisdag                                | ,000      |
|                                              | 3 onsdag                                | ,000      |
|                                              | 4 torsdag                               | ,000      |
|                                              | 5 fredag                                | 1,000     |
|                                              | 6 lördag                                | ,000      |
|                                              | 7 söndag                                | ,000      |
| season säsong/period                         | 1 januari-mars                          | ,000      |
|                                              | 2 april-maj                             | ,000      |
|                                              | 3 juni-augusti                          | ,000      |
|                                              | 4 september-oktober                     | ,000      |
|                                              | 5 november-december                     | 1,000     |
| bv3 belasnting vs paoncil dubbla intervallet | 1 medelbelastning                       |           |
|                                              | 2 underbelastning                       |           |
|                                              | 3 överbelastning                        |           |
| holiday större helg                          | 1 ingen större helg                     |           |
|                                              | 2 större helg (påsk/midsommar/julonyår) |           |

## Categorical Variables Codings

|                                              |                                         | Parameter |
|----------------------------------------------|-----------------------------------------|-----------|
|                                              |                                         | (5)       |
|                                              | 502300005                               | ,000      |
|                                              | 502300006                               | ,000      |
|                                              | 502300007                               | ,000      |
|                                              | 502300214                               | ,000      |
|                                              | 502300411                               | ,000      |
|                                              | 502300415                               | ,000      |
|                                              | 502300416                               | ,000      |
|                                              | 502300811                               | ,000      |
|                                              | 502300913                               | ,000      |
| weekday veckodag                             | 1 måndag                                | ,000      |
|                                              | 2 tisdag                                | ,000      |
|                                              | 3 onsdag                                | ,000      |
|                                              | 4 torsdag                               | ,000      |
|                                              | 5 fredag                                | ,000      |
|                                              | 6 lördag                                | 1,000     |
|                                              | 7 söndag                                | ,000      |
| season säsong/period                         | 1 januari-mars                          |           |
|                                              | 2 april-maj                             |           |
|                                              | 3 juni-augusti                          |           |
|                                              | 4 september-oktober                     |           |
|                                              | 5 november-december                     |           |
| bv3 belasnting vs paoncil dubbla intervallet | 1 medelbelastning                       |           |
|                                              | 2 underbelastning                       |           |
|                                              | 3 överbelastning                        |           |
| holiday större helg                          | 1 ingen större helg                     |           |
|                                              | 2 större helg (påsk/midsommar/julonyår) |           |

## Categorical Variables Codings

|                                              |                                         | Parameter |
|----------------------------------------------|-----------------------------------------|-----------|
|                                              |                                         | (6)       |
|                                              | 502300005                               | ,000      |
|                                              | 502300006                               | ,000      |
|                                              | 502300007                               | ,000      |
|                                              | 502300214                               | ,000      |
|                                              | 502300411                               | ,000      |
|                                              | 502300415                               | ,000      |
|                                              | 502300416                               | ,000      |
|                                              | 502300811                               | ,000      |
|                                              | 502300913                               | ,000      |
| weekday veckodag                             | 1 måndag                                | ,000      |
|                                              | 2 tisdag                                | ,000      |
|                                              | 3 onsdag                                | ,000      |
|                                              | 4 torsdag                               | ,000      |
|                                              | 5 fredag                                | ,000      |
|                                              | 6 lördag                                | ,000      |
|                                              | 7 söndag                                | 1,000     |
| season säsong/period                         | 1 januari-mars                          |           |
|                                              | 2 april-maj                             |           |
|                                              | 3 juni-augusti                          |           |
|                                              | 4 september-oktober                     |           |
|                                              | 5 november-december                     |           |
| bv3 belasnting vs paoncil dubbla intervallet | 1 medelbelastning                       |           |
|                                              | 2 underbelastning                       |           |
|                                              | 3 överbelastning                        |           |
| holiday större helg                          | 1 ingen större helg                     |           |
|                                              | 2 större helg (påsk/midsommar/julonyår) |           |

## Categorical Variables Codings

|                                              |                                         | Parameter |
|----------------------------------------------|-----------------------------------------|-----------|
|                                              |                                         | (7)       |
|                                              | 502300005                               | ,000      |
|                                              | 502300006                               | ,000      |
|                                              | 502300007                               | ,000      |
|                                              | 502300214                               | ,000      |
|                                              | 502300411                               | ,000      |
|                                              | 502300415                               | ,000      |
|                                              | 502300416                               | ,000      |
|                                              | 502300811                               | ,000      |
|                                              | 502300913                               | ,000      |
| weekday veckodag                             | 1 måndag                                |           |
|                                              | 2 tisdag                                |           |
|                                              | 3 onsdag                                |           |
|                                              | 4 torsdag                               |           |
|                                              | 5 fredag                                |           |
|                                              | 6 lördag                                |           |
|                                              | 7 söndag                                |           |
| season säsong/period                         | 1 januari-mars                          |           |
|                                              | 2 april-maj                             |           |
|                                              | 3 juni-augusti                          |           |
|                                              | 4 september-oktober                     |           |
|                                              | 5 november-december                     |           |
| bv3 belastning vs paoncil dubbla intervallet | 1 medelbelastning                       |           |
|                                              | 2 underbelastning                       |           |
|                                              | 3 överbelastning                        |           |
| holiday större helg                          | 1 ingen större helg                     |           |
|                                              | 2 större helg (påsk/midsommar/julonyår) |           |

## Categorical Variables Codings

|                                              |                                         | Parameter |
|----------------------------------------------|-----------------------------------------|-----------|
|                                              |                                         | (8)       |
|                                              | 502300005                               | ,000      |
|                                              | 502300006                               | ,000      |
|                                              | 502300007                               | ,000      |
|                                              | 502300214                               | ,000      |
|                                              | 502300411                               | ,000      |
|                                              | 502300415                               | ,000      |
|                                              | 502300416                               | ,000      |
|                                              | 502300811                               | ,000      |
|                                              | 502300913                               | ,000      |
| weekday veckodag                             | 1 måndag                                |           |
|                                              | 2 tisdag                                |           |
|                                              | 3 onsdag                                |           |
|                                              | 4 torsdag                               |           |
|                                              | 5 fredag                                |           |
|                                              | 6 lördag                                |           |
|                                              | 7 söndag                                |           |
| season säsong/period                         | 1 januari-mars                          |           |
|                                              | 2 april-maj                             |           |
|                                              | 3 juni-augusti                          |           |
|                                              | 4 september-oktober                     |           |
|                                              | 5 november-december                     |           |
| bv3 belastning vs paoncil dubbla intervallet | 1 medelbelastning                       |           |
|                                              | 2 underbelastning                       |           |
|                                              | 3 överbelastning                        |           |
| holiday större helg                          | 1 ingen större helg                     |           |
|                                              | 2 större helg (påsk/midsommar/julonyår) |           |

## Categorical Variables Codings

|                                              |                                         | Parameter |
|----------------------------------------------|-----------------------------------------|-----------|
|                                              |                                         | (9)       |
|                                              | 502300005                               | ,000      |
|                                              | 502300006                               | ,000      |
|                                              | 502300007                               | ,000      |
|                                              | 502300214                               | ,000      |
|                                              | 502300411                               | ,000      |
|                                              | 502300415                               | ,000      |
|                                              | 502300416                               | ,000      |
|                                              | 502300811                               | ,000      |
|                                              | 502300913                               | ,000      |
| weekday veckodag                             | 1 måndag                                |           |
|                                              | 2 tisdag                                |           |
|                                              | 3 onsdag                                |           |
|                                              | 4 torsdag                               |           |
|                                              | 5 fredag                                |           |
|                                              | 6 lördag                                |           |
|                                              | 7 söndag                                |           |
| season säsong/period                         | 1 januari-mars                          |           |
|                                              | 2 april-maj                             |           |
|                                              | 3 juni-augusti                          |           |
|                                              | 4 september-oktober                     |           |
|                                              | 5 november-december                     |           |
| bv3 belasnting vs paoncil dubbla intervallet | 1 medelbelastning                       |           |
|                                              | 2 underbelastning                       |           |
|                                              | 3 överbelastning                        |           |
| holiday större helg                          | 1 ingen större helg                     |           |
|                                              | 2 större helg (påsk/midsommar/julonyår) |           |

## Categorical Variables Codings

|                                              |                                         | Parameter |
|----------------------------------------------|-----------------------------------------|-----------|
|                                              |                                         | (10)      |
|                                              | 502300005                               | ,000      |
|                                              | 502300006                               | ,000      |
|                                              | 502300007                               | ,000      |
|                                              | 502300214                               | ,000      |
|                                              | 502300411                               | ,000      |
|                                              | 502300415                               | ,000      |
|                                              | 502300416                               | ,000      |
|                                              | 502300811                               | ,000      |
|                                              | 502300913                               | ,000      |
| weekday veckodag                             | 1 måndag                                |           |
|                                              | 2 tisdag                                |           |
|                                              | 3 onsdag                                |           |
|                                              | 4 torsdag                               |           |
|                                              | 5 fredag                                |           |
|                                              | 6 lördag                                |           |
|                                              | 7 söndag                                |           |
| season säsong/period                         | 1 januari-mars                          |           |
|                                              | 2 april-maj                             |           |
|                                              | 3 juni-augusti                          |           |
|                                              | 4 september-oktober                     |           |
|                                              | 5 november-december                     |           |
| bv3 belasnting vs paoncil dubbla intervallet | 1 medelbelastning                       |           |
|                                              | 2 underbelastning                       |           |
|                                              | 3 överbelastning                        |           |
| holiday större helg                          | 1 ingen större helg                     |           |
|                                              | 2 större helg (påsk/midsommar/julonyår) |           |

## Categorical Variables Codings

|                                              |                                         | Parameter |
|----------------------------------------------|-----------------------------------------|-----------|
|                                              |                                         | (11)      |
|                                              | 502300005                               | ,000      |
|                                              | 502300006                               | ,000      |
|                                              | 502300007                               | ,000      |
|                                              | 502300214                               | ,000      |
|                                              | 502300411                               | ,000      |
|                                              | 502300415                               | ,000      |
|                                              | 502300416                               | ,000      |
|                                              | 502300811                               | ,000      |
|                                              | 502300913                               | ,000      |
| weekday veckodag                             | 1 måndag                                |           |
|                                              | 2 tisdag                                |           |
|                                              | 3 onsdag                                |           |
|                                              | 4 torsdag                               |           |
|                                              | 5 fredag                                |           |
|                                              | 6 lördag                                |           |
|                                              | 7 söndag                                |           |
| season säsong/period                         | 1 januari-mars                          |           |
|                                              | 2 april-maj                             |           |
|                                              | 3 juni-augusti                          |           |
|                                              | 4 september-oktober                     |           |
|                                              | 5 november-december                     |           |
| bv3 belasnting vs paoncil dubbla intervallet | 1 medelbelastning                       |           |
|                                              | 2 underbelastning                       |           |
|                                              | 3 överbelastning                        |           |
| holiday större helg                          | 1 ingen större helg                     |           |
|                                              | 2 större helg (påsk/midsommar/julonyår) |           |



## Categorical Variables Codings

|                                              |                                         | Parameter |
|----------------------------------------------|-----------------------------------------|-----------|
|                                              |                                         | (12)      |
|                                              | 502300005                               | ,000      |
|                                              | 502300006                               | ,000      |
|                                              | 502300007                               | ,000      |
|                                              | 502300214                               | ,000      |
|                                              | 502300411                               | ,000      |
|                                              | 502300415                               | ,000      |
|                                              | 502300416                               | ,000      |
|                                              | 502300811                               | ,000      |
|                                              | 502300913                               | ,000      |
| weekday veckodag                             | 1 måndag                                |           |
|                                              | 2 tisdag                                |           |
|                                              | 3 onsdag                                |           |
|                                              | 4 torsdag                               |           |
|                                              | 5 fredag                                |           |
|                                              | 6 lördag                                |           |
|                                              | 7 söndag                                |           |
| season säsong/period                         | 1 januari-mars                          |           |
|                                              | 2 april-maj                             |           |
|                                              | 3 juni-augusti                          |           |
|                                              | 4 september-oktober                     |           |
|                                              | 5 november-december                     |           |
| bv3 belasnting vs paoncil dubbla intervallet | 1 medelbelastning                       |           |
|                                              | 2 underbelastning                       |           |
|                                              | 3 överbelastning                        |           |
| holiday större helg                          | 1 ingen större helg                     |           |
|                                              | 2 större helg (påsk/midsommar/julonyår) |           |

## Categorical Variables Codings

|                                              |                                         | Parameter |
|----------------------------------------------|-----------------------------------------|-----------|
|                                              |                                         | (13)      |
|                                              | 502300005                               | ,000      |
|                                              | 502300006                               | ,000      |
|                                              | 502300007                               | ,000      |
|                                              | 502300214                               | ,000      |
|                                              | 502300411                               | ,000      |
|                                              | 502300415                               | ,000      |
|                                              | 502300416                               | ,000      |
|                                              | 502300811                               | ,000      |
|                                              | 502300913                               | ,000      |
| weekday veckodag                             | 1 måndag                                |           |
|                                              | 2 tisdag                                |           |
|                                              | 3 onsdag                                |           |
|                                              | 4 torsdag                               |           |
|                                              | 5 fredag                                |           |
|                                              | 6 lördag                                |           |
|                                              | 7 söndag                                |           |
| season säsong/period                         | 1 januari-mars                          |           |
|                                              | 2 april-maj                             |           |
|                                              | 3 juni-augusti                          |           |
|                                              | 4 september-oktober                     |           |
|                                              | 5 november-december                     |           |
| bv3 belasnting vs paoncil dubbla intervallet | 1 medelbelastning                       |           |
|                                              | 2 underbelastning                       |           |
|                                              | 3 överbelastning                        |           |
| holiday större helg                          | 1 ingen större helg                     |           |
|                                              | 2 större helg (påsk/midsommar/julonyår) |           |

## Categorical Variables Codings

|                                              |                                         | Parameter |
|----------------------------------------------|-----------------------------------------|-----------|
|                                              |                                         | (14)      |
|                                              | 502300005                               | ,000      |
|                                              | 502300006                               | ,000      |
|                                              | 502300007                               | ,000      |
|                                              | 502300214                               | ,000      |
|                                              | 502300411                               | ,000      |
|                                              | 502300415                               | ,000      |
|                                              | 502300416                               | ,000      |
|                                              | 502300811                               | ,000      |
|                                              | 502300913                               | ,000      |
| weekday veckodag                             | 1 måndag                                |           |
|                                              | 2 tisdag                                |           |
|                                              | 3 onsdag                                |           |
|                                              | 4 torsdag                               |           |
|                                              | 5 fredag                                |           |
|                                              | 6 lördag                                |           |
|                                              | 7 söndag                                |           |
| season säsong/period                         | 1 januari-mars                          |           |
|                                              | 2 april-maj                             |           |
|                                              | 3 juni-augusti                          |           |
|                                              | 4 september-oktober                     |           |
|                                              | 5 november-december                     |           |
| bv3 belasnting vs paoncil dubbla intervallet | 1 medelbelastning                       |           |
|                                              | 2 underbelastning                       |           |
|                                              | 3 överbelastning                        |           |
| holiday större helg                          | 1 ingen större helg                     |           |
|                                              | 2 större helg (påsk/midsommar/julonyår) |           |

## Categorical Variables Codings

|                                              |                                         | Parameter |
|----------------------------------------------|-----------------------------------------|-----------|
|                                              |                                         | (15)      |
|                                              | 502300005                               | ,000      |
|                                              | 502300006                               | ,000      |
|                                              | 502300007                               | ,000      |
|                                              | 502300214                               | ,000      |
|                                              | 502300411                               | ,000      |
|                                              | 502300415                               | ,000      |
|                                              | 502300416                               | ,000      |
|                                              | 502300811                               | ,000      |
|                                              | 502300913                               | ,000      |
| weekday veckodag                             | 1 måndag                                |           |
|                                              | 2 tisdag                                |           |
|                                              | 3 onsdag                                |           |
|                                              | 4 torsdag                               |           |
|                                              | 5 fredag                                |           |
|                                              | 6 lördag                                |           |
|                                              | 7 söndag                                |           |
| season säsong/period                         | 1 januari-mars                          |           |
|                                              | 2 april-maj                             |           |
|                                              | 3 juni-augusti                          |           |
|                                              | 4 september-oktober                     |           |
|                                              | 5 november-december                     |           |
| bv3 belasnting vs paoncil dubbla intervallet | 1 medelbelastning                       |           |
|                                              | 2 underbelastning                       |           |
|                                              | 3 överbelastning                        |           |
| holiday större helg                          | 1 ingen större helg                     |           |
|                                              | 2 större helg (påsk/midsommar/julonyår) |           |

## Categorical Variables Codings

|                                              |                                         | Parameter |
|----------------------------------------------|-----------------------------------------|-----------|
|                                              |                                         | (16)      |
|                                              | 502300005                               | ,000      |
|                                              | 502300006                               | ,000      |
|                                              | 502300007                               | ,000      |
|                                              | 502300214                               | ,000      |
|                                              | 502300411                               | ,000      |
|                                              | 502300415                               | ,000      |
|                                              | 502300416                               | ,000      |
|                                              | 502300811                               | ,000      |
|                                              | 502300913                               | ,000      |
| weekday veckodag                             | 1 måndag                                |           |
|                                              | 2 tisdag                                |           |
|                                              | 3 onsdag                                |           |
|                                              | 4 torsdag                               |           |
|                                              | 5 fredag                                |           |
|                                              | 6 lördag                                |           |
|                                              | 7 söndag                                |           |
| season säsong/period                         | 1 januari-mars                          |           |
|                                              | 2 april-maj                             |           |
|                                              | 3 juni-augusti                          |           |
|                                              | 4 september-oktober                     |           |
|                                              | 5 november-december                     |           |
| bv3 belasnting vs paoncil dubbla intervallet | 1 medelbelastning                       |           |
|                                              | 2 underbelastning                       |           |
|                                              | 3 överbelastning                        |           |
| holiday större helg                          | 1 ingen större helg                     |           |
|                                              | 2 större helg (påsk/midsommar/julonyår) |           |

## Categorical Variables Codings

|                                              |                                         | Parameter |
|----------------------------------------------|-----------------------------------------|-----------|
|                                              |                                         | (17)      |
|                                              | 502300005                               | ,000      |
|                                              | 502300006                               | ,000      |
|                                              | 502300007                               | ,000      |
|                                              | 502300214                               | ,000      |
|                                              | 502300411                               | ,000      |
|                                              | 502300415                               | ,000      |
|                                              | 502300416                               | ,000      |
|                                              | 502300811                               | ,000      |
|                                              | 502300913                               | ,000      |
| weekday veckodag                             | 1 måndag                                |           |
|                                              | 2 tisdag                                |           |
|                                              | 3 onsdag                                |           |
|                                              | 4 torsdag                               |           |
|                                              | 5 fredag                                |           |
|                                              | 6 lördag                                |           |
|                                              | 7 söndag                                |           |
| season säsong/period                         | 1 januari-mars                          |           |
|                                              | 2 april-maj                             |           |
|                                              | 3 juni-augusti                          |           |
|                                              | 4 september-oktober                     |           |
|                                              | 5 november-december                     |           |
| bv3 belasnting vs paoncil dubbla intervallet | 1 medelbelastning                       |           |
|                                              | 2 underbelastning                       |           |
|                                              | 3 överbelastning                        |           |
| holiday större helg                          | 1 ingen större helg                     |           |
|                                              | 2 större helg (påsk/midsommar/julonyår) |           |

## Categorical Variables Codings

|                                              |                                         | Parameter |
|----------------------------------------------|-----------------------------------------|-----------|
|                                              |                                         | (18)      |
|                                              | 502300005                               | ,000      |
|                                              | 502300006                               | ,000      |
|                                              | 502300007                               | ,000      |
|                                              | 502300214                               | ,000      |
|                                              | 502300411                               | ,000      |
|                                              | 502300415                               | ,000      |
|                                              | 502300416                               | ,000      |
|                                              | 502300811                               | ,000      |
|                                              | 502300913                               | ,000      |
| weekday veckodag                             | 1 måndag                                |           |
|                                              | 2 tisdag                                |           |
|                                              | 3 onsdag                                |           |
|                                              | 4 torsdag                               |           |
|                                              | 5 fredag                                |           |
|                                              | 6 lördag                                |           |
|                                              | 7 söndag                                |           |
| season säsong/period                         | 1 januari-mars                          |           |
|                                              | 2 april-maj                             |           |
|                                              | 3 juni-augusti                          |           |
|                                              | 4 september-oktober                     |           |
|                                              | 5 november-december                     |           |
| bv3 belasnting vs paoncil dubbla intervallet | 1 medelbelastning                       |           |
|                                              | 2 underbelastning                       |           |
|                                              | 3 överbelastning                        |           |
| holiday större helg                          | 1 ingen större helg                     |           |
|                                              | 2 större helg (påsk/midsommar/julonyår) |           |

## Categorical Variables Codings

|                                              |                                         | Parameter |
|----------------------------------------------|-----------------------------------------|-----------|
|                                              |                                         | (19)      |
|                                              | 502300005                               | ,000      |
|                                              | 502300006                               | ,000      |
|                                              | 502300007                               | ,000      |
|                                              | 502300214                               | ,000      |
|                                              | 502300411                               | ,000      |
|                                              | 502300415                               | ,000      |
|                                              | 502300416                               | ,000      |
|                                              | 502300811                               | ,000      |
|                                              | 502300913                               | ,000      |
| weekday veckodag                             | 1 måndag                                |           |
|                                              | 2 tisdag                                |           |
|                                              | 3 onsdag                                |           |
|                                              | 4 torsdag                               |           |
|                                              | 5 fredag                                |           |
|                                              | 6 lördag                                |           |
|                                              | 7 söndag                                |           |
| season säsong/period                         | 1 januari-mars                          |           |
|                                              | 2 april-maj                             |           |
|                                              | 3 juni-augusti                          |           |
|                                              | 4 september-oktober                     |           |
|                                              | 5 november-december                     |           |
| bv3 belasnting vs paoncil dubbla intervallet | 1 medelbelastning                       |           |
|                                              | 2 underbelastning                       |           |
|                                              | 3 överbelastning                        |           |
| holiday större helg                          | 1 ingen större helg                     |           |
|                                              | 2 större helg (påsk/midsommar/julonyår) |           |



## Categorical Variables Codings

|                                              |                                         | Parameter |
|----------------------------------------------|-----------------------------------------|-----------|
|                                              |                                         | (20)      |
|                                              | 502300005                               | ,000      |
|                                              | 502300006                               | ,000      |
|                                              | 502300007                               | ,000      |
|                                              | 502300214                               | ,000      |
|                                              | 502300411                               | ,000      |
|                                              | 502300415                               | ,000      |
|                                              | 502300416                               | ,000      |
|                                              | 502300811                               | ,000      |
|                                              | 502300913                               | ,000      |
| weekday veckodag                             | 1 måndag                                |           |
|                                              | 2 tisdag                                |           |
|                                              | 3 onsdag                                |           |
|                                              | 4 torsdag                               |           |
|                                              | 5 fredag                                |           |
|                                              | 6 lördag                                |           |
|                                              | 7 söndag                                |           |
| season säsong/period                         | 1 januari-mars                          |           |
|                                              | 2 april-maj                             |           |
|                                              | 3 juni-augusti                          |           |
|                                              | 4 september-oktober                     |           |
|                                              | 5 november-december                     |           |
| bv3 belasnting vs paoncil dubbla intervallet | 1 medelbelastning                       |           |
|                                              | 2 underbelastning                       |           |
|                                              | 3 överbelastning                        |           |
| holiday större helg                          | 1 ingen större helg                     |           |
|                                              | 2 större helg (påsk/midsommar/julonyår) |           |

## Categorical Variables Codings

|                                              |                                         | Parameter |
|----------------------------------------------|-----------------------------------------|-----------|
|                                              |                                         | (21)      |
|                                              | 502300005                               | ,000      |
|                                              | 502300006                               | ,000      |
|                                              | 502300007                               | ,000      |
|                                              | 502300214                               | ,000      |
|                                              | 502300411                               | ,000      |
|                                              | 502300415                               | ,000      |
|                                              | 502300416                               | ,000      |
|                                              | 502300811                               | ,000      |
|                                              | 502300913                               | ,000      |
| weekday veckodag                             | 1 måndag                                |           |
|                                              | 2 tisdag                                |           |
|                                              | 3 onsdag                                |           |
|                                              | 4 torsdag                               |           |
|                                              | 5 fredag                                |           |
|                                              | 6 lördag                                |           |
|                                              | 7 söndag                                |           |
| season säsong/period                         | 1 januari-mars                          |           |
|                                              | 2 april-maj                             |           |
|                                              | 3 juni-augusti                          |           |
|                                              | 4 september-oktober                     |           |
|                                              | 5 november-december                     |           |
| bv3 belasnting vs paoncil dubbla intervallet | 1 medelbelastning                       |           |
|                                              | 2 underbelastning                       |           |
|                                              | 3 överbelastning                        |           |
| holiday större helg                          | 1 ingen större helg                     |           |
|                                              | 2 större helg (påsk/midsommar/julonyår) |           |

## Categorical Variables Codings

|                                              |                                         | Parameter |
|----------------------------------------------|-----------------------------------------|-----------|
|                                              |                                         | (22)      |
|                                              | 502300005                               | ,000      |
|                                              | 502300006                               | ,000      |
|                                              | 502300007                               | ,000      |
|                                              | 502300214                               | ,000      |
|                                              | 502300411                               | ,000      |
|                                              | 502300415                               | ,000      |
|                                              | 502300416                               | ,000      |
|                                              | 502300811                               | ,000      |
|                                              | 502300913                               | ,000      |
| weekday veckodag                             | 1 måndag                                |           |
|                                              | 2 tisdag                                |           |
|                                              | 3 onsdag                                |           |
|                                              | 4 torsdag                               |           |
|                                              | 5 fredag                                |           |
|                                              | 6 lördag                                |           |
|                                              | 7 söndag                                |           |
| season säsong/period                         | 1 januari-mars                          |           |
|                                              | 2 april-maj                             |           |
|                                              | 3 juni-augusti                          |           |
|                                              | 4 september-oktober                     |           |
|                                              | 5 november-december                     |           |
| bv3 belastning vs paoncil dubbla intervallet | 1 medelbelastning                       |           |
|                                              | 2 underbelastning                       |           |
|                                              | 3 överbelastning                        |           |
| holiday större helg                          | 1 ingen större helg                     |           |
|                                              | 2 större helg (påsk/midsommar/julonyår) |           |

## Categorical Variables Codings

|                                              |                                         | Parameter |
|----------------------------------------------|-----------------------------------------|-----------|
|                                              |                                         | (23)      |
|                                              | 502300005                               | ,000      |
|                                              | 502300006                               | ,000      |
|                                              | 502300007                               | ,000      |
|                                              | 502300214                               | ,000      |
|                                              | 502300411                               | ,000      |
|                                              | 502300415                               | ,000      |
|                                              | 502300416                               | ,000      |
|                                              | 502300811                               | ,000      |
|                                              | 502300913                               | ,000      |
| weekday veckodag                             | 1 måndag                                |           |
|                                              | 2 tisdag                                |           |
|                                              | 3 onsdag                                |           |
|                                              | 4 torsdag                               |           |
|                                              | 5 fredag                                |           |
|                                              | 6 lördag                                |           |
|                                              | 7 söndag                                |           |
| season säsong/period                         | 1 januari-mars                          |           |
|                                              | 2 april-maj                             |           |
|                                              | 3 juni-augusti                          |           |
|                                              | 4 september-oktober                     |           |
|                                              | 5 november-december                     |           |
| bv3 belasnting vs paoncil dubbla intervallet | 1 medelbelastning                       |           |
|                                              | 2 underbelastning                       |           |
|                                              | 3 överbelastning                        |           |
| holiday större helg                          | 1 ingen större helg                     |           |
|                                              | 2 större helg (påsk/midsommar/julonyår) |           |

## Categorical Variables Codings

|                                              |                                         | Parameter |
|----------------------------------------------|-----------------------------------------|-----------|
|                                              |                                         | (24)      |
|                                              | 502300005                               | ,000      |
|                                              | 502300006                               | ,000      |
|                                              | 502300007                               | ,000      |
|                                              | 502300214                               | ,000      |
|                                              | 502300411                               | ,000      |
|                                              | 502300415                               | ,000      |
|                                              | 502300416                               | ,000      |
|                                              | 502300811                               | ,000      |
|                                              | 502300913                               | ,000      |
| weekday veckodag                             | 1 måndag                                |           |
|                                              | 2 tisdag                                |           |
|                                              | 3 onsdag                                |           |
|                                              | 4 torsdag                               |           |
|                                              | 5 fredag                                |           |
|                                              | 6 lördag                                |           |
|                                              | 7 söndag                                |           |
| season säsong/period                         | 1 januari-mars                          |           |
|                                              | 2 april-maj                             |           |
|                                              | 3 juni-augusti                          |           |
|                                              | 4 september-oktober                     |           |
|                                              | 5 november-december                     |           |
| bv3 belasnting vs paoncil dubbla intervallet | 1 medelbelastning                       |           |
|                                              | 2 underbelastning                       |           |
|                                              | 3 överbelastning                        |           |
| holiday större helg                          | 1 ingen större helg                     |           |
|                                              | 2 större helg (påsk/midsommar/julonyår) |           |

## Categorical Variables Codings

|                                              |                                         | Parameter |
|----------------------------------------------|-----------------------------------------|-----------|
|                                              |                                         | (25)      |
|                                              | 502300005                               | ,000      |
|                                              | 502300006                               | ,000      |
|                                              | 502300007                               | ,000      |
|                                              | 502300214                               | ,000      |
|                                              | 502300411                               | ,000      |
|                                              | 502300415                               | ,000      |
|                                              | 502300416                               | ,000      |
|                                              | 502300811                               | ,000      |
|                                              | 502300913                               | ,000      |
| weekday veckodag                             | 1 måndag                                |           |
|                                              | 2 tisdag                                |           |
|                                              | 3 onsdag                                |           |
|                                              | 4 torsdag                               |           |
|                                              | 5 fredag                                |           |
|                                              | 6 lördag                                |           |
|                                              | 7 söndag                                |           |
| season säsong/period                         | 1 januari-mars                          |           |
|                                              | 2 april-maj                             |           |
|                                              | 3 juni-augusti                          |           |
|                                              | 4 september-oktober                     |           |
|                                              | 5 november-december                     |           |
| bv3 belasnting vs paoncil dubbla intervallet | 1 medelbelastning                       |           |
|                                              | 2 underbelastning                       |           |
|                                              | 3 överbelastning                        |           |
| holiday större helg                          | 1 ingen större helg                     |           |
|                                              | 2 större helg (påsk/midsommar/julonyår) |           |

## Categorical Variables Codings

|                                              |                                         | Parameter |
|----------------------------------------------|-----------------------------------------|-----------|
|                                              |                                         | (26)      |
|                                              | 502300005                               | ,000      |
|                                              | 502300006                               | ,000      |
|                                              | 502300007                               | ,000      |
|                                              | 502300214                               | ,000      |
|                                              | 502300411                               | ,000      |
|                                              | 502300415                               | ,000      |
|                                              | 502300416                               | ,000      |
|                                              | 502300811                               | ,000      |
|                                              | 502300913                               | ,000      |
| weekday veckodag                             | 1 måndag                                |           |
|                                              | 2 tisdag                                |           |
|                                              | 3 onsdag                                |           |
|                                              | 4 torsdag                               |           |
|                                              | 5 fredag                                |           |
|                                              | 6 lördag                                |           |
|                                              | 7 söndag                                |           |
| season säsong/period                         | 1 januari-mars                          |           |
|                                              | 2 april-maj                             |           |
|                                              | 3 juni-augusti                          |           |
|                                              | 4 september-oktober                     |           |
|                                              | 5 november-december                     |           |
| bv3 belasnting vs paoncil dubbla intervallet | 1 medelbelastning                       |           |
|                                              | 2 underbelastning                       |           |
|                                              | 3 överbelastning                        |           |
| holiday större helg                          | 1 ingen större helg                     |           |
|                                              | 2 större helg (påsk/midsommar/julonyår) |           |

## Categorical Variables Codings

|                                              |                                         | Parameter |
|----------------------------------------------|-----------------------------------------|-----------|
|                                              |                                         | (27)      |
|                                              | 502300005                               | 1,000     |
|                                              | 502300006                               | ,000      |
|                                              | 502300007                               | ,000      |
|                                              | 502300214                               | ,000      |
|                                              | 502300411                               | ,000      |
|                                              | 502300415                               | ,000      |
|                                              | 502300416                               | ,000      |
|                                              | 502300811                               | ,000      |
|                                              | 502300913                               | ,000      |
| weekday veckodag                             | 1 måndag                                |           |
|                                              | 2 tisdag                                |           |
|                                              | 3 onsdag                                |           |
|                                              | 4 torsdag                               |           |
|                                              | 5 fredag                                |           |
|                                              | 6 lördag                                |           |
|                                              | 7 söndag                                |           |
| season säsong/period                         | 1 januari-mars                          |           |
|                                              | 2 april-maj                             |           |
|                                              | 3 juni-augusti                          |           |
|                                              | 4 september-oktober                     |           |
|                                              | 5 november-december                     |           |
| bv3 belasnting vs paoncil dubbla intervallet | 1 medelbelastning                       |           |
|                                              | 2 underbelastning                       |           |
|                                              | 3 överbelastning                        |           |
| holiday större helg                          | 1 ingen större helg                     |           |
|                                              | 2 större helg (påsk/midsommar/julonyår) |           |



## Categorical Variables Codings

|                                              |                                         | Parameter |
|----------------------------------------------|-----------------------------------------|-----------|
|                                              |                                         | (28)      |
|                                              | 502300005                               | ,000      |
|                                              | 502300006                               | 1,000     |
|                                              | 502300007                               | ,000      |
|                                              | 502300214                               | ,000      |
|                                              | 502300411                               | ,000      |
|                                              | 502300415                               | ,000      |
|                                              | 502300416                               | ,000      |
|                                              | 502300811                               | ,000      |
|                                              | 502300913                               | ,000      |
| weekday veckodag                             | 1 måndag                                |           |
|                                              | 2 tisdag                                |           |
|                                              | 3 onsdag                                |           |
|                                              | 4 torsdag                               |           |
|                                              | 5 fredag                                |           |
|                                              | 6 lördag                                |           |
|                                              | 7 söndag                                |           |
| season säsong/period                         | 1 januari-mars                          |           |
|                                              | 2 april-maj                             |           |
|                                              | 3 juni-augusti                          |           |
|                                              | 4 september-oktober                     |           |
|                                              | 5 november-december                     |           |
| bv3 belasnting vs paoncil dubbla intervallet | 1 medelbelastning                       |           |
|                                              | 2 underbelastning                       |           |
|                                              | 3 överbelastning                        |           |
| holiday större helg                          | 1 ingen större helg                     |           |
|                                              | 2 större helg (påsk/midsommar/julonyår) |           |

## Categorical Variables Codings

|                                              |                                         | Parameter |
|----------------------------------------------|-----------------------------------------|-----------|
|                                              |                                         | (29)      |
|                                              | 502300005                               | ,000      |
|                                              | 502300006                               | ,000      |
|                                              | 502300007                               | 1,000     |
|                                              | 502300214                               | ,000      |
|                                              | 502300411                               | ,000      |
|                                              | 502300415                               | ,000      |
|                                              | 502300416                               | ,000      |
|                                              | 502300811                               | ,000      |
|                                              | 502300913                               | ,000      |
| weekday veckodag                             | 1 måndag                                |           |
|                                              | 2 tisdag                                |           |
|                                              | 3 onsdag                                |           |
|                                              | 4 torsdag                               |           |
|                                              | 5 fredag                                |           |
|                                              | 6 lördag                                |           |
|                                              | 7 söndag                                |           |
| season säsong/period                         | 1 januari-mars                          |           |
|                                              | 2 april-maj                             |           |
|                                              | 3 juni-augusti                          |           |
|                                              | 4 september-oktober                     |           |
|                                              | 5 november-december                     |           |
| bv3 belasnting vs paoncil dubbla intervallet | 1 medelbelastning                       |           |
|                                              | 2 underbelastning                       |           |
|                                              | 3 överbelastning                        |           |
| holiday större helg                          | 1 ingen större helg                     |           |
|                                              | 2 större helg (påsk/midsommar/julonyår) |           |

## Categorical Variables Codings

|                                              |                                         | Parameter |
|----------------------------------------------|-----------------------------------------|-----------|
|                                              |                                         | (30)      |
|                                              | 502300005                               | ,000      |
|                                              | 502300006                               | ,000      |
|                                              | 502300007                               | ,000      |
|                                              | 502300214                               | 1,000     |
|                                              | 502300411                               | ,000      |
|                                              | 502300415                               | ,000      |
|                                              | 502300416                               | ,000      |
|                                              | 502300811                               | ,000      |
|                                              | 502300913                               | ,000      |
| weekday veckodag                             | 1 måndag                                |           |
|                                              | 2 tisdag                                |           |
|                                              | 3 onsdag                                |           |
|                                              | 4 torsdag                               |           |
|                                              | 5 fredag                                |           |
|                                              | 6 lördag                                |           |
|                                              | 7 söndag                                |           |
| season säsong/period                         | 1 januari-mars                          |           |
|                                              | 2 april-maj                             |           |
|                                              | 3 juni-augusti                          |           |
|                                              | 4 september-oktober                     |           |
|                                              | 5 november-december                     |           |
| bv3 belastning vs paoncil dubbla intervallet | 1 medelbelastning                       |           |
|                                              | 2 underbelastning                       |           |
|                                              | 3 överbelastning                        |           |
| holiday större helg                          | 1 ingen större helg                     |           |
|                                              | 2 större helg (påsk/midsommar/julonyår) |           |

## Categorical Variables Codings

|                                              |                                         | Parameter |
|----------------------------------------------|-----------------------------------------|-----------|
|                                              |                                         | (31)      |
|                                              | 502300005                               | ,000      |
|                                              | 502300006                               | ,000      |
|                                              | 502300007                               | ,000      |
|                                              | 502300214                               | ,000      |
|                                              | 502300411                               | 1,000     |
|                                              | 502300415                               | ,000      |
|                                              | 502300416                               | ,000      |
|                                              | 502300811                               | ,000      |
|                                              | 502300913                               | ,000      |
| weekday veckodag                             | 1 måndag                                |           |
|                                              | 2 tisdag                                |           |
|                                              | 3 onsdag                                |           |
|                                              | 4 torsdag                               |           |
|                                              | 5 fredag                                |           |
|                                              | 6 lördag                                |           |
|                                              | 7 söndag                                |           |
| season säsong/period                         | 1 januari-mars                          |           |
|                                              | 2 april-maj                             |           |
|                                              | 3 juni-augusti                          |           |
|                                              | 4 september-oktober                     |           |
|                                              | 5 november-december                     |           |
| bv3 belastning vs paoncil dubbla intervallet | 1 medelbelastning                       |           |
|                                              | 2 underbelastning                       |           |
|                                              | 3 överbelastning                        |           |
| holiday större helg                          | 1 ingen större helg                     |           |
|                                              | 2 större helg (påsk/midsommar/julonyår) |           |

## Categorical Variables Codings

|                                              |                                         | Parameter |
|----------------------------------------------|-----------------------------------------|-----------|
|                                              |                                         | (32)      |
|                                              | 502300005                               | ,000      |
|                                              | 502300006                               | ,000      |
|                                              | 502300007                               | ,000      |
|                                              | 502300214                               | ,000      |
|                                              | 502300411                               | ,000      |
|                                              | 502300415                               | 1,000     |
|                                              | 502300416                               | ,000      |
|                                              | 502300811                               | ,000      |
|                                              | 502300913                               | ,000      |
| weekday veckodag                             | 1 måndag                                |           |
|                                              | 2 tisdag                                |           |
|                                              | 3 onsdag                                |           |
|                                              | 4 torsdag                               |           |
|                                              | 5 fredag                                |           |
|                                              | 6 lördag                                |           |
|                                              | 7 söndag                                |           |
| season säsong/period                         | 1 januari-mars                          |           |
|                                              | 2 april-maj                             |           |
|                                              | 3 juni-augusti                          |           |
|                                              | 4 september-oktober                     |           |
|                                              | 5 november-december                     |           |
| bv3 belasnting vs paoncil dubbla intervallet | 1 medelbelastning                       |           |
|                                              | 2 underbelastning                       |           |
|                                              | 3 överbelastning                        |           |
| holiday större helg                          | 1 ingen större helg                     |           |
|                                              | 2 större helg (påsk/midsommar/julonyår) |           |

## Categorical Variables Codings

|                                              |                                         | Parameter |
|----------------------------------------------|-----------------------------------------|-----------|
|                                              |                                         | (33)      |
|                                              | 502300005                               | ,000      |
|                                              | 502300006                               | ,000      |
|                                              | 502300007                               | ,000      |
|                                              | 502300214                               | ,000      |
|                                              | 502300411                               | ,000      |
|                                              | 502300415                               | ,000      |
|                                              | 502300416                               | 1,000     |
|                                              | 502300811                               | ,000      |
|                                              | 502300913                               | ,000      |
| weekday veckodag                             | 1 måndag                                |           |
|                                              | 2 tisdag                                |           |
|                                              | 3 onsdag                                |           |
|                                              | 4 torsdag                               |           |
|                                              | 5 fredag                                |           |
|                                              | 6 lördag                                |           |
|                                              | 7 söndag                                |           |
| season säsong/period                         | 1 januari-mars                          |           |
|                                              | 2 april-maj                             |           |
|                                              | 3 juni-augusti                          |           |
|                                              | 4 september-oktober                     |           |
|                                              | 5 november-december                     |           |
| bv3 belasnting vs paoncil dubbla intervallet | 1 medelbelastning                       |           |
|                                              | 2 underbelastning                       |           |
|                                              | 3 överbelastning                        |           |
| holiday större helg                          | 1 ingen större helg                     |           |
|                                              | 2 större helg (påsk/midsommar/julonyår) |           |

## Categorical Variables Codings

|                                              |                                         | Parameter |
|----------------------------------------------|-----------------------------------------|-----------|
|                                              |                                         | (34)      |
|                                              | 502300005                               | ,000      |
|                                              | 502300006                               | ,000      |
|                                              | 502300007                               | ,000      |
|                                              | 502300214                               | ,000      |
|                                              | 502300411                               | ,000      |
|                                              | 502300415                               | ,000      |
|                                              | 502300416                               | ,000      |
|                                              | 502300811                               | 1,000     |
|                                              | 502300913                               | ,000      |
| weekday veckodag                             | 1 måndag                                |           |
|                                              | 2 tisdag                                |           |
|                                              | 3 onsdag                                |           |
|                                              | 4 torsdag                               |           |
|                                              | 5 fredag                                |           |
|                                              | 6 lördag                                |           |
|                                              | 7 söndag                                |           |
| season säsong/period                         | 1 januari-mars                          |           |
|                                              | 2 april-maj                             |           |
|                                              | 3 juni-augusti                          |           |
|                                              | 4 september-oktober                     |           |
|                                              | 5 november-december                     |           |
| bv3 belastning vs paoncil dubbla intervallet | 1 medelbelastning                       |           |
|                                              | 2 underbelastning                       |           |
|                                              | 3 överbelastning                        |           |
| holiday större helg                          | 1 ingen större helg                     |           |
|                                              | 2 större helg (påsk/midsommar/julonyår) |           |

## Categorical Variables Codings

|                                              |                                         | Paramete... |
|----------------------------------------------|-----------------------------------------|-------------|
|                                              |                                         | (35)        |
|                                              | 502300005                               | ,000        |
|                                              | 502300006                               | ,000        |
|                                              | 502300007                               | ,000        |
|                                              | 502300214                               | ,000        |
|                                              | 502300411                               | ,000        |
|                                              | 502300415                               | ,000        |
|                                              | 502300416                               | ,000        |
|                                              | 502300811                               | ,000        |
|                                              | 502300913                               | 1,000       |
| weekday veckodag                             | 1 måndag                                |             |
|                                              | 2 tisdag                                |             |
|                                              | 3 onsdag                                |             |
|                                              | 4 torsdag                               |             |
|                                              | 5 fredag                                |             |
|                                              | 6 lördag                                |             |
|                                              | 7 söndag                                |             |
| season säsong/period                         | 1 januari-mars                          |             |
|                                              | 2 april-maj                             |             |
|                                              | 3 juni-augusti                          |             |
|                                              | 4 september-oktober                     |             |
|                                              | 5 november-december                     |             |
| bv3 belasnting vs paoncil dubbla intervallet | 1 medelbelastning                       |             |
|                                              | 2 underbelastning                       |             |
|                                              | 3 överbelastning                        |             |
| holiday större helg                          | 1 ingen större helg                     |             |
|                                              | 2 större helg (påsk/midsommar/julonyår) |             |

## Block 0: Beginning Block

Classification Table<sup>a,b</sup>

| Observed           |                                                    |                                                              |
|--------------------|----------------------------------------------------|--------------------------------------------------------------|
| Step 0             | seurauslt3 seuraus highest = haitta (i någon form) | 0 ingen händelse eller ei haittaa<br>1 haitta (i någon form) |
| Overall Percentage |                                                    |                                                              |



Classification Table<sup>a,b</sup>

|        |                                                    | Observed                          |                         | Predicted                  |                                   |
|--------|----------------------------------------------------|-----------------------------------|-------------------------|----------------------------|-----------------------------------|
|        |                                                    |                                   |                         | seurauslt3 seuraus highest | 0 ingen händelse eller ei haittaa |
| Step 0 | seurauslt3 seuraus highest = haitta (i någon form) | 0 ingen händelse eller ei haittaa | 1 haitta (i någon form) | 12075                      | 400                               |
|        |                                                    | Overall Percentage                |                         |                            |                                   |

Classification Table<sup>a,b</sup>

|        |                                                    | Observed                          |                         | Predicted                     |                         |
|--------|----------------------------------------------------|-----------------------------------|-------------------------|-------------------------------|-------------------------|
|        |                                                    |                                   |                         | seurauslt3 seuraus highest .. | 1 haitta (i någon form) |
| Step 0 | seurauslt3 seuraus highest = haitta (i någon form) | 0 ingen händelse eller ei haittaa | 1 haitta (i någon form) | 0                             | 0                       |
|        |                                                    | Overall Percentage                |                         |                               |                         |

Classification Table<sup>a,b</sup>

|        |                                                    | Observed                          |                         | Predicted          |    |
|--------|----------------------------------------------------|-----------------------------------|-------------------------|--------------------|----|
|        |                                                    |                                   |                         | Percentage Correct |    |
| Step 0 | seurauslt3 seuraus highest = haitta (i någon form) | 0 ingen händelse eller ei haittaa | 1 haitta (i någon form) | 100,0              | ,0 |
|        |                                                    | Overall Percentage                |                         | 96,8               |    |

a. Constant is included in the model.

b. The cut value is ,500

Variables in the Equation

|                 | B      | S.E. | Wald     | df | Sig. | Exp(B) |
|-----------------|--------|------|----------|----|------|--------|
| Step 0 Constant | -3,407 | ,051 | 4495,313 | 1  | ,000 | ,033   |

## Variables not in the Equation

|        |           |            | Score   | df | Sig. |
|--------|-----------|------------|---------|----|------|
| Step 0 | Variables | bv3        | 6,457   | 2  | ,040 |
|        |           | bv3(1)     | 5,667   | 1  | ,017 |
|        |           | bv3(2)     | 1,553   | 1  | ,213 |
|        |           | VASTY2     | 321,056 | 35 | ,000 |
|        |           | VASTY2(1)  | 1,769   | 1  | ,184 |
|        |           | VASTY2(2)  | 27,206  | 1  | ,000 |
|        |           | VASTY2(3)  | 8,562   | 1  | ,003 |
|        |           | VASTY2(4)  | ,988    | 1  | ,320 |
|        |           | VASTY2(5)  | ,587    | 1  | ,444 |
|        |           | VASTY2(6)  | 8,528   | 1  | ,003 |
|        |           | VASTY2(7)  | 2,666   | 1  | ,103 |
|        |           | VASTY2(8)  | ,008    | 1  | ,929 |
|        |           | VASTY2(9)  | 19,221  | 1  | ,000 |
|        |           | VASTY2(10) | 58,192  | 1  | ,000 |
|        |           | VASTY2(11) | 21,278  | 1  | ,000 |
|        |           | VASTY2(12) | 2,551   | 1  | ,110 |
|        |           | VASTY2(13) | 62,883  | 1  | ,000 |
|        |           | VASTY2(14) | ,045    | 1  | ,832 |
|        |           | VASTY2(15) | 8,562   | 1  | ,003 |
|        |           | VASTY2(16) | 1,322   | 1  | ,250 |
|        |           | VASTY2(17) | 2,012   | 1  | ,156 |
|        |           | VASTY2(18) | 6,791   | 1  | ,009 |
|        |           | VASTY2(19) | 10,418  | 1  | ,001 |
|        |           | VASTY2(20) | ,662    | 1  | ,416 |
|        |           | VASTY2(21) | 8,562   | 1  | ,003 |
|        |           | VASTY2(22) | 5,396   | 1  | ,020 |
|        |           | VASTY2(23) | ,045    | 1  | ,832 |
|        |           | VASTY2(24) | 5,427   | 1  | ,020 |
|        |           | VASTY2(25) | 6,092   | 1  | ,014 |
|        |           | VASTY2(26) | 7,868   | 1  | ,005 |
|        |           | VASTY2(27) | 5,427   | 1  | ,020 |
|        |           | VASTY2(28) | ,715    | 1  | ,398 |
|        |           | VASTY2(29) | 2,983   | 1  | ,084 |
|        |           | VASTY2(30) | 2,034   | 1  | ,154 |
|        |           | VASTY2(31) | 30,255  | 1  | ,000 |
|        |           | VASTY2(32) | 1,902   | 1  | ,168 |
|        |           | VASTY2(33) | 1,968   | 1  | ,161 |
|        |           | VASTY2(34) | 6,856   | 1  | ,009 |
|        |           | VASTY2(35) | ,127    | 1  | ,722 |
|        |           | weekday    | 12,260  | 6  | ,056 |
|        |           | weekday(1) | 2,946   | 1  | ,086 |
|        |           | weekday(2) | ,062    | 1  | ,804 |
|        |           | weekday(3) | ,254    | 1  | ,615 |

**Variables not in the Equation**

|                    | Score   | df | Sig. |
|--------------------|---------|----|------|
| weekday(4)         | 2,864   | 1  | ,091 |
| weekday(5)         | ,463    | 1  | ,496 |
| weekday(6)         | 7,621   | 1  | ,006 |
| holiday(1)         | 1,875   | 1  | ,171 |
| season             | 11,711  | 4  | ,020 |
| season(1)          | ,494    | 1  | ,482 |
| season(2)          | ,040    | 1  | ,842 |
| season(3)          | 3,188   | 1  | ,074 |
| season(4)          | 8,641   | 1  | ,003 |
| Overall Statistics | 348,994 | 48 | ,000 |

**Block 1: Method = Enter**

**Omnibus Tests of Model Coefficients**

|             | Chi-square | df | Sig. |
|-------------|------------|----|------|
| Step 1 Step | 325,681    | 48 | ,000 |
| Block       | 325,681    | 48 | ,000 |
| Model       | 325,681    | 48 | ,000 |

**Model Summary**

| Step | -2 Log likelihood     | Cox & Snell R Square | Nagelkerke R Square |
|------|-----------------------|----------------------|---------------------|
| 1    | 3213,368 <sup>a</sup> | ,026                 | ,104                |

a. Estimation terminated at iteration number 9 because parameter estimates changed by less than ,001.

**Classification Table<sup>a</sup>**

| Observed           |                                                    |                                                              |
|--------------------|----------------------------------------------------|--------------------------------------------------------------|
| Step 1             | seurauslt3 seuraus highest = haitta (i någon form) | 0 ingen händelse eller ei haittaa<br>1 haitta (i någon form) |
| Overall Percentage |                                                    |                                                              |

Classification Table<sup>a</sup>

| Observed           |                                                    | Predicted                         |                                   |
|--------------------|----------------------------------------------------|-----------------------------------|-----------------------------------|
|                    |                                                    | seurauslt3 seuraus highest        | 0 ingen händelse eller ei haittaa |
| Step 1             | seurauslt3 seuraus highest = haitta (i någon form) | 0 ingen händelse eller ei haittaa | 12075                             |
|                    |                                                    | 1 haitta (i någon form)           | 400                               |
| Overall Percentage |                                                    |                                   |                                   |

Classification Table<sup>a</sup>

| Observed           |                                                    | Predicted                         |                         |
|--------------------|----------------------------------------------------|-----------------------------------|-------------------------|
|                    |                                                    | seurauslt3 seuraus highest ..     | 1 haitta (i någon form) |
| Step 1             | seurauslt3 seuraus highest = haitta (i någon form) | 0 ingen händelse eller ei haittaa | 0                       |
|                    |                                                    | 1 haitta (i någon form)           | 0                       |
| Overall Percentage |                                                    |                                   |                         |

Classification Table<sup>a</sup>

| Observed           |                                                    | Predicted                         |       |
|--------------------|----------------------------------------------------|-----------------------------------|-------|
|                    |                                                    | Percentage Correct                |       |
| Step 1             | seurauslt3 seuraus highest = haitta (i någon form) | 0 ingen händelse eller ei haittaa | 100,0 |
|                    |                                                    | 1 haitta (i någon form)           | ,0    |
| Overall Percentage |                                                    |                                   | 96,8  |

a. The cut value is ,500

## Variables in the Equation

|                         | B      | S.E.  | Wald    | df | Sig. | Exp(B) |
|-------------------------|--------|-------|---------|----|------|--------|
| Step 1 <sup>a</sup> bv3 |        |       | ,731    | 2  | ,694 |        |
| bv3(1)                  | -,092  | ,199  | ,217    | 1  | ,642 | ,912   |
| bv3(2)                  | ,098   | ,150  | ,425    | 1  | ,515 | 1,103  |
| VASTY2                  |        |       | 232,872 | 35 | ,000 |        |
| VASTY2(1)               | ,612   | ,424  | 2,082   | 1  | ,149 | 1,845  |
| VASTY2(2)               | 1,227  | ,390  | 9,912   | 1  | ,002 | 3,410  |
| VASTY2(3)               | -1,569 | ,788  | 3,967   | 1  | ,046 | ,208   |
| VASTY2(4)               | ,493   | ,431  | 1,308   | 1  | ,253 | 1,638  |
| VASTY2(5)               | ,474   | ,441  | 1,155   | 1  | ,282 | 1,607  |
| VASTY2(6)               | -1,552 | ,787  | 3,889   | 1  | ,049 | ,212   |
| VASTY2(7)               | ,608   | ,428  | 2,019   | 1  | ,155 | 1,838  |
| VASTY2(8)               | ,284   | ,448  | ,403    | 1  | ,526 | 1,329  |
| VASTY2(9)               | 1,128  | ,398  | 8,050   | 1  | ,005 | 3,089  |
| VASTY2(10)              | 1,491  | ,380  | 15,384  | 1  | ,000 | 4,443  |
| VASTY2(11)              | 1,147  | ,393  | 8,514   | 1  | ,004 | 3,149  |
| VASTY2(12)              | ,651   | ,420  | 2,406   | 1  | ,121 | 1,918  |
| VASTY2(13)              | 1,504  | ,381  | 15,606  | 1  | ,000 | 4,498  |
| VASTY2(14)              | ,191   | ,457  | ,175    | 1  | ,676 | 1,210  |
| VASTY2(15)              | -1,536 | ,786  | 3,821   | 1  | ,051 | ,215   |
| VASTY2(16)              | -,508  | ,676  | ,566    | 1  | ,452 | ,601   |
| VASTY2(17)              | -,260  | ,510  | ,259    | 1  | ,610 | ,771   |
| VASTY2(18)              | -1,115 | ,672  | 2,758   | 1  | ,097 | ,328   |
| VASTY2(19)              | -2,166 | 1,063 | 4,150   | 1  | ,042 | ,115   |
| VASTY2(20)              | ,452   | ,451  | 1,005   | 1  | ,316 | 1,572  |
| VASTY2(21)              | -1,533 | ,786  | 3,809   | 1  | ,051 | ,216   |
| VASTY2(22)              | -,815  | ,606  | 1,808   | 1  | ,179 | ,443   |
| VASTY2(23)              | ,194   | ,456  | ,181    | 1  | ,671 | 1,214  |
| VASTY2(24)              | -,876  | ,607  | 2,081   | 1  | ,149 | ,416   |
| VASTY2(25)              | -1,332 | ,786  | 2,870   | 1  | ,090 | ,264   |
| VASTY2(26)              | -2,045 | 1,058 | 3,740   | 1  | ,053 | ,129   |
| VASTY2(27)              | -,862  | ,607  | 2,020   | 1  | ,155 | ,422   |
| VASTY2(28)              | -,121  | ,566  | ,045    | 1  | ,831 | ,886   |
| VASTY2(29)              | -,445  | ,533  | ,698    | 1  | ,403 | ,641   |
| VASTY2(30)              | -,289  | ,510  | ,322    | 1  | ,571 | ,749   |
| VASTY2(31)              | 1,242  | ,392  | 10,069  | 1  | ,002 | 3,464  |
| VASTY2(32)              | -,249  | ,513  | ,235    | 1  | ,628 | ,780   |
| VASTY2(33)              | -,262  | ,512  | ,262    | 1  | ,609 | ,770   |
| VASTY2(34)              | -1,136 | ,671  | 2,866   | 1  | ,090 | ,321   |
| VASTY2(35)              | ,084   | ,482  | ,031    | 1  | ,861 | 1,088  |
| weekday                 |        |       | 12,421  | 6  | ,053 |        |
| weekday(1)              | ,223   | ,185  | 1,455   | 1  | ,228 | 1,250  |
| weekday(2)              | -,019  | ,195  | ,009    | 1  | ,923 | ,981   |

## Variables in the Equation

|                     |            | 95% C.I. for EXP(B) |       |
|---------------------|------------|---------------------|-------|
|                     |            | Lower               | Upper |
| Step 1 <sup>a</sup> | bv3        |                     |       |
|                     | bv3(1)     | ,618                | 1,346 |
|                     | bv3(2)     | ,821                | 1,481 |
|                     | VASTY2     |                     |       |
|                     | VASTY2(1)  | ,803                | 4,237 |
|                     | VASTY2(2)  | 1,589               | 7,319 |
|                     | VASTY2(3)  | ,044                | ,975  |
|                     | VASTY2(4)  | ,703                | 3,815 |
|                     | VASTY2(5)  | ,677                | 3,818 |
|                     | VASTY2(6)  | ,045                | ,990  |
|                     | VASTY2(7)  | ,794                | 4,254 |
|                     | VASTY2(8)  | ,552                | 3,197 |
|                     | VASTY2(9)  | 1,417               | 6,734 |
|                     | VASTY2(10) | 2,109               | 9,362 |
|                     | VASTY2(11) | 1,457               | 6,805 |
|                     | VASTY2(12) | ,842                | 4,365 |
|                     | VASTY2(13) | 2,133               | 9,483 |
|                     | VASTY2(14) | ,495                | 2,962 |
|                     | VASTY2(15) | ,046                | 1,004 |
|                     | VASTY2(16) | ,160                | 2,262 |
|                     | VASTY2(17) | ,284                | 2,096 |
|                     | VASTY2(18) | ,088                | 1,223 |
|                     | VASTY2(19) | ,014                | ,921  |
|                     | VASTY2(20) | ,649                | 3,803 |
|                     | VASTY2(21) | ,046                | 1,007 |
|                     | VASTY2(22) | ,135                | 1,452 |
|                     | VASTY2(23) | ,496                | 2,970 |
|                     | VASTY2(24) | ,127                | 1,369 |
|                     | VASTY2(25) | ,057                | 1,232 |
|                     | VASTY2(26) | ,016                | 1,028 |
|                     | VASTY2(27) | ,129                | 1,387 |
|                     | VASTY2(28) | ,292                | 2,689 |
|                     | VASTY2(29) | ,225                | 1,821 |
|                     | VASTY2(30) | ,275                | 2,035 |
|                     | VASTY2(31) | 1,608               | 7,462 |
|                     | VASTY2(32) | ,285                | 2,132 |
|                     | VASTY2(33) | ,282                | 2,099 |
|                     | VASTY2(34) | ,086                | 1,196 |
|                     | VASTY2(35) | ,423                | 2,800 |
|                     | weekday    |                     |       |
|                     | weekday(1) | ,870                | 1,798 |
|                     | weekday(2) | ,670                | 1,437 |

Variables in the Equation

|            | B      | S.E. | Wald   | df | Sig. | Exp(B) |
|------------|--------|------|--------|----|------|--------|
| weekday(3) | ,077   | ,191 | ,163   | 1  | ,686 | 1,080  |
| weekday(4) | ,232   | ,186 | 1,562  | 1  | ,211 | 1,262  |
| weekday(5) | -,065  | ,200 | ,107   | 1  | ,743 | ,937   |
| weekday(6) | -,406  | ,218 | 3,482  | 1  | ,062 | ,666   |
| holiday(1) | -,479  | ,373 | 1,657  | 1  | ,198 | ,619   |
| season     |        |      | 10,360 | 4  | ,035 |        |
| season(1)  | -,209  | ,162 | 1,666  | 1  | ,197 | ,811   |
| season(2)  | -,106  | ,146 | ,527   | 1  | ,468 | ,900   |
| season(3)  | ,067   | ,150 | ,200   | 1  | ,655 | 1,070  |
| season(4)  | -,489  | ,181 | 7,323  | 1  | ,007 | ,613   |
| Constant   | -3,562 | ,371 | 92,066 | 1  | ,000 | ,028   |

Variables in the Equation

|            | 95% C.I. for EXP(B) |       |
|------------|---------------------|-------|
|            | Lower               | Upper |
| weekday(3) | ,743                | 1,571 |
| weekday(4) | ,876                | 1,816 |
| weekday(5) | ,634                | 1,385 |
| weekday(6) | ,435                | 1,021 |
| holiday(1) | ,298                | 1,285 |
| season     |                     |       |
| season(1)  | ,590                | 1,115 |
| season(2)  | ,676                | 1,197 |
| season(3)  | ,796                | 1,436 |
| season(4)  | ,430                | ,874  |
| Constant   |                     |       |

a. Variable(s) entered on step 1: bv3, VASTY2, weekday, holiday, season.

```
LOGISTIC REGRESSION VARIABLES seurauslt3
/METHOD=ENTER sv3 VASTY2 weekday holiday season
/CONTRAST (sv3)=Indicator(1)
/CONTRAST (VASTY2)=Indicator(1)
/CONTRAST (weekday)=Indicator(1)
/CONTRAST (holiday)=Indicator(1)
/CONTRAST (season)=Indicator(1)
/PRINT=CI(95)
/CRITERIA=PIN(0.05) POUT(0.10) ITERATE(20) CUT(0.5).
```

## Logistic Regression

[DataSet6] C:\cWordjan\Rafaela\_VCS\alla\_tillsammans\abo\_bjo\_vasa\_v1.sav

1  
2  
3  
4 **Case Processing Summary**

| Unweighted Cases <sup>a</sup> |                      | N     | Percent |
|-------------------------------|----------------------|-------|---------|
| Selected Cases                | Included in Analysis | 12475 | 100,0   |
|                               | Missing Cases        | 0     | ,0      |
|                               | Total                | 12475 | 100,0   |
| Unselected Cases              |                      | 0     | ,0      |
| Total                         |                      | 12475 | 100,0   |

5  
6  
7  
8  
9  
10  
11  
12  
13 a. If weight is in effect, see classification table for the total number of cases.

14  
15  
16 **Dependent Variable Encoding**

| Original Value                    | Internal Value |
|-----------------------------------|----------------|
| 0 ingen händelse eller ei haittaa | 0              |
| 1 haitta (i någon form)           | 1              |

17  
18  
19  
20  
21  
22 **Categorical Variables Codings**

|                           | Frequency | Parameter |
|---------------------------|-----------|-----------|
|                           |           | (1)       |
| VASTY2 (SAIR*10000)+VASTY | 365       | ,000      |
| 403073101                 | 362       | 1,000     |
| 403073102                 | 365       | ,000      |
| 403073103                 | 365       | ,000      |
| 403073202                 | 365       | ,000      |
| 403073203                 | 365       | ,000      |
| 403073204                 | 330       | ,000      |
| 403073303                 | 364       | ,000      |
| 403073651                 | 362       | ,000      |
| 403073771                 | 365       | ,000      |
| 403133102                 | 341       | ,000      |
| 403133106                 | 365       | ,000      |
| 403133107                 | 365       | ,000      |
| 403133109                 | 365       | ,000      |
| 403133202                 | 365       | ,000      |
| 403133203                 | 365       | ,000      |
| 403133204                 | 365       | ,000      |
| 403133315                 | 177       | ,000      |
| 403133322                 | 365       | ,000      |
| 403133401                 | 362       | ,000      |
| 403133402                 | 365       | ,000      |
| 403133550                 | 298       | ,000      |
| 403133772                 | 365       | ,000      |
| 403135803                 | 365       | ,000      |
| 404060001                 | 365       | ,000      |
| 404060002                 | 366       | ,000      |
| 404310003                 | 291       | ,000      |
| 404310004                 | 291       | ,000      |



1  
2  
3  
4  
5  
6  
7  
8  
9  
10  
11  
12  
13  
14  
15  
16  
17  
18  
19  
20  
21  
22  
23  
24  
25  
26  
27  
28  
29  
30  
31  
32  
33  
34  
35  
36  
37  
38  
39  
40  
41  
42  
43  
44  
45  
46  
47  
48  
49  
50  
51  
52  
53  
54  
55  
56  
57  
58  
59  
60

**Categorical Variables Codings**

|                           |           | Parameter coding |       |
|---------------------------|-----------|------------------|-------|
|                           |           | (2)              | (3)   |
| VASTY2 (SAIR*10000)+VASTY | 403073101 | ,000             | ,000  |
|                           | 403073102 | ,000             | ,000  |
|                           | 403073103 | 1,000            | ,000  |
|                           | 403073202 | ,000             | 1,000 |
|                           | 403073203 | ,000             | ,000  |
|                           | 403073204 | ,000             | ,000  |
|                           | 403073303 | ,000             | ,000  |
|                           | 403073651 | ,000             | ,000  |
|                           | 403073771 | ,000             | ,000  |
|                           | 403133102 | ,000             | ,000  |
|                           | 403133106 | ,000             | ,000  |
|                           | 403133107 | ,000             | ,000  |
|                           | 403133109 | ,000             | ,000  |
|                           | 403133202 | ,000             | ,000  |
|                           | 403133203 | ,000             | ,000  |
|                           | 403133204 | ,000             | ,000  |
|                           | 403133315 | ,000             | ,000  |
|                           | 403133322 | ,000             | ,000  |
|                           | 403133401 | ,000             | ,000  |
|                           | 403133402 | ,000             | ,000  |
|                           | 403133550 | ,000             | ,000  |
|                           | 403133772 | ,000             | ,000  |
|                           | 403135803 | ,000             | ,000  |
|                           | 404060001 | ,000             | ,000  |
|                           | 404060002 | ,000             | ,000  |
|                           | 404310003 | ,000             | ,000  |
|                           | 404310004 | ,000             | ,000  |

## Categorical Variables Codings

|                           |           | Parameter coding |       |
|---------------------------|-----------|------------------|-------|
|                           |           | (4)              | (5)   |
| VASTY2 (SAIR*10000)+VASTY | 403073101 | ,000             | ,000  |
|                           | 403073102 | ,000             | ,000  |
|                           | 403073103 | ,000             | ,000  |
|                           | 403073202 | ,000             | ,000  |
|                           | 403073203 | 1,000            | ,000  |
|                           | 403073204 | ,000             | 1,000 |
|                           | 403073303 | ,000             | ,000  |
|                           | 403073651 | ,000             | ,000  |
|                           | 403073771 | ,000             | ,000  |
|                           | 403133102 | ,000             | ,000  |
|                           | 403133106 | ,000             | ,000  |
|                           | 403133107 | ,000             | ,000  |
|                           | 403133109 | ,000             | ,000  |
|                           | 403133202 | ,000             | ,000  |
|                           | 403133203 | ,000             | ,000  |
|                           | 403133204 | ,000             | ,000  |
|                           | 403133315 | ,000             | ,000  |
|                           | 403133322 | ,000             | ,000  |
|                           | 403133401 | ,000             | ,000  |
|                           | 403133402 | ,000             | ,000  |
|                           | 403133550 | ,000             | ,000  |
|                           | 403133772 | ,000             | ,000  |
|                           | 403135803 | ,000             | ,000  |
|                           | 404060001 | ,000             | ,000  |
|                           | 404060002 | ,000             | ,000  |
|                           | 404310003 | ,000             | ,000  |
|                           | 404310004 | ,000             | ,000  |

**Categorical Variables Codings**

|                           |           | Parameter coding |       |
|---------------------------|-----------|------------------|-------|
|                           |           | (6)              | (7)   |
| VASTY2 (SAIR*10000)+VASTY | 403073101 | ,000             | ,000  |
|                           | 403073102 | ,000             | ,000  |
|                           | 403073103 | ,000             | ,000  |
|                           | 403073202 | ,000             | ,000  |
|                           | 403073203 | ,000             | ,000  |
|                           | 403073204 | ,000             | ,000  |
|                           | 403073303 | 1,000            | ,000  |
|                           | 403073651 | ,000             | 1,000 |
|                           | 403073771 | ,000             | ,000  |
|                           | 403133102 | ,000             | ,000  |
|                           | 403133106 | ,000             | ,000  |
|                           | 403133107 | ,000             | ,000  |
|                           | 403133109 | ,000             | ,000  |
|                           | 403133202 | ,000             | ,000  |
|                           | 403133203 | ,000             | ,000  |
|                           | 403133204 | ,000             | ,000  |
|                           | 403133315 | ,000             | ,000  |
|                           | 403133322 | ,000             | ,000  |
|                           | 403133401 | ,000             | ,000  |
|                           | 403133402 | ,000             | ,000  |
|                           | 403133550 | ,000             | ,000  |
|                           | 403133772 | ,000             | ,000  |
|                           | 403135803 | ,000             | ,000  |
|                           | 404060001 | ,000             | ,000  |
|                           | 404060002 | ,000             | ,000  |
|                           | 404310003 | ,000             | ,000  |
|                           | 404310004 | ,000             | ,000  |

BMJ

## Categorical Variables Codings

|                           |           | Parameter coding |       |
|---------------------------|-----------|------------------|-------|
|                           |           | (8)              | (9)   |
| VASTY2 (SAIR*10000)+VASTY | 403073101 | ,000             | ,000  |
|                           | 403073102 | ,000             | ,000  |
|                           | 403073103 | ,000             | ,000  |
|                           | 403073202 | ,000             | ,000  |
|                           | 403073203 | ,000             | ,000  |
|                           | 403073204 | ,000             | ,000  |
|                           | 403073303 | ,000             | ,000  |
|                           | 403073651 | ,000             | ,000  |
|                           | 403073771 | 1,000            | ,000  |
|                           | 403133102 | ,000             | 1,000 |
|                           | 403133106 | ,000             | ,000  |
|                           | 403133107 | ,000             | ,000  |
|                           | 403133109 | ,000             | ,000  |
|                           | 403133202 | ,000             | ,000  |
|                           | 403133203 | ,000             | ,000  |
|                           | 403133204 | ,000             | ,000  |
|                           | 403133315 | ,000             | ,000  |
|                           | 403133322 | ,000             | ,000  |
|                           | 403133401 | ,000             | ,000  |
|                           | 403133402 | ,000             | ,000  |
|                           | 403133550 | ,000             | ,000  |
|                           | 403133772 | ,000             | ,000  |
|                           | 403135803 | ,000             | ,000  |
|                           | 404060001 | ,000             | ,000  |
|                           | 404060002 | ,000             | ,000  |
|                           | 404310003 | ,000             | ,000  |
|                           | 404310004 | ,000             | ,000  |

## Categorical Variables Codings

|                           |           | Parameter coding |       |
|---------------------------|-----------|------------------|-------|
|                           |           | (10)             | (11)  |
| VASTY2 (SAIR*10000)+VASTY | 403073101 | ,000             | ,000  |
|                           | 403073102 | ,000             | ,000  |
|                           | 403073103 | ,000             | ,000  |
|                           | 403073202 | ,000             | ,000  |
|                           | 403073203 | ,000             | ,000  |
|                           | 403073204 | ,000             | ,000  |
|                           | 403073303 | ,000             | ,000  |
|                           | 403073651 | ,000             | ,000  |
|                           | 403073771 | ,000             | ,000  |
|                           | 403133102 | ,000             | ,000  |
|                           | 403133106 | 1,000            | ,000  |
|                           | 403133107 | ,000             | 1,000 |
|                           | 403133109 | ,000             | ,000  |
|                           | 403133202 | ,000             | ,000  |
|                           | 403133203 | ,000             | ,000  |
|                           | 403133204 | ,000             | ,000  |
|                           | 403133315 | ,000             | ,000  |
|                           | 403133322 | ,000             | ,000  |
|                           | 403133401 | ,000             | ,000  |
|                           | 403133402 | ,000             | ,000  |
|                           | 403133550 | ,000             | ,000  |
|                           | 403133772 | ,000             | ,000  |
|                           | 403135803 | ,000             | ,000  |
|                           | 404060001 | ,000             | ,000  |
|                           | 404060002 | ,000             | ,000  |
|                           | 404310003 | ,000             | ,000  |
|                           | 404310004 | ,000             | ,000  |

## Categorical Variables Codings

|                           |           | Parameter coding |       |
|---------------------------|-----------|------------------|-------|
|                           |           | (12)             | (13)  |
| VASTY2 (SAIR*10000)+VASTY | 403073101 | ,000             | ,000  |
|                           | 403073102 | ,000             | ,000  |
|                           | 403073103 | ,000             | ,000  |
|                           | 403073202 | ,000             | ,000  |
|                           | 403073203 | ,000             | ,000  |
|                           | 403073204 | ,000             | ,000  |
|                           | 403073303 | ,000             | ,000  |
|                           | 403073651 | ,000             | ,000  |
|                           | 403073771 | ,000             | ,000  |
|                           | 403133102 | ,000             | ,000  |
|                           | 403133106 | ,000             | ,000  |
|                           | 403133107 | ,000             | ,000  |
|                           | 403133109 | 1,000            | ,000  |
|                           | 403133202 | ,000             | 1,000 |
|                           | 403133203 | ,000             | ,000  |
|                           | 403133204 | ,000             | ,000  |
|                           | 403133315 | ,000             | ,000  |
|                           | 403133322 | ,000             | ,000  |
|                           | 403133401 | ,000             | ,000  |
|                           | 403133402 | ,000             | ,000  |
|                           | 403133550 | ,000             | ,000  |
|                           | 403133772 | ,000             | ,000  |
|                           | 403135803 | ,000             | ,000  |
|                           | 404060001 | ,000             | ,000  |
|                           | 404060002 | ,000             | ,000  |
|                           | 404310003 | ,000             | ,000  |
|                           | 404310004 | ,000             | ,000  |

1  
2  
3  
4  
5  
6  
7  
8  
9  
10  
11  
12  
13  
14  
15  
16  
17  
18  
19  
20  
21  
22  
23  
24  
25  
26  
27  
28  
29  
30  
31  
32  
33  
34  
35  
36  
37  
38  
39  
40  
41  
42  
43  
44  
45  
46  
47  
48  
49  
50  
51  
52  
53  
54  
55  
56  
57  
58  
59  
60

**Categorical Variables Codings**

|                           |           | Parameter coding |       |
|---------------------------|-----------|------------------|-------|
|                           |           | (14)             | (15)  |
| VASTY2 (SAIR*10000)+VASTY | 403073101 | ,000             | ,000  |
|                           | 403073102 | ,000             | ,000  |
|                           | 403073103 | ,000             | ,000  |
|                           | 403073202 | ,000             | ,000  |
|                           | 403073203 | ,000             | ,000  |
|                           | 403073204 | ,000             | ,000  |
|                           | 403073303 | ,000             | ,000  |
|                           | 403073651 | ,000             | ,000  |
|                           | 403073771 | ,000             | ,000  |
|                           | 403133102 | ,000             | ,000  |
|                           | 403133106 | ,000             | ,000  |
|                           | 403133107 | ,000             | ,000  |
|                           | 403133109 | ,000             | ,000  |
|                           | 403133202 | ,000             | ,000  |
|                           | 403133203 | 1,000            | ,000  |
|                           | 403133204 | ,000             | 1,000 |
|                           | 403133315 | ,000             | ,000  |
|                           | 403133322 | ,000             | ,000  |
|                           | 403133401 | ,000             | ,000  |
|                           | 403133402 | ,000             | ,000  |
|                           | 403133550 | ,000             | ,000  |
|                           | 403133772 | ,000             | ,000  |
|                           | 403135803 | ,000             | ,000  |
|                           | 404060001 | ,000             | ,000  |
|                           | 404060002 | ,000             | ,000  |
|                           | 404310003 | ,000             | ,000  |
|                           | 404310004 | ,000             | ,000  |

## Categorical Variables Codings

|                           |           | Parameter coding |       |
|---------------------------|-----------|------------------|-------|
|                           |           | (16)             | (17)  |
| VASTY2 (SAIR*10000)+VASTY | 403073101 | ,000             | ,000  |
|                           | 403073102 | ,000             | ,000  |
|                           | 403073103 | ,000             | ,000  |
|                           | 403073202 | ,000             | ,000  |
|                           | 403073203 | ,000             | ,000  |
|                           | 403073204 | ,000             | ,000  |
|                           | 403073303 | ,000             | ,000  |
|                           | 403073651 | ,000             | ,000  |
|                           | 403073771 | ,000             | ,000  |
|                           | 403133102 | ,000             | ,000  |
|                           | 403133106 | ,000             | ,000  |
|                           | 403133107 | ,000             | ,000  |
|                           | 403133109 | ,000             | ,000  |
|                           | 403133202 | ,000             | ,000  |
|                           | 403133203 | ,000             | ,000  |
|                           | 403133204 | ,000             | ,000  |
|                           | 403133315 | 1,000            | ,000  |
|                           | 403133322 | ,000             | 1,000 |
|                           | 403133401 | ,000             | ,000  |
|                           | 403133402 | ,000             | ,000  |
|                           | 403133550 | ,000             | ,000  |
|                           | 403133772 | ,000             | ,000  |
|                           | 403135803 | ,000             | ,000  |
|                           | 404060001 | ,000             | ,000  |
|                           | 404060002 | ,000             | ,000  |
|                           | 404310003 | ,000             | ,000  |
|                           | 404310004 | ,000             | ,000  |



## Categorical Variables Codings

|                           |           | Parameter coding |       |
|---------------------------|-----------|------------------|-------|
|                           |           | (18)             | (19)  |
| VASTY2 (SAIR*10000)+VASTY | 403073101 | ,000             | ,000  |
|                           | 403073102 | ,000             | ,000  |
|                           | 403073103 | ,000             | ,000  |
|                           | 403073202 | ,000             | ,000  |
|                           | 403073203 | ,000             | ,000  |
|                           | 403073204 | ,000             | ,000  |
|                           | 403073303 | ,000             | ,000  |
|                           | 403073651 | ,000             | ,000  |
|                           | 403073771 | ,000             | ,000  |
|                           | 403133102 | ,000             | ,000  |
|                           | 403133106 | ,000             | ,000  |
|                           | 403133107 | ,000             | ,000  |
|                           | 403133109 | ,000             | ,000  |
|                           | 403133202 | ,000             | ,000  |
|                           | 403133203 | ,000             | ,000  |
|                           | 403133204 | ,000             | ,000  |
|                           | 403133315 | ,000             | ,000  |
|                           | 403133322 | ,000             | ,000  |
|                           | 403133401 | 1,000            | ,000  |
|                           | 403133402 | ,000             | 1,000 |
|                           | 403133550 | ,000             | ,000  |
|                           | 403133772 | ,000             | ,000  |
|                           | 403135803 | ,000             | ,000  |
|                           | 404060001 | ,000             | ,000  |
|                           | 404060002 | ,000             | ,000  |
|                           | 404310003 | ,000             | ,000  |
|                           | 404310004 | ,000             | ,000  |

## Categorical Variables Codings

|                           |           | Parameter coding |       |
|---------------------------|-----------|------------------|-------|
|                           |           | (20)             | (21)  |
| VASTY2 (SAIR*10000)+VASTY | 403073101 | ,000             | ,000  |
|                           | 403073102 | ,000             | ,000  |
|                           | 403073103 | ,000             | ,000  |
|                           | 403073202 | ,000             | ,000  |
|                           | 403073203 | ,000             | ,000  |
|                           | 403073204 | ,000             | ,000  |
|                           | 403073303 | ,000             | ,000  |
|                           | 403073651 | ,000             | ,000  |
|                           | 403073771 | ,000             | ,000  |
|                           | 403133102 | ,000             | ,000  |
|                           | 403133106 | ,000             | ,000  |
|                           | 403133107 | ,000             | ,000  |
|                           | 403133109 | ,000             | ,000  |
|                           | 403133202 | ,000             | ,000  |
|                           | 403133203 | ,000             | ,000  |
|                           | 403133204 | ,000             | ,000  |
|                           | 403133315 | ,000             | ,000  |
|                           | 403133322 | ,000             | ,000  |
|                           | 403133401 | ,000             | ,000  |
|                           | 403133402 | ,000             | ,000  |
|                           | 403133550 | 1,000            | ,000  |
|                           | 403133772 | ,000             | 1,000 |
|                           | 403135803 | ,000             | ,000  |
|                           | 404060001 | ,000             | ,000  |
|                           | 404060002 | ,000             | ,000  |
|                           | 404310003 | ,000             | ,000  |
|                           | 404310004 | ,000             | ,000  |

**Categorical Variables Codings**

|                           |           | Parameter coding |       |
|---------------------------|-----------|------------------|-------|
|                           |           | (22)             | (23)  |
| VASTY2 (SAIR*10000)+VASTY | 403073101 | ,000             | ,000  |
|                           | 403073102 | ,000             | ,000  |
|                           | 403073103 | ,000             | ,000  |
|                           | 403073202 | ,000             | ,000  |
|                           | 403073203 | ,000             | ,000  |
|                           | 403073204 | ,000             | ,000  |
|                           | 403073303 | ,000             | ,000  |
|                           | 403073651 | ,000             | ,000  |
|                           | 403073771 | ,000             | ,000  |
|                           | 403133102 | ,000             | ,000  |
|                           | 403133106 | ,000             | ,000  |
|                           | 403133107 | ,000             | ,000  |
|                           | 403133109 | ,000             | ,000  |
|                           | 403133202 | ,000             | ,000  |
|                           | 403133203 | ,000             | ,000  |
|                           | 403133204 | ,000             | ,000  |
|                           | 403133315 | ,000             | ,000  |
|                           | 403133322 | ,000             | ,000  |
|                           | 403133401 | ,000             | ,000  |
|                           | 403133402 | ,000             | ,000  |
|                           | 403133550 | ,000             | ,000  |
|                           | 403133772 | ,000             | ,000  |
|                           | 403135803 | 1,000            | ,000  |
|                           | 404060001 | ,000             | 1,000 |
|                           | 404060002 | ,000             | ,000  |
|                           | 404310003 | ,000             | ,000  |
|                           | 404310004 | ,000             | ,000  |

BMJ

## Categorical Variables Codings

|                           |           | Parameter coding |       |
|---------------------------|-----------|------------------|-------|
|                           |           | (24)             | (25)  |
| VASTY2 (SAIR*10000)+VASTY | 403073101 | ,000             | ,000  |
|                           | 403073102 | ,000             | ,000  |
|                           | 403073103 | ,000             | ,000  |
|                           | 403073202 | ,000             | ,000  |
|                           | 403073203 | ,000             | ,000  |
|                           | 403073204 | ,000             | ,000  |
|                           | 403073303 | ,000             | ,000  |
|                           | 403073651 | ,000             | ,000  |
|                           | 403073771 | ,000             | ,000  |
|                           | 403133102 | ,000             | ,000  |
|                           | 403133106 | ,000             | ,000  |
|                           | 403133107 | ,000             | ,000  |
|                           | 403133109 | ,000             | ,000  |
|                           | 403133202 | ,000             | ,000  |
|                           | 403133203 | ,000             | ,000  |
|                           | 403133204 | ,000             | ,000  |
|                           | 403133315 | ,000             | ,000  |
|                           | 403133322 | ,000             | ,000  |
|                           | 403133401 | ,000             | ,000  |
|                           | 403133402 | ,000             | ,000  |
|                           | 403133550 | ,000             | ,000  |
|                           | 403133772 | ,000             | ,000  |
|                           | 403135803 | ,000             | ,000  |
|                           | 404060001 | ,000             | ,000  |
|                           | 404060002 | 1,000            | ,000  |
|                           | 404310003 | ,000             | 1,000 |
|                           | 404310004 | ,000             | ,000  |

1  
2  
3  
4  
5  
6  
7  
8  
9  
10  
11  
12  
13  
14  
15  
16  
17  
18  
19  
20  
21  
22  
23  
24  
25  
26  
27  
28  
29  
30  
31  
32  
33  
34  
35  
36  
37  
38  
39  
40  
41  
42  
43  
44  
45  
46  
47  
48  
49  
50  
51  
52  
53  
54  
55  
56  
57  
58  
59  
60

**Categorical Variables Codings**

|                           |           | Parameter coding |      |
|---------------------------|-----------|------------------|------|
|                           |           | (26)             | (27) |
| VASTY2 (SAIR*10000)+VASTY | 403073101 | ,000             | ,000 |
|                           | 403073102 | ,000             | ,000 |
|                           | 403073103 | ,000             | ,000 |
|                           | 403073202 | ,000             | ,000 |
|                           | 403073203 | ,000             | ,000 |
|                           | 403073204 | ,000             | ,000 |
|                           | 403073303 | ,000             | ,000 |
|                           | 403073651 | ,000             | ,000 |
|                           | 403073771 | ,000             | ,000 |
|                           | 403133102 | ,000             | ,000 |
|                           | 403133106 | ,000             | ,000 |
|                           | 403133107 | ,000             | ,000 |
|                           | 403133109 | ,000             | ,000 |
|                           | 403133202 | ,000             | ,000 |
|                           | 403133203 | ,000             | ,000 |
|                           | 403133204 | ,000             | ,000 |
|                           | 403133315 | ,000             | ,000 |
|                           | 403133322 | ,000             | ,000 |
|                           | 403133401 | ,000             | ,000 |
|                           | 403133402 | ,000             | ,000 |
|                           | 403133550 | ,000             | ,000 |
|                           | 403133772 | ,000             | ,000 |
|                           | 403135803 | ,000             | ,000 |
|                           | 404060001 | ,000             | ,000 |
|                           | 404060002 | ,000             | ,000 |
|                           | 404310003 | ,000             | ,000 |
|                           | 404310004 | 1,000            | ,000 |

## Categorical Variables Codings

|                           |           | Parameter coding |      |
|---------------------------|-----------|------------------|------|
|                           |           | (28)             | (29) |
| VASTY2 (SAIR*10000)+VASTY | 403073101 | ,000             | ,000 |
|                           | 403073102 | ,000             | ,000 |
|                           | 403073103 | ,000             | ,000 |
|                           | 403073202 | ,000             | ,000 |
|                           | 403073203 | ,000             | ,000 |
|                           | 403073204 | ,000             | ,000 |
|                           | 403073303 | ,000             | ,000 |
|                           | 403073651 | ,000             | ,000 |
|                           | 403073771 | ,000             | ,000 |
|                           | 403133102 | ,000             | ,000 |
|                           | 403133106 | ,000             | ,000 |
|                           | 403133107 | ,000             | ,000 |
|                           | 403133109 | ,000             | ,000 |
|                           | 403133202 | ,000             | ,000 |
|                           | 403133203 | ,000             | ,000 |
|                           | 403133204 | ,000             | ,000 |
|                           | 403133315 | ,000             | ,000 |
|                           | 403133322 | ,000             | ,000 |
|                           | 403133401 | ,000             | ,000 |
|                           | 403133402 | ,000             | ,000 |
|                           | 403133550 | ,000             | ,000 |
|                           | 403133772 | ,000             | ,000 |
|                           | 403135803 | ,000             | ,000 |
|                           | 404060001 | ,000             | ,000 |
|                           | 404060002 | ,000             | ,000 |
|                           | 404310003 | ,000             | ,000 |
|                           | 404310004 | ,000             | ,000 |

**Categorical Variables Codings**

|                           |           | Parameter coding |      |
|---------------------------|-----------|------------------|------|
|                           |           | (30)             | (31) |
| VASTY2 (SAIR*10000)+VASTY | 403073101 | ,000             | ,000 |
|                           | 403073102 | ,000             | ,000 |
|                           | 403073103 | ,000             | ,000 |
|                           | 403073202 | ,000             | ,000 |
|                           | 403073203 | ,000             | ,000 |
|                           | 403073204 | ,000             | ,000 |
|                           | 403073303 | ,000             | ,000 |
|                           | 403073651 | ,000             | ,000 |
|                           | 403073771 | ,000             | ,000 |
|                           | 403133102 | ,000             | ,000 |
|                           | 403133106 | ,000             | ,000 |
|                           | 403133107 | ,000             | ,000 |
|                           | 403133109 | ,000             | ,000 |
|                           | 403133202 | ,000             | ,000 |
|                           | 403133203 | ,000             | ,000 |
|                           | 403133204 | ,000             | ,000 |
|                           | 403133315 | ,000             | ,000 |
|                           | 403133322 | ,000             | ,000 |
|                           | 403133401 | ,000             | ,000 |
|                           | 403133402 | ,000             | ,000 |
|                           | 403133550 | ,000             | ,000 |
|                           | 403133772 | ,000             | ,000 |
|                           | 403135803 | ,000             | ,000 |
|                           | 404060001 | ,000             | ,000 |
|                           | 404060002 | ,000             | ,000 |
|                           | 404310003 | ,000             | ,000 |
|                           | 404310004 | ,000             | ,000 |

BMJ

## Categorical Variables Codings

|                           |           | Parameter coding |      |
|---------------------------|-----------|------------------|------|
|                           |           | (32)             | (33) |
| VASTY2 (SAIR*10000)+VASTY | 403073101 | ,000             | ,000 |
|                           | 403073102 | ,000             | ,000 |
|                           | 403073103 | ,000             | ,000 |
|                           | 403073202 | ,000             | ,000 |
|                           | 403073203 | ,000             | ,000 |
|                           | 403073204 | ,000             | ,000 |
|                           | 403073303 | ,000             | ,000 |
|                           | 403073651 | ,000             | ,000 |
|                           | 403073771 | ,000             | ,000 |
|                           | 403133102 | ,000             | ,000 |
|                           | 403133106 | ,000             | ,000 |
|                           | 403133107 | ,000             | ,000 |
|                           | 403133109 | ,000             | ,000 |
|                           | 403133202 | ,000             | ,000 |
|                           | 403133203 | ,000             | ,000 |
|                           | 403133204 | ,000             | ,000 |
|                           | 403133315 | ,000             | ,000 |
|                           | 403133322 | ,000             | ,000 |
|                           | 403133401 | ,000             | ,000 |
|                           | 403133402 | ,000             | ,000 |
|                           | 403133550 | ,000             | ,000 |
|                           | 403133772 | ,000             | ,000 |
|                           | 403135803 | ,000             | ,000 |
|                           | 404060001 | ,000             | ,000 |
|                           | 404060002 | ,000             | ,000 |
|                           | 404310003 | ,000             | ,000 |
|                           | 404310004 | ,000             | ,000 |



## Categorical Variables Codings

|                           |           | Parameter coding |      |
|---------------------------|-----------|------------------|------|
|                           |           | (34)             | (35) |
| VASTY2 (SAIR*10000)+VASTY | 403073101 | ,000             | ,000 |
|                           | 403073102 | ,000             | ,000 |
|                           | 403073103 | ,000             | ,000 |
|                           | 403073202 | ,000             | ,000 |
|                           | 403073203 | ,000             | ,000 |
|                           | 403073204 | ,000             | ,000 |
|                           | 403073303 | ,000             | ,000 |
|                           | 403073651 | ,000             | ,000 |
|                           | 403073771 | ,000             | ,000 |
|                           | 403133102 | ,000             | ,000 |
|                           | 403133106 | ,000             | ,000 |
|                           | 403133107 | ,000             | ,000 |
|                           | 403133109 | ,000             | ,000 |
|                           | 403133202 | ,000             | ,000 |
|                           | 403133203 | ,000             | ,000 |
|                           | 403133204 | ,000             | ,000 |
|                           | 403133315 | ,000             | ,000 |
|                           | 403133322 | ,000             | ,000 |
|                           | 403133401 | ,000             | ,000 |
|                           | 403133402 | ,000             | ,000 |
|                           | 403133550 | ,000             | ,000 |
|                           | 403133772 | ,000             | ,000 |
|                           | 403135803 | ,000             | ,000 |
|                           | 404060001 | ,000             | ,000 |
|                           | 404060002 | ,000             | ,000 |
|                           | 404310003 | ,000             | ,000 |
|                           | 404310004 | ,000             | ,000 |

## Categorical Variables Codings

|                              |                                         | Frequency | Parameter<br>(1) |
|------------------------------|-----------------------------------------|-----------|------------------|
|                              | 502300005                               | 366       | ,000             |
|                              | 502300006                               | 225       | ,000             |
|                              | 502300007                               | 366       | ,000             |
|                              | 502300214                               | 366       | ,000             |
|                              | 502300411                               | 366       | ,000             |
|                              | 502300415                               | 360       | ,000             |
|                              | 502300416                               | 363       | ,000             |
|                              | 502300811                               | 364       | ,000             |
|                              | 502300913                               | 315       | ,000             |
| weekday veckodag             | 1 måndag                                | 1805      | ,000             |
|                              | 2 tisdag                                | 1812      | 1,000            |
|                              | 3 onsdag                                | 1800      | ,000             |
|                              | 4 torsdag                               | 1794      | ,000             |
|                              | 5 fredag                                | 1788      | ,000             |
|                              | 6 lördag                                | 1735      | ,000             |
|                              | 7 söndag                                | 1741      | ,000             |
| season säsong/period         | 1 januari-mars                          | 3182      | ,000             |
|                              | 2 april-maj                             | 2127      | 1,000            |
|                              | 3 juni-augusti                          | 2911      | ,000             |
|                              | 4 september-oktober                     | 2144      | ,000             |
|                              | 5 november-december                     | 2111      | ,000             |
| sv3 tredjedelar för standard | 1 andra tredjedelen                     | 3172      | ,000             |
|                              | 2 första tredjedelen                    | 4718      | 1,000            |
|                              | 3 tredje tredjedelen                    | 4585      | ,000             |
| holiday större helg          | 1 ingen större helg                     | 12078     | ,000             |
|                              | 2 större helg (påsk/midsommar/julonyår) | 397       | 1,000            |

## Categorical Variables Codings

|                              |                                         | Parameter coding |       |
|------------------------------|-----------------------------------------|------------------|-------|
|                              |                                         | (2)              | (3)   |
|                              | 502300005                               | ,000             | ,000  |
|                              | 502300006                               | ,000             | ,000  |
|                              | 502300007                               | ,000             | ,000  |
|                              | 502300214                               | ,000             | ,000  |
|                              | 502300411                               | ,000             | ,000  |
|                              | 502300415                               | ,000             | ,000  |
|                              | 502300416                               | ,000             | ,000  |
|                              | 502300811                               | ,000             | ,000  |
|                              | 502300913                               | ,000             | ,000  |
| weekday veckodag             | 1 måndag                                | ,000             | ,000  |
|                              | 2 tisdag                                | ,000             | ,000  |
|                              | 3 onsdag                                | 1,000            | ,000  |
|                              | 4 torsdag                               | ,000             | 1,000 |
|                              | 5 fredag                                | ,000             | ,000  |
|                              | 6 lördag                                | ,000             | ,000  |
|                              | 7 söndag                                | ,000             | ,000  |
| season säsong/period         | 1 januari-mars                          | ,000             | ,000  |
|                              | 2 april-maj                             | ,000             | ,000  |
|                              | 3 juni-augusti                          | 1,000            | ,000  |
|                              | 4 september-oktober                     | ,000             | 1,000 |
|                              | 5 november-december                     | ,000             | ,000  |
| sv3 tredjedelar för standard | 1 andra tredjedelen                     | ,000             |       |
|                              | 2 första tredjedelen                    | ,000             |       |
|                              | 3 tredje tredjedelen                    | 1,000            |       |
| holiday större helg          | 1 ingen större helg                     |                  |       |
|                              | 2 större helg (påsk/midsommar/julonyår) |                  |       |

## Categorical Variables Codings

|                              |                                         | Parameter coding |       |
|------------------------------|-----------------------------------------|------------------|-------|
|                              |                                         | (4)              | (5)   |
|                              | 502300005                               | ,000             | ,000  |
|                              | 502300006                               | ,000             | ,000  |
|                              | 502300007                               | ,000             | ,000  |
|                              | 502300214                               | ,000             | ,000  |
|                              | 502300411                               | ,000             | ,000  |
|                              | 502300415                               | ,000             | ,000  |
|                              | 502300416                               | ,000             | ,000  |
|                              | 502300811                               | ,000             | ,000  |
|                              | 502300913                               | ,000             | ,000  |
| weekday veckodag             | 1 måndag                                | ,000             | ,000  |
|                              | 2 tisdag                                | ,000             | ,000  |
|                              | 3 onsdag                                | ,000             | ,000  |
|                              | 4 torsdag                               | ,000             | ,000  |
|                              | 5 fredag                                | 1,000            | ,000  |
|                              | 6 lördag                                | ,000             | 1,000 |
|                              | 7 söndag                                | ,000             | ,000  |
| season säsong/period         | 1 januari-mars                          | ,000             |       |
|                              | 2 april-maj                             | ,000             |       |
|                              | 3 juni-augusti                          | ,000             |       |
|                              | 4 september-oktober                     | ,000             |       |
|                              | 5 november-december                     | 1,000            |       |
| sv3 tredjedelar för standard | 1 andra tredjedelen                     |                  |       |
|                              | 2 första tredjedelen                    |                  |       |
|                              | 3 tredje tredjedelen                    |                  |       |
| holiday större helg          | 1 ingen större helg                     |                  |       |
|                              | 2 större helg (påsk/midsommar/julonyår) |                  |       |

## Categorical Variables Codings

|                              |                                         | Parameter coding |      |
|------------------------------|-----------------------------------------|------------------|------|
|                              |                                         | (6)              | (7)  |
|                              | 502300005                               | ,000             | ,000 |
|                              | 502300006                               | ,000             | ,000 |
|                              | 502300007                               | ,000             | ,000 |
|                              | 502300214                               | ,000             | ,000 |
|                              | 502300411                               | ,000             | ,000 |
|                              | 502300415                               | ,000             | ,000 |
|                              | 502300416                               | ,000             | ,000 |
|                              | 502300811                               | ,000             | ,000 |
|                              | 502300913                               | ,000             | ,000 |
| weekday veckodag             | 1 måndag                                | ,000             |      |
|                              | 2 tisdag                                | ,000             |      |
|                              | 3 onsdag                                | ,000             |      |
|                              | 4 torsdag                               | ,000             |      |
|                              | 5 fredag                                | ,000             |      |
|                              | 6 lördag                                | ,000             |      |
|                              | 7 söndag                                | 1,000            |      |
| season säsong/period         | 1 januari-mars                          |                  |      |
|                              | 2 april-maj                             |                  |      |
|                              | 3 juni-augusti                          |                  |      |
|                              | 4 september-oktober                     |                  |      |
|                              | 5 november-december                     |                  |      |
| sv3 tredjedelar för standard | 1 andra tredjedelen                     |                  |      |
|                              | 2 första tredjedelen                    |                  |      |
|                              | 3 tredje tredjedelen                    |                  |      |
| holiday större helg          | 1 ingen större helg                     |                  |      |
|                              | 2 större helg (påsk/midsommar/julonyår) |                  |      |

## Categorical Variables Codings

|                              |                                         | Parameter coding |      |
|------------------------------|-----------------------------------------|------------------|------|
|                              |                                         | (8)              | (9)  |
|                              | 502300005                               | ,000             | ,000 |
|                              | 502300006                               | ,000             | ,000 |
|                              | 502300007                               | ,000             | ,000 |
|                              | 502300214                               | ,000             | ,000 |
|                              | 502300411                               | ,000             | ,000 |
|                              | 502300415                               | ,000             | ,000 |
|                              | 502300416                               | ,000             | ,000 |
|                              | 502300811                               | ,000             | ,000 |
|                              | 502300913                               | ,000             | ,000 |
| weekday veckodag             | 1 måndag                                |                  |      |
|                              | 2 tisdag                                |                  |      |
|                              | 3 onsdag                                |                  |      |
|                              | 4 torsdag                               |                  |      |
|                              | 5 fredag                                |                  |      |
|                              | 6 lördag                                |                  |      |
|                              | 7 söndag                                |                  |      |
| season säsong/period         | 1 januari-mars                          |                  |      |
|                              | 2 april-maj                             |                  |      |
|                              | 3 juni-augusti                          |                  |      |
|                              | 4 september-oktober                     |                  |      |
|                              | 5 november-december                     |                  |      |
| sv3 tredjedelar för standard | 1 andra tredjedelen                     |                  |      |
|                              | 2 första tredjedelen                    |                  |      |
|                              | 3 tredje tredjedelen                    |                  |      |
| holiday större helg          | 1 ingen större helg                     |                  |      |
|                              | 2 större helg (påsk/midsommar/julonyår) |                  |      |

## Categorical Variables Codings

|                              |                                         | Parameter coding |      |
|------------------------------|-----------------------------------------|------------------|------|
|                              |                                         | (10)             | (11) |
|                              | 502300005                               | ,000             | ,000 |
|                              | 502300006                               | ,000             | ,000 |
|                              | 502300007                               | ,000             | ,000 |
|                              | 502300214                               | ,000             | ,000 |
|                              | 502300411                               | ,000             | ,000 |
|                              | 502300415                               | ,000             | ,000 |
|                              | 502300416                               | ,000             | ,000 |
|                              | 502300811                               | ,000             | ,000 |
|                              | 502300913                               | ,000             | ,000 |
| weekday veckodag             | 1 måndag                                |                  |      |
|                              | 2 tisdag                                |                  |      |
|                              | 3 onsdag                                |                  |      |
|                              | 4 torsdag                               |                  |      |
|                              | 5 fredag                                |                  |      |
|                              | 6 lördag                                |                  |      |
|                              | 7 söndag                                |                  |      |
| season säsong/period         | 1 januari-mars                          |                  |      |
|                              | 2 april-maj                             |                  |      |
|                              | 3 juni-augusti                          |                  |      |
|                              | 4 september-oktober                     |                  |      |
|                              | 5 november-december                     |                  |      |
| sv3 tredjedelar för standard | 1 andra tredjedelen                     |                  |      |
|                              | 2 första tredjedelen                    |                  |      |
|                              | 3 tredje tredjedelen                    |                  |      |
| holiday större helg          | 1 ingen större helg                     |                  |      |
|                              | 2 större helg (påsk/midsommar/julonyår) |                  |      |

## Categorical Variables Codings

|                              |                                         | Parameter coding |      |
|------------------------------|-----------------------------------------|------------------|------|
|                              |                                         | (12)             | (13) |
|                              | 502300005                               | ,000             | ,000 |
|                              | 502300006                               | ,000             | ,000 |
|                              | 502300007                               | ,000             | ,000 |
|                              | 502300214                               | ,000             | ,000 |
|                              | 502300411                               | ,000             | ,000 |
|                              | 502300415                               | ,000             | ,000 |
|                              | 502300416                               | ,000             | ,000 |
|                              | 502300811                               | ,000             | ,000 |
|                              | 502300913                               | ,000             | ,000 |
| weekday veckodag             | 1 måndag                                |                  |      |
|                              | 2 tisdag                                |                  |      |
|                              | 3 onsdag                                |                  |      |
|                              | 4 torsdag                               |                  |      |
|                              | 5 fredag                                |                  |      |
|                              | 6 lördag                                |                  |      |
|                              | 7 söndag                                |                  |      |
| season säsong/period         | 1 januari-mars                          |                  |      |
|                              | 2 april-maj                             |                  |      |
|                              | 3 juni-augusti                          |                  |      |
|                              | 4 september-oktober                     |                  |      |
|                              | 5 november-december                     |                  |      |
| sv3 tredjedelar för standard | 1 andra tredjedelen                     |                  |      |
|                              | 2 första tredjedelen                    |                  |      |
|                              | 3 tredje tredjedelen                    |                  |      |
| holiday större helg          | 1 ingen större helg                     |                  |      |
|                              | 2 större helg (påsk/midsommar/julonyår) |                  |      |



## Categorical Variables Codings

|                              |                                         | Parameter coding |      |
|------------------------------|-----------------------------------------|------------------|------|
|                              |                                         | (14)             | (15) |
|                              | 502300005                               | ,000             | ,000 |
|                              | 502300006                               | ,000             | ,000 |
|                              | 502300007                               | ,000             | ,000 |
|                              | 502300214                               | ,000             | ,000 |
|                              | 502300411                               | ,000             | ,000 |
|                              | 502300415                               | ,000             | ,000 |
|                              | 502300416                               | ,000             | ,000 |
|                              | 502300811                               | ,000             | ,000 |
|                              | 502300913                               | ,000             | ,000 |
| weekday veckodag             | 1 måndag                                |                  |      |
|                              | 2 tisdag                                |                  |      |
|                              | 3 onsdag                                |                  |      |
|                              | 4 torsdag                               |                  |      |
|                              | 5 fredag                                |                  |      |
|                              | 6 lördag                                |                  |      |
|                              | 7 söndag                                |                  |      |
| season säsong/period         | 1 januari-mars                          |                  |      |
|                              | 2 april-maj                             |                  |      |
|                              | 3 juni-augusti                          |                  |      |
|                              | 4 september-oktober                     |                  |      |
|                              | 5 november-december                     |                  |      |
| sv3 tredjedelar för standard | 1 andra tredjedelen                     |                  |      |
|                              | 2 första tredjedelen                    |                  |      |
|                              | 3 tredje tredjedelen                    |                  |      |
| holiday större helg          | 1 ingen större helg                     |                  |      |
|                              | 2 större helg (påsk/midsommar/julonyår) |                  |      |

## Categorical Variables Codings

|                              |                                         | Parameter coding |      |
|------------------------------|-----------------------------------------|------------------|------|
|                              |                                         | (16)             | (17) |
|                              | 502300005                               | ,000             | ,000 |
|                              | 502300006                               | ,000             | ,000 |
|                              | 502300007                               | ,000             | ,000 |
|                              | 502300214                               | ,000             | ,000 |
|                              | 502300411                               | ,000             | ,000 |
|                              | 502300415                               | ,000             | ,000 |
|                              | 502300416                               | ,000             | ,000 |
|                              | 502300811                               | ,000             | ,000 |
|                              | 502300913                               | ,000             | ,000 |
| weekday veckodag             | 1 måndag                                |                  |      |
|                              | 2 tisdag                                |                  |      |
|                              | 3 onsdag                                |                  |      |
|                              | 4 torsdag                               |                  |      |
|                              | 5 fredag                                |                  |      |
|                              | 6 lördag                                |                  |      |
|                              | 7 söndag                                |                  |      |
| season säsong/period         | 1 januari-mars                          |                  |      |
|                              | 2 april-maj                             |                  |      |
|                              | 3 juni-augusti                          |                  |      |
|                              | 4 september-oktober                     |                  |      |
|                              | 5 november-december                     |                  |      |
| sv3 tredjedelar för standard | 1 andra tredjedelen                     |                  |      |
|                              | 2 första tredjedelen                    |                  |      |
|                              | 3 tredje tredjedelen                    |                  |      |
| holiday större helg          | 1 ingen större helg                     |                  |      |
|                              | 2 större helg (påsk/midsommar/julonyår) |                  |      |

## Categorical Variables Codings

|                              |                                         | Parameter coding |      |
|------------------------------|-----------------------------------------|------------------|------|
|                              |                                         | (18)             | (19) |
|                              | 502300005                               | ,000             | ,000 |
|                              | 502300006                               | ,000             | ,000 |
|                              | 502300007                               | ,000             | ,000 |
|                              | 502300214                               | ,000             | ,000 |
|                              | 502300411                               | ,000             | ,000 |
|                              | 502300415                               | ,000             | ,000 |
|                              | 502300416                               | ,000             | ,000 |
|                              | 502300811                               | ,000             | ,000 |
|                              | 502300913                               | ,000             | ,000 |
| weekday veckodag             | 1 måndag                                |                  |      |
|                              | 2 tisdag                                |                  |      |
|                              | 3 onsdag                                |                  |      |
|                              | 4 torsdag                               |                  |      |
|                              | 5 fredag                                |                  |      |
|                              | 6 lördag                                |                  |      |
|                              | 7 söndag                                |                  |      |
| season säsong/period         | 1 januari-mars                          |                  |      |
|                              | 2 april-maj                             |                  |      |
|                              | 3 juni-augusti                          |                  |      |
|                              | 4 september-oktober                     |                  |      |
|                              | 5 november-december                     |                  |      |
| sv3 tredjedelar för standard | 1 andra tredjedelen                     |                  |      |
|                              | 2 första tredjedelen                    |                  |      |
|                              | 3 tredje tredjedelen                    |                  |      |
| holiday större helg          | 1 ingen större helg                     |                  |      |
|                              | 2 större helg (påsk/midsommar/julonyår) |                  |      |

## Categorical Variables Codings

|                              |                                         | Parameter coding |      |
|------------------------------|-----------------------------------------|------------------|------|
|                              |                                         | (20)             | (21) |
|                              | 502300005                               | ,000             | ,000 |
|                              | 502300006                               | ,000             | ,000 |
|                              | 502300007                               | ,000             | ,000 |
|                              | 502300214                               | ,000             | ,000 |
|                              | 502300411                               | ,000             | ,000 |
|                              | 502300415                               | ,000             | ,000 |
|                              | 502300416                               | ,000             | ,000 |
|                              | 502300811                               | ,000             | ,000 |
|                              | 502300913                               | ,000             | ,000 |
| weekday veckodag             | 1 måndag                                |                  |      |
|                              | 2 tisdag                                |                  |      |
|                              | 3 onsdag                                |                  |      |
|                              | 4 torsdag                               |                  |      |
|                              | 5 fredag                                |                  |      |
|                              | 6 lördag                                |                  |      |
|                              | 7 söndag                                |                  |      |
| season säsong/period         | 1 januari-mars                          |                  |      |
|                              | 2 april-maj                             |                  |      |
|                              | 3 juni-augusti                          |                  |      |
|                              | 4 september-oktober                     |                  |      |
|                              | 5 november-december                     |                  |      |
| sv3 tredjedelar för standard | 1 andra tredjedelen                     |                  |      |
|                              | 2 första tredjedelen                    |                  |      |
|                              | 3 tredje tredjedelen                    |                  |      |
| holiday större helg          | 1 ingen större helg                     |                  |      |
|                              | 2 större helg (påsk/midsommar/julonyår) |                  |      |

## Categorical Variables Codings

|                              |                                         | Parameter coding |      |
|------------------------------|-----------------------------------------|------------------|------|
|                              |                                         | (22)             | (23) |
|                              | 502300005                               | ,000             | ,000 |
|                              | 502300006                               | ,000             | ,000 |
|                              | 502300007                               | ,000             | ,000 |
|                              | 502300214                               | ,000             | ,000 |
|                              | 502300411                               | ,000             | ,000 |
|                              | 502300415                               | ,000             | ,000 |
|                              | 502300416                               | ,000             | ,000 |
|                              | 502300811                               | ,000             | ,000 |
|                              | 502300913                               | ,000             | ,000 |
| weekday veckodag             | 1 måndag                                |                  |      |
|                              | 2 tisdag                                |                  |      |
|                              | 3 onsdag                                |                  |      |
|                              | 4 torsdag                               |                  |      |
|                              | 5 fredag                                |                  |      |
|                              | 6 lördag                                |                  |      |
|                              | 7 söndag                                |                  |      |
| season säsong/period         | 1 januari-mars                          |                  |      |
|                              | 2 april-maj                             |                  |      |
|                              | 3 juni-augusti                          |                  |      |
|                              | 4 september-oktober                     |                  |      |
|                              | 5 november-december                     |                  |      |
| sv3 tredjedelar för standard | 1 andra tredjedelen                     |                  |      |
|                              | 2 första tredjedelen                    |                  |      |
|                              | 3 tredje tredjedelen                    |                  |      |
| holiday större helg          | 1 ingen större helg                     |                  |      |
|                              | 2 större helg (påsk/midsommar/julonyår) |                  |      |

## Categorical Variables Codings

|                              |                                         | Parameter coding |      |
|------------------------------|-----------------------------------------|------------------|------|
|                              |                                         | (24)             | (25) |
|                              | 502300005                               | ,000             | ,000 |
|                              | 502300006                               | ,000             | ,000 |
|                              | 502300007                               | ,000             | ,000 |
|                              | 502300214                               | ,000             | ,000 |
|                              | 502300411                               | ,000             | ,000 |
|                              | 502300415                               | ,000             | ,000 |
|                              | 502300416                               | ,000             | ,000 |
|                              | 502300811                               | ,000             | ,000 |
|                              | 502300913                               | ,000             | ,000 |
| weekday veckodag             | 1 måndag                                |                  |      |
|                              | 2 tisdag                                |                  |      |
|                              | 3 onsdag                                |                  |      |
|                              | 4 torsdag                               |                  |      |
|                              | 5 fredag                                |                  |      |
|                              | 6 lördag                                |                  |      |
|                              | 7 söndag                                |                  |      |
| season säsong/period         | 1 januari-mars                          |                  |      |
|                              | 2 april-maj                             |                  |      |
|                              | 3 juni-augusti                          |                  |      |
|                              | 4 september-oktober                     |                  |      |
|                              | 5 november-december                     |                  |      |
| sv3 tredjedelar för standard | 1 andra tredjedelen                     |                  |      |
|                              | 2 första tredjedelen                    |                  |      |
|                              | 3 tredje tredjedelen                    |                  |      |
| holiday större helg          | 1 ingen större helg                     |                  |      |
|                              | 2 större helg (påsk/midsommar/julonyår) |                  |      |

## Categorical Variables Codings

|                              |                                         | Parameter coding |       |
|------------------------------|-----------------------------------------|------------------|-------|
|                              |                                         | (26)             | (27)  |
|                              | 502300005                               | ,000             | 1,000 |
|                              | 502300006                               | ,000             | ,000  |
|                              | 502300007                               | ,000             | ,000  |
|                              | 502300214                               | ,000             | ,000  |
|                              | 502300411                               | ,000             | ,000  |
|                              | 502300415                               | ,000             | ,000  |
|                              | 502300416                               | ,000             | ,000  |
|                              | 502300811                               | ,000             | ,000  |
|                              | 502300913                               | ,000             | ,000  |
| weekday veckodag             | 1 måndag                                |                  |       |
|                              | 2 tisdag                                |                  |       |
|                              | 3 onsdag                                |                  |       |
|                              | 4 torsdag                               |                  |       |
|                              | 5 fredag                                |                  |       |
|                              | 6 lördag                                |                  |       |
|                              | 7 söndag                                |                  |       |
| season säsong/period         | 1 januari-mars                          |                  |       |
|                              | 2 april-maj                             |                  |       |
|                              | 3 juni-augusti                          |                  |       |
|                              | 4 september-oktober                     |                  |       |
|                              | 5 november-december                     |                  |       |
| sv3 tredjedelar för standard | 1 andra tredjedelen                     |                  |       |
|                              | 2 första tredjedelen                    |                  |       |
|                              | 3 tredje tredjedelen                    |                  |       |
| holiday större helg          | 1 ingen större helg                     |                  |       |
|                              | 2 större helg (påsk/midsommar/julonyår) |                  |       |

## Categorical Variables Codings

|                              |                                         | Parameter coding |       |
|------------------------------|-----------------------------------------|------------------|-------|
|                              |                                         | (28)             | (29)  |
|                              | 502300005                               | ,000             | ,000  |
|                              | 502300006                               | 1,000            | ,000  |
|                              | 502300007                               | ,000             | 1,000 |
|                              | 502300214                               | ,000             | ,000  |
|                              | 502300411                               | ,000             | ,000  |
|                              | 502300415                               | ,000             | ,000  |
|                              | 502300416                               | ,000             | ,000  |
|                              | 502300811                               | ,000             | ,000  |
|                              | 502300913                               | ,000             | ,000  |
| weekday veckodag             | 1 måndag                                |                  |       |
|                              | 2 tisdag                                |                  |       |
|                              | 3 onsdag                                |                  |       |
|                              | 4 torsdag                               |                  |       |
|                              | 5 fredag                                |                  |       |
|                              | 6 lördag                                |                  |       |
|                              | 7 söndag                                |                  |       |
| season säsong/period         | 1 januari-mars                          |                  |       |
|                              | 2 april-maj                             |                  |       |
|                              | 3 juni-augusti                          |                  |       |
|                              | 4 september-oktober                     |                  |       |
|                              | 5 november-december                     |                  |       |
| sv3 tredjedelar för standard | 1 andra tredjedelen                     |                  |       |
|                              | 2 första tredjedelen                    |                  |       |
|                              | 3 tredje tredjedelen                    |                  |       |
| holiday större helg          | 1 ingen större helg                     |                  |       |
|                              | 2 större helg (påsk/midsommar/julonyår) |                  |       |



## Categorical Variables Codings

|                              |                                         | Parameter coding |       |
|------------------------------|-----------------------------------------|------------------|-------|
|                              |                                         | (30)             | (31)  |
|                              | 502300005                               | ,000             | ,000  |
|                              | 502300006                               | ,000             | ,000  |
|                              | 502300007                               | ,000             | ,000  |
|                              | 502300214                               | 1,000            | ,000  |
|                              | 502300411                               | ,000             | 1,000 |
|                              | 502300415                               | ,000             | ,000  |
|                              | 502300416                               | ,000             | ,000  |
|                              | 502300811                               | ,000             | ,000  |
|                              | 502300913                               | ,000             | ,000  |
| weekday veckodag             | 1 måndag                                |                  |       |
|                              | 2 tisdag                                |                  |       |
|                              | 3 onsdag                                |                  |       |
|                              | 4 torsdag                               |                  |       |
|                              | 5 fredag                                |                  |       |
|                              | 6 lördag                                |                  |       |
|                              | 7 söndag                                |                  |       |
| season säsong/period         | 1 januari-mars                          |                  |       |
|                              | 2 april-maj                             |                  |       |
|                              | 3 juni-augusti                          |                  |       |
|                              | 4 september-oktober                     |                  |       |
|                              | 5 november-december                     |                  |       |
| sv3 tredjedelar för standard | 1 andra tredjedelen                     |                  |       |
|                              | 2 första tredjedelen                    |                  |       |
|                              | 3 tredje tredjedelen                    |                  |       |
| holiday större helg          | 1 ingen större helg                     |                  |       |
|                              | 2 större helg (påsk/midsommar/julonyår) |                  |       |

## Categorical Variables Codings

|                              |                                         | Parameter coding |       |
|------------------------------|-----------------------------------------|------------------|-------|
|                              |                                         | (32)             | (33)  |
|                              | 502300005                               | ,000             | ,000  |
|                              | 502300006                               | ,000             | ,000  |
|                              | 502300007                               | ,000             | ,000  |
|                              | 502300214                               | ,000             | ,000  |
|                              | 502300411                               | ,000             | ,000  |
|                              | 502300415                               | 1,000            | ,000  |
|                              | 502300416                               | ,000             | 1,000 |
|                              | 502300811                               | ,000             | ,000  |
|                              | 502300913                               | ,000             | ,000  |
| weekday veckodag             | 1 måndag                                |                  |       |
|                              | 2 tisdag                                |                  |       |
|                              | 3 onsdag                                |                  |       |
|                              | 4 torsdag                               |                  |       |
|                              | 5 fredag                                |                  |       |
|                              | 6 lördag                                |                  |       |
|                              | 7 söndag                                |                  |       |
| season säsong/period         | 1 januari-mars                          |                  |       |
|                              | 2 april-maj                             |                  |       |
|                              | 3 juni-augusti                          |                  |       |
|                              | 4 september-oktober                     |                  |       |
|                              | 5 november-december                     |                  |       |
| sv3 tredjedelar för standard | 1 andra tredjedelen                     |                  |       |
|                              | 2 första tredjedelen                    |                  |       |
|                              | 3 tredje tredjedelen                    |                  |       |
| holiday större helg          | 1 ingen större helg                     |                  |       |
|                              | 2 större helg (påsk/midsommar/julonyår) |                  |       |

**Categorical Variables Codings**

|                              |                                         | Parameter coding |       |
|------------------------------|-----------------------------------------|------------------|-------|
|                              |                                         | (34)             | (35)  |
|                              | 502300005                               | ,000             | ,000  |
|                              | 502300006                               | ,000             | ,000  |
|                              | 502300007                               | ,000             | ,000  |
|                              | 502300214                               | ,000             | ,000  |
|                              | 502300411                               | ,000             | ,000  |
|                              | 502300415                               | ,000             | ,000  |
|                              | 502300416                               | ,000             | ,000  |
|                              | 502300811                               | 1,000            | ,000  |
|                              | 502300913                               | ,000             | 1,000 |
| weekday veckodag             | 1 måndag                                |                  |       |
|                              | 2 tisdag                                |                  |       |
|                              | 3 onsdag                                |                  |       |
|                              | 4 torsdag                               |                  |       |
|                              | 5 fredag                                |                  |       |
|                              | 6 lördag                                |                  |       |
|                              | 7 söndag                                |                  |       |
| season säsong/period         | 1 januari-mars                          |                  |       |
|                              | 2 april-maj                             |                  |       |
|                              | 3 juni-augusti                          |                  |       |
|                              | 4 september-oktober                     |                  |       |
|                              | 5 november-december                     |                  |       |
| sv3 tredjedelar för standard | 1 andra tredjedelen                     |                  |       |
|                              | 2 första tredjedelen                    |                  |       |
|                              | 3 tredje tredjedelen                    |                  |       |
| holiday större helg          | 1 ingen större helg                     |                  |       |
|                              | 2 större helg (påsk/midsommar/julonyår) |                  |       |

**Block 0: Beginning Block**

**Classification Table<sup>a,b</sup>**

| Observed           |                                                  |                                                              |
|--------------------|--------------------------------------------------|--------------------------------------------------------------|
| Step 0             | seuraus3 seuraus highest = haitta (i någon form) | 0 ingen händelse eller ei haittaa<br>1 haitta (i någon form) |
| Overall Percentage |                                                  |                                                              |

Classification Table<sup>a,b</sup>

| Observed           |                                                    | Predicted                         |                                   |
|--------------------|----------------------------------------------------|-----------------------------------|-----------------------------------|
|                    |                                                    | seurauslt3 seuraus highest        | 0 ingen händelse eller ei haittaa |
| Step 0             | seurauslt3 seuraus highest = haitta (i någon form) | 0 ingen händelse eller ei haittaa | 12075                             |
|                    |                                                    | 1 haitta (i någon form)           | 400                               |
| Overall Percentage |                                                    |                                   |                                   |

Classification Table<sup>a,b</sup>

| Observed           |                                                    | Predicted                         |                         |
|--------------------|----------------------------------------------------|-----------------------------------|-------------------------|
|                    |                                                    | seurauslt3 seuraus highest ..     | 1 haitta (i någon form) |
| Step 0             | seurauslt3 seuraus highest = haitta (i någon form) | 0 ingen händelse eller ei haittaa | 0                       |
|                    |                                                    | 1 haitta (i någon form)           | 0                       |
| Overall Percentage |                                                    |                                   |                         |

Classification Table<sup>a,b</sup>

| Observed           |                                                    | Predicted                         |       |
|--------------------|----------------------------------------------------|-----------------------------------|-------|
|                    |                                                    | Percentage Correct                |       |
| Step 0             | seurauslt3 seuraus highest = haitta (i någon form) | 0 ingen händelse eller ei haittaa | 100,0 |
|                    |                                                    | 1 haitta (i någon form)           | ,0    |
| Overall Percentage |                                                    |                                   | 96,8  |

a. Constant is included in the model.

b. The cut value is ,500

Variables in the Equation

|                 | B      | S.E. | Wald     | df | Sig. | Exp(B) |
|-----------------|--------|------|----------|----|------|--------|
| Step 0 Constant | -3,407 | ,051 | 4495,313 | 1  | ,000 | ,033   |

## Variables not in the Equation

|        |           |            | Score   | df | Sig. |
|--------|-----------|------------|---------|----|------|
| Step 0 | Variables | sv3        | 13,876  | 2  | ,001 |
|        |           | sv3(1)     | 10,745  | 1  | ,001 |
|        |           | sv3(2)     | 11,368  | 1  | ,001 |
|        |           | VASTY2     | 321,056 | 35 | ,000 |
|        |           | VASTY2(1)  | 1,769   | 1  | ,184 |
|        |           | VASTY2(2)  | 27,206  | 1  | ,000 |
|        |           | VASTY2(3)  | 8,562   | 1  | ,003 |
|        |           | VASTY2(4)  | ,988    | 1  | ,320 |
|        |           | VASTY2(5)  | ,587    | 1  | ,444 |
|        |           | VASTY2(6)  | 8,528   | 1  | ,003 |
|        |           | VASTY2(7)  | 2,666   | 1  | ,103 |
|        |           | VASTY2(8)  | ,008    | 1  | ,929 |
|        |           | VASTY2(9)  | 19,221  | 1  | ,000 |
|        |           | VASTY2(10) | 58,192  | 1  | ,000 |
|        |           | VASTY2(11) | 21,278  | 1  | ,000 |
|        |           | VASTY2(12) | 2,551   | 1  | ,110 |
|        |           | VASTY2(13) | 62,883  | 1  | ,000 |
|        |           | VASTY2(14) | ,045    | 1  | ,832 |
|        |           | VASTY2(15) | 8,562   | 1  | ,003 |
|        |           | VASTY2(16) | 1,322   | 1  | ,250 |
|        |           | VASTY2(17) | 2,012   | 1  | ,156 |
|        |           | VASTY2(18) | 6,791   | 1  | ,009 |
|        |           | VASTY2(19) | 10,418  | 1  | ,001 |
|        |           | VASTY2(20) | ,662    | 1  | ,416 |
|        |           | VASTY2(21) | 8,562   | 1  | ,003 |
|        |           | VASTY2(22) | 5,396   | 1  | ,020 |
|        |           | VASTY2(23) | ,045    | 1  | ,832 |
|        |           | VASTY2(24) | 5,427   | 1  | ,020 |
|        |           | VASTY2(25) | 6,092   | 1  | ,014 |
|        |           | VASTY2(26) | 7,868   | 1  | ,005 |
|        |           | VASTY2(27) | 5,427   | 1  | ,020 |
|        |           | VASTY2(28) | ,715    | 1  | ,398 |
|        |           | VASTY2(29) | 2,983   | 1  | ,084 |
|        |           | VASTY2(30) | 2,034   | 1  | ,154 |
|        |           | VASTY2(31) | 30,255  | 1  | ,000 |
|        |           | VASTY2(32) | 1,902   | 1  | ,168 |
|        |           | VASTY2(33) | 1,968   | 1  | ,161 |
|        |           | VASTY2(34) | 6,856   | 1  | ,009 |
|        |           | VASTY2(35) | ,127    | 1  | ,722 |
|        |           | weekday    | 12,260  | 6  | ,056 |
|        |           | weekday(1) | 2,946   | 1  | ,086 |
|        |           | weekday(2) | ,062    | 1  | ,804 |
|        |           | weekday(3) | ,254    | 1  | ,615 |

## Variables not in the Equation

|                    | Score   | df | Sig. |
|--------------------|---------|----|------|
| weekday(4)         | 2,864   | 1  | ,091 |
| weekday(5)         | ,463    | 1  | ,496 |
| weekday(6)         | 7,621   | 1  | ,006 |
| holiday(1)         | 1,875   | 1  | ,171 |
| season             | 11,711  | 4  | ,020 |
| season(1)          | ,494    | 1  | ,482 |
| season(2)          | ,040    | 1  | ,842 |
| season(3)          | 3,188   | 1  | ,074 |
| season(4)          | 8,641   | 1  | ,003 |
| Overall Statistics | 348,747 | 48 | ,000 |

## Block 1: Method = Enter

## Omnibus Tests of Model Coefficients

|             | Chi-square | df | Sig. |
|-------------|------------|----|------|
| Step 1 Step | 325,661    | 48 | ,000 |
| Block       | 325,661    | 48 | ,000 |
| Model       | 325,661    | 48 | ,000 |

## Model Summary

| Step | -2 Log likelihood     | Cox & Snell R Square | Nagelkerke R Square |
|------|-----------------------|----------------------|---------------------|
| 1    | 3213,388 <sup>a</sup> | ,026                 | ,104                |

a. Estimation terminated at iteration number 9 because parameter estimates changed by less than ,001.

Classification Table<sup>a</sup>

|                    |                                                   | Observed                                                     |
|--------------------|---------------------------------------------------|--------------------------------------------------------------|
| Step 1             | seuraust3 seuraus highest = haitta (i någon form) | 0 ingen händelse eller ei haittaa<br>1 haitta (i någon form) |
| Overall Percentage |                                                   |                                                              |

Classification Table<sup>a</sup>

| Observed           |                                                    | Predicted                         |                                   |
|--------------------|----------------------------------------------------|-----------------------------------|-----------------------------------|
|                    |                                                    | seurauslt3 seuraus highest        | 0 ingen händelse eller ei haittaa |
| Step 1             | seurauslt3 seuraus highest = haitta (i någon form) | 0 ingen händelse eller ei haittaa | 12075                             |
|                    |                                                    | 1 haitta (i någon form)           | 400                               |
| Overall Percentage |                                                    |                                   |                                   |

Classification Table<sup>a</sup>

| Observed           |                                                    | Predicted                         |                         |
|--------------------|----------------------------------------------------|-----------------------------------|-------------------------|
|                    |                                                    | seurauslt3 seuraus highest ..     | 1 haitta (i någon form) |
| Step 1             | seurauslt3 seuraus highest = haitta (i någon form) | 0 ingen händelse eller ei haittaa | 0                       |
|                    |                                                    | 1 haitta (i någon form)           | 0                       |
| Overall Percentage |                                                    |                                   |                         |

Classification Table<sup>a</sup>

| Observed           |                                                    | Predicted                         |       |
|--------------------|----------------------------------------------------|-----------------------------------|-------|
|                    |                                                    | Percentage Correct                |       |
| Step 1             | seurauslt3 seuraus highest = haitta (i någon form) | 0 ingen händelse eller ei haittaa | 100,0 |
|                    |                                                    | 1 haitta (i någon form)           | ,0    |
| Overall Percentage |                                                    |                                   | 96,8  |

a. The cut value is ,500

## Variables in the Equation

|                         | B      | S.E.  | Wald    | df | Sig. | Exp(B) |
|-------------------------|--------|-------|---------|----|------|--------|
| Step 1 <sup>a</sup> sv3 |        |       | ,702    | 2  | ,704 |        |
| sv3(1)                  | -,104  | ,157  | ,440    | 1  | ,507 | ,901   |
| sv3(2)                  | ,034   | ,149  | ,051    | 1  | ,822 | 1,034  |
| VASTY2                  |        |       | 221,463 | 35 | ,000 |        |
| VASTY2(1)               | ,595   | ,425  | 1,955   | 1  | ,162 | 1,813  |
| VASTY2(2)               | 1,192  | ,395  | 9,093   | 1  | ,003 | 3,295  |
| VASTY2(3)               | -1,512 | ,786  | 3,703   | 1  | ,054 | ,220   |
| VASTY2(4)               | ,544   | ,429  | 1,603   | 1  | ,205 | 1,722  |
| VASTY2(5)               | ,527   | ,444  | 1,412   | 1  | ,235 | 1,694  |
| VASTY2(6)               | -1,570 | ,791  | 3,941   | 1  | ,047 | ,208   |
| VASTY2(7)               | ,681   | ,420  | 2,627   | 1  | ,105 | 1,975  |
| VASTY2(8)               | ,323   | ,449  | ,518    | 1  | ,472 | 1,381  |
| VASTY2(9)               | 1,145  | ,397  | 8,312   | 1  | ,004 | 3,141  |
| VASTY2(10)              | 1,455  | ,389  | 14,017  | 1  | ,000 | 4,286  |
| VASTY2(11)              | 1,158  | ,393  | 8,680   | 1  | ,003 | 3,183  |
| VASTY2(12)              | ,619   | ,425  | 2,123   | 1  | ,145 | 1,858  |
| VASTY2(13)              | 1,481  | ,390  | 14,438  | 1  | ,000 | 4,397  |
| VASTY2(14)              | ,179   | ,459  | ,152    | 1  | ,697 | 1,196  |
| VASTY2(15)              | -1,567 | ,789  | 3,942   | 1  | ,047 | ,209   |
| VASTY2(16)              | -,491  | ,675  | ,528    | 1  | ,467 | ,612   |
| VASTY2(17)              | -,235  | ,511  | ,212    | 1  | ,645 | ,790   |
| VASTY2(18)              | -1,027 | ,679  | 2,286   | 1  | ,131 | ,358   |
| VASTY2(19)              | -2,138 | 1,062 | 4,053   | 1  | ,044 | ,118   |
| VASTY2(20)              | ,453   | ,452  | 1,006   | 1  | ,316 | 1,573  |
| VASTY2(21)              | -1,506 | ,786  | 3,671   | 1  | ,055 | ,222   |
| VASTY2(22)              | -,828  | ,606  | 1,867   | 1  | ,172 | ,437   |
| VASTY2(23)              | ,202   | ,456  | ,197    | 1  | ,658 | 1,224  |
| VASTY2(24)              | -,861  | ,607  | 2,013   | 1  | ,156 | ,423   |
| VASTY2(25)              | -1,310 | ,787  | 2,773   | 1  | ,096 | ,270   |
| VASTY2(26)              | -2,037 | 1,058 | 3,709   | 1  | ,054 | ,130   |
| VASTY2(27)              | -,874  | ,609  | 2,060   | 1  | ,151 | ,417   |
| VASTY2(28)              | -,157  | ,574  | ,075    | 1  | ,785 | ,855   |
| VASTY2(29)              | -,487  | ,543  | ,807    | 1  | ,369 | ,614   |
| VASTY2(30)              | -,242  | ,512  | ,223    | 1  | ,636 | ,785   |
| VASTY2(31)              | 1,323  | ,399  | 10,991  | 1  | ,001 | 3,753  |
| VASTY2(32)              | -,177  | ,521  | ,115    | 1  | ,734 | ,838   |
| VASTY2(33)              | -,187  | ,521  | ,129    | 1  | ,720 | ,830   |
| VASTY2(34)              | -1,127 | ,671  | 2,818   | 1  | ,093 | ,324   |
| VASTY2(35)              | ,119   | ,479  | ,061    | 1  | ,804 | 1,126  |
| weekday                 |        |       | 12,798  | 6  | ,046 |        |
| weekday(1)              | ,226   | ,185  | 1,493   | 1  | ,222 | 1,254  |
| weekday(2)              | -,012  | ,195  | ,004    | 1  | ,952 | ,988   |



## Variables in the Equation

|                     |            | 95% C.I. for EXP(B) |       |
|---------------------|------------|---------------------|-------|
|                     |            | Lower               | Upper |
| Step 1 <sup>a</sup> | sv3        |                     |       |
|                     | sv3(1)     | ,663                | 1,225 |
|                     | sv3(2)     | ,772                | 1,385 |
|                     | VASTY2     |                     |       |
|                     | VASTY2(1)  | ,787                | 4,172 |
|                     | VASTY2(2)  | 1,518               | 7,153 |
|                     | VASTY2(3)  | ,047                | 1,028 |
|                     | VASTY2(4)  | ,742                | 3,995 |
|                     | VASTY2(5)  | ,710                | 4,042 |
|                     | VASTY2(6)  | ,044                | ,980  |
|                     | VASTY2(7)  | ,867                | 4,497 |
|                     | VASTY2(8)  | ,573                | 3,330 |
|                     | VASTY2(9)  | 1,443               | 6,838 |
|                     | VASTY2(10) | 2,001               | 9,181 |
|                     | VASTY2(11) | 1,473               | 6,875 |
|                     | VASTY2(12) | ,808                | 4,273 |
|                     | VASTY2(13) | 2,048               | 9,440 |
|                     | VASTY2(14) | ,486                | 2,940 |
|                     | VASTY2(15) | ,044                | ,980  |
|                     | VASTY2(16) | ,163                | 2,300 |
|                     | VASTY2(17) | ,290                | 2,150 |
|                     | VASTY2(18) | ,095                | 1,356 |
|                     | VASTY2(19) | ,015                | ,945  |
|                     | VASTY2(20) | ,649                | 3,812 |
|                     | VASTY2(21) | ,048                | 1,035 |
|                     | VASTY2(22) | ,133                | 1,433 |
|                     | VASTY2(23) | ,500                | 2,995 |
|                     | VASTY2(24) | ,129                | 1,389 |
|                     | VASTY2(25) | ,058                | 1,261 |
|                     | VASTY2(26) | ,016                | 1,037 |
|                     | VASTY2(27) | ,126                | 1,377 |
|                     | VASTY2(28) | ,278                | 2,633 |
|                     | VASTY2(29) | ,212                | 1,779 |
|                     | VASTY2(30) | ,288                | 2,140 |
|                     | VASTY2(31) | 1,717               | 8,203 |
|                     | VASTY2(32) | ,302                | 2,326 |
|                     | VASTY2(33) | ,299                | 2,303 |
|                     | VASTY2(34) | ,087                | 1,208 |
|                     | VASTY2(35) | ,440                | 2,882 |
|                     | weekday    |                     |       |
|                     | weekday(1) | ,872                | 1,803 |
|                     | weekday(2) | ,675                | 1,448 |

Variables in the Equation

|            | B      | S.E. | Wald   | df | Sig. | Exp(B) |
|------------|--------|------|--------|----|------|--------|
| weekday(3) | ,085   | ,191 | ,196   | 1  | ,658 | 1,088  |
| weekday(4) | ,242   | ,186 | 1,693  | 1  | ,193 | 1,274  |
| weekday(5) | -,060  | ,200 | ,089   | 1  | ,766 | ,942   |
| weekday(6) | -,408  | ,217 | 3,525  | 1  | ,060 | ,665   |
| holiday(1) | -,473  | ,373 | 1,608  | 1  | ,205 | ,623   |
| season     |        |      | 10,546 | 4  | ,032 |        |
| season(1)  | -,213  | ,162 | 1,735  | 1  | ,188 | ,808   |
| season(2)  | -,108  | ,146 | ,546   | 1  | ,460 | ,898   |
| season(3)  | ,068   | ,150 | ,202   | 1  | ,653 | 1,070  |
| season(4)  | -,493  | ,181 | 7,436  | 1  | ,006 | ,611   |
| Constant   | -3,551 | ,377 | 88,742 | 1  | ,000 | ,029   |

Variables in the Equation

|            | 95% C.I. for EXP(B) |       |
|------------|---------------------|-------|
|            | Lower               | Upper |
| weekday(3) | ,748                | 1,583 |
| weekday(4) | ,885                | 1,836 |
| weekday(5) | ,637                | 1,394 |
| weekday(6) | ,434                | 1,018 |
| holiday(1) | ,300                | 1,294 |
| season     |                     |       |
| season(1)  | ,588                | 1,110 |
| season(2)  | ,675                | 1,195 |
| season(3)  | ,797                | 1,437 |
| season(4)  | ,429                | ,871  |
| Constant   |                     |       |

a. Variable(s) entered on step 1: sv3, VASTY2, weekday, holiday, season.

```
LOGISTIC REGRESSION VARIABLES seurauslt3
/METHOD=ENTER sv5 VASTY2 weekday holiday season
/CONTRAST (sv5)=Indicator(1)
/CONTRAST (VASTY2)=Indicator(1)
/CONTRAST (weekday)=Indicator(1)
/CONTRAST (holiday)=Indicator(1)
/CONTRAST (season)=Indicator(1)
/PRINT=CI(95)
/CRITERIA=PIN(0.05) POUT(0.10) ITERATE(20) CUT(0.5).
```

## Logistic Regression

[DataSet6] C:\cWordjan\Rafaela\_VCS\alla\_tillsammans\abo\_bjo\_vasa\_v1.sav

1  
2  
3  
4  
5  
6  
7  
8  
9  
10  
11  
12  
13  
14  
15  
16  
17

### Case Processing Summary

| Unweighted Cases <sup>a</sup> |                      | N     | Percent |
|-------------------------------|----------------------|-------|---------|
| Selected Cases                | Included in Analysis | 12475 | 100,0   |
|                               | Missing Cases        | 0     | ,0      |
|                               | Total                | 12475 | 100,0   |
| Unselected Cases              |                      | 0     | ,0      |
| Total                         |                      | 12475 | 100,0   |

18  
19  
20  
21  
22  
23

a. If weight is in effect, see classification table for the total number of cases.

### Dependent Variable Encoding

| Original Value                    | Internal Value |
|-----------------------------------|----------------|
| 0 ingen händelse eller ei haittaa | 0              |
| 1 haitta (i någon form)           | 1              |

### Categorical Variables Codings

|                           | Frequency | Parameter |
|---------------------------|-----------|-----------|
|                           |           | (1)       |
| VASTY2 (SAIR*10000)+VASTY | 365       | ,000      |
| 403073101                 | 362       | 1,000     |
| 403073102                 | 365       | ,000      |
| 403073103                 | 365       | ,000      |
| 403073202                 | 365       | ,000      |
| 403073203                 | 365       | ,000      |
| 403073204                 | 330       | ,000      |
| 403073303                 | 364       | ,000      |
| 403073651                 | 362       | ,000      |
| 403073771                 | 365       | ,000      |
| 403133102                 | 341       | ,000      |
| 403133106                 | 365       | ,000      |
| 403133107                 | 365       | ,000      |
| 403133109                 | 365       | ,000      |
| 403133202                 | 365       | ,000      |
| 403133203                 | 365       | ,000      |
| 403133204                 | 365       | ,000      |
| 403133315                 | 177       | ,000      |
| 403133322                 | 365       | ,000      |
| 403133401                 | 362       | ,000      |
| 403133402                 | 365       | ,000      |
| 403133550                 | 298       | ,000      |
| 403133772                 | 365       | ,000      |
| 403135803                 | 365       | ,000      |
| 404060001                 | 365       | ,000      |
| 404060002                 | 366       | ,000      |
| 404310003                 | 291       | ,000      |
| 404310004                 | 291       | ,000      |

54  
55  
56  
57  
58  
59  
60

Page 885

## Categorical Variables Codings

|                           |           | Parameter coding |       |
|---------------------------|-----------|------------------|-------|
|                           |           | (2)              | (3)   |
| VASTY2 (SAIR*10000)+VASTY | 403073101 | ,000             | ,000  |
|                           | 403073102 | ,000             | ,000  |
|                           | 403073103 | 1,000            | ,000  |
|                           | 403073202 | ,000             | 1,000 |
|                           | 403073203 | ,000             | ,000  |
|                           | 403073204 | ,000             | ,000  |
|                           | 403073303 | ,000             | ,000  |
|                           | 403073651 | ,000             | ,000  |
|                           | 403073771 | ,000             | ,000  |
|                           | 403133102 | ,000             | ,000  |
|                           | 403133106 | ,000             | ,000  |
|                           | 403133107 | ,000             | ,000  |
|                           | 403133109 | ,000             | ,000  |
|                           | 403133202 | ,000             | ,000  |
|                           | 403133203 | ,000             | ,000  |
|                           | 403133204 | ,000             | ,000  |
|                           | 403133315 | ,000             | ,000  |
|                           | 403133322 | ,000             | ,000  |
|                           | 403133401 | ,000             | ,000  |
|                           | 403133402 | ,000             | ,000  |
|                           | 403133550 | ,000             | ,000  |
|                           | 403133772 | ,000             | ,000  |
|                           | 403135803 | ,000             | ,000  |
|                           | 404060001 | ,000             | ,000  |
|                           | 404060002 | ,000             | ,000  |
|                           | 404310003 | ,000             | ,000  |
|                           | 404310004 | ,000             | ,000  |

## Categorical Variables Codings

|                           |           | Parameter coding |       |
|---------------------------|-----------|------------------|-------|
|                           |           | (4)              | (5)   |
| VASTY2 (SAIR*10000)+VASTY | 403073101 | ,000             | ,000  |
|                           | 403073102 | ,000             | ,000  |
|                           | 403073103 | ,000             | ,000  |
|                           | 403073202 | ,000             | ,000  |
|                           | 403073203 | 1,000            | ,000  |
|                           | 403073204 | ,000             | 1,000 |
|                           | 403073303 | ,000             | ,000  |
|                           | 403073651 | ,000             | ,000  |
|                           | 403073771 | ,000             | ,000  |
|                           | 403133102 | ,000             | ,000  |
|                           | 403133106 | ,000             | ,000  |
|                           | 403133107 | ,000             | ,000  |
|                           | 403133109 | ,000             | ,000  |
|                           | 403133202 | ,000             | ,000  |
|                           | 403133203 | ,000             | ,000  |
|                           | 403133204 | ,000             | ,000  |
|                           | 403133315 | ,000             | ,000  |
|                           | 403133322 | ,000             | ,000  |
|                           | 403133401 | ,000             | ,000  |
|                           | 403133402 | ,000             | ,000  |
|                           | 403133550 | ,000             | ,000  |
|                           | 403133772 | ,000             | ,000  |
|                           | 403135803 | ,000             | ,000  |
|                           | 404060001 | ,000             | ,000  |
|                           | 404060002 | ,000             | ,000  |
|                           | 404310003 | ,000             | ,000  |
|                           | 404310004 | ,000             | ,000  |

## Categorical Variables Codings

|                           |           | Parameter coding |       |
|---------------------------|-----------|------------------|-------|
|                           |           | (6)              | (7)   |
| VASTY2 (SAIR*10000)+VASTY | 403073101 | ,000             | ,000  |
|                           | 403073102 | ,000             | ,000  |
|                           | 403073103 | ,000             | ,000  |
|                           | 403073202 | ,000             | ,000  |
|                           | 403073203 | ,000             | ,000  |
|                           | 403073204 | ,000             | ,000  |
|                           | 403073303 | 1,000            | ,000  |
|                           | 403073651 | ,000             | 1,000 |
|                           | 403073771 | ,000             | ,000  |
|                           | 403133102 | ,000             | ,000  |
|                           | 403133106 | ,000             | ,000  |
|                           | 403133107 | ,000             | ,000  |
|                           | 403133109 | ,000             | ,000  |
|                           | 403133202 | ,000             | ,000  |
|                           | 403133203 | ,000             | ,000  |
|                           | 403133204 | ,000             | ,000  |
|                           | 403133315 | ,000             | ,000  |
|                           | 403133322 | ,000             | ,000  |
|                           | 403133401 | ,000             | ,000  |
|                           | 403133402 | ,000             | ,000  |
|                           | 403133550 | ,000             | ,000  |
|                           | 403133772 | ,000             | ,000  |
|                           | 403135803 | ,000             | ,000  |
|                           | 404060001 | ,000             | ,000  |
|                           | 404060002 | ,000             | ,000  |
|                           | 404310003 | ,000             | ,000  |
|                           | 404310004 | ,000             | ,000  |

**Categorical Variables Codings**

|                           |           | Parameter coding |       |
|---------------------------|-----------|------------------|-------|
|                           |           | (8)              | (9)   |
| VASTY2 (SAIR*10000)+VASTY | 403073101 | ,000             | ,000  |
|                           | 403073102 | ,000             | ,000  |
|                           | 403073103 | ,000             | ,000  |
|                           | 403073202 | ,000             | ,000  |
|                           | 403073203 | ,000             | ,000  |
|                           | 403073204 | ,000             | ,000  |
|                           | 403073303 | ,000             | ,000  |
|                           | 403073651 | ,000             | ,000  |
|                           | 403073771 | 1,000            | ,000  |
|                           | 403133102 | ,000             | 1,000 |
|                           | 403133106 | ,000             | ,000  |
|                           | 403133107 | ,000             | ,000  |
|                           | 403133109 | ,000             | ,000  |
|                           | 403133202 | ,000             | ,000  |
|                           | 403133203 | ,000             | ,000  |
|                           | 403133204 | ,000             | ,000  |
|                           | 403133315 | ,000             | ,000  |
|                           | 403133322 | ,000             | ,000  |
|                           | 403133401 | ,000             | ,000  |
|                           | 403133402 | ,000             | ,000  |
|                           | 403133550 | ,000             | ,000  |
|                           | 403133772 | ,000             | ,000  |
|                           | 403135803 | ,000             | ,000  |
|                           | 404060001 | ,000             | ,000  |
|                           | 404060002 | ,000             | ,000  |
|                           | 404310003 | ,000             | ,000  |
|                           | 404310004 | ,000             | ,000  |

BMJ

## Categorical Variables Codings

|                           |           | Parameter coding |       |
|---------------------------|-----------|------------------|-------|
|                           |           | (10)             | (11)  |
| VASTY2 (SAIR*10000)+VASTY | 403073101 | ,000             | ,000  |
|                           | 403073102 | ,000             | ,000  |
|                           | 403073103 | ,000             | ,000  |
|                           | 403073202 | ,000             | ,000  |
|                           | 403073203 | ,000             | ,000  |
|                           | 403073204 | ,000             | ,000  |
|                           | 403073303 | ,000             | ,000  |
|                           | 403073651 | ,000             | ,000  |
|                           | 403073771 | ,000             | ,000  |
|                           | 403133102 | ,000             | ,000  |
|                           | 403133106 | 1,000            | ,000  |
|                           | 403133107 | ,000             | 1,000 |
|                           | 403133109 | ,000             | ,000  |
|                           | 403133202 | ,000             | ,000  |
|                           | 403133203 | ,000             | ,000  |
|                           | 403133204 | ,000             | ,000  |
|                           | 403133315 | ,000             | ,000  |
|                           | 403133322 | ,000             | ,000  |
|                           | 403133401 | ,000             | ,000  |
|                           | 403133402 | ,000             | ,000  |
|                           | 403133550 | ,000             | ,000  |
|                           | 403133772 | ,000             | ,000  |
|                           | 403135803 | ,000             | ,000  |
|                           | 404060001 | ,000             | ,000  |
|                           | 404060002 | ,000             | ,000  |
|                           | 404310003 | ,000             | ,000  |
|                           | 404310004 | ,000             | ,000  |



## Categorical Variables Codings

|                           |           | Parameter coding |       |
|---------------------------|-----------|------------------|-------|
|                           |           | (12)             | (13)  |
| VASTY2 (SAIR*10000)+VASTY | 403073101 | ,000             | ,000  |
|                           | 403073102 | ,000             | ,000  |
|                           | 403073103 | ,000             | ,000  |
|                           | 403073202 | ,000             | ,000  |
|                           | 403073203 | ,000             | ,000  |
|                           | 403073204 | ,000             | ,000  |
|                           | 403073303 | ,000             | ,000  |
|                           | 403073651 | ,000             | ,000  |
|                           | 403073771 | ,000             | ,000  |
|                           | 403133102 | ,000             | ,000  |
|                           | 403133106 | ,000             | ,000  |
|                           | 403133107 | ,000             | ,000  |
|                           | 403133109 | 1,000            | ,000  |
|                           | 403133202 | ,000             | 1,000 |
|                           | 403133203 | ,000             | ,000  |
|                           | 403133204 | ,000             | ,000  |
|                           | 403133315 | ,000             | ,000  |
|                           | 403133322 | ,000             | ,000  |
|                           | 403133401 | ,000             | ,000  |
|                           | 403133402 | ,000             | ,000  |
|                           | 403133550 | ,000             | ,000  |
|                           | 403133772 | ,000             | ,000  |
|                           | 403135803 | ,000             | ,000  |
|                           | 404060001 | ,000             | ,000  |
|                           | 404060002 | ,000             | ,000  |
|                           | 404310003 | ,000             | ,000  |
|                           | 404310004 | ,000             | ,000  |

## Categorical Variables Codings

|                           |           | Parameter coding |       |
|---------------------------|-----------|------------------|-------|
|                           |           | (14)             | (15)  |
| VASTY2 (SAIR*10000)+VASTY | 403073101 | ,000             | ,000  |
|                           | 403073102 | ,000             | ,000  |
|                           | 403073103 | ,000             | ,000  |
|                           | 403073202 | ,000             | ,000  |
|                           | 403073203 | ,000             | ,000  |
|                           | 403073204 | ,000             | ,000  |
|                           | 403073303 | ,000             | ,000  |
|                           | 403073651 | ,000             | ,000  |
|                           | 403073771 | ,000             | ,000  |
|                           | 403133102 | ,000             | ,000  |
|                           | 403133106 | ,000             | ,000  |
|                           | 403133107 | ,000             | ,000  |
|                           | 403133109 | ,000             | ,000  |
|                           | 403133202 | ,000             | ,000  |
|                           | 403133203 | 1,000            | ,000  |
|                           | 403133204 | ,000             | 1,000 |
|                           | 403133315 | ,000             | ,000  |
|                           | 403133322 | ,000             | ,000  |
|                           | 403133401 | ,000             | ,000  |
|                           | 403133402 | ,000             | ,000  |
|                           | 403133550 | ,000             | ,000  |
|                           | 403133772 | ,000             | ,000  |
|                           | 403135803 | ,000             | ,000  |
|                           | 404060001 | ,000             | ,000  |
|                           | 404060002 | ,000             | ,000  |
|                           | 404310003 | ,000             | ,000  |
|                           | 404310004 | ,000             | ,000  |

## Categorical Variables Codings

|                           |           | Parameter coding |       |
|---------------------------|-----------|------------------|-------|
|                           |           | (16)             | (17)  |
| VASTY2 (SAIR*10000)+VASTY | 403073101 | ,000             | ,000  |
|                           | 403073102 | ,000             | ,000  |
|                           | 403073103 | ,000             | ,000  |
|                           | 403073202 | ,000             | ,000  |
|                           | 403073203 | ,000             | ,000  |
|                           | 403073204 | ,000             | ,000  |
|                           | 403073303 | ,000             | ,000  |
|                           | 403073651 | ,000             | ,000  |
|                           | 403073771 | ,000             | ,000  |
|                           | 403133102 | ,000             | ,000  |
|                           | 403133106 | ,000             | ,000  |
|                           | 403133107 | ,000             | ,000  |
|                           | 403133109 | ,000             | ,000  |
|                           | 403133202 | ,000             | ,000  |
|                           | 403133203 | ,000             | ,000  |
|                           | 403133204 | ,000             | ,000  |
|                           | 403133315 | 1,000            | ,000  |
|                           | 403133322 | ,000             | 1,000 |
|                           | 403133401 | ,000             | ,000  |
|                           | 403133402 | ,000             | ,000  |
|                           | 403133550 | ,000             | ,000  |
|                           | 403133772 | ,000             | ,000  |
|                           | 403135803 | ,000             | ,000  |
|                           | 404060001 | ,000             | ,000  |
|                           | 404060002 | ,000             | ,000  |
|                           | 404310003 | ,000             | ,000  |
|                           | 404310004 | ,000             | ,000  |

## Categorical Variables Codings

|                           |           | Parameter coding |       |
|---------------------------|-----------|------------------|-------|
|                           |           | (18)             | (19)  |
| VASTY2 (SAIR*10000)+VASTY | 403073101 | ,000             | ,000  |
|                           | 403073102 | ,000             | ,000  |
|                           | 403073103 | ,000             | ,000  |
|                           | 403073202 | ,000             | ,000  |
|                           | 403073203 | ,000             | ,000  |
|                           | 403073204 | ,000             | ,000  |
|                           | 403073303 | ,000             | ,000  |
|                           | 403073651 | ,000             | ,000  |
|                           | 403073771 | ,000             | ,000  |
|                           | 403133102 | ,000             | ,000  |
|                           | 403133106 | ,000             | ,000  |
|                           | 403133107 | ,000             | ,000  |
|                           | 403133109 | ,000             | ,000  |
|                           | 403133202 | ,000             | ,000  |
|                           | 403133203 | ,000             | ,000  |
|                           | 403133204 | ,000             | ,000  |
|                           | 403133315 | ,000             | ,000  |
|                           | 403133322 | ,000             | ,000  |
|                           | 403133401 | 1,000            | ,000  |
|                           | 403133402 | ,000             | 1,000 |
|                           | 403133550 | ,000             | ,000  |
|                           | 403133772 | ,000             | ,000  |
|                           | 403135803 | ,000             | ,000  |
|                           | 404060001 | ,000             | ,000  |
|                           | 404060002 | ,000             | ,000  |
|                           | 404310003 | ,000             | ,000  |
|                           | 404310004 | ,000             | ,000  |

## Categorical Variables Codings

|                           |           | Parameter coding |       |
|---------------------------|-----------|------------------|-------|
|                           |           | (20)             | (21)  |
| VASTY2 (SAIR*10000)+VASTY | 403073101 | ,000             | ,000  |
|                           | 403073102 | ,000             | ,000  |
|                           | 403073103 | ,000             | ,000  |
|                           | 403073202 | ,000             | ,000  |
|                           | 403073203 | ,000             | ,000  |
|                           | 403073204 | ,000             | ,000  |
|                           | 403073303 | ,000             | ,000  |
|                           | 403073651 | ,000             | ,000  |
|                           | 403073771 | ,000             | ,000  |
|                           | 403133102 | ,000             | ,000  |
|                           | 403133106 | ,000             | ,000  |
|                           | 403133107 | ,000             | ,000  |
|                           | 403133109 | ,000             | ,000  |
|                           | 403133202 | ,000             | ,000  |
|                           | 403133203 | ,000             | ,000  |
|                           | 403133204 | ,000             | ,000  |
|                           | 403133315 | ,000             | ,000  |
|                           | 403133322 | ,000             | ,000  |
|                           | 403133401 | ,000             | ,000  |
|                           | 403133402 | ,000             | ,000  |
|                           | 403133550 | 1,000            | ,000  |
|                           | 403133772 | ,000             | 1,000 |
|                           | 403135803 | ,000             | ,000  |
|                           | 404060001 | ,000             | ,000  |
|                           | 404060002 | ,000             | ,000  |
|                           | 404310003 | ,000             | ,000  |
|                           | 404310004 | ,000             | ,000  |

## Categorical Variables Codings

|                           |           | Parameter coding |       |
|---------------------------|-----------|------------------|-------|
|                           |           | (22)             | (23)  |
| VASTY2 (SAIR*10000)+VASTY | 403073101 | ,000             | ,000  |
|                           | 403073102 | ,000             | ,000  |
|                           | 403073103 | ,000             | ,000  |
|                           | 403073202 | ,000             | ,000  |
|                           | 403073203 | ,000             | ,000  |
|                           | 403073204 | ,000             | ,000  |
|                           | 403073303 | ,000             | ,000  |
|                           | 403073651 | ,000             | ,000  |
|                           | 403073771 | ,000             | ,000  |
|                           | 403133102 | ,000             | ,000  |
|                           | 403133106 | ,000             | ,000  |
|                           | 403133107 | ,000             | ,000  |
|                           | 403133109 | ,000             | ,000  |
|                           | 403133202 | ,000             | ,000  |
|                           | 403133203 | ,000             | ,000  |
|                           | 403133204 | ,000             | ,000  |
|                           | 403133315 | ,000             | ,000  |
|                           | 403133322 | ,000             | ,000  |
|                           | 403133401 | ,000             | ,000  |
|                           | 403133402 | ,000             | ,000  |
|                           | 403133550 | ,000             | ,000  |
|                           | 403133772 | ,000             | ,000  |
|                           | 403135803 | 1,000            | ,000  |
|                           | 404060001 | ,000             | 1,000 |
|                           | 404060002 | ,000             | ,000  |
|                           | 404310003 | ,000             | ,000  |
|                           | 404310004 | ,000             | ,000  |

1  
2  
3  
4  
5  
6  
7  
8  
9  
10  
11  
12  
13  
14  
15  
16  
17  
18  
19  
20  
21  
22  
23  
24  
25  
26  
27  
28  
29  
30  
31  
32  
33  
34  
35  
36  
37  
38  
39  
40  
41  
42  
43  
44  
45  
46  
47  
48  
49  
50  
51  
52  
53  
54  
55  
56  
57  
58  
59  
60

**Categorical Variables Codings**

|                           |           | Parameter coding |       |
|---------------------------|-----------|------------------|-------|
|                           |           | (24)             | (25)  |
| VASTY2 (SAIR*10000)+VASTY | 403073101 | ,000             | ,000  |
|                           | 403073102 | ,000             | ,000  |
|                           | 403073103 | ,000             | ,000  |
|                           | 403073202 | ,000             | ,000  |
|                           | 403073203 | ,000             | ,000  |
|                           | 403073204 | ,000             | ,000  |
|                           | 403073303 | ,000             | ,000  |
|                           | 403073651 | ,000             | ,000  |
|                           | 403073771 | ,000             | ,000  |
|                           | 403133102 | ,000             | ,000  |
|                           | 403133106 | ,000             | ,000  |
|                           | 403133107 | ,000             | ,000  |
|                           | 403133109 | ,000             | ,000  |
|                           | 403133202 | ,000             | ,000  |
|                           | 403133203 | ,000             | ,000  |
|                           | 403133204 | ,000             | ,000  |
|                           | 403133315 | ,000             | ,000  |
|                           | 403133322 | ,000             | ,000  |
|                           | 403133401 | ,000             | ,000  |
|                           | 403133402 | ,000             | ,000  |
|                           | 403133550 | ,000             | ,000  |
|                           | 403133772 | ,000             | ,000  |
|                           | 403135803 | ,000             | ,000  |
|                           | 404060001 | ,000             | ,000  |
|                           | 404060002 | 1,000            | ,000  |
|                           | 404310003 | ,000             | 1,000 |
|                           | 404310004 | ,000             | ,000  |

## Categorical Variables Codings

|                           |           | Parameter coding |      |
|---------------------------|-----------|------------------|------|
|                           |           | (26)             | (27) |
| VASTY2 (SAIR*10000)+VASTY | 403073101 | ,000             | ,000 |
|                           | 403073102 | ,000             | ,000 |
|                           | 403073103 | ,000             | ,000 |
|                           | 403073202 | ,000             | ,000 |
|                           | 403073203 | ,000             | ,000 |
|                           | 403073204 | ,000             | ,000 |
|                           | 403073303 | ,000             | ,000 |
|                           | 403073651 | ,000             | ,000 |
|                           | 403073771 | ,000             | ,000 |
|                           | 403133102 | ,000             | ,000 |
|                           | 403133106 | ,000             | ,000 |
|                           | 403133107 | ,000             | ,000 |
|                           | 403133109 | ,000             | ,000 |
|                           | 403133202 | ,000             | ,000 |
|                           | 403133203 | ,000             | ,000 |
|                           | 403133204 | ,000             | ,000 |
|                           | 403133315 | ,000             | ,000 |
|                           | 403133322 | ,000             | ,000 |
|                           | 403133401 | ,000             | ,000 |
|                           | 403133402 | ,000             | ,000 |
|                           | 403133550 | ,000             | ,000 |
|                           | 403133772 | ,000             | ,000 |
|                           | 403135803 | ,000             | ,000 |
|                           | 404060001 | ,000             | ,000 |
|                           | 404060002 | ,000             | ,000 |
|                           | 404310003 | ,000             | ,000 |
|                           | 404310004 | 1,000            | ,000 |



1  
2  
3  
4  
5  
6  
7  
8  
9  
10  
11  
12  
13  
14  
15  
16  
17  
18  
19  
20  
21  
22  
23  
24  
25  
26  
27  
28  
29  
30  
31  
32  
33  
34  
35  
36  
37  
38  
39  
40  
41  
42  
43  
44  
45  
46  
47  
48  
49  
50  
51  
52  
53  
54  
55  
56  
57  
58  
59  
60

**Categorical Variables Codings**

|                           |           | Parameter coding |      |
|---------------------------|-----------|------------------|------|
|                           |           | (28)             | (29) |
| VASTY2 (SAIR*10000)+VASTY | 403073101 | ,000             | ,000 |
|                           | 403073102 | ,000             | ,000 |
|                           | 403073103 | ,000             | ,000 |
|                           | 403073202 | ,000             | ,000 |
|                           | 403073203 | ,000             | ,000 |
|                           | 403073204 | ,000             | ,000 |
|                           | 403073303 | ,000             | ,000 |
|                           | 403073651 | ,000             | ,000 |
|                           | 403073771 | ,000             | ,000 |
|                           | 403133102 | ,000             | ,000 |
|                           | 403133106 | ,000             | ,000 |
|                           | 403133107 | ,000             | ,000 |
|                           | 403133109 | ,000             | ,000 |
|                           | 403133202 | ,000             | ,000 |
|                           | 403133203 | ,000             | ,000 |
|                           | 403133204 | ,000             | ,000 |
|                           | 403133315 | ,000             | ,000 |
|                           | 403133322 | ,000             | ,000 |
|                           | 403133401 | ,000             | ,000 |
|                           | 403133402 | ,000             | ,000 |
|                           | 403133550 | ,000             | ,000 |
|                           | 403133772 | ,000             | ,000 |
|                           | 403135803 | ,000             | ,000 |
|                           | 404060001 | ,000             | ,000 |
|                           | 404060002 | ,000             | ,000 |
|                           | 404310003 | ,000             | ,000 |
|                           | 404310004 | ,000             | ,000 |

## Categorical Variables Codings

|                           |           | Parameter coding |      |
|---------------------------|-----------|------------------|------|
|                           |           | (30)             | (31) |
| VASTY2 (SAIR*10000)+VASTY | 403073101 | ,000             | ,000 |
|                           | 403073102 | ,000             | ,000 |
|                           | 403073103 | ,000             | ,000 |
|                           | 403073202 | ,000             | ,000 |
|                           | 403073203 | ,000             | ,000 |
|                           | 403073204 | ,000             | ,000 |
|                           | 403073303 | ,000             | ,000 |
|                           | 403073651 | ,000             | ,000 |
|                           | 403073771 | ,000             | ,000 |
|                           | 403133102 | ,000             | ,000 |
|                           | 403133106 | ,000             | ,000 |
|                           | 403133107 | ,000             | ,000 |
|                           | 403133109 | ,000             | ,000 |
|                           | 403133202 | ,000             | ,000 |
|                           | 403133203 | ,000             | ,000 |
|                           | 403133204 | ,000             | ,000 |
|                           | 403133315 | ,000             | ,000 |
|                           | 403133322 | ,000             | ,000 |
|                           | 403133401 | ,000             | ,000 |
|                           | 403133402 | ,000             | ,000 |
|                           | 403133550 | ,000             | ,000 |
|                           | 403133772 | ,000             | ,000 |
|                           | 403135803 | ,000             | ,000 |
|                           | 404060001 | ,000             | ,000 |
|                           | 404060002 | ,000             | ,000 |
|                           | 404310003 | ,000             | ,000 |
|                           | 404310004 | ,000             | ,000 |

## Categorical Variables Codings

|                           |           | Parameter coding |      |
|---------------------------|-----------|------------------|------|
|                           |           | (32)             | (33) |
| VASTY2 (SAIR*10000)+VASTY | 403073101 | ,000             | ,000 |
|                           | 403073102 | ,000             | ,000 |
|                           | 403073103 | ,000             | ,000 |
|                           | 403073202 | ,000             | ,000 |
|                           | 403073203 | ,000             | ,000 |
|                           | 403073204 | ,000             | ,000 |
|                           | 403073303 | ,000             | ,000 |
|                           | 403073651 | ,000             | ,000 |
|                           | 403073771 | ,000             | ,000 |
|                           | 403133102 | ,000             | ,000 |
|                           | 403133106 | ,000             | ,000 |
|                           | 403133107 | ,000             | ,000 |
|                           | 403133109 | ,000             | ,000 |
|                           | 403133202 | ,000             | ,000 |
|                           | 403133203 | ,000             | ,000 |
|                           | 403133204 | ,000             | ,000 |
|                           | 403133315 | ,000             | ,000 |
|                           | 403133322 | ,000             | ,000 |
|                           | 403133401 | ,000             | ,000 |
|                           | 403133402 | ,000             | ,000 |
|                           | 403133550 | ,000             | ,000 |
|                           | 403133772 | ,000             | ,000 |
|                           | 403135803 | ,000             | ,000 |
|                           | 404060001 | ,000             | ,000 |
|                           | 404060002 | ,000             | ,000 |
|                           | 404310003 | ,000             | ,000 |
|                           | 404310004 | ,000             | ,000 |

## Categorical Variables Codings

|                           |           | Parameter coding |      |
|---------------------------|-----------|------------------|------|
|                           |           | (34)             | (35) |
| VASTY2 (SAIR*10000)+VASTY | 403073101 | ,000             | ,000 |
|                           | 403073102 | ,000             | ,000 |
|                           | 403073103 | ,000             | ,000 |
|                           | 403073202 | ,000             | ,000 |
|                           | 403073203 | ,000             | ,000 |
|                           | 403073204 | ,000             | ,000 |
|                           | 403073303 | ,000             | ,000 |
|                           | 403073651 | ,000             | ,000 |
|                           | 403073771 | ,000             | ,000 |
|                           | 403133102 | ,000             | ,000 |
|                           | 403133106 | ,000             | ,000 |
|                           | 403133107 | ,000             | ,000 |
|                           | 403133109 | ,000             | ,000 |
|                           | 403133202 | ,000             | ,000 |
|                           | 403133203 | ,000             | ,000 |
|                           | 403133204 | ,000             | ,000 |
|                           | 403133315 | ,000             | ,000 |
|                           | 403133322 | ,000             | ,000 |
|                           | 403133401 | ,000             | ,000 |
|                           | 403133402 | ,000             | ,000 |
|                           | 403133550 | ,000             | ,000 |
|                           | 403133772 | ,000             | ,000 |
|                           | 403135803 | ,000             | ,000 |
|                           | 404060001 | ,000             | ,000 |
|                           | 404060002 | ,000             | ,000 |
|                           | 404310003 | ,000             | ,000 |
|                           | 404310004 | ,000             | ,000 |

## Categorical Variables Codings

|                            |                                         | Frequency | Parameter<br>(1) |
|----------------------------|-----------------------------------------|-----------|------------------|
|                            | 502300005                               | 366       | ,000             |
|                            | 502300006                               | 225       | ,000             |
|                            | 502300007                               | 366       | ,000             |
|                            | 502300214                               | 366       | ,000             |
|                            | 502300411                               | 366       | ,000             |
|                            | 502300415                               | 360       | ,000             |
|                            | 502300416                               | 363       | ,000             |
|                            | 502300811                               | 364       | ,000             |
|                            | 502300913                               | 315       | ,000             |
| weekday veckodag           | 1 måndag                                | 1805      | ,000             |
|                            | 2 tisdag                                | 1812      | 1,000            |
|                            | 3 onsdag                                | 1800      | ,000             |
|                            | 4 torsdag                               | 1794      | ,000             |
|                            | 5 fredag                                | 1788      | ,000             |
|                            | 6 lördag                                | 1735      | ,000             |
|                            | 7 söndag                                | 1741      | ,000             |
| season säsong/period       | 1 januari-mars                          | 3182      | ,000             |
|                            | 2 april-maj                             | 2127      | 1,000            |
|                            | 3 juni-augusti                          | 2911      | ,000             |
|                            | 4 september-oktober                     | 2144      | ,000             |
|                            | 5 november-december                     | 2111      | ,000             |
| sv5 kvintiler för standard | 1 tredje kvintilen                      | 1863      | ,000             |
|                            | 2 första kvintilen                      | 3570      | 1,000            |
|                            | 3 andra kvintilen                       | 1759      | ,000             |
|                            | 4 fjärde kvintilen                      | 2327      | ,000             |
|                            | 5 femte kvintilen                       | 2956      | ,000             |
| holiday större helg        | 1 ingen större helg                     | 12078     | ,000             |
|                            | 2 större helg (påsk/midsommar/julonyår) | 397       | 1,000            |

## Categorical Variables Codings

|                            |                                         | Parameter coding |       |
|----------------------------|-----------------------------------------|------------------|-------|
|                            |                                         | (2)              | (3)   |
|                            | 502300005                               | ,000             | ,000  |
|                            | 502300006                               | ,000             | ,000  |
|                            | 502300007                               | ,000             | ,000  |
|                            | 502300214                               | ,000             | ,000  |
|                            | 502300411                               | ,000             | ,000  |
|                            | 502300415                               | ,000             | ,000  |
|                            | 502300416                               | ,000             | ,000  |
|                            | 502300811                               | ,000             | ,000  |
|                            | 502300913                               | ,000             | ,000  |
| weekday veckodag           | 1 måndag                                | ,000             | ,000  |
|                            | 2 tisdag                                | ,000             | ,000  |
|                            | 3 onsdag                                | 1,000            | ,000  |
|                            | 4 torsdag                               | ,000             | 1,000 |
|                            | 5 fredag                                | ,000             | ,000  |
|                            | 6 lördag                                | ,000             | ,000  |
|                            | 7 söndag                                | ,000             | ,000  |
| season säsong/period       | 1 januari-mars                          | ,000             | ,000  |
|                            | 2 april-maj                             | ,000             | ,000  |
|                            | 3 juni-augusti                          | 1,000            | ,000  |
|                            | 4 september-oktober                     | ,000             | 1,000 |
|                            | 5 november-december                     | ,000             | ,000  |
| sv5 kvintiler för standard | 1 tredje kvintilen                      | ,000             | ,000  |
|                            | 2 första kvintilen                      | ,000             | ,000  |
|                            | 3 andra kvintilen                       | 1,000            | ,000  |
|                            | 4 fjärde kvintilen                      | ,000             | 1,000 |
|                            | 5 femte kvintilen                       | ,000             | ,000  |
| holiday större helg        | 1 ingen större helg                     |                  |       |
|                            | 2 större helg (påsk/midsommar/julonyår) |                  |       |

## Categorical Variables Codings

|                            |                                         | Parameter coding |       |
|----------------------------|-----------------------------------------|------------------|-------|
|                            |                                         | (4)              | (5)   |
|                            | 502300005                               | ,000             | ,000  |
|                            | 502300006                               | ,000             | ,000  |
|                            | 502300007                               | ,000             | ,000  |
|                            | 502300214                               | ,000             | ,000  |
|                            | 502300411                               | ,000             | ,000  |
|                            | 502300415                               | ,000             | ,000  |
|                            | 502300416                               | ,000             | ,000  |
|                            | 502300811                               | ,000             | ,000  |
|                            | 502300913                               | ,000             | ,000  |
| weekday veckodag           | 1 måndag                                | ,000             | ,000  |
|                            | 2 tisdag                                | ,000             | ,000  |
|                            | 3 onsdag                                | ,000             | ,000  |
|                            | 4 torsdag                               | ,000             | ,000  |
|                            | 5 fredag                                | 1,000            | ,000  |
|                            | 6 lördag                                | ,000             | 1,000 |
|                            | 7 söndag                                | ,000             | ,000  |
| season säsong/period       | 1 januari-mars                          | ,000             |       |
|                            | 2 april-maj                             | ,000             |       |
|                            | 3 juni-augusti                          | ,000             |       |
|                            | 4 september-oktober                     | ,000             |       |
|                            | 5 november-december                     | 1,000            |       |
| sv5 kvintiler för standard | 1 tredje kvintilen                      | ,000             |       |
|                            | 2 första kvintilen                      | ,000             |       |
|                            | 3 andra kvintilen                       | ,000             |       |
|                            | 4 fjärde kvintilen                      | ,000             |       |
|                            | 5 femte kvintilen                       | 1,000            |       |
| holiday större helg        | 1 ingen större helg                     |                  |       |
|                            | 2 större helg (påsk/midsommar/julonyår) |                  |       |

## Categorical Variables Codings

|                            |                                         | Parameter coding |      |
|----------------------------|-----------------------------------------|------------------|------|
|                            |                                         | (6)              | (7)  |
|                            | 502300005                               | ,000             | ,000 |
|                            | 502300006                               | ,000             | ,000 |
|                            | 502300007                               | ,000             | ,000 |
|                            | 502300214                               | ,000             | ,000 |
|                            | 502300411                               | ,000             | ,000 |
|                            | 502300415                               | ,000             | ,000 |
|                            | 502300416                               | ,000             | ,000 |
|                            | 502300811                               | ,000             | ,000 |
|                            | 502300913                               | ,000             | ,000 |
| weekday veckodag           | 1 måndag                                | ,000             |      |
|                            | 2 tisdag                                | ,000             |      |
|                            | 3 onsdag                                | ,000             |      |
|                            | 4 torsdag                               | ,000             |      |
|                            | 5 fredag                                | ,000             |      |
|                            | 6 lördag                                | ,000             |      |
|                            | 7 söndag                                | 1,000            |      |
| season säsong/period       | 1 januari-mars                          |                  |      |
|                            | 2 april-maj                             |                  |      |
|                            | 3 juni-augusti                          |                  |      |
|                            | 4 september-oktober                     |                  |      |
|                            | 5 november-december                     |                  |      |
| sv5 kvintiler för standard | 1 tredje kvintilen                      |                  |      |
|                            | 2 första kvintilen                      |                  |      |
|                            | 3 andra kvintilen                       |                  |      |
|                            | 4 fjärde kvintilen                      |                  |      |
|                            | 5 femte kvintilen                       |                  |      |
| holiday större helg        | 1 ingen större helg                     |                  |      |
|                            | 2 större helg (påsk/midsommar/julonyår) |                  |      |



## Categorical Variables Codings

|                            |                                         | Parameter coding |      |
|----------------------------|-----------------------------------------|------------------|------|
|                            |                                         | (8)              | (9)  |
|                            | 502300005                               | ,000             | ,000 |
|                            | 502300006                               | ,000             | ,000 |
|                            | 502300007                               | ,000             | ,000 |
|                            | 502300214                               | ,000             | ,000 |
|                            | 502300411                               | ,000             | ,000 |
|                            | 502300415                               | ,000             | ,000 |
|                            | 502300416                               | ,000             | ,000 |
|                            | 502300811                               | ,000             | ,000 |
|                            | 502300913                               | ,000             | ,000 |
| weekday veckodag           | 1 måndag                                |                  |      |
|                            | 2 tisdag                                |                  |      |
|                            | 3 onsdag                                |                  |      |
|                            | 4 torsdag                               |                  |      |
|                            | 5 fredag                                |                  |      |
|                            | 6 lördag                                |                  |      |
|                            | 7 söndag                                |                  |      |
| season säsong/period       | 1 januari-mars                          |                  |      |
|                            | 2 april-maj                             |                  |      |
|                            | 3 juni-augusti                          |                  |      |
|                            | 4 september-oktober                     |                  |      |
|                            | 5 november-december                     |                  |      |
| sv5 kvintiler för standard | 1 tredje kvintilen                      |                  |      |
|                            | 2 första kvintilen                      |                  |      |
|                            | 3 andra kvintilen                       |                  |      |
|                            | 4 fjärde kvintilen                      |                  |      |
|                            | 5 femte kvintilen                       |                  |      |
| holiday större helg        | 1 ingen större helg                     |                  |      |
|                            | 2 större helg (påsk/midsommar/julonyår) |                  |      |

## Categorical Variables Codings

|                            |                                         | Parameter coding |      |
|----------------------------|-----------------------------------------|------------------|------|
|                            |                                         | (10)             | (11) |
|                            | 502300005                               | ,000             | ,000 |
|                            | 502300006                               | ,000             | ,000 |
|                            | 502300007                               | ,000             | ,000 |
|                            | 502300214                               | ,000             | ,000 |
|                            | 502300411                               | ,000             | ,000 |
|                            | 502300415                               | ,000             | ,000 |
|                            | 502300416                               | ,000             | ,000 |
|                            | 502300811                               | ,000             | ,000 |
|                            | 502300913                               | ,000             | ,000 |
| weekday veckodag           | 1 måndag                                |                  |      |
|                            | 2 tisdag                                |                  |      |
|                            | 3 onsdag                                |                  |      |
|                            | 4 torsdag                               |                  |      |
|                            | 5 fredag                                |                  |      |
|                            | 6 lördag                                |                  |      |
|                            | 7 söndag                                |                  |      |
| season säsong/period       | 1 januari-mars                          |                  |      |
|                            | 2 april-maj                             |                  |      |
|                            | 3 juni-augusti                          |                  |      |
|                            | 4 september-oktober                     |                  |      |
|                            | 5 november-december                     |                  |      |
| sv5 kvintiler för standard | 1 tredje kvintilen                      |                  |      |
|                            | 2 första kvintilen                      |                  |      |
|                            | 3 andra kvintilen                       |                  |      |
|                            | 4 fjärde kvintilen                      |                  |      |
|                            | 5 femte kvintilen                       |                  |      |
| holiday större helg        | 1 ingen större helg                     |                  |      |
|                            | 2 större helg (påsk/midsommar/julonyår) |                  |      |

## Categorical Variables Codings

|                            |                                         | Parameter coding |      |
|----------------------------|-----------------------------------------|------------------|------|
|                            |                                         | (12)             | (13) |
|                            | 502300005                               | ,000             | ,000 |
|                            | 502300006                               | ,000             | ,000 |
|                            | 502300007                               | ,000             | ,000 |
|                            | 502300214                               | ,000             | ,000 |
|                            | 502300411                               | ,000             | ,000 |
|                            | 502300415                               | ,000             | ,000 |
|                            | 502300416                               | ,000             | ,000 |
|                            | 502300811                               | ,000             | ,000 |
|                            | 502300913                               | ,000             | ,000 |
| weekday veckodag           | 1 måndag                                |                  |      |
|                            | 2 tisdag                                |                  |      |
|                            | 3 onsdag                                |                  |      |
|                            | 4 torsdag                               |                  |      |
|                            | 5 fredag                                |                  |      |
|                            | 6 lördag                                |                  |      |
|                            | 7 söndag                                |                  |      |
| season säsong/period       | 1 januari-mars                          |                  |      |
|                            | 2 april-maj                             |                  |      |
|                            | 3 juni-augusti                          |                  |      |
|                            | 4 september-oktober                     |                  |      |
|                            | 5 november-december                     |                  |      |
| sv5 kvintiler för standard | 1 tredje kvintilen                      |                  |      |
|                            | 2 första kvintilen                      |                  |      |
|                            | 3 andra kvintilen                       |                  |      |
|                            | 4 fjärde kvintilen                      |                  |      |
|                            | 5 femte kvintilen                       |                  |      |
| holiday större helg        | 1 ingen större helg                     |                  |      |
|                            | 2 större helg (påsk/midsommar/julonyår) |                  |      |

## Categorical Variables Codings

|                            |                                         | Parameter coding |      |
|----------------------------|-----------------------------------------|------------------|------|
|                            |                                         | (14)             | (15) |
|                            | 502300005                               | ,000             | ,000 |
|                            | 502300006                               | ,000             | ,000 |
|                            | 502300007                               | ,000             | ,000 |
|                            | 502300214                               | ,000             | ,000 |
|                            | 502300411                               | ,000             | ,000 |
|                            | 502300415                               | ,000             | ,000 |
|                            | 502300416                               | ,000             | ,000 |
|                            | 502300811                               | ,000             | ,000 |
|                            | 502300913                               | ,000             | ,000 |
| weekday veckodag           | 1 måndag                                |                  |      |
|                            | 2 tisdag                                |                  |      |
|                            | 3 onsdag                                |                  |      |
|                            | 4 torsdag                               |                  |      |
|                            | 5 fredag                                |                  |      |
|                            | 6 lördag                                |                  |      |
|                            | 7 söndag                                |                  |      |
| season säsong/period       | 1 januari-mars                          |                  |      |
|                            | 2 april-maj                             |                  |      |
|                            | 3 juni-augusti                          |                  |      |
|                            | 4 september-oktober                     |                  |      |
|                            | 5 november-december                     |                  |      |
| sv5 kvintiler för standard | 1 tredje kvintilen                      |                  |      |
|                            | 2 första kvintilen                      |                  |      |
|                            | 3 andra kvintilen                       |                  |      |
|                            | 4 fjärde kvintilen                      |                  |      |
|                            | 5 femte kvintilen                       |                  |      |
| holiday större helg        | 1 ingen större helg                     |                  |      |
|                            | 2 större helg (påsk/midsommar/julonyår) |                  |      |

## Categorical Variables Codings

|                            |                                         | Parameter coding |      |
|----------------------------|-----------------------------------------|------------------|------|
|                            |                                         | (16)             | (17) |
|                            | 502300005                               | ,000             | ,000 |
|                            | 502300006                               | ,000             | ,000 |
|                            | 502300007                               | ,000             | ,000 |
|                            | 502300214                               | ,000             | ,000 |
|                            | 502300411                               | ,000             | ,000 |
|                            | 502300415                               | ,000             | ,000 |
|                            | 502300416                               | ,000             | ,000 |
|                            | 502300811                               | ,000             | ,000 |
|                            | 502300913                               | ,000             | ,000 |
| weekday veckodag           | 1 måndag                                |                  |      |
|                            | 2 tisdag                                |                  |      |
|                            | 3 onsdag                                |                  |      |
|                            | 4 torsdag                               |                  |      |
|                            | 5 fredag                                |                  |      |
|                            | 6 lördag                                |                  |      |
|                            | 7 söndag                                |                  |      |
| season säsong/period       | 1 januari-mars                          |                  |      |
|                            | 2 april-maj                             |                  |      |
|                            | 3 juni-augusti                          |                  |      |
|                            | 4 september-oktober                     |                  |      |
|                            | 5 november-december                     |                  |      |
| sv5 kvintiler för standard | 1 tredje kvintilen                      |                  |      |
|                            | 2 första kvintilen                      |                  |      |
|                            | 3 andra kvintilen                       |                  |      |
|                            | 4 fjärde kvintilen                      |                  |      |
|                            | 5 femte kvintilen                       |                  |      |
| holiday större helg        | 1 ingen större helg                     |                  |      |
|                            | 2 större helg (påsk/midsommar/julonyår) |                  |      |

## Categorical Variables Codings

|                            |                                         | Parameter coding |      |
|----------------------------|-----------------------------------------|------------------|------|
|                            |                                         | (18)             | (19) |
|                            | 502300005                               | ,000             | ,000 |
|                            | 502300006                               | ,000             | ,000 |
|                            | 502300007                               | ,000             | ,000 |
|                            | 502300214                               | ,000             | ,000 |
|                            | 502300411                               | ,000             | ,000 |
|                            | 502300415                               | ,000             | ,000 |
|                            | 502300416                               | ,000             | ,000 |
|                            | 502300811                               | ,000             | ,000 |
|                            | 502300913                               | ,000             | ,000 |
| weekday veckodag           | 1 måndag                                |                  |      |
|                            | 2 tisdag                                |                  |      |
|                            | 3 onsdag                                |                  |      |
|                            | 4 torsdag                               |                  |      |
|                            | 5 fredag                                |                  |      |
|                            | 6 lördag                                |                  |      |
|                            | 7 söndag                                |                  |      |
| season säsong/period       | 1 januari-mars                          |                  |      |
|                            | 2 april-maj                             |                  |      |
|                            | 3 juni-augusti                          |                  |      |
|                            | 4 september-oktober                     |                  |      |
|                            | 5 november-december                     |                  |      |
| sv5 kvintiler för standard | 1 tredje kvintilen                      |                  |      |
|                            | 2 första kvintilen                      |                  |      |
|                            | 3 andra kvintilen                       |                  |      |
|                            | 4 fjärde kvintilen                      |                  |      |
|                            | 5 femte kvintilen                       |                  |      |
| holiday större helg        | 1 ingen större helg                     |                  |      |
|                            | 2 större helg (påsk/midsommar/julonyår) |                  |      |

## Categorical Variables Codings

|                            |                                         | Parameter coding |      |
|----------------------------|-----------------------------------------|------------------|------|
|                            |                                         | (20)             | (21) |
|                            | 502300005                               | ,000             | ,000 |
|                            | 502300006                               | ,000             | ,000 |
|                            | 502300007                               | ,000             | ,000 |
|                            | 502300214                               | ,000             | ,000 |
|                            | 502300411                               | ,000             | ,000 |
|                            | 502300415                               | ,000             | ,000 |
|                            | 502300416                               | ,000             | ,000 |
|                            | 502300811                               | ,000             | ,000 |
|                            | 502300913                               | ,000             | ,000 |
| weekday veckodag           | 1 måndag                                |                  |      |
|                            | 2 tisdag                                |                  |      |
|                            | 3 onsdag                                |                  |      |
|                            | 4 torsdag                               |                  |      |
|                            | 5 fredag                                |                  |      |
|                            | 6 lördag                                |                  |      |
|                            | 7 söndag                                |                  |      |
| season säsong/period       | 1 januari-mars                          |                  |      |
|                            | 2 april-maj                             |                  |      |
|                            | 3 juni-augusti                          |                  |      |
|                            | 4 september-oktober                     |                  |      |
|                            | 5 november-december                     |                  |      |
| sv5 kvintiler för standard | 1 tredje kvintilen                      |                  |      |
|                            | 2 första kvintilen                      |                  |      |
|                            | 3 andra kvintilen                       |                  |      |
|                            | 4 fjärde kvintilen                      |                  |      |
|                            | 5 femte kvintilen                       |                  |      |
| holiday större helg        | 1 ingen större helg                     |                  |      |
|                            | 2 större helg (påsk/midsommar/julonyår) |                  |      |

## Categorical Variables Codings

|                            |                                         | Parameter coding |      |
|----------------------------|-----------------------------------------|------------------|------|
|                            |                                         | (22)             | (23) |
|                            | 502300005                               | ,000             | ,000 |
|                            | 502300006                               | ,000             | ,000 |
|                            | 502300007                               | ,000             | ,000 |
|                            | 502300214                               | ,000             | ,000 |
|                            | 502300411                               | ,000             | ,000 |
|                            | 502300415                               | ,000             | ,000 |
|                            | 502300416                               | ,000             | ,000 |
|                            | 502300811                               | ,000             | ,000 |
|                            | 502300913                               | ,000             | ,000 |
| weekday veckodag           | 1 måndag                                |                  |      |
|                            | 2 tisdag                                |                  |      |
|                            | 3 onsdag                                |                  |      |
|                            | 4 torsdag                               |                  |      |
|                            | 5 fredag                                |                  |      |
|                            | 6 lördag                                |                  |      |
|                            | 7 söndag                                |                  |      |
| season säsong/period       | 1 januari-mars                          |                  |      |
|                            | 2 april-maj                             |                  |      |
|                            | 3 juni-augusti                          |                  |      |
|                            | 4 september-oktober                     |                  |      |
|                            | 5 november-december                     |                  |      |
| sv5 kvintiler för standard | 1 tredje kvintilen                      |                  |      |
|                            | 2 första kvintilen                      |                  |      |
|                            | 3 andra kvintilen                       |                  |      |
|                            | 4 fjärde kvintilen                      |                  |      |
|                            | 5 femte kvintilen                       |                  |      |
| holiday större helg        | 1 ingen större helg                     |                  |      |
|                            | 2 större helg (påsk/midsommar/julonyår) |                  |      |



## Categorical Variables Codings

|                            |                                         | Parameter coding |      |
|----------------------------|-----------------------------------------|------------------|------|
|                            |                                         | (24)             | (25) |
|                            | 502300005                               | ,000             | ,000 |
|                            | 502300006                               | ,000             | ,000 |
|                            | 502300007                               | ,000             | ,000 |
|                            | 502300214                               | ,000             | ,000 |
|                            | 502300411                               | ,000             | ,000 |
|                            | 502300415                               | ,000             | ,000 |
|                            | 502300416                               | ,000             | ,000 |
|                            | 502300811                               | ,000             | ,000 |
|                            | 502300913                               | ,000             | ,000 |
| weekday veckodag           | 1 måndag                                |                  |      |
|                            | 2 tisdag                                |                  |      |
|                            | 3 onsdag                                |                  |      |
|                            | 4 torsdag                               |                  |      |
|                            | 5 fredag                                |                  |      |
|                            | 6 lördag                                |                  |      |
|                            | 7 söndag                                |                  |      |
| season säsong/period       | 1 januari-mars                          |                  |      |
|                            | 2 april-maj                             |                  |      |
|                            | 3 juni-augusti                          |                  |      |
|                            | 4 september-oktober                     |                  |      |
|                            | 5 november-december                     |                  |      |
| sv5 kvintiler för standard | 1 tredje kvintilen                      |                  |      |
|                            | 2 första kvintilen                      |                  |      |
|                            | 3 andra kvintilen                       |                  |      |
|                            | 4 fjärde kvintilen                      |                  |      |
|                            | 5 femte kvintilen                       |                  |      |
| holiday större helg        | 1 ingen större helg                     |                  |      |
|                            | 2 större helg (påsk/midsommar/julonyår) |                  |      |

## Categorical Variables Codings

|                            |                                         | Parameter coding |       |
|----------------------------|-----------------------------------------|------------------|-------|
|                            |                                         | (26)             | (27)  |
|                            | 502300005                               | ,000             | 1,000 |
|                            | 502300006                               | ,000             | ,000  |
|                            | 502300007                               | ,000             | ,000  |
|                            | 502300214                               | ,000             | ,000  |
|                            | 502300411                               | ,000             | ,000  |
|                            | 502300415                               | ,000             | ,000  |
|                            | 502300416                               | ,000             | ,000  |
|                            | 502300811                               | ,000             | ,000  |
|                            | 502300913                               | ,000             | ,000  |
| weekday veckodag           | 1 måndag                                |                  |       |
|                            | 2 tisdag                                |                  |       |
|                            | 3 onsdag                                |                  |       |
|                            | 4 torsdag                               |                  |       |
|                            | 5 fredag                                |                  |       |
|                            | 6 lördag                                |                  |       |
|                            | 7 söndag                                |                  |       |
| season säsong/period       | 1 januari-mars                          |                  |       |
|                            | 2 april-maj                             |                  |       |
|                            | 3 juni-augusti                          |                  |       |
|                            | 4 september-oktober                     |                  |       |
|                            | 5 november-december                     |                  |       |
| sv5 kvintiler för standard | 1 tredje kvintilen                      |                  |       |
|                            | 2 första kvintilen                      |                  |       |
|                            | 3 andra kvintilen                       |                  |       |
|                            | 4 fjärde kvintilen                      |                  |       |
|                            | 5 femte kvintilen                       |                  |       |
| holiday större helg        | 1 ingen större helg                     |                  |       |
|                            | 2 större helg (påsk/midsommar/julonyår) |                  |       |

## Categorical Variables Codings

|                            |                                         | Parameter coding |       |
|----------------------------|-----------------------------------------|------------------|-------|
|                            |                                         | (28)             | (29)  |
|                            | 502300005                               | ,000             | ,000  |
|                            | 502300006                               | 1,000            | ,000  |
|                            | 502300007                               | ,000             | 1,000 |
|                            | 502300214                               | ,000             | ,000  |
|                            | 502300411                               | ,000             | ,000  |
|                            | 502300415                               | ,000             | ,000  |
|                            | 502300416                               | ,000             | ,000  |
|                            | 502300811                               | ,000             | ,000  |
|                            | 502300913                               | ,000             | ,000  |
| weekday veckodag           | 1 måndag                                |                  |       |
|                            | 2 tisdag                                |                  |       |
|                            | 3 onsdag                                |                  |       |
|                            | 4 torsdag                               |                  |       |
|                            | 5 fredag                                |                  |       |
|                            | 6 lördag                                |                  |       |
|                            | 7 söndag                                |                  |       |
| season säsong/period       | 1 januari-mars                          |                  |       |
|                            | 2 april-maj                             |                  |       |
|                            | 3 juni-augusti                          |                  |       |
|                            | 4 september-oktober                     |                  |       |
|                            | 5 november-december                     |                  |       |
| sv5 kvintiler för standard | 1 tredje kvintilen                      |                  |       |
|                            | 2 första kvintilen                      |                  |       |
|                            | 3 andra kvintilen                       |                  |       |
|                            | 4 fjärde kvintilen                      |                  |       |
|                            | 5 femte kvintilen                       |                  |       |
| holiday större helg        | 1 ingen större helg                     |                  |       |
|                            | 2 större helg (påsk/midsommar/julonyår) |                  |       |

## Categorical Variables Codings

|                            |                                         | Parameter coding |       |
|----------------------------|-----------------------------------------|------------------|-------|
|                            |                                         | (30)             | (31)  |
|                            | 502300005                               | ,000             | ,000  |
|                            | 502300006                               | ,000             | ,000  |
|                            | 502300007                               | ,000             | ,000  |
|                            | 502300214                               | 1,000            | ,000  |
|                            | 502300411                               | ,000             | 1,000 |
|                            | 502300415                               | ,000             | ,000  |
|                            | 502300416                               | ,000             | ,000  |
|                            | 502300811                               | ,000             | ,000  |
|                            | 502300913                               | ,000             | ,000  |
| weekday veckodag           | 1 måndag                                |                  |       |
|                            | 2 tisdag                                |                  |       |
|                            | 3 onsdag                                |                  |       |
|                            | 4 torsdag                               |                  |       |
|                            | 5 fredag                                |                  |       |
|                            | 6 lördag                                |                  |       |
|                            | 7 söndag                                |                  |       |
| season säsong/period       | 1 januari-mars                          |                  |       |
|                            | 2 april-maj                             |                  |       |
|                            | 3 juni-augusti                          |                  |       |
|                            | 4 september-oktober                     |                  |       |
|                            | 5 november-december                     |                  |       |
| sv5 kvintiler för standard | 1 tredje kvintilen                      |                  |       |
|                            | 2 första kvintilen                      |                  |       |
|                            | 3 andra kvintilen                       |                  |       |
|                            | 4 fjärde kvintilen                      |                  |       |
|                            | 5 femte kvintilen                       |                  |       |
| holiday större helg        | 1 ingen större helg                     |                  |       |
|                            | 2 större helg (påsk/midsommar/julonyår) |                  |       |

## Categorical Variables Codings

|                            |                                         | Parameter coding |       |
|----------------------------|-----------------------------------------|------------------|-------|
|                            |                                         | (32)             | (33)  |
|                            | 502300005                               | ,000             | ,000  |
|                            | 502300006                               | ,000             | ,000  |
|                            | 502300007                               | ,000             | ,000  |
|                            | 502300214                               | ,000             | ,000  |
|                            | 502300411                               | ,000             | ,000  |
|                            | 502300415                               | 1,000            | ,000  |
|                            | 502300416                               | ,000             | 1,000 |
|                            | 502300811                               | ,000             | ,000  |
|                            | 502300913                               | ,000             | ,000  |
| weekday veckodag           | 1 måndag                                |                  |       |
|                            | 2 tisdag                                |                  |       |
|                            | 3 onsdag                                |                  |       |
|                            | 4 torsdag                               |                  |       |
|                            | 5 fredag                                |                  |       |
|                            | 6 lördag                                |                  |       |
|                            | 7 söndag                                |                  |       |
| season säsong/period       | 1 januari-mars                          |                  |       |
|                            | 2 april-maj                             |                  |       |
|                            | 3 juni-augusti                          |                  |       |
|                            | 4 september-oktober                     |                  |       |
|                            | 5 november-december                     |                  |       |
| sv5 kvintiler för standard | 1 tredje kvintilen                      |                  |       |
|                            | 2 första kvintilen                      |                  |       |
|                            | 3 andra kvintilen                       |                  |       |
|                            | 4 fjärde kvintilen                      |                  |       |
|                            | 5 femte kvintilen                       |                  |       |
| holiday större helg        | 1 ingen större helg                     |                  |       |
|                            | 2 större helg (påsk/midsommar/julonyår) |                  |       |

## Categorical Variables Codings

|                            |                                         | Parameter coding |       |
|----------------------------|-----------------------------------------|------------------|-------|
|                            |                                         | (34)             | (35)  |
|                            | 502300005                               | ,000             | ,000  |
|                            | 502300006                               | ,000             | ,000  |
|                            | 502300007                               | ,000             | ,000  |
|                            | 502300214                               | ,000             | ,000  |
|                            | 502300411                               | ,000             | ,000  |
|                            | 502300415                               | ,000             | ,000  |
|                            | 502300416                               | ,000             | ,000  |
|                            | 502300811                               | 1,000            | ,000  |
|                            | 502300913                               | ,000             | 1,000 |
| weekday veckodag           | 1 måndag                                |                  |       |
|                            | 2 tisdag                                |                  |       |
|                            | 3 onsdag                                |                  |       |
|                            | 4 torsdag                               |                  |       |
|                            | 5 fredag                                |                  |       |
|                            | 6 lördag                                |                  |       |
|                            | 7 söndag                                |                  |       |
| season säsong/period       | 1 januari-mars                          |                  |       |
|                            | 2 april-maj                             |                  |       |
|                            | 3 juni-augusti                          |                  |       |
|                            | 4 september-oktober                     |                  |       |
|                            | 5 november-december                     |                  |       |
| sv5 kvintiler för standard | 1 tredje kvintilen                      |                  |       |
|                            | 2 första kvintilen                      |                  |       |
|                            | 3 andra kvintilen                       |                  |       |
|                            | 4 fjärde kvintilen                      |                  |       |
|                            | 5 femte kvintilen                       |                  |       |
| holiday större helg        | 1 ingen större helg                     |                  |       |
|                            | 2 större helg (påsk/midsommar/julonyår) |                  |       |

## Block 0: Beginning Block

Classification Table<sup>a,b</sup>

|        |                                                   |                                                              |
|--------|---------------------------------------------------|--------------------------------------------------------------|
|        | Observed                                          |                                                              |
| Step 0 | seuraust3 seuraus highest = haitta (i någon form) | 0 ingen händelse eller ei haittaa<br>1 haitta (i någon form) |
|        | Overall Percentage                                |                                                              |

Classification Table<sup>a,b</sup>

|        |                                                   |                                                              |                                         |
|--------|---------------------------------------------------|--------------------------------------------------------------|-----------------------------------------|
|        |                                                   |                                                              | Predicted                               |
|        |                                                   |                                                              | seuraust3<br>seuraus highest            |
|        |                                                   |                                                              | 0 ingen<br>händelse eller<br>ei haittaa |
|        | Observed                                          |                                                              |                                         |
| Step 0 | seuraust3 seuraus highest = haitta (i någon form) | 0 ingen händelse eller ei haittaa<br>1 haitta (i någon form) | 12075<br>400                            |
|        | Overall Percentage                                |                                                              |                                         |

Classification Table<sup>a,b</sup>

|        |                                                   |                                                              |                                 |
|--------|---------------------------------------------------|--------------------------------------------------------------|---------------------------------|
|        |                                                   |                                                              | Predicted                       |
|        |                                                   |                                                              | seuraust3<br>seuraus highest .. |
|        |                                                   |                                                              | 1 haitta (i<br>någon form)      |
|        | Observed                                          |                                                              |                                 |
| Step 0 | seuraust3 seuraus highest = haitta (i någon form) | 0 ingen händelse eller ei haittaa<br>1 haitta (i någon form) | 0<br>0                          |
|        | Overall Percentage                                |                                                              |                                 |

Classification Table<sup>a,b</sup>

|        |                                                   |                                                              |                       |
|--------|---------------------------------------------------|--------------------------------------------------------------|-----------------------|
|        |                                                   |                                                              | Predicted             |
|        |                                                   |                                                              |                       |
|        |                                                   |                                                              | Percentage<br>Correct |
|        | Observed                                          |                                                              |                       |
| Step 0 | seuraust3 seuraus highest = haitta (i någon form) | 0 ingen händelse eller ei haittaa<br>1 haitta (i någon form) | 100,0<br>,0           |
|        | Overall Percentage                                |                                                              | 96,8                  |

a. Constant is included in the model.

b. The cut value is ,500

## Variables in the Equation

|                 | B      | S.E. | Wald     | df | Sig. | Exp(B) |
|-----------------|--------|------|----------|----|------|--------|
| Step 0 Constant | -3,407 | ,051 | 4495,313 | 1  | ,000 | ,033   |

## Variables not in the Equation

|                      | Score   | df | Sig. |
|----------------------|---------|----|------|
| Step 0 Variables sv5 | 17,499  | 4  | ,002 |
| sv5(1)               | 6,383   | 1  | ,012 |
| sv5(2)               | 2,772   | 1  | ,096 |
| sv5(3)               | 1,836   | 1  | ,175 |
| sv5(4)               | 11,375  | 1  | ,001 |
| VASTY2               | 321,056 | 35 | ,000 |
| VASTY2(1)            | 1,769   | 1  | ,184 |
| VASTY2(2)            | 27,206  | 1  | ,000 |
| VASTY2(3)            | 8,562   | 1  | ,003 |
| VASTY2(4)            | ,988    | 1  | ,320 |
| VASTY2(5)            | ,587    | 1  | ,444 |
| VASTY2(6)            | 8,528   | 1  | ,003 |
| VASTY2(7)            | 2,666   | 1  | ,103 |
| VASTY2(8)            | ,008    | 1  | ,929 |
| VASTY2(9)            | 19,221  | 1  | ,000 |
| VASTY2(10)           | 58,192  | 1  | ,000 |
| VASTY2(11)           | 21,278  | 1  | ,000 |
| VASTY2(12)           | 2,551   | 1  | ,110 |
| VASTY2(13)           | 62,883  | 1  | ,000 |
| VASTY2(14)           | ,045    | 1  | ,832 |
| VASTY2(15)           | 8,562   | 1  | ,003 |
| VASTY2(16)           | 1,322   | 1  | ,250 |
| VASTY2(17)           | 2,012   | 1  | ,156 |
| VASTY2(18)           | 6,791   | 1  | ,009 |
| VASTY2(19)           | 10,418  | 1  | ,001 |
| VASTY2(20)           | ,662    | 1  | ,416 |
| VASTY2(21)           | 8,562   | 1  | ,003 |
| VASTY2(22)           | 5,396   | 1  | ,020 |
| VASTY2(23)           | ,045    | 1  | ,832 |
| VASTY2(24)           | 5,427   | 1  | ,020 |
| VASTY2(25)           | 6,092   | 1  | ,014 |
| VASTY2(26)           | 7,868   | 1  | ,005 |
| VASTY2(27)           | 5,427   | 1  | ,020 |
| VASTY2(28)           | ,715    | 1  | ,398 |
| VASTY2(29)           | 2,983   | 1  | ,084 |
| VASTY2(30)           | 2,034   | 1  | ,154 |
| VASTY2(31)           | 30,255  | 1  | ,000 |
| VASTY2(32)           | 1,902   | 1  | ,168 |
| VASTY2(33)           | 1,968   | 1  | ,161 |



**Variables not in the Equation**

|                    | Score   | df | Sig. |
|--------------------|---------|----|------|
| VASTY2(34)         | 6,856   | 1  | ,009 |
| VASTY2(35)         | ,127    | 1  | ,722 |
| weekday            | 12,260  | 6  | ,056 |
| weekday(1)         | 2,946   | 1  | ,086 |
| weekday(2)         | ,062    | 1  | ,804 |
| weekday(3)         | ,254    | 1  | ,615 |
| weekday(4)         | 2,864   | 1  | ,091 |
| weekday(5)         | ,463    | 1  | ,496 |
| weekday(6)         | 7,621   | 1  | ,006 |
| holiday(1)         | 1,875   | 1  | ,171 |
| season             | 11,711  | 4  | ,020 |
| season(1)          | ,494    | 1  | ,482 |
| season(2)          | ,040    | 1  | ,842 |
| season(3)          | 3,188   | 1  | ,074 |
| season(4)          | 8,641   | 1  | ,003 |
| Overall Statistics | 350,699 | 50 | ,000 |

**Block 1: Method = Enter**

**Omnibus Tests of Model Coefficients**

|             | Chi-square | df | Sig. |
|-------------|------------|----|------|
| Step 1 Step | 327,567    | 50 | ,000 |
| Block       | 327,567    | 50 | ,000 |
| Model       | 327,567    | 50 | ,000 |

**Model Summary**

| Step | -2 Log likelihood     | Cox & Snell R Square | Nagelkerke R Square |
|------|-----------------------|----------------------|---------------------|
| 1    | 3211,482 <sup>a</sup> | ,026                 | ,105                |

a. Estimation terminated at iteration number 9 because parameter estimates changed by less than ,001.

**Classification Table<sup>a</sup>**

| Observed           |                                                   |                                                              |
|--------------------|---------------------------------------------------|--------------------------------------------------------------|
| Step 1             | seuraust3 seuraus highest = haitta (i någon form) | 0 ingen händelse eller ei haittaa<br>1 haitta (i någon form) |
| Overall Percentage |                                                   |                                                              |

Classification Table<sup>a</sup>

|                    |                                                    | Predicted                         |                                         |
|--------------------|----------------------------------------------------|-----------------------------------|-----------------------------------------|
| Observed           |                                                    | seurauslt3<br>seuraus highest     | 0 ingen<br>händelse eller<br>ei haittaa |
| Step 1             | seurauslt3 seuraus highest = haitta (i någon form) | 0 ingen händelse eller ei haittaa | 12075                                   |
|                    |                                                    | 1 haitta (i någon form)           | 400                                     |
| Overall Percentage |                                                    |                                   |                                         |

Classification Table<sup>a</sup>

|                    |                                                    | Predicted                         |                            |
|--------------------|----------------------------------------------------|-----------------------------------|----------------------------|
| Observed           |                                                    | seurauslt3<br>seuraus highest ..  | 1 haitta (i<br>någon form) |
| Step 1             | seurauslt3 seuraus highest = haitta (i någon form) | 0 ingen händelse eller ei haittaa | 0                          |
|                    |                                                    | 1 haitta (i någon form)           | 0                          |
| Overall Percentage |                                                    |                                   |                            |

Classification Table<sup>a</sup>

|                    |                                                    | Predicted                         |       |
|--------------------|----------------------------------------------------|-----------------------------------|-------|
| Observed           |                                                    | Percentage<br>Correct             |       |
| Step 1             | seurauslt3 seuraus highest = haitta (i någon form) | 0 ingen händelse eller ei haittaa | 100,0 |
|                    |                                                    | 1 haitta (i någon form)           | ,0    |
| Overall Percentage |                                                    |                                   | 96,8  |

a. The cut value is ,500

## Variables in the Equation

|                     |            | B      | S.E.  | Wald    | df | Sig. | Exp(B) |
|---------------------|------------|--------|-------|---------|----|------|--------|
| Step 1 <sup>a</sup> | sv5        |        |       | 2,569   | 4  | ,632 |        |
|                     | sv5(1)     | ,047   | ,199  | ,056    | 1  | ,813 | 1,048  |
|                     | sv5(2)     | -,118  | ,208  | ,319    | 1  | ,572 | ,889   |
|                     | sv5(3)     | ,103   | ,182  | ,321    | 1  | ,571 | 1,109  |
|                     | sv5(4)     | ,214   | ,196  | 1,196   | 1  | ,274 | 1,239  |
|                     | VASTY2     |        |       | 218,078 | 35 | ,000 |        |
|                     | VASTY2(1)  | ,554   | ,426  | 1,693   | 1  | ,193 | 1,739  |
|                     | VASTY2(2)  | 1,116  | ,398  | 7,852   | 1  | ,005 | 3,053  |
|                     | VASTY2(3)  | -1,511 | ,786  | 3,699   | 1  | ,054 | ,221   |
|                     | VASTY2(4)  | ,529   | ,429  | 1,521   | 1  | ,217 | 1,698  |
|                     | VASTY2(5)  | ,514   | ,444  | 1,341   | 1  | ,247 | 1,673  |
|                     | VASTY2(6)  | -1,682 | ,795  | 4,481   | 1  | ,034 | ,186   |
|                     | VASTY2(7)  | ,668   | ,420  | 2,530   | 1  | ,112 | 1,950  |
|                     | VASTY2(8)  | ,341   | ,450  | ,575    | 1  | ,448 | 1,407  |
|                     | VASTY2(9)  | 1,137  | ,397  | 8,198   | 1  | ,004 | 3,117  |
|                     | VASTY2(10) | 1,364  | ,393  | 12,063  | 1  | ,001 | 3,913  |
|                     | VASTY2(11) | 1,140  | ,393  | 8,406   | 1  | ,004 | 3,125  |
|                     | VASTY2(12) | ,556   | ,426  | 1,704   | 1  | ,192 | 1,744  |
|                     | VASTY2(13) | 1,379  | ,395  | 12,219  | 1  | ,000 | 3,972  |
|                     | VASTY2(14) | ,121   | ,460  | ,069    | 1  | ,793 | 1,128  |
|                     | VASTY2(15) | -1,646 | ,791  | 4,336   | 1  | ,037 | ,193   |
|                     | VASTY2(16) | -,559  | ,676  | ,683    | 1  | ,408 | ,572   |
|                     | VASTY2(17) | -,258  | ,511  | ,256    | 1  | ,613 | ,772   |
|                     | VASTY2(18) | -1,128 | ,684  | 2,718   | 1  | ,099 | ,324   |
|                     | VASTY2(19) | -2,243 | 1,066 | 4,433   | 1  | ,035 | ,106   |
|                     | VASTY2(20) | ,382   | ,454  | ,709    | 1  | ,400 | 1,466  |
|                     | VASTY2(21) | -1,529 | ,786  | 3,782   | 1  | ,052 | ,217   |
|                     | VASTY2(22) | -,836  | ,606  | 1,903   | 1  | ,168 | ,433   |
|                     | VASTY2(23) | ,189   | ,457  | ,171    | 1  | ,679 | 1,208  |
|                     | VASTY2(24) | -,892  | ,607  | 2,161   | 1  | ,142 | ,410   |
|                     | VASTY2(25) | -1,313 | ,787  | 2,780   | 1  | ,095 | ,269   |
|                     | VASTY2(26) | -2,063 | 1,058 | 3,803   | 1  | ,051 | ,127   |
|                     | VASTY2(27) | -,945  | ,610  | 2,395   | 1  | ,122 | ,389   |
|                     | VASTY2(28) | -,283  | ,581  | ,237    | 1  | ,626 | ,753   |
|                     | VASTY2(29) | -,620  | ,551  | 1,265   | 1  | ,261 | ,538   |
|                     | VASTY2(30) | -,247  | ,512  | ,233    | 1  | ,629 | ,781   |
|                     | VASTY2(31) | 1,248  | ,403  | 9,567   | 1  | ,002 | 3,483  |
|                     | VASTY2(32) | -,276  | ,527  | ,275    | 1  | ,600 | ,759   |
|                     | VASTY2(33) | -,292  | ,528  | ,306    | 1  | ,580 | ,747   |
|                     | VASTY2(34) | -1,134 | ,671  | 2,855   | 1  | ,091 | ,322   |
|                     | VASTY2(35) | ,071   | ,480  | ,022    | 1  | ,882 | 1,074  |
|                     | weekday    |        |       | 13,001  | 6  | ,043 |        |

## Variables in the Equation

|                     |            | 95% C.I. for EXP(B) |       |
|---------------------|------------|---------------------|-------|
|                     |            | Lower               | Upper |
| Step 1 <sup>a</sup> | sv5        |                     |       |
|                     | sv5(1)     | ,710                | 1,547 |
|                     | sv5(2)     | ,591                | 1,337 |
|                     | sv5(3)     | ,776                | 1,583 |
|                     | sv5(4)     | ,844                | 1,818 |
|                     | VASTY2     |                     |       |
|                     | VASTY2(1)  | ,755                | 4,005 |
|                     | VASTY2(2)  | 1,399               | 6,663 |
|                     | VASTY2(3)  | ,047                | 1,029 |
|                     | VASTY2(4)  | ,732                | 3,938 |
|                     | VASTY2(5)  | ,700                | 3,995 |
|                     | VASTY2(6)  | ,039                | ,883  |
|                     | VASTY2(7)  | ,856                | 4,441 |
|                     | VASTY2(8)  | ,583                | 3,396 |
|                     | VASTY2(9)  | 1,431               | 6,789 |
|                     | VASTY2(10) | 1,812               | 8,450 |
|                     | VASTY2(11) | 1,447               | 6,753 |
|                     | VASTY2(12) | ,757                | 4,021 |
|                     | VASTY2(13) | 1,833               | 8,609 |
|                     | VASTY2(14) | ,458                | 2,781 |
|                     | VASTY2(15) | ,041                | ,908  |
|                     | VASTY2(16) | ,152                | 2,152 |
|                     | VASTY2(17) | ,284                | 2,102 |
|                     | VASTY2(18) | ,085                | 1,237 |
|                     | VASTY2(19) | ,013                | ,856  |
|                     | VASTY2(20) | ,602                | 3,570 |
|                     | VASTY2(21) | ,046                | 1,012 |
|                     | VASTY2(22) | ,132                | 1,422 |
|                     | VASTY2(23) | ,494                | 2,957 |
|                     | VASTY2(24) | ,125                | 1,346 |
|                     | VASTY2(25) | ,058                | 1,259 |
|                     | VASTY2(26) | ,016                | 1,010 |
|                     | VASTY2(27) | ,118                | 1,286 |
|                     | VASTY2(28) | ,241                | 2,353 |
|                     | VASTY2(29) | ,183                | 1,585 |
|                     | VASTY2(30) | ,286                | 2,130 |
|                     | VASTY2(31) | 1,579               | 7,679 |
|                     | VASTY2(32) | ,270                | 2,130 |
|                     | VASTY2(33) | ,265                | 2,101 |
|                     | VASTY2(34) | ,086                | 1,199 |
|                     | VASTY2(35) | ,419                | 2,750 |
|                     | weekday    |                     |       |

## Variables in the Equation

|            | B      | S.E. | Wald   | df | Sig. | Exp(B) |
|------------|--------|------|--------|----|------|--------|
| weekday(1) | ,227   | ,185 | 1,499  | 1  | ,221 | 1,255  |
| weekday(2) | -,008  | ,195 | ,002   | 1  | ,967 | ,992   |
| weekday(3) | ,086   | ,191 | ,205   | 1  | ,651 | 1,090  |
| weekday(4) | ,250   | ,186 | 1,794  | 1  | ,180 | 1,284  |
| weekday(5) | -,053  | ,200 | ,070   | 1  | ,791 | ,948   |
| weekday(6) | -,411  | ,217 | 3,578  | 1  | ,059 | ,663   |
| holiday(1) | -,476  | ,373 | 1,629  | 1  | ,202 | ,621   |
| season     |        |      | 10,497 | 4  | ,033 |        |
| season(1)  | -,209  | ,162 | 1,666  | 1  | ,197 | ,811   |
| season(2)  | -,102  | ,146 | ,483   | 1  | ,487 | ,903   |
| season(3)  | ,068   | ,151 | ,204   | 1  | ,651 | 1,070  |
| season(4)  | -,493  | ,181 | 7,443  | 1  | ,006 | ,611   |
| Constant   | -3,602 | ,388 | 85,949 | 1  | ,000 | ,027   |

## Variables in the Equation

|            | 95% C.I. for EXP(B) |       |
|------------|---------------------|-------|
|            | Lower               | Upper |
| weekday(1) | ,873                | 1,804 |
| weekday(2) | ,677                | 1,453 |
| weekday(3) | ,750                | 1,586 |
| weekday(4) | ,891                | 1,849 |
| weekday(5) | ,640                | 1,404 |
| weekday(6) | ,433                | 1,015 |
| holiday(1) | ,299                | 1,290 |
| season     |                     |       |
| season(1)  | ,590                | 1,115 |
| season(2)  | ,678                | 1,204 |
| season(3)  | ,797                | 1,438 |
| season(4)  | ,429                | ,870  |
| Constant   |                     |       |

a. Variable(s) entered on step 1: sv5, VASTY2, weekday, holiday, season.

```
LOGISTIC REGRESSION VARIABLES seurauslt3
/METHOD=ENTER sv7 VASTY2 weekday holiday season
/CONTRAST (sv7)=Indicator(1)
/CONTRAST (VASTY2)=Indicator(1)
/CONTRAST (weekday)=Indicator(1)
/CONTRAST (holiday)=Indicator(1)
/CONTRAST (season)=Indicator(1)
/PRINT=CI(95)
/CRITERIA=PIN(0.05) POUT(0.10) ITERATE(20) CUT(0.5).
```

## Logistic Regression

[DataSet6] C:\cWordjan\Rafaela\_VCS\alla\_tillsammans\abo\_bjo\_vasa\_v1.sav

### Case Processing Summary

| Unweighted Cases <sup>a</sup> |                      | N     | Percent |
|-------------------------------|----------------------|-------|---------|
| Selected Cases                | Included in Analysis | 12475 | 100,0   |
|                               | Missing Cases        | 0     | ,0      |
|                               | Total                | 12475 | 100,0   |
| Unselected Cases              |                      | 0     | ,0      |
| Total                         |                      | 12475 | 100,0   |

a. If weight is in effect, see classification table for the total number of cases.

### Dependent Variable Encoding

| Original Value                    | Internal Value |
|-----------------------------------|----------------|
| 0 ingen händelse eller ei haittaa | 0              |
| 1 haitta (i någon form)           | 1              |

### Categorical Variables Codings

|                                     | Frequency | Parameter |
|-------------------------------------|-----------|-----------|
|                                     |           | (1)       |
| VASTY2 (SAIR*10000)+VASTY 403073101 | 365       | ,000      |
| 403073102                           | 362       | 1,000     |
| 403073103                           | 365       | ,000      |
| 403073202                           | 365       | ,000      |
| 403073203                           | 365       | ,000      |
| 403073204                           | 330       | ,000      |
| 403073303                           | 364       | ,000      |
| 403073651                           | 362       | ,000      |
| 403073771                           | 365       | ,000      |
| 403133102                           | 341       | ,000      |
| 403133106                           | 365       | ,000      |
| 403133107                           | 365       | ,000      |
| 403133109                           | 365       | ,000      |
| 403133202                           | 365       | ,000      |
| 403133203                           | 365       | ,000      |
| 403133204                           | 365       | ,000      |
| 403133315                           | 177       | ,000      |
| 403133322                           | 365       | ,000      |
| 403133401                           | 362       | ,000      |
| 403133402                           | 365       | ,000      |
| 403133550                           | 298       | ,000      |
| 403133772                           | 365       | ,000      |
| 403135803                           | 365       | ,000      |

**Categorical Variables Codings**

|                           |           | Parameter coding |       |
|---------------------------|-----------|------------------|-------|
|                           |           | (2)              | (3)   |
| VASTY2 (SAIR*10000)+VASTY | 403073101 | ,000             | ,000  |
|                           | 403073102 | ,000             | ,000  |
|                           | 403073103 | 1,000            | ,000  |
|                           | 403073202 | ,000             | 1,000 |
|                           | 403073203 | ,000             | ,000  |
|                           | 403073204 | ,000             | ,000  |
|                           | 403073303 | ,000             | ,000  |
|                           | 403073651 | ,000             | ,000  |
|                           | 403073771 | ,000             | ,000  |
|                           | 403133102 | ,000             | ,000  |
|                           | 403133106 | ,000             | ,000  |
|                           | 403133107 | ,000             | ,000  |
|                           | 403133109 | ,000             | ,000  |
|                           | 403133202 | ,000             | ,000  |
|                           | 403133203 | ,000             | ,000  |
|                           | 403133204 | ,000             | ,000  |
|                           | 403133315 | ,000             | ,000  |
|                           | 403133322 | ,000             | ,000  |
|                           | 403133401 | ,000             | ,000  |
|                           | 403133402 | ,000             | ,000  |
|                           | 403133550 | ,000             | ,000  |
|                           | 403133772 | ,000             | ,000  |
|                           | 403135803 | ,000             | ,000  |

Peer Review Only

## Categorical Variables Codings

|                           |           | Parameter coding |       |
|---------------------------|-----------|------------------|-------|
|                           |           | (4)              | (5)   |
| VASTY2 (SAIR*10000)+VASTY | 403073101 | ,000             | ,000  |
|                           | 403073102 | ,000             | ,000  |
|                           | 403073103 | ,000             | ,000  |
|                           | 403073202 | ,000             | ,000  |
|                           | 403073203 | 1,000            | ,000  |
|                           | 403073204 | ,000             | 1,000 |
|                           | 403073303 | ,000             | ,000  |
|                           | 403073651 | ,000             | ,000  |
|                           | 403073771 | ,000             | ,000  |
|                           | 403133102 | ,000             | ,000  |
|                           | 403133106 | ,000             | ,000  |
|                           | 403133107 | ,000             | ,000  |
|                           | 403133109 | ,000             | ,000  |
|                           | 403133202 | ,000             | ,000  |
|                           | 403133203 | ,000             | ,000  |
|                           | 403133204 | ,000             | ,000  |
|                           | 403133315 | ,000             | ,000  |
|                           | 403133322 | ,000             | ,000  |
|                           | 403133401 | ,000             | ,000  |
|                           | 403133402 | ,000             | ,000  |
|                           | 403133550 | ,000             | ,000  |
|                           | 403133772 | ,000             | ,000  |
|                           | 403135803 | ,000             | ,000  |



**Categorical Variables Codings**

|                           |           | Parameter coding |       |
|---------------------------|-----------|------------------|-------|
|                           |           | (6)              | (7)   |
| VASTY2 (SAIR*10000)+VASTY | 403073101 | ,000             | ,000  |
|                           | 403073102 | ,000             | ,000  |
|                           | 403073103 | ,000             | ,000  |
|                           | 403073202 | ,000             | ,000  |
|                           | 403073203 | ,000             | ,000  |
|                           | 403073204 | ,000             | ,000  |
|                           | 403073303 | 1,000            | ,000  |
|                           | 403073651 | ,000             | 1,000 |
|                           | 403073771 | ,000             | ,000  |
|                           | 403133102 | ,000             | ,000  |
|                           | 403133106 | ,000             | ,000  |
|                           | 403133107 | ,000             | ,000  |
|                           | 403133109 | ,000             | ,000  |
|                           | 403133202 | ,000             | ,000  |
|                           | 403133203 | ,000             | ,000  |
|                           | 403133204 | ,000             | ,000  |
|                           | 403133315 | ,000             | ,000  |
|                           | 403133322 | ,000             | ,000  |
|                           | 403133401 | ,000             | ,000  |
|                           | 403133402 | ,000             | ,000  |
|                           | 403133550 | ,000             | ,000  |
|                           | 403133772 | ,000             | ,000  |
|                           | 403135803 | ,000             | ,000  |

Peer Review Only

## Categorical Variables Codings

|                           |           | Parameter coding |       |
|---------------------------|-----------|------------------|-------|
|                           |           | (8)              | (9)   |
| VASTY2 (SAIR*10000)+VASTY | 403073101 | ,000             | ,000  |
|                           | 403073102 | ,000             | ,000  |
|                           | 403073103 | ,000             | ,000  |
|                           | 403073202 | ,000             | ,000  |
|                           | 403073203 | ,000             | ,000  |
|                           | 403073204 | ,000             | ,000  |
|                           | 403073303 | ,000             | ,000  |
|                           | 403073651 | ,000             | ,000  |
|                           | 403073771 | 1,000            | ,000  |
|                           | 403133102 | ,000             | 1,000 |
|                           | 403133106 | ,000             | ,000  |
|                           | 403133107 | ,000             | ,000  |
|                           | 403133109 | ,000             | ,000  |
|                           | 403133202 | ,000             | ,000  |
|                           | 403133203 | ,000             | ,000  |
|                           | 403133204 | ,000             | ,000  |
|                           | 403133315 | ,000             | ,000  |
|                           | 403133322 | ,000             | ,000  |
|                           | 403133401 | ,000             | ,000  |
|                           | 403133402 | ,000             | ,000  |
|                           | 403133550 | ,000             | ,000  |
|                           | 403133772 | ,000             | ,000  |
|                           | 403135803 | ,000             | ,000  |

**Categorical Variables Codings**

|                           |           | Parameter coding |       |
|---------------------------|-----------|------------------|-------|
|                           |           | (10)             | (11)  |
| VASTY2 (SAIR*10000)+VASTY | 403073101 | ,000             | ,000  |
|                           | 403073102 | ,000             | ,000  |
|                           | 403073103 | ,000             | ,000  |
|                           | 403073202 | ,000             | ,000  |
|                           | 403073203 | ,000             | ,000  |
|                           | 403073204 | ,000             | ,000  |
|                           | 403073303 | ,000             | ,000  |
|                           | 403073651 | ,000             | ,000  |
|                           | 403073771 | ,000             | ,000  |
|                           | 403133102 | ,000             | ,000  |
|                           | 403133106 | 1,000            | ,000  |
|                           | 403133107 | ,000             | 1,000 |
|                           | 403133109 | ,000             | ,000  |
|                           | 403133202 | ,000             | ,000  |
|                           | 403133203 | ,000             | ,000  |
|                           | 403133204 | ,000             | ,000  |
|                           | 403133315 | ,000             | ,000  |
|                           | 403133322 | ,000             | ,000  |
|                           | 403133401 | ,000             | ,000  |
|                           | 403133402 | ,000             | ,000  |
|                           | 403133550 | ,000             | ,000  |
|                           | 403133772 | ,000             | ,000  |
|                           | 403135803 | ,000             | ,000  |

Peer Review Only

## Categorical Variables Codings

|                           |           | Parameter coding |       |
|---------------------------|-----------|------------------|-------|
|                           |           | (12)             | (13)  |
| VASTY2 (SAIR*10000)+VASTY | 403073101 | ,000             | ,000  |
|                           | 403073102 | ,000             | ,000  |
|                           | 403073103 | ,000             | ,000  |
|                           | 403073202 | ,000             | ,000  |
|                           | 403073203 | ,000             | ,000  |
|                           | 403073204 | ,000             | ,000  |
|                           | 403073303 | ,000             | ,000  |
|                           | 403073651 | ,000             | ,000  |
|                           | 403073771 | ,000             | ,000  |
|                           | 403133102 | ,000             | ,000  |
|                           | 403133106 | ,000             | ,000  |
|                           | 403133107 | ,000             | ,000  |
|                           | 403133109 | 1,000            | ,000  |
|                           | 403133202 | ,000             | 1,000 |
|                           | 403133203 | ,000             | ,000  |
|                           | 403133204 | ,000             | ,000  |
|                           | 403133315 | ,000             | ,000  |
|                           | 403133322 | ,000             | ,000  |
|                           | 403133401 | ,000             | ,000  |
|                           | 403133402 | ,000             | ,000  |
|                           | 403133550 | ,000             | ,000  |
|                           | 403133772 | ,000             | ,000  |
|                           | 403135803 | ,000             | ,000  |

**Categorical Variables Codings**

|                           |           | Parameter coding |       |
|---------------------------|-----------|------------------|-------|
|                           |           | (14)             | (15)  |
| VASTY2 (SAIR*10000)+VASTY | 403073101 | ,000             | ,000  |
|                           | 403073102 | ,000             | ,000  |
|                           | 403073103 | ,000             | ,000  |
|                           | 403073202 | ,000             | ,000  |
|                           | 403073203 | ,000             | ,000  |
|                           | 403073204 | ,000             | ,000  |
|                           | 403073303 | ,000             | ,000  |
|                           | 403073651 | ,000             | ,000  |
|                           | 403073771 | ,000             | ,000  |
|                           | 403133102 | ,000             | ,000  |
|                           | 403133106 | ,000             | ,000  |
|                           | 403133107 | ,000             | ,000  |
|                           | 403133109 | ,000             | ,000  |
|                           | 403133202 | ,000             | ,000  |
|                           | 403133203 | 1,000            | ,000  |
|                           | 403133204 | ,000             | 1,000 |
|                           | 403133315 | ,000             | ,000  |
|                           | 403133322 | ,000             | ,000  |
|                           | 403133401 | ,000             | ,000  |
|                           | 403133402 | ,000             | ,000  |
|                           | 403133550 | ,000             | ,000  |
|                           | 403133772 | ,000             | ,000  |
|                           | 403135803 | ,000             | ,000  |

Peer Review Only

## Categorical Variables Codings

|                           |           | Parameter coding |       |
|---------------------------|-----------|------------------|-------|
|                           |           | (16)             | (17)  |
| VASTY2 (SAIR*10000)+VASTY | 403073101 | ,000             | ,000  |
|                           | 403073102 | ,000             | ,000  |
|                           | 403073103 | ,000             | ,000  |
|                           | 403073202 | ,000             | ,000  |
|                           | 403073203 | ,000             | ,000  |
|                           | 403073204 | ,000             | ,000  |
|                           | 403073303 | ,000             | ,000  |
|                           | 403073651 | ,000             | ,000  |
|                           | 403073771 | ,000             | ,000  |
|                           | 403133102 | ,000             | ,000  |
|                           | 403133106 | ,000             | ,000  |
|                           | 403133107 | ,000             | ,000  |
|                           | 403133109 | ,000             | ,000  |
|                           | 403133202 | ,000             | ,000  |
|                           | 403133203 | ,000             | ,000  |
|                           | 403133204 | ,000             | ,000  |
|                           | 403133315 | 1,000            | ,000  |
|                           | 403133322 | ,000             | 1,000 |
|                           | 403133401 | ,000             | ,000  |
|                           | 403133402 | ,000             | ,000  |
|                           | 403133550 | ,000             | ,000  |
|                           | 403133772 | ,000             | ,000  |
|                           | 403135803 | ,000             | ,000  |

## Categorical Variables Codings

|                           |           | Parameter coding |       |
|---------------------------|-----------|------------------|-------|
|                           |           | (18)             | (19)  |
| VASTY2 (SAIR*10000)+VASTY | 403073101 | ,000             | ,000  |
|                           | 403073102 | ,000             | ,000  |
|                           | 403073103 | ,000             | ,000  |
|                           | 403073202 | ,000             | ,000  |
|                           | 403073203 | ,000             | ,000  |
|                           | 403073204 | ,000             | ,000  |
|                           | 403073303 | ,000             | ,000  |
|                           | 403073651 | ,000             | ,000  |
|                           | 403073771 | ,000             | ,000  |
|                           | 403133102 | ,000             | ,000  |
|                           | 403133106 | ,000             | ,000  |
|                           | 403133107 | ,000             | ,000  |
|                           | 403133109 | ,000             | ,000  |
|                           | 403133202 | ,000             | ,000  |
|                           | 403133203 | ,000             | ,000  |
|                           | 403133204 | ,000             | ,000  |
|                           | 403133315 | ,000             | ,000  |
|                           | 403133322 | ,000             | ,000  |
|                           | 403133401 | 1,000            | ,000  |
|                           | 403133402 | ,000             | 1,000 |
|                           | 403133550 | ,000             | ,000  |
|                           | 403133772 | ,000             | ,000  |
|                           | 403135803 | ,000             | ,000  |

## Categorical Variables Codings

|                           |           | Parameter coding |       |
|---------------------------|-----------|------------------|-------|
|                           |           | (20)             | (21)  |
| VASTY2 (SAIR*10000)+VASTY | 403073101 | ,000             | ,000  |
|                           | 403073102 | ,000             | ,000  |
|                           | 403073103 | ,000             | ,000  |
|                           | 403073202 | ,000             | ,000  |
|                           | 403073203 | ,000             | ,000  |
|                           | 403073204 | ,000             | ,000  |
|                           | 403073303 | ,000             | ,000  |
|                           | 403073651 | ,000             | ,000  |
|                           | 403073771 | ,000             | ,000  |
|                           | 403133102 | ,000             | ,000  |
|                           | 403133106 | ,000             | ,000  |
|                           | 403133107 | ,000             | ,000  |
|                           | 403133109 | ,000             | ,000  |
|                           | 403133202 | ,000             | ,000  |
|                           | 403133203 | ,000             | ,000  |
|                           | 403133204 | ,000             | ,000  |
|                           | 403133315 | ,000             | ,000  |
|                           | 403133322 | ,000             | ,000  |
|                           | 403133401 | ,000             | ,000  |
|                           | 403133402 | ,000             | ,000  |
|                           | 403133550 | 1,000            | ,000  |
|                           | 403133772 | ,000             | 1,000 |
|                           | 403135803 | ,000             | ,000  |



1  
2  
3  
4  
5  
6  
7  
8  
9  
10  
11  
12  
13  
14  
15  
16  
17  
18  
19  
20  
21  
22  
23  
24  
25  
26  
27  
28  
29  
30  
31  
32  
33  
34  
35  
36  
37  
38  
39  
40  
41  
42  
43  
44  
45  
46  
47  
48  
49  
50  
51  
52  
53  
54  
55  
56  
57  
58  
59  
60

**Categorical Variables Codings**

|                           |           | Parameter coding |      |
|---------------------------|-----------|------------------|------|
|                           |           | (22)             | (23) |
| VASTY2 (SAIR*10000)+VASTY | 403073101 | ,000             | ,000 |
|                           | 403073102 | ,000             | ,000 |
|                           | 403073103 | ,000             | ,000 |
|                           | 403073202 | ,000             | ,000 |
|                           | 403073203 | ,000             | ,000 |
|                           | 403073204 | ,000             | ,000 |
|                           | 403073303 | ,000             | ,000 |
|                           | 403073651 | ,000             | ,000 |
|                           | 403073771 | ,000             | ,000 |
|                           | 403133102 | ,000             | ,000 |
|                           | 403133106 | ,000             | ,000 |
|                           | 403133107 | ,000             | ,000 |
|                           | 403133109 | ,000             | ,000 |
|                           | 403133202 | ,000             | ,000 |
|                           | 403133203 | ,000             | ,000 |
|                           | 403133204 | ,000             | ,000 |
|                           | 403133315 | ,000             | ,000 |
|                           | 403133322 | ,000             | ,000 |
|                           | 403133401 | ,000             | ,000 |
|                           | 403133402 | ,000             | ,000 |
|                           | 403133550 | ,000             | ,000 |
|                           | 403133772 | ,000             | ,000 |
|                           | 403135803 | 1,000            | ,000 |

Peer Review Only

## Categorical Variables Codings

|                           |           | Parameter coding |      |
|---------------------------|-----------|------------------|------|
|                           |           | (24)             | (25) |
| VASTY2 (SAIR*10000)+VASTY | 403073101 | ,000             | ,000 |
|                           | 403073102 | ,000             | ,000 |
|                           | 403073103 | ,000             | ,000 |
|                           | 403073202 | ,000             | ,000 |
|                           | 403073203 | ,000             | ,000 |
|                           | 403073204 | ,000             | ,000 |
|                           | 403073303 | ,000             | ,000 |
|                           | 403073651 | ,000             | ,000 |
|                           | 403073771 | ,000             | ,000 |
|                           | 403133102 | ,000             | ,000 |
|                           | 403133106 | ,000             | ,000 |
|                           | 403133107 | ,000             | ,000 |
|                           | 403133109 | ,000             | ,000 |
|                           | 403133202 | ,000             | ,000 |
|                           | 403133203 | ,000             | ,000 |
|                           | 403133204 | ,000             | ,000 |
|                           | 403133315 | ,000             | ,000 |
|                           | 403133322 | ,000             | ,000 |
|                           | 403133401 | ,000             | ,000 |
|                           | 403133402 | ,000             | ,000 |
|                           | 403133550 | ,000             | ,000 |
|                           | 403133772 | ,000             | ,000 |
|                           | 403135803 | ,000             | ,000 |

**Categorical Variables Codings**

|                           |           | Parameter coding |      |
|---------------------------|-----------|------------------|------|
|                           |           | (26)             | (27) |
| VASTY2 (SAIR*10000)+VASTY | 403073101 | ,000             | ,000 |
|                           | 403073102 | ,000             | ,000 |
|                           | 403073103 | ,000             | ,000 |
|                           | 403073202 | ,000             | ,000 |
|                           | 403073203 | ,000             | ,000 |
|                           | 403073204 | ,000             | ,000 |
|                           | 403073303 | ,000             | ,000 |
|                           | 403073651 | ,000             | ,000 |
|                           | 403073771 | ,000             | ,000 |
|                           | 403133102 | ,000             | ,000 |
|                           | 403133106 | ,000             | ,000 |
|                           | 403133107 | ,000             | ,000 |
|                           | 403133109 | ,000             | ,000 |
|                           | 403133202 | ,000             | ,000 |
|                           | 403133203 | ,000             | ,000 |
|                           | 403133204 | ,000             | ,000 |
|                           | 403133315 | ,000             | ,000 |
|                           | 403133322 | ,000             | ,000 |
|                           | 403133401 | ,000             | ,000 |
|                           | 403133402 | ,000             | ,000 |
|                           | 403133550 | ,000             | ,000 |
|                           | 403133772 | ,000             | ,000 |
|                           | 403135803 | ,000             | ,000 |

Peer review only

## Categorical Variables Codings

|                           |           | Parameter coding |      |
|---------------------------|-----------|------------------|------|
|                           |           | (28)             | (29) |
| VASTY2 (SAIR*10000)+VASTY | 403073101 | ,000             | ,000 |
|                           | 403073102 | ,000             | ,000 |
|                           | 403073103 | ,000             | ,000 |
|                           | 403073202 | ,000             | ,000 |
|                           | 403073203 | ,000             | ,000 |
|                           | 403073204 | ,000             | ,000 |
|                           | 403073303 | ,000             | ,000 |
|                           | 403073651 | ,000             | ,000 |
|                           | 403073771 | ,000             | ,000 |
|                           | 403133102 | ,000             | ,000 |
|                           | 403133106 | ,000             | ,000 |
|                           | 403133107 | ,000             | ,000 |
|                           | 403133109 | ,000             | ,000 |
|                           | 403133202 | ,000             | ,000 |
|                           | 403133203 | ,000             | ,000 |
|                           | 403133204 | ,000             | ,000 |
|                           | 403133315 | ,000             | ,000 |
|                           | 403133322 | ,000             | ,000 |
|                           | 403133401 | ,000             | ,000 |
|                           | 403133402 | ,000             | ,000 |
|                           | 403133550 | ,000             | ,000 |
|                           | 403133772 | ,000             | ,000 |
|                           | 403135803 | ,000             | ,000 |

## Categorical Variables Codings

|                           |           | Parameter coding |      |
|---------------------------|-----------|------------------|------|
|                           |           | (30)             | (31) |
| VASTY2 (SAIR*10000)+VASTY | 403073101 | ,000             | ,000 |
|                           | 403073102 | ,000             | ,000 |
|                           | 403073103 | ,000             | ,000 |
|                           | 403073202 | ,000             | ,000 |
|                           | 403073203 | ,000             | ,000 |
|                           | 403073204 | ,000             | ,000 |
|                           | 403073303 | ,000             | ,000 |
|                           | 403073651 | ,000             | ,000 |
|                           | 403073771 | ,000             | ,000 |
|                           | 403133102 | ,000             | ,000 |
|                           | 403133106 | ,000             | ,000 |
|                           | 403133107 | ,000             | ,000 |
|                           | 403133109 | ,000             | ,000 |
|                           | 403133202 | ,000             | ,000 |
|                           | 403133203 | ,000             | ,000 |
|                           | 403133204 | ,000             | ,000 |
|                           | 403133315 | ,000             | ,000 |
|                           | 403133322 | ,000             | ,000 |
|                           | 403133401 | ,000             | ,000 |
|                           | 403133402 | ,000             | ,000 |
|                           | 403133550 | ,000             | ,000 |
|                           | 403133772 | ,000             | ,000 |
|                           | 403135803 | ,000             | ,000 |

## Categorical Variables Codings

|                           |           | Parameter coding |      |
|---------------------------|-----------|------------------|------|
|                           |           | (32)             | (33) |
| VASTY2 (SAIR*10000)+VASTY | 403073101 | ,000             | ,000 |
|                           | 403073102 | ,000             | ,000 |
|                           | 403073103 | ,000             | ,000 |
|                           | 403073202 | ,000             | ,000 |
|                           | 403073203 | ,000             | ,000 |
|                           | 403073204 | ,000             | ,000 |
|                           | 403073303 | ,000             | ,000 |
|                           | 403073651 | ,000             | ,000 |
|                           | 403073771 | ,000             | ,000 |
|                           | 403133102 | ,000             | ,000 |
|                           | 403133106 | ,000             | ,000 |
|                           | 403133107 | ,000             | ,000 |
|                           | 403133109 | ,000             | ,000 |
|                           | 403133202 | ,000             | ,000 |
|                           | 403133203 | ,000             | ,000 |
|                           | 403133204 | ,000             | ,000 |
|                           | 403133315 | ,000             | ,000 |
|                           | 403133322 | ,000             | ,000 |
|                           | 403133401 | ,000             | ,000 |
|                           | 403133402 | ,000             | ,000 |
|                           | 403133550 | ,000             | ,000 |
|                           | 403133772 | ,000             | ,000 |
|                           | 403135803 | ,000             | ,000 |

**Categorical Variables Codings**

|                           |           | Parameter coding |      |
|---------------------------|-----------|------------------|------|
|                           |           | (34)             | (35) |
| VASTY2 (SAIR*10000)+VASTY | 403073101 | ,000             | ,000 |
|                           | 403073102 | ,000             | ,000 |
|                           | 403073103 | ,000             | ,000 |
|                           | 403073202 | ,000             | ,000 |
|                           | 403073203 | ,000             | ,000 |
|                           | 403073204 | ,000             | ,000 |
|                           | 403073303 | ,000             | ,000 |
|                           | 403073651 | ,000             | ,000 |
|                           | 403073771 | ,000             | ,000 |
|                           | 403133102 | ,000             | ,000 |
|                           | 403133106 | ,000             | ,000 |
|                           | 403133107 | ,000             | ,000 |
|                           | 403133109 | ,000             | ,000 |
|                           | 403133202 | ,000             | ,000 |
|                           | 403133203 | ,000             | ,000 |
|                           | 403133204 | ,000             | ,000 |
|                           | 403133315 | ,000             | ,000 |
|                           | 403133322 | ,000             | ,000 |
|                           | 403133401 | ,000             | ,000 |
|                           | 403133402 | ,000             | ,000 |
|                           | 403133550 | ,000             | ,000 |
|                           | 403133772 | ,000             | ,000 |
|                           | 403135803 | ,000             | ,000 |

Peer Review Only

## Categorical Variables Codings

|                              |                                         | Frequency | Parameter<br>(1) |
|------------------------------|-----------------------------------------|-----------|------------------|
|                              | 404060001                               | 365       | ,000             |
|                              | 404060002                               | 366       | ,000             |
|                              | 404310003                               | 291       | ,000             |
|                              | 404310004                               | 291       | ,000             |
|                              | 502300005                               | 366       | ,000             |
|                              | 502300006                               | 225       | ,000             |
|                              | 502300007                               | 366       | ,000             |
|                              | 502300214                               | 366       | ,000             |
|                              | 502300411                               | 366       | ,000             |
|                              | 502300415                               | 360       | ,000             |
|                              | 502300416                               | 363       | ,000             |
|                              | 502300811                               | 364       | ,000             |
|                              | 502300913                               | 315       | ,000             |
| weekday veckodag             | 1 måndag                                | 1805      | ,000             |
|                              | 2 tisdag                                | 1812      | 1,000            |
|                              | 3 onsdag                                | 1800      | ,000             |
|                              | 4 torsdag                               | 1794      | ,000             |
|                              | 5 fredag                                | 1788      | ,000             |
|                              | 6 lördag                                | 1735      | ,000             |
|                              | 7 söndag                                | 1741      | ,000             |
| sv7 sjättedelar för standard | 1 fjärde sjundedelen                    | 1423      | ,000             |
|                              | 2 första sjundedelen                    | 3031      | 1,000            |
|                              | 3 andra sjundedelen                     | 1238      | ,000             |
|                              | 4 tredje sjundedelen                    | 1255      | ,000             |
|                              | 5 femte sjundedelen                     | 1445      | ,000             |
|                              | 6 sjätte sjundedelen                    | 1948      | ,000             |
|                              | 7 sjunde sjundedelen                    | 2135      | ,000             |
| season säsong/period         | 1 januari-mars                          | 3182      | ,000             |
|                              | 2 april-maj                             | 2127      | 1,000            |
|                              | 3 juni-augusti                          | 2911      | ,000             |
|                              | 4 september-oktober                     | 2144      | ,000             |
|                              | 5 november-december                     | 2111      | ,000             |
| holiday större helg          | 1 ingen större helg                     | 12078     | ,000             |
|                              | 2 större helg (påsk/midsommar/julonyår) | 397       | 1,000            |



## Categorical Variables Codings

|                              |                                         | Parameter coding |       |
|------------------------------|-----------------------------------------|------------------|-------|
|                              |                                         | (2)              | (3)   |
|                              | 404060001                               | ,000             | ,000  |
|                              | 404060002                               | ,000             | ,000  |
|                              | 404310003                               | ,000             | ,000  |
|                              | 404310004                               | ,000             | ,000  |
|                              | 502300005                               | ,000             | ,000  |
|                              | 502300006                               | ,000             | ,000  |
|                              | 502300007                               | ,000             | ,000  |
|                              | 502300214                               | ,000             | ,000  |
|                              | 502300411                               | ,000             | ,000  |
|                              | 502300415                               | ,000             | ,000  |
|                              | 502300416                               | ,000             | ,000  |
|                              | 502300811                               | ,000             | ,000  |
|                              | 502300913                               | ,000             | ,000  |
| weekday veckodag             | 1 måndag                                | ,000             | ,000  |
|                              | 2 tisdag                                | ,000             | ,000  |
|                              | 3 onsdag                                | 1,000            | ,000  |
|                              | 4 torsdag                               | ,000             | 1,000 |
|                              | 5 fredag                                | ,000             | ,000  |
|                              | 6 lördag                                | ,000             | ,000  |
|                              | 7 söndag                                | ,000             | ,000  |
| sv7 sjättedelar för standard | 1 fjärde sjundedelen                    | ,000             | ,000  |
|                              | 2 första sjundedelen                    | ,000             | ,000  |
|                              | 3 andra sjundedelen                     | 1,000            | ,000  |
|                              | 4 tredje sjundedelen                    | ,000             | 1,000 |
|                              | 5 femte sjundedelen                     | ,000             | ,000  |
|                              | 6 sjätte sjundedelen                    | ,000             | ,000  |
|                              | 7 sjunde sjundedelen                    | ,000             | ,000  |
| season säsong/period         | 1 januari-mars                          | ,000             | ,000  |
|                              | 2 april-maj                             | ,000             | ,000  |
|                              | 3 juni-augusti                          | 1,000            | ,000  |
|                              | 4 september-oktober                     | ,000             | 1,000 |
|                              | 5 november-december                     | ,000             | ,000  |
| holiday större helg          | 1 ingen större helg                     |                  |       |
|                              | 2 större helg (påsk/midsommar/julonyår) |                  |       |

## Categorical Variables Codings

|                              |                                         | Parameter coding |       |
|------------------------------|-----------------------------------------|------------------|-------|
|                              |                                         | (4)              | (5)   |
|                              | 404060001                               | ,000             | ,000  |
|                              | 404060002                               | ,000             | ,000  |
|                              | 404310003                               | ,000             | ,000  |
|                              | 404310004                               | ,000             | ,000  |
|                              | 502300005                               | ,000             | ,000  |
|                              | 502300006                               | ,000             | ,000  |
|                              | 502300007                               | ,000             | ,000  |
|                              | 502300214                               | ,000             | ,000  |
|                              | 502300411                               | ,000             | ,000  |
|                              | 502300415                               | ,000             | ,000  |
|                              | 502300416                               | ,000             | ,000  |
|                              | 502300811                               | ,000             | ,000  |
|                              | 502300913                               | ,000             | ,000  |
| weekday veckodag             | 1 måndag                                | ,000             | ,000  |
|                              | 2 tisdag                                | ,000             | ,000  |
|                              | 3 onsdag                                | ,000             | ,000  |
|                              | 4 torsdag                               | ,000             | ,000  |
|                              | 5 fredag                                | 1,000            | ,000  |
|                              | 6 lördag                                | ,000             | 1,000 |
|                              | 7 söndag                                | ,000             | ,000  |
| sv7 sjättedelar för standard | 1 fjärde sjundedelen                    | ,000             | ,000  |
|                              | 2 första sjundedelen                    | ,000             | ,000  |
|                              | 3 andra sjundedelen                     | ,000             | ,000  |
|                              | 4 tredje sjundedelen                    | ,000             | ,000  |
|                              | 5 femte sjundedelen                     | 1,000            | ,000  |
|                              | 6 sjätte sjundedelen                    | ,000             | 1,000 |
|                              | 7 sjunde sjundedelen                    | ,000             | ,000  |
| season säsong/period         | 1 januari-mars                          | ,000             |       |
|                              | 2 april-maj                             | ,000             |       |
|                              | 3 juni-augusti                          | ,000             |       |
|                              | 4 september-oktober                     | ,000             |       |
|                              | 5 november-december                     | 1,000            |       |
| holiday större helg          | 1 ingen större helg                     |                  |       |
|                              | 2 större helg (påsk/midsommar/julonyår) |                  |       |

## Categorical Variables Codings

|                              |                                         | Parameter coding |      |
|------------------------------|-----------------------------------------|------------------|------|
|                              |                                         | (6)              | (7)  |
|                              | 404060001                               | ,000             | ,000 |
|                              | 404060002                               | ,000             | ,000 |
|                              | 404310003                               | ,000             | ,000 |
|                              | 404310004                               | ,000             | ,000 |
|                              | 502300005                               | ,000             | ,000 |
|                              | 502300006                               | ,000             | ,000 |
|                              | 502300007                               | ,000             | ,000 |
|                              | 502300214                               | ,000             | ,000 |
|                              | 502300411                               | ,000             | ,000 |
|                              | 502300415                               | ,000             | ,000 |
|                              | 502300416                               | ,000             | ,000 |
|                              | 502300811                               | ,000             | ,000 |
|                              | 502300913                               | ,000             | ,000 |
| weekday veckodag             | 1 måndag                                | ,000             |      |
|                              | 2 tisdag                                | ,000             |      |
|                              | 3 onsdag                                | ,000             |      |
|                              | 4 torsdag                               | ,000             |      |
|                              | 5 fredag                                | ,000             |      |
|                              | 6 lördag                                | ,000             |      |
|                              | 7 söndag                                | 1,000            |      |
| sv7 sjättedelar för standard | 1 fjärde sjundedelen                    | ,000             |      |
|                              | 2 första sjundedelen                    | ,000             |      |
|                              | 3 andra sjundedelen                     | ,000             |      |
|                              | 4 tredje sjundedelen                    | ,000             |      |
|                              | 5 femte sjundedelen                     | ,000             |      |
|                              | 6 sjätte sjundedelen                    | ,000             |      |
|                              | 7 sjunde sjundedelen                    | 1,000            |      |
| season säsong/period         | 1 januari-mars                          |                  |      |
|                              | 2 april-maj                             |                  |      |
|                              | 3 juni-augusti                          |                  |      |
|                              | 4 september-oktober                     |                  |      |
|                              | 5 november-december                     |                  |      |
| holiday större helg          | 1 ingen större helg                     |                  |      |
|                              | 2 större helg (påsk/midsommar/julonyår) |                  |      |

## Categorical Variables Codings

|                              |                                         | Parameter coding |      |
|------------------------------|-----------------------------------------|------------------|------|
|                              |                                         | (8)              | (9)  |
|                              | 404060001                               | ,000             | ,000 |
|                              | 404060002                               | ,000             | ,000 |
|                              | 404310003                               | ,000             | ,000 |
|                              | 404310004                               | ,000             | ,000 |
|                              | 502300005                               | ,000             | ,000 |
|                              | 502300006                               | ,000             | ,000 |
|                              | 502300007                               | ,000             | ,000 |
|                              | 502300214                               | ,000             | ,000 |
|                              | 502300411                               | ,000             | ,000 |
|                              | 502300415                               | ,000             | ,000 |
|                              | 502300416                               | ,000             | ,000 |
|                              | 502300811                               | ,000             | ,000 |
|                              | 502300913                               | ,000             | ,000 |
| weekday veckodag             | 1 måndag                                |                  |      |
|                              | 2 tisdag                                |                  |      |
|                              | 3 onsdag                                |                  |      |
|                              | 4 torsdag                               |                  |      |
|                              | 5 fredag                                |                  |      |
|                              | 6 lördag                                |                  |      |
|                              | 7 söndag                                |                  |      |
| sv7 sjättedelar för standard | 1 fjärde sjundedelen                    |                  |      |
|                              | 2 första sjundedelen                    |                  |      |
|                              | 3 andra sjundedelen                     |                  |      |
|                              | 4 tredje sjundedelen                    |                  |      |
|                              | 5 femte sjundedelen                     |                  |      |
|                              | 6 sjätte sjundedelen                    |                  |      |
|                              | 7 sjunde sjundedelen                    |                  |      |
| season säsong/period         | 1 januari-mars                          |                  |      |
|                              | 2 april-maj                             |                  |      |
|                              | 3 juni-augusti                          |                  |      |
|                              | 4 september-oktober                     |                  |      |
|                              | 5 november-december                     |                  |      |
| holiday större helg          | 1 ingen större helg                     |                  |      |
|                              | 2 större helg (påsk/midsommar/julonyår) |                  |      |

## Categorical Variables Codings

|                              |                                         | Parameter coding |      |
|------------------------------|-----------------------------------------|------------------|------|
|                              |                                         | (10)             | (11) |
|                              | 404060001                               | ,000             | ,000 |
|                              | 404060002                               | ,000             | ,000 |
|                              | 404310003                               | ,000             | ,000 |
|                              | 404310004                               | ,000             | ,000 |
|                              | 502300005                               | ,000             | ,000 |
|                              | 502300006                               | ,000             | ,000 |
|                              | 502300007                               | ,000             | ,000 |
|                              | 502300214                               | ,000             | ,000 |
|                              | 502300411                               | ,000             | ,000 |
|                              | 502300415                               | ,000             | ,000 |
|                              | 502300416                               | ,000             | ,000 |
|                              | 502300811                               | ,000             | ,000 |
|                              | 502300913                               | ,000             | ,000 |
| weekday veckodag             | 1 måndag                                |                  |      |
|                              | 2 tisdag                                |                  |      |
|                              | 3 onsdag                                |                  |      |
|                              | 4 torsdag                               |                  |      |
|                              | 5 fredag                                |                  |      |
|                              | 6 lördag                                |                  |      |
|                              | 7 söndag                                |                  |      |
| sv7 sjättedelar för standard | 1 fjärde sjundedelen                    |                  |      |
|                              | 2 första sjundedelen                    |                  |      |
|                              | 3 andra sjundedelen                     |                  |      |
|                              | 4 tredje sjundedelen                    |                  |      |
|                              | 5 femte sjundedelen                     |                  |      |
|                              | 6 sjätte sjundedelen                    |                  |      |
|                              | 7 sjunde sjundedelen                    |                  |      |
| season säsong/period         | 1 januari-mars                          |                  |      |
|                              | 2 april-maj                             |                  |      |
|                              | 3 juni-augusti                          |                  |      |
|                              | 4 september-oktober                     |                  |      |
|                              | 5 november-december                     |                  |      |
| holiday större helg          | 1 ingen större helg                     |                  |      |
|                              | 2 större helg (påsk/midsommar/julonyår) |                  |      |

## Categorical Variables Codings

|                              |                                         | Parameter coding |      |
|------------------------------|-----------------------------------------|------------------|------|
|                              |                                         | (12)             | (13) |
|                              | 404060001                               | ,000             | ,000 |
|                              | 404060002                               | ,000             | ,000 |
|                              | 404310003                               | ,000             | ,000 |
|                              | 404310004                               | ,000             | ,000 |
|                              | 502300005                               | ,000             | ,000 |
|                              | 502300006                               | ,000             | ,000 |
|                              | 502300007                               | ,000             | ,000 |
|                              | 502300214                               | ,000             | ,000 |
|                              | 502300411                               | ,000             | ,000 |
|                              | 502300415                               | ,000             | ,000 |
|                              | 502300416                               | ,000             | ,000 |
|                              | 502300811                               | ,000             | ,000 |
|                              | 502300913                               | ,000             | ,000 |
| weekday veckodag             | 1 måndag                                |                  |      |
|                              | 2 tisdag                                |                  |      |
|                              | 3 onsdag                                |                  |      |
|                              | 4 torsdag                               |                  |      |
|                              | 5 fredag                                |                  |      |
|                              | 6 lördag                                |                  |      |
|                              | 7 söndag                                |                  |      |
| sv7 sjättedelar för standard | 1 fjärde sjundedelen                    |                  |      |
|                              | 2 första sjundedelen                    |                  |      |
|                              | 3 andra sjundedelen                     |                  |      |
|                              | 4 tredje sjundedelen                    |                  |      |
|                              | 5 femte sjundedelen                     |                  |      |
|                              | 6 sjätte sjundedelen                    |                  |      |
|                              | 7 sjunde sjundedelen                    |                  |      |
| season säsong/period         | 1 januari-mars                          |                  |      |
|                              | 2 april-maj                             |                  |      |
|                              | 3 juni-augusti                          |                  |      |
|                              | 4 september-oktober                     |                  |      |
|                              | 5 november-december                     |                  |      |
| holiday större helg          | 1 ingen större helg                     |                  |      |
|                              | 2 större helg (påsk/midsommar/julonyår) |                  |      |

## Categorical Variables Codings

|                              |                                         | Parameter coding |      |
|------------------------------|-----------------------------------------|------------------|------|
|                              |                                         | (14)             | (15) |
|                              | 404060001                               | ,000             | ,000 |
|                              | 404060002                               | ,000             | ,000 |
|                              | 404310003                               | ,000             | ,000 |
|                              | 404310004                               | ,000             | ,000 |
|                              | 502300005                               | ,000             | ,000 |
|                              | 502300006                               | ,000             | ,000 |
|                              | 502300007                               | ,000             | ,000 |
|                              | 502300214                               | ,000             | ,000 |
|                              | 502300411                               | ,000             | ,000 |
|                              | 502300415                               | ,000             | ,000 |
|                              | 502300416                               | ,000             | ,000 |
|                              | 502300811                               | ,000             | ,000 |
|                              | 502300913                               | ,000             | ,000 |
| weekday veckodag             | 1 måndag                                |                  |      |
|                              | 2 tisdag                                |                  |      |
|                              | 3 onsdag                                |                  |      |
|                              | 4 torsdag                               |                  |      |
|                              | 5 fredag                                |                  |      |
|                              | 6 lördag                                |                  |      |
|                              | 7 söndag                                |                  |      |
| sv7 sjättedelar för standard | 1 fjärde sjundedelen                    |                  |      |
|                              | 2 första sjundedelen                    |                  |      |
|                              | 3 andra sjundedelen                     |                  |      |
|                              | 4 tredje sjundedelen                    |                  |      |
|                              | 5 femte sjundedelen                     |                  |      |
|                              | 6 sjätte sjundedelen                    |                  |      |
|                              | 7 sjunde sjundedelen                    |                  |      |
| season säsong/period         | 1 januari-mars                          |                  |      |
|                              | 2 april-maj                             |                  |      |
|                              | 3 juni-augusti                          |                  |      |
|                              | 4 september-oktober                     |                  |      |
|                              | 5 november-december                     |                  |      |
| holiday större helg          | 1 ingen större helg                     |                  |      |
|                              | 2 större helg (påsk/midsommar/julonyår) |                  |      |

## Categorical Variables Codings

|                              |                                         | Parameter coding |      |
|------------------------------|-----------------------------------------|------------------|------|
|                              |                                         | (16)             | (17) |
|                              | 404060001                               | ,000             | ,000 |
|                              | 404060002                               | ,000             | ,000 |
|                              | 404310003                               | ,000             | ,000 |
|                              | 404310004                               | ,000             | ,000 |
|                              | 502300005                               | ,000             | ,000 |
|                              | 502300006                               | ,000             | ,000 |
|                              | 502300007                               | ,000             | ,000 |
|                              | 502300214                               | ,000             | ,000 |
|                              | 502300411                               | ,000             | ,000 |
|                              | 502300415                               | ,000             | ,000 |
|                              | 502300416                               | ,000             | ,000 |
|                              | 502300811                               | ,000             | ,000 |
|                              | 502300913                               | ,000             | ,000 |
| weekday veckodag             | 1 måndag                                |                  |      |
|                              | 2 tisdag                                |                  |      |
|                              | 3 onsdag                                |                  |      |
|                              | 4 torsdag                               |                  |      |
|                              | 5 fredag                                |                  |      |
|                              | 6 lördag                                |                  |      |
|                              | 7 söndag                                |                  |      |
| sv7 sjättedelar för standard | 1 fjärde sjundedelen                    |                  |      |
|                              | 2 första sjundedelen                    |                  |      |
|                              | 3 andra sjundedelen                     |                  |      |
|                              | 4 tredje sjundedelen                    |                  |      |
|                              | 5 femte sjundedelen                     |                  |      |
|                              | 6 sjätte sjundedelen                    |                  |      |
|                              | 7 sjunde sjundedelen                    |                  |      |
| season säsong/period         | 1 januari-mars                          |                  |      |
|                              | 2 april-maj                             |                  |      |
|                              | 3 juni-augusti                          |                  |      |
|                              | 4 september-oktober                     |                  |      |
|                              | 5 november-december                     |                  |      |
| holiday större helg          | 1 ingen större helg                     |                  |      |
|                              | 2 större helg (påsk/midsommar/julonyår) |                  |      |



## Categorical Variables Codings

|                              |                                         | Parameter coding |      |
|------------------------------|-----------------------------------------|------------------|------|
|                              |                                         | (18)             | (19) |
|                              | 404060001                               | ,000             | ,000 |
|                              | 404060002                               | ,000             | ,000 |
|                              | 404310003                               | ,000             | ,000 |
|                              | 404310004                               | ,000             | ,000 |
|                              | 502300005                               | ,000             | ,000 |
|                              | 502300006                               | ,000             | ,000 |
|                              | 502300007                               | ,000             | ,000 |
|                              | 502300214                               | ,000             | ,000 |
|                              | 502300411                               | ,000             | ,000 |
|                              | 502300415                               | ,000             | ,000 |
|                              | 502300416                               | ,000             | ,000 |
|                              | 502300811                               | ,000             | ,000 |
|                              | 502300913                               | ,000             | ,000 |
| weekday veckodag             | 1 måndag                                |                  |      |
|                              | 2 tisdag                                |                  |      |
|                              | 3 onsdag                                |                  |      |
|                              | 4 torsdag                               |                  |      |
|                              | 5 fredag                                |                  |      |
|                              | 6 lördag                                |                  |      |
|                              | 7 söndag                                |                  |      |
| sv7 sjättedelar för standard | 1 fjärde sjundedelen                    |                  |      |
|                              | 2 första sjundedelen                    |                  |      |
|                              | 3 andra sjundedelen                     |                  |      |
|                              | 4 tredje sjundedelen                    |                  |      |
|                              | 5 femte sjundedelen                     |                  |      |
|                              | 6 sjätte sjundedelen                    |                  |      |
|                              | 7 sjunde sjundedelen                    |                  |      |
| season säsong/period         | 1 januari-mars                          |                  |      |
|                              | 2 april-maj                             |                  |      |
|                              | 3 juni-augusti                          |                  |      |
|                              | 4 september-oktober                     |                  |      |
|                              | 5 november-december                     |                  |      |
| holiday större helg          | 1 ingen större helg                     |                  |      |
|                              | 2 större helg (påsk/midsommar/julonyår) |                  |      |

## Categorical Variables Codings

|                              |                                         | Parameter coding |      |
|------------------------------|-----------------------------------------|------------------|------|
|                              |                                         | (20)             | (21) |
|                              | 404060001                               | ,000             | ,000 |
|                              | 404060002                               | ,000             | ,000 |
|                              | 404310003                               | ,000             | ,000 |
|                              | 404310004                               | ,000             | ,000 |
|                              | 502300005                               | ,000             | ,000 |
|                              | 502300006                               | ,000             | ,000 |
|                              | 502300007                               | ,000             | ,000 |
|                              | 502300214                               | ,000             | ,000 |
|                              | 502300411                               | ,000             | ,000 |
|                              | 502300415                               | ,000             | ,000 |
|                              | 502300416                               | ,000             | ,000 |
|                              | 502300811                               | ,000             | ,000 |
|                              | 502300913                               | ,000             | ,000 |
| weekday veckodag             | 1 måndag                                |                  |      |
|                              | 2 tisdag                                |                  |      |
|                              | 3 onsdag                                |                  |      |
|                              | 4 torsdag                               |                  |      |
|                              | 5 fredag                                |                  |      |
|                              | 6 lördag                                |                  |      |
|                              | 7 söndag                                |                  |      |
| sv7 sjättedelar för standard | 1 fjärde sjundedelen                    |                  |      |
|                              | 2 första sjundedelen                    |                  |      |
|                              | 3 andra sjundedelen                     |                  |      |
|                              | 4 tredje sjundedelen                    |                  |      |
|                              | 5 femte sjundedelen                     |                  |      |
|                              | 6 sjätte sjundedelen                    |                  |      |
|                              | 7 sjunde sjundedelen                    |                  |      |
| season säsong/period         | 1 januari-mars                          |                  |      |
|                              | 2 april-maj                             |                  |      |
|                              | 3 juni-augusti                          |                  |      |
|                              | 4 september-oktober                     |                  |      |
|                              | 5 november-december                     |                  |      |
| holiday större helg          | 1 ingen större helg                     |                  |      |
|                              | 2 större helg (påsk/midsommar/julonyår) |                  |      |

## Categorical Variables Codings

|                              |                                         | Parameter coding |       |
|------------------------------|-----------------------------------------|------------------|-------|
|                              |                                         | (22)             | (23)  |
|                              | 404060001                               | ,000             | 1,000 |
|                              | 404060002                               | ,000             | ,000  |
|                              | 404310003                               | ,000             | ,000  |
|                              | 404310004                               | ,000             | ,000  |
|                              | 502300005                               | ,000             | ,000  |
|                              | 502300006                               | ,000             | ,000  |
|                              | 502300007                               | ,000             | ,000  |
|                              | 502300214                               | ,000             | ,000  |
|                              | 502300411                               | ,000             | ,000  |
|                              | 502300415                               | ,000             | ,000  |
|                              | 502300416                               | ,000             | ,000  |
|                              | 502300811                               | ,000             | ,000  |
|                              | 502300913                               | ,000             | ,000  |
| weekday veckodag             | 1 måndag                                |                  |       |
|                              | 2 tisdag                                |                  |       |
|                              | 3 onsdag                                |                  |       |
|                              | 4 torsdag                               |                  |       |
|                              | 5 fredag                                |                  |       |
|                              | 6 lördag                                |                  |       |
|                              | 7 söndag                                |                  |       |
| sv7 sjättedelar för standard | 1 fjärde sjundedelen                    |                  |       |
|                              | 2 första sjundedelen                    |                  |       |
|                              | 3 andra sjundedelen                     |                  |       |
|                              | 4 tredje sjundedelen                    |                  |       |
|                              | 5 femte sjundedelen                     |                  |       |
|                              | 6 sjätte sjundedelen                    |                  |       |
|                              | 7 sjunde sjundedelen                    |                  |       |
| season säsong/period         | 1 januari-mars                          |                  |       |
|                              | 2 april-maj                             |                  |       |
|                              | 3 juni-augusti                          |                  |       |
|                              | 4 september-oktober                     |                  |       |
|                              | 5 november-december                     |                  |       |
| holiday större helg          | 1 ingen större helg                     |                  |       |
|                              | 2 större helg (påsk/midsommar/julonyår) |                  |       |

## Categorical Variables Codings

|                              |                                         | Parameter coding |       |
|------------------------------|-----------------------------------------|------------------|-------|
|                              |                                         | (24)             | (25)  |
|                              | 404060001                               | ,000             | ,000  |
|                              | 404060002                               | 1,000            | ,000  |
|                              | 404310003                               | ,000             | 1,000 |
|                              | 404310004                               | ,000             | ,000  |
|                              | 502300005                               | ,000             | ,000  |
|                              | 502300006                               | ,000             | ,000  |
|                              | 502300007                               | ,000             | ,000  |
|                              | 502300214                               | ,000             | ,000  |
|                              | 502300411                               | ,000             | ,000  |
|                              | 502300415                               | ,000             | ,000  |
|                              | 502300416                               | ,000             | ,000  |
|                              | 502300811                               | ,000             | ,000  |
|                              | 502300913                               | ,000             | ,000  |
| weekday veckodag             | 1 måndag                                |                  |       |
|                              | 2 tisdag                                |                  |       |
|                              | 3 onsdag                                |                  |       |
|                              | 4 torsdag                               |                  |       |
|                              | 5 fredag                                |                  |       |
|                              | 6 lördag                                |                  |       |
|                              | 7 söndag                                |                  |       |
| sv7 sjättedelar för standard | 1 fjärde sjundedelen                    |                  |       |
|                              | 2 första sjundedelen                    |                  |       |
|                              | 3 andra sjundedelen                     |                  |       |
|                              | 4 tredje sjundedelen                    |                  |       |
|                              | 5 femte sjundedelen                     |                  |       |
|                              | 6 sjätte sjundedelen                    |                  |       |
|                              | 7 sjunde sjundedelen                    |                  |       |
| season säsong/period         | 1 januari-mars                          |                  |       |
|                              | 2 april-maj                             |                  |       |
|                              | 3 juni-augusti                          |                  |       |
|                              | 4 september-oktober                     |                  |       |
|                              | 5 november-december                     |                  |       |
| holiday större helg          | 1 ingen större helg                     |                  |       |
|                              | 2 större helg (påsk/midsommar/julonyår) |                  |       |

## Categorical Variables Codings

|                              |                                         | Parameter coding |       |
|------------------------------|-----------------------------------------|------------------|-------|
|                              |                                         | (26)             | (27)  |
|                              | 404060001                               | ,000             | ,000  |
|                              | 404060002                               | ,000             | ,000  |
|                              | 404310003                               | ,000             | ,000  |
|                              | 404310004                               | 1,000            | ,000  |
|                              | 502300005                               | ,000             | 1,000 |
|                              | 502300006                               | ,000             | ,000  |
|                              | 502300007                               | ,000             | ,000  |
|                              | 502300214                               | ,000             | ,000  |
|                              | 502300411                               | ,000             | ,000  |
|                              | 502300415                               | ,000             | ,000  |
|                              | 502300416                               | ,000             | ,000  |
|                              | 502300811                               | ,000             | ,000  |
|                              | 502300913                               | ,000             | ,000  |
| weekday veckodag             | 1 måndag                                |                  |       |
|                              | 2 tisdag                                |                  |       |
|                              | 3 onsdag                                |                  |       |
|                              | 4 torsdag                               |                  |       |
|                              | 5 fredag                                |                  |       |
|                              | 6 lördag                                |                  |       |
|                              | 7 söndag                                |                  |       |
| sv7 sjättedelar för standard | 1 fjärde sjundedelen                    |                  |       |
|                              | 2 första sjundedelen                    |                  |       |
|                              | 3 andra sjundedelen                     |                  |       |
|                              | 4 tredje sjundedelen                    |                  |       |
|                              | 5 femte sjundedelen                     |                  |       |
|                              | 6 sjätte sjundedelen                    |                  |       |
|                              | 7 sjunde sjundedelen                    |                  |       |
| season säsong/period         | 1 januari-mars                          |                  |       |
|                              | 2 april-maj                             |                  |       |
|                              | 3 juni-augusti                          |                  |       |
|                              | 4 september-oktober                     |                  |       |
|                              | 5 november-december                     |                  |       |
| holiday större helg          | 1 ingen större helg                     |                  |       |
|                              | 2 större helg (påsk/midsommar/julonyår) |                  |       |

## Categorical Variables Codings

|                              |                                         | Parameter coding |       |
|------------------------------|-----------------------------------------|------------------|-------|
|                              |                                         | (28)             | (29)  |
|                              | 404060001                               | ,000             | ,000  |
|                              | 404060002                               | ,000             | ,000  |
|                              | 404310003                               | ,000             | ,000  |
|                              | 404310004                               | ,000             | ,000  |
|                              | 502300005                               | ,000             | ,000  |
|                              | 502300006                               | 1,000            | ,000  |
|                              | 502300007                               | ,000             | 1,000 |
|                              | 502300214                               | ,000             | ,000  |
|                              | 502300411                               | ,000             | ,000  |
|                              | 502300415                               | ,000             | ,000  |
|                              | 502300416                               | ,000             | ,000  |
|                              | 502300811                               | ,000             | ,000  |
|                              | 502300913                               | ,000             | ,000  |
| weekday veckodag             | 1 måndag                                |                  |       |
|                              | 2 tisdag                                |                  |       |
|                              | 3 onsdag                                |                  |       |
|                              | 4 torsdag                               |                  |       |
|                              | 5 fredag                                |                  |       |
|                              | 6 lördag                                |                  |       |
|                              | 7 söndag                                |                  |       |
| sv7 sjättedelar för standard | 1 fjärde sjundedelen                    |                  |       |
|                              | 2 första sjundedelen                    |                  |       |
|                              | 3 andra sjundedelen                     |                  |       |
|                              | 4 tredje sjundedelen                    |                  |       |
|                              | 5 femte sjundedelen                     |                  |       |
|                              | 6 sjätte sjundedelen                    |                  |       |
|                              | 7 sjunde sjundedelen                    |                  |       |
| season säsong/period         | 1 januari-mars                          |                  |       |
|                              | 2 april-maj                             |                  |       |
|                              | 3 juni-augusti                          |                  |       |
|                              | 4 september-oktober                     |                  |       |
|                              | 5 november-december                     |                  |       |
| holiday större helg          | 1 ingen större helg                     |                  |       |
|                              | 2 större helg (påsk/midsommar/julonyår) |                  |       |

## Categorical Variables Codings

|                              |                                         | Parameter coding |       |
|------------------------------|-----------------------------------------|------------------|-------|
|                              |                                         | (30)             | (31)  |
|                              | 404060001                               | ,000             | ,000  |
|                              | 404060002                               | ,000             | ,000  |
|                              | 404310003                               | ,000             | ,000  |
|                              | 404310004                               | ,000             | ,000  |
|                              | 502300005                               | ,000             | ,000  |
|                              | 502300006                               | ,000             | ,000  |
|                              | 502300007                               | ,000             | ,000  |
|                              | 502300214                               | 1,000            | ,000  |
|                              | 502300411                               | ,000             | 1,000 |
|                              | 502300415                               | ,000             | ,000  |
|                              | 502300416                               | ,000             | ,000  |
|                              | 502300811                               | ,000             | ,000  |
|                              | 502300913                               | ,000             | ,000  |
| weekday veckodag             | 1 måndag                                |                  |       |
|                              | 2 tisdag                                |                  |       |
|                              | 3 onsdag                                |                  |       |
|                              | 4 torsdag                               |                  |       |
|                              | 5 fredag                                |                  |       |
|                              | 6 lördag                                |                  |       |
|                              | 7 söndag                                |                  |       |
| sv7 sjättedelar för standard | 1 fjärde sjundedelen                    |                  |       |
|                              | 2 första sjundedelen                    |                  |       |
|                              | 3 andra sjundedelen                     |                  |       |
|                              | 4 tredje sjundedelen                    |                  |       |
|                              | 5 femte sjundedelen                     |                  |       |
|                              | 6 sjätte sjundedelen                    |                  |       |
|                              | 7 sjunde sjundedelen                    |                  |       |
| season säsong/period         | 1 januari-mars                          |                  |       |
|                              | 2 april-maj                             |                  |       |
|                              | 3 juni-augusti                          |                  |       |
|                              | 4 september-oktober                     |                  |       |
|                              | 5 november-december                     |                  |       |
| holiday större helg          | 1 ingen större helg                     |                  |       |
|                              | 2 större helg (påsk/midsommar/julonyår) |                  |       |

## Categorical Variables Codings

|                              |                                         | Parameter coding |       |
|------------------------------|-----------------------------------------|------------------|-------|
|                              |                                         | (32)             | (33)  |
|                              | 404060001                               | ,000             | ,000  |
|                              | 404060002                               | ,000             | ,000  |
|                              | 404310003                               | ,000             | ,000  |
|                              | 404310004                               | ,000             | ,000  |
|                              | 502300005                               | ,000             | ,000  |
|                              | 502300006                               | ,000             | ,000  |
|                              | 502300007                               | ,000             | ,000  |
|                              | 502300214                               | ,000             | ,000  |
|                              | 502300411                               | ,000             | ,000  |
|                              | 502300415                               | 1,000            | ,000  |
|                              | 502300416                               | ,000             | 1,000 |
|                              | 502300811                               | ,000             | ,000  |
|                              | 502300913                               | ,000             | ,000  |
| weekday veckodag             | 1 måndag                                |                  |       |
|                              | 2 tisdag                                |                  |       |
|                              | 3 onsdag                                |                  |       |
|                              | 4 torsdag                               |                  |       |
|                              | 5 fredag                                |                  |       |
|                              | 6 lördag                                |                  |       |
|                              | 7 söndag                                |                  |       |
| sv7 sjättedelar för standard | 1 fjärde sjundedelen                    |                  |       |
|                              | 2 första sjundedelen                    |                  |       |
|                              | 3 andra sjundedelen                     |                  |       |
|                              | 4 tredje sjundedelen                    |                  |       |
|                              | 5 femte sjundedelen                     |                  |       |
|                              | 6 sjätte sjundedelen                    |                  |       |
|                              | 7 sjunde sjundedelen                    |                  |       |
| season säsong/period         | 1 januari-mars                          |                  |       |
|                              | 2 april-maj                             |                  |       |
|                              | 3 juni-augusti                          |                  |       |
|                              | 4 september-oktober                     |                  |       |
|                              | 5 november-december                     |                  |       |
| holiday större helg          | 1 ingen större helg                     |                  |       |
|                              | 2 större helg (påsk/midsommar/julonyår) |                  |       |



## Categorical Variables Codings

|                              |                                         | Parameter coding |       |
|------------------------------|-----------------------------------------|------------------|-------|
|                              |                                         | (34)             | (35)  |
|                              | 404060001                               | ,000             | ,000  |
|                              | 404060002                               | ,000             | ,000  |
|                              | 404310003                               | ,000             | ,000  |
|                              | 404310004                               | ,000             | ,000  |
|                              | 502300005                               | ,000             | ,000  |
|                              | 502300006                               | ,000             | ,000  |
|                              | 502300007                               | ,000             | ,000  |
|                              | 502300214                               | ,000             | ,000  |
|                              | 502300411                               | ,000             | ,000  |
|                              | 502300415                               | ,000             | ,000  |
|                              | 502300416                               | ,000             | ,000  |
|                              | 502300811                               | 1,000            | ,000  |
|                              | 502300913                               | ,000             | 1,000 |
| weekday veckodag             | 1 måndag                                |                  |       |
|                              | 2 tisdag                                |                  |       |
|                              | 3 onsdag                                |                  |       |
|                              | 4 torsdag                               |                  |       |
|                              | 5 fredag                                |                  |       |
|                              | 6 lördag                                |                  |       |
|                              | 7 söndag                                |                  |       |
| sv7 sjättedelar för standard | 1 fjärde sjundedelen                    |                  |       |
|                              | 2 första sjundedelen                    |                  |       |
|                              | 3 andra sjundedelen                     |                  |       |
|                              | 4 tredje sjundedelen                    |                  |       |
|                              | 5 femte sjundedelen                     |                  |       |
|                              | 6 sjätte sjundedelen                    |                  |       |
|                              | 7 sjunde sjundedelen                    |                  |       |
| season säsong/period         | 1 januari-mars                          |                  |       |
|                              | 2 april-maj                             |                  |       |
|                              | 3 juni-augusti                          |                  |       |
|                              | 4 september-oktober                     |                  |       |
|                              | 5 november-december                     |                  |       |
| holiday större helg          | 1 ingen större helg                     |                  |       |
|                              | 2 större helg (påsk/midsommar/julonyår) |                  |       |

**Block 0: Beginning Block**

Classification Table<sup>a,b</sup>

| Observed           |                                                   |                                                              |
|--------------------|---------------------------------------------------|--------------------------------------------------------------|
| Step 0             | seuraust3 seuraus highest = haitta (i någon form) | 0 ingen händelse eller ei haittaa<br>1 haitta (i någon form) |
| Overall Percentage |                                                   |                                                              |

Classification Table<sup>a,b</sup>

| Observed           |                                                   |                                                              | Predicted                         |
|--------------------|---------------------------------------------------|--------------------------------------------------------------|-----------------------------------|
|                    |                                                   |                                                              | seuraust3 seuraus highest         |
|                    |                                                   |                                                              | 0 ingen händelse eller ei haittaa |
| Step 0             | seuraust3 seuraus highest = haitta (i någon form) | 0 ingen händelse eller ei haittaa<br>1 haitta (i någon form) | 12075<br>400                      |
| Overall Percentage |                                                   |                                                              |                                   |

Classification Table<sup>a,b</sup>

| Observed           |                                                   |                                                              | Predicted                    |
|--------------------|---------------------------------------------------|--------------------------------------------------------------|------------------------------|
|                    |                                                   |                                                              | seuraust3 seuraus highest .. |
|                    |                                                   |                                                              | 1 haitta (i någon form)      |
| Step 0             | seuraust3 seuraus highest = haitta (i någon form) | 0 ingen händelse eller ei haittaa<br>1 haitta (i någon form) | 0<br>0                       |
| Overall Percentage |                                                   |                                                              |                              |

Classification Table<sup>a,b</sup>

| Observed           |                                                   |                                                              | Predicted          |
|--------------------|---------------------------------------------------|--------------------------------------------------------------|--------------------|
|                    |                                                   |                                                              | Percentage Correct |
| Step 0             | seuraust3 seuraus highest = haitta (i någon form) | 0 ingen händelse eller ei haittaa<br>1 haitta (i någon form) | 100,0<br>,0        |
| Overall Percentage |                                                   |                                                              | 96,8               |

a. Constant is included in the model.

b. The cut value is ,500

## Variables in the Equation

|                 | B      | S.E. | Wald     | df | Sig. | Exp(B) |
|-----------------|--------|------|----------|----|------|--------|
| Step 0 Constant | -3,407 | ,051 | 4495,313 | 1  | ,000 | ,033   |

## Variables not in the Equation

|                      | Score   | df | Sig. |
|----------------------|---------|----|------|
| Step 0 Variables sv7 | 16,156  | 6  | ,013 |
| sv7(1)               | 7,549   | 1  | ,006 |
| sv7(2)               | 2,716   | 1  | ,099 |
| sv7(3)               | ,300    | 1  | ,584 |
| sv7(4)               | 1,121   | 1  | ,290 |
| sv7(5)               | 3,082   | 1  | ,079 |
| sv7(6)               | 4,983   | 1  | ,026 |
| VASTY2               | 321,056 | 35 | ,000 |
| VASTY2(1)            | 1,769   | 1  | ,184 |
| VASTY2(2)            | 27,206  | 1  | ,000 |
| VASTY2(3)            | 8,562   | 1  | ,003 |
| VASTY2(4)            | ,988    | 1  | ,320 |
| VASTY2(5)            | ,587    | 1  | ,444 |
| VASTY2(6)            | 8,528   | 1  | ,003 |
| VASTY2(7)            | 2,666   | 1  | ,103 |
| VASTY2(8)            | ,008    | 1  | ,929 |
| VASTY2(9)            | 19,221  | 1  | ,000 |
| VASTY2(10)           | 58,192  | 1  | ,000 |
| VASTY2(11)           | 21,278  | 1  | ,000 |
| VASTY2(12)           | 2,551   | 1  | ,110 |
| VASTY2(13)           | 62,883  | 1  | ,000 |
| VASTY2(14)           | ,045    | 1  | ,832 |
| VASTY2(15)           | 8,562   | 1  | ,003 |
| VASTY2(16)           | 1,322   | 1  | ,250 |
| VASTY2(17)           | 2,012   | 1  | ,156 |
| VASTY2(18)           | 6,791   | 1  | ,009 |
| VASTY2(19)           | 10,418  | 1  | ,001 |
| VASTY2(20)           | ,662    | 1  | ,416 |
| VASTY2(21)           | 8,562   | 1  | ,003 |
| VASTY2(22)           | 5,396   | 1  | ,020 |
| VASTY2(23)           | ,045    | 1  | ,832 |
| VASTY2(24)           | 5,427   | 1  | ,020 |
| VASTY2(25)           | 6,092   | 1  | ,014 |
| VASTY2(26)           | 7,868   | 1  | ,005 |
| VASTY2(27)           | 5,427   | 1  | ,020 |
| VASTY2(28)           | ,715    | 1  | ,398 |
| VASTY2(29)           | 2,983   | 1  | ,084 |
| VASTY2(30)           | 2,034   | 1  | ,154 |
| VASTY2(31)           | 30,255  | 1  | ,000 |

## Variables not in the Equation

|                    | Score   | df | Sig. |
|--------------------|---------|----|------|
| VASTY2(32)         | 1,902   | 1  | ,168 |
| VASTY2(33)         | 1,968   | 1  | ,161 |
| VASTY2(34)         | 6,856   | 1  | ,009 |
| VASTY2(35)         | ,127    | 1  | ,722 |
| weekday            | 12,260  | 6  | ,056 |
| weekday(1)         | 2,946   | 1  | ,086 |
| weekday(2)         | ,062    | 1  | ,804 |
| weekday(3)         | ,254    | 1  | ,615 |
| weekday(4)         | 2,864   | 1  | ,091 |
| weekday(5)         | ,463    | 1  | ,496 |
| weekday(6)         | 7,621   | 1  | ,006 |
| holiday(1)         | 1,875   | 1  | ,171 |
| season             | 11,711  | 4  | ,020 |
| season(1)          | ,494    | 1  | ,482 |
| season(2)          | ,040    | 1  | ,842 |
| season(3)          | 3,188   | 1  | ,074 |
| season(4)          | 8,641   | 1  | ,003 |
| Overall Statistics | 351,629 | 52 | ,000 |

## Block 1: Method = Enter

## Omnibus Tests of Model Coefficients

|             | Chi-square | df | Sig. |
|-------------|------------|----|------|
| Step 1 Step | 328,261    | 52 | ,000 |
| Block       | 328,261    | 52 | ,000 |
| Model       | 328,261    | 52 | ,000 |

## Model Summary

| Step | -2 Log likelihood     | Cox & Snell R Square | Nagelkerke R Square |
|------|-----------------------|----------------------|---------------------|
| 1    | 3210,788 <sup>a</sup> | ,026                 | ,105                |

a. Estimation terminated at iteration number 9 because parameter estimates changed by less than ,001.

Classification Table<sup>a</sup>

|        |                                                   |                                                              |
|--------|---------------------------------------------------|--------------------------------------------------------------|
|        | Observed                                          |                                                              |
| Step 1 | seuraust3 seuraus highest = haitta (i någon form) | 0 ingen händelse eller ei haittaa<br>1 haitta (i någon form) |
|        | Overall Percentage                                |                                                              |

Classification Table<sup>a</sup>

|        |                                                   |                                                              |                                   |
|--------|---------------------------------------------------|--------------------------------------------------------------|-----------------------------------|
|        |                                                   |                                                              | Predicted                         |
|        |                                                   |                                                              | seuraust3 seuraus highest         |
|        |                                                   |                                                              | 0 ingen händelse eller ei haittaa |
|        | Observed                                          |                                                              |                                   |
| Step 1 | seuraust3 seuraus highest = haitta (i någon form) | 0 ingen händelse eller ei haittaa<br>1 haitta (i någon form) | 12075<br>400                      |
|        | Overall Percentage                                |                                                              |                                   |

Classification Table<sup>a</sup>

|        |                                                   |                                                              |                              |
|--------|---------------------------------------------------|--------------------------------------------------------------|------------------------------|
|        |                                                   |                                                              | Predicted                    |
|        |                                                   |                                                              | seuraust3 seuraus highest .. |
|        |                                                   |                                                              | 1 haitta (i någon form)      |
|        | Observed                                          |                                                              |                              |
| Step 1 | seuraust3 seuraus highest = haitta (i någon form) | 0 ingen händelse eller ei haittaa<br>1 haitta (i någon form) | 0<br>0                       |
|        | Overall Percentage                                |                                                              |                              |

Classification Table<sup>a</sup>

|        |                                                   |                                                              |                    |
|--------|---------------------------------------------------|--------------------------------------------------------------|--------------------|
|        |                                                   |                                                              | Predicted          |
|        |                                                   |                                                              |                    |
|        |                                                   |                                                              | Percentage Correct |
|        | Observed                                          |                                                              |                    |
| Step 1 | seuraust3 seuraus highest = haitta (i någon form) | 0 ingen händelse eller ei haittaa<br>1 haitta (i någon form) | 100,0<br>,0        |
|        | Overall Percentage                                |                                                              | 96,8               |

a. The cut value is ,500

## Variables in the Equation

|                         | B      | S.E.  | Wald    | df | Sig. | Exp(B) |
|-------------------------|--------|-------|---------|----|------|--------|
| Step 1 <sup>a</sup> sv7 |        |       | 3,282   | 6  | ,773 |        |
| sv7(1)                  | -,065  | ,222  | ,087    | 1  | ,768 | ,937   |
| sv7(2)                  | -,206  | ,245  | ,712    | 1  | ,399 | ,813   |
| sv7(3)                  | -,013  | ,229  | ,003    | 1  | ,955 | ,987   |
| sv7(4)                  | ,147   | ,209  | ,489    | 1  | ,484 | 1,158  |
| sv7(5)                  | -,029  | ,203  | ,020    | 1  | ,887 | ,972   |
| sv7(6)                  | ,165   | ,223  | ,549    | 1  | ,459 | 1,179  |
| VASTY2                  |        |       | 221,129 | 35 | ,000 |        |
| VASTY2(1)               | ,601   | ,426  | 1,990   | 1  | ,158 | 1,823  |
| VASTY2(2)               | 1,171  | ,399  | 8,608   | 1  | ,003 | 3,224  |
| VASTY2(3)               | -1,500 | ,786  | 3,644   | 1  | ,056 | ,223   |
| VASTY2(4)               | ,563   | ,430  | 1,717   | 1  | ,190 | 1,756  |
| VASTY2(5)               | ,538   | ,444  | 1,467   | 1  | ,226 | 1,712  |
| VASTY2(6)               | -1,644 | ,797  | 4,250   | 1  | ,039 | ,193   |
| VASTY2(7)               | ,672   | ,420  | 2,560   | 1  | ,110 | 1,958  |
| VASTY2(8)               | ,342   | ,450  | ,576    | 1  | ,448 | 1,407  |
| VASTY2(9)               | 1,153  | ,397  | 8,417   | 1  | ,004 | 3,166  |
| VASTY2(10)              | 1,423  | ,394  | 13,066  | 1  | ,000 | 4,151  |
| VASTY2(11)              | 1,164  | ,394  | 8,747   | 1  | ,003 | 3,203  |
| VASTY2(12)              | ,606   | ,426  | 2,028   | 1  | ,154 | 1,834  |
| VASTY2(13)              | 1,437  | ,396  | 13,154  | 1  | ,000 | 4,206  |
| VASTY2(14)              | ,167   | ,461  | ,131    | 1  | ,718 | 1,181  |
| VASTY2(15)              | -1,594 | ,791  | 4,061   | 1  | ,044 | ,203   |
| VASTY2(16)              | -,515  | ,677  | ,578    | 1  | ,447 | ,598   |
| VASTY2(17)              | -,223  | ,511  | ,190    | 1  | ,663 | ,800   |
| VASTY2(18)              | -1,040 | ,687  | 2,290   | 1  | ,130 | ,353   |
| VASTY2(19)              | -2,156 | 1,069 | 4,070   | 1  | ,044 | ,116   |
| VASTY2(20)              | ,422   | ,455  | ,861    | 1  | ,353 | 1,525  |
| VASTY2(21)              | -1,505 | ,786  | 3,667   | 1  | ,055 | ,222   |
| VASTY2(22)              | -,824  | ,606  | 1,850   | 1  | ,174 | ,439   |
| VASTY2(23)              | ,211   | ,457  | ,214    | 1  | ,644 | 1,235  |
| VASTY2(24)              | -,871  | ,607  | 2,058   | 1  | ,151 | ,419   |
| VASTY2(25)              | -1,292 | ,787  | 2,694   | 1  | ,101 | ,275   |
| VASTY2(26)              | -2,045 | 1,058 | 3,739   | 1  | ,053 | ,129   |
| VASTY2(27)              | -,897  | ,611  | 2,152   | 1  | ,142 | ,408   |
| VASTY2(28)              | -,253  | ,587  | ,185    | 1  | ,667 | ,777   |
| VASTY2(29)              | -,592  | ,558  | 1,122   | 1  | ,289 | ,553   |
| VASTY2(30)              | -,223  | ,512  | ,190    | 1  | ,663 | ,800   |
| VASTY2(31)              | 1,328  | ,405  | 10,762  | 1  | ,001 | 3,772  |
| VASTY2(32)              | -,189  | ,531  | ,127    | 1  | ,722 | ,828   |
| VASTY2(33)              | -,204  | ,534  | ,146    | 1  | ,703 | ,816   |
| VASTY2(34)              | -1,123 | ,671  | 2,796   | 1  | ,094 | ,325   |

## Variables in the Equation

|                     |            | 95% C.I. for EXP(B) |       |
|---------------------|------------|---------------------|-------|
|                     |            | Lower               | Upper |
| Step 1 <sup>a</sup> | sv7        |                     |       |
|                     | sv7(1)     | ,606                | 1,447 |
|                     | sv7(2)     | ,504                | 1,314 |
|                     | sv7(3)     | ,630                | 1,546 |
|                     | sv7(4)     | ,768                | 1,746 |
|                     | sv7(5)     | ,653                | 1,445 |
|                     | sv7(6)     | ,762                | 1,825 |
|                     | VASTY2     |                     |       |
|                     | VASTY2(1)  | ,791                | 4,201 |
|                     | VASTY2(2)  | 1,475               | 7,049 |
|                     | VASTY2(3)  | ,048                | 1,041 |
|                     | VASTY2(4)  | ,756                | 4,076 |
|                     | VASTY2(5)  | ,717                | 4,088 |
|                     | VASTY2(6)  | ,040                | ,922  |
|                     | VASTY2(7)  | ,860                | 4,458 |
|                     | VASTY2(8)  | ,583                | 3,400 |
|                     | VASTY2(9)  | 1,453               | 6,897 |
|                     | VASTY2(10) | 1,919               | 8,981 |
|                     | VASTY2(11) | 1,481               | 6,928 |
|                     | VASTY2(12) | ,796                | 4,224 |
|                     | VASTY2(13) | 1,935               | 9,142 |
|                     | VASTY2(14) | ,479                | 2,913 |
|                     | VASTY2(15) | ,043                | ,957  |
|                     | VASTY2(16) | ,159                | 2,252 |
|                     | VASTY2(17) | ,294                | 2,180 |
|                     | VASTY2(18) | ,092                | 1,359 |
|                     | VASTY2(19) | ,014                | ,941  |
|                     | VASTY2(20) | ,625                | 3,721 |
|                     | VASTY2(21) | ,048                | 1,036 |
|                     | VASTY2(22) | ,134                | 1,438 |
|                     | VASTY2(23) | ,505                | 3,024 |
|                     | VASTY2(24) | ,127                | 1,376 |
|                     | VASTY2(25) | ,059                | 1,285 |
|                     | VASTY2(26) | ,016                | 1,028 |
|                     | VASTY2(27) | ,123                | 1,352 |
|                     | VASTY2(28) | ,246                | 2,455 |
|                     | VASTY2(29) | ,185                | 1,653 |
|                     | VASTY2(30) | ,293                | 2,182 |
|                     | VASTY2(31) | 1,706               | 8,337 |
|                     | VASTY2(32) | ,292                | 2,344 |
|                     | VASTY2(33) | ,287                | 2,322 |
|                     | VASTY2(34) | ,087                | 1,213 |

## Variables in the Equation

|            | B      | S.E. | Wald   | df | Sig. | Exp(B) |
|------------|--------|------|--------|----|------|--------|
| VASTY2(35) | ,114   | ,480 | ,056   | 1  | ,812 | 1,121  |
| weekday    |        |      | 12,916 | 6  | ,044 |        |
| weekday(1) | ,226   | ,185 | 1,486  | 1  | ,223 | 1,254  |
| weekday(2) | -,016  | ,195 | ,006   | 1  | ,937 | ,985   |
| weekday(3) | ,081   | ,191 | ,178   | 1  | ,673 | 1,084  |
| weekday(4) | ,244   | ,186 | 1,712  | 1  | ,191 | 1,276  |
| weekday(5) | -,059  | ,200 | ,087   | 1  | ,768 | ,943   |
| weekday(6) | -,412  | ,218 | 3,586  | 1  | ,058 | ,662   |
| holiday(1) | -,466  | ,373 | 1,559  | 1  | ,212 | ,628   |
| season     |        |      | 10,304 | 4  | ,036 |        |
| season(1)  | -,207  | ,162 | 1,629  | 1  | ,202 | ,813   |
| season(2)  | -,096  | ,147 | ,428   | 1  | ,513 | ,909   |
| season(3)  | ,067   | ,151 | ,195   | 1  | ,658 | 1,069  |
| season(4)  | -,490  | ,181 | 7,340  | 1  | ,007 | ,613   |
| Constant   | -3,575 | ,395 | 82,069 | 1  | ,000 | ,028   |

## Variables in the Equation

|            | 95% C.I. for EXP(B) |       |
|------------|---------------------|-------|
|            | Lower               | Upper |
| VASTY2(35) | ,437                | 2,872 |
| weekday    |                     |       |
| weekday(1) | ,872                | 1,803 |
| weekday(2) | ,672                | 1,443 |
| weekday(3) | ,745                | 1,577 |
| weekday(4) | ,886                | 1,839 |
| weekday(5) | ,637                | 1,395 |
| weekday(6) | ,432                | 1,015 |
| holiday(1) | ,302                | 1,304 |
| season     |                     |       |
| season(1)  | ,592                | 1,117 |
| season(2)  | ,682                | 1,211 |
| season(3)  | ,796                | 1,436 |
| season(4)  | ,430                | ,873  |
| Constant   |                     |       |

a. Variable(s) entered on step 1: sv7, VASTY2, weekday, holiday, season.

\*\*

```
LOGISTIC REGRESSION VARIABLES handlt1
/METHOD=ENTER bv1 VASTY2 weekday holiday season
/CONTRAST (bv1)=Indicator(1)
/CONTRAST (VASTY2)=Indicator(1)
```



```

1
2
3 /CONTRAST (weekday)=Indicator(1)
4 /CONTRAST (holiday)=Indicator(1)
5 /CONTRAST (season)=Indicator(1)
6 /PRINT=CI(95)
7
8 /CRITERIA=PIN(0.05) POUT(0.10) ITERATE(20) CUT(0.5).
9

```

## Logistic Regression

[DataSet6] C:\cWordjan\Rafaela\_VCS\alla\_tillsammans\abo\_bjo\_vasa\_v1.sav

### Case Processing Summary

| Unweighted Cases <sup>a</sup> |                      | N     | Percent |
|-------------------------------|----------------------|-------|---------|
| Selected Cases                | Included in Analysis | 12475 | 100,0   |
|                               | Missing Cases        | 0     | ,0      |
|                               | Total                | 12475 | 100,0   |
| Unselected Cases              |                      | 0     | ,0      |
| Total                         |                      | 12475 | 100,0   |

a. If weight is in effect, see classification table for the total number of cases.

### Dependent Variable Encoding

| Original Value            | Internal Value |
|---------------------------|----------------|
| 0 ingen eller en händelse | 0              |
| 1 mer än en händelse      | 1              |

## Categorical Variables Codings

|                           |           | Frequency | Parameter<br>(1) |
|---------------------------|-----------|-----------|------------------|
| VASTY2 (SAIR*10000)+VASTY | 403073101 | 365       | ,000             |
|                           | 403073102 | 362       | 1,000            |
|                           | 403073103 | 365       | ,000             |
|                           | 403073202 | 365       | ,000             |
|                           | 403073203 | 365       | ,000             |
|                           | 403073204 | 330       | ,000             |
|                           | 403073303 | 364       | ,000             |
|                           | 403073651 | 362       | ,000             |
|                           | 403073771 | 365       | ,000             |
|                           | 403133102 | 341       | ,000             |
|                           | 403133106 | 365       | ,000             |
|                           | 403133107 | 365       | ,000             |
|                           | 403133109 | 365       | ,000             |
|                           | 403133202 | 365       | ,000             |
|                           | 403133203 | 365       | ,000             |
|                           | 403133204 | 365       | ,000             |
|                           | 403133315 | 177       | ,000             |
|                           | 403133322 | 365       | ,000             |
|                           | 403133401 | 362       | ,000             |
|                           | 403133402 | 365       | ,000             |
|                           | 403133550 | 298       | ,000             |
|                           | 403133772 | 365       | ,000             |
|                           | 403135803 | 365       | ,000             |
|                           | 404060001 | 365       | ,000             |
|                           | 404060002 | 366       | ,000             |
|                           | 404310003 | 291       | ,000             |
|                           | 404310004 | 291       | ,000             |
|                           | 502300005 | 366       | ,000             |
|                           | 502300006 | 225       | ,000             |
|                           | 502300007 | 366       | ,000             |
|                           | 502300214 | 366       | ,000             |
|                           | 502300411 | 366       | ,000             |
|                           | 502300415 | 360       | ,000             |
|                           | 502300416 | 363       | ,000             |
|                           | 502300811 | 364       | ,000             |
|                           | 502300913 | 315       | ,000             |
| weekday veckodag          | 1 måndag  | 1805      | ,000             |
|                           | 2 tisdag  | 1812      | 1,000            |

## Categorical Variables Codings

|                           |           | Parameter coding |       |
|---------------------------|-----------|------------------|-------|
|                           |           | (2)              | (3)   |
| VASTY2 (SAIR*10000)+VASTY | 403073101 | ,000             | ,000  |
|                           | 403073102 | ,000             | ,000  |
|                           | 403073103 | 1,000            | ,000  |
|                           | 403073202 | ,000             | 1,000 |
|                           | 403073203 | ,000             | ,000  |
|                           | 403073204 | ,000             | ,000  |
|                           | 403073303 | ,000             | ,000  |
|                           | 403073651 | ,000             | ,000  |
|                           | 403073771 | ,000             | ,000  |
|                           | 403133102 | ,000             | ,000  |
|                           | 403133106 | ,000             | ,000  |
|                           | 403133107 | ,000             | ,000  |
|                           | 403133109 | ,000             | ,000  |
|                           | 403133202 | ,000             | ,000  |
|                           | 403133203 | ,000             | ,000  |
|                           | 403133204 | ,000             | ,000  |
|                           | 403133315 | ,000             | ,000  |
|                           | 403133322 | ,000             | ,000  |
|                           | 403133401 | ,000             | ,000  |
|                           | 403133402 | ,000             | ,000  |
|                           | 403133550 | ,000             | ,000  |
|                           | 403133772 | ,000             | ,000  |
|                           | 403135803 | ,000             | ,000  |
|                           | 404060001 | ,000             | ,000  |
|                           | 404060002 | ,000             | ,000  |
|                           | 404310003 | ,000             | ,000  |
|                           | 404310004 | ,000             | ,000  |
|                           | 502300005 | ,000             | ,000  |
|                           | 502300006 | ,000             | ,000  |
|                           | 502300007 | ,000             | ,000  |
|                           | 502300214 | ,000             | ,000  |
|                           | 502300411 | ,000             | ,000  |
|                           | 502300415 | ,000             | ,000  |
|                           | 502300416 | ,000             | ,000  |
|                           | 502300811 | ,000             | ,000  |
|                           | 502300913 | ,000             | ,000  |
| weekday veckodag          | 1 måndag  | ,000             | ,000  |
|                           | 2 tisdag  | ,000             | ,000  |

## Categorical Variables Codings

|                           |           | Parameter coding |       |
|---------------------------|-----------|------------------|-------|
|                           |           | (4)              | (5)   |
| VASTY2 (SAIR*10000)+VASTY | 403073101 | ,000             | ,000  |
|                           | 403073102 | ,000             | ,000  |
|                           | 403073103 | ,000             | ,000  |
|                           | 403073202 | ,000             | ,000  |
|                           | 403073203 | 1,000            | ,000  |
|                           | 403073204 | ,000             | 1,000 |
|                           | 403073303 | ,000             | ,000  |
|                           | 403073651 | ,000             | ,000  |
|                           | 403073771 | ,000             | ,000  |
|                           | 403133102 | ,000             | ,000  |
|                           | 403133106 | ,000             | ,000  |
|                           | 403133107 | ,000             | ,000  |
|                           | 403133109 | ,000             | ,000  |
|                           | 403133202 | ,000             | ,000  |
|                           | 403133203 | ,000             | ,000  |
|                           | 403133204 | ,000             | ,000  |
|                           | 403133315 | ,000             | ,000  |
|                           | 403133322 | ,000             | ,000  |
|                           | 403133401 | ,000             | ,000  |
|                           | 403133402 | ,000             | ,000  |
|                           | 403133550 | ,000             | ,000  |
|                           | 403133772 | ,000             | ,000  |
|                           | 403135803 | ,000             | ,000  |
|                           | 404060001 | ,000             | ,000  |
|                           | 404060002 | ,000             | ,000  |
|                           | 404310003 | ,000             | ,000  |
|                           | 404310004 | ,000             | ,000  |
|                           | 502300005 | ,000             | ,000  |
|                           | 502300006 | ,000             | ,000  |
|                           | 502300007 | ,000             | ,000  |
|                           | 502300214 | ,000             | ,000  |
|                           | 502300411 | ,000             | ,000  |
|                           | 502300415 | ,000             | ,000  |
|                           | 502300416 | ,000             | ,000  |
|                           | 502300811 | ,000             | ,000  |
|                           | 502300913 | ,000             | ,000  |
| weekday veckodag          | 1 måndag  | ,000             | ,000  |
|                           | 2 tisdag  | ,000             | ,000  |

## Categorical Variables Codings

|                           |           | Parameter coding |       |
|---------------------------|-----------|------------------|-------|
|                           |           | (6)              | (7)   |
| VASTY2 (SAIR*10000)+VASTY | 403073101 | ,000             | ,000  |
|                           | 403073102 | ,000             | ,000  |
|                           | 403073103 | ,000             | ,000  |
|                           | 403073202 | ,000             | ,000  |
|                           | 403073203 | ,000             | ,000  |
|                           | 403073204 | ,000             | ,000  |
|                           | 403073303 | 1,000            | ,000  |
|                           | 403073651 | ,000             | 1,000 |
|                           | 403073771 | ,000             | ,000  |
|                           | 403133102 | ,000             | ,000  |
|                           | 403133106 | ,000             | ,000  |
|                           | 403133107 | ,000             | ,000  |
|                           | 403133109 | ,000             | ,000  |
|                           | 403133202 | ,000             | ,000  |
|                           | 403133203 | ,000             | ,000  |
|                           | 403133204 | ,000             | ,000  |
|                           | 403133315 | ,000             | ,000  |
|                           | 403133322 | ,000             | ,000  |
|                           | 403133401 | ,000             | ,000  |
|                           | 403133402 | ,000             | ,000  |
|                           | 403133550 | ,000             | ,000  |
|                           | 403133772 | ,000             | ,000  |
|                           | 403135803 | ,000             | ,000  |
|                           | 404060001 | ,000             | ,000  |
|                           | 404060002 | ,000             | ,000  |
|                           | 404310003 | ,000             | ,000  |
|                           | 404310004 | ,000             | ,000  |
|                           | 502300005 | ,000             | ,000  |
|                           | 502300006 | ,000             | ,000  |
|                           | 502300007 | ,000             | ,000  |
|                           | 502300214 | ,000             | ,000  |
|                           | 502300411 | ,000             | ,000  |
|                           | 502300415 | ,000             | ,000  |
|                           | 502300416 | ,000             | ,000  |
|                           | 502300811 | ,000             | ,000  |
|                           | 502300913 | ,000             | ,000  |
| weekday veckodag          | 1 måndag  | ,000             |       |
|                           | 2 tisdag  | ,000             |       |

## Categorical Variables Codings

|                           |           | Parameter coding |       |
|---------------------------|-----------|------------------|-------|
|                           |           | (8)              | (9)   |
| VASTY2 (SAIR*10000)+VASTY | 403073101 | ,000             | ,000  |
|                           | 403073102 | ,000             | ,000  |
|                           | 403073103 | ,000             | ,000  |
|                           | 403073202 | ,000             | ,000  |
|                           | 403073203 | ,000             | ,000  |
|                           | 403073204 | ,000             | ,000  |
|                           | 403073303 | ,000             | ,000  |
|                           | 403073651 | ,000             | ,000  |
|                           | 403073771 | 1,000            | ,000  |
|                           | 403133102 | ,000             | 1,000 |
|                           | 403133106 | ,000             | ,000  |
|                           | 403133107 | ,000             | ,000  |
|                           | 403133109 | ,000             | ,000  |
|                           | 403133202 | ,000             | ,000  |
|                           | 403133203 | ,000             | ,000  |
|                           | 403133204 | ,000             | ,000  |
|                           | 403133315 | ,000             | ,000  |
|                           | 403133322 | ,000             | ,000  |
|                           | 403133401 | ,000             | ,000  |
|                           | 403133402 | ,000             | ,000  |
|                           | 403133550 | ,000             | ,000  |
|                           | 403133772 | ,000             | ,000  |
|                           | 403135803 | ,000             | ,000  |
|                           | 404060001 | ,000             | ,000  |
|                           | 404060002 | ,000             | ,000  |
|                           | 404310003 | ,000             | ,000  |
|                           | 404310004 | ,000             | ,000  |
|                           | 502300005 | ,000             | ,000  |
|                           | 502300006 | ,000             | ,000  |
|                           | 502300007 | ,000             | ,000  |
|                           | 502300214 | ,000             | ,000  |
|                           | 502300411 | ,000             | ,000  |
|                           | 502300415 | ,000             | ,000  |
|                           | 502300416 | ,000             | ,000  |
|                           | 502300811 | ,000             | ,000  |
|                           | 502300913 | ,000             | ,000  |
| weekday veckodag          | 1 måndag  |                  |       |
|                           | 2 tisdag  |                  |       |

## Categorical Variables Codings

|                           |           | Parameter coding |       |
|---------------------------|-----------|------------------|-------|
|                           |           | (10)             | (11)  |
| VASTY2 (SAIR*10000)+VASTY | 403073101 | ,000             | ,000  |
|                           | 403073102 | ,000             | ,000  |
|                           | 403073103 | ,000             | ,000  |
|                           | 403073202 | ,000             | ,000  |
|                           | 403073203 | ,000             | ,000  |
|                           | 403073204 | ,000             | ,000  |
|                           | 403073303 | ,000             | ,000  |
|                           | 403073651 | ,000             | ,000  |
|                           | 403073771 | ,000             | ,000  |
|                           | 403133102 | ,000             | ,000  |
|                           | 403133106 | 1,000            | ,000  |
|                           | 403133107 | ,000             | 1,000 |
|                           | 403133109 | ,000             | ,000  |
|                           | 403133202 | ,000             | ,000  |
|                           | 403133203 | ,000             | ,000  |
|                           | 403133204 | ,000             | ,000  |
|                           | 403133315 | ,000             | ,000  |
|                           | 403133322 | ,000             | ,000  |
|                           | 403133401 | ,000             | ,000  |
|                           | 403133402 | ,000             | ,000  |
|                           | 403133550 | ,000             | ,000  |
|                           | 403133772 | ,000             | ,000  |
|                           | 403135803 | ,000             | ,000  |
|                           | 404060001 | ,000             | ,000  |
|                           | 404060002 | ,000             | ,000  |
|                           | 404310003 | ,000             | ,000  |
|                           | 404310004 | ,000             | ,000  |
|                           | 502300005 | ,000             | ,000  |
|                           | 502300006 | ,000             | ,000  |
|                           | 502300007 | ,000             | ,000  |
|                           | 502300214 | ,000             | ,000  |
|                           | 502300411 | ,000             | ,000  |
|                           | 502300415 | ,000             | ,000  |
|                           | 502300416 | ,000             | ,000  |
|                           | 502300811 | ,000             | ,000  |
|                           | 502300913 | ,000             | ,000  |
| weekday veckodag          | 1 måndag  |                  |       |
|                           | 2 tisdag  |                  |       |

## Categorical Variables Codings

|                           |           | Parameter coding |       |
|---------------------------|-----------|------------------|-------|
|                           |           | (12)             | (13)  |
| VASTY2 (SAIR*10000)+VASTY | 403073101 | ,000             | ,000  |
|                           | 403073102 | ,000             | ,000  |
|                           | 403073103 | ,000             | ,000  |
|                           | 403073202 | ,000             | ,000  |
|                           | 403073203 | ,000             | ,000  |
|                           | 403073204 | ,000             | ,000  |
|                           | 403073303 | ,000             | ,000  |
|                           | 403073651 | ,000             | ,000  |
|                           | 403073771 | ,000             | ,000  |
|                           | 403133102 | ,000             | ,000  |
|                           | 403133106 | ,000             | ,000  |
|                           | 403133107 | ,000             | ,000  |
|                           | 403133109 | 1,000            | ,000  |
|                           | 403133202 | ,000             | 1,000 |
|                           | 403133203 | ,000             | ,000  |
|                           | 403133204 | ,000             | ,000  |
|                           | 403133315 | ,000             | ,000  |
|                           | 403133322 | ,000             | ,000  |
|                           | 403133401 | ,000             | ,000  |
|                           | 403133402 | ,000             | ,000  |
|                           | 403133550 | ,000             | ,000  |
|                           | 403133772 | ,000             | ,000  |
|                           | 403135803 | ,000             | ,000  |
|                           | 404060001 | ,000             | ,000  |
|                           | 404060002 | ,000             | ,000  |
|                           | 404310003 | ,000             | ,000  |
|                           | 404310004 | ,000             | ,000  |
|                           | 502300005 | ,000             | ,000  |
|                           | 502300006 | ,000             | ,000  |
|                           | 502300007 | ,000             | ,000  |
|                           | 502300214 | ,000             | ,000  |
|                           | 502300411 | ,000             | ,000  |
|                           | 502300415 | ,000             | ,000  |
|                           | 502300416 | ,000             | ,000  |
|                           | 502300811 | ,000             | ,000  |
|                           | 502300913 | ,000             | ,000  |
| weekday veckodag          | 1 måndag  |                  |       |
|                           | 2 tisdag  |                  |       |



## Categorical Variables Codings

|                           |           | Parameter coding |       |
|---------------------------|-----------|------------------|-------|
|                           |           | (14)             | (15)  |
| VASTY2 (SAIR*10000)+VASTY | 403073101 | ,000             | ,000  |
|                           | 403073102 | ,000             | ,000  |
|                           | 403073103 | ,000             | ,000  |
|                           | 403073202 | ,000             | ,000  |
|                           | 403073203 | ,000             | ,000  |
|                           | 403073204 | ,000             | ,000  |
|                           | 403073303 | ,000             | ,000  |
|                           | 403073651 | ,000             | ,000  |
|                           | 403073771 | ,000             | ,000  |
|                           | 403133102 | ,000             | ,000  |
|                           | 403133106 | ,000             | ,000  |
|                           | 403133107 | ,000             | ,000  |
|                           | 403133109 | ,000             | ,000  |
|                           | 403133202 | ,000             | ,000  |
|                           | 403133203 | 1,000            | ,000  |
|                           | 403133204 | ,000             | 1,000 |
|                           | 403133315 | ,000             | ,000  |
|                           | 403133322 | ,000             | ,000  |
|                           | 403133401 | ,000             | ,000  |
|                           | 403133402 | ,000             | ,000  |
|                           | 403133550 | ,000             | ,000  |
|                           | 403133772 | ,000             | ,000  |
|                           | 403135803 | ,000             | ,000  |
|                           | 404060001 | ,000             | ,000  |
|                           | 404060002 | ,000             | ,000  |
|                           | 404310003 | ,000             | ,000  |
|                           | 404310004 | ,000             | ,000  |
|                           | 502300005 | ,000             | ,000  |
|                           | 502300006 | ,000             | ,000  |
|                           | 502300007 | ,000             | ,000  |
|                           | 502300214 | ,000             | ,000  |
|                           | 502300411 | ,000             | ,000  |
|                           | 502300415 | ,000             | ,000  |
|                           | 502300416 | ,000             | ,000  |
|                           | 502300811 | ,000             | ,000  |
|                           | 502300913 | ,000             | ,000  |
| weekday veckodag          | 1 måndag  |                  |       |
|                           | 2 tisdag  |                  |       |

## Categorical Variables Codings

|                           |           | Parameter coding |       |
|---------------------------|-----------|------------------|-------|
|                           |           | (16)             | (17)  |
| VASTY2 (SAIR*10000)+VASTY | 403073101 | ,000             | ,000  |
|                           | 403073102 | ,000             | ,000  |
|                           | 403073103 | ,000             | ,000  |
|                           | 403073202 | ,000             | ,000  |
|                           | 403073203 | ,000             | ,000  |
|                           | 403073204 | ,000             | ,000  |
|                           | 403073303 | ,000             | ,000  |
|                           | 403073651 | ,000             | ,000  |
|                           | 403073771 | ,000             | ,000  |
|                           | 403133102 | ,000             | ,000  |
|                           | 403133106 | ,000             | ,000  |
|                           | 403133107 | ,000             | ,000  |
|                           | 403133109 | ,000             | ,000  |
|                           | 403133202 | ,000             | ,000  |
|                           | 403133203 | ,000             | ,000  |
|                           | 403133204 | ,000             | ,000  |
|                           | 403133315 | 1,000            | ,000  |
|                           | 403133322 | ,000             | 1,000 |
|                           | 403133401 | ,000             | ,000  |
|                           | 403133402 | ,000             | ,000  |
|                           | 403133550 | ,000             | ,000  |
|                           | 403133772 | ,000             | ,000  |
|                           | 403135803 | ,000             | ,000  |
|                           | 404060001 | ,000             | ,000  |
|                           | 404060002 | ,000             | ,000  |
|                           | 404310003 | ,000             | ,000  |
|                           | 404310004 | ,000             | ,000  |
|                           | 502300005 | ,000             | ,000  |
|                           | 502300006 | ,000             | ,000  |
|                           | 502300007 | ,000             | ,000  |
|                           | 502300214 | ,000             | ,000  |
|                           | 502300411 | ,000             | ,000  |
|                           | 502300415 | ,000             | ,000  |
|                           | 502300416 | ,000             | ,000  |
|                           | 502300811 | ,000             | ,000  |
|                           | 502300913 | ,000             | ,000  |
| weekday veckodag          | 1 måndag  |                  |       |
|                           | 2 tisdag  |                  |       |

## Categorical Variables Codings

|                           |           | Parameter coding |       |
|---------------------------|-----------|------------------|-------|
|                           |           | (18)             | (19)  |
| VASTY2 (SAIR*10000)+VASTY | 403073101 | ,000             | ,000  |
|                           | 403073102 | ,000             | ,000  |
|                           | 403073103 | ,000             | ,000  |
|                           | 403073202 | ,000             | ,000  |
|                           | 403073203 | ,000             | ,000  |
|                           | 403073204 | ,000             | ,000  |
|                           | 403073303 | ,000             | ,000  |
|                           | 403073651 | ,000             | ,000  |
|                           | 403073771 | ,000             | ,000  |
|                           | 403133102 | ,000             | ,000  |
|                           | 403133106 | ,000             | ,000  |
|                           | 403133107 | ,000             | ,000  |
|                           | 403133109 | ,000             | ,000  |
|                           | 403133202 | ,000             | ,000  |
|                           | 403133203 | ,000             | ,000  |
|                           | 403133204 | ,000             | ,000  |
|                           | 403133315 | ,000             | ,000  |
|                           | 403133322 | ,000             | ,000  |
|                           | 403133401 | 1,000            | ,000  |
|                           | 403133402 | ,000             | 1,000 |
|                           | 403133550 | ,000             | ,000  |
|                           | 403133772 | ,000             | ,000  |
|                           | 403135803 | ,000             | ,000  |
|                           | 404060001 | ,000             | ,000  |
|                           | 404060002 | ,000             | ,000  |
|                           | 404310003 | ,000             | ,000  |
|                           | 404310004 | ,000             | ,000  |
|                           | 502300005 | ,000             | ,000  |
|                           | 502300006 | ,000             | ,000  |
|                           | 502300007 | ,000             | ,000  |
|                           | 502300214 | ,000             | ,000  |
|                           | 502300411 | ,000             | ,000  |
|                           | 502300415 | ,000             | ,000  |
|                           | 502300416 | ,000             | ,000  |
|                           | 502300811 | ,000             | ,000  |
|                           | 502300913 | ,000             | ,000  |
| weekday veckodag          | 1 måndag  |                  |       |
|                           | 2 tisdag  |                  |       |

## Categorical Variables Codings

|                           |           | Parameter coding |       |
|---------------------------|-----------|------------------|-------|
|                           |           | (20)             | (21)  |
| VASTY2 (SAIR*10000)+VASTY | 403073101 | ,000             | ,000  |
|                           | 403073102 | ,000             | ,000  |
|                           | 403073103 | ,000             | ,000  |
|                           | 403073202 | ,000             | ,000  |
|                           | 403073203 | ,000             | ,000  |
|                           | 403073204 | ,000             | ,000  |
|                           | 403073303 | ,000             | ,000  |
|                           | 403073651 | ,000             | ,000  |
|                           | 403073771 | ,000             | ,000  |
|                           | 403133102 | ,000             | ,000  |
|                           | 403133106 | ,000             | ,000  |
|                           | 403133107 | ,000             | ,000  |
|                           | 403133109 | ,000             | ,000  |
|                           | 403133202 | ,000             | ,000  |
|                           | 403133203 | ,000             | ,000  |
|                           | 403133204 | ,000             | ,000  |
|                           | 403133315 | ,000             | ,000  |
|                           | 403133322 | ,000             | ,000  |
|                           | 403133401 | ,000             | ,000  |
|                           | 403133402 | ,000             | ,000  |
|                           | 403133550 | 1,000            | ,000  |
|                           | 403133772 | ,000             | 1,000 |
|                           | 403135803 | ,000             | ,000  |
|                           | 404060001 | ,000             | ,000  |
|                           | 404060002 | ,000             | ,000  |
|                           | 404310003 | ,000             | ,000  |
|                           | 404310004 | ,000             | ,000  |
|                           | 502300005 | ,000             | ,000  |
|                           | 502300006 | ,000             | ,000  |
|                           | 502300007 | ,000             | ,000  |
|                           | 502300214 | ,000             | ,000  |
|                           | 502300411 | ,000             | ,000  |
|                           | 502300415 | ,000             | ,000  |
|                           | 502300416 | ,000             | ,000  |
|                           | 502300811 | ,000             | ,000  |
|                           | 502300913 | ,000             | ,000  |
| weekday veckodag          | 1 måndag  |                  |       |
|                           | 2 tisdag  |                  |       |

## Categorical Variables Codings

|                           |           | Parameter coding |       |
|---------------------------|-----------|------------------|-------|
|                           |           | (22)             | (23)  |
| VASTY2 (SAIR*10000)+VASTY | 403073101 | ,000             | ,000  |
|                           | 403073102 | ,000             | ,000  |
|                           | 403073103 | ,000             | ,000  |
|                           | 403073202 | ,000             | ,000  |
|                           | 403073203 | ,000             | ,000  |
|                           | 403073204 | ,000             | ,000  |
|                           | 403073303 | ,000             | ,000  |
|                           | 403073651 | ,000             | ,000  |
|                           | 403073771 | ,000             | ,000  |
|                           | 403133102 | ,000             | ,000  |
|                           | 403133106 | ,000             | ,000  |
|                           | 403133107 | ,000             | ,000  |
|                           | 403133109 | ,000             | ,000  |
|                           | 403133202 | ,000             | ,000  |
|                           | 403133203 | ,000             | ,000  |
|                           | 403133204 | ,000             | ,000  |
|                           | 403133315 | ,000             | ,000  |
|                           | 403133322 | ,000             | ,000  |
|                           | 403133401 | ,000             | ,000  |
|                           | 403133402 | ,000             | ,000  |
|                           | 403133550 | ,000             | ,000  |
|                           | 403133772 | ,000             | ,000  |
|                           | 403135803 | 1,000            | ,000  |
|                           | 404060001 | ,000             | 1,000 |
|                           | 404060002 | ,000             | ,000  |
|                           | 404310003 | ,000             | ,000  |
|                           | 404310004 | ,000             | ,000  |
|                           | 502300005 | ,000             | ,000  |
|                           | 502300006 | ,000             | ,000  |
|                           | 502300007 | ,000             | ,000  |
|                           | 502300214 | ,000             | ,000  |
|                           | 502300411 | ,000             | ,000  |
|                           | 502300415 | ,000             | ,000  |
|                           | 502300416 | ,000             | ,000  |
|                           | 502300811 | ,000             | ,000  |
|                           | 502300913 | ,000             | ,000  |
| weekday veckodag          | 1 måndag  |                  |       |
|                           | 2 tisdag  |                  |       |

## Categorical Variables Codings

|                           |           | Parameter coding |       |
|---------------------------|-----------|------------------|-------|
|                           |           | (24)             | (25)  |
| VASTY2 (SAIR*10000)+VASTY | 403073101 | ,000             | ,000  |
|                           | 403073102 | ,000             | ,000  |
|                           | 403073103 | ,000             | ,000  |
|                           | 403073202 | ,000             | ,000  |
|                           | 403073203 | ,000             | ,000  |
|                           | 403073204 | ,000             | ,000  |
|                           | 403073303 | ,000             | ,000  |
|                           | 403073651 | ,000             | ,000  |
|                           | 403073771 | ,000             | ,000  |
|                           | 403133102 | ,000             | ,000  |
|                           | 403133106 | ,000             | ,000  |
|                           | 403133107 | ,000             | ,000  |
|                           | 403133109 | ,000             | ,000  |
|                           | 403133202 | ,000             | ,000  |
|                           | 403133203 | ,000             | ,000  |
|                           | 403133204 | ,000             | ,000  |
|                           | 403133315 | ,000             | ,000  |
|                           | 403133322 | ,000             | ,000  |
|                           | 403133401 | ,000             | ,000  |
|                           | 403133402 | ,000             | ,000  |
|                           | 403133550 | ,000             | ,000  |
|                           | 403133772 | ,000             | ,000  |
|                           | 403135803 | ,000             | ,000  |
|                           | 404060001 | ,000             | ,000  |
|                           | 404060002 | 1,000            | ,000  |
|                           | 404310003 | ,000             | 1,000 |
|                           | 404310004 | ,000             | ,000  |
|                           | 502300005 | ,000             | ,000  |
|                           | 502300006 | ,000             | ,000  |
|                           | 502300007 | ,000             | ,000  |
|                           | 502300214 | ,000             | ,000  |
|                           | 502300411 | ,000             | ,000  |
|                           | 502300415 | ,000             | ,000  |
|                           | 502300416 | ,000             | ,000  |
|                           | 502300811 | ,000             | ,000  |
|                           | 502300913 | ,000             | ,000  |
| weekday veckodag          | 1 måndag  |                  |       |
|                           | 2 tisdag  |                  |       |

## Categorical Variables Codings

|                           |           | Parameter coding |       |
|---------------------------|-----------|------------------|-------|
|                           |           | (26)             | (27)  |
| VASTY2 (SAIR*10000)+VASTY | 403073101 | ,000             | ,000  |
|                           | 403073102 | ,000             | ,000  |
|                           | 403073103 | ,000             | ,000  |
|                           | 403073202 | ,000             | ,000  |
|                           | 403073203 | ,000             | ,000  |
|                           | 403073204 | ,000             | ,000  |
|                           | 403073303 | ,000             | ,000  |
|                           | 403073651 | ,000             | ,000  |
|                           | 403073771 | ,000             | ,000  |
|                           | 403133102 | ,000             | ,000  |
|                           | 403133106 | ,000             | ,000  |
|                           | 403133107 | ,000             | ,000  |
|                           | 403133109 | ,000             | ,000  |
|                           | 403133202 | ,000             | ,000  |
|                           | 403133203 | ,000             | ,000  |
|                           | 403133204 | ,000             | ,000  |
|                           | 403133315 | ,000             | ,000  |
|                           | 403133322 | ,000             | ,000  |
|                           | 403133401 | ,000             | ,000  |
|                           | 403133402 | ,000             | ,000  |
|                           | 403133550 | ,000             | ,000  |
|                           | 403133772 | ,000             | ,000  |
|                           | 403135803 | ,000             | ,000  |
|                           | 404060001 | ,000             | ,000  |
|                           | 404060002 | ,000             | ,000  |
|                           | 404310003 | ,000             | ,000  |
|                           | 404310004 | 1,000            | ,000  |
|                           | 502300005 | ,000             | 1,000 |
|                           | 502300006 | ,000             | ,000  |
|                           | 502300007 | ,000             | ,000  |
|                           | 502300214 | ,000             | ,000  |
|                           | 502300411 | ,000             | ,000  |
|                           | 502300415 | ,000             | ,000  |
|                           | 502300416 | ,000             | ,000  |
|                           | 502300811 | ,000             | ,000  |
|                           | 502300913 | ,000             | ,000  |
| weekday veckodag          | 1 måndag  |                  |       |
|                           | 2 tisdag  |                  |       |

## Categorical Variables Codings

|                           |           | Parameter coding |       |
|---------------------------|-----------|------------------|-------|
|                           |           | (28)             | (29)  |
| VASTY2 (SAIR*10000)+VASTY | 403073101 | ,000             | ,000  |
|                           | 403073102 | ,000             | ,000  |
|                           | 403073103 | ,000             | ,000  |
|                           | 403073202 | ,000             | ,000  |
|                           | 403073203 | ,000             | ,000  |
|                           | 403073204 | ,000             | ,000  |
|                           | 403073303 | ,000             | ,000  |
|                           | 403073651 | ,000             | ,000  |
|                           | 403073771 | ,000             | ,000  |
|                           | 403133102 | ,000             | ,000  |
|                           | 403133106 | ,000             | ,000  |
|                           | 403133107 | ,000             | ,000  |
|                           | 403133109 | ,000             | ,000  |
|                           | 403133202 | ,000             | ,000  |
|                           | 403133203 | ,000             | ,000  |
|                           | 403133204 | ,000             | ,000  |
|                           | 403133315 | ,000             | ,000  |
|                           | 403133322 | ,000             | ,000  |
|                           | 403133401 | ,000             | ,000  |
|                           | 403133402 | ,000             | ,000  |
|                           | 403133550 | ,000             | ,000  |
|                           | 403133772 | ,000             | ,000  |
|                           | 403135803 | ,000             | ,000  |
|                           | 404060001 | ,000             | ,000  |
|                           | 404060002 | ,000             | ,000  |
|                           | 404310003 | ,000             | ,000  |
|                           | 404310004 | ,000             | ,000  |
|                           | 502300005 | ,000             | ,000  |
|                           | 502300006 | 1,000            | ,000  |
|                           | 502300007 | ,000             | 1,000 |
|                           | 502300214 | ,000             | ,000  |
|                           | 502300411 | ,000             | ,000  |
|                           | 502300415 | ,000             | ,000  |
|                           | 502300416 | ,000             | ,000  |
|                           | 502300811 | ,000             | ,000  |
|                           | 502300913 | ,000             | ,000  |
| weekday veckodag          | 1 måndag  |                  |       |
|                           | 2 tisdag  |                  |       |



## Categorical Variables Codings

|                           |           | Parameter coding |       |
|---------------------------|-----------|------------------|-------|
|                           |           | (30)             | (31)  |
| VASTY2 (SAIR*10000)+VASTY | 403073101 | ,000             | ,000  |
|                           | 403073102 | ,000             | ,000  |
|                           | 403073103 | ,000             | ,000  |
|                           | 403073202 | ,000             | ,000  |
|                           | 403073203 | ,000             | ,000  |
|                           | 403073204 | ,000             | ,000  |
|                           | 403073303 | ,000             | ,000  |
|                           | 403073651 | ,000             | ,000  |
|                           | 403073771 | ,000             | ,000  |
|                           | 403133102 | ,000             | ,000  |
|                           | 403133106 | ,000             | ,000  |
|                           | 403133107 | ,000             | ,000  |
|                           | 403133109 | ,000             | ,000  |
|                           | 403133202 | ,000             | ,000  |
|                           | 403133203 | ,000             | ,000  |
|                           | 403133204 | ,000             | ,000  |
|                           | 403133315 | ,000             | ,000  |
|                           | 403133322 | ,000             | ,000  |
|                           | 403133401 | ,000             | ,000  |
|                           | 403133402 | ,000             | ,000  |
|                           | 403133550 | ,000             | ,000  |
|                           | 403133772 | ,000             | ,000  |
|                           | 403135803 | ,000             | ,000  |
|                           | 404060001 | ,000             | ,000  |
|                           | 404060002 | ,000             | ,000  |
|                           | 404310003 | ,000             | ,000  |
|                           | 404310004 | ,000             | ,000  |
|                           | 502300005 | ,000             | ,000  |
|                           | 502300006 | ,000             | ,000  |
|                           | 502300007 | ,000             | ,000  |
|                           | 502300214 | 1,000            | ,000  |
|                           | 502300411 | ,000             | 1,000 |
|                           | 502300415 | ,000             | ,000  |
|                           | 502300416 | ,000             | ,000  |
|                           | 502300811 | ,000             | ,000  |
|                           | 502300913 | ,000             | ,000  |
| weekday veckodag          | 1 måndag  |                  |       |
|                           | 2 tisdag  |                  |       |

## Categorical Variables Codings

|                           |           | Parameter coding |       |
|---------------------------|-----------|------------------|-------|
|                           |           | (32)             | (33)  |
| VASTY2 (SAIR*10000)+VASTY | 403073101 | ,000             | ,000  |
|                           | 403073102 | ,000             | ,000  |
|                           | 403073103 | ,000             | ,000  |
|                           | 403073202 | ,000             | ,000  |
|                           | 403073203 | ,000             | ,000  |
|                           | 403073204 | ,000             | ,000  |
|                           | 403073303 | ,000             | ,000  |
|                           | 403073651 | ,000             | ,000  |
|                           | 403073771 | ,000             | ,000  |
|                           | 403133102 | ,000             | ,000  |
|                           | 403133106 | ,000             | ,000  |
|                           | 403133107 | ,000             | ,000  |
|                           | 403133109 | ,000             | ,000  |
|                           | 403133202 | ,000             | ,000  |
|                           | 403133203 | ,000             | ,000  |
|                           | 403133204 | ,000             | ,000  |
|                           | 403133315 | ,000             | ,000  |
|                           | 403133322 | ,000             | ,000  |
|                           | 403133401 | ,000             | ,000  |
|                           | 403133402 | ,000             | ,000  |
|                           | 403133550 | ,000             | ,000  |
|                           | 403133772 | ,000             | ,000  |
|                           | 403135803 | ,000             | ,000  |
|                           | 404060001 | ,000             | ,000  |
|                           | 404060002 | ,000             | ,000  |
|                           | 404310003 | ,000             | ,000  |
|                           | 404310004 | ,000             | ,000  |
|                           | 502300005 | ,000             | ,000  |
|                           | 502300006 | ,000             | ,000  |
|                           | 502300007 | ,000             | ,000  |
|                           | 502300214 | ,000             | ,000  |
|                           | 502300411 | ,000             | ,000  |
|                           | 502300415 | 1,000            | ,000  |
|                           | 502300416 | ,000             | 1,000 |
|                           | 502300811 | ,000             | ,000  |
|                           | 502300913 | ,000             | ,000  |
| weekday veckodag          | 1 måndag  |                  |       |
|                           | 2 tisdag  |                  |       |

## Categorical Variables Codings

|                           |           | Parameter coding |       |
|---------------------------|-----------|------------------|-------|
|                           |           | (34)             | (35)  |
| VASTY2 (SAIR*10000)+VASTY | 403073101 | ,000             | ,000  |
|                           | 403073102 | ,000             | ,000  |
|                           | 403073103 | ,000             | ,000  |
|                           | 403073202 | ,000             | ,000  |
|                           | 403073203 | ,000             | ,000  |
|                           | 403073204 | ,000             | ,000  |
|                           | 403073303 | ,000             | ,000  |
|                           | 403073651 | ,000             | ,000  |
|                           | 403073771 | ,000             | ,000  |
|                           | 403133102 | ,000             | ,000  |
|                           | 403133106 | ,000             | ,000  |
|                           | 403133107 | ,000             | ,000  |
|                           | 403133109 | ,000             | ,000  |
|                           | 403133202 | ,000             | ,000  |
|                           | 403133203 | ,000             | ,000  |
|                           | 403133204 | ,000             | ,000  |
|                           | 403133315 | ,000             | ,000  |
|                           | 403133322 | ,000             | ,000  |
|                           | 403133401 | ,000             | ,000  |
|                           | 403133402 | ,000             | ,000  |
|                           | 403133550 | ,000             | ,000  |
|                           | 403133772 | ,000             | ,000  |
|                           | 403135803 | ,000             | ,000  |
|                           | 404060001 | ,000             | ,000  |
|                           | 404060002 | ,000             | ,000  |
|                           | 404310003 | ,000             | ,000  |
|                           | 404310004 | ,000             | ,000  |
|                           | 502300005 | ,000             | ,000  |
|                           | 502300006 | ,000             | ,000  |
|                           | 502300007 | ,000             | ,000  |
|                           | 502300214 | ,000             | ,000  |
|                           | 502300411 | ,000             | ,000  |
|                           | 502300415 | ,000             | ,000  |
|                           | 502300416 | ,000             | ,000  |
|                           | 502300811 | 1,000            | ,000  |
|                           | 502300913 | ,000             | 1,000 |
| weekday veckodag          | 1 måndag  |                  |       |
|                           | 2 tisdag  |                  |       |

## Categorical Variables Codings

|                           |                                         | Frequency | Parameter |
|---------------------------|-----------------------------------------|-----------|-----------|
|                           |                                         |           | (1)       |
|                           | 3 onsdag                                | 1800      | ,000      |
|                           | 4 torsdag                               | 1794      | ,000      |
|                           | 5 fredag                                | 1788      | ,000      |
|                           | 6 lördag                                | 1735      | ,000      |
|                           | 7 söndag                                | 1741      | ,000      |
| season säsong/period      | 1 januari-mars                          | 3182      | ,000      |
|                           | 2 april-maj                             | 2127      | 1,000     |
|                           | 3 juni-augusti                          | 2911      | ,000      |
|                           | 4 september-oktober                     | 2144      | ,000      |
|                           | 5 november-december                     | 2111      | ,000      |
| bv1 belastning vs paoncil | 1 medelbelastning                       | 5380      | ,000      |
|                           | 2 underbelastning                       | 3222      | 1,000     |
|                           | 3 överbelastning                        | 3873      | ,000      |
| holiday större helg       | 1 ingen större helg                     | 12078     | ,000      |
|                           | 2 större helg (påsk/midsommar/julonyår) | 397       | 1,000     |

## Categorical Variables Codings

|                           |                                         | Parameter coding |       |
|---------------------------|-----------------------------------------|------------------|-------|
|                           |                                         | (2)              | (3)   |
|                           | 3 onsdag                                | 1,000            | ,000  |
|                           | 4 torsdag                               | ,000             | 1,000 |
|                           | 5 fredag                                | ,000             | ,000  |
|                           | 6 lördag                                | ,000             | ,000  |
|                           | 7 söndag                                | ,000             | ,000  |
| season säsong/period      | 1 januari-mars                          | ,000             | ,000  |
|                           | 2 april-maj                             | ,000             | ,000  |
|                           | 3 juni-augusti                          | 1,000            | ,000  |
|                           | 4 september-oktober                     | ,000             | 1,000 |
|                           | 5 november-december                     | ,000             | ,000  |
| bv1 belastning vs paoncil | 1 medelbelastning                       | ,000             |       |
|                           | 2 underbelastning                       | ,000             |       |
|                           | 3 överbelastning                        | 1,000            |       |
| holiday större helg       | 1 ingen större helg                     |                  |       |
|                           | 2 större helg (påsk/midsommar/julonyår) |                  |       |

## Categorical Variables Codings

|                           |                                         | Parameter coding |       |
|---------------------------|-----------------------------------------|------------------|-------|
|                           |                                         | (4)              | (5)   |
| season säsong/period      | 3 onsdag                                | ,000             | ,000  |
|                           | 4 torsdag                               | ,000             | ,000  |
|                           | 5 fredag                                | 1,000            | ,000  |
|                           | 6 lördag                                | ,000             | 1,000 |
|                           | 7 söndag                                | ,000             | ,000  |
|                           | 1 januari-mars                          | ,000             |       |
|                           | 2 april-maj                             | ,000             |       |
| bv1 belastning vs paoncil | 3 juni-augusti                          | ,000             |       |
|                           | 4 september-oktober                     | ,000             |       |
|                           | 5 november-december                     | 1,000            |       |
|                           | 1 medelbelastning                       |                  |       |
| holiday större helg       | 2 underbelastning                       |                  |       |
|                           | 3 överbelastning                        |                  |       |
|                           | 1 ingen större helg                     |                  |       |
|                           | 2 större helg (påsk/midsommar/julonyår) |                  |       |

## Categorical Variables Codings

|                           |                                         | Parameter coding |     |
|---------------------------|-----------------------------------------|------------------|-----|
|                           |                                         | (6)              | (7) |
| season säsong/period      | 3 onsdag                                | ,000             |     |
|                           | 4 torsdag                               | ,000             |     |
|                           | 5 fredag                                | ,000             |     |
|                           | 6 lördag                                | ,000             |     |
|                           | 7 söndag                                | 1,000            |     |
|                           | 1 januari-mars                          |                  |     |
|                           | 2 april-maj                             |                  |     |
| bv1 belastning vs paoncil | 3 juni-augusti                          |                  |     |
|                           | 4 september-oktober                     |                  |     |
|                           | 5 november-december                     |                  |     |
|                           | 1 medelbelastning                       |                  |     |
| holiday större helg       | 2 underbelastning                       |                  |     |
|                           | 3 överbelastning                        |                  |     |
|                           | 1 ingen större helg                     |                  |     |
|                           | 2 större helg (påsk/midsommar/julonyår) |                  |     |

## Categorical Variables Codings

|                           |                                         | Parameter coding |     |
|---------------------------|-----------------------------------------|------------------|-----|
|                           |                                         | (8)              | (9) |
|                           | 3 onsdag                                |                  |     |
|                           | 4 torsdag                               |                  |     |
|                           | 5 fredag                                |                  |     |
|                           | 6 lördag                                |                  |     |
|                           | 7 söndag                                |                  |     |
| season säsong/period      | 1 januari-mars                          |                  |     |
|                           | 2 april-maj                             |                  |     |
|                           | 3 juni-augusti                          |                  |     |
|                           | 4 september-oktober                     |                  |     |
|                           | 5 november-december                     |                  |     |
| bv1 belastning vs paencil | 1 medelbelastning                       |                  |     |
|                           | 2 underbelastning                       |                  |     |
|                           | 3 överbelastning                        |                  |     |
| holiday större helg       | 1 ingen större helg                     |                  |     |
|                           | 2 större helg (påsk/midsommar/julonyår) |                  |     |

## Categorical Variables Codings

|                           |                                         | Parameter coding |      |
|---------------------------|-----------------------------------------|------------------|------|
|                           |                                         | (10)             | (11) |
|                           | 3 onsdag                                |                  |      |
|                           | 4 torsdag                               |                  |      |
|                           | 5 fredag                                |                  |      |
|                           | 6 lördag                                |                  |      |
|                           | 7 söndag                                |                  |      |
| season säsong/period      | 1 januari-mars                          |                  |      |
|                           | 2 april-maj                             |                  |      |
|                           | 3 juni-augusti                          |                  |      |
|                           | 4 september-oktober                     |                  |      |
|                           | 5 november-december                     |                  |      |
| bv1 belastning vs paencil | 1 medelbelastning                       |                  |      |
|                           | 2 underbelastning                       |                  |      |
|                           | 3 överbelastning                        |                  |      |
| holiday större helg       | 1 ingen större helg                     |                  |      |
|                           | 2 större helg (påsk/midsommar/julonyår) |                  |      |

1  
2  
3  
4  
5  
6  
7  
8  
9  
10  
11  
12  
13  
14  
15  
16  
17  
18  
19  
20  
21  
22  
23  
24  
25  
26  
27  
28  
29  
30  
31  
32  
33  
34  
35  
36  
37  
38  
39  
40  
41  
42  
43  
44  
45  
46  
47  
48  
49  
50  
51  
52  
53  
54  
55  
56  
57  
58  
59  
60

**Categorical Variables Codings**

|                           |                                         | Parameter coding |      |
|---------------------------|-----------------------------------------|------------------|------|
|                           |                                         | (12)             | (13) |
| season säsong/period      | 3 onsdag                                |                  |      |
|                           | 4 torsdag                               |                  |      |
|                           | 5 fredag                                |                  |      |
|                           | 6 lördag                                |                  |      |
|                           | 7 söndag                                |                  |      |
|                           | 1 januari-mars                          |                  |      |
|                           | 2 april-maj                             |                  |      |
| bv1 belastning vs paencil | 3 juni-augusti                          |                  |      |
|                           | 4 september-oktober                     |                  |      |
|                           | 5 november-december                     |                  |      |
| holiday större helg       | 1 ingen större helg                     |                  |      |
|                           | 2 större helg (påsk/midsommar/julonyår) |                  |      |

**Categorical Variables Codings**

|                           |                                         | Parameter coding |      |
|---------------------------|-----------------------------------------|------------------|------|
|                           |                                         | (14)             | (15) |
| season säsong/period      | 3 onsdag                                |                  |      |
|                           | 4 torsdag                               |                  |      |
|                           | 5 fredag                                |                  |      |
|                           | 6 lördag                                |                  |      |
|                           | 7 söndag                                |                  |      |
|                           | 1 januari-mars                          |                  |      |
|                           | 2 april-maj                             |                  |      |
| bv1 belastning vs paencil | 3 juni-augusti                          |                  |      |
|                           | 4 september-oktober                     |                  |      |
|                           | 5 november-december                     |                  |      |
| holiday större helg       | 1 ingen större helg                     |                  |      |
|                           | 2 större helg (påsk/midsommar/julonyår) |                  |      |

## Categorical Variables Codings

|                           |                                         | Parameter coding |      |
|---------------------------|-----------------------------------------|------------------|------|
|                           |                                         | (16)             | (17) |
| season säsong/period      | 3 onsdag                                |                  |      |
|                           | 4 torsdag                               |                  |      |
|                           | 5 fredag                                |                  |      |
|                           | 6 lördag                                |                  |      |
|                           | 7 söndag                                |                  |      |
|                           | 1 januari-mars                          |                  |      |
|                           | 2 april-maj                             |                  |      |
| bv1 belastning vs paoncil | 3 juni-augusti                          |                  |      |
|                           | 4 september-oktober                     |                  |      |
|                           | 5 november-december                     |                  |      |
| holiday större helg       | 1 ingen större helg                     |                  |      |
|                           | 2 större helg (påsk/midsommar/julonyår) |                  |      |

## Categorical Variables Codings

|                           |                                         | Parameter coding |      |
|---------------------------|-----------------------------------------|------------------|------|
|                           |                                         | (18)             | (19) |
| season säsong/period      | 3 onsdag                                |                  |      |
|                           | 4 torsdag                               |                  |      |
|                           | 5 fredag                                |                  |      |
|                           | 6 lördag                                |                  |      |
|                           | 7 söndag                                |                  |      |
|                           | 1 januari-mars                          |                  |      |
|                           | 2 april-maj                             |                  |      |
| bv1 belastning vs paoncil | 3 juni-augusti                          |                  |      |
|                           | 4 september-oktober                     |                  |      |
|                           | 5 november-december                     |                  |      |
| holiday större helg       | 1 ingen större helg                     |                  |      |
|                           | 2 större helg (påsk/midsommar/julonyår) |                  |      |



1  
2  
3  
4  
5  
6  
7  
8  
9  
10  
11  
12  
13  
14  
15  
16  
17  
18  
19  
20  
21  
22  
23  
24  
25  
26  
27  
28  
29  
30  
31  
32  
33  
34  
35  
36  
37  
38  
39  
40  
41  
42  
43  
44  
45  
46  
47  
48  
49  
50  
51  
52  
53  
54  
55  
56  
57  
58  
59  
60

**Categorical Variables Codings**

|                           |                                         | Parameter coding |      |
|---------------------------|-----------------------------------------|------------------|------|
|                           |                                         | (20)             | (21) |
| season säsong/period      | 3 onsdag                                |                  |      |
|                           | 4 torsdag                               |                  |      |
|                           | 5 fredag                                |                  |      |
|                           | 6 lördag                                |                  |      |
|                           | 7 söndag                                |                  |      |
|                           | 1 januari-mars                          |                  |      |
|                           | 2 april-maj                             |                  |      |
| bv1 belastning vs paoncil | 3 juni-augusti                          |                  |      |
|                           | 4 september-oktober                     |                  |      |
|                           | 5 november-december                     |                  |      |
| holiday större helg       | 1 ingen större helg                     |                  |      |
|                           | 2 större helg (påsk/midsommar/julonyår) |                  |      |

**Categorical Variables Codings**

|                           |                                         | Parameter coding |      |
|---------------------------|-----------------------------------------|------------------|------|
|                           |                                         | (22)             | (23) |
| season säsong/period      | 3 onsdag                                |                  |      |
|                           | 4 torsdag                               |                  |      |
|                           | 5 fredag                                |                  |      |
|                           | 6 lördag                                |                  |      |
|                           | 7 söndag                                |                  |      |
|                           | 1 januari-mars                          |                  |      |
|                           | 2 april-maj                             |                  |      |
| bv1 belastning vs paoncil | 3 juni-augusti                          |                  |      |
|                           | 4 september-oktober                     |                  |      |
|                           | 5 november-december                     |                  |      |
| holiday större helg       | 1 ingen större helg                     |                  |      |
|                           | 2 större helg (påsk/midsommar/julonyår) |                  |      |

## Categorical Variables Codings

|                           |                                         | Parameter coding |      |
|---------------------------|-----------------------------------------|------------------|------|
|                           |                                         | (24)             | (25) |
| season säsong/period      | 3 onsdag                                |                  |      |
|                           | 4 torsdag                               |                  |      |
|                           | 5 fredag                                |                  |      |
|                           | 6 lördag                                |                  |      |
|                           | 7 söndag                                |                  |      |
|                           | 1 januari-mars                          |                  |      |
|                           | 2 april-maj                             |                  |      |
| bv1 belastning vs paoncil | 3 juni-augusti                          |                  |      |
|                           | 4 september-oktober                     |                  |      |
|                           | 5 november-december                     |                  |      |
| holiday större helg       | 1 ingen större helg                     |                  |      |
|                           | 2 större helg (påsk/midsommar/julonyår) |                  |      |

## Categorical Variables Codings

|                           |                                         | Parameter coding |      |
|---------------------------|-----------------------------------------|------------------|------|
|                           |                                         | (26)             | (27) |
| season säsong/period      | 3 onsdag                                |                  |      |
|                           | 4 torsdag                               |                  |      |
|                           | 5 fredag                                |                  |      |
|                           | 6 lördag                                |                  |      |
|                           | 7 söndag                                |                  |      |
|                           | 1 januari-mars                          |                  |      |
|                           | 2 april-maj                             |                  |      |
| bv1 belastning vs paoncil | 3 juni-augusti                          |                  |      |
|                           | 4 september-oktober                     |                  |      |
|                           | 5 november-december                     |                  |      |
| holiday större helg       | 1 ingen större helg                     |                  |      |
|                           | 2 större helg (påsk/midsommar/julonyår) |                  |      |

## Categorical Variables Codings

|                           |                                         | Parameter coding |      |
|---------------------------|-----------------------------------------|------------------|------|
|                           |                                         | (28)             | (29) |
| season säsong/period      | 3 onsdag                                |                  |      |
|                           | 4 torsdag                               |                  |      |
|                           | 5 fredag                                |                  |      |
|                           | 6 lördag                                |                  |      |
|                           | 7 söndag                                |                  |      |
|                           | 1 januari-mars                          |                  |      |
|                           | 2 april-maj                             |                  |      |
| bv1 belastning vs paoncil | 3 juni-augusti                          |                  |      |
|                           | 4 september-oktober                     |                  |      |
|                           | 5 november-december                     |                  |      |
| holiday större helg       | 1 ingen större helg                     |                  |      |
|                           | 2 större helg (påsk/midsommar/julonyår) |                  |      |

## Categorical Variables Codings

|                           |                                         | Parameter coding |      |
|---------------------------|-----------------------------------------|------------------|------|
|                           |                                         | (30)             | (31) |
| season säsong/period      | 3 onsdag                                |                  |      |
|                           | 4 torsdag                               |                  |      |
|                           | 5 fredag                                |                  |      |
|                           | 6 lördag                                |                  |      |
|                           | 7 söndag                                |                  |      |
|                           | 1 januari-mars                          |                  |      |
|                           | 2 april-maj                             |                  |      |
| bv1 belastning vs paoncil | 3 juni-augusti                          |                  |      |
|                           | 4 september-oktober                     |                  |      |
|                           | 5 november-december                     |                  |      |
| holiday större helg       | 1 ingen större helg                     |                  |      |
|                           | 2 större helg (påsk/midsommar/julonyår) |                  |      |

## Categorical Variables Codings

|                           |                                         | Parameter coding |      |
|---------------------------|-----------------------------------------|------------------|------|
|                           |                                         | (32)             | (33) |
| season säsong/period      | 3 onsdag                                |                  |      |
|                           | 4 torsdag                               |                  |      |
|                           | 5 fredag                                |                  |      |
|                           | 6 lördag                                |                  |      |
|                           | 7 söndag                                |                  |      |
|                           | 1 januari-mars                          |                  |      |
|                           | 2 april-maj                             |                  |      |
| bv1 belastning vs paoncil | 3 juni-augusti                          |                  |      |
|                           | 4 september-oktober                     |                  |      |
|                           | 5 november-december                     |                  |      |
| holiday större helg       | 1 ingen större helg                     |                  |      |
|                           | 2 större helg (påsk/midsommar/julonyår) |                  |      |

## Categorical Variables Codings

|                           |                                         | Parameter coding |      |
|---------------------------|-----------------------------------------|------------------|------|
|                           |                                         | (34)             | (35) |
| season säsong/period      | 3 onsdag                                |                  |      |
|                           | 4 torsdag                               |                  |      |
|                           | 5 fredag                                |                  |      |
|                           | 6 lördag                                |                  |      |
|                           | 7 söndag                                |                  |      |
|                           | 1 januari-mars                          |                  |      |
|                           | 2 april-maj                             |                  |      |
| bv1 belastning vs paoncil | 3 juni-augusti                          |                  |      |
|                           | 4 september-oktober                     |                  |      |
|                           | 5 november-december                     |                  |      |
| holiday större helg       | 1 ingen större helg                     |                  |      |
|                           | 2 större helg (påsk/midsommar/julonyår) |                  |      |

**Block 0: Beginning Block**

Classification Table<sup>a,b</sup>

| Observed           |                                |                           | Predicted                 |                      |
|--------------------|--------------------------------|---------------------------|---------------------------|----------------------|
|                    |                                |                           | 0 ingen eller en händelse | 1 mer än en händelse |
| Step 0             | handlt1 händelse larger than 1 | 0 ingen eller en händelse | 12229                     | 0                    |
|                    |                                | 1 mer än en händelse      | 246                       | 0                    |
| Overall Percentage |                                |                           |                           |                      |

Classification Table<sup>a,b</sup>

| Observed           |                                |                           | Predicted          |
|--------------------|--------------------------------|---------------------------|--------------------|
|                    |                                |                           | Percentage Correct |
| Step 0             | handlt1 händelse larger than 1 | 0 ingen eller en händelse | 100,0              |
|                    |                                | 1 mer än en händelse      | ,0                 |
| Overall Percentage |                                |                           | 98,0               |

a. Constant is included in the model.

b. The cut value is ,500

Variables in the Equation

|                 | B      | S.E. | Wald     | df | Sig. | Exp(B) |
|-----------------|--------|------|----------|----|------|--------|
| Step 0 Constant | -3,906 | ,064 | 3679,612 | 1  | ,000 | ,020   |

## Variables not in the Equation

|        |           |            | Score   | df | Sig. |
|--------|-----------|------------|---------|----|------|
| Step 0 | Variables | bv1        | 11,924  | 2  | ,003 |
|        |           | bv1(1)     | 9,129   | 1  | ,003 |
|        |           | bv1(2)     | 7,462   | 1  | ,006 |
|        |           | VASTY2     | 211,294 | 35 | ,000 |
|        |           | VASTY2(1)  | ,109    | 1  | ,741 |
|        |           | VASTY2(2)  | 2,111   | 1  | ,146 |
|        |           | VASTY2(3)  | 5,608   | 1  | ,018 |
|        |           | VASTY2(4)  | ,094    | 1  | ,759 |
|        |           | VASTY2(5)  | 1,981   | 1  | ,159 |
|        |           | VASTY2(6)  | 7,542   | 1  | ,006 |
|        |           | VASTY2(7)  | 3,478   | 1  | ,062 |
|        |           | VASTY2(8)  | ,006    | 1  | ,940 |
|        |           | VASTY2(9)  | ,082    | 1  | ,775 |
|        |           | VASTY2(10) | 36,459  | 1  | ,000 |
|        |           | VASTY2(11) | 27,814  | 1  | ,000 |
|        |           | VASTY2(12) | 2,573   | 1  | ,109 |
|        |           | VASTY2(13) | ,705    | 1  | ,401 |
|        |           | VASTY2(14) | ,209    | 1  | ,647 |
|        |           | VASTY2(15) | ,209    | 1  | ,647 |
|        |           | VASTY2(16) | ,071    | 1  | ,789 |
|        |           | VASTY2(17) | 7,564   | 1  | ,006 |
|        |           | VASTY2(18) | 7,500   | 1  | ,006 |
|        |           | VASTY2(19) | 5,608   | 1  | ,018 |
|        |           | VASTY2(20) | 1,471   | 1  | ,225 |
|        |           | VASTY2(21) | 2,573   | 1  | ,109 |
|        |           | VASTY2(22) | ,474    | 1  | ,491 |
|        |           | VASTY2(23) | 41,219  | 1  | ,000 |
|        |           | VASTY2(24) | 20,216  | 1  | ,000 |
|        |           | VASTY2(25) | ,290    | 1  | ,590 |
|        |           | VASTY2(26) | ,550    | 1  | ,458 |
|        |           | VASTY2(27) | 5,629   | 1  | ,018 |
|        |           | VASTY2(28) | 2,766   | 1  | ,096 |
|        |           | VASTY2(29) | 7,585   | 1  | ,006 |
|        |           | VASTY2(30) | ,089    | 1  | ,765 |
|        |           | VASTY2(31) | 8,820   | 1  | ,003 |
|        |           | VASTY2(32) | ,652    | 1  | ,419 |
|        |           | VASTY2(33) | 1,464   | 1  | ,226 |
|        |           | VASTY2(34) | 5,587   | 1  | ,018 |
|        |           | VASTY2(35) | 7,764   | 1  | ,005 |
|        |           | weekday    | 3,270   | 6  | ,774 |
|        |           | weekday(1) | ,002    | 1  | ,961 |
|        |           | weekday(2) | ,075    | 1  | ,784 |
|        |           | weekday(3) | ,720    | 1  | ,396 |

**Variables not in the Equation**

|                    | Score   | df | Sig. |
|--------------------|---------|----|------|
| weekday(4)         | ,019    | 1  | ,892 |
| weekday(5)         | 2,336   | 1  | ,126 |
| weekday(6)         | ,004    | 1  | ,951 |
| holiday(1)         | 3,138   | 1  | ,076 |
| season             | 6,828   | 4  | ,145 |
| season(1)          | ,483    | 1  | ,487 |
| season(2)          | 3,014   | 1  | ,083 |
| season(3)          | 4,003   | 1  | ,045 |
| season(4)          | ,934    | 1  | ,334 |
| Overall Statistics | 232,253 | 48 | ,000 |

**Block 1: Method = Enter**

**Omnibus Tests of Model Coefficients**

|             | Chi-square | df | Sig. |
|-------------|------------|----|------|
| Step 1 Step | 230,912    | 48 | ,000 |
| Block       | 230,912    | 48 | ,000 |
| Model       | 230,912    | 48 | ,000 |

**Model Summary**

| Step | -2 Log likelihood     | Cox & Snell R Square | Nagelkerke R Square |
|------|-----------------------|----------------------|---------------------|
| 1    | 2187,871 <sup>a</sup> | ,018                 | ,104                |

a. Estimation terminated at iteration number 20 because maximum iterations has been reached. Final solution cannot be found.

**Classification Table<sup>a</sup>**

|                    |                               | Predicted                 |                      |
|--------------------|-------------------------------|---------------------------|----------------------|
|                    |                               | 0 ingen eller en händelse | 1 mer än en händelse |
| Observed           | handt1 händelse larger than 1 | 12229                     | 0                    |
|                    |                               | 246                       | 0                    |
| Overall Percentage |                               |                           |                      |

**Classification Table<sup>a</sup>**

|                    |                               | Predicted          |
|--------------------|-------------------------------|--------------------|
|                    |                               | Percentage Correct |
| Observed           | handt1 händelse larger than 1 | 100,0              |
|                    |                               | ,0                 |
| Overall Percentage |                               | 98,0               |

a. The cut value is ,500

## Variables in the Equation

|                         | B       | S.E.     | Wald    | df | Sig. | Exp(B) |
|-------------------------|---------|----------|---------|----|------|--------|
| Step 1 <sup>a</sup> bv1 |         |          | 8,711   | 2  | ,013 |        |
| bv1(1)                  | -,311   | ,191     | 2,663   | 1  | ,103 | ,732   |
| bv1(2)                  | ,280    | ,154     | 3,329   | 1  | ,068 | 1,324  |
| VASTY2                  |         |          | 120,646 | 35 | ,000 |        |
| VASTY2(1)               | ,470    | ,576     | ,667    | 1  | ,414 | 1,600  |
| VASTY2(2)               | ,745    | ,545     | 1,868   | 1  | ,172 | 2,107  |
| VASTY2(3)               | -1,826  | 1,101    | 2,751   | 1  | ,097 | ,161   |
| VASTY2(4)               | ,314    | ,579     | ,295    | 1  | ,587 | 1,369  |
| VASTY2(5)               | -,507   | ,735     | ,476    | 1  | ,490 | ,602   |
| VASTY2(6)               | -17,050 | 2092,869 | ,000    | 1  | ,993 | ,000   |
| VASTY2(7)               | ,675    | ,546     | 1,529   | 1  | ,216 | 1,964  |
| VASTY2(8)               | ,241    | ,592     | ,166    | 1  | ,684 | 1,272  |
| VASTY2(9)               | ,123    | ,612     | ,040    | 1  | ,841 | 1,130  |
| VASTY2(10)              | 1,492   | ,501     | 8,885   | 1  | ,003 | 4,447  |
| VASTY2(11)              | 1,428   | ,505     | 8,006   | 1  | ,005 | 4,171  |
| VASTY2(12)              | -,615   | ,735     | ,699    | 1  | ,403 | ,541   |
| VASTY2(13)              | -,198   | ,641     | ,095    | 1  | ,758 | ,821   |
| VASTY2(14)              | ,079    | ,612     | ,017    | 1  | ,898 | 1,082  |
| VASTY2(15)              | ,099    | ,611     | ,026    | 1  | ,871 | 1,104  |
| VASTY2(16)              | ,067    | ,739     | ,008    | 1  | ,928 | 1,069  |
| VASTY2(17)              | -16,898 | 2088,855 | ,000    | 1  | ,994 | ,000   |
| VASTY2(18)              | -16,934 | 2097,755 | ,000    | 1  | ,994 | ,000   |
| VASTY2(19)              | -1,378  | 1,105    | 1,554   | 1  | ,212 | ,252   |
| VASTY2(20)              | -,494   | ,737     | ,449    | 1  | ,503 | ,610   |
| VASTY2(21)              | -,576   | ,735     | ,615    | 1  | ,433 | ,562   |
| VASTY2(22)              | ,715    | ,565     | 1,602   | 1  | ,206 | 2,044  |
| VASTY2(23)              | 1,624   | ,498     | 10,618  | 1  | ,001 | 5,072  |
| VASTY2(24)              | 1,190   | ,512     | 5,404   | 1  | ,020 | 3,288  |
| VASTY2(25)              | ,526    | ,592     | ,791    | 1  | ,374 | 1,693  |
| VASTY2(26)              | -,148   | ,677     | ,048    | 1  | ,827 | ,862   |
| VASTY2(27)              | -1,765  | 1,100    | 2,578   | 1  | ,108 | ,171   |
| VASTY2(28)              | -1,334  | 1,100    | 1,469   | 1  | ,225 | ,263   |
| VASTY2(29)              | -17,017 | 2092,198 | ,000    | 1  | ,994 | ,000   |
| VASTY2(30)              | ,383    | ,576     | ,441    | 1  | ,507 | 1,466  |
| VASTY2(31)              | 1,060   | ,525     | 4,081   | 1  | ,043 | 2,886  |
| VASTY2(32)              | ,022    | ,639     | ,001    | 1  | ,973 | 1,022  |
| VASTY2(33)              | -,227   | ,676     | ,113    | 1  | ,737 | ,797   |
| VASTY2(34)              | -1,692  | 1,098    | 2,374   | 1  | ,123 | ,184   |
| VASTY2(35)              | ,910    | ,538     | 2,864   | 1  | ,091 | 2,485  |
| weekday                 |         |          | 2,449   | 6  | ,874 |        |



## Variables in the Equation

|                     |            | 95% C.I. for EXP(B) |        |
|---------------------|------------|---------------------|--------|
|                     |            | Lower               | Upper  |
| Step 1 <sup>a</sup> | bv1        |                     |        |
|                     | bv1(1)     | ,504                | 1,065  |
|                     | bv1(2)     | ,979                | 1,789  |
|                     | VASTY2     |                     |        |
|                     | VASTY2(1)  | ,518                | 4,944  |
|                     | VASTY2(2)  | ,724                | 6,137  |
|                     | VASTY2(3)  | ,019                | 1,393  |
|                     | VASTY2(4)  | ,440                | 4,258  |
|                     | VASTY2(5)  | ,142                | 2,545  |
|                     | VASTY2(6)  | ,000                | .      |
|                     | VASTY2(7)  | ,674                | 5,725  |
|                     | VASTY2(8)  | ,399                | 4,058  |
|                     | VASTY2(9)  | ,340                | 3,755  |
|                     | VASTY2(10) | 1,667               | 11,862 |
|                     | VASTY2(11) | 1,551               | 11,215 |
|                     | VASTY2(12) | ,128                | 2,285  |
|                     | VASTY2(13) | ,234                | 2,883  |
|                     | VASTY2(14) | ,326                | 3,592  |
|                     | VASTY2(15) | ,333                | 3,660  |
|                     | VASTY2(16) | ,251                | 4,551  |
|                     | VASTY2(17) | ,000                | .      |
|                     | VASTY2(18) | ,000                | .      |
|                     | VASTY2(19) | ,029                | 2,199  |
|                     | VASTY2(20) | ,144                | 2,588  |
|                     | VASTY2(21) | ,133                | 2,373  |
|                     | VASTY2(22) | ,676                | 6,186  |
|                     | VASTY2(23) | 1,910               | 13,468 |
|                     | VASTY2(24) | 1,205               | 8,968  |
|                     | VASTY2(25) | ,531                | 5,398  |
|                     | VASTY2(26) | ,229                | 3,252  |
|                     | VASTY2(27) | ,020                | 1,477  |
|                     | VASTY2(28) | ,030                | 2,277  |
|                     | VASTY2(29) | ,000                | .      |
|                     | VASTY2(30) | ,474                | 4,534  |
|                     | VASTY2(31) | 1,032               | 8,073  |
|                     | VASTY2(32) | ,292                | 3,577  |
|                     | VASTY2(33) | ,212                | 3,001  |
|                     | VASTY2(34) | ,021                | 1,585  |
|                     | VASTY2(35) | ,866                | 7,132  |
|                     | weekday    |                     |        |

Variables in the Equation

|            | B      | S.E. | Wald   | df | Sig. | Exp(B) |
|------------|--------|------|--------|----|------|--------|
| weekday(1) | -,122  | ,235 | ,269   | 1  | ,604 | ,885   |
| weekday(2) | -,173  | ,238 | ,525   | 1  | ,469 | ,841   |
| weekday(3) | ,007   | ,229 | ,001   | 1  | ,975 | 1,007  |
| weekday(4) | -,063  | ,235 | ,071   | 1  | ,790 | ,939   |
| weekday(5) | -,335  | ,258 | 1,695  | 1  | ,193 | ,715   |
| weekday(6) | -,086  | ,239 | ,129   | 1  | ,720 | ,918   |
| holiday(1) | -,796  | ,595 | 1,790  | 1  | ,181 | ,451   |
| season     |        |      | 5,283  | 4  | ,259 |        |
| season(1)  | ,084   | ,198 | ,181   | 1  | ,671 | 1,088  |
| season(2)  | -,195  | ,199 | ,952   | 1  | ,329 | ,823   |
| season(3)  | ,245   | ,190 | 1,668  | 1  | ,197 | 1,278  |
| season(4)  | -,100  | ,214 | ,217   | 1  | ,641 | ,905   |
| Constant   | -4,109 | ,491 | 70,152 | 1  | ,000 | ,016   |

Variables in the Equation

|            | 95% C.I. for EXP(B) |       |
|------------|---------------------|-------|
|            | Lower               | Upper |
| weekday(1) | ,559                | 1,403 |
| weekday(2) | ,527                | 1,342 |
| weekday(3) | ,643                | 1,577 |
| weekday(4) | ,593                | 1,489 |
| weekday(5) | ,431                | 1,185 |
| weekday(6) | ,574                | 1,466 |
| holiday(1) | ,140                | 1,448 |
| season     |                     |       |
| season(1)  | ,738                | 1,603 |
| season(2)  | ,557                | 1,217 |
| season(3)  | ,881                | 1,853 |
| season(4)  | ,596                | 1,376 |
| Constant   |                     |       |

a. Variable(s) entered on step 1: bv1, VASTY2, weekday, holiday, season.

```
LOGISTIC REGRESSION VARIABLES handlt1
/METHOD=ENTER bv2 VASTY2 weekday holiday season
/CONTRAST (bv2)=Indicator(1)
/CONTRAST (VASTY2)=Indicator(1)
/CONTRAST (weekday)=Indicator(1)
/CONTRAST (holiday)=Indicator(1)
/CONTRAST (season)=Indicator(1)
/PRINT=CI(95)
/CRITERIA=PIN(0.05) POUT(0.10) ITERATE(20) CUT(0.5).
```

## Logistic Regression

[DataSet6] C:\cWordjan\Rafaela\_VCS\alla\_tillsammans\abo\_bjo\_vasa\_v1.sav

### Case Processing Summary

| Unweighted Cases <sup>a</sup> |                      | N     | Percent |
|-------------------------------|----------------------|-------|---------|
| Selected Cases                | Included in Analysis | 12475 | 100,0   |
|                               | Missing Cases        | 0     | ,0      |
|                               | Total                | 12475 | 100,0   |
| Unselected Cases              |                      | 0     | ,0      |
| Total                         |                      | 12475 | 100,0   |

a. If weight is in effect, see classification table for the total number of cases.

### Dependent Variable Encoding

| Original Value            | Internal Value |
|---------------------------|----------------|
| 0 ingen eller en händelse | 0              |
| 1 mer än en händelse      | 1              |

### Categorical Variables Codings

|                           | Frequency |
|---------------------------|-----------|
| VASTY2 (SAIR*10000)+VASTY | 365       |
| 403073101                 | 362       |
| 403073102                 | 365       |
| 403073103                 | 365       |
| 403073202                 | 365       |
| 403073203                 | 365       |
| 403073204                 | 330       |
| 403073303                 | 364       |
| 403073651                 | 362       |
| 403073771                 | 365       |
| 403133102                 | 341       |
| 403133106                 | 365       |
| 403133107                 | 365       |
| 403133109                 | 365       |
| 403133202                 | 365       |
| 403133203                 | 365       |
| 403133204                 | 365       |
| 403133315                 | 177       |
| 403133322                 | 365       |
| 403133401                 | 362       |
| 403133402                 | 365       |
| 403133550                 | 298       |
| 403133772                 | 365       |
| 403135803                 | 365       |

## Categorical Variables Codings

|                           |           | Parameter |
|---------------------------|-----------|-----------|
|                           |           | (1)       |
| VASTY2 (SAIR*10000)+VASTY | 403073101 | ,000      |
|                           | 403073102 | 1,000     |
|                           | 403073103 | ,000      |
|                           | 403073202 | ,000      |
|                           | 403073203 | ,000      |
|                           | 403073204 | ,000      |
|                           | 403073303 | ,000      |
|                           | 403073651 | ,000      |
|                           | 403073771 | ,000      |
|                           | 403133102 | ,000      |
|                           | 403133106 | ,000      |
|                           | 403133107 | ,000      |
|                           | 403133109 | ,000      |
|                           | 403133202 | ,000      |
|                           | 403133203 | ,000      |
|                           | 403133204 | ,000      |
|                           | 403133315 | ,000      |
|                           | 403133322 | ,000      |
|                           | 403133401 | ,000      |
|                           | 403133402 | ,000      |
|                           | 403133550 | ,000      |
|                           | 403133772 | ,000      |
|                           | 403135803 | ,000      |

1  
2  
3  
4  
5  
6  
7  
8  
9  
10  
11  
12  
13  
14  
15  
16  
17  
18  
19  
20  
21  
22  
23  
24  
25  
26  
27  
28  
29  
30  
31  
32  
33  
34  
35  
36  
37  
38  
39  
40  
41  
42  
43  
44  
45  
46  
47  
48  
49  
50  
51  
52  
53  
54  
55  
56  
57  
58  
59  
60

**Categorical Variables Codings**

|                           |           | Parameter |
|---------------------------|-----------|-----------|
|                           |           | (2)       |
| VASTY2 (SAIR*10000)+VASTY | 403073101 | ,000      |
|                           | 403073102 | ,000      |
|                           | 403073103 | 1,000     |
|                           | 403073202 | ,000      |
|                           | 403073203 | ,000      |
|                           | 403073204 | ,000      |
|                           | 403073303 | ,000      |
|                           | 403073651 | ,000      |
|                           | 403073771 | ,000      |
|                           | 403133102 | ,000      |
|                           | 403133106 | ,000      |
|                           | 403133107 | ,000      |
|                           | 403133109 | ,000      |
|                           | 403133202 | ,000      |
|                           | 403133203 | ,000      |
|                           | 403133204 | ,000      |
|                           | 403133315 | ,000      |
|                           | 403133322 | ,000      |
|                           | 403133401 | ,000      |
|                           | 403133402 | ,000      |
|                           | 403133550 | ,000      |
|                           | 403133772 | ,000      |
|                           | 403135803 | ,000      |

Peer review only

## Categorical Variables Codings

|                           |           | Parameter |
|---------------------------|-----------|-----------|
|                           |           | (3)       |
| VASTY2 (SAIR*10000)+VASTY | 403073101 | ,000      |
|                           | 403073102 | ,000      |
|                           | 403073103 | ,000      |
|                           | 403073202 | 1,000     |
|                           | 403073203 | ,000      |
|                           | 403073204 | ,000      |
|                           | 403073303 | ,000      |
|                           | 403073651 | ,000      |
|                           | 403073771 | ,000      |
|                           | 403133102 | ,000      |
|                           | 403133106 | ,000      |
|                           | 403133107 | ,000      |
|                           | 403133109 | ,000      |
|                           | 403133202 | ,000      |
|                           | 403133203 | ,000      |
|                           | 403133204 | ,000      |
|                           | 403133315 | ,000      |
|                           | 403133322 | ,000      |
|                           | 403133401 | ,000      |
|                           | 403133402 | ,000      |
|                           | 403133550 | ,000      |
|                           | 403133772 | ,000      |
|                           | 403135803 | ,000      |

1  
2  
3  
4  
5  
6  
7  
8  
9  
10  
11  
12  
13  
14  
15  
16  
17  
18  
19  
20  
21  
22  
23  
24  
25  
26  
27  
28  
29  
30  
31  
32  
33  
34  
35  
36  
37  
38  
39  
40  
41  
42  
43  
44  
45  
46  
47  
48  
49  
50  
51  
52  
53  
54  
55  
56  
57  
58  
59  
60

**Categorical Variables Codings**

|                           |           | Parameter |
|---------------------------|-----------|-----------|
|                           |           | (4)       |
| VASTY2 (SAIR*10000)+VASTY | 403073101 | ,000      |
|                           | 403073102 | ,000      |
|                           | 403073103 | ,000      |
|                           | 403073202 | ,000      |
|                           | 403073203 | 1,000     |
|                           | 403073204 | ,000      |
|                           | 403073303 | ,000      |
|                           | 403073651 | ,000      |
|                           | 403073771 | ,000      |
|                           | 403133102 | ,000      |
|                           | 403133106 | ,000      |
|                           | 403133107 | ,000      |
|                           | 403133109 | ,000      |
|                           | 403133202 | ,000      |
|                           | 403133203 | ,000      |
|                           | 403133204 | ,000      |
|                           | 403133315 | ,000      |
|                           | 403133322 | ,000      |
|                           | 403133401 | ,000      |
|                           | 403133402 | ,000      |
|                           | 403133550 | ,000      |
|                           | 403133772 | ,000      |
|                           | 403135803 | ,000      |

Peer review only

## Categorical Variables Codings

|                           |           | Parameter |
|---------------------------|-----------|-----------|
|                           |           | (5)       |
| VASTY2 (SAIR*10000)+VASTY | 403073101 | ,000      |
|                           | 403073102 | ,000      |
|                           | 403073103 | ,000      |
|                           | 403073202 | ,000      |
|                           | 403073203 | ,000      |
|                           | 403073204 | 1,000     |
|                           | 403073303 | ,000      |
|                           | 403073651 | ,000      |
|                           | 403073771 | ,000      |
|                           | 403133102 | ,000      |
|                           | 403133106 | ,000      |
|                           | 403133107 | ,000      |
|                           | 403133109 | ,000      |
|                           | 403133202 | ,000      |
|                           | 403133203 | ,000      |
|                           | 403133204 | ,000      |
|                           | 403133315 | ,000      |
|                           | 403133322 | ,000      |
|                           | 403133401 | ,000      |
|                           | 403133402 | ,000      |
|                           | 403133550 | ,000      |
|                           | 403133772 | ,000      |
|                           | 403135803 | ,000      |



1  
2  
3  
4  
5  
6  
7  
8  
9  
10  
11  
12  
13  
14  
15  
16  
17  
18  
19  
20  
21  
22  
23  
24  
25  
26  
27  
28  
29  
30  
31  
32  
33  
34  
35  
36  
37  
38  
39  
40  
41  
42  
43  
44  
45  
46  
47  
48  
49  
50  
51  
52  
53  
54  
55  
56  
57  
58  
59  
60

**Categorical Variables Codings**

|                           |           | Parameter |
|---------------------------|-----------|-----------|
|                           |           | (6)       |
| VASTY2 (SAIR*10000)+VASTY | 403073101 | ,000      |
|                           | 403073102 | ,000      |
|                           | 403073103 | ,000      |
|                           | 403073202 | ,000      |
|                           | 403073203 | ,000      |
|                           | 403073204 | ,000      |
|                           | 403073303 | 1,000     |
|                           | 403073651 | ,000      |
|                           | 403073771 | ,000      |
|                           | 403133102 | ,000      |
|                           | 403133106 | ,000      |
|                           | 403133107 | ,000      |
|                           | 403133109 | ,000      |
|                           | 403133202 | ,000      |
|                           | 403133203 | ,000      |
|                           | 403133204 | ,000      |
|                           | 403133315 | ,000      |
|                           | 403133322 | ,000      |
|                           | 403133401 | ,000      |
|                           | 403133402 | ,000      |
|                           | 403133550 | ,000      |
|                           | 403133772 | ,000      |
|                           | 403135803 | ,000      |

Peer review only

## Categorical Variables Codings

|                           |           | Parameter |
|---------------------------|-----------|-----------|
|                           |           | (7)       |
| VASTY2 (SAIR*10000)+VASTY | 403073101 | ,000      |
|                           | 403073102 | ,000      |
|                           | 403073103 | ,000      |
|                           | 403073202 | ,000      |
|                           | 403073203 | ,000      |
|                           | 403073204 | ,000      |
|                           | 403073303 | ,000      |
|                           | 403073651 | 1,000     |
|                           | 403073771 | ,000      |
|                           | 403133102 | ,000      |
|                           | 403133106 | ,000      |
|                           | 403133107 | ,000      |
|                           | 403133109 | ,000      |
|                           | 403133202 | ,000      |
|                           | 403133203 | ,000      |
|                           | 403133204 | ,000      |
|                           | 403133315 | ,000      |
|                           | 403133322 | ,000      |
|                           | 403133401 | ,000      |
|                           | 403133402 | ,000      |
|                           | 403133550 | ,000      |
|                           | 403133772 | ,000      |
|                           | 403135803 | ,000      |

1  
2  
3  
4  
5  
6  
7  
8  
9  
10  
11  
12  
13  
14  
15  
16  
17  
18  
19  
20  
21  
22  
23  
24  
25  
26  
27  
28  
29  
30  
31  
32  
33  
34  
35  
36  
37  
38  
39  
40  
41  
42  
43  
44  
45  
46  
47  
48  
49  
50  
51  
52  
53  
54  
55  
56  
57  
58  
59  
60

**Categorical Variables Codings**

|                           |           | Parameter |
|---------------------------|-----------|-----------|
|                           |           | (8)       |
| VASTY2 (SAIR*10000)+VASTY | 403073101 | ,000      |
|                           | 403073102 | ,000      |
|                           | 403073103 | ,000      |
|                           | 403073202 | ,000      |
|                           | 403073203 | ,000      |
|                           | 403073204 | ,000      |
|                           | 403073303 | ,000      |
|                           | 403073651 | ,000      |
|                           | 403073771 | 1,000     |
|                           | 403133102 | ,000      |
|                           | 403133106 | ,000      |
|                           | 403133107 | ,000      |
|                           | 403133109 | ,000      |
|                           | 403133202 | ,000      |
|                           | 403133203 | ,000      |
|                           | 403133204 | ,000      |
|                           | 403133315 | ,000      |
|                           | 403133322 | ,000      |
|                           | 403133401 | ,000      |
|                           | 403133402 | ,000      |
|                           | 403133550 | ,000      |
|                           | 403133772 | ,000      |
|                           | 403135803 | ,000      |

Peer review only

## Categorical Variables Codings

|                           |           | Parameter |
|---------------------------|-----------|-----------|
|                           |           | (9)       |
| VASTY2 (SAIR*10000)+VASTY | 403073101 | ,000      |
|                           | 403073102 | ,000      |
|                           | 403073103 | ,000      |
|                           | 403073202 | ,000      |
|                           | 403073203 | ,000      |
|                           | 403073204 | ,000      |
|                           | 403073303 | ,000      |
|                           | 403073651 | ,000      |
|                           | 403073771 | ,000      |
|                           | 403133102 | 1,000     |
|                           | 403133106 | ,000      |
|                           | 403133107 | ,000      |
|                           | 403133109 | ,000      |
|                           | 403133202 | ,000      |
|                           | 403133203 | ,000      |
|                           | 403133204 | ,000      |
|                           | 403133315 | ,000      |
|                           | 403133322 | ,000      |
|                           | 403133401 | ,000      |
|                           | 403133402 | ,000      |
|                           | 403133550 | ,000      |
|                           | 403133772 | ,000      |
|                           | 403135803 | ,000      |

1  
2  
3  
4  
5  
6  
7  
8  
9  
10  
11  
12  
13  
14  
15  
16  
17  
18  
19  
20  
21  
22  
23  
24  
25  
26  
27  
28  
29  
30  
31  
32  
33  
34  
35  
36  
37  
38  
39  
40  
41  
42  
43  
44  
45  
46  
47  
48  
49  
50  
51  
52  
53  
54  
55  
56  
57  
58  
59  
60

**Categorical Variables Codings**

|                           |           | Parameter |
|---------------------------|-----------|-----------|
|                           |           | (10)      |
| VASTY2 (SAIR*10000)+VASTY | 403073101 | ,000      |
|                           | 403073102 | ,000      |
|                           | 403073103 | ,000      |
|                           | 403073202 | ,000      |
|                           | 403073203 | ,000      |
|                           | 403073204 | ,000      |
|                           | 403073303 | ,000      |
|                           | 403073651 | ,000      |
|                           | 403073771 | ,000      |
|                           | 403133102 | ,000      |
|                           | 403133106 | 1,000     |
|                           | 403133107 | ,000      |
|                           | 403133109 | ,000      |
|                           | 403133202 | ,000      |
|                           | 403133203 | ,000      |
|                           | 403133204 | ,000      |
|                           | 403133315 | ,000      |
|                           | 403133322 | ,000      |
|                           | 403133401 | ,000      |
|                           | 403133402 | ,000      |
|                           | 403133550 | ,000      |
|                           | 403133772 | ,000      |
|                           | 403135803 | ,000      |

Peer review only

## Categorical Variables Codings

|                           |           | Parameter |
|---------------------------|-----------|-----------|
|                           |           | (1)       |
| VASTY2 (SAIR*10000)+VASTY | 403073101 | ,000      |
|                           | 403073102 | ,000      |
|                           | 403073103 | ,000      |
|                           | 403073202 | ,000      |
|                           | 403073203 | ,000      |
|                           | 403073204 | ,000      |
|                           | 403073303 | ,000      |
|                           | 403073651 | ,000      |
|                           | 403073771 | ,000      |
|                           | 403133102 | ,000      |
|                           | 403133106 | ,000      |
|                           | 403133107 | 1,000     |
|                           | 403133109 | ,000      |
|                           | 403133202 | ,000      |
|                           | 403133203 | ,000      |
|                           | 403133204 | ,000      |
|                           | 403133315 | ,000      |
|                           | 403133322 | ,000      |
|                           | 403133401 | ,000      |
|                           | 403133402 | ,000      |
|                           | 403133550 | ,000      |
|                           | 403133772 | ,000      |
|                           | 403135803 | ,000      |

1  
2  
3  
4  
5  
6  
7  
8  
9  
10  
11  
12  
13  
14  
15  
16  
17  
18  
19  
20  
21  
22  
23  
24  
25  
26  
27  
28  
29  
30  
31  
32  
33  
34  
35  
36  
37  
38  
39  
40  
41  
42  
43  
44  
45  
46  
47  
48  
49  
50  
51  
52  
53  
54  
55  
56  
57  
58  
59  
60

**Categorical Variables Codings**

|                           |           | Parameter |
|---------------------------|-----------|-----------|
|                           |           | (12)      |
| VASTY2 (SAIR*10000)+VASTY | 403073101 | ,000      |
|                           | 403073102 | ,000      |
|                           | 403073103 | ,000      |
|                           | 403073202 | ,000      |
|                           | 403073203 | ,000      |
|                           | 403073204 | ,000      |
|                           | 403073303 | ,000      |
|                           | 403073651 | ,000      |
|                           | 403073771 | ,000      |
|                           | 403133102 | ,000      |
|                           | 403133106 | ,000      |
|                           | 403133107 | ,000      |
|                           | 403133109 | 1,000     |
|                           | 403133202 | ,000      |
|                           | 403133203 | ,000      |
|                           | 403133204 | ,000      |
|                           | 403133315 | ,000      |
|                           | 403133322 | ,000      |
|                           | 403133401 | ,000      |
|                           | 403133402 | ,000      |
|                           | 403133550 | ,000      |
|                           | 403133772 | ,000      |
|                           | 403135803 | ,000      |

Peer review only

## Categorical Variables Codings

|                           |           | Parameter |
|---------------------------|-----------|-----------|
|                           |           | (13)      |
| VASTY2 (SAIR*10000)+VASTY | 403073101 | ,000      |
|                           | 403073102 | ,000      |
|                           | 403073103 | ,000      |
|                           | 403073202 | ,000      |
|                           | 403073203 | ,000      |
|                           | 403073204 | ,000      |
|                           | 403073303 | ,000      |
|                           | 403073651 | ,000      |
|                           | 403073771 | ,000      |
|                           | 403133102 | ,000      |
|                           | 403133106 | ,000      |
|                           | 403133107 | ,000      |
|                           | 403133109 | ,000      |
|                           | 403133202 | 1,000     |
|                           | 403133203 | ,000      |
|                           | 403133204 | ,000      |
|                           | 403133315 | ,000      |
|                           | 403133322 | ,000      |
|                           | 403133401 | ,000      |
|                           | 403133402 | ,000      |
|                           | 403133550 | ,000      |
|                           | 403133772 | ,000      |
|                           | 403135803 | ,000      |



1  
2  
3  
4  
5  
6  
7  
8  
9  
10  
11  
12  
13  
14  
15  
16  
17  
18  
19  
20  
21  
22  
23  
24  
25  
26  
27  
28  
29  
30  
31  
32  
33  
34  
35  
36  
37  
38  
39  
40  
41  
42  
43  
44  
45  
46  
47  
48  
49  
50  
51  
52  
53  
54  
55  
56  
57  
58  
59  
60

**Categorical Variables Codings**

|                           |           | Parameter |
|---------------------------|-----------|-----------|
|                           |           | (14)      |
| VASTY2 (SAIR*10000)+VASTY | 403073101 | ,000      |
|                           | 403073102 | ,000      |
|                           | 403073103 | ,000      |
|                           | 403073202 | ,000      |
|                           | 403073203 | ,000      |
|                           | 403073204 | ,000      |
|                           | 403073303 | ,000      |
|                           | 403073651 | ,000      |
|                           | 403073771 | ,000      |
|                           | 403133102 | ,000      |
|                           | 403133106 | ,000      |
|                           | 403133107 | ,000      |
|                           | 403133109 | ,000      |
|                           | 403133202 | ,000      |
|                           | 403133203 | 1,000     |
|                           | 403133204 | ,000      |
|                           | 403133315 | ,000      |
|                           | 403133322 | ,000      |
|                           | 403133401 | ,000      |
|                           | 403133402 | ,000      |
|                           | 403133550 | ,000      |
|                           | 403133772 | ,000      |
|                           | 403135803 | ,000      |

Peer Review Only

## Categorical Variables Codings

|                           |           | Parameter |
|---------------------------|-----------|-----------|
|                           |           | (15)      |
| VASTY2 (SAIR*10000)+VASTY | 403073101 | ,000      |
|                           | 403073102 | ,000      |
|                           | 403073103 | ,000      |
|                           | 403073202 | ,000      |
|                           | 403073203 | ,000      |
|                           | 403073204 | ,000      |
|                           | 403073303 | ,000      |
|                           | 403073651 | ,000      |
|                           | 403073771 | ,000      |
|                           | 403133102 | ,000      |
|                           | 403133106 | ,000      |
|                           | 403133107 | ,000      |
|                           | 403133109 | ,000      |
|                           | 403133202 | ,000      |
|                           | 403133203 | ,000      |
|                           | 403133204 | 1,000     |
|                           | 403133315 | ,000      |
|                           | 403133322 | ,000      |
|                           | 403133401 | ,000      |
|                           | 403133402 | ,000      |
|                           | 403133550 | ,000      |
|                           | 403133772 | ,000      |
|                           | 403135803 | ,000      |

1  
2  
3  
4  
5  
6  
7  
8  
9  
10  
11  
12  
13  
14  
15  
16  
17  
18  
19  
20  
21  
22  
23  
24  
25  
26  
27  
28  
29  
30  
31  
32  
33  
34  
35  
36  
37  
38  
39  
40  
41  
42  
43  
44  
45  
46  
47  
48  
49  
50  
51  
52  
53  
54  
55  
56  
57  
58  
59  
60

**Categorical Variables Codings**

|                           |           | Parameter |
|---------------------------|-----------|-----------|
|                           |           | (16)      |
| VASTY2 (SAIR*10000)+VASTY | 403073101 | ,000      |
|                           | 403073102 | ,000      |
|                           | 403073103 | ,000      |
|                           | 403073202 | ,000      |
|                           | 403073203 | ,000      |
|                           | 403073204 | ,000      |
|                           | 403073303 | ,000      |
|                           | 403073651 | ,000      |
|                           | 403073771 | ,000      |
|                           | 403133102 | ,000      |
|                           | 403133106 | ,000      |
|                           | 403133107 | ,000      |
|                           | 403133109 | ,000      |
|                           | 403133202 | ,000      |
|                           | 403133203 | ,000      |
|                           | 403133204 | ,000      |
|                           | 403133315 | 1,000     |
|                           | 403133322 | ,000      |
|                           | 403133401 | ,000      |
|                           | 403133402 | ,000      |
|                           | 403133550 | ,000      |
|                           | 403133772 | ,000      |
|                           | 403135803 | ,000      |

Peer review only

## Categorical Variables Codings

|                           |           | Parameter |
|---------------------------|-----------|-----------|
|                           |           | (17)      |
| VASTY2 (SAIR*10000)+VASTY | 403073101 | ,000      |
|                           | 403073102 | ,000      |
|                           | 403073103 | ,000      |
|                           | 403073202 | ,000      |
|                           | 403073203 | ,000      |
|                           | 403073204 | ,000      |
|                           | 403073303 | ,000      |
|                           | 403073651 | ,000      |
|                           | 403073771 | ,000      |
|                           | 403133102 | ,000      |
|                           | 403133106 | ,000      |
|                           | 403133107 | ,000      |
|                           | 403133109 | ,000      |
|                           | 403133202 | ,000      |
|                           | 403133203 | ,000      |
|                           | 403133204 | ,000      |
|                           | 403133315 | ,000      |
|                           | 403133322 | 1,000     |
|                           | 403133401 | ,000      |
|                           | 403133402 | ,000      |
|                           | 403133550 | ,000      |
|                           | 403133772 | ,000      |
|                           | 403135803 | ,000      |

## Categorical Variables Codings

|                           |           | Parameter |
|---------------------------|-----------|-----------|
|                           |           | (18)      |
| VASTY2 (SAIR*10000)+VASTY | 403073101 | ,000      |
|                           | 403073102 | ,000      |
|                           | 403073103 | ,000      |
|                           | 403073202 | ,000      |
|                           | 403073203 | ,000      |
|                           | 403073204 | ,000      |
|                           | 403073303 | ,000      |
|                           | 403073651 | ,000      |
|                           | 403073771 | ,000      |
|                           | 403133102 | ,000      |
|                           | 403133106 | ,000      |
|                           | 403133107 | ,000      |
|                           | 403133109 | ,000      |
|                           | 403133202 | ,000      |
|                           | 403133203 | ,000      |
|                           | 403133204 | ,000      |
|                           | 403133315 | ,000      |
|                           | 403133322 | ,000      |
|                           | 403133401 | 1,000     |
|                           | 403133402 | ,000      |
|                           | 403133550 | ,000      |
|                           | 403133772 | ,000      |
|                           | 403135803 | ,000      |

## Categorical Variables Codings

|                           |           | Parameter |
|---------------------------|-----------|-----------|
|                           |           | (19)      |
| VASTY2 (SAIR*10000)+VASTY | 403073101 | ,000      |
|                           | 403073102 | ,000      |
|                           | 403073103 | ,000      |
|                           | 403073202 | ,000      |
|                           | 403073203 | ,000      |
|                           | 403073204 | ,000      |
|                           | 403073303 | ,000      |
|                           | 403073651 | ,000      |
|                           | 403073771 | ,000      |
|                           | 403133102 | ,000      |
|                           | 403133106 | ,000      |
|                           | 403133107 | ,000      |
|                           | 403133109 | ,000      |
|                           | 403133202 | ,000      |
|                           | 403133203 | ,000      |
|                           | 403133204 | ,000      |
|                           | 403133315 | ,000      |
|                           | 403133322 | ,000      |
|                           | 403133401 | ,000      |
|                           | 403133402 | 1,000     |
|                           | 403133550 | ,000      |
|                           | 403133772 | ,000      |
|                           | 403135803 | ,000      |

## Categorical Variables Codings

|                           |           | Parameter |
|---------------------------|-----------|-----------|
|                           |           | (20)      |
| VASTY2 (SAIR*10000)+VASTY | 403073101 | ,000      |
|                           | 403073102 | ,000      |
|                           | 403073103 | ,000      |
|                           | 403073202 | ,000      |
|                           | 403073203 | ,000      |
|                           | 403073204 | ,000      |
|                           | 403073303 | ,000      |
|                           | 403073651 | ,000      |
|                           | 403073771 | ,000      |
|                           | 403133102 | ,000      |
|                           | 403133106 | ,000      |
|                           | 403133107 | ,000      |
|                           | 403133109 | ,000      |
|                           | 403133202 | ,000      |
|                           | 403133203 | ,000      |
|                           | 403133204 | ,000      |
|                           | 403133315 | ,000      |
|                           | 403133322 | ,000      |
|                           | 403133401 | ,000      |
|                           | 403133402 | ,000      |
|                           | 403133550 | 1,000     |
|                           | 403133772 | ,000      |
|                           | 403135803 | ,000      |

## Categorical Variables Codings

|                           |           | Parameter |
|---------------------------|-----------|-----------|
|                           |           | (21)      |
| VASTY2 (SAIR*10000)+VASTY | 403073101 | ,000      |
|                           | 403073102 | ,000      |
|                           | 403073103 | ,000      |
|                           | 403073202 | ,000      |
|                           | 403073203 | ,000      |
|                           | 403073204 | ,000      |
|                           | 403073303 | ,000      |
|                           | 403073651 | ,000      |
|                           | 403073771 | ,000      |
|                           | 403133102 | ,000      |
|                           | 403133106 | ,000      |
|                           | 403133107 | ,000      |
|                           | 403133109 | ,000      |
|                           | 403133202 | ,000      |
|                           | 403133203 | ,000      |
|                           | 403133204 | ,000      |
|                           | 403133315 | ,000      |
|                           | 403133322 | ,000      |
|                           | 403133401 | ,000      |
|                           | 403133402 | ,000      |
|                           | 403133550 | ,000      |
|                           | 403133772 | 1,000     |
|                           | 403135803 | ,000      |



## Categorical Variables Codings

|                           |           | Parameter |
|---------------------------|-----------|-----------|
|                           |           | (22)      |
| VASTY2 (SAIR*10000)+VASTY | 403073101 | ,000      |
|                           | 403073102 | ,000      |
|                           | 403073103 | ,000      |
|                           | 403073202 | ,000      |
|                           | 403073203 | ,000      |
|                           | 403073204 | ,000      |
|                           | 403073303 | ,000      |
|                           | 403073651 | ,000      |
|                           | 403073771 | ,000      |
|                           | 403133102 | ,000      |
|                           | 403133106 | ,000      |
|                           | 403133107 | ,000      |
|                           | 403133109 | ,000      |
|                           | 403133202 | ,000      |
|                           | 403133203 | ,000      |
|                           | 403133204 | ,000      |
|                           | 403133315 | ,000      |
|                           | 403133322 | ,000      |
|                           | 403133401 | ,000      |
|                           | 403133402 | ,000      |
|                           | 403133550 | ,000      |
|                           | 403133772 | ,000      |
|                           | 403135803 | 1,000     |

## Categorical Variables Codings

|                           |           | Parameter |
|---------------------------|-----------|-----------|
|                           |           | (23)      |
| VASTY2 (SAIR*10000)+VASTY | 403073101 | ,000      |
|                           | 403073102 | ,000      |
|                           | 403073103 | ,000      |
|                           | 403073202 | ,000      |
|                           | 403073203 | ,000      |
|                           | 403073204 | ,000      |
|                           | 403073303 | ,000      |
|                           | 403073651 | ,000      |
|                           | 403073771 | ,000      |
|                           | 403133102 | ,000      |
|                           | 403133106 | ,000      |
|                           | 403133107 | ,000      |
|                           | 403133109 | ,000      |
|                           | 403133202 | ,000      |
|                           | 403133203 | ,000      |
|                           | 403133204 | ,000      |
|                           | 403133315 | ,000      |
|                           | 403133322 | ,000      |
|                           | 403133401 | ,000      |
|                           | 403133402 | ,000      |
|                           | 403133550 | ,000      |
|                           | 403133772 | ,000      |
|                           | 403135803 | ,000      |

## Categorical Variables Codings

|                           |           | Parameter |
|---------------------------|-----------|-----------|
|                           |           | (24)      |
| VASTY2 (SAIR*10000)+VASTY | 403073101 | ,000      |
|                           | 403073102 | ,000      |
|                           | 403073103 | ,000      |
|                           | 403073202 | ,000      |
|                           | 403073203 | ,000      |
|                           | 403073204 | ,000      |
|                           | 403073303 | ,000      |
|                           | 403073651 | ,000      |
|                           | 403073771 | ,000      |
|                           | 403133102 | ,000      |
|                           | 403133106 | ,000      |
|                           | 403133107 | ,000      |
|                           | 403133109 | ,000      |
|                           | 403133202 | ,000      |
|                           | 403133203 | ,000      |
|                           | 403133204 | ,000      |
|                           | 403133315 | ,000      |
|                           | 403133322 | ,000      |
|                           | 403133401 | ,000      |
|                           | 403133402 | ,000      |
|                           | 403133550 | ,000      |
|                           | 403133772 | ,000      |
|                           | 403135803 | ,000      |

## Categorical Variables Codings

|                           |           | Parameter |
|---------------------------|-----------|-----------|
|                           |           | (25)      |
| VASTY2 (SAIR*10000)+VASTY | 403073101 | ,000      |
|                           | 403073102 | ,000      |
|                           | 403073103 | ,000      |
|                           | 403073202 | ,000      |
|                           | 403073203 | ,000      |
|                           | 403073204 | ,000      |
|                           | 403073303 | ,000      |
|                           | 403073651 | ,000      |
|                           | 403073771 | ,000      |
|                           | 403133102 | ,000      |
|                           | 403133106 | ,000      |
|                           | 403133107 | ,000      |
|                           | 403133109 | ,000      |
|                           | 403133202 | ,000      |
|                           | 403133203 | ,000      |
|                           | 403133204 | ,000      |
|                           | 403133315 | ,000      |
|                           | 403133322 | ,000      |
|                           | 403133401 | ,000      |
|                           | 403133402 | ,000      |
|                           | 403133550 | ,000      |
|                           | 403133772 | ,000      |
|                           | 403135803 | ,000      |

## Categorical Variables Codings

|                           |           | Parameter |
|---------------------------|-----------|-----------|
|                           |           | (26)      |
| VASTY2 (SAIR*10000)+VASTY | 403073101 | ,000      |
|                           | 403073102 | ,000      |
|                           | 403073103 | ,000      |
|                           | 403073202 | ,000      |
|                           | 403073203 | ,000      |
|                           | 403073204 | ,000      |
|                           | 403073303 | ,000      |
|                           | 403073651 | ,000      |
|                           | 403073771 | ,000      |
|                           | 403133102 | ,000      |
|                           | 403133106 | ,000      |
|                           | 403133107 | ,000      |
|                           | 403133109 | ,000      |
|                           | 403133202 | ,000      |
|                           | 403133203 | ,000      |
|                           | 403133204 | ,000      |
|                           | 403133315 | ,000      |
|                           | 403133322 | ,000      |
|                           | 403133401 | ,000      |
|                           | 403133402 | ,000      |
|                           | 403133550 | ,000      |
|                           | 403133772 | ,000      |
|                           | 403135803 | ,000      |

## Categorical Variables Codings

|                           |           | Parameter |
|---------------------------|-----------|-----------|
|                           |           | (27)      |
| VASTY2 (SAIR*10000)+VASTY | 403073101 | ,000      |
|                           | 403073102 | ,000      |
|                           | 403073103 | ,000      |
|                           | 403073202 | ,000      |
|                           | 403073203 | ,000      |
|                           | 403073204 | ,000      |
|                           | 403073303 | ,000      |
|                           | 403073651 | ,000      |
|                           | 403073771 | ,000      |
|                           | 403133102 | ,000      |
|                           | 403133106 | ,000      |
|                           | 403133107 | ,000      |
|                           | 403133109 | ,000      |
|                           | 403133202 | ,000      |
|                           | 403133203 | ,000      |
|                           | 403133204 | ,000      |
|                           | 403133315 | ,000      |
|                           | 403133322 | ,000      |
|                           | 403133401 | ,000      |
|                           | 403133402 | ,000      |
|                           | 403133550 | ,000      |
|                           | 403133772 | ,000      |
|                           | 403135803 | ,000      |

1  
2  
3  
4  
5  
6  
7  
8  
9  
10  
11  
12  
13  
14  
15  
16  
17  
18  
19  
20  
21  
22  
23  
24  
25  
26  
27  
28  
29  
30  
31  
32  
33  
34  
35  
36  
37  
38  
39  
40  
41  
42  
43  
44  
45  
46  
47  
48  
49  
50  
51  
52  
53  
54  
55  
56  
57  
58  
59  
60

**Categorical Variables Codings**

|                           |           | Parameter |
|---------------------------|-----------|-----------|
|                           |           | (28)      |
| VASTY2 (SAIR*10000)+VASTY | 403073101 | ,000      |
|                           | 403073102 | ,000      |
|                           | 403073103 | ,000      |
|                           | 403073202 | ,000      |
|                           | 403073203 | ,000      |
|                           | 403073204 | ,000      |
|                           | 403073303 | ,000      |
|                           | 403073651 | ,000      |
|                           | 403073771 | ,000      |
|                           | 403133102 | ,000      |
|                           | 403133106 | ,000      |
|                           | 403133107 | ,000      |
|                           | 403133109 | ,000      |
|                           | 403133202 | ,000      |
|                           | 403133203 | ,000      |
|                           | 403133204 | ,000      |
|                           | 403133315 | ,000      |
|                           | 403133322 | ,000      |
|                           | 403133401 | ,000      |
|                           | 403133402 | ,000      |
|                           | 403133550 | ,000      |
|                           | 403133772 | ,000      |
|                           | 403135803 | ,000      |

Peer review only

## Categorical Variables Codings

|                           |           | Parameter |
|---------------------------|-----------|-----------|
|                           |           | (29)      |
| VASTY2 (SAIR*10000)+VASTY | 403073101 | ,000      |
|                           | 403073102 | ,000      |
|                           | 403073103 | ,000      |
|                           | 403073202 | ,000      |
|                           | 403073203 | ,000      |
|                           | 403073204 | ,000      |
|                           | 403073303 | ,000      |
|                           | 403073651 | ,000      |
|                           | 403073771 | ,000      |
|                           | 403133102 | ,000      |
|                           | 403133106 | ,000      |
|                           | 403133107 | ,000      |
|                           | 403133109 | ,000      |
|                           | 403133202 | ,000      |
|                           | 403133203 | ,000      |
|                           | 403133204 | ,000      |
|                           | 403133315 | ,000      |
|                           | 403133322 | ,000      |
|                           | 403133401 | ,000      |
|                           | 403133402 | ,000      |
|                           | 403133550 | ,000      |
|                           | 403133772 | ,000      |
|                           | 403135803 | ,000      |



## Categorical Variables Codings

|                           |           | Parameter |
|---------------------------|-----------|-----------|
|                           |           | (30)      |
| VASTY2 (SAIR*10000)+VASTY | 403073101 | ,000      |
|                           | 403073102 | ,000      |
|                           | 403073103 | ,000      |
|                           | 403073202 | ,000      |
|                           | 403073203 | ,000      |
|                           | 403073204 | ,000      |
|                           | 403073303 | ,000      |
|                           | 403073651 | ,000      |
|                           | 403073771 | ,000      |
|                           | 403133102 | ,000      |
|                           | 403133106 | ,000      |
|                           | 403133107 | ,000      |
|                           | 403133109 | ,000      |
|                           | 403133202 | ,000      |
|                           | 403133203 | ,000      |
|                           | 403133204 | ,000      |
|                           | 403133315 | ,000      |
|                           | 403133322 | ,000      |
|                           | 403133401 | ,000      |
|                           | 403133402 | ,000      |
|                           | 403133550 | ,000      |
|                           | 403133772 | ,000      |
|                           | 403135803 | ,000      |

## Categorical Variables Codings

|                           |           | Parameter |
|---------------------------|-----------|-----------|
|                           |           | (31)      |
| VASTY2 (SAIR*10000)+VASTY | 403073101 | ,000      |
|                           | 403073102 | ,000      |
|                           | 403073103 | ,000      |
|                           | 403073202 | ,000      |
|                           | 403073203 | ,000      |
|                           | 403073204 | ,000      |
|                           | 403073303 | ,000      |
|                           | 403073651 | ,000      |
|                           | 403073771 | ,000      |
|                           | 403133102 | ,000      |
|                           | 403133106 | ,000      |
|                           | 403133107 | ,000      |
|                           | 403133109 | ,000      |
|                           | 403133202 | ,000      |
|                           | 403133203 | ,000      |
|                           | 403133204 | ,000      |
|                           | 403133315 | ,000      |
|                           | 403133322 | ,000      |
|                           | 403133401 | ,000      |
|                           | 403133402 | ,000      |
|                           | 403133550 | ,000      |
|                           | 403133772 | ,000      |
|                           | 403135803 | ,000      |

## Categorical Variables Codings

|                           |           | Parameter |
|---------------------------|-----------|-----------|
|                           |           | (32)      |
| VASTY2 (SAIR*10000)+VASTY | 403073101 | ,000      |
|                           | 403073102 | ,000      |
|                           | 403073103 | ,000      |
|                           | 403073202 | ,000      |
|                           | 403073203 | ,000      |
|                           | 403073204 | ,000      |
|                           | 403073303 | ,000      |
|                           | 403073651 | ,000      |
|                           | 403073771 | ,000      |
|                           | 403133102 | ,000      |
|                           | 403133106 | ,000      |
|                           | 403133107 | ,000      |
|                           | 403133109 | ,000      |
|                           | 403133202 | ,000      |
|                           | 403133203 | ,000      |
|                           | 403133204 | ,000      |
|                           | 403133315 | ,000      |
|                           | 403133322 | ,000      |
|                           | 403133401 | ,000      |
|                           | 403133402 | ,000      |
|                           | 403133550 | ,000      |
|                           | 403133772 | ,000      |
|                           | 403135803 | ,000      |

## Categorical Variables Codings

|                           |           | Parameter |
|---------------------------|-----------|-----------|
|                           |           | (33)      |
| VASTY2 (SAIR*10000)+VASTY | 403073101 | ,000      |
|                           | 403073102 | ,000      |
|                           | 403073103 | ,000      |
|                           | 403073202 | ,000      |
|                           | 403073203 | ,000      |
|                           | 403073204 | ,000      |
|                           | 403073303 | ,000      |
|                           | 403073651 | ,000      |
|                           | 403073771 | ,000      |
|                           | 403133102 | ,000      |
|                           | 403133106 | ,000      |
|                           | 403133107 | ,000      |
|                           | 403133109 | ,000      |
|                           | 403133202 | ,000      |
|                           | 403133203 | ,000      |
|                           | 403133204 | ,000      |
|                           | 403133315 | ,000      |
|                           | 403133322 | ,000      |
|                           | 403133401 | ,000      |
|                           | 403133402 | ,000      |
|                           | 403133550 | ,000      |
|                           | 403133772 | ,000      |
|                           | 403135803 | ,000      |

1  
2  
3  
4  
5  
6  
7  
8  
9  
10  
11  
12  
13  
14  
15  
16  
17  
18  
19  
20  
21  
22  
23  
24  
25  
26  
27  
28  
29  
30  
31  
32  
33  
34  
35  
36  
37  
38  
39  
40  
41  
42  
43  
44  
45  
46  
47  
48  
49  
50  
51  
52  
53  
54  
55  
56  
57  
58  
59  
60

**Categorical Variables Codings**

|                           |           | Parameter |
|---------------------------|-----------|-----------|
|                           |           | (34)      |
| VASTY2 (SAIR*10000)+VASTY | 403073101 | ,000      |
|                           | 403073102 | ,000      |
|                           | 403073103 | ,000      |
|                           | 403073202 | ,000      |
|                           | 403073203 | ,000      |
|                           | 403073204 | ,000      |
|                           | 403073303 | ,000      |
|                           | 403073651 | ,000      |
|                           | 403073771 | ,000      |
|                           | 403133102 | ,000      |
|                           | 403133106 | ,000      |
|                           | 403133107 | ,000      |
|                           | 403133109 | ,000      |
|                           | 403133202 | ,000      |
|                           | 403133203 | ,000      |
|                           | 403133204 | ,000      |
|                           | 403133315 | ,000      |
|                           | 403133322 | ,000      |
|                           | 403133401 | ,000      |
|                           | 403133402 | ,000      |
|                           | 403133550 | ,000      |
|                           | 403133772 | ,000      |
|                           | 403135803 | ,000      |

Peer review only

## Categorical Variables Codings

|                           |           | Paramete... |
|---------------------------|-----------|-------------|
|                           |           | (35)        |
| VASTY2 (SAIR*10000)+VASTY | 403073101 | ,000        |
|                           | 403073102 | ,000        |
|                           | 403073103 | ,000        |
|                           | 403073202 | ,000        |
|                           | 403073203 | ,000        |
|                           | 403073204 | ,000        |
|                           | 403073303 | ,000        |
|                           | 403073651 | ,000        |
|                           | 403073771 | ,000        |
|                           | 403133102 | ,000        |
|                           | 403133106 | ,000        |
|                           | 403133107 | ,000        |
|                           | 403133109 | ,000        |
|                           | 403133202 | ,000        |
|                           | 403133203 | ,000        |
|                           | 403133204 | ,000        |
|                           | 403133315 | ,000        |
|                           | 403133322 | ,000        |
|                           | 403133401 | ,000        |
|                           | 403133402 | ,000        |
|                           | 403133550 | ,000        |
|                           | 403133772 | ,000        |
|                           | 403135803 | ,000        |

## Categorical Variables Codings

|                                             |                                         | Frequency |
|---------------------------------------------|-----------------------------------------|-----------|
|                                             | 404060001                               | 365       |
|                                             | 404060002                               | 366       |
|                                             | 404310003                               | 291       |
|                                             | 404310004                               | 291       |
|                                             | 502300005                               | 366       |
|                                             | 502300006                               | 225       |
|                                             | 502300007                               | 366       |
|                                             | 502300214                               | 366       |
|                                             | 502300411                               | 366       |
|                                             | 502300415                               | 360       |
|                                             | 502300416                               | 363       |
|                                             | 502300811                               | 364       |
|                                             | 502300913                               | 315       |
| weekday veckodag                            | 1 måndag                                | 1805      |
|                                             | 2 tisdag                                | 1812      |
|                                             | 3 onsdag                                | 1800      |
|                                             | 4 torsdag                               | 1794      |
|                                             | 5 fredag                                | 1788      |
|                                             | 6 lördag                                | 1735      |
|                                             | 7 söndag                                | 1741      |
| season säsong/period                        | 1 januari-mars                          | 3182      |
|                                             | 2 april-maj                             | 2127      |
|                                             | 3 juni-augusti                          | 2911      |
|                                             | 4 september-oktober                     | 2144      |
|                                             | 5 november-december                     | 2111      |
| bv2 belastning vs paoncil halva intervallet | 1 medelbelastning                       | 2788      |
|                                             | 2 underbelastning                       | 4419      |
|                                             | 3 överbelastning                        | 5268      |
| holiday större helg                         | 1 ingen större helg                     | 12078     |
|                                             | 2 större helg (påsk/midsommar/julonyår) | 397       |

## Categorical Variables Codings

|                                             |                                         | Parameter |
|---------------------------------------------|-----------------------------------------|-----------|
|                                             |                                         | (1)       |
|                                             | 404060001                               | ,000      |
|                                             | 404060002                               | ,000      |
|                                             | 404310003                               | ,000      |
|                                             | 404310004                               | ,000      |
|                                             | 502300005                               | ,000      |
|                                             | 502300006                               | ,000      |
|                                             | 502300007                               | ,000      |
|                                             | 502300214                               | ,000      |
|                                             | 502300411                               | ,000      |
|                                             | 502300415                               | ,000      |
|                                             | 502300416                               | ,000      |
|                                             | 502300811                               | ,000      |
|                                             | 502300913                               | ,000      |
| weekday veckodag                            | 1 måndag                                | ,000      |
|                                             | 2 tisdag                                | 1,000     |
|                                             | 3 onsdag                                | ,000      |
|                                             | 4 torsdag                               | ,000      |
|                                             | 5 fredag                                | ,000      |
|                                             | 6 lördag                                | ,000      |
|                                             | 7 söndag                                | ,000      |
| season säsong/period                        | 1 januari-mars                          | ,000      |
|                                             | 2 april-maj                             | 1,000     |
|                                             | 3 juni-augusti                          | ,000      |
|                                             | 4 september-oktober                     | ,000      |
|                                             | 5 november-december                     | ,000      |
| bv2 belastning vs paoncil halva intervallet | 1 medelbelastning                       | ,000      |
|                                             | 2 underbelastning                       | 1,000     |
|                                             | 3 överbelastning                        | ,000      |
| holiday större helg                         | 1 ingen större helg                     | ,000      |
|                                             | 2 större helg (påsk/midsommar/julonyår) | 1,000     |



## Categorical Variables Codings

|                                             |                                         | Parameter |
|---------------------------------------------|-----------------------------------------|-----------|
|                                             |                                         | (2)       |
|                                             | 404060001                               | ,000      |
|                                             | 404060002                               | ,000      |
|                                             | 404310003                               | ,000      |
|                                             | 404310004                               | ,000      |
|                                             | 502300005                               | ,000      |
|                                             | 502300006                               | ,000      |
|                                             | 502300007                               | ,000      |
|                                             | 502300214                               | ,000      |
|                                             | 502300411                               | ,000      |
|                                             | 502300415                               | ,000      |
|                                             | 502300416                               | ,000      |
|                                             | 502300811                               | ,000      |
|                                             | 502300913                               | ,000      |
| weekday veckodag                            | 1 måndag                                | ,000      |
|                                             | 2 tisdag                                | ,000      |
|                                             | 3 onsdag                                | 1,000     |
|                                             | 4 torsdag                               | ,000      |
|                                             | 5 fredag                                | ,000      |
|                                             | 6 lördag                                | ,000      |
|                                             | 7 söndag                                | ,000      |
| season säsong/period                        | 1 januari-mars                          | ,000      |
|                                             | 2 april-maj                             | ,000      |
|                                             | 3 juni-augusti                          | 1,000     |
|                                             | 4 september-oktober                     | ,000      |
|                                             | 5 november-december                     | ,000      |
| bv2 belastning vs paoncil halva intervallet | 1 medelbelastning                       | ,000      |
|                                             | 2 underbelastning                       | ,000      |
|                                             | 3 överbelastning                        | 1,000     |
| holiday större helg                         | 1 ingen större helg                     |           |
|                                             | 2 större helg (påsk/midsommar/julonyår) |           |

## Categorical Variables Codings

|                                             |                                         | Parameter |
|---------------------------------------------|-----------------------------------------|-----------|
|                                             |                                         | (3)       |
|                                             | 404060001                               | ,000      |
|                                             | 404060002                               | ,000      |
|                                             | 404310003                               | ,000      |
|                                             | 404310004                               | ,000      |
|                                             | 502300005                               | ,000      |
|                                             | 502300006                               | ,000      |
|                                             | 502300007                               | ,000      |
|                                             | 502300214                               | ,000      |
|                                             | 502300411                               | ,000      |
|                                             | 502300415                               | ,000      |
|                                             | 502300416                               | ,000      |
|                                             | 502300811                               | ,000      |
|                                             | 502300913                               | ,000      |
| weekday veckodag                            | 1 måndag                                | ,000      |
|                                             | 2 tisdag                                | ,000      |
|                                             | 3 onsdag                                | ,000      |
|                                             | 4 torsdag                               | 1,000     |
|                                             | 5 fredag                                | ,000      |
|                                             | 6 lördag                                | ,000      |
|                                             | 7 söndag                                | ,000      |
| season säsong/period                        | 1 januari-mars                          | ,000      |
|                                             | 2 april-maj                             | ,000      |
|                                             | 3 juni-augusti                          | ,000      |
|                                             | 4 september-oktober                     | 1,000     |
|                                             | 5 november-december                     | ,000      |
| bv2 belastning vs paoncil halva intervallet | 1 medelbelastning                       |           |
|                                             | 2 underbelastning                       |           |
|                                             | 3 överbelastning                        |           |
| holiday större helg                         | 1 ingen större helg                     |           |
|                                             | 2 större helg (påsk/midsommar/julonyår) |           |

## Categorical Variables Codings

|                                             |                                         | Parameter |
|---------------------------------------------|-----------------------------------------|-----------|
|                                             |                                         | (4)       |
|                                             | 404060001                               | ,000      |
|                                             | 404060002                               | ,000      |
|                                             | 404310003                               | ,000      |
|                                             | 404310004                               | ,000      |
|                                             | 502300005                               | ,000      |
|                                             | 502300006                               | ,000      |
|                                             | 502300007                               | ,000      |
|                                             | 502300214                               | ,000      |
|                                             | 502300411                               | ,000      |
|                                             | 502300415                               | ,000      |
|                                             | 502300416                               | ,000      |
|                                             | 502300811                               | ,000      |
|                                             | 502300913                               | ,000      |
| weekday veckodag                            | 1 måndag                                | ,000      |
|                                             | 2 tisdag                                | ,000      |
|                                             | 3 onsdag                                | ,000      |
|                                             | 4 torsdag                               | ,000      |
|                                             | 5 fredag                                | 1,000     |
|                                             | 6 lördag                                | ,000      |
|                                             | 7 söndag                                | ,000      |
| season säsong/period                        | 1 januari-mars                          | ,000      |
|                                             | 2 april-maj                             | ,000      |
|                                             | 3 juni-augusti                          | ,000      |
|                                             | 4 september-oktober                     | ,000      |
|                                             | 5 november-december                     | 1,000     |
| bv2 belastning vs paoncil halva intervallet | 1 medelbelastning                       |           |
|                                             | 2 underbelastning                       |           |
|                                             | 3 överbelastning                        |           |
| holiday större helg                         | 1 ingen större helg                     |           |
|                                             | 2 större helg (påsk/midsommar/julonyår) |           |

## Categorical Variables Codings

|                                             |                                         | Parameter |
|---------------------------------------------|-----------------------------------------|-----------|
|                                             |                                         | (5)       |
|                                             | 404060001                               | ,000      |
|                                             | 404060002                               | ,000      |
|                                             | 404310003                               | ,000      |
|                                             | 404310004                               | ,000      |
|                                             | 502300005                               | ,000      |
|                                             | 502300006                               | ,000      |
|                                             | 502300007                               | ,000      |
|                                             | 502300214                               | ,000      |
|                                             | 502300411                               | ,000      |
|                                             | 502300415                               | ,000      |
|                                             | 502300416                               | ,000      |
|                                             | 502300811                               | ,000      |
|                                             | 502300913                               | ,000      |
| weekday veckodag                            | 1 måndag                                | ,000      |
|                                             | 2 tisdag                                | ,000      |
|                                             | 3 onsdag                                | ,000      |
|                                             | 4 torsdag                               | ,000      |
|                                             | 5 fredag                                | ,000      |
|                                             | 6 lördag                                | 1,000     |
|                                             | 7 söndag                                | ,000      |
| season säsong/period                        | 1 januari-mars                          |           |
|                                             | 2 april-maj                             |           |
|                                             | 3 juni-augusti                          |           |
|                                             | 4 september-oktober                     |           |
|                                             | 5 november-december                     |           |
| bv2 belastning vs paoncil halva intervallet | 1 medelbelastning                       |           |
|                                             | 2 underbelastning                       |           |
|                                             | 3 överbelastning                        |           |
| holiday större helg                         | 1 ingen större helg                     |           |
|                                             | 2 större helg (påsk/midsommar/julonyår) |           |

## Categorical Variables Codings

|                                             |                                         | Parameter |
|---------------------------------------------|-----------------------------------------|-----------|
|                                             |                                         | (6)       |
|                                             | 404060001                               | ,000      |
|                                             | 404060002                               | ,000      |
|                                             | 404310003                               | ,000      |
|                                             | 404310004                               | ,000      |
|                                             | 502300005                               | ,000      |
|                                             | 502300006                               | ,000      |
|                                             | 502300007                               | ,000      |
|                                             | 502300214                               | ,000      |
|                                             | 502300411                               | ,000      |
|                                             | 502300415                               | ,000      |
|                                             | 502300416                               | ,000      |
|                                             | 502300811                               | ,000      |
|                                             | 502300913                               | ,000      |
| weekday veckodag                            | 1 måndag                                | ,000      |
|                                             | 2 tisdag                                | ,000      |
|                                             | 3 onsdag                                | ,000      |
|                                             | 4 torsdag                               | ,000      |
|                                             | 5 fredag                                | ,000      |
|                                             | 6 lördag                                | ,000      |
|                                             | 7 söndag                                | 1,000     |
| season säsong/period                        | 1 januari-mars                          |           |
|                                             | 2 april-maj                             |           |
|                                             | 3 juni-augusti                          |           |
|                                             | 4 september-oktober                     |           |
|                                             | 5 november-december                     |           |
| bv2 belastning vs paoncil halva intervallet | 1 medelbelastning                       |           |
|                                             | 2 underbelastning                       |           |
|                                             | 3 överbelastning                        |           |
| holiday större helg                         | 1 ingen större helg                     |           |
|                                             | 2 större helg (påsk/midsommar/julonyår) |           |

## Categorical Variables Codings

|                                             |                                         | Parameter |
|---------------------------------------------|-----------------------------------------|-----------|
|                                             |                                         | (7)       |
|                                             | 404060001                               | ,000      |
|                                             | 404060002                               | ,000      |
|                                             | 404310003                               | ,000      |
|                                             | 404310004                               | ,000      |
|                                             | 502300005                               | ,000      |
|                                             | 502300006                               | ,000      |
|                                             | 502300007                               | ,000      |
|                                             | 502300214                               | ,000      |
|                                             | 502300411                               | ,000      |
|                                             | 502300415                               | ,000      |
|                                             | 502300416                               | ,000      |
|                                             | 502300811                               | ,000      |
|                                             | 502300913                               | ,000      |
| weekday veckodag                            | 1 måndag                                |           |
|                                             | 2 tisdag                                |           |
|                                             | 3 onsdag                                |           |
|                                             | 4 torsdag                               |           |
|                                             | 5 fredag                                |           |
|                                             | 6 lördag                                |           |
|                                             | 7 söndag                                |           |
| season säsong/period                        | 1 januari-mars                          |           |
|                                             | 2 april-maj                             |           |
|                                             | 3 juni-augusti                          |           |
|                                             | 4 september-oktober                     |           |
|                                             | 5 november-december                     |           |
| bv2 belastning vs paoncil halva intervallet | 1 medelbelastning                       |           |
|                                             | 2 underbelastning                       |           |
|                                             | 3 överbelastning                        |           |
| holiday större helg                         | 1 ingen större helg                     |           |
|                                             | 2 större helg (påsk/midsommar/julonyår) |           |

## Categorical Variables Codings

|                                             |                                         | Parameter |
|---------------------------------------------|-----------------------------------------|-----------|
|                                             |                                         | (8)       |
|                                             | 404060001                               | ,000      |
|                                             | 404060002                               | ,000      |
|                                             | 404310003                               | ,000      |
|                                             | 404310004                               | ,000      |
|                                             | 502300005                               | ,000      |
|                                             | 502300006                               | ,000      |
|                                             | 502300007                               | ,000      |
|                                             | 502300214                               | ,000      |
|                                             | 502300411                               | ,000      |
|                                             | 502300415                               | ,000      |
|                                             | 502300416                               | ,000      |
|                                             | 502300811                               | ,000      |
|                                             | 502300913                               | ,000      |
| weekday veckodag                            | 1 måndag                                |           |
|                                             | 2 tisdag                                |           |
|                                             | 3 onsdag                                |           |
|                                             | 4 torsdag                               |           |
|                                             | 5 fredag                                |           |
|                                             | 6 lördag                                |           |
|                                             | 7 söndag                                |           |
| season säsong/period                        | 1 januari-mars                          |           |
|                                             | 2 april-maj                             |           |
|                                             | 3 juni-augusti                          |           |
|                                             | 4 september-oktober                     |           |
|                                             | 5 november-december                     |           |
| bv2 belastning vs paoncil halva intervallet | 1 medelbelastning                       |           |
|                                             | 2 underbelastning                       |           |
|                                             | 3 överbelastning                        |           |
| holiday större helg                         | 1 ingen större helg                     |           |
|                                             | 2 större helg (påsk/midsommar/julonyår) |           |

## Categorical Variables Codings

|                                             |                                         | Parameter |
|---------------------------------------------|-----------------------------------------|-----------|
|                                             |                                         | (9)       |
|                                             | 404060001                               | ,000      |
|                                             | 404060002                               | ,000      |
|                                             | 404310003                               | ,000      |
|                                             | 404310004                               | ,000      |
|                                             | 502300005                               | ,000      |
|                                             | 502300006                               | ,000      |
|                                             | 502300007                               | ,000      |
|                                             | 502300214                               | ,000      |
|                                             | 502300411                               | ,000      |
|                                             | 502300415                               | ,000      |
|                                             | 502300416                               | ,000      |
|                                             | 502300811                               | ,000      |
|                                             | 502300913                               | ,000      |
| weekday veckodag                            | 1 måndag                                |           |
|                                             | 2 tisdag                                |           |
|                                             | 3 onsdag                                |           |
|                                             | 4 torsdag                               |           |
|                                             | 5 fredag                                |           |
|                                             | 6 lördag                                |           |
|                                             | 7 söndag                                |           |
| season säsong/period                        | 1 januari-mars                          |           |
|                                             | 2 april-maj                             |           |
|                                             | 3 juni-augusti                          |           |
|                                             | 4 september-oktober                     |           |
|                                             | 5 november-december                     |           |
| bv2 belastning vs paoncil halva intervallet | 1 medelbelastning                       |           |
|                                             | 2 underbelastning                       |           |
|                                             | 3 överbelastning                        |           |
| holiday större helg                         | 1 ingen större helg                     |           |
|                                             | 2 större helg (påsk/midsommar/julonyår) |           |



## Categorical Variables Codings

|                                             |                                         | Parameter |
|---------------------------------------------|-----------------------------------------|-----------|
|                                             |                                         | (10)      |
|                                             | 404060001                               | ,000      |
|                                             | 404060002                               | ,000      |
|                                             | 404310003                               | ,000      |
|                                             | 404310004                               | ,000      |
|                                             | 502300005                               | ,000      |
|                                             | 502300006                               | ,000      |
|                                             | 502300007                               | ,000      |
|                                             | 502300214                               | ,000      |
|                                             | 502300411                               | ,000      |
|                                             | 502300415                               | ,000      |
|                                             | 502300416                               | ,000      |
|                                             | 502300811                               | ,000      |
|                                             | 502300913                               | ,000      |
| weekday veckodag                            | 1 måndag                                |           |
|                                             | 2 tisdag                                |           |
|                                             | 3 onsdag                                |           |
|                                             | 4 torsdag                               |           |
|                                             | 5 fredag                                |           |
|                                             | 6 lördag                                |           |
|                                             | 7 söndag                                |           |
| season säsong/period                        | 1 januari-mars                          |           |
|                                             | 2 april-maj                             |           |
|                                             | 3 juni-augusti                          |           |
|                                             | 4 september-oktober                     |           |
|                                             | 5 november-december                     |           |
| bv2 belastning vs paoncil halva intervallet | 1 medelbelastning                       |           |
|                                             | 2 underbelastning                       |           |
|                                             | 3 överbelastning                        |           |
| holiday större helg                         | 1 ingen större helg                     |           |
|                                             | 2 större helg (påsk/midsommar/julonyår) |           |

## Categorical Variables Codings

|                                             |                                         | Parameter |
|---------------------------------------------|-----------------------------------------|-----------|
|                                             |                                         | (1)       |
|                                             | 404060001                               | ,000      |
|                                             | 404060002                               | ,000      |
|                                             | 404310003                               | ,000      |
|                                             | 404310004                               | ,000      |
|                                             | 502300005                               | ,000      |
|                                             | 502300006                               | ,000      |
|                                             | 502300007                               | ,000      |
|                                             | 502300214                               | ,000      |
|                                             | 502300411                               | ,000      |
|                                             | 502300415                               | ,000      |
|                                             | 502300416                               | ,000      |
|                                             | 502300811                               | ,000      |
|                                             | 502300913                               | ,000      |
| weekday veckodag                            | 1 måndag                                |           |
|                                             | 2 tisdag                                |           |
|                                             | 3 onsdag                                |           |
|                                             | 4 torsdag                               |           |
|                                             | 5 fredag                                |           |
|                                             | 6 lördag                                |           |
|                                             | 7 söndag                                |           |
| season säsong/period                        | 1 januari-mars                          |           |
|                                             | 2 april-maj                             |           |
|                                             | 3 juni-augusti                          |           |
|                                             | 4 september-oktober                     |           |
|                                             | 5 november-december                     |           |
| bv2 belastning vs paoncil halva intervallet | 1 medelbelastning                       |           |
|                                             | 2 underbelastning                       |           |
|                                             | 3 överbelastning                        |           |
| holiday större helg                         | 1 ingen större helg                     |           |
|                                             | 2 större helg (påsk/midsommar/julonyår) |           |

## Categorical Variables Codings

|                                             |                                         | Parameter |
|---------------------------------------------|-----------------------------------------|-----------|
|                                             |                                         | (12)      |
|                                             | 404060001                               | ,000      |
|                                             | 404060002                               | ,000      |
|                                             | 404310003                               | ,000      |
|                                             | 404310004                               | ,000      |
|                                             | 502300005                               | ,000      |
|                                             | 502300006                               | ,000      |
|                                             | 502300007                               | ,000      |
|                                             | 502300214                               | ,000      |
|                                             | 502300411                               | ,000      |
|                                             | 502300415                               | ,000      |
|                                             | 502300416                               | ,000      |
|                                             | 502300811                               | ,000      |
|                                             | 502300913                               | ,000      |
| weekday veckodag                            | 1 måndag                                |           |
|                                             | 2 tisdag                                |           |
|                                             | 3 onsdag                                |           |
|                                             | 4 torsdag                               |           |
|                                             | 5 fredag                                |           |
|                                             | 6 lördag                                |           |
|                                             | 7 söndag                                |           |
| season säsong/period                        | 1 januari-mars                          |           |
|                                             | 2 april-maj                             |           |
|                                             | 3 juni-augusti                          |           |
|                                             | 4 september-oktober                     |           |
|                                             | 5 november-december                     |           |
| bv2 belastning vs paoncil halva intervallet | 1 medelbelastning                       |           |
|                                             | 2 underbelastning                       |           |
|                                             | 3 överbelastning                        |           |
| holiday större helg                         | 1 ingen större helg                     |           |
|                                             | 2 större helg (påsk/midsommar/julonyår) |           |

## Categorical Variables Codings

|                                             |                                         | Parameter |
|---------------------------------------------|-----------------------------------------|-----------|
|                                             |                                         | (13)      |
|                                             | 404060001                               | ,000      |
|                                             | 404060002                               | ,000      |
|                                             | 404310003                               | ,000      |
|                                             | 404310004                               | ,000      |
|                                             | 502300005                               | ,000      |
|                                             | 502300006                               | ,000      |
|                                             | 502300007                               | ,000      |
|                                             | 502300214                               | ,000      |
|                                             | 502300411                               | ,000      |
|                                             | 502300415                               | ,000      |
|                                             | 502300416                               | ,000      |
|                                             | 502300811                               | ,000      |
|                                             | 502300913                               | ,000      |
| weekday veckodag                            | 1 måndag                                |           |
|                                             | 2 tisdag                                |           |
|                                             | 3 onsdag                                |           |
|                                             | 4 torsdag                               |           |
|                                             | 5 fredag                                |           |
|                                             | 6 lördag                                |           |
|                                             | 7 söndag                                |           |
| season säsong/period                        | 1 januari-mars                          |           |
|                                             | 2 april-maj                             |           |
|                                             | 3 juni-augusti                          |           |
|                                             | 4 september-oktober                     |           |
|                                             | 5 november-december                     |           |
| bv2 belastning vs paoncil halva intervallet | 1 medelbelastning                       |           |
|                                             | 2 underbelastning                       |           |
|                                             | 3 överbelastning                        |           |
| holiday större helg                         | 1 ingen större helg                     |           |
|                                             | 2 större helg (påsk/midsommar/julonyår) |           |

## Categorical Variables Codings

|                                             |                                         | Parameter |
|---------------------------------------------|-----------------------------------------|-----------|
|                                             |                                         | (14)      |
|                                             | 404060001                               | ,000      |
|                                             | 404060002                               | ,000      |
|                                             | 404310003                               | ,000      |
|                                             | 404310004                               | ,000      |
|                                             | 502300005                               | ,000      |
|                                             | 502300006                               | ,000      |
|                                             | 502300007                               | ,000      |
|                                             | 502300214                               | ,000      |
|                                             | 502300411                               | ,000      |
|                                             | 502300415                               | ,000      |
|                                             | 502300416                               | ,000      |
|                                             | 502300811                               | ,000      |
|                                             | 502300913                               | ,000      |
| weekday veckodag                            | 1 måndag                                |           |
|                                             | 2 tisdag                                |           |
|                                             | 3 onsdag                                |           |
|                                             | 4 torsdag                               |           |
|                                             | 5 fredag                                |           |
|                                             | 6 lördag                                |           |
|                                             | 7 söndag                                |           |
| season säsong/period                        | 1 januari-mars                          |           |
|                                             | 2 april-maj                             |           |
|                                             | 3 juni-augusti                          |           |
|                                             | 4 september-oktober                     |           |
|                                             | 5 november-december                     |           |
| bv2 belastning vs paoncil halva intervallet | 1 medelbelastning                       |           |
|                                             | 2 underbelastning                       |           |
|                                             | 3 överbelastning                        |           |
| holiday större helg                         | 1 ingen större helg                     |           |
|                                             | 2 större helg (påsk/midsommar/julonyår) |           |

## Categorical Variables Codings

|                                             |                                         | Parameter |
|---------------------------------------------|-----------------------------------------|-----------|
|                                             |                                         | (15)      |
|                                             | 404060001                               | ,000      |
|                                             | 404060002                               | ,000      |
|                                             | 404310003                               | ,000      |
|                                             | 404310004                               | ,000      |
|                                             | 502300005                               | ,000      |
|                                             | 502300006                               | ,000      |
|                                             | 502300007                               | ,000      |
|                                             | 502300214                               | ,000      |
|                                             | 502300411                               | ,000      |
|                                             | 502300415                               | ,000      |
|                                             | 502300416                               | ,000      |
|                                             | 502300811                               | ,000      |
|                                             | 502300913                               | ,000      |
| weekday veckodag                            | 1 måndag                                |           |
|                                             | 2 tisdag                                |           |
|                                             | 3 onsdag                                |           |
|                                             | 4 torsdag                               |           |
|                                             | 5 fredag                                |           |
|                                             | 6 lördag                                |           |
|                                             | 7 söndag                                |           |
| season säsong/period                        | 1 januari-mars                          |           |
|                                             | 2 april-maj                             |           |
|                                             | 3 juni-augusti                          |           |
|                                             | 4 september-oktober                     |           |
|                                             | 5 november-december                     |           |
| bv2 belastning vs paoncil halva intervallet | 1 medelbelastning                       |           |
|                                             | 2 underbelastning                       |           |
|                                             | 3 överbelastning                        |           |
| holiday större helg                         | 1 ingen större helg                     |           |
|                                             | 2 större helg (påsk/midsommar/julonyår) |           |

## Categorical Variables Codings

|                                             |                                         | Parameter |
|---------------------------------------------|-----------------------------------------|-----------|
|                                             |                                         | (16)      |
|                                             | 404060001                               | ,000      |
|                                             | 404060002                               | ,000      |
|                                             | 404310003                               | ,000      |
|                                             | 404310004                               | ,000      |
|                                             | 502300005                               | ,000      |
|                                             | 502300006                               | ,000      |
|                                             | 502300007                               | ,000      |
|                                             | 502300214                               | ,000      |
|                                             | 502300411                               | ,000      |
|                                             | 502300415                               | ,000      |
|                                             | 502300416                               | ,000      |
|                                             | 502300811                               | ,000      |
|                                             | 502300913                               | ,000      |
| weekday veckodag                            | 1 måndag                                |           |
|                                             | 2 tisdag                                |           |
|                                             | 3 onsdag                                |           |
|                                             | 4 torsdag                               |           |
|                                             | 5 fredag                                |           |
|                                             | 6 lördag                                |           |
|                                             | 7 söndag                                |           |
| season säsong/period                        | 1 januari-mars                          |           |
|                                             | 2 april-maj                             |           |
|                                             | 3 juni-augusti                          |           |
|                                             | 4 september-oktober                     |           |
|                                             | 5 november-december                     |           |
| bv2 belastning vs paoncil halva intervallet | 1 medelbelastning                       |           |
|                                             | 2 underbelastning                       |           |
|                                             | 3 överbelastning                        |           |
| holiday större helg                         | 1 ingen större helg                     |           |
|                                             | 2 större helg (påsk/midsommar/julonyår) |           |

## Categorical Variables Codings

|                                             |                                         | Parameter |
|---------------------------------------------|-----------------------------------------|-----------|
|                                             |                                         | (17)      |
|                                             | 404060001                               | ,000      |
|                                             | 404060002                               | ,000      |
|                                             | 404310003                               | ,000      |
|                                             | 404310004                               | ,000      |
|                                             | 502300005                               | ,000      |
|                                             | 502300006                               | ,000      |
|                                             | 502300007                               | ,000      |
|                                             | 502300214                               | ,000      |
|                                             | 502300411                               | ,000      |
|                                             | 502300415                               | ,000      |
|                                             | 502300416                               | ,000      |
|                                             | 502300811                               | ,000      |
|                                             | 502300913                               | ,000      |
| weekday veckodag                            | 1 måndag                                |           |
|                                             | 2 tisdag                                |           |
|                                             | 3 onsdag                                |           |
|                                             | 4 torsdag                               |           |
|                                             | 5 fredag                                |           |
|                                             | 6 lördag                                |           |
|                                             | 7 söndag                                |           |
| season säsong/period                        | 1 januari-mars                          |           |
|                                             | 2 april-maj                             |           |
|                                             | 3 juni-augusti                          |           |
|                                             | 4 september-oktober                     |           |
|                                             | 5 november-december                     |           |
| bv2 belastning vs paoncil halva intervallet | 1 medelbelastning                       |           |
|                                             | 2 underbelastning                       |           |
|                                             | 3 överbelastning                        |           |
| holiday större helg                         | 1 ingen större helg                     |           |
|                                             | 2 större helg (påsk/midsommar/julonyår) |           |



## Categorical Variables Codings

|                                             |                                         | Parameter |
|---------------------------------------------|-----------------------------------------|-----------|
|                                             |                                         | (18)      |
|                                             | 404060001                               | ,000      |
|                                             | 404060002                               | ,000      |
|                                             | 404310003                               | ,000      |
|                                             | 404310004                               | ,000      |
|                                             | 502300005                               | ,000      |
|                                             | 502300006                               | ,000      |
|                                             | 502300007                               | ,000      |
|                                             | 502300214                               | ,000      |
|                                             | 502300411                               | ,000      |
|                                             | 502300415                               | ,000      |
|                                             | 502300416                               | ,000      |
|                                             | 502300811                               | ,000      |
|                                             | 502300913                               | ,000      |
| weekday veckodag                            | 1 måndag                                |           |
|                                             | 2 tisdag                                |           |
|                                             | 3 onsdag                                |           |
|                                             | 4 torsdag                               |           |
|                                             | 5 fredag                                |           |
|                                             | 6 lördag                                |           |
|                                             | 7 söndag                                |           |
| season säsong/period                        | 1 januari-mars                          |           |
|                                             | 2 april-maj                             |           |
|                                             | 3 juni-augusti                          |           |
|                                             | 4 september-oktober                     |           |
|                                             | 5 november-december                     |           |
| bv2 belastning vs paoncil halva intervallet | 1 medelbelastning                       |           |
|                                             | 2 underbelastning                       |           |
|                                             | 3 överbelastning                        |           |
| holiday större helg                         | 1 ingen större helg                     |           |
|                                             | 2 större helg (påsk/midsommar/julonyår) |           |

## Categorical Variables Codings

|                                             |                                         | Parameter |
|---------------------------------------------|-----------------------------------------|-----------|
|                                             |                                         | (19)      |
|                                             | 404060001                               | ,000      |
|                                             | 404060002                               | ,000      |
|                                             | 404310003                               | ,000      |
|                                             | 404310004                               | ,000      |
|                                             | 502300005                               | ,000      |
|                                             | 502300006                               | ,000      |
|                                             | 502300007                               | ,000      |
|                                             | 502300214                               | ,000      |
|                                             | 502300411                               | ,000      |
|                                             | 502300415                               | ,000      |
|                                             | 502300416                               | ,000      |
|                                             | 502300811                               | ,000      |
|                                             | 502300913                               | ,000      |
| weekday veckodag                            | 1 måndag                                |           |
|                                             | 2 tisdag                                |           |
|                                             | 3 onsdag                                |           |
|                                             | 4 torsdag                               |           |
|                                             | 5 fredag                                |           |
|                                             | 6 lördag                                |           |
|                                             | 7 söndag                                |           |
| season säsong/period                        | 1 januari-mars                          |           |
|                                             | 2 april-maj                             |           |
|                                             | 3 juni-augusti                          |           |
|                                             | 4 september-oktober                     |           |
|                                             | 5 november-december                     |           |
| bv2 belastning vs paoncil halva intervallet | 1 medelbelastning                       |           |
|                                             | 2 underbelastning                       |           |
|                                             | 3 överbelastning                        |           |
| holiday större helg                         | 1 ingen större helg                     |           |
|                                             | 2 större helg (påsk/midsommar/julonyår) |           |

## Categorical Variables Codings

|                                             |                                         | Parameter |
|---------------------------------------------|-----------------------------------------|-----------|
|                                             |                                         | (20)      |
|                                             | 404060001                               | ,000      |
|                                             | 404060002                               | ,000      |
|                                             | 404310003                               | ,000      |
|                                             | 404310004                               | ,000      |
|                                             | 502300005                               | ,000      |
|                                             | 502300006                               | ,000      |
|                                             | 502300007                               | ,000      |
|                                             | 502300214                               | ,000      |
|                                             | 502300411                               | ,000      |
|                                             | 502300415                               | ,000      |
|                                             | 502300416                               | ,000      |
|                                             | 502300811                               | ,000      |
|                                             | 502300913                               | ,000      |
| weekday veckodag                            | 1 måndag                                |           |
|                                             | 2 tisdag                                |           |
|                                             | 3 onsdag                                |           |
|                                             | 4 torsdag                               |           |
|                                             | 5 fredag                                |           |
|                                             | 6 lördag                                |           |
|                                             | 7 söndag                                |           |
| season säsong/period                        | 1 januari-mars                          |           |
|                                             | 2 april-maj                             |           |
|                                             | 3 juni-augusti                          |           |
|                                             | 4 september-oktober                     |           |
|                                             | 5 november-december                     |           |
| bv2 belastning vs paoncil halva intervallet | 1 medelbelastning                       |           |
|                                             | 2 underbelastning                       |           |
|                                             | 3 överbelastning                        |           |
| holiday större helg                         | 1 ingen större helg                     |           |
|                                             | 2 större helg (påsk/midsommar/julonyår) |           |

## Categorical Variables Codings

|                                             |                                         | Parameter |
|---------------------------------------------|-----------------------------------------|-----------|
|                                             |                                         | (21)      |
|                                             | 404060001                               | ,000      |
|                                             | 404060002                               | ,000      |
|                                             | 404310003                               | ,000      |
|                                             | 404310004                               | ,000      |
|                                             | 502300005                               | ,000      |
|                                             | 502300006                               | ,000      |
|                                             | 502300007                               | ,000      |
|                                             | 502300214                               | ,000      |
|                                             | 502300411                               | ,000      |
|                                             | 502300415                               | ,000      |
|                                             | 502300416                               | ,000      |
|                                             | 502300811                               | ,000      |
|                                             | 502300913                               | ,000      |
| weekday veckodag                            | 1 måndag                                |           |
|                                             | 2 tisdag                                |           |
|                                             | 3 onsdag                                |           |
|                                             | 4 torsdag                               |           |
|                                             | 5 fredag                                |           |
|                                             | 6 lördag                                |           |
|                                             | 7 söndag                                |           |
| season säsong/period                        | 1 januari-mars                          |           |
|                                             | 2 april-maj                             |           |
|                                             | 3 juni-augusti                          |           |
|                                             | 4 september-oktober                     |           |
|                                             | 5 november-december                     |           |
| bv2 belastning vs paoncil halva intervallet | 1 medelbelastning                       |           |
|                                             | 2 underbelastning                       |           |
|                                             | 3 överbelastning                        |           |
| holiday större helg                         | 1 ingen större helg                     |           |
|                                             | 2 större helg (påsk/midsommar/julonyår) |           |

## Categorical Variables Codings

|                                             |                                         | Parameter |
|---------------------------------------------|-----------------------------------------|-----------|
|                                             |                                         | (22)      |
|                                             | 404060001                               | ,000      |
|                                             | 404060002                               | ,000      |
|                                             | 404310003                               | ,000      |
|                                             | 404310004                               | ,000      |
|                                             | 502300005                               | ,000      |
|                                             | 502300006                               | ,000      |
|                                             | 502300007                               | ,000      |
|                                             | 502300214                               | ,000      |
|                                             | 502300411                               | ,000      |
|                                             | 502300415                               | ,000      |
|                                             | 502300416                               | ,000      |
|                                             | 502300811                               | ,000      |
|                                             | 502300913                               | ,000      |
| weekday veckodag                            | 1 måndag                                |           |
|                                             | 2 tisdag                                |           |
|                                             | 3 onsdag                                |           |
|                                             | 4 torsdag                               |           |
|                                             | 5 fredag                                |           |
|                                             | 6 lördag                                |           |
|                                             | 7 söndag                                |           |
| season säsong/period                        | 1 januari-mars                          |           |
|                                             | 2 april-maj                             |           |
|                                             | 3 juni-augusti                          |           |
|                                             | 4 september-oktober                     |           |
|                                             | 5 november-december                     |           |
| bv2 belastning vs paoncil halva intervallet | 1 medelbelastning                       |           |
|                                             | 2 underbelastning                       |           |
|                                             | 3 överbelastning                        |           |
| holiday större helg                         | 1 ingen större helg                     |           |
|                                             | 2 större helg (påsk/midsommar/julonyår) |           |

## Categorical Variables Codings

|                                             |                                         | Parameter |
|---------------------------------------------|-----------------------------------------|-----------|
|                                             |                                         | (23)      |
|                                             | 404060001                               | 1,000     |
|                                             | 404060002                               | ,000      |
|                                             | 404310003                               | ,000      |
|                                             | 404310004                               | ,000      |
|                                             | 502300005                               | ,000      |
|                                             | 502300006                               | ,000      |
|                                             | 502300007                               | ,000      |
|                                             | 502300214                               | ,000      |
|                                             | 502300411                               | ,000      |
|                                             | 502300415                               | ,000      |
|                                             | 502300416                               | ,000      |
|                                             | 502300811                               | ,000      |
|                                             | 502300913                               | ,000      |
| weekday veckodag                            | 1 måndag                                |           |
|                                             | 2 tisdag                                |           |
|                                             | 3 onsdag                                |           |
|                                             | 4 torsdag                               |           |
|                                             | 5 fredag                                |           |
|                                             | 6 lördag                                |           |
|                                             | 7 söndag                                |           |
| season säsong/period                        | 1 januari-mars                          |           |
|                                             | 2 april-maj                             |           |
|                                             | 3 juni-augusti                          |           |
|                                             | 4 september-oktober                     |           |
|                                             | 5 november-december                     |           |
| bv2 belastning vs paoncil halva intervallet | 1 medelbelastning                       |           |
|                                             | 2 underbelastning                       |           |
|                                             | 3 överbelastning                        |           |
| holiday större helg                         | 1 ingen större helg                     |           |
|                                             | 2 större helg (påsk/midsommar/julonyår) |           |

## Categorical Variables Codings

|                                             |                                         | Parameter |
|---------------------------------------------|-----------------------------------------|-----------|
|                                             |                                         | (24)      |
|                                             | 404060001                               | ,000      |
|                                             | 404060002                               | 1,000     |
|                                             | 404310003                               | ,000      |
|                                             | 404310004                               | ,000      |
|                                             | 502300005                               | ,000      |
|                                             | 502300006                               | ,000      |
|                                             | 502300007                               | ,000      |
|                                             | 502300214                               | ,000      |
|                                             | 502300411                               | ,000      |
|                                             | 502300415                               | ,000      |
|                                             | 502300416                               | ,000      |
|                                             | 502300811                               | ,000      |
|                                             | 502300913                               | ,000      |
| weekday veckodag                            | 1 måndag                                |           |
|                                             | 2 tisdag                                |           |
|                                             | 3 onsdag                                |           |
|                                             | 4 torsdag                               |           |
|                                             | 5 fredag                                |           |
|                                             | 6 lördag                                |           |
|                                             | 7 söndag                                |           |
| season säsong/period                        | 1 januari-mars                          |           |
|                                             | 2 april-maj                             |           |
|                                             | 3 juni-augusti                          |           |
|                                             | 4 september-oktober                     |           |
|                                             | 5 november-december                     |           |
| bv2 belastning vs paoncil halva intervallet | 1 medelbelastning                       |           |
|                                             | 2 underbelastning                       |           |
|                                             | 3 överbelastning                        |           |
| holiday större helg                         | 1 ingen större helg                     |           |
|                                             | 2 större helg (påsk/midsommar/julonyår) |           |

## Categorical Variables Codings

|                                             |                                         | Parameter |
|---------------------------------------------|-----------------------------------------|-----------|
|                                             |                                         | (25)      |
|                                             | 404060001                               | ,000      |
|                                             | 404060002                               | ,000      |
|                                             | 404310003                               | 1,000     |
|                                             | 404310004                               | ,000      |
|                                             | 502300005                               | ,000      |
|                                             | 502300006                               | ,000      |
|                                             | 502300007                               | ,000      |
|                                             | 502300214                               | ,000      |
|                                             | 502300411                               | ,000      |
|                                             | 502300415                               | ,000      |
|                                             | 502300416                               | ,000      |
|                                             | 502300811                               | ,000      |
|                                             | 502300913                               | ,000      |
| weekday veckodag                            | 1 måndag                                |           |
|                                             | 2 tisdag                                |           |
|                                             | 3 onsdag                                |           |
|                                             | 4 torsdag                               |           |
|                                             | 5 fredag                                |           |
|                                             | 6 lördag                                |           |
|                                             | 7 söndag                                |           |
| season säsong/period                        | 1 januari-mars                          |           |
|                                             | 2 april-maj                             |           |
|                                             | 3 juni-augusti                          |           |
|                                             | 4 september-oktober                     |           |
|                                             | 5 november-december                     |           |
| bv2 belastning vs paoncil halva intervallet | 1 medelbelastning                       |           |
|                                             | 2 underbelastning                       |           |
|                                             | 3 överbelastning                        |           |
| holiday större helg                         | 1 ingen större helg                     |           |
|                                             | 2 större helg (påsk/midsommar/julonyår) |           |



## Categorical Variables Codings

|                                             |                                         | Parameter |
|---------------------------------------------|-----------------------------------------|-----------|
|                                             |                                         | (26)      |
|                                             | 404060001                               | ,000      |
|                                             | 404060002                               | ,000      |
|                                             | 404310003                               | ,000      |
|                                             | 404310004                               | 1,000     |
|                                             | 502300005                               | ,000      |
|                                             | 502300006                               | ,000      |
|                                             | 502300007                               | ,000      |
|                                             | 502300214                               | ,000      |
|                                             | 502300411                               | ,000      |
|                                             | 502300415                               | ,000      |
|                                             | 502300416                               | ,000      |
|                                             | 502300811                               | ,000      |
|                                             | 502300913                               | ,000      |
| weekday veckodag                            | 1 måndag                                |           |
|                                             | 2 tisdag                                |           |
|                                             | 3 onsdag                                |           |
|                                             | 4 torsdag                               |           |
|                                             | 5 fredag                                |           |
|                                             | 6 lördag                                |           |
|                                             | 7 söndag                                |           |
| season säsong/period                        | 1 januari-mars                          |           |
|                                             | 2 april-maj                             |           |
|                                             | 3 juni-augusti                          |           |
|                                             | 4 september-oktober                     |           |
|                                             | 5 november-december                     |           |
| bv2 belastning vs paoncil halva intervallet | 1 medelbelastning                       |           |
|                                             | 2 underbelastning                       |           |
|                                             | 3 överbelastning                        |           |
| holiday större helg                         | 1 ingen större helg                     |           |
|                                             | 2 större helg (påsk/midsommar/julonyår) |           |

## Categorical Variables Codings

|                                             |                                         | Parameter |
|---------------------------------------------|-----------------------------------------|-----------|
|                                             |                                         | (27)      |
|                                             | 404060001                               | ,000      |
|                                             | 404060002                               | ,000      |
|                                             | 404310003                               | ,000      |
|                                             | 404310004                               | ,000      |
|                                             | 502300005                               | 1,000     |
|                                             | 502300006                               | ,000      |
|                                             | 502300007                               | ,000      |
|                                             | 502300214                               | ,000      |
|                                             | 502300411                               | ,000      |
|                                             | 502300415                               | ,000      |
|                                             | 502300416                               | ,000      |
|                                             | 502300811                               | ,000      |
|                                             | 502300913                               | ,000      |
| weekday veckodag                            | 1 måndag                                |           |
|                                             | 2 tisdag                                |           |
|                                             | 3 onsdag                                |           |
|                                             | 4 torsdag                               |           |
|                                             | 5 fredag                                |           |
|                                             | 6 lördag                                |           |
|                                             | 7 söndag                                |           |
| season säsong/period                        | 1 januari-mars                          |           |
|                                             | 2 april-maj                             |           |
|                                             | 3 juni-augusti                          |           |
|                                             | 4 september-oktober                     |           |
|                                             | 5 november-december                     |           |
| bv2 belastning vs paoncil halva intervallet | 1 medelbelastning                       |           |
|                                             | 2 underbelastning                       |           |
|                                             | 3 överbelastning                        |           |
| holiday större helg                         | 1 ingen större helg                     |           |
|                                             | 2 större helg (påsk/midsommar/julonyår) |           |

## Categorical Variables Codings

|                                             |                                         | Parameter |
|---------------------------------------------|-----------------------------------------|-----------|
|                                             |                                         | (28)      |
|                                             | 404060001                               | ,000      |
|                                             | 404060002                               | ,000      |
|                                             | 404310003                               | ,000      |
|                                             | 404310004                               | ,000      |
|                                             | 502300005                               | ,000      |
|                                             | 502300006                               | 1,000     |
|                                             | 502300007                               | ,000      |
|                                             | 502300214                               | ,000      |
|                                             | 502300411                               | ,000      |
|                                             | 502300415                               | ,000      |
|                                             | 502300416                               | ,000      |
|                                             | 502300811                               | ,000      |
|                                             | 502300913                               | ,000      |
| weekday veckodag                            | 1 måndag                                |           |
|                                             | 2 tisdag                                |           |
|                                             | 3 onsdag                                |           |
|                                             | 4 torsdag                               |           |
|                                             | 5 fredag                                |           |
|                                             | 6 lördag                                |           |
|                                             | 7 söndag                                |           |
| season säsong/period                        | 1 januari-mars                          |           |
|                                             | 2 april-maj                             |           |
|                                             | 3 juni-augusti                          |           |
|                                             | 4 september-oktober                     |           |
|                                             | 5 november-december                     |           |
| bv2 belastning vs paoncil halva intervallet | 1 medelbelastning                       |           |
|                                             | 2 underbelastning                       |           |
|                                             | 3 överbelastning                        |           |
| holiday större helg                         | 1 ingen större helg                     |           |
|                                             | 2 större helg (påsk/midsommar/julonyår) |           |

## Categorical Variables Codings

|                                             |                                         | Parameter |
|---------------------------------------------|-----------------------------------------|-----------|
|                                             |                                         | (29)      |
|                                             | 404060001                               | ,000      |
|                                             | 404060002                               | ,000      |
|                                             | 404310003                               | ,000      |
|                                             | 404310004                               | ,000      |
|                                             | 502300005                               | ,000      |
|                                             | 502300006                               | ,000      |
|                                             | 502300007                               | 1,000     |
|                                             | 502300214                               | ,000      |
|                                             | 502300411                               | ,000      |
|                                             | 502300415                               | ,000      |
|                                             | 502300416                               | ,000      |
|                                             | 502300811                               | ,000      |
|                                             | 502300913                               | ,000      |
| weekday veckodag                            | 1 måndag                                |           |
|                                             | 2 tisdag                                |           |
|                                             | 3 onsdag                                |           |
|                                             | 4 torsdag                               |           |
|                                             | 5 fredag                                |           |
|                                             | 6 lördag                                |           |
|                                             | 7 söndag                                |           |
| season säsong/period                        | 1 januari-mars                          |           |
|                                             | 2 april-maj                             |           |
|                                             | 3 juni-augusti                          |           |
|                                             | 4 september-oktober                     |           |
|                                             | 5 november-december                     |           |
| bv2 belastning vs paoncil halva intervallet | 1 medelbelastning                       |           |
|                                             | 2 underbelastning                       |           |
|                                             | 3 överbelastning                        |           |
| holiday större helg                         | 1 ingen större helg                     |           |
|                                             | 2 större helg (påsk/midsommar/julonyår) |           |

## Categorical Variables Codings

|                                             |                                         | Parameter |
|---------------------------------------------|-----------------------------------------|-----------|
|                                             |                                         | (30)      |
|                                             | 404060001                               | ,000      |
|                                             | 404060002                               | ,000      |
|                                             | 404310003                               | ,000      |
|                                             | 404310004                               | ,000      |
|                                             | 502300005                               | ,000      |
|                                             | 502300006                               | ,000      |
|                                             | 502300007                               | ,000      |
|                                             | 502300214                               | 1,000     |
|                                             | 502300411                               | ,000      |
|                                             | 502300415                               | ,000      |
|                                             | 502300416                               | ,000      |
|                                             | 502300811                               | ,000      |
|                                             | 502300913                               | ,000      |
| weekday veckodag                            | 1 måndag                                |           |
|                                             | 2 tisdag                                |           |
|                                             | 3 onsdag                                |           |
|                                             | 4 torsdag                               |           |
|                                             | 5 fredag                                |           |
|                                             | 6 lördag                                |           |
|                                             | 7 söndag                                |           |
| season säsong/period                        | 1 januari-mars                          |           |
|                                             | 2 april-maj                             |           |
|                                             | 3 juni-augusti                          |           |
|                                             | 4 september-oktober                     |           |
|                                             | 5 november-december                     |           |
| bv2 belastning vs paoncil halva intervallet | 1 medelbelastning                       |           |
|                                             | 2 underbelastning                       |           |
|                                             | 3 överbelastning                        |           |
| holiday större helg                         | 1 ingen större helg                     |           |
|                                             | 2 större helg (påsk/midsommar/julonyår) |           |

## Categorical Variables Codings

|                                             |                                         | Parameter |
|---------------------------------------------|-----------------------------------------|-----------|
|                                             |                                         | (31)      |
|                                             | 404060001                               | ,000      |
|                                             | 404060002                               | ,000      |
|                                             | 404310003                               | ,000      |
|                                             | 404310004                               | ,000      |
|                                             | 502300005                               | ,000      |
|                                             | 502300006                               | ,000      |
|                                             | 502300007                               | ,000      |
|                                             | 502300214                               | ,000      |
|                                             | 502300411                               | 1,000     |
|                                             | 502300415                               | ,000      |
|                                             | 502300416                               | ,000      |
|                                             | 502300811                               | ,000      |
|                                             | 502300913                               | ,000      |
| weekday veckodag                            | 1 måndag                                |           |
|                                             | 2 tisdag                                |           |
|                                             | 3 onsdag                                |           |
|                                             | 4 torsdag                               |           |
|                                             | 5 fredag                                |           |
|                                             | 6 lördag                                |           |
|                                             | 7 söndag                                |           |
| season säsong/period                        | 1 januari-mars                          |           |
|                                             | 2 april-maj                             |           |
|                                             | 3 juni-augusti                          |           |
|                                             | 4 september-oktober                     |           |
|                                             | 5 november-december                     |           |
| bv2 belastning vs paoncil halva intervallet | 1 medelbelastning                       |           |
|                                             | 2 underbelastning                       |           |
|                                             | 3 överbelastning                        |           |
| holiday större helg                         | 1 ingen större helg                     |           |
|                                             | 2 större helg (påsk/midsommar/julonyår) |           |

## Categorical Variables Codings

|                                             |                                         | Parameter |
|---------------------------------------------|-----------------------------------------|-----------|
|                                             |                                         | (32)      |
|                                             | 404060001                               | ,000      |
|                                             | 404060002                               | ,000      |
|                                             | 404310003                               | ,000      |
|                                             | 404310004                               | ,000      |
|                                             | 502300005                               | ,000      |
|                                             | 502300006                               | ,000      |
|                                             | 502300007                               | ,000      |
|                                             | 502300214                               | ,000      |
|                                             | 502300411                               | ,000      |
|                                             | 502300415                               | 1,000     |
|                                             | 502300416                               | ,000      |
|                                             | 502300811                               | ,000      |
|                                             | 502300913                               | ,000      |
| weekday veckodag                            | 1 måndag                                |           |
|                                             | 2 tisdag                                |           |
|                                             | 3 onsdag                                |           |
|                                             | 4 torsdag                               |           |
|                                             | 5 fredag                                |           |
|                                             | 6 lördag                                |           |
|                                             | 7 söndag                                |           |
| season säsong/period                        | 1 januari-mars                          |           |
|                                             | 2 april-maj                             |           |
|                                             | 3 juni-augusti                          |           |
|                                             | 4 september-oktober                     |           |
|                                             | 5 november-december                     |           |
| bv2 belastning vs paoncil halva intervallet | 1 medelbelastning                       |           |
|                                             | 2 underbelastning                       |           |
|                                             | 3 överbelastning                        |           |
| holiday större helg                         | 1 ingen större helg                     |           |
|                                             | 2 större helg (påsk/midsommar/julonyår) |           |

## Categorical Variables Codings

|                                             |                                         | Parameter |
|---------------------------------------------|-----------------------------------------|-----------|
|                                             |                                         | (33)      |
|                                             | 404060001                               | ,000      |
|                                             | 404060002                               | ,000      |
|                                             | 404310003                               | ,000      |
|                                             | 404310004                               | ,000      |
|                                             | 502300005                               | ,000      |
|                                             | 502300006                               | ,000      |
|                                             | 502300007                               | ,000      |
|                                             | 502300214                               | ,000      |
|                                             | 502300411                               | ,000      |
|                                             | 502300415                               | ,000      |
|                                             | 502300416                               | 1,000     |
|                                             | 502300811                               | ,000      |
|                                             | 502300913                               | ,000      |
| weekday veckodag                            | 1 måndag                                |           |
|                                             | 2 tisdag                                |           |
|                                             | 3 onsdag                                |           |
|                                             | 4 torsdag                               |           |
|                                             | 5 fredag                                |           |
|                                             | 6 lördag                                |           |
|                                             | 7 söndag                                |           |
| season säsong/period                        | 1 januari-mars                          |           |
|                                             | 2 april-maj                             |           |
|                                             | 3 juni-augusti                          |           |
|                                             | 4 september-oktober                     |           |
|                                             | 5 november-december                     |           |
| bv2 belastning vs paoncil halva intervallet | 1 medelbelastning                       |           |
|                                             | 2 underbelastning                       |           |
|                                             | 3 överbelastning                        |           |
| holiday större helg                         | 1 ingen större helg                     |           |
|                                             | 2 större helg (påsk/midsommar/julonyår) |           |



## Categorical Variables Codings

|                                             |                                         | Parameter |
|---------------------------------------------|-----------------------------------------|-----------|
|                                             |                                         | (34)      |
|                                             | 404060001                               | ,000      |
|                                             | 404060002                               | ,000      |
|                                             | 404310003                               | ,000      |
|                                             | 404310004                               | ,000      |
|                                             | 502300005                               | ,000      |
|                                             | 502300006                               | ,000      |
|                                             | 502300007                               | ,000      |
|                                             | 502300214                               | ,000      |
|                                             | 502300411                               | ,000      |
|                                             | 502300415                               | ,000      |
|                                             | 502300416                               | ,000      |
|                                             | 502300811                               | 1,000     |
|                                             | 502300913                               | ,000      |
| weekday veckodag                            | 1 måndag                                |           |
|                                             | 2 tisdag                                |           |
|                                             | 3 onsdag                                |           |
|                                             | 4 torsdag                               |           |
|                                             | 5 fredag                                |           |
|                                             | 6 lördag                                |           |
|                                             | 7 söndag                                |           |
| season säsong/period                        | 1 januari-mars                          |           |
|                                             | 2 april-maj                             |           |
|                                             | 3 juni-augusti                          |           |
|                                             | 4 september-oktober                     |           |
|                                             | 5 november-december                     |           |
| bv2 belastning vs paoncil halva intervallet | 1 medelbelastning                       |           |
|                                             | 2 underbelastning                       |           |
|                                             | 3 överbelastning                        |           |
| holiday större helg                         | 1 ingen större helg                     |           |
|                                             | 2 större helg (påsk/midsommar/julonyår) |           |

## Categorical Variables Codings

|                                             |                                         | Paramete... |
|---------------------------------------------|-----------------------------------------|-------------|
|                                             |                                         | (35)        |
|                                             | 404060001                               | ,000        |
|                                             | 404060002                               | ,000        |
|                                             | 404310003                               | ,000        |
|                                             | 404310004                               | ,000        |
|                                             | 502300005                               | ,000        |
|                                             | 502300006                               | ,000        |
|                                             | 502300007                               | ,000        |
|                                             | 502300214                               | ,000        |
|                                             | 502300411                               | ,000        |
|                                             | 502300415                               | ,000        |
|                                             | 502300416                               | ,000        |
|                                             | 502300811                               | ,000        |
|                                             | 502300913                               | 1,000       |
| weekday veckodag                            | 1 måndag                                |             |
|                                             | 2 tisdag                                |             |
|                                             | 3 onsdag                                |             |
|                                             | 4 torsdag                               |             |
|                                             | 5 fredag                                |             |
|                                             | 6 lördag                                |             |
|                                             | 7 söndag                                |             |
| season säsong/period                        | 1 januari-mars                          |             |
|                                             | 2 april-maj                             |             |
|                                             | 3 juni-augusti                          |             |
|                                             | 4 september-oktober                     |             |
|                                             | 5 november-december                     |             |
| bv2 belastning vs paoncil halva intervallet | 1 medelbelastning                       |             |
|                                             | 2 underbelastning                       |             |
|                                             | 3 överbelastning                        |             |
| holiday större helg                         | 1 ingen större helg                     |             |
|                                             | 2 större helg (påsk/midsommar/julonyår) |             |

**Block 0: Beginning Block**

Classification Table<sup>a,b</sup>

| Observed           |                                |                           | Predicted                 |                      |
|--------------------|--------------------------------|---------------------------|---------------------------|----------------------|
|                    |                                |                           | 0 ingen eller en händelse | 1 mer än en händelse |
| Step 0             | handlt1 händelse larger than 1 | 0 ingen eller en händelse | 12229                     | 0                    |
|                    |                                | 1 mer än en händelse      | 246                       | 0                    |
| Overall Percentage |                                |                           |                           |                      |

Classification Table<sup>a,b</sup>

| Observed           |                                |                           | Predicted          |
|--------------------|--------------------------------|---------------------------|--------------------|
|                    |                                |                           | Percentage Correct |
| Step 0             | handlt1 händelse larger than 1 | 0 ingen eller en händelse | 100,0              |
|                    |                                | 1 mer än en händelse      | ,0                 |
| Overall Percentage |                                |                           | 98,0               |

a. Constant is included in the model.

b. The cut value is ,500

Variables in the Equation

|                 | B      | S.E. | Wald     | df | Sig. | Exp(B) |
|-----------------|--------|------|----------|----|------|--------|
| Step 0 Constant | -3,906 | ,064 | 3679,612 | 1  | ,000 | ,020   |

## Variables not in the Equation

|        |           |            | Score   | df | Sig. |
|--------|-----------|------------|---------|----|------|
| Step 0 | Variables | bv2        | 9,226   | 2  | ,010 |
|        |           | bv2(1)     | 8,102   | 1  | ,004 |
|        |           | bv2(2)     | 6,880   | 1  | ,009 |
|        |           | VASTY2     | 211,294 | 35 | ,000 |
|        |           | VASTY2(1)  | ,109    | 1  | ,741 |
|        |           | VASTY2(2)  | 2,111   | 1  | ,146 |
|        |           | VASTY2(3)  | 5,608   | 1  | ,018 |
|        |           | VASTY2(4)  | ,094    | 1  | ,759 |
|        |           | VASTY2(5)  | 1,981   | 1  | ,159 |
|        |           | VASTY2(6)  | 7,542   | 1  | ,006 |
|        |           | VASTY2(7)  | 3,478   | 1  | ,062 |
|        |           | VASTY2(8)  | ,006    | 1  | ,940 |
|        |           | VASTY2(9)  | ,082    | 1  | ,775 |
|        |           | VASTY2(10) | 36,459  | 1  | ,000 |
|        |           | VASTY2(11) | 27,814  | 1  | ,000 |
|        |           | VASTY2(12) | 2,573   | 1  | ,109 |
|        |           | VASTY2(13) | ,705    | 1  | ,401 |
|        |           | VASTY2(14) | ,209    | 1  | ,647 |
|        |           | VASTY2(15) | ,209    | 1  | ,647 |
|        |           | VASTY2(16) | ,071    | 1  | ,789 |
|        |           | VASTY2(17) | 7,564   | 1  | ,006 |
|        |           | VASTY2(18) | 7,500   | 1  | ,006 |
|        |           | VASTY2(19) | 5,608   | 1  | ,018 |
|        |           | VASTY2(20) | 1,471   | 1  | ,225 |
|        |           | VASTY2(21) | 2,573   | 1  | ,109 |
|        |           | VASTY2(22) | ,474    | 1  | ,491 |
|        |           | VASTY2(23) | 41,219  | 1  | ,000 |
|        |           | VASTY2(24) | 20,216  | 1  | ,000 |
|        |           | VASTY2(25) | ,290    | 1  | ,590 |
|        |           | VASTY2(26) | ,550    | 1  | ,458 |
|        |           | VASTY2(27) | 5,629   | 1  | ,018 |
|        |           | VASTY2(28) | 2,766   | 1  | ,096 |
|        |           | VASTY2(29) | 7,585   | 1  | ,006 |
|        |           | VASTY2(30) | ,089    | 1  | ,765 |
|        |           | VASTY2(31) | 8,820   | 1  | ,003 |
|        |           | VASTY2(32) | ,652    | 1  | ,419 |
|        |           | VASTY2(33) | 1,464   | 1  | ,226 |
|        |           | VASTY2(34) | 5,587   | 1  | ,018 |
|        |           | VASTY2(35) | 7,764   | 1  | ,005 |
|        |           | weekday    | 3,270   | 6  | ,774 |
|        |           | weekday(1) | ,002    | 1  | ,961 |
|        |           | weekday(2) | ,075    | 1  | ,784 |
|        |           | weekday(3) | ,720    | 1  | ,396 |

**Variables not in the Equation**

|                    | Score   | df | Sig. |
|--------------------|---------|----|------|
| weekday(4)         | ,019    | 1  | ,892 |
| weekday(5)         | 2,336   | 1  | ,126 |
| weekday(6)         | ,004    | 1  | ,951 |
| holiday(1)         | 3,138   | 1  | ,076 |
| season             | 6,828   | 4  | ,145 |
| season(1)          | ,483    | 1  | ,487 |
| season(2)          | 3,014   | 1  | ,083 |
| season(3)          | 4,003   | 1  | ,045 |
| season(4)          | ,934    | 1  | ,334 |
| Overall Statistics | 229,863 | 48 | ,000 |

**Block 1: Method = Enter**

**Omnibus Tests of Model Coefficients**

|             | Chi-square | df | Sig. |
|-------------|------------|----|------|
| Step 1 Step | 228,418    | 48 | ,000 |
| Block       | 228,418    | 48 | ,000 |
| Model       | 228,418    | 48 | ,000 |

**Model Summary**

| Step | -2 Log likelihood     | Cox & Snell R Square | Nagelkerke R Square |
|------|-----------------------|----------------------|---------------------|
| 1    | 2190,364 <sup>a</sup> | ,018                 | ,103                |

a. Estimation terminated at iteration number 20 because maximum iterations has been reached. Final solution cannot be found.

**Classification Table<sup>a</sup>**

|                    |                               | Predicted                 |                      |
|--------------------|-------------------------------|---------------------------|----------------------|
|                    |                               | 0 ingen eller en händelse | 1 mer än en händelse |
| Observed           | handt1 händelse larger than 1 | 12229                     | 0                    |
|                    |                               | 246                       | 0                    |
| Overall Percentage |                               |                           |                      |

**Classification Table<sup>a</sup>**

|                    |                               | Predicted          |
|--------------------|-------------------------------|--------------------|
|                    |                               | Percentage Correct |
| Observed           | handt1 händelse larger than 1 | 100,0              |
|                    |                               | ,0                 |
| Overall Percentage |                               | 98,0               |

a. The cut value is ,500

## Variables in the Equation

|                         | B       | S.E.     | Wald    | df | Sig. | Exp(B) |
|-------------------------|---------|----------|---------|----|------|--------|
| Step 1 <sup>a</sup> bv2 |         |          | 6,307   | 2  | ,043 |        |
| bv2(1)                  | -,211   | ,190     | 1,234   | 1  | ,267 | ,810   |
| bv2(2)                  | ,212    | ,171     | 1,537   | 1  | ,215 | 1,237  |
| VASTY2                  |         |          | 120,890 | 35 | ,000 |        |
| VASTY2(1)               | ,460    | ,576     | ,638    | 1  | ,424 | 1,584  |
| VASTY2(2)               | ,750    | ,545     | 1,889   | 1  | ,169 | 2,116  |
| VASTY2(3)               | -1,780  | 1,100    | 2,618   | 1  | ,106 | ,169   |
| VASTY2(4)               | ,345    | ,578     | ,356    | 1  | ,551 | 1,412  |
| VASTY2(5)               | -,502   | ,735     | ,466    | 1  | ,495 | ,605   |
| VASTY2(6)               | -17,014 | 2094,841 | ,000    | 1  | ,994 | ,000   |
| VASTY2(7)               | ,724    | ,544     | 1,775   | 1  | ,183 | 2,063  |
| VASTY2(8)               | ,244    | ,592     | ,170    | 1  | ,680 | 1,276  |
| VASTY2(9)               | ,134    | ,612     | ,048    | 1  | ,827 | 1,143  |
| VASTY2(10)              | 1,501   | ,501     | 8,989   | 1  | ,003 | 4,487  |
| VASTY2(11)              | 1,443   | ,504     | 8,185   | 1  | ,004 | 4,232  |
| VASTY2(12)              | -,604   | ,735     | ,675    | 1  | ,411 | ,547   |
| VASTY2(13)              | -,172   | ,641     | ,072    | 1  | ,788 | ,842   |
| VASTY2(14)              | ,094    | ,612     | ,023    | 1  | ,878 | 1,098  |
| VASTY2(15)              | ,099    | ,612     | ,026    | 1  | ,872 | 1,104  |
| VASTY2(16)              | ,082    | ,739     | ,012    | 1  | ,912 | 1,085  |
| VASTY2(17)              | -16,892 | 2090,901 | ,000    | 1  | ,994 | ,000   |
| VASTY2(18)              | -16,934 | 2098,904 | ,000    | 1  | ,994 | ,000   |
| VASTY2(19)              | -1,441  | 1,102    | 1,708   | 1  | ,191 | ,237   |
| VASTY2(20)              | -,464   | ,737     | ,397    | 1  | ,528 | ,629   |
| VASTY2(21)              | -,570   | ,735     | ,601    | 1  | ,438 | ,566   |
| VASTY2(22)              | ,716    | ,565     | 1,603   | 1  | ,205 | 2,046  |
| VASTY2(23)              | 1,616   | ,498     | 10,528  | 1  | ,001 | 5,034  |
| VASTY2(24)              | 1,222   | ,512     | 5,700   | 1  | ,017 | 3,393  |
| VASTY2(25)              | ,531    | ,592     | ,804    | 1  | ,370 | 1,700  |
| VASTY2(26)              | -,139   | ,677     | ,042    | 1  | ,838 | ,871   |
| VASTY2(27)              | -1,750  | 1,099    | 2,535   | 1  | ,111 | ,174   |
| VASTY2(28)              | -1,329  | 1,101    | 1,458   | 1  | ,227 | ,265   |
| VASTY2(29)              | -16,999 | 2092,769 | ,000    | 1  | ,994 | ,000   |
| VASTY2(30)              | ,398    | ,576     | ,479    | 1  | ,489 | 1,490  |
| VASTY2(31)              | 1,070   | ,524     | 4,177   | 1  | ,041 | 2,916  |
| VASTY2(32)              | ,017    | ,638     | ,001    | 1  | ,979 | 1,017  |
| VASTY2(33)              | -,230   | ,676     | ,115    | 1  | ,734 | ,795   |
| VASTY2(34)              | -1,681  | 1,098    | 2,343   | 1  | ,126 | ,186   |
| VASTY2(35)              | ,954    | ,536     | 3,167   | 1  | ,075 | 2,596  |
| weekday                 |         |          | 2,461   | 6  | ,873 |        |

## Variables in the Equation

|                     |            | 95% C.I. for EXP(B) |        |
|---------------------|------------|---------------------|--------|
|                     |            | Lower               | Upper  |
| Step 1 <sup>a</sup> | bv2        |                     |        |
|                     | bv2(1)     | ,559                | 1,175  |
|                     | bv2(2)     | ,884                | 1,730  |
|                     | VASTY2     |                     |        |
|                     | VASTY2(1)  | ,513                | 4,893  |
|                     | VASTY2(2)  | ,727                | 6,164  |
|                     | VASTY2(3)  | ,020                | 1,457  |
|                     | VASTY2(4)  | ,455                | 4,384  |
|                     | VASTY2(5)  | ,143                | 2,558  |
|                     | VASTY2(6)  | ,000                | .      |
|                     | VASTY2(7)  | ,711                | 5,988  |
|                     | VASTY2(8)  | ,400                | 4,073  |
|                     | VASTY2(9)  | ,344                | 3,796  |
|                     | VASTY2(10) | 1,682               | 11,970 |
|                     | VASTY2(11) | 1,575               | 11,370 |
|                     | VASTY2(12) | ,129                | 2,310  |
|                     | VASTY2(13) | ,240                | 2,956  |
|                     | VASTY2(14) | ,331                | 3,644  |
|                     | VASTY2(15) | ,333                | 3,660  |
|                     | VASTY2(16) | ,255                | 4,616  |
|                     | VASTY2(17) | ,000                | .      |
|                     | VASTY2(18) | ,000                | .      |
|                     | VASTY2(19) | ,027                | 2,055  |
|                     | VASTY2(20) | ,148                | 2,663  |
|                     | VASTY2(21) | ,134                | 2,388  |
|                     | VASTY2(22) | ,675                | 6,198  |
|                     | VASTY2(23) | 1,896               | 13,362 |
|                     | VASTY2(24) | 1,245               | 9,249  |
|                     | VASTY2(25) | ,533                | 5,421  |
|                     | VASTY2(26) | ,231                | 3,282  |
|                     | VASTY2(27) | ,020                | 1,498  |
|                     | VASTY2(28) | ,031                | 2,289  |
|                     | VASTY2(29) | ,000                | .      |
|                     | VASTY2(30) | ,482                | 4,606  |
|                     | VASTY2(31) | 1,045               | 8,140  |
|                     | VASTY2(32) | ,291                | 3,553  |
|                     | VASTY2(33) | ,211                | 2,989  |
|                     | VASTY2(34) | ,022                | 1,602  |
|                     | VASTY2(35) | ,908                | 7,423  |
|                     | weekday    |                     |        |

## Variables in the Equation

|            | B      | S.E. | Wald   | df | Sig. | Exp(B) |
|------------|--------|------|--------|----|------|--------|
| weekday(1) | -,116  | ,235 | ,243   | 1  | ,622 | ,891   |
| weekday(2) | -,168  | ,238 | ,498   | 1  | ,481 | ,845   |
| weekday(3) | ,010   | ,229 | ,002   | 1  | ,967 | 1,010  |
| weekday(4) | -,070  | ,235 | ,089   | 1  | ,766 | ,932   |
| weekday(5) | -,339  | ,258 | 1,729  | 1  | ,188 | ,712   |
| weekday(6) | -,088  | ,239 | ,136   | 1  | ,712 | ,916   |
| holiday(1) | -,795  | ,595 | 1,784  | 1  | ,182 | ,451   |
| season     |        |      | 5,407  | 4  | ,248 |        |
| season(1)  | ,079   | ,198 | ,158   | 1  | ,691 | 1,082  |
| season(2)  | -,209  | ,199 | 1,104  | 1  | ,293 | ,811   |
| season(3)  | ,238   | ,190 | 1,573  | 1  | ,210 | 1,268  |
| season(4)  | -,105  | ,214 | ,242   | 1  | ,623 | ,900   |
| Constant   | -4,117 | ,499 | 68,130 | 1  | ,000 | ,016   |

## Variables in the Equation

|            | 95% C.I. for EXP(B) |       |
|------------|---------------------|-------|
|            | Lower               | Upper |
| weekday(1) | ,562                | 1,411 |
| weekday(2) | ,530                | 1,348 |
| weekday(3) | ,645                | 1,581 |
| weekday(4) | ,588                | 1,477 |
| weekday(5) | ,430                | 1,181 |
| weekday(6) | ,573                | 1,463 |
| holiday(1) | ,141                | 1,450 |
| season     |                     |       |
| season(1)  | ,734                | 1,594 |
| season(2)  | ,549                | 1,199 |
| season(3)  | ,875                | 1,839 |
| season(4)  | ,592                | 1,368 |
| Constant   |                     |       |

a. Variable(s) entered on step 1: bv2, VASTY2, weekday, holiday, season.

```
LOGISTIC REGRESSION VARIABLES handlt1
/METHOD=ENTER bv3 VASTY2 weekday holiday season
/CONTRAST (bv3)=Indicator(1)
/CONTRAST (VASTY2)=Indicator(1)
/CONTRAST (weekday)=Indicator(1)
/CONTRAST (holiday)=Indicator(1)
/CONTRAST (season)=Indicator(1)
/PRINT=CI(95)
/CRITERIA=PIN(0.05) POUT(0.10) ITERATE(20) CUT(0.5).
```



## Logistic Regression

[DataSet6] C:\cWordjan\Rafaela\_VCS\alla\_tillsammans\abo\_bjo\_vasa\_v1.sav

### Case Processing Summary

| Unweighted Cases <sup>a</sup> |                      | N     | Percent |
|-------------------------------|----------------------|-------|---------|
| Selected Cases                | Included in Analysis | 12475 | 100,0   |
|                               | Missing Cases        | 0     | ,0      |
|                               | Total                | 12475 | 100,0   |
| Unselected Cases              |                      | 0     | ,0      |
| Total                         |                      | 12475 | 100,0   |

a. If weight is in effect, see classification table for the total number of cases.

### Dependent Variable Encoding

| Original Value            | Internal Value |
|---------------------------|----------------|
| 0 ingen eller en händelse | 0              |
| 1 mer än en händelse      | 1              |

### Categorical Variables Codings

|                           | Frequency |
|---------------------------|-----------|
| VASTY2 (SAIR*10000)+VASTY | 365       |
| 403073101                 | 362       |
| 403073102                 | 365       |
| 403073103                 | 365       |
| 403073202                 | 365       |
| 403073203                 | 365       |
| 403073204                 | 330       |
| 403073303                 | 364       |
| 403073651                 | 362       |
| 403073771                 | 365       |
| 403133102                 | 341       |
| 403133106                 | 365       |
| 403133107                 | 365       |
| 403133109                 | 365       |
| 403133202                 | 365       |
| 403133203                 | 365       |
| 403133204                 | 365       |
| 403133315                 | 177       |
| 403133322                 | 365       |
| 403133401                 | 362       |
| 403133402                 | 365       |
| 403133550                 | 298       |
| 403133772                 | 365       |
| 403135803                 | 365       |

## Categorical Variables Codings

|                           |           | Parameter |
|---------------------------|-----------|-----------|
|                           |           | (1)       |
| VASTY2 (SAIR*10000)+VASTY | 403073101 | ,000      |
|                           | 403073102 | 1,000     |
|                           | 403073103 | ,000      |
|                           | 403073202 | ,000      |
|                           | 403073203 | ,000      |
|                           | 403073204 | ,000      |
|                           | 403073303 | ,000      |
|                           | 403073651 | ,000      |
|                           | 403073771 | ,000      |
|                           | 403133102 | ,000      |
|                           | 403133106 | ,000      |
|                           | 403133107 | ,000      |
|                           | 403133109 | ,000      |
|                           | 403133202 | ,000      |
|                           | 403133203 | ,000      |
|                           | 403133204 | ,000      |
|                           | 403133315 | ,000      |
|                           | 403133322 | ,000      |
|                           | 403133401 | ,000      |
|                           | 403133402 | ,000      |
|                           | 403133550 | ,000      |
|                           | 403133772 | ,000      |
|                           | 403135803 | ,000      |

1  
2  
3  
4  
5  
6  
7  
8  
9  
10  
11  
12  
13  
14  
15  
16  
17  
18  
19  
20  
21  
22  
23  
24  
25  
26  
27  
28  
29  
30  
31  
32  
33  
34  
35  
36  
37  
38  
39  
40  
41  
42  
43  
44  
45  
46  
47  
48  
49  
50  
51  
52  
53  
54  
55  
56  
57  
58  
59  
60

**Categorical Variables Codings**

|                           |           | Parameter |
|---------------------------|-----------|-----------|
|                           |           | (2)       |
| VASTY2 (SAIR*10000)+VASTY | 403073101 | ,000      |
|                           | 403073102 | ,000      |
|                           | 403073103 | 1,000     |
|                           | 403073202 | ,000      |
|                           | 403073203 | ,000      |
|                           | 403073204 | ,000      |
|                           | 403073303 | ,000      |
|                           | 403073651 | ,000      |
|                           | 403073771 | ,000      |
|                           | 403133102 | ,000      |
|                           | 403133106 | ,000      |
|                           | 403133107 | ,000      |
|                           | 403133109 | ,000      |
|                           | 403133202 | ,000      |
|                           | 403133203 | ,000      |
|                           | 403133204 | ,000      |
|                           | 403133315 | ,000      |
|                           | 403133322 | ,000      |
|                           | 403133401 | ,000      |
|                           | 403133402 | ,000      |
|                           | 403133550 | ,000      |
|                           | 403133772 | ,000      |
|                           | 403135803 | ,000      |

For peer review only

## Categorical Variables Codings

|                           |           | Parameter |
|---------------------------|-----------|-----------|
|                           |           | (3)       |
| VASTY2 (SAIR*10000)+VASTY | 403073101 | ,000      |
|                           | 403073102 | ,000      |
|                           | 403073103 | ,000      |
|                           | 403073202 | 1,000     |
|                           | 403073203 | ,000      |
|                           | 403073204 | ,000      |
|                           | 403073303 | ,000      |
|                           | 403073651 | ,000      |
|                           | 403073771 | ,000      |
|                           | 403133102 | ,000      |
|                           | 403133106 | ,000      |
|                           | 403133107 | ,000      |
|                           | 403133109 | ,000      |
|                           | 403133202 | ,000      |
|                           | 403133203 | ,000      |
|                           | 403133204 | ,000      |
|                           | 403133315 | ,000      |
|                           | 403133322 | ,000      |
|                           | 403133401 | ,000      |
|                           | 403133402 | ,000      |
|                           | 403133550 | ,000      |
|                           | 403133772 | ,000      |
|                           | 403135803 | ,000      |

## Categorical Variables Codings

|                           |           | Parameter |
|---------------------------|-----------|-----------|
|                           |           | (4)       |
| VASTY2 (SAIR*10000)+VASTY | 403073101 | ,000      |
|                           | 403073102 | ,000      |
|                           | 403073103 | ,000      |
|                           | 403073202 | ,000      |
|                           | 403073203 | 1,000     |
|                           | 403073204 | ,000      |
|                           | 403073303 | ,000      |
|                           | 403073651 | ,000      |
|                           | 403073771 | ,000      |
|                           | 403133102 | ,000      |
|                           | 403133106 | ,000      |
|                           | 403133107 | ,000      |
|                           | 403133109 | ,000      |
|                           | 403133202 | ,000      |
|                           | 403133203 | ,000      |
|                           | 403133204 | ,000      |
|                           | 403133315 | ,000      |
|                           | 403133322 | ,000      |
|                           | 403133401 | ,000      |
|                           | 403133402 | ,000      |
|                           | 403133550 | ,000      |
|                           | 403133772 | ,000      |
|                           | 403135803 | ,000      |

## Categorical Variables Codings

|                           |           | Parameter |
|---------------------------|-----------|-----------|
|                           |           | (5)       |
| VASTY2 (SAIR*10000)+VASTY | 403073101 | ,000      |
|                           | 403073102 | ,000      |
|                           | 403073103 | ,000      |
|                           | 403073202 | ,000      |
|                           | 403073203 | ,000      |
|                           | 403073204 | 1,000     |
|                           | 403073303 | ,000      |
|                           | 403073651 | ,000      |
|                           | 403073771 | ,000      |
|                           | 403133102 | ,000      |
|                           | 403133106 | ,000      |
|                           | 403133107 | ,000      |
|                           | 403133109 | ,000      |
|                           | 403133202 | ,000      |
|                           | 403133203 | ,000      |
|                           | 403133204 | ,000      |
|                           | 403133315 | ,000      |
|                           | 403133322 | ,000      |
|                           | 403133401 | ,000      |
|                           | 403133402 | ,000      |
|                           | 403133550 | ,000      |
|                           | 403133772 | ,000      |
|                           | 403135803 | ,000      |

## Categorical Variables Codings

|                           |           | Parameter |
|---------------------------|-----------|-----------|
|                           |           | (6)       |
| VASTY2 (SAIR*10000)+VASTY | 403073101 | ,000      |
|                           | 403073102 | ,000      |
|                           | 403073103 | ,000      |
|                           | 403073202 | ,000      |
|                           | 403073203 | ,000      |
|                           | 403073204 | ,000      |
|                           | 403073303 | 1,000     |
|                           | 403073651 | ,000      |
|                           | 403073771 | ,000      |
|                           | 403133102 | ,000      |
|                           | 403133106 | ,000      |
|                           | 403133107 | ,000      |
|                           | 403133109 | ,000      |
|                           | 403133202 | ,000      |
|                           | 403133203 | ,000      |
|                           | 403133204 | ,000      |
|                           | 403133315 | ,000      |
|                           | 403133322 | ,000      |
|                           | 403133401 | ,000      |
|                           | 403133402 | ,000      |
|                           | 403133550 | ,000      |
|                           | 403133772 | ,000      |
|                           | 403135803 | ,000      |

## Categorical Variables Codings

|                           |           | Parameter |
|---------------------------|-----------|-----------|
|                           |           | (7)       |
| VASTY2 (SAIR*10000)+VASTY | 403073101 | ,000      |
|                           | 403073102 | ,000      |
|                           | 403073103 | ,000      |
|                           | 403073202 | ,000      |
|                           | 403073203 | ,000      |
|                           | 403073204 | ,000      |
|                           | 403073303 | ,000      |
|                           | 403073651 | 1,000     |
|                           | 403073771 | ,000      |
|                           | 403133102 | ,000      |
|                           | 403133106 | ,000      |
|                           | 403133107 | ,000      |
|                           | 403133109 | ,000      |
|                           | 403133202 | ,000      |
|                           | 403133203 | ,000      |
|                           | 403133204 | ,000      |
|                           | 403133315 | ,000      |
|                           | 403133322 | ,000      |
|                           | 403133401 | ,000      |
|                           | 403133402 | ,000      |
|                           | 403133550 | ,000      |
|                           | 403133772 | ,000      |
|                           | 403135803 | ,000      |



1  
2  
3  
4  
5  
6  
7  
8  
9  
10  
11  
12  
13  
14  
15  
16  
17  
18  
19  
20  
21  
22  
23  
24  
25  
26  
27  
28  
29  
30  
31  
32  
33  
34  
35  
36  
37  
38  
39  
40  
41  
42  
43  
44  
45  
46  
47  
48  
49  
50  
51  
52  
53  
54  
55  
56  
57  
58  
59  
60

**Categorical Variables Codings**

|                           |           | Parameter |
|---------------------------|-----------|-----------|
|                           |           | (8)       |
| VASTY2 (SAIR*10000)+VASTY | 403073101 | ,000      |
|                           | 403073102 | ,000      |
|                           | 403073103 | ,000      |
|                           | 403073202 | ,000      |
|                           | 403073203 | ,000      |
|                           | 403073204 | ,000      |
|                           | 403073303 | ,000      |
|                           | 403073651 | ,000      |
|                           | 403073771 | 1,000     |
|                           | 403133102 | ,000      |
|                           | 403133106 | ,000      |
|                           | 403133107 | ,000      |
|                           | 403133109 | ,000      |
|                           | 403133202 | ,000      |
|                           | 403133203 | ,000      |
|                           | 403133204 | ,000      |
|                           | 403133315 | ,000      |
|                           | 403133322 | ,000      |
|                           | 403133401 | ,000      |
|                           | 403133402 | ,000      |
|                           | 403133550 | ,000      |
|                           | 403133772 | ,000      |
|                           | 403135803 | ,000      |

Peer Review Only

## Categorical Variables Codings

|                           |           | Parameter |
|---------------------------|-----------|-----------|
|                           |           | (9)       |
| VASTY2 (SAIR*10000)+VASTY | 403073101 | ,000      |
|                           | 403073102 | ,000      |
|                           | 403073103 | ,000      |
|                           | 403073202 | ,000      |
|                           | 403073203 | ,000      |
|                           | 403073204 | ,000      |
|                           | 403073303 | ,000      |
|                           | 403073651 | ,000      |
|                           | 403073771 | ,000      |
|                           | 403133102 | 1,000     |
|                           | 403133106 | ,000      |
|                           | 403133107 | ,000      |
|                           | 403133109 | ,000      |
|                           | 403133202 | ,000      |
|                           | 403133203 | ,000      |
|                           | 403133204 | ,000      |
|                           | 403133315 | ,000      |
|                           | 403133322 | ,000      |
|                           | 403133401 | ,000      |
|                           | 403133402 | ,000      |
|                           | 403133550 | ,000      |
|                           | 403133772 | ,000      |
|                           | 403135803 | ,000      |

1  
2  
3  
4  
5  
6  
7  
8  
9  
10  
11  
12  
13  
14  
15  
16  
17  
18  
19  
20  
21  
22  
23  
24  
25  
26  
27  
28  
29  
30  
31  
32  
33  
34  
35  
36  
37  
38  
39  
40  
41  
42  
43  
44  
45  
46  
47  
48  
49  
50  
51  
52  
53  
54  
55  
56  
57  
58  
59  
60

**Categorical Variables Codings**

|                           |           | Parameter |
|---------------------------|-----------|-----------|
|                           |           | (10)      |
| VASTY2 (SAIR*10000)+VASTY | 403073101 | ,000      |
|                           | 403073102 | ,000      |
|                           | 403073103 | ,000      |
|                           | 403073202 | ,000      |
|                           | 403073203 | ,000      |
|                           | 403073204 | ,000      |
|                           | 403073303 | ,000      |
|                           | 403073651 | ,000      |
|                           | 403073771 | ,000      |
|                           | 403133102 | ,000      |
|                           | 403133106 | 1,000     |
|                           | 403133107 | ,000      |
|                           | 403133109 | ,000      |
|                           | 403133202 | ,000      |
|                           | 403133203 | ,000      |
|                           | 403133204 | ,000      |
|                           | 403133315 | ,000      |
|                           | 403133322 | ,000      |
|                           | 403133401 | ,000      |
|                           | 403133402 | ,000      |
|                           | 403133550 | ,000      |
|                           | 403133772 | ,000      |
|                           | 403135803 | ,000      |

Peer Review Only

## Categorical Variables Codings

|                           |           | Parameter |
|---------------------------|-----------|-----------|
|                           |           | (11)      |
| VASTY2 (SAIR*10000)+VASTY | 403073101 | ,000      |
|                           | 403073102 | ,000      |
|                           | 403073103 | ,000      |
|                           | 403073202 | ,000      |
|                           | 403073203 | ,000      |
|                           | 403073204 | ,000      |
|                           | 403073303 | ,000      |
|                           | 403073651 | ,000      |
|                           | 403073771 | ,000      |
|                           | 403133102 | ,000      |
|                           | 403133106 | ,000      |
|                           | 403133107 | 1,000     |
|                           | 403133109 | ,000      |
|                           | 403133202 | ,000      |
|                           | 403133203 | ,000      |
|                           | 403133204 | ,000      |
|                           | 403133315 | ,000      |
|                           | 403133322 | ,000      |
|                           | 403133401 | ,000      |
|                           | 403133402 | ,000      |
|                           | 403133550 | ,000      |
|                           | 403133772 | ,000      |
|                           | 403135803 | ,000      |

1  
2  
3  
4  
5  
6  
7  
8  
9  
10  
11  
12  
13  
14  
15  
16  
17  
18  
19  
20  
21  
22  
23  
24  
25  
26  
27  
28  
29  
30  
31  
32  
33  
34  
35  
36  
37  
38  
39  
40  
41  
42  
43  
44  
45  
46  
47  
48  
49  
50  
51  
52  
53  
54  
55  
56  
57  
58  
59  
60

**Categorical Variables Codings**

|                           |           | Parameter |
|---------------------------|-----------|-----------|
|                           |           | (12)      |
| VASTY2 (SAIR*10000)+VASTY | 403073101 | ,000      |
|                           | 403073102 | ,000      |
|                           | 403073103 | ,000      |
|                           | 403073202 | ,000      |
|                           | 403073203 | ,000      |
|                           | 403073204 | ,000      |
|                           | 403073303 | ,000      |
|                           | 403073651 | ,000      |
|                           | 403073771 | ,000      |
|                           | 403133102 | ,000      |
|                           | 403133106 | ,000      |
|                           | 403133107 | ,000      |
|                           | 403133109 | 1,000     |
|                           | 403133202 | ,000      |
|                           | 403133203 | ,000      |
|                           | 403133204 | ,000      |
|                           | 403133315 | ,000      |
|                           | 403133322 | ,000      |
|                           | 403133401 | ,000      |
|                           | 403133402 | ,000      |
|                           | 403133550 | ,000      |
|                           | 403133772 | ,000      |
|                           | 403135803 | ,000      |

For peer review only

## Categorical Variables Codings

|                           |           | Parameter |
|---------------------------|-----------|-----------|
|                           |           | (13)      |
| VASTY2 (SAIR*10000)+VASTY | 403073101 | ,000      |
|                           | 403073102 | ,000      |
|                           | 403073103 | ,000      |
|                           | 403073202 | ,000      |
|                           | 403073203 | ,000      |
|                           | 403073204 | ,000      |
|                           | 403073303 | ,000      |
|                           | 403073651 | ,000      |
|                           | 403073771 | ,000      |
|                           | 403133102 | ,000      |
|                           | 403133106 | ,000      |
|                           | 403133107 | ,000      |
|                           | 403133109 | ,000      |
|                           | 403133202 | 1,000     |
|                           | 403133203 | ,000      |
|                           | 403133204 | ,000      |
|                           | 403133315 | ,000      |
|                           | 403133322 | ,000      |
|                           | 403133401 | ,000      |
|                           | 403133402 | ,000      |
|                           | 403133550 | ,000      |
|                           | 403133772 | ,000      |
|                           | 403135803 | ,000      |

**Categorical Variables Codings**

|                           |           | Parameter |
|---------------------------|-----------|-----------|
|                           |           | (14)      |
| VASTY2 (SAIR*10000)+VASTY | 403073101 | ,000      |
|                           | 403073102 | ,000      |
|                           | 403073103 | ,000      |
|                           | 403073202 | ,000      |
|                           | 403073203 | ,000      |
|                           | 403073204 | ,000      |
|                           | 403073303 | ,000      |
|                           | 403073651 | ,000      |
|                           | 403073771 | ,000      |
|                           | 403133102 | ,000      |
|                           | 403133106 | ,000      |
|                           | 403133107 | ,000      |
|                           | 403133109 | ,000      |
|                           | 403133202 | ,000      |
|                           | 403133203 | 1,000     |
|                           | 403133204 | ,000      |
|                           | 403133315 | ,000      |
|                           | 403133322 | ,000      |
|                           | 403133401 | ,000      |
|                           | 403133402 | ,000      |
|                           | 403133550 | ,000      |
|                           | 403133772 | ,000      |
|                           | 403135803 | ,000      |

Peer Review Only

1  
2  
3  
4  
5  
6  
7  
8  
9  
10  
11  
12  
13  
14  
15  
16  
17  
18  
19  
20  
21  
22  
23  
24  
25  
26  
27  
28  
29  
30  
31  
32  
33  
34  
35  
36  
37  
38  
39  
40  
41  
42  
43  
44  
45  
46  
47  
48  
49  
50  
51  
52  
53  
54  
55  
56  
57  
58  
59  
60

## Categorical Variables Codings

|                           |           | Parameter |
|---------------------------|-----------|-----------|
|                           |           | (15)      |
| VASTY2 (SAIR*10000)+VASTY | 403073101 | ,000      |
|                           | 403073102 | ,000      |
|                           | 403073103 | ,000      |
|                           | 403073202 | ,000      |
|                           | 403073203 | ,000      |
|                           | 403073204 | ,000      |
|                           | 403073303 | ,000      |
|                           | 403073651 | ,000      |
|                           | 403073771 | ,000      |
|                           | 403133102 | ,000      |
|                           | 403133106 | ,000      |
|                           | 403133107 | ,000      |
|                           | 403133109 | ,000      |
|                           | 403133202 | ,000      |
|                           | 403133203 | ,000      |
|                           | 403133204 | 1,000     |
|                           | 403133315 | ,000      |
|                           | 403133322 | ,000      |
|                           | 403133401 | ,000      |
|                           | 403133402 | ,000      |
|                           | 403133550 | ,000      |
|                           | 403133772 | ,000      |
|                           | 403135803 | ,000      |



1  
2  
3  
4  
5  
6  
7  
8  
9  
10  
11  
12  
13  
14  
15  
16  
17  
18  
19  
20  
21  
22  
23  
24  
25  
26  
27  
28  
29  
30  
31  
32  
33  
34  
35  
36  
37  
38  
39  
40  
41  
42  
43  
44  
45  
46  
47  
48  
49  
50  
51  
52  
53  
54  
55  
56  
57  
58  
59  
60

**Categorical Variables Codings**

|                           |           | Parameter |
|---------------------------|-----------|-----------|
|                           |           | (16)      |
| VASTY2 (SAIR*10000)+VASTY | 403073101 | ,000      |
|                           | 403073102 | ,000      |
|                           | 403073103 | ,000      |
|                           | 403073202 | ,000      |
|                           | 403073203 | ,000      |
|                           | 403073204 | ,000      |
|                           | 403073303 | ,000      |
|                           | 403073651 | ,000      |
|                           | 403073771 | ,000      |
|                           | 403133102 | ,000      |
|                           | 403133106 | ,000      |
|                           | 403133107 | ,000      |
|                           | 403133109 | ,000      |
|                           | 403133202 | ,000      |
|                           | 403133203 | ,000      |
|                           | 403133204 | ,000      |
|                           | 403133315 | 1,000     |
|                           | 403133322 | ,000      |
|                           | 403133401 | ,000      |
|                           | 403133402 | ,000      |
|                           | 403133550 | ,000      |
|                           | 403133772 | ,000      |
|                           | 403135803 | ,000      |

Peer Review Only

## Categorical Variables Codings

|                           |           | Parameter |
|---------------------------|-----------|-----------|
|                           |           | (17)      |
| VASTY2 (SAIR*10000)+VASTY | 403073101 | ,000      |
|                           | 403073102 | ,000      |
|                           | 403073103 | ,000      |
|                           | 403073202 | ,000      |
|                           | 403073203 | ,000      |
|                           | 403073204 | ,000      |
|                           | 403073303 | ,000      |
|                           | 403073651 | ,000      |
|                           | 403073771 | ,000      |
|                           | 403133102 | ,000      |
|                           | 403133106 | ,000      |
|                           | 403133107 | ,000      |
|                           | 403133109 | ,000      |
|                           | 403133202 | ,000      |
|                           | 403133203 | ,000      |
|                           | 403133204 | ,000      |
|                           | 403133315 | ,000      |
|                           | 403133322 | 1,000     |
|                           | 403133401 | ,000      |
|                           | 403133402 | ,000      |
|                           | 403133550 | ,000      |
|                           | 403133772 | ,000      |
|                           | 403135803 | ,000      |

1  
2  
3  
4  
5  
6  
7  
8  
9  
10  
11  
12  
13  
14  
15  
16  
17  
18  
19  
20  
21  
22  
23  
24  
25  
26  
27  
28  
29  
30  
31  
32  
33  
34  
35  
36  
37  
38  
39  
40  
41  
42  
43  
44  
45  
46  
47  
48  
49  
50  
51  
52  
53  
54  
55  
56  
57  
58  
59  
60

**Categorical Variables Codings**

|                           |           | Parameter |
|---------------------------|-----------|-----------|
|                           |           | (18)      |
| VASTY2 (SAIR*10000)+VASTY | 403073101 | ,000      |
|                           | 403073102 | ,000      |
|                           | 403073103 | ,000      |
|                           | 403073202 | ,000      |
|                           | 403073203 | ,000      |
|                           | 403073204 | ,000      |
|                           | 403073303 | ,000      |
|                           | 403073651 | ,000      |
|                           | 403073771 | ,000      |
|                           | 403133102 | ,000      |
|                           | 403133106 | ,000      |
|                           | 403133107 | ,000      |
|                           | 403133109 | ,000      |
|                           | 403133202 | ,000      |
|                           | 403133203 | ,000      |
|                           | 403133204 | ,000      |
|                           | 403133315 | ,000      |
|                           | 403133322 | ,000      |
|                           | 403133401 | 1,000     |
|                           | 403133402 | ,000      |
|                           | 403133550 | ,000      |
|                           | 403133772 | ,000      |
|                           | 403135803 | ,000      |

For peer review only

## Categorical Variables Codings

|                           |           | Parameter |
|---------------------------|-----------|-----------|
|                           |           | (19)      |
| VASTY2 (SAIR*10000)+VASTY | 403073101 | ,000      |
|                           | 403073102 | ,000      |
|                           | 403073103 | ,000      |
|                           | 403073202 | ,000      |
|                           | 403073203 | ,000      |
|                           | 403073204 | ,000      |
|                           | 403073303 | ,000      |
|                           | 403073651 | ,000      |
|                           | 403073771 | ,000      |
|                           | 403133102 | ,000      |
|                           | 403133106 | ,000      |
|                           | 403133107 | ,000      |
|                           | 403133109 | ,000      |
|                           | 403133202 | ,000      |
|                           | 403133203 | ,000      |
|                           | 403133204 | ,000      |
|                           | 403133315 | ,000      |
|                           | 403133322 | ,000      |
|                           | 403133401 | ,000      |
|                           | 403133402 | 1,000     |
|                           | 403133550 | ,000      |
|                           | 403133772 | ,000      |
|                           | 403135803 | ,000      |

1  
2  
3  
4  
5  
6  
7  
8  
9  
10  
11  
12  
13  
14  
15  
16  
17  
18  
19  
20  
21  
22  
23  
24  
25  
26  
27  
28  
29  
30  
31  
32  
33  
34  
35  
36  
37  
38  
39  
40  
41  
42  
43  
44  
45  
46  
47  
48  
49  
50  
51  
52  
53  
54  
55  
56  
57  
58  
59  
60

**Categorical Variables Codings**

|                           |           | Parameter |
|---------------------------|-----------|-----------|
|                           |           | (20)      |
| VASTY2 (SAIR*10000)+VASTY | 403073101 | ,000      |
|                           | 403073102 | ,000      |
|                           | 403073103 | ,000      |
|                           | 403073202 | ,000      |
|                           | 403073203 | ,000      |
|                           | 403073204 | ,000      |
|                           | 403073303 | ,000      |
|                           | 403073651 | ,000      |
|                           | 403073771 | ,000      |
|                           | 403133102 | ,000      |
|                           | 403133106 | ,000      |
|                           | 403133107 | ,000      |
|                           | 403133109 | ,000      |
|                           | 403133202 | ,000      |
|                           | 403133203 | ,000      |
|                           | 403133204 | ,000      |
|                           | 403133315 | ,000      |
|                           | 403133322 | ,000      |
|                           | 403133401 | ,000      |
|                           | 403133402 | ,000      |
|                           | 403133550 | 1,000     |
|                           | 403133772 | ,000      |
|                           | 403135803 | ,000      |

For peer review only

## Categorical Variables Codings

|                           |           | Parameter |
|---------------------------|-----------|-----------|
|                           |           | (21)      |
| VASTY2 (SAIR*10000)+VASTY | 403073101 | ,000      |
|                           | 403073102 | ,000      |
|                           | 403073103 | ,000      |
|                           | 403073202 | ,000      |
|                           | 403073203 | ,000      |
|                           | 403073204 | ,000      |
|                           | 403073303 | ,000      |
|                           | 403073651 | ,000      |
|                           | 403073771 | ,000      |
|                           | 403133102 | ,000      |
|                           | 403133106 | ,000      |
|                           | 403133107 | ,000      |
|                           | 403133109 | ,000      |
|                           | 403133202 | ,000      |
|                           | 403133203 | ,000      |
|                           | 403133204 | ,000      |
|                           | 403133315 | ,000      |
|                           | 403133322 | ,000      |
|                           | 403133401 | ,000      |
|                           | 403133402 | ,000      |
|                           | 403133550 | ,000      |
|                           | 403133772 | 1,000     |
|                           | 403135803 | ,000      |

1  
2  
3  
4  
5  
6  
7  
8  
9  
10  
11  
12  
13  
14  
15  
16  
17  
18  
19  
20  
21  
22  
23  
24  
25  
26  
27  
28  
29  
30  
31  
32  
33  
34  
35  
36  
37  
38  
39  
40  
41  
42  
43  
44  
45  
46  
47  
48  
49  
50  
51  
52  
53  
54  
55  
56  
57  
58  
59  
60

**Categorical Variables Codings**

|                           |           | Parameter |
|---------------------------|-----------|-----------|
|                           |           | (22)      |
| VASTY2 (SAIR*10000)+VASTY | 403073101 | ,000      |
|                           | 403073102 | ,000      |
|                           | 403073103 | ,000      |
|                           | 403073202 | ,000      |
|                           | 403073203 | ,000      |
|                           | 403073204 | ,000      |
|                           | 403073303 | ,000      |
|                           | 403073651 | ,000      |
|                           | 403073771 | ,000      |
|                           | 403133102 | ,000      |
|                           | 403133106 | ,000      |
|                           | 403133107 | ,000      |
|                           | 403133109 | ,000      |
|                           | 403133202 | ,000      |
|                           | 403133203 | ,000      |
|                           | 403133204 | ,000      |
|                           | 403133315 | ,000      |
|                           | 403133322 | ,000      |
|                           | 403133401 | ,000      |
|                           | 403133402 | ,000      |
|                           | 403133550 | ,000      |
|                           | 403133772 | ,000      |
|                           | 403135803 | 1,000     |

For peer review only

## Categorical Variables Codings

|                           |           | Parameter |
|---------------------------|-----------|-----------|
|                           |           | (23)      |
| VASTY2 (SAIR*10000)+VASTY | 403073101 | ,000      |
|                           | 403073102 | ,000      |
|                           | 403073103 | ,000      |
|                           | 403073202 | ,000      |
|                           | 403073203 | ,000      |
|                           | 403073204 | ,000      |
|                           | 403073303 | ,000      |
|                           | 403073651 | ,000      |
|                           | 403073771 | ,000      |
|                           | 403133102 | ,000      |
|                           | 403133106 | ,000      |
|                           | 403133107 | ,000      |
|                           | 403133109 | ,000      |
|                           | 403133202 | ,000      |
|                           | 403133203 | ,000      |
|                           | 403133204 | ,000      |
|                           | 403133315 | ,000      |
|                           | 403133322 | ,000      |
|                           | 403133401 | ,000      |
|                           | 403133402 | ,000      |
|                           | 403133550 | ,000      |
|                           | 403133772 | ,000      |
|                           | 403135803 | ,000      |



## Categorical Variables Codings

|                           |           | Parameter |
|---------------------------|-----------|-----------|
|                           |           | (24)      |
| VASTY2 (SAIR*10000)+VASTY | 403073101 | ,000      |
|                           | 403073102 | ,000      |
|                           | 403073103 | ,000      |
|                           | 403073202 | ,000      |
|                           | 403073203 | ,000      |
|                           | 403073204 | ,000      |
|                           | 403073303 | ,000      |
|                           | 403073651 | ,000      |
|                           | 403073771 | ,000      |
|                           | 403133102 | ,000      |
|                           | 403133106 | ,000      |
|                           | 403133107 | ,000      |
|                           | 403133109 | ,000      |
|                           | 403133202 | ,000      |
|                           | 403133203 | ,000      |
|                           | 403133204 | ,000      |
|                           | 403133315 | ,000      |
|                           | 403133322 | ,000      |
|                           | 403133401 | ,000      |
|                           | 403133402 | ,000      |
|                           | 403133550 | ,000      |
|                           | 403133772 | ,000      |
|                           | 403135803 | ,000      |

## Categorical Variables Codings

|                           |           | Parameter |
|---------------------------|-----------|-----------|
|                           |           | (25)      |
| VASTY2 (SAIR*10000)+VASTY | 403073101 | ,000      |
|                           | 403073102 | ,000      |
|                           | 403073103 | ,000      |
|                           | 403073202 | ,000      |
|                           | 403073203 | ,000      |
|                           | 403073204 | ,000      |
|                           | 403073303 | ,000      |
|                           | 403073651 | ,000      |
|                           | 403073771 | ,000      |
|                           | 403133102 | ,000      |
|                           | 403133106 | ,000      |
|                           | 403133107 | ,000      |
|                           | 403133109 | ,000      |
|                           | 403133202 | ,000      |
|                           | 403133203 | ,000      |
|                           | 403133204 | ,000      |
|                           | 403133315 | ,000      |
|                           | 403133322 | ,000      |
|                           | 403133401 | ,000      |
|                           | 403133402 | ,000      |
|                           | 403133550 | ,000      |
|                           | 403133772 | ,000      |
|                           | 403135803 | ,000      |

## Categorical Variables Codings

|                           |           | Parameter |
|---------------------------|-----------|-----------|
|                           |           | (26)      |
| VASTY2 (SAIR*10000)+VASTY | 403073101 | ,000      |
|                           | 403073102 | ,000      |
|                           | 403073103 | ,000      |
|                           | 403073202 | ,000      |
|                           | 403073203 | ,000      |
|                           | 403073204 | ,000      |
|                           | 403073303 | ,000      |
|                           | 403073651 | ,000      |
|                           | 403073771 | ,000      |
|                           | 403133102 | ,000      |
|                           | 403133106 | ,000      |
|                           | 403133107 | ,000      |
|                           | 403133109 | ,000      |
|                           | 403133202 | ,000      |
|                           | 403133203 | ,000      |
|                           | 403133204 | ,000      |
|                           | 403133315 | ,000      |
|                           | 403133322 | ,000      |
|                           | 403133401 | ,000      |
|                           | 403133402 | ,000      |
|                           | 403133550 | ,000      |
|                           | 403133772 | ,000      |
|                           | 403135803 | ,000      |

## Categorical Variables Codings

|                           |           | Parameter |
|---------------------------|-----------|-----------|
|                           |           | (27)      |
| VASTY2 (SAIR*10000)+VASTY | 403073101 | ,000      |
|                           | 403073102 | ,000      |
|                           | 403073103 | ,000      |
|                           | 403073202 | ,000      |
|                           | 403073203 | ,000      |
|                           | 403073204 | ,000      |
|                           | 403073303 | ,000      |
|                           | 403073651 | ,000      |
|                           | 403073771 | ,000      |
|                           | 403133102 | ,000      |
|                           | 403133106 | ,000      |
|                           | 403133107 | ,000      |
|                           | 403133109 | ,000      |
|                           | 403133202 | ,000      |
|                           | 403133203 | ,000      |
|                           | 403133204 | ,000      |
|                           | 403133315 | ,000      |
|                           | 403133322 | ,000      |
|                           | 403133401 | ,000      |
|                           | 403133402 | ,000      |
|                           | 403133550 | ,000      |
|                           | 403133772 | ,000      |
|                           | 403135803 | ,000      |

## Categorical Variables Codings

|                           |           | Parameter |
|---------------------------|-----------|-----------|
|                           |           | (28)      |
| VASTY2 (SAIR*10000)+VASTY | 403073101 | ,000      |
|                           | 403073102 | ,000      |
|                           | 403073103 | ,000      |
|                           | 403073202 | ,000      |
|                           | 403073203 | ,000      |
|                           | 403073204 | ,000      |
|                           | 403073303 | ,000      |
|                           | 403073651 | ,000      |
|                           | 403073771 | ,000      |
|                           | 403133102 | ,000      |
|                           | 403133106 | ,000      |
|                           | 403133107 | ,000      |
|                           | 403133109 | ,000      |
|                           | 403133202 | ,000      |
|                           | 403133203 | ,000      |
|                           | 403133204 | ,000      |
|                           | 403133315 | ,000      |
|                           | 403133322 | ,000      |
|                           | 403133401 | ,000      |
|                           | 403133402 | ,000      |
|                           | 403133550 | ,000      |
|                           | 403133772 | ,000      |
|                           | 403135803 | ,000      |

## Categorical Variables Codings

|                           |           | Parameter |
|---------------------------|-----------|-----------|
|                           |           | (29)      |
| VASTY2 (SAIR*10000)+VASTY | 403073101 | ,000      |
|                           | 403073102 | ,000      |
|                           | 403073103 | ,000      |
|                           | 403073202 | ,000      |
|                           | 403073203 | ,000      |
|                           | 403073204 | ,000      |
|                           | 403073303 | ,000      |
|                           | 403073651 | ,000      |
|                           | 403073771 | ,000      |
|                           | 403133102 | ,000      |
|                           | 403133106 | ,000      |
|                           | 403133107 | ,000      |
|                           | 403133109 | ,000      |
|                           | 403133202 | ,000      |
|                           | 403133203 | ,000      |
|                           | 403133204 | ,000      |
|                           | 403133315 | ,000      |
|                           | 403133322 | ,000      |
|                           | 403133401 | ,000      |
|                           | 403133402 | ,000      |
|                           | 403133550 | ,000      |
|                           | 403133772 | ,000      |
|                           | 403135803 | ,000      |

## Categorical Variables Codings

|                           |           | Parameter |
|---------------------------|-----------|-----------|
|                           |           | (30)      |
| VASTY2 (SAIR*10000)+VASTY | 403073101 | ,000      |
|                           | 403073102 | ,000      |
|                           | 403073103 | ,000      |
|                           | 403073202 | ,000      |
|                           | 403073203 | ,000      |
|                           | 403073204 | ,000      |
|                           | 403073303 | ,000      |
|                           | 403073651 | ,000      |
|                           | 403073771 | ,000      |
|                           | 403133102 | ,000      |
|                           | 403133106 | ,000      |
|                           | 403133107 | ,000      |
|                           | 403133109 | ,000      |
|                           | 403133202 | ,000      |
|                           | 403133203 | ,000      |
|                           | 403133204 | ,000      |
|                           | 403133315 | ,000      |
|                           | 403133322 | ,000      |
|                           | 403133401 | ,000      |
|                           | 403133402 | ,000      |
|                           | 403133550 | ,000      |
|                           | 403133772 | ,000      |
|                           | 403135803 | ,000      |

## Categorical Variables Codings

|                           |           | Parameter |
|---------------------------|-----------|-----------|
|                           |           | (31)      |
| VASTY2 (SAIR*10000)+VASTY | 403073101 | ,000      |
|                           | 403073102 | ,000      |
|                           | 403073103 | ,000      |
|                           | 403073202 | ,000      |
|                           | 403073203 | ,000      |
|                           | 403073204 | ,000      |
|                           | 403073303 | ,000      |
|                           | 403073651 | ,000      |
|                           | 403073771 | ,000      |
|                           | 403133102 | ,000      |
|                           | 403133106 | ,000      |
|                           | 403133107 | ,000      |
|                           | 403133109 | ,000      |
|                           | 403133202 | ,000      |
|                           | 403133203 | ,000      |
|                           | 403133204 | ,000      |
|                           | 403133315 | ,000      |
|                           | 403133322 | ,000      |
|                           | 403133401 | ,000      |
|                           | 403133402 | ,000      |
|                           | 403133550 | ,000      |
|                           | 403133772 | ,000      |
|                           | 403135803 | ,000      |



## Categorical Variables Codings

|                           |           | Parameter |
|---------------------------|-----------|-----------|
|                           |           | (32)      |
| VASTY2 (SAIR*10000)+VASTY | 403073101 | ,000      |
|                           | 403073102 | ,000      |
|                           | 403073103 | ,000      |
|                           | 403073202 | ,000      |
|                           | 403073203 | ,000      |
|                           | 403073204 | ,000      |
|                           | 403073303 | ,000      |
|                           | 403073651 | ,000      |
|                           | 403073771 | ,000      |
|                           | 403133102 | ,000      |
|                           | 403133106 | ,000      |
|                           | 403133107 | ,000      |
|                           | 403133109 | ,000      |
|                           | 403133202 | ,000      |
|                           | 403133203 | ,000      |
|                           | 403133204 | ,000      |
|                           | 403133315 | ,000      |
|                           | 403133322 | ,000      |
|                           | 403133401 | ,000      |
|                           | 403133402 | ,000      |
|                           | 403133550 | ,000      |
|                           | 403133772 | ,000      |
|                           | 403135803 | ,000      |

## Categorical Variables Codings

|                           |           | Parameter |
|---------------------------|-----------|-----------|
|                           |           | (33)      |
| VASTY2 (SAIR*10000)+VASTY | 403073101 | ,000      |
|                           | 403073102 | ,000      |
|                           | 403073103 | ,000      |
|                           | 403073202 | ,000      |
|                           | 403073203 | ,000      |
|                           | 403073204 | ,000      |
|                           | 403073303 | ,000      |
|                           | 403073651 | ,000      |
|                           | 403073771 | ,000      |
|                           | 403133102 | ,000      |
|                           | 403133106 | ,000      |
|                           | 403133107 | ,000      |
|                           | 403133109 | ,000      |
|                           | 403133202 | ,000      |
|                           | 403133203 | ,000      |
|                           | 403133204 | ,000      |
|                           | 403133315 | ,000      |
|                           | 403133322 | ,000      |
|                           | 403133401 | ,000      |
|                           | 403133402 | ,000      |
|                           | 403133550 | ,000      |
|                           | 403133772 | ,000      |
|                           | 403135803 | ,000      |

## Categorical Variables Codings

|                           |           | Parameter |
|---------------------------|-----------|-----------|
|                           |           | (34)      |
| VASTY2 (SAIR*10000)+VASTY | 403073101 | ,000      |
|                           | 403073102 | ,000      |
|                           | 403073103 | ,000      |
|                           | 403073202 | ,000      |
|                           | 403073203 | ,000      |
|                           | 403073204 | ,000      |
|                           | 403073303 | ,000      |
|                           | 403073651 | ,000      |
|                           | 403073771 | ,000      |
|                           | 403133102 | ,000      |
|                           | 403133106 | ,000      |
|                           | 403133107 | ,000      |
|                           | 403133109 | ,000      |
|                           | 403133202 | ,000      |
|                           | 403133203 | ,000      |
|                           | 403133204 | ,000      |
|                           | 403133315 | ,000      |
|                           | 403133322 | ,000      |
|                           | 403133401 | ,000      |
|                           | 403133402 | ,000      |
|                           | 403133550 | ,000      |
|                           | 403133772 | ,000      |
|                           | 403135803 | ,000      |

## Categorical Variables Codings

|                           |           | Paramete... |
|---------------------------|-----------|-------------|
|                           |           | (35)        |
| VASTY2 (SAIR*10000)+VASTY | 403073101 | ,000        |
|                           | 403073102 | ,000        |
|                           | 403073103 | ,000        |
|                           | 403073202 | ,000        |
|                           | 403073203 | ,000        |
|                           | 403073204 | ,000        |
|                           | 403073303 | ,000        |
|                           | 403073651 | ,000        |
|                           | 403073771 | ,000        |
|                           | 403133102 | ,000        |
|                           | 403133106 | ,000        |
|                           | 403133107 | ,000        |
|                           | 403133109 | ,000        |
|                           | 403133202 | ,000        |
|                           | 403133203 | ,000        |
|                           | 403133204 | ,000        |
|                           | 403133315 | ,000        |
|                           | 403133322 | ,000        |
|                           | 403133401 | ,000        |
|                           | 403133402 | ,000        |
|                           | 403133550 | ,000        |
|                           | 403133772 | ,000        |
|                           | 403135803 | ,000        |

## Categorical Variables Codings

|                                              |                                         | Frequency |
|----------------------------------------------|-----------------------------------------|-----------|
|                                              | 404060001                               | 365       |
|                                              | 404060002                               | 366       |
|                                              | 404310003                               | 291       |
|                                              | 404310004                               | 291       |
|                                              | 502300005                               | 366       |
|                                              | 502300006                               | 225       |
|                                              | 502300007                               | 366       |
|                                              | 502300214                               | 366       |
|                                              | 502300411                               | 366       |
|                                              | 502300415                               | 360       |
|                                              | 502300416                               | 363       |
|                                              | 502300811                               | 364       |
|                                              | 502300913                               | 315       |
| weekday veckodag                             | 1 måndag                                | 1805      |
|                                              | 2 tisdag                                | 1812      |
|                                              | 3 onsdag                                | 1800      |
|                                              | 4 torsdag                               | 1794      |
|                                              | 5 fredag                                | 1788      |
|                                              | 6 lördag                                | 1735      |
|                                              | 7 söndag                                | 1741      |
| season säsong/period                         | 1 januari-mars                          | 3182      |
|                                              | 2 april-maj                             | 2127      |
|                                              | 3 juni-augusti                          | 2911      |
|                                              | 4 september-oktober                     | 2144      |
|                                              | 5 november-december                     | 2111      |
| bv3 belasnting vs paoncil dubbla intervallet | 1 medelbelastning                       | 9121      |
|                                              | 2 underbelastning                       | 1505      |
|                                              | 3 överbelastning                        | 1849      |
| holiday större helg                          | 1 ingen större helg                     | 12078     |
|                                              | 2 större helg (påsk/midsommar/julonyår) | 397       |

## Categorical Variables Codings

|                                              |                                         | Parameter |
|----------------------------------------------|-----------------------------------------|-----------|
|                                              |                                         | (1)       |
|                                              | 404060001                               | ,000      |
|                                              | 404060002                               | ,000      |
|                                              | 404310003                               | ,000      |
|                                              | 404310004                               | ,000      |
|                                              | 502300005                               | ,000      |
|                                              | 502300006                               | ,000      |
|                                              | 502300007                               | ,000      |
|                                              | 502300214                               | ,000      |
|                                              | 502300411                               | ,000      |
|                                              | 502300415                               | ,000      |
|                                              | 502300416                               | ,000      |
|                                              | 502300811                               | ,000      |
|                                              | 502300913                               | ,000      |
| weekday veckodag                             | 1 måndag                                | ,000      |
|                                              | 2 tisdag                                | 1,000     |
|                                              | 3 onsdag                                | ,000      |
|                                              | 4 torsdag                               | ,000      |
|                                              | 5 fredag                                | ,000      |
|                                              | 6 lördag                                | ,000      |
|                                              | 7 söndag                                | ,000      |
| season säsong/period                         | 1 januari-mars                          | ,000      |
|                                              | 2 april-maj                             | 1,000     |
|                                              | 3 juni-augusti                          | ,000      |
|                                              | 4 september-oktober                     | ,000      |
|                                              | 5 november-december                     | ,000      |
| bv3 belasnting vs paoncil dubbla intervallet | 1 medelbelastning                       | ,000      |
|                                              | 2 underbelastning                       | 1,000     |
|                                              | 3 överbelastning                        | ,000      |
| holiday större helg                          | 1 ingen större helg                     | ,000      |
|                                              | 2 större helg (påsk/midsommar/julonyår) | 1,000     |

## Categorical Variables Codings

|                                              |                                         | Parameter |
|----------------------------------------------|-----------------------------------------|-----------|
|                                              |                                         | (2)       |
|                                              | 404060001                               | ,000      |
|                                              | 404060002                               | ,000      |
|                                              | 404310003                               | ,000      |
|                                              | 404310004                               | ,000      |
|                                              | 502300005                               | ,000      |
|                                              | 502300006                               | ,000      |
|                                              | 502300007                               | ,000      |
|                                              | 502300214                               | ,000      |
|                                              | 502300411                               | ,000      |
|                                              | 502300415                               | ,000      |
|                                              | 502300416                               | ,000      |
|                                              | 502300811                               | ,000      |
|                                              | 502300913                               | ,000      |
| weekday veckodag                             | 1 måndag                                | ,000      |
|                                              | 2 tisdag                                | ,000      |
|                                              | 3 onsdag                                | 1,000     |
|                                              | 4 torsdag                               | ,000      |
|                                              | 5 fredag                                | ,000      |
|                                              | 6 lördag                                | ,000      |
|                                              | 7 söndag                                | ,000      |
| season säsong/period                         | 1 januari-mars                          | ,000      |
|                                              | 2 april-maj                             | ,000      |
|                                              | 3 juni-augusti                          | 1,000     |
|                                              | 4 september-oktober                     | ,000      |
|                                              | 5 november-december                     | ,000      |
| bv3 belasnting vs paoncil dubbla intervallet | 1 medelbelastning                       | ,000      |
|                                              | 2 underbelastning                       | ,000      |
|                                              | 3 överbelastning                        | 1,000     |
| holiday större helg                          | 1 ingen större helg                     |           |
|                                              | 2 större helg (påsk/midsommar/julonyår) |           |

## Categorical Variables Codings

|                                              |                                         | Parameter |
|----------------------------------------------|-----------------------------------------|-----------|
|                                              |                                         | (3)       |
|                                              | 404060001                               | ,000      |
|                                              | 404060002                               | ,000      |
|                                              | 404310003                               | ,000      |
|                                              | 404310004                               | ,000      |
|                                              | 502300005                               | ,000      |
|                                              | 502300006                               | ,000      |
|                                              | 502300007                               | ,000      |
|                                              | 502300214                               | ,000      |
|                                              | 502300411                               | ,000      |
|                                              | 502300415                               | ,000      |
|                                              | 502300416                               | ,000      |
|                                              | 502300811                               | ,000      |
|                                              | 502300913                               | ,000      |
| weekday veckodag                             | 1 måndag                                | ,000      |
|                                              | 2 tisdag                                | ,000      |
|                                              | 3 onsdag                                | ,000      |
|                                              | 4 torsdag                               | 1,000     |
|                                              | 5 fredag                                | ,000      |
|                                              | 6 lördag                                | ,000      |
|                                              | 7 söndag                                | ,000      |
| season säsong/period                         | 1 januari-mars                          | ,000      |
|                                              | 2 april-maj                             | ,000      |
|                                              | 3 juni-augusti                          | ,000      |
|                                              | 4 september-oktober                     | 1,000     |
|                                              | 5 november-december                     | ,000      |
| bv3 belastning vs paoncil dubbla intervallet | 1 medelbelastning                       |           |
|                                              | 2 underbelastning                       |           |
|                                              | 3 överbelastning                        |           |
| holiday större helg                          | 1 ingen större helg                     |           |
|                                              | 2 större helg (påsk/midsommar/julonyår) |           |



## Categorical Variables Codings

|                                              |                                         | Parameter |
|----------------------------------------------|-----------------------------------------|-----------|
|                                              |                                         | (4)       |
|                                              | 404060001                               | ,000      |
|                                              | 404060002                               | ,000      |
|                                              | 404310003                               | ,000      |
|                                              | 404310004                               | ,000      |
|                                              | 502300005                               | ,000      |
|                                              | 502300006                               | ,000      |
|                                              | 502300007                               | ,000      |
|                                              | 502300214                               | ,000      |
|                                              | 502300411                               | ,000      |
|                                              | 502300415                               | ,000      |
|                                              | 502300416                               | ,000      |
|                                              | 502300811                               | ,000      |
|                                              | 502300913                               | ,000      |
| weekday veckodag                             | 1 måndag                                | ,000      |
|                                              | 2 tisdag                                | ,000      |
|                                              | 3 onsdag                                | ,000      |
|                                              | 4 torsdag                               | ,000      |
|                                              | 5 fredag                                | 1,000     |
|                                              | 6 lördag                                | ,000      |
|                                              | 7 söndag                                | ,000      |
| season säsong/period                         | 1 januari-mars                          | ,000      |
|                                              | 2 april-maj                             | ,000      |
|                                              | 3 juni-augusti                          | ,000      |
|                                              | 4 september-oktober                     | ,000      |
|                                              | 5 november-december                     | 1,000     |
| bv3 belasnting vs paoncil dubbla intervallet | 1 medelbelastning                       |           |
|                                              | 2 underbelastning                       |           |
|                                              | 3 överbelastning                        |           |
| holiday större helg                          | 1 ingen större helg                     |           |
|                                              | 2 större helg (påsk/midsommar/julonyår) |           |

## Categorical Variables Codings

|                                              |                                         | Parameter |
|----------------------------------------------|-----------------------------------------|-----------|
|                                              |                                         | (5)       |
|                                              | 404060001                               | ,000      |
|                                              | 404060002                               | ,000      |
|                                              | 404310003                               | ,000      |
|                                              | 404310004                               | ,000      |
|                                              | 502300005                               | ,000      |
|                                              | 502300006                               | ,000      |
|                                              | 502300007                               | ,000      |
|                                              | 502300214                               | ,000      |
|                                              | 502300411                               | ,000      |
|                                              | 502300415                               | ,000      |
|                                              | 502300416                               | ,000      |
|                                              | 502300811                               | ,000      |
|                                              | 502300913                               | ,000      |
| weekday veckodag                             | 1 måndag                                | ,000      |
|                                              | 2 tisdag                                | ,000      |
|                                              | 3 onsdag                                | ,000      |
|                                              | 4 torsdag                               | ,000      |
|                                              | 5 fredag                                | ,000      |
|                                              | 6 lördag                                | 1,000     |
|                                              | 7 söndag                                | ,000      |
| season säsong/period                         | 1 januari-mars                          |           |
|                                              | 2 april-maj                             |           |
|                                              | 3 juni-augusti                          |           |
|                                              | 4 september-oktober                     |           |
|                                              | 5 november-december                     |           |
| bv3 belastning vs paoncil dubbla intervallet | 1 medelbelastning                       |           |
|                                              | 2 underbelastning                       |           |
|                                              | 3 överbelastning                        |           |
| holiday större helg                          | 1 ingen större helg                     |           |
|                                              | 2 större helg (påsk/midsommar/julonyår) |           |

## Categorical Variables Codings

|                                              |                                         | Parameter |
|----------------------------------------------|-----------------------------------------|-----------|
|                                              |                                         | (6)       |
|                                              | 404060001                               | ,000      |
|                                              | 404060002                               | ,000      |
|                                              | 404310003                               | ,000      |
|                                              | 404310004                               | ,000      |
|                                              | 502300005                               | ,000      |
|                                              | 502300006                               | ,000      |
|                                              | 502300007                               | ,000      |
|                                              | 502300214                               | ,000      |
|                                              | 502300411                               | ,000      |
|                                              | 502300415                               | ,000      |
|                                              | 502300416                               | ,000      |
|                                              | 502300811                               | ,000      |
|                                              | 502300913                               | ,000      |
| weekday veckodag                             | 1 måndag                                | ,000      |
|                                              | 2 tisdag                                | ,000      |
|                                              | 3 onsdag                                | ,000      |
|                                              | 4 torsdag                               | ,000      |
|                                              | 5 fredag                                | ,000      |
|                                              | 6 lördag                                | ,000      |
|                                              | 7 söndag                                | 1,000     |
| season säsong/period                         | 1 januari-mars                          |           |
|                                              | 2 april-maj                             |           |
|                                              | 3 juni-augusti                          |           |
|                                              | 4 september-oktober                     |           |
|                                              | 5 november-december                     |           |
| bv3 belasnting vs paoncil dubbla intervallet | 1 medelbelastning                       |           |
|                                              | 2 underbelastning                       |           |
|                                              | 3 överbelastning                        |           |
| holiday större helg                          | 1 ingen större helg                     |           |
|                                              | 2 större helg (påsk/midsommar/julonyår) |           |

## Categorical Variables Codings

|                                              |                                         | Parameter |
|----------------------------------------------|-----------------------------------------|-----------|
|                                              |                                         | (7)       |
|                                              | 404060001                               | ,000      |
|                                              | 404060002                               | ,000      |
|                                              | 404310003                               | ,000      |
|                                              | 404310004                               | ,000      |
|                                              | 502300005                               | ,000      |
|                                              | 502300006                               | ,000      |
|                                              | 502300007                               | ,000      |
|                                              | 502300214                               | ,000      |
|                                              | 502300411                               | ,000      |
|                                              | 502300415                               | ,000      |
|                                              | 502300416                               | ,000      |
|                                              | 502300811                               | ,000      |
|                                              | 502300913                               | ,000      |
| weekday veckodag                             | 1 måndag                                |           |
|                                              | 2 tisdag                                |           |
|                                              | 3 onsdag                                |           |
|                                              | 4 torsdag                               |           |
|                                              | 5 fredag                                |           |
|                                              | 6 lördag                                |           |
|                                              | 7 söndag                                |           |
| season säsong/period                         | 1 januari-mars                          |           |
|                                              | 2 april-maj                             |           |
|                                              | 3 juni-augusti                          |           |
|                                              | 4 september-oktober                     |           |
|                                              | 5 november-december                     |           |
| bv3 belasnting vs paoncil dubbla intervallet | 1 medelbelastning                       |           |
|                                              | 2 underbelastning                       |           |
|                                              | 3 överbelastning                        |           |
| holiday större helg                          | 1 ingen större helg                     |           |
|                                              | 2 större helg (påsk/midsommar/julonyår) |           |

## Categorical Variables Codings

|                                              |                                         | Parameter |
|----------------------------------------------|-----------------------------------------|-----------|
|                                              |                                         | (8)       |
|                                              | 404060001                               | ,000      |
|                                              | 404060002                               | ,000      |
|                                              | 404310003                               | ,000      |
|                                              | 404310004                               | ,000      |
|                                              | 502300005                               | ,000      |
|                                              | 502300006                               | ,000      |
|                                              | 502300007                               | ,000      |
|                                              | 502300214                               | ,000      |
|                                              | 502300411                               | ,000      |
|                                              | 502300415                               | ,000      |
|                                              | 502300416                               | ,000      |
|                                              | 502300811                               | ,000      |
|                                              | 502300913                               | ,000      |
| weekday veckodag                             | 1 måndag                                |           |
|                                              | 2 tisdag                                |           |
|                                              | 3 onsdag                                |           |
|                                              | 4 torsdag                               |           |
|                                              | 5 fredag                                |           |
|                                              | 6 lördag                                |           |
|                                              | 7 söndag                                |           |
| season säsong/period                         | 1 januari-mars                          |           |
|                                              | 2 april-maj                             |           |
|                                              | 3 juni-augusti                          |           |
|                                              | 4 september-oktober                     |           |
|                                              | 5 november-december                     |           |
| bv3 belastning vs paoncil dubbla intervallet | 1 medelbelastning                       |           |
|                                              | 2 underbelastning                       |           |
|                                              | 3 överbelastning                        |           |
| holiday större helg                          | 1 ingen större helg                     |           |
|                                              | 2 större helg (påsk/midsommar/julonyår) |           |

## Categorical Variables Codings

|                                              |                                         | Parameter |
|----------------------------------------------|-----------------------------------------|-----------|
|                                              |                                         | (9)       |
|                                              | 404060001                               | ,000      |
|                                              | 404060002                               | ,000      |
|                                              | 404310003                               | ,000      |
|                                              | 404310004                               | ,000      |
|                                              | 502300005                               | ,000      |
|                                              | 502300006                               | ,000      |
|                                              | 502300007                               | ,000      |
|                                              | 502300214                               | ,000      |
|                                              | 502300411                               | ,000      |
|                                              | 502300415                               | ,000      |
|                                              | 502300416                               | ,000      |
|                                              | 502300811                               | ,000      |
|                                              | 502300913                               | ,000      |
| weekday veckodag                             | 1 måndag                                |           |
|                                              | 2 tisdag                                |           |
|                                              | 3 onsdag                                |           |
|                                              | 4 torsdag                               |           |
|                                              | 5 fredag                                |           |
|                                              | 6 lördag                                |           |
|                                              | 7 söndag                                |           |
| season säsong/period                         | 1 januari-mars                          |           |
|                                              | 2 april-maj                             |           |
|                                              | 3 juni-augusti                          |           |
|                                              | 4 september-oktober                     |           |
|                                              | 5 november-december                     |           |
| bv3 belastning vs paoncil dubbla intervallet | 1 medelbelastning                       |           |
|                                              | 2 underbelastning                       |           |
|                                              | 3 överbelastning                        |           |
| holiday större helg                          | 1 ingen större helg                     |           |
|                                              | 2 större helg (påsk/midsommar/julonyår) |           |

## Categorical Variables Codings

|                                              |                                         | Parameter |
|----------------------------------------------|-----------------------------------------|-----------|
|                                              |                                         | (10)      |
|                                              | 404060001                               | ,000      |
|                                              | 404060002                               | ,000      |
|                                              | 404310003                               | ,000      |
|                                              | 404310004                               | ,000      |
|                                              | 502300005                               | ,000      |
|                                              | 502300006                               | ,000      |
|                                              | 502300007                               | ,000      |
|                                              | 502300214                               | ,000      |
|                                              | 502300411                               | ,000      |
|                                              | 502300415                               | ,000      |
|                                              | 502300416                               | ,000      |
|                                              | 502300811                               | ,000      |
|                                              | 502300913                               | ,000      |
| weekday veckodag                             | 1 måndag                                |           |
|                                              | 2 tisdag                                |           |
|                                              | 3 onsdag                                |           |
|                                              | 4 torsdag                               |           |
|                                              | 5 fredag                                |           |
|                                              | 6 lördag                                |           |
|                                              | 7 söndag                                |           |
| season säsong/period                         | 1 januari-mars                          |           |
|                                              | 2 april-maj                             |           |
|                                              | 3 juni-augusti                          |           |
|                                              | 4 september-oktober                     |           |
|                                              | 5 november-december                     |           |
| bv3 belasnting vs paoncil dubbla intervallet | 1 medelbelastning                       |           |
|                                              | 2 underbelastning                       |           |
|                                              | 3 överbelastning                        |           |
| holiday större helg                          | 1 ingen större helg                     |           |
|                                              | 2 större helg (påsk/midsommar/julonyår) |           |

## Categorical Variables Codings

|                                              |                                         | Parameter |
|----------------------------------------------|-----------------------------------------|-----------|
|                                              |                                         | (11)      |
|                                              | 404060001                               | ,000      |
|                                              | 404060002                               | ,000      |
|                                              | 404310003                               | ,000      |
|                                              | 404310004                               | ,000      |
|                                              | 502300005                               | ,000      |
|                                              | 502300006                               | ,000      |
|                                              | 502300007                               | ,000      |
|                                              | 502300214                               | ,000      |
|                                              | 502300411                               | ,000      |
|                                              | 502300415                               | ,000      |
|                                              | 502300416                               | ,000      |
|                                              | 502300811                               | ,000      |
|                                              | 502300913                               | ,000      |
| weekday veckodag                             | 1 måndag                                |           |
|                                              | 2 tisdag                                |           |
|                                              | 3 onsdag                                |           |
|                                              | 4 torsdag                               |           |
|                                              | 5 fredag                                |           |
|                                              | 6 lördag                                |           |
|                                              | 7 söndag                                |           |
| season säsong/period                         | 1 januari-mars                          |           |
|                                              | 2 april-maj                             |           |
|                                              | 3 juni-augusti                          |           |
|                                              | 4 september-oktober                     |           |
|                                              | 5 november-december                     |           |
| bv3 belastning vs paoncil dubbla intervallet | 1 medelbelastning                       |           |
|                                              | 2 underbelastning                       |           |
|                                              | 3 överbelastning                        |           |
| holiday större helg                          | 1 ingen större helg                     |           |
|                                              | 2 större helg (påsk/midsommar/julonyår) |           |



## Categorical Variables Codings

|                                              |                                         | Parameter |
|----------------------------------------------|-----------------------------------------|-----------|
|                                              |                                         | (12)      |
|                                              | 404060001                               | ,000      |
|                                              | 404060002                               | ,000      |
|                                              | 404310003                               | ,000      |
|                                              | 404310004                               | ,000      |
|                                              | 502300005                               | ,000      |
|                                              | 502300006                               | ,000      |
|                                              | 502300007                               | ,000      |
|                                              | 502300214                               | ,000      |
|                                              | 502300411                               | ,000      |
|                                              | 502300415                               | ,000      |
|                                              | 502300416                               | ,000      |
|                                              | 502300811                               | ,000      |
|                                              | 502300913                               | ,000      |
| weekday veckodag                             | 1 måndag                                |           |
|                                              | 2 tisdag                                |           |
|                                              | 3 onsdag                                |           |
|                                              | 4 torsdag                               |           |
|                                              | 5 fredag                                |           |
|                                              | 6 lördag                                |           |
|                                              | 7 söndag                                |           |
| season säsong/period                         | 1 januari-mars                          |           |
|                                              | 2 april-maj                             |           |
|                                              | 3 juni-augusti                          |           |
|                                              | 4 september-oktober                     |           |
|                                              | 5 november-december                     |           |
| bv3 belasnting vs paoncil dubbla intervallet | 1 medelbelastning                       |           |
|                                              | 2 underbelastning                       |           |
|                                              | 3 överbelastning                        |           |
| holiday större helg                          | 1 ingen större helg                     |           |
|                                              | 2 större helg (påsk/midsommar/julonyår) |           |

## Categorical Variables Codings

|                                              |                                         | Parameter |
|----------------------------------------------|-----------------------------------------|-----------|
|                                              |                                         | (13)      |
|                                              | 404060001                               | ,000      |
|                                              | 404060002                               | ,000      |
|                                              | 404310003                               | ,000      |
|                                              | 404310004                               | ,000      |
|                                              | 502300005                               | ,000      |
|                                              | 502300006                               | ,000      |
|                                              | 502300007                               | ,000      |
|                                              | 502300214                               | ,000      |
|                                              | 502300411                               | ,000      |
|                                              | 502300415                               | ,000      |
|                                              | 502300416                               | ,000      |
|                                              | 502300811                               | ,000      |
|                                              | 502300913                               | ,000      |
| weekday veckodag                             | 1 måndag                                |           |
|                                              | 2 tisdag                                |           |
|                                              | 3 onsdag                                |           |
|                                              | 4 torsdag                               |           |
|                                              | 5 fredag                                |           |
|                                              | 6 lördag                                |           |
|                                              | 7 söndag                                |           |
| season säsong/period                         | 1 januari-mars                          |           |
|                                              | 2 april-maj                             |           |
|                                              | 3 juni-augusti                          |           |
|                                              | 4 september-oktober                     |           |
|                                              | 5 november-december                     |           |
| bv3 belastning vs paoncil dubbla intervallet | 1 medelbelastning                       |           |
|                                              | 2 underbelastning                       |           |
|                                              | 3 överbelastning                        |           |
| holiday större helg                          | 1 ingen större helg                     |           |
|                                              | 2 större helg (påsk/midsommar/julonyår) |           |

## Categorical Variables Codings

|                                              |                                         | Parameter |
|----------------------------------------------|-----------------------------------------|-----------|
|                                              |                                         | (14)      |
|                                              | 404060001                               | ,000      |
|                                              | 404060002                               | ,000      |
|                                              | 404310003                               | ,000      |
|                                              | 404310004                               | ,000      |
|                                              | 502300005                               | ,000      |
|                                              | 502300006                               | ,000      |
|                                              | 502300007                               | ,000      |
|                                              | 502300214                               | ,000      |
|                                              | 502300411                               | ,000      |
|                                              | 502300415                               | ,000      |
|                                              | 502300416                               | ,000      |
|                                              | 502300811                               | ,000      |
|                                              | 502300913                               | ,000      |
| weekday veckodag                             | 1 måndag                                |           |
|                                              | 2 tisdag                                |           |
|                                              | 3 onsdag                                |           |
|                                              | 4 torsdag                               |           |
|                                              | 5 fredag                                |           |
|                                              | 6 lördag                                |           |
|                                              | 7 söndag                                |           |
| season säsong/period                         | 1 januari-mars                          |           |
|                                              | 2 april-maj                             |           |
|                                              | 3 juni-augusti                          |           |
|                                              | 4 september-oktober                     |           |
|                                              | 5 november-december                     |           |
| bv3 belastning vs paoncil dubbla intervallet | 1 medelbelastning                       |           |
|                                              | 2 underbelastning                       |           |
|                                              | 3 överbelastning                        |           |
| holiday större helg                          | 1 ingen större helg                     |           |
|                                              | 2 större helg (påsk/midsommar/julonyår) |           |

## Categorical Variables Codings

|                                              |                                         | Parameter |
|----------------------------------------------|-----------------------------------------|-----------|
|                                              |                                         | (15)      |
|                                              | 404060001                               | ,000      |
|                                              | 404060002                               | ,000      |
|                                              | 404310003                               | ,000      |
|                                              | 404310004                               | ,000      |
|                                              | 502300005                               | ,000      |
|                                              | 502300006                               | ,000      |
|                                              | 502300007                               | ,000      |
|                                              | 502300214                               | ,000      |
|                                              | 502300411                               | ,000      |
|                                              | 502300415                               | ,000      |
|                                              | 502300416                               | ,000      |
|                                              | 502300811                               | ,000      |
|                                              | 502300913                               | ,000      |
| weekday veckodag                             | 1 måndag                                |           |
|                                              | 2 tisdag                                |           |
|                                              | 3 onsdag                                |           |
|                                              | 4 torsdag                               |           |
|                                              | 5 fredag                                |           |
|                                              | 6 lördag                                |           |
|                                              | 7 söndag                                |           |
| season säsong/period                         | 1 januari-mars                          |           |
|                                              | 2 april-maj                             |           |
|                                              | 3 juni-augusti                          |           |
|                                              | 4 september-oktober                     |           |
|                                              | 5 november-december                     |           |
| bv3 belastning vs paoncil dubbla intervallet | 1 medelbelastning                       |           |
|                                              | 2 underbelastning                       |           |
|                                              | 3 överbelastning                        |           |
| holiday större helg                          | 1 ingen större helg                     |           |
|                                              | 2 större helg (påsk/midsommar/julonyår) |           |

## Categorical Variables Codings

|                                              |                                         | Parameter |
|----------------------------------------------|-----------------------------------------|-----------|
|                                              |                                         | (16)      |
|                                              | 404060001                               | ,000      |
|                                              | 404060002                               | ,000      |
|                                              | 404310003                               | ,000      |
|                                              | 404310004                               | ,000      |
|                                              | 502300005                               | ,000      |
|                                              | 502300006                               | ,000      |
|                                              | 502300007                               | ,000      |
|                                              | 502300214                               | ,000      |
|                                              | 502300411                               | ,000      |
|                                              | 502300415                               | ,000      |
|                                              | 502300416                               | ,000      |
|                                              | 502300811                               | ,000      |
|                                              | 502300913                               | ,000      |
| weekday veckodag                             | 1 måndag                                |           |
|                                              | 2 tisdag                                |           |
|                                              | 3 onsdag                                |           |
|                                              | 4 torsdag                               |           |
|                                              | 5 fredag                                |           |
|                                              | 6 lördag                                |           |
|                                              | 7 söndag                                |           |
| season säsong/period                         | 1 januari-mars                          |           |
|                                              | 2 april-maj                             |           |
|                                              | 3 juni-augusti                          |           |
|                                              | 4 september-oktober                     |           |
|                                              | 5 november-december                     |           |
| bv3 belasnting vs paoncil dubbla intervallet | 1 medelbelastning                       |           |
|                                              | 2 underbelastning                       |           |
|                                              | 3 överbelastning                        |           |
| holiday större helg                          | 1 ingen större helg                     |           |
|                                              | 2 större helg (påsk/midsommar/julonyår) |           |

## Categorical Variables Codings

|                                              |                                         | Parameter |
|----------------------------------------------|-----------------------------------------|-----------|
|                                              |                                         | (17)      |
|                                              | 404060001                               | ,000      |
|                                              | 404060002                               | ,000      |
|                                              | 404310003                               | ,000      |
|                                              | 404310004                               | ,000      |
|                                              | 502300005                               | ,000      |
|                                              | 502300006                               | ,000      |
|                                              | 502300007                               | ,000      |
|                                              | 502300214                               | ,000      |
|                                              | 502300411                               | ,000      |
|                                              | 502300415                               | ,000      |
|                                              | 502300416                               | ,000      |
|                                              | 502300811                               | ,000      |
|                                              | 502300913                               | ,000      |
| weekday veckodag                             | 1 måndag                                |           |
|                                              | 2 tisdag                                |           |
|                                              | 3 onsdag                                |           |
|                                              | 4 torsdag                               |           |
|                                              | 5 fredag                                |           |
|                                              | 6 lördag                                |           |
|                                              | 7 söndag                                |           |
| season säsong/period                         | 1 januari-mars                          |           |
|                                              | 2 april-maj                             |           |
|                                              | 3 juni-augusti                          |           |
|                                              | 4 september-oktober                     |           |
|                                              | 5 november-december                     |           |
| bv3 belastning vs paoncil dubbla intervallet | 1 medelbelastning                       |           |
|                                              | 2 underbelastning                       |           |
|                                              | 3 överbelastning                        |           |
| holiday större helg                          | 1 ingen större helg                     |           |
|                                              | 2 större helg (påsk/midsommar/julonyår) |           |

## Categorical Variables Codings

|                                              |                                         | Parameter |
|----------------------------------------------|-----------------------------------------|-----------|
|                                              |                                         | (18)      |
|                                              | 404060001                               | ,000      |
|                                              | 404060002                               | ,000      |
|                                              | 404310003                               | ,000      |
|                                              | 404310004                               | ,000      |
|                                              | 502300005                               | ,000      |
|                                              | 502300006                               | ,000      |
|                                              | 502300007                               | ,000      |
|                                              | 502300214                               | ,000      |
|                                              | 502300411                               | ,000      |
|                                              | 502300415                               | ,000      |
|                                              | 502300416                               | ,000      |
|                                              | 502300811                               | ,000      |
|                                              | 502300913                               | ,000      |
| weekday veckodag                             | 1 måndag                                |           |
|                                              | 2 tisdag                                |           |
|                                              | 3 onsdag                                |           |
|                                              | 4 torsdag                               |           |
|                                              | 5 fredag                                |           |
|                                              | 6 lördag                                |           |
|                                              | 7 söndag                                |           |
| season säsong/period                         | 1 januari-mars                          |           |
|                                              | 2 april-maj                             |           |
|                                              | 3 juni-augusti                          |           |
|                                              | 4 september-oktober                     |           |
|                                              | 5 november-december                     |           |
| bv3 belastning vs paoncil dubbla intervallet | 1 medelbelastning                       |           |
|                                              | 2 underbelastning                       |           |
|                                              | 3 överbelastning                        |           |
| holiday större helg                          | 1 ingen större helg                     |           |
|                                              | 2 större helg (påsk/midsommar/julonyår) |           |

## Categorical Variables Codings

|                                              |                                         | Parameter |
|----------------------------------------------|-----------------------------------------|-----------|
|                                              |                                         | (19)      |
|                                              | 404060001                               | ,000      |
|                                              | 404060002                               | ,000      |
|                                              | 404310003                               | ,000      |
|                                              | 404310004                               | ,000      |
|                                              | 502300005                               | ,000      |
|                                              | 502300006                               | ,000      |
|                                              | 502300007                               | ,000      |
|                                              | 502300214                               | ,000      |
|                                              | 502300411                               | ,000      |
|                                              | 502300415                               | ,000      |
|                                              | 502300416                               | ,000      |
|                                              | 502300811                               | ,000      |
|                                              | 502300913                               | ,000      |
| weekday veckodag                             | 1 måndag                                |           |
|                                              | 2 tisdag                                |           |
|                                              | 3 onsdag                                |           |
|                                              | 4 torsdag                               |           |
|                                              | 5 fredag                                |           |
|                                              | 6 lördag                                |           |
|                                              | 7 söndag                                |           |
| season säsong/period                         | 1 januari-mars                          |           |
|                                              | 2 april-maj                             |           |
|                                              | 3 juni-augusti                          |           |
|                                              | 4 september-oktober                     |           |
|                                              | 5 november-december                     |           |
| bv3 belastning vs paoncil dubbla intervallet | 1 medelbelastning                       |           |
|                                              | 2 underbelastning                       |           |
|                                              | 3 överbelastning                        |           |
| holiday större helg                          | 1 ingen större helg                     |           |
|                                              | 2 större helg (påsk/midsommar/julonyår) |           |



## Categorical Variables Codings

|                                              |                                         | Parameter |
|----------------------------------------------|-----------------------------------------|-----------|
|                                              |                                         | (20)      |
|                                              | 404060001                               | ,000      |
|                                              | 404060002                               | ,000      |
|                                              | 404310003                               | ,000      |
|                                              | 404310004                               | ,000      |
|                                              | 502300005                               | ,000      |
|                                              | 502300006                               | ,000      |
|                                              | 502300007                               | ,000      |
|                                              | 502300214                               | ,000      |
|                                              | 502300411                               | ,000      |
|                                              | 502300415                               | ,000      |
|                                              | 502300416                               | ,000      |
|                                              | 502300811                               | ,000      |
|                                              | 502300913                               | ,000      |
| weekday veckodag                             | 1 måndag                                |           |
|                                              | 2 tisdag                                |           |
|                                              | 3 onsdag                                |           |
|                                              | 4 torsdag                               |           |
|                                              | 5 fredag                                |           |
|                                              | 6 lördag                                |           |
|                                              | 7 söndag                                |           |
| season säsong/period                         | 1 januari-mars                          |           |
|                                              | 2 april-maj                             |           |
|                                              | 3 juni-augusti                          |           |
|                                              | 4 september-oktober                     |           |
|                                              | 5 november-december                     |           |
| bv3 belastning vs paoncil dubbla intervallet | 1 medelbelastning                       |           |
|                                              | 2 underbelastning                       |           |
|                                              | 3 överbelastning                        |           |
| holiday större helg                          | 1 ingen större helg                     |           |
|                                              | 2 större helg (påsk/midsommar/julonyår) |           |

## Categorical Variables Codings

|                                              |                                         | Parameter |
|----------------------------------------------|-----------------------------------------|-----------|
|                                              |                                         | (21)      |
|                                              | 404060001                               | ,000      |
|                                              | 404060002                               | ,000      |
|                                              | 404310003                               | ,000      |
|                                              | 404310004                               | ,000      |
|                                              | 502300005                               | ,000      |
|                                              | 502300006                               | ,000      |
|                                              | 502300007                               | ,000      |
|                                              | 502300214                               | ,000      |
|                                              | 502300411                               | ,000      |
|                                              | 502300415                               | ,000      |
|                                              | 502300416                               | ,000      |
|                                              | 502300811                               | ,000      |
|                                              | 502300913                               | ,000      |
| weekday veckodag                             | 1 måndag                                |           |
|                                              | 2 tisdag                                |           |
|                                              | 3 onsdag                                |           |
|                                              | 4 torsdag                               |           |
|                                              | 5 fredag                                |           |
|                                              | 6 lördag                                |           |
|                                              | 7 söndag                                |           |
| season säsong/period                         | 1 januari-mars                          |           |
|                                              | 2 april-maj                             |           |
|                                              | 3 juni-augusti                          |           |
|                                              | 4 september-oktober                     |           |
|                                              | 5 november-december                     |           |
| bv3 belastning vs paoncil dubbla intervallet | 1 medelbelastning                       |           |
|                                              | 2 underbelastning                       |           |
|                                              | 3 överbelastning                        |           |
| holiday större helg                          | 1 ingen större helg                     |           |
|                                              | 2 större helg (påsk/midsommar/julonyår) |           |

## Categorical Variables Codings

|                                              |                                         | Parameter |
|----------------------------------------------|-----------------------------------------|-----------|
|                                              |                                         | (22)      |
|                                              | 404060001                               | ,000      |
|                                              | 404060002                               | ,000      |
|                                              | 404310003                               | ,000      |
|                                              | 404310004                               | ,000      |
|                                              | 502300005                               | ,000      |
|                                              | 502300006                               | ,000      |
|                                              | 502300007                               | ,000      |
|                                              | 502300214                               | ,000      |
|                                              | 502300411                               | ,000      |
|                                              | 502300415                               | ,000      |
|                                              | 502300416                               | ,000      |
|                                              | 502300811                               | ,000      |
|                                              | 502300913                               | ,000      |
| weekday veckodag                             | 1 måndag                                |           |
|                                              | 2 tisdag                                |           |
|                                              | 3 onsdag                                |           |
|                                              | 4 torsdag                               |           |
|                                              | 5 fredag                                |           |
|                                              | 6 lördag                                |           |
|                                              | 7 söndag                                |           |
| season säsong/period                         | 1 januari-mars                          |           |
|                                              | 2 april-maj                             |           |
|                                              | 3 juni-augusti                          |           |
|                                              | 4 september-oktober                     |           |
|                                              | 5 november-december                     |           |
| bv3 belasnting vs paoncil dubbla intervallet | 1 medelbelastning                       |           |
|                                              | 2 underbelastning                       |           |
|                                              | 3 överbelastning                        |           |
| holiday större helg                          | 1 ingen större helg                     |           |
|                                              | 2 större helg (påsk/midsommar/julonyår) |           |

## Categorical Variables Codings

|                                              |                                         | Parameter |
|----------------------------------------------|-----------------------------------------|-----------|
|                                              |                                         | (23)      |
|                                              | 404060001                               | 1,000     |
|                                              | 404060002                               | ,000      |
|                                              | 404310003                               | ,000      |
|                                              | 404310004                               | ,000      |
|                                              | 502300005                               | ,000      |
|                                              | 502300006                               | ,000      |
|                                              | 502300007                               | ,000      |
|                                              | 502300214                               | ,000      |
|                                              | 502300411                               | ,000      |
|                                              | 502300415                               | ,000      |
|                                              | 502300416                               | ,000      |
|                                              | 502300811                               | ,000      |
|                                              | 502300913                               | ,000      |
| weekday veckodag                             | 1 måndag                                |           |
|                                              | 2 tisdag                                |           |
|                                              | 3 onsdag                                |           |
|                                              | 4 torsdag                               |           |
|                                              | 5 fredag                                |           |
|                                              | 6 lördag                                |           |
|                                              | 7 söndag                                |           |
| season säsong/period                         | 1 januari-mars                          |           |
|                                              | 2 april-maj                             |           |
|                                              | 3 juni-augusti                          |           |
|                                              | 4 september-oktober                     |           |
|                                              | 5 november-december                     |           |
| bv3 belasnting vs paoncil dubbla intervallet | 1 medelbelastning                       |           |
|                                              | 2 underbelastning                       |           |
|                                              | 3 överbelastning                        |           |
| holiday större helg                          | 1 ingen större helg                     |           |
|                                              | 2 större helg (påsk/midsommar/julonyår) |           |

## Categorical Variables Codings

|                                              |                                         | Parameter |
|----------------------------------------------|-----------------------------------------|-----------|
|                                              |                                         | (24)      |
|                                              | 404060001                               | ,000      |
|                                              | 404060002                               | 1,000     |
|                                              | 404310003                               | ,000      |
|                                              | 404310004                               | ,000      |
|                                              | 502300005                               | ,000      |
|                                              | 502300006                               | ,000      |
|                                              | 502300007                               | ,000      |
|                                              | 502300214                               | ,000      |
|                                              | 502300411                               | ,000      |
|                                              | 502300415                               | ,000      |
|                                              | 502300416                               | ,000      |
|                                              | 502300811                               | ,000      |
|                                              | 502300913                               | ,000      |
| weekday veckodag                             | 1 måndag                                |           |
|                                              | 2 tisdag                                |           |
|                                              | 3 onsdag                                |           |
|                                              | 4 torsdag                               |           |
|                                              | 5 fredag                                |           |
|                                              | 6 lördag                                |           |
|                                              | 7 söndag                                |           |
| season säsong/period                         | 1 januari-mars                          |           |
|                                              | 2 april-maj                             |           |
|                                              | 3 juni-augusti                          |           |
|                                              | 4 september-oktober                     |           |
|                                              | 5 november-december                     |           |
| bv3 belastning vs paoncil dubbla intervallet | 1 medelbelastning                       |           |
|                                              | 2 underbelastning                       |           |
|                                              | 3 överbelastning                        |           |
| holiday större helg                          | 1 ingen större helg                     |           |
|                                              | 2 större helg (påsk/midsommar/julonyår) |           |

## Categorical Variables Codings

|                                              |                                         | Parameter |
|----------------------------------------------|-----------------------------------------|-----------|
|                                              |                                         | (25)      |
|                                              | 404060001                               | ,000      |
|                                              | 404060002                               | ,000      |
|                                              | 404310003                               | 1,000     |
|                                              | 404310004                               | ,000      |
|                                              | 502300005                               | ,000      |
|                                              | 502300006                               | ,000      |
|                                              | 502300007                               | ,000      |
|                                              | 502300214                               | ,000      |
|                                              | 502300411                               | ,000      |
|                                              | 502300415                               | ,000      |
|                                              | 502300416                               | ,000      |
|                                              | 502300811                               | ,000      |
|                                              | 502300913                               | ,000      |
| weekday veckodag                             | 1 måndag                                |           |
|                                              | 2 tisdag                                |           |
|                                              | 3 onsdag                                |           |
|                                              | 4 torsdag                               |           |
|                                              | 5 fredag                                |           |
|                                              | 6 lördag                                |           |
|                                              | 7 söndag                                |           |
| season säsong/period                         | 1 januari-mars                          |           |
|                                              | 2 april-maj                             |           |
|                                              | 3 juni-augusti                          |           |
|                                              | 4 september-oktober                     |           |
|                                              | 5 november-december                     |           |
| bv3 belastning vs paoncil dubbla intervallet | 1 medelbelastning                       |           |
|                                              | 2 underbelastning                       |           |
|                                              | 3 överbelastning                        |           |
| holiday större helg                          | 1 ingen större helg                     |           |
|                                              | 2 större helg (påsk/midsommar/julonyår) |           |

## Categorical Variables Codings

|                                              |                                         | Parameter |
|----------------------------------------------|-----------------------------------------|-----------|
|                                              |                                         | (26)      |
|                                              | 404060001                               | ,000      |
|                                              | 404060002                               | ,000      |
|                                              | 404310003                               | ,000      |
|                                              | 404310004                               | 1,000     |
|                                              | 502300005                               | ,000      |
|                                              | 502300006                               | ,000      |
|                                              | 502300007                               | ,000      |
|                                              | 502300214                               | ,000      |
|                                              | 502300411                               | ,000      |
|                                              | 502300415                               | ,000      |
|                                              | 502300416                               | ,000      |
|                                              | 502300811                               | ,000      |
|                                              | 502300913                               | ,000      |
| weekday veckodag                             | 1 måndag                                |           |
|                                              | 2 tisdag                                |           |
|                                              | 3 onsdag                                |           |
|                                              | 4 torsdag                               |           |
|                                              | 5 fredag                                |           |
|                                              | 6 lördag                                |           |
|                                              | 7 söndag                                |           |
| season säsong/period                         | 1 januari-mars                          |           |
|                                              | 2 april-maj                             |           |
|                                              | 3 juni-augusti                          |           |
|                                              | 4 september-oktober                     |           |
|                                              | 5 november-december                     |           |
| bv3 belastning vs paoncil dubbla intervallet | 1 medelbelastning                       |           |
|                                              | 2 underbelastning                       |           |
|                                              | 3 överbelastning                        |           |
| holiday större helg                          | 1 ingen större helg                     |           |
|                                              | 2 större helg (påsk/midsommar/julonyår) |           |

## Categorical Variables Codings

|                                              |                                         | Parameter |
|----------------------------------------------|-----------------------------------------|-----------|
|                                              |                                         | (27)      |
|                                              | 404060001                               | ,000      |
|                                              | 404060002                               | ,000      |
|                                              | 404310003                               | ,000      |
|                                              | 404310004                               | ,000      |
|                                              | 502300005                               | 1,000     |
|                                              | 502300006                               | ,000      |
|                                              | 502300007                               | ,000      |
|                                              | 502300214                               | ,000      |
|                                              | 502300411                               | ,000      |
|                                              | 502300415                               | ,000      |
|                                              | 502300416                               | ,000      |
|                                              | 502300811                               | ,000      |
|                                              | 502300913                               | ,000      |
| weekday veckodag                             | 1 måndag                                |           |
|                                              | 2 tisdag                                |           |
|                                              | 3 onsdag                                |           |
|                                              | 4 torsdag                               |           |
|                                              | 5 fredag                                |           |
|                                              | 6 lördag                                |           |
|                                              | 7 söndag                                |           |
| season säsong/period                         | 1 januari-mars                          |           |
|                                              | 2 april-maj                             |           |
|                                              | 3 juni-augusti                          |           |
|                                              | 4 september-oktober                     |           |
|                                              | 5 november-december                     |           |
| bv3 belasnting vs paoncil dubbla intervallet | 1 medelbelastning                       |           |
|                                              | 2 underbelastning                       |           |
|                                              | 3 överbelastning                        |           |
| holiday större helg                          | 1 ingen större helg                     |           |
|                                              | 2 större helg (påsk/midsommar/julonyår) |           |



## Categorical Variables Codings

|                                              |                                         | Parameter |
|----------------------------------------------|-----------------------------------------|-----------|
|                                              |                                         | (28)      |
|                                              | 404060001                               | ,000      |
|                                              | 404060002                               | ,000      |
|                                              | 404310003                               | ,000      |
|                                              | 404310004                               | ,000      |
|                                              | 502300005                               | ,000      |
|                                              | 502300006                               | 1,000     |
|                                              | 502300007                               | ,000      |
|                                              | 502300214                               | ,000      |
|                                              | 502300411                               | ,000      |
|                                              | 502300415                               | ,000      |
|                                              | 502300416                               | ,000      |
|                                              | 502300811                               | ,000      |
|                                              | 502300913                               | ,000      |
| weekday veckodag                             | 1 måndag                                |           |
|                                              | 2 tisdag                                |           |
|                                              | 3 onsdag                                |           |
|                                              | 4 torsdag                               |           |
|                                              | 5 fredag                                |           |
|                                              | 6 lördag                                |           |
|                                              | 7 söndag                                |           |
| season säsong/period                         | 1 januari-mars                          |           |
|                                              | 2 april-maj                             |           |
|                                              | 3 juni-augusti                          |           |
|                                              | 4 september-oktober                     |           |
|                                              | 5 november-december                     |           |
| bv3 belasnting vs paoncil dubbla intervallet | 1 medelbelastning                       |           |
|                                              | 2 underbelastning                       |           |
|                                              | 3 överbelastning                        |           |
| holiday större helg                          | 1 ingen större helg                     |           |
|                                              | 2 större helg (påsk/midsommar/julonyår) |           |

## Categorical Variables Codings

|                                              |                                         | Parameter |
|----------------------------------------------|-----------------------------------------|-----------|
|                                              |                                         | (29)      |
|                                              | 404060001                               | ,000      |
|                                              | 404060002                               | ,000      |
|                                              | 404310003                               | ,000      |
|                                              | 404310004                               | ,000      |
|                                              | 502300005                               | ,000      |
|                                              | 502300006                               | ,000      |
|                                              | 502300007                               | 1,000     |
|                                              | 502300214                               | ,000      |
|                                              | 502300411                               | ,000      |
|                                              | 502300415                               | ,000      |
|                                              | 502300416                               | ,000      |
|                                              | 502300811                               | ,000      |
|                                              | 502300913                               | ,000      |
| weekday veckodag                             | 1 måndag                                |           |
|                                              | 2 tisdag                                |           |
|                                              | 3 onsdag                                |           |
|                                              | 4 torsdag                               |           |
|                                              | 5 fredag                                |           |
|                                              | 6 lördag                                |           |
|                                              | 7 söndag                                |           |
| season säsong/period                         | 1 januari-mars                          |           |
|                                              | 2 april-maj                             |           |
|                                              | 3 juni-augusti                          |           |
|                                              | 4 september-oktober                     |           |
|                                              | 5 november-december                     |           |
| bv3 belasnting vs paoncil dubbla intervallet | 1 medelbelastning                       |           |
|                                              | 2 underbelastning                       |           |
|                                              | 3 överbelastning                        |           |
| holiday större helg                          | 1 ingen större helg                     |           |
|                                              | 2 större helg (påsk/midsommar/julonyår) |           |

## Categorical Variables Codings

|                                              |                                         | Parameter |
|----------------------------------------------|-----------------------------------------|-----------|
|                                              |                                         | (30)      |
|                                              | 404060001                               | ,000      |
|                                              | 404060002                               | ,000      |
|                                              | 404310003                               | ,000      |
|                                              | 404310004                               | ,000      |
|                                              | 502300005                               | ,000      |
|                                              | 502300006                               | ,000      |
|                                              | 502300007                               | ,000      |
|                                              | 502300214                               | 1,000     |
|                                              | 502300411                               | ,000      |
|                                              | 502300415                               | ,000      |
|                                              | 502300416                               | ,000      |
|                                              | 502300811                               | ,000      |
|                                              | 502300913                               | ,000      |
| weekday veckodag                             | 1 måndag                                |           |
|                                              | 2 tisdag                                |           |
|                                              | 3 onsdag                                |           |
|                                              | 4 torsdag                               |           |
|                                              | 5 fredag                                |           |
|                                              | 6 lördag                                |           |
|                                              | 7 söndag                                |           |
| season säsong/period                         | 1 januari-mars                          |           |
|                                              | 2 april-maj                             |           |
|                                              | 3 juni-augusti                          |           |
|                                              | 4 september-oktober                     |           |
|                                              | 5 november-december                     |           |
| bv3 belasnting vs paoncil dubbla intervallet | 1 medelbelastning                       |           |
|                                              | 2 underbelastning                       |           |
|                                              | 3 överbelastning                        |           |
| holiday större helg                          | 1 ingen större helg                     |           |
|                                              | 2 större helg (påsk/midsommar/julonyår) |           |

## Categorical Variables Codings

|                                              |                                         | Parameter |
|----------------------------------------------|-----------------------------------------|-----------|
|                                              |                                         | (31)      |
|                                              | 404060001                               | ,000      |
|                                              | 404060002                               | ,000      |
|                                              | 404310003                               | ,000      |
|                                              | 404310004                               | ,000      |
|                                              | 502300005                               | ,000      |
|                                              | 502300006                               | ,000      |
|                                              | 502300007                               | ,000      |
|                                              | 502300214                               | ,000      |
|                                              | 502300411                               | 1,000     |
|                                              | 502300415                               | ,000      |
|                                              | 502300416                               | ,000      |
|                                              | 502300811                               | ,000      |
|                                              | 502300913                               | ,000      |
| weekday veckodag                             | 1 måndag                                |           |
|                                              | 2 tisdag                                |           |
|                                              | 3 onsdag                                |           |
|                                              | 4 torsdag                               |           |
|                                              | 5 fredag                                |           |
|                                              | 6 lördag                                |           |
|                                              | 7 söndag                                |           |
| season säsong/period                         | 1 januari-mars                          |           |
|                                              | 2 april-maj                             |           |
|                                              | 3 juni-augusti                          |           |
|                                              | 4 september-oktober                     |           |
|                                              | 5 november-december                     |           |
| bv3 belasnting vs paoncil dubbla intervallet | 1 medelbelastning                       |           |
|                                              | 2 underbelastning                       |           |
|                                              | 3 överbelastning                        |           |
| holiday större helg                          | 1 ingen större helg                     |           |
|                                              | 2 större helg (påsk/midsommar/julonyår) |           |

## Categorical Variables Codings

|                                              |                                         | Parameter |
|----------------------------------------------|-----------------------------------------|-----------|
|                                              |                                         | (32)      |
|                                              | 404060001                               | ,000      |
|                                              | 404060002                               | ,000      |
|                                              | 404310003                               | ,000      |
|                                              | 404310004                               | ,000      |
|                                              | 502300005                               | ,000      |
|                                              | 502300006                               | ,000      |
|                                              | 502300007                               | ,000      |
|                                              | 502300214                               | ,000      |
|                                              | 502300411                               | ,000      |
|                                              | 502300415                               | 1,000     |
|                                              | 502300416                               | ,000      |
|                                              | 502300811                               | ,000      |
|                                              | 502300913                               | ,000      |
| weekday veckodag                             | 1 måndag                                |           |
|                                              | 2 tisdag                                |           |
|                                              | 3 onsdag                                |           |
|                                              | 4 torsdag                               |           |
|                                              | 5 fredag                                |           |
|                                              | 6 lördag                                |           |
|                                              | 7 söndag                                |           |
| season säsong/period                         | 1 januari-mars                          |           |
|                                              | 2 april-maj                             |           |
|                                              | 3 juni-augusti                          |           |
|                                              | 4 september-oktober                     |           |
|                                              | 5 november-december                     |           |
| bv3 belasnting vs paoncil dubbla intervallet | 1 medelbelastning                       |           |
|                                              | 2 underbelastning                       |           |
|                                              | 3 överbelastning                        |           |
| holiday större helg                          | 1 ingen större helg                     |           |
|                                              | 2 större helg (påsk/midsommar/julonyår) |           |

## Categorical Variables Codings

|                                              |                                         | Parameter |
|----------------------------------------------|-----------------------------------------|-----------|
|                                              |                                         | (33)      |
|                                              | 404060001                               | ,000      |
|                                              | 404060002                               | ,000      |
|                                              | 404310003                               | ,000      |
|                                              | 404310004                               | ,000      |
|                                              | 502300005                               | ,000      |
|                                              | 502300006                               | ,000      |
|                                              | 502300007                               | ,000      |
|                                              | 502300214                               | ,000      |
|                                              | 502300411                               | ,000      |
|                                              | 502300415                               | ,000      |
|                                              | 502300416                               | 1,000     |
|                                              | 502300811                               | ,000      |
|                                              | 502300913                               | ,000      |
| weekday veckodag                             | 1 måndag                                |           |
|                                              | 2 tisdag                                |           |
|                                              | 3 onsdag                                |           |
|                                              | 4 torsdag                               |           |
|                                              | 5 fredag                                |           |
|                                              | 6 lördag                                |           |
|                                              | 7 söndag                                |           |
| season säsong/period                         | 1 januari-mars                          |           |
|                                              | 2 april-maj                             |           |
|                                              | 3 juni-augusti                          |           |
|                                              | 4 september-oktober                     |           |
|                                              | 5 november-december                     |           |
| bv3 belasnting vs paoncil dubbla intervallet | 1 medelbelastning                       |           |
|                                              | 2 underbelastning                       |           |
|                                              | 3 överbelastning                        |           |
| holiday större helg                          | 1 ingen större helg                     |           |
|                                              | 2 större helg (påsk/midsommar/julonyår) |           |

## Categorical Variables Codings

|                                              |                                         | Parameter |
|----------------------------------------------|-----------------------------------------|-----------|
|                                              |                                         | (34)      |
|                                              | 404060001                               | ,000      |
|                                              | 404060002                               | ,000      |
|                                              | 404310003                               | ,000      |
|                                              | 404310004                               | ,000      |
|                                              | 502300005                               | ,000      |
|                                              | 502300006                               | ,000      |
|                                              | 502300007                               | ,000      |
|                                              | 502300214                               | ,000      |
|                                              | 502300411                               | ,000      |
|                                              | 502300415                               | ,000      |
|                                              | 502300416                               | ,000      |
|                                              | 502300811                               | 1,000     |
|                                              | 502300913                               | ,000      |
| weekday veckodag                             | 1 måndag                                |           |
|                                              | 2 tisdag                                |           |
|                                              | 3 onsdag                                |           |
|                                              | 4 torsdag                               |           |
|                                              | 5 fredag                                |           |
|                                              | 6 lördag                                |           |
|                                              | 7 söndag                                |           |
| season säsong/period                         | 1 januari-mars                          |           |
|                                              | 2 april-maj                             |           |
|                                              | 3 juni-augusti                          |           |
|                                              | 4 september-oktober                     |           |
|                                              | 5 november-december                     |           |
| bv3 belasnting vs paoncil dubbla intervallet | 1 medelbelastning                       |           |
|                                              | 2 underbelastning                       |           |
|                                              | 3 överbelastning                        |           |
| holiday större helg                          | 1 ingen större helg                     |           |
|                                              | 2 större helg (påsk/midsommar/julonyår) |           |

## Categorical Variables Codings

|                                              |                                         | Paramete... |
|----------------------------------------------|-----------------------------------------|-------------|
|                                              |                                         | (35)        |
|                                              | 404060001                               | ,000        |
|                                              | 404060002                               | ,000        |
|                                              | 404310003                               | ,000        |
|                                              | 404310004                               | ,000        |
|                                              | 502300005                               | ,000        |
|                                              | 502300006                               | ,000        |
|                                              | 502300007                               | ,000        |
|                                              | 502300214                               | ,000        |
|                                              | 502300411                               | ,000        |
|                                              | 502300415                               | ,000        |
|                                              | 502300416                               | ,000        |
|                                              | 502300811                               | ,000        |
|                                              | 502300913                               | 1,000       |
| weekday veckodag                             | 1 måndag                                |             |
|                                              | 2 tisdag                                |             |
|                                              | 3 onsdag                                |             |
|                                              | 4 torsdag                               |             |
|                                              | 5 fredag                                |             |
|                                              | 6 lördag                                |             |
|                                              | 7 söndag                                |             |
| season säsong/period                         | 1 januari-mars                          |             |
|                                              | 2 april-maj                             |             |
|                                              | 3 juni-augusti                          |             |
|                                              | 4 september-oktober                     |             |
|                                              | 5 november-december                     |             |
| bv3 belasnting vs paoncil dubbla intervallet | 1 medelbelastning                       |             |
|                                              | 2 underbelastning                       |             |
|                                              | 3 överbelastning                        |             |
| holiday större helg                          | 1 ingen större helg                     |             |
|                                              | 2 större helg (påsk/midsommar/julonyår) |             |

**Block 0: Beginning Block**



Classification Table<sup>a,b</sup>

| Observed           |                                |                           | Predicted                 |                      |
|--------------------|--------------------------------|---------------------------|---------------------------|----------------------|
|                    |                                |                           | 0 ingen eller en händelse | 1 mer än en händelse |
| Step 0             | handlt1 händelse larger than 1 | 0 ingen eller en händelse | 12229                     | 0                    |
|                    |                                | 1 mer än en händelse      | 246                       | 0                    |
| Overall Percentage |                                |                           |                           |                      |

Classification Table<sup>a,b</sup>

| Observed           |                                |                           | Predicted          |
|--------------------|--------------------------------|---------------------------|--------------------|
|                    |                                |                           | Percentage Correct |
| Step 0             | handlt1 händelse larger than 1 | 0 ingen eller en händelse | 100,0              |
|                    |                                | 1 mer än en händelse      | ,0                 |
| Overall Percentage |                                |                           | 98,0               |

a. Constant is included in the model.

b. The cut value is ,500

Variables in the Equation

|                 | B      | S.E. | Wald     | df | Sig. | Exp(B) |
|-----------------|--------|------|----------|----|------|--------|
| Step 0 Constant | -3,906 | ,064 | 3679,612 | 1  | ,000 | ,020   |

## Variables not in the Equation

|        |           |            | Score   | df | Sig. |
|--------|-----------|------------|---------|----|------|
| Step 0 | Variables | bv3        | 5,341   | 2  | ,069 |
|        |           | bv3(1)     | 5,331   | 1  | ,021 |
|        |           | bv3(2)     | ,212    | 1  | ,645 |
|        |           | VASTY2     | 211,294 | 35 | ,000 |
|        |           | VASTY2(1)  | ,109    | 1  | ,741 |
|        |           | VASTY2(2)  | 2,111   | 1  | ,146 |
|        |           | VASTY2(3)  | 5,608   | 1  | ,018 |
|        |           | VASTY2(4)  | ,094    | 1  | ,759 |
|        |           | VASTY2(5)  | 1,981   | 1  | ,159 |
|        |           | VASTY2(6)  | 7,542   | 1  | ,006 |
|        |           | VASTY2(7)  | 3,478   | 1  | ,062 |
|        |           | VASTY2(8)  | ,006    | 1  | ,940 |
|        |           | VASTY2(9)  | ,082    | 1  | ,775 |
|        |           | VASTY2(10) | 36,459  | 1  | ,000 |
|        |           | VASTY2(11) | 27,814  | 1  | ,000 |
|        |           | VASTY2(12) | 2,573   | 1  | ,109 |
|        |           | VASTY2(13) | ,705    | 1  | ,401 |
|        |           | VASTY2(14) | ,209    | 1  | ,647 |
|        |           | VASTY2(15) | ,209    | 1  | ,647 |
|        |           | VASTY2(16) | ,071    | 1  | ,789 |
|        |           | VASTY2(17) | 7,564   | 1  | ,006 |
|        |           | VASTY2(18) | 7,500   | 1  | ,006 |
|        |           | VASTY2(19) | 5,608   | 1  | ,018 |
|        |           | VASTY2(20) | 1,471   | 1  | ,225 |
|        |           | VASTY2(21) | 2,573   | 1  | ,109 |
|        |           | VASTY2(22) | ,474    | 1  | ,491 |
|        |           | VASTY2(23) | 41,219  | 1  | ,000 |
|        |           | VASTY2(24) | 20,216  | 1  | ,000 |
|        |           | VASTY2(25) | ,290    | 1  | ,590 |
|        |           | VASTY2(26) | ,550    | 1  | ,458 |
|        |           | VASTY2(27) | 5,629   | 1  | ,018 |
|        |           | VASTY2(28) | 2,766   | 1  | ,096 |
|        |           | VASTY2(29) | 7,585   | 1  | ,006 |
|        |           | VASTY2(30) | ,089    | 1  | ,765 |
|        |           | VASTY2(31) | 8,820   | 1  | ,003 |
|        |           | VASTY2(32) | ,652    | 1  | ,419 |
|        |           | VASTY2(33) | 1,464   | 1  | ,226 |
|        |           | VASTY2(34) | 5,587   | 1  | ,018 |
|        |           | VASTY2(35) | 7,764   | 1  | ,005 |
|        |           | weekday    | 3,270   | 6  | ,774 |
|        |           | weekday(1) | ,002    | 1  | ,961 |
|        |           | weekday(2) | ,075    | 1  | ,784 |
|        |           | weekday(3) | ,720    | 1  | ,396 |

**Variables not in the Equation**

|                    | Score   | df | Sig. |
|--------------------|---------|----|------|
| weekday(4)         | ,019    | 1  | ,892 |
| weekday(5)         | 2,336   | 1  | ,126 |
| weekday(6)         | ,004    | 1  | ,951 |
| holiday(1)         | 3,138   | 1  | ,076 |
| season             | 6,828   | 4  | ,145 |
| season(1)          | ,483    | 1  | ,487 |
| season(2)          | 3,014   | 1  | ,083 |
| season(3)          | 4,003   | 1  | ,045 |
| season(4)          | ,934    | 1  | ,334 |
| Overall Statistics | 225,874 | 48 | ,000 |

**Block 1: Method = Enter**

**Omnibus Tests of Model Coefficients**

|             | Chi-square | df | Sig. |
|-------------|------------|----|------|
| Step 1 Step | 224,832    | 48 | ,000 |
| Block       | 224,832    | 48 | ,000 |
| Model       | 224,832    | 48 | ,000 |

**Model Summary**

| Step | -2 Log likelihood     | Cox & Snell R Square | Nagelkerke R Square |
|------|-----------------------|----------------------|---------------------|
| 1    | 2193,951 <sup>a</sup> | ,018                 | ,101                |

a. Estimation terminated at iteration number 20 because maximum iterations has been reached. Final solution cannot be found.

**Classification Table<sup>a</sup>**

|                    |                               | Predicted                 |                      |
|--------------------|-------------------------------|---------------------------|----------------------|
|                    |                               | 0 ingen eller en händelse | 1 mer än en händelse |
| Observed           | handt1 händelse larger than 1 | 12229                     | 0                    |
|                    |                               | 246                       | 0                    |
| Overall Percentage |                               |                           |                      |

**Classification Table<sup>a</sup>**

|                    |                               | Predicted          |
|--------------------|-------------------------------|--------------------|
|                    |                               | Percentage Correct |
| Observed           | handt1 händelse larger than 1 | 100,0              |
|                    |                               | ,0                 |
| Overall Percentage |                               | 98,0               |

a. The cut value is ,500

## Variables in the Equation

|                         | B       | S.E.     | Wald    | df | Sig. | Exp(B) |
|-------------------------|---------|----------|---------|----|------|--------|
| Step 1 <sup>a</sup> bv3 |         |          | 2,604   | 2  | ,272 |        |
| bv3(1)                  | -,422   | ,262     | 2,592   | 1  | ,107 | ,656   |
| bv3(2)                  | -,054   | ,196     | ,075    | 1  | ,784 | ,948   |
| VASTY2                  |         |          | 118,563 | 35 | ,000 |        |
| VASTY2(1)               | ,519    | ,576     | ,811    | 1  | ,368 | 1,680  |
| VASTY2(2)               | ,795    | ,545     | 2,127   | 1  | ,145 | 2,214  |
| VASTY2(3)               | -1,630  | 1,100    | 2,197   | 1  | ,138 | ,196   |
| VASTY2(4)               | ,475    | ,578     | ,676    | 1  | ,411 | 1,609  |
| VASTY2(5)               | -,430   | ,735     | ,342    | 1  | ,559 | ,651   |
| VASTY2(6)               | -16,906 | 2096,940 | ,000    | 1  | ,994 | ,000   |
| VASTY2(7)               | ,916    | ,549     | 2,786   | 1  | ,095 | 2,500  |
| VASTY2(8)               | ,331    | ,591     | ,314    | 1  | ,575 | 1,393  |
| VASTY2(9)               | ,237    | ,611     | ,151    | 1  | ,698 | 1,268  |
| VASTY2(10)              | 1,560   | ,500     | 9,739   | 1  | ,002 | 4,757  |
| VASTY2(11)              | 1,495   | ,504     | 8,801   | 1  | ,003 | 4,461  |
| VASTY2(12)              | -,533   | ,734     | ,526    | 1  | ,468 | ,587   |
| VASTY2(13)              | -,017   | ,638     | ,001    | 1  | ,978 | ,983   |
| VASTY2(14)              | ,186    | ,611     | ,093    | 1  | ,761 | 1,204  |
| VASTY2(15)              | ,176    | ,611     | ,083    | 1  | ,774 | 1,192  |
| VASTY2(16)              | ,157    | ,740     | ,045    | 1  | ,832 | 1,170  |
| VASTY2(17)              | -16,892 | 2092,116 | ,000    | 1  | ,994 | ,000   |
| VASTY2(18)              | -16,881 | 2100,924 | ,000    | 1  | ,994 | ,000   |
| VASTY2(19)              | -1,387  | 1,107    | 1,570   | 1  | ,210 | ,250   |
| VASTY2(20)              | -,351   | ,737     | ,227    | 1  | ,634 | ,704   |
| VASTY2(21)              | -,516   | ,734     | ,493    | 1  | ,483 | ,597   |
| VASTY2(22)              | ,636    | ,563     | 1,272   | 1  | ,259 | 1,888  |
| VASTY2(23)              | 1,627   | ,498     | 10,668  | 1  | ,001 | 5,089  |
| VASTY2(24)              | 1,337   | ,511     | 6,841   | 1  | ,009 | 3,809  |
| VASTY2(25)              | ,544    | ,592     | ,844    | 1  | ,358 | 1,722  |
| VASTY2(26)              | -,046   | ,677     | ,005    | 1  | ,945 | ,955   |
| VASTY2(27)              | -1,633  | 1,099    | 2,210   | 1  | ,137 | ,195   |
| VASTY2(28)              | -1,230  | 1,100    | 1,252   | 1  | ,263 | ,292   |
| VASTY2(29)              | -16,968 | 2095,762 | ,000    | 1  | ,994 | ,000   |
| VASTY2(30)              | ,434    | ,576     | ,567    | 1  | ,451 | 1,543  |
| VASTY2(31)              | 1,180   | ,526     | 5,037   | 1  | ,025 | 3,255  |
| VASTY2(32)              | ,100    | ,641     | ,024    | 1  | ,876 | 1,105  |
| VASTY2(33)              | -,155   | ,677     | ,052    | 1  | ,819 | ,856   |
| VASTY2(34)              | -1,651  | 1,098    | 2,261   | 1  | ,133 | ,192   |
| VASTY2(35)              | 1,097   | ,538     | 4,159   | 1  | ,041 | 2,995  |
| weekday                 |         |          | 2,959   | 6  | ,814 |        |

## Variables in the Equation

|                     |            | 95% C.I. for EXP(B) |        |
|---------------------|------------|---------------------|--------|
|                     |            | Lower               | Upper  |
| Step 1 <sup>a</sup> | bv3        |                     |        |
|                     | bv3(1)     | ,393                | 1,096  |
|                     | bv3(2)     | ,645                | 1,392  |
|                     | VASTY2     |                     |        |
|                     | VASTY2(1)  | ,544                | 5,190  |
|                     | VASTY2(2)  | ,761                | 6,442  |
|                     | VASTY2(3)  | ,023                | 1,692  |
|                     | VASTY2(4)  | ,518                | 4,995  |
|                     | VASTY2(5)  | ,154                | 2,747  |
|                     | VASTY2(6)  | ,000                | .      |
|                     | VASTY2(7)  | ,852                | 7,331  |
|                     | VASTY2(8)  | ,437                | 4,434  |
|                     | VASTY2(9)  | ,383                | 4,201  |
|                     | VASTY2(10) | 1,786               | 12,668 |
|                     | VASTY2(11) | 1,661               | 11,982 |
|                     | VASTY2(12) | ,139                | 2,476  |
|                     | VASTY2(13) | ,281                | 3,435  |
|                     | VASTY2(14) | ,364                | 3,988  |
|                     | VASTY2(15) | ,360                | 3,944  |
|                     | VASTY2(16) | ,274                | 4,988  |
|                     | VASTY2(17) | ,000                | .      |
|                     | VASTY2(18) | ,000                | .      |
|                     | VASTY2(19) | ,029                | 2,187  |
|                     | VASTY2(20) | ,166                | 2,984  |
|                     | VASTY2(21) | ,142                | 2,519  |
|                     | VASTY2(22) | ,626                | 5,697  |
|                     | VASTY2(23) | 1,917               | 13,512 |
|                     | VASTY2(24) | 1,398               | 10,374 |
|                     | VASTY2(25) | ,540                | 5,495  |
|                     | VASTY2(26) | ,253                | 3,595  |
|                     | VASTY2(27) | ,023                | 1,682  |
|                     | VASTY2(28) | ,034                | 2,522  |
|                     | VASTY2(29) | ,000                | .      |
|                     | VASTY2(30) | ,499                | 4,768  |
|                     | VASTY2(31) | 1,161               | 9,126  |
|                     | VASTY2(32) | ,315                | 3,883  |
|                     | VASTY2(33) | ,227                | 3,230  |
|                     | VASTY2(34) | ,022                | 1,651  |
|                     | VASTY2(35) | 1,044               | 8,595  |
|                     | weekday    |                     |        |

Variables in the Equation

|            | B      | S.E. | Wald   | df | Sig. | Exp(B) |
|------------|--------|------|--------|----|------|--------|
| weekday(1) | -,126  | ,235 | ,289   | 1  | ,591 | ,882   |
| weekday(2) | -,186  | ,238 | ,609   | 1  | ,435 | ,830   |
| weekday(3) | -,007  | ,229 | ,001   | 1  | ,976 | ,993   |
| weekday(4) | -,091  | ,235 | ,151   | 1  | ,697 | ,913   |
| weekday(5) | -,384  | ,257 | 2,234  | 1  | ,135 | ,681   |
| weekday(6) | -,110  | ,239 | ,211   | 1  | ,646 | ,896   |
| holiday(1) | -,802  | ,595 | 1,815  | 1  | ,178 | ,448   |
| season     |        |      | 5,945  | 4  | ,203 |        |
| season(1)  | ,060   | ,198 | ,091   | 1  | ,763 | 1,061  |
| season(2)  | -,258  | ,199 | 1,681  | 1  | ,195 | ,773   |
| season(3)  | ,219   | ,189 | 1,334  | 1  | ,248 | 1,245  |
| season(4)  | -,113  | ,213 | ,278   | 1  | ,598 | ,894   |
| Constant   | -4,072 | ,487 | 69,792 | 1  | ,000 | ,017   |

Variables in the Equation

|            | 95% C.I. for EXP(B) |       |
|------------|---------------------|-------|
|            | Lower               | Upper |
| weekday(1) | ,557                | 1,396 |
| weekday(2) | ,521                | 1,324 |
| weekday(3) | ,634                | 1,555 |
| weekday(4) | ,576                | 1,446 |
| weekday(5) | ,412                | 1,127 |
| weekday(6) | ,561                | 1,431 |
| holiday(1) | ,140                | 1,440 |
| season     |                     |       |
| season(1)  | ,720                | 1,564 |
| season(2)  | ,523                | 1,141 |
| season(3)  | ,859                | 1,804 |
| season(4)  | ,588                | 1,358 |
| Constant   |                     |       |

a. Variable(s) entered on step 1: bv3, VASTY2, weekday, holiday, season.

```
LOGISTIC REGRESSION VARIABLES handlt1
/METHOD=ENTER sv3 VASTY2 weekday holiday season
/CONTRAST (sv3)=Indicator(1)
/CONTRAST (VASTY2)=Indicator(1)
/CONTRAST (weekday)=Indicator(1)
/CONTRAST (holiday)=Indicator(1)
/CONTRAST (season)=Indicator(1)
/PRINT=CI(95)
/CRITERIA=PIN(0.05) POUT(0.10) ITERATE(20) CUT(0.5).
```

## Logistic Regression

[DataSet6] C:\cWordjan\Rafaela\_VCS\alla\_tillsammans\abo\_bjo\_vasa\_v1.sav

### Case Processing Summary

| Unweighted Cases <sup>a</sup> |                      | N     | Percent |
|-------------------------------|----------------------|-------|---------|
| Selected Cases                | Included in Analysis | 12475 | 100,0   |
|                               | Missing Cases        | 0     | ,0      |
|                               | Total                | 12475 | 100,0   |
| Unselected Cases              |                      | 0     | ,0      |
| Total                         |                      | 12475 | 100,0   |

a. If weight is in effect, see classification table for the total number of cases.

### Dependent Variable Encoding

| Original Value            | Internal Value |
|---------------------------|----------------|
| 0 ingen eller en händelse | 0              |
| 1 mer än en händelse      | 1              |

### Categorical Variables Codings

|                           |           | Frequency | Parameter<br>(1) |
|---------------------------|-----------|-----------|------------------|
| VASTY2 (SAIR*10000)+VASTY | 403073101 | 365       | ,000             |
|                           | 403073102 | 362       | 1,000            |
|                           | 403073103 | 365       | ,000             |
|                           | 403073202 | 365       | ,000             |
|                           | 403073203 | 365       | ,000             |
|                           | 403073204 | 330       | ,000             |
|                           | 403073303 | 364       | ,000             |
|                           | 403073651 | 362       | ,000             |
|                           | 403073771 | 365       | ,000             |
|                           | 403133102 | 341       | ,000             |
|                           | 403133106 | 365       | ,000             |
|                           | 403133107 | 365       | ,000             |
|                           | 403133109 | 365       | ,000             |
|                           | 403133202 | 365       | ,000             |
|                           | 403133203 | 365       | ,000             |
|                           | 403133204 | 365       | ,000             |
|                           | 403133315 | 177       | ,000             |
|                           | 403133322 | 365       | ,000             |
|                           | 403133401 | 362       | ,000             |
|                           | 403133402 | 365       | ,000             |
| 403133550                 | 298       | ,000      |                  |
| 403133772                 | 365       | ,000      |                  |
| 403135803                 | 365       | ,000      |                  |

## Categorical Variables Codings

|                           |           | Parameter coding |       |
|---------------------------|-----------|------------------|-------|
|                           |           | (2)              | (3)   |
| VASTY2 (SAIR*10000)+VASTY | 403073101 | ,000             | ,000  |
|                           | 403073102 | ,000             | ,000  |
|                           | 403073103 | 1,000            | ,000  |
|                           | 403073202 | ,000             | 1,000 |
|                           | 403073203 | ,000             | ,000  |
|                           | 403073204 | ,000             | ,000  |
|                           | 403073303 | ,000             | ,000  |
|                           | 403073651 | ,000             | ,000  |
|                           | 403073771 | ,000             | ,000  |
|                           | 403133102 | ,000             | ,000  |
|                           | 403133106 | ,000             | ,000  |
|                           | 403133107 | ,000             | ,000  |
|                           | 403133109 | ,000             | ,000  |
|                           | 403133202 | ,000             | ,000  |
|                           | 403133203 | ,000             | ,000  |
|                           | 403133204 | ,000             | ,000  |
|                           | 403133315 | ,000             | ,000  |
|                           | 403133322 | ,000             | ,000  |
|                           | 403133401 | ,000             | ,000  |
|                           | 403133402 | ,000             | ,000  |
|                           | 403133550 | ,000             | ,000  |
|                           | 403133772 | ,000             | ,000  |
|                           | 403135803 | ,000             | ,000  |



**Categorical Variables Codings**

|                           |           | Parameter coding |       |
|---------------------------|-----------|------------------|-------|
|                           |           | (4)              | (5)   |
| VASTY2 (SAIR*10000)+VASTY | 403073101 | ,000             | ,000  |
|                           | 403073102 | ,000             | ,000  |
|                           | 403073103 | ,000             | ,000  |
|                           | 403073202 | ,000             | ,000  |
|                           | 403073203 | 1,000            | ,000  |
|                           | 403073204 | ,000             | 1,000 |
|                           | 403073303 | ,000             | ,000  |
|                           | 403073651 | ,000             | ,000  |
|                           | 403073771 | ,000             | ,000  |
|                           | 403133102 | ,000             | ,000  |
|                           | 403133106 | ,000             | ,000  |
|                           | 403133107 | ,000             | ,000  |
|                           | 403133109 | ,000             | ,000  |
|                           | 403133202 | ,000             | ,000  |
|                           | 403133203 | ,000             | ,000  |
|                           | 403133204 | ,000             | ,000  |
|                           | 403133315 | ,000             | ,000  |
|                           | 403133322 | ,000             | ,000  |
|                           | 403133401 | ,000             | ,000  |
|                           | 403133402 | ,000             | ,000  |
|                           | 403133550 | ,000             | ,000  |
|                           | 403133772 | ,000             | ,000  |
|                           | 403135803 | ,000             | ,000  |

Peer review only

## Categorical Variables Codings

|                           |           | Parameter coding |       |
|---------------------------|-----------|------------------|-------|
|                           |           | (6)              | (7)   |
| VASTY2 (SAIR*10000)+VASTY | 403073101 | ,000             | ,000  |
|                           | 403073102 | ,000             | ,000  |
|                           | 403073103 | ,000             | ,000  |
|                           | 403073202 | ,000             | ,000  |
|                           | 403073203 | ,000             | ,000  |
|                           | 403073204 | ,000             | ,000  |
|                           | 403073303 | 1,000            | ,000  |
|                           | 403073651 | ,000             | 1,000 |
|                           | 403073771 | ,000             | ,000  |
|                           | 403133102 | ,000             | ,000  |
|                           | 403133106 | ,000             | ,000  |
|                           | 403133107 | ,000             | ,000  |
|                           | 403133109 | ,000             | ,000  |
|                           | 403133202 | ,000             | ,000  |
|                           | 403133203 | ,000             | ,000  |
|                           | 403133204 | ,000             | ,000  |
|                           | 403133315 | ,000             | ,000  |
|                           | 403133322 | ,000             | ,000  |
|                           | 403133401 | ,000             | ,000  |
|                           | 403133402 | ,000             | ,000  |
|                           | 403133550 | ,000             | ,000  |
|                           | 403133772 | ,000             | ,000  |
|                           | 403135803 | ,000             | ,000  |

## Categorical Variables Codings

|                           |           | Parameter coding |       |
|---------------------------|-----------|------------------|-------|
|                           |           | (8)              | (9)   |
| VASTY2 (SAIR*10000)+VASTY | 403073101 | ,000             | ,000  |
|                           | 403073102 | ,000             | ,000  |
|                           | 403073103 | ,000             | ,000  |
|                           | 403073202 | ,000             | ,000  |
|                           | 403073203 | ,000             | ,000  |
|                           | 403073204 | ,000             | ,000  |
|                           | 403073303 | ,000             | ,000  |
|                           | 403073651 | ,000             | ,000  |
|                           | 403073771 | 1,000            | ,000  |
|                           | 403133102 | ,000             | 1,000 |
|                           | 403133106 | ,000             | ,000  |
|                           | 403133107 | ,000             | ,000  |
|                           | 403133109 | ,000             | ,000  |
|                           | 403133202 | ,000             | ,000  |
|                           | 403133203 | ,000             | ,000  |
|                           | 403133204 | ,000             | ,000  |
|                           | 403133315 | ,000             | ,000  |
|                           | 403133322 | ,000             | ,000  |
|                           | 403133401 | ,000             | ,000  |
|                           | 403133402 | ,000             | ,000  |
|                           | 403133550 | ,000             | ,000  |
|                           | 403133772 | ,000             | ,000  |
|                           | 403135803 | ,000             | ,000  |

## Categorical Variables Codings

|                           |           | Parameter coding |       |
|---------------------------|-----------|------------------|-------|
|                           |           | (10)             | (11)  |
| VASTY2 (SAIR*10000)+VASTY | 403073101 | ,000             | ,000  |
|                           | 403073102 | ,000             | ,000  |
|                           | 403073103 | ,000             | ,000  |
|                           | 403073202 | ,000             | ,000  |
|                           | 403073203 | ,000             | ,000  |
|                           | 403073204 | ,000             | ,000  |
|                           | 403073303 | ,000             | ,000  |
|                           | 403073651 | ,000             | ,000  |
|                           | 403073771 | ,000             | ,000  |
|                           | 403133102 | ,000             | ,000  |
|                           | 403133106 | 1,000            | ,000  |
|                           | 403133107 | ,000             | 1,000 |
|                           | 403133109 | ,000             | ,000  |
|                           | 403133202 | ,000             | ,000  |
|                           | 403133203 | ,000             | ,000  |
|                           | 403133204 | ,000             | ,000  |
|                           | 403133315 | ,000             | ,000  |
|                           | 403133322 | ,000             | ,000  |
|                           | 403133401 | ,000             | ,000  |
|                           | 403133402 | ,000             | ,000  |
|                           | 403133550 | ,000             | ,000  |
|                           | 403133772 | ,000             | ,000  |
|                           | 403135803 | ,000             | ,000  |

## Categorical Variables Codings

|                           |           | Parameter coding |       |
|---------------------------|-----------|------------------|-------|
|                           |           | (12)             | (13)  |
| VASTY2 (SAIR*10000)+VASTY | 403073101 | ,000             | ,000  |
|                           | 403073102 | ,000             | ,000  |
|                           | 403073103 | ,000             | ,000  |
|                           | 403073202 | ,000             | ,000  |
|                           | 403073203 | ,000             | ,000  |
|                           | 403073204 | ,000             | ,000  |
|                           | 403073303 | ,000             | ,000  |
|                           | 403073651 | ,000             | ,000  |
|                           | 403073771 | ,000             | ,000  |
|                           | 403133102 | ,000             | ,000  |
|                           | 403133106 | ,000             | ,000  |
|                           | 403133107 | ,000             | ,000  |
|                           | 403133109 | 1,000            | ,000  |
|                           | 403133202 | ,000             | 1,000 |
|                           | 403133203 | ,000             | ,000  |
|                           | 403133204 | ,000             | ,000  |
|                           | 403133315 | ,000             | ,000  |
|                           | 403133322 | ,000             | ,000  |
|                           | 403133401 | ,000             | ,000  |
|                           | 403133402 | ,000             | ,000  |
|                           | 403133550 | ,000             | ,000  |
|                           | 403133772 | ,000             | ,000  |
|                           | 403135803 | ,000             | ,000  |

## Categorical Variables Codings

|                           |           | Parameter coding |       |
|---------------------------|-----------|------------------|-------|
|                           |           | (14)             | (15)  |
| VASTY2 (SAIR*10000)+VASTY | 403073101 | ,000             | ,000  |
|                           | 403073102 | ,000             | ,000  |
|                           | 403073103 | ,000             | ,000  |
|                           | 403073202 | ,000             | ,000  |
|                           | 403073203 | ,000             | ,000  |
|                           | 403073204 | ,000             | ,000  |
|                           | 403073303 | ,000             | ,000  |
|                           | 403073651 | ,000             | ,000  |
|                           | 403073771 | ,000             | ,000  |
|                           | 403133102 | ,000             | ,000  |
|                           | 403133106 | ,000             | ,000  |
|                           | 403133107 | ,000             | ,000  |
|                           | 403133109 | ,000             | ,000  |
|                           | 403133202 | ,000             | ,000  |
|                           | 403133203 | 1,000            | ,000  |
|                           | 403133204 | ,000             | 1,000 |
|                           | 403133315 | ,000             | ,000  |
|                           | 403133322 | ,000             | ,000  |
|                           | 403133401 | ,000             | ,000  |
|                           | 403133402 | ,000             | ,000  |
|                           | 403133550 | ,000             | ,000  |
|                           | 403133772 | ,000             | ,000  |
|                           | 403135803 | ,000             | ,000  |

## Categorical Variables Codings

|                           |           | Parameter coding |       |
|---------------------------|-----------|------------------|-------|
|                           |           | (16)             | (17)  |
| VASTY2 (SAIR*10000)+VASTY | 403073101 | ,000             | ,000  |
|                           | 403073102 | ,000             | ,000  |
|                           | 403073103 | ,000             | ,000  |
|                           | 403073202 | ,000             | ,000  |
|                           | 403073203 | ,000             | ,000  |
|                           | 403073204 | ,000             | ,000  |
|                           | 403073303 | ,000             | ,000  |
|                           | 403073651 | ,000             | ,000  |
|                           | 403073771 | ,000             | ,000  |
|                           | 403133102 | ,000             | ,000  |
|                           | 403133106 | ,000             | ,000  |
|                           | 403133107 | ,000             | ,000  |
|                           | 403133109 | ,000             | ,000  |
|                           | 403133202 | ,000             | ,000  |
|                           | 403133203 | ,000             | ,000  |
|                           | 403133204 | ,000             | ,000  |
|                           | 403133315 | 1,000            | ,000  |
|                           | 403133322 | ,000             | 1,000 |
|                           | 403133401 | ,000             | ,000  |
|                           | 403133402 | ,000             | ,000  |
|                           | 403133550 | ,000             | ,000  |
|                           | 403133772 | ,000             | ,000  |
|                           | 403135803 | ,000             | ,000  |

## Categorical Variables Codings

|                           |           | Parameter coding |       |
|---------------------------|-----------|------------------|-------|
|                           |           | (18)             | (19)  |
| VASTY2 (SAIR*10000)+VASTY | 403073101 | ,000             | ,000  |
|                           | 403073102 | ,000             | ,000  |
|                           | 403073103 | ,000             | ,000  |
|                           | 403073202 | ,000             | ,000  |
|                           | 403073203 | ,000             | ,000  |
|                           | 403073204 | ,000             | ,000  |
|                           | 403073303 | ,000             | ,000  |
|                           | 403073651 | ,000             | ,000  |
|                           | 403073771 | ,000             | ,000  |
|                           | 403133102 | ,000             | ,000  |
|                           | 403133106 | ,000             | ,000  |
|                           | 403133107 | ,000             | ,000  |
|                           | 403133109 | ,000             | ,000  |
|                           | 403133202 | ,000             | ,000  |
|                           | 403133203 | ,000             | ,000  |
|                           | 403133204 | ,000             | ,000  |
|                           | 403133315 | ,000             | ,000  |
|                           | 403133322 | ,000             | ,000  |
|                           | 403133401 | 1,000            | ,000  |
|                           | 403133402 | ,000             | 1,000 |
|                           | 403133550 | ,000             | ,000  |
|                           | 403133772 | ,000             | ,000  |
|                           | 403135803 | ,000             | ,000  |



## Categorical Variables Codings

|                           |           | Parameter coding |       |
|---------------------------|-----------|------------------|-------|
|                           |           | (20)             | (21)  |
| VASTY2 (SAIR*10000)+VASTY | 403073101 | ,000             | ,000  |
|                           | 403073102 | ,000             | ,000  |
|                           | 403073103 | ,000             | ,000  |
|                           | 403073202 | ,000             | ,000  |
|                           | 403073203 | ,000             | ,000  |
|                           | 403073204 | ,000             | ,000  |
|                           | 403073303 | ,000             | ,000  |
|                           | 403073651 | ,000             | ,000  |
|                           | 403073771 | ,000             | ,000  |
|                           | 403133102 | ,000             | ,000  |
|                           | 403133106 | ,000             | ,000  |
|                           | 403133107 | ,000             | ,000  |
|                           | 403133109 | ,000             | ,000  |
|                           | 403133202 | ,000             | ,000  |
|                           | 403133203 | ,000             | ,000  |
|                           | 403133204 | ,000             | ,000  |
|                           | 403133315 | ,000             | ,000  |
|                           | 403133322 | ,000             | ,000  |
|                           | 403133401 | ,000             | ,000  |
|                           | 403133402 | ,000             | ,000  |
|                           | 403133550 | 1,000            | ,000  |
|                           | 403133772 | ,000             | 1,000 |
|                           | 403135803 | ,000             | ,000  |

## Categorical Variables Codings

|                           |           | Parameter coding |      |
|---------------------------|-----------|------------------|------|
|                           |           | (22)             | (23) |
| VASTY2 (SAIR*10000)+VASTY | 403073101 | ,000             | ,000 |
|                           | 403073102 | ,000             | ,000 |
|                           | 403073103 | ,000             | ,000 |
|                           | 403073202 | ,000             | ,000 |
|                           | 403073203 | ,000             | ,000 |
|                           | 403073204 | ,000             | ,000 |
|                           | 403073303 | ,000             | ,000 |
|                           | 403073651 | ,000             | ,000 |
|                           | 403073771 | ,000             | ,000 |
|                           | 403133102 | ,000             | ,000 |
|                           | 403133106 | ,000             | ,000 |
|                           | 403133107 | ,000             | ,000 |
|                           | 403133109 | ,000             | ,000 |
|                           | 403133202 | ,000             | ,000 |
|                           | 403133203 | ,000             | ,000 |
|                           | 403133204 | ,000             | ,000 |
|                           | 403133315 | ,000             | ,000 |
|                           | 403133322 | ,000             | ,000 |
|                           | 403133401 | ,000             | ,000 |
|                           | 403133402 | ,000             | ,000 |
|                           | 403133550 | ,000             | ,000 |
|                           | 403133772 | ,000             | ,000 |
|                           | 403135803 | 1,000            | ,000 |

## Categorical Variables Codings

|                           |           | Parameter coding |      |
|---------------------------|-----------|------------------|------|
|                           |           | (24)             | (25) |
| VASTY2 (SAIR*10000)+VASTY | 403073101 | ,000             | ,000 |
|                           | 403073102 | ,000             | ,000 |
|                           | 403073103 | ,000             | ,000 |
|                           | 403073202 | ,000             | ,000 |
|                           | 403073203 | ,000             | ,000 |
|                           | 403073204 | ,000             | ,000 |
|                           | 403073303 | ,000             | ,000 |
|                           | 403073651 | ,000             | ,000 |
|                           | 403073771 | ,000             | ,000 |
|                           | 403133102 | ,000             | ,000 |
|                           | 403133106 | ,000             | ,000 |
|                           | 403133107 | ,000             | ,000 |
|                           | 403133109 | ,000             | ,000 |
|                           | 403133202 | ,000             | ,000 |
|                           | 403133203 | ,000             | ,000 |
|                           | 403133204 | ,000             | ,000 |
|                           | 403133315 | ,000             | ,000 |
|                           | 403133322 | ,000             | ,000 |
|                           | 403133401 | ,000             | ,000 |
|                           | 403133402 | ,000             | ,000 |
|                           | 403133550 | ,000             | ,000 |
|                           | 403133772 | ,000             | ,000 |
|                           | 403135803 | ,000             | ,000 |

## Categorical Variables Codings

|                           |           | Parameter coding |      |
|---------------------------|-----------|------------------|------|
|                           |           | (26)             | (27) |
| VASTY2 (SAIR*10000)+VASTY | 403073101 | ,000             | ,000 |
|                           | 403073102 | ,000             | ,000 |
|                           | 403073103 | ,000             | ,000 |
|                           | 403073202 | ,000             | ,000 |
|                           | 403073203 | ,000             | ,000 |
|                           | 403073204 | ,000             | ,000 |
|                           | 403073303 | ,000             | ,000 |
|                           | 403073651 | ,000             | ,000 |
|                           | 403073771 | ,000             | ,000 |
|                           | 403133102 | ,000             | ,000 |
|                           | 403133106 | ,000             | ,000 |
|                           | 403133107 | ,000             | ,000 |
|                           | 403133109 | ,000             | ,000 |
|                           | 403133202 | ,000             | ,000 |
|                           | 403133203 | ,000             | ,000 |
|                           | 403133204 | ,000             | ,000 |
|                           | 403133315 | ,000             | ,000 |
|                           | 403133322 | ,000             | ,000 |
|                           | 403133401 | ,000             | ,000 |
|                           | 403133402 | ,000             | ,000 |
|                           | 403133550 | ,000             | ,000 |
|                           | 403133772 | ,000             | ,000 |
|                           | 403135803 | ,000             | ,000 |

**Categorical Variables Codings**

|                           |           | Parameter coding |      |
|---------------------------|-----------|------------------|------|
|                           |           | (28)             | (29) |
| VASTY2 (SAIR*10000)+VASTY | 403073101 | ,000             | ,000 |
|                           | 403073102 | ,000             | ,000 |
|                           | 403073103 | ,000             | ,000 |
|                           | 403073202 | ,000             | ,000 |
|                           | 403073203 | ,000             | ,000 |
|                           | 403073204 | ,000             | ,000 |
|                           | 403073303 | ,000             | ,000 |
|                           | 403073651 | ,000             | ,000 |
|                           | 403073771 | ,000             | ,000 |
|                           | 403133102 | ,000             | ,000 |
|                           | 403133106 | ,000             | ,000 |
|                           | 403133107 | ,000             | ,000 |
|                           | 403133109 | ,000             | ,000 |
|                           | 403133202 | ,000             | ,000 |
|                           | 403133203 | ,000             | ,000 |
|                           | 403133204 | ,000             | ,000 |
|                           | 403133315 | ,000             | ,000 |
|                           | 403133322 | ,000             | ,000 |
|                           | 403133401 | ,000             | ,000 |
|                           | 403133402 | ,000             | ,000 |
|                           | 403133550 | ,000             | ,000 |
|                           | 403133772 | ,000             | ,000 |
|                           | 403135803 | ,000             | ,000 |

Peer Review Only

## Categorical Variables Codings

|                           |           | Parameter coding |      |
|---------------------------|-----------|------------------|------|
|                           |           | (30)             | (31) |
| VASTY2 (SAIR*10000)+VASTY | 403073101 | ,000             | ,000 |
|                           | 403073102 | ,000             | ,000 |
|                           | 403073103 | ,000             | ,000 |
|                           | 403073202 | ,000             | ,000 |
|                           | 403073203 | ,000             | ,000 |
|                           | 403073204 | ,000             | ,000 |
|                           | 403073303 | ,000             | ,000 |
|                           | 403073651 | ,000             | ,000 |
|                           | 403073771 | ,000             | ,000 |
|                           | 403133102 | ,000             | ,000 |
|                           | 403133106 | ,000             | ,000 |
|                           | 403133107 | ,000             | ,000 |
|                           | 403133109 | ,000             | ,000 |
|                           | 403133202 | ,000             | ,000 |
|                           | 403133203 | ,000             | ,000 |
|                           | 403133204 | ,000             | ,000 |
|                           | 403133315 | ,000             | ,000 |
|                           | 403133322 | ,000             | ,000 |
|                           | 403133401 | ,000             | ,000 |
|                           | 403133402 | ,000             | ,000 |
|                           | 403133550 | ,000             | ,000 |
|                           | 403133772 | ,000             | ,000 |
|                           | 403135803 | ,000             | ,000 |

## Categorical Variables Codings

|                           |           | Parameter coding |      |
|---------------------------|-----------|------------------|------|
|                           |           | (32)             | (33) |
| VASTY2 (SAIR*10000)+VASTY | 403073101 | ,000             | ,000 |
|                           | 403073102 | ,000             | ,000 |
|                           | 403073103 | ,000             | ,000 |
|                           | 403073202 | ,000             | ,000 |
|                           | 403073203 | ,000             | ,000 |
|                           | 403073204 | ,000             | ,000 |
|                           | 403073303 | ,000             | ,000 |
|                           | 403073651 | ,000             | ,000 |
|                           | 403073771 | ,000             | ,000 |
|                           | 403133102 | ,000             | ,000 |
|                           | 403133106 | ,000             | ,000 |
|                           | 403133107 | ,000             | ,000 |
|                           | 403133109 | ,000             | ,000 |
|                           | 403133202 | ,000             | ,000 |
|                           | 403133203 | ,000             | ,000 |
|                           | 403133204 | ,000             | ,000 |
|                           | 403133315 | ,000             | ,000 |
|                           | 403133322 | ,000             | ,000 |
|                           | 403133401 | ,000             | ,000 |
|                           | 403133402 | ,000             | ,000 |
|                           | 403133550 | ,000             | ,000 |
|                           | 403133772 | ,000             | ,000 |
|                           | 403135803 | ,000             | ,000 |

## Categorical Variables Codings

|                           |           | Parameter coding |      |
|---------------------------|-----------|------------------|------|
|                           |           | (34)             | (35) |
| VASTY2 (SAIR*10000)+VASTY | 403073101 | ,000             | ,000 |
|                           | 403073102 | ,000             | ,000 |
|                           | 403073103 | ,000             | ,000 |
|                           | 403073202 | ,000             | ,000 |
|                           | 403073203 | ,000             | ,000 |
|                           | 403073204 | ,000             | ,000 |
|                           | 403073303 | ,000             | ,000 |
|                           | 403073651 | ,000             | ,000 |
|                           | 403073771 | ,000             | ,000 |
|                           | 403133102 | ,000             | ,000 |
|                           | 403133106 | ,000             | ,000 |
|                           | 403133107 | ,000             | ,000 |
|                           | 403133109 | ,000             | ,000 |
|                           | 403133202 | ,000             | ,000 |
|                           | 403133203 | ,000             | ,000 |
|                           | 403133204 | ,000             | ,000 |
|                           | 403133315 | ,000             | ,000 |
|                           | 403133322 | ,000             | ,000 |
|                           | 403133401 | ,000             | ,000 |
|                           | 403133402 | ,000             | ,000 |
|                           | 403133550 | ,000             | ,000 |
|                           | 403133772 | ,000             | ,000 |
|                           | 403135803 | ,000             | ,000 |



## Categorical Variables Codings

|                              |                                         | Frequency | Parameter<br>(1) |
|------------------------------|-----------------------------------------|-----------|------------------|
|                              | 404060001                               | 365       | ,000             |
|                              | 404060002                               | 366       | ,000             |
|                              | 404310003                               | 291       | ,000             |
|                              | 404310004                               | 291       | ,000             |
|                              | 502300005                               | 366       | ,000             |
|                              | 502300006                               | 225       | ,000             |
|                              | 502300007                               | 366       | ,000             |
|                              | 502300214                               | 366       | ,000             |
|                              | 502300411                               | 366       | ,000             |
|                              | 502300415                               | 360       | ,000             |
|                              | 502300416                               | 363       | ,000             |
|                              | 502300811                               | 364       | ,000             |
|                              | 502300913                               | 315       | ,000             |
| weekday veckodag             | 1 måndag                                | 1805      | ,000             |
|                              | 2 tisdag                                | 1812      | 1,000            |
|                              | 3 onsdag                                | 1800      | ,000             |
|                              | 4 torsdag                               | 1794      | ,000             |
|                              | 5 fredag                                | 1788      | ,000             |
|                              | 6 lördag                                | 1735      | ,000             |
|                              | 7 söndag                                | 1741      | ,000             |
| season säsong/period         | 1 januari-mars                          | 3182      | ,000             |
|                              | 2 april-maj                             | 2127      | 1,000            |
|                              | 3 juni-augusti                          | 2911      | ,000             |
|                              | 4 september-oktober                     | 2144      | ,000             |
|                              | 5 november-december                     | 2111      | ,000             |
| sv3 tredjedelar för standard | 1 andra tredjedelen                     | 3172      | ,000             |
|                              | 2 första tredjedelen                    | 4718      | 1,000            |
|                              | 3 tredje tredjedelen                    | 4585      | ,000             |
| holiday större helg          | 1 ingen större helg                     | 12078     | ,000             |
|                              | 2 större helg (påsk/midsommar/julonyår) | 397       | 1,000            |

## Categorical Variables Codings

|                              |                                         | Parameter coding |       |
|------------------------------|-----------------------------------------|------------------|-------|
|                              |                                         | (2)              | (3)   |
|                              | 404060001                               | ,000             | ,000  |
|                              | 404060002                               | ,000             | ,000  |
|                              | 404310003                               | ,000             | ,000  |
|                              | 404310004                               | ,000             | ,000  |
|                              | 502300005                               | ,000             | ,000  |
|                              | 502300006                               | ,000             | ,000  |
|                              | 502300007                               | ,000             | ,000  |
|                              | 502300214                               | ,000             | ,000  |
|                              | 502300411                               | ,000             | ,000  |
|                              | 502300415                               | ,000             | ,000  |
|                              | 502300416                               | ,000             | ,000  |
|                              | 502300811                               | ,000             | ,000  |
|                              | 502300913                               | ,000             | ,000  |
| weekday veckodag             | 1 måndag                                | ,000             | ,000  |
|                              | 2 tisdag                                | ,000             | ,000  |
|                              | 3 onsdag                                | 1,000            | ,000  |
|                              | 4 torsdag                               | ,000             | 1,000 |
|                              | 5 fredag                                | ,000             | ,000  |
|                              | 6 lördag                                | ,000             | ,000  |
|                              | 7 söndag                                | ,000             | ,000  |
| season säsong/period         | 1 januari-mars                          | ,000             | ,000  |
|                              | 2 april-maj                             | ,000             | ,000  |
|                              | 3 juni-augusti                          | 1,000            | ,000  |
|                              | 4 september-oktober                     | ,000             | 1,000 |
|                              | 5 november-december                     | ,000             | ,000  |
| sv3 tredjedelar för standard | 1 andra tredjedelen                     | ,000             |       |
|                              | 2 första tredjedelen                    | ,000             |       |
|                              | 3 tredje tredjedelen                    | 1,000            |       |
| holiday större helg          | 1 ingen större helg                     |                  |       |
|                              | 2 större helg (påsk/midsommar/julonyår) |                  |       |

## Categorical Variables Codings

|                              |                                         | Parameter coding |       |
|------------------------------|-----------------------------------------|------------------|-------|
|                              |                                         | (4)              | (5)   |
|                              | 404060001                               | ,000             | ,000  |
|                              | 404060002                               | ,000             | ,000  |
|                              | 404310003                               | ,000             | ,000  |
|                              | 404310004                               | ,000             | ,000  |
|                              | 502300005                               | ,000             | ,000  |
|                              | 502300006                               | ,000             | ,000  |
|                              | 502300007                               | ,000             | ,000  |
|                              | 502300214                               | ,000             | ,000  |
|                              | 502300411                               | ,000             | ,000  |
|                              | 502300415                               | ,000             | ,000  |
|                              | 502300416                               | ,000             | ,000  |
|                              | 502300811                               | ,000             | ,000  |
|                              | 502300913                               | ,000             | ,000  |
| weekday veckodag             | 1 måndag                                | ,000             | ,000  |
|                              | 2 tisdag                                | ,000             | ,000  |
|                              | 3 onsdag                                | ,000             | ,000  |
|                              | 4 torsdag                               | ,000             | ,000  |
|                              | 5 fredag                                | 1,000            | ,000  |
|                              | 6 lördag                                | ,000             | 1,000 |
|                              | 7 söndag                                | ,000             | ,000  |
| season säsong/period         | 1 januari-mars                          | ,000             |       |
|                              | 2 april-maj                             | ,000             |       |
|                              | 3 juni-augusti                          | ,000             |       |
|                              | 4 september-oktober                     | ,000             |       |
|                              | 5 november-december                     | 1,000            |       |
| sv3 tredjedelar för standard | 1 andra tredjedelen                     |                  |       |
|                              | 2 första tredjedelen                    |                  |       |
|                              | 3 tredje tredjedelen                    |                  |       |
| holiday större helg          | 1 ingen större helg                     |                  |       |
|                              | 2 större helg (påsk/midsommar/julonyår) |                  |       |

## Categorical Variables Codings

|                              |                                         | Parameter coding |      |
|------------------------------|-----------------------------------------|------------------|------|
|                              |                                         | (6)              | (7)  |
|                              | 404060001                               | ,000             | ,000 |
|                              | 404060002                               | ,000             | ,000 |
|                              | 404310003                               | ,000             | ,000 |
|                              | 404310004                               | ,000             | ,000 |
|                              | 502300005                               | ,000             | ,000 |
|                              | 502300006                               | ,000             | ,000 |
|                              | 502300007                               | ,000             | ,000 |
|                              | 502300214                               | ,000             | ,000 |
|                              | 502300411                               | ,000             | ,000 |
|                              | 502300415                               | ,000             | ,000 |
|                              | 502300416                               | ,000             | ,000 |
|                              | 502300811                               | ,000             | ,000 |
|                              | 502300913                               | ,000             | ,000 |
| weekday veckodag             | 1 måndag                                | ,000             |      |
|                              | 2 tisdag                                | ,000             |      |
|                              | 3 onsdag                                | ,000             |      |
|                              | 4 torsdag                               | ,000             |      |
|                              | 5 fredag                                | ,000             |      |
|                              | 6 lördag                                | ,000             |      |
|                              | 7 söndag                                | 1,000            |      |
| season säsong/period         | 1 januari-mars                          |                  |      |
|                              | 2 april-maj                             |                  |      |
|                              | 3 juni-augusti                          |                  |      |
|                              | 4 september-oktober                     |                  |      |
|                              | 5 november-december                     |                  |      |
| sv3 tredjedelar för standard | 1 andra tredjedelen                     |                  |      |
|                              | 2 första tredjedelen                    |                  |      |
|                              | 3 tredje tredjedelen                    |                  |      |
| holiday större helg          | 1 ingen större helg                     |                  |      |
|                              | 2 större helg (påsk/midsommar/julonyår) |                  |      |

## Categorical Variables Codings

|                              |                                         | Parameter coding |      |
|------------------------------|-----------------------------------------|------------------|------|
|                              |                                         | (8)              | (9)  |
|                              | 404060001                               | ,000             | ,000 |
|                              | 404060002                               | ,000             | ,000 |
|                              | 404310003                               | ,000             | ,000 |
|                              | 404310004                               | ,000             | ,000 |
|                              | 502300005                               | ,000             | ,000 |
|                              | 502300006                               | ,000             | ,000 |
|                              | 502300007                               | ,000             | ,000 |
|                              | 502300214                               | ,000             | ,000 |
|                              | 502300411                               | ,000             | ,000 |
|                              | 502300415                               | ,000             | ,000 |
|                              | 502300416                               | ,000             | ,000 |
|                              | 502300811                               | ,000             | ,000 |
|                              | 502300913                               | ,000             | ,000 |
| weekday veckodag             | 1 måndag                                |                  |      |
|                              | 2 tisdag                                |                  |      |
|                              | 3 onsdag                                |                  |      |
|                              | 4 torsdag                               |                  |      |
|                              | 5 fredag                                |                  |      |
|                              | 6 lördag                                |                  |      |
|                              | 7 söndag                                |                  |      |
| season säsong/period         | 1 januari-mars                          |                  |      |
|                              | 2 april-maj                             |                  |      |
|                              | 3 juni-augusti                          |                  |      |
|                              | 4 september-oktober                     |                  |      |
|                              | 5 november-december                     |                  |      |
| sv3 tredjedelar för standard | 1 andra tredjedelen                     |                  |      |
|                              | 2 första tredjedelen                    |                  |      |
|                              | 3 tredje tredjedelen                    |                  |      |
| holiday större helg          | 1 ingen större helg                     |                  |      |
|                              | 2 större helg (påsk/midsommar/julonyår) |                  |      |

## Categorical Variables Codings

|                              |                                         | Parameter coding |      |
|------------------------------|-----------------------------------------|------------------|------|
|                              |                                         | (10)             | (11) |
|                              | 404060001                               | ,000             | ,000 |
|                              | 404060002                               | ,000             | ,000 |
|                              | 404310003                               | ,000             | ,000 |
|                              | 404310004                               | ,000             | ,000 |
|                              | 502300005                               | ,000             | ,000 |
|                              | 502300006                               | ,000             | ,000 |
|                              | 502300007                               | ,000             | ,000 |
|                              | 502300214                               | ,000             | ,000 |
|                              | 502300411                               | ,000             | ,000 |
|                              | 502300415                               | ,000             | ,000 |
|                              | 502300416                               | ,000             | ,000 |
|                              | 502300811                               | ,000             | ,000 |
|                              | 502300913                               | ,000             | ,000 |
| weekday veckodag             | 1 måndag                                |                  |      |
|                              | 2 tisdag                                |                  |      |
|                              | 3 onsdag                                |                  |      |
|                              | 4 torsdag                               |                  |      |
|                              | 5 fredag                                |                  |      |
|                              | 6 lördag                                |                  |      |
|                              | 7 söndag                                |                  |      |
| season säsong/period         | 1 januari-mars                          |                  |      |
|                              | 2 april-maj                             |                  |      |
|                              | 3 juni-augusti                          |                  |      |
|                              | 4 september-oktober                     |                  |      |
|                              | 5 november-december                     |                  |      |
| sv3 tredjedelar för standard | 1 andra tredjedelen                     |                  |      |
|                              | 2 första tredjedelen                    |                  |      |
|                              | 3 tredje tredjedelen                    |                  |      |
| holiday större helg          | 1 ingen större helg                     |                  |      |
|                              | 2 större helg (påsk/midsommar/julonyår) |                  |      |

## Categorical Variables Codings

|                              |                                         | Parameter coding |      |
|------------------------------|-----------------------------------------|------------------|------|
|                              |                                         | (12)             | (13) |
|                              | 404060001                               | ,000             | ,000 |
|                              | 404060002                               | ,000             | ,000 |
|                              | 404310003                               | ,000             | ,000 |
|                              | 404310004                               | ,000             | ,000 |
|                              | 502300005                               | ,000             | ,000 |
|                              | 502300006                               | ,000             | ,000 |
|                              | 502300007                               | ,000             | ,000 |
|                              | 502300214                               | ,000             | ,000 |
|                              | 502300411                               | ,000             | ,000 |
|                              | 502300415                               | ,000             | ,000 |
|                              | 502300416                               | ,000             | ,000 |
|                              | 502300811                               | ,000             | ,000 |
|                              | 502300913                               | ,000             | ,000 |
| weekday veckodag             | 1 måndag                                |                  |      |
|                              | 2 tisdag                                |                  |      |
|                              | 3 onsdag                                |                  |      |
|                              | 4 torsdag                               |                  |      |
|                              | 5 fredag                                |                  |      |
|                              | 6 lördag                                |                  |      |
|                              | 7 söndag                                |                  |      |
| season säsong/period         | 1 januari-mars                          |                  |      |
|                              | 2 april-maj                             |                  |      |
|                              | 3 juni-augusti                          |                  |      |
|                              | 4 september-oktober                     |                  |      |
|                              | 5 november-december                     |                  |      |
| sv3 tredjedelar för standard | 1 andra tredjedelen                     |                  |      |
|                              | 2 första tredjedelen                    |                  |      |
|                              | 3 tredje tredjedelen                    |                  |      |
| holiday större helg          | 1 ingen större helg                     |                  |      |
|                              | 2 större helg (påsk/midsommar/julonyår) |                  |      |

## Categorical Variables Codings

|                              |                                         | Parameter coding |      |
|------------------------------|-----------------------------------------|------------------|------|
|                              |                                         | (14)             | (15) |
|                              | 404060001                               | ,000             | ,000 |
|                              | 404060002                               | ,000             | ,000 |
|                              | 404310003                               | ,000             | ,000 |
|                              | 404310004                               | ,000             | ,000 |
|                              | 502300005                               | ,000             | ,000 |
|                              | 502300006                               | ,000             | ,000 |
|                              | 502300007                               | ,000             | ,000 |
|                              | 502300214                               | ,000             | ,000 |
|                              | 502300411                               | ,000             | ,000 |
|                              | 502300415                               | ,000             | ,000 |
|                              | 502300416                               | ,000             | ,000 |
|                              | 502300811                               | ,000             | ,000 |
|                              | 502300913                               | ,000             | ,000 |
| weekday veckodag             | 1 måndag                                |                  |      |
|                              | 2 tisdag                                |                  |      |
|                              | 3 onsdag                                |                  |      |
|                              | 4 torsdag                               |                  |      |
|                              | 5 fredag                                |                  |      |
|                              | 6 lördag                                |                  |      |
|                              | 7 söndag                                |                  |      |
| season säsong/period         | 1 januari-mars                          |                  |      |
|                              | 2 april-maj                             |                  |      |
|                              | 3 juni-augusti                          |                  |      |
|                              | 4 september-oktober                     |                  |      |
|                              | 5 november-december                     |                  |      |
| sv3 tredjedelar för standard | 1 andra tredjedelen                     |                  |      |
|                              | 2 första tredjedelen                    |                  |      |
|                              | 3 tredje tredjedelen                    |                  |      |
| holiday större helg          | 1 ingen större helg                     |                  |      |
|                              | 2 större helg (påsk/midsommar/julonyår) |                  |      |



## Categorical Variables Codings

|                              |                                         | Parameter coding |      |
|------------------------------|-----------------------------------------|------------------|------|
|                              |                                         | (16)             | (17) |
|                              | 404060001                               | ,000             | ,000 |
|                              | 404060002                               | ,000             | ,000 |
|                              | 404310003                               | ,000             | ,000 |
|                              | 404310004                               | ,000             | ,000 |
|                              | 502300005                               | ,000             | ,000 |
|                              | 502300006                               | ,000             | ,000 |
|                              | 502300007                               | ,000             | ,000 |
|                              | 502300214                               | ,000             | ,000 |
|                              | 502300411                               | ,000             | ,000 |
|                              | 502300415                               | ,000             | ,000 |
|                              | 502300416                               | ,000             | ,000 |
|                              | 502300811                               | ,000             | ,000 |
|                              | 502300913                               | ,000             | ,000 |
| weekday veckodag             | 1 måndag                                |                  |      |
|                              | 2 tisdag                                |                  |      |
|                              | 3 onsdag                                |                  |      |
|                              | 4 torsdag                               |                  |      |
|                              | 5 fredag                                |                  |      |
|                              | 6 lördag                                |                  |      |
|                              | 7 söndag                                |                  |      |
| season säsong/period         | 1 januari-mars                          |                  |      |
|                              | 2 april-maj                             |                  |      |
|                              | 3 juni-augusti                          |                  |      |
|                              | 4 september-oktober                     |                  |      |
|                              | 5 november-december                     |                  |      |
| sv3 tredjedelar för standard | 1 andra tredjedelen                     |                  |      |
|                              | 2 första tredjedelen                    |                  |      |
|                              | 3 tredje tredjedelen                    |                  |      |
| holiday större helg          | 1 ingen större helg                     |                  |      |
|                              | 2 större helg (påsk/midsommar/julonyår) |                  |      |

## Categorical Variables Codings

|                              |                                         | Parameter coding |      |
|------------------------------|-----------------------------------------|------------------|------|
|                              |                                         | (18)             | (19) |
|                              | 404060001                               | ,000             | ,000 |
|                              | 404060002                               | ,000             | ,000 |
|                              | 404310003                               | ,000             | ,000 |
|                              | 404310004                               | ,000             | ,000 |
|                              | 502300005                               | ,000             | ,000 |
|                              | 502300006                               | ,000             | ,000 |
|                              | 502300007                               | ,000             | ,000 |
|                              | 502300214                               | ,000             | ,000 |
|                              | 502300411                               | ,000             | ,000 |
|                              | 502300415                               | ,000             | ,000 |
|                              | 502300416                               | ,000             | ,000 |
|                              | 502300811                               | ,000             | ,000 |
|                              | 502300913                               | ,000             | ,000 |
| weekday veckodag             | 1 måndag                                |                  |      |
|                              | 2 tisdag                                |                  |      |
|                              | 3 onsdag                                |                  |      |
|                              | 4 torsdag                               |                  |      |
|                              | 5 fredag                                |                  |      |
|                              | 6 lördag                                |                  |      |
|                              | 7 söndag                                |                  |      |
| season säsong/period         | 1 januari-mars                          |                  |      |
|                              | 2 april-maj                             |                  |      |
|                              | 3 juni-augusti                          |                  |      |
|                              | 4 september-oktober                     |                  |      |
|                              | 5 november-december                     |                  |      |
| sv3 tredjedelar för standard | 1 andra tredjedelen                     |                  |      |
|                              | 2 första tredjedelen                    |                  |      |
|                              | 3 tredje tredjedelen                    |                  |      |
| holiday större helg          | 1 ingen större helg                     |                  |      |
|                              | 2 större helg (påsk/midsommar/julonyår) |                  |      |

## Categorical Variables Codings

|                              |                                         | Parameter coding |      |
|------------------------------|-----------------------------------------|------------------|------|
|                              |                                         | (20)             | (21) |
|                              | 404060001                               | ,000             | ,000 |
|                              | 404060002                               | ,000             | ,000 |
|                              | 404310003                               | ,000             | ,000 |
|                              | 404310004                               | ,000             | ,000 |
|                              | 502300005                               | ,000             | ,000 |
|                              | 502300006                               | ,000             | ,000 |
|                              | 502300007                               | ,000             | ,000 |
|                              | 502300214                               | ,000             | ,000 |
|                              | 502300411                               | ,000             | ,000 |
|                              | 502300415                               | ,000             | ,000 |
|                              | 502300416                               | ,000             | ,000 |
|                              | 502300811                               | ,000             | ,000 |
|                              | 502300913                               | ,000             | ,000 |
| weekday veckodag             | 1 måndag                                |                  |      |
|                              | 2 tisdag                                |                  |      |
|                              | 3 onsdag                                |                  |      |
|                              | 4 torsdag                               |                  |      |
|                              | 5 fredag                                |                  |      |
|                              | 6 lördag                                |                  |      |
|                              | 7 söndag                                |                  |      |
| season säsong/period         | 1 januari-mars                          |                  |      |
|                              | 2 april-maj                             |                  |      |
|                              | 3 juni-augusti                          |                  |      |
|                              | 4 september-oktober                     |                  |      |
|                              | 5 november-december                     |                  |      |
| sv3 tredjedelar för standard | 1 andra tredjedelen                     |                  |      |
|                              | 2 första tredjedelen                    |                  |      |
|                              | 3 tredje tredjedelen                    |                  |      |
| holiday större helg          | 1 ingen större helg                     |                  |      |
|                              | 2 större helg (påsk/midsommar/julonyår) |                  |      |

## Categorical Variables Codings

|                              |                                         | Parameter coding |       |
|------------------------------|-----------------------------------------|------------------|-------|
|                              |                                         | (22)             | (23)  |
|                              | 404060001                               | ,000             | 1,000 |
|                              | 404060002                               | ,000             | ,000  |
|                              | 404310003                               | ,000             | ,000  |
|                              | 404310004                               | ,000             | ,000  |
|                              | 502300005                               | ,000             | ,000  |
|                              | 502300006                               | ,000             | ,000  |
|                              | 502300007                               | ,000             | ,000  |
|                              | 502300214                               | ,000             | ,000  |
|                              | 502300411                               | ,000             | ,000  |
|                              | 502300415                               | ,000             | ,000  |
|                              | 502300416                               | ,000             | ,000  |
|                              | 502300811                               | ,000             | ,000  |
|                              | 502300913                               | ,000             | ,000  |
| weekday veckodag             | 1 måndag                                |                  |       |
|                              | 2 tisdag                                |                  |       |
|                              | 3 onsdag                                |                  |       |
|                              | 4 torsdag                               |                  |       |
|                              | 5 fredag                                |                  |       |
|                              | 6 lördag                                |                  |       |
|                              | 7 söndag                                |                  |       |
| season säsong/period         | 1 januari-mars                          |                  |       |
|                              | 2 april-maj                             |                  |       |
|                              | 3 juni-augusti                          |                  |       |
|                              | 4 september-oktober                     |                  |       |
|                              | 5 november-december                     |                  |       |
| sv3 tredjedelar för standard | 1 andra tredjedelen                     |                  |       |
|                              | 2 första tredjedelen                    |                  |       |
|                              | 3 tredje tredjedelen                    |                  |       |
| holiday större helg          | 1 ingen större helg                     |                  |       |
|                              | 2 större helg (påsk/midsommar/julonyår) |                  |       |

## Categorical Variables Codings

|                              |                                         | Parameter coding |       |
|------------------------------|-----------------------------------------|------------------|-------|
|                              |                                         | (24)             | (25)  |
|                              | 404060001                               | ,000             | ,000  |
|                              | 404060002                               | 1,000            | ,000  |
|                              | 404310003                               | ,000             | 1,000 |
|                              | 404310004                               | ,000             | ,000  |
|                              | 502300005                               | ,000             | ,000  |
|                              | 502300006                               | ,000             | ,000  |
|                              | 502300007                               | ,000             | ,000  |
|                              | 502300214                               | ,000             | ,000  |
|                              | 502300411                               | ,000             | ,000  |
|                              | 502300415                               | ,000             | ,000  |
|                              | 502300416                               | ,000             | ,000  |
|                              | 502300811                               | ,000             | ,000  |
|                              | 502300913                               | ,000             | ,000  |
| weekday veckodag             | 1 måndag                                |                  |       |
|                              | 2 tisdag                                |                  |       |
|                              | 3 onsdag                                |                  |       |
|                              | 4 torsdag                               |                  |       |
|                              | 5 fredag                                |                  |       |
|                              | 6 lördag                                |                  |       |
|                              | 7 söndag                                |                  |       |
| season säsong/period         | 1 januari-mars                          |                  |       |
|                              | 2 april-maj                             |                  |       |
|                              | 3 juni-augusti                          |                  |       |
|                              | 4 september-oktober                     |                  |       |
|                              | 5 november-december                     |                  |       |
| sv3 tredjedelar för standard | 1 andra tredjedelen                     |                  |       |
|                              | 2 första tredjedelen                    |                  |       |
|                              | 3 tredje tredjedelen                    |                  |       |
| holiday större helg          | 1 ingen större helg                     |                  |       |
|                              | 2 större helg (påsk/midsommar/julonyår) |                  |       |

## Categorical Variables Codings

|                              |                                         | Parameter coding |       |
|------------------------------|-----------------------------------------|------------------|-------|
|                              |                                         | (26)             | (27)  |
|                              | 404060001                               | ,000             | ,000  |
|                              | 404060002                               | ,000             | ,000  |
|                              | 404310003                               | ,000             | ,000  |
|                              | 404310004                               | 1,000            | ,000  |
|                              | 502300005                               | ,000             | 1,000 |
|                              | 502300006                               | ,000             | ,000  |
|                              | 502300007                               | ,000             | ,000  |
|                              | 502300214                               | ,000             | ,000  |
|                              | 502300411                               | ,000             | ,000  |
|                              | 502300415                               | ,000             | ,000  |
|                              | 502300416                               | ,000             | ,000  |
|                              | 502300811                               | ,000             | ,000  |
|                              | 502300913                               | ,000             | ,000  |
| weekday veckodag             | 1 måndag                                |                  |       |
|                              | 2 tisdag                                |                  |       |
|                              | 3 onsdag                                |                  |       |
|                              | 4 torsdag                               |                  |       |
|                              | 5 fredag                                |                  |       |
|                              | 6 lördag                                |                  |       |
|                              | 7 söndag                                |                  |       |
| season säsong/period         | 1 januari-mars                          |                  |       |
|                              | 2 april-maj                             |                  |       |
|                              | 3 juni-augusti                          |                  |       |
|                              | 4 september-oktober                     |                  |       |
|                              | 5 november-december                     |                  |       |
| sv3 tredjedelar för standard | 1 andra tredjedelen                     |                  |       |
|                              | 2 första tredjedelen                    |                  |       |
|                              | 3 tredje tredjedelen                    |                  |       |
| holiday större helg          | 1 ingen större helg                     |                  |       |
|                              | 2 större helg (påsk/midsommar/julonyår) |                  |       |

## Categorical Variables Codings

|                              |                                         | Parameter coding |       |
|------------------------------|-----------------------------------------|------------------|-------|
|                              |                                         | (28)             | (29)  |
|                              | 404060001                               | ,000             | ,000  |
|                              | 404060002                               | ,000             | ,000  |
|                              | 404310003                               | ,000             | ,000  |
|                              | 404310004                               | ,000             | ,000  |
|                              | 502300005                               | ,000             | ,000  |
|                              | 502300006                               | 1,000            | ,000  |
|                              | 502300007                               | ,000             | 1,000 |
|                              | 502300214                               | ,000             | ,000  |
|                              | 502300411                               | ,000             | ,000  |
|                              | 502300415                               | ,000             | ,000  |
|                              | 502300416                               | ,000             | ,000  |
|                              | 502300811                               | ,000             | ,000  |
|                              | 502300913                               | ,000             | ,000  |
| weekday veckodag             | 1 måndag                                |                  |       |
|                              | 2 tisdag                                |                  |       |
|                              | 3 onsdag                                |                  |       |
|                              | 4 torsdag                               |                  |       |
|                              | 5 fredag                                |                  |       |
|                              | 6 lördag                                |                  |       |
|                              | 7 söndag                                |                  |       |
| season säsong/period         | 1 januari-mars                          |                  |       |
|                              | 2 april-maj                             |                  |       |
|                              | 3 juni-augusti                          |                  |       |
|                              | 4 september-oktober                     |                  |       |
|                              | 5 november-december                     |                  |       |
| sv3 tredjedelar för standard | 1 andra tredjedelen                     |                  |       |
|                              | 2 första tredjedelen                    |                  |       |
|                              | 3 tredje tredjedelen                    |                  |       |
| holiday större helg          | 1 ingen större helg                     |                  |       |
|                              | 2 större helg (påsk/midsommar/julonyår) |                  |       |

## Categorical Variables Codings

|                              |                                         | Parameter coding |       |
|------------------------------|-----------------------------------------|------------------|-------|
|                              |                                         | (30)             | (31)  |
|                              | 404060001                               | ,000             | ,000  |
|                              | 404060002                               | ,000             | ,000  |
|                              | 404310003                               | ,000             | ,000  |
|                              | 404310004                               | ,000             | ,000  |
|                              | 502300005                               | ,000             | ,000  |
|                              | 502300006                               | ,000             | ,000  |
|                              | 502300007                               | ,000             | ,000  |
|                              | 502300214                               | 1,000            | ,000  |
|                              | 502300411                               | ,000             | 1,000 |
|                              | 502300415                               | ,000             | ,000  |
|                              | 502300416                               | ,000             | ,000  |
|                              | 502300811                               | ,000             | ,000  |
|                              | 502300913                               | ,000             | ,000  |
| weekday veckodag             | 1 måndag                                |                  |       |
|                              | 2 tisdag                                |                  |       |
|                              | 3 onsdag                                |                  |       |
|                              | 4 torsdag                               |                  |       |
|                              | 5 fredag                                |                  |       |
|                              | 6 lördag                                |                  |       |
|                              | 7 söndag                                |                  |       |
| season säsong/period         | 1 januari-mars                          |                  |       |
|                              | 2 april-maj                             |                  |       |
|                              | 3 juni-augusti                          |                  |       |
|                              | 4 september-oktober                     |                  |       |
|                              | 5 november-december                     |                  |       |
| sv3 tredjedelar för standard | 1 andra tredjedelen                     |                  |       |
|                              | 2 första tredjedelen                    |                  |       |
|                              | 3 tredje tredjedelen                    |                  |       |
| holiday större helg          | 1 ingen större helg                     |                  |       |
|                              | 2 större helg (påsk/midsommar/julonyår) |                  |       |



## Categorical Variables Codings

|                              |                                         | Parameter coding |       |
|------------------------------|-----------------------------------------|------------------|-------|
|                              |                                         | (32)             | (33)  |
|                              | 404060001                               | ,000             | ,000  |
|                              | 404060002                               | ,000             | ,000  |
|                              | 404310003                               | ,000             | ,000  |
|                              | 404310004                               | ,000             | ,000  |
|                              | 502300005                               | ,000             | ,000  |
|                              | 502300006                               | ,000             | ,000  |
|                              | 502300007                               | ,000             | ,000  |
|                              | 502300214                               | ,000             | ,000  |
|                              | 502300411                               | ,000             | ,000  |
|                              | 502300415                               | 1,000            | ,000  |
|                              | 502300416                               | ,000             | 1,000 |
|                              | 502300811                               | ,000             | ,000  |
|                              | 502300913                               | ,000             | ,000  |
| weekday veckodag             | 1 måndag                                |                  |       |
|                              | 2 tisdag                                |                  |       |
|                              | 3 onsdag                                |                  |       |
|                              | 4 torsdag                               |                  |       |
|                              | 5 fredag                                |                  |       |
|                              | 6 lördag                                |                  |       |
|                              | 7 söndag                                |                  |       |
| season säsong/period         | 1 januari-mars                          |                  |       |
|                              | 2 april-maj                             |                  |       |
|                              | 3 juni-augusti                          |                  |       |
|                              | 4 september-oktober                     |                  |       |
|                              | 5 november-december                     |                  |       |
| sv3 tredjedelar för standard | 1 andra tredjedelen                     |                  |       |
|                              | 2 första tredjedelen                    |                  |       |
|                              | 3 tredje tredjedelen                    |                  |       |
| holiday större helg          | 1 ingen större helg                     |                  |       |
|                              | 2 större helg (påsk/midsommar/julonyår) |                  |       |

## Categorical Variables Codings

|                              |                                         | Parameter coding |       |
|------------------------------|-----------------------------------------|------------------|-------|
|                              |                                         | (34)             | (35)  |
|                              | 404060001                               | ,000             | ,000  |
|                              | 404060002                               | ,000             | ,000  |
|                              | 404310003                               | ,000             | ,000  |
|                              | 404310004                               | ,000             | ,000  |
|                              | 502300005                               | ,000             | ,000  |
|                              | 502300006                               | ,000             | ,000  |
|                              | 502300007                               | ,000             | ,000  |
|                              | 502300214                               | ,000             | ,000  |
|                              | 502300411                               | ,000             | ,000  |
|                              | 502300415                               | ,000             | ,000  |
|                              | 502300416                               | ,000             | ,000  |
|                              | 502300811                               | 1,000            | ,000  |
|                              | 502300913                               | ,000             | 1,000 |
| weekday veckodag             | 1 måndag                                |                  |       |
|                              | 2 tisdag                                |                  |       |
|                              | 3 onsdag                                |                  |       |
|                              | 4 torsdag                               |                  |       |
|                              | 5 fredag                                |                  |       |
|                              | 6 lördag                                |                  |       |
|                              | 7 söndag                                |                  |       |
| season säsong/period         | 1 januari-mars                          |                  |       |
|                              | 2 april-maj                             |                  |       |
|                              | 3 juni-augusti                          |                  |       |
|                              | 4 september-oktober                     |                  |       |
|                              | 5 november-december                     |                  |       |
| sv3 tredjedelar för standard | 1 andra tredjedelen                     |                  |       |
|                              | 2 första tredjedelen                    |                  |       |
|                              | 3 tredje tredjedelen                    |                  |       |
| holiday större helg          | 1 ingen större helg                     |                  |       |
|                              | 2 större helg (påsk/midsommar/julonyår) |                  |       |

**Block 0: Beginning Block**

**Classification Table<sup>a,b</sup>**

| Observed           |                               |                           | Predicted                     |                      |
|--------------------|-------------------------------|---------------------------|-------------------------------|----------------------|
|                    |                               |                           | handt1 händelse larger than 1 |                      |
|                    |                               |                           | 0 ingen eller en händelse     | 1 mer än en händelse |
| Step 0             | handt1 händelse larger than 1 | 0 ingen eller en händelse | 12229                         | 0                    |
|                    |                               | 1 mer än en händelse      | 246                           | 0                    |
| Overall Percentage |                               |                           |                               |                      |

**Classification Table<sup>a,b</sup>**

| Observed           |                               |                           | Predicted          |
|--------------------|-------------------------------|---------------------------|--------------------|
|                    |                               |                           | Percentage Correct |
| Step 0             | handt1 händelse larger than 1 | 0 ingen eller en händelse | 100,0              |
|                    |                               | 1 mer än en händelse      | ,0                 |
| Overall Percentage |                               |                           | 98,0               |

a. Constant is included in the model.

b. The cut value is ,500

**Variables in the Equation**

|                 | B      | S.E. | Wald     | df | Sig. | Exp(B) |
|-----------------|--------|------|----------|----|------|--------|
| Step 0 Constant | -3,906 | ,064 | 3679,612 | 1  | ,000 | ,020   |

## Variables not in the Equation

|        |           |            | Score   | df | Sig. |
|--------|-----------|------------|---------|----|------|
| Step 0 | Variables | sv3        | 2,251   | 2  | ,324 |
|        |           | sv3(1)     | 2,148   | 1  | ,143 |
|        |           | sv3(2)     | ,375    | 1  | ,540 |
|        |           | VASTY2     | 211,294 | 35 | ,000 |
|        |           | VASTY2(1)  | ,109    | 1  | ,741 |
|        |           | VASTY2(2)  | 2,111   | 1  | ,146 |
|        |           | VASTY2(3)  | 5,608   | 1  | ,018 |
|        |           | VASTY2(4)  | ,094    | 1  | ,759 |
|        |           | VASTY2(5)  | 1,981   | 1  | ,159 |
|        |           | VASTY2(6)  | 7,542   | 1  | ,006 |
|        |           | VASTY2(7)  | 3,478   | 1  | ,062 |
|        |           | VASTY2(8)  | ,006    | 1  | ,940 |
|        |           | VASTY2(9)  | ,082    | 1  | ,775 |
|        |           | VASTY2(10) | 36,459  | 1  | ,000 |
|        |           | VASTY2(11) | 27,814  | 1  | ,000 |
|        |           | VASTY2(12) | 2,573   | 1  | ,109 |
|        |           | VASTY2(13) | ,705    | 1  | ,401 |
|        |           | VASTY2(14) | ,209    | 1  | ,647 |
|        |           | VASTY2(15) | ,209    | 1  | ,647 |
|        |           | VASTY2(16) | ,071    | 1  | ,789 |
|        |           | VASTY2(17) | 7,564   | 1  | ,006 |
|        |           | VASTY2(18) | 7,500   | 1  | ,006 |
|        |           | VASTY2(19) | 5,608   | 1  | ,018 |
|        |           | VASTY2(20) | 1,471   | 1  | ,225 |
|        |           | VASTY2(21) | 2,573   | 1  | ,109 |
|        |           | VASTY2(22) | ,474    | 1  | ,491 |
|        |           | VASTY2(23) | 41,219  | 1  | ,000 |
|        |           | VASTY2(24) | 20,216  | 1  | ,000 |
|        |           | VASTY2(25) | ,290    | 1  | ,590 |
|        |           | VASTY2(26) | ,550    | 1  | ,458 |
|        |           | VASTY2(27) | 5,629   | 1  | ,018 |
|        |           | VASTY2(28) | 2,766   | 1  | ,096 |
|        |           | VASTY2(29) | 7,585   | 1  | ,006 |
|        |           | VASTY2(30) | ,089    | 1  | ,765 |
|        |           | VASTY2(31) | 8,820   | 1  | ,003 |
|        |           | VASTY2(32) | ,652    | 1  | ,419 |
|        |           | VASTY2(33) | 1,464   | 1  | ,226 |
|        |           | VASTY2(34) | 5,587   | 1  | ,018 |
|        |           | VASTY2(35) | 7,764   | 1  | ,005 |
|        |           | weekday    | 3,270   | 6  | ,774 |
|        |           | weekday(1) | ,002    | 1  | ,961 |
|        |           | weekday(2) | ,075    | 1  | ,784 |
|        |           | weekday(3) | ,720    | 1  | ,396 |

**Variables not in the Equation**

|                    | Score   | df | Sig. |
|--------------------|---------|----|------|
| weekday(4)         | ,019    | 1  | ,892 |
| weekday(5)         | 2,336   | 1  | ,126 |
| weekday(6)         | ,004    | 1  | ,951 |
| holiday(1)         | 3,138   | 1  | ,076 |
| season             | 6,828   | 4  | ,145 |
| season(1)          | ,483    | 1  | ,487 |
| season(2)          | 3,014   | 1  | ,083 |
| season(3)          | 4,003   | 1  | ,045 |
| season(4)          | ,934    | 1  | ,334 |
| Overall Statistics | 224,155 | 48 | ,000 |

**Block 1: Method = Enter**

**Omnibus Tests of Model Coefficients**

|             | Chi-square | df | Sig. |
|-------------|------------|----|------|
| Step 1 Step | 222,666    | 48 | ,000 |
| Block       | 222,666    | 48 | ,000 |
| Model       | 222,666    | 48 | ,000 |

**Model Summary**

| Step | -2 Log likelihood     | Cox & Snell R Square | Nagelkerke R Square |
|------|-----------------------|----------------------|---------------------|
| 1    | 2196,117 <sup>a</sup> | ,018                 | ,100                |

a. Estimation terminated at iteration number 20 because maximum iterations has been reached. Final solution cannot be found.

**Classification Table<sup>a</sup>**

|                    |                               | Predicted                 |                      |
|--------------------|-------------------------------|---------------------------|----------------------|
|                    |                               | 0 ingen eller en händelse | 1 mer än en händelse |
| Observed           | handt1 händelse larger than 1 | 12229                     | 0                    |
|                    |                               | 246                       | 0                    |
| Overall Percentage |                               |                           |                      |

**Classification Table<sup>a</sup>**

|                    |                               | Predicted          |
|--------------------|-------------------------------|--------------------|
|                    |                               | Percentage Correct |
| Observed           | handt1 händelse larger than 1 | 100,0              |
|                    |                               | ,0                 |
| Overall Percentage |                               | 98,0               |

a. The cut value is ,500

## Variables in the Equation

|                         | B       | S.E.     | Wald    | df | Sig. | Exp(B) |
|-------------------------|---------|----------|---------|----|------|--------|
| Step 1 <sup>a</sup> sv3 |         |          | ,684    | 2  | ,710 |        |
| sv3(1)                  | ,011    | ,182     | ,003    | 1  | ,954 | 1,011  |
| sv3(2)                  | ,140    | ,181     | ,603    | 1  | ,438 | 1,151  |
| VASTY2                  |         |          | 118,820 | 35 | ,000 |        |
| VASTY2(1)               | ,451    | ,577     | ,611    | 1  | ,435 | 1,570  |
| VASTY2(2)               | ,737    | ,551     | 1,786   | 1  | ,181 | 2,089  |
| VASTY2(3)               | -1,605  | 1,098    | 2,134   | 1  | ,144 | ,201   |
| VASTY2(4)               | ,480    | ,576     | ,695    | 1  | ,404 | 1,616  |
| VASTY2(5)               | -,412   | ,737     | ,312    | 1  | ,577 | ,663   |
| VASTY2(6)               | -17,006 | 2097,861 | ,000    | 1  | ,994 | ,000   |
| VASTY2(7)               | ,915    | ,538     | 2,893   | 1  | ,089 | 2,498  |
| VASTY2(8)               | ,369    | ,592     | ,389    | 1  | ,533 | 1,447  |
| VASTY2(9)               | ,237    | ,611     | ,151    | 1  | ,698 | 1,268  |
| VASTY2(10)              | 1,500   | ,509     | 8,699   | 1  | ,003 | 4,484  |
| VASTY2(11)              | 1,480   | ,504     | 8,629   | 1  | ,003 | 4,392  |
| VASTY2(12)              | -,583   | ,739     | ,622    | 1  | ,430 | ,558   |
| VASTY2(13)              | -,088   | ,646     | ,019    | 1  | ,891 | ,916   |
| VASTY2(14)              | ,137    | ,613     | ,050    | 1  | ,824 | 1,146  |
| VASTY2(15)              | ,112    | ,617     | ,033    | 1  | ,856 | 1,118  |
| VASTY2(16)              | ,073    | ,739     | ,010    | 1  | ,921 | 1,076  |
| VASTY2(17)              | -16,912 | 2094,856 | ,000    | 1  | ,994 | ,000   |
| VASTY2(18)              | -16,890 | 2103,933 | ,000    | 1  | ,994 | ,000   |
| VASTY2(19)              | -1,592  | 1,105    | 2,076   | 1  | ,150 | ,204   |
| VASTY2(20)              | -,423   | ,737     | ,329    | 1  | ,566 | ,655   |
| VASTY2(21)              | -,501   | ,735     | ,466    | 1  | ,495 | ,606   |
| VASTY2(22)              | ,597    | ,563     | 1,122   | 1  | ,289 | 1,816  |
| VASTY2(23)              | 1,605   | ,498     | 10,374  | 1  | ,001 | 4,978  |
| VASTY2(24)              | 1,318   | ,510     | 6,681   | 1  | ,010 | 3,736  |
| VASTY2(25)              | ,531    | ,593     | ,802    | 1  | ,370 | 1,701  |
| VASTY2(26)              | -,078   | ,676     | ,013    | 1  | ,909 | ,925   |
| VASTY2(27)              | -1,707  | 1,100    | 2,406   | 1  | ,121 | ,181   |
| VASTY2(28)              | -1,304  | 1,105    | 1,393   | 1  | ,238 | ,271   |
| VASTY2(29)              | -17,049 | 2095,904 | ,000    | 1  | ,994 | ,000   |
| VASTY2(30)              | ,466    | ,577     | ,652    | 1  | ,419 | 1,594  |
| VASTY2(31)              | 1,126   | ,533     | 4,461   | 1  | ,035 | 3,084  |
| VASTY2(32)              | ,012    | ,649     | ,000    | 1  | ,985 | 1,013  |
| VASTY2(33)              | -,218   | ,686     | ,100    | 1  | ,751 | ,804   |
| VASTY2(34)              | -1,649  | 1,098    | 2,254   | 1  | ,133 | ,192   |
| VASTY2(35)              | 1,051   | ,534     | 3,880   | 1  | ,049 | 2,861  |
| weekday                 |         |          | 3,005   | 6  | ,808 |        |

## Variables in the Equation

|                     |            | 95% C.I. for EXP(B) |        |
|---------------------|------------|---------------------|--------|
|                     |            | Lower               | Upper  |
| Step 1 <sup>a</sup> | sv3        |                     |        |
|                     | sv3(1)     | ,707                | 1,444  |
|                     | sv3(2)     | ,807                | 1,640  |
|                     | VASTY2     |                     |        |
|                     | VASTY2(1)  | ,507                | 4,863  |
|                     | VASTY2(2)  | ,709                | 6,155  |
|                     | VASTY2(3)  | ,023                | 1,730  |
|                     | VASTY2(4)  | ,523                | 4,997  |
|                     | VASTY2(5)  | ,156                | 2,810  |
|                     | VASTY2(6)  | ,000                | .      |
|                     | VASTY2(7)  | ,870                | 7,172  |
|                     | VASTY2(8)  | ,453                | 4,617  |
|                     | VASTY2(9)  | ,383                | 4,196  |
|                     | VASTY2(10) | 1,654               | 12,153 |
|                     | VASTY2(11) | 1,636               | 11,789 |
|                     | VASTY2(12) | ,131                | 2,376  |
|                     | VASTY2(13) | ,258                | 3,247  |
|                     | VASTY2(14) | ,345                | 3,814  |
|                     | VASTY2(15) | ,334                | 3,746  |
|                     | VASTY2(16) | ,253                | 4,578  |
|                     | VASTY2(17) | ,000                | .      |
|                     | VASTY2(18) | ,000                | .      |
|                     | VASTY2(19) | ,023                | 1,775  |
|                     | VASTY2(20) | ,154                | 2,779  |
|                     | VASTY2(21) | ,143                | 2,557  |
|                     | VASTY2(22) | ,602                | 5,475  |
|                     | VASTY2(23) | 1,874               | 13,219 |
|                     | VASTY2(24) | 1,375               | 10,148 |
|                     | VASTY2(25) | ,532                | 5,439  |
|                     | VASTY2(26) | ,246                | 3,483  |
|                     | VASTY2(27) | ,021                | 1,568  |
|                     | VASTY2(28) | ,031                | 2,367  |
|                     | VASTY2(29) | ,000                | .      |
|                     | VASTY2(30) | ,514                | 4,941  |
|                     | VASTY2(31) | 1,085               | 8,770  |
|                     | VASTY2(32) | ,284                | 3,612  |
|                     | VASTY2(33) | ,210                | 3,088  |
|                     | VASTY2(34) | ,022                | 1,655  |
|                     | VASTY2(35) | 1,005               | 8,145  |
|                     | weekday    |                     |        |

Variables in the Equation

|            | B      | S.E. | Wald   | df | Sig. | Exp(B) |
|------------|--------|------|--------|----|------|--------|
| weekday(1) | -,114  | ,235 | ,237   | 1  | ,626 | ,892   |
| weekday(2) | -,175  | ,238 | ,537   | 1  | ,464 | ,840   |
| weekday(3) | ,004   | ,229 | ,000   | 1  | ,985 | 1,004  |
| weekday(4) | -,079  | ,235 | ,113   | 1  | ,737 | ,924   |
| weekday(5) | -,383  | ,258 | 2,212  | 1  | ,137 | ,682   |
| weekday(6) | -,125  | ,239 | ,273   | 1  | ,602 | ,883   |
| holiday(1) | -,822  | ,596 | 1,906  | 1  | ,167 | ,439   |
| season     |        |      | 6,179  | 4  | ,186 |        |
| season(1)  | ,059   | ,197 | ,089   | 1  | ,765 | 1,061  |
| season(2)  | -,265  | ,199 | 1,767  | 1  | ,184 | ,767   |
| season(3)  | ,220   | ,190 | 1,344  | 1  | ,246 | 1,246  |
| season(4)  | -,121  | ,213 | ,322   | 1  | ,570 | ,886   |
| Constant   | -4,145 | ,495 | 70,173 | 1  | ,000 | ,016   |

Variables in the Equation

|            | 95% C.I. for EXP(B) |       |
|------------|---------------------|-------|
|            | Lower               | Upper |
| weekday(1) | ,563                | 1,413 |
| weekday(2) | ,527                | 1,339 |
| weekday(3) | ,641                | 1,573 |
| weekday(4) | ,582                | 1,466 |
| weekday(5) | ,411                | 1,130 |
| weekday(6) | ,553                | 1,410 |
| holiday(1) | ,137                | 1,412 |
| season     |                     |       |
| season(1)  | ,720                | 1,562 |
| season(2)  | ,520                | 1,134 |
| season(3)  | ,859                | 1,806 |
| season(4)  | ,583                | 1,346 |
| Constant   |                     |       |

a. Variable(s) entered on step 1: sv3, VASTY2, weekday, holiday, season.

```
LOGISTIC REGRESSION VARIABLES handlt1
/METHOD=ENTER sv5 VASTY2 weekday holiday season
/CONTRAST (sv5)=Indicator(1)
/CONTRAST (VASTY2)=Indicator(1)
/CONTRAST (weekday)=Indicator(1)
/CONTRAST (holiday)=Indicator(1)
/CONTRAST (season)=Indicator(1)
/PRINT=CI(95)
/CRITERIA=PIN(0.05) POUT(0.10) ITERATE(20) CUT(0.5).
```



## Logistic Regression

[DataSet6] C:\cWordjan\Rafaela\_VCS\alla\_tillsammans\abo\_bjo\_vasa\_v1.sav

### Case Processing Summary

| Unweighted Cases <sup>a</sup> |                      | N     | Percent |
|-------------------------------|----------------------|-------|---------|
| Selected Cases                | Included in Analysis | 12475 | 100,0   |
|                               | Missing Cases        | 0     | ,0      |
|                               | Total                | 12475 | 100,0   |
| Unselected Cases              |                      | 0     | ,0      |
| Total                         |                      | 12475 | 100,0   |

a. If weight is in effect, see classification table for the total number of cases.

### Dependent Variable Encoding

| Original Value            | Internal Value |
|---------------------------|----------------|
| 0 ingen eller en händelse | 0              |
| 1 mer än en händelse      | 1              |

### Categorical Variables Codings

|                                     | Frequency | Parameter |
|-------------------------------------|-----------|-----------|
|                                     |           | (1)       |
| VASTY2 (SAIR*10000)+VASTY 403073101 | 365       | ,000      |
| 403073102                           | 362       | 1,000     |
| 403073103                           | 365       | ,000      |
| 403073202                           | 365       | ,000      |
| 403073203                           | 365       | ,000      |
| 403073204                           | 330       | ,000      |
| 403073303                           | 364       | ,000      |
| 403073651                           | 362       | ,000      |
| 403073771                           | 365       | ,000      |
| 403133102                           | 341       | ,000      |
| 403133106                           | 365       | ,000      |
| 403133107                           | 365       | ,000      |
| 403133109                           | 365       | ,000      |
| 403133202                           | 365       | ,000      |
| 403133203                           | 365       | ,000      |
| 403133204                           | 365       | ,000      |
| 403133315                           | 177       | ,000      |
| 403133322                           | 365       | ,000      |
| 403133401                           | 362       | ,000      |
| 403133402                           | 365       | ,000      |
| 403133550                           | 298       | ,000      |
| 403133772                           | 365       | ,000      |
| 403135803                           | 365       | ,000      |

## Categorical Variables Codings

|                           |           | Parameter coding |       |
|---------------------------|-----------|------------------|-------|
|                           |           | (2)              | (3)   |
| VASTY2 (SAIR*10000)+VASTY | 403073101 | ,000             | ,000  |
|                           | 403073102 | ,000             | ,000  |
|                           | 403073103 | 1,000            | ,000  |
|                           | 403073202 | ,000             | 1,000 |
|                           | 403073203 | ,000             | ,000  |
|                           | 403073204 | ,000             | ,000  |
|                           | 403073303 | ,000             | ,000  |
|                           | 403073651 | ,000             | ,000  |
|                           | 403073771 | ,000             | ,000  |
|                           | 403133102 | ,000             | ,000  |
|                           | 403133106 | ,000             | ,000  |
|                           | 403133107 | ,000             | ,000  |
|                           | 403133109 | ,000             | ,000  |
|                           | 403133202 | ,000             | ,000  |
|                           | 403133203 | ,000             | ,000  |
|                           | 403133204 | ,000             | ,000  |
|                           | 403133315 | ,000             | ,000  |
|                           | 403133322 | ,000             | ,000  |
|                           | 403133401 | ,000             | ,000  |
|                           | 403133402 | ,000             | ,000  |
|                           | 403133550 | ,000             | ,000  |
|                           | 403133772 | ,000             | ,000  |
|                           | 403135803 | ,000             | ,000  |

**Categorical Variables Codings**

|                           |           | Parameter coding |       |
|---------------------------|-----------|------------------|-------|
|                           |           | (4)              | (5)   |
| VASTY2 (SAIR*10000)+VASTY | 403073101 | ,000             | ,000  |
|                           | 403073102 | ,000             | ,000  |
|                           | 403073103 | ,000             | ,000  |
|                           | 403073202 | ,000             | ,000  |
|                           | 403073203 | 1,000            | ,000  |
|                           | 403073204 | ,000             | 1,000 |
|                           | 403073303 | ,000             | ,000  |
|                           | 403073651 | ,000             | ,000  |
|                           | 403073771 | ,000             | ,000  |
|                           | 403133102 | ,000             | ,000  |
|                           | 403133106 | ,000             | ,000  |
|                           | 403133107 | ,000             | ,000  |
|                           | 403133109 | ,000             | ,000  |
|                           | 403133202 | ,000             | ,000  |
|                           | 403133203 | ,000             | ,000  |
|                           | 403133204 | ,000             | ,000  |
|                           | 403133315 | ,000             | ,000  |
|                           | 403133322 | ,000             | ,000  |
|                           | 403133401 | ,000             | ,000  |
|                           | 403133402 | ,000             | ,000  |
|                           | 403133550 | ,000             | ,000  |
|                           | 403133772 | ,000             | ,000  |
|                           | 403135803 | ,000             | ,000  |

Peer Review Only

## Categorical Variables Codings

|                           |           | Parameter coding |       |
|---------------------------|-----------|------------------|-------|
|                           |           | (6)              | (7)   |
| VASTY2 (SAIR*10000)+VASTY | 403073101 | ,000             | ,000  |
|                           | 403073102 | ,000             | ,000  |
|                           | 403073103 | ,000             | ,000  |
|                           | 403073202 | ,000             | ,000  |
|                           | 403073203 | ,000             | ,000  |
|                           | 403073204 | ,000             | ,000  |
|                           | 403073303 | 1,000            | ,000  |
|                           | 403073651 | ,000             | 1,000 |
|                           | 403073771 | ,000             | ,000  |
|                           | 403133102 | ,000             | ,000  |
|                           | 403133106 | ,000             | ,000  |
|                           | 403133107 | ,000             | ,000  |
|                           | 403133109 | ,000             | ,000  |
|                           | 403133202 | ,000             | ,000  |
|                           | 403133203 | ,000             | ,000  |
|                           | 403133204 | ,000             | ,000  |
|                           | 403133315 | ,000             | ,000  |
|                           | 403133322 | ,000             | ,000  |
|                           | 403133401 | ,000             | ,000  |
|                           | 403133402 | ,000             | ,000  |
|                           | 403133550 | ,000             | ,000  |
|                           | 403133772 | ,000             | ,000  |
|                           | 403135803 | ,000             | ,000  |

1  
2  
3  
4  
5  
6  
7  
8  
9  
10  
11  
12  
13  
14  
15  
16  
17  
18  
19  
20  
21  
22  
23  
24  
25  
26  
27  
28  
29  
30  
31  
32  
33  
34  
35  
36  
37  
38  
39  
40  
41  
42  
43  
44  
45  
46  
47  
48  
49  
50  
51  
52  
53  
54  
55  
56  
57  
58  
59  
60

**Categorical Variables Codings**

|                           |           | Parameter coding |       |
|---------------------------|-----------|------------------|-------|
|                           |           | (8)              | (9)   |
| VASTY2 (SAIR*10000)+VASTY | 403073101 | ,000             | ,000  |
|                           | 403073102 | ,000             | ,000  |
|                           | 403073103 | ,000             | ,000  |
|                           | 403073202 | ,000             | ,000  |
|                           | 403073203 | ,000             | ,000  |
|                           | 403073204 | ,000             | ,000  |
|                           | 403073303 | ,000             | ,000  |
|                           | 403073651 | ,000             | ,000  |
|                           | 403073771 | 1,000            | ,000  |
|                           | 403133102 | ,000             | 1,000 |
|                           | 403133106 | ,000             | ,000  |
|                           | 403133107 | ,000             | ,000  |
|                           | 403133109 | ,000             | ,000  |
|                           | 403133202 | ,000             | ,000  |
|                           | 403133203 | ,000             | ,000  |
|                           | 403133204 | ,000             | ,000  |
|                           | 403133315 | ,000             | ,000  |
|                           | 403133322 | ,000             | ,000  |
|                           | 403133401 | ,000             | ,000  |
|                           | 403133402 | ,000             | ,000  |
|                           | 403133550 | ,000             | ,000  |
|                           | 403133772 | ,000             | ,000  |
|                           | 403135803 | ,000             | ,000  |

Peer review only

## Categorical Variables Codings

|                           |           | Parameter coding |       |
|---------------------------|-----------|------------------|-------|
|                           |           | (10)             | (11)  |
| VASTY2 (SAIR*10000)+VASTY | 403073101 | ,000             | ,000  |
|                           | 403073102 | ,000             | ,000  |
|                           | 403073103 | ,000             | ,000  |
|                           | 403073202 | ,000             | ,000  |
|                           | 403073203 | ,000             | ,000  |
|                           | 403073204 | ,000             | ,000  |
|                           | 403073303 | ,000             | ,000  |
|                           | 403073651 | ,000             | ,000  |
|                           | 403073771 | ,000             | ,000  |
|                           | 403133102 | ,000             | ,000  |
|                           | 403133106 | 1,000            | ,000  |
|                           | 403133107 | ,000             | 1,000 |
|                           | 403133109 | ,000             | ,000  |
|                           | 403133202 | ,000             | ,000  |
|                           | 403133203 | ,000             | ,000  |
|                           | 403133204 | ,000             | ,000  |
|                           | 403133315 | ,000             | ,000  |
|                           | 403133322 | ,000             | ,000  |
|                           | 403133401 | ,000             | ,000  |
|                           | 403133402 | ,000             | ,000  |
|                           | 403133550 | ,000             | ,000  |
|                           | 403133772 | ,000             | ,000  |
|                           | 403135803 | ,000             | ,000  |

**Categorical Variables Codings**

|                           |           | Parameter coding |       |
|---------------------------|-----------|------------------|-------|
|                           |           | (12)             | (13)  |
| VASTY2 (SAIR*10000)+VASTY | 403073101 | ,000             | ,000  |
|                           | 403073102 | ,000             | ,000  |
|                           | 403073103 | ,000             | ,000  |
|                           | 403073202 | ,000             | ,000  |
|                           | 403073203 | ,000             | ,000  |
|                           | 403073204 | ,000             | ,000  |
|                           | 403073303 | ,000             | ,000  |
|                           | 403073651 | ,000             | ,000  |
|                           | 403073771 | ,000             | ,000  |
|                           | 403133102 | ,000             | ,000  |
|                           | 403133106 | ,000             | ,000  |
|                           | 403133107 | ,000             | ,000  |
|                           | 403133109 | 1,000            | ,000  |
|                           | 403133202 | ,000             | 1,000 |
|                           | 403133203 | ,000             | ,000  |
|                           | 403133204 | ,000             | ,000  |
|                           | 403133315 | ,000             | ,000  |
|                           | 403133322 | ,000             | ,000  |
|                           | 403133401 | ,000             | ,000  |
|                           | 403133402 | ,000             | ,000  |
|                           | 403133550 | ,000             | ,000  |
|                           | 403133772 | ,000             | ,000  |
|                           | 403135803 | ,000             | ,000  |

Peer Review Only

## Categorical Variables Codings

|                           |           | Parameter coding |       |
|---------------------------|-----------|------------------|-------|
|                           |           | (14)             | (15)  |
| VASTY2 (SAIR*10000)+VASTY | 403073101 | ,000             | ,000  |
|                           | 403073102 | ,000             | ,000  |
|                           | 403073103 | ,000             | ,000  |
|                           | 403073202 | ,000             | ,000  |
|                           | 403073203 | ,000             | ,000  |
|                           | 403073204 | ,000             | ,000  |
|                           | 403073303 | ,000             | ,000  |
|                           | 403073651 | ,000             | ,000  |
|                           | 403073771 | ,000             | ,000  |
|                           | 403133102 | ,000             | ,000  |
|                           | 403133106 | ,000             | ,000  |
|                           | 403133107 | ,000             | ,000  |
|                           | 403133109 | ,000             | ,000  |
|                           | 403133202 | ,000             | ,000  |
|                           | 403133203 | 1,000            | ,000  |
|                           | 403133204 | ,000             | 1,000 |
|                           | 403133315 | ,000             | ,000  |
|                           | 403133322 | ,000             | ,000  |
|                           | 403133401 | ,000             | ,000  |
|                           | 403133402 | ,000             | ,000  |
|                           | 403133550 | ,000             | ,000  |
|                           | 403133772 | ,000             | ,000  |
|                           | 403135803 | ,000             | ,000  |



**Categorical Variables Codings**

|                           |           | Parameter coding |       |
|---------------------------|-----------|------------------|-------|
|                           |           | (16)             | (17)  |
| VASTY2 (SAIR*10000)+VASTY | 403073101 | ,000             | ,000  |
|                           | 403073102 | ,000             | ,000  |
|                           | 403073103 | ,000             | ,000  |
|                           | 403073202 | ,000             | ,000  |
|                           | 403073203 | ,000             | ,000  |
|                           | 403073204 | ,000             | ,000  |
|                           | 403073303 | ,000             | ,000  |
|                           | 403073651 | ,000             | ,000  |
|                           | 403073771 | ,000             | ,000  |
|                           | 403133102 | ,000             | ,000  |
|                           | 403133106 | ,000             | ,000  |
|                           | 403133107 | ,000             | ,000  |
|                           | 403133109 | ,000             | ,000  |
|                           | 403133202 | ,000             | ,000  |
|                           | 403133203 | ,000             | ,000  |
|                           | 403133204 | ,000             | ,000  |
|                           | 403133315 | 1,000            | ,000  |
|                           | 403133322 | ,000             | 1,000 |
|                           | 403133401 | ,000             | ,000  |
|                           | 403133402 | ,000             | ,000  |
|                           | 403133550 | ,000             | ,000  |
|                           | 403133772 | ,000             | ,000  |
|                           | 403135803 | ,000             | ,000  |

Peer Review Only

## Categorical Variables Codings

|                           |           | Parameter coding |       |
|---------------------------|-----------|------------------|-------|
|                           |           | (18)             | (19)  |
| VASTY2 (SAIR*10000)+VASTY | 403073101 | ,000             | ,000  |
|                           | 403073102 | ,000             | ,000  |
|                           | 403073103 | ,000             | ,000  |
|                           | 403073202 | ,000             | ,000  |
|                           | 403073203 | ,000             | ,000  |
|                           | 403073204 | ,000             | ,000  |
|                           | 403073303 | ,000             | ,000  |
|                           | 403073651 | ,000             | ,000  |
|                           | 403073771 | ,000             | ,000  |
|                           | 403133102 | ,000             | ,000  |
|                           | 403133106 | ,000             | ,000  |
|                           | 403133107 | ,000             | ,000  |
|                           | 403133109 | ,000             | ,000  |
|                           | 403133202 | ,000             | ,000  |
|                           | 403133203 | ,000             | ,000  |
|                           | 403133204 | ,000             | ,000  |
|                           | 403133315 | ,000             | ,000  |
|                           | 403133322 | ,000             | ,000  |
|                           | 403133401 | 1,000            | ,000  |
|                           | 403133402 | ,000             | 1,000 |
|                           | 403133550 | ,000             | ,000  |
|                           | 403133772 | ,000             | ,000  |
|                           | 403135803 | ,000             | ,000  |

**Categorical Variables Codings**

|                           |           | Parameter coding |       |
|---------------------------|-----------|------------------|-------|
|                           |           | (20)             | (21)  |
| VASTY2 (SAIR*10000)+VASTY | 403073101 | ,000             | ,000  |
|                           | 403073102 | ,000             | ,000  |
|                           | 403073103 | ,000             | ,000  |
|                           | 403073202 | ,000             | ,000  |
|                           | 403073203 | ,000             | ,000  |
|                           | 403073204 | ,000             | ,000  |
|                           | 403073303 | ,000             | ,000  |
|                           | 403073651 | ,000             | ,000  |
|                           | 403073771 | ,000             | ,000  |
|                           | 403133102 | ,000             | ,000  |
|                           | 403133106 | ,000             | ,000  |
|                           | 403133107 | ,000             | ,000  |
|                           | 403133109 | ,000             | ,000  |
|                           | 403133202 | ,000             | ,000  |
|                           | 403133203 | ,000             | ,000  |
|                           | 403133204 | ,000             | ,000  |
|                           | 403133315 | ,000             | ,000  |
|                           | 403133322 | ,000             | ,000  |
|                           | 403133401 | ,000             | ,000  |
|                           | 403133402 | ,000             | ,000  |
|                           | 403133550 | 1,000            | ,000  |
|                           | 403133772 | ,000             | 1,000 |
|                           | 403135803 | ,000             | ,000  |

Peer Review Only

## Categorical Variables Codings

|                           |           | Parameter coding |      |
|---------------------------|-----------|------------------|------|
|                           |           | (22)             | (23) |
| VASTY2 (SAIR*10000)+VASTY | 403073101 | ,000             | ,000 |
|                           | 403073102 | ,000             | ,000 |
|                           | 403073103 | ,000             | ,000 |
|                           | 403073202 | ,000             | ,000 |
|                           | 403073203 | ,000             | ,000 |
|                           | 403073204 | ,000             | ,000 |
|                           | 403073303 | ,000             | ,000 |
|                           | 403073651 | ,000             | ,000 |
|                           | 403073771 | ,000             | ,000 |
|                           | 403133102 | ,000             | ,000 |
|                           | 403133106 | ,000             | ,000 |
|                           | 403133107 | ,000             | ,000 |
|                           | 403133109 | ,000             | ,000 |
|                           | 403133202 | ,000             | ,000 |
|                           | 403133203 | ,000             | ,000 |
|                           | 403133204 | ,000             | ,000 |
|                           | 403133315 | ,000             | ,000 |
|                           | 403133322 | ,000             | ,000 |
|                           | 403133401 | ,000             | ,000 |
|                           | 403133402 | ,000             | ,000 |
|                           | 403133550 | ,000             | ,000 |
|                           | 403133772 | ,000             | ,000 |
|                           | 403135803 | 1,000            | ,000 |

**Categorical Variables Codings**

|                           |           | Parameter coding |      |
|---------------------------|-----------|------------------|------|
|                           |           | (24)             | (25) |
| VASTY2 (SAIR*10000)+VASTY | 403073101 | ,000             | ,000 |
|                           | 403073102 | ,000             | ,000 |
|                           | 403073103 | ,000             | ,000 |
|                           | 403073202 | ,000             | ,000 |
|                           | 403073203 | ,000             | ,000 |
|                           | 403073204 | ,000             | ,000 |
|                           | 403073303 | ,000             | ,000 |
|                           | 403073651 | ,000             | ,000 |
|                           | 403073771 | ,000             | ,000 |
|                           | 403133102 | ,000             | ,000 |
|                           | 403133106 | ,000             | ,000 |
|                           | 403133107 | ,000             | ,000 |
|                           | 403133109 | ,000             | ,000 |
|                           | 403133202 | ,000             | ,000 |
|                           | 403133203 | ,000             | ,000 |
|                           | 403133204 | ,000             | ,000 |
|                           | 403133315 | ,000             | ,000 |
|                           | 403133322 | ,000             | ,000 |
|                           | 403133401 | ,000             | ,000 |
|                           | 403133402 | ,000             | ,000 |
|                           | 403133550 | ,000             | ,000 |
|                           | 403133772 | ,000             | ,000 |
|                           | 403135803 | ,000             | ,000 |

Peer review only

## Categorical Variables Codings

|                           |           | Parameter coding |      |
|---------------------------|-----------|------------------|------|
|                           |           | (26)             | (27) |
| VASTY2 (SAIR*10000)+VASTY | 403073101 | ,000             | ,000 |
|                           | 403073102 | ,000             | ,000 |
|                           | 403073103 | ,000             | ,000 |
|                           | 403073202 | ,000             | ,000 |
|                           | 403073203 | ,000             | ,000 |
|                           | 403073204 | ,000             | ,000 |
|                           | 403073303 | ,000             | ,000 |
|                           | 403073651 | ,000             | ,000 |
|                           | 403073771 | ,000             | ,000 |
|                           | 403133102 | ,000             | ,000 |
|                           | 403133106 | ,000             | ,000 |
|                           | 403133107 | ,000             | ,000 |
|                           | 403133109 | ,000             | ,000 |
|                           | 403133202 | ,000             | ,000 |
|                           | 403133203 | ,000             | ,000 |
|                           | 403133204 | ,000             | ,000 |
|                           | 403133315 | ,000             | ,000 |
|                           | 403133322 | ,000             | ,000 |
|                           | 403133401 | ,000             | ,000 |
|                           | 403133402 | ,000             | ,000 |
|                           | 403133550 | ,000             | ,000 |
|                           | 403133772 | ,000             | ,000 |
|                           | 403135803 | ,000             | ,000 |

## Categorical Variables Codings

|                           |           | Parameter coding |      |
|---------------------------|-----------|------------------|------|
|                           |           | (28)             | (29) |
| VASTY2 (SAIR*10000)+VASTY | 403073101 | ,000             | ,000 |
|                           | 403073102 | ,000             | ,000 |
|                           | 403073103 | ,000             | ,000 |
|                           | 403073202 | ,000             | ,000 |
|                           | 403073203 | ,000             | ,000 |
|                           | 403073204 | ,000             | ,000 |
|                           | 403073303 | ,000             | ,000 |
|                           | 403073651 | ,000             | ,000 |
|                           | 403073771 | ,000             | ,000 |
|                           | 403133102 | ,000             | ,000 |
|                           | 403133106 | ,000             | ,000 |
|                           | 403133107 | ,000             | ,000 |
|                           | 403133109 | ,000             | ,000 |
|                           | 403133202 | ,000             | ,000 |
|                           | 403133203 | ,000             | ,000 |
|                           | 403133204 | ,000             | ,000 |
|                           | 403133315 | ,000             | ,000 |
|                           | 403133322 | ,000             | ,000 |
|                           | 403133401 | ,000             | ,000 |
|                           | 403133402 | ,000             | ,000 |
|                           | 403133550 | ,000             | ,000 |
|                           | 403133772 | ,000             | ,000 |
|                           | 403135803 | ,000             | ,000 |

## Categorical Variables Codings

|                           |           | Parameter coding |      |
|---------------------------|-----------|------------------|------|
|                           |           | (30)             | (31) |
| VASTY2 (SAIR*10000)+VASTY | 403073101 | ,000             | ,000 |
|                           | 403073102 | ,000             | ,000 |
|                           | 403073103 | ,000             | ,000 |
|                           | 403073202 | ,000             | ,000 |
|                           | 403073203 | ,000             | ,000 |
|                           | 403073204 | ,000             | ,000 |
|                           | 403073303 | ,000             | ,000 |
|                           | 403073651 | ,000             | ,000 |
|                           | 403073771 | ,000             | ,000 |
|                           | 403133102 | ,000             | ,000 |
|                           | 403133106 | ,000             | ,000 |
|                           | 403133107 | ,000             | ,000 |
|                           | 403133109 | ,000             | ,000 |
|                           | 403133202 | ,000             | ,000 |
|                           | 403133203 | ,000             | ,000 |
|                           | 403133204 | ,000             | ,000 |
|                           | 403133315 | ,000             | ,000 |
|                           | 403133322 | ,000             | ,000 |
|                           | 403133401 | ,000             | ,000 |
|                           | 403133402 | ,000             | ,000 |
|                           | 403133550 | ,000             | ,000 |
|                           | 403133772 | ,000             | ,000 |
|                           | 403135803 | ,000             | ,000 |



**Categorical Variables Codings**

|                           |           | Parameter coding |      |
|---------------------------|-----------|------------------|------|
|                           |           | (32)             | (33) |
| VASTY2 (SAIR*10000)+VASTY | 403073101 | ,000             | ,000 |
|                           | 403073102 | ,000             | ,000 |
|                           | 403073103 | ,000             | ,000 |
|                           | 403073202 | ,000             | ,000 |
|                           | 403073203 | ,000             | ,000 |
|                           | 403073204 | ,000             | ,000 |
|                           | 403073303 | ,000             | ,000 |
|                           | 403073651 | ,000             | ,000 |
|                           | 403073771 | ,000             | ,000 |
|                           | 403133102 | ,000             | ,000 |
|                           | 403133106 | ,000             | ,000 |
|                           | 403133107 | ,000             | ,000 |
|                           | 403133109 | ,000             | ,000 |
|                           | 403133202 | ,000             | ,000 |
|                           | 403133203 | ,000             | ,000 |
|                           | 403133204 | ,000             | ,000 |
|                           | 403133315 | ,000             | ,000 |
|                           | 403133322 | ,000             | ,000 |
|                           | 403133401 | ,000             | ,000 |
|                           | 403133402 | ,000             | ,000 |
|                           | 403133550 | ,000             | ,000 |
|                           | 403133772 | ,000             | ,000 |
|                           | 403135803 | ,000             | ,000 |

Peer Review Only

## Categorical Variables Codings

|                           |           | Parameter coding |      |
|---------------------------|-----------|------------------|------|
|                           |           | (34)             | (35) |
| VASTY2 (SAIR*10000)+VASTY | 403073101 | ,000             | ,000 |
|                           | 403073102 | ,000             | ,000 |
|                           | 403073103 | ,000             | ,000 |
|                           | 403073202 | ,000             | ,000 |
|                           | 403073203 | ,000             | ,000 |
|                           | 403073204 | ,000             | ,000 |
|                           | 403073303 | ,000             | ,000 |
|                           | 403073651 | ,000             | ,000 |
|                           | 403073771 | ,000             | ,000 |
|                           | 403133102 | ,000             | ,000 |
|                           | 403133106 | ,000             | ,000 |
|                           | 403133107 | ,000             | ,000 |
|                           | 403133109 | ,000             | ,000 |
|                           | 403133202 | ,000             | ,000 |
|                           | 403133203 | ,000             | ,000 |
|                           | 403133204 | ,000             | ,000 |
|                           | 403133315 | ,000             | ,000 |
|                           | 403133322 | ,000             | ,000 |
|                           | 403133401 | ,000             | ,000 |
|                           | 403133402 | ,000             | ,000 |
|                           | 403133550 | ,000             | ,000 |
|                           | 403133772 | ,000             | ,000 |
|                           | 403135803 | ,000             | ,000 |

## Categorical Variables Codings

|                            |                                         | Frequency | Parameter<br>(1) |
|----------------------------|-----------------------------------------|-----------|------------------|
|                            | 404060001                               | 365       | ,000             |
|                            | 404060002                               | 366       | ,000             |
|                            | 404310003                               | 291       | ,000             |
|                            | 404310004                               | 291       | ,000             |
|                            | 502300005                               | 366       | ,000             |
|                            | 502300006                               | 225       | ,000             |
|                            | 502300007                               | 366       | ,000             |
|                            | 502300214                               | 366       | ,000             |
|                            | 502300411                               | 366       | ,000             |
|                            | 502300415                               | 360       | ,000             |
|                            | 502300416                               | 363       | ,000             |
|                            | 502300811                               | 364       | ,000             |
|                            | 502300913                               | 315       | ,000             |
| weekday veckodag           | 1 måndag                                | 1805      | ,000             |
|                            | 2 tisdag                                | 1812      | 1,000            |
|                            | 3 onsdag                                | 1800      | ,000             |
|                            | 4 torsdag                               | 1794      | ,000             |
|                            | 5 fredag                                | 1788      | ,000             |
|                            | 6 lördag                                | 1735      | ,000             |
|                            | 7 söndag                                | 1741      | ,000             |
| season säsong/period       | 1 januari-mars                          | 3182      | ,000             |
|                            | 2 april-maj                             | 2127      | 1,000            |
|                            | 3 juni-augusti                          | 2911      | ,000             |
|                            | 4 september-oktober                     | 2144      | ,000             |
|                            | 5 november-december                     | 2111      | ,000             |
| sv5 kvintiler för standard | 1 tredje kvintilen                      | 1863      | ,000             |
|                            | 2 första kvintilen                      | 3570      | 1,000            |
|                            | 3 andra kvintilen                       | 1759      | ,000             |
|                            | 4 fjärde kvintilen                      | 2327      | ,000             |
|                            | 5 femte kvintilen                       | 2956      | ,000             |
| holiday större helg        | 1 ingen större helg                     | 12078     | ,000             |
|                            | 2 större helg (påsk/midsommar/julonyår) | 397       | 1,000            |

## Categorical Variables Codings

|                            |                                         | Parameter coding |       |
|----------------------------|-----------------------------------------|------------------|-------|
|                            |                                         | (2)              | (3)   |
|                            | 404060001                               | ,000             | ,000  |
|                            | 404060002                               | ,000             | ,000  |
|                            | 404310003                               | ,000             | ,000  |
|                            | 404310004                               | ,000             | ,000  |
|                            | 502300005                               | ,000             | ,000  |
|                            | 502300006                               | ,000             | ,000  |
|                            | 502300007                               | ,000             | ,000  |
|                            | 502300214                               | ,000             | ,000  |
|                            | 502300411                               | ,000             | ,000  |
|                            | 502300415                               | ,000             | ,000  |
|                            | 502300416                               | ,000             | ,000  |
|                            | 502300811                               | ,000             | ,000  |
|                            | 502300913                               | ,000             | ,000  |
| weekday veckodag           | 1 måndag                                | ,000             | ,000  |
|                            | 2 tisdag                                | ,000             | ,000  |
|                            | 3 onsdag                                | 1,000            | ,000  |
|                            | 4 torsdag                               | ,000             | 1,000 |
|                            | 5 fredag                                | ,000             | ,000  |
|                            | 6 lördag                                | ,000             | ,000  |
|                            | 7 söndag                                | ,000             | ,000  |
| season säsong/period       | 1 januari-mars                          | ,000             | ,000  |
|                            | 2 april-maj                             | ,000             | ,000  |
|                            | 3 juni-augusti                          | 1,000            | ,000  |
|                            | 4 september-oktober                     | ,000             | 1,000 |
|                            | 5 november-december                     | ,000             | ,000  |
| sv5 kvintiler för standard | 1 tredje kvintilen                      | ,000             | ,000  |
|                            | 2 första kvintilen                      | ,000             | ,000  |
|                            | 3 andra kvintilen                       | 1,000            | ,000  |
|                            | 4 fjärde kvintilen                      | ,000             | 1,000 |
|                            | 5 femte kvintilen                       | ,000             | ,000  |
| holiday större helg        | 1 ingen större helg                     |                  |       |
|                            | 2 större helg (påsk/midsommar/julonyår) |                  |       |

## Categorical Variables Codings

|                            |                                         | Parameter coding |       |
|----------------------------|-----------------------------------------|------------------|-------|
|                            |                                         | (4)              | (5)   |
|                            | 404060001                               | ,000             | ,000  |
|                            | 404060002                               | ,000             | ,000  |
|                            | 404310003                               | ,000             | ,000  |
|                            | 404310004                               | ,000             | ,000  |
|                            | 502300005                               | ,000             | ,000  |
|                            | 502300006                               | ,000             | ,000  |
|                            | 502300007                               | ,000             | ,000  |
|                            | 502300214                               | ,000             | ,000  |
|                            | 502300411                               | ,000             | ,000  |
|                            | 502300415                               | ,000             | ,000  |
|                            | 502300416                               | ,000             | ,000  |
|                            | 502300811                               | ,000             | ,000  |
|                            | 502300913                               | ,000             | ,000  |
| weekday veckodag           | 1 måndag                                | ,000             | ,000  |
|                            | 2 tisdag                                | ,000             | ,000  |
|                            | 3 onsdag                                | ,000             | ,000  |
|                            | 4 torsdag                               | ,000             | ,000  |
|                            | 5 fredag                                | 1,000            | ,000  |
|                            | 6 lördag                                | ,000             | 1,000 |
|                            | 7 söndag                                | ,000             | ,000  |
| season säsong/period       | 1 januari-mars                          | ,000             |       |
|                            | 2 april-maj                             | ,000             |       |
|                            | 3 juni-augusti                          | ,000             |       |
|                            | 4 september-oktober                     | ,000             |       |
|                            | 5 november-december                     | 1,000            |       |
| sv5 kvintiler för standard | 1 tredje kvintilen                      | ,000             |       |
|                            | 2 första kvintilen                      | ,000             |       |
|                            | 3 andra kvintilen                       | ,000             |       |
|                            | 4 fjärde kvintilen                      | ,000             |       |
|                            | 5 femte kvintilen                       | 1,000            |       |
| holiday större helg        | 1 ingen större helg                     |                  |       |
|                            | 2 större helg (påsk/midsommar/julonyår) |                  |       |

## Categorical Variables Codings

|                            |                                         | Parameter coding |      |
|----------------------------|-----------------------------------------|------------------|------|
|                            |                                         | (6)              | (7)  |
|                            | 404060001                               | ,000             | ,000 |
|                            | 404060002                               | ,000             | ,000 |
|                            | 404310003                               | ,000             | ,000 |
|                            | 404310004                               | ,000             | ,000 |
|                            | 502300005                               | ,000             | ,000 |
|                            | 502300006                               | ,000             | ,000 |
|                            | 502300007                               | ,000             | ,000 |
|                            | 502300214                               | ,000             | ,000 |
|                            | 502300411                               | ,000             | ,000 |
|                            | 502300415                               | ,000             | ,000 |
|                            | 502300416                               | ,000             | ,000 |
|                            | 502300811                               | ,000             | ,000 |
|                            | 502300913                               | ,000             | ,000 |
| weekday veckodag           | 1 måndag                                | ,000             |      |
|                            | 2 tisdag                                | ,000             |      |
|                            | 3 onsdag                                | ,000             |      |
|                            | 4 torsdag                               | ,000             |      |
|                            | 5 fredag                                | ,000             |      |
|                            | 6 lördag                                | ,000             |      |
|                            | 7 söndag                                | 1,000            |      |
| season säsong/period       | 1 januari-mars                          |                  |      |
|                            | 2 april-maj                             |                  |      |
|                            | 3 juni-augusti                          |                  |      |
|                            | 4 september-oktober                     |                  |      |
|                            | 5 november-december                     |                  |      |
| sv5 kvintiler för standard | 1 tredje kvintilen                      |                  |      |
|                            | 2 första kvintilen                      |                  |      |
|                            | 3 andra kvintilen                       |                  |      |
|                            | 4 fjärde kvintilen                      |                  |      |
|                            | 5 femte kvintilen                       |                  |      |
| holiday större helg        | 1 ingen större helg                     |                  |      |
|                            | 2 större helg (påsk/midsommar/julonyår) |                  |      |

## Categorical Variables Codings

|                            |                                         | Parameter coding |      |
|----------------------------|-----------------------------------------|------------------|------|
|                            |                                         | (8)              | (9)  |
|                            | 404060001                               | ,000             | ,000 |
|                            | 404060002                               | ,000             | ,000 |
|                            | 404310003                               | ,000             | ,000 |
|                            | 404310004                               | ,000             | ,000 |
|                            | 502300005                               | ,000             | ,000 |
|                            | 502300006                               | ,000             | ,000 |
|                            | 502300007                               | ,000             | ,000 |
|                            | 502300214                               | ,000             | ,000 |
|                            | 502300411                               | ,000             | ,000 |
|                            | 502300415                               | ,000             | ,000 |
|                            | 502300416                               | ,000             | ,000 |
|                            | 502300811                               | ,000             | ,000 |
|                            | 502300913                               | ,000             | ,000 |
| weekday veckodag           | 1 måndag                                |                  |      |
|                            | 2 tisdag                                |                  |      |
|                            | 3 onsdag                                |                  |      |
|                            | 4 torsdag                               |                  |      |
|                            | 5 fredag                                |                  |      |
|                            | 6 lördag                                |                  |      |
|                            | 7 söndag                                |                  |      |
| season säsong/period       | 1 januari-mars                          |                  |      |
|                            | 2 april-maj                             |                  |      |
|                            | 3 juni-augusti                          |                  |      |
|                            | 4 september-oktober                     |                  |      |
|                            | 5 november-december                     |                  |      |
| sv5 kvintiler för standard | 1 tredje kvintilen                      |                  |      |
|                            | 2 första kvintilen                      |                  |      |
|                            | 3 andra kvintilen                       |                  |      |
|                            | 4 fjärde kvintilen                      |                  |      |
|                            | 5 femte kvintilen                       |                  |      |
| holiday större helg        | 1 ingen större helg                     |                  |      |
|                            | 2 större helg (påsk/midsommar/julonyår) |                  |      |

## Categorical Variables Codings

|                            |                                         | Parameter coding |      |
|----------------------------|-----------------------------------------|------------------|------|
|                            |                                         | (10)             | (11) |
|                            | 404060001                               | ,000             | ,000 |
|                            | 404060002                               | ,000             | ,000 |
|                            | 404310003                               | ,000             | ,000 |
|                            | 404310004                               | ,000             | ,000 |
|                            | 502300005                               | ,000             | ,000 |
|                            | 502300006                               | ,000             | ,000 |
|                            | 502300007                               | ,000             | ,000 |
|                            | 502300214                               | ,000             | ,000 |
|                            | 502300411                               | ,000             | ,000 |
|                            | 502300415                               | ,000             | ,000 |
|                            | 502300416                               | ,000             | ,000 |
|                            | 502300811                               | ,000             | ,000 |
|                            | 502300913                               | ,000             | ,000 |
| weekday veckodag           | 1 måndag                                |                  |      |
|                            | 2 tisdag                                |                  |      |
|                            | 3 onsdag                                |                  |      |
|                            | 4 torsdag                               |                  |      |
|                            | 5 fredag                                |                  |      |
|                            | 6 lördag                                |                  |      |
|                            | 7 söndag                                |                  |      |
| season säsong/period       | 1 januari-mars                          |                  |      |
|                            | 2 april-maj                             |                  |      |
|                            | 3 juni-augusti                          |                  |      |
|                            | 4 september-oktober                     |                  |      |
|                            | 5 november-december                     |                  |      |
| sv5 kvintiler för standard | 1 tredje kvintilen                      |                  |      |
|                            | 2 första kvintilen                      |                  |      |
|                            | 3 andra kvintilen                       |                  |      |
|                            | 4 fjärde kvintilen                      |                  |      |
|                            | 5 femte kvintilen                       |                  |      |
| holiday större helg        | 1 ingen större helg                     |                  |      |
|                            | 2 större helg (påsk/midsommar/julonyår) |                  |      |



## Categorical Variables Codings

|                            |                                         | Parameter coding |      |
|----------------------------|-----------------------------------------|------------------|------|
|                            |                                         | (12)             | (13) |
|                            | 404060001                               | ,000             | ,000 |
|                            | 404060002                               | ,000             | ,000 |
|                            | 404310003                               | ,000             | ,000 |
|                            | 404310004                               | ,000             | ,000 |
|                            | 502300005                               | ,000             | ,000 |
|                            | 502300006                               | ,000             | ,000 |
|                            | 502300007                               | ,000             | ,000 |
|                            | 502300214                               | ,000             | ,000 |
|                            | 502300411                               | ,000             | ,000 |
|                            | 502300415                               | ,000             | ,000 |
|                            | 502300416                               | ,000             | ,000 |
|                            | 502300811                               | ,000             | ,000 |
|                            | 502300913                               | ,000             | ,000 |
| weekday veckodag           | 1 måndag                                |                  |      |
|                            | 2 tisdag                                |                  |      |
|                            | 3 onsdag                                |                  |      |
|                            | 4 torsdag                               |                  |      |
|                            | 5 fredag                                |                  |      |
|                            | 6 lördag                                |                  |      |
|                            | 7 söndag                                |                  |      |
| season säsong/period       | 1 januari-mars                          |                  |      |
|                            | 2 april-maj                             |                  |      |
|                            | 3 juni-augusti                          |                  |      |
|                            | 4 september-oktober                     |                  |      |
|                            | 5 november-december                     |                  |      |
| sv5 kvintiler för standard | 1 tredje kvintilen                      |                  |      |
|                            | 2 första kvintilen                      |                  |      |
|                            | 3 andra kvintilen                       |                  |      |
|                            | 4 fjärde kvintilen                      |                  |      |
|                            | 5 femte kvintilen                       |                  |      |
| holiday större helg        | 1 ingen större helg                     |                  |      |
|                            | 2 större helg (påsk/midsommar/julonyår) |                  |      |

## Categorical Variables Codings

|                            |                                         | Parameter coding |      |
|----------------------------|-----------------------------------------|------------------|------|
|                            |                                         | (14)             | (15) |
|                            | 404060001                               | ,000             | ,000 |
|                            | 404060002                               | ,000             | ,000 |
|                            | 404310003                               | ,000             | ,000 |
|                            | 404310004                               | ,000             | ,000 |
|                            | 502300005                               | ,000             | ,000 |
|                            | 502300006                               | ,000             | ,000 |
|                            | 502300007                               | ,000             | ,000 |
|                            | 502300214                               | ,000             | ,000 |
|                            | 502300411                               | ,000             | ,000 |
|                            | 502300415                               | ,000             | ,000 |
|                            | 502300416                               | ,000             | ,000 |
|                            | 502300811                               | ,000             | ,000 |
|                            | 502300913                               | ,000             | ,000 |
| weekday veckodag           | 1 måndag                                |                  |      |
|                            | 2 tisdag                                |                  |      |
|                            | 3 onsdag                                |                  |      |
|                            | 4 torsdag                               |                  |      |
|                            | 5 fredag                                |                  |      |
|                            | 6 lördag                                |                  |      |
|                            | 7 söndag                                |                  |      |
| season säsong/period       | 1 januari-mars                          |                  |      |
|                            | 2 april-maj                             |                  |      |
|                            | 3 juni-augusti                          |                  |      |
|                            | 4 september-oktober                     |                  |      |
|                            | 5 november-december                     |                  |      |
| sv5 kvintiler för standard | 1 tredje kvintilen                      |                  |      |
|                            | 2 första kvintilen                      |                  |      |
|                            | 3 andra kvintilen                       |                  |      |
|                            | 4 fjärde kvintilen                      |                  |      |
|                            | 5 femte kvintilen                       |                  |      |
| holiday större helg        | 1 ingen större helg                     |                  |      |
|                            | 2 större helg (påsk/midsommar/julonyår) |                  |      |

## Categorical Variables Codings

|                            |                                         | Parameter coding |      |
|----------------------------|-----------------------------------------|------------------|------|
|                            |                                         | (16)             | (17) |
|                            | 404060001                               | ,000             | ,000 |
|                            | 404060002                               | ,000             | ,000 |
|                            | 404310003                               | ,000             | ,000 |
|                            | 404310004                               | ,000             | ,000 |
|                            | 502300005                               | ,000             | ,000 |
|                            | 502300006                               | ,000             | ,000 |
|                            | 502300007                               | ,000             | ,000 |
|                            | 502300214                               | ,000             | ,000 |
|                            | 502300411                               | ,000             | ,000 |
|                            | 502300415                               | ,000             | ,000 |
|                            | 502300416                               | ,000             | ,000 |
|                            | 502300811                               | ,000             | ,000 |
|                            | 502300913                               | ,000             | ,000 |
| weekday veckodag           | 1 måndag                                |                  |      |
|                            | 2 tisdag                                |                  |      |
|                            | 3 onsdag                                |                  |      |
|                            | 4 torsdag                               |                  |      |
|                            | 5 fredag                                |                  |      |
|                            | 6 lördag                                |                  |      |
|                            | 7 söndag                                |                  |      |
| season säsong/period       | 1 januari-mars                          |                  |      |
|                            | 2 april-maj                             |                  |      |
|                            | 3 juni-augusti                          |                  |      |
|                            | 4 september-oktober                     |                  |      |
|                            | 5 november-december                     |                  |      |
| sv5 kvintiler för standard | 1 tredje kvintilen                      |                  |      |
|                            | 2 första kvintilen                      |                  |      |
|                            | 3 andra kvintilen                       |                  |      |
|                            | 4 fjärde kvintilen                      |                  |      |
|                            | 5 femte kvintilen                       |                  |      |
| holiday större helg        | 1 ingen större helg                     |                  |      |
|                            | 2 större helg (påsk/midsommar/julonyår) |                  |      |

## Categorical Variables Codings

|                            |                                         | Parameter coding |      |
|----------------------------|-----------------------------------------|------------------|------|
|                            |                                         | (18)             | (19) |
|                            | 404060001                               | ,000             | ,000 |
|                            | 404060002                               | ,000             | ,000 |
|                            | 404310003                               | ,000             | ,000 |
|                            | 404310004                               | ,000             | ,000 |
|                            | 502300005                               | ,000             | ,000 |
|                            | 502300006                               | ,000             | ,000 |
|                            | 502300007                               | ,000             | ,000 |
|                            | 502300214                               | ,000             | ,000 |
|                            | 502300411                               | ,000             | ,000 |
|                            | 502300415                               | ,000             | ,000 |
|                            | 502300416                               | ,000             | ,000 |
|                            | 502300811                               | ,000             | ,000 |
|                            | 502300913                               | ,000             | ,000 |
| weekday veckodag           | 1 måndag                                |                  |      |
|                            | 2 tisdag                                |                  |      |
|                            | 3 onsdag                                |                  |      |
|                            | 4 torsdag                               |                  |      |
|                            | 5 fredag                                |                  |      |
|                            | 6 lördag                                |                  |      |
|                            | 7 söndag                                |                  |      |
| season säsong/period       | 1 januari-mars                          |                  |      |
|                            | 2 april-maj                             |                  |      |
|                            | 3 juni-augusti                          |                  |      |
|                            | 4 september-oktober                     |                  |      |
|                            | 5 november-december                     |                  |      |
| sv5 kvintiler för standard | 1 tredje kvintilen                      |                  |      |
|                            | 2 första kvintilen                      |                  |      |
|                            | 3 andra kvintilen                       |                  |      |
|                            | 4 fjärde kvintilen                      |                  |      |
|                            | 5 femte kvintilen                       |                  |      |
| holiday större helg        | 1 ingen större helg                     |                  |      |
|                            | 2 större helg (påsk/midsommar/julonyår) |                  |      |

## Categorical Variables Codings

|                            |                                         | Parameter coding |      |
|----------------------------|-----------------------------------------|------------------|------|
|                            |                                         | (20)             | (21) |
|                            | 404060001                               | ,000             | ,000 |
|                            | 404060002                               | ,000             | ,000 |
|                            | 404310003                               | ,000             | ,000 |
|                            | 404310004                               | ,000             | ,000 |
|                            | 502300005                               | ,000             | ,000 |
|                            | 502300006                               | ,000             | ,000 |
|                            | 502300007                               | ,000             | ,000 |
|                            | 502300214                               | ,000             | ,000 |
|                            | 502300411                               | ,000             | ,000 |
|                            | 502300415                               | ,000             | ,000 |
|                            | 502300416                               | ,000             | ,000 |
|                            | 502300811                               | ,000             | ,000 |
|                            | 502300913                               | ,000             | ,000 |
| weekday veckodag           | 1 måndag                                |                  |      |
|                            | 2 tisdag                                |                  |      |
|                            | 3 onsdag                                |                  |      |
|                            | 4 torsdag                               |                  |      |
|                            | 5 fredag                                |                  |      |
|                            | 6 lördag                                |                  |      |
|                            | 7 söndag                                |                  |      |
| season säsong/period       | 1 januari-mars                          |                  |      |
|                            | 2 april-maj                             |                  |      |
|                            | 3 juni-augusti                          |                  |      |
|                            | 4 september-oktober                     |                  |      |
|                            | 5 november-december                     |                  |      |
| sv5 kvintiler för standard | 1 tredje kvintilen                      |                  |      |
|                            | 2 första kvintilen                      |                  |      |
|                            | 3 andra kvintilen                       |                  |      |
|                            | 4 fjärde kvintilen                      |                  |      |
|                            | 5 femte kvintilen                       |                  |      |
| holiday större helg        | 1 ingen större helg                     |                  |      |
|                            | 2 större helg (påsk/midsommar/julonyår) |                  |      |

## Categorical Variables Codings

|                            |                                         | Parameter coding |       |
|----------------------------|-----------------------------------------|------------------|-------|
|                            |                                         | (22)             | (23)  |
|                            | 404060001                               | ,000             | 1,000 |
|                            | 404060002                               | ,000             | ,000  |
|                            | 404310003                               | ,000             | ,000  |
|                            | 404310004                               | ,000             | ,000  |
|                            | 502300005                               | ,000             | ,000  |
|                            | 502300006                               | ,000             | ,000  |
|                            | 502300007                               | ,000             | ,000  |
|                            | 502300214                               | ,000             | ,000  |
|                            | 502300411                               | ,000             | ,000  |
|                            | 502300415                               | ,000             | ,000  |
|                            | 502300416                               | ,000             | ,000  |
|                            | 502300811                               | ,000             | ,000  |
|                            | 502300913                               | ,000             | ,000  |
| weekday veckodag           | 1 måndag                                |                  |       |
|                            | 2 tisdag                                |                  |       |
|                            | 3 onsdag                                |                  |       |
|                            | 4 torsdag                               |                  |       |
|                            | 5 fredag                                |                  |       |
|                            | 6 lördag                                |                  |       |
|                            | 7 söndag                                |                  |       |
| season säsong/period       | 1 januari-mars                          |                  |       |
|                            | 2 april-maj                             |                  |       |
|                            | 3 juni-augusti                          |                  |       |
|                            | 4 september-oktober                     |                  |       |
|                            | 5 november-december                     |                  |       |
| sv5 kvintiler för standard | 1 tredje kvintilen                      |                  |       |
|                            | 2 första kvintilen                      |                  |       |
|                            | 3 andra kvintilen                       |                  |       |
|                            | 4 fjärde kvintilen                      |                  |       |
|                            | 5 femte kvintilen                       |                  |       |
| holiday större helg        | 1 ingen större helg                     |                  |       |
|                            | 2 större helg (påsk/midsommar/julonyår) |                  |       |

## Categorical Variables Codings

|                            |                                         | Parameter coding |       |
|----------------------------|-----------------------------------------|------------------|-------|
|                            |                                         | (24)             | (25)  |
|                            | 404060001                               | ,000             | ,000  |
|                            | 404060002                               | 1,000            | ,000  |
|                            | 404310003                               | ,000             | 1,000 |
|                            | 404310004                               | ,000             | ,000  |
|                            | 502300005                               | ,000             | ,000  |
|                            | 502300006                               | ,000             | ,000  |
|                            | 502300007                               | ,000             | ,000  |
|                            | 502300214                               | ,000             | ,000  |
|                            | 502300411                               | ,000             | ,000  |
|                            | 502300415                               | ,000             | ,000  |
|                            | 502300416                               | ,000             | ,000  |
|                            | 502300811                               | ,000             | ,000  |
|                            | 502300913                               | ,000             | ,000  |
| weekday veckodag           | 1 måndag                                |                  |       |
|                            | 2 tisdag                                |                  |       |
|                            | 3 onsdag                                |                  |       |
|                            | 4 torsdag                               |                  |       |
|                            | 5 fredag                                |                  |       |
|                            | 6 lördag                                |                  |       |
|                            | 7 söndag                                |                  |       |
| season säsong/period       | 1 januari-mars                          |                  |       |
|                            | 2 april-maj                             |                  |       |
|                            | 3 juni-augusti                          |                  |       |
|                            | 4 september-oktober                     |                  |       |
|                            | 5 november-december                     |                  |       |
| sv5 kvintiler för standard | 1 tredje kvintilen                      |                  |       |
|                            | 2 första kvintilen                      |                  |       |
|                            | 3 andra kvintilen                       |                  |       |
|                            | 4 fjärde kvintilen                      |                  |       |
|                            | 5 femte kvintilen                       |                  |       |
| holiday större helg        | 1 ingen större helg                     |                  |       |
|                            | 2 större helg (påsk/midsommar/julonyår) |                  |       |

## Categorical Variables Codings

|                            |                                         | Parameter coding |       |
|----------------------------|-----------------------------------------|------------------|-------|
|                            |                                         | (26)             | (27)  |
|                            | 404060001                               | ,000             | ,000  |
|                            | 404060002                               | ,000             | ,000  |
|                            | 404310003                               | ,000             | ,000  |
|                            | 404310004                               | 1,000            | ,000  |
|                            | 502300005                               | ,000             | 1,000 |
|                            | 502300006                               | ,000             | ,000  |
|                            | 502300007                               | ,000             | ,000  |
|                            | 502300214                               | ,000             | ,000  |
|                            | 502300411                               | ,000             | ,000  |
|                            | 502300415                               | ,000             | ,000  |
|                            | 502300416                               | ,000             | ,000  |
|                            | 502300811                               | ,000             | ,000  |
|                            | 502300913                               | ,000             | ,000  |
| weekday veckodag           | 1 måndag                                |                  |       |
|                            | 2 tisdag                                |                  |       |
|                            | 3 onsdag                                |                  |       |
|                            | 4 torsdag                               |                  |       |
|                            | 5 fredag                                |                  |       |
|                            | 6 lördag                                |                  |       |
|                            | 7 söndag                                |                  |       |
| season säsong/period       | 1 januari-mars                          |                  |       |
|                            | 2 april-maj                             |                  |       |
|                            | 3 juni-augusti                          |                  |       |
|                            | 4 september-oktober                     |                  |       |
|                            | 5 november-december                     |                  |       |
| sv5 kvintiler för standard | 1 tredje kvintilen                      |                  |       |
|                            | 2 första kvintilen                      |                  |       |
|                            | 3 andra kvintilen                       |                  |       |
|                            | 4 fjärde kvintilen                      |                  |       |
|                            | 5 femte kvintilen                       |                  |       |
| holiday större helg        | 1 ingen större helg                     |                  |       |
|                            | 2 större helg (påsk/midsommar/julonyår) |                  |       |



## Categorical Variables Codings

|                            |                                         | Parameter coding |       |
|----------------------------|-----------------------------------------|------------------|-------|
|                            |                                         | (28)             | (29)  |
|                            | 404060001                               | ,000             | ,000  |
|                            | 404060002                               | ,000             | ,000  |
|                            | 404310003                               | ,000             | ,000  |
|                            | 404310004                               | ,000             | ,000  |
|                            | 502300005                               | ,000             | ,000  |
|                            | 502300006                               | 1,000            | ,000  |
|                            | 502300007                               | ,000             | 1,000 |
|                            | 502300214                               | ,000             | ,000  |
|                            | 502300411                               | ,000             | ,000  |
|                            | 502300415                               | ,000             | ,000  |
|                            | 502300416                               | ,000             | ,000  |
|                            | 502300811                               | ,000             | ,000  |
|                            | 502300913                               | ,000             | ,000  |
| weekday veckodag           | 1 måndag                                |                  |       |
|                            | 2 tisdag                                |                  |       |
|                            | 3 onsdag                                |                  |       |
|                            | 4 torsdag                               |                  |       |
|                            | 5 fredag                                |                  |       |
|                            | 6 lördag                                |                  |       |
|                            | 7 söndag                                |                  |       |
| season säsong/period       | 1 januari-mars                          |                  |       |
|                            | 2 april-maj                             |                  |       |
|                            | 3 juni-augusti                          |                  |       |
|                            | 4 september-oktober                     |                  |       |
|                            | 5 november-december                     |                  |       |
| sv5 kvintiler för standard | 1 tredje kvintilen                      |                  |       |
|                            | 2 första kvintilen                      |                  |       |
|                            | 3 andra kvintilen                       |                  |       |
|                            | 4 fjärde kvintilen                      |                  |       |
|                            | 5 femte kvintilen                       |                  |       |
| holiday större helg        | 1 ingen större helg                     |                  |       |
|                            | 2 större helg (påsk/midsommar/julonyår) |                  |       |

## Categorical Variables Codings

|                            |                                         | Parameter coding |       |
|----------------------------|-----------------------------------------|------------------|-------|
|                            |                                         | (30)             | (31)  |
|                            | 404060001                               | ,000             | ,000  |
|                            | 404060002                               | ,000             | ,000  |
|                            | 404310003                               | ,000             | ,000  |
|                            | 404310004                               | ,000             | ,000  |
|                            | 502300005                               | ,000             | ,000  |
|                            | 502300006                               | ,000             | ,000  |
|                            | 502300007                               | ,000             | ,000  |
|                            | 502300214                               | 1,000            | ,000  |
|                            | 502300411                               | ,000             | 1,000 |
|                            | 502300415                               | ,000             | ,000  |
|                            | 502300416                               | ,000             | ,000  |
|                            | 502300811                               | ,000             | ,000  |
|                            | 502300913                               | ,000             | ,000  |
| weekday veckodag           | 1 måndag                                |                  |       |
|                            | 2 tisdag                                |                  |       |
|                            | 3 onsdag                                |                  |       |
|                            | 4 torsdag                               |                  |       |
|                            | 5 fredag                                |                  |       |
|                            | 6 lördag                                |                  |       |
|                            | 7 söndag                                |                  |       |
| season säsong/period       | 1 januari-mars                          |                  |       |
|                            | 2 april-maj                             |                  |       |
|                            | 3 juni-augusti                          |                  |       |
|                            | 4 september-oktober                     |                  |       |
|                            | 5 november-december                     |                  |       |
| sv5 kvintiler för standard | 1 tredje kvintilen                      |                  |       |
|                            | 2 första kvintilen                      |                  |       |
|                            | 3 andra kvintilen                       |                  |       |
|                            | 4 fjärde kvintilen                      |                  |       |
|                            | 5 femte kvintilen                       |                  |       |
| holiday större helg        | 1 ingen större helg                     |                  |       |
|                            | 2 större helg (påsk/midsommar/julonyår) |                  |       |

## Categorical Variables Codings

|                            |                                         | Parameter coding |       |
|----------------------------|-----------------------------------------|------------------|-------|
|                            |                                         | (32)             | (33)  |
|                            | 404060001                               | ,000             | ,000  |
|                            | 404060002                               | ,000             | ,000  |
|                            | 404310003                               | ,000             | ,000  |
|                            | 404310004                               | ,000             | ,000  |
|                            | 502300005                               | ,000             | ,000  |
|                            | 502300006                               | ,000             | ,000  |
|                            | 502300007                               | ,000             | ,000  |
|                            | 502300214                               | ,000             | ,000  |
|                            | 502300411                               | ,000             | ,000  |
|                            | 502300415                               | 1,000            | ,000  |
|                            | 502300416                               | ,000             | 1,000 |
|                            | 502300811                               | ,000             | ,000  |
|                            | 502300913                               | ,000             | ,000  |
| weekday veckodag           | 1 måndag                                |                  |       |
|                            | 2 tisdag                                |                  |       |
|                            | 3 onsdag                                |                  |       |
|                            | 4 torsdag                               |                  |       |
|                            | 5 fredag                                |                  |       |
|                            | 6 lördag                                |                  |       |
|                            | 7 söndag                                |                  |       |
| season säsong/period       | 1 januari-mars                          |                  |       |
|                            | 2 april-maj                             |                  |       |
|                            | 3 juni-augusti                          |                  |       |
|                            | 4 september-oktober                     |                  |       |
|                            | 5 november-december                     |                  |       |
| sv5 kvintiler för standard | 1 tredje kvintilen                      |                  |       |
|                            | 2 första kvintilen                      |                  |       |
|                            | 3 andra kvintilen                       |                  |       |
|                            | 4 fjärde kvintilen                      |                  |       |
|                            | 5 femte kvintilen                       |                  |       |
| holiday större helg        | 1 ingen större helg                     |                  |       |
|                            | 2 större helg (påsk/midsommar/julonyår) |                  |       |

## Categorical Variables Codings

|                            |                                         | Parameter coding |       |
|----------------------------|-----------------------------------------|------------------|-------|
|                            |                                         | (34)             | (35)  |
|                            | 404060001                               | ,000             | ,000  |
|                            | 404060002                               | ,000             | ,000  |
|                            | 404310003                               | ,000             | ,000  |
|                            | 404310004                               | ,000             | ,000  |
|                            | 502300005                               | ,000             | ,000  |
|                            | 502300006                               | ,000             | ,000  |
|                            | 502300007                               | ,000             | ,000  |
|                            | 502300214                               | ,000             | ,000  |
|                            | 502300411                               | ,000             | ,000  |
|                            | 502300415                               | ,000             | ,000  |
|                            | 502300416                               | ,000             | ,000  |
|                            | 502300811                               | 1,000            | ,000  |
|                            | 502300913                               | ,000             | 1,000 |
| weekday veckodag           | 1 måndag                                |                  |       |
|                            | 2 tisdag                                |                  |       |
|                            | 3 onsdag                                |                  |       |
|                            | 4 torsdag                               |                  |       |
|                            | 5 fredag                                |                  |       |
|                            | 6 lördag                                |                  |       |
|                            | 7 söndag                                |                  |       |
| season säsong/period       | 1 januari-mars                          |                  |       |
|                            | 2 april-maj                             |                  |       |
|                            | 3 juni-augusti                          |                  |       |
|                            | 4 september-oktober                     |                  |       |
|                            | 5 november-december                     |                  |       |
| sv5 kvintiler för standard | 1 tredje kvintilen                      |                  |       |
|                            | 2 första kvintilen                      |                  |       |
|                            | 3 andra kvintilen                       |                  |       |
|                            | 4 fjärde kvintilen                      |                  |       |
|                            | 5 femte kvintilen                       |                  |       |
| holiday större helg        | 1 ingen större helg                     |                  |       |
|                            | 2 större helg (påsk/midsommar/julonyår) |                  |       |

## Block 0: Beginning Block

**Classification Table<sup>a,b</sup>**

| Observed           |                                |                           | Predicted                      |                      |
|--------------------|--------------------------------|---------------------------|--------------------------------|----------------------|
|                    |                                |                           | handlt1 händelse larger than 1 |                      |
|                    |                                |                           | 0 ingen eller en händelse      | 1 mer än en händelse |
| Step 0             | handlt1 händelse larger than 1 | 0 ingen eller en händelse | 12229                          | 0                    |
|                    |                                | 1 mer än en händelse      | 246                            | 0                    |
| Overall Percentage |                                |                           |                                |                      |

**Classification Table<sup>a,b</sup>**

| Observed           |                                |                           | Predicted          |
|--------------------|--------------------------------|---------------------------|--------------------|
|                    |                                |                           | Percentage Correct |
| Step 0             | handlt1 händelse larger than 1 | 0 ingen eller en händelse | 100,0              |
|                    |                                | 1 mer än en händelse      | ,0                 |
| Overall Percentage |                                |                           | 98,0               |

a. Constant is included in the model.

b. The cut value is ,500

**Variables in the Equation**

|                 | B      | S.E. | Wald     | df | Sig. | Exp(B) |
|-----------------|--------|------|----------|----|------|--------|
| Step 0 Constant | -3,906 | ,064 | 3679,612 | 1  | ,000 | ,020   |

## Variables not in the Equation

|        |           |            | Score   | df | Sig. |
|--------|-----------|------------|---------|----|------|
| Step 0 | Variables | sv5        | 3,960   | 4  | ,411 |
|        |           | sv5(1)     | 3,644   | 1  | ,056 |
|        |           | sv5(2)     | ,376    | 1  | ,540 |
|        |           | sv5(3)     | ,265    | 1  | ,607 |
|        |           | sv5(4)     | ,067    | 1  | ,796 |
|        |           | VASTY2     | 211,294 | 35 | ,000 |
|        |           | VASTY2(1)  | ,109    | 1  | ,741 |
|        |           | VASTY2(2)  | 2,111   | 1  | ,146 |
|        |           | VASTY2(3)  | 5,608   | 1  | ,018 |
|        |           | VASTY2(4)  | ,094    | 1  | ,759 |
|        |           | VASTY2(5)  | 1,981   | 1  | ,159 |
|        |           | VASTY2(6)  | 7,542   | 1  | ,006 |
|        |           | VASTY2(7)  | 3,478   | 1  | ,062 |
|        |           | VASTY2(8)  | ,006    | 1  | ,940 |
|        |           | VASTY2(9)  | ,082    | 1  | ,775 |
|        |           | VASTY2(10) | 36,459  | 1  | ,000 |
|        |           | VASTY2(11) | 27,814  | 1  | ,000 |
|        |           | VASTY2(12) | 2,573   | 1  | ,109 |
|        |           | VASTY2(13) | ,705    | 1  | ,401 |
|        |           | VASTY2(14) | ,209    | 1  | ,647 |
|        |           | VASTY2(15) | ,209    | 1  | ,647 |
|        |           | VASTY2(16) | ,071    | 1  | ,789 |
|        |           | VASTY2(17) | 7,564   | 1  | ,006 |
|        |           | VASTY2(18) | 7,500   | 1  | ,006 |
|        |           | VASTY2(19) | 5,608   | 1  | ,018 |
|        |           | VASTY2(20) | 1,471   | 1  | ,225 |
|        |           | VASTY2(21) | 2,573   | 1  | ,109 |
|        |           | VASTY2(22) | ,474    | 1  | ,491 |
|        |           | VASTY2(23) | 41,219  | 1  | ,000 |
|        |           | VASTY2(24) | 20,216  | 1  | ,000 |
|        |           | VASTY2(25) | ,290    | 1  | ,590 |
|        |           | VASTY2(26) | ,550    | 1  | ,458 |
|        |           | VASTY2(27) | 5,629   | 1  | ,018 |
|        |           | VASTY2(28) | 2,766   | 1  | ,096 |
|        |           | VASTY2(29) | 7,585   | 1  | ,006 |
|        |           | VASTY2(30) | ,089    | 1  | ,765 |
|        |           | VASTY2(31) | 8,820   | 1  | ,003 |
|        |           | VASTY2(32) | ,652    | 1  | ,419 |
|        |           | VASTY2(33) | 1,464   | 1  | ,226 |
|        |           | VASTY2(34) | 5,587   | 1  | ,018 |
|        |           | VASTY2(35) | 7,764   | 1  | ,005 |
|        |           | weekday    | 3,270   | 6  | ,774 |
|        |           | weekday(1) | ,002    | 1  | ,961 |

## Variables not in the Equation

|                    | Score   | df | Sig. |
|--------------------|---------|----|------|
| weekday(2)         | ,075    | 1  | ,784 |
| weekday(3)         | ,720    | 1  | ,396 |
| weekday(4)         | ,019    | 1  | ,892 |
| weekday(5)         | 2,336   | 1  | ,126 |
| weekday(6)         | ,004    | 1  | ,951 |
| holiday(1)         | 3,138   | 1  | ,076 |
| season             | 6,828   | 4  | ,145 |
| season(1)          | ,483    | 1  | ,487 |
| season(2)          | 3,014   | 1  | ,083 |
| season(3)          | 4,003   | 1  | ,045 |
| season(4)          | ,934    | 1  | ,334 |
| Overall Statistics | 225,909 | 50 | ,000 |

## Block 1: Method = Enter

## Omnibus Tests of Model Coefficients

|             | Chi-square | df | Sig. |
|-------------|------------|----|------|
| Step 1 Step | 224,307    | 50 | ,000 |
| Block       | 224,307    | 50 | ,000 |
| Model       | 224,307    | 50 | ,000 |

## Model Summary

| Step | -2 Log likelihood     | Cox & Snell R Square | Nagelkerke R Square |
|------|-----------------------|----------------------|---------------------|
| 1    | 2194,476 <sup>a</sup> | ,018                 | ,101                |

a. Estimation terminated at iteration number 20 because maximum iterations has been reached. Final solution cannot be found.

Classification Table<sup>a</sup>

| Observed           |                               | Predicted                     |                           |
|--------------------|-------------------------------|-------------------------------|---------------------------|
|                    |                               | handt1 händelse larger than 1 | 0 ingen eller en händelse |
| Step 1             | handt1 händelse larger than 1 | 12229                         | 0                         |
|                    | 0 ingen eller en händelse     | 246                           | 0                         |
| Overall Percentage |                               |                               |                           |

Classification Table<sup>a</sup>

| Observed           |                               |                           | Predicted          |
|--------------------|-------------------------------|---------------------------|--------------------|
|                    |                               |                           | Percentage Correct |
| Step 1             | handt1 händelse larger than 1 | 0 ingen eller en händelse | 100,0              |
|                    |                               | 1 mer än en händelse      | ,0                 |
| Overall Percentage |                               |                           | 98,0               |

a. The cut value is ,500

Variables in the Equation

|                         | B       | S.E.     | Wald    | df | Sig. | Exp(B) |
|-------------------------|---------|----------|---------|----|------|--------|
| Step 1 <sup>a</sup> sv5 |         |          | 2,348   | 4  | ,672 |        |
| sv5(1)                  | -,043   | ,232     | ,035    | 1  | ,852 | ,958   |
| sv5(2)                  | ,042    | ,231     | ,034    | 1  | ,854 | 1,043  |
| sv5(3)                  | -,047   | ,218     | ,046    | 1  | ,830 | ,954   |
| sv5(4)                  | ,260    | ,236     | 1,209   | 1  | ,272 | 1,297  |
| VASTY2                  |         |          | 118,861 | 35 | ,000 |        |
| VASTY2(1)               | ,432    | ,577     | ,560    | 1  | ,454 | 1,541  |
| VASTY2(2)               | ,666    | ,556     | 1,435   | 1  | ,231 | 1,947  |
| VASTY2(3)               | -1,616  | 1,098    | 2,164   | 1  | ,141 | ,199   |
| VASTY2(4)               | ,481    | ,576     | ,698    | 1  | ,403 | 1,618  |
| VASTY2(5)               | -,427   | ,737     | ,335    | 1  | ,563 | ,653   |
| VASTY2(6)               | -17,125 | 2096,686 | ,000    | 1  | ,993 | ,000   |
| VASTY2(7)               | ,921    | ,538     | 2,932   | 1  | ,087 | 2,513  |
| VASTY2(8)               | ,345    | ,593     | ,340    | 1  | ,560 | 1,412  |
| VASTY2(9)               | ,246    | ,611     | ,163    | 1  | ,687 | 1,279  |
| VASTY2(10)              | 1,415   | ,516     | 7,527   | 1  | ,006 | 4,117  |
| VASTY2(11)              | 1,474   | ,504     | 8,557   | 1  | ,003 | 4,366  |
| VASTY2(12)              | -,625   | ,740     | ,712    | 1  | ,399 | ,535   |
| VASTY2(13)              | -,183   | ,653     | ,078    | 1  | ,780 | ,833   |
| VASTY2(14)              | ,091    | ,615     | ,022    | 1  | ,882 | 1,096  |
| VASTY2(15)              | ,044    | ,621     | ,005    | 1  | ,943 | 1,045  |
| VASTY2(16)              | ,029    | ,741     | ,002    | 1  | ,969 | 1,029  |
| VASTY2(17)              | -16,926 | 2093,759 | ,000    | 1  | ,994 | ,000   |
| VASTY2(18)              | -16,872 | 2104,121 | ,000    | 1  | ,994 | ,000   |
| VASTY2(19)              | -1,572  | 1,110    | 2,004   | 1  | ,157 | ,208   |
| VASTY2(20)              | -,489   | ,741     | ,436    | 1  | ,509 | ,613   |
| VASTY2(21)              | -,506   | ,735     | ,474    | 1  | ,491 | ,603   |
| VASTY2(22)              | ,592    | ,563     | 1,105   | 1  | ,293 | 1,807  |
| VASTY2(23)              | 1,598   | ,499     | 10,280  | 1  | ,001 | 4,945  |
| VASTY2(24)              | 1,287   | ,511     | 6,341   | 1  | ,012 | 3,621  |
| VASTY2(25)              | ,511    | ,594     | ,740    | 1  | ,390 | 1,666  |



## Variables in the Equation

|                     |            | 95% C.I. for EXP(B) |        |
|---------------------|------------|---------------------|--------|
|                     |            | Lower               | Upper  |
| Step 1 <sup>a</sup> | sv5        |                     |        |
|                     | sv5(1)     | ,608                | 1,508  |
|                     | sv5(2)     | ,664                | 1,640  |
|                     | sv5(3)     | ,623                | 1,462  |
|                     | sv5(4)     | ,816                | 2,061  |
|                     | VASTY2     |                     |        |
|                     | VASTY2(1)  | ,497                | 4,779  |
|                     | VASTY2(2)  | ,654                | 5,792  |
|                     | VASTY2(3)  | ,023                | 1,711  |
|                     | VASTY2(4)  | ,523                | 5,000  |
|                     | VASTY2(5)  | ,154                | 2,769  |
|                     | VASTY2(6)  | ,000                | .      |
|                     | VASTY2(7)  | ,875                | 7,215  |
|                     | VASTY2(8)  | ,442                | 4,512  |
|                     | VASTY2(9)  | ,386                | 4,235  |
|                     | VASTY2(10) | 1,498               | 11,313 |
|                     | VASTY2(11) | 1,626               | 11,723 |
|                     | VASTY2(12) | ,125                | 2,285  |
|                     | VASTY2(13) | ,232                | 2,993  |
|                     | VASTY2(14) | ,328                | 3,660  |
|                     | VASTY2(15) | ,310                | 3,528  |
|                     | VASTY2(16) | ,241                | 4,399  |
|                     | VASTY2(17) | ,000                | .      |
|                     | VASTY2(18) | ,000                | .      |
|                     | VASTY2(19) | ,024                | 1,830  |
|                     | VASTY2(20) | ,144                | 2,618  |
|                     | VASTY2(21) | ,143                | 2,546  |
|                     | VASTY2(22) | ,599                | 5,451  |
|                     | VASTY2(23) | 1,861               | 13,138 |
|                     | VASTY2(24) | 1,330               | 9,859  |
|                     | VASTY2(25) | ,521                | 5,333  |

review only

## Variables in the Equation

|            | B       | S.E.     | Wald   | df | Sig. | Exp(B) |
|------------|---------|----------|--------|----|------|--------|
| VASTY2(26) | -,083   | ,677     | ,015   | 1  | ,903 | ,921   |
| VASTY2(27) | -1,763  | 1,102    | 2,559  | 1  | ,110 | ,172   |
| VASTY2(28) | -1,444  | 1,112    | 1,685  | 1  | ,194 | ,236   |
| VASTY2(29) | -17,199 | 2095,974 | ,000   | 1  | ,993 | ,000   |
| VASTY2(30) | ,457    | ,577     | ,625   | 1  | ,429 | 1,579  |
| VASTY2(31) | 1,132   | ,538     | 4,424  | 1  | ,035 | 3,102  |
| VASTY2(32) | ,030    | ,657     | ,002   | 1  | ,964 | 1,030  |
| VASTY2(33) | -,197   | ,695     | ,081   | 1  | ,776 | ,821   |
| VASTY2(34) | -1,656  | 1,098    | 2,273  | 1  | ,132 | ,191   |
| VASTY2(35) | 1,055   | ,534     | 3,895  | 1  | ,048 | 2,871  |
| weekday    |         |          | 2,898  | 6  | ,822 |        |
| weekday(1) | -,108   | ,235     | ,213   | 1  | ,644 | ,897   |
| weekday(2) | -,168   | ,238     | ,498   | 1  | ,480 | ,845   |
| weekday(3) | ,009    | ,229     | ,001   | 1  | ,970 | 1,009  |
| weekday(4) | -,071   | ,236     | ,091   | 1  | ,763 | ,931   |
| weekday(5) | -,374   | ,258     | 2,098  | 1  | ,147 | ,688   |
| weekday(6) | -,126   | ,239     | ,276   | 1  | ,599 | ,882   |
| holiday(1) | -,823   | ,596     | 1,910  | 1  | ,167 | ,439   |
| season     |         |          | 5,918  | 4  | ,205 |        |
| season(1)  | ,069    | ,198     | ,122   | 1  | ,727 | 1,071  |
| season(2)  | -,251   | ,200     | 1,574  | 1  | ,210 | ,778   |
| season(3)  | ,223    | ,190     | 1,385  | 1  | ,239 | 1,250  |
| season(4)  | -,111   | ,214     | ,270   | 1  | ,603 | ,895   |
| Constant   | -4,123  | ,505     | 66,525 | 1  | ,000 | ,016   |

## Variables in the Equation

|            | 95% C.I. for EXP(B) |       |
|------------|---------------------|-------|
|            | Lower               | Upper |
| VASTY2(26) | ,244                | 3,466 |
| VASTY2(27) | ,020                | 1,487 |
| VASTY2(28) | ,027                | 2,088 |
| VASTY2(29) | ,000                | .     |
| VASTY2(30) | ,509                | 4,896 |
| VASTY2(31) | 1,080               | 8,909 |
| VASTY2(32) | ,284                | 3,733 |
| VASTY2(33) | ,210                | 3,206 |
| VASTY2(34) | ,022                | 1,643 |
| VASTY2(35) | 1,007               | 8,181 |
| weekday    |                     |       |
| weekday(1) | ,567                | 1,421 |
| weekday(2) | ,530                | 1,348 |
| weekday(3) | ,644                | 1,580 |
| weekday(4) | ,587                | 1,478 |
| weekday(5) | ,415                | 1,141 |
| weekday(6) | ,552                | 1,409 |
| holiday(1) | ,137                | 1,411 |
| season     |                     |       |
| season(1)  | ,727                | 1,579 |
| season(2)  | ,526                | 1,151 |
| season(3)  | ,862                | 1,813 |
| season(4)  | ,589                | 1,360 |
| Constant   |                     |       |

a. Variable(s) entered on step 1: sv5, VASTY2, weekday, holiday, season.

```
LOGISTIC REGRESSION VARIABLES handlt1
  /METHOD=ENTER sv7 VASTY2 weekday holiday season
  /CONTRAST (sv7)=Indicator(1)
  /CONTRAST (VASTY2)=Indicator(1)
  /CONTRAST (weekday)=Indicator(1)
  /CONTRAST (holiday)=Indicator(1)
  /CONTRAST (season)=Indicator(1)
  /PRINT=CI(95)
  /CRITERIA=PIN(0.05) POUT(0.10) ITERATE(20) CUT(0.5).
```

## Logistic Regression

[DataSet6] C:\cWordjan\Rafaela\_VCS\alla\_tillsammans\abo\_bjo\_vasa\_v1.sav

### Case Processing Summary

| Unweighted Cases <sup>a</sup> |                      | N     | Percent |
|-------------------------------|----------------------|-------|---------|
| Selected Cases                | Included in Analysis | 12475 | 100,0   |
|                               | Missing Cases        | 0     | ,0      |
|                               | Total                | 12475 | 100,0   |
| Unselected Cases              |                      | 0     | ,0      |
| Total                         |                      | 12475 | 100,0   |

a. If weight is in effect, see classification table for the total number of cases.

### Dependent Variable Encoding

| Original Value            | Internal Value |
|---------------------------|----------------|
| 0 ingen eller en händelse | 0              |
| 1 mer än en händelse      | 1              |

### Categorical Variables Codings

|                           | Frequency | Parameter |
|---------------------------|-----------|-----------|
|                           |           | (1)       |
| VASTY2 (SAIR*10000)+VASTY | 365       | ,000      |
| 403073101                 | 362       | 1,000     |
| 403073102                 | 365       | ,000      |
| 403073103                 | 365       | ,000      |
| 403073202                 | 365       | ,000      |
| 403073203                 | 365       | ,000      |
| 403073204                 | 330       | ,000      |
| 403073303                 | 364       | ,000      |
| 403073651                 | 362       | ,000      |
| 403073771                 | 365       | ,000      |
| 403133102                 | 341       | ,000      |
| 403133106                 | 365       | ,000      |
| 403133107                 | 365       | ,000      |
| 403133109                 | 365       | ,000      |
| 403133202                 | 365       | ,000      |
| 403133203                 | 365       | ,000      |
| 403133204                 | 365       | ,000      |
| 403133315                 | 177       | ,000      |
| 403133322                 | 365       | ,000      |
| 403133401                 | 362       | ,000      |
| 403133402                 | 365       | ,000      |
| 403133550                 | 298       | ,000      |
| 403133772                 | 365       | ,000      |
| 403135803                 | 365       | ,000      |
| 404060001                 | 365       | ,000      |
| 404060002                 | 366       | ,000      |
| 404310003                 | 291       | ,000      |
| 404310004                 | 291       | ,000      |

**Categorical Variables Codings**

|                           |           | Parameter coding |       |
|---------------------------|-----------|------------------|-------|
|                           |           | (2)              | (3)   |
| VASTY2 (SAIR*10000)+VASTY | 403073101 | ,000             | ,000  |
|                           | 403073102 | ,000             | ,000  |
|                           | 403073103 | 1,000            | ,000  |
|                           | 403073202 | ,000             | 1,000 |
|                           | 403073203 | ,000             | ,000  |
|                           | 403073204 | ,000             | ,000  |
|                           | 403073303 | ,000             | ,000  |
|                           | 403073651 | ,000             | ,000  |
|                           | 403073771 | ,000             | ,000  |
|                           | 403133102 | ,000             | ,000  |
|                           | 403133106 | ,000             | ,000  |
|                           | 403133107 | ,000             | ,000  |
|                           | 403133109 | ,000             | ,000  |
|                           | 403133202 | ,000             | ,000  |
|                           | 403133203 | ,000             | ,000  |
|                           | 403133204 | ,000             | ,000  |
|                           | 403133315 | ,000             | ,000  |
|                           | 403133322 | ,000             | ,000  |
|                           | 403133401 | ,000             | ,000  |
|                           | 403133402 | ,000             | ,000  |
|                           | 403133550 | ,000             | ,000  |
|                           | 403133772 | ,000             | ,000  |
|                           | 403135803 | ,000             | ,000  |
|                           | 404060001 | ,000             | ,000  |
|                           | 404060002 | ,000             | ,000  |
|                           | 404310003 | ,000             | ,000  |
|                           | 404310004 | ,000             | ,000  |

BMJ

## Categorical Variables Codings

|                           |           | Parameter coding |       |
|---------------------------|-----------|------------------|-------|
|                           |           | (4)              | (5)   |
| VASTY2 (SAIR*10000)+VASTY | 403073101 | ,000             | ,000  |
|                           | 403073102 | ,000             | ,000  |
|                           | 403073103 | ,000             | ,000  |
|                           | 403073202 | ,000             | ,000  |
|                           | 403073203 | 1,000            | ,000  |
|                           | 403073204 | ,000             | 1,000 |
|                           | 403073303 | ,000             | ,000  |
|                           | 403073651 | ,000             | ,000  |
|                           | 403073771 | ,000             | ,000  |
|                           | 403133102 | ,000             | ,000  |
|                           | 403133106 | ,000             | ,000  |
|                           | 403133107 | ,000             | ,000  |
|                           | 403133109 | ,000             | ,000  |
|                           | 403133202 | ,000             | ,000  |
|                           | 403133203 | ,000             | ,000  |
|                           | 403133204 | ,000             | ,000  |
|                           | 403133315 | ,000             | ,000  |
|                           | 403133322 | ,000             | ,000  |
|                           | 403133401 | ,000             | ,000  |
|                           | 403133402 | ,000             | ,000  |
|                           | 403133550 | ,000             | ,000  |
|                           | 403133772 | ,000             | ,000  |
|                           | 403135803 | ,000             | ,000  |
|                           | 404060001 | ,000             | ,000  |
|                           | 404060002 | ,000             | ,000  |
|                           | 404310003 | ,000             | ,000  |
|                           | 404310004 | ,000             | ,000  |

## Categorical Variables Codings

|                           |           | Parameter coding |       |
|---------------------------|-----------|------------------|-------|
|                           |           | (6)              | (7)   |
| VASTY2 (SAIR*10000)+VASTY | 403073101 | ,000             | ,000  |
|                           | 403073102 | ,000             | ,000  |
|                           | 403073103 | ,000             | ,000  |
|                           | 403073202 | ,000             | ,000  |
|                           | 403073203 | ,000             | ,000  |
|                           | 403073204 | ,000             | ,000  |
|                           | 403073303 | 1,000            | ,000  |
|                           | 403073651 | ,000             | 1,000 |
|                           | 403073771 | ,000             | ,000  |
|                           | 403133102 | ,000             | ,000  |
|                           | 403133106 | ,000             | ,000  |
|                           | 403133107 | ,000             | ,000  |
|                           | 403133109 | ,000             | ,000  |
|                           | 403133202 | ,000             | ,000  |
|                           | 403133203 | ,000             | ,000  |
|                           | 403133204 | ,000             | ,000  |
|                           | 403133315 | ,000             | ,000  |
|                           | 403133322 | ,000             | ,000  |
|                           | 403133401 | ,000             | ,000  |
|                           | 403133402 | ,000             | ,000  |
|                           | 403133550 | ,000             | ,000  |
|                           | 403133772 | ,000             | ,000  |
|                           | 403135803 | ,000             | ,000  |
|                           | 404060001 | ,000             | ,000  |
|                           | 404060002 | ,000             | ,000  |
|                           | 404310003 | ,000             | ,000  |
|                           | 404310004 | ,000             | ,000  |

## Categorical Variables Codings

|                           |           | Parameter coding |       |
|---------------------------|-----------|------------------|-------|
|                           |           | (8)              | (9)   |
| VASTY2 (SAIR*10000)+VASTY | 403073101 | ,000             | ,000  |
|                           | 403073102 | ,000             | ,000  |
|                           | 403073103 | ,000             | ,000  |
|                           | 403073202 | ,000             | ,000  |
|                           | 403073203 | ,000             | ,000  |
|                           | 403073204 | ,000             | ,000  |
|                           | 403073303 | ,000             | ,000  |
|                           | 403073651 | ,000             | ,000  |
|                           | 403073771 | 1,000            | ,000  |
|                           | 403133102 | ,000             | 1,000 |
|                           | 403133106 | ,000             | ,000  |
|                           | 403133107 | ,000             | ,000  |
|                           | 403133109 | ,000             | ,000  |
|                           | 403133202 | ,000             | ,000  |
|                           | 403133203 | ,000             | ,000  |
|                           | 403133204 | ,000             | ,000  |
|                           | 403133315 | ,000             | ,000  |
|                           | 403133322 | ,000             | ,000  |
|                           | 403133401 | ,000             | ,000  |
|                           | 403133402 | ,000             | ,000  |
|                           | 403133550 | ,000             | ,000  |
|                           | 403133772 | ,000             | ,000  |
|                           | 403135803 | ,000             | ,000  |
|                           | 404060001 | ,000             | ,000  |
|                           | 404060002 | ,000             | ,000  |
|                           | 404310003 | ,000             | ,000  |
|                           | 404310004 | ,000             | ,000  |



1  
2  
3  
4  
5  
6  
7  
8  
9  
10  
11  
12  
13  
14  
15  
16  
17  
18  
19  
20  
21  
22  
23  
24  
25  
26  
27  
28  
29  
30  
31  
32  
33  
34  
35  
36  
37  
38  
39  
40  
41  
42  
43  
44  
45  
46  
47  
48  
49  
50  
51  
52  
53  
54  
55  
56  
57  
58  
59  
60

**Categorical Variables Codings**

|                           |           | Parameter coding |       |
|---------------------------|-----------|------------------|-------|
|                           |           | (10)             | (11)  |
| VASTY2 (SAIR*10000)+VASTY | 403073101 | ,000             | ,000  |
|                           | 403073102 | ,000             | ,000  |
|                           | 403073103 | ,000             | ,000  |
|                           | 403073202 | ,000             | ,000  |
|                           | 403073203 | ,000             | ,000  |
|                           | 403073204 | ,000             | ,000  |
|                           | 403073303 | ,000             | ,000  |
|                           | 403073651 | ,000             | ,000  |
|                           | 403073771 | ,000             | ,000  |
|                           | 403133102 | ,000             | ,000  |
|                           | 403133106 | 1,000            | ,000  |
|                           | 403133107 | ,000             | 1,000 |
|                           | 403133109 | ,000             | ,000  |
|                           | 403133202 | ,000             | ,000  |
|                           | 403133203 | ,000             | ,000  |
|                           | 403133204 | ,000             | ,000  |
|                           | 403133315 | ,000             | ,000  |
|                           | 403133322 | ,000             | ,000  |
|                           | 403133401 | ,000             | ,000  |
|                           | 403133402 | ,000             | ,000  |
|                           | 403133550 | ,000             | ,000  |
|                           | 403133772 | ,000             | ,000  |
|                           | 403135803 | ,000             | ,000  |
|                           | 404060001 | ,000             | ,000  |
|                           | 404060002 | ,000             | ,000  |
|                           | 404310003 | ,000             | ,000  |
|                           | 404310004 | ,000             | ,000  |

## Categorical Variables Codings

|                           |           | Parameter coding |       |
|---------------------------|-----------|------------------|-------|
|                           |           | (12)             | (13)  |
| VASTY2 (SAIR*10000)+VASTY | 403073101 | ,000             | ,000  |
|                           | 403073102 | ,000             | ,000  |
|                           | 403073103 | ,000             | ,000  |
|                           | 403073202 | ,000             | ,000  |
|                           | 403073203 | ,000             | ,000  |
|                           | 403073204 | ,000             | ,000  |
|                           | 403073303 | ,000             | ,000  |
|                           | 403073651 | ,000             | ,000  |
|                           | 403073771 | ,000             | ,000  |
|                           | 403133102 | ,000             | ,000  |
|                           | 403133106 | ,000             | ,000  |
|                           | 403133107 | ,000             | ,000  |
|                           | 403133109 | 1,000            | ,000  |
|                           | 403133202 | ,000             | 1,000 |
|                           | 403133203 | ,000             | ,000  |
|                           | 403133204 | ,000             | ,000  |
|                           | 403133315 | ,000             | ,000  |
|                           | 403133322 | ,000             | ,000  |
|                           | 403133401 | ,000             | ,000  |
|                           | 403133402 | ,000             | ,000  |
|                           | 403133550 | ,000             | ,000  |
|                           | 403133772 | ,000             | ,000  |
|                           | 403135803 | ,000             | ,000  |
|                           | 404060001 | ,000             | ,000  |
|                           | 404060002 | ,000             | ,000  |
|                           | 404310003 | ,000             | ,000  |
|                           | 404310004 | ,000             | ,000  |

Categorical Variables Codings

|                           |           | Parameter coding |       |
|---------------------------|-----------|------------------|-------|
|                           |           | (14)             | (15)  |
| VASTY2 (SAIR*10000)+VASTY | 403073101 | ,000             | ,000  |
|                           | 403073102 | ,000             | ,000  |
|                           | 403073103 | ,000             | ,000  |
|                           | 403073202 | ,000             | ,000  |
|                           | 403073203 | ,000             | ,000  |
|                           | 403073204 | ,000             | ,000  |
|                           | 403073303 | ,000             | ,000  |
|                           | 403073651 | ,000             | ,000  |
|                           | 403073771 | ,000             | ,000  |
|                           | 403133102 | ,000             | ,000  |
|                           | 403133106 | ,000             | ,000  |
|                           | 403133107 | ,000             | ,000  |
|                           | 403133109 | ,000             | ,000  |
|                           | 403133202 | ,000             | ,000  |
|                           | 403133203 | 1,000            | ,000  |
|                           | 403133204 | ,000             | 1,000 |
|                           | 403133315 | ,000             | ,000  |
|                           | 403133322 | ,000             | ,000  |
|                           | 403133401 | ,000             | ,000  |
|                           | 403133402 | ,000             | ,000  |
|                           | 403133550 | ,000             | ,000  |
|                           | 403133772 | ,000             | ,000  |
|                           | 403135803 | ,000             | ,000  |
|                           | 404060001 | ,000             | ,000  |
|                           | 404060002 | ,000             | ,000  |
|                           | 404310003 | ,000             | ,000  |
|                           | 404310004 | ,000             | ,000  |

BMJ

## Categorical Variables Codings

|                           |           | Parameter coding |       |
|---------------------------|-----------|------------------|-------|
|                           |           | (16)             | (17)  |
| VASTY2 (SAIR*10000)+VASTY | 403073101 | ,000             | ,000  |
|                           | 403073102 | ,000             | ,000  |
|                           | 403073103 | ,000             | ,000  |
|                           | 403073202 | ,000             | ,000  |
|                           | 403073203 | ,000             | ,000  |
|                           | 403073204 | ,000             | ,000  |
|                           | 403073303 | ,000             | ,000  |
|                           | 403073651 | ,000             | ,000  |
|                           | 403073771 | ,000             | ,000  |
|                           | 403133102 | ,000             | ,000  |
|                           | 403133106 | ,000             | ,000  |
|                           | 403133107 | ,000             | ,000  |
|                           | 403133109 | ,000             | ,000  |
|                           | 403133202 | ,000             | ,000  |
|                           | 403133203 | ,000             | ,000  |
|                           | 403133204 | ,000             | ,000  |
|                           | 403133315 | 1,000            | ,000  |
|                           | 403133322 | ,000             | 1,000 |
|                           | 403133401 | ,000             | ,000  |
|                           | 403133402 | ,000             | ,000  |
|                           | 403133550 | ,000             | ,000  |
|                           | 403133772 | ,000             | ,000  |
|                           | 403135803 | ,000             | ,000  |
|                           | 404060001 | ,000             | ,000  |
|                           | 404060002 | ,000             | ,000  |
|                           | 404310003 | ,000             | ,000  |
|                           | 404310004 | ,000             | ,000  |

1  
2  
3  
4  
5  
6  
7  
8  
9  
10  
11  
12  
13  
14  
15  
16  
17  
18  
19  
20  
21  
22  
23  
24  
25  
26  
27  
28  
29  
30  
31  
32  
33  
34  
35  
36  
37  
38  
39  
40  
41  
42  
43  
44  
45  
46  
47  
48  
49  
50  
51  
52  
53  
54  
55  
56  
57  
58  
59  
60

**Categorical Variables Codings**

|                           |           | Parameter coding |       |
|---------------------------|-----------|------------------|-------|
|                           |           | (18)             | (19)  |
| VASTY2 (SAIR*10000)+VASTY | 403073101 | ,000             | ,000  |
|                           | 403073102 | ,000             | ,000  |
|                           | 403073103 | ,000             | ,000  |
|                           | 403073202 | ,000             | ,000  |
|                           | 403073203 | ,000             | ,000  |
|                           | 403073204 | ,000             | ,000  |
|                           | 403073303 | ,000             | ,000  |
|                           | 403073651 | ,000             | ,000  |
|                           | 403073771 | ,000             | ,000  |
|                           | 403133102 | ,000             | ,000  |
|                           | 403133106 | ,000             | ,000  |
|                           | 403133107 | ,000             | ,000  |
|                           | 403133109 | ,000             | ,000  |
|                           | 403133202 | ,000             | ,000  |
|                           | 403133203 | ,000             | ,000  |
|                           | 403133204 | ,000             | ,000  |
|                           | 403133315 | ,000             | ,000  |
|                           | 403133322 | ,000             | ,000  |
|                           | 403133401 | 1,000            | ,000  |
|                           | 403133402 | ,000             | 1,000 |
|                           | 403133550 | ,000             | ,000  |
|                           | 403133772 | ,000             | ,000  |
|                           | 403135803 | ,000             | ,000  |
|                           | 404060001 | ,000             | ,000  |
|                           | 404060002 | ,000             | ,000  |
|                           | 404310003 | ,000             | ,000  |
|                           | 404310004 | ,000             | ,000  |

## Categorical Variables Codings

|                           |           | Parameter coding |       |
|---------------------------|-----------|------------------|-------|
|                           |           | (20)             | (21)  |
| VASTY2 (SAIR*10000)+VASTY | 403073101 | ,000             | ,000  |
|                           | 403073102 | ,000             | ,000  |
|                           | 403073103 | ,000             | ,000  |
|                           | 403073202 | ,000             | ,000  |
|                           | 403073203 | ,000             | ,000  |
|                           | 403073204 | ,000             | ,000  |
|                           | 403073303 | ,000             | ,000  |
|                           | 403073651 | ,000             | ,000  |
|                           | 403073771 | ,000             | ,000  |
|                           | 403133102 | ,000             | ,000  |
|                           | 403133106 | ,000             | ,000  |
|                           | 403133107 | ,000             | ,000  |
|                           | 403133109 | ,000             | ,000  |
|                           | 403133202 | ,000             | ,000  |
|                           | 403133203 | ,000             | ,000  |
|                           | 403133204 | ,000             | ,000  |
|                           | 403133315 | ,000             | ,000  |
|                           | 403133322 | ,000             | ,000  |
|                           | 403133401 | ,000             | ,000  |
|                           | 403133402 | ,000             | ,000  |
|                           | 403133550 | 1,000            | ,000  |
|                           | 403133772 | ,000             | 1,000 |
|                           | 403135803 | ,000             | ,000  |
|                           | 404060001 | ,000             | ,000  |
|                           | 404060002 | ,000             | ,000  |
|                           | 404310003 | ,000             | ,000  |
|                           | 404310004 | ,000             | ,000  |

## Categorical Variables Codings

|                           |           | Parameter coding |       |
|---------------------------|-----------|------------------|-------|
|                           |           | (22)             | (23)  |
| VASTY2 (SAIR*10000)+VASTY | 403073101 | ,000             | ,000  |
|                           | 403073102 | ,000             | ,000  |
|                           | 403073103 | ,000             | ,000  |
|                           | 403073202 | ,000             | ,000  |
|                           | 403073203 | ,000             | ,000  |
|                           | 403073204 | ,000             | ,000  |
|                           | 403073303 | ,000             | ,000  |
|                           | 403073651 | ,000             | ,000  |
|                           | 403073771 | ,000             | ,000  |
|                           | 403133102 | ,000             | ,000  |
|                           | 403133106 | ,000             | ,000  |
|                           | 403133107 | ,000             | ,000  |
|                           | 403133109 | ,000             | ,000  |
|                           | 403133202 | ,000             | ,000  |
|                           | 403133203 | ,000             | ,000  |
|                           | 403133204 | ,000             | ,000  |
|                           | 403133315 | ,000             | ,000  |
|                           | 403133322 | ,000             | ,000  |
|                           | 403133401 | ,000             | ,000  |
|                           | 403133402 | ,000             | ,000  |
|                           | 403133550 | ,000             | ,000  |
|                           | 403133772 | ,000             | ,000  |
|                           | 403135803 | 1,000            | ,000  |
|                           | 404060001 | ,000             | 1,000 |
|                           | 404060002 | ,000             | ,000  |
|                           | 404310003 | ,000             | ,000  |
|                           | 404310004 | ,000             | ,000  |

## Categorical Variables Codings

|                           |           | Parameter coding |       |
|---------------------------|-----------|------------------|-------|
|                           |           | (24)             | (25)  |
| VASTY2 (SAIR*10000)+VASTY | 403073101 | ,000             | ,000  |
|                           | 403073102 | ,000             | ,000  |
|                           | 403073103 | ,000             | ,000  |
|                           | 403073202 | ,000             | ,000  |
|                           | 403073203 | ,000             | ,000  |
|                           | 403073204 | ,000             | ,000  |
|                           | 403073303 | ,000             | ,000  |
|                           | 403073651 | ,000             | ,000  |
|                           | 403073771 | ,000             | ,000  |
|                           | 403133102 | ,000             | ,000  |
|                           | 403133106 | ,000             | ,000  |
|                           | 403133107 | ,000             | ,000  |
|                           | 403133109 | ,000             | ,000  |
|                           | 403133202 | ,000             | ,000  |
|                           | 403133203 | ,000             | ,000  |
|                           | 403133204 | ,000             | ,000  |
|                           | 403133315 | ,000             | ,000  |
|                           | 403133322 | ,000             | ,000  |
|                           | 403133401 | ,000             | ,000  |
|                           | 403133402 | ,000             | ,000  |
|                           | 403133550 | ,000             | ,000  |
|                           | 403133772 | ,000             | ,000  |
|                           | 403135803 | ,000             | ,000  |
|                           | 404060001 | ,000             | ,000  |
|                           | 404060002 | 1,000            | ,000  |
|                           | 404310003 | ,000             | 1,000 |
|                           | 404310004 | ,000             | ,000  |



1  
2  
3  
4  
5  
6  
7  
8  
9  
10  
11  
12  
13  
14  
15  
16  
17  
18  
19  
20  
21  
22  
23  
24  
25  
26  
27  
28  
29  
30  
31  
32  
33  
34  
35  
36  
37  
38  
39  
40  
41  
42  
43  
44  
45  
46  
47  
48  
49  
50  
51  
52  
53  
54  
55  
56  
57  
58  
59  
60

**Categorical Variables Codings**

|                           |           | Parameter coding |      |
|---------------------------|-----------|------------------|------|
|                           |           | (26)             | (27) |
| VASTY2 (SAIR*10000)+VASTY | 403073101 | ,000             | ,000 |
|                           | 403073102 | ,000             | ,000 |
|                           | 403073103 | ,000             | ,000 |
|                           | 403073202 | ,000             | ,000 |
|                           | 403073203 | ,000             | ,000 |
|                           | 403073204 | ,000             | ,000 |
|                           | 403073303 | ,000             | ,000 |
|                           | 403073651 | ,000             | ,000 |
|                           | 403073771 | ,000             | ,000 |
|                           | 403133102 | ,000             | ,000 |
|                           | 403133106 | ,000             | ,000 |
|                           | 403133107 | ,000             | ,000 |
|                           | 403133109 | ,000             | ,000 |
|                           | 403133202 | ,000             | ,000 |
|                           | 403133203 | ,000             | ,000 |
|                           | 403133204 | ,000             | ,000 |
|                           | 403133315 | ,000             | ,000 |
|                           | 403133322 | ,000             | ,000 |
|                           | 403133401 | ,000             | ,000 |
|                           | 403133402 | ,000             | ,000 |
|                           | 403133550 | ,000             | ,000 |
|                           | 403133772 | ,000             | ,000 |
|                           | 403135803 | ,000             | ,000 |
|                           | 404060001 | ,000             | ,000 |
|                           | 404060002 | ,000             | ,000 |
|                           | 404310003 | ,000             | ,000 |
|                           | 404310004 | 1,000            | ,000 |

## Categorical Variables Codings

|                           |           | Parameter coding |      |
|---------------------------|-----------|------------------|------|
|                           |           | (28)             | (29) |
| VASTY2 (SAIR*10000)+VASTY | 403073101 | ,000             | ,000 |
|                           | 403073102 | ,000             | ,000 |
|                           | 403073103 | ,000             | ,000 |
|                           | 403073202 | ,000             | ,000 |
|                           | 403073203 | ,000             | ,000 |
|                           | 403073204 | ,000             | ,000 |
|                           | 403073303 | ,000             | ,000 |
|                           | 403073651 | ,000             | ,000 |
|                           | 403073771 | ,000             | ,000 |
|                           | 403133102 | ,000             | ,000 |
|                           | 403133106 | ,000             | ,000 |
|                           | 403133107 | ,000             | ,000 |
|                           | 403133109 | ,000             | ,000 |
|                           | 403133202 | ,000             | ,000 |
|                           | 403133203 | ,000             | ,000 |
|                           | 403133204 | ,000             | ,000 |
|                           | 403133315 | ,000             | ,000 |
|                           | 403133322 | ,000             | ,000 |
|                           | 403133401 | ,000             | ,000 |
|                           | 403133402 | ,000             | ,000 |
|                           | 403133550 | ,000             | ,000 |
|                           | 403133772 | ,000             | ,000 |
|                           | 403135803 | ,000             | ,000 |
|                           | 404060001 | ,000             | ,000 |
|                           | 404060002 | ,000             | ,000 |
|                           | 404310003 | ,000             | ,000 |
|                           | 404310004 | ,000             | ,000 |

1  
2  
3  
4  
5  
6  
7  
8  
9  
10  
11  
12  
13  
14  
15  
16  
17  
18  
19  
20  
21  
22  
23  
24  
25  
26  
27  
28  
29  
30  
31  
32  
33  
34  
35  
36  
37  
38  
39  
40  
41  
42  
43  
44  
45  
46  
47  
48  
49  
50  
51  
52  
53  
54  
55  
56  
57  
58  
59  
60

**Categorical Variables Codings**

|                           |           | Parameter coding |      |
|---------------------------|-----------|------------------|------|
|                           |           | (30)             | (31) |
| VASTY2 (SAIR*10000)+VASTY | 403073101 | ,000             | ,000 |
|                           | 403073102 | ,000             | ,000 |
|                           | 403073103 | ,000             | ,000 |
|                           | 403073202 | ,000             | ,000 |
|                           | 403073203 | ,000             | ,000 |
|                           | 403073204 | ,000             | ,000 |
|                           | 403073303 | ,000             | ,000 |
|                           | 403073651 | ,000             | ,000 |
|                           | 403073771 | ,000             | ,000 |
|                           | 403133102 | ,000             | ,000 |
|                           | 403133106 | ,000             | ,000 |
|                           | 403133107 | ,000             | ,000 |
|                           | 403133109 | ,000             | ,000 |
|                           | 403133202 | ,000             | ,000 |
|                           | 403133203 | ,000             | ,000 |
|                           | 403133204 | ,000             | ,000 |
|                           | 403133315 | ,000             | ,000 |
|                           | 403133322 | ,000             | ,000 |
|                           | 403133401 | ,000             | ,000 |
|                           | 403133402 | ,000             | ,000 |
|                           | 403133550 | ,000             | ,000 |
|                           | 403133772 | ,000             | ,000 |
|                           | 403135803 | ,000             | ,000 |
|                           | 404060001 | ,000             | ,000 |
|                           | 404060002 | ,000             | ,000 |
|                           | 404310003 | ,000             | ,000 |
|                           | 404310004 | ,000             | ,000 |

## Categorical Variables Codings

|                           |           | Parameter coding |      |
|---------------------------|-----------|------------------|------|
|                           |           | (32)             | (33) |
| VASTY2 (SAIR*10000)+VASTY | 403073101 | ,000             | ,000 |
|                           | 403073102 | ,000             | ,000 |
|                           | 403073103 | ,000             | ,000 |
|                           | 403073202 | ,000             | ,000 |
|                           | 403073203 | ,000             | ,000 |
|                           | 403073204 | ,000             | ,000 |
|                           | 403073303 | ,000             | ,000 |
|                           | 403073651 | ,000             | ,000 |
|                           | 403073771 | ,000             | ,000 |
|                           | 403133102 | ,000             | ,000 |
|                           | 403133106 | ,000             | ,000 |
|                           | 403133107 | ,000             | ,000 |
|                           | 403133109 | ,000             | ,000 |
|                           | 403133202 | ,000             | ,000 |
|                           | 403133203 | ,000             | ,000 |
|                           | 403133204 | ,000             | ,000 |
|                           | 403133315 | ,000             | ,000 |
|                           | 403133322 | ,000             | ,000 |
|                           | 403133401 | ,000             | ,000 |
|                           | 403133402 | ,000             | ,000 |
|                           | 403133550 | ,000             | ,000 |
|                           | 403133772 | ,000             | ,000 |
|                           | 403135803 | ,000             | ,000 |
|                           | 404060001 | ,000             | ,000 |
|                           | 404060002 | ,000             | ,000 |
|                           | 404310003 | ,000             | ,000 |
|                           | 404310004 | ,000             | ,000 |

1  
2  
3  
4  
5  
6  
7  
8  
9  
10  
11  
12  
13  
14  
15  
16  
17  
18  
19  
20  
21  
22  
23  
24  
25  
26  
27  
28  
29  
30  
31  
32  
33  
34  
35  
36  
37  
38  
39  
40  
41  
42  
43  
44  
45  
46  
47  
48  
49  
50  
51  
52  
53  
54  
55  
56  
57  
58  
59  
60

**Categorical Variables Codings**

|                           |           | Parameter coding |      |
|---------------------------|-----------|------------------|------|
|                           |           | (34)             | (35) |
| VASTY2 (SAIR*10000)+VASTY | 403073101 | ,000             | ,000 |
|                           | 403073102 | ,000             | ,000 |
|                           | 403073103 | ,000             | ,000 |
|                           | 403073202 | ,000             | ,000 |
|                           | 403073203 | ,000             | ,000 |
|                           | 403073204 | ,000             | ,000 |
|                           | 403073303 | ,000             | ,000 |
|                           | 403073651 | ,000             | ,000 |
|                           | 403073771 | ,000             | ,000 |
|                           | 403133102 | ,000             | ,000 |
|                           | 403133106 | ,000             | ,000 |
|                           | 403133107 | ,000             | ,000 |
|                           | 403133109 | ,000             | ,000 |
|                           | 403133202 | ,000             | ,000 |
|                           | 403133203 | ,000             | ,000 |
|                           | 403133204 | ,000             | ,000 |
|                           | 403133315 | ,000             | ,000 |
|                           | 403133322 | ,000             | ,000 |
|                           | 403133401 | ,000             | ,000 |
|                           | 403133402 | ,000             | ,000 |
|                           | 403133550 | ,000             | ,000 |
|                           | 403133772 | ,000             | ,000 |
|                           | 403135803 | ,000             | ,000 |
|                           | 404060001 | ,000             | ,000 |
|                           | 404060002 | ,000             | ,000 |
|                           | 404310003 | ,000             | ,000 |
|                           | 404310004 | ,000             | ,000 |

## Categorical Variables Codings

|                              |                                         | Frequency | Parameter<br>(1) |
|------------------------------|-----------------------------------------|-----------|------------------|
|                              | 502300005                               | 366       | ,000             |
|                              | 502300006                               | 225       | ,000             |
|                              | 502300007                               | 366       | ,000             |
|                              | 502300214                               | 366       | ,000             |
|                              | 502300411                               | 366       | ,000             |
|                              | 502300415                               | 360       | ,000             |
|                              | 502300416                               | 363       | ,000             |
|                              | 502300811                               | 364       | ,000             |
|                              | 502300913                               | 315       | ,000             |
| weekday veckodag             | 1 måndag                                | 1805      | ,000             |
|                              | 2 tisdag                                | 1812      | 1,000            |
|                              | 3 onsdag                                | 1800      | ,000             |
|                              | 4 torsdag                               | 1794      | ,000             |
|                              | 5 fredag                                | 1788      | ,000             |
|                              | 6 lördag                                | 1735      | ,000             |
|                              | 7 söndag                                | 1741      | ,000             |
| sv7 sjättedelar för standard | 1 fjärde sjundedelen                    | 1423      | ,000             |
|                              | 2 första sjundedelen                    | 3031      | 1,000            |
|                              | 3 andra sjundedelen                     | 1238      | ,000             |
|                              | 4 tredje sjundedelen                    | 1255      | ,000             |
|                              | 5 femte sjundedelen                     | 1445      | ,000             |
|                              | 6 sjätte sjundedelen                    | 1948      | ,000             |
|                              | 7 sjunde sjundedelen                    | 2135      | ,000             |
| season säsong/period         | 1 januari-mars                          | 3182      | ,000             |
|                              | 2 april-maj                             | 2127      | 1,000            |
|                              | 3 juni-augusti                          | 2911      | ,000             |
|                              | 4 september-oktober                     | 2144      | ,000             |
|                              | 5 november-december                     | 2111      | ,000             |
| holiday större helg          | 1 ingen större helg                     | 12078     | ,000             |
|                              | 2 större helg (påsk/midsommar/julonyår) | 397       | 1,000            |

## Categorical Variables Codings

|                              |                                         | Parameter coding |       |
|------------------------------|-----------------------------------------|------------------|-------|
|                              |                                         | (2)              | (3)   |
|                              | 502300005                               | ,000             | ,000  |
|                              | 502300006                               | ,000             | ,000  |
|                              | 502300007                               | ,000             | ,000  |
|                              | 502300214                               | ,000             | ,000  |
|                              | 502300411                               | ,000             | ,000  |
|                              | 502300415                               | ,000             | ,000  |
|                              | 502300416                               | ,000             | ,000  |
|                              | 502300811                               | ,000             | ,000  |
|                              | 502300913                               | ,000             | ,000  |
| weekday veckodag             | 1 måndag                                | ,000             | ,000  |
|                              | 2 tisdag                                | ,000             | ,000  |
|                              | 3 onsdag                                | 1,000            | ,000  |
|                              | 4 torsdag                               | ,000             | 1,000 |
|                              | 5 fredag                                | ,000             | ,000  |
|                              | 6 lördag                                | ,000             | ,000  |
|                              | 7 söndag                                | ,000             | ,000  |
| sv7 sjättedelar för standard | 1 fjärde sjundedelen                    | ,000             | ,000  |
|                              | 2 första sjundedelen                    | ,000             | ,000  |
|                              | 3 andra sjundedelen                     | 1,000            | ,000  |
|                              | 4 tredje sjundedelen                    | ,000             | 1,000 |
|                              | 5 femte sjundedelen                     | ,000             | ,000  |
|                              | 6 sjätte sjundedelen                    | ,000             | ,000  |
|                              | 7 sjunde sjundedelen                    | ,000             | ,000  |
| season säsong/period         | 1 januari-mars                          | ,000             | ,000  |
|                              | 2 april-maj                             | ,000             | ,000  |
|                              | 3 juni-augusti                          | 1,000            | ,000  |
|                              | 4 september-oktober                     | ,000             | 1,000 |
|                              | 5 november-december                     | ,000             | ,000  |
| holiday större helg          | 1 ingen större helg                     |                  |       |
|                              | 2 större helg (påsk/midsommar/julonyår) |                  |       |

## Categorical Variables Codings

|                              |                                         | Parameter coding |       |
|------------------------------|-----------------------------------------|------------------|-------|
|                              |                                         | (4)              | (5)   |
|                              | 502300005                               | ,000             | ,000  |
|                              | 502300006                               | ,000             | ,000  |
|                              | 502300007                               | ,000             | ,000  |
|                              | 502300214                               | ,000             | ,000  |
|                              | 502300411                               | ,000             | ,000  |
|                              | 502300415                               | ,000             | ,000  |
|                              | 502300416                               | ,000             | ,000  |
|                              | 502300811                               | ,000             | ,000  |
|                              | 502300913                               | ,000             | ,000  |
| weekday veckodag             | 1 måndag                                | ,000             | ,000  |
|                              | 2 tisdag                                | ,000             | ,000  |
|                              | 3 onsdag                                | ,000             | ,000  |
|                              | 4 torsdag                               | ,000             | ,000  |
|                              | 5 fredag                                | 1,000            | ,000  |
|                              | 6 lördag                                | ,000             | 1,000 |
|                              | 7 söndag                                | ,000             | ,000  |
| sv7 sjättedelar för standard | 1 fjärde sjundedelen                    | ,000             | ,000  |
|                              | 2 första sjundedelen                    | ,000             | ,000  |
|                              | 3 andra sjundedelen                     | ,000             | ,000  |
|                              | 4 tredje sjundedelen                    | ,000             | ,000  |
|                              | 5 femte sjundedelen                     | 1,000            | ,000  |
|                              | 6 sjätte sjundedelen                    | ,000             | 1,000 |
|                              | 7 sjunde sjundedelen                    | ,000             | ,000  |
| season säsong/period         | 1 januari-mars                          | ,000             |       |
|                              | 2 april-maj                             | ,000             |       |
|                              | 3 juni-augusti                          | ,000             |       |
|                              | 4 september-oktober                     | ,000             |       |
|                              | 5 november-december                     | 1,000            |       |
| holiday större helg          | 1 ingen större helg                     |                  |       |
|                              | 2 större helg (påsk/midsommar/julonyår) |                  |       |



## Categorical Variables Codings

|                              |                                         | Parameter coding |      |
|------------------------------|-----------------------------------------|------------------|------|
|                              |                                         | (6)              | (7)  |
|                              | 502300005                               | ,000             | ,000 |
|                              | 502300006                               | ,000             | ,000 |
|                              | 502300007                               | ,000             | ,000 |
|                              | 502300214                               | ,000             | ,000 |
|                              | 502300411                               | ,000             | ,000 |
|                              | 502300415                               | ,000             | ,000 |
|                              | 502300416                               | ,000             | ,000 |
|                              | 502300811                               | ,000             | ,000 |
|                              | 502300913                               | ,000             | ,000 |
| weekday veckodag             | 1 måndag                                | ,000             |      |
|                              | 2 tisdag                                | ,000             |      |
|                              | 3 onsdag                                | ,000             |      |
|                              | 4 torsdag                               | ,000             |      |
|                              | 5 fredag                                | ,000             |      |
|                              | 6 lördag                                | ,000             |      |
|                              | 7 söndag                                | 1,000            |      |
| sv7 sjättedelar för standard | 1 fjärde sjundedelen                    | ,000             |      |
|                              | 2 första sjundedelen                    | ,000             |      |
|                              | 3 andra sjundedelen                     | ,000             |      |
|                              | 4 tredje sjundedelen                    | ,000             |      |
|                              | 5 femte sjundedelen                     | ,000             |      |
|                              | 6 sjätte sjundedelen                    | ,000             |      |
|                              | 7 sjunde sjundedelen                    | 1,000            |      |
| season säsong/period         | 1 januari-mars                          |                  |      |
|                              | 2 april-maj                             |                  |      |
|                              | 3 juni-augusti                          |                  |      |
|                              | 4 september-oktober                     |                  |      |
|                              | 5 november-december                     |                  |      |
| holiday större helg          | 1 ingen större helg                     |                  |      |
|                              | 2 större helg (påsk/midsommar/julonyår) |                  |      |

## Categorical Variables Codings

|                              |                                         | Parameter coding |      |
|------------------------------|-----------------------------------------|------------------|------|
|                              |                                         | (8)              | (9)  |
|                              | 502300005                               | ,000             | ,000 |
|                              | 502300006                               | ,000             | ,000 |
|                              | 502300007                               | ,000             | ,000 |
|                              | 502300214                               | ,000             | ,000 |
|                              | 502300411                               | ,000             | ,000 |
|                              | 502300415                               | ,000             | ,000 |
|                              | 502300416                               | ,000             | ,000 |
|                              | 502300811                               | ,000             | ,000 |
|                              | 502300913                               | ,000             | ,000 |
| weekday veckodag             | 1 måndag                                |                  |      |
|                              | 2 tisdag                                |                  |      |
|                              | 3 onsdag                                |                  |      |
|                              | 4 torsdag                               |                  |      |
|                              | 5 fredag                                |                  |      |
|                              | 6 lördag                                |                  |      |
|                              | 7 söndag                                |                  |      |
| sv7 sjättedelar för standard | 1 fjärde sjundedelen                    |                  |      |
|                              | 2 första sjundedelen                    |                  |      |
|                              | 3 andra sjundedelen                     |                  |      |
|                              | 4 tredje sjundedelen                    |                  |      |
|                              | 5 femte sjundedelen                     |                  |      |
|                              | 6 sjätte sjundedelen                    |                  |      |
|                              | 7 sjunde sjundedelen                    |                  |      |
| season säsong/period         | 1 januari-mars                          |                  |      |
|                              | 2 april-maj                             |                  |      |
|                              | 3 juni-augusti                          |                  |      |
|                              | 4 september-oktober                     |                  |      |
|                              | 5 november-december                     |                  |      |
| holiday större helg          | 1 ingen större helg                     |                  |      |
|                              | 2 större helg (påsk/midsommar/julonyår) |                  |      |

## Categorical Variables Codings

|                              |                                         | Parameter coding |      |
|------------------------------|-----------------------------------------|------------------|------|
|                              |                                         | (10)             | (11) |
|                              | 502300005                               | ,000             | ,000 |
|                              | 502300006                               | ,000             | ,000 |
|                              | 502300007                               | ,000             | ,000 |
|                              | 502300214                               | ,000             | ,000 |
|                              | 502300411                               | ,000             | ,000 |
|                              | 502300415                               | ,000             | ,000 |
|                              | 502300416                               | ,000             | ,000 |
|                              | 502300811                               | ,000             | ,000 |
|                              | 502300913                               | ,000             | ,000 |
| weekday veckodag             | 1 måndag                                |                  |      |
|                              | 2 tisdag                                |                  |      |
|                              | 3 onsdag                                |                  |      |
|                              | 4 torsdag                               |                  |      |
|                              | 5 fredag                                |                  |      |
|                              | 6 lördag                                |                  |      |
|                              | 7 söndag                                |                  |      |
| sv7 sjättedelar för standard | 1 fjärde sjundedelen                    |                  |      |
|                              | 2 första sjundedelen                    |                  |      |
|                              | 3 andra sjundedelen                     |                  |      |
|                              | 4 tredje sjundedelen                    |                  |      |
|                              | 5 femte sjundedelen                     |                  |      |
|                              | 6 sjätte sjundedelen                    |                  |      |
|                              | 7 sjunde sjundedelen                    |                  |      |
| season säsong/period         | 1 januari-mars                          |                  |      |
|                              | 2 april-maj                             |                  |      |
|                              | 3 juni-augusti                          |                  |      |
|                              | 4 september-oktober                     |                  |      |
|                              | 5 november-december                     |                  |      |
| holiday större helg          | 1 ingen större helg                     |                  |      |
|                              | 2 större helg (påsk/midsommar/julonyår) |                  |      |

## Categorical Variables Codings

|                              |                                         | Parameter coding |      |
|------------------------------|-----------------------------------------|------------------|------|
|                              |                                         | (12)             | (13) |
|                              | 502300005                               | ,000             | ,000 |
|                              | 502300006                               | ,000             | ,000 |
|                              | 502300007                               | ,000             | ,000 |
|                              | 502300214                               | ,000             | ,000 |
|                              | 502300411                               | ,000             | ,000 |
|                              | 502300415                               | ,000             | ,000 |
|                              | 502300416                               | ,000             | ,000 |
|                              | 502300811                               | ,000             | ,000 |
|                              | 502300913                               | ,000             | ,000 |
| weekday veckodag             | 1 måndag                                |                  |      |
|                              | 2 tisdag                                |                  |      |
|                              | 3 onsdag                                |                  |      |
|                              | 4 torsdag                               |                  |      |
|                              | 5 fredag                                |                  |      |
|                              | 6 lördag                                |                  |      |
|                              | 7 söndag                                |                  |      |
| sv7 sjättedelar för standard | 1 fjärde sjundedelen                    |                  |      |
|                              | 2 första sjundedelen                    |                  |      |
|                              | 3 andra sjundedelen                     |                  |      |
|                              | 4 tredje sjundedelen                    |                  |      |
|                              | 5 femte sjundedelen                     |                  |      |
|                              | 6 sjätte sjundedelen                    |                  |      |
|                              | 7 sjunde sjundedelen                    |                  |      |
| season säsong/period         | 1 januari-mars                          |                  |      |
|                              | 2 april-maj                             |                  |      |
|                              | 3 juni-augusti                          |                  |      |
|                              | 4 september-oktober                     |                  |      |
|                              | 5 november-december                     |                  |      |
| holiday större helg          | 1 ingen större helg                     |                  |      |
|                              | 2 större helg (påsk/midsommar/julonyår) |                  |      |

## Categorical Variables Codings

|                              |                                         | Parameter coding |      |
|------------------------------|-----------------------------------------|------------------|------|
|                              |                                         | (14)             | (15) |
|                              | 502300005                               | ,000             | ,000 |
|                              | 502300006                               | ,000             | ,000 |
|                              | 502300007                               | ,000             | ,000 |
|                              | 502300214                               | ,000             | ,000 |
|                              | 502300411                               | ,000             | ,000 |
|                              | 502300415                               | ,000             | ,000 |
|                              | 502300416                               | ,000             | ,000 |
|                              | 502300811                               | ,000             | ,000 |
|                              | 502300913                               | ,000             | ,000 |
| weekday veckodag             | 1 måndag                                |                  |      |
|                              | 2 tisdag                                |                  |      |
|                              | 3 onsdag                                |                  |      |
|                              | 4 torsdag                               |                  |      |
|                              | 5 fredag                                |                  |      |
|                              | 6 lördag                                |                  |      |
|                              | 7 söndag                                |                  |      |
| sv7 sjättedelar för standard | 1 fjärde sjundedelen                    |                  |      |
|                              | 2 första sjundedelen                    |                  |      |
|                              | 3 andra sjundedelen                     |                  |      |
|                              | 4 tredje sjundedelen                    |                  |      |
|                              | 5 femte sjundedelen                     |                  |      |
|                              | 6 sjätte sjundedelen                    |                  |      |
|                              | 7 sjunde sjundedelen                    |                  |      |
| season säsong/period         | 1 januari-mars                          |                  |      |
|                              | 2 april-maj                             |                  |      |
|                              | 3 juni-augusti                          |                  |      |
|                              | 4 september-oktober                     |                  |      |
|                              | 5 november-december                     |                  |      |
| holiday större helg          | 1 ingen större helg                     |                  |      |
|                              | 2 större helg (påsk/midsommar/julonyår) |                  |      |

## Categorical Variables Codings

|                              |                                         | Parameter coding |      |
|------------------------------|-----------------------------------------|------------------|------|
|                              |                                         | (16)             | (17) |
|                              | 502300005                               | ,000             | ,000 |
|                              | 502300006                               | ,000             | ,000 |
|                              | 502300007                               | ,000             | ,000 |
|                              | 502300214                               | ,000             | ,000 |
|                              | 502300411                               | ,000             | ,000 |
|                              | 502300415                               | ,000             | ,000 |
|                              | 502300416                               | ,000             | ,000 |
|                              | 502300811                               | ,000             | ,000 |
|                              | 502300913                               | ,000             | ,000 |
| weekday veckodag             | 1 måndag                                |                  |      |
|                              | 2 tisdag                                |                  |      |
|                              | 3 onsdag                                |                  |      |
|                              | 4 torsdag                               |                  |      |
|                              | 5 fredag                                |                  |      |
|                              | 6 lördag                                |                  |      |
|                              | 7 söndag                                |                  |      |
| sv7 sjättedelar för standard | 1 fjärde sjundedelen                    |                  |      |
|                              | 2 första sjundedelen                    |                  |      |
|                              | 3 andra sjundedelen                     |                  |      |
|                              | 4 tredje sjundedelen                    |                  |      |
|                              | 5 femte sjundedelen                     |                  |      |
|                              | 6 sjätte sjundedelen                    |                  |      |
|                              | 7 sjunde sjundedelen                    |                  |      |
| season säsong/period         | 1 januari-mars                          |                  |      |
|                              | 2 april-maj                             |                  |      |
|                              | 3 juni-augusti                          |                  |      |
|                              | 4 september-oktober                     |                  |      |
|                              | 5 november-december                     |                  |      |
| holiday större helg          | 1 ingen större helg                     |                  |      |
|                              | 2 större helg (påsk/midsommar/julonyår) |                  |      |

## Categorical Variables Codings

|                              |                                         | Parameter coding |      |
|------------------------------|-----------------------------------------|------------------|------|
|                              |                                         | (18)             | (19) |
|                              | 502300005                               | ,000             | ,000 |
|                              | 502300006                               | ,000             | ,000 |
|                              | 502300007                               | ,000             | ,000 |
|                              | 502300214                               | ,000             | ,000 |
|                              | 502300411                               | ,000             | ,000 |
|                              | 502300415                               | ,000             | ,000 |
|                              | 502300416                               | ,000             | ,000 |
|                              | 502300811                               | ,000             | ,000 |
|                              | 502300913                               | ,000             | ,000 |
| weekday veckodag             | 1 måndag                                |                  |      |
|                              | 2 tisdag                                |                  |      |
|                              | 3 onsdag                                |                  |      |
|                              | 4 torsdag                               |                  |      |
|                              | 5 fredag                                |                  |      |
|                              | 6 lördag                                |                  |      |
|                              | 7 söndag                                |                  |      |
| sv7 sjättedelar för standard | 1 fjärde sjundedelen                    |                  |      |
|                              | 2 första sjundedelen                    |                  |      |
|                              | 3 andra sjundedelen                     |                  |      |
|                              | 4 tredje sjundedelen                    |                  |      |
|                              | 5 femte sjundedelen                     |                  |      |
|                              | 6 sjätte sjundedelen                    |                  |      |
|                              | 7 sjunde sjundedelen                    |                  |      |
| season säsong/period         | 1 januari-mars                          |                  |      |
|                              | 2 april-maj                             |                  |      |
|                              | 3 juni-augusti                          |                  |      |
|                              | 4 september-oktober                     |                  |      |
|                              | 5 november-december                     |                  |      |
| holiday större helg          | 1 ingen större helg                     |                  |      |
|                              | 2 större helg (påsk/midsommar/julonyår) |                  |      |

## Categorical Variables Codings

|                              |                                         | Parameter coding |      |
|------------------------------|-----------------------------------------|------------------|------|
|                              |                                         | (20)             | (21) |
|                              | 502300005                               | ,000             | ,000 |
|                              | 502300006                               | ,000             | ,000 |
|                              | 502300007                               | ,000             | ,000 |
|                              | 502300214                               | ,000             | ,000 |
|                              | 502300411                               | ,000             | ,000 |
|                              | 502300415                               | ,000             | ,000 |
|                              | 502300416                               | ,000             | ,000 |
|                              | 502300811                               | ,000             | ,000 |
|                              | 502300913                               | ,000             | ,000 |
| weekday veckodag             | 1 måndag                                |                  |      |
|                              | 2 tisdag                                |                  |      |
|                              | 3 onsdag                                |                  |      |
|                              | 4 torsdag                               |                  |      |
|                              | 5 fredag                                |                  |      |
|                              | 6 lördag                                |                  |      |
|                              | 7 söndag                                |                  |      |
| sv7 sjättedelar för standard | 1 fjärde sjundedelen                    |                  |      |
|                              | 2 första sjundedelen                    |                  |      |
|                              | 3 andra sjundedelen                     |                  |      |
|                              | 4 tredje sjundedelen                    |                  |      |
|                              | 5 femte sjundedelen                     |                  |      |
|                              | 6 sjätte sjundedelen                    |                  |      |
|                              | 7 sjunde sjundedelen                    |                  |      |
| season säsong/period         | 1 januari-mars                          |                  |      |
|                              | 2 april-maj                             |                  |      |
|                              | 3 juni-augusti                          |                  |      |
|                              | 4 september-oktober                     |                  |      |
|                              | 5 november-december                     |                  |      |
| holiday större helg          | 1 ingen större helg                     |                  |      |
|                              | 2 större helg (påsk/midsommar/julonyår) |                  |      |



## Categorical Variables Codings

|                              |                                         | Parameter coding |      |
|------------------------------|-----------------------------------------|------------------|------|
|                              |                                         | (22)             | (23) |
|                              | 502300005                               | ,000             | ,000 |
|                              | 502300006                               | ,000             | ,000 |
|                              | 502300007                               | ,000             | ,000 |
|                              | 502300214                               | ,000             | ,000 |
|                              | 502300411                               | ,000             | ,000 |
|                              | 502300415                               | ,000             | ,000 |
|                              | 502300416                               | ,000             | ,000 |
|                              | 502300811                               | ,000             | ,000 |
|                              | 502300913                               | ,000             | ,000 |
| weekday veckodag             | 1 måndag                                |                  |      |
|                              | 2 tisdag                                |                  |      |
|                              | 3 onsdag                                |                  |      |
|                              | 4 torsdag                               |                  |      |
|                              | 5 fredag                                |                  |      |
|                              | 6 lördag                                |                  |      |
|                              | 7 söndag                                |                  |      |
| sv7 sjättedelar för standard | 1 fjärde sjundedelen                    |                  |      |
|                              | 2 första sjundedelen                    |                  |      |
|                              | 3 andra sjundedelen                     |                  |      |
|                              | 4 tredje sjundedelen                    |                  |      |
|                              | 5 femte sjundedelen                     |                  |      |
|                              | 6 sjätte sjundedelen                    |                  |      |
|                              | 7 sjunde sjundedelen                    |                  |      |
| season säsong/period         | 1 januari-mars                          |                  |      |
|                              | 2 april-maj                             |                  |      |
|                              | 3 juni-augusti                          |                  |      |
|                              | 4 september-oktober                     |                  |      |
|                              | 5 november-december                     |                  |      |
| holiday större helg          | 1 ingen större helg                     |                  |      |
|                              | 2 större helg (påsk/midsommar/julonyår) |                  |      |

## Categorical Variables Codings

|                              |                                         | Parameter coding |      |
|------------------------------|-----------------------------------------|------------------|------|
|                              |                                         | (24)             | (25) |
|                              | 502300005                               | ,000             | ,000 |
|                              | 502300006                               | ,000             | ,000 |
|                              | 502300007                               | ,000             | ,000 |
|                              | 502300214                               | ,000             | ,000 |
|                              | 502300411                               | ,000             | ,000 |
|                              | 502300415                               | ,000             | ,000 |
|                              | 502300416                               | ,000             | ,000 |
|                              | 502300811                               | ,000             | ,000 |
|                              | 502300913                               | ,000             | ,000 |
| weekday veckodag             | 1 måndag                                |                  |      |
|                              | 2 tisdag                                |                  |      |
|                              | 3 onsdag                                |                  |      |
|                              | 4 torsdag                               |                  |      |
|                              | 5 fredag                                |                  |      |
|                              | 6 lördag                                |                  |      |
|                              | 7 söndag                                |                  |      |
| sv7 sjättedelar för standard | 1 fjärde sjundedelen                    |                  |      |
|                              | 2 första sjundedelen                    |                  |      |
|                              | 3 andra sjundedelen                     |                  |      |
|                              | 4 tredje sjundedelen                    |                  |      |
|                              | 5 femte sjundedelen                     |                  |      |
|                              | 6 sjätte sjundedelen                    |                  |      |
|                              | 7 sjunde sjundedelen                    |                  |      |
| season säsong/period         | 1 januari-mars                          |                  |      |
|                              | 2 april-maj                             |                  |      |
|                              | 3 juni-augusti                          |                  |      |
|                              | 4 september-oktober                     |                  |      |
|                              | 5 november-december                     |                  |      |
| holiday större helg          | 1 ingen större helg                     |                  |      |
|                              | 2 större helg (påsk/midsommar/julonyår) |                  |      |

## Categorical Variables Codings

|                              |                                         | Parameter coding |       |
|------------------------------|-----------------------------------------|------------------|-------|
|                              |                                         | (26)             | (27)  |
|                              | 502300005                               | ,000             | 1,000 |
|                              | 502300006                               | ,000             | ,000  |
|                              | 502300007                               | ,000             | ,000  |
|                              | 502300214                               | ,000             | ,000  |
|                              | 502300411                               | ,000             | ,000  |
|                              | 502300415                               | ,000             | ,000  |
|                              | 502300416                               | ,000             | ,000  |
|                              | 502300811                               | ,000             | ,000  |
|                              | 502300913                               | ,000             | ,000  |
| weekday veckodag             | 1 måndag                                |                  |       |
|                              | 2 tisdag                                |                  |       |
|                              | 3 onsdag                                |                  |       |
|                              | 4 torsdag                               |                  |       |
|                              | 5 fredag                                |                  |       |
|                              | 6 lördag                                |                  |       |
|                              | 7 söndag                                |                  |       |
| sv7 sjättedelar för standard | 1 fjärde sjundedelen                    |                  |       |
|                              | 2 första sjundedelen                    |                  |       |
|                              | 3 andra sjundedelen                     |                  |       |
|                              | 4 tredje sjundedelen                    |                  |       |
|                              | 5 femte sjundedelen                     |                  |       |
|                              | 6 sjätte sjundedelen                    |                  |       |
|                              | 7 sjunde sjundedelen                    |                  |       |
| season säsong/period         | 1 januari-mars                          |                  |       |
|                              | 2 april-maj                             |                  |       |
|                              | 3 juni-augusti                          |                  |       |
|                              | 4 september-oktober                     |                  |       |
|                              | 5 november-december                     |                  |       |
| holiday större helg          | 1 ingen större helg                     |                  |       |
|                              | 2 större helg (påsk/midsommar/julonyår) |                  |       |

## Categorical Variables Codings

|                              |                                         | Parameter coding |       |
|------------------------------|-----------------------------------------|------------------|-------|
|                              |                                         | (28)             | (29)  |
|                              | 502300005                               | ,000             | ,000  |
|                              | 502300006                               | 1,000            | ,000  |
|                              | 502300007                               | ,000             | 1,000 |
|                              | 502300214                               | ,000             | ,000  |
|                              | 502300411                               | ,000             | ,000  |
|                              | 502300415                               | ,000             | ,000  |
|                              | 502300416                               | ,000             | ,000  |
|                              | 502300811                               | ,000             | ,000  |
|                              | 502300913                               | ,000             | ,000  |
| weekday veckodag             | 1 måndag                                |                  |       |
|                              | 2 tisdag                                |                  |       |
|                              | 3 onsdag                                |                  |       |
|                              | 4 torsdag                               |                  |       |
|                              | 5 fredag                                |                  |       |
|                              | 6 lördag                                |                  |       |
|                              | 7 söndag                                |                  |       |
| sv7 sjättedelar för standard | 1 fjärde sjundedelen                    |                  |       |
|                              | 2 första sjundedelen                    |                  |       |
|                              | 3 andra sjundedelen                     |                  |       |
|                              | 4 tredje sjundedelen                    |                  |       |
|                              | 5 femte sjundedelen                     |                  |       |
|                              | 6 sjätte sjundedelen                    |                  |       |
|                              | 7 sjunde sjundedelen                    |                  |       |
| season säsong/period         | 1 januari-mars                          |                  |       |
|                              | 2 april-maj                             |                  |       |
|                              | 3 juni-augusti                          |                  |       |
|                              | 4 september-oktober                     |                  |       |
|                              | 5 november-december                     |                  |       |
| holiday större helg          | 1 ingen större helg                     |                  |       |
|                              | 2 större helg (påsk/midsommar/julonyår) |                  |       |

## Categorical Variables Codings

|                              |                                         | Parameter coding |       |
|------------------------------|-----------------------------------------|------------------|-------|
|                              |                                         | (30)             | (31)  |
|                              | 502300005                               | ,000             | ,000  |
|                              | 502300006                               | ,000             | ,000  |
|                              | 502300007                               | ,000             | ,000  |
|                              | 502300214                               | 1,000            | ,000  |
|                              | 502300411                               | ,000             | 1,000 |
|                              | 502300415                               | ,000             | ,000  |
|                              | 502300416                               | ,000             | ,000  |
|                              | 502300811                               | ,000             | ,000  |
|                              | 502300913                               | ,000             | ,000  |
| weekday veckodag             | 1 måndag                                |                  |       |
|                              | 2 tisdag                                |                  |       |
|                              | 3 onsdag                                |                  |       |
|                              | 4 torsdag                               |                  |       |
|                              | 5 fredag                                |                  |       |
|                              | 6 lördag                                |                  |       |
|                              | 7 söndag                                |                  |       |
| sv7 sjättedelar för standard | 1 fjärde sjundedelen                    |                  |       |
|                              | 2 första sjundedelen                    |                  |       |
|                              | 3 andra sjundedelen                     |                  |       |
|                              | 4 tredje sjundedelen                    |                  |       |
|                              | 5 femte sjundedelen                     |                  |       |
|                              | 6 sjätte sjundedelen                    |                  |       |
|                              | 7 sjunde sjundedelen                    |                  |       |
| season säsong/period         | 1 januari-mars                          |                  |       |
|                              | 2 april-maj                             |                  |       |
|                              | 3 juni-augusti                          |                  |       |
|                              | 4 september-oktober                     |                  |       |
|                              | 5 november-december                     |                  |       |
| holiday större helg          | 1 ingen större helg                     |                  |       |
|                              | 2 större helg (påsk/midsommar/julonyår) |                  |       |

## Categorical Variables Codings

|                              |                                         | Parameter coding |       |
|------------------------------|-----------------------------------------|------------------|-------|
|                              |                                         | (32)             | (33)  |
|                              | 502300005                               | ,000             | ,000  |
|                              | 502300006                               | ,000             | ,000  |
|                              | 502300007                               | ,000             | ,000  |
|                              | 502300214                               | ,000             | ,000  |
|                              | 502300411                               | ,000             | ,000  |
|                              | 502300415                               | 1,000            | ,000  |
|                              | 502300416                               | ,000             | 1,000 |
|                              | 502300811                               | ,000             | ,000  |
|                              | 502300913                               | ,000             | ,000  |
| weekday veckodag             | 1 måndag                                |                  |       |
|                              | 2 tisdag                                |                  |       |
|                              | 3 onsdag                                |                  |       |
|                              | 4 torsdag                               |                  |       |
|                              | 5 fredag                                |                  |       |
|                              | 6 lördag                                |                  |       |
|                              | 7 söndag                                |                  |       |
| sv7 sjättedelar för standard | 1 fjärde sjundedelen                    |                  |       |
|                              | 2 första sjundedelen                    |                  |       |
|                              | 3 andra sjundedelen                     |                  |       |
|                              | 4 tredje sjundedelen                    |                  |       |
|                              | 5 femte sjundedelen                     |                  |       |
|                              | 6 sjätte sjundedelen                    |                  |       |
|                              | 7 sjunde sjundedelen                    |                  |       |
| season säsong/period         | 1 januari-mars                          |                  |       |
|                              | 2 april-maj                             |                  |       |
|                              | 3 juni-augusti                          |                  |       |
|                              | 4 september-oktober                     |                  |       |
|                              | 5 november-december                     |                  |       |
| holiday större helg          | 1 ingen större helg                     |                  |       |
|                              | 2 större helg (påsk/midsommar/julonyår) |                  |       |

## Categorical Variables Codings

|                              |                                         | Parameter coding |       |
|------------------------------|-----------------------------------------|------------------|-------|
|                              |                                         | (34)             | (35)  |
|                              | 502300005                               | ,000             | ,000  |
|                              | 502300006                               | ,000             | ,000  |
|                              | 502300007                               | ,000             | ,000  |
|                              | 502300214                               | ,000             | ,000  |
|                              | 502300411                               | ,000             | ,000  |
|                              | 502300415                               | ,000             | ,000  |
|                              | 502300416                               | ,000             | ,000  |
|                              | 502300811                               | 1,000            | ,000  |
|                              | 502300913                               | ,000             | 1,000 |
| weekday veckodag             | 1 måndag                                |                  |       |
|                              | 2 tisdag                                |                  |       |
|                              | 3 onsdag                                |                  |       |
|                              | 4 torsdag                               |                  |       |
|                              | 5 fredag                                |                  |       |
|                              | 6 lördag                                |                  |       |
|                              | 7 söndag                                |                  |       |
| sv7 sjättedelar för standard | 1 fjärde sjundedelen                    |                  |       |
|                              | 2 första sjundedelen                    |                  |       |
|                              | 3 andra sjundedelen                     |                  |       |
|                              | 4 tredje sjundedelen                    |                  |       |
|                              | 5 femte sjundedelen                     |                  |       |
|                              | 6 sjätte sjundedelen                    |                  |       |
|                              | 7 sjunde sjundedelen                    |                  |       |
| season säsong/period         | 1 januari-mars                          |                  |       |
|                              | 2 april-maj                             |                  |       |
|                              | 3 juni-augusti                          |                  |       |
|                              | 4 september-oktober                     |                  |       |
|                              | 5 november-december                     |                  |       |
| holiday större helg          | 1 ingen större helg                     |                  |       |
|                              | 2 större helg (påsk/midsommar/julonyår) |                  |       |

**Block 0: Beginning Block**

Classification Table<sup>a,b</sup>

| Observed           |                               |                           | Predicted                     |                      |
|--------------------|-------------------------------|---------------------------|-------------------------------|----------------------|
|                    |                               |                           | handt1 händelse larger than 1 |                      |
|                    |                               |                           | 0 ingen eller en händelse     | 1 mer än en händelse |
| Step 0             | handt1 händelse larger than 1 | 0 ingen eller en händelse | 12229                         | 0                    |
|                    |                               | 1 mer än en händelse      | 246                           | 0                    |
| Overall Percentage |                               |                           |                               |                      |

Classification Table<sup>a,b</sup>

| Observed           |                               |                           | Predicted          |
|--------------------|-------------------------------|---------------------------|--------------------|
|                    |                               |                           | Percentage Correct |
| Step 0             | handt1 händelse larger than 1 | 0 ingen eller en händelse | 100,0              |
|                    |                               | 1 mer än en händelse      | ,0                 |
| Overall Percentage |                               |                           | 98,0               |

a. Constant is included in the model.

b. The cut value is ,500

Variables in the Equation

|                 | B      | S.E. | Wald     | df | Sig. | Exp(B) |
|-----------------|--------|------|----------|----|------|--------|
| Step 0 Constant | -3,906 | ,064 | 3679,612 | 1  | ,000 | ,020   |



## Variables not in the Equation

|        |           |            | Score   | df | Sig. |
|--------|-----------|------------|---------|----|------|
| Step 0 | Variables | sv7        | 5,330   | 6  | ,502 |
|        |           | sv7(1)     | 4,275   | 1  | ,039 |
|        |           | sv7(2)     | ,008    | 1  | ,929 |
|        |           | sv7(3)     | ,232    | 1  | ,630 |
|        |           | sv7(4)     | ,010    | 1  | ,921 |
|        |           | sv7(5)     | 1,811   | 1  | ,178 |
|        |           | sv7(6)     | ,246    | 1  | ,620 |
|        |           | VASTY2     | 211,294 | 35 | ,000 |
|        |           | VASTY2(1)  | ,109    | 1  | ,741 |
|        |           | VASTY2(2)  | 2,111   | 1  | ,146 |
|        |           | VASTY2(3)  | 5,608   | 1  | ,018 |
|        |           | VASTY2(4)  | ,094    | 1  | ,759 |
|        |           | VASTY2(5)  | 1,981   | 1  | ,159 |
|        |           | VASTY2(6)  | 7,542   | 1  | ,006 |
|        |           | VASTY2(7)  | 3,478   | 1  | ,062 |
|        |           | VASTY2(8)  | ,006    | 1  | ,940 |
|        |           | VASTY2(9)  | ,082    | 1  | ,775 |
|        |           | VASTY2(10) | 36,459  | 1  | ,000 |
|        |           | VASTY2(11) | 27,814  | 1  | ,000 |
|        |           | VASTY2(12) | 2,573   | 1  | ,109 |
|        |           | VASTY2(13) | ,705    | 1  | ,401 |
|        |           | VASTY2(14) | ,209    | 1  | ,647 |
|        |           | VASTY2(15) | ,209    | 1  | ,647 |
|        |           | VASTY2(16) | ,071    | 1  | ,789 |
|        |           | VASTY2(17) | 7,564   | 1  | ,006 |
|        |           | VASTY2(18) | 7,500   | 1  | ,006 |
|        |           | VASTY2(19) | 5,608   | 1  | ,018 |
|        |           | VASTY2(20) | 1,471   | 1  | ,225 |
|        |           | VASTY2(21) | 2,573   | 1  | ,109 |
|        |           | VASTY2(22) | ,474    | 1  | ,491 |
|        |           | VASTY2(23) | 41,219  | 1  | ,000 |
|        |           | VASTY2(24) | 20,216  | 1  | ,000 |
|        |           | VASTY2(25) | ,290    | 1  | ,590 |
|        |           | VASTY2(26) | ,550    | 1  | ,458 |
|        |           | VASTY2(27) | 5,629   | 1  | ,018 |
|        |           | VASTY2(28) | 2,766   | 1  | ,096 |
|        |           | VASTY2(29) | 7,585   | 1  | ,006 |
|        |           | VASTY2(30) | ,089    | 1  | ,765 |
|        |           | VASTY2(31) | 8,820   | 1  | ,003 |
|        |           | VASTY2(32) | ,652    | 1  | ,419 |
|        |           | VASTY2(33) | 1,464   | 1  | ,226 |
|        |           | VASTY2(34) | 5,587   | 1  | ,018 |
|        |           | VASTY2(35) | 7,764   | 1  | ,005 |

## Variables not in the Equation

|                    | Score   | df | Sig. |
|--------------------|---------|----|------|
| weekday            | 3,270   | 6  | ,774 |
| weekday(1)         | ,002    | 1  | ,961 |
| weekday(2)         | ,075    | 1  | ,784 |
| weekday(3)         | ,720    | 1  | ,396 |
| weekday(4)         | ,019    | 1  | ,892 |
| weekday(5)         | 2,336   | 1  | ,126 |
| weekday(6)         | ,004    | 1  | ,951 |
| holiday(1)         | 3,138   | 1  | ,076 |
| season             | 6,828   | 4  | ,145 |
| season(1)          | ,483    | 1  | ,487 |
| season(2)          | 3,014   | 1  | ,083 |
| season(3)          | 4,003   | 1  | ,045 |
| season(4)          | ,934    | 1  | ,334 |
| Overall Statistics | 233,058 | 52 | ,000 |

## Block 1: Method = Enter

## Omnibus Tests of Model Coefficients

|             | Chi-square | df | Sig. |
|-------------|------------|----|------|
| Step 1 Step | 231,067    | 52 | ,000 |
| Block       | 231,067    | 52 | ,000 |
| Model       | 231,067    | 52 | ,000 |

## Model Summary

| Step | -2 Log likelihood     | Cox & Snell R Square | Nagelkerke R Square |
|------|-----------------------|----------------------|---------------------|
| 1    | 2187,715 <sup>a</sup> | ,018                 | ,104                |

a. Estimation terminated at iteration number 20 because maximum iterations has been reached. Final solution cannot be found.

Classification Table<sup>a</sup>

|                    |                               | Predicted                 |                      |
|--------------------|-------------------------------|---------------------------|----------------------|
|                    |                               | 0 ingen eller en händelse | 1 mer än en händelse |
| Step 1             | handt1 händelse larger than 1 | 12229                     | 0                    |
|                    |                               | 246                       | 0                    |
| Overall Percentage |                               |                           |                      |

Classification Table<sup>a</sup>

| Observed           |                               |                           | Predicted          |
|--------------------|-------------------------------|---------------------------|--------------------|
|                    |                               |                           | Percentage Correct |
| Step 1             | handt1 händelse larger than 1 | 0 ingen eller en händelse | 100,0              |
|                    |                               | 1 mer än en händelse      | ,0                 |
| Overall Percentage |                               |                           | 98,0               |

a. The cut value is ,500

Variables in the Equation

|                         | B       | S.E.     | Wald    | df | Sig. | Exp(B) |
|-------------------------|---------|----------|---------|----|------|--------|
| Step 1 <sup>a</sup> sv7 |         |          | 9,407   | 6  | ,152 |        |
| sv7(1)                  | -,011   | ,268     | ,002    | 1  | ,969 | ,990   |
| sv7(2)                  | ,033    | ,283     | ,014    | 1  | ,907 | 1,034  |
| sv7(3)                  | ,076    | ,272     | ,077    | 1  | ,781 | 1,079  |
| sv7(4)                  | -,037   | ,269     | ,019    | 1  | ,891 | ,964   |
| sv7(5)                  | ,181    | ,248     | ,531    | 1  | ,466 | 1,198  |
| sv7(6)                  | ,702    | ,281     | 6,219   | 1  | ,013 | 2,017  |
| VASTY2                  |         |          | 121,309 | 35 | ,000 |        |
| VASTY2(1)               | ,372    | ,578     | ,413    | 1  | ,520 | 1,450  |
| VASTY2(2)               | ,480    | ,559     | ,735    | 1  | ,391 | 1,616  |
| VASTY2(3)               | -1,607  | 1,099    | 2,140   | 1  | ,144 | ,200   |
| VASTY2(4)               | ,459    | ,576     | ,635    | 1  | ,425 | 1,583  |
| VASTY2(5)               | -,413   | ,737     | ,313    | 1  | ,576 | ,662   |
| VASTY2(6)               | -17,450 | 2090,548 | ,000    | 1  | ,993 | ,000   |
| VASTY2(7)               | ,915    | ,538     | 2,891   | 1  | ,089 | 2,497  |
| VASTY2(8)               | ,357    | ,593     | ,363    | 1  | ,547 | 1,429  |
| VASTY2(9)               | ,240    | ,611     | ,154    | 1  | ,694 | 1,271  |
| VASTY2(10)              | 1,198   | ,520     | 5,311   | 1  | ,021 | 3,313  |
| VASTY2(11)              | 1,462   | ,504     | 8,400   | 1  | ,004 | 4,315  |
| VASTY2(12)              | -,754   | ,742     | 1,034   | 1  | ,309 | ,470   |
| VASTY2(13)              | -,434   | ,657     | ,437    | 1  | ,509 | ,648   |
| VASTY2(14)              | -,039   | ,617     | ,004    | 1  | ,950 | ,962   |
| VASTY2(15)              | -,160   | ,625     | ,065    | 1  | ,798 | ,853   |
| VASTY2(16)              | -,122   | ,744     | ,027    | 1  | ,870 | ,885   |
| VASTY2(17)              | -16,959 | 2089,320 | ,000    | 1  | ,994 | ,000   |
| VASTY2(18)              | -16,867 | 2104,368 | ,000    | 1  | ,994 | ,000   |
| VASTY2(19)              | -1,565  | 1,114    | 1,974   | 1  | ,160 | ,209   |
| VASTY2(20)              | -,673   | ,744     | ,817    | 1  | ,366 | ,510   |
| VASTY2(21)              | -,515   | ,735     | ,491    | 1  | ,484 | ,598   |
| VASTY2(22)              | ,589    | ,563     | 1,095   | 1  | ,295 | 1,803  |
| VASTY2(23)              | 1,600   | ,499     | 10,297  | 1  | ,001 | 4,953  |

## Variables in the Equation

|                     |            | 95% C.I. for EXP(B) |        |
|---------------------|------------|---------------------|--------|
|                     |            | Lower               | Upper  |
| Step 1 <sup>a</sup> | sv7        |                     |        |
|                     | sv7(1)     | ,586                | 1,672  |
|                     | sv7(2)     | ,594                | 1,799  |
|                     | sv7(3)     | ,633                | 1,840  |
|                     | sv7(4)     | ,569                | 1,634  |
|                     | sv7(5)     | ,737                | 1,948  |
|                     | sv7(6)     | 1,162               | 3,502  |
|                     | VASTY2     |                     |        |
|                     | VASTY2(1)  | ,467                | 4,503  |
|                     | VASTY2(2)  | ,540                | 4,836  |
|                     | VASTY2(3)  | ,023                | 1,727  |
|                     | VASTY2(4)  | ,512                | 4,897  |
|                     | VASTY2(5)  | ,156                | 2,809  |
|                     | VASTY2(6)  | ,000                | .      |
|                     | VASTY2(7)  | ,870                | 7,170  |
|                     | VASTY2(8)  | ,447                | 4,570  |
|                     | VASTY2(9)  | ,384                | 4,209  |
|                     | VASTY2(10) | 1,196               | 9,176  |
|                     | VASTY2(11) | 1,605               | 11,600 |
|                     | VASTY2(12) | ,110                | 2,012  |
|                     | VASTY2(13) | ,179                | 2,347  |
|                     | VASTY2(14) | ,287                | 3,226  |
|                     | VASTY2(15) | ,251                | 2,901  |
|                     | VASTY2(16) | ,206                | 3,808  |
|                     | VASTY2(17) | ,000                | .      |
|                     | VASTY2(18) | ,000                | .      |
|                     | VASTY2(19) | ,024                | 1,856  |
|                     | VASTY2(20) | ,119                | 2,195  |
|                     | VASTY2(21) | ,142                | 2,523  |
|                     | VASTY2(22) | ,598                | 5,437  |
|                     | VASTY2(23) | 1,864               | 13,162 |

review only

## Variables in the Equation

|            | B       | S.E.     | Wald   | df | Sig. | Exp(B) |
|------------|---------|----------|--------|----|------|--------|
| VASTY2(24) | 1,214   | ,512     | 5,619  | 1  | ,018 | 3,366  |
| VASTY2(25) | ,518    | ,594     | ,761   | 1  | ,383 | 1,679  |
| VASTY2(26) | -,126   | ,677     | ,034   | 1  | ,853 | ,882   |
| VASTY2(27) | -1,951  | 1,105    | 3,122  | 1  | ,077 | ,142   |
| VASTY2(28) | -1,815  | 1,118    | 2,633  | 1  | ,105 | ,163   |
| VASTY2(29) | -17,588 | 2095,379 | ,000   | 1  | ,993 | ,000   |
| VASTY2(30) | ,462    | ,578     | ,641   | 1  | ,423 | 1,588  |
| VASTY2(31) | 1,133   | ,539     | 4,414  | 1  | ,036 | 3,105  |
| VASTY2(32) | ,036    | ,661     | ,003   | 1  | ,957 | 1,037  |
| VASTY2(33) | -,191   | ,701     | ,074   | 1  | ,786 | ,826   |
| VASTY2(34) | -1,674  | 1,098    | 2,323  | 1  | ,127 | ,187   |
| VASTY2(35) | ,990    | ,535     | 3,416  | 1  | ,065 | 2,690  |
| weekday    |         |          | 2,922  | 6  | ,819 |        |
| weekday(1) | -,105   | ,235     | ,199   | 1  | ,655 | ,900   |
| weekday(2) | -,154   | ,239     | ,419   | 1  | ,517 | ,857   |
| weekday(3) | ,026    | ,229     | ,013   | 1  | ,910 | 1,026  |
| weekday(4) | -,040   | ,236     | ,029   | 1  | ,864 | ,960   |
| weekday(5) | -,362   | ,258     | 1,958  | 1  | ,162 | ,697   |
| weekday(6) | -,128   | ,240     | ,285   | 1  | ,594 | ,880   |
| holiday(1) | -,821   | ,596     | 1,895  | 1  | ,169 | ,440   |
| season     |         |          | 5,341  | 4  | ,254 |        |
| season(1)  | ,084    | ,198     | ,180   | 1  | ,671 | 1,088  |
| season(2)  | -,219   | ,200     | 1,201  | 1  | ,273 | ,803   |
| season(3)  | ,226    | ,190     | 1,422  | 1  | ,233 | 1,254  |
| season(4)  | -,102   | ,214     | ,229   | 1  | ,632 | ,903   |
| Constant   | -4,184  | ,515     | 65,910 | 1  | ,000 | ,015   |

## Variables in the Equation

|            | 95% C.I. for EXP(B) |       |
|------------|---------------------|-------|
|            | Lower               | Upper |
| VASTY2(24) | 1,234               | 9,180 |
| VASTY2(25) | ,524                | 5,375 |
| VASTY2(26) | ,234                | 3,324 |
| VASTY2(27) | ,016                | 1,238 |
| VASTY2(28) | ,018                | 1,458 |
| VASTY2(29) | ,000                | .     |
| VASTY2(30) | ,512                | 4,926 |
| VASTY2(31) | 1,079               | 8,935 |
| VASTY2(32) | ,284                | 3,789 |
| VASTY2(33) | ,209                | 3,265 |
| VASTY2(34) | ,022                | 1,614 |
| VASTY2(35) | ,942                | 7,682 |
| weekday    |                     |       |
| weekday(1) | ,568                | 1,427 |
| weekday(2) | ,537                | 1,368 |
| weekday(3) | ,655                | 1,608 |
| weekday(4) | ,605                | 1,525 |
| weekday(5) | ,420                | 1,156 |
| weekday(6) | ,550                | 1,407 |
| holiday(1) | ,137                | 1,416 |
| season     |                     |       |
| season(1)  | ,738                | 1,603 |
| season(2)  | ,542                | 1,189 |
| season(3)  | ,864                | 1,820 |
| season(4)  | ,594                | 1,373 |
| Constant   |                     |       |

a. Variable(s) entered on step 1: sv7, VASTY2, weekday, holiday, season.

\*\*

```
LOGISTIC REGRESSION VARIABLES dod01
/METHOD=ENTER bv1 VASTY2 weekday holiday season
/CONTRAST (bv1)=Indicator(1)
/CONTRAST (VASTY2)=Indicator(1)
/CONTRAST (weekday)=Indicator(1)
/CONTRAST (holiday)=Indicator(1)
/CONTRAST (season)=Indicator(1)
/PRINT=CI(95)
/CRITERIA=PIN(0.05) POUT(0.10) ITERATE(20) CUT(0.5).
```

## Logistic Regression

[DataSet6] C:\cWordjan\Rafaela\_VCS\alla\_tillsammans\abo\_bjo\_vasa\_v1.sav

### Case Processing Summary

| Unweighted Cases <sup>a</sup> |                      | N     | Percent |
|-------------------------------|----------------------|-------|---------|
| Selected Cases                | Included in Analysis | 12475 | 100,0   |
|                               | Missing Cases        | 0     | ,0      |
|                               | Total                | 12475 | 100,0   |
| Unselected Cases              |                      | 0     | ,0      |
| Total                         |                      | 12475 | 100,0   |

a. If weight is in effect, see classification table for the total number of cases.

### Dependent Variable Encoding

| Original Value       | Internal Value |
|----------------------|----------------|
| 0 inget dödsfall     | 0              |
| 1 minst ett dödsfall | 1              |

### Categorical Variables Codings

|                           | Frequency | Parameter |
|---------------------------|-----------|-----------|
|                           |           | (1)       |
| VASTY2 (SAIR*10000)+VASTY | 403073101 | 365 ,000  |
|                           | 403073102 | 362 1,000 |
|                           | 403073103 | 365 ,000  |
|                           | 403073202 | 365 ,000  |
|                           | 403073203 | 365 ,000  |
|                           | 403073204 | 330 ,000  |
|                           | 403073303 | 364 ,000  |
|                           | 403073651 | 362 ,000  |
|                           | 403073771 | 365 ,000  |
|                           | 403133102 | 341 ,000  |
|                           | 403133106 | 365 ,000  |
|                           | 403133107 | 365 ,000  |
|                           | 403133109 | 365 ,000  |
|                           | 403133202 | 365 ,000  |
|                           | 403133203 | 365 ,000  |
|                           | 403133204 | 365 ,000  |
|                           | 403133315 | 177 ,000  |
|                           | 403133322 | 365 ,000  |
|                           | 403133401 | 362 ,000  |
|                           | 403133402 | 365 ,000  |
|                           | 403133550 | 298 ,000  |
|                           | 403133772 | 365 ,000  |
|                           | 403135803 | 365 ,000  |
|                           | 404060001 | 365 ,000  |
|                           | 404060002 | 366 ,000  |

## Categorical Variables Codings

|                           |           | Parameter coding |       |
|---------------------------|-----------|------------------|-------|
|                           |           | (2)              | (3)   |
| VASTY2 (SAIR*10000)+VASTY | 403073101 | ,000             | ,000  |
|                           | 403073102 | ,000             | ,000  |
|                           | 403073103 | 1,000            | ,000  |
|                           | 403073202 | ,000             | 1,000 |
|                           | 403073203 | ,000             | ,000  |
|                           | 403073204 | ,000             | ,000  |
|                           | 403073303 | ,000             | ,000  |
|                           | 403073651 | ,000             | ,000  |
|                           | 403073771 | ,000             | ,000  |
|                           | 403133102 | ,000             | ,000  |
|                           | 403133106 | ,000             | ,000  |
|                           | 403133107 | ,000             | ,000  |
|                           | 403133109 | ,000             | ,000  |
|                           | 403133202 | ,000             | ,000  |
|                           | 403133203 | ,000             | ,000  |
|                           | 403133204 | ,000             | ,000  |
|                           | 403133315 | ,000             | ,000  |
|                           | 403133322 | ,000             | ,000  |
|                           | 403133401 | ,000             | ,000  |
|                           | 403133402 | ,000             | ,000  |
|                           | 403133550 | ,000             | ,000  |
|                           | 403133772 | ,000             | ,000  |
|                           | 403135803 | ,000             | ,000  |
|                           | 404060001 | ,000             | ,000  |
|                           | 404060002 | ,000             | ,000  |

Only



**Categorical Variables Codings**

|                           |           | Parameter coding |       |
|---------------------------|-----------|------------------|-------|
|                           |           | (4)              | (5)   |
| VASTY2 (SAIR*10000)+VASTY | 403073101 | ,000             | ,000  |
|                           | 403073102 | ,000             | ,000  |
|                           | 403073103 | ,000             | ,000  |
|                           | 403073202 | ,000             | ,000  |
|                           | 403073203 | 1,000            | ,000  |
|                           | 403073204 | ,000             | 1,000 |
|                           | 403073303 | ,000             | ,000  |
|                           | 403073651 | ,000             | ,000  |
|                           | 403073771 | ,000             | ,000  |
|                           | 403133102 | ,000             | ,000  |
|                           | 403133106 | ,000             | ,000  |
|                           | 403133107 | ,000             | ,000  |
|                           | 403133109 | ,000             | ,000  |
|                           | 403133202 | ,000             | ,000  |
|                           | 403133203 | ,000             | ,000  |
|                           | 403133204 | ,000             | ,000  |
|                           | 403133315 | ,000             | ,000  |
|                           | 403133322 | ,000             | ,000  |
|                           | 403133401 | ,000             | ,000  |
|                           | 403133402 | ,000             | ,000  |
|                           | 403133550 | ,000             | ,000  |
|                           | 403133772 | ,000             | ,000  |
|                           | 403135803 | ,000             | ,000  |
|                           | 404060001 | ,000             | ,000  |
|                           | 404060002 | ,000             | ,000  |

Only

## Categorical Variables Codings

|                           |           | Parameter coding |       |
|---------------------------|-----------|------------------|-------|
|                           |           | (6)              | (7)   |
| VASTY2 (SAIR*10000)+VASTY | 403073101 | ,000             | ,000  |
|                           | 403073102 | ,000             | ,000  |
|                           | 403073103 | ,000             | ,000  |
|                           | 403073202 | ,000             | ,000  |
|                           | 403073203 | ,000             | ,000  |
|                           | 403073204 | ,000             | ,000  |
|                           | 403073303 | 1,000            | ,000  |
|                           | 403073651 | ,000             | 1,000 |
|                           | 403073771 | ,000             | ,000  |
|                           | 403133102 | ,000             | ,000  |
|                           | 403133106 | ,000             | ,000  |
|                           | 403133107 | ,000             | ,000  |
|                           | 403133109 | ,000             | ,000  |
|                           | 403133202 | ,000             | ,000  |
|                           | 403133203 | ,000             | ,000  |
|                           | 403133204 | ,000             | ,000  |
|                           | 403133315 | ,000             | ,000  |
|                           | 403133322 | ,000             | ,000  |
|                           | 403133401 | ,000             | ,000  |
|                           | 403133402 | ,000             | ,000  |
|                           | 403133550 | ,000             | ,000  |
|                           | 403133772 | ,000             | ,000  |
|                           | 403135803 | ,000             | ,000  |
|                           | 404060001 | ,000             | ,000  |
|                           | 404060002 | ,000             | ,000  |

Only

**Categorical Variables Codings**

|                           |           | Parameter coding |       |
|---------------------------|-----------|------------------|-------|
|                           |           | (8)              | (9)   |
| VASTY2 (SAIR*10000)+VASTY | 403073101 | ,000             | ,000  |
|                           | 403073102 | ,000             | ,000  |
|                           | 403073103 | ,000             | ,000  |
|                           | 403073202 | ,000             | ,000  |
|                           | 403073203 | ,000             | ,000  |
|                           | 403073204 | ,000             | ,000  |
|                           | 403073303 | ,000             | ,000  |
|                           | 403073651 | ,000             | ,000  |
|                           | 403073771 | 1,000            | ,000  |
|                           | 403133102 | ,000             | 1,000 |
|                           | 403133106 | ,000             | ,000  |
|                           | 403133107 | ,000             | ,000  |
|                           | 403133109 | ,000             | ,000  |
|                           | 403133202 | ,000             | ,000  |
|                           | 403133203 | ,000             | ,000  |
|                           | 403133204 | ,000             | ,000  |
|                           | 403133315 | ,000             | ,000  |
|                           | 403133322 | ,000             | ,000  |
|                           | 403133401 | ,000             | ,000  |
|                           | 403133402 | ,000             | ,000  |
|                           | 403133550 | ,000             | ,000  |
|                           | 403133772 | ,000             | ,000  |
|                           | 403135803 | ,000             | ,000  |
|                           | 404060001 | ,000             | ,000  |
|                           | 404060002 | ,000             | ,000  |

Only

## Categorical Variables Codings

|                           |           | Parameter coding |       |
|---------------------------|-----------|------------------|-------|
|                           |           | (10)             | (11)  |
| VASTY2 (SAIR*10000)+VASTY | 403073101 | ,000             | ,000  |
|                           | 403073102 | ,000             | ,000  |
|                           | 403073103 | ,000             | ,000  |
|                           | 403073202 | ,000             | ,000  |
|                           | 403073203 | ,000             | ,000  |
|                           | 403073204 | ,000             | ,000  |
|                           | 403073303 | ,000             | ,000  |
|                           | 403073651 | ,000             | ,000  |
|                           | 403073771 | ,000             | ,000  |
|                           | 403133102 | ,000             | ,000  |
|                           | 403133106 | 1,000            | ,000  |
|                           | 403133107 | ,000             | 1,000 |
|                           | 403133109 | ,000             | ,000  |
|                           | 403133202 | ,000             | ,000  |
|                           | 403133203 | ,000             | ,000  |
|                           | 403133204 | ,000             | ,000  |
|                           | 403133315 | ,000             | ,000  |
|                           | 403133322 | ,000             | ,000  |
|                           | 403133401 | ,000             | ,000  |
|                           | 403133402 | ,000             | ,000  |
|                           | 403133550 | ,000             | ,000  |
|                           | 403133772 | ,000             | ,000  |
|                           | 403135803 | ,000             | ,000  |
|                           | 404060001 | ,000             | ,000  |
|                           | 404060002 | ,000             | ,000  |

Only

1  
2  
3  
4  
5  
6  
7  
8  
9  
10  
11  
12  
13  
14  
15  
16  
17  
18  
19  
20  
21  
22  
23  
24  
25  
26  
27  
28  
29  
30  
31  
32  
33  
34  
35  
36  
37  
38  
39  
40  
41  
42  
43  
44  
45  
46  
47  
48  
49  
50  
51  
52  
53  
54  
55  
56  
57  
58  
59  
60

**Categorical Variables Codings**

|                           |           | Parameter coding |       |
|---------------------------|-----------|------------------|-------|
|                           |           | (12)             | (13)  |
| VASTY2 (SAIR*10000)+VASTY | 403073101 | ,000             | ,000  |
|                           | 403073102 | ,000             | ,000  |
|                           | 403073103 | ,000             | ,000  |
|                           | 403073202 | ,000             | ,000  |
|                           | 403073203 | ,000             | ,000  |
|                           | 403073204 | ,000             | ,000  |
|                           | 403073303 | ,000             | ,000  |
|                           | 403073651 | ,000             | ,000  |
|                           | 403073771 | ,000             | ,000  |
|                           | 403133102 | ,000             | ,000  |
|                           | 403133106 | ,000             | ,000  |
|                           | 403133107 | ,000             | ,000  |
|                           | 403133109 | 1,000            | ,000  |
|                           | 403133202 | ,000             | 1,000 |
|                           | 403133203 | ,000             | ,000  |
|                           | 403133204 | ,000             | ,000  |
|                           | 403133315 | ,000             | ,000  |
|                           | 403133322 | ,000             | ,000  |
|                           | 403133401 | ,000             | ,000  |
|                           | 403133402 | ,000             | ,000  |
|                           | 403133550 | ,000             | ,000  |
|                           | 403133772 | ,000             | ,000  |
|                           | 403135803 | ,000             | ,000  |
|                           | 404060001 | ,000             | ,000  |
|                           | 404060002 | ,000             | ,000  |

Only

## Categorical Variables Codings

|                           |           | Parameter coding |       |
|---------------------------|-----------|------------------|-------|
|                           |           | (14)             | (15)  |
| VASTY2 (SAIR*10000)+VASTY | 403073101 | ,000             | ,000  |
|                           | 403073102 | ,000             | ,000  |
|                           | 403073103 | ,000             | ,000  |
|                           | 403073202 | ,000             | ,000  |
|                           | 403073203 | ,000             | ,000  |
|                           | 403073204 | ,000             | ,000  |
|                           | 403073303 | ,000             | ,000  |
|                           | 403073651 | ,000             | ,000  |
|                           | 403073771 | ,000             | ,000  |
|                           | 403133102 | ,000             | ,000  |
|                           | 403133106 | ,000             | ,000  |
|                           | 403133107 | ,000             | ,000  |
|                           | 403133109 | ,000             | ,000  |
|                           | 403133202 | ,000             | ,000  |
|                           | 403133203 | 1,000            | ,000  |
|                           | 403133204 | ,000             | 1,000 |
|                           | 403133315 | ,000             | ,000  |
|                           | 403133322 | ,000             | ,000  |
|                           | 403133401 | ,000             | ,000  |
|                           | 403133402 | ,000             | ,000  |
|                           | 403133550 | ,000             | ,000  |
|                           | 403133772 | ,000             | ,000  |
|                           | 403135803 | ,000             | ,000  |
|                           | 404060001 | ,000             | ,000  |
|                           | 404060002 | ,000             | ,000  |

Only

**Categorical Variables Codings**

|                           |           | Parameter coding |       |
|---------------------------|-----------|------------------|-------|
|                           |           | (16)             | (17)  |
| VASTY2 (SAIR*10000)+VASTY | 403073101 | ,000             | ,000  |
|                           | 403073102 | ,000             | ,000  |
|                           | 403073103 | ,000             | ,000  |
|                           | 403073202 | ,000             | ,000  |
|                           | 403073203 | ,000             | ,000  |
|                           | 403073204 | ,000             | ,000  |
|                           | 403073303 | ,000             | ,000  |
|                           | 403073651 | ,000             | ,000  |
|                           | 403073771 | ,000             | ,000  |
|                           | 403133102 | ,000             | ,000  |
|                           | 403133106 | ,000             | ,000  |
|                           | 403133107 | ,000             | ,000  |
|                           | 403133109 | ,000             | ,000  |
|                           | 403133202 | ,000             | ,000  |
|                           | 403133203 | ,000             | ,000  |
|                           | 403133204 | ,000             | ,000  |
|                           | 403133315 | 1,000            | ,000  |
|                           | 403133322 | ,000             | 1,000 |
|                           | 403133401 | ,000             | ,000  |
|                           | 403133402 | ,000             | ,000  |
|                           | 403133550 | ,000             | ,000  |
|                           | 403133772 | ,000             | ,000  |
|                           | 403135803 | ,000             | ,000  |
|                           | 404060001 | ,000             | ,000  |
|                           | 404060002 | ,000             | ,000  |

Only

## Categorical Variables Codings

|                           |           | Parameter coding |       |
|---------------------------|-----------|------------------|-------|
|                           |           | (18)             | (19)  |
| VASTY2 (SAIR*10000)+VASTY | 403073101 | ,000             | ,000  |
|                           | 403073102 | ,000             | ,000  |
|                           | 403073103 | ,000             | ,000  |
|                           | 403073202 | ,000             | ,000  |
|                           | 403073203 | ,000             | ,000  |
|                           | 403073204 | ,000             | ,000  |
|                           | 403073303 | ,000             | ,000  |
|                           | 403073651 | ,000             | ,000  |
|                           | 403073771 | ,000             | ,000  |
|                           | 403133102 | ,000             | ,000  |
|                           | 403133106 | ,000             | ,000  |
|                           | 403133107 | ,000             | ,000  |
|                           | 403133109 | ,000             | ,000  |
|                           | 403133202 | ,000             | ,000  |
|                           | 403133203 | ,000             | ,000  |
|                           | 403133204 | ,000             | ,000  |
|                           | 403133315 | ,000             | ,000  |
|                           | 403133322 | ,000             | ,000  |
|                           | 403133401 | 1,000            | ,000  |
|                           | 403133402 | ,000             | 1,000 |
|                           | 403133550 | ,000             | ,000  |
|                           | 403133772 | ,000             | ,000  |
|                           | 403135803 | ,000             | ,000  |
|                           | 404060001 | ,000             | ,000  |
|                           | 404060002 | ,000             | ,000  |

Only



**Categorical Variables Codings**

|                           |           | Parameter coding |       |
|---------------------------|-----------|------------------|-------|
|                           |           | (20)             | (21)  |
| VASTY2 (SAIR*10000)+VASTY | 403073101 | ,000             | ,000  |
|                           | 403073102 | ,000             | ,000  |
|                           | 403073103 | ,000             | ,000  |
|                           | 403073202 | ,000             | ,000  |
|                           | 403073203 | ,000             | ,000  |
|                           | 403073204 | ,000             | ,000  |
|                           | 403073303 | ,000             | ,000  |
|                           | 403073651 | ,000             | ,000  |
|                           | 403073771 | ,000             | ,000  |
|                           | 403133102 | ,000             | ,000  |
|                           | 403133106 | ,000             | ,000  |
|                           | 403133107 | ,000             | ,000  |
|                           | 403133109 | ,000             | ,000  |
|                           | 403133202 | ,000             | ,000  |
|                           | 403133203 | ,000             | ,000  |
|                           | 403133204 | ,000             | ,000  |
|                           | 403133315 | ,000             | ,000  |
|                           | 403133322 | ,000             | ,000  |
|                           | 403133401 | ,000             | ,000  |
|                           | 403133402 | ,000             | ,000  |
|                           | 403133550 | 1,000            | ,000  |
|                           | 403133772 | ,000             | 1,000 |
|                           | 403135803 | ,000             | ,000  |
|                           | 404060001 | ,000             | ,000  |
|                           | 404060002 | ,000             | ,000  |

Only

## Categorical Variables Codings

|                           |           | Parameter coding |       |
|---------------------------|-----------|------------------|-------|
|                           |           | (22)             | (23)  |
| VASTY2 (SAIR*10000)+VASTY | 403073101 | ,000             | ,000  |
|                           | 403073102 | ,000             | ,000  |
|                           | 403073103 | ,000             | ,000  |
|                           | 403073202 | ,000             | ,000  |
|                           | 403073203 | ,000             | ,000  |
|                           | 403073204 | ,000             | ,000  |
|                           | 403073303 | ,000             | ,000  |
|                           | 403073651 | ,000             | ,000  |
|                           | 403073771 | ,000             | ,000  |
|                           | 403133102 | ,000             | ,000  |
|                           | 403133106 | ,000             | ,000  |
|                           | 403133107 | ,000             | ,000  |
|                           | 403133109 | ,000             | ,000  |
|                           | 403133202 | ,000             | ,000  |
|                           | 403133203 | ,000             | ,000  |
|                           | 403133204 | ,000             | ,000  |
|                           | 403133315 | ,000             | ,000  |
|                           | 403133322 | ,000             | ,000  |
|                           | 403133401 | ,000             | ,000  |
|                           | 403133402 | ,000             | ,000  |
|                           | 403133550 | ,000             | ,000  |
|                           | 403133772 | ,000             | ,000  |
|                           | 403135803 | 1,000            | ,000  |
|                           | 404060001 | ,000             | 1,000 |
|                           | 404060002 | ,000             | ,000  |

Only

1  
2  
3  
4  
5  
6  
7  
8  
9  
10  
11  
12  
13  
14  
15  
16  
17  
18  
19  
20  
21  
22  
23  
24  
25  
26  
27  
28  
29  
30  
31  
32  
33  
34  
35  
36  
37  
38  
39  
40  
41  
42  
43  
44  
45  
46  
47  
48  
49  
50  
51  
52  
53  
54  
55  
56  
57  
58  
59  
60

**Categorical Variables Codings**

|                           |           | Parameter coding |      |
|---------------------------|-----------|------------------|------|
|                           |           | (24)             | (25) |
| VASTY2 (SAIR*10000)+VASTY | 403073101 | ,000             | ,000 |
|                           | 403073102 | ,000             | ,000 |
|                           | 403073103 | ,000             | ,000 |
|                           | 403073202 | ,000             | ,000 |
|                           | 403073203 | ,000             | ,000 |
|                           | 403073204 | ,000             | ,000 |
|                           | 403073303 | ,000             | ,000 |
|                           | 403073651 | ,000             | ,000 |
|                           | 403073771 | ,000             | ,000 |
|                           | 403133102 | ,000             | ,000 |
|                           | 403133106 | ,000             | ,000 |
|                           | 403133107 | ,000             | ,000 |
|                           | 403133109 | ,000             | ,000 |
|                           | 403133202 | ,000             | ,000 |
|                           | 403133203 | ,000             | ,000 |
|                           | 403133204 | ,000             | ,000 |
|                           | 403133315 | ,000             | ,000 |
|                           | 403133322 | ,000             | ,000 |
|                           | 403133401 | ,000             | ,000 |
|                           | 403133402 | ,000             | ,000 |
|                           | 403133550 | ,000             | ,000 |
|                           | 403133772 | ,000             | ,000 |
|                           | 403135803 | ,000             | ,000 |
|                           | 404060001 | ,000             | ,000 |
|                           | 404060002 | 1,000            | ,000 |

Only

## Categorical Variables Codings

|                           |           | Parameter coding |      |
|---------------------------|-----------|------------------|------|
|                           |           | (26)             | (27) |
| VASTY2 (SAIR*10000)+VASTY | 403073101 | ,000             | ,000 |
|                           | 403073102 | ,000             | ,000 |
|                           | 403073103 | ,000             | ,000 |
|                           | 403073202 | ,000             | ,000 |
|                           | 403073203 | ,000             | ,000 |
|                           | 403073204 | ,000             | ,000 |
|                           | 403073303 | ,000             | ,000 |
|                           | 403073651 | ,000             | ,000 |
|                           | 403073771 | ,000             | ,000 |
|                           | 403133102 | ,000             | ,000 |
|                           | 403133106 | ,000             | ,000 |
|                           | 403133107 | ,000             | ,000 |
|                           | 403133109 | ,000             | ,000 |
|                           | 403133202 | ,000             | ,000 |
|                           | 403133203 | ,000             | ,000 |
|                           | 403133204 | ,000             | ,000 |
|                           | 403133315 | ,000             | ,000 |
|                           | 403133322 | ,000             | ,000 |
|                           | 403133401 | ,000             | ,000 |
|                           | 403133402 | ,000             | ,000 |
|                           | 403133550 | ,000             | ,000 |
|                           | 403133772 | ,000             | ,000 |
|                           | 403135803 | ,000             | ,000 |
|                           | 404060001 | ,000             | ,000 |
|                           | 404060002 | ,000             | ,000 |

Only

1  
2  
3  
4  
5  
6  
7  
8  
9  
10  
11  
12  
13  
14  
15  
16  
17  
18  
19  
20  
21  
22  
23  
24  
25  
26  
27  
28  
29  
30  
31  
32  
33  
34  
35  
36  
37  
38  
39  
40  
41  
42  
43  
44  
45  
46  
47  
48  
49  
50  
51  
52  
53  
54  
55  
56  
57  
58  
59  
60

**Categorical Variables Codings**

|                           |           | Parameter coding |      |
|---------------------------|-----------|------------------|------|
|                           |           | (28)             | (29) |
| VASTY2 (SAIR*10000)+VASTY | 403073101 | ,000             | ,000 |
|                           | 403073102 | ,000             | ,000 |
|                           | 403073103 | ,000             | ,000 |
|                           | 403073202 | ,000             | ,000 |
|                           | 403073203 | ,000             | ,000 |
|                           | 403073204 | ,000             | ,000 |
|                           | 403073303 | ,000             | ,000 |
|                           | 403073651 | ,000             | ,000 |
|                           | 403073771 | ,000             | ,000 |
|                           | 403133102 | ,000             | ,000 |
|                           | 403133106 | ,000             | ,000 |
|                           | 403133107 | ,000             | ,000 |
|                           | 403133109 | ,000             | ,000 |
|                           | 403133202 | ,000             | ,000 |
|                           | 403133203 | ,000             | ,000 |
|                           | 403133204 | ,000             | ,000 |
|                           | 403133315 | ,000             | ,000 |
|                           | 403133322 | ,000             | ,000 |
|                           | 403133401 | ,000             | ,000 |
|                           | 403133402 | ,000             | ,000 |
|                           | 403133550 | ,000             | ,000 |
|                           | 403133772 | ,000             | ,000 |
|                           | 403135803 | ,000             | ,000 |
|                           | 404060001 | ,000             | ,000 |
|                           | 404060002 | ,000             | ,000 |

Only

## Categorical Variables Codings

|                           |           | Parameter coding |      |
|---------------------------|-----------|------------------|------|
|                           |           | (30)             | (31) |
| VASTY2 (SAIR*10000)+VASTY | 403073101 | ,000             | ,000 |
|                           | 403073102 | ,000             | ,000 |
|                           | 403073103 | ,000             | ,000 |
|                           | 403073202 | ,000             | ,000 |
|                           | 403073203 | ,000             | ,000 |
|                           | 403073204 | ,000             | ,000 |
|                           | 403073303 | ,000             | ,000 |
|                           | 403073651 | ,000             | ,000 |
|                           | 403073771 | ,000             | ,000 |
|                           | 403133102 | ,000             | ,000 |
|                           | 403133106 | ,000             | ,000 |
|                           | 403133107 | ,000             | ,000 |
|                           | 403133109 | ,000             | ,000 |
|                           | 403133202 | ,000             | ,000 |
|                           | 403133203 | ,000             | ,000 |
|                           | 403133204 | ,000             | ,000 |
|                           | 403133315 | ,000             | ,000 |
|                           | 403133322 | ,000             | ,000 |
|                           | 403133401 | ,000             | ,000 |
|                           | 403133402 | ,000             | ,000 |
|                           | 403133550 | ,000             | ,000 |
|                           | 403133772 | ,000             | ,000 |
|                           | 403135803 | ,000             | ,000 |
|                           | 404060001 | ,000             | ,000 |
|                           | 404060002 | ,000             | ,000 |

Only

1  
2  
3  
4  
5  
6  
7  
8  
9  
10  
11  
12  
13  
14  
15  
16  
17  
18  
19  
20  
21  
22  
23  
24  
25  
26  
27  
28  
29  
30  
31  
32  
33  
34  
35  
36  
37  
38  
39  
40  
41  
42  
43  
44  
45  
46  
47  
48  
49  
50  
51  
52  
53  
54  
55  
56  
57  
58  
59  
60

**Categorical Variables Codings**

|                           |           | Parameter coding |      |
|---------------------------|-----------|------------------|------|
|                           |           | (32)             | (33) |
| VASTY2 (SAIR*10000)+VASTY | 403073101 | ,000             | ,000 |
|                           | 403073102 | ,000             | ,000 |
|                           | 403073103 | ,000             | ,000 |
|                           | 403073202 | ,000             | ,000 |
|                           | 403073203 | ,000             | ,000 |
|                           | 403073204 | ,000             | ,000 |
|                           | 403073303 | ,000             | ,000 |
|                           | 403073651 | ,000             | ,000 |
|                           | 403073771 | ,000             | ,000 |
|                           | 403133102 | ,000             | ,000 |
|                           | 403133106 | ,000             | ,000 |
|                           | 403133107 | ,000             | ,000 |
|                           | 403133109 | ,000             | ,000 |
|                           | 403133202 | ,000             | ,000 |
|                           | 403133203 | ,000             | ,000 |
|                           | 403133204 | ,000             | ,000 |
|                           | 403133315 | ,000             | ,000 |
|                           | 403133322 | ,000             | ,000 |
|                           | 403133401 | ,000             | ,000 |
|                           | 403133402 | ,000             | ,000 |
|                           | 403133550 | ,000             | ,000 |
|                           | 403133772 | ,000             | ,000 |
|                           | 403135803 | ,000             | ,000 |
|                           | 404060001 | ,000             | ,000 |
|                           | 404060002 | ,000             | ,000 |

Only

## Categorical Variables Codings

|                           |           | Parameter coding |      |
|---------------------------|-----------|------------------|------|
|                           |           | (34)             | (35) |
| VASTY2 (SAIR*10000)+VASTY | 403073101 | ,000             | ,000 |
|                           | 403073102 | ,000             | ,000 |
|                           | 403073103 | ,000             | ,000 |
|                           | 403073202 | ,000             | ,000 |
|                           | 403073203 | ,000             | ,000 |
|                           | 403073204 | ,000             | ,000 |
|                           | 403073303 | ,000             | ,000 |
|                           | 403073651 | ,000             | ,000 |
|                           | 403073771 | ,000             | ,000 |
|                           | 403133102 | ,000             | ,000 |
|                           | 403133106 | ,000             | ,000 |
|                           | 403133107 | ,000             | ,000 |
|                           | 403133109 | ,000             | ,000 |
|                           | 403133202 | ,000             | ,000 |
|                           | 403133203 | ,000             | ,000 |
|                           | 403133204 | ,000             | ,000 |
|                           | 403133315 | ,000             | ,000 |
|                           | 403133322 | ,000             | ,000 |
|                           | 403133401 | ,000             | ,000 |
|                           | 403133402 | ,000             | ,000 |
|                           | 403133550 | ,000             | ,000 |
|                           | 403133772 | ,000             | ,000 |
|                           | 403135803 | ,000             | ,000 |
|                           | 404060001 | ,000             | ,000 |
|                           | 404060002 | ,000             | ,000 |

Only



## Categorical Variables Codings

|                           |                                         | Frequency | Parameter<br>(1) |
|---------------------------|-----------------------------------------|-----------|------------------|
|                           | 404310003                               | 291       | ,000             |
|                           | 404310004                               | 291       | ,000             |
|                           | 502300005                               | 366       | ,000             |
|                           | 502300006                               | 225       | ,000             |
|                           | 502300007                               | 366       | ,000             |
|                           | 502300214                               | 366       | ,000             |
|                           | 502300411                               | 366       | ,000             |
|                           | 502300415                               | 360       | ,000             |
|                           | 502300416                               | 363       | ,000             |
|                           | 502300811                               | 364       | ,000             |
|                           | 502300913                               | 315       | ,000             |
| weekday veckodag          | 1 måndag                                | 1805      | ,000             |
|                           | 2 tisdag                                | 1812      | 1,000            |
|                           | 3 onsdag                                | 1800      | ,000             |
|                           | 4 torsdag                               | 1794      | ,000             |
|                           | 5 fredag                                | 1788      | ,000             |
|                           | 6 lördag                                | 1735      | ,000             |
|                           | 7 söndag                                | 1741      | ,000             |
| season säsong/period      | 1 januari-mars                          | 3182      | ,000             |
|                           | 2 april-maj                             | 2127      | 1,000            |
|                           | 3 juni-augusti                          | 2911      | ,000             |
|                           | 4 september-oktober                     | 2144      | ,000             |
|                           | 5 november-december                     | 2111      | ,000             |
| bv1 belastning vs paoncil | 1 medelbelastning                       | 5380      | ,000             |
|                           | 2 underbelastning                       | 3222      | 1,000            |
|                           | 3 överbelastning                        | 3873      | ,000             |
| holiday större helg       | 1 ingen större helg                     | 12078     | ,000             |
|                           | 2 större helg (påsk/midsommar/julonyår) | 397       | 1,000            |

## Categorical Variables Codings

|                           |                                         | Parameter coding |       |
|---------------------------|-----------------------------------------|------------------|-------|
|                           |                                         | (2)              | (3)   |
|                           | 404310003                               | ,000             | ,000  |
|                           | 404310004                               | ,000             | ,000  |
|                           | 502300005                               | ,000             | ,000  |
|                           | 502300006                               | ,000             | ,000  |
|                           | 502300007                               | ,000             | ,000  |
|                           | 502300214                               | ,000             | ,000  |
|                           | 502300411                               | ,000             | ,000  |
|                           | 502300415                               | ,000             | ,000  |
|                           | 502300416                               | ,000             | ,000  |
|                           | 502300811                               | ,000             | ,000  |
|                           | 502300913                               | ,000             | ,000  |
| weekday veckodag          | 1 måndag                                | ,000             | ,000  |
|                           | 2 tisdag                                | ,000             | ,000  |
|                           | 3 onsdag                                | 1,000            | ,000  |
|                           | 4 torsdag                               | ,000             | 1,000 |
|                           | 5 fredag                                | ,000             | ,000  |
|                           | 6 lördag                                | ,000             | ,000  |
|                           | 7 söndag                                | ,000             | ,000  |
| season säsong/period      | 1 januari-mars                          | ,000             | ,000  |
|                           | 2 april-maj                             | ,000             | ,000  |
|                           | 3 juni-augusti                          | 1,000            | ,000  |
|                           | 4 september-oktober                     | ,000             | 1,000 |
|                           | 5 november-december                     | ,000             | ,000  |
| bv1 belastning vs paoncil | 1 medelbelastning                       | ,000             |       |
|                           | 2 underbelastning                       | ,000             |       |
|                           | 3 överbelastning                        | 1,000            |       |
| holiday större helg       | 1 ingen större helg                     |                  |       |
|                           | 2 större helg (påsk/midsommar/julonyår) |                  |       |

## Categorical Variables Codings

|                           |                                         | Parameter coding |       |
|---------------------------|-----------------------------------------|------------------|-------|
|                           |                                         | (4)              | (5)   |
|                           | 404310003                               | ,000             | ,000  |
|                           | 404310004                               | ,000             | ,000  |
|                           | 502300005                               | ,000             | ,000  |
|                           | 502300006                               | ,000             | ,000  |
|                           | 502300007                               | ,000             | ,000  |
|                           | 502300214                               | ,000             | ,000  |
|                           | 502300411                               | ,000             | ,000  |
|                           | 502300415                               | ,000             | ,000  |
|                           | 502300416                               | ,000             | ,000  |
|                           | 502300811                               | ,000             | ,000  |
|                           | 502300913                               | ,000             | ,000  |
| weekday veckodag          | 1 måndag                                | ,000             | ,000  |
|                           | 2 tisdag                                | ,000             | ,000  |
|                           | 3 onsdag                                | ,000             | ,000  |
|                           | 4 torsdag                               | ,000             | ,000  |
|                           | 5 fredag                                | 1,000            | ,000  |
|                           | 6 lördag                                | ,000             | 1,000 |
|                           | 7 söndag                                | ,000             | ,000  |
| season säsong/period      | 1 januari-mars                          | ,000             |       |
|                           | 2 april-maj                             | ,000             |       |
|                           | 3 juni-augusti                          | ,000             |       |
|                           | 4 september-oktober                     | ,000             |       |
|                           | 5 november-december                     | 1,000            |       |
| bv1 belastning vs paoncil | 1 medelbelastning                       |                  |       |
|                           | 2 underbelastning                       |                  |       |
|                           | 3 överbelastning                        |                  |       |
| holiday större helg       | 1 ingen större helg                     |                  |       |
|                           | 2 större helg (påsk/midsommar/julonyår) |                  |       |

## Categorical Variables Codings

|                           |                                         | Parameter coding |      |
|---------------------------|-----------------------------------------|------------------|------|
|                           |                                         | (6)              | (7)  |
|                           | 404310003                               | ,000             | ,000 |
|                           | 404310004                               | ,000             | ,000 |
|                           | 502300005                               | ,000             | ,000 |
|                           | 502300006                               | ,000             | ,000 |
|                           | 502300007                               | ,000             | ,000 |
|                           | 502300214                               | ,000             | ,000 |
|                           | 502300411                               | ,000             | ,000 |
|                           | 502300415                               | ,000             | ,000 |
|                           | 502300416                               | ,000             | ,000 |
|                           | 502300811                               | ,000             | ,000 |
|                           | 502300913                               | ,000             | ,000 |
| weekday veckodag          | 1 måndag                                | ,000             |      |
|                           | 2 tisdag                                | ,000             |      |
|                           | 3 onsdag                                | ,000             |      |
|                           | 4 torsdag                               | ,000             |      |
|                           | 5 fredag                                | ,000             |      |
|                           | 6 lördag                                | ,000             |      |
|                           | 7 söndag                                | 1,000            |      |
| season säsong/period      | 1 januari-mars                          |                  |      |
|                           | 2 april-maj                             |                  |      |
|                           | 3 juni-augusti                          |                  |      |
|                           | 4 september-oktober                     |                  |      |
|                           | 5 november-december                     |                  |      |
| bv1 belastning vs paoncil | 1 medelbelastning                       |                  |      |
|                           | 2 underbelastning                       |                  |      |
|                           | 3 överbelastning                        |                  |      |
| holiday större helg       | 1 ingen större helg                     |                  |      |
|                           | 2 större helg (påsk/midsommar/julonyår) |                  |      |

## Categorical Variables Codings

|                           |                                         | Parameter coding |      |
|---------------------------|-----------------------------------------|------------------|------|
|                           |                                         | (8)              | (9)  |
|                           | 404310003                               | ,000             | ,000 |
|                           | 404310004                               | ,000             | ,000 |
|                           | 502300005                               | ,000             | ,000 |
|                           | 502300006                               | ,000             | ,000 |
|                           | 502300007                               | ,000             | ,000 |
|                           | 502300214                               | ,000             | ,000 |
|                           | 502300411                               | ,000             | ,000 |
|                           | 502300415                               | ,000             | ,000 |
|                           | 502300416                               | ,000             | ,000 |
|                           | 502300811                               | ,000             | ,000 |
|                           | 502300913                               | ,000             | ,000 |
| weekday veckodag          | 1 måndag                                |                  |      |
|                           | 2 tisdag                                |                  |      |
|                           | 3 onsdag                                |                  |      |
|                           | 4 torsdag                               |                  |      |
|                           | 5 fredag                                |                  |      |
|                           | 6 lördag                                |                  |      |
|                           | 7 söndag                                |                  |      |
| season säsong/period      | 1 januari-mars                          |                  |      |
|                           | 2 april-maj                             |                  |      |
|                           | 3 juni-augusti                          |                  |      |
|                           | 4 september-oktober                     |                  |      |
|                           | 5 november-december                     |                  |      |
| bv1 belastning vs paoncil | 1 medelbelastning                       |                  |      |
|                           | 2 underbelastning                       |                  |      |
|                           | 3 överbelastning                        |                  |      |
| holiday större helg       | 1 ingen större helg                     |                  |      |
|                           | 2 större helg (påsk/midsommar/julonyår) |                  |      |

## Categorical Variables Codings

|                           |                                         | Parameter coding |      |
|---------------------------|-----------------------------------------|------------------|------|
|                           |                                         | (10)             | (11) |
|                           | 404310003                               | ,000             | ,000 |
|                           | 404310004                               | ,000             | ,000 |
|                           | 502300005                               | ,000             | ,000 |
|                           | 502300006                               | ,000             | ,000 |
|                           | 502300007                               | ,000             | ,000 |
|                           | 502300214                               | ,000             | ,000 |
|                           | 502300411                               | ,000             | ,000 |
|                           | 502300415                               | ,000             | ,000 |
|                           | 502300416                               | ,000             | ,000 |
|                           | 502300811                               | ,000             | ,000 |
|                           | 502300913                               | ,000             | ,000 |
| weekday veckodag          | 1 måndag                                |                  |      |
|                           | 2 tisdag                                |                  |      |
|                           | 3 onsdag                                |                  |      |
|                           | 4 torsdag                               |                  |      |
|                           | 5 fredag                                |                  |      |
|                           | 6 lördag                                |                  |      |
|                           | 7 söndag                                |                  |      |
| season säsong/period      | 1 januari-mars                          |                  |      |
|                           | 2 april-maj                             |                  |      |
|                           | 3 juni-augusti                          |                  |      |
|                           | 4 september-oktober                     |                  |      |
|                           | 5 november-december                     |                  |      |
| bv1 belastning vs paoncil | 1 medelbelastning                       |                  |      |
|                           | 2 underbelastning                       |                  |      |
|                           | 3 överbelastning                        |                  |      |
| holiday större helg       | 1 ingen större helg                     |                  |      |
|                           | 2 större helg (påsk/midsommar/julonyår) |                  |      |

## Categorical Variables Codings

|                           |                                         | Parameter coding |      |
|---------------------------|-----------------------------------------|------------------|------|
|                           |                                         | (12)             | (13) |
|                           | 404310003                               | ,000             | ,000 |
|                           | 404310004                               | ,000             | ,000 |
|                           | 502300005                               | ,000             | ,000 |
|                           | 502300006                               | ,000             | ,000 |
|                           | 502300007                               | ,000             | ,000 |
|                           | 502300214                               | ,000             | ,000 |
|                           | 502300411                               | ,000             | ,000 |
|                           | 502300415                               | ,000             | ,000 |
|                           | 502300416                               | ,000             | ,000 |
|                           | 502300811                               | ,000             | ,000 |
|                           | 502300913                               | ,000             | ,000 |
| weekday veckodag          | 1 måndag                                |                  |      |
|                           | 2 tisdag                                |                  |      |
|                           | 3 onsdag                                |                  |      |
|                           | 4 torsdag                               |                  |      |
|                           | 5 fredag                                |                  |      |
|                           | 6 lördag                                |                  |      |
|                           | 7 söndag                                |                  |      |
| season säsong/period      | 1 januari-mars                          |                  |      |
|                           | 2 april-maj                             |                  |      |
|                           | 3 juni-augusti                          |                  |      |
|                           | 4 september-oktober                     |                  |      |
|                           | 5 november-december                     |                  |      |
| bv1 belastning vs paoncil | 1 medelbelastning                       |                  |      |
|                           | 2 underbelastning                       |                  |      |
|                           | 3 överbelastning                        |                  |      |
| holiday större helg       | 1 ingen större helg                     |                  |      |
|                           | 2 större helg (påsk/midsommar/julonyår) |                  |      |

## Categorical Variables Codings

|                           |                                         | Parameter coding |      |
|---------------------------|-----------------------------------------|------------------|------|
|                           |                                         | (14)             | (15) |
|                           | 404310003                               | ,000             | ,000 |
|                           | 404310004                               | ,000             | ,000 |
|                           | 502300005                               | ,000             | ,000 |
|                           | 502300006                               | ,000             | ,000 |
|                           | 502300007                               | ,000             | ,000 |
|                           | 502300214                               | ,000             | ,000 |
|                           | 502300411                               | ,000             | ,000 |
|                           | 502300415                               | ,000             | ,000 |
|                           | 502300416                               | ,000             | ,000 |
|                           | 502300811                               | ,000             | ,000 |
|                           | 502300913                               | ,000             | ,000 |
| weekday veckodag          | 1 måndag                                |                  |      |
|                           | 2 tisdag                                |                  |      |
|                           | 3 onsdag                                |                  |      |
|                           | 4 torsdag                               |                  |      |
|                           | 5 fredag                                |                  |      |
|                           | 6 lördag                                |                  |      |
|                           | 7 söndag                                |                  |      |
| season säsong/period      | 1 januari-mars                          |                  |      |
|                           | 2 april-maj                             |                  |      |
|                           | 3 juni-augusti                          |                  |      |
|                           | 4 september-oktober                     |                  |      |
|                           | 5 november-december                     |                  |      |
| bv1 belastning vs paoncil | 1 medelbelastning                       |                  |      |
|                           | 2 underbelastning                       |                  |      |
|                           | 3 överbelastning                        |                  |      |
| holiday större helg       | 1 ingen större helg                     |                  |      |
|                           | 2 större helg (påsk/midsommar/julonyår) |                  |      |



## Categorical Variables Codings

|                           |                                         | Parameter coding |      |
|---------------------------|-----------------------------------------|------------------|------|
|                           |                                         | (16)             | (17) |
|                           | 404310003                               | ,000             | ,000 |
|                           | 404310004                               | ,000             | ,000 |
|                           | 502300005                               | ,000             | ,000 |
|                           | 502300006                               | ,000             | ,000 |
|                           | 502300007                               | ,000             | ,000 |
|                           | 502300214                               | ,000             | ,000 |
|                           | 502300411                               | ,000             | ,000 |
|                           | 502300415                               | ,000             | ,000 |
|                           | 502300416                               | ,000             | ,000 |
|                           | 502300811                               | ,000             | ,000 |
|                           | 502300913                               | ,000             | ,000 |
| weekday veckodag          | 1 måndag                                |                  |      |
|                           | 2 tisdag                                |                  |      |
|                           | 3 onsdag                                |                  |      |
|                           | 4 torsdag                               |                  |      |
|                           | 5 fredag                                |                  |      |
|                           | 6 lördag                                |                  |      |
|                           | 7 söndag                                |                  |      |
| season säsong/period      | 1 januari-mars                          |                  |      |
|                           | 2 april-maj                             |                  |      |
|                           | 3 juni-augusti                          |                  |      |
|                           | 4 september-oktober                     |                  |      |
|                           | 5 november-december                     |                  |      |
| bv1 belastning vs paoncil | 1 medelbelastning                       |                  |      |
|                           | 2 underbelastning                       |                  |      |
|                           | 3 överbelastning                        |                  |      |
| holiday större helg       | 1 ingen större helg                     |                  |      |
|                           | 2 större helg (påsk/midsommar/julonyår) |                  |      |

## Categorical Variables Codings

|                           |                                         | Parameter coding |      |
|---------------------------|-----------------------------------------|------------------|------|
|                           |                                         | (18)             | (19) |
|                           | 404310003                               | ,000             | ,000 |
|                           | 404310004                               | ,000             | ,000 |
|                           | 502300005                               | ,000             | ,000 |
|                           | 502300006                               | ,000             | ,000 |
|                           | 502300007                               | ,000             | ,000 |
|                           | 502300214                               | ,000             | ,000 |
|                           | 502300411                               | ,000             | ,000 |
|                           | 502300415                               | ,000             | ,000 |
|                           | 502300416                               | ,000             | ,000 |
|                           | 502300811                               | ,000             | ,000 |
|                           | 502300913                               | ,000             | ,000 |
| weekday veckodag          | 1 måndag                                |                  |      |
|                           | 2 tisdag                                |                  |      |
|                           | 3 onsdag                                |                  |      |
|                           | 4 torsdag                               |                  |      |
|                           | 5 fredag                                |                  |      |
|                           | 6 lördag                                |                  |      |
|                           | 7 söndag                                |                  |      |
| season säsong/period      | 1 januari-mars                          |                  |      |
|                           | 2 april-maj                             |                  |      |
|                           | 3 juni-augusti                          |                  |      |
|                           | 4 september-oktober                     |                  |      |
|                           | 5 november-december                     |                  |      |
| bv1 belastning vs paoncil | 1 medelbelastning                       |                  |      |
|                           | 2 underbelastning                       |                  |      |
|                           | 3 överbelastning                        |                  |      |
| holiday större helg       | 1 ingen större helg                     |                  |      |
|                           | 2 större helg (påsk/midsommar/julonyår) |                  |      |

## Categorical Variables Codings

|                           |                                         | Parameter coding |      |
|---------------------------|-----------------------------------------|------------------|------|
|                           |                                         | (20)             | (21) |
|                           | 404310003                               | ,000             | ,000 |
|                           | 404310004                               | ,000             | ,000 |
|                           | 502300005                               | ,000             | ,000 |
|                           | 502300006                               | ,000             | ,000 |
|                           | 502300007                               | ,000             | ,000 |
|                           | 502300214                               | ,000             | ,000 |
|                           | 502300411                               | ,000             | ,000 |
|                           | 502300415                               | ,000             | ,000 |
|                           | 502300416                               | ,000             | ,000 |
|                           | 502300811                               | ,000             | ,000 |
|                           | 502300913                               | ,000             | ,000 |
| weekday veckodag          | 1 måndag                                |                  |      |
|                           | 2 tisdag                                |                  |      |
|                           | 3 onsdag                                |                  |      |
|                           | 4 torsdag                               |                  |      |
|                           | 5 fredag                                |                  |      |
|                           | 6 lördag                                |                  |      |
|                           | 7 söndag                                |                  |      |
| season säsong/period      | 1 januari-mars                          |                  |      |
|                           | 2 april-maj                             |                  |      |
|                           | 3 juni-augusti                          |                  |      |
|                           | 4 september-oktober                     |                  |      |
|                           | 5 november-december                     |                  |      |
| bv1 belastning vs paoncil | 1 medelbelastning                       |                  |      |
|                           | 2 underbelastning                       |                  |      |
|                           | 3 överbelastning                        |                  |      |
| holiday större helg       | 1 ingen större helg                     |                  |      |
|                           | 2 större helg (påsk/midsommar/julonyår) |                  |      |

## Categorical Variables Codings

|                           |                                         | Parameter coding |      |
|---------------------------|-----------------------------------------|------------------|------|
|                           |                                         | (22)             | (23) |
|                           | 404310003                               | ,000             | ,000 |
|                           | 404310004                               | ,000             | ,000 |
|                           | 502300005                               | ,000             | ,000 |
|                           | 502300006                               | ,000             | ,000 |
|                           | 502300007                               | ,000             | ,000 |
|                           | 502300214                               | ,000             | ,000 |
|                           | 502300411                               | ,000             | ,000 |
|                           | 502300415                               | ,000             | ,000 |
|                           | 502300416                               | ,000             | ,000 |
|                           | 502300811                               | ,000             | ,000 |
|                           | 502300913                               | ,000             | ,000 |
| weekday veckodag          | 1 måndag                                |                  |      |
|                           | 2 tisdag                                |                  |      |
|                           | 3 onsdag                                |                  |      |
|                           | 4 torsdag                               |                  |      |
|                           | 5 fredag                                |                  |      |
|                           | 6 lördag                                |                  |      |
|                           | 7 söndag                                |                  |      |
| season säsong/period      | 1 januari-mars                          |                  |      |
|                           | 2 april-maj                             |                  |      |
|                           | 3 juni-augusti                          |                  |      |
|                           | 4 september-oktober                     |                  |      |
|                           | 5 november-december                     |                  |      |
| bv1 belastning vs paoncil | 1 medelbelastning                       |                  |      |
|                           | 2 underbelastning                       |                  |      |
|                           | 3 överbelastning                        |                  |      |
| holiday större helg       | 1 ingen större helg                     |                  |      |
|                           | 2 större helg (påsk/midsommar/julonyår) |                  |      |

## Categorical Variables Codings

|                           |                                         | Parameter coding |       |
|---------------------------|-----------------------------------------|------------------|-------|
|                           |                                         | (24)             | (25)  |
|                           | 404310003                               | ,000             | 1,000 |
|                           | 404310004                               | ,000             | ,000  |
|                           | 502300005                               | ,000             | ,000  |
|                           | 502300006                               | ,000             | ,000  |
|                           | 502300007                               | ,000             | ,000  |
|                           | 502300214                               | ,000             | ,000  |
|                           | 502300411                               | ,000             | ,000  |
|                           | 502300415                               | ,000             | ,000  |
|                           | 502300416                               | ,000             | ,000  |
|                           | 502300811                               | ,000             | ,000  |
|                           | 502300913                               | ,000             | ,000  |
| weekday veckodag          | 1 måndag                                |                  |       |
|                           | 2 tisdag                                |                  |       |
|                           | 3 onsdag                                |                  |       |
|                           | 4 torsdag                               |                  |       |
|                           | 5 fredag                                |                  |       |
|                           | 6 lördag                                |                  |       |
|                           | 7 söndag                                |                  |       |
| season säsong/period      | 1 januari-mars                          |                  |       |
|                           | 2 april-maj                             |                  |       |
|                           | 3 juni-augusti                          |                  |       |
|                           | 4 september-oktober                     |                  |       |
|                           | 5 november-december                     |                  |       |
| bv1 belastning vs paoncil | 1 medelbelastning                       |                  |       |
|                           | 2 underbelastning                       |                  |       |
|                           | 3 överbelastning                        |                  |       |
| holiday större helg       | 1 ingen större helg                     |                  |       |
|                           | 2 större helg (påsk/midsommar/julonyår) |                  |       |

## Categorical Variables Codings

|                           |                                         | Parameter coding |       |
|---------------------------|-----------------------------------------|------------------|-------|
|                           |                                         | (26)             | (27)  |
|                           | 404310003                               | ,000             | ,000  |
|                           | 404310004                               | 1,000            | ,000  |
|                           | 502300005                               | ,000             | 1,000 |
|                           | 502300006                               | ,000             | ,000  |
|                           | 502300007                               | ,000             | ,000  |
|                           | 502300214                               | ,000             | ,000  |
|                           | 502300411                               | ,000             | ,000  |
|                           | 502300415                               | ,000             | ,000  |
|                           | 502300416                               | ,000             | ,000  |
|                           | 502300811                               | ,000             | ,000  |
|                           | 502300913                               | ,000             | ,000  |
| weekday veckodag          | 1 måndag                                |                  |       |
|                           | 2 tisdag                                |                  |       |
|                           | 3 onsdag                                |                  |       |
|                           | 4 torsdag                               |                  |       |
|                           | 5 fredag                                |                  |       |
|                           | 6 lördag                                |                  |       |
|                           | 7 söndag                                |                  |       |
| season säsong/period      | 1 januari-mars                          |                  |       |
|                           | 2 april-maj                             |                  |       |
|                           | 3 juni-augusti                          |                  |       |
|                           | 4 september-oktober                     |                  |       |
|                           | 5 november-december                     |                  |       |
| bv1 belastning vs paoncil | 1 medelbelastning                       |                  |       |
|                           | 2 underbelastning                       |                  |       |
|                           | 3 överbelastning                        |                  |       |
| holiday större helg       | 1 ingen större helg                     |                  |       |
|                           | 2 större helg (påsk/midsommar/julonyår) |                  |       |

## Categorical Variables Codings

|                           |                                         | Parameter coding |       |
|---------------------------|-----------------------------------------|------------------|-------|
|                           |                                         | (28)             | (29)  |
|                           | 404310003                               | ,000             | ,000  |
|                           | 404310004                               | ,000             | ,000  |
|                           | 502300005                               | ,000             | ,000  |
|                           | 502300006                               | 1,000            | ,000  |
|                           | 502300007                               | ,000             | 1,000 |
|                           | 502300214                               | ,000             | ,000  |
|                           | 502300411                               | ,000             | ,000  |
|                           | 502300415                               | ,000             | ,000  |
|                           | 502300416                               | ,000             | ,000  |
|                           | 502300811                               | ,000             | ,000  |
|                           | 502300913                               | ,000             | ,000  |
| weekday veckodag          | 1 måndag                                |                  |       |
|                           | 2 tisdag                                |                  |       |
|                           | 3 onsdag                                |                  |       |
|                           | 4 torsdag                               |                  |       |
|                           | 5 fredag                                |                  |       |
|                           | 6 lördag                                |                  |       |
|                           | 7 söndag                                |                  |       |
| season säsong/period      | 1 januari-mars                          |                  |       |
|                           | 2 april-maj                             |                  |       |
|                           | 3 juni-augusti                          |                  |       |
|                           | 4 september-oktober                     |                  |       |
|                           | 5 november-december                     |                  |       |
| bv1 belastning vs paoncil | 1 medelbelastning                       |                  |       |
|                           | 2 underbelastning                       |                  |       |
|                           | 3 överbelastning                        |                  |       |
| holiday större helg       | 1 ingen större helg                     |                  |       |
|                           | 2 större helg (påsk/midsommar/julonyår) |                  |       |

## Categorical Variables Codings

|                           |                                         | Parameter coding |       |
|---------------------------|-----------------------------------------|------------------|-------|
|                           |                                         | (30)             | (31)  |
|                           | 404310003                               | ,000             | ,000  |
|                           | 404310004                               | ,000             | ,000  |
|                           | 502300005                               | ,000             | ,000  |
|                           | 502300006                               | ,000             | ,000  |
|                           | 502300007                               | ,000             | ,000  |
|                           | 502300214                               | 1,000            | ,000  |
|                           | 502300411                               | ,000             | 1,000 |
|                           | 502300415                               | ,000             | ,000  |
|                           | 502300416                               | ,000             | ,000  |
|                           | 502300811                               | ,000             | ,000  |
|                           | 502300913                               | ,000             | ,000  |
| weekday veckodag          | 1 måndag                                |                  |       |
|                           | 2 tisdag                                |                  |       |
|                           | 3 onsdag                                |                  |       |
|                           | 4 torsdag                               |                  |       |
|                           | 5 fredag                                |                  |       |
|                           | 6 lördag                                |                  |       |
|                           | 7 söndag                                |                  |       |
| season säsong/period      | 1 januari-mars                          |                  |       |
|                           | 2 april-maj                             |                  |       |
|                           | 3 juni-augusti                          |                  |       |
|                           | 4 september-oktober                     |                  |       |
|                           | 5 november-december                     |                  |       |
| bv1 belastning vs paoncil | 1 medelbelastning                       |                  |       |
|                           | 2 underbelastning                       |                  |       |
|                           | 3 överbelastning                        |                  |       |
| holiday större helg       | 1 ingen större helg                     |                  |       |
|                           | 2 större helg (påsk/midsommar/julonyår) |                  |       |



## Categorical Variables Codings

|                           |                                         | Parameter coding |       |
|---------------------------|-----------------------------------------|------------------|-------|
|                           |                                         | (32)             | (33)  |
|                           | 404310003                               | ,000             | ,000  |
|                           | 404310004                               | ,000             | ,000  |
|                           | 502300005                               | ,000             | ,000  |
|                           | 502300006                               | ,000             | ,000  |
|                           | 502300007                               | ,000             | ,000  |
|                           | 502300214                               | ,000             | ,000  |
|                           | 502300411                               | ,000             | ,000  |
|                           | 502300415                               | 1,000            | ,000  |
|                           | 502300416                               | ,000             | 1,000 |
|                           | 502300811                               | ,000             | ,000  |
|                           | 502300913                               | ,000             | ,000  |
| weekday veckodag          | 1 måndag                                |                  |       |
|                           | 2 tisdag                                |                  |       |
|                           | 3 onsdag                                |                  |       |
|                           | 4 torsdag                               |                  |       |
|                           | 5 fredag                                |                  |       |
|                           | 6 lördag                                |                  |       |
|                           | 7 söndag                                |                  |       |
| season säsong/period      | 1 januari-mars                          |                  |       |
|                           | 2 april-maj                             |                  |       |
|                           | 3 juni-augusti                          |                  |       |
|                           | 4 september-oktober                     |                  |       |
|                           | 5 november-december                     |                  |       |
| bv1 belastning vs paoncil | 1 medelbelastning                       |                  |       |
|                           | 2 underbelastning                       |                  |       |
|                           | 3 överbelastning                        |                  |       |
| holiday större helg       | 1 ingen större helg                     |                  |       |
|                           | 2 större helg (påsk/midsommar/julonyår) |                  |       |

## Categorical Variables Codings

|                           |                                         | Parameter coding |       |
|---------------------------|-----------------------------------------|------------------|-------|
|                           |                                         | (34)             | (35)  |
|                           | 404310003                               | ,000             | ,000  |
|                           | 404310004                               | ,000             | ,000  |
|                           | 502300005                               | ,000             | ,000  |
|                           | 502300006                               | ,000             | ,000  |
|                           | 502300007                               | ,000             | ,000  |
|                           | 502300214                               | ,000             | ,000  |
|                           | 502300411                               | ,000             | ,000  |
|                           | 502300415                               | ,000             | ,000  |
|                           | 502300416                               | ,000             | ,000  |
|                           | 502300811                               | 1,000            | ,000  |
|                           | 502300913                               | ,000             | 1,000 |
| weekday veckodag          | 1 måndag                                |                  |       |
|                           | 2 tisdag                                |                  |       |
|                           | 3 onsdag                                |                  |       |
|                           | 4 torsdag                               |                  |       |
|                           | 5 fredag                                |                  |       |
|                           | 6 lördag                                |                  |       |
|                           | 7 söndag                                |                  |       |
| season säsong/period      | 1 januari-mars                          |                  |       |
|                           | 2 april-maj                             |                  |       |
|                           | 3 juni-augusti                          |                  |       |
|                           | 4 september-oktober                     |                  |       |
|                           | 5 november-december                     |                  |       |
| bv1 belastning vs paencil | 1 medelbelastning                       |                  |       |
|                           | 2 underbelastning                       |                  |       |
|                           | 3 överbelastning                        |                  |       |
| holiday större helg       | 1 ingen större helg                     |                  |       |
|                           | 2 större helg (påsk/midsommar/julonyår) |                  |       |

## Block 0: Beginning Block

Classification Table<sup>a,b</sup>

| Observed           |                             | Predicted            |                      |
|--------------------|-----------------------------|----------------------|----------------------|
|                    |                             | 0 inget dödsfall     | 1 minst ett dödsfall |
| Step 0             | dod01 dödsfall ja eller nej | 0 inget dödsfall     | 11839                |
|                    |                             | 1 minst ett dödsfall | 636                  |
| Overall Percentage |                             |                      |                      |

Classification Table<sup>a,b</sup>

| Observed           |                             |                      | Predicted          |
|--------------------|-----------------------------|----------------------|--------------------|
|                    |                             |                      | Percentage Correct |
| Step 0             | dod01 dödsfall ja eller nej | 0 inget dödsfall     | 100,0              |
|                    |                             | 1 minst ett dödsfall | ,0                 |
| Overall Percentage |                             |                      | 94,9               |

a. Constant is included in the model.

b. The cut value is ,500

Variables in the Equation

|        |          | B      | S.E. | Wald     | df | Sig. | Exp(B) |
|--------|----------|--------|------|----------|----|------|--------|
| Step 0 | Constant | -2,924 | ,041 | 5160,279 | 1  | ,000 | ,054   |

Variables not in the Equation

|        |           |            | Score   | df | Sig. |
|--------|-----------|------------|---------|----|------|
| Step 0 | Variables | bv1        | 63,175  | 2  | ,000 |
|        |           | bv1(1)     | 45,163  | 1  | ,000 |
|        |           | bv1(2)     | 43,009  | 1  | ,000 |
|        |           | VASTY2     | 635,545 | 35 | ,000 |
|        |           | VASTY2(1)  | 2,519   | 1  | ,113 |
|        |           | VASTY2(2)  | 6,299   | 1  | ,012 |
|        |           | VASTY2(3)  | 8,957   | 1  | ,003 |
|        |           | VASTY2(4)  | ,151    | 1  | ,698 |
|        |           | VASTY2(5)  | 7,537   | 1  | ,006 |
|        |           | VASTY2(6)  | 20,142  | 1  | ,000 |
|        |           | VASTY2(7)  | 127,387 | 1  | ,000 |
|        |           | VASTY2(8)  | 8,957   | 1  | ,003 |
|        |           | VASTY2(9)  | ,163    | 1  | ,687 |
|        |           | VASTY2(10) | 7,570   | 1  | ,006 |
|        |           | VASTY2(11) | ,113    | 1  | ,737 |
|        |           | VASTY2(12) | 47,021  | 1  | ,000 |
|        |           | VASTY2(13) | 90,515  | 1  | ,000 |
|        |           | VASTY2(14) | 7,570   | 1  | ,006 |
|        |           | VASTY2(15) | ,151    | 1  | ,698 |
|        |           | VASTY2(16) | 4,298   | 1  | ,038 |
|        |           | VASTY2(17) | 20,199  | 1  | ,000 |
|        |           | VASTY2(18) | 17,916  | 1  | ,000 |
|        |           | VASTY2(19) | 18,086  | 1  | ,000 |
|        |           | VASTY2(20) | 10,563  | 1  | ,001 |
|        |           | VASTY2(21) | 1,696   | 1  | ,193 |
|        |           | VASTY2(22) | 26,693  | 1  | ,000 |
|        |           | VASTY2(23) | 1,125   | 1  | ,289 |
|        |           | VASTY2(24) | 72,662  | 1  | ,000 |

## Variables not in the Equation

|                    | Score   | df | Sig. |
|--------------------|---------|----|------|
| VASTY2(25)         | 2,477   | 1  | ,116 |
| VASTY2(26)         | 16,006  | 1  | ,000 |
| VASTY2(27)         | 20,256  | 1  | ,000 |
| VASTY2(28)         | 12,309  | 1  | ,000 |
| VASTY2(29)         | 20,256  | 1  | ,000 |
| VASTY2(30)         | 1,263   | 1  | ,261 |
| VASTY2(31)         | 20,256  | 1  | ,000 |
| VASTY2(32)         | 15,810  | 1  | ,000 |
| VASTY2(33)         | 17,973  | 1  | ,000 |
| VASTY2(34)         | ,693    | 1  | ,405 |
| VASTY2(35)         | 17,360  | 1  | ,000 |
| weekday            | 2,920   | 6  | ,819 |
| weekday(1)         | ,422    | 1  | ,516 |
| weekday(2)         | ,103    | 1  | ,749 |
| weekday(3)         | ,575    | 1  | ,448 |
| weekday(4)         | ,109    | 1  | ,741 |
| weekday(5)         | ,165    | 1  | ,685 |
| weekday(6)         | 1,908   | 1  | ,167 |
| holiday(1)         | ,270    | 1  | ,603 |
| season             | 9,040   | 4  | ,060 |
| season(1)          | ,504    | 1  | ,478 |
| season(2)          | 2,866   | 1  | ,090 |
| season(3)          | ,328    | 1  | ,567 |
| season(4)          | 7,145   | 1  | ,008 |
| Overall Statistics | 667,337 | 48 | ,000 |

## Block 1: Method = Enter

## Omnibus Tests of Model Coefficients

|             | Chi-square | df | Sig. |
|-------------|------------|----|------|
| Step 1 Step | 738,299    | 48 | ,000 |
| Block       | 738,299    | 48 | ,000 |
| Model       | 738,299    | 48 | ,000 |

## Model Summary

| Step | -2 Log likelihood     | Cox & Snell R Square | Nagelkerke R Square |
|------|-----------------------|----------------------|---------------------|
| 1    | 4286,544 <sup>a</sup> | ,057                 | ,173                |

a. Estimation terminated at iteration number 20 because maximum iterations has been reached. Final solution cannot be found.

Classification Table<sup>a</sup>

| Observed           |                             | Predicted                   |                      |   |
|--------------------|-----------------------------|-----------------------------|----------------------|---|
|                    |                             | dod01 dödsfall ja eller nej |                      |   |
|                    |                             | 0 inget dödsfall            | 1 minst ett dödsfall |   |
| Step 1             | dod01 dödsfall ja eller nej | 0 inget dödsfall            | 11839                | 0 |
|                    |                             | 1 minst ett dödsfall        | 636                  | 0 |
| Overall Percentage |                             |                             |                      |   |

Classification Table<sup>a</sup>

| Observed           |                             | Predicted            |       |
|--------------------|-----------------------------|----------------------|-------|
|                    |                             | Percentage Correct   |       |
| Step 1             | dod01 dödsfall ja eller nej | 0 inget dödsfall     | 100,0 |
|                    |                             | 1 minst ett dödsfall | ,0    |
| Overall Percentage |                             |                      | 94,9  |

a. The cut value is ,500

Variables in the Equation

|                         | B       | S.E.     | Wald    | df | Sig. | Exp(B) |
|-------------------------|---------|----------|---------|----|------|--------|
| Step 1 <sup>a</sup> bv1 |         |          | 22,025  | 2  | ,000 |        |
| bv1(1)                  | -,254   | ,130     | 3,791   | 1  | ,052 | ,776   |
| bv1(2)                  | ,355    | ,098     | 13,074  | 1  | ,000 | 1,426  |
| VASTY2                  |         |          | 210,364 | 35 | ,000 |        |
| VASTY2(1)               | ,595    | ,343     | 3,010   | 1  | ,083 | 1,813  |
| VASTY2(2)               | ,712    | ,335     | 4,516   | 1  | ,034 | 2,038  |
| VASTY2(3)               | ,607    | ,335     | 3,275   | 1  | ,070 | 1,835  |
| VASTY2(4)               | ,016    | ,372     | ,002    | 1  | ,967 | 1,016  |
| VASTY2(5)               | -,856   | ,495     | 2,992   | 1  | ,084 | ,425   |
| VASTY2(6)               | -18,136 | 2096,795 | ,000    | 1  | ,993 | ,000   |
| VASTY2(7)               | 1,447   | ,311     | 21,666  | 1  | ,000 | 4,250  |
| VASTY2(8)               | ,734    | ,332     | 4,874   | 1  | ,027 | 2,083  |
| VASTY2(9)               | ,266    | ,362     | ,538    | 1  | ,463 | 1,305  |
| VASTY2(10)              | ,718    | ,334     | 4,632   | 1  | ,031 | 2,051  |
| VASTY2(11)              | ,314    | ,358     | ,770    | 1  | ,380 | 1,368  |
| VASTY2(12)              | 1,212   | ,315     | 14,756  | 1  | ,000 | 3,360  |
| VASTY2(13)              | 1,347   | ,312     | 18,705  | 1  | ,000 | 3,848  |
| VASTY2(14)              | ,681    | ,334     | 4,149   | 1  | ,042 | 1,976  |
| VASTY2(15)              | ,112    | ,370     | ,092    | 1  | ,762 | 1,119  |
| VASTY2(16)              | -,938   | ,645     | 2,118   | 1  | ,146 | ,391   |
| VASTY2(17)              | -17,973 | 2093,394 | ,000    | 1  | ,993 | ,000   |
| VASTY2(18)              | -2,705  | 1,038    | 6,788   | 1  | ,009 | ,067   |
| VASTY2(19)              | -2,465  | 1,041    | 5,603   | 1  | ,018 | ,085   |

## Variables in the Equation

|                     |            | 95% C.I. for EXP(B) |       |
|---------------------|------------|---------------------|-------|
|                     |            | Lower               | Upper |
| Step 1 <sup>a</sup> | bv1        |                     |       |
|                     | bv1(1)     | ,601                | 1,002 |
|                     | bv1(2)     | 1,176               | 1,728 |
|                     | VASTY2     |                     |       |
|                     | VASTY2(1)  | ,926                | 3,552 |
|                     | VASTY2(2)  | 1,057               | 3,929 |
|                     | VASTY2(3)  | ,951                | 3,542 |
|                     | VASTY2(4)  | ,490                | 2,104 |
|                     | VASTY2(5)  | ,161                | 1,121 |
|                     | VASTY2(6)  | ,000                | .     |
|                     | VASTY2(7)  | 2,311               | 7,816 |
|                     | VASTY2(8)  | 1,086               | 3,995 |
|                     | VASTY2(9)  | ,641                | 2,654 |
|                     | VASTY2(10) | 1,066               | 3,944 |
|                     | VASTY2(11) | ,679                | 2,758 |
|                     | VASTY2(12) | 1,810               | 6,235 |
|                     | VASTY2(13) | 2,089               | 7,086 |
|                     | VASTY2(14) | 1,026               | 3,807 |
|                     | VASTY2(15) | ,542                | 2,309 |
|                     | VASTY2(16) | ,111                | 1,385 |
|                     | VASTY2(17) | ,000                | .     |
|                     | VASTY2(18) | ,009                | ,512  |
|                     | VASTY2(19) | ,011                | ,654  |

review only

## Variables in the Equation

|            | B       | S.E.     | Wald    | df | Sig. | Exp(B) |
|------------|---------|----------|---------|----|------|--------|
| VASTY2(20) | -1,513  | ,643     | 5,548   | 1  | ,018 | ,220   |
| VASTY2(21) | ,497    | ,346     | 2,070   | 1  | ,150 | 1,644  |
| VASTY2(22) | 1,237   | ,322     | 14,789  | 1  | ,000 | 3,447  |
| VASTY2(23) | ,529    | ,348     | 2,312   | 1  | ,128 | 1,698  |
| VASTY2(24) | 1,281   | ,313     | 16,785  | 1  | ,000 | 3,602  |
| VASTY2(25) | -,227   | ,435     | ,271    | 1  | ,603 | ,797   |
| VASTY2(26) | -18,096 | 2344,694 | ,000    | 1  | ,994 | ,000   |
| VASTY2(27) | -18,135 | 2090,509 | ,000    | 1  | ,993 | ,000   |
| VASTY2(28) | -18,092 | 2670,146 | ,000    | 1  | ,995 | ,000   |
| VASTY2(29) | -18,069 | 2093,350 | ,000    | 1  | ,993 | ,000   |
| VASTY2(30) | -,084   | ,386     | ,047    | 1  | ,828 | ,920   |
| VASTY2(31) | -18,052 | 2088,876 | ,000    | 1  | ,993 | ,000   |
| VASTY2(32) | -1,973  | ,761     | 6,730   | 1  | ,009 | ,139   |
| VASTY2(33) | -2,697  | 1,038    | 6,747   | 1  | ,009 | ,067   |
| VASTY2(34) | ,421    | ,351     | 1,440   | 1  | ,230 | 1,524  |
| VASTY2(35) | -18,181 | 2253,097 | ,000    | 1  | ,994 | ,000   |
| weekday    |         |          | 3,187   | 6  | ,785 |        |
| weekday(1) | ,020    | ,153     | ,016    | 1  | ,898 | 1,020  |
| weekday(2) | -,071   | ,156     | ,206    | 1  | ,650 | ,932   |
| weekday(3) | ,040    | ,153     | ,070    | 1  | ,792 | 1,041  |
| weekday(4) | ,029    | ,154     | ,035    | 1  | ,853 | 1,029  |
| weekday(5) | -,059   | ,158     | ,140    | 1  | ,708 | ,942   |
| weekday(6) | -,198   | ,162     | 1,507   | 1  | ,220 | ,820   |
| holiday(1) | -,239   | ,256     | ,871    | 1  | ,351 | ,788   |
| season     |         |          | 7,376   | 4  | ,117 |        |
| season(1)  | ,039    | ,129     | ,093    | 1  | ,760 | 1,040  |
| season(2)  | ,094    | ,118     | ,634    | 1  | ,426 | 1,099  |
| season(3)  | -,061   | ,132     | ,213    | 1  | ,645 | ,941   |
| season(4)  | -,279   | ,142     | 3,840   | 1  | ,050 | ,756   |
| Constant   | -3,143  | ,302     | 108,344 | 1  | ,000 | ,043   |

## Variables in the Equation

|            | 95% C.I. for EXP(B) |       |
|------------|---------------------|-------|
|            | Lower               | Upper |
| VASTY2(20) | ,062                | ,776  |
| VASTY2(21) | ,835                | 3,238 |
| VASTY2(22) | 1,834               | 6,476 |
| VASTY2(23) | ,858                | 3,359 |
| VASTY2(24) | 1,951               | 6,649 |
| VASTY2(25) | ,340                | 1,871 |
| VASTY2(26) | ,000                | .     |
| VASTY2(27) | ,000                | .     |
| VASTY2(28) | ,000                | .     |
| VASTY2(29) | ,000                | .     |
| VASTY2(30) | ,431                | 1,961 |
| VASTY2(31) | ,000                | .     |
| VASTY2(32) | ,031                | ,617  |
| VASTY2(33) | ,009                | ,516  |
| VASTY2(34) | ,766                | 3,031 |
| VASTY2(35) | ,000                | .     |
| weekday    |                     |       |
| weekday(1) | ,756                | 1,375 |
| weekday(2) | ,686                | 1,265 |
| weekday(3) | ,772                | 1,405 |
| weekday(4) | ,761                | 1,392 |
| weekday(5) | ,691                | 1,285 |
| weekday(6) | ,597                | 1,126 |
| holiday(1) | ,477                | 1,300 |
| season     |                     |       |
| season(1)  | ,808                | 1,338 |
| season(2)  | ,871                | 1,386 |
| season(3)  | ,726                | 1,220 |
| season(4)  | ,572                | 1,000 |
| Constant   |                     |       |

a. Variable(s) entered on step 1: bv1, VASTY2, weekday, holiday, season.

```
LOGISTIC REGRESSION VARIABLES dod01
/METHOD=ENTER bv2 VASTY2 weekday holiday season
/CONTRAST (bv2)=Indicator(1)
/CONTRAST (VASTY2)=Indicator(1)
/CONTRAST (weekday)=Indicator(1)
/CONTRAST (holiday)=Indicator(1)
/CONTRAST (season)=Indicator(1)
/PRINT=CI(95)
/CRITERIA=PIN(0.05) POUT(0.10) ITERATE(20) CUT(0.5).
```



## Logistic Regression

[DataSet6] C:\cWordjan\Rafaela\_VCS\alla\_tillsammans\abo\_bjo\_vasa\_v1.sav

### Case Processing Summary

| Unweighted Cases <sup>a</sup> |                      | N     | Percent |
|-------------------------------|----------------------|-------|---------|
| Selected Cases                | Included in Analysis | 12475 | 100,0   |
|                               | Missing Cases        | 0     | ,0      |
|                               | Total                | 12475 | 100,0   |
| Unselected Cases              |                      | 0     | ,0      |
| Total                         |                      | 12475 | 100,0   |

a. If weight is in effect, see classification table for the total number of cases.

### Dependent Variable Encoding

| Original Value       | Internal Value |
|----------------------|----------------|
| 0 inget dödsfall     | 0              |
| 1 minst ett dödsfall | 1              |

### Categorical Variables Codings

|                           | Frequency |
|---------------------------|-----------|
| VASTY2 (SAIR*10000)+VASTY | 365       |
| 403073101                 | 362       |
| 403073102                 | 365       |
| 403073103                 | 365       |
| 403073202                 | 365       |
| 403073203                 | 365       |
| 403073204                 | 330       |
| 403073303                 | 364       |
| 403073651                 | 362       |
| 403073771                 | 365       |
| 403133102                 | 341       |
| 403133106                 | 365       |
| 403133107                 | 365       |
| 403133109                 | 365       |
| 403133202                 | 365       |
| 403133203                 | 365       |
| 403133204                 | 365       |
| 403133315                 | 177       |
| 403133322                 | 365       |
| 403133401                 | 362       |
| 403133402                 | 365       |
| 403133550                 | 298       |
| 403133772                 | 365       |
| 403135803                 | 365       |

## Categorical Variables Codings

|                           |           | Parameter |
|---------------------------|-----------|-----------|
|                           |           | (1)       |
| VASTY2 (SAIR*10000)+VASTY | 403073101 | ,000      |
|                           | 403073102 | 1,000     |
|                           | 403073103 | ,000      |
|                           | 403073202 | ,000      |
|                           | 403073203 | ,000      |
|                           | 403073204 | ,000      |
|                           | 403073303 | ,000      |
|                           | 403073651 | ,000      |
|                           | 403073771 | ,000      |
|                           | 403133102 | ,000      |
|                           | 403133106 | ,000      |
|                           | 403133107 | ,000      |
|                           | 403133109 | ,000      |
|                           | 403133202 | ,000      |
|                           | 403133203 | ,000      |
|                           | 403133204 | ,000      |
|                           | 403133315 | ,000      |
|                           | 403133322 | ,000      |
|                           | 403133401 | ,000      |
|                           | 403133402 | ,000      |
|                           | 403133550 | ,000      |
|                           | 403133772 | ,000      |
|                           | 403135803 | ,000      |

## Categorical Variables Codings

|                           |           | Parameter |
|---------------------------|-----------|-----------|
|                           |           | (2)       |
| VASTY2 (SAIR*10000)+VASTY | 403073101 | ,000      |
|                           | 403073102 | ,000      |
|                           | 403073103 | 1,000     |
|                           | 403073202 | ,000      |
|                           | 403073203 | ,000      |
|                           | 403073204 | ,000      |
|                           | 403073303 | ,000      |
|                           | 403073651 | ,000      |
|                           | 403073771 | ,000      |
|                           | 403133102 | ,000      |
|                           | 403133106 | ,000      |
|                           | 403133107 | ,000      |
|                           | 403133109 | ,000      |
|                           | 403133202 | ,000      |
|                           | 403133203 | ,000      |
|                           | 403133204 | ,000      |
|                           | 403133315 | ,000      |
|                           | 403133322 | ,000      |
|                           | 403133401 | ,000      |
|                           | 403133402 | ,000      |
|                           | 403133550 | ,000      |
|                           | 403133772 | ,000      |
|                           | 403135803 | ,000      |

## Categorical Variables Codings

|                           |           | Parameter |
|---------------------------|-----------|-----------|
|                           |           | (3)       |
| VASTY2 (SAIR*10000)+VASTY | 403073101 | ,000      |
|                           | 403073102 | ,000      |
|                           | 403073103 | ,000      |
|                           | 403073202 | 1,000     |
|                           | 403073203 | ,000      |
|                           | 403073204 | ,000      |
|                           | 403073303 | ,000      |
|                           | 403073651 | ,000      |
|                           | 403073771 | ,000      |
|                           | 403133102 | ,000      |
|                           | 403133106 | ,000      |
|                           | 403133107 | ,000      |
|                           | 403133109 | ,000      |
|                           | 403133202 | ,000      |
|                           | 403133203 | ,000      |
|                           | 403133204 | ,000      |
|                           | 403133315 | ,000      |
|                           | 403133322 | ,000      |
|                           | 403133401 | ,000      |
|                           | 403133402 | ,000      |
|                           | 403133550 | ,000      |
|                           | 403133772 | ,000      |
|                           | 403135803 | ,000      |

## Categorical Variables Codings

|                           |           | Parameter |
|---------------------------|-----------|-----------|
|                           |           | (4)       |
| VASTY2 (SAIR*10000)+VASTY | 403073101 | ,000      |
|                           | 403073102 | ,000      |
|                           | 403073103 | ,000      |
|                           | 403073202 | ,000      |
|                           | 403073203 | 1,000     |
|                           | 403073204 | ,000      |
|                           | 403073303 | ,000      |
|                           | 403073651 | ,000      |
|                           | 403073771 | ,000      |
|                           | 403133102 | ,000      |
|                           | 403133106 | ,000      |
|                           | 403133107 | ,000      |
|                           | 403133109 | ,000      |
|                           | 403133202 | ,000      |
|                           | 403133203 | ,000      |
|                           | 403133204 | ,000      |
|                           | 403133315 | ,000      |
|                           | 403133322 | ,000      |
|                           | 403133401 | ,000      |
|                           | 403133402 | ,000      |
|                           | 403133550 | ,000      |
|                           | 403133772 | ,000      |
|                           | 403135803 | ,000      |

## Categorical Variables Codings

|                           |           | Parameter |
|---------------------------|-----------|-----------|
|                           |           | (5)       |
| VASTY2 (SAIR*10000)+VASTY | 403073101 | ,000      |
|                           | 403073102 | ,000      |
|                           | 403073103 | ,000      |
|                           | 403073202 | ,000      |
|                           | 403073203 | ,000      |
|                           | 403073204 | 1,000     |
|                           | 403073303 | ,000      |
|                           | 403073651 | ,000      |
|                           | 403073771 | ,000      |
|                           | 403133102 | ,000      |
|                           | 403133106 | ,000      |
|                           | 403133107 | ,000      |
|                           | 403133109 | ,000      |
|                           | 403133202 | ,000      |
|                           | 403133203 | ,000      |
|                           | 403133204 | ,000      |
|                           | 403133315 | ,000      |
|                           | 403133322 | ,000      |
|                           | 403133401 | ,000      |
|                           | 403133402 | ,000      |
|                           | 403133550 | ,000      |
|                           | 403133772 | ,000      |
|                           | 403135803 | ,000      |

## Categorical Variables Codings

|                           |           | Parameter |
|---------------------------|-----------|-----------|
|                           |           | (6)       |
| VASTY2 (SAIR*10000)+VASTY | 403073101 | ,000      |
|                           | 403073102 | ,000      |
|                           | 403073103 | ,000      |
|                           | 403073202 | ,000      |
|                           | 403073203 | ,000      |
|                           | 403073204 | ,000      |
|                           | 403073303 | 1,000     |
|                           | 403073651 | ,000      |
|                           | 403073771 | ,000      |
|                           | 403133102 | ,000      |
|                           | 403133106 | ,000      |
|                           | 403133107 | ,000      |
|                           | 403133109 | ,000      |
|                           | 403133202 | ,000      |
|                           | 403133203 | ,000      |
|                           | 403133204 | ,000      |
|                           | 403133315 | ,000      |
|                           | 403133322 | ,000      |
|                           | 403133401 | ,000      |
|                           | 403133402 | ,000      |
|                           | 403133550 | ,000      |
|                           | 403133772 | ,000      |
|                           | 403135803 | ,000      |

## Categorical Variables Codings

|                           |           | Parameter |
|---------------------------|-----------|-----------|
|                           |           | (7)       |
| VASTY2 (SAIR*10000)+VASTY | 403073101 | ,000      |
|                           | 403073102 | ,000      |
|                           | 403073103 | ,000      |
|                           | 403073202 | ,000      |
|                           | 403073203 | ,000      |
|                           | 403073204 | ,000      |
|                           | 403073303 | ,000      |
|                           | 403073651 | 1,000     |
|                           | 403073771 | ,000      |
|                           | 403133102 | ,000      |
|                           | 403133106 | ,000      |
|                           | 403133107 | ,000      |
|                           | 403133109 | ,000      |
|                           | 403133202 | ,000      |
|                           | 403133203 | ,000      |
|                           | 403133204 | ,000      |
|                           | 403133315 | ,000      |
|                           | 403133322 | ,000      |
|                           | 403133401 | ,000      |
|                           | 403133402 | ,000      |
|                           | 403133550 | ,000      |
|                           | 403133772 | ,000      |
|                           | 403135803 | ,000      |



## Categorical Variables Codings

|                           |           | Parameter |
|---------------------------|-----------|-----------|
|                           |           | (8)       |
| VASTY2 (SAIR*10000)+VASTY | 403073101 | ,000      |
|                           | 403073102 | ,000      |
|                           | 403073103 | ,000      |
|                           | 403073202 | ,000      |
|                           | 403073203 | ,000      |
|                           | 403073204 | ,000      |
|                           | 403073303 | ,000      |
|                           | 403073651 | ,000      |
|                           | 403073771 | 1,000     |
|                           | 403133102 | ,000      |
|                           | 403133106 | ,000      |
|                           | 403133107 | ,000      |
|                           | 403133109 | ,000      |
|                           | 403133202 | ,000      |
|                           | 403133203 | ,000      |
|                           | 403133204 | ,000      |
|                           | 403133315 | ,000      |
|                           | 403133322 | ,000      |
|                           | 403133401 | ,000      |
|                           | 403133402 | ,000      |
|                           | 403133550 | ,000      |
|                           | 403133772 | ,000      |
|                           | 403135803 | ,000      |

## Categorical Variables Codings

|                           |           | Parameter |
|---------------------------|-----------|-----------|
|                           |           | (9)       |
| VASTY2 (SAIR*10000)+VASTY | 403073101 | ,000      |
|                           | 403073102 | ,000      |
|                           | 403073103 | ,000      |
|                           | 403073202 | ,000      |
|                           | 403073203 | ,000      |
|                           | 403073204 | ,000      |
|                           | 403073303 | ,000      |
|                           | 403073651 | ,000      |
|                           | 403073771 | ,000      |
|                           | 403133102 | 1,000     |
|                           | 403133106 | ,000      |
|                           | 403133107 | ,000      |
|                           | 403133109 | ,000      |
|                           | 403133202 | ,000      |
|                           | 403133203 | ,000      |
|                           | 403133204 | ,000      |
|                           | 403133315 | ,000      |
|                           | 403133322 | ,000      |
|                           | 403133401 | ,000      |
|                           | 403133402 | ,000      |
|                           | 403133550 | ,000      |
|                           | 403133772 | ,000      |
|                           | 403135803 | ,000      |

1  
2  
3  
4  
5  
6  
7  
8  
9  
10  
11  
12  
13  
14  
15  
16  
17  
18  
19  
20  
21  
22  
23  
24  
25  
26  
27  
28  
29  
30  
31  
32  
33  
34  
35  
36  
37  
38  
39  
40  
41  
42  
43  
44  
45  
46  
47  
48  
49  
50  
51  
52  
53  
54  
55  
56  
57  
58  
59  
60

**Categorical Variables Codings**

|                           |           | Parameter |
|---------------------------|-----------|-----------|
|                           |           | (10)      |
| VASTY2 (SAIR*10000)+VASTY | 403073101 | ,000      |
|                           | 403073102 | ,000      |
|                           | 403073103 | ,000      |
|                           | 403073202 | ,000      |
|                           | 403073203 | ,000      |
|                           | 403073204 | ,000      |
|                           | 403073303 | ,000      |
|                           | 403073651 | ,000      |
|                           | 403073771 | ,000      |
|                           | 403133102 | ,000      |
|                           | 403133106 | 1,000     |
|                           | 403133107 | ,000      |
|                           | 403133109 | ,000      |
|                           | 403133202 | ,000      |
|                           | 403133203 | ,000      |
|                           | 403133204 | ,000      |
|                           | 403133315 | ,000      |
|                           | 403133322 | ,000      |
|                           | 403133401 | ,000      |
|                           | 403133402 | ,000      |
|                           | 403133550 | ,000      |
|                           | 403133772 | ,000      |
|                           | 403135803 | ,000      |

Peer Review Only

## Categorical Variables Codings

|                           |           | Parameter |
|---------------------------|-----------|-----------|
|                           |           | (1)       |
| VASTY2 (SAIR*10000)+VASTY | 403073101 | ,000      |
|                           | 403073102 | ,000      |
|                           | 403073103 | ,000      |
|                           | 403073202 | ,000      |
|                           | 403073203 | ,000      |
|                           | 403073204 | ,000      |
|                           | 403073303 | ,000      |
|                           | 403073651 | ,000      |
|                           | 403073771 | ,000      |
|                           | 403133102 | ,000      |
|                           | 403133106 | ,000      |
|                           | 403133107 | 1,000     |
|                           | 403133109 | ,000      |
|                           | 403133202 | ,000      |
|                           | 403133203 | ,000      |
|                           | 403133204 | ,000      |
|                           | 403133315 | ,000      |
|                           | 403133322 | ,000      |
|                           | 403133401 | ,000      |
|                           | 403133402 | ,000      |
|                           | 403133550 | ,000      |
|                           | 403133772 | ,000      |
|                           | 403135803 | ,000      |

1  
2  
3  
4  
5  
6  
7  
8  
9  
10  
11  
12  
13  
14  
15  
16  
17  
18  
19  
20  
21  
22  
23  
24  
25  
26  
27  
28  
29  
30  
31  
32  
33  
34  
35  
36  
37  
38  
39  
40  
41  
42  
43  
44  
45  
46  
47  
48  
49  
50  
51  
52  
53  
54  
55  
56  
57  
58  
59  
60

**Categorical Variables Codings**

|                           |           | Parameter |
|---------------------------|-----------|-----------|
|                           |           | (12)      |
| VASTY2 (SAIR*10000)+VASTY | 403073101 | ,000      |
|                           | 403073102 | ,000      |
|                           | 403073103 | ,000      |
|                           | 403073202 | ,000      |
|                           | 403073203 | ,000      |
|                           | 403073204 | ,000      |
|                           | 403073303 | ,000      |
|                           | 403073651 | ,000      |
|                           | 403073771 | ,000      |
|                           | 403133102 | ,000      |
|                           | 403133106 | ,000      |
|                           | 403133107 | ,000      |
|                           | 403133109 | 1,000     |
|                           | 403133202 | ,000      |
|                           | 403133203 | ,000      |
|                           | 403133204 | ,000      |
|                           | 403133315 | ,000      |
|                           | 403133322 | ,000      |
|                           | 403133401 | ,000      |
|                           | 403133402 | ,000      |
|                           | 403133550 | ,000      |
|                           | 403133772 | ,000      |
|                           | 403135803 | ,000      |

Peer review only

## Categorical Variables Codings

|                           |           | Parameter |
|---------------------------|-----------|-----------|
|                           |           | (13)      |
| VASTY2 (SAIR*10000)+VASTY | 403073101 | ,000      |
|                           | 403073102 | ,000      |
|                           | 403073103 | ,000      |
|                           | 403073202 | ,000      |
|                           | 403073203 | ,000      |
|                           | 403073204 | ,000      |
|                           | 403073303 | ,000      |
|                           | 403073651 | ,000      |
|                           | 403073771 | ,000      |
|                           | 403133102 | ,000      |
|                           | 403133106 | ,000      |
|                           | 403133107 | ,000      |
|                           | 403133109 | ,000      |
|                           | 403133202 | 1,000     |
|                           | 403133203 | ,000      |
|                           | 403133204 | ,000      |
|                           | 403133315 | ,000      |
|                           | 403133322 | ,000      |
|                           | 403133401 | ,000      |
|                           | 403133402 | ,000      |
|                           | 403133550 | ,000      |
|                           | 403133772 | ,000      |
|                           | 403135803 | ,000      |

1  
2  
3  
4  
5  
6  
7  
8  
9  
10  
11  
12  
13  
14  
15  
16  
17  
18  
19  
20  
21  
22  
23  
24  
25  
26  
27  
28  
29  
30  
31  
32  
33  
34  
35  
36  
37  
38  
39  
40  
41  
42  
43  
44  
45  
46  
47  
48  
49  
50  
51  
52  
53  
54  
55  
56  
57  
58  
59  
60

**Categorical Variables Codings**

|                           |           | Parameter |
|---------------------------|-----------|-----------|
|                           |           | (14)      |
| VASTY2 (SAIR*10000)+VASTY | 403073101 | ,000      |
|                           | 403073102 | ,000      |
|                           | 403073103 | ,000      |
|                           | 403073202 | ,000      |
|                           | 403073203 | ,000      |
|                           | 403073204 | ,000      |
|                           | 403073303 | ,000      |
|                           | 403073651 | ,000      |
|                           | 403073771 | ,000      |
|                           | 403133102 | ,000      |
|                           | 403133106 | ,000      |
|                           | 403133107 | ,000      |
|                           | 403133109 | ,000      |
|                           | 403133202 | ,000      |
|                           | 403133203 | 1,000     |
|                           | 403133204 | ,000      |
|                           | 403133315 | ,000      |
|                           | 403133322 | ,000      |
|                           | 403133401 | ,000      |
|                           | 403133402 | ,000      |
|                           | 403133550 | ,000      |
|                           | 403133772 | ,000      |
|                           | 403135803 | ,000      |

Peer review only

## Categorical Variables Codings

|                           |           | Parameter |
|---------------------------|-----------|-----------|
|                           |           | (15)      |
| VASTY2 (SAIR*10000)+VASTY | 403073101 | ,000      |
|                           | 403073102 | ,000      |
|                           | 403073103 | ,000      |
|                           | 403073202 | ,000      |
|                           | 403073203 | ,000      |
|                           | 403073204 | ,000      |
|                           | 403073303 | ,000      |
|                           | 403073651 | ,000      |
|                           | 403073771 | ,000      |
|                           | 403133102 | ,000      |
|                           | 403133106 | ,000      |
|                           | 403133107 | ,000      |
|                           | 403133109 | ,000      |
|                           | 403133202 | ,000      |
|                           | 403133203 | ,000      |
|                           | 403133204 | 1,000     |
|                           | 403133315 | ,000      |
|                           | 403133322 | ,000      |
|                           | 403133401 | ,000      |
|                           | 403133402 | ,000      |
|                           | 403133550 | ,000      |
|                           | 403133772 | ,000      |
|                           | 403135803 | ,000      |



1  
2  
3  
4  
5  
6  
7  
8  
9  
10  
11  
12  
13  
14  
15  
16  
17  
18  
19  
20  
21  
22  
23  
24  
25  
26  
27  
28  
29  
30  
31  
32  
33  
34  
35  
36  
37  
38  
39  
40  
41  
42  
43  
44  
45  
46  
47  
48  
49  
50  
51  
52  
53  
54  
55  
56  
57  
58  
59  
60

**Categorical Variables Codings**

|                           |           | Parameter |
|---------------------------|-----------|-----------|
|                           |           | (16)      |
| VASTY2 (SAIR*10000)+VASTY | 403073101 | ,000      |
|                           | 403073102 | ,000      |
|                           | 403073103 | ,000      |
|                           | 403073202 | ,000      |
|                           | 403073203 | ,000      |
|                           | 403073204 | ,000      |
|                           | 403073303 | ,000      |
|                           | 403073651 | ,000      |
|                           | 403073771 | ,000      |
|                           | 403133102 | ,000      |
|                           | 403133106 | ,000      |
|                           | 403133107 | ,000      |
|                           | 403133109 | ,000      |
|                           | 403133202 | ,000      |
|                           | 403133203 | ,000      |
|                           | 403133204 | ,000      |
|                           | 403133315 | 1,000     |
|                           | 403133322 | ,000      |
|                           | 403133401 | ,000      |
|                           | 403133402 | ,000      |
|                           | 403133550 | ,000      |
|                           | 403133772 | ,000      |
|                           | 403135803 | ,000      |

Peer review only

## Categorical Variables Codings

|                           |           | Parameter |
|---------------------------|-----------|-----------|
|                           |           | (17)      |
| VASTY2 (SAIR*10000)+VASTY | 403073101 | ,000      |
|                           | 403073102 | ,000      |
|                           | 403073103 | ,000      |
|                           | 403073202 | ,000      |
|                           | 403073203 | ,000      |
|                           | 403073204 | ,000      |
|                           | 403073303 | ,000      |
|                           | 403073651 | ,000      |
|                           | 403073771 | ,000      |
|                           | 403133102 | ,000      |
|                           | 403133106 | ,000      |
|                           | 403133107 | ,000      |
|                           | 403133109 | ,000      |
|                           | 403133202 | ,000      |
|                           | 403133203 | ,000      |
|                           | 403133204 | ,000      |
|                           | 403133315 | ,000      |
|                           | 403133322 | 1,000     |
|                           | 403133401 | ,000      |
|                           | 403133402 | ,000      |
|                           | 403133550 | ,000      |
|                           | 403133772 | ,000      |
|                           | 403135803 | ,000      |

1  
2  
3  
4  
5  
6  
7  
8  
9  
10  
11  
12  
13  
14  
15  
16  
17  
18  
19  
20  
21  
22  
23  
24  
25  
26  
27  
28  
29  
30  
31  
32  
33  
34  
35  
36  
37  
38  
39  
40  
41  
42  
43  
44  
45  
46  
47  
48  
49  
50  
51  
52  
53  
54  
55  
56  
57  
58  
59  
60

**Categorical Variables Codings**

|                           |           | Parameter |
|---------------------------|-----------|-----------|
|                           |           | (18)      |
| VASTY2 (SAIR*10000)+VASTY | 403073101 | ,000      |
|                           | 403073102 | ,000      |
|                           | 403073103 | ,000      |
|                           | 403073202 | ,000      |
|                           | 403073203 | ,000      |
|                           | 403073204 | ,000      |
|                           | 403073303 | ,000      |
|                           | 403073651 | ,000      |
|                           | 403073771 | ,000      |
|                           | 403133102 | ,000      |
|                           | 403133106 | ,000      |
|                           | 403133107 | ,000      |
|                           | 403133109 | ,000      |
|                           | 403133202 | ,000      |
|                           | 403133203 | ,000      |
|                           | 403133204 | ,000      |
|                           | 403133315 | ,000      |
|                           | 403133322 | ,000      |
|                           | 403133401 | 1,000     |
|                           | 403133402 | ,000      |
|                           | 403133550 | ,000      |
|                           | 403133772 | ,000      |
|                           | 403135803 | ,000      |

Peer review only

## Categorical Variables Codings

|                           |           | Parameter |
|---------------------------|-----------|-----------|
|                           |           | (19)      |
| VASTY2 (SAIR*10000)+VASTY | 403073101 | ,000      |
|                           | 403073102 | ,000      |
|                           | 403073103 | ,000      |
|                           | 403073202 | ,000      |
|                           | 403073203 | ,000      |
|                           | 403073204 | ,000      |
|                           | 403073303 | ,000      |
|                           | 403073651 | ,000      |
|                           | 403073771 | ,000      |
|                           | 403133102 | ,000      |
|                           | 403133106 | ,000      |
|                           | 403133107 | ,000      |
|                           | 403133109 | ,000      |
|                           | 403133202 | ,000      |
|                           | 403133203 | ,000      |
|                           | 403133204 | ,000      |
|                           | 403133315 | ,000      |
|                           | 403133322 | ,000      |
|                           | 403133401 | ,000      |
|                           | 403133402 | 1,000     |
|                           | 403133550 | ,000      |
|                           | 403133772 | ,000      |
|                           | 403135803 | ,000      |

1  
2  
3  
4  
5  
6  
7  
8  
9  
10  
11  
12  
13  
14  
15  
16  
17  
18  
19  
20  
21  
22  
23  
24  
25  
26  
27  
28  
29  
30  
31  
32  
33  
34  
35  
36  
37  
38  
39  
40  
41  
42  
43  
44  
45  
46  
47  
48  
49  
50  
51  
52  
53  
54  
55  
56  
57  
58  
59  
60

**Categorical Variables Codings**

|                           |           | Parameter |
|---------------------------|-----------|-----------|
|                           |           | (20)      |
| VASTY2 (SAIR*10000)+VASTY | 403073101 | ,000      |
|                           | 403073102 | ,000      |
|                           | 403073103 | ,000      |
|                           | 403073202 | ,000      |
|                           | 403073203 | ,000      |
|                           | 403073204 | ,000      |
|                           | 403073303 | ,000      |
|                           | 403073651 | ,000      |
|                           | 403073771 | ,000      |
|                           | 403133102 | ,000      |
|                           | 403133106 | ,000      |
|                           | 403133107 | ,000      |
|                           | 403133109 | ,000      |
|                           | 403133202 | ,000      |
|                           | 403133203 | ,000      |
|                           | 403133204 | ,000      |
|                           | 403133315 | ,000      |
|                           | 403133322 | ,000      |
|                           | 403133401 | ,000      |
|                           | 403133402 | ,000      |
|                           | 403133550 | 1,000     |
|                           | 403133772 | ,000      |
|                           | 403135803 | ,000      |

Peer review only

## Categorical Variables Codings

|                           |           | Parameter |
|---------------------------|-----------|-----------|
|                           |           | (21)      |
| VASTY2 (SAIR*10000)+VASTY | 403073101 | ,000      |
|                           | 403073102 | ,000      |
|                           | 403073103 | ,000      |
|                           | 403073202 | ,000      |
|                           | 403073203 | ,000      |
|                           | 403073204 | ,000      |
|                           | 403073303 | ,000      |
|                           | 403073651 | ,000      |
|                           | 403073771 | ,000      |
|                           | 403133102 | ,000      |
|                           | 403133106 | ,000      |
|                           | 403133107 | ,000      |
|                           | 403133109 | ,000      |
|                           | 403133202 | ,000      |
|                           | 403133203 | ,000      |
|                           | 403133204 | ,000      |
|                           | 403133315 | ,000      |
|                           | 403133322 | ,000      |
|                           | 403133401 | ,000      |
|                           | 403133402 | ,000      |
|                           | 403133550 | ,000      |
|                           | 403133772 | 1,000     |
|                           | 403135803 | ,000      |

1  
2  
3  
4  
5  
6  
7  
8  
9  
10  
11  
12  
13  
14  
15  
16  
17  
18  
19  
20  
21  
22  
23  
24  
25  
26  
27  
28  
29  
30  
31  
32  
33  
34  
35  
36  
37  
38  
39  
40  
41  
42  
43  
44  
45  
46  
47  
48  
49  
50  
51  
52  
53  
54  
55  
56  
57  
58  
59  
60

**Categorical Variables Codings**

|                           |           | Parameter |
|---------------------------|-----------|-----------|
|                           |           | (22)      |
| VASTY2 (SAIR*10000)+VASTY | 403073101 | ,000      |
|                           | 403073102 | ,000      |
|                           | 403073103 | ,000      |
|                           | 403073202 | ,000      |
|                           | 403073203 | ,000      |
|                           | 403073204 | ,000      |
|                           | 403073303 | ,000      |
|                           | 403073651 | ,000      |
|                           | 403073771 | ,000      |
|                           | 403133102 | ,000      |
|                           | 403133106 | ,000      |
|                           | 403133107 | ,000      |
|                           | 403133109 | ,000      |
|                           | 403133202 | ,000      |
|                           | 403133203 | ,000      |
|                           | 403133204 | ,000      |
|                           | 403133315 | ,000      |
|                           | 403133322 | ,000      |
|                           | 403133401 | ,000      |
|                           | 403133402 | ,000      |
|                           | 403133550 | ,000      |
|                           | 403133772 | ,000      |
|                           | 403135803 | 1,000     |

Peer review only

## Categorical Variables Codings

|                           |           | Parameter |
|---------------------------|-----------|-----------|
|                           |           | (23)      |
| VASTY2 (SAIR*10000)+VASTY | 403073101 | ,000      |
|                           | 403073102 | ,000      |
|                           | 403073103 | ,000      |
|                           | 403073202 | ,000      |
|                           | 403073203 | ,000      |
|                           | 403073204 | ,000      |
|                           | 403073303 | ,000      |
|                           | 403073651 | ,000      |
|                           | 403073771 | ,000      |
|                           | 403133102 | ,000      |
|                           | 403133106 | ,000      |
|                           | 403133107 | ,000      |
|                           | 403133109 | ,000      |
|                           | 403133202 | ,000      |
|                           | 403133203 | ,000      |
|                           | 403133204 | ,000      |
|                           | 403133315 | ,000      |
|                           | 403133322 | ,000      |
|                           | 403133401 | ,000      |
|                           | 403133402 | ,000      |
|                           | 403133550 | ,000      |
|                           | 403133772 | ,000      |
|                           | 403135803 | ,000      |



## Categorical Variables Codings

|                           |           | Parameter |
|---------------------------|-----------|-----------|
|                           |           | (24)      |
| VASTY2 (SAIR*10000)+VASTY | 403073101 | ,000      |
|                           | 403073102 | ,000      |
|                           | 403073103 | ,000      |
|                           | 403073202 | ,000      |
|                           | 403073203 | ,000      |
|                           | 403073204 | ,000      |
|                           | 403073303 | ,000      |
|                           | 403073651 | ,000      |
|                           | 403073771 | ,000      |
|                           | 403133102 | ,000      |
|                           | 403133106 | ,000      |
|                           | 403133107 | ,000      |
|                           | 403133109 | ,000      |
|                           | 403133202 | ,000      |
|                           | 403133203 | ,000      |
|                           | 403133204 | ,000      |
|                           | 403133315 | ,000      |
|                           | 403133322 | ,000      |
|                           | 403133401 | ,000      |
|                           | 403133402 | ,000      |
|                           | 403133550 | ,000      |
|                           | 403133772 | ,000      |
|                           | 403135803 | ,000      |

## Categorical Variables Codings

|                           |           | Parameter |
|---------------------------|-----------|-----------|
|                           |           | (25)      |
| VASTY2 (SAIR*10000)+VASTY | 403073101 | ,000      |
|                           | 403073102 | ,000      |
|                           | 403073103 | ,000      |
|                           | 403073202 | ,000      |
|                           | 403073203 | ,000      |
|                           | 403073204 | ,000      |
|                           | 403073303 | ,000      |
|                           | 403073651 | ,000      |
|                           | 403073771 | ,000      |
|                           | 403133102 | ,000      |
|                           | 403133106 | ,000      |
|                           | 403133107 | ,000      |
|                           | 403133109 | ,000      |
|                           | 403133202 | ,000      |
|                           | 403133203 | ,000      |
|                           | 403133204 | ,000      |
|                           | 403133315 | ,000      |
|                           | 403133322 | ,000      |
|                           | 403133401 | ,000      |
|                           | 403133402 | ,000      |
|                           | 403133550 | ,000      |
|                           | 403133772 | ,000      |
|                           | 403135803 | ,000      |

w only

## Categorical Variables Codings

|                           |           | Parameter |
|---------------------------|-----------|-----------|
|                           |           | (26)      |
| VASTY2 (SAIR*10000)+VASTY | 403073101 | ,000      |
|                           | 403073102 | ,000      |
|                           | 403073103 | ,000      |
|                           | 403073202 | ,000      |
|                           | 403073203 | ,000      |
|                           | 403073204 | ,000      |
|                           | 403073303 | ,000      |
|                           | 403073651 | ,000      |
|                           | 403073771 | ,000      |
|                           | 403133102 | ,000      |
|                           | 403133106 | ,000      |
|                           | 403133107 | ,000      |
|                           | 403133109 | ,000      |
|                           | 403133202 | ,000      |
|                           | 403133203 | ,000      |
|                           | 403133204 | ,000      |
|                           | 403133315 | ,000      |
|                           | 403133322 | ,000      |
|                           | 403133401 | ,000      |
|                           | 403133402 | ,000      |
|                           | 403133550 | ,000      |
|                           | 403133772 | ,000      |
|                           | 403135803 | ,000      |

## Categorical Variables Codings

|                           |           | Parameter |
|---------------------------|-----------|-----------|
|                           |           | (27)      |
| VASTY2 (SAIR*10000)+VASTY | 403073101 | ,000      |
|                           | 403073102 | ,000      |
|                           | 403073103 | ,000      |
|                           | 403073202 | ,000      |
|                           | 403073203 | ,000      |
|                           | 403073204 | ,000      |
|                           | 403073303 | ,000      |
|                           | 403073651 | ,000      |
|                           | 403073771 | ,000      |
|                           | 403133102 | ,000      |
|                           | 403133106 | ,000      |
|                           | 403133107 | ,000      |
|                           | 403133109 | ,000      |
|                           | 403133202 | ,000      |
|                           | 403133203 | ,000      |
|                           | 403133204 | ,000      |
|                           | 403133315 | ,000      |
|                           | 403133322 | ,000      |
|                           | 403133401 | ,000      |
|                           | 403133402 | ,000      |
|                           | 403133550 | ,000      |
|                           | 403133772 | ,000      |
|                           | 403135803 | ,000      |

1  
2  
3  
4  
5  
6  
7  
8  
9  
10  
11  
12  
13  
14  
15  
16  
17  
18  
19  
20  
21  
22  
23  
24  
25  
26  
27  
28  
29  
30  
31  
32  
33  
34  
35  
36  
37  
38  
39  
40  
41  
42  
43  
44  
45  
46  
47  
48  
49  
50  
51  
52  
53  
54  
55  
56  
57  
58  
59  
60

**Categorical Variables Codings**

|                           |           | Parameter |
|---------------------------|-----------|-----------|
|                           |           | (28)      |
| VASTY2 (SAIR*10000)+VASTY | 403073101 | ,000      |
|                           | 403073102 | ,000      |
|                           | 403073103 | ,000      |
|                           | 403073202 | ,000      |
|                           | 403073203 | ,000      |
|                           | 403073204 | ,000      |
|                           | 403073303 | ,000      |
|                           | 403073651 | ,000      |
|                           | 403073771 | ,000      |
|                           | 403133102 | ,000      |
|                           | 403133106 | ,000      |
|                           | 403133107 | ,000      |
|                           | 403133109 | ,000      |
|                           | 403133202 | ,000      |
|                           | 403133203 | ,000      |
|                           | 403133204 | ,000      |
|                           | 403133315 | ,000      |
|                           | 403133322 | ,000      |
|                           | 403133401 | ,000      |
|                           | 403133402 | ,000      |
|                           | 403133550 | ,000      |
|                           | 403133772 | ,000      |
|                           | 403135803 | ,000      |

Peer review only

## Categorical Variables Codings

|                           |           | Parameter |
|---------------------------|-----------|-----------|
|                           |           | (29)      |
| VASTY2 (SAIR*10000)+VASTY | 403073101 | ,000      |
|                           | 403073102 | ,000      |
|                           | 403073103 | ,000      |
|                           | 403073202 | ,000      |
|                           | 403073203 | ,000      |
|                           | 403073204 | ,000      |
|                           | 403073303 | ,000      |
|                           | 403073651 | ,000      |
|                           | 403073771 | ,000      |
|                           | 403133102 | ,000      |
|                           | 403133106 | ,000      |
|                           | 403133107 | ,000      |
|                           | 403133109 | ,000      |
|                           | 403133202 | ,000      |
|                           | 403133203 | ,000      |
|                           | 403133204 | ,000      |
|                           | 403133315 | ,000      |
|                           | 403133322 | ,000      |
|                           | 403133401 | ,000      |
|                           | 403133402 | ,000      |
|                           | 403133550 | ,000      |
|                           | 403133772 | ,000      |
|                           | 403135803 | ,000      |

## Categorical Variables Codings

|                           |           | Parameter |
|---------------------------|-----------|-----------|
|                           |           | (30)      |
| VASTY2 (SAIR*10000)+VASTY | 403073101 | ,000      |
|                           | 403073102 | ,000      |
|                           | 403073103 | ,000      |
|                           | 403073202 | ,000      |
|                           | 403073203 | ,000      |
|                           | 403073204 | ,000      |
|                           | 403073303 | ,000      |
|                           | 403073651 | ,000      |
|                           | 403073771 | ,000      |
|                           | 403133102 | ,000      |
|                           | 403133106 | ,000      |
|                           | 403133107 | ,000      |
|                           | 403133109 | ,000      |
|                           | 403133202 | ,000      |
|                           | 403133203 | ,000      |
|                           | 403133204 | ,000      |
|                           | 403133315 | ,000      |
|                           | 403133322 | ,000      |
|                           | 403133401 | ,000      |
|                           | 403133402 | ,000      |
|                           | 403133550 | ,000      |
|                           | 403133772 | ,000      |
|                           | 403135803 | ,000      |

## Categorical Variables Codings

|                           |           | Parameter |
|---------------------------|-----------|-----------|
|                           |           | (31)      |
| VASTY2 (SAIR*10000)+VASTY | 403073101 | ,000      |
|                           | 403073102 | ,000      |
|                           | 403073103 | ,000      |
|                           | 403073202 | ,000      |
|                           | 403073203 | ,000      |
|                           | 403073204 | ,000      |
|                           | 403073303 | ,000      |
|                           | 403073651 | ,000      |
|                           | 403073771 | ,000      |
|                           | 403133102 | ,000      |
|                           | 403133106 | ,000      |
|                           | 403133107 | ,000      |
|                           | 403133109 | ,000      |
|                           | 403133202 | ,000      |
|                           | 403133203 | ,000      |
|                           | 403133204 | ,000      |
|                           | 403133315 | ,000      |
|                           | 403133322 | ,000      |
|                           | 403133401 | ,000      |
|                           | 403133402 | ,000      |
|                           | 403133550 | ,000      |
|                           | 403133772 | ,000      |
|                           | 403135803 | ,000      |



## Categorical Variables Codings

|                           |           | Parameter |
|---------------------------|-----------|-----------|
|                           |           | (32)      |
| VASTY2 (SAIR*10000)+VASTY | 403073101 | ,000      |
|                           | 403073102 | ,000      |
|                           | 403073103 | ,000      |
|                           | 403073202 | ,000      |
|                           | 403073203 | ,000      |
|                           | 403073204 | ,000      |
|                           | 403073303 | ,000      |
|                           | 403073651 | ,000      |
|                           | 403073771 | ,000      |
|                           | 403133102 | ,000      |
|                           | 403133106 | ,000      |
|                           | 403133107 | ,000      |
|                           | 403133109 | ,000      |
|                           | 403133202 | ,000      |
|                           | 403133203 | ,000      |
|                           | 403133204 | ,000      |
|                           | 403133315 | ,000      |
|                           | 403133322 | ,000      |
|                           | 403133401 | ,000      |
|                           | 403133402 | ,000      |
|                           | 403133550 | ,000      |
|                           | 403133772 | ,000      |
|                           | 403135803 | ,000      |

## Categorical Variables Codings

|                           |           | Parameter |
|---------------------------|-----------|-----------|
|                           |           | (33)      |
| VASTY2 (SAIR*10000)+VASTY | 403073101 | ,000      |
|                           | 403073102 | ,000      |
|                           | 403073103 | ,000      |
|                           | 403073202 | ,000      |
|                           | 403073203 | ,000      |
|                           | 403073204 | ,000      |
|                           | 403073303 | ,000      |
|                           | 403073651 | ,000      |
|                           | 403073771 | ,000      |
|                           | 403133102 | ,000      |
|                           | 403133106 | ,000      |
|                           | 403133107 | ,000      |
|                           | 403133109 | ,000      |
|                           | 403133202 | ,000      |
|                           | 403133203 | ,000      |
|                           | 403133204 | ,000      |
|                           | 403133315 | ,000      |
|                           | 403133322 | ,000      |
|                           | 403133401 | ,000      |
|                           | 403133402 | ,000      |
|                           | 403133550 | ,000      |
|                           | 403133772 | ,000      |
|                           | 403135803 | ,000      |

## Categorical Variables Codings

|                           |           | Parameter |
|---------------------------|-----------|-----------|
|                           |           | (34)      |
| VASTY2 (SAIR*10000)+VASTY | 403073101 | ,000      |
|                           | 403073102 | ,000      |
|                           | 403073103 | ,000      |
|                           | 403073202 | ,000      |
|                           | 403073203 | ,000      |
|                           | 403073204 | ,000      |
|                           | 403073303 | ,000      |
|                           | 403073651 | ,000      |
|                           | 403073771 | ,000      |
|                           | 403133102 | ,000      |
|                           | 403133106 | ,000      |
|                           | 403133107 | ,000      |
|                           | 403133109 | ,000      |
|                           | 403133202 | ,000      |
|                           | 403133203 | ,000      |
|                           | 403133204 | ,000      |
|                           | 403133315 | ,000      |
|                           | 403133322 | ,000      |
|                           | 403133401 | ,000      |
|                           | 403133402 | ,000      |
|                           | 403133550 | ,000      |
|                           | 403133772 | ,000      |
|                           | 403135803 | ,000      |

## Categorical Variables Codings

|                           |           | Paramete... |
|---------------------------|-----------|-------------|
|                           |           | (35)        |
| VASTY2 (SAIR*10000)+VASTY | 403073101 | ,000        |
|                           | 403073102 | ,000        |
|                           | 403073103 | ,000        |
|                           | 403073202 | ,000        |
|                           | 403073203 | ,000        |
|                           | 403073204 | ,000        |
|                           | 403073303 | ,000        |
|                           | 403073651 | ,000        |
|                           | 403073771 | ,000        |
|                           | 403133102 | ,000        |
|                           | 403133106 | ,000        |
|                           | 403133107 | ,000        |
|                           | 403133109 | ,000        |
|                           | 403133202 | ,000        |
|                           | 403133203 | ,000        |
|                           | 403133204 | ,000        |
|                           | 403133315 | ,000        |
|                           | 403133322 | ,000        |
|                           | 403133401 | ,000        |
|                           | 403133402 | ,000        |
|                           | 403133550 | ,000        |
|                           | 403133772 | ,000        |
|                           | 403135803 | ,000        |

## Categorical Variables Codings

|                                             |                                         | Frequency |
|---------------------------------------------|-----------------------------------------|-----------|
|                                             | 404060001                               | 365       |
|                                             | 404060002                               | 366       |
|                                             | 404310003                               | 291       |
|                                             | 404310004                               | 291       |
|                                             | 502300005                               | 366       |
|                                             | 502300006                               | 225       |
|                                             | 502300007                               | 366       |
|                                             | 502300214                               | 366       |
|                                             | 502300411                               | 366       |
|                                             | 502300415                               | 360       |
|                                             | 502300416                               | 363       |
|                                             | 502300811                               | 364       |
|                                             | 502300913                               | 315       |
| weekday veckodag                            | 1 måndag                                | 1805      |
|                                             | 2 tisdag                                | 1812      |
|                                             | 3 onsdag                                | 1800      |
|                                             | 4 torsdag                               | 1794      |
|                                             | 5 fredag                                | 1788      |
|                                             | 6 lördag                                | 1735      |
|                                             | 7 söndag                                | 1741      |
| season säsong/period                        | 1 januari-mars                          | 3182      |
|                                             | 2 april-maj                             | 2127      |
|                                             | 3 juni-augusti                          | 2911      |
|                                             | 4 september-oktober                     | 2144      |
|                                             | 5 november-december                     | 2111      |
| bv2 belastning vs paoncil halva intervallet | 1 medelbelastning                       | 2788      |
|                                             | 2 underbelastning                       | 4419      |
|                                             | 3 överbelastning                        | 5268      |
| holiday större helg                         | 1 ingen större helg                     | 12078     |
|                                             | 2 större helg (påsk/midsommar/julonyår) | 397       |

## Categorical Variables Codings

|                                             |                                         | Parameter |
|---------------------------------------------|-----------------------------------------|-----------|
|                                             |                                         | (1)       |
|                                             | 404060001                               | ,000      |
|                                             | 404060002                               | ,000      |
|                                             | 404310003                               | ,000      |
|                                             | 404310004                               | ,000      |
|                                             | 502300005                               | ,000      |
|                                             | 502300006                               | ,000      |
|                                             | 502300007                               | ,000      |
|                                             | 502300214                               | ,000      |
|                                             | 502300411                               | ,000      |
|                                             | 502300415                               | ,000      |
|                                             | 502300416                               | ,000      |
|                                             | 502300811                               | ,000      |
|                                             | 502300913                               | ,000      |
| weekday veckodag                            | 1 måndag                                | ,000      |
|                                             | 2 tisdag                                | 1,000     |
|                                             | 3 onsdag                                | ,000      |
|                                             | 4 torsdag                               | ,000      |
|                                             | 5 fredag                                | ,000      |
|                                             | 6 lördag                                | ,000      |
|                                             | 7 söndag                                | ,000      |
| season säsong/period                        | 1 januari-mars                          | ,000      |
|                                             | 2 april-maj                             | 1,000     |
|                                             | 3 juni-augusti                          | ,000      |
|                                             | 4 september-oktober                     | ,000      |
|                                             | 5 november-december                     | ,000      |
| bv2 belastning vs paoncil halva intervallet | 1 medelbelastning                       | ,000      |
|                                             | 2 underbelastning                       | 1,000     |
|                                             | 3 överbelastning                        | ,000      |
| holiday större helg                         | 1 ingen större helg                     | ,000      |
|                                             | 2 större helg (påsk/midsommar/julonyår) | 1,000     |

## Categorical Variables Codings

|                                             |                                         | Parameter |
|---------------------------------------------|-----------------------------------------|-----------|
|                                             |                                         | (2)       |
|                                             | 404060001                               | ,000      |
|                                             | 404060002                               | ,000      |
|                                             | 404310003                               | ,000      |
|                                             | 404310004                               | ,000      |
|                                             | 502300005                               | ,000      |
|                                             | 502300006                               | ,000      |
|                                             | 502300007                               | ,000      |
|                                             | 502300214                               | ,000      |
|                                             | 502300411                               | ,000      |
|                                             | 502300415                               | ,000      |
|                                             | 502300416                               | ,000      |
|                                             | 502300811                               | ,000      |
|                                             | 502300913                               | ,000      |
| weekday veckodag                            | 1 måndag                                | ,000      |
|                                             | 2 tisdag                                | ,000      |
|                                             | 3 onsdag                                | 1,000     |
|                                             | 4 torsdag                               | ,000      |
|                                             | 5 fredag                                | ,000      |
|                                             | 6 lördag                                | ,000      |
|                                             | 7 söndag                                | ,000      |
| season säsong/period                        | 1 januari-mars                          | ,000      |
|                                             | 2 april-maj                             | ,000      |
|                                             | 3 juni-augusti                          | 1,000     |
|                                             | 4 september-oktober                     | ,000      |
|                                             | 5 november-december                     | ,000      |
| bv2 belastning vs paoncil halva intervallet | 1 medelbelastning                       | ,000      |
|                                             | 2 underbelastning                       | ,000      |
|                                             | 3 överbelastning                        | 1,000     |
| holiday större helg                         | 1 ingen större helg                     |           |
|                                             | 2 större helg (påsk/midsommar/julonyår) |           |

## Categorical Variables Codings

|                                             |                                         | Parameter |
|---------------------------------------------|-----------------------------------------|-----------|
|                                             |                                         | (3)       |
|                                             | 404060001                               | ,000      |
|                                             | 404060002                               | ,000      |
|                                             | 404310003                               | ,000      |
|                                             | 404310004                               | ,000      |
|                                             | 502300005                               | ,000      |
|                                             | 502300006                               | ,000      |
|                                             | 502300007                               | ,000      |
|                                             | 502300214                               | ,000      |
|                                             | 502300411                               | ,000      |
|                                             | 502300415                               | ,000      |
|                                             | 502300416                               | ,000      |
|                                             | 502300811                               | ,000      |
|                                             | 502300913                               | ,000      |
| weekday veckodag                            | 1 måndag                                | ,000      |
|                                             | 2 tisdag                                | ,000      |
|                                             | 3 onsdag                                | ,000      |
|                                             | 4 torsdag                               | 1,000     |
|                                             | 5 fredag                                | ,000      |
|                                             | 6 lördag                                | ,000      |
|                                             | 7 söndag                                | ,000      |
| season säsong/period                        | 1 januari-mars                          | ,000      |
|                                             | 2 april-maj                             | ,000      |
|                                             | 3 juni-augusti                          | ,000      |
|                                             | 4 september-oktober                     | 1,000     |
|                                             | 5 november-december                     | ,000      |
| bv2 belastning vs paoncil halva intervallet | 1 medelbelastning                       |           |
|                                             | 2 underbelastning                       |           |
|                                             | 3 överbelastning                        |           |
| holiday större helg                         | 1 ingen större helg                     |           |
|                                             | 2 större helg (påsk/midsommar/julonyår) |           |



## Categorical Variables Codings

|                                             |                                         | Parameter |
|---------------------------------------------|-----------------------------------------|-----------|
|                                             |                                         | (4)       |
|                                             | 404060001                               | ,000      |
|                                             | 404060002                               | ,000      |
|                                             | 404310003                               | ,000      |
|                                             | 404310004                               | ,000      |
|                                             | 502300005                               | ,000      |
|                                             | 502300006                               | ,000      |
|                                             | 502300007                               | ,000      |
|                                             | 502300214                               | ,000      |
|                                             | 502300411                               | ,000      |
|                                             | 502300415                               | ,000      |
|                                             | 502300416                               | ,000      |
|                                             | 502300811                               | ,000      |
|                                             | 502300913                               | ,000      |
| weekday veckodag                            | 1 måndag                                | ,000      |
|                                             | 2 tisdag                                | ,000      |
|                                             | 3 onsdag                                | ,000      |
|                                             | 4 torsdag                               | ,000      |
|                                             | 5 fredag                                | 1,000     |
|                                             | 6 lördag                                | ,000      |
|                                             | 7 söndag                                | ,000      |
| season säsong/period                        | 1 januari-mars                          | ,000      |
|                                             | 2 april-maj                             | ,000      |
|                                             | 3 juni-augusti                          | ,000      |
|                                             | 4 september-oktober                     | ,000      |
|                                             | 5 november-december                     | 1,000     |
| bv2 belastning vs paoncil halva intervallet | 1 medelbelastning                       |           |
|                                             | 2 underbelastning                       |           |
|                                             | 3 överbelastning                        |           |
| holiday större helg                         | 1 ingen större helg                     |           |
|                                             | 2 större helg (påsk/midsommar/julonyår) |           |

## Categorical Variables Codings

|                                             |                                         | Parameter |
|---------------------------------------------|-----------------------------------------|-----------|
|                                             |                                         | (5)       |
|                                             | 404060001                               | ,000      |
|                                             | 404060002                               | ,000      |
|                                             | 404310003                               | ,000      |
|                                             | 404310004                               | ,000      |
|                                             | 502300005                               | ,000      |
|                                             | 502300006                               | ,000      |
|                                             | 502300007                               | ,000      |
|                                             | 502300214                               | ,000      |
|                                             | 502300411                               | ,000      |
|                                             | 502300415                               | ,000      |
|                                             | 502300416                               | ,000      |
|                                             | 502300811                               | ,000      |
|                                             | 502300913                               | ,000      |
| weekday veckodag                            | 1 måndag                                | ,000      |
|                                             | 2 tisdag                                | ,000      |
|                                             | 3 onsdag                                | ,000      |
|                                             | 4 torsdag                               | ,000      |
|                                             | 5 fredag                                | ,000      |
|                                             | 6 lördag                                | 1,000     |
|                                             | 7 söndag                                | ,000      |
| season säsong/period                        | 1 januari-mars                          |           |
|                                             | 2 april-maj                             |           |
|                                             | 3 juni-augusti                          |           |
|                                             | 4 september-oktober                     |           |
|                                             | 5 november-december                     |           |
| bv2 belastning vs paoncil halva intervallet | 1 medelbelastning                       |           |
|                                             | 2 underbelastning                       |           |
|                                             | 3 överbelastning                        |           |
| holiday större helg                         | 1 ingen större helg                     |           |
|                                             | 2 större helg (påsk/midsommar/julonyår) |           |

## Categorical Variables Codings

|                                             |                                         | Parameter |
|---------------------------------------------|-----------------------------------------|-----------|
|                                             |                                         | (6)       |
|                                             | 404060001                               | ,000      |
|                                             | 404060002                               | ,000      |
|                                             | 404310003                               | ,000      |
|                                             | 404310004                               | ,000      |
|                                             | 502300005                               | ,000      |
|                                             | 502300006                               | ,000      |
|                                             | 502300007                               | ,000      |
|                                             | 502300214                               | ,000      |
|                                             | 502300411                               | ,000      |
|                                             | 502300415                               | ,000      |
|                                             | 502300416                               | ,000      |
|                                             | 502300811                               | ,000      |
|                                             | 502300913                               | ,000      |
| weekday veckodag                            | 1 måndag                                | ,000      |
|                                             | 2 tisdag                                | ,000      |
|                                             | 3 onsdag                                | ,000      |
|                                             | 4 torsdag                               | ,000      |
|                                             | 5 fredag                                | ,000      |
|                                             | 6 lördag                                | ,000      |
|                                             | 7 söndag                                | 1,000     |
| season säsong/period                        | 1 januari-mars                          |           |
|                                             | 2 april-maj                             |           |
|                                             | 3 juni-augusti                          |           |
|                                             | 4 september-oktober                     |           |
|                                             | 5 november-december                     |           |
| bv2 belastning vs paoncil halva intervallet | 1 medelbelastning                       |           |
|                                             | 2 underbelastning                       |           |
|                                             | 3 överbelastning                        |           |
| holiday större helg                         | 1 ingen större helg                     |           |
|                                             | 2 större helg (påsk/midsommar/julonyår) |           |

## Categorical Variables Codings

|                                             |                                         | Parameter |
|---------------------------------------------|-----------------------------------------|-----------|
|                                             |                                         | (7)       |
|                                             | 404060001                               | ,000      |
|                                             | 404060002                               | ,000      |
|                                             | 404310003                               | ,000      |
|                                             | 404310004                               | ,000      |
|                                             | 502300005                               | ,000      |
|                                             | 502300006                               | ,000      |
|                                             | 502300007                               | ,000      |
|                                             | 502300214                               | ,000      |
|                                             | 502300411                               | ,000      |
|                                             | 502300415                               | ,000      |
|                                             | 502300416                               | ,000      |
|                                             | 502300811                               | ,000      |
|                                             | 502300913                               | ,000      |
| weekday veckodag                            | 1 måndag                                |           |
|                                             | 2 tisdag                                |           |
|                                             | 3 onsdag                                |           |
|                                             | 4 torsdag                               |           |
|                                             | 5 fredag                                |           |
|                                             | 6 lördag                                |           |
|                                             | 7 söndag                                |           |
| season säsong/period                        | 1 januari-mars                          |           |
|                                             | 2 april-maj                             |           |
|                                             | 3 juni-augusti                          |           |
|                                             | 4 september-oktober                     |           |
|                                             | 5 november-december                     |           |
| bv2 belastning vs paoncil halva intervallet | 1 medelbelastning                       |           |
|                                             | 2 underbelastning                       |           |
|                                             | 3 överbelastning                        |           |
| holiday större helg                         | 1 ingen större helg                     |           |
|                                             | 2 större helg (påsk/midsommar/julonyår) |           |

## Categorical Variables Codings

|                                             |                                         | Parameter |
|---------------------------------------------|-----------------------------------------|-----------|
|                                             |                                         | (8)       |
|                                             | 404060001                               | ,000      |
|                                             | 404060002                               | ,000      |
|                                             | 404310003                               | ,000      |
|                                             | 404310004                               | ,000      |
|                                             | 502300005                               | ,000      |
|                                             | 502300006                               | ,000      |
|                                             | 502300007                               | ,000      |
|                                             | 502300214                               | ,000      |
|                                             | 502300411                               | ,000      |
|                                             | 502300415                               | ,000      |
|                                             | 502300416                               | ,000      |
|                                             | 502300811                               | ,000      |
|                                             | 502300913                               | ,000      |
| weekday veckodag                            | 1 måndag                                |           |
|                                             | 2 tisdag                                |           |
|                                             | 3 onsdag                                |           |
|                                             | 4 torsdag                               |           |
|                                             | 5 fredag                                |           |
|                                             | 6 lördag                                |           |
|                                             | 7 söndag                                |           |
| season säsong/period                        | 1 januari-mars                          |           |
|                                             | 2 april-maj                             |           |
|                                             | 3 juni-augusti                          |           |
|                                             | 4 september-oktober                     |           |
|                                             | 5 november-december                     |           |
| bv2 belastning vs paoncil halva intervallet | 1 medelbelastning                       |           |
|                                             | 2 underbelastning                       |           |
|                                             | 3 överbelastning                        |           |
| holiday större helg                         | 1 ingen större helg                     |           |
|                                             | 2 större helg (påsk/midsommar/julonyår) |           |

## Categorical Variables Codings

|                                             |                                         | Parameter |
|---------------------------------------------|-----------------------------------------|-----------|
|                                             |                                         | (9)       |
|                                             | 404060001                               | ,000      |
|                                             | 404060002                               | ,000      |
|                                             | 404310003                               | ,000      |
|                                             | 404310004                               | ,000      |
|                                             | 502300005                               | ,000      |
|                                             | 502300006                               | ,000      |
|                                             | 502300007                               | ,000      |
|                                             | 502300214                               | ,000      |
|                                             | 502300411                               | ,000      |
|                                             | 502300415                               | ,000      |
|                                             | 502300416                               | ,000      |
|                                             | 502300811                               | ,000      |
|                                             | 502300913                               | ,000      |
| weekday veckodag                            | 1 måndag                                |           |
|                                             | 2 tisdag                                |           |
|                                             | 3 onsdag                                |           |
|                                             | 4 torsdag                               |           |
|                                             | 5 fredag                                |           |
|                                             | 6 lördag                                |           |
|                                             | 7 söndag                                |           |
| season säsong/period                        | 1 januari-mars                          |           |
|                                             | 2 april-maj                             |           |
|                                             | 3 juni-augusti                          |           |
|                                             | 4 september-oktober                     |           |
|                                             | 5 november-december                     |           |
| bv2 belastning vs paoncil halva intervallet | 1 medelbelastning                       |           |
|                                             | 2 underbelastning                       |           |
|                                             | 3 överbelastning                        |           |
| holiday större helg                         | 1 ingen större helg                     |           |
|                                             | 2 större helg (påsk/midsommar/julonyår) |           |

## Categorical Variables Codings

|                                             |                                         | Parameter |
|---------------------------------------------|-----------------------------------------|-----------|
|                                             |                                         | (10)      |
|                                             | 404060001                               | ,000      |
|                                             | 404060002                               | ,000      |
|                                             | 404310003                               | ,000      |
|                                             | 404310004                               | ,000      |
|                                             | 502300005                               | ,000      |
|                                             | 502300006                               | ,000      |
|                                             | 502300007                               | ,000      |
|                                             | 502300214                               | ,000      |
|                                             | 502300411                               | ,000      |
|                                             | 502300415                               | ,000      |
|                                             | 502300416                               | ,000      |
|                                             | 502300811                               | ,000      |
|                                             | 502300913                               | ,000      |
| weekday veckodag                            | 1 måndag                                |           |
|                                             | 2 tisdag                                |           |
|                                             | 3 onsdag                                |           |
|                                             | 4 torsdag                               |           |
|                                             | 5 fredag                                |           |
|                                             | 6 lördag                                |           |
|                                             | 7 söndag                                |           |
| season säsong/period                        | 1 januari-mars                          |           |
|                                             | 2 april-maj                             |           |
|                                             | 3 juni-augusti                          |           |
|                                             | 4 september-oktober                     |           |
|                                             | 5 november-december                     |           |
| bv2 belastning vs paoncil halva intervallet | 1 medelbelastning                       |           |
|                                             | 2 underbelastning                       |           |
|                                             | 3 överbelastning                        |           |
| holiday större helg                         | 1 ingen större helg                     |           |
|                                             | 2 större helg (påsk/midsommar/julonyår) |           |

## Categorical Variables Codings

|                                             |                                         | Parameter |
|---------------------------------------------|-----------------------------------------|-----------|
|                                             |                                         | (1)       |
|                                             | 404060001                               | ,000      |
|                                             | 404060002                               | ,000      |
|                                             | 404310003                               | ,000      |
|                                             | 404310004                               | ,000      |
|                                             | 502300005                               | ,000      |
|                                             | 502300006                               | ,000      |
|                                             | 502300007                               | ,000      |
|                                             | 502300214                               | ,000      |
|                                             | 502300411                               | ,000      |
|                                             | 502300415                               | ,000      |
|                                             | 502300416                               | ,000      |
|                                             | 502300811                               | ,000      |
|                                             | 502300913                               | ,000      |
| weekday veckodag                            | 1 måndag                                |           |
|                                             | 2 tisdag                                |           |
|                                             | 3 onsdag                                |           |
|                                             | 4 torsdag                               |           |
|                                             | 5 fredag                                |           |
|                                             | 6 lördag                                |           |
|                                             | 7 söndag                                |           |
| season säsong/period                        | 1 januari-mars                          |           |
|                                             | 2 april-maj                             |           |
|                                             | 3 juni-augusti                          |           |
|                                             | 4 september-oktober                     |           |
|                                             | 5 november-december                     |           |
| bv2 belastning vs paoncil halva intervallet | 1 medelbelastning                       |           |
|                                             | 2 underbelastning                       |           |
|                                             | 3 överbelastning                        |           |
| holiday större helg                         | 1 ingen större helg                     |           |
|                                             | 2 större helg (påsk/midsommar/julonyår) |           |



## Categorical Variables Codings

|                                             |                                         | Parameter |
|---------------------------------------------|-----------------------------------------|-----------|
|                                             |                                         | (12)      |
|                                             | 404060001                               | ,000      |
|                                             | 404060002                               | ,000      |
|                                             | 404310003                               | ,000      |
|                                             | 404310004                               | ,000      |
|                                             | 502300005                               | ,000      |
|                                             | 502300006                               | ,000      |
|                                             | 502300007                               | ,000      |
|                                             | 502300214                               | ,000      |
|                                             | 502300411                               | ,000      |
|                                             | 502300415                               | ,000      |
|                                             | 502300416                               | ,000      |
|                                             | 502300811                               | ,000      |
|                                             | 502300913                               | ,000      |
| weekday veckodag                            | 1 måndag                                |           |
|                                             | 2 tisdag                                |           |
|                                             | 3 onsdag                                |           |
|                                             | 4 torsdag                               |           |
|                                             | 5 fredag                                |           |
|                                             | 6 lördag                                |           |
|                                             | 7 söndag                                |           |
| season säsong/period                        | 1 januari-mars                          |           |
|                                             | 2 april-maj                             |           |
|                                             | 3 juni-augusti                          |           |
|                                             | 4 september-oktober                     |           |
|                                             | 5 november-december                     |           |
| bv2 belastning vs paoncil halva intervallet | 1 medelbelastning                       |           |
|                                             | 2 underbelastning                       |           |
|                                             | 3 överbelastning                        |           |
| holiday större helg                         | 1 ingen större helg                     |           |
|                                             | 2 större helg (påsk/midsommar/julonyår) |           |

## Categorical Variables Codings

|                                             |                                         | Parameter |
|---------------------------------------------|-----------------------------------------|-----------|
|                                             |                                         | (13)      |
|                                             | 404060001                               | ,000      |
|                                             | 404060002                               | ,000      |
|                                             | 404310003                               | ,000      |
|                                             | 404310004                               | ,000      |
|                                             | 502300005                               | ,000      |
|                                             | 502300006                               | ,000      |
|                                             | 502300007                               | ,000      |
|                                             | 502300214                               | ,000      |
|                                             | 502300411                               | ,000      |
|                                             | 502300415                               | ,000      |
|                                             | 502300416                               | ,000      |
|                                             | 502300811                               | ,000      |
|                                             | 502300913                               | ,000      |
| weekday veckodag                            | 1 måndag                                |           |
|                                             | 2 tisdag                                |           |
|                                             | 3 onsdag                                |           |
|                                             | 4 torsdag                               |           |
|                                             | 5 fredag                                |           |
|                                             | 6 lördag                                |           |
|                                             | 7 söndag                                |           |
| season säsong/period                        | 1 januari-mars                          |           |
|                                             | 2 april-maj                             |           |
|                                             | 3 juni-augusti                          |           |
|                                             | 4 september-oktober                     |           |
|                                             | 5 november-december                     |           |
| bv2 belastning vs paoncil halva intervallet | 1 medelbelastning                       |           |
|                                             | 2 underbelastning                       |           |
|                                             | 3 överbelastning                        |           |
| holiday större helg                         | 1 ingen större helg                     |           |
|                                             | 2 större helg (påsk/midsommar/julonyår) |           |

## Categorical Variables Codings

|                                             |                                         | Parameter |
|---------------------------------------------|-----------------------------------------|-----------|
|                                             |                                         | (14)      |
|                                             | 404060001                               | ,000      |
|                                             | 404060002                               | ,000      |
|                                             | 404310003                               | ,000      |
|                                             | 404310004                               | ,000      |
|                                             | 502300005                               | ,000      |
|                                             | 502300006                               | ,000      |
|                                             | 502300007                               | ,000      |
|                                             | 502300214                               | ,000      |
|                                             | 502300411                               | ,000      |
|                                             | 502300415                               | ,000      |
|                                             | 502300416                               | ,000      |
|                                             | 502300811                               | ,000      |
|                                             | 502300913                               | ,000      |
| weekday veckodag                            | 1 måndag                                |           |
|                                             | 2 tisdag                                |           |
|                                             | 3 onsdag                                |           |
|                                             | 4 torsdag                               |           |
|                                             | 5 fredag                                |           |
|                                             | 6 lördag                                |           |
|                                             | 7 söndag                                |           |
| season säsong/period                        | 1 januari-mars                          |           |
|                                             | 2 april-maj                             |           |
|                                             | 3 juni-augusti                          |           |
|                                             | 4 september-oktober                     |           |
|                                             | 5 november-december                     |           |
| bv2 belastning vs paoncil halva intervallet | 1 medelbelastning                       |           |
|                                             | 2 underbelastning                       |           |
|                                             | 3 överbelastning                        |           |
| holiday större helg                         | 1 ingen större helg                     |           |
|                                             | 2 större helg (påsk/midsommar/julonyår) |           |

## Categorical Variables Codings

|                                             |                                         | Parameter |
|---------------------------------------------|-----------------------------------------|-----------|
|                                             |                                         | (15)      |
|                                             | 404060001                               | ,000      |
|                                             | 404060002                               | ,000      |
|                                             | 404310003                               | ,000      |
|                                             | 404310004                               | ,000      |
|                                             | 502300005                               | ,000      |
|                                             | 502300006                               | ,000      |
|                                             | 502300007                               | ,000      |
|                                             | 502300214                               | ,000      |
|                                             | 502300411                               | ,000      |
|                                             | 502300415                               | ,000      |
|                                             | 502300416                               | ,000      |
|                                             | 502300811                               | ,000      |
|                                             | 502300913                               | ,000      |
| weekday veckodag                            | 1 måndag                                |           |
|                                             | 2 tisdag                                |           |
|                                             | 3 onsdag                                |           |
|                                             | 4 torsdag                               |           |
|                                             | 5 fredag                                |           |
|                                             | 6 lördag                                |           |
|                                             | 7 söndag                                |           |
| season säsong/period                        | 1 januari-mars                          |           |
|                                             | 2 april-maj                             |           |
|                                             | 3 juni-augusti                          |           |
|                                             | 4 september-oktober                     |           |
|                                             | 5 november-december                     |           |
| bv2 belastning vs paoncil halva intervallet | 1 medelbelastning                       |           |
|                                             | 2 underbelastning                       |           |
|                                             | 3 överbelastning                        |           |
| holiday större helg                         | 1 ingen större helg                     |           |
|                                             | 2 större helg (påsk/midsommar/julonyår) |           |

## Categorical Variables Codings

|                                             |                                         | Parameter |
|---------------------------------------------|-----------------------------------------|-----------|
|                                             |                                         | (16)      |
|                                             | 404060001                               | ,000      |
|                                             | 404060002                               | ,000      |
|                                             | 404310003                               | ,000      |
|                                             | 404310004                               | ,000      |
|                                             | 502300005                               | ,000      |
|                                             | 502300006                               | ,000      |
|                                             | 502300007                               | ,000      |
|                                             | 502300214                               | ,000      |
|                                             | 502300411                               | ,000      |
|                                             | 502300415                               | ,000      |
|                                             | 502300416                               | ,000      |
|                                             | 502300811                               | ,000      |
|                                             | 502300913                               | ,000      |
| weekday veckodag                            | 1 måndag                                |           |
|                                             | 2 tisdag                                |           |
|                                             | 3 onsdag                                |           |
|                                             | 4 torsdag                               |           |
|                                             | 5 fredag                                |           |
|                                             | 6 lördag                                |           |
|                                             | 7 söndag                                |           |
| season säsong/period                        | 1 januari-mars                          |           |
|                                             | 2 april-maj                             |           |
|                                             | 3 juni-augusti                          |           |
|                                             | 4 september-oktober                     |           |
|                                             | 5 november-december                     |           |
| bv2 belastning vs paoncil halva intervallet | 1 medelbelastning                       |           |
|                                             | 2 underbelastning                       |           |
|                                             | 3 överbelastning                        |           |
| holiday större helg                         | 1 ingen större helg                     |           |
|                                             | 2 större helg (påsk/midsommar/julonyår) |           |

## Categorical Variables Codings

|                                             |                                         | Parameter |
|---------------------------------------------|-----------------------------------------|-----------|
|                                             |                                         | (17)      |
|                                             | 404060001                               | ,000      |
|                                             | 404060002                               | ,000      |
|                                             | 404310003                               | ,000      |
|                                             | 404310004                               | ,000      |
|                                             | 502300005                               | ,000      |
|                                             | 502300006                               | ,000      |
|                                             | 502300007                               | ,000      |
|                                             | 502300214                               | ,000      |
|                                             | 502300411                               | ,000      |
|                                             | 502300415                               | ,000      |
|                                             | 502300416                               | ,000      |
|                                             | 502300811                               | ,000      |
|                                             | 502300913                               | ,000      |
| weekday veckodag                            | 1 måndag                                |           |
|                                             | 2 tisdag                                |           |
|                                             | 3 onsdag                                |           |
|                                             | 4 torsdag                               |           |
|                                             | 5 fredag                                |           |
|                                             | 6 lördag                                |           |
|                                             | 7 söndag                                |           |
| season säsong/period                        | 1 januari-mars                          |           |
|                                             | 2 april-maj                             |           |
|                                             | 3 juni-augusti                          |           |
|                                             | 4 september-oktober                     |           |
|                                             | 5 november-december                     |           |
| bv2 belastning vs paoncil halva intervallet | 1 medelbelastning                       |           |
|                                             | 2 underbelastning                       |           |
|                                             | 3 överbelastning                        |           |
| holiday större helg                         | 1 ingen större helg                     |           |
|                                             | 2 större helg (påsk/midsommar/julonyår) |           |

## Categorical Variables Codings

|                                             |                                         | Parameter |
|---------------------------------------------|-----------------------------------------|-----------|
|                                             |                                         | (18)      |
|                                             | 404060001                               | ,000      |
|                                             | 404060002                               | ,000      |
|                                             | 404310003                               | ,000      |
|                                             | 404310004                               | ,000      |
|                                             | 502300005                               | ,000      |
|                                             | 502300006                               | ,000      |
|                                             | 502300007                               | ,000      |
|                                             | 502300214                               | ,000      |
|                                             | 502300411                               | ,000      |
|                                             | 502300415                               | ,000      |
|                                             | 502300416                               | ,000      |
|                                             | 502300811                               | ,000      |
|                                             | 502300913                               | ,000      |
| weekday veckodag                            | 1 måndag                                |           |
|                                             | 2 tisdag                                |           |
|                                             | 3 onsdag                                |           |
|                                             | 4 torsdag                               |           |
|                                             | 5 fredag                                |           |
|                                             | 6 lördag                                |           |
|                                             | 7 söndag                                |           |
| season säsong/period                        | 1 januari-mars                          |           |
|                                             | 2 april-maj                             |           |
|                                             | 3 juni-augusti                          |           |
|                                             | 4 september-oktober                     |           |
|                                             | 5 november-december                     |           |
| bv2 belastning vs paoncil halva intervallet | 1 medelbelastning                       |           |
|                                             | 2 underbelastning                       |           |
|                                             | 3 överbelastning                        |           |
| holiday större helg                         | 1 ingen större helg                     |           |
|                                             | 2 större helg (påsk/midsommar/julonyår) |           |

## Categorical Variables Codings

|                                             |                                         | Parameter |
|---------------------------------------------|-----------------------------------------|-----------|
|                                             |                                         | (19)      |
|                                             | 404060001                               | ,000      |
|                                             | 404060002                               | ,000      |
|                                             | 404310003                               | ,000      |
|                                             | 404310004                               | ,000      |
|                                             | 502300005                               | ,000      |
|                                             | 502300006                               | ,000      |
|                                             | 502300007                               | ,000      |
|                                             | 502300214                               | ,000      |
|                                             | 502300411                               | ,000      |
|                                             | 502300415                               | ,000      |
|                                             | 502300416                               | ,000      |
|                                             | 502300811                               | ,000      |
|                                             | 502300913                               | ,000      |
| weekday veckodag                            | 1 måndag                                |           |
|                                             | 2 tisdag                                |           |
|                                             | 3 onsdag                                |           |
|                                             | 4 torsdag                               |           |
|                                             | 5 fredag                                |           |
|                                             | 6 lördag                                |           |
|                                             | 7 söndag                                |           |
| season säsong/period                        | 1 januari-mars                          |           |
|                                             | 2 april-maj                             |           |
|                                             | 3 juni-augusti                          |           |
|                                             | 4 september-oktober                     |           |
|                                             | 5 november-december                     |           |
| bv2 belastning vs paoncil halva intervallet | 1 medelbelastning                       |           |
|                                             | 2 underbelastning                       |           |
|                                             | 3 överbelastning                        |           |
| holiday större helg                         | 1 ingen större helg                     |           |
|                                             | 2 större helg (påsk/midsommar/julonyår) |           |



## Categorical Variables Codings

|                                             |                                         | Parameter |
|---------------------------------------------|-----------------------------------------|-----------|
|                                             |                                         | (20)      |
|                                             | 404060001                               | ,000      |
|                                             | 404060002                               | ,000      |
|                                             | 404310003                               | ,000      |
|                                             | 404310004                               | ,000      |
|                                             | 502300005                               | ,000      |
|                                             | 502300006                               | ,000      |
|                                             | 502300007                               | ,000      |
|                                             | 502300214                               | ,000      |
|                                             | 502300411                               | ,000      |
|                                             | 502300415                               | ,000      |
|                                             | 502300416                               | ,000      |
|                                             | 502300811                               | ,000      |
|                                             | 502300913                               | ,000      |
| weekday veckodag                            | 1 måndag                                |           |
|                                             | 2 tisdag                                |           |
|                                             | 3 onsdag                                |           |
|                                             | 4 torsdag                               |           |
|                                             | 5 fredag                                |           |
|                                             | 6 lördag                                |           |
|                                             | 7 söndag                                |           |
| season säsong/period                        | 1 januari-mars                          |           |
|                                             | 2 april-maj                             |           |
|                                             | 3 juni-augusti                          |           |
|                                             | 4 september-oktober                     |           |
|                                             | 5 november-december                     |           |
| bv2 belastning vs paoncil halva intervallet | 1 medelbelastning                       |           |
|                                             | 2 underbelastning                       |           |
|                                             | 3 överbelastning                        |           |
| holiday större helg                         | 1 ingen större helg                     |           |
|                                             | 2 större helg (påsk/midsommar/julonyår) |           |

## Categorical Variables Codings

|                                             |                                         | Parameter |
|---------------------------------------------|-----------------------------------------|-----------|
|                                             |                                         | (21)      |
|                                             | 404060001                               | ,000      |
|                                             | 404060002                               | ,000      |
|                                             | 404310003                               | ,000      |
|                                             | 404310004                               | ,000      |
|                                             | 502300005                               | ,000      |
|                                             | 502300006                               | ,000      |
|                                             | 502300007                               | ,000      |
|                                             | 502300214                               | ,000      |
|                                             | 502300411                               | ,000      |
|                                             | 502300415                               | ,000      |
|                                             | 502300416                               | ,000      |
|                                             | 502300811                               | ,000      |
|                                             | 502300913                               | ,000      |
| weekday veckodag                            | 1 måndag                                |           |
|                                             | 2 tisdag                                |           |
|                                             | 3 onsdag                                |           |
|                                             | 4 torsdag                               |           |
|                                             | 5 fredag                                |           |
|                                             | 6 lördag                                |           |
|                                             | 7 söndag                                |           |
| season säsong/period                        | 1 januari-mars                          |           |
|                                             | 2 april-maj                             |           |
|                                             | 3 juni-augusti                          |           |
|                                             | 4 september-oktober                     |           |
|                                             | 5 november-december                     |           |
| bv2 belastning vs paoncil halva intervallet | 1 medelbelastning                       |           |
|                                             | 2 underbelastning                       |           |
|                                             | 3 överbelastning                        |           |
| holiday större helg                         | 1 ingen större helg                     |           |
|                                             | 2 större helg (påsk/midsommar/julonyår) |           |

**Categorical Variables Codings**

|                                             |                                         | Parameter |
|---------------------------------------------|-----------------------------------------|-----------|
|                                             |                                         | (22)      |
|                                             | 404060001                               | ,000      |
|                                             | 404060002                               | ,000      |
|                                             | 404310003                               | ,000      |
|                                             | 404310004                               | ,000      |
|                                             | 502300005                               | ,000      |
|                                             | 502300006                               | ,000      |
|                                             | 502300007                               | ,000      |
|                                             | 502300214                               | ,000      |
|                                             | 502300411                               | ,000      |
|                                             | 502300415                               | ,000      |
|                                             | 502300416                               | ,000      |
|                                             | 502300811                               | ,000      |
|                                             | 502300913                               | ,000      |
| weekday veckodag                            | 1 måndag                                |           |
|                                             | 2 tisdag                                |           |
|                                             | 3 onsdag                                |           |
|                                             | 4 torsdag                               |           |
|                                             | 5 fredag                                |           |
|                                             | 6 lördag                                |           |
|                                             | 7 söndag                                |           |
| season säsong/period                        | 1 januari-mars                          |           |
|                                             | 2 april-maj                             |           |
|                                             | 3 juni-augusti                          |           |
|                                             | 4 september-oktober                     |           |
|                                             | 5 november-december                     |           |
| bv2 belastning vs paoncil halva intervallet | 1 medelbelastning                       |           |
|                                             | 2 underbelastning                       |           |
|                                             | 3 överbelastning                        |           |
| holiday större helg                         | 1 ingen större helg                     |           |
|                                             | 2 större helg (påsk/midsommar/julonyår) |           |

## Categorical Variables Codings

|                                             |                                         | Parameter |
|---------------------------------------------|-----------------------------------------|-----------|
|                                             |                                         | (23)      |
|                                             | 404060001                               | 1,000     |
|                                             | 404060002                               | ,000      |
|                                             | 404310003                               | ,000      |
|                                             | 404310004                               | ,000      |
|                                             | 502300005                               | ,000      |
|                                             | 502300006                               | ,000      |
|                                             | 502300007                               | ,000      |
|                                             | 502300214                               | ,000      |
|                                             | 502300411                               | ,000      |
|                                             | 502300415                               | ,000      |
|                                             | 502300416                               | ,000      |
|                                             | 502300811                               | ,000      |
|                                             | 502300913                               | ,000      |
| weekday veckodag                            | 1 måndag                                |           |
|                                             | 2 tisdag                                |           |
|                                             | 3 onsdag                                |           |
|                                             | 4 torsdag                               |           |
|                                             | 5 fredag                                |           |
|                                             | 6 lördag                                |           |
|                                             | 7 söndag                                |           |
| season säsong/period                        | 1 januari-mars                          |           |
|                                             | 2 april-maj                             |           |
|                                             | 3 juni-augusti                          |           |
|                                             | 4 september-oktober                     |           |
|                                             | 5 november-december                     |           |
| bv2 belastning vs paoncil halva intervallet | 1 medelbelastning                       |           |
|                                             | 2 underbelastning                       |           |
|                                             | 3 överbelastning                        |           |
| holiday större helg                         | 1 ingen större helg                     |           |
|                                             | 2 större helg (påsk/midsommar/julonyår) |           |

## Categorical Variables Codings

|                                             |                                         | Parameter |
|---------------------------------------------|-----------------------------------------|-----------|
|                                             |                                         | (24)      |
|                                             | 404060001                               | ,000      |
|                                             | 404060002                               | 1,000     |
|                                             | 404310003                               | ,000      |
|                                             | 404310004                               | ,000      |
|                                             | 502300005                               | ,000      |
|                                             | 502300006                               | ,000      |
|                                             | 502300007                               | ,000      |
|                                             | 502300214                               | ,000      |
|                                             | 502300411                               | ,000      |
|                                             | 502300415                               | ,000      |
|                                             | 502300416                               | ,000      |
|                                             | 502300811                               | ,000      |
|                                             | 502300913                               | ,000      |
| weekday veckodag                            | 1 måndag                                |           |
|                                             | 2 tisdag                                |           |
|                                             | 3 onsdag                                |           |
|                                             | 4 torsdag                               |           |
|                                             | 5 fredag                                |           |
|                                             | 6 lördag                                |           |
|                                             | 7 söndag                                |           |
| season säsong/period                        | 1 januari-mars                          |           |
|                                             | 2 april-maj                             |           |
|                                             | 3 juni-augusti                          |           |
|                                             | 4 september-oktober                     |           |
|                                             | 5 november-december                     |           |
| bv2 belastning vs paoncil halva intervallet | 1 medelbelastning                       |           |
|                                             | 2 underbelastning                       |           |
|                                             | 3 överbelastning                        |           |
| holiday större helg                         | 1 ingen större helg                     |           |
|                                             | 2 större helg (påsk/midsommar/julonyår) |           |

## Categorical Variables Codings

|                                             |                                         | Parameter |
|---------------------------------------------|-----------------------------------------|-----------|
|                                             |                                         | (25)      |
|                                             | 404060001                               | ,000      |
|                                             | 404060002                               | ,000      |
|                                             | 404310003                               | 1,000     |
|                                             | 404310004                               | ,000      |
|                                             | 502300005                               | ,000      |
|                                             | 502300006                               | ,000      |
|                                             | 502300007                               | ,000      |
|                                             | 502300214                               | ,000      |
|                                             | 502300411                               | ,000      |
|                                             | 502300415                               | ,000      |
|                                             | 502300416                               | ,000      |
|                                             | 502300811                               | ,000      |
|                                             | 502300913                               | ,000      |
| weekday veckodag                            | 1 måndag                                |           |
|                                             | 2 tisdag                                |           |
|                                             | 3 onsdag                                |           |
|                                             | 4 torsdag                               |           |
|                                             | 5 fredag                                |           |
|                                             | 6 lördag                                |           |
|                                             | 7 söndag                                |           |
| season säsong/period                        | 1 januari-mars                          |           |
|                                             | 2 april-maj                             |           |
|                                             | 3 juni-augusti                          |           |
|                                             | 4 september-oktober                     |           |
|                                             | 5 november-december                     |           |
| bv2 belastning vs paoncil halva intervallet | 1 medelbelastning                       |           |
|                                             | 2 underbelastning                       |           |
|                                             | 3 överbelastning                        |           |
| holiday större helg                         | 1 ingen större helg                     |           |
|                                             | 2 större helg (påsk/midsommar/julonyår) |           |

## Categorical Variables Codings

|                                             |                                         | Parameter |
|---------------------------------------------|-----------------------------------------|-----------|
|                                             |                                         | (26)      |
|                                             | 404060001                               | ,000      |
|                                             | 404060002                               | ,000      |
|                                             | 404310003                               | ,000      |
|                                             | 404310004                               | 1,000     |
|                                             | 502300005                               | ,000      |
|                                             | 502300006                               | ,000      |
|                                             | 502300007                               | ,000      |
|                                             | 502300214                               | ,000      |
|                                             | 502300411                               | ,000      |
|                                             | 502300415                               | ,000      |
|                                             | 502300416                               | ,000      |
|                                             | 502300811                               | ,000      |
|                                             | 502300913                               | ,000      |
| weekday veckodag                            | 1 måndag                                |           |
|                                             | 2 tisdag                                |           |
|                                             | 3 onsdag                                |           |
|                                             | 4 torsdag                               |           |
|                                             | 5 fredag                                |           |
|                                             | 6 lördag                                |           |
|                                             | 7 söndag                                |           |
| season säsong/period                        | 1 januari-mars                          |           |
|                                             | 2 april-maj                             |           |
|                                             | 3 juni-augusti                          |           |
|                                             | 4 september-oktober                     |           |
|                                             | 5 november-december                     |           |
| bv2 belastning vs paoncil halva intervallet | 1 medelbelastning                       |           |
|                                             | 2 underbelastning                       |           |
|                                             | 3 överbelastning                        |           |
| holiday större helg                         | 1 ingen större helg                     |           |
|                                             | 2 större helg (påsk/midsommar/julonyår) |           |

## Categorical Variables Codings

|                                             |                                         | Parameter |
|---------------------------------------------|-----------------------------------------|-----------|
|                                             |                                         | (27)      |
|                                             | 404060001                               | ,000      |
|                                             | 404060002                               | ,000      |
|                                             | 404310003                               | ,000      |
|                                             | 404310004                               | ,000      |
|                                             | 502300005                               | 1,000     |
|                                             | 502300006                               | ,000      |
|                                             | 502300007                               | ,000      |
|                                             | 502300214                               | ,000      |
|                                             | 502300411                               | ,000      |
|                                             | 502300415                               | ,000      |
|                                             | 502300416                               | ,000      |
|                                             | 502300811                               | ,000      |
|                                             | 502300913                               | ,000      |
| weekday veckodag                            | 1 måndag                                |           |
|                                             | 2 tisdag                                |           |
|                                             | 3 onsdag                                |           |
|                                             | 4 torsdag                               |           |
|                                             | 5 fredag                                |           |
|                                             | 6 lördag                                |           |
|                                             | 7 söndag                                |           |
| season säsong/period                        | 1 januari-mars                          |           |
|                                             | 2 april-maj                             |           |
|                                             | 3 juni-augusti                          |           |
|                                             | 4 september-oktober                     |           |
|                                             | 5 november-december                     |           |
| bv2 belastning vs paoncil halva intervallet | 1 medelbelastning                       |           |
|                                             | 2 underbelastning                       |           |
|                                             | 3 överbelastning                        |           |
| holiday större helg                         | 1 ingen större helg                     |           |
|                                             | 2 större helg (påsk/midsommar/julonyår) |           |



## Categorical Variables Codings

|                                             |                                         | Parameter |
|---------------------------------------------|-----------------------------------------|-----------|
|                                             |                                         | (28)      |
|                                             | 404060001                               | ,000      |
|                                             | 404060002                               | ,000      |
|                                             | 404310003                               | ,000      |
|                                             | 404310004                               | ,000      |
|                                             | 502300005                               | ,000      |
|                                             | 502300006                               | 1,000     |
|                                             | 502300007                               | ,000      |
|                                             | 502300214                               | ,000      |
|                                             | 502300411                               | ,000      |
|                                             | 502300415                               | ,000      |
|                                             | 502300416                               | ,000      |
|                                             | 502300811                               | ,000      |
|                                             | 502300913                               | ,000      |
| weekday veckodag                            | 1 måndag                                |           |
|                                             | 2 tisdag                                |           |
|                                             | 3 onsdag                                |           |
|                                             | 4 torsdag                               |           |
|                                             | 5 fredag                                |           |
|                                             | 6 lördag                                |           |
|                                             | 7 söndag                                |           |
| season säsong/period                        | 1 januari-mars                          |           |
|                                             | 2 april-maj                             |           |
|                                             | 3 juni-augusti                          |           |
|                                             | 4 september-oktober                     |           |
|                                             | 5 november-december                     |           |
| bv2 belastning vs paoncil halva intervallet | 1 medelbelastning                       |           |
|                                             | 2 underbelastning                       |           |
|                                             | 3 överbelastning                        |           |
| holiday större helg                         | 1 ingen större helg                     |           |
|                                             | 2 större helg (påsk/midsommar/julonyår) |           |

## Categorical Variables Codings

|                                             |                                         | Parameter |
|---------------------------------------------|-----------------------------------------|-----------|
|                                             |                                         | (29)      |
|                                             | 404060001                               | ,000      |
|                                             | 404060002                               | ,000      |
|                                             | 404310003                               | ,000      |
|                                             | 404310004                               | ,000      |
|                                             | 502300005                               | ,000      |
|                                             | 502300006                               | ,000      |
|                                             | 502300007                               | 1,000     |
|                                             | 502300214                               | ,000      |
|                                             | 502300411                               | ,000      |
|                                             | 502300415                               | ,000      |
|                                             | 502300416                               | ,000      |
|                                             | 502300811                               | ,000      |
|                                             | 502300913                               | ,000      |
| weekday veckodag                            | 1 måndag                                |           |
|                                             | 2 tisdag                                |           |
|                                             | 3 onsdag                                |           |
|                                             | 4 torsdag                               |           |
|                                             | 5 fredag                                |           |
|                                             | 6 lördag                                |           |
|                                             | 7 söndag                                |           |
| season säsong/period                        | 1 januari-mars                          |           |
|                                             | 2 april-maj                             |           |
|                                             | 3 juni-augusti                          |           |
|                                             | 4 september-oktober                     |           |
|                                             | 5 november-december                     |           |
| bv2 belastning vs paoncil halva intervallet | 1 medelbelastning                       |           |
|                                             | 2 underbelastning                       |           |
|                                             | 3 överbelastning                        |           |
| holiday större helg                         | 1 ingen större helg                     |           |
|                                             | 2 större helg (påsk/midsommar/julonyår) |           |

## Categorical Variables Codings

|                                             |                                         | Parameter |
|---------------------------------------------|-----------------------------------------|-----------|
|                                             |                                         | (30)      |
|                                             | 404060001                               | ,000      |
|                                             | 404060002                               | ,000      |
|                                             | 404310003                               | ,000      |
|                                             | 404310004                               | ,000      |
|                                             | 502300005                               | ,000      |
|                                             | 502300006                               | ,000      |
|                                             | 502300007                               | ,000      |
|                                             | 502300214                               | 1,000     |
|                                             | 502300411                               | ,000      |
|                                             | 502300415                               | ,000      |
|                                             | 502300416                               | ,000      |
|                                             | 502300811                               | ,000      |
|                                             | 502300913                               | ,000      |
| weekday veckodag                            | 1 måndag                                |           |
|                                             | 2 tisdag                                |           |
|                                             | 3 onsdag                                |           |
|                                             | 4 torsdag                               |           |
|                                             | 5 fredag                                |           |
|                                             | 6 lördag                                |           |
|                                             | 7 söndag                                |           |
| season säsong/period                        | 1 januari-mars                          |           |
|                                             | 2 april-maj                             |           |
|                                             | 3 juni-augusti                          |           |
|                                             | 4 september-oktober                     |           |
|                                             | 5 november-december                     |           |
| bv2 belastning vs paoncil halva intervallet | 1 medelbelastning                       |           |
|                                             | 2 underbelastning                       |           |
|                                             | 3 överbelastning                        |           |
| holiday större helg                         | 1 ingen större helg                     |           |
|                                             | 2 större helg (påsk/midsommar/julonyår) |           |

## Categorical Variables Codings

|                                             |                                         | Parameter |
|---------------------------------------------|-----------------------------------------|-----------|
|                                             |                                         | (31)      |
|                                             | 404060001                               | ,000      |
|                                             | 404060002                               | ,000      |
|                                             | 404310003                               | ,000      |
|                                             | 404310004                               | ,000      |
|                                             | 502300005                               | ,000      |
|                                             | 502300006                               | ,000      |
|                                             | 502300007                               | ,000      |
|                                             | 502300214                               | ,000      |
|                                             | 502300411                               | 1,000     |
|                                             | 502300415                               | ,000      |
|                                             | 502300416                               | ,000      |
|                                             | 502300811                               | ,000      |
|                                             | 502300913                               | ,000      |
| weekday veckodag                            | 1 måndag                                |           |
|                                             | 2 tisdag                                |           |
|                                             | 3 onsdag                                |           |
|                                             | 4 torsdag                               |           |
|                                             | 5 fredag                                |           |
|                                             | 6 lördag                                |           |
|                                             | 7 söndag                                |           |
| season säsong/period                        | 1 januari-mars                          |           |
|                                             | 2 april-maj                             |           |
|                                             | 3 juni-augusti                          |           |
|                                             | 4 september-oktober                     |           |
|                                             | 5 november-december                     |           |
| bv2 belastning vs paoncil halva intervallet | 1 medelbelastning                       |           |
|                                             | 2 underbelastning                       |           |
|                                             | 3 överbelastning                        |           |
| holiday större helg                         | 1 ingen större helg                     |           |
|                                             | 2 större helg (påsk/midsommar/julonyår) |           |

## Categorical Variables Codings

|                                             |                                         | Parameter |
|---------------------------------------------|-----------------------------------------|-----------|
|                                             |                                         | (32)      |
|                                             | 404060001                               | ,000      |
|                                             | 404060002                               | ,000      |
|                                             | 404310003                               | ,000      |
|                                             | 404310004                               | ,000      |
|                                             | 502300005                               | ,000      |
|                                             | 502300006                               | ,000      |
|                                             | 502300007                               | ,000      |
|                                             | 502300214                               | ,000      |
|                                             | 502300411                               | ,000      |
|                                             | 502300415                               | 1,000     |
|                                             | 502300416                               | ,000      |
|                                             | 502300811                               | ,000      |
|                                             | 502300913                               | ,000      |
| weekday veckodag                            | 1 måndag                                |           |
|                                             | 2 tisdag                                |           |
|                                             | 3 onsdag                                |           |
|                                             | 4 torsdag                               |           |
|                                             | 5 fredag                                |           |
|                                             | 6 lördag                                |           |
|                                             | 7 söndag                                |           |
| season säsong/period                        | 1 januari-mars                          |           |
|                                             | 2 april-maj                             |           |
|                                             | 3 juni-augusti                          |           |
|                                             | 4 september-oktober                     |           |
|                                             | 5 november-december                     |           |
| bv2 belastning vs paoncil halva intervallet | 1 medelbelastning                       |           |
|                                             | 2 underbelastning                       |           |
|                                             | 3 överbelastning                        |           |
| holiday större helg                         | 1 ingen större helg                     |           |
|                                             | 2 större helg (påsk/midsommar/julonyår) |           |

## Categorical Variables Codings

|                                             |                                         | Parameter |
|---------------------------------------------|-----------------------------------------|-----------|
|                                             |                                         | (33)      |
|                                             | 404060001                               | ,000      |
|                                             | 404060002                               | ,000      |
|                                             | 404310003                               | ,000      |
|                                             | 404310004                               | ,000      |
|                                             | 502300005                               | ,000      |
|                                             | 502300006                               | ,000      |
|                                             | 502300007                               | ,000      |
|                                             | 502300214                               | ,000      |
|                                             | 502300411                               | ,000      |
|                                             | 502300415                               | ,000      |
|                                             | 502300416                               | 1,000     |
|                                             | 502300811                               | ,000      |
|                                             | 502300913                               | ,000      |
| weekday veckodag                            | 1 måndag                                |           |
|                                             | 2 tisdag                                |           |
|                                             | 3 onsdag                                |           |
|                                             | 4 torsdag                               |           |
|                                             | 5 fredag                                |           |
|                                             | 6 lördag                                |           |
|                                             | 7 söndag                                |           |
| season säsong/period                        | 1 januari-mars                          |           |
|                                             | 2 april-maj                             |           |
|                                             | 3 juni-augusti                          |           |
|                                             | 4 september-oktober                     |           |
|                                             | 5 november-december                     |           |
| bv2 belastning vs paoncil halva intervallet | 1 medelbelastning                       |           |
|                                             | 2 underbelastning                       |           |
|                                             | 3 överbelastning                        |           |
| holiday större helg                         | 1 ingen större helg                     |           |
|                                             | 2 större helg (påsk/midsommar/julonyår) |           |

## Categorical Variables Codings

|                                             |                                         | Parameter |
|---------------------------------------------|-----------------------------------------|-----------|
|                                             |                                         | (34)      |
|                                             | 404060001                               | ,000      |
|                                             | 404060002                               | ,000      |
|                                             | 404310003                               | ,000      |
|                                             | 404310004                               | ,000      |
|                                             | 502300005                               | ,000      |
|                                             | 502300006                               | ,000      |
|                                             | 502300007                               | ,000      |
|                                             | 502300214                               | ,000      |
|                                             | 502300411                               | ,000      |
|                                             | 502300415                               | ,000      |
|                                             | 502300416                               | ,000      |
|                                             | 502300811                               | 1,000     |
|                                             | 502300913                               | ,000      |
| weekday veckodag                            | 1 måndag                                |           |
|                                             | 2 tisdag                                |           |
|                                             | 3 onsdag                                |           |
|                                             | 4 torsdag                               |           |
|                                             | 5 fredag                                |           |
|                                             | 6 lördag                                |           |
|                                             | 7 söndag                                |           |
| season säsong/period                        | 1 januari-mars                          |           |
|                                             | 2 april-maj                             |           |
|                                             | 3 juni-augusti                          |           |
|                                             | 4 september-oktober                     |           |
|                                             | 5 november-december                     |           |
| bv2 belastning vs paoncil halva intervallet | 1 medelbelastning                       |           |
|                                             | 2 underbelastning                       |           |
|                                             | 3 överbelastning                        |           |
| holiday större helg                         | 1 ingen större helg                     |           |
|                                             | 2 större helg (påsk/midsommar/julonyår) |           |

## Categorical Variables Codings

|                                             |                                         | Paramete... |
|---------------------------------------------|-----------------------------------------|-------------|
|                                             |                                         | (35)        |
|                                             | 404060001                               | ,000        |
|                                             | 404060002                               | ,000        |
|                                             | 404310003                               | ,000        |
|                                             | 404310004                               | ,000        |
|                                             | 502300005                               | ,000        |
|                                             | 502300006                               | ,000        |
|                                             | 502300007                               | ,000        |
|                                             | 502300214                               | ,000        |
|                                             | 502300411                               | ,000        |
|                                             | 502300415                               | ,000        |
|                                             | 502300416                               | ,000        |
|                                             | 502300811                               | ,000        |
|                                             | 502300913                               | 1,000       |
| weekday veckodag                            | 1 måndag                                |             |
|                                             | 2 tisdag                                |             |
|                                             | 3 onsdag                                |             |
|                                             | 4 torsdag                               |             |
|                                             | 5 fredag                                |             |
|                                             | 6 lördag                                |             |
|                                             | 7 söndag                                |             |
| season säsong/period                        | 1 januari-mars                          |             |
|                                             | 2 april-maj                             |             |
|                                             | 3 juni-augusti                          |             |
|                                             | 4 september-oktober                     |             |
|                                             | 5 november-december                     |             |
| bv2 belastning vs paoncil halva intervallet | 1 medelbelastning                       |             |
|                                             | 2 underbelastning                       |             |
|                                             | 3 överbelastning                        |             |
| holiday större helg                         | 1 ingen större helg                     |             |
|                                             | 2 större helg (påsk/midsommar/julonyår) |             |

**Block 0: Beginning Block**



Classification Table<sup>a,b</sup>

| Observed           |                             |                      | Predicted                   |                      |
|--------------------|-----------------------------|----------------------|-----------------------------|----------------------|
|                    |                             |                      | dod01 dödsfall ja eller nej |                      |
|                    |                             |                      | 0 inget dödsfall            | 1 minst ett dödsfall |
| Step 0             | dod01 dödsfall ja eller nej | 0 inget dödsfall     | 11839                       | 0                    |
|                    |                             | 1 minst ett dödsfall | 636                         | 0                    |
| Overall Percentage |                             |                      |                             |                      |

Classification Table<sup>a,b</sup>

| Observed           |                             |                      | Predicted          |
|--------------------|-----------------------------|----------------------|--------------------|
|                    |                             |                      | Percentage Correct |
| Step 0             | dod01 dödsfall ja eller nej | 0 inget dödsfall     | 100,0              |
|                    |                             | 1 minst ett dödsfall | ,0                 |
| Overall Percentage |                             |                      | 94,9               |

a. Constant is included in the model.

b. The cut value is ,500

Variables in the Equation

|                 | B      | S.E. | Wald     | df | Sig. | Exp(B) |
|-----------------|--------|------|----------|----|------|--------|
| Step 0 Constant | -2,924 | ,041 | 5160,279 | 1  | ,000 | ,054   |

## Variables not in the Equation

|        |           |            | Score   | df | Sig. |
|--------|-----------|------------|---------|----|------|
| Step 0 | Variables | bv2        | 54,080  | 2  | ,000 |
|        |           | bv2(1)     | 43,266  | 1  | ,000 |
|        |           | bv2(2)     | 45,028  | 1  | ,000 |
|        |           | VASTY2     | 635,545 | 35 | ,000 |
|        |           | VASTY2(1)  | 2,519   | 1  | ,113 |
|        |           | VASTY2(2)  | 6,299   | 1  | ,012 |
|        |           | VASTY2(3)  | 8,957   | 1  | ,003 |
|        |           | VASTY2(4)  | ,151    | 1  | ,698 |
|        |           | VASTY2(5)  | 7,537   | 1  | ,006 |
|        |           | VASTY2(6)  | 20,142  | 1  | ,000 |
|        |           | VASTY2(7)  | 127,387 | 1  | ,000 |
|        |           | VASTY2(8)  | 8,957   | 1  | ,003 |
|        |           | VASTY2(9)  | ,163    | 1  | ,687 |
|        |           | VASTY2(10) | 7,570   | 1  | ,006 |
|        |           | VASTY2(11) | ,113    | 1  | ,737 |
|        |           | VASTY2(12) | 47,021  | 1  | ,000 |
|        |           | VASTY2(13) | 90,515  | 1  | ,000 |
|        |           | VASTY2(14) | 7,570   | 1  | ,006 |
|        |           | VASTY2(15) | ,151    | 1  | ,698 |
|        |           | VASTY2(16) | 4,298   | 1  | ,038 |
|        |           | VASTY2(17) | 20,199  | 1  | ,000 |
|        |           | VASTY2(18) | 17,916  | 1  | ,000 |
|        |           | VASTY2(19) | 18,086  | 1  | ,000 |
|        |           | VASTY2(20) | 10,563  | 1  | ,001 |
|        |           | VASTY2(21) | 1,696   | 1  | ,193 |
|        |           | VASTY2(22) | 26,693  | 1  | ,000 |
|        |           | VASTY2(23) | 1,125   | 1  | ,289 |
|        |           | VASTY2(24) | 72,662  | 1  | ,000 |
|        |           | VASTY2(25) | 2,477   | 1  | ,116 |
|        |           | VASTY2(26) | 16,006  | 1  | ,000 |
|        |           | VASTY2(27) | 20,256  | 1  | ,000 |
|        |           | VASTY2(28) | 12,309  | 1  | ,000 |
|        |           | VASTY2(29) | 20,256  | 1  | ,000 |
|        |           | VASTY2(30) | 1,263   | 1  | ,261 |
|        |           | VASTY2(31) | 20,256  | 1  | ,000 |
|        |           | VASTY2(32) | 15,810  | 1  | ,000 |
|        |           | VASTY2(33) | 17,973  | 1  | ,000 |
|        |           | VASTY2(34) | ,693    | 1  | ,405 |
|        |           | VASTY2(35) | 17,360  | 1  | ,000 |
|        |           | weekday    | 2,920   | 6  | ,819 |
|        |           | weekday(1) | ,422    | 1  | ,516 |
|        |           | weekday(2) | ,103    | 1  | ,749 |
|        |           | weekday(3) | ,575    | 1  | ,448 |

## Variables not in the Equation

|                    | Score   | df | Sig. |
|--------------------|---------|----|------|
| weekday(4)         | ,109    | 1  | ,741 |
| weekday(5)         | ,165    | 1  | ,685 |
| weekday(6)         | 1,908   | 1  | ,167 |
| holiday(1)         | ,270    | 1  | ,603 |
| season             | 9,040   | 4  | ,060 |
| season(1)          | ,504    | 1  | ,478 |
| season(2)          | 2,866   | 1  | ,090 |
| season(3)          | ,328    | 1  | ,567 |
| season(4)          | 7,145   | 1  | ,008 |
| Overall Statistics | 662,351 | 48 | ,000 |

## Block 1: Method = Enter

## Omnibus Tests of Model Coefficients

|             | Chi-square | df | Sig. |
|-------------|------------|----|------|
| Step 1 Step | 732,200    | 48 | ,000 |
| Block       | 732,200    | 48 | ,000 |
| Model       | 732,200    | 48 | ,000 |

## Model Summary

| Step | -2 Log likelihood     | Cox & Snell R Square | Nagelkerke R Square |
|------|-----------------------|----------------------|---------------------|
| 1    | 4292,643 <sup>a</sup> | ,057                 | ,172                |

a. Estimation terminated at iteration number 20 because maximum iterations has been reached. Final solution cannot be found.

Classification Table<sup>a</sup>

|                    |                      | Predicted                   |                  |
|--------------------|----------------------|-----------------------------|------------------|
|                    |                      | dod01 dödsfall ja eller nej | 0 inget dödsfall |
| Observed           | 0 inget dödsfall     | 11839                       | 0                |
|                    | 1 minst ett dödsfall | 636                         | 0                |
| Overall Percentage |                      |                             |                  |

Classification Table<sup>a</sup>

|                    |                      | Predicted        |                      |
|--------------------|----------------------|------------------|----------------------|
|                    |                      | 0 inget dödsfall | 1 minst ett dödsfall |
| Observed           | 0 inget dödsfall     | 100,0            | ,0                   |
|                    | 1 minst ett dödsfall |                  |                      |
| Overall Percentage |                      | 94,9             |                      |

a. The cut value is ,500

## Variables in the Equation

|                         | B       | S.E.     | Wald    | df | Sig. | Exp(B) |
|-------------------------|---------|----------|---------|----|------|--------|
| Step 1 <sup>a</sup> bv2 |         |          | 15,899  | 2  | ,000 |        |
| bv2(1)                  | -,136   | ,126     | 1,154   | 1  | ,283 | ,873   |
| bv2(2)                  | ,297    | ,111     | 7,203   | 1  | ,007 | 1,346  |
| VASTY2                  |         |          | 215,791 | 35 | ,000 |        |
| VASTY2(1)               | ,590    | ,343     | 2,955   | 1  | ,086 | 1,803  |
| VASTY2(2)               | ,718    | ,335     | 4,589   | 1  | ,032 | 2,050  |
| VASTY2(3)               | ,665    | ,334     | 3,958   | 1  | ,047 | 1,945  |
| VASTY2(4)               | ,057    | ,371     | ,024    | 1  | ,877 | 1,059  |
| VASTY2(5)               | -,842   | ,495     | 2,891   | 1  | ,089 | ,431   |
| VASTY2(6)               | -18,087 | 2099,316 | ,000    | 1  | ,993 | ,000   |
| VASTY2(7)               | 1,507   | ,309     | 23,735  | 1  | ,000 | 4,515  |
| VASTY2(8)               | ,742    | ,332     | 4,976   | 1  | ,026 | 2,099  |
| VASTY2(9)               | ,286    | ,362     | ,623    | 1  | ,430 | 1,331  |
| VASTY2(10)              | ,732    | ,334     | 4,810   | 1  | ,028 | 2,079  |
| VASTY2(11)              | ,334    | ,357     | ,872    | 1  | ,350 | 1,396  |
| VASTY2(12)              | 1,227   | ,315     | 15,127  | 1  | ,000 | 3,411  |
| VASTY2(13)              | 1,378   | ,311     | 19,565  | 1  | ,000 | 3,966  |
| VASTY2(14)              | ,704    | ,334     | 4,438   | 1  | ,035 | 2,022  |
| VASTY2(15)              | ,113    | ,370     | ,094    | 1  | ,759 | 1,120  |
| VASTY2(16)              | -,914   | ,644     | 2,011   | 1  | ,156 | ,401   |
| VASTY2(17)              | -17,964 | 2095,460 | ,000    | 1  | ,993 | ,000   |
| VASTY2(18)              | -2,695  | 1,038    | 6,742   | 1  | ,009 | ,068   |
| VASTY2(19)              | -2,518  | 1,040    | 5,863   | 1  | ,015 | ,081   |
| VASTY2(20)              | -1,475  | ,642     | 5,277   | 1  | ,022 | ,229   |
| VASTY2(21)              | ,509    | ,346     | 2,173   | 1  | ,140 | 1,664  |
| VASTY2(22)              | 1,243   | ,322     | 14,890  | 1  | ,000 | 3,467  |
| VASTY2(23)              | ,525    | ,348     | 2,278   | 1  | ,131 | 1,691  |
| VASTY2(24)              | 1,318   | ,312     | 17,795  | 1  | ,000 | 3,735  |
| VASTY2(25)              | -,219   | ,435     | ,252    | 1  | ,616 | ,804   |
| VASTY2(26)              | -18,080 | 2347,813 | ,000    | 1  | ,994 | ,000   |
| VASTY2(27)              | -18,111 | 2093,393 | ,000    | 1  | ,993 | ,000   |
| VASTY2(28)              | -18,082 | 2671,282 | ,000    | 1  | ,995 | ,000   |
| VASTY2(29)              | -18,045 | 2094,144 | ,000    | 1  | ,993 | ,000   |
| VASTY2(30)              | -,064   | ,386     | ,027    | 1  | ,868 | ,938   |
| VASTY2(31)              | -18,032 | 2092,735 | ,000    | 1  | ,993 | ,000   |
| VASTY2(32)              | -1,966  | ,760     | 6,688   | 1  | ,010 | ,140   |
| VASTY2(33)              | -2,688  | 1,038    | 6,703   | 1  | ,010 | ,068   |
| VASTY2(34)              | ,434    | ,351     | 1,530   | 1  | ,216 | 1,543  |
| VASTY2(35)              | -18,128 | 2256,013 | ,000    | 1  | ,994 | ,000   |
| weekday                 |         |          | 3,035   | 6  | ,804 |        |

Variables in the Equation

|                     |            | 95% C.I. for EXP(B) |       |
|---------------------|------------|---------------------|-------|
|                     |            | Lower               | Upper |
| Step 1 <sup>a</sup> | bv2        |                     |       |
|                     | bv2(1)     | ,681                | 1,119 |
|                     | bv2(2)     | 1,083               | 1,671 |
|                     | VASTY2     |                     |       |
|                     | VASTY2(1)  | ,921                | 3,532 |
|                     | VASTY2(2)  | 1,063               | 3,952 |
|                     | VASTY2(3)  | 1,010               | 3,747 |
|                     | VASTY2(4)  | ,512                | 2,191 |
|                     | VASTY2(5)  | ,163                | 1,137 |
|                     | VASTY2(6)  | ,000                | .     |
|                     | VASTY2(7)  | 2,462               | 8,279 |
|                     | VASTY2(8)  | 1,094               | 4,027 |
|                     | VASTY2(9)  | ,654                | 2,706 |
|                     | VASTY2(10) | 1,081               | 3,998 |
|                     | VASTY2(11) | ,693                | 2,812 |
|                     | VASTY2(12) | 1,838               | 6,329 |
|                     | VASTY2(13) | 2,154               | 7,302 |
|                     | VASTY2(14) | 1,050               | 3,892 |
|                     | VASTY2(15) | ,542                | 2,313 |
|                     | VASTY2(16) | ,113                | 1,418 |
|                     | VASTY2(17) | ,000                | .     |
|                     | VASTY2(18) | ,009                | ,516  |
|                     | VASTY2(19) | ,011                | ,619  |
|                     | VASTY2(20) | ,065                | ,805  |
|                     | VASTY2(21) | ,845                | 3,277 |
|                     | VASTY2(22) | 1,844               | 6,518 |
|                     | VASTY2(23) | ,855                | 3,344 |
|                     | VASTY2(24) | 2,025               | 6,890 |
|                     | VASTY2(25) | ,342                | 1,886 |
|                     | VASTY2(26) | ,000                | .     |
|                     | VASTY2(27) | ,000                | .     |
|                     | VASTY2(28) | ,000                | .     |
|                     | VASTY2(29) | ,000                | .     |
|                     | VASTY2(30) | ,440                | 1,999 |
|                     | VASTY2(31) | ,000                | .     |
|                     | VASTY2(32) | ,032                | ,621  |
|                     | VASTY2(33) | ,009                | ,520  |
|                     | VASTY2(34) | ,776                | 3,070 |
|                     | VASTY2(35) | ,000                | .     |
|                     | weekday    |                     |       |

review only

Variables in the Equation

|            | B      | S.E. | Wald    | df | Sig. | Exp(B) |
|------------|--------|------|---------|----|------|--------|
| weekday(1) | ,028   | ,152 | ,035    | 1  | ,853 | 1,029  |
| weekday(2) | -,065  | ,156 | ,174    | 1  | ,677 | ,937   |
| weekday(3) | ,041   | ,153 | ,071    | 1  | ,790 | 1,041  |
| weekday(4) | ,022   | ,154 | ,020    | 1  | ,886 | 1,022  |
| weekday(5) | -,061  | ,158 | ,151    | 1  | ,697 | ,940   |
| weekday(6) | -,192  | ,162 | 1,411   | 1  | ,235 | ,825   |
| holiday(1) | -,240  | ,256 | ,880    | 1  | ,348 | ,787   |
| season     |        |      | 7,122   | 4  | ,130 |        |
| season(1)  | ,034   | ,129 | ,072    | 1  | ,789 | 1,035  |
| season(2)  | ,076   | ,118 | ,412    | 1  | ,521 | 1,079  |
| season(3)  | -,070  | ,132 | ,284    | 1  | ,594 | ,932   |
| season(4)  | -,286  | ,142 | 4,034   | 1  | ,045 | ,751   |
| Constant   | -3,181 | ,308 | 106,553 | 1  | ,000 | ,042   |

Variables in the Equation

|            | 95% C.I. for EXP(B) |       |
|------------|---------------------|-------|
|            | Lower               | Upper |
| weekday(1) | ,763                | 1,387 |
| weekday(2) | ,690                | 1,272 |
| weekday(3) | ,772                | 1,405 |
| weekday(4) | ,756                | 1,383 |
| weekday(5) | ,690                | 1,282 |
| weekday(6) | ,601                | 1,133 |
| holiday(1) | ,476                | 1,299 |
| season     |                     |       |
| season(1)  | ,805                | 1,332 |
| season(2)  | ,856                | 1,360 |
| season(3)  | ,719                | 1,208 |
| season(4)  | ,568                | ,993  |
| Constant   |                     |       |

a. Variable(s) entered on step 1: bv2, VASTY2, weekday, holiday, season.

LOGISTIC REGRESSION VARIABLES dod01

/METHOD=ENTER bv3 VASTY2 weekday holiday season

/CONTRAST (bv3)=Indicator(1)

/CONTRAST (VASTY2)=Indicator(1)

/CONTRAST (weekday)=Indicator(1)

/CONTRAST (holiday)=Indicator(1)

/CONTRAST (season)=Indicator(1)

/PRINT=CI(95)

/CRITERIA=PIN(0.05) POUT(0.10) ITERATE(20) CUT(0.5).

## Logistic Regression

[DataSet6] C:\cWordjan\Rafaela\_VCS\alla\_tillsammans\abo\_bjo\_vasa\_v1.sav

### Case Processing Summary

| Unweighted Cases <sup>a</sup> |                      | N     | Percent |
|-------------------------------|----------------------|-------|---------|
| Selected Cases                | Included in Analysis | 12475 | 100,0   |
|                               | Missing Cases        | 0     | ,0      |
|                               | Total                | 12475 | 100,0   |
| Unselected Cases              |                      | 0     | ,0      |
| Total                         |                      | 12475 | 100,0   |

a. If weight is in effect, see classification table for the total number of cases.

### Dependent Variable Encoding

| Original Value       | Internal Value |
|----------------------|----------------|
| 0 inget dödsfall     | 0              |
| 1 minst ett dödsfall | 1              |

### Categorical Variables Codings

|                           | Frequency |
|---------------------------|-----------|
| VASTY2 (SAIR*10000)+VASTY | 365       |
| 403073101                 | 362       |
| 403073102                 | 365       |
| 403073103                 | 365       |
| 403073202                 | 365       |
| 403073203                 | 365       |
| 403073204                 | 330       |
| 403073303                 | 364       |
| 403073651                 | 362       |
| 403073771                 | 365       |
| 403133102                 | 341       |
| 403133106                 | 365       |
| 403133107                 | 365       |
| 403133109                 | 365       |
| 403133202                 | 365       |
| 403133203                 | 365       |
| 403133204                 | 365       |
| 403133315                 | 177       |
| 403133322                 | 365       |
| 403133401                 | 362       |
| 403133402                 | 365       |
| 403133550                 | 298       |
| 403133772                 | 365       |
| 403135803                 | 365       |

## Categorical Variables Codings

|                           |           | Parameter |
|---------------------------|-----------|-----------|
|                           |           | (1)       |
| VASTY2 (SAIR*10000)+VASTY | 403073101 | ,000      |
|                           | 403073102 | 1,000     |
|                           | 403073103 | ,000      |
|                           | 403073202 | ,000      |
|                           | 403073203 | ,000      |
|                           | 403073204 | ,000      |
|                           | 403073303 | ,000      |
|                           | 403073651 | ,000      |
|                           | 403073771 | ,000      |
|                           | 403133102 | ,000      |
|                           | 403133106 | ,000      |
|                           | 403133107 | ,000      |
|                           | 403133109 | ,000      |
|                           | 403133202 | ,000      |
|                           | 403133203 | ,000      |
|                           | 403133204 | ,000      |
|                           | 403133315 | ,000      |
|                           | 403133322 | ,000      |
|                           | 403133401 | ,000      |
|                           | 403133402 | ,000      |
|                           | 403133550 | ,000      |
|                           | 403133772 | ,000      |
|                           | 403135803 | ,000      |



1  
2  
3  
4  
5  
6  
7  
8  
9  
10  
11  
12  
13  
14  
15  
16  
17  
18  
19  
20  
21  
22  
23  
24  
25  
26  
27  
28  
29  
30  
31  
32  
33  
34  
35  
36  
37  
38  
39  
40  
41  
42  
43  
44  
45  
46  
47  
48  
49  
50  
51  
52  
53  
54  
55  
56  
57  
58  
59  
60

**Categorical Variables Codings**

|                           |           | Parameter |
|---------------------------|-----------|-----------|
|                           |           | (2)       |
| VASTY2 (SAIR*10000)+VASTY | 403073101 | ,000      |
|                           | 403073102 | ,000      |
|                           | 403073103 | 1,000     |
|                           | 403073202 | ,000      |
|                           | 403073203 | ,000      |
|                           | 403073204 | ,000      |
|                           | 403073303 | ,000      |
|                           | 403073651 | ,000      |
|                           | 403073771 | ,000      |
|                           | 403133102 | ,000      |
|                           | 403133106 | ,000      |
|                           | 403133107 | ,000      |
|                           | 403133109 | ,000      |
|                           | 403133202 | ,000      |
|                           | 403133203 | ,000      |
|                           | 403133204 | ,000      |
|                           | 403133315 | ,000      |
|                           | 403133322 | ,000      |
|                           | 403133401 | ,000      |
|                           | 403133402 | ,000      |
|                           | 403133550 | ,000      |
|                           | 403133772 | ,000      |
|                           | 403135803 | ,000      |

For peer review only

## Categorical Variables Codings

|                           |           | Parameter |
|---------------------------|-----------|-----------|
|                           |           | (3)       |
| VASTY2 (SAIR*10000)+VASTY | 403073101 | ,000      |
|                           | 403073102 | ,000      |
|                           | 403073103 | ,000      |
|                           | 403073202 | 1,000     |
|                           | 403073203 | ,000      |
|                           | 403073204 | ,000      |
|                           | 403073303 | ,000      |
|                           | 403073651 | ,000      |
|                           | 403073771 | ,000      |
|                           | 403133102 | ,000      |
|                           | 403133106 | ,000      |
|                           | 403133107 | ,000      |
|                           | 403133109 | ,000      |
|                           | 403133202 | ,000      |
|                           | 403133203 | ,000      |
|                           | 403133204 | ,000      |
|                           | 403133315 | ,000      |
|                           | 403133322 | ,000      |
|                           | 403133401 | ,000      |
|                           | 403133402 | ,000      |
|                           | 403133550 | ,000      |
|                           | 403133772 | ,000      |
|                           | 403135803 | ,000      |

1  
2  
3  
4  
5  
6  
7  
8  
9  
10  
11  
12  
13  
14  
15  
16  
17  
18  
19  
20  
21  
22  
23  
24  
25  
26  
27  
28  
29  
30  
31  
32  
33  
34  
35  
36  
37  
38  
39  
40  
41  
42  
43  
44  
45  
46  
47  
48  
49  
50  
51  
52  
53  
54  
55  
56  
57  
58  
59  
60

**Categorical Variables Codings**

|                           |           | Parameter |
|---------------------------|-----------|-----------|
|                           |           | (4)       |
| VASTY2 (SAIR*10000)+VASTY | 403073101 | ,000      |
|                           | 403073102 | ,000      |
|                           | 403073103 | ,000      |
|                           | 403073202 | ,000      |
|                           | 403073203 | 1,000     |
|                           | 403073204 | ,000      |
|                           | 403073303 | ,000      |
|                           | 403073651 | ,000      |
|                           | 403073771 | ,000      |
|                           | 403133102 | ,000      |
|                           | 403133106 | ,000      |
|                           | 403133107 | ,000      |
|                           | 403133109 | ,000      |
|                           | 403133202 | ,000      |
|                           | 403133203 | ,000      |
|                           | 403133204 | ,000      |
|                           | 403133315 | ,000      |
|                           | 403133322 | ,000      |
|                           | 403133401 | ,000      |
|                           | 403133402 | ,000      |
|                           | 403133550 | ,000      |
|                           | 403133772 | ,000      |
|                           | 403135803 | ,000      |

For peer review only

## Categorical Variables Codings

|                           |           | Parameter |
|---------------------------|-----------|-----------|
|                           |           | (5)       |
| VASTY2 (SAIR*10000)+VASTY | 403073101 | ,000      |
|                           | 403073102 | ,000      |
|                           | 403073103 | ,000      |
|                           | 403073202 | ,000      |
|                           | 403073203 | ,000      |
|                           | 403073204 | 1,000     |
|                           | 403073303 | ,000      |
|                           | 403073651 | ,000      |
|                           | 403073771 | ,000      |
|                           | 403133102 | ,000      |
|                           | 403133106 | ,000      |
|                           | 403133107 | ,000      |
|                           | 403133109 | ,000      |
|                           | 403133202 | ,000      |
|                           | 403133203 | ,000      |
|                           | 403133204 | ,000      |
|                           | 403133315 | ,000      |
|                           | 403133322 | ,000      |
|                           | 403133401 | ,000      |
|                           | 403133402 | ,000      |
|                           | 403133550 | ,000      |
|                           | 403133772 | ,000      |
|                           | 403135803 | ,000      |

## Categorical Variables Codings

|                           |           | Parameter |
|---------------------------|-----------|-----------|
|                           |           | (6)       |
| VASTY2 (SAIR*10000)+VASTY | 403073101 | ,000      |
|                           | 403073102 | ,000      |
|                           | 403073103 | ,000      |
|                           | 403073202 | ,000      |
|                           | 403073203 | ,000      |
|                           | 403073204 | ,000      |
|                           | 403073303 | 1,000     |
|                           | 403073651 | ,000      |
|                           | 403073771 | ,000      |
|                           | 403133102 | ,000      |
|                           | 403133106 | ,000      |
|                           | 403133107 | ,000      |
|                           | 403133109 | ,000      |
|                           | 403133202 | ,000      |
|                           | 403133203 | ,000      |
|                           | 403133204 | ,000      |
|                           | 403133315 | ,000      |
|                           | 403133322 | ,000      |
|                           | 403133401 | ,000      |
|                           | 403133402 | ,000      |
|                           | 403133550 | ,000      |
|                           | 403133772 | ,000      |
|                           | 403135803 | ,000      |

## Categorical Variables Codings

|                           |           | Parameter |
|---------------------------|-----------|-----------|
|                           |           | (7)       |
| VASTY2 (SAIR*10000)+VASTY | 403073101 | ,000      |
|                           | 403073102 | ,000      |
|                           | 403073103 | ,000      |
|                           | 403073202 | ,000      |
|                           | 403073203 | ,000      |
|                           | 403073204 | ,000      |
|                           | 403073303 | ,000      |
|                           | 403073651 | 1,000     |
|                           | 403073771 | ,000      |
|                           | 403133102 | ,000      |
|                           | 403133106 | ,000      |
|                           | 403133107 | ,000      |
|                           | 403133109 | ,000      |
|                           | 403133202 | ,000      |
|                           | 403133203 | ,000      |
|                           | 403133204 | ,000      |
|                           | 403133315 | ,000      |
|                           | 403133322 | ,000      |
|                           | 403133401 | ,000      |
|                           | 403133402 | ,000      |
|                           | 403133550 | ,000      |
|                           | 403133772 | ,000      |
|                           | 403135803 | ,000      |

## Categorical Variables Codings

|                           |           | Parameter |
|---------------------------|-----------|-----------|
|                           |           | (8)       |
| VASTY2 (SAIR*10000)+VASTY | 403073101 | ,000      |
|                           | 403073102 | ,000      |
|                           | 403073103 | ,000      |
|                           | 403073202 | ,000      |
|                           | 403073203 | ,000      |
|                           | 403073204 | ,000      |
|                           | 403073303 | ,000      |
|                           | 403073651 | ,000      |
|                           | 403073771 | 1,000     |
|                           | 403133102 | ,000      |
|                           | 403133106 | ,000      |
|                           | 403133107 | ,000      |
|                           | 403133109 | ,000      |
|                           | 403133202 | ,000      |
|                           | 403133203 | ,000      |
|                           | 403133204 | ,000      |
|                           | 403133315 | ,000      |
|                           | 403133322 | ,000      |
|                           | 403133401 | ,000      |
|                           | 403133402 | ,000      |
|                           | 403133550 | ,000      |
|                           | 403133772 | ,000      |
|                           | 403135803 | ,000      |

## Categorical Variables Codings

|                           |           | Parameter |
|---------------------------|-----------|-----------|
|                           |           | (9)       |
| VASTY2 (SAIR*10000)+VASTY | 403073101 | ,000      |
|                           | 403073102 | ,000      |
|                           | 403073103 | ,000      |
|                           | 403073202 | ,000      |
|                           | 403073203 | ,000      |
|                           | 403073204 | ,000      |
|                           | 403073303 | ,000      |
|                           | 403073651 | ,000      |
|                           | 403073771 | ,000      |
|                           | 403133102 | 1,000     |
|                           | 403133106 | ,000      |
|                           | 403133107 | ,000      |
|                           | 403133109 | ,000      |
|                           | 403133202 | ,000      |
|                           | 403133203 | ,000      |
|                           | 403133204 | ,000      |
|                           | 403133315 | ,000      |
|                           | 403133322 | ,000      |
|                           | 403133401 | ,000      |
|                           | 403133402 | ,000      |
|                           | 403133550 | ,000      |
|                           | 403133772 | ,000      |
|                           | 403135803 | ,000      |



## Categorical Variables Codings

|                           |           | Parameter |
|---------------------------|-----------|-----------|
|                           |           | (10)      |
| VASTY2 (SAIR*10000)+VASTY | 403073101 | ,000      |
|                           | 403073102 | ,000      |
|                           | 403073103 | ,000      |
|                           | 403073202 | ,000      |
|                           | 403073203 | ,000      |
|                           | 403073204 | ,000      |
|                           | 403073303 | ,000      |
|                           | 403073651 | ,000      |
|                           | 403073771 | ,000      |
|                           | 403133102 | ,000      |
|                           | 403133106 | 1,000     |
|                           | 403133107 | ,000      |
|                           | 403133109 | ,000      |
|                           | 403133202 | ,000      |
|                           | 403133203 | ,000      |
|                           | 403133204 | ,000      |
|                           | 403133315 | ,000      |
|                           | 403133322 | ,000      |
|                           | 403133401 | ,000      |
|                           | 403133402 | ,000      |
|                           | 403133550 | ,000      |
|                           | 403133772 | ,000      |
|                           | 403135803 | ,000      |

## Categorical Variables Codings

|                           |           | Parameter |
|---------------------------|-----------|-----------|
|                           |           | (11)      |
| VASTY2 (SAIR*10000)+VASTY | 403073101 | ,000      |
|                           | 403073102 | ,000      |
|                           | 403073103 | ,000      |
|                           | 403073202 | ,000      |
|                           | 403073203 | ,000      |
|                           | 403073204 | ,000      |
|                           | 403073303 | ,000      |
|                           | 403073651 | ,000      |
|                           | 403073771 | ,000      |
|                           | 403133102 | ,000      |
|                           | 403133106 | ,000      |
|                           | 403133107 | 1,000     |
|                           | 403133109 | ,000      |
|                           | 403133202 | ,000      |
|                           | 403133203 | ,000      |
|                           | 403133204 | ,000      |
|                           | 403133315 | ,000      |
|                           | 403133322 | ,000      |
|                           | 403133401 | ,000      |
|                           | 403133402 | ,000      |
|                           | 403133550 | ,000      |
|                           | 403133772 | ,000      |
|                           | 403135803 | ,000      |

1  
2  
3  
4  
5  
6  
7  
8  
9  
10  
11  
12  
13  
14  
15  
16  
17  
18  
19  
20  
21  
22  
23  
24  
25  
26  
27  
28  
29  
30  
31  
32  
33  
34  
35  
36  
37  
38  
39  
40  
41  
42  
43  
44  
45  
46  
47  
48  
49  
50  
51  
52  
53  
54  
55  
56  
57  
58  
59  
60

**Categorical Variables Codings**

|                           |           | Parameter |
|---------------------------|-----------|-----------|
|                           |           | (12)      |
| VASTY2 (SAIR*10000)+VASTY | 403073101 | ,000      |
|                           | 403073102 | ,000      |
|                           | 403073103 | ,000      |
|                           | 403073202 | ,000      |
|                           | 403073203 | ,000      |
|                           | 403073204 | ,000      |
|                           | 403073303 | ,000      |
|                           | 403073651 | ,000      |
|                           | 403073771 | ,000      |
|                           | 403133102 | ,000      |
|                           | 403133106 | ,000      |
|                           | 403133107 | ,000      |
|                           | 403133109 | 1,000     |
|                           | 403133202 | ,000      |
|                           | 403133203 | ,000      |
|                           | 403133204 | ,000      |
|                           | 403133315 | ,000      |
|                           | 403133322 | ,000      |
|                           | 403133401 | ,000      |
|                           | 403133402 | ,000      |
|                           | 403133550 | ,000      |
|                           | 403133772 | ,000      |
|                           | 403135803 | ,000      |

Peer Review Only

## Categorical Variables Codings

|                           |           | Parameter |
|---------------------------|-----------|-----------|
|                           |           | (13)      |
| VASTY2 (SAIR*10000)+VASTY | 403073101 | ,000      |
|                           | 403073102 | ,000      |
|                           | 403073103 | ,000      |
|                           | 403073202 | ,000      |
|                           | 403073203 | ,000      |
|                           | 403073204 | ,000      |
|                           | 403073303 | ,000      |
|                           | 403073651 | ,000      |
|                           | 403073771 | ,000      |
|                           | 403133102 | ,000      |
|                           | 403133106 | ,000      |
|                           | 403133107 | ,000      |
|                           | 403133109 | ,000      |
|                           | 403133202 | 1,000     |
|                           | 403133203 | ,000      |
|                           | 403133204 | ,000      |
|                           | 403133315 | ,000      |
|                           | 403133322 | ,000      |
|                           | 403133401 | ,000      |
|                           | 403133402 | ,000      |
|                           | 403133550 | ,000      |
|                           | 403133772 | ,000      |
|                           | 403135803 | ,000      |

1  
2  
3  
4  
5  
6  
7  
8  
9  
10  
11  
12  
13  
14  
15  
16  
17  
18  
19  
20  
21  
22  
23  
24  
25  
26  
27  
28  
29  
30  
31  
32  
33  
34  
35  
36  
37  
38  
39  
40  
41  
42  
43  
44  
45  
46  
47  
48  
49  
50  
51  
52  
53  
54  
55  
56  
57  
58  
59  
60

**Categorical Variables Codings**

|                           |           | Parameter |
|---------------------------|-----------|-----------|
|                           |           | (14)      |
| VASTY2 (SAIR*10000)+VASTY | 403073101 | ,000      |
|                           | 403073102 | ,000      |
|                           | 403073103 | ,000      |
|                           | 403073202 | ,000      |
|                           | 403073203 | ,000      |
|                           | 403073204 | ,000      |
|                           | 403073303 | ,000      |
|                           | 403073651 | ,000      |
|                           | 403073771 | ,000      |
|                           | 403133102 | ,000      |
|                           | 403133106 | ,000      |
|                           | 403133107 | ,000      |
|                           | 403133109 | ,000      |
|                           | 403133202 | ,000      |
|                           | 403133203 | 1,000     |
|                           | 403133204 | ,000      |
|                           | 403133315 | ,000      |
|                           | 403133322 | ,000      |
|                           | 403133401 | ,000      |
|                           | 403133402 | ,000      |
|                           | 403133550 | ,000      |
|                           | 403133772 | ,000      |
|                           | 403135803 | ,000      |

For peer review only

## Categorical Variables Codings

|                           |           | Parameter |
|---------------------------|-----------|-----------|
|                           |           | (15)      |
| VASTY2 (SAIR*10000)+VASTY | 403073101 | ,000      |
|                           | 403073102 | ,000      |
|                           | 403073103 | ,000      |
|                           | 403073202 | ,000      |
|                           | 403073203 | ,000      |
|                           | 403073204 | ,000      |
|                           | 403073303 | ,000      |
|                           | 403073651 | ,000      |
|                           | 403073771 | ,000      |
|                           | 403133102 | ,000      |
|                           | 403133106 | ,000      |
|                           | 403133107 | ,000      |
|                           | 403133109 | ,000      |
|                           | 403133202 | ,000      |
|                           | 403133203 | ,000      |
|                           | 403133204 | 1,000     |
|                           | 403133315 | ,000      |
|                           | 403133322 | ,000      |
|                           | 403133401 | ,000      |
|                           | 403133402 | ,000      |
|                           | 403133550 | ,000      |
|                           | 403133772 | ,000      |
|                           | 403135803 | ,000      |

## Categorical Variables Codings

|                           |           | Parameter |
|---------------------------|-----------|-----------|
|                           |           | (16)      |
| VASTY2 (SAIR*10000)+VASTY | 403073101 | ,000      |
|                           | 403073102 | ,000      |
|                           | 403073103 | ,000      |
|                           | 403073202 | ,000      |
|                           | 403073203 | ,000      |
|                           | 403073204 | ,000      |
|                           | 403073303 | ,000      |
|                           | 403073651 | ,000      |
|                           | 403073771 | ,000      |
|                           | 403133102 | ,000      |
|                           | 403133106 | ,000      |
|                           | 403133107 | ,000      |
|                           | 403133109 | ,000      |
|                           | 403133202 | ,000      |
|                           | 403133203 | ,000      |
|                           | 403133204 | ,000      |
|                           | 403133315 | 1,000     |
|                           | 403133322 | ,000      |
|                           | 403133401 | ,000      |
|                           | 403133402 | ,000      |
|                           | 403133550 | ,000      |
|                           | 403133772 | ,000      |
|                           | 403135803 | ,000      |

## Categorical Variables Codings

|                           |           | Parameter |
|---------------------------|-----------|-----------|
|                           |           | (17)      |
| VASTY2 (SAIR*10000)+VASTY | 403073101 | ,000      |
|                           | 403073102 | ,000      |
|                           | 403073103 | ,000      |
|                           | 403073202 | ,000      |
|                           | 403073203 | ,000      |
|                           | 403073204 | ,000      |
|                           | 403073303 | ,000      |
|                           | 403073651 | ,000      |
|                           | 403073771 | ,000      |
|                           | 403133102 | ,000      |
|                           | 403133106 | ,000      |
|                           | 403133107 | ,000      |
|                           | 403133109 | ,000      |
|                           | 403133202 | ,000      |
|                           | 403133203 | ,000      |
|                           | 403133204 | ,000      |
|                           | 403133315 | ,000      |
|                           | 403133322 | 1,000     |
|                           | 403133401 | ,000      |
|                           | 403133402 | ,000      |
|                           | 403133550 | ,000      |
|                           | 403133772 | ,000      |
|                           | 403135803 | ,000      |



## Categorical Variables Codings

|                           |           | Parameter |
|---------------------------|-----------|-----------|
|                           |           | (18)      |
| VASTY2 (SAIR*10000)+VASTY | 403073101 | ,000      |
|                           | 403073102 | ,000      |
|                           | 403073103 | ,000      |
|                           | 403073202 | ,000      |
|                           | 403073203 | ,000      |
|                           | 403073204 | ,000      |
|                           | 403073303 | ,000      |
|                           | 403073651 | ,000      |
|                           | 403073771 | ,000      |
|                           | 403133102 | ,000      |
|                           | 403133106 | ,000      |
|                           | 403133107 | ,000      |
|                           | 403133109 | ,000      |
|                           | 403133202 | ,000      |
|                           | 403133203 | ,000      |
|                           | 403133204 | ,000      |
|                           | 403133315 | ,000      |
|                           | 403133322 | ,000      |
|                           | 403133401 | 1,000     |
|                           | 403133402 | ,000      |
|                           | 403133550 | ,000      |
|                           | 403133772 | ,000      |
|                           | 403135803 | ,000      |

## Categorical Variables Codings

|                           |           | Parameter |
|---------------------------|-----------|-----------|
|                           |           | (19)      |
| VASTY2 (SAIR*10000)+VASTY | 403073101 | ,000      |
|                           | 403073102 | ,000      |
|                           | 403073103 | ,000      |
|                           | 403073202 | ,000      |
|                           | 403073203 | ,000      |
|                           | 403073204 | ,000      |
|                           | 403073303 | ,000      |
|                           | 403073651 | ,000      |
|                           | 403073771 | ,000      |
|                           | 403133102 | ,000      |
|                           | 403133106 | ,000      |
|                           | 403133107 | ,000      |
|                           | 403133109 | ,000      |
|                           | 403133202 | ,000      |
|                           | 403133203 | ,000      |
|                           | 403133204 | ,000      |
|                           | 403133315 | ,000      |
|                           | 403133322 | ,000      |
|                           | 403133401 | ,000      |
|                           | 403133402 | 1,000     |
|                           | 403133550 | ,000      |
|                           | 403133772 | ,000      |
|                           | 403135803 | ,000      |

## Categorical Variables Codings

|                           |           | Parameter |
|---------------------------|-----------|-----------|
|                           |           | (20)      |
| VASTY2 (SAIR*10000)+VASTY | 403073101 | ,000      |
|                           | 403073102 | ,000      |
|                           | 403073103 | ,000      |
|                           | 403073202 | ,000      |
|                           | 403073203 | ,000      |
|                           | 403073204 | ,000      |
|                           | 403073303 | ,000      |
|                           | 403073651 | ,000      |
|                           | 403073771 | ,000      |
|                           | 403133102 | ,000      |
|                           | 403133106 | ,000      |
|                           | 403133107 | ,000      |
|                           | 403133109 | ,000      |
|                           | 403133202 | ,000      |
|                           | 403133203 | ,000      |
|                           | 403133204 | ,000      |
|                           | 403133315 | ,000      |
|                           | 403133322 | ,000      |
|                           | 403133401 | ,000      |
|                           | 403133402 | ,000      |
|                           | 403133550 | 1,000     |
|                           | 403133772 | ,000      |
|                           | 403135803 | ,000      |

## Categorical Variables Codings

|                           |           | Parameter |
|---------------------------|-----------|-----------|
|                           |           | (21)      |
| VASTY2 (SAIR*10000)+VASTY | 403073101 | ,000      |
|                           | 403073102 | ,000      |
|                           | 403073103 | ,000      |
|                           | 403073202 | ,000      |
|                           | 403073203 | ,000      |
|                           | 403073204 | ,000      |
|                           | 403073303 | ,000      |
|                           | 403073651 | ,000      |
|                           | 403073771 | ,000      |
|                           | 403133102 | ,000      |
|                           | 403133106 | ,000      |
|                           | 403133107 | ,000      |
|                           | 403133109 | ,000      |
|                           | 403133202 | ,000      |
|                           | 403133203 | ,000      |
|                           | 403133204 | ,000      |
|                           | 403133315 | ,000      |
|                           | 403133322 | ,000      |
|                           | 403133401 | ,000      |
|                           | 403133402 | ,000      |
|                           | 403133550 | ,000      |
|                           | 403133772 | 1,000     |
|                           | 403135803 | ,000      |

1  
2  
3  
4  
5  
6  
7  
8  
9  
10  
11  
12  
13  
14  
15  
16  
17  
18  
19  
20  
21  
22  
23  
24  
25  
26  
27  
28  
29  
30  
31  
32  
33  
34  
35  
36  
37  
38  
39  
40  
41  
42  
43  
44  
45  
46  
47  
48  
49  
50  
51  
52  
53  
54  
55  
56  
57  
58  
59  
60

**Categorical Variables Codings**

|                           |           | Parameter |
|---------------------------|-----------|-----------|
|                           |           | (22)      |
| VASTY2 (SAIR*10000)+VASTY | 403073101 | ,000      |
|                           | 403073102 | ,000      |
|                           | 403073103 | ,000      |
|                           | 403073202 | ,000      |
|                           | 403073203 | ,000      |
|                           | 403073204 | ,000      |
|                           | 403073303 | ,000      |
|                           | 403073651 | ,000      |
|                           | 403073771 | ,000      |
|                           | 403133102 | ,000      |
|                           | 403133106 | ,000      |
|                           | 403133107 | ,000      |
|                           | 403133109 | ,000      |
|                           | 403133202 | ,000      |
|                           | 403133203 | ,000      |
|                           | 403133204 | ,000      |
|                           | 403133315 | ,000      |
|                           | 403133322 | ,000      |
|                           | 403133401 | ,000      |
|                           | 403133402 | ,000      |
|                           | 403133550 | ,000      |
|                           | 403133772 | ,000      |
|                           | 403135803 | 1,000     |

For peer review only

## Categorical Variables Codings

|                           |           | Parameter |
|---------------------------|-----------|-----------|
|                           |           | (23)      |
| VASTY2 (SAIR*10000)+VASTY | 403073101 | ,000      |
|                           | 403073102 | ,000      |
|                           | 403073103 | ,000      |
|                           | 403073202 | ,000      |
|                           | 403073203 | ,000      |
|                           | 403073204 | ,000      |
|                           | 403073303 | ,000      |
|                           | 403073651 | ,000      |
|                           | 403073771 | ,000      |
|                           | 403133102 | ,000      |
|                           | 403133106 | ,000      |
|                           | 403133107 | ,000      |
|                           | 403133109 | ,000      |
|                           | 403133202 | ,000      |
|                           | 403133203 | ,000      |
|                           | 403133204 | ,000      |
|                           | 403133315 | ,000      |
|                           | 403133322 | ,000      |
|                           | 403133401 | ,000      |
|                           | 403133402 | ,000      |
|                           | 403133550 | ,000      |
|                           | 403133772 | ,000      |
|                           | 403135803 | ,000      |

1  
2  
3  
4  
5  
6  
7  
8  
9  
10  
11  
12  
13  
14  
15  
16  
17  
18  
19  
20  
21  
22  
23  
24  
25  
26  
27  
28  
29  
30  
31  
32  
33  
34  
35  
36  
37  
38  
39  
40  
41  
42  
43  
44  
45  
46  
47  
48  
49  
50  
51  
52  
53  
54  
55  
56  
57  
58  
59  
60

**Categorical Variables Codings**

|                           |           | Parameter |
|---------------------------|-----------|-----------|
|                           |           | (24)      |
| VASTY2 (SAIR*10000)+VASTY | 403073101 | ,000      |
|                           | 403073102 | ,000      |
|                           | 403073103 | ,000      |
|                           | 403073202 | ,000      |
|                           | 403073203 | ,000      |
|                           | 403073204 | ,000      |
|                           | 403073303 | ,000      |
|                           | 403073651 | ,000      |
|                           | 403073771 | ,000      |
|                           | 403133102 | ,000      |
|                           | 403133106 | ,000      |
|                           | 403133107 | ,000      |
|                           | 403133109 | ,000      |
|                           | 403133202 | ,000      |
|                           | 403133203 | ,000      |
|                           | 403133204 | ,000      |
|                           | 403133315 | ,000      |
|                           | 403133322 | ,000      |
|                           | 403133401 | ,000      |
|                           | 403133402 | ,000      |
|                           | 403133550 | ,000      |
|                           | 403133772 | ,000      |
|                           | 403135803 | ,000      |

For peer review only

## Categorical Variables Codings

|                           |           | Parameter |
|---------------------------|-----------|-----------|
|                           |           | (25)      |
| VASTY2 (SAIR*10000)+VASTY | 403073101 | ,000      |
|                           | 403073102 | ,000      |
|                           | 403073103 | ,000      |
|                           | 403073202 | ,000      |
|                           | 403073203 | ,000      |
|                           | 403073204 | ,000      |
|                           | 403073303 | ,000      |
|                           | 403073651 | ,000      |
|                           | 403073771 | ,000      |
|                           | 403133102 | ,000      |
|                           | 403133106 | ,000      |
|                           | 403133107 | ,000      |
|                           | 403133109 | ,000      |
|                           | 403133202 | ,000      |
|                           | 403133203 | ,000      |
|                           | 403133204 | ,000      |
|                           | 403133315 | ,000      |
|                           | 403133322 | ,000      |
|                           | 403133401 | ,000      |
|                           | 403133402 | ,000      |
|                           | 403133550 | ,000      |
|                           | 403133772 | ,000      |
|                           | 403135803 | ,000      |



1  
2  
3  
4  
5  
6  
7  
8  
9  
10  
11  
12  
13  
14  
15  
16  
17  
18  
19  
20  
21  
22  
23  
24  
25  
26  
27  
28  
29  
30  
31  
32  
33  
34  
35  
36  
37  
38  
39  
40  
41  
42  
43  
44  
45  
46  
47  
48  
49  
50  
51  
52  
53  
54  
55  
56  
57  
58  
59  
60

**Categorical Variables Codings**

|                           |           | Parameter |
|---------------------------|-----------|-----------|
|                           |           | (26)      |
| VASTY2 (SAIR*10000)+VASTY | 403073101 | ,000      |
|                           | 403073102 | ,000      |
|                           | 403073103 | ,000      |
|                           | 403073202 | ,000      |
|                           | 403073203 | ,000      |
|                           | 403073204 | ,000      |
|                           | 403073303 | ,000      |
|                           | 403073651 | ,000      |
|                           | 403073771 | ,000      |
|                           | 403133102 | ,000      |
|                           | 403133106 | ,000      |
|                           | 403133107 | ,000      |
|                           | 403133109 | ,000      |
|                           | 403133202 | ,000      |
|                           | 403133203 | ,000      |
|                           | 403133204 | ,000      |
|                           | 403133315 | ,000      |
|                           | 403133322 | ,000      |
|                           | 403133401 | ,000      |
|                           | 403133402 | ,000      |
|                           | 403133550 | ,000      |
|                           | 403133772 | ,000      |
|                           | 403135803 | ,000      |

Peer Review Only

## Categorical Variables Codings

|                           |           | Parameter |
|---------------------------|-----------|-----------|
|                           |           | (27)      |
| VASTY2 (SAIR*10000)+VASTY | 403073101 | ,000      |
|                           | 403073102 | ,000      |
|                           | 403073103 | ,000      |
|                           | 403073202 | ,000      |
|                           | 403073203 | ,000      |
|                           | 403073204 | ,000      |
|                           | 403073303 | ,000      |
|                           | 403073651 | ,000      |
|                           | 403073771 | ,000      |
|                           | 403133102 | ,000      |
|                           | 403133106 | ,000      |
|                           | 403133107 | ,000      |
|                           | 403133109 | ,000      |
|                           | 403133202 | ,000      |
|                           | 403133203 | ,000      |
|                           | 403133204 | ,000      |
|                           | 403133315 | ,000      |
|                           | 403133322 | ,000      |
|                           | 403133401 | ,000      |
|                           | 403133402 | ,000      |
|                           | 403133550 | ,000      |
|                           | 403133772 | ,000      |
|                           | 403135803 | ,000      |

1  
2  
3  
4  
5  
6  
7  
8  
9  
10  
11  
12  
13  
14  
15  
16  
17  
18  
19  
20  
21  
22  
23  
24  
25  
26  
27  
28  
29  
30  
31  
32  
33  
34  
35  
36  
37  
38  
39  
40  
41  
42  
43  
44  
45  
46  
47  
48  
49  
50  
51  
52  
53  
54  
55  
56  
57  
58  
59  
60

**Categorical Variables Codings**

|                           |           | Parameter |
|---------------------------|-----------|-----------|
|                           |           | (28)      |
| VASTY2 (SAIR*10000)+VASTY | 403073101 | ,000      |
|                           | 403073102 | ,000      |
|                           | 403073103 | ,000      |
|                           | 403073202 | ,000      |
|                           | 403073203 | ,000      |
|                           | 403073204 | ,000      |
|                           | 403073303 | ,000      |
|                           | 403073651 | ,000      |
|                           | 403073771 | ,000      |
|                           | 403133102 | ,000      |
|                           | 403133106 | ,000      |
|                           | 403133107 | ,000      |
|                           | 403133109 | ,000      |
|                           | 403133202 | ,000      |
|                           | 403133203 | ,000      |
|                           | 403133204 | ,000      |
|                           | 403133315 | ,000      |
|                           | 403133322 | ,000      |
|                           | 403133401 | ,000      |
|                           | 403133402 | ,000      |
|                           | 403133550 | ,000      |
|                           | 403133772 | ,000      |
|                           | 403135803 | ,000      |

Peer Review Only

## Categorical Variables Codings

|                           |           | Parameter |
|---------------------------|-----------|-----------|
|                           |           | (29)      |
| VASTY2 (SAIR*10000)+VASTY | 403073101 | ,000      |
|                           | 403073102 | ,000      |
|                           | 403073103 | ,000      |
|                           | 403073202 | ,000      |
|                           | 403073203 | ,000      |
|                           | 403073204 | ,000      |
|                           | 403073303 | ,000      |
|                           | 403073651 | ,000      |
|                           | 403073771 | ,000      |
|                           | 403133102 | ,000      |
|                           | 403133106 | ,000      |
|                           | 403133107 | ,000      |
|                           | 403133109 | ,000      |
|                           | 403133202 | ,000      |
|                           | 403133203 | ,000      |
|                           | 403133204 | ,000      |
|                           | 403133315 | ,000      |
|                           | 403133322 | ,000      |
|                           | 403133401 | ,000      |
|                           | 403133402 | ,000      |
|                           | 403133550 | ,000      |
|                           | 403133772 | ,000      |
|                           | 403135803 | ,000      |

1  
2  
3  
4  
5  
6  
7  
8  
9  
10  
11  
12  
13  
14  
15  
16  
17  
18  
19  
20  
21  
22  
23  
24  
25  
26  
27  
28  
29  
30  
31  
32  
33  
34  
35  
36  
37  
38  
39  
40  
41  
42  
43  
44  
45  
46  
47  
48  
49  
50  
51  
52  
53  
54  
55  
56  
57  
58  
59  
60

**Categorical Variables Codings**

|                           |           | Parameter |
|---------------------------|-----------|-----------|
|                           |           | (30)      |
| VASTY2 (SAIR*10000)+VASTY | 403073101 | ,000      |
|                           | 403073102 | ,000      |
|                           | 403073103 | ,000      |
|                           | 403073202 | ,000      |
|                           | 403073203 | ,000      |
|                           | 403073204 | ,000      |
|                           | 403073303 | ,000      |
|                           | 403073651 | ,000      |
|                           | 403073771 | ,000      |
|                           | 403133102 | ,000      |
|                           | 403133106 | ,000      |
|                           | 403133107 | ,000      |
|                           | 403133109 | ,000      |
|                           | 403133202 | ,000      |
|                           | 403133203 | ,000      |
|                           | 403133204 | ,000      |
|                           | 403133315 | ,000      |
|                           | 403133322 | ,000      |
|                           | 403133401 | ,000      |
|                           | 403133402 | ,000      |
|                           | 403133550 | ,000      |
|                           | 403133772 | ,000      |
|                           | 403135803 | ,000      |

Peer Review Only

## Categorical Variables Codings

|                           |           | Parameter |
|---------------------------|-----------|-----------|
|                           |           | (31)      |
| VASTY2 (SAIR*10000)+VASTY | 403073101 | ,000      |
|                           | 403073102 | ,000      |
|                           | 403073103 | ,000      |
|                           | 403073202 | ,000      |
|                           | 403073203 | ,000      |
|                           | 403073204 | ,000      |
|                           | 403073303 | ,000      |
|                           | 403073651 | ,000      |
|                           | 403073771 | ,000      |
|                           | 403133102 | ,000      |
|                           | 403133106 | ,000      |
|                           | 403133107 | ,000      |
|                           | 403133109 | ,000      |
|                           | 403133202 | ,000      |
|                           | 403133203 | ,000      |
|                           | 403133204 | ,000      |
|                           | 403133315 | ,000      |
|                           | 403133322 | ,000      |
|                           | 403133401 | ,000      |
|                           | 403133402 | ,000      |
|                           | 403133550 | ,000      |
|                           | 403133772 | ,000      |
|                           | 403135803 | ,000      |

1  
2  
3  
4  
5  
6  
7  
8  
9  
10  
11  
12  
13  
14  
15  
16  
17  
18  
19  
20  
21  
22  
23  
24  
25  
26  
27  
28  
29  
30  
31  
32  
33  
34  
35  
36  
37  
38  
39  
40  
41  
42  
43  
44  
45  
46  
47  
48  
49  
50  
51  
52  
53  
54  
55  
56  
57  
58  
59  
60

**Categorical Variables Codings**

|                           |           | Parameter |
|---------------------------|-----------|-----------|
|                           |           | (32)      |
| VASTY2 (SAIR*10000)+VASTY | 403073101 | ,000      |
|                           | 403073102 | ,000      |
|                           | 403073103 | ,000      |
|                           | 403073202 | ,000      |
|                           | 403073203 | ,000      |
|                           | 403073204 | ,000      |
|                           | 403073303 | ,000      |
|                           | 403073651 | ,000      |
|                           | 403073771 | ,000      |
|                           | 403133102 | ,000      |
|                           | 403133106 | ,000      |
|                           | 403133107 | ,000      |
|                           | 403133109 | ,000      |
|                           | 403133202 | ,000      |
|                           | 403133203 | ,000      |
|                           | 403133204 | ,000      |
|                           | 403133315 | ,000      |
|                           | 403133322 | ,000      |
|                           | 403133401 | ,000      |
|                           | 403133402 | ,000      |
|                           | 403133550 | ,000      |
|                           | 403133772 | ,000      |
|                           | 403135803 | ,000      |

Peer Review Only

## Categorical Variables Codings

|                           |           | Parameter |
|---------------------------|-----------|-----------|
|                           |           | (33)      |
| VASTY2 (SAIR*10000)+VASTY | 403073101 | ,000      |
|                           | 403073102 | ,000      |
|                           | 403073103 | ,000      |
|                           | 403073202 | ,000      |
|                           | 403073203 | ,000      |
|                           | 403073204 | ,000      |
|                           | 403073303 | ,000      |
|                           | 403073651 | ,000      |
|                           | 403073771 | ,000      |
|                           | 403133102 | ,000      |
|                           | 403133106 | ,000      |
|                           | 403133107 | ,000      |
|                           | 403133109 | ,000      |
|                           | 403133202 | ,000      |
|                           | 403133203 | ,000      |
|                           | 403133204 | ,000      |
|                           | 403133315 | ,000      |
|                           | 403133322 | ,000      |
|                           | 403133401 | ,000      |
|                           | 403133402 | ,000      |
|                           | 403133550 | ,000      |
|                           | 403133772 | ,000      |
|                           | 403135803 | ,000      |



## Categorical Variables Codings

|                           |           | Parameter |
|---------------------------|-----------|-----------|
|                           |           | (34)      |
| VASTY2 (SAIR*10000)+VASTY | 403073101 | ,000      |
|                           | 403073102 | ,000      |
|                           | 403073103 | ,000      |
|                           | 403073202 | ,000      |
|                           | 403073203 | ,000      |
|                           | 403073204 | ,000      |
|                           | 403073303 | ,000      |
|                           | 403073651 | ,000      |
|                           | 403073771 | ,000      |
|                           | 403133102 | ,000      |
|                           | 403133106 | ,000      |
|                           | 403133107 | ,000      |
|                           | 403133109 | ,000      |
|                           | 403133202 | ,000      |
|                           | 403133203 | ,000      |
|                           | 403133204 | ,000      |
|                           | 403133315 | ,000      |
|                           | 403133322 | ,000      |
|                           | 403133401 | ,000      |
|                           | 403133402 | ,000      |
|                           | 403133550 | ,000      |
|                           | 403133772 | ,000      |
|                           | 403135803 | ,000      |

## Categorical Variables Codings

|                           |           | Paramete... |
|---------------------------|-----------|-------------|
|                           |           | (35)        |
| VASTY2 (SAIR*10000)+VASTY | 403073101 | ,000        |
|                           | 403073102 | ,000        |
|                           | 403073103 | ,000        |
|                           | 403073202 | ,000        |
|                           | 403073203 | ,000        |
|                           | 403073204 | ,000        |
|                           | 403073303 | ,000        |
|                           | 403073651 | ,000        |
|                           | 403073771 | ,000        |
|                           | 403133102 | ,000        |
|                           | 403133106 | ,000        |
|                           | 403133107 | ,000        |
|                           | 403133109 | ,000        |
|                           | 403133202 | ,000        |
|                           | 403133203 | ,000        |
|                           | 403133204 | ,000        |
|                           | 403133315 | ,000        |
|                           | 403133322 | ,000        |
|                           | 403133401 | ,000        |
|                           | 403133402 | ,000        |
|                           | 403133550 | ,000        |
|                           | 403133772 | ,000        |
|                           | 403135803 | ,000        |

## Categorical Variables Codings

|                                              |                                         | Frequency |
|----------------------------------------------|-----------------------------------------|-----------|
|                                              | 404060001                               | 365       |
|                                              | 404060002                               | 366       |
|                                              | 404310003                               | 291       |
|                                              | 404310004                               | 291       |
|                                              | 502300005                               | 366       |
|                                              | 502300006                               | 225       |
|                                              | 502300007                               | 366       |
|                                              | 502300214                               | 366       |
|                                              | 502300411                               | 366       |
|                                              | 502300415                               | 360       |
|                                              | 502300416                               | 363       |
|                                              | 502300811                               | 364       |
|                                              | 502300913                               | 315       |
| weekday veckodag                             | 1 måndag                                | 1805      |
|                                              | 2 tisdag                                | 1812      |
|                                              | 3 onsdag                                | 1800      |
|                                              | 4 torsdag                               | 1794      |
|                                              | 5 fredag                                | 1788      |
|                                              | 6 lördag                                | 1735      |
|                                              | 7 söndag                                | 1741      |
| season säsong/period                         | 1 januari-mars                          | 3182      |
|                                              | 2 april-maj                             | 2127      |
|                                              | 3 juni-augusti                          | 2911      |
|                                              | 4 september-oktober                     | 2144      |
|                                              | 5 november-december                     | 2111      |
| bv3 belasnting vs paoncil dubbla intervallet | 1 medelbelastning                       | 9121      |
|                                              | 2 underbelastning                       | 1505      |
|                                              | 3 överbelastning                        | 1849      |
| holiday större helg                          | 1 ingen större helg                     | 12078     |
|                                              | 2 större helg (påsk/midsommar/julonyår) | 397       |

## Categorical Variables Codings

|                                              |                                         | Parameter |
|----------------------------------------------|-----------------------------------------|-----------|
|                                              |                                         | (1)       |
|                                              | 404060001                               | ,000      |
|                                              | 404060002                               | ,000      |
|                                              | 404310003                               | ,000      |
|                                              | 404310004                               | ,000      |
|                                              | 502300005                               | ,000      |
|                                              | 502300006                               | ,000      |
|                                              | 502300007                               | ,000      |
|                                              | 502300214                               | ,000      |
|                                              | 502300411                               | ,000      |
|                                              | 502300415                               | ,000      |
|                                              | 502300416                               | ,000      |
|                                              | 502300811                               | ,000      |
|                                              | 502300913                               | ,000      |
| weekday veckodag                             | 1 måndag                                | ,000      |
|                                              | 2 tisdag                                | 1,000     |
|                                              | 3 onsdag                                | ,000      |
|                                              | 4 torsdag                               | ,000      |
|                                              | 5 fredag                                | ,000      |
|                                              | 6 lördag                                | ,000      |
|                                              | 7 söndag                                | ,000      |
| season säsong/period                         | 1 januari-mars                          | ,000      |
|                                              | 2 april-maj                             | 1,000     |
|                                              | 3 juni-augusti                          | ,000      |
|                                              | 4 september-oktober                     | ,000      |
|                                              | 5 november-december                     | ,000      |
| bv3 belasnting vs paoncil dubbla intervallet | 1 medelbelastning                       | ,000      |
|                                              | 2 underbelastning                       | 1,000     |
|                                              | 3 överbelastning                        | ,000      |
| holiday större helg                          | 1 ingen större helg                     | ,000      |
|                                              | 2 större helg (påsk/midsommar/julonyår) | 1,000     |

## Categorical Variables Codings

|                                              |                                         | Parameter |
|----------------------------------------------|-----------------------------------------|-----------|
|                                              |                                         | (2)       |
|                                              | 404060001                               | ,000      |
|                                              | 404060002                               | ,000      |
|                                              | 404310003                               | ,000      |
|                                              | 404310004                               | ,000      |
|                                              | 502300005                               | ,000      |
|                                              | 502300006                               | ,000      |
|                                              | 502300007                               | ,000      |
|                                              | 502300214                               | ,000      |
|                                              | 502300411                               | ,000      |
|                                              | 502300415                               | ,000      |
|                                              | 502300416                               | ,000      |
|                                              | 502300811                               | ,000      |
|                                              | 502300913                               | ,000      |
| weekday veckodag                             | 1 måndag                                | ,000      |
|                                              | 2 tisdag                                | ,000      |
|                                              | 3 onsdag                                | 1,000     |
|                                              | 4 torsdag                               | ,000      |
|                                              | 5 fredag                                | ,000      |
|                                              | 6 lördag                                | ,000      |
|                                              | 7 söndag                                | ,000      |
| season säsong/period                         | 1 januari-mars                          | ,000      |
|                                              | 2 april-maj                             | ,000      |
|                                              | 3 juni-augusti                          | 1,000     |
|                                              | 4 september-oktober                     | ,000      |
|                                              | 5 november-december                     | ,000      |
| bv3 belasnting vs paoncil dubbla intervallet | 1 medelbelastning                       | ,000      |
|                                              | 2 underbelastning                       | ,000      |
|                                              | 3 överbelastning                        | 1,000     |
| holiday större helg                          | 1 ingen större helg                     |           |
|                                              | 2 större helg (påsk/midsommar/julonyår) |           |

## Categorical Variables Codings

|                                              |                                         | Parameter |
|----------------------------------------------|-----------------------------------------|-----------|
|                                              |                                         | (3)       |
|                                              | 404060001                               | ,000      |
|                                              | 404060002                               | ,000      |
|                                              | 404310003                               | ,000      |
|                                              | 404310004                               | ,000      |
|                                              | 502300005                               | ,000      |
|                                              | 502300006                               | ,000      |
|                                              | 502300007                               | ,000      |
|                                              | 502300214                               | ,000      |
|                                              | 502300411                               | ,000      |
|                                              | 502300415                               | ,000      |
|                                              | 502300416                               | ,000      |
|                                              | 502300811                               | ,000      |
|                                              | 502300913                               | ,000      |
| weekday veckodag                             | 1 måndag                                | ,000      |
|                                              | 2 tisdag                                | ,000      |
|                                              | 3 onsdag                                | ,000      |
|                                              | 4 torsdag                               | 1,000     |
|                                              | 5 fredag                                | ,000      |
|                                              | 6 lördag                                | ,000      |
|                                              | 7 söndag                                | ,000      |
| season säsong/period                         | 1 januari-mars                          | ,000      |
|                                              | 2 april-maj                             | ,000      |
|                                              | 3 juni-augusti                          | ,000      |
|                                              | 4 september-oktober                     | 1,000     |
|                                              | 5 november-december                     | ,000      |
| bv3 belasnting vs paoncil dubbla intervallet | 1 medelbelastning                       |           |
|                                              | 2 underbelastning                       |           |
|                                              | 3 överbelastning                        |           |
| holiday större helg                          | 1 ingen större helg                     |           |
|                                              | 2 större helg (påsk/midsommar/julonyår) |           |

## Categorical Variables Codings

|                                              |                                         | Parameter |
|----------------------------------------------|-----------------------------------------|-----------|
|                                              |                                         | (4)       |
|                                              | 404060001                               | ,000      |
|                                              | 404060002                               | ,000      |
|                                              | 404310003                               | ,000      |
|                                              | 404310004                               | ,000      |
|                                              | 502300005                               | ,000      |
|                                              | 502300006                               | ,000      |
|                                              | 502300007                               | ,000      |
|                                              | 502300214                               | ,000      |
|                                              | 502300411                               | ,000      |
|                                              | 502300415                               | ,000      |
|                                              | 502300416                               | ,000      |
|                                              | 502300811                               | ,000      |
|                                              | 502300913                               | ,000      |
| weekday veckodag                             | 1 måndag                                | ,000      |
|                                              | 2 tisdag                                | ,000      |
|                                              | 3 onsdag                                | ,000      |
|                                              | 4 torsdag                               | ,000      |
|                                              | 5 fredag                                | 1,000     |
|                                              | 6 lördag                                | ,000      |
|                                              | 7 söndag                                | ,000      |
| season säsong/period                         | 1 januari-mars                          | ,000      |
|                                              | 2 april-maj                             | ,000      |
|                                              | 3 juni-augusti                          | ,000      |
|                                              | 4 september-oktober                     | ,000      |
|                                              | 5 november-december                     | 1,000     |
| bv3 belasnting vs paoncil dubbla intervallet | 1 medelbelastning                       |           |
|                                              | 2 underbelastning                       |           |
|                                              | 3 överbelastning                        |           |
| holiday större helg                          | 1 ingen större helg                     |           |
|                                              | 2 större helg (påsk/midsommar/julonyår) |           |

## Categorical Variables Codings

|                                              |                                         | Parameter |
|----------------------------------------------|-----------------------------------------|-----------|
|                                              |                                         | (5)       |
|                                              | 404060001                               | ,000      |
|                                              | 404060002                               | ,000      |
|                                              | 404310003                               | ,000      |
|                                              | 404310004                               | ,000      |
|                                              | 502300005                               | ,000      |
|                                              | 502300006                               | ,000      |
|                                              | 502300007                               | ,000      |
|                                              | 502300214                               | ,000      |
|                                              | 502300411                               | ,000      |
|                                              | 502300415                               | ,000      |
|                                              | 502300416                               | ,000      |
|                                              | 502300811                               | ,000      |
|                                              | 502300913                               | ,000      |
| weekday veckodag                             | 1 måndag                                | ,000      |
|                                              | 2 tisdag                                | ,000      |
|                                              | 3 onsdag                                | ,000      |
|                                              | 4 torsdag                               | ,000      |
|                                              | 5 fredag                                | ,000      |
|                                              | 6 lördag                                | 1,000     |
|                                              | 7 söndag                                | ,000      |
| season säsong/period                         | 1 januari-mars                          |           |
|                                              | 2 april-maj                             |           |
|                                              | 3 juni-augusti                          |           |
|                                              | 4 september-oktober                     |           |
|                                              | 5 november-december                     |           |
| bv3 belastning vs paoncil dubbla intervallet | 1 medelbelastning                       |           |
|                                              | 2 underbelastning                       |           |
|                                              | 3 överbelastning                        |           |
| holiday större helg                          | 1 ingen större helg                     |           |
|                                              | 2 större helg (påsk/midsommar/julonyår) |           |



## Categorical Variables Codings

|                                              |                                         | Parameter |
|----------------------------------------------|-----------------------------------------|-----------|
|                                              |                                         | (6)       |
|                                              | 404060001                               | ,000      |
|                                              | 404060002                               | ,000      |
|                                              | 404310003                               | ,000      |
|                                              | 404310004                               | ,000      |
|                                              | 502300005                               | ,000      |
|                                              | 502300006                               | ,000      |
|                                              | 502300007                               | ,000      |
|                                              | 502300214                               | ,000      |
|                                              | 502300411                               | ,000      |
|                                              | 502300415                               | ,000      |
|                                              | 502300416                               | ,000      |
|                                              | 502300811                               | ,000      |
|                                              | 502300913                               | ,000      |
| weekday veckodag                             | 1 måndag                                | ,000      |
|                                              | 2 tisdag                                | ,000      |
|                                              | 3 onsdag                                | ,000      |
|                                              | 4 torsdag                               | ,000      |
|                                              | 5 fredag                                | ,000      |
|                                              | 6 lördag                                | ,000      |
|                                              | 7 söndag                                | 1,000     |
| season säsong/period                         | 1 januari-mars                          |           |
|                                              | 2 april-maj                             |           |
|                                              | 3 juni-augusti                          |           |
|                                              | 4 september-oktober                     |           |
|                                              | 5 november-december                     |           |
| bv3 belastning vs paoncil dubbla intervallet | 1 medelbelastning                       |           |
|                                              | 2 underbelastning                       |           |
|                                              | 3 överbelastning                        |           |
| holiday större helg                          | 1 ingen större helg                     |           |
|                                              | 2 större helg (påsk/midsommar/julonyår) |           |

## Categorical Variables Codings

|                                              |                                         | Parameter |
|----------------------------------------------|-----------------------------------------|-----------|
|                                              |                                         | (7)       |
|                                              | 404060001                               | ,000      |
|                                              | 404060002                               | ,000      |
|                                              | 404310003                               | ,000      |
|                                              | 404310004                               | ,000      |
|                                              | 502300005                               | ,000      |
|                                              | 502300006                               | ,000      |
|                                              | 502300007                               | ,000      |
|                                              | 502300214                               | ,000      |
|                                              | 502300411                               | ,000      |
|                                              | 502300415                               | ,000      |
|                                              | 502300416                               | ,000      |
|                                              | 502300811                               | ,000      |
|                                              | 502300913                               | ,000      |
| weekday veckodag                             | 1 måndag                                |           |
|                                              | 2 tisdag                                |           |
|                                              | 3 onsdag                                |           |
|                                              | 4 torsdag                               |           |
|                                              | 5 fredag                                |           |
|                                              | 6 lördag                                |           |
|                                              | 7 söndag                                |           |
| season säsong/period                         | 1 januari-mars                          |           |
|                                              | 2 april-maj                             |           |
|                                              | 3 juni-augusti                          |           |
|                                              | 4 september-oktober                     |           |
|                                              | 5 november-december                     |           |
| bv3 belasnting vs paoncil dubbla intervallet | 1 medelbelastning                       |           |
|                                              | 2 underbelastning                       |           |
|                                              | 3 överbelastning                        |           |
| holiday större helg                          | 1 ingen större helg                     |           |
|                                              | 2 större helg (påsk/midsommar/julonyår) |           |

## Categorical Variables Codings

|                                              |                                         | Parameter |
|----------------------------------------------|-----------------------------------------|-----------|
|                                              |                                         | (8)       |
|                                              | 404060001                               | ,000      |
|                                              | 404060002                               | ,000      |
|                                              | 404310003                               | ,000      |
|                                              | 404310004                               | ,000      |
|                                              | 502300005                               | ,000      |
|                                              | 502300006                               | ,000      |
|                                              | 502300007                               | ,000      |
|                                              | 502300214                               | ,000      |
|                                              | 502300411                               | ,000      |
|                                              | 502300415                               | ,000      |
|                                              | 502300416                               | ,000      |
|                                              | 502300811                               | ,000      |
|                                              | 502300913                               | ,000      |
| weekday veckodag                             | 1 måndag                                |           |
|                                              | 2 tisdag                                |           |
|                                              | 3 onsdag                                |           |
|                                              | 4 torsdag                               |           |
|                                              | 5 fredag                                |           |
|                                              | 6 lördag                                |           |
|                                              | 7 söndag                                |           |
| season säsong/period                         | 1 januari-mars                          |           |
|                                              | 2 april-maj                             |           |
|                                              | 3 juni-augusti                          |           |
|                                              | 4 september-oktober                     |           |
|                                              | 5 november-december                     |           |
| bv3 belasnting vs paoncil dubbla intervallet | 1 medelbelastning                       |           |
|                                              | 2 underbelastning                       |           |
|                                              | 3 överbelastning                        |           |
| holiday större helg                          | 1 ingen större helg                     |           |
|                                              | 2 större helg (påsk/midsommar/julonyår) |           |

## Categorical Variables Codings

|                                              |                                         | Parameter |
|----------------------------------------------|-----------------------------------------|-----------|
|                                              |                                         | (9)       |
|                                              | 404060001                               | ,000      |
|                                              | 404060002                               | ,000      |
|                                              | 404310003                               | ,000      |
|                                              | 404310004                               | ,000      |
|                                              | 502300005                               | ,000      |
|                                              | 502300006                               | ,000      |
|                                              | 502300007                               | ,000      |
|                                              | 502300214                               | ,000      |
|                                              | 502300411                               | ,000      |
|                                              | 502300415                               | ,000      |
|                                              | 502300416                               | ,000      |
|                                              | 502300811                               | ,000      |
|                                              | 502300913                               | ,000      |
| weekday veckodag                             | 1 måndag                                |           |
|                                              | 2 tisdag                                |           |
|                                              | 3 onsdag                                |           |
|                                              | 4 torsdag                               |           |
|                                              | 5 fredag                                |           |
|                                              | 6 lördag                                |           |
|                                              | 7 söndag                                |           |
| season säsong/period                         | 1 januari-mars                          |           |
|                                              | 2 april-maj                             |           |
|                                              | 3 juni-augusti                          |           |
|                                              | 4 september-oktober                     |           |
|                                              | 5 november-december                     |           |
| bv3 belasnting vs paoncil dubbla intervallet | 1 medelbelastning                       |           |
|                                              | 2 underbelastning                       |           |
|                                              | 3 överbelastning                        |           |
| holiday större helg                          | 1 ingen större helg                     |           |
|                                              | 2 större helg (påsk/midsommar/julonyår) |           |

## Categorical Variables Codings

|                                              |                                         | Parameter |
|----------------------------------------------|-----------------------------------------|-----------|
|                                              |                                         | (10)      |
|                                              | 404060001                               | ,000      |
|                                              | 404060002                               | ,000      |
|                                              | 404310003                               | ,000      |
|                                              | 404310004                               | ,000      |
|                                              | 502300005                               | ,000      |
|                                              | 502300006                               | ,000      |
|                                              | 502300007                               | ,000      |
|                                              | 502300214                               | ,000      |
|                                              | 502300411                               | ,000      |
|                                              | 502300415                               | ,000      |
|                                              | 502300416                               | ,000      |
|                                              | 502300811                               | ,000      |
|                                              | 502300913                               | ,000      |
| weekday veckodag                             | 1 måndag                                |           |
|                                              | 2 tisdag                                |           |
|                                              | 3 onsdag                                |           |
|                                              | 4 torsdag                               |           |
|                                              | 5 fredag                                |           |
|                                              | 6 lördag                                |           |
|                                              | 7 söndag                                |           |
| season säsong/period                         | 1 januari-mars                          |           |
|                                              | 2 april-maj                             |           |
|                                              | 3 juni-augusti                          |           |
|                                              | 4 september-oktober                     |           |
|                                              | 5 november-december                     |           |
| bv3 belasnting vs paoncil dubbla intervallet | 1 medelbelastning                       |           |
|                                              | 2 underbelastning                       |           |
|                                              | 3 överbelastning                        |           |
| holiday större helg                          | 1 ingen större helg                     |           |
|                                              | 2 större helg (påsk/midsommar/julonyår) |           |

## Categorical Variables Codings

|                                              |                                         | Parameter |
|----------------------------------------------|-----------------------------------------|-----------|
|                                              |                                         | (11)      |
|                                              | 404060001                               | ,000      |
|                                              | 404060002                               | ,000      |
|                                              | 404310003                               | ,000      |
|                                              | 404310004                               | ,000      |
|                                              | 502300005                               | ,000      |
|                                              | 502300006                               | ,000      |
|                                              | 502300007                               | ,000      |
|                                              | 502300214                               | ,000      |
|                                              | 502300411                               | ,000      |
|                                              | 502300415                               | ,000      |
|                                              | 502300416                               | ,000      |
|                                              | 502300811                               | ,000      |
|                                              | 502300913                               | ,000      |
| weekday veckodag                             | 1 måndag                                |           |
|                                              | 2 tisdag                                |           |
|                                              | 3 onsdag                                |           |
|                                              | 4 torsdag                               |           |
|                                              | 5 fredag                                |           |
|                                              | 6 lördag                                |           |
|                                              | 7 söndag                                |           |
| season säsong/period                         | 1 januari-mars                          |           |
|                                              | 2 april-maj                             |           |
|                                              | 3 juni-augusti                          |           |
|                                              | 4 september-oktober                     |           |
|                                              | 5 november-december                     |           |
| bv3 belasnting vs paoncil dubbla intervallet | 1 medelbelastning                       |           |
|                                              | 2 underbelastning                       |           |
|                                              | 3 överbelastning                        |           |
| holiday större helg                          | 1 ingen större helg                     |           |
|                                              | 2 större helg (påsk/midsommar/julonyår) |           |

## Categorical Variables Codings

|                                              |                                         | Parameter |
|----------------------------------------------|-----------------------------------------|-----------|
|                                              |                                         | (12)      |
|                                              | 404060001                               | ,000      |
|                                              | 404060002                               | ,000      |
|                                              | 404310003                               | ,000      |
|                                              | 404310004                               | ,000      |
|                                              | 502300005                               | ,000      |
|                                              | 502300006                               | ,000      |
|                                              | 502300007                               | ,000      |
|                                              | 502300214                               | ,000      |
|                                              | 502300411                               | ,000      |
|                                              | 502300415                               | ,000      |
|                                              | 502300416                               | ,000      |
|                                              | 502300811                               | ,000      |
|                                              | 502300913                               | ,000      |
| weekday veckodag                             | 1 måndag                                |           |
|                                              | 2 tisdag                                |           |
|                                              | 3 onsdag                                |           |
|                                              | 4 torsdag                               |           |
|                                              | 5 fredag                                |           |
|                                              | 6 lördag                                |           |
|                                              | 7 söndag                                |           |
| season säsong/period                         | 1 januari-mars                          |           |
|                                              | 2 april-maj                             |           |
|                                              | 3 juni-augusti                          |           |
|                                              | 4 september-oktober                     |           |
|                                              | 5 november-december                     |           |
| bv3 belasnting vs paoncil dubbla intervallet | 1 medelbelastning                       |           |
|                                              | 2 underbelastning                       |           |
|                                              | 3 överbelastning                        |           |
| holiday större helg                          | 1 ingen större helg                     |           |
|                                              | 2 större helg (påsk/midsommar/julonyår) |           |

## Categorical Variables Codings

|                                              |                                         | Parameter |
|----------------------------------------------|-----------------------------------------|-----------|
|                                              |                                         | (13)      |
|                                              | 404060001                               | ,000      |
|                                              | 404060002                               | ,000      |
|                                              | 404310003                               | ,000      |
|                                              | 404310004                               | ,000      |
|                                              | 502300005                               | ,000      |
|                                              | 502300006                               | ,000      |
|                                              | 502300007                               | ,000      |
|                                              | 502300214                               | ,000      |
|                                              | 502300411                               | ,000      |
|                                              | 502300415                               | ,000      |
|                                              | 502300416                               | ,000      |
|                                              | 502300811                               | ,000      |
|                                              | 502300913                               | ,000      |
| weekday veckodag                             | 1 måndag                                |           |
|                                              | 2 tisdag                                |           |
|                                              | 3 onsdag                                |           |
|                                              | 4 torsdag                               |           |
|                                              | 5 fredag                                |           |
|                                              | 6 lördag                                |           |
|                                              | 7 söndag                                |           |
| season säsong/period                         | 1 januari-mars                          |           |
|                                              | 2 april-maj                             |           |
|                                              | 3 juni-augusti                          |           |
|                                              | 4 september-oktober                     |           |
|                                              | 5 november-december                     |           |
| bv3 belastning vs paoncil dubbla intervallet | 1 medelbelastning                       |           |
|                                              | 2 underbelastning                       |           |
|                                              | 3 överbelastning                        |           |
| holiday större helg                          | 1 ingen större helg                     |           |
|                                              | 2 större helg (påsk/midsommar/julonyår) |           |



## Categorical Variables Codings

|                                              |                                         | Parameter |
|----------------------------------------------|-----------------------------------------|-----------|
|                                              |                                         | (14)      |
|                                              | 404060001                               | ,000      |
|                                              | 404060002                               | ,000      |
|                                              | 404310003                               | ,000      |
|                                              | 404310004                               | ,000      |
|                                              | 502300005                               | ,000      |
|                                              | 502300006                               | ,000      |
|                                              | 502300007                               | ,000      |
|                                              | 502300214                               | ,000      |
|                                              | 502300411                               | ,000      |
|                                              | 502300415                               | ,000      |
|                                              | 502300416                               | ,000      |
|                                              | 502300811                               | ,000      |
|                                              | 502300913                               | ,000      |
| weekday veckodag                             | 1 måndag                                |           |
|                                              | 2 tisdag                                |           |
|                                              | 3 onsdag                                |           |
|                                              | 4 torsdag                               |           |
|                                              | 5 fredag                                |           |
|                                              | 6 lördag                                |           |
|                                              | 7 söndag                                |           |
| season säsong/period                         | 1 januari-mars                          |           |
|                                              | 2 april-maj                             |           |
|                                              | 3 juni-augusti                          |           |
|                                              | 4 september-oktober                     |           |
|                                              | 5 november-december                     |           |
| bv3 belastning vs paoncil dubbla intervallet | 1 medelbelastning                       |           |
|                                              | 2 underbelastning                       |           |
|                                              | 3 överbelastning                        |           |
| holiday större helg                          | 1 ingen större helg                     |           |
|                                              | 2 större helg (påsk/midsommar/julonyår) |           |

## Categorical Variables Codings

|                                              |                                         | Parameter |
|----------------------------------------------|-----------------------------------------|-----------|
|                                              |                                         | (15)      |
|                                              | 404060001                               | ,000      |
|                                              | 404060002                               | ,000      |
|                                              | 404310003                               | ,000      |
|                                              | 404310004                               | ,000      |
|                                              | 502300005                               | ,000      |
|                                              | 502300006                               | ,000      |
|                                              | 502300007                               | ,000      |
|                                              | 502300214                               | ,000      |
|                                              | 502300411                               | ,000      |
|                                              | 502300415                               | ,000      |
|                                              | 502300416                               | ,000      |
|                                              | 502300811                               | ,000      |
|                                              | 502300913                               | ,000      |
| weekday veckodag                             | 1 måndag                                |           |
|                                              | 2 tisdag                                |           |
|                                              | 3 onsdag                                |           |
|                                              | 4 torsdag                               |           |
|                                              | 5 fredag                                |           |
|                                              | 6 lördag                                |           |
|                                              | 7 söndag                                |           |
| season säsong/period                         | 1 januari-mars                          |           |
|                                              | 2 april-maj                             |           |
|                                              | 3 juni-augusti                          |           |
|                                              | 4 september-oktober                     |           |
|                                              | 5 november-december                     |           |
| bv3 belastning vs paoncil dubbla intervallet | 1 medelbelastning                       |           |
|                                              | 2 underbelastning                       |           |
|                                              | 3 överbelastning                        |           |
| holiday större helg                          | 1 ingen större helg                     |           |
|                                              | 2 större helg (påsk/midsommar/julonyår) |           |

## Categorical Variables Codings

|                                              |                                         | Parameter |
|----------------------------------------------|-----------------------------------------|-----------|
|                                              |                                         | (16)      |
|                                              | 404060001                               | ,000      |
|                                              | 404060002                               | ,000      |
|                                              | 404310003                               | ,000      |
|                                              | 404310004                               | ,000      |
|                                              | 502300005                               | ,000      |
|                                              | 502300006                               | ,000      |
|                                              | 502300007                               | ,000      |
|                                              | 502300214                               | ,000      |
|                                              | 502300411                               | ,000      |
|                                              | 502300415                               | ,000      |
|                                              | 502300416                               | ,000      |
|                                              | 502300811                               | ,000      |
|                                              | 502300913                               | ,000      |
| weekday veckodag                             | 1 måndag                                |           |
|                                              | 2 tisdag                                |           |
|                                              | 3 onsdag                                |           |
|                                              | 4 torsdag                               |           |
|                                              | 5 fredag                                |           |
|                                              | 6 lördag                                |           |
|                                              | 7 söndag                                |           |
| season säsong/period                         | 1 januari-mars                          |           |
|                                              | 2 april-maj                             |           |
|                                              | 3 juni-augusti                          |           |
|                                              | 4 september-oktober                     |           |
|                                              | 5 november-december                     |           |
| bv3 belastning vs paoncil dubbla intervallet | 1 medelbelastning                       |           |
|                                              | 2 underbelastning                       |           |
|                                              | 3 överbelastning                        |           |
| holiday större helg                          | 1 ingen större helg                     |           |
|                                              | 2 större helg (påsk/midsommar/julonyår) |           |

## Categorical Variables Codings

|                                              |                                         | Parameter |
|----------------------------------------------|-----------------------------------------|-----------|
|                                              |                                         | (17)      |
|                                              | 404060001                               | ,000      |
|                                              | 404060002                               | ,000      |
|                                              | 404310003                               | ,000      |
|                                              | 404310004                               | ,000      |
|                                              | 502300005                               | ,000      |
|                                              | 502300006                               | ,000      |
|                                              | 502300007                               | ,000      |
|                                              | 502300214                               | ,000      |
|                                              | 502300411                               | ,000      |
|                                              | 502300415                               | ,000      |
|                                              | 502300416                               | ,000      |
|                                              | 502300811                               | ,000      |
|                                              | 502300913                               | ,000      |
| weekday veckodag                             | 1 måndag                                |           |
|                                              | 2 tisdag                                |           |
|                                              | 3 onsdag                                |           |
|                                              | 4 torsdag                               |           |
|                                              | 5 fredag                                |           |
|                                              | 6 lördag                                |           |
|                                              | 7 söndag                                |           |
| season säsong/period                         | 1 januari-mars                          |           |
|                                              | 2 april-maj                             |           |
|                                              | 3 juni-augusti                          |           |
|                                              | 4 september-oktober                     |           |
|                                              | 5 november-december                     |           |
| bv3 belastning vs paoncil dubbla intervallet | 1 medelbelastning                       |           |
|                                              | 2 underbelastning                       |           |
|                                              | 3 överbelastning                        |           |
| holiday större helg                          | 1 ingen större helg                     |           |
|                                              | 2 större helg (påsk/midsommar/julonyår) |           |

## Categorical Variables Codings

|                                              |                                         | Parameter |
|----------------------------------------------|-----------------------------------------|-----------|
|                                              |                                         | (18)      |
|                                              | 404060001                               | ,000      |
|                                              | 404060002                               | ,000      |
|                                              | 404310003                               | ,000      |
|                                              | 404310004                               | ,000      |
|                                              | 502300005                               | ,000      |
|                                              | 502300006                               | ,000      |
|                                              | 502300007                               | ,000      |
|                                              | 502300214                               | ,000      |
|                                              | 502300411                               | ,000      |
|                                              | 502300415                               | ,000      |
|                                              | 502300416                               | ,000      |
|                                              | 502300811                               | ,000      |
|                                              | 502300913                               | ,000      |
| weekday veckodag                             | 1 måndag                                |           |
|                                              | 2 tisdag                                |           |
|                                              | 3 onsdag                                |           |
|                                              | 4 torsdag                               |           |
|                                              | 5 fredag                                |           |
|                                              | 6 lördag                                |           |
|                                              | 7 söndag                                |           |
| season säsong/period                         | 1 januari-mars                          |           |
|                                              | 2 april-maj                             |           |
|                                              | 3 juni-augusti                          |           |
|                                              | 4 september-oktober                     |           |
|                                              | 5 november-december                     |           |
| bv3 belastning vs paoncil dubbla intervallet | 1 medelbelastning                       |           |
|                                              | 2 underbelastning                       |           |
|                                              | 3 överbelastning                        |           |
| holiday större helg                          | 1 ingen större helg                     |           |
|                                              | 2 större helg (påsk/midsommar/julonyår) |           |

## Categorical Variables Codings

|                                              |                                         | Parameter |
|----------------------------------------------|-----------------------------------------|-----------|
|                                              |                                         | (19)      |
|                                              | 404060001                               | ,000      |
|                                              | 404060002                               | ,000      |
|                                              | 404310003                               | ,000      |
|                                              | 404310004                               | ,000      |
|                                              | 502300005                               | ,000      |
|                                              | 502300006                               | ,000      |
|                                              | 502300007                               | ,000      |
|                                              | 502300214                               | ,000      |
|                                              | 502300411                               | ,000      |
|                                              | 502300415                               | ,000      |
|                                              | 502300416                               | ,000      |
|                                              | 502300811                               | ,000      |
|                                              | 502300913                               | ,000      |
| weekday veckodag                             | 1 måndag                                |           |
|                                              | 2 tisdag                                |           |
|                                              | 3 onsdag                                |           |
|                                              | 4 torsdag                               |           |
|                                              | 5 fredag                                |           |
|                                              | 6 lördag                                |           |
|                                              | 7 söndag                                |           |
| season säsong/period                         | 1 januari-mars                          |           |
|                                              | 2 april-maj                             |           |
|                                              | 3 juni-augusti                          |           |
|                                              | 4 september-oktober                     |           |
|                                              | 5 november-december                     |           |
| bv3 belastning vs paoncil dubbla intervallet | 1 medelbelastning                       |           |
|                                              | 2 underbelastning                       |           |
|                                              | 3 överbelastning                        |           |
| holiday större helg                          | 1 ingen större helg                     |           |
|                                              | 2 större helg (påsk/midsommar/julonyår) |           |

## Categorical Variables Codings

|                                              |                                         | Parameter |
|----------------------------------------------|-----------------------------------------|-----------|
|                                              |                                         | (20)      |
|                                              | 404060001                               | ,000      |
|                                              | 404060002                               | ,000      |
|                                              | 404310003                               | ,000      |
|                                              | 404310004                               | ,000      |
|                                              | 502300005                               | ,000      |
|                                              | 502300006                               | ,000      |
|                                              | 502300007                               | ,000      |
|                                              | 502300214                               | ,000      |
|                                              | 502300411                               | ,000      |
|                                              | 502300415                               | ,000      |
|                                              | 502300416                               | ,000      |
|                                              | 502300811                               | ,000      |
|                                              | 502300913                               | ,000      |
| weekday veckodag                             | 1 måndag                                |           |
|                                              | 2 tisdag                                |           |
|                                              | 3 onsdag                                |           |
|                                              | 4 torsdag                               |           |
|                                              | 5 fredag                                |           |
|                                              | 6 lördag                                |           |
|                                              | 7 söndag                                |           |
| season säsong/period                         | 1 januari-mars                          |           |
|                                              | 2 april-maj                             |           |
|                                              | 3 juni-augusti                          |           |
|                                              | 4 september-oktober                     |           |
|                                              | 5 november-december                     |           |
| bv3 belasnting vs paoncil dubbla intervallet | 1 medelbelastning                       |           |
|                                              | 2 underbelastning                       |           |
|                                              | 3 överbelastning                        |           |
| holiday större helg                          | 1 ingen större helg                     |           |
|                                              | 2 större helg (påsk/midsommar/julonyår) |           |

## Categorical Variables Codings

|                                              |                                         | Parameter |
|----------------------------------------------|-----------------------------------------|-----------|
|                                              |                                         | (21)      |
|                                              | 404060001                               | ,000      |
|                                              | 404060002                               | ,000      |
|                                              | 404310003                               | ,000      |
|                                              | 404310004                               | ,000      |
|                                              | 502300005                               | ,000      |
|                                              | 502300006                               | ,000      |
|                                              | 502300007                               | ,000      |
|                                              | 502300214                               | ,000      |
|                                              | 502300411                               | ,000      |
|                                              | 502300415                               | ,000      |
|                                              | 502300416                               | ,000      |
|                                              | 502300811                               | ,000      |
|                                              | 502300913                               | ,000      |
| weekday veckodag                             | 1 måndag                                |           |
|                                              | 2 tisdag                                |           |
|                                              | 3 onsdag                                |           |
|                                              | 4 torsdag                               |           |
|                                              | 5 fredag                                |           |
|                                              | 6 lördag                                |           |
|                                              | 7 söndag                                |           |
| season säsong/period                         | 1 januari-mars                          |           |
|                                              | 2 april-maj                             |           |
|                                              | 3 juni-augusti                          |           |
|                                              | 4 september-oktober                     |           |
|                                              | 5 november-december                     |           |
| bv3 belastning vs paoncil dubbla intervallet | 1 medelbelastning                       |           |
|                                              | 2 underbelastning                       |           |
|                                              | 3 överbelastning                        |           |
| holiday större helg                          | 1 ingen större helg                     |           |
|                                              | 2 större helg (påsk/midsommar/julonyår) |           |



## Categorical Variables Codings

|                                              |                                         | Parameter |
|----------------------------------------------|-----------------------------------------|-----------|
|                                              |                                         | (22)      |
|                                              | 404060001                               | ,000      |
|                                              | 404060002                               | ,000      |
|                                              | 404310003                               | ,000      |
|                                              | 404310004                               | ,000      |
|                                              | 502300005                               | ,000      |
|                                              | 502300006                               | ,000      |
|                                              | 502300007                               | ,000      |
|                                              | 502300214                               | ,000      |
|                                              | 502300411                               | ,000      |
|                                              | 502300415                               | ,000      |
|                                              | 502300416                               | ,000      |
|                                              | 502300811                               | ,000      |
|                                              | 502300913                               | ,000      |
| weekday veckodag                             | 1 måndag                                |           |
|                                              | 2 tisdag                                |           |
|                                              | 3 onsdag                                |           |
|                                              | 4 torsdag                               |           |
|                                              | 5 fredag                                |           |
|                                              | 6 lördag                                |           |
|                                              | 7 söndag                                |           |
| season säsong/period                         | 1 januari-mars                          |           |
|                                              | 2 april-maj                             |           |
|                                              | 3 juni-augusti                          |           |
|                                              | 4 september-oktober                     |           |
|                                              | 5 november-december                     |           |
| bv3 belasnting vs paoncil dubbla intervallet | 1 medelbelastning                       |           |
|                                              | 2 underbelastning                       |           |
|                                              | 3 överbelastning                        |           |
| holiday större helg                          | 1 ingen större helg                     |           |
|                                              | 2 större helg (påsk/midsommar/julonyår) |           |

## Categorical Variables Codings

|                                              |                                         | Parameter |
|----------------------------------------------|-----------------------------------------|-----------|
|                                              |                                         | (23)      |
|                                              | 404060001                               | 1,000     |
|                                              | 404060002                               | ,000      |
|                                              | 404310003                               | ,000      |
|                                              | 404310004                               | ,000      |
|                                              | 502300005                               | ,000      |
|                                              | 502300006                               | ,000      |
|                                              | 502300007                               | ,000      |
|                                              | 502300214                               | ,000      |
|                                              | 502300411                               | ,000      |
|                                              | 502300415                               | ,000      |
|                                              | 502300416                               | ,000      |
|                                              | 502300811                               | ,000      |
|                                              | 502300913                               | ,000      |
| weekday veckodag                             | 1 måndag                                |           |
|                                              | 2 tisdag                                |           |
|                                              | 3 onsdag                                |           |
|                                              | 4 torsdag                               |           |
|                                              | 5 fredag                                |           |
|                                              | 6 lördag                                |           |
|                                              | 7 söndag                                |           |
| season säsong/period                         | 1 januari-mars                          |           |
|                                              | 2 april-maj                             |           |
|                                              | 3 juni-augusti                          |           |
|                                              | 4 september-oktober                     |           |
|                                              | 5 november-december                     |           |
| bv3 belasnting vs paoncil dubbla intervallet | 1 medelbelastning                       |           |
|                                              | 2 underbelastning                       |           |
|                                              | 3 överbelastning                        |           |
| holiday större helg                          | 1 ingen större helg                     |           |
|                                              | 2 större helg (påsk/midsommar/julonyår) |           |

## Categorical Variables Codings

|                                              |                                         | Parameter |
|----------------------------------------------|-----------------------------------------|-----------|
|                                              |                                         | (24)      |
|                                              | 404060001                               | ,000      |
|                                              | 404060002                               | 1,000     |
|                                              | 404310003                               | ,000      |
|                                              | 404310004                               | ,000      |
|                                              | 502300005                               | ,000      |
|                                              | 502300006                               | ,000      |
|                                              | 502300007                               | ,000      |
|                                              | 502300214                               | ,000      |
|                                              | 502300411                               | ,000      |
|                                              | 502300415                               | ,000      |
|                                              | 502300416                               | ,000      |
|                                              | 502300811                               | ,000      |
|                                              | 502300913                               | ,000      |
| weekday veckodag                             | 1 måndag                                |           |
|                                              | 2 tisdag                                |           |
|                                              | 3 onsdag                                |           |
|                                              | 4 torsdag                               |           |
|                                              | 5 fredag                                |           |
|                                              | 6 lördag                                |           |
|                                              | 7 söndag                                |           |
| season säsong/period                         | 1 januari-mars                          |           |
|                                              | 2 april-maj                             |           |
|                                              | 3 juni-augusti                          |           |
|                                              | 4 september-oktober                     |           |
|                                              | 5 november-december                     |           |
| bv3 belastning vs paoncil dubbla intervallet | 1 medelbelastning                       |           |
|                                              | 2 underbelastning                       |           |
|                                              | 3 överbelastning                        |           |
| holiday större helg                          | 1 ingen större helg                     |           |
|                                              | 2 större helg (påsk/midsommar/julonyår) |           |

## Categorical Variables Codings

|                                              |                                         | Parameter |
|----------------------------------------------|-----------------------------------------|-----------|
|                                              |                                         | (25)      |
|                                              | 404060001                               | ,000      |
|                                              | 404060002                               | ,000      |
|                                              | 404310003                               | 1,000     |
|                                              | 404310004                               | ,000      |
|                                              | 502300005                               | ,000      |
|                                              | 502300006                               | ,000      |
|                                              | 502300007                               | ,000      |
|                                              | 502300214                               | ,000      |
|                                              | 502300411                               | ,000      |
|                                              | 502300415                               | ,000      |
|                                              | 502300416                               | ,000      |
|                                              | 502300811                               | ,000      |
|                                              | 502300913                               | ,000      |
| weekday veckodag                             | 1 måndag                                |           |
|                                              | 2 tisdag                                |           |
|                                              | 3 onsdag                                |           |
|                                              | 4 torsdag                               |           |
|                                              | 5 fredag                                |           |
|                                              | 6 lördag                                |           |
|                                              | 7 söndag                                |           |
| season säsong/period                         | 1 januari-mars                          |           |
|                                              | 2 april-maj                             |           |
|                                              | 3 juni-augusti                          |           |
|                                              | 4 september-oktober                     |           |
|                                              | 5 november-december                     |           |
| bv3 belasnting vs paoncil dubbla intervallet | 1 medelbelastning                       |           |
|                                              | 2 underbelastning                       |           |
|                                              | 3 överbelastning                        |           |
| holiday större helg                          | 1 ingen större helg                     |           |
|                                              | 2 större helg (påsk/midsommar/julonyår) |           |

## Categorical Variables Codings

|                                              |                                         | Parameter |
|----------------------------------------------|-----------------------------------------|-----------|
|                                              |                                         | (26)      |
|                                              | 404060001                               | ,000      |
|                                              | 404060002                               | ,000      |
|                                              | 404310003                               | ,000      |
|                                              | 404310004                               | 1,000     |
|                                              | 502300005                               | ,000      |
|                                              | 502300006                               | ,000      |
|                                              | 502300007                               | ,000      |
|                                              | 502300214                               | ,000      |
|                                              | 502300411                               | ,000      |
|                                              | 502300415                               | ,000      |
|                                              | 502300416                               | ,000      |
|                                              | 502300811                               | ,000      |
|                                              | 502300913                               | ,000      |
| weekday veckodag                             | 1 måndag                                |           |
|                                              | 2 tisdag                                |           |
|                                              | 3 onsdag                                |           |
|                                              | 4 torsdag                               |           |
|                                              | 5 fredag                                |           |
|                                              | 6 lördag                                |           |
|                                              | 7 söndag                                |           |
| season säsong/period                         | 1 januari-mars                          |           |
|                                              | 2 april-maj                             |           |
|                                              | 3 juni-augusti                          |           |
|                                              | 4 september-oktober                     |           |
|                                              | 5 november-december                     |           |
| bv3 belasnting vs paoncil dubbla intervallet | 1 medelbelastning                       |           |
|                                              | 2 underbelastning                       |           |
|                                              | 3 överbelastning                        |           |
| holiday större helg                          | 1 ingen större helg                     |           |
|                                              | 2 större helg (påsk/midsommar/julonyår) |           |

## Categorical Variables Codings

|                                              |                                         | Parameter |
|----------------------------------------------|-----------------------------------------|-----------|
|                                              |                                         | (27)      |
|                                              | 404060001                               | ,000      |
|                                              | 404060002                               | ,000      |
|                                              | 404310003                               | ,000      |
|                                              | 404310004                               | ,000      |
|                                              | 502300005                               | 1,000     |
|                                              | 502300006                               | ,000      |
|                                              | 502300007                               | ,000      |
|                                              | 502300214                               | ,000      |
|                                              | 502300411                               | ,000      |
|                                              | 502300415                               | ,000      |
|                                              | 502300416                               | ,000      |
|                                              | 502300811                               | ,000      |
|                                              | 502300913                               | ,000      |
| weekday veckodag                             | 1 måndag                                |           |
|                                              | 2 tisdag                                |           |
|                                              | 3 onsdag                                |           |
|                                              | 4 torsdag                               |           |
|                                              | 5 fredag                                |           |
|                                              | 6 lördag                                |           |
|                                              | 7 söndag                                |           |
| season säsong/period                         | 1 januari-mars                          |           |
|                                              | 2 april-maj                             |           |
|                                              | 3 juni-augusti                          |           |
|                                              | 4 september-oktober                     |           |
|                                              | 5 november-december                     |           |
| bv3 belasnting vs paoncil dubbla intervallet | 1 medelbelastning                       |           |
|                                              | 2 underbelastning                       |           |
|                                              | 3 överbelastning                        |           |
| holiday större helg                          | 1 ingen större helg                     |           |
|                                              | 2 större helg (påsk/midsommar/julonyår) |           |

## Categorical Variables Codings

|                                              |                                         | Parameter |
|----------------------------------------------|-----------------------------------------|-----------|
|                                              |                                         | (28)      |
|                                              | 404060001                               | ,000      |
|                                              | 404060002                               | ,000      |
|                                              | 404310003                               | ,000      |
|                                              | 404310004                               | ,000      |
|                                              | 502300005                               | ,000      |
|                                              | 502300006                               | 1,000     |
|                                              | 502300007                               | ,000      |
|                                              | 502300214                               | ,000      |
|                                              | 502300411                               | ,000      |
|                                              | 502300415                               | ,000      |
|                                              | 502300416                               | ,000      |
|                                              | 502300811                               | ,000      |
|                                              | 502300913                               | ,000      |
| weekday veckodag                             | 1 måndag                                |           |
|                                              | 2 tisdag                                |           |
|                                              | 3 onsdag                                |           |
|                                              | 4 torsdag                               |           |
|                                              | 5 fredag                                |           |
|                                              | 6 lördag                                |           |
|                                              | 7 söndag                                |           |
| season säsong/period                         | 1 januari-mars                          |           |
|                                              | 2 april-maj                             |           |
|                                              | 3 juni-augusti                          |           |
|                                              | 4 september-oktober                     |           |
|                                              | 5 november-december                     |           |
| bv3 belasnting vs paoncil dubbla intervallet | 1 medelbelastning                       |           |
|                                              | 2 underbelastning                       |           |
|                                              | 3 överbelastning                        |           |
| holiday större helg                          | 1 ingen större helg                     |           |
|                                              | 2 större helg (påsk/midsommar/julonyår) |           |

## Categorical Variables Codings

|                                              |                                         | Parameter |
|----------------------------------------------|-----------------------------------------|-----------|
|                                              |                                         | (29)      |
|                                              | 404060001                               | ,000      |
|                                              | 404060002                               | ,000      |
|                                              | 404310003                               | ,000      |
|                                              | 404310004                               | ,000      |
|                                              | 502300005                               | ,000      |
|                                              | 502300006                               | ,000      |
|                                              | 502300007                               | 1,000     |
|                                              | 502300214                               | ,000      |
|                                              | 502300411                               | ,000      |
|                                              | 502300415                               | ,000      |
|                                              | 502300416                               | ,000      |
|                                              | 502300811                               | ,000      |
|                                              | 502300913                               | ,000      |
| weekday veckodag                             | 1 måndag                                |           |
|                                              | 2 tisdag                                |           |
|                                              | 3 onsdag                                |           |
|                                              | 4 torsdag                               |           |
|                                              | 5 fredag                                |           |
|                                              | 6 lördag                                |           |
|                                              | 7 söndag                                |           |
| season säsong/period                         | 1 januari-mars                          |           |
|                                              | 2 april-maj                             |           |
|                                              | 3 juni-augusti                          |           |
|                                              | 4 september-oktober                     |           |
|                                              | 5 november-december                     |           |
| bv3 belasnting vs paoncil dubbla intervallet | 1 medelbelastning                       |           |
|                                              | 2 underbelastning                       |           |
|                                              | 3 överbelastning                        |           |
| holiday större helg                          | 1 ingen större helg                     |           |
|                                              | 2 större helg (påsk/midsommar/julonyår) |           |



## Categorical Variables Codings

|                                              |                                         | Parameter |
|----------------------------------------------|-----------------------------------------|-----------|
|                                              |                                         | (30)      |
|                                              | 404060001                               | ,000      |
|                                              | 404060002                               | ,000      |
|                                              | 404310003                               | ,000      |
|                                              | 404310004                               | ,000      |
|                                              | 502300005                               | ,000      |
|                                              | 502300006                               | ,000      |
|                                              | 502300007                               | ,000      |
|                                              | 502300214                               | 1,000     |
|                                              | 502300411                               | ,000      |
|                                              | 502300415                               | ,000      |
|                                              | 502300416                               | ,000      |
|                                              | 502300811                               | ,000      |
|                                              | 502300913                               | ,000      |
| weekday veckodag                             | 1 måndag                                |           |
|                                              | 2 tisdag                                |           |
|                                              | 3 onsdag                                |           |
|                                              | 4 torsdag                               |           |
|                                              | 5 fredag                                |           |
|                                              | 6 lördag                                |           |
|                                              | 7 söndag                                |           |
| season säsong/period                         | 1 januari-mars                          |           |
|                                              | 2 april-maj                             |           |
|                                              | 3 juni-augusti                          |           |
|                                              | 4 september-oktober                     |           |
|                                              | 5 november-december                     |           |
| bv3 belasnting vs paoncil dubbla intervallet | 1 medelbelastning                       |           |
|                                              | 2 underbelastning                       |           |
|                                              | 3 överbelastning                        |           |
| holiday större helg                          | 1 ingen större helg                     |           |
|                                              | 2 större helg (påsk/midsommar/julonyår) |           |

## Categorical Variables Codings

|                                              |                                         | Parameter |
|----------------------------------------------|-----------------------------------------|-----------|
|                                              |                                         | (31)      |
|                                              | 404060001                               | ,000      |
|                                              | 404060002                               | ,000      |
|                                              | 404310003                               | ,000      |
|                                              | 404310004                               | ,000      |
|                                              | 502300005                               | ,000      |
|                                              | 502300006                               | ,000      |
|                                              | 502300007                               | ,000      |
|                                              | 502300214                               | ,000      |
|                                              | 502300411                               | 1,000     |
|                                              | 502300415                               | ,000      |
|                                              | 502300416                               | ,000      |
|                                              | 502300811                               | ,000      |
|                                              | 502300913                               | ,000      |
| weekday veckodag                             | 1 måndag                                |           |
|                                              | 2 tisdag                                |           |
|                                              | 3 onsdag                                |           |
|                                              | 4 torsdag                               |           |
|                                              | 5 fredag                                |           |
|                                              | 6 lördag                                |           |
|                                              | 7 söndag                                |           |
| season säsong/period                         | 1 januari-mars                          |           |
|                                              | 2 april-maj                             |           |
|                                              | 3 juni-augusti                          |           |
|                                              | 4 september-oktober                     |           |
|                                              | 5 november-december                     |           |
| bv3 belasnting vs paoncil dubbla intervallet | 1 medelbelastning                       |           |
|                                              | 2 underbelastning                       |           |
|                                              | 3 överbelastning                        |           |
| holiday större helg                          | 1 ingen större helg                     |           |
|                                              | 2 större helg (påsk/midsommar/julonyår) |           |

## Categorical Variables Codings

|                                              |                                         | Parameter |
|----------------------------------------------|-----------------------------------------|-----------|
|                                              |                                         | (32)      |
|                                              | 404060001                               | ,000      |
|                                              | 404060002                               | ,000      |
|                                              | 404310003                               | ,000      |
|                                              | 404310004                               | ,000      |
|                                              | 502300005                               | ,000      |
|                                              | 502300006                               | ,000      |
|                                              | 502300007                               | ,000      |
|                                              | 502300214                               | ,000      |
|                                              | 502300411                               | ,000      |
|                                              | 502300415                               | 1,000     |
|                                              | 502300416                               | ,000      |
|                                              | 502300811                               | ,000      |
|                                              | 502300913                               | ,000      |
| weekday veckodag                             | 1 måndag                                |           |
|                                              | 2 tisdag                                |           |
|                                              | 3 onsdag                                |           |
|                                              | 4 torsdag                               |           |
|                                              | 5 fredag                                |           |
|                                              | 6 lördag                                |           |
|                                              | 7 söndag                                |           |
| season säsong/period                         | 1 januari-mars                          |           |
|                                              | 2 april-maj                             |           |
|                                              | 3 juni-augusti                          |           |
|                                              | 4 september-oktober                     |           |
|                                              | 5 november-december                     |           |
| bv3 belasnting vs paoncil dubbla intervallet | 1 medelbelastning                       |           |
|                                              | 2 underbelastning                       |           |
|                                              | 3 överbelastning                        |           |
| holiday större helg                          | 1 ingen större helg                     |           |
|                                              | 2 större helg (påsk/midsommar/julonyår) |           |

## Categorical Variables Codings

|                                              |                                         | Parameter |
|----------------------------------------------|-----------------------------------------|-----------|
|                                              |                                         | (33)      |
|                                              | 404060001                               | ,000      |
|                                              | 404060002                               | ,000      |
|                                              | 404310003                               | ,000      |
|                                              | 404310004                               | ,000      |
|                                              | 502300005                               | ,000      |
|                                              | 502300006                               | ,000      |
|                                              | 502300007                               | ,000      |
|                                              | 502300214                               | ,000      |
|                                              | 502300411                               | ,000      |
|                                              | 502300415                               | ,000      |
|                                              | 502300416                               | 1,000     |
|                                              | 502300811                               | ,000      |
|                                              | 502300913                               | ,000      |
| weekday veckodag                             | 1 måndag                                |           |
|                                              | 2 tisdag                                |           |
|                                              | 3 onsdag                                |           |
|                                              | 4 torsdag                               |           |
|                                              | 5 fredag                                |           |
|                                              | 6 lördag                                |           |
|                                              | 7 söndag                                |           |
| season säsong/period                         | 1 januari-mars                          |           |
|                                              | 2 april-maj                             |           |
|                                              | 3 juni-augusti                          |           |
|                                              | 4 september-oktober                     |           |
|                                              | 5 november-december                     |           |
| bv3 belasnting vs paoncil dubbla intervallet | 1 medelbelastning                       |           |
|                                              | 2 underbelastning                       |           |
|                                              | 3 överbelastning                        |           |
| holiday större helg                          | 1 ingen större helg                     |           |
|                                              | 2 större helg (påsk/midsommar/julonyår) |           |

## Categorical Variables Codings

|                                              |                                         | Parameter |
|----------------------------------------------|-----------------------------------------|-----------|
|                                              |                                         | (34)      |
|                                              | 404060001                               | ,000      |
|                                              | 404060002                               | ,000      |
|                                              | 404310003                               | ,000      |
|                                              | 404310004                               | ,000      |
|                                              | 502300005                               | ,000      |
|                                              | 502300006                               | ,000      |
|                                              | 502300007                               | ,000      |
|                                              | 502300214                               | ,000      |
|                                              | 502300411                               | ,000      |
|                                              | 502300415                               | ,000      |
|                                              | 502300416                               | ,000      |
|                                              | 502300811                               | 1,000     |
|                                              | 502300913                               | ,000      |
| weekday veckodag                             | 1 måndag                                |           |
|                                              | 2 tisdag                                |           |
|                                              | 3 onsdag                                |           |
|                                              | 4 torsdag                               |           |
|                                              | 5 fredag                                |           |
|                                              | 6 lördag                                |           |
|                                              | 7 söndag                                |           |
| season säsong/period                         | 1 januari-mars                          |           |
|                                              | 2 april-maj                             |           |
|                                              | 3 juni-augusti                          |           |
|                                              | 4 september-oktober                     |           |
|                                              | 5 november-december                     |           |
| bv3 belastning vs paoncil dubbla intervallet | 1 medelbelastning                       |           |
|                                              | 2 underbelastning                       |           |
|                                              | 3 överbelastning                        |           |
| holiday större helg                          | 1 ingen större helg                     |           |
|                                              | 2 större helg (påsk/midsommar/julonyår) |           |

## Categorical Variables Codings

|                                              |                                         | Paramete... |
|----------------------------------------------|-----------------------------------------|-------------|
|                                              |                                         | (35)        |
|                                              | 404060001                               | ,000        |
|                                              | 404060002                               | ,000        |
|                                              | 404310003                               | ,000        |
|                                              | 404310004                               | ,000        |
|                                              | 502300005                               | ,000        |
|                                              | 502300006                               | ,000        |
|                                              | 502300007                               | ,000        |
|                                              | 502300214                               | ,000        |
|                                              | 502300411                               | ,000        |
|                                              | 502300415                               | ,000        |
|                                              | 502300416                               | ,000        |
|                                              | 502300811                               | ,000        |
|                                              | 502300913                               | 1,000       |
| weekday veckodag                             | 1 måndag                                |             |
|                                              | 2 tisdag                                |             |
|                                              | 3 onsdag                                |             |
|                                              | 4 torsdag                               |             |
|                                              | 5 fredag                                |             |
|                                              | 6 lördag                                |             |
|                                              | 7 söndag                                |             |
| season säsong/period                         | 1 januari-mars                          |             |
|                                              | 2 april-maj                             |             |
|                                              | 3 juni-augusti                          |             |
|                                              | 4 september-oktober                     |             |
|                                              | 5 november-december                     |             |
| bv3 belasnting vs paoncil dubbla intervallet | 1 medelbelastning                       |             |
|                                              | 2 underbelastning                       |             |
|                                              | 3 överbelastning                        |             |
| holiday större helg                          | 1 ingen större helg                     |             |
|                                              | 2 större helg (påsk/midsommar/julonyår) |             |

## Block 0: Beginning Block

Classification Table<sup>a,b</sup>

| Observed           |                             |                      | Predicted                   |                      |
|--------------------|-----------------------------|----------------------|-----------------------------|----------------------|
|                    |                             |                      | dod01 dödsfall ja eller nej |                      |
|                    |                             |                      | 0 inget dödsfall            | 1 minst ett dödsfall |
| Step 0             | dod01 dödsfall ja eller nej | 0 inget dödsfall     | 11839                       | 0                    |
|                    |                             | 1 minst ett dödsfall | 636                         | 0                    |
| Overall Percentage |                             |                      |                             |                      |

Classification Table<sup>a,b</sup>

| Observed           |                             |                      | Predicted          |
|--------------------|-----------------------------|----------------------|--------------------|
|                    |                             |                      | Percentage Correct |
| Step 0             | dod01 dödsfall ja eller nej | 0 inget dödsfall     | 100,0              |
|                    |                             | 1 minst ett dödsfall | ,0                 |
| Overall Percentage |                             |                      | 94,9               |

a. Constant is included in the model.

b. The cut value is ,500

Variables in the Equation

|                 | B      | S.E. | Wald     | df | Sig. | Exp(B) |
|-----------------|--------|------|----------|----|------|--------|
| Step 0 Constant | -2,924 | ,041 | 5160,279 | 1  | ,000 | ,054   |

## Variables not in the Equation

|        |           |            | Score   | df | Sig. |
|--------|-----------|------------|---------|----|------|
| Step 0 | Variables | bv3        | 50,436  | 2  | ,000 |
|        |           | bv3(1)     | 34,100  | 1  | ,000 |
|        |           | bv3(2)     | 23,966  | 1  | ,000 |
|        |           | VASTY2     | 635,545 | 35 | ,000 |
|        |           | VASTY2(1)  | 2,519   | 1  | ,113 |
|        |           | VASTY2(2)  | 6,299   | 1  | ,012 |
|        |           | VASTY2(3)  | 8,957   | 1  | ,003 |
|        |           | VASTY2(4)  | ,151    | 1  | ,698 |
|        |           | VASTY2(5)  | 7,537   | 1  | ,006 |
|        |           | VASTY2(6)  | 20,142  | 1  | ,000 |
|        |           | VASTY2(7)  | 127,387 | 1  | ,000 |
|        |           | VASTY2(8)  | 8,957   | 1  | ,003 |
|        |           | VASTY2(9)  | ,163    | 1  | ,687 |
|        |           | VASTY2(10) | 7,570   | 1  | ,006 |
|        |           | VASTY2(11) | ,113    | 1  | ,737 |
|        |           | VASTY2(12) | 47,021  | 1  | ,000 |
|        |           | VASTY2(13) | 90,515  | 1  | ,000 |
|        |           | VASTY2(14) | 7,570   | 1  | ,006 |
|        |           | VASTY2(15) | ,151    | 1  | ,698 |
|        |           | VASTY2(16) | 4,298   | 1  | ,038 |
|        |           | VASTY2(17) | 20,199  | 1  | ,000 |
|        |           | VASTY2(18) | 17,916  | 1  | ,000 |
|        |           | VASTY2(19) | 18,086  | 1  | ,000 |
|        |           | VASTY2(20) | 10,563  | 1  | ,001 |
|        |           | VASTY2(21) | 1,696   | 1  | ,193 |
|        |           | VASTY2(22) | 26,693  | 1  | ,000 |
|        |           | VASTY2(23) | 1,125   | 1  | ,289 |
|        |           | VASTY2(24) | 72,662  | 1  | ,000 |
|        |           | VASTY2(25) | 2,477   | 1  | ,116 |
|        |           | VASTY2(26) | 16,006  | 1  | ,000 |
|        |           | VASTY2(27) | 20,256  | 1  | ,000 |
|        |           | VASTY2(28) | 12,309  | 1  | ,000 |
|        |           | VASTY2(29) | 20,256  | 1  | ,000 |
|        |           | VASTY2(30) | 1,263   | 1  | ,261 |
|        |           | VASTY2(31) | 20,256  | 1  | ,000 |
|        |           | VASTY2(32) | 15,810  | 1  | ,000 |
|        |           | VASTY2(33) | 17,973  | 1  | ,000 |
|        |           | VASTY2(34) | ,693    | 1  | ,405 |
|        |           | VASTY2(35) | 17,360  | 1  | ,000 |
|        |           | weekday    | 2,920   | 6  | ,819 |
|        |           | weekday(1) | ,422    | 1  | ,516 |
|        |           | weekday(2) | ,103    | 1  | ,749 |
|        |           | weekday(3) | ,575    | 1  | ,448 |



## Variables not in the Equation

|                    | Score   | df | Sig. |
|--------------------|---------|----|------|
| weekday(4)         | ,109    | 1  | ,741 |
| weekday(5)         | ,165    | 1  | ,685 |
| weekday(6)         | 1,908   | 1  | ,167 |
| holiday(1)         | ,270    | 1  | ,603 |
| season             | 9,040   | 4  | ,060 |
| season(1)          | ,504    | 1  | ,478 |
| season(2)          | 2,866   | 1  | ,090 |
| season(3)          | ,328    | 1  | ,567 |
| season(4)          | 7,145   | 1  | ,008 |
| Overall Statistics | 660,652 | 48 | ,000 |

## Block 1: Method = Enter

## Omnibus Tests of Model Coefficients

|             | Chi-square | df | Sig. |
|-------------|------------|----|------|
| Step 1 Step | 730,904    | 48 | ,000 |
| Block       | 730,904    | 48 | ,000 |
| Model       | 730,904    | 48 | ,000 |

## Model Summary

| Step | -2 Log likelihood     | Cox & Snell R Square | Nagelkerke R Square |
|------|-----------------------|----------------------|---------------------|
| 1    | 4293,939 <sup>a</sup> | ,057                 | ,172                |

a. Estimation terminated at iteration number 20 because maximum iterations has been reached. Final solution cannot be found.

Classification Table<sup>a</sup>

|                    |                      | Predicted                   |                  |
|--------------------|----------------------|-----------------------------|------------------|
|                    |                      | dod01 dödsfall ja eller nej | 0 inget dödsfall |
| Observed           | 0 inget dödsfall     | 11839                       | 0                |
|                    | 1 minst ett dödsfall | 636                         | 0                |
| Overall Percentage |                      |                             |                  |

Classification Table<sup>a</sup>

|                    |                      | Predicted        |                      |
|--------------------|----------------------|------------------|----------------------|
|                    |                      | 0 inget dödsfall | 1 minst ett dödsfall |
| Observed           | 0 inget dödsfall     | 100,0            | ,0                   |
|                    | 1 minst ett dödsfall |                  |                      |
| Overall Percentage |                      | 94,9             |                      |

a. The cut value is ,500

## Variables in the Equation

|                         | B       | S.E.     | Wald    | df | Sig. | Exp(B) |
|-------------------------|---------|----------|---------|----|------|--------|
| Step 1 <sup>a</sup> bv3 |         |          | 14,871  | 2  | ,001 |        |
| bv3(1)                  | -,373   | ,200     | 3,457   | 1  | ,063 | ,689   |
| bv3(2)                  | ,384    | ,118     | 10,660  | 1  | ,001 | 1,468  |
| VASTY2                  |         |          | 212,522 | 35 | ,000 |        |
| VASTY2(1)               | ,640    | ,343     | 3,486   | 1  | ,062 | 1,897  |
| VASTY2(2)               | ,754    | ,335     | 5,073   | 1  | ,024 | 2,125  |
| VASTY2(3)               | ,675    | ,335     | 4,062   | 1  | ,044 | 1,964  |
| VASTY2(4)               | ,061    | ,371     | ,027    | 1  | ,869 | 1,063  |
| VASTY2(5)               | -,812   | ,495     | 2,692   | 1  | ,101 | ,444   |
| VASTY2(6)               | -18,098 | 2097,303 | ,000    | 1  | ,993 | ,000   |
| VASTY2(7)               | 1,471   | ,313     | 22,056  | 1  | ,000 | 4,355  |
| VASTY2(8)               | ,791    | ,332     | 5,695   | 1  | ,017 | 2,207  |
| VASTY2(9)               | ,326    | ,362     | ,815    | 1  | ,367 | 1,386  |
| VASTY2(10)              | ,771    | ,333     | 5,358   | 1  | ,021 | 2,162  |
| VASTY2(11)              | ,349    | ,357     | ,956    | 1  | ,328 | 1,418  |
| VASTY2(12)              | 1,275   | ,315     | 16,424  | 1  | ,000 | 3,579  |
| VASTY2(13)              | 1,454   | ,310     | 22,079  | 1  | ,000 | 4,282  |
| VASTY2(14)              | ,743    | ,334     | 4,962   | 1  | ,026 | 2,103  |
| VASTY2(15)              | ,163    | ,369     | ,196    | 1  | ,658 | 1,178  |
| VASTY2(16)              | -,951   | ,645     | 2,172   | 1  | ,141 | ,386   |
| VASTY2(17)              | -17,984 | 2095,842 | ,000    | 1  | ,993 | ,000   |
| VASTY2(18)              | -2,702  | 1,038    | 6,775   | 1  | ,009 | ,067   |
| VASTY2(19)              | -2,457  | 1,043    | 5,543   | 1  | ,019 | ,086   |
| VASTY2(20)              | -1,478  | ,643     | 5,290   | 1  | ,021 | ,228   |
| VASTY2(21)              | ,533    | ,345     | 2,381   | 1  | ,123 | 1,704  |
| VASTY2(22)              | 1,173   | ,321     | 13,375  | 1  | ,000 | 3,232  |
| VASTY2(23)              | ,529    | ,348     | 2,310   | 1  | ,129 | 1,697  |
| VASTY2(24)              | 1,327   | ,313     | 18,027  | 1  | ,000 | 3,770  |
| VASTY2(25)              | -,216   | ,435     | ,245    | 1  | ,620 | ,806   |
| VASTY2(26)              | -18,044 | 2347,402 | ,000    | 1  | ,994 | ,000   |
| VASTY2(27)              | -18,066 | 2092,884 | ,000    | 1  | ,993 | ,000   |
| VASTY2(28)              | -18,009 | 2673,450 | ,000    | 1  | ,995 | ,000   |
| VASTY2(29)              | -18,039 | 2096,957 | ,000    | 1  | ,993 | ,000   |
| VASTY2(30)              | -,070   | ,386     | ,033    | 1  | ,856 | ,932   |
| VASTY2(31)              | -18,021 | 2089,024 | ,000    | 1  | ,993 | ,000   |
| VASTY2(32)              | -1,949  | ,762     | 6,552   | 1  | ,010 | ,142   |
| VASTY2(33)              | -2,660  | 1,039    | 6,561   | 1  | ,010 | ,070   |
| VASTY2(34)              | ,444    | ,351     | 1,603   | 1  | ,206 | 1,559  |
| VASTY2(35)              | -18,146 | 2254,372 | ,000    | 1  | ,994 | ,000   |
| weekday                 |         |          | 2,992   | 6  | ,810 |        |

## Variables in the Equation

|                     |            | 95% C.I. for EXP(B) |       |
|---------------------|------------|---------------------|-------|
|                     |            | Lower               | Upper |
| Step 1 <sup>a</sup> | bv3        |                     |       |
|                     | bv3(1)     | ,465                | 1,020 |
|                     | bv3(2)     | 1,166               | 1,849 |
|                     | VASTY2     |                     |       |
|                     | VASTY2(1)  | ,969                | 3,716 |
|                     | VASTY2(2)  | 1,103               | 4,094 |
|                     | VASTY2(3)  | 1,019               | 3,787 |
|                     | VASTY2(4)  | ,513                | 2,202 |
|                     | VASTY2(5)  | ,168                | 1,171 |
|                     | VASTY2(6)  | ,000                | .     |
|                     | VASTY2(7)  | 2,357               | 8,048 |
|                     | VASTY2(8)  | 1,152               | 4,227 |
|                     | VASTY2(9)  | ,682                | 2,816 |
|                     | VASTY2(10) | 1,125               | 4,152 |
|                     | VASTY2(11) | ,704                | 2,856 |
|                     | VASTY2(12) | 1,932               | 6,632 |
|                     | VASTY2(13) | 2,334               | 7,854 |
|                     | VASTY2(14) | 1,093               | 4,043 |
|                     | VASTY2(15) | ,571                | 2,428 |
|                     | VASTY2(16) | ,109                | 1,369 |
|                     | VASTY2(17) | ,000                | .     |
|                     | VASTY2(18) | ,009                | ,513  |
|                     | VASTY2(19) | ,011                | ,663  |
|                     | VASTY2(20) | ,065                | ,804  |
|                     | VASTY2(21) | ,866                | 3,352 |
|                     | VASTY2(22) | 1,724               | 6,061 |
|                     | VASTY2(23) | ,858                | 3,357 |
|                     | VASTY2(24) | 2,043               | 6,956 |
|                     | VASTY2(25) | ,343                | 1,892 |
|                     | VASTY2(26) | ,000                | .     |
|                     | VASTY2(27) | ,000                | .     |
|                     | VASTY2(28) | ,000                | .     |
|                     | VASTY2(29) | ,000                | .     |
|                     | VASTY2(30) | ,437                | 1,987 |
|                     | VASTY2(31) | ,000                | .     |
|                     | VASTY2(32) | ,032                | ,633  |
|                     | VASTY2(33) | ,009                | ,535  |
|                     | VASTY2(34) | ,784                | 3,100 |
|                     | VASTY2(35) | ,000                | .     |
|                     | weekday    |                     |       |

Variables in the Equation

|            | B      | S.E. | Wald    | df | Sig. | Exp(B) |
|------------|--------|------|---------|----|------|--------|
| weekday(1) | ,017   | ,152 | ,012    | 1  | ,914 | 1,017  |
| weekday(2) | -,085  | ,156 | ,294    | 1  | ,588 | ,919   |
| weekday(3) | ,027   | ,153 | ,031    | 1  | ,861 | 1,027  |
| weekday(4) | ,012   | ,154 | ,006    | 1  | ,940 | 1,012  |
| weekday(5) | -,077  | ,158 | ,240    | 1  | ,625 | ,926   |
| weekday(6) | -,196  | ,162 | 1,476   | 1  | ,224 | ,822   |
| holiday(1) | -,261  | ,256 | 1,042   | 1  | ,307 | ,770   |
| season     |        |      | 7,191   | 4  | ,126 |        |
| season(1)  | ,034   | ,129 | ,070    | 1  | ,791 | 1,035  |
| season(2)  | ,069   | ,118 | ,343    | 1  | ,558 | 1,072  |
| season(3)  | -,076  | ,132 | ,332    | 1  | ,564 | ,927   |
| season(4)  | -,292  | ,142 | 4,189   | 1  | ,041 | ,747   |
| Constant   | -3,118 | ,300 | 108,255 | 1  | ,000 | ,044   |

Variables in the Equation

|            | 95% C.I. for EXP(B) |       |
|------------|---------------------|-------|
|            | Lower               | Upper |
| weekday(1) | ,754                | 1,371 |
| weekday(2) | ,677                | 1,248 |
| weekday(3) | ,761                | 1,385 |
| weekday(4) | ,748                | 1,368 |
| weekday(5) | ,679                | 1,261 |
| weekday(6) | ,599                | 1,128 |
| holiday(1) | ,467                | 1,271 |
| season     |                     |       |
| season(1)  | ,804                | 1,331 |
| season(2)  | ,850                | 1,351 |
| season(3)  | ,715                | 1,201 |
| season(4)  | ,565                | ,988  |
| Constant   |                     |       |

a. Variable(s) entered on step 1: bv3, VASTY2, weekday, holiday, season.

LOGISTIC REGRESSION VARIABLES dod01

/METHOD=ENTER sv3 VASTY2 weekday holiday season

/CONTRAST (sv3)=Indicator(1)

/CONTRAST (VASTY2)=Indicator(1)

/CONTRAST (weekday)=Indicator(1)

/CONTRAST (holiday)=Indicator(1)

/CONTRAST (season)=Indicator(1)

/PRINT=CI(95)

/CRITERIA=PIN(0.05) POUT(0.10) ITERATE(20) CUT(0.5).

## Logistic Regression

[DataSet6] C:\cWordjan\Rafaela\_VCS\alla\_tillsammans\abo\_bjo\_vasa\_v1.sav

### Case Processing Summary

| Unweighted Cases <sup>a</sup> |                      | N     | Percent |
|-------------------------------|----------------------|-------|---------|
| Selected Cases                | Included in Analysis | 12475 | 100,0   |
|                               | Missing Cases        | 0     | ,0      |
|                               | Total                | 12475 | 100,0   |
| Unselected Cases              |                      | 0     | ,0      |
| Total                         |                      | 12475 | 100,0   |

a. If weight is in effect, see classification table for the total number of cases.

### Dependent Variable Encoding

| Original Value       | Internal Value |
|----------------------|----------------|
| 0 inget dödsfall     | 0              |
| 1 minst ett dödsfall | 1              |

### Categorical Variables Codings

|                                     | Frequency | Parameter |
|-------------------------------------|-----------|-----------|
|                                     |           | (1)       |
| VASTY2 (SAIR*10000)+VASTY 403073101 | 365       | ,000      |
| 403073102                           | 362       | 1,000     |
| 403073103                           | 365       | ,000      |
| 403073202                           | 365       | ,000      |
| 403073203                           | 365       | ,000      |
| 403073204                           | 330       | ,000      |
| 403073303                           | 364       | ,000      |
| 403073651                           | 362       | ,000      |
| 403073771                           | 365       | ,000      |
| 403133102                           | 341       | ,000      |
| 403133106                           | 365       | ,000      |
| 403133107                           | 365       | ,000      |
| 403133109                           | 365       | ,000      |
| 403133202                           | 365       | ,000      |
| 403133203                           | 365       | ,000      |
| 403133204                           | 365       | ,000      |
| 403133315                           | 177       | ,000      |
| 403133322                           | 365       | ,000      |
| 403133401                           | 362       | ,000      |
| 403133402                           | 365       | ,000      |
| 403133550                           | 298       | ,000      |
| 403133772                           | 365       | ,000      |
| 403135803                           | 365       | ,000      |

## Categorical Variables Codings

|                           |           | Parameter coding |       |
|---------------------------|-----------|------------------|-------|
|                           |           | (2)              | (3)   |
| VASTY2 (SAIR*10000)+VASTY | 403073101 | ,000             | ,000  |
|                           | 403073102 | ,000             | ,000  |
|                           | 403073103 | 1,000            | ,000  |
|                           | 403073202 | ,000             | 1,000 |
|                           | 403073203 | ,000             | ,000  |
|                           | 403073204 | ,000             | ,000  |
|                           | 403073303 | ,000             | ,000  |
|                           | 403073651 | ,000             | ,000  |
|                           | 403073771 | ,000             | ,000  |
|                           | 403133102 | ,000             | ,000  |
|                           | 403133106 | ,000             | ,000  |
|                           | 403133107 | ,000             | ,000  |
|                           | 403133109 | ,000             | ,000  |
|                           | 403133202 | ,000             | ,000  |
|                           | 403133203 | ,000             | ,000  |
|                           | 403133204 | ,000             | ,000  |
|                           | 403133315 | ,000             | ,000  |
|                           | 403133322 | ,000             | ,000  |
|                           | 403133401 | ,000             | ,000  |
|                           | 403133402 | ,000             | ,000  |
|                           | 403133550 | ,000             | ,000  |
|                           | 403133772 | ,000             | ,000  |
|                           | 403135803 | ,000             | ,000  |

**Categorical Variables Codings**

|                           |           | Parameter coding |       |
|---------------------------|-----------|------------------|-------|
|                           |           | (4)              | (5)   |
| VASTY2 (SAIR*10000)+VASTY | 403073101 | ,000             | ,000  |
|                           | 403073102 | ,000             | ,000  |
|                           | 403073103 | ,000             | ,000  |
|                           | 403073202 | ,000             | ,000  |
|                           | 403073203 | 1,000            | ,000  |
|                           | 403073204 | ,000             | 1,000 |
|                           | 403073303 | ,000             | ,000  |
|                           | 403073651 | ,000             | ,000  |
|                           | 403073771 | ,000             | ,000  |
|                           | 403133102 | ,000             | ,000  |
|                           | 403133106 | ,000             | ,000  |
|                           | 403133107 | ,000             | ,000  |
|                           | 403133109 | ,000             | ,000  |
|                           | 403133202 | ,000             | ,000  |
|                           | 403133203 | ,000             | ,000  |
|                           | 403133204 | ,000             | ,000  |
|                           | 403133315 | ,000             | ,000  |
|                           | 403133322 | ,000             | ,000  |
|                           | 403133401 | ,000             | ,000  |
|                           | 403133402 | ,000             | ,000  |
|                           | 403133550 | ,000             | ,000  |
|                           | 403133772 | ,000             | ,000  |
|                           | 403135803 | ,000             | ,000  |

Peer Review Only

## Categorical Variables Codings

|                           |           | Parameter coding |       |
|---------------------------|-----------|------------------|-------|
|                           |           | (6)              | (7)   |
| VASTY2 (SAIR*10000)+VASTY | 403073101 | ,000             | ,000  |
|                           | 403073102 | ,000             | ,000  |
|                           | 403073103 | ,000             | ,000  |
|                           | 403073202 | ,000             | ,000  |
|                           | 403073203 | ,000             | ,000  |
|                           | 403073204 | ,000             | ,000  |
|                           | 403073303 | 1,000            | ,000  |
|                           | 403073651 | ,000             | 1,000 |
|                           | 403073771 | ,000             | ,000  |
|                           | 403133102 | ,000             | ,000  |
|                           | 403133106 | ,000             | ,000  |
|                           | 403133107 | ,000             | ,000  |
|                           | 403133109 | ,000             | ,000  |
|                           | 403133202 | ,000             | ,000  |
|                           | 403133203 | ,000             | ,000  |
|                           | 403133204 | ,000             | ,000  |
|                           | 403133315 | ,000             | ,000  |
|                           | 403133322 | ,000             | ,000  |
|                           | 403133401 | ,000             | ,000  |
|                           | 403133402 | ,000             | ,000  |
|                           | 403133550 | ,000             | ,000  |
|                           | 403133772 | ,000             | ,000  |
|                           | 403135803 | ,000             | ,000  |



**Categorical Variables Codings**

|                           |           | Parameter coding |       |
|---------------------------|-----------|------------------|-------|
|                           |           | (8)              | (9)   |
| VASTY2 (SAIR*10000)+VASTY | 403073101 | ,000             | ,000  |
|                           | 403073102 | ,000             | ,000  |
|                           | 403073103 | ,000             | ,000  |
|                           | 403073202 | ,000             | ,000  |
|                           | 403073203 | ,000             | ,000  |
|                           | 403073204 | ,000             | ,000  |
|                           | 403073303 | ,000             | ,000  |
|                           | 403073651 | ,000             | ,000  |
|                           | 403073771 | 1,000            | ,000  |
|                           | 403133102 | ,000             | 1,000 |
|                           | 403133106 | ,000             | ,000  |
|                           | 403133107 | ,000             | ,000  |
|                           | 403133109 | ,000             | ,000  |
|                           | 403133202 | ,000             | ,000  |
|                           | 403133203 | ,000             | ,000  |
|                           | 403133204 | ,000             | ,000  |
|                           | 403133315 | ,000             | ,000  |
|                           | 403133322 | ,000             | ,000  |
|                           | 403133401 | ,000             | ,000  |
|                           | 403133402 | ,000             | ,000  |
|                           | 403133550 | ,000             | ,000  |
|                           | 403133772 | ,000             | ,000  |
|                           | 403135803 | ,000             | ,000  |

Peer Review Only

## Categorical Variables Codings

|                           |           | Parameter coding |       |
|---------------------------|-----------|------------------|-------|
|                           |           | (10)             | (11)  |
| VASTY2 (SAIR*10000)+VASTY | 403073101 | ,000             | ,000  |
|                           | 403073102 | ,000             | ,000  |
|                           | 403073103 | ,000             | ,000  |
|                           | 403073202 | ,000             | ,000  |
|                           | 403073203 | ,000             | ,000  |
|                           | 403073204 | ,000             | ,000  |
|                           | 403073303 | ,000             | ,000  |
|                           | 403073651 | ,000             | ,000  |
|                           | 403073771 | ,000             | ,000  |
|                           | 403133102 | ,000             | ,000  |
|                           | 403133106 | 1,000            | ,000  |
|                           | 403133107 | ,000             | 1,000 |
|                           | 403133109 | ,000             | ,000  |
|                           | 403133202 | ,000             | ,000  |
|                           | 403133203 | ,000             | ,000  |
|                           | 403133204 | ,000             | ,000  |
|                           | 403133315 | ,000             | ,000  |
|                           | 403133322 | ,000             | ,000  |
|                           | 403133401 | ,000             | ,000  |
|                           | 403133402 | ,000             | ,000  |
|                           | 403133550 | ,000             | ,000  |
|                           | 403133772 | ,000             | ,000  |
|                           | 403135803 | ,000             | ,000  |

## Categorical Variables Codings

|                           |           | Parameter coding |       |
|---------------------------|-----------|------------------|-------|
|                           |           | (12)             | (13)  |
| VASTY2 (SAIR*10000)+VASTY | 403073101 | ,000             | ,000  |
|                           | 403073102 | ,000             | ,000  |
|                           | 403073103 | ,000             | ,000  |
|                           | 403073202 | ,000             | ,000  |
|                           | 403073203 | ,000             | ,000  |
|                           | 403073204 | ,000             | ,000  |
|                           | 403073303 | ,000             | ,000  |
|                           | 403073651 | ,000             | ,000  |
|                           | 403073771 | ,000             | ,000  |
|                           | 403133102 | ,000             | ,000  |
|                           | 403133106 | ,000             | ,000  |
|                           | 403133107 | ,000             | ,000  |
|                           | 403133109 | 1,000            | ,000  |
|                           | 403133202 | ,000             | 1,000 |
|                           | 403133203 | ,000             | ,000  |
|                           | 403133204 | ,000             | ,000  |
|                           | 403133315 | ,000             | ,000  |
|                           | 403133322 | ,000             | ,000  |
|                           | 403133401 | ,000             | ,000  |
|                           | 403133402 | ,000             | ,000  |
|                           | 403133550 | ,000             | ,000  |
|                           | 403133772 | ,000             | ,000  |
|                           | 403135803 | ,000             | ,000  |

## Categorical Variables Codings

|                           |           | Parameter coding |       |
|---------------------------|-----------|------------------|-------|
|                           |           | (14)             | (15)  |
| VASTY2 (SAIR*10000)+VASTY | 403073101 | ,000             | ,000  |
|                           | 403073102 | ,000             | ,000  |
|                           | 403073103 | ,000             | ,000  |
|                           | 403073202 | ,000             | ,000  |
|                           | 403073203 | ,000             | ,000  |
|                           | 403073204 | ,000             | ,000  |
|                           | 403073303 | ,000             | ,000  |
|                           | 403073651 | ,000             | ,000  |
|                           | 403073771 | ,000             | ,000  |
|                           | 403133102 | ,000             | ,000  |
|                           | 403133106 | ,000             | ,000  |
|                           | 403133107 | ,000             | ,000  |
|                           | 403133109 | ,000             | ,000  |
|                           | 403133202 | ,000             | ,000  |
|                           | 403133203 | 1,000            | ,000  |
|                           | 403133204 | ,000             | 1,000 |
|                           | 403133315 | ,000             | ,000  |
|                           | 403133322 | ,000             | ,000  |
|                           | 403133401 | ,000             | ,000  |
|                           | 403133402 | ,000             | ,000  |
|                           | 403133550 | ,000             | ,000  |
|                           | 403133772 | ,000             | ,000  |
|                           | 403135803 | ,000             | ,000  |

## Categorical Variables Codings

|                           |           | Parameter coding |       |
|---------------------------|-----------|------------------|-------|
|                           |           | (16)             | (17)  |
| VASTY2 (SAIR*10000)+VASTY | 403073101 | ,000             | ,000  |
|                           | 403073102 | ,000             | ,000  |
|                           | 403073103 | ,000             | ,000  |
|                           | 403073202 | ,000             | ,000  |
|                           | 403073203 | ,000             | ,000  |
|                           | 403073204 | ,000             | ,000  |
|                           | 403073303 | ,000             | ,000  |
|                           | 403073651 | ,000             | ,000  |
|                           | 403073771 | ,000             | ,000  |
|                           | 403133102 | ,000             | ,000  |
|                           | 403133106 | ,000             | ,000  |
|                           | 403133107 | ,000             | ,000  |
|                           | 403133109 | ,000             | ,000  |
|                           | 403133202 | ,000             | ,000  |
|                           | 403133203 | ,000             | ,000  |
|                           | 403133204 | ,000             | ,000  |
|                           | 403133315 | 1,000            | ,000  |
|                           | 403133322 | ,000             | 1,000 |
|                           | 403133401 | ,000             | ,000  |
|                           | 403133402 | ,000             | ,000  |
|                           | 403133550 | ,000             | ,000  |
|                           | 403133772 | ,000             | ,000  |
|                           | 403135803 | ,000             | ,000  |

## Categorical Variables Codings

|                           |           | Parameter coding |       |
|---------------------------|-----------|------------------|-------|
|                           |           | (18)             | (19)  |
| VASTY2 (SAIR*10000)+VASTY | 403073101 | ,000             | ,000  |
|                           | 403073102 | ,000             | ,000  |
|                           | 403073103 | ,000             | ,000  |
|                           | 403073202 | ,000             | ,000  |
|                           | 403073203 | ,000             | ,000  |
|                           | 403073204 | ,000             | ,000  |
|                           | 403073303 | ,000             | ,000  |
|                           | 403073651 | ,000             | ,000  |
|                           | 403073771 | ,000             | ,000  |
|                           | 403133102 | ,000             | ,000  |
|                           | 403133106 | ,000             | ,000  |
|                           | 403133107 | ,000             | ,000  |
|                           | 403133109 | ,000             | ,000  |
|                           | 403133202 | ,000             | ,000  |
|                           | 403133203 | ,000             | ,000  |
|                           | 403133204 | ,000             | ,000  |
|                           | 403133315 | ,000             | ,000  |
|                           | 403133322 | ,000             | ,000  |
|                           | 403133401 | 1,000            | ,000  |
|                           | 403133402 | ,000             | 1,000 |
|                           | 403133550 | ,000             | ,000  |
|                           | 403133772 | ,000             | ,000  |
|                           | 403135803 | ,000             | ,000  |

## Categorical Variables Codings

|                           |           | Parameter coding |       |
|---------------------------|-----------|------------------|-------|
|                           |           | (20)             | (21)  |
| VASTY2 (SAIR*10000)+VASTY | 403073101 | ,000             | ,000  |
|                           | 403073102 | ,000             | ,000  |
|                           | 403073103 | ,000             | ,000  |
|                           | 403073202 | ,000             | ,000  |
|                           | 403073203 | ,000             | ,000  |
|                           | 403073204 | ,000             | ,000  |
|                           | 403073303 | ,000             | ,000  |
|                           | 403073651 | ,000             | ,000  |
|                           | 403073771 | ,000             | ,000  |
|                           | 403133102 | ,000             | ,000  |
|                           | 403133106 | ,000             | ,000  |
|                           | 403133107 | ,000             | ,000  |
|                           | 403133109 | ,000             | ,000  |
|                           | 403133202 | ,000             | ,000  |
|                           | 403133203 | ,000             | ,000  |
|                           | 403133204 | ,000             | ,000  |
|                           | 403133315 | ,000             | ,000  |
|                           | 403133322 | ,000             | ,000  |
|                           | 403133401 | ,000             | ,000  |
|                           | 403133402 | ,000             | ,000  |
|                           | 403133550 | 1,000            | ,000  |
|                           | 403133772 | ,000             | 1,000 |
|                           | 403135803 | ,000             | ,000  |

## Categorical Variables Codings

|                           |           | Parameter coding |      |
|---------------------------|-----------|------------------|------|
|                           |           | (22)             | (23) |
| VASTY2 (SAIR*10000)+VASTY | 403073101 | ,000             | ,000 |
|                           | 403073102 | ,000             | ,000 |
|                           | 403073103 | ,000             | ,000 |
|                           | 403073202 | ,000             | ,000 |
|                           | 403073203 | ,000             | ,000 |
|                           | 403073204 | ,000             | ,000 |
|                           | 403073303 | ,000             | ,000 |
|                           | 403073651 | ,000             | ,000 |
|                           | 403073771 | ,000             | ,000 |
|                           | 403133102 | ,000             | ,000 |
|                           | 403133106 | ,000             | ,000 |
|                           | 403133107 | ,000             | ,000 |
|                           | 403133109 | ,000             | ,000 |
|                           | 403133202 | ,000             | ,000 |
|                           | 403133203 | ,000             | ,000 |
|                           | 403133204 | ,000             | ,000 |
|                           | 403133315 | ,000             | ,000 |
|                           | 403133322 | ,000             | ,000 |
|                           | 403133401 | ,000             | ,000 |
|                           | 403133402 | ,000             | ,000 |
|                           | 403133550 | ,000             | ,000 |
|                           | 403133772 | ,000             | ,000 |
|                           | 403135803 | 1,000            | ,000 |



**Categorical Variables Codings**

|                           |           | Parameter coding |      |
|---------------------------|-----------|------------------|------|
|                           |           | (24)             | (25) |
| VASTY2 (SAIR*10000)+VASTY | 403073101 | ,000             | ,000 |
|                           | 403073102 | ,000             | ,000 |
|                           | 403073103 | ,000             | ,000 |
|                           | 403073202 | ,000             | ,000 |
|                           | 403073203 | ,000             | ,000 |
|                           | 403073204 | ,000             | ,000 |
|                           | 403073303 | ,000             | ,000 |
|                           | 403073651 | ,000             | ,000 |
|                           | 403073771 | ,000             | ,000 |
|                           | 403133102 | ,000             | ,000 |
|                           | 403133106 | ,000             | ,000 |
|                           | 403133107 | ,000             | ,000 |
|                           | 403133109 | ,000             | ,000 |
|                           | 403133202 | ,000             | ,000 |
|                           | 403133203 | ,000             | ,000 |
|                           | 403133204 | ,000             | ,000 |
|                           | 403133315 | ,000             | ,000 |
|                           | 403133322 | ,000             | ,000 |
|                           | 403133401 | ,000             | ,000 |
|                           | 403133402 | ,000             | ,000 |
|                           | 403133550 | ,000             | ,000 |
|                           | 403133772 | ,000             | ,000 |
|                           | 403135803 | ,000             | ,000 |

Peer review only

## Categorical Variables Codings

|                           |           | Parameter coding |      |
|---------------------------|-----------|------------------|------|
|                           |           | (26)             | (27) |
| VASTY2 (SAIR*10000)+VASTY | 403073101 | ,000             | ,000 |
|                           | 403073102 | ,000             | ,000 |
|                           | 403073103 | ,000             | ,000 |
|                           | 403073202 | ,000             | ,000 |
|                           | 403073203 | ,000             | ,000 |
|                           | 403073204 | ,000             | ,000 |
|                           | 403073303 | ,000             | ,000 |
|                           | 403073651 | ,000             | ,000 |
|                           | 403073771 | ,000             | ,000 |
|                           | 403133102 | ,000             | ,000 |
|                           | 403133106 | ,000             | ,000 |
|                           | 403133107 | ,000             | ,000 |
|                           | 403133109 | ,000             | ,000 |
|                           | 403133202 | ,000             | ,000 |
|                           | 403133203 | ,000             | ,000 |
|                           | 403133204 | ,000             | ,000 |
|                           | 403133315 | ,000             | ,000 |
|                           | 403133322 | ,000             | ,000 |
|                           | 403133401 | ,000             | ,000 |
|                           | 403133402 | ,000             | ,000 |
|                           | 403133550 | ,000             | ,000 |
|                           | 403133772 | ,000             | ,000 |
|                           | 403135803 | ,000             | ,000 |

**Categorical Variables Codings**

|                           |           | Parameter coding |      |
|---------------------------|-----------|------------------|------|
|                           |           | (28)             | (29) |
| VASTY2 (SAIR*10000)+VASTY | 403073101 | ,000             | ,000 |
|                           | 403073102 | ,000             | ,000 |
|                           | 403073103 | ,000             | ,000 |
|                           | 403073202 | ,000             | ,000 |
|                           | 403073203 | ,000             | ,000 |
|                           | 403073204 | ,000             | ,000 |
|                           | 403073303 | ,000             | ,000 |
|                           | 403073651 | ,000             | ,000 |
|                           | 403073771 | ,000             | ,000 |
|                           | 403133102 | ,000             | ,000 |
|                           | 403133106 | ,000             | ,000 |
|                           | 403133107 | ,000             | ,000 |
|                           | 403133109 | ,000             | ,000 |
|                           | 403133202 | ,000             | ,000 |
|                           | 403133203 | ,000             | ,000 |
|                           | 403133204 | ,000             | ,000 |
|                           | 403133315 | ,000             | ,000 |
|                           | 403133322 | ,000             | ,000 |
|                           | 403133401 | ,000             | ,000 |
|                           | 403133402 | ,000             | ,000 |
|                           | 403133550 | ,000             | ,000 |
|                           | 403133772 | ,000             | ,000 |
|                           | 403135803 | ,000             | ,000 |

Peer Review Only

## Categorical Variables Codings

|                           |           | Parameter coding |      |
|---------------------------|-----------|------------------|------|
|                           |           | (30)             | (31) |
| VASTY2 (SAIR*10000)+VASTY | 403073101 | ,000             | ,000 |
|                           | 403073102 | ,000             | ,000 |
|                           | 403073103 | ,000             | ,000 |
|                           | 403073202 | ,000             | ,000 |
|                           | 403073203 | ,000             | ,000 |
|                           | 403073204 | ,000             | ,000 |
|                           | 403073303 | ,000             | ,000 |
|                           | 403073651 | ,000             | ,000 |
|                           | 403073771 | ,000             | ,000 |
|                           | 403133102 | ,000             | ,000 |
|                           | 403133106 | ,000             | ,000 |
|                           | 403133107 | ,000             | ,000 |
|                           | 403133109 | ,000             | ,000 |
|                           | 403133202 | ,000             | ,000 |
|                           | 403133203 | ,000             | ,000 |
|                           | 403133204 | ,000             | ,000 |
|                           | 403133315 | ,000             | ,000 |
|                           | 403133322 | ,000             | ,000 |
|                           | 403133401 | ,000             | ,000 |
|                           | 403133402 | ,000             | ,000 |
|                           | 403133550 | ,000             | ,000 |
|                           | 403133772 | ,000             | ,000 |
|                           | 403135803 | ,000             | ,000 |

**Categorical Variables Codings**

|                           |           | Parameter coding |      |
|---------------------------|-----------|------------------|------|
|                           |           | (32)             | (33) |
| VASTY2 (SAIR*10000)+VASTY | 403073101 | ,000             | ,000 |
|                           | 403073102 | ,000             | ,000 |
|                           | 403073103 | ,000             | ,000 |
|                           | 403073202 | ,000             | ,000 |
|                           | 403073203 | ,000             | ,000 |
|                           | 403073204 | ,000             | ,000 |
|                           | 403073303 | ,000             | ,000 |
|                           | 403073651 | ,000             | ,000 |
|                           | 403073771 | ,000             | ,000 |
|                           | 403133102 | ,000             | ,000 |
|                           | 403133106 | ,000             | ,000 |
|                           | 403133107 | ,000             | ,000 |
|                           | 403133109 | ,000             | ,000 |
|                           | 403133202 | ,000             | ,000 |
|                           | 403133203 | ,000             | ,000 |
|                           | 403133204 | ,000             | ,000 |
|                           | 403133315 | ,000             | ,000 |
|                           | 403133322 | ,000             | ,000 |
|                           | 403133401 | ,000             | ,000 |
|                           | 403133402 | ,000             | ,000 |
|                           | 403133550 | ,000             | ,000 |
|                           | 403133772 | ,000             | ,000 |
|                           | 403135803 | ,000             | ,000 |

Peer Review Only

## Categorical Variables Codings

|                           |           | Parameter coding |      |
|---------------------------|-----------|------------------|------|
|                           |           | (34)             | (35) |
| VASTY2 (SAIR*10000)+VASTY | 403073101 | ,000             | ,000 |
|                           | 403073102 | ,000             | ,000 |
|                           | 403073103 | ,000             | ,000 |
|                           | 403073202 | ,000             | ,000 |
|                           | 403073203 | ,000             | ,000 |
|                           | 403073204 | ,000             | ,000 |
|                           | 403073303 | ,000             | ,000 |
|                           | 403073651 | ,000             | ,000 |
|                           | 403073771 | ,000             | ,000 |
|                           | 403133102 | ,000             | ,000 |
|                           | 403133106 | ,000             | ,000 |
|                           | 403133107 | ,000             | ,000 |
|                           | 403133109 | ,000             | ,000 |
|                           | 403133202 | ,000             | ,000 |
|                           | 403133203 | ,000             | ,000 |
|                           | 403133204 | ,000             | ,000 |
|                           | 403133315 | ,000             | ,000 |
|                           | 403133322 | ,000             | ,000 |
|                           | 403133401 | ,000             | ,000 |
|                           | 403133402 | ,000             | ,000 |
|                           | 403133550 | ,000             | ,000 |
|                           | 403133772 | ,000             | ,000 |
|                           | 403135803 | ,000             | ,000 |

## Categorical Variables Codings

|                              |                                         | Frequency | Parameter<br>(1) |
|------------------------------|-----------------------------------------|-----------|------------------|
|                              | 404060001                               | 365       | ,000             |
|                              | 404060002                               | 366       | ,000             |
|                              | 404310003                               | 291       | ,000             |
|                              | 404310004                               | 291       | ,000             |
|                              | 502300005                               | 366       | ,000             |
|                              | 502300006                               | 225       | ,000             |
|                              | 502300007                               | 366       | ,000             |
|                              | 502300214                               | 366       | ,000             |
|                              | 502300411                               | 366       | ,000             |
|                              | 502300415                               | 360       | ,000             |
|                              | 502300416                               | 363       | ,000             |
|                              | 502300811                               | 364       | ,000             |
|                              | 502300913                               | 315       | ,000             |
| weekday veckodag             | 1 måndag                                | 1805      | ,000             |
|                              | 2 tisdag                                | 1812      | 1,000            |
|                              | 3 onsdag                                | 1800      | ,000             |
|                              | 4 torsdag                               | 1794      | ,000             |
|                              | 5 fredag                                | 1788      | ,000             |
|                              | 6 lördag                                | 1735      | ,000             |
|                              | 7 söndag                                | 1741      | ,000             |
| season säsong/period         | 1 januari-mars                          | 3182      | ,000             |
|                              | 2 april-maj                             | 2127      | 1,000            |
|                              | 3 juni-augusti                          | 2911      | ,000             |
|                              | 4 september-oktober                     | 2144      | ,000             |
|                              | 5 november-december                     | 2111      | ,000             |
| sv3 tredjedelar för standard | 1 andra tredjedelen                     | 3172      | ,000             |
|                              | 2 första tredjedelen                    | 4718      | 1,000            |
|                              | 3 tredje tredjedelen                    | 4585      | ,000             |
| holiday större helg          | 1 ingen större helg                     | 12078     | ,000             |
|                              | 2 större helg (påsk/midsommar/julonyår) | 397       | 1,000            |

## Categorical Variables Codings

|                              |                                         | Parameter coding |       |
|------------------------------|-----------------------------------------|------------------|-------|
|                              |                                         | (2)              | (3)   |
|                              | 404060001                               | ,000             | ,000  |
|                              | 404060002                               | ,000             | ,000  |
|                              | 404310003                               | ,000             | ,000  |
|                              | 404310004                               | ,000             | ,000  |
|                              | 502300005                               | ,000             | ,000  |
|                              | 502300006                               | ,000             | ,000  |
|                              | 502300007                               | ,000             | ,000  |
|                              | 502300214                               | ,000             | ,000  |
|                              | 502300411                               | ,000             | ,000  |
|                              | 502300415                               | ,000             | ,000  |
|                              | 502300416                               | ,000             | ,000  |
|                              | 502300811                               | ,000             | ,000  |
|                              | 502300913                               | ,000             | ,000  |
| weekday veckodag             | 1 måndag                                | ,000             | ,000  |
|                              | 2 tisdag                                | ,000             | ,000  |
|                              | 3 onsdag                                | 1,000            | ,000  |
|                              | 4 torsdag                               | ,000             | 1,000 |
|                              | 5 fredag                                | ,000             | ,000  |
|                              | 6 lördag                                | ,000             | ,000  |
|                              | 7 söndag                                | ,000             | ,000  |
| season säsong/period         | 1 januari-mars                          | ,000             | ,000  |
|                              | 2 april-maj                             | ,000             | ,000  |
|                              | 3 juni-augusti                          | 1,000            | ,000  |
|                              | 4 september-oktober                     | ,000             | 1,000 |
|                              | 5 november-december                     | ,000             | ,000  |
| sv3 tredjedelar för standard | 1 andra tredjedelen                     | ,000             |       |
|                              | 2 första tredjedelen                    | ,000             |       |
|                              | 3 tredje tredjedelen                    | 1,000            |       |
| holiday större helg          | 1 ingen större helg                     |                  |       |
|                              | 2 större helg (påsk/midsommar/julonyår) |                  |       |



## Categorical Variables Codings

|                              |                                         | Parameter coding |       |
|------------------------------|-----------------------------------------|------------------|-------|
|                              |                                         | (4)              | (5)   |
|                              | 404060001                               | ,000             | ,000  |
|                              | 404060002                               | ,000             | ,000  |
|                              | 404310003                               | ,000             | ,000  |
|                              | 404310004                               | ,000             | ,000  |
|                              | 502300005                               | ,000             | ,000  |
|                              | 502300006                               | ,000             | ,000  |
|                              | 502300007                               | ,000             | ,000  |
|                              | 502300214                               | ,000             | ,000  |
|                              | 502300411                               | ,000             | ,000  |
|                              | 502300415                               | ,000             | ,000  |
|                              | 502300416                               | ,000             | ,000  |
|                              | 502300811                               | ,000             | ,000  |
|                              | 502300913                               | ,000             | ,000  |
| weekday veckodag             | 1 måndag                                | ,000             | ,000  |
|                              | 2 tisdag                                | ,000             | ,000  |
|                              | 3 onsdag                                | ,000             | ,000  |
|                              | 4 torsdag                               | ,000             | ,000  |
|                              | 5 fredag                                | 1,000            | ,000  |
|                              | 6 lördag                                | ,000             | 1,000 |
|                              | 7 söndag                                | ,000             | ,000  |
| season säsong/period         | 1 januari-mars                          | ,000             |       |
|                              | 2 april-maj                             | ,000             |       |
|                              | 3 juni-augusti                          | ,000             |       |
|                              | 4 september-oktober                     | ,000             |       |
|                              | 5 november-december                     | 1,000            |       |
| sv3 tredjedelar för standard | 1 andra tredjedelen                     |                  |       |
|                              | 2 första tredjedelen                    |                  |       |
|                              | 3 tredje tredjedelen                    |                  |       |
| holiday större helg          | 1 ingen större helg                     |                  |       |
|                              | 2 större helg (påsk/midsommar/julonyår) |                  |       |

## Categorical Variables Codings

|                              |                                         | Parameter coding |      |
|------------------------------|-----------------------------------------|------------------|------|
|                              |                                         | (6)              | (7)  |
|                              | 404060001                               | ,000             | ,000 |
|                              | 404060002                               | ,000             | ,000 |
|                              | 404310003                               | ,000             | ,000 |
|                              | 404310004                               | ,000             | ,000 |
|                              | 502300005                               | ,000             | ,000 |
|                              | 502300006                               | ,000             | ,000 |
|                              | 502300007                               | ,000             | ,000 |
|                              | 502300214                               | ,000             | ,000 |
|                              | 502300411                               | ,000             | ,000 |
|                              | 502300415                               | ,000             | ,000 |
|                              | 502300416                               | ,000             | ,000 |
|                              | 502300811                               | ,000             | ,000 |
|                              | 502300913                               | ,000             | ,000 |
| weekday veckodag             | 1 måndag                                | ,000             |      |
|                              | 2 tisdag                                | ,000             |      |
|                              | 3 onsdag                                | ,000             |      |
|                              | 4 torsdag                               | ,000             |      |
|                              | 5 fredag                                | ,000             |      |
|                              | 6 lördag                                | ,000             |      |
|                              | 7 söndag                                | 1,000            |      |
| season säsong/period         | 1 januari-mars                          |                  |      |
|                              | 2 april-maj                             |                  |      |
|                              | 3 juni-augusti                          |                  |      |
|                              | 4 september-oktober                     |                  |      |
|                              | 5 november-december                     |                  |      |
| sv3 tredjedelar för standard | 1 andra tredjedelen                     |                  |      |
|                              | 2 första tredjedelen                    |                  |      |
|                              | 3 tredje tredjedelen                    |                  |      |
| holiday större helg          | 1 ingen större helg                     |                  |      |
|                              | 2 större helg (påsk/midsommar/julonyår) |                  |      |

## Categorical Variables Codings

|                              |                                         | Parameter coding |      |
|------------------------------|-----------------------------------------|------------------|------|
|                              |                                         | (8)              | (9)  |
|                              | 404060001                               | ,000             | ,000 |
|                              | 404060002                               | ,000             | ,000 |
|                              | 404310003                               | ,000             | ,000 |
|                              | 404310004                               | ,000             | ,000 |
|                              | 502300005                               | ,000             | ,000 |
|                              | 502300006                               | ,000             | ,000 |
|                              | 502300007                               | ,000             | ,000 |
|                              | 502300214                               | ,000             | ,000 |
|                              | 502300411                               | ,000             | ,000 |
|                              | 502300415                               | ,000             | ,000 |
|                              | 502300416                               | ,000             | ,000 |
|                              | 502300811                               | ,000             | ,000 |
|                              | 502300913                               | ,000             | ,000 |
| weekday veckodag             | 1 måndag                                |                  |      |
|                              | 2 tisdag                                |                  |      |
|                              | 3 onsdag                                |                  |      |
|                              | 4 torsdag                               |                  |      |
|                              | 5 fredag                                |                  |      |
|                              | 6 lördag                                |                  |      |
|                              | 7 söndag                                |                  |      |
| season säsong/period         | 1 januari-mars                          |                  |      |
|                              | 2 april-maj                             |                  |      |
|                              | 3 juni-augusti                          |                  |      |
|                              | 4 september-oktober                     |                  |      |
|                              | 5 november-december                     |                  |      |
| sv3 tredjedelar för standard | 1 andra tredjedelen                     |                  |      |
|                              | 2 första tredjedelen                    |                  |      |
|                              | 3 tredje tredjedelen                    |                  |      |
| holiday större helg          | 1 ingen större helg                     |                  |      |
|                              | 2 större helg (påsk/midsommar/julonyår) |                  |      |

## Categorical Variables Codings

|                              |                                         | Parameter coding |      |
|------------------------------|-----------------------------------------|------------------|------|
|                              |                                         | (10)             | (11) |
|                              | 404060001                               | ,000             | ,000 |
|                              | 404060002                               | ,000             | ,000 |
|                              | 404310003                               | ,000             | ,000 |
|                              | 404310004                               | ,000             | ,000 |
|                              | 502300005                               | ,000             | ,000 |
|                              | 502300006                               | ,000             | ,000 |
|                              | 502300007                               | ,000             | ,000 |
|                              | 502300214                               | ,000             | ,000 |
|                              | 502300411                               | ,000             | ,000 |
|                              | 502300415                               | ,000             | ,000 |
|                              | 502300416                               | ,000             | ,000 |
|                              | 502300811                               | ,000             | ,000 |
|                              | 502300913                               | ,000             | ,000 |
| weekday veckodag             | 1 måndag                                |                  |      |
|                              | 2 tisdag                                |                  |      |
|                              | 3 onsdag                                |                  |      |
|                              | 4 torsdag                               |                  |      |
|                              | 5 fredag                                |                  |      |
|                              | 6 lördag                                |                  |      |
|                              | 7 söndag                                |                  |      |
| season säsong/period         | 1 januari-mars                          |                  |      |
|                              | 2 april-maj                             |                  |      |
|                              | 3 juni-augusti                          |                  |      |
|                              | 4 september-oktober                     |                  |      |
|                              | 5 november-december                     |                  |      |
| sv3 tredjedelar för standard | 1 andra tredjedelen                     |                  |      |
|                              | 2 första tredjedelen                    |                  |      |
|                              | 3 tredje tredjedelen                    |                  |      |
| holiday större helg          | 1 ingen större helg                     |                  |      |
|                              | 2 större helg (påsk/midsommar/julonyår) |                  |      |

## Categorical Variables Codings

|                              |                                         | Parameter coding |      |
|------------------------------|-----------------------------------------|------------------|------|
|                              |                                         | (12)             | (13) |
|                              | 404060001                               | ,000             | ,000 |
|                              | 404060002                               | ,000             | ,000 |
|                              | 404310003                               | ,000             | ,000 |
|                              | 404310004                               | ,000             | ,000 |
|                              | 502300005                               | ,000             | ,000 |
|                              | 502300006                               | ,000             | ,000 |
|                              | 502300007                               | ,000             | ,000 |
|                              | 502300214                               | ,000             | ,000 |
|                              | 502300411                               | ,000             | ,000 |
|                              | 502300415                               | ,000             | ,000 |
|                              | 502300416                               | ,000             | ,000 |
|                              | 502300811                               | ,000             | ,000 |
|                              | 502300913                               | ,000             | ,000 |
| weekday veckodag             | 1 måndag                                |                  |      |
|                              | 2 tisdag                                |                  |      |
|                              | 3 onsdag                                |                  |      |
|                              | 4 torsdag                               |                  |      |
|                              | 5 fredag                                |                  |      |
|                              | 6 lördag                                |                  |      |
|                              | 7 söndag                                |                  |      |
| season säsong/period         | 1 januari-mars                          |                  |      |
|                              | 2 april-maj                             |                  |      |
|                              | 3 juni-augusti                          |                  |      |
|                              | 4 september-oktober                     |                  |      |
|                              | 5 november-december                     |                  |      |
| sv3 tredjedelar för standard | 1 andra tredjedelen                     |                  |      |
|                              | 2 första tredjedelen                    |                  |      |
|                              | 3 tredje tredjedelen                    |                  |      |
| holiday större helg          | 1 ingen större helg                     |                  |      |
|                              | 2 större helg (påsk/midsommar/julonyår) |                  |      |

## Categorical Variables Codings

|                              |                                         | Parameter coding |      |
|------------------------------|-----------------------------------------|------------------|------|
|                              |                                         | (14)             | (15) |
|                              | 404060001                               | ,000             | ,000 |
|                              | 404060002                               | ,000             | ,000 |
|                              | 404310003                               | ,000             | ,000 |
|                              | 404310004                               | ,000             | ,000 |
|                              | 502300005                               | ,000             | ,000 |
|                              | 502300006                               | ,000             | ,000 |
|                              | 502300007                               | ,000             | ,000 |
|                              | 502300214                               | ,000             | ,000 |
|                              | 502300411                               | ,000             | ,000 |
|                              | 502300415                               | ,000             | ,000 |
|                              | 502300416                               | ,000             | ,000 |
|                              | 502300811                               | ,000             | ,000 |
|                              | 502300913                               | ,000             | ,000 |
| weekday veckodag             | 1 måndag                                |                  |      |
|                              | 2 tisdag                                |                  |      |
|                              | 3 onsdag                                |                  |      |
|                              | 4 torsdag                               |                  |      |
|                              | 5 fredag                                |                  |      |
|                              | 6 lördag                                |                  |      |
|                              | 7 söndag                                |                  |      |
| season säsong/period         | 1 januari-mars                          |                  |      |
|                              | 2 april-maj                             |                  |      |
|                              | 3 juni-augusti                          |                  |      |
|                              | 4 september-oktober                     |                  |      |
|                              | 5 november-december                     |                  |      |
| sv3 tredjedelar för standard | 1 andra tredjedelen                     |                  |      |
|                              | 2 första tredjedelen                    |                  |      |
|                              | 3 tredje tredjedelen                    |                  |      |
| holiday större helg          | 1 ingen större helg                     |                  |      |
|                              | 2 större helg (påsk/midsommar/julonyår) |                  |      |

## Categorical Variables Codings

|                              |                                         | Parameter coding |      |
|------------------------------|-----------------------------------------|------------------|------|
|                              |                                         | (16)             | (17) |
|                              | 404060001                               | ,000             | ,000 |
|                              | 404060002                               | ,000             | ,000 |
|                              | 404310003                               | ,000             | ,000 |
|                              | 404310004                               | ,000             | ,000 |
|                              | 502300005                               | ,000             | ,000 |
|                              | 502300006                               | ,000             | ,000 |
|                              | 502300007                               | ,000             | ,000 |
|                              | 502300214                               | ,000             | ,000 |
|                              | 502300411                               | ,000             | ,000 |
|                              | 502300415                               | ,000             | ,000 |
|                              | 502300416                               | ,000             | ,000 |
|                              | 502300811                               | ,000             | ,000 |
|                              | 502300913                               | ,000             | ,000 |
| weekday veckodag             | 1 måndag                                |                  |      |
|                              | 2 tisdag                                |                  |      |
|                              | 3 onsdag                                |                  |      |
|                              | 4 torsdag                               |                  |      |
|                              | 5 fredag                                |                  |      |
|                              | 6 lördag                                |                  |      |
|                              | 7 söndag                                |                  |      |
| season säsong/period         | 1 januari-mars                          |                  |      |
|                              | 2 april-maj                             |                  |      |
|                              | 3 juni-augusti                          |                  |      |
|                              | 4 september-oktober                     |                  |      |
|                              | 5 november-december                     |                  |      |
| sv3 tredjedelar för standard | 1 andra tredjedelen                     |                  |      |
|                              | 2 första tredjedelen                    |                  |      |
|                              | 3 tredje tredjedelen                    |                  |      |
| holiday större helg          | 1 ingen större helg                     |                  |      |
|                              | 2 större helg (påsk/midsommar/julonyår) |                  |      |

## Categorical Variables Codings

|                              |                                         | Parameter coding |      |
|------------------------------|-----------------------------------------|------------------|------|
|                              |                                         | (18)             | (19) |
|                              | 404060001                               | ,000             | ,000 |
|                              | 404060002                               | ,000             | ,000 |
|                              | 404310003                               | ,000             | ,000 |
|                              | 404310004                               | ,000             | ,000 |
|                              | 502300005                               | ,000             | ,000 |
|                              | 502300006                               | ,000             | ,000 |
|                              | 502300007                               | ,000             | ,000 |
|                              | 502300214                               | ,000             | ,000 |
|                              | 502300411                               | ,000             | ,000 |
|                              | 502300415                               | ,000             | ,000 |
|                              | 502300416                               | ,000             | ,000 |
|                              | 502300811                               | ,000             | ,000 |
|                              | 502300913                               | ,000             | ,000 |
| weekday veckodag             | 1 måndag                                |                  |      |
|                              | 2 tisdag                                |                  |      |
|                              | 3 onsdag                                |                  |      |
|                              | 4 torsdag                               |                  |      |
|                              | 5 fredag                                |                  |      |
|                              | 6 lördag                                |                  |      |
|                              | 7 söndag                                |                  |      |
| season säsong/period         | 1 januari-mars                          |                  |      |
|                              | 2 april-maj                             |                  |      |
|                              | 3 juni-augusti                          |                  |      |
|                              | 4 september-oktober                     |                  |      |
|                              | 5 november-december                     |                  |      |
| sv3 tredjedelar för standard | 1 andra tredjedelen                     |                  |      |
|                              | 2 första tredjedelen                    |                  |      |
|                              | 3 tredje tredjedelen                    |                  |      |
| holiday större helg          | 1 ingen större helg                     |                  |      |
|                              | 2 större helg (påsk/midsommar/julonyår) |                  |      |



## Categorical Variables Codings

|                              |                                         | Parameter coding |      |
|------------------------------|-----------------------------------------|------------------|------|
|                              |                                         | (20)             | (21) |
|                              | 404060001                               | ,000             | ,000 |
|                              | 404060002                               | ,000             | ,000 |
|                              | 404310003                               | ,000             | ,000 |
|                              | 404310004                               | ,000             | ,000 |
|                              | 502300005                               | ,000             | ,000 |
|                              | 502300006                               | ,000             | ,000 |
|                              | 502300007                               | ,000             | ,000 |
|                              | 502300214                               | ,000             | ,000 |
|                              | 502300411                               | ,000             | ,000 |
|                              | 502300415                               | ,000             | ,000 |
|                              | 502300416                               | ,000             | ,000 |
|                              | 502300811                               | ,000             | ,000 |
|                              | 502300913                               | ,000             | ,000 |
| weekday veckodag             | 1 måndag                                |                  |      |
|                              | 2 tisdag                                |                  |      |
|                              | 3 onsdag                                |                  |      |
|                              | 4 torsdag                               |                  |      |
|                              | 5 fredag                                |                  |      |
|                              | 6 lördag                                |                  |      |
|                              | 7 söndag                                |                  |      |
| season säsong/period         | 1 januari-mars                          |                  |      |
|                              | 2 april-maj                             |                  |      |
|                              | 3 juni-augusti                          |                  |      |
|                              | 4 september-oktober                     |                  |      |
|                              | 5 november-december                     |                  |      |
| sv3 tredjedelar för standard | 1 andra tredjedelen                     |                  |      |
|                              | 2 första tredjedelen                    |                  |      |
|                              | 3 tredje tredjedelen                    |                  |      |
| holiday större helg          | 1 ingen större helg                     |                  |      |
|                              | 2 större helg (påsk/midsommar/julonyår) |                  |      |

## Categorical Variables Codings

|                              |                                         | Parameter coding |       |
|------------------------------|-----------------------------------------|------------------|-------|
|                              |                                         | (22)             | (23)  |
|                              | 404060001                               | ,000             | 1,000 |
|                              | 404060002                               | ,000             | ,000  |
|                              | 404310003                               | ,000             | ,000  |
|                              | 404310004                               | ,000             | ,000  |
|                              | 502300005                               | ,000             | ,000  |
|                              | 502300006                               | ,000             | ,000  |
|                              | 502300007                               | ,000             | ,000  |
|                              | 502300214                               | ,000             | ,000  |
|                              | 502300411                               | ,000             | ,000  |
|                              | 502300415                               | ,000             | ,000  |
|                              | 502300416                               | ,000             | ,000  |
|                              | 502300811                               | ,000             | ,000  |
|                              | 502300913                               | ,000             | ,000  |
| weekday veckodag             | 1 måndag                                |                  |       |
|                              | 2 tisdag                                |                  |       |
|                              | 3 onsdag                                |                  |       |
|                              | 4 torsdag                               |                  |       |
|                              | 5 fredag                                |                  |       |
|                              | 6 lördag                                |                  |       |
|                              | 7 söndag                                |                  |       |
| season säsong/period         | 1 januari-mars                          |                  |       |
|                              | 2 april-maj                             |                  |       |
|                              | 3 juni-augusti                          |                  |       |
|                              | 4 september-oktober                     |                  |       |
|                              | 5 november-december                     |                  |       |
| sv3 tredjedelar för standard | 1 andra tredjedelen                     |                  |       |
|                              | 2 första tredjedelen                    |                  |       |
|                              | 3 tredje tredjedelen                    |                  |       |
| holiday större helg          | 1 ingen större helg                     |                  |       |
|                              | 2 större helg (påsk/midsommar/julonyår) |                  |       |

## Categorical Variables Codings

|                              |                                         | Parameter coding |       |
|------------------------------|-----------------------------------------|------------------|-------|
|                              |                                         | (24)             | (25)  |
|                              | 404060001                               | ,000             | ,000  |
|                              | 404060002                               | 1,000            | ,000  |
|                              | 404310003                               | ,000             | 1,000 |
|                              | 404310004                               | ,000             | ,000  |
|                              | 502300005                               | ,000             | ,000  |
|                              | 502300006                               | ,000             | ,000  |
|                              | 502300007                               | ,000             | ,000  |
|                              | 502300214                               | ,000             | ,000  |
|                              | 502300411                               | ,000             | ,000  |
|                              | 502300415                               | ,000             | ,000  |
|                              | 502300416                               | ,000             | ,000  |
|                              | 502300811                               | ,000             | ,000  |
|                              | 502300913                               | ,000             | ,000  |
| weekday veckodag             | 1 måndag                                |                  |       |
|                              | 2 tisdag                                |                  |       |
|                              | 3 onsdag                                |                  |       |
|                              | 4 torsdag                               |                  |       |
|                              | 5 fredag                                |                  |       |
|                              | 6 lördag                                |                  |       |
|                              | 7 söndag                                |                  |       |
| season säsong/period         | 1 januari-mars                          |                  |       |
|                              | 2 april-maj                             |                  |       |
|                              | 3 juni-augusti                          |                  |       |
|                              | 4 september-oktober                     |                  |       |
|                              | 5 november-december                     |                  |       |
| sv3 tredjedelar för standard | 1 andra tredjedelen                     |                  |       |
|                              | 2 första tredjedelen                    |                  |       |
|                              | 3 tredje tredjedelen                    |                  |       |
| holiday större helg          | 1 ingen större helg                     |                  |       |
|                              | 2 större helg (påsk/midsommar/julonyår) |                  |       |

## Categorical Variables Codings

|                              |                                         | Parameter coding |       |
|------------------------------|-----------------------------------------|------------------|-------|
|                              |                                         | (26)             | (27)  |
|                              | 404060001                               | ,000             | ,000  |
|                              | 404060002                               | ,000             | ,000  |
|                              | 404310003                               | ,000             | ,000  |
|                              | 404310004                               | 1,000            | ,000  |
|                              | 502300005                               | ,000             | 1,000 |
|                              | 502300006                               | ,000             | ,000  |
|                              | 502300007                               | ,000             | ,000  |
|                              | 502300214                               | ,000             | ,000  |
|                              | 502300411                               | ,000             | ,000  |
|                              | 502300415                               | ,000             | ,000  |
|                              | 502300416                               | ,000             | ,000  |
|                              | 502300811                               | ,000             | ,000  |
|                              | 502300913                               | ,000             | ,000  |
| weekday veckodag             | 1 måndag                                |                  |       |
|                              | 2 tisdag                                |                  |       |
|                              | 3 onsdag                                |                  |       |
|                              | 4 torsdag                               |                  |       |
|                              | 5 fredag                                |                  |       |
|                              | 6 lördag                                |                  |       |
|                              | 7 söndag                                |                  |       |
| season säsong/period         | 1 januari-mars                          |                  |       |
|                              | 2 april-maj                             |                  |       |
|                              | 3 juni-augusti                          |                  |       |
|                              | 4 september-oktober                     |                  |       |
|                              | 5 november-december                     |                  |       |
| sv3 tredjedelar för standard | 1 andra tredjedelen                     |                  |       |
|                              | 2 första tredjedelen                    |                  |       |
|                              | 3 tredje tredjedelen                    |                  |       |
| holiday större helg          | 1 ingen större helg                     |                  |       |
|                              | 2 större helg (påsk/midsommar/julonyår) |                  |       |

## Categorical Variables Codings

|                              |                                         | Parameter coding |       |
|------------------------------|-----------------------------------------|------------------|-------|
|                              |                                         | (28)             | (29)  |
|                              | 404060001                               | ,000             | ,000  |
|                              | 404060002                               | ,000             | ,000  |
|                              | 404310003                               | ,000             | ,000  |
|                              | 404310004                               | ,000             | ,000  |
|                              | 502300005                               | ,000             | ,000  |
|                              | 502300006                               | 1,000            | ,000  |
|                              | 502300007                               | ,000             | 1,000 |
|                              | 502300214                               | ,000             | ,000  |
|                              | 502300411                               | ,000             | ,000  |
|                              | 502300415                               | ,000             | ,000  |
|                              | 502300416                               | ,000             | ,000  |
|                              | 502300811                               | ,000             | ,000  |
|                              | 502300913                               | ,000             | ,000  |
| weekday veckodag             | 1 måndag                                |                  |       |
|                              | 2 tisdag                                |                  |       |
|                              | 3 onsdag                                |                  |       |
|                              | 4 torsdag                               |                  |       |
|                              | 5 fredag                                |                  |       |
|                              | 6 lördag                                |                  |       |
|                              | 7 söndag                                |                  |       |
| season säsong/period         | 1 januari-mars                          |                  |       |
|                              | 2 april-maj                             |                  |       |
|                              | 3 juni-augusti                          |                  |       |
|                              | 4 september-oktober                     |                  |       |
|                              | 5 november-december                     |                  |       |
| sv3 tredjedelar för standard | 1 andra tredjedelen                     |                  |       |
|                              | 2 första tredjedelen                    |                  |       |
|                              | 3 tredje tredjedelen                    |                  |       |
| holiday större helg          | 1 ingen större helg                     |                  |       |
|                              | 2 större helg (påsk/midsommar/julonyår) |                  |       |

## Categorical Variables Codings

|                              |                                         | Parameter coding |       |
|------------------------------|-----------------------------------------|------------------|-------|
|                              |                                         | (30)             | (31)  |
|                              | 404060001                               | ,000             | ,000  |
|                              | 404060002                               | ,000             | ,000  |
|                              | 404310003                               | ,000             | ,000  |
|                              | 404310004                               | ,000             | ,000  |
|                              | 502300005                               | ,000             | ,000  |
|                              | 502300006                               | ,000             | ,000  |
|                              | 502300007                               | ,000             | ,000  |
|                              | 502300214                               | 1,000            | ,000  |
|                              | 502300411                               | ,000             | 1,000 |
|                              | 502300415                               | ,000             | ,000  |
|                              | 502300416                               | ,000             | ,000  |
|                              | 502300811                               | ,000             | ,000  |
|                              | 502300913                               | ,000             | ,000  |
| weekday veckodag             | 1 måndag                                |                  |       |
|                              | 2 tisdag                                |                  |       |
|                              | 3 onsdag                                |                  |       |
|                              | 4 torsdag                               |                  |       |
|                              | 5 fredag                                |                  |       |
|                              | 6 lördag                                |                  |       |
|                              | 7 söndag                                |                  |       |
| season säsong/period         | 1 januari-mars                          |                  |       |
|                              | 2 april-maj                             |                  |       |
|                              | 3 juni-augusti                          |                  |       |
|                              | 4 september-oktober                     |                  |       |
|                              | 5 november-december                     |                  |       |
| sv3 tredjedelar för standard | 1 andra tredjedelen                     |                  |       |
|                              | 2 första tredjedelen                    |                  |       |
|                              | 3 tredje tredjedelen                    |                  |       |
| holiday större helg          | 1 ingen större helg                     |                  |       |
|                              | 2 större helg (påsk/midsommar/julonyår) |                  |       |

## Categorical Variables Codings

|                              |                                         | Parameter coding |       |
|------------------------------|-----------------------------------------|------------------|-------|
|                              |                                         | (32)             | (33)  |
|                              | 404060001                               | ,000             | ,000  |
|                              | 404060002                               | ,000             | ,000  |
|                              | 404310003                               | ,000             | ,000  |
|                              | 404310004                               | ,000             | ,000  |
|                              | 502300005                               | ,000             | ,000  |
|                              | 502300006                               | ,000             | ,000  |
|                              | 502300007                               | ,000             | ,000  |
|                              | 502300214                               | ,000             | ,000  |
|                              | 502300411                               | ,000             | ,000  |
|                              | 502300415                               | 1,000            | ,000  |
|                              | 502300416                               | ,000             | 1,000 |
|                              | 502300811                               | ,000             | ,000  |
|                              | 502300913                               | ,000             | ,000  |
| weekday veckodag             | 1 måndag                                |                  |       |
|                              | 2 tisdag                                |                  |       |
|                              | 3 onsdag                                |                  |       |
|                              | 4 torsdag                               |                  |       |
|                              | 5 fredag                                |                  |       |
|                              | 6 lördag                                |                  |       |
|                              | 7 söndag                                |                  |       |
| season säsong/period         | 1 januari-mars                          |                  |       |
|                              | 2 april-maj                             |                  |       |
|                              | 3 juni-augusti                          |                  |       |
|                              | 4 september-oktober                     |                  |       |
|                              | 5 november-december                     |                  |       |
| sv3 tredjedelar för standard | 1 andra tredjedelen                     |                  |       |
|                              | 2 första tredjedelen                    |                  |       |
|                              | 3 tredje tredjedelen                    |                  |       |
| holiday större helg          | 1 ingen större helg                     |                  |       |
|                              | 2 större helg (påsk/midsommar/julonyår) |                  |       |

## Categorical Variables Codings

|                              |                                         | Parameter coding |       |
|------------------------------|-----------------------------------------|------------------|-------|
|                              |                                         | (34)             | (35)  |
|                              | 404060001                               | ,000             | ,000  |
|                              | 404060002                               | ,000             | ,000  |
|                              | 404310003                               | ,000             | ,000  |
|                              | 404310004                               | ,000             | ,000  |
|                              | 502300005                               | ,000             | ,000  |
|                              | 502300006                               | ,000             | ,000  |
|                              | 502300007                               | ,000             | ,000  |
|                              | 502300214                               | ,000             | ,000  |
|                              | 502300411                               | ,000             | ,000  |
|                              | 502300415                               | ,000             | ,000  |
|                              | 502300416                               | ,000             | ,000  |
|                              | 502300811                               | 1,000            | ,000  |
|                              | 502300913                               | ,000             | 1,000 |
| weekday veckodag             | 1 måndag                                |                  |       |
|                              | 2 tisdag                                |                  |       |
|                              | 3 onsdag                                |                  |       |
|                              | 4 torsdag                               |                  |       |
|                              | 5 fredag                                |                  |       |
|                              | 6 lördag                                |                  |       |
|                              | 7 söndag                                |                  |       |
| season säsong/period         | 1 januari-mars                          |                  |       |
|                              | 2 april-maj                             |                  |       |
|                              | 3 juni-augusti                          |                  |       |
|                              | 4 september-oktober                     |                  |       |
|                              | 5 november-december                     |                  |       |
| sv3 tredjedelar för standard | 1 andra tredjedelen                     |                  |       |
|                              | 2 första tredjedelen                    |                  |       |
|                              | 3 tredje tredjedelen                    |                  |       |
| holiday större helg          | 1 ingen större helg                     |                  |       |
|                              | 2 större helg (påsk/midsommar/julonyår) |                  |       |

**Block 0: Beginning Block**



Classification Table<sup>a,b</sup>

| Observed           |                             |                      | Predicted                   |                      |
|--------------------|-----------------------------|----------------------|-----------------------------|----------------------|
|                    |                             |                      | dod01 dödsfall ja eller nej |                      |
|                    |                             |                      | 0 inget dödsfall            | 1 minst ett dödsfall |
| Step 0             | dod01 dödsfall ja eller nej | 0 inget dödsfall     | 11839                       | 0                    |
|                    |                             | 1 minst ett dödsfall | 636                         | 0                    |
| Overall Percentage |                             |                      |                             |                      |

Classification Table<sup>a,b</sup>

| Observed           |                             |                      | Predicted          |
|--------------------|-----------------------------|----------------------|--------------------|
|                    |                             |                      | Percentage Correct |
| Step 0             | dod01 dödsfall ja eller nej | 0 inget dödsfall     | 100,0              |
|                    |                             | 1 minst ett dödsfall | ,0                 |
| Overall Percentage |                             |                      | 94,9               |

a. Constant is included in the model.

b. The cut value is ,500

Variables in the Equation

|                 | B      | S.E. | Wald     | df | Sig. | Exp(B) |
|-----------------|--------|------|----------|----|------|--------|
| Step 0 Constant | -2,924 | ,041 | 5160,279 | 1  | ,000 | ,054   |

## Variables not in the Equation

|        |           |            | Score   | df | Sig. |
|--------|-----------|------------|---------|----|------|
| Step 0 | Variables | sv3        | 61,737  | 2  | ,000 |
|        |           | sv3(1)     | 61,635  | 1  | ,000 |
|        |           | sv3(2)     | 19,457  | 1  | ,000 |
|        |           | VASTY2     | 635,545 | 35 | ,000 |
|        |           | VASTY2(1)  | 2,519   | 1  | ,113 |
|        |           | VASTY2(2)  | 6,299   | 1  | ,012 |
|        |           | VASTY2(3)  | 8,957   | 1  | ,003 |
|        |           | VASTY2(4)  | ,151    | 1  | ,698 |
|        |           | VASTY2(5)  | 7,537   | 1  | ,006 |
|        |           | VASTY2(6)  | 20,142  | 1  | ,000 |
|        |           | VASTY2(7)  | 127,387 | 1  | ,000 |
|        |           | VASTY2(8)  | 8,957   | 1  | ,003 |
|        |           | VASTY2(9)  | ,163    | 1  | ,687 |
|        |           | VASTY2(10) | 7,570   | 1  | ,006 |
|        |           | VASTY2(11) | ,113    | 1  | ,737 |
|        |           | VASTY2(12) | 47,021  | 1  | ,000 |
|        |           | VASTY2(13) | 90,515  | 1  | ,000 |
|        |           | VASTY2(14) | 7,570   | 1  | ,006 |
|        |           | VASTY2(15) | ,151    | 1  | ,698 |
|        |           | VASTY2(16) | 4,298   | 1  | ,038 |
|        |           | VASTY2(17) | 20,199  | 1  | ,000 |
|        |           | VASTY2(18) | 17,916  | 1  | ,000 |
|        |           | VASTY2(19) | 18,086  | 1  | ,000 |
|        |           | VASTY2(20) | 10,563  | 1  | ,001 |
|        |           | VASTY2(21) | 1,696   | 1  | ,193 |
|        |           | VASTY2(22) | 26,693  | 1  | ,000 |
|        |           | VASTY2(23) | 1,125   | 1  | ,289 |
|        |           | VASTY2(24) | 72,662  | 1  | ,000 |
|        |           | VASTY2(25) | 2,477   | 1  | ,116 |
|        |           | VASTY2(26) | 16,006  | 1  | ,000 |
|        |           | VASTY2(27) | 20,256  | 1  | ,000 |
|        |           | VASTY2(28) | 12,309  | 1  | ,000 |
|        |           | VASTY2(29) | 20,256  | 1  | ,000 |
|        |           | VASTY2(30) | 1,263   | 1  | ,261 |
|        |           | VASTY2(31) | 20,256  | 1  | ,000 |
|        |           | VASTY2(32) | 15,810  | 1  | ,000 |
|        |           | VASTY2(33) | 17,973  | 1  | ,000 |
|        |           | VASTY2(34) | ,693    | 1  | ,405 |
|        |           | VASTY2(35) | 17,360  | 1  | ,000 |
|        |           | weekday    | 2,920   | 6  | ,819 |
|        |           | weekday(1) | ,422    | 1  | ,516 |
|        |           | weekday(2) | ,103    | 1  | ,749 |
|        |           | weekday(3) | ,575    | 1  | ,448 |

## Variables not in the Equation

|                    | Score   | df | Sig. |
|--------------------|---------|----|------|
| weekday(4)         | ,109    | 1  | ,741 |
| weekday(5)         | ,165    | 1  | ,685 |
| weekday(6)         | 1,908   | 1  | ,167 |
| holiday(1)         | ,270    | 1  | ,603 |
| season             | 9,040   | 4  | ,060 |
| season(1)          | ,504    | 1  | ,478 |
| season(2)          | 2,866   | 1  | ,090 |
| season(3)          | ,328    | 1  | ,567 |
| season(4)          | 7,145   | 1  | ,008 |
| Overall Statistics | 655,728 | 48 | ,000 |

## Block 1: Method = Enter

## Omnibus Tests of Model Coefficients

|             | Chi-square | df | Sig. |
|-------------|------------|----|------|
| Step 1 Step | 723,060    | 48 | ,000 |
| Block       | 723,060    | 48 | ,000 |
| Model       | 723,060    | 48 | ,000 |

## Model Summary

| Step | -2 Log likelihood     | Cox & Snell R Square | Nagelkerke R Square |
|------|-----------------------|----------------------|---------------------|
| 1    | 4301,782 <sup>a</sup> | ,056                 | ,170                |

a. Estimation terminated at iteration number 20 because maximum iterations has been reached. Final solution cannot be found.

Classification Table<sup>a</sup>

|                    |                      | Predicted                   |                  |
|--------------------|----------------------|-----------------------------|------------------|
|                    |                      | dod01 dödsfall ja eller nej | 0 inget dödsfall |
| Observed           | 0 inget dödsfall     | 11839                       | 0                |
|                    | 1 minst ett dödsfall | 636                         | 0                |
| Overall Percentage |                      |                             |                  |

Classification Table<sup>a</sup>

|                    |                      | Predicted        |                      |
|--------------------|----------------------|------------------|----------------------|
|                    |                      | 0 inget dödsfall | 1 minst ett dödsfall |
| Observed           | 0 inget dödsfall     | 100,0            | ,0                   |
|                    | 1 minst ett dödsfall |                  |                      |
| Overall Percentage |                      | 94,9             |                      |

a. The cut value is ,500

## Variables in the Equation

|                         | B       | S.E.     | Wald    | df | Sig. | Exp(B) |
|-------------------------|---------|----------|---------|----|------|--------|
| Step 1 <sup>a</sup> sv3 |         |          | 6,934   | 2  | ,031 |        |
| sv3(1)                  | -,156   | ,117     | 1,769   | 1  | ,184 | ,856   |
| sv3(2)                  | ,184    | ,111     | 2,731   | 1  | ,098 | 1,202  |
| VASTY2                  |         |          | 219,392 | 35 | ,000 |        |
| VASTY2(1)               | ,570    | ,344     | 2,754   | 1  | ,097 | 1,769  |
| VASTY2(2)               | ,653    | ,338     | 3,725   | 1  | ,054 | 1,921  |
| VASTY2(3)               | ,885    | ,332     | 7,124   | 1  | ,008 | 2,423  |
| VASTY2(4)               | ,232    | ,369     | ,393    | 1  | ,531 | 1,261  |
| VASTY2(5)               | -,669   | ,496     | 1,823   | 1  | ,177 | ,512   |
| VASTY2(6)               | -18,130 | 2102,608 | ,000    | 1  | ,993 | ,000   |
| VASTY2(7)               | 1,740   | ,306     | 32,412  | 1  | ,000 | 5,700  |
| VASTY2(8)               | ,913    | ,332     | 7,550   | 1  | ,006 | 2,492  |
| VASTY2(9)               | ,397    | ,361     | 1,212   | 1  | ,271 | 1,488  |
| VASTY2(10)              | ,665    | ,338     | 3,871   | 1  | ,049 | 1,945  |
| VASTY2(11)              | ,381    | ,357     | 1,140   | 1  | ,286 | 1,464  |
| VASTY2(12)              | 1,191   | ,318     | 14,016  | 1  | ,000 | 3,292  |
| VASTY2(13)              | 1,403   | ,315     | 19,868  | 1  | ,000 | 4,068  |
| VASTY2(14)              | ,722    | ,335     | 4,639   | 1  | ,031 | 2,058  |
| VASTY2(15)              | ,076    | ,373     | ,042    | 1  | ,838 | 1,079  |
| VASTY2(16)              | -,895   | ,644     | 1,928   | 1  | ,165 | ,409   |
| VASTY2(17)              | -17,933 | 2097,697 | ,000    | 1  | ,993 | ,000   |
| VASTY2(18)              | -2,506  | 1,041    | 5,796   | 1  | ,016 | ,082   |
| VASTY2(19)              | -2,513  | 1,041    | 5,825   | 1  | ,016 | ,081   |
| VASTY2(20)              | -1,453  | ,642     | 5,116   | 1  | ,024 | ,234   |
| VASTY2(21)              | ,617    | ,346     | 3,191   | 1  | ,074 | 1,854  |
| VASTY2(22)              | 1,126   | ,320     | 12,354  | 1  | ,000 | 3,082  |
| VASTY2(23)              | ,540    | ,348     | 2,406   | 1  | ,121 | 1,716  |
| VASTY2(24)              | 1,407   | ,311     | 20,476  | 1  | ,000 | 4,085  |
| VASTY2(25)              | -,166   | ,436     | ,146    | 1  | ,703 | ,847   |
| VASTY2(26)              | -18,008 | 2350,172 | ,000    | 1  | ,994 | ,000   |
| VASTY2(27)              | -18,089 | 2096,319 | ,000    | 1  | ,993 | ,000   |
| VASTY2(28)              | -18,119 | 2675,663 | ,000    | 1  | ,995 | ,000   |
| VASTY2(29)              | -18,165 | 2098,433 | ,000    | 1  | ,993 | ,000   |
| VASTY2(30)              | ,060    | ,387     | ,024    | 1  | ,877 | 1,062  |
| VASTY2(31)              | -17,843 | 2098,197 | ,000    | 1  | ,993 | ,000   |
| VASTY2(32)              | -1,813  | ,764     | 5,625   | 1  | ,018 | ,163   |
| VASTY2(33)              | -2,519  | 1,041    | 5,854   | 1  | ,016 | ,081   |
| VASTY2(34)              | ,474    | ,351     | 1,827   | 1  | ,176 | 1,606  |
| VASTY2(35)              | -18,012 | 2257,675 | ,000    | 1  | ,994 | ,000   |
| weekday                 |         |          | 3,391   | 6  | ,758 |        |

## Variables in the Equation

|                     |            | 95% C.I. for EXP(B) |        |
|---------------------|------------|---------------------|--------|
|                     |            | Lower               | Upper  |
| Step 1 <sup>a</sup> | sv3        |                     |        |
|                     | sv3(1)     | ,680                | 1,077  |
|                     | sv3(2)     | ,966                | 1,494  |
|                     | VASTY2     |                     |        |
|                     | VASTY2(1)  | ,902                | 3,470  |
|                     | VASTY2(2)  | ,990                | 3,727  |
|                     | VASTY2(3)  | 1,265               | 4,642  |
|                     | VASTY2(4)  | ,611                | 2,600  |
|                     | VASTY2(5)  | ,194                | 1,353  |
|                     | VASTY2(6)  | ,000                | .      |
|                     | VASTY2(7)  | 3,131               | 10,378 |
|                     | VASTY2(8)  | 1,299               | 4,780  |
|                     | VASTY2(9)  | ,733                | 3,018  |
|                     | VASTY2(10) | 1,003               | 3,774  |
|                     | VASTY2(11) | ,727                | 2,947  |
|                     | VASTY2(12) | 1,764               | 6,142  |
|                     | VASTY2(13) | 2,195               | 7,539  |
|                     | VASTY2(14) | 1,067               | 3,968  |
|                     | VASTY2(15) | ,520                | 2,241  |
|                     | VASTY2(16) | ,116                | 1,445  |
|                     | VASTY2(17) | ,000                | .      |
|                     | VASTY2(18) | ,011                | ,628   |
|                     | VASTY2(19) | ,011                | ,624   |
|                     | VASTY2(20) | ,066                | ,824   |
|                     | VASTY2(21) | ,942                | 3,651  |
|                     | VASTY2(22) | 1,645               | 5,775  |
|                     | VASTY2(23) | ,867                | 3,393  |
|                     | VASTY2(24) | 2,221               | 7,516  |
|                     | VASTY2(25) | ,360                | 1,990  |
|                     | VASTY2(26) | ,000                | .      |
|                     | VASTY2(27) | ,000                | .      |
|                     | VASTY2(28) | ,000                | .      |
|                     | VASTY2(29) | ,000                | .      |
|                     | VASTY2(30) | ,497                | 2,267  |
|                     | VASTY2(31) | ,000                | .      |
|                     | VASTY2(32) | ,036                | ,730   |
|                     | VASTY2(33) | ,010                | ,620   |
|                     | VASTY2(34) | ,808                | 3,194  |
|                     | VASTY2(35) | ,000                | .      |
|                     | weekday    |                     |        |

Variables in the Equation

|            | B      | S.E. | Wald    | df | Sig. | Exp(B) |
|------------|--------|------|---------|----|------|--------|
| weekday(1) | ,021   | ,152 | ,020    | 1  | ,888 | 1,022  |
| weekday(2) | -,071  | ,156 | ,205    | 1  | ,651 | ,932   |
| weekday(3) | ,045   | ,153 | ,085    | 1  | ,770 | 1,046  |
| weekday(4) | ,025   | ,154 | ,027    | 1  | ,870 | 1,026  |
| weekday(5) | -,074  | ,158 | ,220    | 1  | ,639 | ,929   |
| weekday(6) | -,202  | ,161 | 1,561   | 1  | ,212 | ,817   |
| holiday(1) | -,258  | ,256 | 1,016   | 1  | ,313 | ,772   |
| season     |        |      | 6,798   | 4  | ,147 |        |
| season(1)  | ,025   | ,129 | ,038    | 1  | ,846 | 1,025  |
| season(2)  | ,045   | ,118 | ,142    | 1  | ,706 | 1,046  |
| season(3)  | -,079  | ,132 | ,352    | 1  | ,553 | ,924   |
| season(4)  | -,300  | ,142 | 4,435   | 1  | ,035 | ,741   |
| Constant   | -3,144 | ,304 | 107,049 | 1  | ,000 | ,043   |

Variables in the Equation

|            | 95% C.I. for EXP(B) |       |
|------------|---------------------|-------|
|            | Lower               | Upper |
| weekday(1) | ,758                | 1,377 |
| weekday(2) | ,686                | 1,265 |
| weekday(3) | ,775                | 1,410 |
| weekday(4) | ,758                | 1,388 |
| weekday(5) | ,681                | 1,266 |
| weekday(6) | ,596                | 1,122 |
| holiday(1) | ,468                | 1,276 |
| season     |                     |       |
| season(1)  | ,797                | 1,319 |
| season(2)  | ,830                | 1,318 |
| season(3)  | ,713                | 1,198 |
| season(4)  | ,561                | ,979  |
| Constant   |                     |       |

a. Variable(s) entered on step 1: sv3, VASTY2, weekday, holiday, season.

LOGISTIC REGRESSION VARIABLES dod01

/METHOD=ENTER sv5 VASTY2 weekday holiday season

/CONTRAST (sv5)=Indicator(1)

/CONTRAST (VASTY2)=Indicator(1)

/CONTRAST (weekday)=Indicator(1)

/CONTRAST (holiday)=Indicator(1)

/CONTRAST (season)=Indicator(1)

/PRINT=CI(95)

/CRITERIA=PIN(0.05) POUT(0.10) ITERATE(20) CUT(0.5).

## Logistic Regression

[DataSet6] C:\cWordjan\Rafaela\_VCS\alla\_tillsammans\abo\_bjo\_vasa\_v1.sav

### Case Processing Summary

| Unweighted Cases <sup>a</sup> |                      | N     | Percent |
|-------------------------------|----------------------|-------|---------|
| Selected Cases                | Included in Analysis | 12475 | 100,0   |
|                               | Missing Cases        | 0     | ,0      |
|                               | Total                | 12475 | 100,0   |
| Unselected Cases              |                      | 0     | ,0      |
| Total                         |                      | 12475 | 100,0   |

a. If weight is in effect, see classification table for the total number of cases.

### Dependent Variable Encoding

| Original Value       | Internal Value |
|----------------------|----------------|
| 0 inget dödsfall     | 0              |
| 1 minst ett dödsfall | 1              |

### Categorical Variables Codings

|                                     | Frequency | Parameter |
|-------------------------------------|-----------|-----------|
|                                     |           | (1)       |
| VASTY2 (SAIR*10000)+VASTY 403073101 | 365       | ,000      |
| 403073102                           | 362       | 1,000     |
| 403073103                           | 365       | ,000      |
| 403073202                           | 365       | ,000      |
| 403073203                           | 365       | ,000      |
| 403073204                           | 330       | ,000      |
| 403073303                           | 364       | ,000      |
| 403073651                           | 362       | ,000      |
| 403073771                           | 365       | ,000      |
| 403133102                           | 341       | ,000      |
| 403133106                           | 365       | ,000      |
| 403133107                           | 365       | ,000      |
| 403133109                           | 365       | ,000      |
| 403133202                           | 365       | ,000      |
| 403133203                           | 365       | ,000      |
| 403133204                           | 365       | ,000      |
| 403133315                           | 177       | ,000      |
| 403133322                           | 365       | ,000      |
| 403133401                           | 362       | ,000      |
| 403133402                           | 365       | ,000      |
| 403133550                           | 298       | ,000      |
| 403133772                           | 365       | ,000      |
| 403135803                           | 365       | ,000      |

## Categorical Variables Codings

|                           |           | Parameter coding |       |
|---------------------------|-----------|------------------|-------|
|                           |           | (2)              | (3)   |
| VASTY2 (SAIR*10000)+VASTY | 403073101 | ,000             | ,000  |
|                           | 403073102 | ,000             | ,000  |
|                           | 403073103 | 1,000            | ,000  |
|                           | 403073202 | ,000             | 1,000 |
|                           | 403073203 | ,000             | ,000  |
|                           | 403073204 | ,000             | ,000  |
|                           | 403073303 | ,000             | ,000  |
|                           | 403073651 | ,000             | ,000  |
|                           | 403073771 | ,000             | ,000  |
|                           | 403133102 | ,000             | ,000  |
|                           | 403133106 | ,000             | ,000  |
|                           | 403133107 | ,000             | ,000  |
|                           | 403133109 | ,000             | ,000  |
|                           | 403133202 | ,000             | ,000  |
|                           | 403133203 | ,000             | ,000  |
|                           | 403133204 | ,000             | ,000  |
|                           | 403133315 | ,000             | ,000  |
|                           | 403133322 | ,000             | ,000  |
|                           | 403133401 | ,000             | ,000  |
|                           | 403133402 | ,000             | ,000  |
|                           | 403133550 | ,000             | ,000  |
|                           | 403133772 | ,000             | ,000  |
|                           | 403135803 | ,000             | ,000  |



**Categorical Variables Codings**

|                           |           | Parameter coding |       |
|---------------------------|-----------|------------------|-------|
|                           |           | (4)              | (5)   |
| VASTY2 (SAIR*10000)+VASTY | 403073101 | ,000             | ,000  |
|                           | 403073102 | ,000             | ,000  |
|                           | 403073103 | ,000             | ,000  |
|                           | 403073202 | ,000             | ,000  |
|                           | 403073203 | 1,000            | ,000  |
|                           | 403073204 | ,000             | 1,000 |
|                           | 403073303 | ,000             | ,000  |
|                           | 403073651 | ,000             | ,000  |
|                           | 403073771 | ,000             | ,000  |
|                           | 403133102 | ,000             | ,000  |
|                           | 403133106 | ,000             | ,000  |
|                           | 403133107 | ,000             | ,000  |
|                           | 403133109 | ,000             | ,000  |
|                           | 403133202 | ,000             | ,000  |
|                           | 403133203 | ,000             | ,000  |
|                           | 403133204 | ,000             | ,000  |
|                           | 403133315 | ,000             | ,000  |
|                           | 403133322 | ,000             | ,000  |
|                           | 403133401 | ,000             | ,000  |
|                           | 403133402 | ,000             | ,000  |
|                           | 403133550 | ,000             | ,000  |
|                           | 403133772 | ,000             | ,000  |
|                           | 403135803 | ,000             | ,000  |

Peer Review Only

## Categorical Variables Codings

|                           |           | Parameter coding |       |
|---------------------------|-----------|------------------|-------|
|                           |           | (6)              | (7)   |
| VASTY2 (SAIR*10000)+VASTY | 403073101 | ,000             | ,000  |
|                           | 403073102 | ,000             | ,000  |
|                           | 403073103 | ,000             | ,000  |
|                           | 403073202 | ,000             | ,000  |
|                           | 403073203 | ,000             | ,000  |
|                           | 403073204 | ,000             | ,000  |
|                           | 403073303 | 1,000            | ,000  |
|                           | 403073651 | ,000             | 1,000 |
|                           | 403073771 | ,000             | ,000  |
|                           | 403133102 | ,000             | ,000  |
|                           | 403133106 | ,000             | ,000  |
|                           | 403133107 | ,000             | ,000  |
|                           | 403133109 | ,000             | ,000  |
|                           | 403133202 | ,000             | ,000  |
|                           | 403133203 | ,000             | ,000  |
|                           | 403133204 | ,000             | ,000  |
|                           | 403133315 | ,000             | ,000  |
|                           | 403133322 | ,000             | ,000  |
|                           | 403133401 | ,000             | ,000  |
|                           | 403133402 | ,000             | ,000  |
|                           | 403133550 | ,000             | ,000  |
|                           | 403133772 | ,000             | ,000  |
|                           | 403135803 | ,000             | ,000  |

**Categorical Variables Codings**

|                           |           | Parameter coding |       |
|---------------------------|-----------|------------------|-------|
|                           |           | (8)              | (9)   |
| VASTY2 (SAIR*10000)+VASTY | 403073101 | ,000             | ,000  |
|                           | 403073102 | ,000             | ,000  |
|                           | 403073103 | ,000             | ,000  |
|                           | 403073202 | ,000             | ,000  |
|                           | 403073203 | ,000             | ,000  |
|                           | 403073204 | ,000             | ,000  |
|                           | 403073303 | ,000             | ,000  |
|                           | 403073651 | ,000             | ,000  |
|                           | 403073771 | 1,000            | ,000  |
|                           | 403133102 | ,000             | 1,000 |
|                           | 403133106 | ,000             | ,000  |
|                           | 403133107 | ,000             | ,000  |
|                           | 403133109 | ,000             | ,000  |
|                           | 403133202 | ,000             | ,000  |
|                           | 403133203 | ,000             | ,000  |
|                           | 403133204 | ,000             | ,000  |
|                           | 403133315 | ,000             | ,000  |
|                           | 403133322 | ,000             | ,000  |
|                           | 403133401 | ,000             | ,000  |
|                           | 403133402 | ,000             | ,000  |
|                           | 403133550 | ,000             | ,000  |
|                           | 403133772 | ,000             | ,000  |
|                           | 403135803 | ,000             | ,000  |

Peer Review Only

## Categorical Variables Codings

|                           |           | Parameter coding |       |
|---------------------------|-----------|------------------|-------|
|                           |           | (10)             | (11)  |
| VASTY2 (SAIR*10000)+VASTY | 403073101 | ,000             | ,000  |
|                           | 403073102 | ,000             | ,000  |
|                           | 403073103 | ,000             | ,000  |
|                           | 403073202 | ,000             | ,000  |
|                           | 403073203 | ,000             | ,000  |
|                           | 403073204 | ,000             | ,000  |
|                           | 403073303 | ,000             | ,000  |
|                           | 403073651 | ,000             | ,000  |
|                           | 403073771 | ,000             | ,000  |
|                           | 403133102 | ,000             | ,000  |
|                           | 403133106 | 1,000            | ,000  |
|                           | 403133107 | ,000             | 1,000 |
|                           | 403133109 | ,000             | ,000  |
|                           | 403133202 | ,000             | ,000  |
|                           | 403133203 | ,000             | ,000  |
|                           | 403133204 | ,000             | ,000  |
|                           | 403133315 | ,000             | ,000  |
|                           | 403133322 | ,000             | ,000  |
|                           | 403133401 | ,000             | ,000  |
|                           | 403133402 | ,000             | ,000  |
|                           | 403133550 | ,000             | ,000  |
|                           | 403133772 | ,000             | ,000  |
|                           | 403135803 | ,000             | ,000  |

## Categorical Variables Codings

|                           |           | Parameter coding |       |
|---------------------------|-----------|------------------|-------|
|                           |           | (12)             | (13)  |
| VASTY2 (SAIR*10000)+VASTY | 403073101 | ,000             | ,000  |
|                           | 403073102 | ,000             | ,000  |
|                           | 403073103 | ,000             | ,000  |
|                           | 403073202 | ,000             | ,000  |
|                           | 403073203 | ,000             | ,000  |
|                           | 403073204 | ,000             | ,000  |
|                           | 403073303 | ,000             | ,000  |
|                           | 403073651 | ,000             | ,000  |
|                           | 403073771 | ,000             | ,000  |
|                           | 403133102 | ,000             | ,000  |
|                           | 403133106 | ,000             | ,000  |
|                           | 403133107 | ,000             | ,000  |
|                           | 403133109 | 1,000            | ,000  |
|                           | 403133202 | ,000             | 1,000 |
|                           | 403133203 | ,000             | ,000  |
|                           | 403133204 | ,000             | ,000  |
|                           | 403133315 | ,000             | ,000  |
|                           | 403133322 | ,000             | ,000  |
|                           | 403133401 | ,000             | ,000  |
|                           | 403133402 | ,000             | ,000  |
|                           | 403133550 | ,000             | ,000  |
|                           | 403133772 | ,000             | ,000  |
|                           | 403135803 | ,000             | ,000  |

## Categorical Variables Codings

|                           |           | Parameter coding |       |
|---------------------------|-----------|------------------|-------|
|                           |           | (14)             | (15)  |
| VASTY2 (SAIR*10000)+VASTY | 403073101 | ,000             | ,000  |
|                           | 403073102 | ,000             | ,000  |
|                           | 403073103 | ,000             | ,000  |
|                           | 403073202 | ,000             | ,000  |
|                           | 403073203 | ,000             | ,000  |
|                           | 403073204 | ,000             | ,000  |
|                           | 403073303 | ,000             | ,000  |
|                           | 403073651 | ,000             | ,000  |
|                           | 403073771 | ,000             | ,000  |
|                           | 403133102 | ,000             | ,000  |
|                           | 403133106 | ,000             | ,000  |
|                           | 403133107 | ,000             | ,000  |
|                           | 403133109 | ,000             | ,000  |
|                           | 403133202 | ,000             | ,000  |
|                           | 403133203 | 1,000            | ,000  |
|                           | 403133204 | ,000             | 1,000 |
|                           | 403133315 | ,000             | ,000  |
|                           | 403133322 | ,000             | ,000  |
|                           | 403133401 | ,000             | ,000  |
|                           | 403133402 | ,000             | ,000  |
|                           | 403133550 | ,000             | ,000  |
|                           | 403133772 | ,000             | ,000  |
|                           | 403135803 | ,000             | ,000  |

## Categorical Variables Codings

|                           |           | Parameter coding |       |
|---------------------------|-----------|------------------|-------|
|                           |           | (16)             | (17)  |
| VASTY2 (SAIR*10000)+VASTY | 403073101 | ,000             | ,000  |
|                           | 403073102 | ,000             | ,000  |
|                           | 403073103 | ,000             | ,000  |
|                           | 403073202 | ,000             | ,000  |
|                           | 403073203 | ,000             | ,000  |
|                           | 403073204 | ,000             | ,000  |
|                           | 403073303 | ,000             | ,000  |
|                           | 403073651 | ,000             | ,000  |
|                           | 403073771 | ,000             | ,000  |
|                           | 403133102 | ,000             | ,000  |
|                           | 403133106 | ,000             | ,000  |
|                           | 403133107 | ,000             | ,000  |
|                           | 403133109 | ,000             | ,000  |
|                           | 403133202 | ,000             | ,000  |
|                           | 403133203 | ,000             | ,000  |
|                           | 403133204 | ,000             | ,000  |
|                           | 403133315 | 1,000            | ,000  |
|                           | 403133322 | ,000             | 1,000 |
|                           | 403133401 | ,000             | ,000  |
|                           | 403133402 | ,000             | ,000  |
|                           | 403133550 | ,000             | ,000  |
|                           | 403133772 | ,000             | ,000  |
|                           | 403135803 | ,000             | ,000  |

## Categorical Variables Codings

|                           |           | Parameter coding |       |
|---------------------------|-----------|------------------|-------|
|                           |           | (18)             | (19)  |
| VASTY2 (SAIR*10000)+VASTY | 403073101 | ,000             | ,000  |
|                           | 403073102 | ,000             | ,000  |
|                           | 403073103 | ,000             | ,000  |
|                           | 403073202 | ,000             | ,000  |
|                           | 403073203 | ,000             | ,000  |
|                           | 403073204 | ,000             | ,000  |
|                           | 403073303 | ,000             | ,000  |
|                           | 403073651 | ,000             | ,000  |
|                           | 403073771 | ,000             | ,000  |
|                           | 403133102 | ,000             | ,000  |
|                           | 403133106 | ,000             | ,000  |
|                           | 403133107 | ,000             | ,000  |
|                           | 403133109 | ,000             | ,000  |
|                           | 403133202 | ,000             | ,000  |
|                           | 403133203 | ,000             | ,000  |
|                           | 403133204 | ,000             | ,000  |
|                           | 403133315 | ,000             | ,000  |
|                           | 403133322 | ,000             | ,000  |
|                           | 403133401 | 1,000            | ,000  |
|                           | 403133402 | ,000             | 1,000 |
|                           | 403133550 | ,000             | ,000  |
|                           | 403133772 | ,000             | ,000  |
|                           | 403135803 | ,000             | ,000  |



**Categorical Variables Codings**

|                           |           | Parameter coding |       |
|---------------------------|-----------|------------------|-------|
|                           |           | (20)             | (21)  |
| VASTY2 (SAIR*10000)+VASTY | 403073101 | ,000             | ,000  |
|                           | 403073102 | ,000             | ,000  |
|                           | 403073103 | ,000             | ,000  |
|                           | 403073202 | ,000             | ,000  |
|                           | 403073203 | ,000             | ,000  |
|                           | 403073204 | ,000             | ,000  |
|                           | 403073303 | ,000             | ,000  |
|                           | 403073651 | ,000             | ,000  |
|                           | 403073771 | ,000             | ,000  |
|                           | 403133102 | ,000             | ,000  |
|                           | 403133106 | ,000             | ,000  |
|                           | 403133107 | ,000             | ,000  |
|                           | 403133109 | ,000             | ,000  |
|                           | 403133202 | ,000             | ,000  |
|                           | 403133203 | ,000             | ,000  |
|                           | 403133204 | ,000             | ,000  |
|                           | 403133315 | ,000             | ,000  |
|                           | 403133322 | ,000             | ,000  |
|                           | 403133401 | ,000             | ,000  |
|                           | 403133402 | ,000             | ,000  |
|                           | 403133550 | 1,000            | ,000  |
|                           | 403133772 | ,000             | 1,000 |
|                           | 403135803 | ,000             | ,000  |

Peer Review Only

## Categorical Variables Codings

|                           |           | Parameter coding |      |
|---------------------------|-----------|------------------|------|
|                           |           | (22)             | (23) |
| VASTY2 (SAIR*10000)+VASTY | 403073101 | ,000             | ,000 |
|                           | 403073102 | ,000             | ,000 |
|                           | 403073103 | ,000             | ,000 |
|                           | 403073202 | ,000             | ,000 |
|                           | 403073203 | ,000             | ,000 |
|                           | 403073204 | ,000             | ,000 |
|                           | 403073303 | ,000             | ,000 |
|                           | 403073651 | ,000             | ,000 |
|                           | 403073771 | ,000             | ,000 |
|                           | 403133102 | ,000             | ,000 |
|                           | 403133106 | ,000             | ,000 |
|                           | 403133107 | ,000             | ,000 |
|                           | 403133109 | ,000             | ,000 |
|                           | 403133202 | ,000             | ,000 |
|                           | 403133203 | ,000             | ,000 |
|                           | 403133204 | ,000             | ,000 |
|                           | 403133315 | ,000             | ,000 |
|                           | 403133322 | ,000             | ,000 |
|                           | 403133401 | ,000             | ,000 |
|                           | 403133402 | ,000             | ,000 |
|                           | 403133550 | ,000             | ,000 |
|                           | 403133772 | ,000             | ,000 |
|                           | 403135803 | 1,000            | ,000 |

## Categorical Variables Codings

|                           |           | Parameter coding |      |
|---------------------------|-----------|------------------|------|
|                           |           | (24)             | (25) |
| VASTY2 (SAIR*10000)+VASTY | 403073101 | ,000             | ,000 |
|                           | 403073102 | ,000             | ,000 |
|                           | 403073103 | ,000             | ,000 |
|                           | 403073202 | ,000             | ,000 |
|                           | 403073203 | ,000             | ,000 |
|                           | 403073204 | ,000             | ,000 |
|                           | 403073303 | ,000             | ,000 |
|                           | 403073651 | ,000             | ,000 |
|                           | 403073771 | ,000             | ,000 |
|                           | 403133102 | ,000             | ,000 |
|                           | 403133106 | ,000             | ,000 |
|                           | 403133107 | ,000             | ,000 |
|                           | 403133109 | ,000             | ,000 |
|                           | 403133202 | ,000             | ,000 |
|                           | 403133203 | ,000             | ,000 |
|                           | 403133204 | ,000             | ,000 |
|                           | 403133315 | ,000             | ,000 |
|                           | 403133322 | ,000             | ,000 |
|                           | 403133401 | ,000             | ,000 |
|                           | 403133402 | ,000             | ,000 |
|                           | 403133550 | ,000             | ,000 |
|                           | 403133772 | ,000             | ,000 |
|                           | 403135803 | ,000             | ,000 |

## Categorical Variables Codings

|                           |           | Parameter coding |      |
|---------------------------|-----------|------------------|------|
|                           |           | (26)             | (27) |
| VASTY2 (SAIR*10000)+VASTY | 403073101 | ,000             | ,000 |
|                           | 403073102 | ,000             | ,000 |
|                           | 403073103 | ,000             | ,000 |
|                           | 403073202 | ,000             | ,000 |
|                           | 403073203 | ,000             | ,000 |
|                           | 403073204 | ,000             | ,000 |
|                           | 403073303 | ,000             | ,000 |
|                           | 403073651 | ,000             | ,000 |
|                           | 403073771 | ,000             | ,000 |
|                           | 403133102 | ,000             | ,000 |
|                           | 403133106 | ,000             | ,000 |
|                           | 403133107 | ,000             | ,000 |
|                           | 403133109 | ,000             | ,000 |
|                           | 403133202 | ,000             | ,000 |
|                           | 403133203 | ,000             | ,000 |
|                           | 403133204 | ,000             | ,000 |
|                           | 403133315 | ,000             | ,000 |
|                           | 403133322 | ,000             | ,000 |
|                           | 403133401 | ,000             | ,000 |
|                           | 403133402 | ,000             | ,000 |
|                           | 403133550 | ,000             | ,000 |
|                           | 403133772 | ,000             | ,000 |
|                           | 403135803 | ,000             | ,000 |

1  
2  
3  
4  
5  
6  
7  
8  
9  
10  
11  
12  
13  
14  
15  
16  
17  
18  
19  
20  
21  
22  
23  
24  
25  
26  
27  
28  
29  
30  
31  
32  
33  
34  
35  
36  
37  
38  
39  
40  
41  
42  
43  
44  
45  
46  
47  
48  
49  
50  
51  
52  
53  
54  
55  
56  
57  
58  
59  
60

**Categorical Variables Codings**

|                           |           | Parameter coding |      |
|---------------------------|-----------|------------------|------|
|                           |           | (28)             | (29) |
| VASTY2 (SAIR*10000)+VASTY | 403073101 | ,000             | ,000 |
|                           | 403073102 | ,000             | ,000 |
|                           | 403073103 | ,000             | ,000 |
|                           | 403073202 | ,000             | ,000 |
|                           | 403073203 | ,000             | ,000 |
|                           | 403073204 | ,000             | ,000 |
|                           | 403073303 | ,000             | ,000 |
|                           | 403073651 | ,000             | ,000 |
|                           | 403073771 | ,000             | ,000 |
|                           | 403133102 | ,000             | ,000 |
|                           | 403133106 | ,000             | ,000 |
|                           | 403133107 | ,000             | ,000 |
|                           | 403133109 | ,000             | ,000 |
|                           | 403133202 | ,000             | ,000 |
|                           | 403133203 | ,000             | ,000 |
|                           | 403133204 | ,000             | ,000 |
|                           | 403133315 | ,000             | ,000 |
|                           | 403133322 | ,000             | ,000 |
|                           | 403133401 | ,000             | ,000 |
|                           | 403133402 | ,000             | ,000 |
|                           | 403133550 | ,000             | ,000 |
|                           | 403133772 | ,000             | ,000 |
|                           | 403135803 | ,000             | ,000 |

Peer review only

## Categorical Variables Codings

|                           |           | Parameter coding |      |
|---------------------------|-----------|------------------|------|
|                           |           | (30)             | (31) |
| VASTY2 (SAIR*10000)+VASTY | 403073101 | ,000             | ,000 |
|                           | 403073102 | ,000             | ,000 |
|                           | 403073103 | ,000             | ,000 |
|                           | 403073202 | ,000             | ,000 |
|                           | 403073203 | ,000             | ,000 |
|                           | 403073204 | ,000             | ,000 |
|                           | 403073303 | ,000             | ,000 |
|                           | 403073651 | ,000             | ,000 |
|                           | 403073771 | ,000             | ,000 |
|                           | 403133102 | ,000             | ,000 |
|                           | 403133106 | ,000             | ,000 |
|                           | 403133107 | ,000             | ,000 |
|                           | 403133109 | ,000             | ,000 |
|                           | 403133202 | ,000             | ,000 |
|                           | 403133203 | ,000             | ,000 |
|                           | 403133204 | ,000             | ,000 |
|                           | 403133315 | ,000             | ,000 |
|                           | 403133322 | ,000             | ,000 |
|                           | 403133401 | ,000             | ,000 |
|                           | 403133402 | ,000             | ,000 |
|                           | 403133550 | ,000             | ,000 |
|                           | 403133772 | ,000             | ,000 |
|                           | 403135803 | ,000             | ,000 |

**Categorical Variables Codings**

|                           |           | Parameter coding |      |
|---------------------------|-----------|------------------|------|
|                           |           | (32)             | (33) |
| VASTY2 (SAIR*10000)+VASTY | 403073101 | ,000             | ,000 |
|                           | 403073102 | ,000             | ,000 |
|                           | 403073103 | ,000             | ,000 |
|                           | 403073202 | ,000             | ,000 |
|                           | 403073203 | ,000             | ,000 |
|                           | 403073204 | ,000             | ,000 |
|                           | 403073303 | ,000             | ,000 |
|                           | 403073651 | ,000             | ,000 |
|                           | 403073771 | ,000             | ,000 |
|                           | 403133102 | ,000             | ,000 |
|                           | 403133106 | ,000             | ,000 |
|                           | 403133107 | ,000             | ,000 |
|                           | 403133109 | ,000             | ,000 |
|                           | 403133202 | ,000             | ,000 |
|                           | 403133203 | ,000             | ,000 |
|                           | 403133204 | ,000             | ,000 |
|                           | 403133315 | ,000             | ,000 |
|                           | 403133322 | ,000             | ,000 |
|                           | 403133401 | ,000             | ,000 |
|                           | 403133402 | ,000             | ,000 |
|                           | 403133550 | ,000             | ,000 |
|                           | 403133772 | ,000             | ,000 |
|                           | 403135803 | ,000             | ,000 |

Peer Review Only

## Categorical Variables Codings

|    |                                     | Parameter coding |      |
|----|-------------------------------------|------------------|------|
|    |                                     | (34)             | (35) |
| 8  | VASTY2 (SAIR*10000)+VASTY 403073101 | ,000             | ,000 |
| 9  | 403073102                           | ,000             | ,000 |
| 10 | 403073103                           | ,000             | ,000 |
| 11 | 403073202                           | ,000             | ,000 |
| 12 | 403073203                           | ,000             | ,000 |
| 13 | 403073204                           | ,000             | ,000 |
| 14 | 403073303                           | ,000             | ,000 |
| 15 | 403073651                           | ,000             | ,000 |
| 16 | 403073771                           | ,000             | ,000 |
| 17 | 403133102                           | ,000             | ,000 |
| 18 | 403133106                           | ,000             | ,000 |
| 19 | 403133107                           | ,000             | ,000 |
| 20 | 403133109                           | ,000             | ,000 |
| 21 | 403133202                           | ,000             | ,000 |
| 22 | 403133203                           | ,000             | ,000 |
| 23 | 403133204                           | ,000             | ,000 |
| 24 | 403133315                           | ,000             | ,000 |
| 25 | 403133322                           | ,000             | ,000 |
| 26 | 403133401                           | ,000             | ,000 |
| 27 | 403133402                           | ,000             | ,000 |
| 28 | 403133550                           | ,000             | ,000 |
| 29 | 403133772                           | ,000             | ,000 |
| 30 | 403135803                           | ,000             | ,000 |



## Categorical Variables Codings

|                            |                                         | Frequency | Parameter<br>(1) |
|----------------------------|-----------------------------------------|-----------|------------------|
|                            | 404060001                               | 365       | ,000             |
|                            | 404060002                               | 366       | ,000             |
|                            | 404310003                               | 291       | ,000             |
|                            | 404310004                               | 291       | ,000             |
|                            | 502300005                               | 366       | ,000             |
|                            | 502300006                               | 225       | ,000             |
|                            | 502300007                               | 366       | ,000             |
|                            | 502300214                               | 366       | ,000             |
|                            | 502300411                               | 366       | ,000             |
|                            | 502300415                               | 360       | ,000             |
|                            | 502300416                               | 363       | ,000             |
|                            | 502300811                               | 364       | ,000             |
|                            | 502300913                               | 315       | ,000             |
| weekday veckodag           | 1 måndag                                | 1805      | ,000             |
|                            | 2 tisdag                                | 1812      | 1,000            |
|                            | 3 onsdag                                | 1800      | ,000             |
|                            | 4 torsdag                               | 1794      | ,000             |
|                            | 5 fredag                                | 1788      | ,000             |
|                            | 6 lördag                                | 1735      | ,000             |
|                            | 7 söndag                                | 1741      | ,000             |
| season säsong/period       | 1 januari-mars                          | 3182      | ,000             |
|                            | 2 april-maj                             | 2127      | 1,000            |
|                            | 3 juni-augusti                          | 2911      | ,000             |
|                            | 4 september-oktober                     | 2144      | ,000             |
|                            | 5 november-december                     | 2111      | ,000             |
| sv5 kvintiler för standard | 1 tredje kvintilen                      | 1863      | ,000             |
|                            | 2 första kvintilen                      | 3570      | 1,000            |
|                            | 3 andra kvintilen                       | 1759      | ,000             |
|                            | 4 fjärde kvintilen                      | 2327      | ,000             |
|                            | 5 femte kvintilen                       | 2956      | ,000             |
| holiday större helg        | 1 ingen större helg                     | 12078     | ,000             |
|                            | 2 större helg (påsk/midsommar/julonyår) | 397       | 1,000            |

## Categorical Variables Codings

|                            |                                         | Parameter coding |       |
|----------------------------|-----------------------------------------|------------------|-------|
|                            |                                         | (2)              | (3)   |
|                            | 404060001                               | ,000             | ,000  |
|                            | 404060002                               | ,000             | ,000  |
|                            | 404310003                               | ,000             | ,000  |
|                            | 404310004                               | ,000             | ,000  |
|                            | 502300005                               | ,000             | ,000  |
|                            | 502300006                               | ,000             | ,000  |
|                            | 502300007                               | ,000             | ,000  |
|                            | 502300214                               | ,000             | ,000  |
|                            | 502300411                               | ,000             | ,000  |
|                            | 502300415                               | ,000             | ,000  |
|                            | 502300416                               | ,000             | ,000  |
|                            | 502300811                               | ,000             | ,000  |
|                            | 502300913                               | ,000             | ,000  |
| weekday veckodag           | 1 måndag                                | ,000             | ,000  |
|                            | 2 tisdag                                | ,000             | ,000  |
|                            | 3 onsdag                                | 1,000            | ,000  |
|                            | 4 torsdag                               | ,000             | 1,000 |
|                            | 5 fredag                                | ,000             | ,000  |
|                            | 6 lördag                                | ,000             | ,000  |
|                            | 7 söndag                                | ,000             | ,000  |
| season säsong/period       | 1 januari-mars                          | ,000             | ,000  |
|                            | 2 april-maj                             | ,000             | ,000  |
|                            | 3 juni-augusti                          | 1,000            | ,000  |
|                            | 4 september-oktober                     | ,000             | 1,000 |
|                            | 5 november-december                     | ,000             | ,000  |
| sv5 kvintiler för standard | 1 tredje kvintilen                      | ,000             | ,000  |
|                            | 2 första kvintilen                      | ,000             | ,000  |
|                            | 3 andra kvintilen                       | 1,000            | ,000  |
|                            | 4 fjärde kvintilen                      | ,000             | 1,000 |
|                            | 5 femte kvintilen                       | ,000             | ,000  |
| holiday större helg        | 1 ingen större helg                     |                  |       |
|                            | 2 större helg (påsk/midsommar/julonyår) |                  |       |

## Categorical Variables Codings

|                            |                                         | Parameter coding |       |
|----------------------------|-----------------------------------------|------------------|-------|
|                            |                                         | (4)              | (5)   |
|                            | 404060001                               | ,000             | ,000  |
|                            | 404060002                               | ,000             | ,000  |
|                            | 404310003                               | ,000             | ,000  |
|                            | 404310004                               | ,000             | ,000  |
|                            | 502300005                               | ,000             | ,000  |
|                            | 502300006                               | ,000             | ,000  |
|                            | 502300007                               | ,000             | ,000  |
|                            | 502300214                               | ,000             | ,000  |
|                            | 502300411                               | ,000             | ,000  |
|                            | 502300415                               | ,000             | ,000  |
|                            | 502300416                               | ,000             | ,000  |
|                            | 502300811                               | ,000             | ,000  |
|                            | 502300913                               | ,000             | ,000  |
| weekday veckodag           | 1 måndag                                | ,000             | ,000  |
|                            | 2 tisdag                                | ,000             | ,000  |
|                            | 3 onsdag                                | ,000             | ,000  |
|                            | 4 torsdag                               | ,000             | ,000  |
|                            | 5 fredag                                | 1,000            | ,000  |
|                            | 6 lördag                                | ,000             | 1,000 |
|                            | 7 söndag                                | ,000             | ,000  |
| season säsong/period       | 1 januari-mars                          | ,000             |       |
|                            | 2 april-maj                             | ,000             |       |
|                            | 3 juni-augusti                          | ,000             |       |
|                            | 4 september-oktober                     | ,000             |       |
|                            | 5 november-december                     | 1,000            |       |
| sv5 kvintiler för standard | 1 tredje kvintilen                      | ,000             |       |
|                            | 2 första kvintilen                      | ,000             |       |
|                            | 3 andra kvintilen                       | ,000             |       |
|                            | 4 fjärde kvintilen                      | ,000             |       |
|                            | 5 femte kvintilen                       | 1,000            |       |
| holiday större helg        | 1 ingen större helg                     |                  |       |
|                            | 2 större helg (påsk/midsommar/julonyår) |                  |       |

## Categorical Variables Codings

|                            |                                         | Parameter coding |      |
|----------------------------|-----------------------------------------|------------------|------|
|                            |                                         | (6)              | (7)  |
|                            | 404060001                               | ,000             | ,000 |
|                            | 404060002                               | ,000             | ,000 |
|                            | 404310003                               | ,000             | ,000 |
|                            | 404310004                               | ,000             | ,000 |
|                            | 502300005                               | ,000             | ,000 |
|                            | 502300006                               | ,000             | ,000 |
|                            | 502300007                               | ,000             | ,000 |
|                            | 502300214                               | ,000             | ,000 |
|                            | 502300411                               | ,000             | ,000 |
|                            | 502300415                               | ,000             | ,000 |
|                            | 502300416                               | ,000             | ,000 |
|                            | 502300811                               | ,000             | ,000 |
|                            | 502300913                               | ,000             | ,000 |
| weekday veckodag           | 1 måndag                                | ,000             |      |
|                            | 2 tisdag                                | ,000             |      |
|                            | 3 onsdag                                | ,000             |      |
|                            | 4 torsdag                               | ,000             |      |
|                            | 5 fredag                                | ,000             |      |
|                            | 6 lördag                                | ,000             |      |
|                            | 7 söndag                                | 1,000            |      |
| season säsong/period       | 1 januari-mars                          |                  |      |
|                            | 2 april-maj                             |                  |      |
|                            | 3 juni-augusti                          |                  |      |
|                            | 4 september-oktober                     |                  |      |
|                            | 5 november-december                     |                  |      |
| sv5 kvintiler för standard | 1 tredje kvintilen                      |                  |      |
|                            | 2 första kvintilen                      |                  |      |
|                            | 3 andra kvintilen                       |                  |      |
|                            | 4 fjärde kvintilen                      |                  |      |
|                            | 5 femte kvintilen                       |                  |      |
| holiday större helg        | 1 ingen större helg                     |                  |      |
|                            | 2 större helg (påsk/midsommar/julonyår) |                  |      |

## Categorical Variables Codings

|                            |                                         | Parameter coding |      |
|----------------------------|-----------------------------------------|------------------|------|
|                            |                                         | (8)              | (9)  |
|                            | 404060001                               | ,000             | ,000 |
|                            | 404060002                               | ,000             | ,000 |
|                            | 404310003                               | ,000             | ,000 |
|                            | 404310004                               | ,000             | ,000 |
|                            | 502300005                               | ,000             | ,000 |
|                            | 502300006                               | ,000             | ,000 |
|                            | 502300007                               | ,000             | ,000 |
|                            | 502300214                               | ,000             | ,000 |
|                            | 502300411                               | ,000             | ,000 |
|                            | 502300415                               | ,000             | ,000 |
|                            | 502300416                               | ,000             | ,000 |
|                            | 502300811                               | ,000             | ,000 |
|                            | 502300913                               | ,000             | ,000 |
| weekday veckodag           | 1 måndag                                |                  |      |
|                            | 2 tisdag                                |                  |      |
|                            | 3 onsdag                                |                  |      |
|                            | 4 torsdag                               |                  |      |
|                            | 5 fredag                                |                  |      |
|                            | 6 lördag                                |                  |      |
|                            | 7 söndag                                |                  |      |
| season säsong/period       | 1 januari-mars                          |                  |      |
|                            | 2 april-maj                             |                  |      |
|                            | 3 juni-augusti                          |                  |      |
|                            | 4 september-oktober                     |                  |      |
|                            | 5 november-december                     |                  |      |
| sv5 kvintiler för standard | 1 tredje kvintilen                      |                  |      |
|                            | 2 första kvintilen                      |                  |      |
|                            | 3 andra kvintilen                       |                  |      |
|                            | 4 fjärde kvintilen                      |                  |      |
|                            | 5 femte kvintilen                       |                  |      |
| holiday större helg        | 1 ingen större helg                     |                  |      |
|                            | 2 större helg (påsk/midsommar/julonyår) |                  |      |

## Categorical Variables Codings

|                            |                                         | Parameter coding |      |
|----------------------------|-----------------------------------------|------------------|------|
|                            |                                         | (10)             | (11) |
|                            | 404060001                               | ,000             | ,000 |
|                            | 404060002                               | ,000             | ,000 |
|                            | 404310003                               | ,000             | ,000 |
|                            | 404310004                               | ,000             | ,000 |
|                            | 502300005                               | ,000             | ,000 |
|                            | 502300006                               | ,000             | ,000 |
|                            | 502300007                               | ,000             | ,000 |
|                            | 502300214                               | ,000             | ,000 |
|                            | 502300411                               | ,000             | ,000 |
|                            | 502300415                               | ,000             | ,000 |
|                            | 502300416                               | ,000             | ,000 |
|                            | 502300811                               | ,000             | ,000 |
|                            | 502300913                               | ,000             | ,000 |
| weekday veckodag           | 1 måndag                                |                  |      |
|                            | 2 tisdag                                |                  |      |
|                            | 3 onsdag                                |                  |      |
|                            | 4 torsdag                               |                  |      |
|                            | 5 fredag                                |                  |      |
|                            | 6 lördag                                |                  |      |
|                            | 7 söndag                                |                  |      |
| season säsong/period       | 1 januari-mars                          |                  |      |
|                            | 2 april-maj                             |                  |      |
|                            | 3 juni-augusti                          |                  |      |
|                            | 4 september-oktober                     |                  |      |
|                            | 5 november-december                     |                  |      |
| sv5 kvintiler för standard | 1 tredje kvintilen                      |                  |      |
|                            | 2 första kvintilen                      |                  |      |
|                            | 3 andra kvintilen                       |                  |      |
|                            | 4 fjärde kvintilen                      |                  |      |
|                            | 5 femte kvintilen                       |                  |      |
| holiday större helg        | 1 ingen större helg                     |                  |      |
|                            | 2 större helg (påsk/midsommar/julonyår) |                  |      |

## Categorical Variables Codings

|                            |                                         | Parameter coding |      |
|----------------------------|-----------------------------------------|------------------|------|
|                            |                                         | (12)             | (13) |
|                            | 404060001                               | ,000             | ,000 |
|                            | 404060002                               | ,000             | ,000 |
|                            | 404310003                               | ,000             | ,000 |
|                            | 404310004                               | ,000             | ,000 |
|                            | 502300005                               | ,000             | ,000 |
|                            | 502300006                               | ,000             | ,000 |
|                            | 502300007                               | ,000             | ,000 |
|                            | 502300214                               | ,000             | ,000 |
|                            | 502300411                               | ,000             | ,000 |
|                            | 502300415                               | ,000             | ,000 |
|                            | 502300416                               | ,000             | ,000 |
|                            | 502300811                               | ,000             | ,000 |
|                            | 502300913                               | ,000             | ,000 |
| weekday veckodag           | 1 måndag                                |                  |      |
|                            | 2 tisdag                                |                  |      |
|                            | 3 onsdag                                |                  |      |
|                            | 4 torsdag                               |                  |      |
|                            | 5 fredag                                |                  |      |
|                            | 6 lördag                                |                  |      |
|                            | 7 söndag                                |                  |      |
| season säsong/period       | 1 januari-mars                          |                  |      |
|                            | 2 april-maj                             |                  |      |
|                            | 3 juni-augusti                          |                  |      |
|                            | 4 september-oktober                     |                  |      |
|                            | 5 november-december                     |                  |      |
| sv5 kvintiler för standard | 1 tredje kvintilen                      |                  |      |
|                            | 2 första kvintilen                      |                  |      |
|                            | 3 andra kvintilen                       |                  |      |
|                            | 4 fjärde kvintilen                      |                  |      |
|                            | 5 femte kvintilen                       |                  |      |
| holiday större helg        | 1 ingen större helg                     |                  |      |
|                            | 2 större helg (påsk/midsommar/julonyår) |                  |      |

## Categorical Variables Codings

|                            |                                         | Parameter coding |      |
|----------------------------|-----------------------------------------|------------------|------|
|                            |                                         | (14)             | (15) |
|                            | 404060001                               | ,000             | ,000 |
|                            | 404060002                               | ,000             | ,000 |
|                            | 404310003                               | ,000             | ,000 |
|                            | 404310004                               | ,000             | ,000 |
|                            | 502300005                               | ,000             | ,000 |
|                            | 502300006                               | ,000             | ,000 |
|                            | 502300007                               | ,000             | ,000 |
|                            | 502300214                               | ,000             | ,000 |
|                            | 502300411                               | ,000             | ,000 |
|                            | 502300415                               | ,000             | ,000 |
|                            | 502300416                               | ,000             | ,000 |
|                            | 502300811                               | ,000             | ,000 |
|                            | 502300913                               | ,000             | ,000 |
| weekday veckodag           | 1 måndag                                |                  |      |
|                            | 2 tisdag                                |                  |      |
|                            | 3 onsdag                                |                  |      |
|                            | 4 torsdag                               |                  |      |
|                            | 5 fredag                                |                  |      |
|                            | 6 lördag                                |                  |      |
|                            | 7 söndag                                |                  |      |
| season säsong/period       | 1 januari-mars                          |                  |      |
|                            | 2 april-maj                             |                  |      |
|                            | 3 juni-augusti                          |                  |      |
|                            | 4 september-oktober                     |                  |      |
|                            | 5 november-december                     |                  |      |
| sv5 kvintiler för standard | 1 tredje kvintilen                      |                  |      |
|                            | 2 första kvintilen                      |                  |      |
|                            | 3 andra kvintilen                       |                  |      |
|                            | 4 fjärde kvintilen                      |                  |      |
|                            | 5 femte kvintilen                       |                  |      |
| holiday större helg        | 1 ingen större helg                     |                  |      |
|                            | 2 större helg (påsk/midsommar/julonyår) |                  |      |



## Categorical Variables Codings

|                            |                                         | Parameter coding |      |
|----------------------------|-----------------------------------------|------------------|------|
|                            |                                         | (16)             | (17) |
|                            | 404060001                               | ,000             | ,000 |
|                            | 404060002                               | ,000             | ,000 |
|                            | 404310003                               | ,000             | ,000 |
|                            | 404310004                               | ,000             | ,000 |
|                            | 502300005                               | ,000             | ,000 |
|                            | 502300006                               | ,000             | ,000 |
|                            | 502300007                               | ,000             | ,000 |
|                            | 502300214                               | ,000             | ,000 |
|                            | 502300411                               | ,000             | ,000 |
|                            | 502300415                               | ,000             | ,000 |
|                            | 502300416                               | ,000             | ,000 |
|                            | 502300811                               | ,000             | ,000 |
|                            | 502300913                               | ,000             | ,000 |
| weekday veckodag           | 1 måndag                                |                  |      |
|                            | 2 tisdag                                |                  |      |
|                            | 3 onsdag                                |                  |      |
|                            | 4 torsdag                               |                  |      |
|                            | 5 fredag                                |                  |      |
|                            | 6 lördag                                |                  |      |
|                            | 7 söndag                                |                  |      |
| season säsong/period       | 1 januari-mars                          |                  |      |
|                            | 2 april-maj                             |                  |      |
|                            | 3 juni-augusti                          |                  |      |
|                            | 4 september-oktober                     |                  |      |
|                            | 5 november-december                     |                  |      |
| sv5 kvintiler för standard | 1 tredje kvintilen                      |                  |      |
|                            | 2 första kvintilen                      |                  |      |
|                            | 3 andra kvintilen                       |                  |      |
|                            | 4 fjärde kvintilen                      |                  |      |
|                            | 5 femte kvintilen                       |                  |      |
| holiday större helg        | 1 ingen större helg                     |                  |      |
|                            | 2 större helg (påsk/midsommar/julonyår) |                  |      |

## Categorical Variables Codings

|                            |                                         | Parameter coding |      |
|----------------------------|-----------------------------------------|------------------|------|
|                            |                                         | (18)             | (19) |
|                            | 404060001                               | ,000             | ,000 |
|                            | 404060002                               | ,000             | ,000 |
|                            | 404310003                               | ,000             | ,000 |
|                            | 404310004                               | ,000             | ,000 |
|                            | 502300005                               | ,000             | ,000 |
|                            | 502300006                               | ,000             | ,000 |
|                            | 502300007                               | ,000             | ,000 |
|                            | 502300214                               | ,000             | ,000 |
|                            | 502300411                               | ,000             | ,000 |
|                            | 502300415                               | ,000             | ,000 |
|                            | 502300416                               | ,000             | ,000 |
|                            | 502300811                               | ,000             | ,000 |
|                            | 502300913                               | ,000             | ,000 |
| weekday veckodag           | 1 måndag                                |                  |      |
|                            | 2 tisdag                                |                  |      |
|                            | 3 onsdag                                |                  |      |
|                            | 4 torsdag                               |                  |      |
|                            | 5 fredag                                |                  |      |
|                            | 6 lördag                                |                  |      |
|                            | 7 söndag                                |                  |      |
| season säsong/period       | 1 januari-mars                          |                  |      |
|                            | 2 april-maj                             |                  |      |
|                            | 3 juni-augusti                          |                  |      |
|                            | 4 september-oktober                     |                  |      |
|                            | 5 november-december                     |                  |      |
| sv5 kvintiler för standard | 1 tredje kvintilen                      |                  |      |
|                            | 2 första kvintilen                      |                  |      |
|                            | 3 andra kvintilen                       |                  |      |
|                            | 4 fjärde kvintilen                      |                  |      |
|                            | 5 femte kvintilen                       |                  |      |
| holiday större helg        | 1 ingen större helg                     |                  |      |
|                            | 2 större helg (påsk/midsommar/julonyår) |                  |      |

## Categorical Variables Codings

|                            |                                         | Parameter coding |      |
|----------------------------|-----------------------------------------|------------------|------|
|                            |                                         | (20)             | (21) |
|                            | 404060001                               | ,000             | ,000 |
|                            | 404060002                               | ,000             | ,000 |
|                            | 404310003                               | ,000             | ,000 |
|                            | 404310004                               | ,000             | ,000 |
|                            | 502300005                               | ,000             | ,000 |
|                            | 502300006                               | ,000             | ,000 |
|                            | 502300007                               | ,000             | ,000 |
|                            | 502300214                               | ,000             | ,000 |
|                            | 502300411                               | ,000             | ,000 |
|                            | 502300415                               | ,000             | ,000 |
|                            | 502300416                               | ,000             | ,000 |
|                            | 502300811                               | ,000             | ,000 |
|                            | 502300913                               | ,000             | ,000 |
| weekday veckodag           | 1 måndag                                |                  |      |
|                            | 2 tisdag                                |                  |      |
|                            | 3 onsdag                                |                  |      |
|                            | 4 torsdag                               |                  |      |
|                            | 5 fredag                                |                  |      |
|                            | 6 lördag                                |                  |      |
|                            | 7 söndag                                |                  |      |
| season säsong/period       | 1 januari-mars                          |                  |      |
|                            | 2 april-maj                             |                  |      |
|                            | 3 juni-augusti                          |                  |      |
|                            | 4 september-oktober                     |                  |      |
|                            | 5 november-december                     |                  |      |
| sv5 kvintiler för standard | 1 tredje kvintilen                      |                  |      |
|                            | 2 första kvintilen                      |                  |      |
|                            | 3 andra kvintilen                       |                  |      |
|                            | 4 fjärde kvintilen                      |                  |      |
|                            | 5 femte kvintilen                       |                  |      |
| holiday större helg        | 1 ingen större helg                     |                  |      |
|                            | 2 större helg (påsk/midsommar/julonyår) |                  |      |

## Categorical Variables Codings

|                            |                                         | Parameter coding |       |
|----------------------------|-----------------------------------------|------------------|-------|
|                            |                                         | (22)             | (23)  |
|                            | 404060001                               | ,000             | 1,000 |
|                            | 404060002                               | ,000             | ,000  |
|                            | 404310003                               | ,000             | ,000  |
|                            | 404310004                               | ,000             | ,000  |
|                            | 502300005                               | ,000             | ,000  |
|                            | 502300006                               | ,000             | ,000  |
|                            | 502300007                               | ,000             | ,000  |
|                            | 502300214                               | ,000             | ,000  |
|                            | 502300411                               | ,000             | ,000  |
|                            | 502300415                               | ,000             | ,000  |
|                            | 502300416                               | ,000             | ,000  |
|                            | 502300811                               | ,000             | ,000  |
|                            | 502300913                               | ,000             | ,000  |
| weekday veckodag           | 1 måndag                                |                  |       |
|                            | 2 tisdag                                |                  |       |
|                            | 3 onsdag                                |                  |       |
|                            | 4 torsdag                               |                  |       |
|                            | 5 fredag                                |                  |       |
|                            | 6 lördag                                |                  |       |
|                            | 7 söndag                                |                  |       |
| season säsong/period       | 1 januari-mars                          |                  |       |
|                            | 2 april-maj                             |                  |       |
|                            | 3 juni-augusti                          |                  |       |
|                            | 4 september-oktober                     |                  |       |
|                            | 5 november-december                     |                  |       |
| sv5 kvintiler för standard | 1 tredje kvintilen                      |                  |       |
|                            | 2 första kvintilen                      |                  |       |
|                            | 3 andra kvintilen                       |                  |       |
|                            | 4 fjärde kvintilen                      |                  |       |
|                            | 5 femte kvintilen                       |                  |       |
| holiday större helg        | 1 ingen större helg                     |                  |       |
|                            | 2 större helg (påsk/midsommar/julonyår) |                  |       |

## Categorical Variables Codings

|                            |                                         | Parameter coding |       |
|----------------------------|-----------------------------------------|------------------|-------|
|                            |                                         | (24)             | (25)  |
|                            | 404060001                               | ,000             | ,000  |
|                            | 404060002                               | 1,000            | ,000  |
|                            | 404310003                               | ,000             | 1,000 |
|                            | 404310004                               | ,000             | ,000  |
|                            | 502300005                               | ,000             | ,000  |
|                            | 502300006                               | ,000             | ,000  |
|                            | 502300007                               | ,000             | ,000  |
|                            | 502300214                               | ,000             | ,000  |
|                            | 502300411                               | ,000             | ,000  |
|                            | 502300415                               | ,000             | ,000  |
|                            | 502300416                               | ,000             | ,000  |
|                            | 502300811                               | ,000             | ,000  |
|                            | 502300913                               | ,000             | ,000  |
| weekday veckodag           | 1 måndag                                |                  |       |
|                            | 2 tisdag                                |                  |       |
|                            | 3 onsdag                                |                  |       |
|                            | 4 torsdag                               |                  |       |
|                            | 5 fredag                                |                  |       |
|                            | 6 lördag                                |                  |       |
|                            | 7 söndag                                |                  |       |
| season säsong/period       | 1 januari-mars                          |                  |       |
|                            | 2 april-maj                             |                  |       |
|                            | 3 juni-augusti                          |                  |       |
|                            | 4 september-oktober                     |                  |       |
|                            | 5 november-december                     |                  |       |
| sv5 kvintiler för standard | 1 tredje kvintilen                      |                  |       |
|                            | 2 första kvintilen                      |                  |       |
|                            | 3 andra kvintilen                       |                  |       |
|                            | 4 fjärde kvintilen                      |                  |       |
|                            | 5 femte kvintilen                       |                  |       |
| holiday större helg        | 1 ingen större helg                     |                  |       |
|                            | 2 större helg (påsk/midsommar/julonyår) |                  |       |

## Categorical Variables Codings

|                            |                                         | Parameter coding |       |
|----------------------------|-----------------------------------------|------------------|-------|
|                            |                                         | (26)             | (27)  |
|                            | 404060001                               | ,000             | ,000  |
|                            | 404060002                               | ,000             | ,000  |
|                            | 404310003                               | ,000             | ,000  |
|                            | 404310004                               | 1,000            | ,000  |
|                            | 502300005                               | ,000             | 1,000 |
|                            | 502300006                               | ,000             | ,000  |
|                            | 502300007                               | ,000             | ,000  |
|                            | 502300214                               | ,000             | ,000  |
|                            | 502300411                               | ,000             | ,000  |
|                            | 502300415                               | ,000             | ,000  |
|                            | 502300416                               | ,000             | ,000  |
|                            | 502300811                               | ,000             | ,000  |
|                            | 502300913                               | ,000             | ,000  |
| weekday veckodag           | 1 måndag                                |                  |       |
|                            | 2 tisdag                                |                  |       |
|                            | 3 onsdag                                |                  |       |
|                            | 4 torsdag                               |                  |       |
|                            | 5 fredag                                |                  |       |
|                            | 6 lördag                                |                  |       |
|                            | 7 söndag                                |                  |       |
| season säsong/period       | 1 januari-mars                          |                  |       |
|                            | 2 april-maj                             |                  |       |
|                            | 3 juni-augusti                          |                  |       |
|                            | 4 september-oktober                     |                  |       |
|                            | 5 november-december                     |                  |       |
| sv5 kvintiler för standard | 1 tredje kvintilen                      |                  |       |
|                            | 2 första kvintilen                      |                  |       |
|                            | 3 andra kvintilen                       |                  |       |
|                            | 4 fjärde kvintilen                      |                  |       |
|                            | 5 femte kvintilen                       |                  |       |
| holiday större helg        | 1 ingen större helg                     |                  |       |
|                            | 2 större helg (påsk/midsommar/julonyår) |                  |       |

## Categorical Variables Codings

|                            |                                         | Parameter coding |       |
|----------------------------|-----------------------------------------|------------------|-------|
|                            |                                         | (28)             | (29)  |
|                            | 404060001                               | ,000             | ,000  |
|                            | 404060002                               | ,000             | ,000  |
|                            | 404310003                               | ,000             | ,000  |
|                            | 404310004                               | ,000             | ,000  |
|                            | 502300005                               | ,000             | ,000  |
|                            | 502300006                               | 1,000            | ,000  |
|                            | 502300007                               | ,000             | 1,000 |
|                            | 502300214                               | ,000             | ,000  |
|                            | 502300411                               | ,000             | ,000  |
|                            | 502300415                               | ,000             | ,000  |
|                            | 502300416                               | ,000             | ,000  |
|                            | 502300811                               | ,000             | ,000  |
|                            | 502300913                               | ,000             | ,000  |
| weekday veckodag           | 1 måndag                                |                  |       |
|                            | 2 tisdag                                |                  |       |
|                            | 3 onsdag                                |                  |       |
|                            | 4 torsdag                               |                  |       |
|                            | 5 fredag                                |                  |       |
|                            | 6 lördag                                |                  |       |
|                            | 7 söndag                                |                  |       |
| season säsong/period       | 1 januari-mars                          |                  |       |
|                            | 2 april-maj                             |                  |       |
|                            | 3 juni-augusti                          |                  |       |
|                            | 4 september-oktober                     |                  |       |
|                            | 5 november-december                     |                  |       |
| sv5 kvintiler för standard | 1 tredje kvintilen                      |                  |       |
|                            | 2 första kvintilen                      |                  |       |
|                            | 3 andra kvintilen                       |                  |       |
|                            | 4 fjärde kvintilen                      |                  |       |
|                            | 5 femte kvintilen                       |                  |       |
| holiday större helg        | 1 ingen större helg                     |                  |       |
|                            | 2 större helg (påsk/midsommar/julonyår) |                  |       |

## Categorical Variables Codings

|                            |                                         | Parameter coding |       |
|----------------------------|-----------------------------------------|------------------|-------|
|                            |                                         | (30)             | (31)  |
|                            | 404060001                               | ,000             | ,000  |
|                            | 404060002                               | ,000             | ,000  |
|                            | 404310003                               | ,000             | ,000  |
|                            | 404310004                               | ,000             | ,000  |
|                            | 502300005                               | ,000             | ,000  |
|                            | 502300006                               | ,000             | ,000  |
|                            | 502300007                               | ,000             | ,000  |
|                            | 502300214                               | 1,000            | ,000  |
|                            | 502300411                               | ,000             | 1,000 |
|                            | 502300415                               | ,000             | ,000  |
|                            | 502300416                               | ,000             | ,000  |
|                            | 502300811                               | ,000             | ,000  |
|                            | 502300913                               | ,000             | ,000  |
| weekday veckodag           | 1 måndag                                |                  |       |
|                            | 2 tisdag                                |                  |       |
|                            | 3 onsdag                                |                  |       |
|                            | 4 torsdag                               |                  |       |
|                            | 5 fredag                                |                  |       |
|                            | 6 lördag                                |                  |       |
|                            | 7 söndag                                |                  |       |
| season säsong/period       | 1 januari-mars                          |                  |       |
|                            | 2 april-maj                             |                  |       |
|                            | 3 juni-augusti                          |                  |       |
|                            | 4 september-oktober                     |                  |       |
|                            | 5 november-december                     |                  |       |
| sv5 kvintiler för standard | 1 tredje kvintilen                      |                  |       |
|                            | 2 första kvintilen                      |                  |       |
|                            | 3 andra kvintilen                       |                  |       |
|                            | 4 fjärde kvintilen                      |                  |       |
|                            | 5 femte kvintilen                       |                  |       |
| holiday större helg        | 1 ingen större helg                     |                  |       |
|                            | 2 större helg (påsk/midsommar/julonyår) |                  |       |



## Categorical Variables Codings

|                            |                                         | Parameter coding |       |
|----------------------------|-----------------------------------------|------------------|-------|
|                            |                                         | (32)             | (33)  |
|                            | 404060001                               | ,000             | ,000  |
|                            | 404060002                               | ,000             | ,000  |
|                            | 404310003                               | ,000             | ,000  |
|                            | 404310004                               | ,000             | ,000  |
|                            | 502300005                               | ,000             | ,000  |
|                            | 502300006                               | ,000             | ,000  |
|                            | 502300007                               | ,000             | ,000  |
|                            | 502300214                               | ,000             | ,000  |
|                            | 502300411                               | ,000             | ,000  |
|                            | 502300415                               | 1,000            | ,000  |
|                            | 502300416                               | ,000             | 1,000 |
|                            | 502300811                               | ,000             | ,000  |
|                            | 502300913                               | ,000             | ,000  |
| weekday veckodag           | 1 måndag                                |                  |       |
|                            | 2 tisdag                                |                  |       |
|                            | 3 onsdag                                |                  |       |
|                            | 4 torsdag                               |                  |       |
|                            | 5 fredag                                |                  |       |
|                            | 6 lördag                                |                  |       |
|                            | 7 söndag                                |                  |       |
| season säsong/period       | 1 januari-mars                          |                  |       |
|                            | 2 april-maj                             |                  |       |
|                            | 3 juni-augusti                          |                  |       |
|                            | 4 september-oktober                     |                  |       |
|                            | 5 november-december                     |                  |       |
| sv5 kvintiler för standard | 1 tredje kvintilen                      |                  |       |
|                            | 2 första kvintilen                      |                  |       |
|                            | 3 andra kvintilen                       |                  |       |
|                            | 4 fjärde kvintilen                      |                  |       |
|                            | 5 femte kvintilen                       |                  |       |
| holiday större helg        | 1 ingen större helg                     |                  |       |
|                            | 2 större helg (påsk/midsommar/julonyår) |                  |       |

## Categorical Variables Codings

|                            |                                         | Parameter coding |       |
|----------------------------|-----------------------------------------|------------------|-------|
|                            |                                         | (34)             | (35)  |
|                            | 404060001                               | ,000             | ,000  |
|                            | 404060002                               | ,000             | ,000  |
|                            | 404310003                               | ,000             | ,000  |
|                            | 404310004                               | ,000             | ,000  |
|                            | 502300005                               | ,000             | ,000  |
|                            | 502300006                               | ,000             | ,000  |
|                            | 502300007                               | ,000             | ,000  |
|                            | 502300214                               | ,000             | ,000  |
|                            | 502300411                               | ,000             | ,000  |
|                            | 502300415                               | ,000             | ,000  |
|                            | 502300416                               | ,000             | ,000  |
|                            | 502300811                               | 1,000            | ,000  |
|                            | 502300913                               | ,000             | 1,000 |
| weekday veckodag           | 1 måndag                                |                  |       |
|                            | 2 tisdag                                |                  |       |
|                            | 3 onsdag                                |                  |       |
|                            | 4 torsdag                               |                  |       |
|                            | 5 fredag                                |                  |       |
|                            | 6 lördag                                |                  |       |
|                            | 7 söndag                                |                  |       |
| season säsong/period       | 1 januari-mars                          |                  |       |
|                            | 2 april-maj                             |                  |       |
|                            | 3 juni-augusti                          |                  |       |
|                            | 4 september-oktober                     |                  |       |
|                            | 5 november-december                     |                  |       |
| sv5 kvintiler för standard | 1 tredje kvintilen                      |                  |       |
|                            | 2 första kvintilen                      |                  |       |
|                            | 3 andra kvintilen                       |                  |       |
|                            | 4 fjärde kvintilen                      |                  |       |
|                            | 5 femte kvintilen                       |                  |       |
| holiday större helg        | 1 ingen större helg                     |                  |       |
|                            | 2 större helg (påsk/midsommar/julonyår) |                  |       |

**Block 0: Beginning Block**

Classification Table<sup>a,b</sup>

| Observed           |                             |                      | Predicted                   |                      |
|--------------------|-----------------------------|----------------------|-----------------------------|----------------------|
|                    |                             |                      | dod01 dödsfall ja eller nej |                      |
|                    |                             |                      | 0 inget dödsfall            | 1 minst ett dödsfall |
| Step 0             | dod01 dödsfall ja eller nej | 0 inget dödsfall     | 11839                       | 0                    |
|                    |                             | 1 minst ett dödsfall | 636                         | 0                    |
| Overall Percentage |                             |                      |                             |                      |

Classification Table<sup>a,b</sup>

| Observed           |                             |                      | Predicted          |
|--------------------|-----------------------------|----------------------|--------------------|
|                    |                             |                      | Percentage Correct |
| Step 0             | dod01 dödsfall ja eller nej | 0 inget dödsfall     | 100,0              |
|                    |                             | 1 minst ett dödsfall | ,0                 |
| Overall Percentage |                             |                      | 94,9               |

a. Constant is included in the model.

b. The cut value is ,500

Variables in the Equation

|                 | B      | S.E. | Wald     | df | Sig. | Exp(B) |
|-----------------|--------|------|----------|----|------|--------|
| Step 0 Constant | -2,924 | ,041 | 5160,279 | 1  | ,000 | ,054   |

## Variables not in the Equation

|        |           |            | Score   | df | Sig. |
|--------|-----------|------------|---------|----|------|
| Step 0 | Variables | sv5        | 81,660  | 4  | ,000 |
|        |           | sv5(1)     | 74,755  | 1  | ,000 |
|        |           | sv5(2)     | ,547    | 1  | ,460 |
|        |           | sv5(3)     | 22,471  | 1  | ,000 |
|        |           | sv5(4)     | 3,412   | 1  | ,065 |
|        |           | VASTY2     | 635,545 | 35 | ,000 |
|        |           | VASTY2(1)  | 2,519   | 1  | ,113 |
|        |           | VASTY2(2)  | 6,299   | 1  | ,012 |
|        |           | VASTY2(3)  | 8,957   | 1  | ,003 |
|        |           | VASTY2(4)  | ,151    | 1  | ,698 |
|        |           | VASTY2(5)  | 7,537   | 1  | ,006 |
|        |           | VASTY2(6)  | 20,142  | 1  | ,000 |
|        |           | VASTY2(7)  | 127,387 | 1  | ,000 |
|        |           | VASTY2(8)  | 8,957   | 1  | ,003 |
|        |           | VASTY2(9)  | ,163    | 1  | ,687 |
|        |           | VASTY2(10) | 7,570   | 1  | ,006 |
|        |           | VASTY2(11) | ,113    | 1  | ,737 |
|        |           | VASTY2(12) | 47,021  | 1  | ,000 |
|        |           | VASTY2(13) | 90,515  | 1  | ,000 |
|        |           | VASTY2(14) | 7,570   | 1  | ,006 |
|        |           | VASTY2(15) | ,151    | 1  | ,698 |
|        |           | VASTY2(16) | 4,298   | 1  | ,038 |
|        |           | VASTY2(17) | 20,199  | 1  | ,000 |
|        |           | VASTY2(18) | 17,916  | 1  | ,000 |
|        |           | VASTY2(19) | 18,086  | 1  | ,000 |
|        |           | VASTY2(20) | 10,563  | 1  | ,001 |
|        |           | VASTY2(21) | 1,696   | 1  | ,193 |
|        |           | VASTY2(22) | 26,693  | 1  | ,000 |
|        |           | VASTY2(23) | 1,125   | 1  | ,289 |
|        |           | VASTY2(24) | 72,662  | 1  | ,000 |
|        |           | VASTY2(25) | 2,477   | 1  | ,116 |
|        |           | VASTY2(26) | 16,006  | 1  | ,000 |
|        |           | VASTY2(27) | 20,256  | 1  | ,000 |
|        |           | VASTY2(28) | 12,309  | 1  | ,000 |
|        |           | VASTY2(29) | 20,256  | 1  | ,000 |
|        |           | VASTY2(30) | 1,263   | 1  | ,261 |
|        |           | VASTY2(31) | 20,256  | 1  | ,000 |
|        |           | VASTY2(32) | 15,810  | 1  | ,000 |
|        |           | VASTY2(33) | 17,973  | 1  | ,000 |
|        |           | VASTY2(34) | ,693    | 1  | ,405 |
|        |           | VASTY2(35) | 17,360  | 1  | ,000 |
|        |           | weekday    | 2,920   | 6  | ,819 |
|        |           | weekday(1) | ,422    | 1  | ,516 |

## Variables not in the Equation

|                    | Score   | df | Sig. |
|--------------------|---------|----|------|
| weekday(2)         | ,103    | 1  | ,749 |
| weekday(3)         | ,575    | 1  | ,448 |
| weekday(4)         | ,109    | 1  | ,741 |
| weekday(5)         | ,165    | 1  | ,685 |
| weekday(6)         | 1,908   | 1  | ,167 |
| holiday(1)         | ,270    | 1  | ,603 |
| season             | 9,040   | 4  | ,060 |
| season(1)          | ,504    | 1  | ,478 |
| season(2)          | 2,866   | 1  | ,090 |
| season(3)          | ,328    | 1  | ,567 |
| season(4)          | 7,145   | 1  | ,008 |
| Overall Statistics | 655,674 | 50 | ,000 |

## Block 1: Method = Enter

## Omnibus Tests of Model Coefficients

|             | Chi-square | df | Sig. |
|-------------|------------|----|------|
| Step 1 Step | 723,161    | 50 | ,000 |
| Block       | 723,161    | 50 | ,000 |
| Model       | 723,161    | 50 | ,000 |

## Model Summary

| Step | -2 Log likelihood     | Cox & Snell R Square | Nagelkerke R Square |
|------|-----------------------|----------------------|---------------------|
| 1    | 4301,681 <sup>a</sup> | ,056                 | ,170                |

a. Estimation terminated at iteration number 20 because maximum iterations has been reached. Final solution cannot be found.

Classification Table<sup>a</sup>

|                    |                             | Predicted        |                      |
|--------------------|-----------------------------|------------------|----------------------|
|                    |                             | 0 inget dödsfall | 1 minst ett dödsfall |
| Observed           | dod01 dödsfall ja eller nej | 11839            | 0                    |
|                    |                             | 636              | 0                    |
| Overall Percentage |                             |                  |                      |

Classification Table<sup>a</sup>

| Observed           |                             |                      | Predicted          |
|--------------------|-----------------------------|----------------------|--------------------|
|                    |                             |                      | Percentage Correct |
| Step 1             | dod01 dödsfall ja eller nej | 0 inget dödsfall     | 100,0              |
|                    |                             | 1 minst ett dödsfall | ,0                 |
| Overall Percentage |                             |                      | 94,9               |

a. The cut value is ,500

Variables in the Equation

|                         | B       | S.E.     | Wald    | df | Sig. | Exp(B) |
|-------------------------|---------|----------|---------|----|------|--------|
| Step 1 <sup>a</sup> sv5 |         |          | 6,999   | 4  | ,136 |        |
| sv5(1)                  | -,191   | ,154     | 1,547   | 1  | ,214 | ,826   |
| sv5(2)                  | -,064   | ,145     | ,193    | 1  | ,660 | ,938   |
| sv5(3)                  | ,102    | ,130     | ,614    | 1  | ,433 | 1,107  |
| sv5(4)                  | ,239    | ,147     | 2,620   | 1  | ,106 | 1,269  |
| VASTY2                  |         |          | 214,674 | 35 | ,000 |        |
| VASTY2(1)               | ,571    | ,344     | 2,759   | 1  | ,097 | 1,770  |
| VASTY2(2)               | ,629    | ,341     | 3,406   | 1  | ,065 | 1,876  |
| VASTY2(3)               | ,877    | ,332     | 6,990   | 1  | ,008 | 2,403  |
| VASTY2(4)               | ,234    | ,369     | ,402    | 1  | ,526 | 1,264  |
| VASTY2(5)               | -,672   | ,496     | 1,835   | 1  | ,176 | ,511   |
| VASTY2(6)               | -18,173 | 2102,360 | ,000    | 1  | ,993 | ,000   |
| VASTY2(7)               | 1,734   | ,306     | 32,192  | 1  | ,000 | 5,664  |
| VASTY2(8)               | ,909    | ,333     | 7,474   | 1  | ,006 | 2,483  |
| VASTY2(9)               | ,396    | ,361     | 1,201   | 1  | ,273 | 1,485  |
| VASTY2(10)              | ,637    | ,342     | 3,477   | 1  | ,062 | 1,891  |
| VASTY2(11)              | ,375    | ,357     | 1,101   | 1  | ,294 | 1,454  |
| VASTY2(12)              | 1,180   | ,319     | 13,652  | 1  | ,000 | 3,253  |
| VASTY2(13)              | 1,374   | ,319     | 18,547  | 1  | ,000 | 3,950  |
| VASTY2(14)              | ,708    | ,336     | 4,426   | 1  | ,035 | 2,029  |
| VASTY2(15)              | ,059    | ,375     | ,025    | 1  | ,874 | 1,061  |
| VASTY2(16)              | -,907   | ,645     | 1,975   | 1  | ,160 | ,404   |
| VASTY2(17)              | -17,933 | 2097,524 | ,000    | 1  | ,993 | ,000   |
| VASTY2(18)              | -2,476  | 1,044    | 5,627   | 1  | ,018 | ,084   |
| VASTY2(19)              | -2,480  | 1,044    | 5,640   | 1  | ,018 | ,084   |
| VASTY2(20)              | -1,475  | ,644     | 5,253   | 1  | ,022 | ,229   |
| VASTY2(21)              | ,612    | ,346     | 3,130   | 1  | ,077 | 1,844  |
| VASTY2(22)              | 1,123   | ,320     | 12,297  | 1  | ,000 | 3,075  |
| VASTY2(23)              | ,540    | ,348     | 2,405   | 1  | ,121 | 1,716  |
| VASTY2(24)              | 1,396   | ,312     | 20,084  | 1  | ,000 | 4,039  |
| VASTY2(25)              | -,166   | ,436     | ,145    | 1  | ,703 | ,847   |

## Variables in the Equation

|                     |            | 95% C.I. for EXP(B) |        |
|---------------------|------------|---------------------|--------|
|                     |            | Lower               | Upper  |
| Step 1 <sup>a</sup> | sv5        |                     |        |
|                     | sv5(1)     | ,611                | 1,116  |
|                     | sv5(2)     | ,706                | 1,247  |
|                     | sv5(3)     | ,859                | 1,427  |
|                     | sv5(4)     | ,951                | 1,694  |
|                     | VASTY2     |                     |        |
|                     | VASTY2(1)  | ,902                | 3,474  |
|                     | VASTY2(2)  | ,962                | 3,658  |
|                     | VASTY2(3)  | 1,255               | 4,601  |
|                     | VASTY2(4)  | ,613                | 2,606  |
|                     | VASTY2(5)  | ,193                | 1,350  |
|                     | VASTY2(6)  | ,000                | .      |
|                     | VASTY2(7)  | 3,112               | 10,311 |
|                     | VASTY2(8)  | 1,294               | 4,766  |
|                     | VASTY2(9)  | ,732                | 3,013  |
|                     | VASTY2(10) | ,968                | 3,695  |
|                     | VASTY2(11) | ,722                | 2,928  |
|                     | VASTY2(12) | 1,740               | 6,082  |
|                     | VASTY2(13) | 2,114               | 7,380  |
|                     | VASTY2(14) | 1,050               | 3,923  |
|                     | VASTY2(15) | ,509                | 2,212  |
|                     | VASTY2(16) | ,114                | 1,430  |
|                     | VASTY2(17) | ,000                | .      |
|                     | VASTY2(18) | ,011                | ,650   |
|                     | VASTY2(19) | ,011                | ,648   |
|                     | VASTY2(20) | ,065                | ,808   |
|                     | VASTY2(21) | ,936                | 3,631  |
|                     | VASTY2(22) | 1,641               | 5,761  |
|                     | VASTY2(23) | ,867                | 3,395  |
|                     | VASTY2(24) | 2,194               | 7,439  |
|                     | VASTY2(25) | ,360                | 1,992  |

review only

## Variables in the Equation

|            | B       | S.E.     | Wald    | df | Sig. | Exp(B) |
|------------|---------|----------|---------|----|------|--------|
| VASTY2(26) | -18,008 | 2350,383 | ,000    | 1  | ,994 | ,000   |
| VASTY2(27) | -18,106 | 2095,745 | ,000    | 1  | ,993 | ,000   |
| VASTY2(28) | -18,169 | 2675,548 | ,000    | 1  | ,995 | ,000   |
| VASTY2(29) | -18,220 | 2098,403 | ,000    | 1  | ,993 | ,000   |
| VASTY2(30) | ,061    | ,387     | ,025    | 1  | ,876 | 1,063  |
| VASTY2(31) | -17,824 | 2097,875 | ,000    | 1  | ,993 | ,000   |
| VASTY2(32) | -1,784  | ,768     | 5,395   | 1  | ,020 | ,168   |
| VASTY2(33) | -2,486  | 1,044    | 5,667   | 1  | ,017 | ,083   |
| VASTY2(34) | ,470    | ,351     | 1,794   | 1  | ,180 | 1,600  |
| VASTY2(35) | -18,001 | 2257,506 | ,000    | 1  | ,994 | ,000   |
| weekday    |         |          | 3,314   | 6  | ,769 |        |
| weekday(1) | ,025    | ,152     | ,026    | 1  | ,871 | 1,025  |
| weekday(2) | -,070   | ,156     | ,201    | 1  | ,654 | ,932   |
| weekday(3) | ,043    | ,153     | ,079    | 1  | ,779 | 1,044  |
| weekday(4) | ,028    | ,155     | ,033    | 1  | ,856 | 1,028  |
| weekday(5) | -,065   | ,158     | ,171    | 1  | ,680 | ,937   |
| weekday(6) | -,200   | ,162     | 1,526   | 1  | ,217 | ,819   |
| holiday(1) | -,254   | ,256     | ,981    | 1  | ,322 | ,776   |
| season     |         |          | 6,843   | 4  | ,144 |        |
| season(1)  | ,028    | ,129     | ,049    | 1  | ,825 | 1,029  |
| season(2)  | ,053    | ,119     | ,203    | 1  | ,653 | 1,055  |
| season(3)  | -,080   | ,133     | ,362    | 1  | ,547 | ,923   |
| season(4)  | -,294   | ,142     | 4,264   | 1  | ,039 | ,745   |
| Constant   | -3,148  | ,311     | 102,700 | 1  | ,000 | ,043   |



## Variables in the Equation

|            | 95% C.I. for EXP(B) |       |
|------------|---------------------|-------|
|            | Lower               | Upper |
| VASTY2(26) | ,000                | .     |
| VASTY2(27) | ,000                | .     |
| VASTY2(28) | ,000                | .     |
| VASTY2(29) | ,000                | .     |
| VASTY2(30) | ,497                | 2,270 |
| VASTY2(31) | ,000                | .     |
| VASTY2(32) | ,037                | ,757  |
| VASTY2(33) | ,011                | ,645  |
| VASTY2(34) | ,804                | 3,180 |
| VASTY2(35) | ,000                | .     |
| weekday    |                     |       |
| weekday(1) | ,760                | 1,382 |
| weekday(2) | ,687                | 1,266 |
| weekday(3) | ,774                | 1,408 |
| weekday(4) | ,760                | 1,392 |
| weekday(5) | ,687                | 1,277 |
| weekday(6) | ,597                | 1,124 |
| holiday    |                     |       |
| holiday(1) | ,470                | 1,282 |
| season     |                     |       |
| season(1)  | ,800                | 1,324 |
| season(2)  | ,836                | 1,331 |
| season(3)  | ,712                | 1,197 |
| season(4)  | ,564                | ,985  |
| Constant   |                     |       |

a. Variable(s) entered on step 1: sv5, VASTY2, weekday, holiday, season.

```
LOGISTIC REGRESSION VARIABLES dod01
  /METHOD=ENTER sv7 VASTY2 weekday holiday season
  /CONTRAST (sv7)=Indicator(1)
  /CONTRAST (VASTY2)=Indicator(1)
  /CONTRAST (weekday)=Indicator(1)
  /CONTRAST (holiday)=Indicator(1)
  /CONTRAST (season)=Indicator(1)
  /PRINT=CI(95)
  /CRITERIA=PIN(0.05) POUT(0.10) ITERATE(20) CUT(0.5).
```

## Logistic Regression

[DataSet6] C:\cWordjan\Rafaela\_VCS\alla\_tillsammans\abo\_bjo\_vasa\_v1.sav

### Case Processing Summary

| Unweighted Cases <sup>a</sup> |                      | N     | Percent |
|-------------------------------|----------------------|-------|---------|
| Selected Cases                | Included in Analysis | 12475 | 100,0   |
|                               | Missing Cases        | 0     | ,0      |
|                               | Total                | 12475 | 100,0   |
| Unselected Cases              |                      | 0     | ,0      |
| Total                         |                      | 12475 | 100,0   |

a. If weight is in effect, see classification table for the total number of cases.

### Dependent Variable Encoding

| Original Value       | Internal Value |
|----------------------|----------------|
| 0 inget dödsfall     | 0              |
| 1 minst ett dödsfall | 1              |

### Categorical Variables Codings

|                           | Frequency | Parameter |
|---------------------------|-----------|-----------|
|                           |           | (1)       |
| VASTY2 (SAIR*10000)+VASTY | 365       | ,000      |
| 403073101                 | 362       | 1,000     |
| 403073102                 | 365       | ,000      |
| 403073103                 | 365       | ,000      |
| 403073202                 | 365       | ,000      |
| 403073203                 | 330       | ,000      |
| 403073204                 | 364       | ,000      |
| 403073303                 | 362       | ,000      |
| 403073651                 | 365       | ,000      |
| 403073771                 | 341       | ,000      |
| 403133102                 | 365       | ,000      |
| 403133106                 | 365       | ,000      |
| 403133107                 | 365       | ,000      |
| 403133109                 | 365       | ,000      |
| 403133202                 | 365       | ,000      |
| 403133203                 | 365       | ,000      |
| 403133204                 | 365       | ,000      |
| 403133315                 | 177       | ,000      |
| 403133322                 | 365       | ,000      |
| 403133401                 | 362       | ,000      |
| 403133402                 | 365       | ,000      |
| 403133550                 | 298       | ,000      |
| 403133772                 | 365       | ,000      |
| 403135803                 | 365       | ,000      |
| 404060001                 | 365       | ,000      |
| 404060002                 | 366       | ,000      |
| 404310003                 | 291       | ,000      |
| 404310004                 | 291       | ,000      |

**Categorical Variables Codings**

|                           |           | Parameter coding |       |
|---------------------------|-----------|------------------|-------|
|                           |           | (2)              | (3)   |
| VASTY2 (SAIR*10000)+VASTY | 403073101 | ,000             | ,000  |
|                           | 403073102 | ,000             | ,000  |
|                           | 403073103 | 1,000            | ,000  |
|                           | 403073202 | ,000             | 1,000 |
|                           | 403073203 | ,000             | ,000  |
|                           | 403073204 | ,000             | ,000  |
|                           | 403073303 | ,000             | ,000  |
|                           | 403073651 | ,000             | ,000  |
|                           | 403073771 | ,000             | ,000  |
|                           | 403133102 | ,000             | ,000  |
|                           | 403133106 | ,000             | ,000  |
|                           | 403133107 | ,000             | ,000  |
|                           | 403133109 | ,000             | ,000  |
|                           | 403133202 | ,000             | ,000  |
|                           | 403133203 | ,000             | ,000  |
|                           | 403133204 | ,000             | ,000  |
|                           | 403133315 | ,000             | ,000  |
|                           | 403133322 | ,000             | ,000  |
|                           | 403133401 | ,000             | ,000  |
|                           | 403133402 | ,000             | ,000  |
|                           | 403133550 | ,000             | ,000  |
|                           | 403133772 | ,000             | ,000  |
|                           | 403135803 | ,000             | ,000  |
|                           | 404060001 | ,000             | ,000  |
|                           | 404060002 | ,000             | ,000  |
|                           | 404310003 | ,000             | ,000  |
|                           | 404310004 | ,000             | ,000  |

BMJ

## Categorical Variables Codings

|                           |           | Parameter coding |       |
|---------------------------|-----------|------------------|-------|
|                           |           | (4)              | (5)   |
| VASTY2 (SAIR*10000)+VASTY | 403073101 | ,000             | ,000  |
|                           | 403073102 | ,000             | ,000  |
|                           | 403073103 | ,000             | ,000  |
|                           | 403073202 | ,000             | ,000  |
|                           | 403073203 | 1,000            | ,000  |
|                           | 403073204 | ,000             | 1,000 |
|                           | 403073303 | ,000             | ,000  |
|                           | 403073651 | ,000             | ,000  |
|                           | 403073771 | ,000             | ,000  |
|                           | 403133102 | ,000             | ,000  |
|                           | 403133106 | ,000             | ,000  |
|                           | 403133107 | ,000             | ,000  |
|                           | 403133109 | ,000             | ,000  |
|                           | 403133202 | ,000             | ,000  |
|                           | 403133203 | ,000             | ,000  |
|                           | 403133204 | ,000             | ,000  |
|                           | 403133315 | ,000             | ,000  |
|                           | 403133322 | ,000             | ,000  |
|                           | 403133401 | ,000             | ,000  |
|                           | 403133402 | ,000             | ,000  |
|                           | 403133550 | ,000             | ,000  |
|                           | 403133772 | ,000             | ,000  |
|                           | 403135803 | ,000             | ,000  |
|                           | 404060001 | ,000             | ,000  |
|                           | 404060002 | ,000             | ,000  |
|                           | 404310003 | ,000             | ,000  |
|                           | 404310004 | ,000             | ,000  |

1  
2  
3  
4  
5  
6  
7  
8  
9  
10  
11  
12  
13  
14  
15  
16  
17  
18  
19  
20  
21  
22  
23  
24  
25  
26  
27  
28  
29  
30  
31  
32  
33  
34  
35  
36  
37  
38  
39  
40  
41  
42  
43  
44  
45  
46  
47  
48  
49  
50  
51  
52  
53  
54  
55  
56  
57  
58  
59  
60

**Categorical Variables Codings**

|                           |           | Parameter coding |       |
|---------------------------|-----------|------------------|-------|
|                           |           | (6)              | (7)   |
| VASTY2 (SAIR*10000)+VASTY | 403073101 | ,000             | ,000  |
|                           | 403073102 | ,000             | ,000  |
|                           | 403073103 | ,000             | ,000  |
|                           | 403073202 | ,000             | ,000  |
|                           | 403073203 | ,000             | ,000  |
|                           | 403073204 | ,000             | ,000  |
|                           | 403073303 | 1,000            | ,000  |
|                           | 403073651 | ,000             | 1,000 |
|                           | 403073771 | ,000             | ,000  |
|                           | 403133102 | ,000             | ,000  |
|                           | 403133106 | ,000             | ,000  |
|                           | 403133107 | ,000             | ,000  |
|                           | 403133109 | ,000             | ,000  |
|                           | 403133202 | ,000             | ,000  |
|                           | 403133203 | ,000             | ,000  |
|                           | 403133204 | ,000             | ,000  |
|                           | 403133315 | ,000             | ,000  |
|                           | 403133322 | ,000             | ,000  |
|                           | 403133401 | ,000             | ,000  |
|                           | 403133402 | ,000             | ,000  |
|                           | 403133550 | ,000             | ,000  |
|                           | 403133772 | ,000             | ,000  |
|                           | 403135803 | ,000             | ,000  |
|                           | 404060001 | ,000             | ,000  |
|                           | 404060002 | ,000             | ,000  |
|                           | 404310003 | ,000             | ,000  |
|                           | 404310004 | ,000             | ,000  |

## Categorical Variables Codings

|                           |           | Parameter coding |       |
|---------------------------|-----------|------------------|-------|
|                           |           | (8)              | (9)   |
| VASTY2 (SAIR*10000)+VASTY | 403073101 | ,000             | ,000  |
|                           | 403073102 | ,000             | ,000  |
|                           | 403073103 | ,000             | ,000  |
|                           | 403073202 | ,000             | ,000  |
|                           | 403073203 | ,000             | ,000  |
|                           | 403073204 | ,000             | ,000  |
|                           | 403073303 | ,000             | ,000  |
|                           | 403073651 | ,000             | ,000  |
|                           | 403073771 | 1,000            | ,000  |
|                           | 403133102 | ,000             | 1,000 |
|                           | 403133106 | ,000             | ,000  |
|                           | 403133107 | ,000             | ,000  |
|                           | 403133109 | ,000             | ,000  |
|                           | 403133202 | ,000             | ,000  |
|                           | 403133203 | ,000             | ,000  |
|                           | 403133204 | ,000             | ,000  |
|                           | 403133315 | ,000             | ,000  |
|                           | 403133322 | ,000             | ,000  |
|                           | 403133401 | ,000             | ,000  |
|                           | 403133402 | ,000             | ,000  |
|                           | 403133550 | ,000             | ,000  |
|                           | 403133772 | ,000             | ,000  |
|                           | 403135803 | ,000             | ,000  |
|                           | 404060001 | ,000             | ,000  |
|                           | 404060002 | ,000             | ,000  |
|                           | 404310003 | ,000             | ,000  |
|                           | 404310004 | ,000             | ,000  |

1  
2  
3  
4  
5  
6  
7  
8  
9  
10  
11  
12  
13  
14  
15  
16  
17  
18  
19  
20  
21  
22  
23  
24  
25  
26  
27  
28  
29  
30  
31  
32  
33  
34  
35  
36  
37  
38  
39  
40  
41  
42  
43  
44  
45  
46  
47  
48  
49  
50  
51  
52  
53  
54  
55  
56  
57  
58  
59  
60

**Categorical Variables Codings**

|                           |           | Parameter coding |       |
|---------------------------|-----------|------------------|-------|
|                           |           | (10)             | (11)  |
| VASTY2 (SAIR*10000)+VASTY | 403073101 | ,000             | ,000  |
|                           | 403073102 | ,000             | ,000  |
|                           | 403073103 | ,000             | ,000  |
|                           | 403073202 | ,000             | ,000  |
|                           | 403073203 | ,000             | ,000  |
|                           | 403073204 | ,000             | ,000  |
|                           | 403073303 | ,000             | ,000  |
|                           | 403073651 | ,000             | ,000  |
|                           | 403073771 | ,000             | ,000  |
|                           | 403133102 | ,000             | ,000  |
|                           | 403133106 | 1,000            | ,000  |
|                           | 403133107 | ,000             | 1,000 |
|                           | 403133109 | ,000             | ,000  |
|                           | 403133202 | ,000             | ,000  |
|                           | 403133203 | ,000             | ,000  |
|                           | 403133204 | ,000             | ,000  |
|                           | 403133315 | ,000             | ,000  |
|                           | 403133322 | ,000             | ,000  |
|                           | 403133401 | ,000             | ,000  |
|                           | 403133402 | ,000             | ,000  |
|                           | 403133550 | ,000             | ,000  |
|                           | 403133772 | ,000             | ,000  |
|                           | 403135803 | ,000             | ,000  |
|                           | 404060001 | ,000             | ,000  |
|                           | 404060002 | ,000             | ,000  |
|                           | 404310003 | ,000             | ,000  |
|                           | 404310004 | ,000             | ,000  |

## Categorical Variables Codings

|                           |           | Parameter coding |       |
|---------------------------|-----------|------------------|-------|
|                           |           | (12)             | (13)  |
| VASTY2 (SAIR*10000)+VASTY | 403073101 | ,000             | ,000  |
|                           | 403073102 | ,000             | ,000  |
|                           | 403073103 | ,000             | ,000  |
|                           | 403073202 | ,000             | ,000  |
|                           | 403073203 | ,000             | ,000  |
|                           | 403073204 | ,000             | ,000  |
|                           | 403073303 | ,000             | ,000  |
|                           | 403073651 | ,000             | ,000  |
|                           | 403073771 | ,000             | ,000  |
|                           | 403133102 | ,000             | ,000  |
|                           | 403133106 | ,000             | ,000  |
|                           | 403133107 | ,000             | ,000  |
|                           | 403133109 | 1,000            | ,000  |
|                           | 403133202 | ,000             | 1,000 |
|                           | 403133203 | ,000             | ,000  |
|                           | 403133204 | ,000             | ,000  |
|                           | 403133315 | ,000             | ,000  |
|                           | 403133322 | ,000             | ,000  |
|                           | 403133401 | ,000             | ,000  |
|                           | 403133402 | ,000             | ,000  |
|                           | 403133550 | ,000             | ,000  |
|                           | 403133772 | ,000             | ,000  |
|                           | 403135803 | ,000             | ,000  |
|                           | 404060001 | ,000             | ,000  |
|                           | 404060002 | ,000             | ,000  |
|                           | 404310003 | ,000             | ,000  |
|                           | 404310004 | ,000             | ,000  |



**Categorical Variables Codings**

|                           |           | Parameter coding |       |
|---------------------------|-----------|------------------|-------|
|                           |           | (14)             | (15)  |
| VASTY2 (SAIR*10000)+VASTY | 403073101 | ,000             | ,000  |
|                           | 403073102 | ,000             | ,000  |
|                           | 403073103 | ,000             | ,000  |
|                           | 403073202 | ,000             | ,000  |
|                           | 403073203 | ,000             | ,000  |
|                           | 403073204 | ,000             | ,000  |
|                           | 403073303 | ,000             | ,000  |
|                           | 403073651 | ,000             | ,000  |
|                           | 403073771 | ,000             | ,000  |
|                           | 403133102 | ,000             | ,000  |
|                           | 403133106 | ,000             | ,000  |
|                           | 403133107 | ,000             | ,000  |
|                           | 403133109 | ,000             | ,000  |
|                           | 403133202 | ,000             | ,000  |
|                           | 403133203 | 1,000            | ,000  |
|                           | 403133204 | ,000             | 1,000 |
|                           | 403133315 | ,000             | ,000  |
|                           | 403133322 | ,000             | ,000  |
|                           | 403133401 | ,000             | ,000  |
|                           | 403133402 | ,000             | ,000  |
|                           | 403133550 | ,000             | ,000  |
|                           | 403133772 | ,000             | ,000  |
|                           | 403135803 | ,000             | ,000  |
|                           | 404060001 | ,000             | ,000  |
|                           | 404060002 | ,000             | ,000  |
|                           | 404310003 | ,000             | ,000  |
|                           | 404310004 | ,000             | ,000  |

BMJ

## Categorical Variables Codings

|                           |           | Parameter coding |       |
|---------------------------|-----------|------------------|-------|
|                           |           | (16)             | (17)  |
| VASTY2 (SAIR*10000)+VASTY | 403073101 | ,000             | ,000  |
|                           | 403073102 | ,000             | ,000  |
|                           | 403073103 | ,000             | ,000  |
|                           | 403073202 | ,000             | ,000  |
|                           | 403073203 | ,000             | ,000  |
|                           | 403073204 | ,000             | ,000  |
|                           | 403073303 | ,000             | ,000  |
|                           | 403073651 | ,000             | ,000  |
|                           | 403073771 | ,000             | ,000  |
|                           | 403133102 | ,000             | ,000  |
|                           | 403133106 | ,000             | ,000  |
|                           | 403133107 | ,000             | ,000  |
|                           | 403133109 | ,000             | ,000  |
|                           | 403133202 | ,000             | ,000  |
|                           | 403133203 | ,000             | ,000  |
|                           | 403133204 | ,000             | ,000  |
|                           | 403133315 | 1,000            | ,000  |
|                           | 403133322 | ,000             | 1,000 |
|                           | 403133401 | ,000             | ,000  |
|                           | 403133402 | ,000             | ,000  |
|                           | 403133550 | ,000             | ,000  |
|                           | 403133772 | ,000             | ,000  |
|                           | 403135803 | ,000             | ,000  |
|                           | 404060001 | ,000             | ,000  |
|                           | 404060002 | ,000             | ,000  |
|                           | 404310003 | ,000             | ,000  |
|                           | 404310004 | ,000             | ,000  |

Categorical Variables Codings

|                           |           | Parameter coding |       |
|---------------------------|-----------|------------------|-------|
|                           |           | (18)             | (19)  |
| VASTY2 (SAIR*10000)+VASTY | 403073101 | ,000             | ,000  |
|                           | 403073102 | ,000             | ,000  |
|                           | 403073103 | ,000             | ,000  |
|                           | 403073202 | ,000             | ,000  |
|                           | 403073203 | ,000             | ,000  |
|                           | 403073204 | ,000             | ,000  |
|                           | 403073303 | ,000             | ,000  |
|                           | 403073651 | ,000             | ,000  |
|                           | 403073771 | ,000             | ,000  |
|                           | 403133102 | ,000             | ,000  |
|                           | 403133106 | ,000             | ,000  |
|                           | 403133107 | ,000             | ,000  |
|                           | 403133109 | ,000             | ,000  |
|                           | 403133202 | ,000             | ,000  |
|                           | 403133203 | ,000             | ,000  |
|                           | 403133204 | ,000             | ,000  |
|                           | 403133315 | ,000             | ,000  |
|                           | 403133322 | ,000             | ,000  |
|                           | 403133401 | 1,000            | ,000  |
|                           | 403133402 | ,000             | 1,000 |
|                           | 403133550 | ,000             | ,000  |
|                           | 403133772 | ,000             | ,000  |
|                           | 403135803 | ,000             | ,000  |
|                           | 404060001 | ,000             | ,000  |
|                           | 404060002 | ,000             | ,000  |
|                           | 404310003 | ,000             | ,000  |
|                           | 404310004 | ,000             | ,000  |

BMJ

## Categorical Variables Codings

|                           |           | Parameter coding |       |
|---------------------------|-----------|------------------|-------|
|                           |           | (20)             | (21)  |
| VASTY2 (SAIR*10000)+VASTY | 403073101 | ,000             | ,000  |
|                           | 403073102 | ,000             | ,000  |
|                           | 403073103 | ,000             | ,000  |
|                           | 403073202 | ,000             | ,000  |
|                           | 403073203 | ,000             | ,000  |
|                           | 403073204 | ,000             | ,000  |
|                           | 403073303 | ,000             | ,000  |
|                           | 403073651 | ,000             | ,000  |
|                           | 403073771 | ,000             | ,000  |
|                           | 403133102 | ,000             | ,000  |
|                           | 403133106 | ,000             | ,000  |
|                           | 403133107 | ,000             | ,000  |
|                           | 403133109 | ,000             | ,000  |
|                           | 403133202 | ,000             | ,000  |
|                           | 403133203 | ,000             | ,000  |
|                           | 403133204 | ,000             | ,000  |
|                           | 403133315 | ,000             | ,000  |
|                           | 403133322 | ,000             | ,000  |
|                           | 403133401 | ,000             | ,000  |
|                           | 403133402 | ,000             | ,000  |
|                           | 403133550 | 1,000            | ,000  |
|                           | 403133772 | ,000             | 1,000 |
|                           | 403135803 | ,000             | ,000  |
|                           | 404060001 | ,000             | ,000  |
|                           | 404060002 | ,000             | ,000  |
|                           | 404310003 | ,000             | ,000  |
|                           | 404310004 | ,000             | ,000  |

1  
2  
3  
4  
5  
6  
7  
8  
9  
10  
11  
12  
13  
14  
15  
16  
17  
18  
19  
20  
21  
22  
23  
24  
25  
26  
27  
28  
29  
30  
31  
32  
33  
34  
35  
36  
37  
38  
39  
40  
41  
42  
43  
44  
45  
46  
47  
48  
49  
50  
51  
52  
53  
54  
55  
56  
57  
58  
59  
60

**Categorical Variables Codings**

|                           |           | Parameter coding |       |
|---------------------------|-----------|------------------|-------|
|                           |           | (22)             | (23)  |
| VASTY2 (SAIR*10000)+VASTY | 403073101 | ,000             | ,000  |
|                           | 403073102 | ,000             | ,000  |
|                           | 403073103 | ,000             | ,000  |
|                           | 403073202 | ,000             | ,000  |
|                           | 403073203 | ,000             | ,000  |
|                           | 403073204 | ,000             | ,000  |
|                           | 403073303 | ,000             | ,000  |
|                           | 403073651 | ,000             | ,000  |
|                           | 403073771 | ,000             | ,000  |
|                           | 403133102 | ,000             | ,000  |
|                           | 403133106 | ,000             | ,000  |
|                           | 403133107 | ,000             | ,000  |
|                           | 403133109 | ,000             | ,000  |
|                           | 403133202 | ,000             | ,000  |
|                           | 403133203 | ,000             | ,000  |
|                           | 403133204 | ,000             | ,000  |
|                           | 403133315 | ,000             | ,000  |
|                           | 403133322 | ,000             | ,000  |
|                           | 403133401 | ,000             | ,000  |
|                           | 403133402 | ,000             | ,000  |
|                           | 403133550 | ,000             | ,000  |
|                           | 403133772 | ,000             | ,000  |
|                           | 403135803 | 1,000            | ,000  |
|                           | 404060001 | ,000             | 1,000 |
|                           | 404060002 | ,000             | ,000  |
|                           | 404310003 | ,000             | ,000  |
|                           | 404310004 | ,000             | ,000  |

## Categorical Variables Codings

|                           |           | Parameter coding |       |
|---------------------------|-----------|------------------|-------|
|                           |           | (24)             | (25)  |
| VASTY2 (SAIR*10000)+VASTY | 403073101 | ,000             | ,000  |
|                           | 403073102 | ,000             | ,000  |
|                           | 403073103 | ,000             | ,000  |
|                           | 403073202 | ,000             | ,000  |
|                           | 403073203 | ,000             | ,000  |
|                           | 403073204 | ,000             | ,000  |
|                           | 403073303 | ,000             | ,000  |
|                           | 403073651 | ,000             | ,000  |
|                           | 403073771 | ,000             | ,000  |
|                           | 403133102 | ,000             | ,000  |
|                           | 403133106 | ,000             | ,000  |
|                           | 403133107 | ,000             | ,000  |
|                           | 403133109 | ,000             | ,000  |
|                           | 403133202 | ,000             | ,000  |
|                           | 403133203 | ,000             | ,000  |
|                           | 403133204 | ,000             | ,000  |
|                           | 403133315 | ,000             | ,000  |
|                           | 403133322 | ,000             | ,000  |
|                           | 403133401 | ,000             | ,000  |
|                           | 403133402 | ,000             | ,000  |
|                           | 403133550 | ,000             | ,000  |
|                           | 403133772 | ,000             | ,000  |
|                           | 403135803 | ,000             | ,000  |
|                           | 404060001 | ,000             | ,000  |
|                           | 404060002 | 1,000            | ,000  |
|                           | 404310003 | ,000             | 1,000 |
|                           | 404310004 | ,000             | ,000  |

1  
2  
3  
4  
5  
6  
7  
8  
9  
10  
11  
12  
13  
14  
15  
16  
17  
18  
19  
20  
21  
22  
23  
24  
25  
26  
27  
28  
29  
30  
31  
32  
33  
34  
35  
36  
37  
38  
39  
40  
41  
42  
43  
44  
45  
46  
47  
48  
49  
50  
51  
52  
53  
54  
55  
56  
57  
58  
59  
60

**Categorical Variables Codings**

|                           |           | Parameter coding |      |
|---------------------------|-----------|------------------|------|
|                           |           | (26)             | (27) |
| VASTY2 (SAIR*10000)+VASTY | 403073101 | ,000             | ,000 |
|                           | 403073102 | ,000             | ,000 |
|                           | 403073103 | ,000             | ,000 |
|                           | 403073202 | ,000             | ,000 |
|                           | 403073203 | ,000             | ,000 |
|                           | 403073204 | ,000             | ,000 |
|                           | 403073303 | ,000             | ,000 |
|                           | 403073651 | ,000             | ,000 |
|                           | 403073771 | ,000             | ,000 |
|                           | 403133102 | ,000             | ,000 |
|                           | 403133106 | ,000             | ,000 |
|                           | 403133107 | ,000             | ,000 |
|                           | 403133109 | ,000             | ,000 |
|                           | 403133202 | ,000             | ,000 |
|                           | 403133203 | ,000             | ,000 |
|                           | 403133204 | ,000             | ,000 |
|                           | 403133315 | ,000             | ,000 |
|                           | 403133322 | ,000             | ,000 |
|                           | 403133401 | ,000             | ,000 |
|                           | 403133402 | ,000             | ,000 |
|                           | 403133550 | ,000             | ,000 |
|                           | 403133772 | ,000             | ,000 |
|                           | 403135803 | ,000             | ,000 |
|                           | 404060001 | ,000             | ,000 |
|                           | 404060002 | ,000             | ,000 |
|                           | 404310003 | ,000             | ,000 |
|                           | 404310004 | 1,000            | ,000 |

## Categorical Variables Codings

|                           |           | Parameter coding |      |
|---------------------------|-----------|------------------|------|
|                           |           | (28)             | (29) |
| VASTY2 (SAIR*10000)+VASTY | 403073101 | ,000             | ,000 |
|                           | 403073102 | ,000             | ,000 |
|                           | 403073103 | ,000             | ,000 |
|                           | 403073202 | ,000             | ,000 |
|                           | 403073203 | ,000             | ,000 |
|                           | 403073204 | ,000             | ,000 |
|                           | 403073303 | ,000             | ,000 |
|                           | 403073651 | ,000             | ,000 |
|                           | 403073771 | ,000             | ,000 |
|                           | 403133102 | ,000             | ,000 |
|                           | 403133106 | ,000             | ,000 |
|                           | 403133107 | ,000             | ,000 |
|                           | 403133109 | ,000             | ,000 |
|                           | 403133202 | ,000             | ,000 |
|                           | 403133203 | ,000             | ,000 |
|                           | 403133204 | ,000             | ,000 |
|                           | 403133315 | ,000             | ,000 |
|                           | 403133322 | ,000             | ,000 |
|                           | 403133401 | ,000             | ,000 |
|                           | 403133402 | ,000             | ,000 |
|                           | 403133550 | ,000             | ,000 |
|                           | 403133772 | ,000             | ,000 |
|                           | 403135803 | ,000             | ,000 |
|                           | 404060001 | ,000             | ,000 |
|                           | 404060002 | ,000             | ,000 |
|                           | 404310003 | ,000             | ,000 |
|                           | 404310004 | ,000             | ,000 |



1  
2  
3  
4  
5  
6  
7  
8  
9  
10  
11  
12  
13  
14  
15  
16  
17  
18  
19  
20  
21  
22  
23  
24  
25  
26  
27  
28  
29  
30  
31  
32  
33  
34  
35  
36  
37  
38  
39  
40  
41  
42  
43  
44  
45  
46  
47  
48  
49  
50  
51  
52  
53  
54  
55  
56  
57  
58  
59  
60

**Categorical Variables Codings**

|                           |           | Parameter coding |      |
|---------------------------|-----------|------------------|------|
|                           |           | (30)             | (31) |
| VASTY2 (SAIR*10000)+VASTY | 403073101 | ,000             | ,000 |
|                           | 403073102 | ,000             | ,000 |
|                           | 403073103 | ,000             | ,000 |
|                           | 403073202 | ,000             | ,000 |
|                           | 403073203 | ,000             | ,000 |
|                           | 403073204 | ,000             | ,000 |
|                           | 403073303 | ,000             | ,000 |
|                           | 403073651 | ,000             | ,000 |
|                           | 403073771 | ,000             | ,000 |
|                           | 403133102 | ,000             | ,000 |
|                           | 403133106 | ,000             | ,000 |
|                           | 403133107 | ,000             | ,000 |
|                           | 403133109 | ,000             | ,000 |
|                           | 403133202 | ,000             | ,000 |
|                           | 403133203 | ,000             | ,000 |
|                           | 403133204 | ,000             | ,000 |
|                           | 403133315 | ,000             | ,000 |
|                           | 403133322 | ,000             | ,000 |
|                           | 403133401 | ,000             | ,000 |
|                           | 403133402 | ,000             | ,000 |
|                           | 403133550 | ,000             | ,000 |
|                           | 403133772 | ,000             | ,000 |
|                           | 403135803 | ,000             | ,000 |
|                           | 404060001 | ,000             | ,000 |
|                           | 404060002 | ,000             | ,000 |
|                           | 404310003 | ,000             | ,000 |
|                           | 404310004 | ,000             | ,000 |

## Categorical Variables Codings

|                           |           | Parameter coding |      |
|---------------------------|-----------|------------------|------|
|                           |           | (32)             | (33) |
| VASTY2 (SAIR*10000)+VASTY | 403073101 | ,000             | ,000 |
|                           | 403073102 | ,000             | ,000 |
|                           | 403073103 | ,000             | ,000 |
|                           | 403073202 | ,000             | ,000 |
|                           | 403073203 | ,000             | ,000 |
|                           | 403073204 | ,000             | ,000 |
|                           | 403073303 | ,000             | ,000 |
|                           | 403073651 | ,000             | ,000 |
|                           | 403073771 | ,000             | ,000 |
|                           | 403133102 | ,000             | ,000 |
|                           | 403133106 | ,000             | ,000 |
|                           | 403133107 | ,000             | ,000 |
|                           | 403133109 | ,000             | ,000 |
|                           | 403133202 | ,000             | ,000 |
|                           | 403133203 | ,000             | ,000 |
|                           | 403133204 | ,000             | ,000 |
|                           | 403133315 | ,000             | ,000 |
|                           | 403133322 | ,000             | ,000 |
|                           | 403133401 | ,000             | ,000 |
|                           | 403133402 | ,000             | ,000 |
|                           | 403133550 | ,000             | ,000 |
|                           | 403133772 | ,000             | ,000 |
|                           | 403135803 | ,000             | ,000 |
|                           | 404060001 | ,000             | ,000 |
|                           | 404060002 | ,000             | ,000 |
|                           | 404310003 | ,000             | ,000 |
|                           | 404310004 | ,000             | ,000 |

1  
2  
3  
4  
5  
6  
7  
8  
9  
10  
11  
12  
13  
14  
15  
16  
17  
18  
19  
20  
21  
22  
23  
24  
25  
26  
27  
28  
29  
30  
31  
32  
33  
34  
35  
36  
37  
38  
39  
40  
41  
42  
43  
44  
45  
46  
47  
48  
49  
50  
51  
52  
53  
54  
55  
56  
57  
58  
59  
60

**Categorical Variables Codings**

|                           |           | Parameter coding |      |
|---------------------------|-----------|------------------|------|
|                           |           | (34)             | (35) |
| VASTY2 (SAIR*10000)+VASTY | 403073101 | ,000             | ,000 |
|                           | 403073102 | ,000             | ,000 |
|                           | 403073103 | ,000             | ,000 |
|                           | 403073202 | ,000             | ,000 |
|                           | 403073203 | ,000             | ,000 |
|                           | 403073204 | ,000             | ,000 |
|                           | 403073303 | ,000             | ,000 |
|                           | 403073651 | ,000             | ,000 |
|                           | 403073771 | ,000             | ,000 |
|                           | 403133102 | ,000             | ,000 |
|                           | 403133106 | ,000             | ,000 |
|                           | 403133107 | ,000             | ,000 |
|                           | 403133109 | ,000             | ,000 |
|                           | 403133202 | ,000             | ,000 |
|                           | 403133203 | ,000             | ,000 |
|                           | 403133204 | ,000             | ,000 |
|                           | 403133315 | ,000             | ,000 |
|                           | 403133322 | ,000             | ,000 |
|                           | 403133401 | ,000             | ,000 |
|                           | 403133402 | ,000             | ,000 |
|                           | 403133550 | ,000             | ,000 |
|                           | 403133772 | ,000             | ,000 |
|                           | 403135803 | ,000             | ,000 |
|                           | 404060001 | ,000             | ,000 |
|                           | 404060002 | ,000             | ,000 |
|                           | 404310003 | ,000             | ,000 |
|                           | 404310004 | ,000             | ,000 |

## Categorical Variables Codings

|                              |                                         | Frequency | Parameter<br>(1) |
|------------------------------|-----------------------------------------|-----------|------------------|
|                              | 502300005                               | 366       | ,000             |
|                              | 502300006                               | 225       | ,000             |
|                              | 502300007                               | 366       | ,000             |
|                              | 502300214                               | 366       | ,000             |
|                              | 502300411                               | 366       | ,000             |
|                              | 502300415                               | 360       | ,000             |
|                              | 502300416                               | 363       | ,000             |
|                              | 502300811                               | 364       | ,000             |
|                              | 502300913                               | 315       | ,000             |
| weekday veckodag             | 1 måndag                                | 1805      | ,000             |
|                              | 2 tisdag                                | 1812      | 1,000            |
|                              | 3 onsdag                                | 1800      | ,000             |
|                              | 4 torsdag                               | 1794      | ,000             |
|                              | 5 fredag                                | 1788      | ,000             |
|                              | 6 lördag                                | 1735      | ,000             |
|                              | 7 söndag                                | 1741      | ,000             |
| sv7 sjättedelar för standard | 1 fjärde sjundedelen                    | 1423      | ,000             |
|                              | 2 första sjundedelen                    | 3031      | 1,000            |
|                              | 3 andra sjundedelen                     | 1238      | ,000             |
|                              | 4 tredje sjundedelen                    | 1255      | ,000             |
|                              | 5 femte sjundedelen                     | 1445      | ,000             |
|                              | 6 sjätte sjundedelen                    | 1948      | ,000             |
|                              | 7 sjunde sjundedelen                    | 2135      | ,000             |
| season säsong/period         | 1 januari-mars                          | 3182      | ,000             |
|                              | 2 april-maj                             | 2127      | 1,000            |
|                              | 3 juni-augusti                          | 2911      | ,000             |
|                              | 4 september-oktober                     | 2144      | ,000             |
|                              | 5 november-december                     | 2111      | ,000             |
| holiday större helg          | 1 ingen större helg                     | 12078     | ,000             |
|                              | 2 större helg (påsk/midsommar/julonyår) | 397       | 1,000            |

## Categorical Variables Codings

|                              |                                         | Parameter coding |       |
|------------------------------|-----------------------------------------|------------------|-------|
|                              |                                         | (2)              | (3)   |
|                              | 502300005                               | ,000             | ,000  |
|                              | 502300006                               | ,000             | ,000  |
|                              | 502300007                               | ,000             | ,000  |
|                              | 502300214                               | ,000             | ,000  |
|                              | 502300411                               | ,000             | ,000  |
|                              | 502300415                               | ,000             | ,000  |
|                              | 502300416                               | ,000             | ,000  |
|                              | 502300811                               | ,000             | ,000  |
|                              | 502300913                               | ,000             | ,000  |
| weekday veckodag             | 1 måndag                                | ,000             | ,000  |
|                              | 2 tisdag                                | ,000             | ,000  |
|                              | 3 onsdag                                | 1,000            | ,000  |
|                              | 4 torsdag                               | ,000             | 1,000 |
|                              | 5 fredag                                | ,000             | ,000  |
|                              | 6 lördag                                | ,000             | ,000  |
|                              | 7 söndag                                | ,000             | ,000  |
| sv7 sjättedelar för standard | 1 fjärde sjundedelen                    | ,000             | ,000  |
|                              | 2 första sjundedelen                    | ,000             | ,000  |
|                              | 3 andra sjundedelen                     | 1,000            | ,000  |
|                              | 4 tredje sjundedelen                    | ,000             | 1,000 |
|                              | 5 femte sjundedelen                     | ,000             | ,000  |
|                              | 6 sjätte sjundedelen                    | ,000             | ,000  |
|                              | 7 sjunde sjundedelen                    | ,000             | ,000  |
| season säsong/period         | 1 januari-mars                          | ,000             | ,000  |
|                              | 2 april-maj                             | ,000             | ,000  |
|                              | 3 juni-augusti                          | 1,000            | ,000  |
|                              | 4 september-oktober                     | ,000             | 1,000 |
|                              | 5 november-december                     | ,000             | ,000  |
| holiday större helg          | 1 ingen större helg                     |                  |       |
|                              | 2 större helg (påsk/midsommar/julonyår) |                  |       |

## Categorical Variables Codings

|                              |                                         | Parameter coding |       |
|------------------------------|-----------------------------------------|------------------|-------|
|                              |                                         | (4)              | (5)   |
|                              | 502300005                               | ,000             | ,000  |
|                              | 502300006                               | ,000             | ,000  |
|                              | 502300007                               | ,000             | ,000  |
|                              | 502300214                               | ,000             | ,000  |
|                              | 502300411                               | ,000             | ,000  |
|                              | 502300415                               | ,000             | ,000  |
|                              | 502300416                               | ,000             | ,000  |
|                              | 502300811                               | ,000             | ,000  |
|                              | 502300913                               | ,000             | ,000  |
| weekday veckodag             | 1 måndag                                | ,000             | ,000  |
|                              | 2 tisdag                                | ,000             | ,000  |
|                              | 3 onsdag                                | ,000             | ,000  |
|                              | 4 torsdag                               | ,000             | ,000  |
|                              | 5 fredag                                | 1,000            | ,000  |
|                              | 6 lördag                                | ,000             | 1,000 |
|                              | 7 söndag                                | ,000             | ,000  |
| sv7 sjättedelar för standard | 1 fjärde sjundedelen                    | ,000             | ,000  |
|                              | 2 första sjundedelen                    | ,000             | ,000  |
|                              | 3 andra sjundedelen                     | ,000             | ,000  |
|                              | 4 tredje sjundedelen                    | ,000             | ,000  |
|                              | 5 femte sjundedelen                     | 1,000            | ,000  |
|                              | 6 sjätte sjundedelen                    | ,000             | 1,000 |
|                              | 7 sjunde sjundedelen                    | ,000             | ,000  |
| season säsong/period         | 1 januari-mars                          | ,000             |       |
|                              | 2 april-maj                             | ,000             |       |
|                              | 3 juni-augusti                          | ,000             |       |
|                              | 4 september-oktober                     | ,000             |       |
|                              | 5 november-december                     | 1,000            |       |
| holiday större helg          | 1 ingen större helg                     |                  |       |
|                              | 2 större helg (påsk/midsommar/julonyår) |                  |       |

## Categorical Variables Codings

|                              |                                         | Parameter coding |      |
|------------------------------|-----------------------------------------|------------------|------|
|                              |                                         | (6)              | (7)  |
|                              | 502300005                               | ,000             | ,000 |
|                              | 502300006                               | ,000             | ,000 |
|                              | 502300007                               | ,000             | ,000 |
|                              | 502300214                               | ,000             | ,000 |
|                              | 502300411                               | ,000             | ,000 |
|                              | 502300415                               | ,000             | ,000 |
|                              | 502300416                               | ,000             | ,000 |
|                              | 502300811                               | ,000             | ,000 |
|                              | 502300913                               | ,000             | ,000 |
| weekday veckodag             | 1 måndag                                | ,000             |      |
|                              | 2 tisdag                                | ,000             |      |
|                              | 3 onsdag                                | ,000             |      |
|                              | 4 torsdag                               | ,000             |      |
|                              | 5 fredag                                | ,000             |      |
|                              | 6 lördag                                | ,000             |      |
|                              | 7 söndag                                | 1,000            |      |
| sv7 sjättedelar för standard | 1 fjärde sjundedelen                    | ,000             |      |
|                              | 2 första sjundedelen                    | ,000             |      |
|                              | 3 andra sjundedelen                     | ,000             |      |
|                              | 4 tredje sjundedelen                    | ,000             |      |
|                              | 5 femte sjundedelen                     | ,000             |      |
|                              | 6 sjätte sjundedelen                    | ,000             |      |
|                              | 7 sjunde sjundedelen                    | 1,000            |      |
| season säsong/period         | 1 januari-mars                          |                  |      |
|                              | 2 april-maj                             |                  |      |
|                              | 3 juni-augusti                          |                  |      |
|                              | 4 september-oktober                     |                  |      |
|                              | 5 november-december                     |                  |      |
| holiday större helg          | 1 ingen större helg                     |                  |      |
|                              | 2 större helg (påsk/midsommar/julonyår) |                  |      |

## Categorical Variables Codings

|                              |                                         | Parameter coding |      |
|------------------------------|-----------------------------------------|------------------|------|
|                              |                                         | (8)              | (9)  |
|                              | 502300005                               | ,000             | ,000 |
|                              | 502300006                               | ,000             | ,000 |
|                              | 502300007                               | ,000             | ,000 |
|                              | 502300214                               | ,000             | ,000 |
|                              | 502300411                               | ,000             | ,000 |
|                              | 502300415                               | ,000             | ,000 |
|                              | 502300416                               | ,000             | ,000 |
|                              | 502300811                               | ,000             | ,000 |
|                              | 502300913                               | ,000             | ,000 |
| weekday veckodag             | 1 måndag                                |                  |      |
|                              | 2 tisdag                                |                  |      |
|                              | 3 onsdag                                |                  |      |
|                              | 4 torsdag                               |                  |      |
|                              | 5 fredag                                |                  |      |
|                              | 6 lördag                                |                  |      |
|                              | 7 söndag                                |                  |      |
| sv7 sjättedelar för standard | 1 fjärde sjundedelen                    |                  |      |
|                              | 2 första sjundedelen                    |                  |      |
|                              | 3 andra sjundedelen                     |                  |      |
|                              | 4 tredje sjundedelen                    |                  |      |
|                              | 5 femte sjundedelen                     |                  |      |
|                              | 6 sjätte sjundedelen                    |                  |      |
|                              | 7 sjunde sjundedelen                    |                  |      |
| season säsong/period         | 1 januari-mars                          |                  |      |
|                              | 2 april-maj                             |                  |      |
|                              | 3 juni-augusti                          |                  |      |
|                              | 4 september-oktober                     |                  |      |
|                              | 5 november-december                     |                  |      |
| holiday större helg          | 1 ingen större helg                     |                  |      |
|                              | 2 större helg (påsk/midsommar/julonyår) |                  |      |



## Categorical Variables Codings

|                              |                                         | Parameter coding |      |
|------------------------------|-----------------------------------------|------------------|------|
|                              |                                         | (10)             | (11) |
|                              | 502300005                               | ,000             | ,000 |
|                              | 502300006                               | ,000             | ,000 |
|                              | 502300007                               | ,000             | ,000 |
|                              | 502300214                               | ,000             | ,000 |
|                              | 502300411                               | ,000             | ,000 |
|                              | 502300415                               | ,000             | ,000 |
|                              | 502300416                               | ,000             | ,000 |
|                              | 502300811                               | ,000             | ,000 |
|                              | 502300913                               | ,000             | ,000 |
| weekday veckodag             | 1 måndag                                |                  |      |
|                              | 2 tisdag                                |                  |      |
|                              | 3 onsdag                                |                  |      |
|                              | 4 torsdag                               |                  |      |
|                              | 5 fredag                                |                  |      |
|                              | 6 lördag                                |                  |      |
|                              | 7 söndag                                |                  |      |
| sv7 sjättedelar för standard | 1 fjärde sjundedelen                    |                  |      |
|                              | 2 första sjundedelen                    |                  |      |
|                              | 3 andra sjundedelen                     |                  |      |
|                              | 4 tredje sjundedelen                    |                  |      |
|                              | 5 femte sjundedelen                     |                  |      |
|                              | 6 sjätte sjundedelen                    |                  |      |
|                              | 7 sjunde sjundedelen                    |                  |      |
| season säsong/period         | 1 januari-mars                          |                  |      |
|                              | 2 april-maj                             |                  |      |
|                              | 3 juni-augusti                          |                  |      |
|                              | 4 september-oktober                     |                  |      |
|                              | 5 november-december                     |                  |      |
| holiday större helg          | 1 ingen större helg                     |                  |      |
|                              | 2 större helg (påsk/midsommar/julonyår) |                  |      |

## Categorical Variables Codings

|                              |                                         | Parameter coding |      |
|------------------------------|-----------------------------------------|------------------|------|
|                              |                                         | (12)             | (13) |
|                              | 502300005                               | ,000             | ,000 |
|                              | 502300006                               | ,000             | ,000 |
|                              | 502300007                               | ,000             | ,000 |
|                              | 502300214                               | ,000             | ,000 |
|                              | 502300411                               | ,000             | ,000 |
|                              | 502300415                               | ,000             | ,000 |
|                              | 502300416                               | ,000             | ,000 |
|                              | 502300811                               | ,000             | ,000 |
|                              | 502300913                               | ,000             | ,000 |
| weekday veckodag             | 1 måndag                                |                  |      |
|                              | 2 tisdag                                |                  |      |
|                              | 3 onsdag                                |                  |      |
|                              | 4 torsdag                               |                  |      |
|                              | 5 fredag                                |                  |      |
|                              | 6 lördag                                |                  |      |
|                              | 7 söndag                                |                  |      |
| sv7 sjättedelar för standard | 1 fjärde sjundedelen                    |                  |      |
|                              | 2 första sjundedelen                    |                  |      |
|                              | 3 andra sjundedelen                     |                  |      |
|                              | 4 tredje sjundedelen                    |                  |      |
|                              | 5 femte sjundedelen                     |                  |      |
|                              | 6 sjätte sjundedelen                    |                  |      |
|                              | 7 sjunde sjundedelen                    |                  |      |
| season säsong/period         | 1 januari-mars                          |                  |      |
|                              | 2 april-maj                             |                  |      |
|                              | 3 juni-augusti                          |                  |      |
|                              | 4 september-oktober                     |                  |      |
|                              | 5 november-december                     |                  |      |
| holiday större helg          | 1 ingen större helg                     |                  |      |
|                              | 2 större helg (påsk/midsommar/julonyår) |                  |      |

## Categorical Variables Codings

|                              |                                         | Parameter coding |      |
|------------------------------|-----------------------------------------|------------------|------|
|                              |                                         | (14)             | (15) |
|                              | 502300005                               | ,000             | ,000 |
|                              | 502300006                               | ,000             | ,000 |
|                              | 502300007                               | ,000             | ,000 |
|                              | 502300214                               | ,000             | ,000 |
|                              | 502300411                               | ,000             | ,000 |
|                              | 502300415                               | ,000             | ,000 |
|                              | 502300416                               | ,000             | ,000 |
|                              | 502300811                               | ,000             | ,000 |
|                              | 502300913                               | ,000             | ,000 |
| weekday veckodag             | 1 måndag                                |                  |      |
|                              | 2 tisdag                                |                  |      |
|                              | 3 onsdag                                |                  |      |
|                              | 4 torsdag                               |                  |      |
|                              | 5 fredag                                |                  |      |
|                              | 6 lördag                                |                  |      |
|                              | 7 söndag                                |                  |      |
| sv7 sjättedelar för standard | 1 fjärde sjundedelen                    |                  |      |
|                              | 2 första sjundedelen                    |                  |      |
|                              | 3 andra sjundedelen                     |                  |      |
|                              | 4 tredje sjundedelen                    |                  |      |
|                              | 5 femte sjundedelen                     |                  |      |
|                              | 6 sjätte sjundedelen                    |                  |      |
|                              | 7 sjunde sjundedelen                    |                  |      |
| season säsong/period         | 1 januari-mars                          |                  |      |
|                              | 2 april-maj                             |                  |      |
|                              | 3 juni-augusti                          |                  |      |
|                              | 4 september-oktober                     |                  |      |
|                              | 5 november-december                     |                  |      |
| holiday större helg          | 1 ingen större helg                     |                  |      |
|                              | 2 större helg (påsk/midsommar/julonyår) |                  |      |

## Categorical Variables Codings

|                              |                                         | Parameter coding |      |
|------------------------------|-----------------------------------------|------------------|------|
|                              |                                         | (16)             | (17) |
|                              | 502300005                               | ,000             | ,000 |
|                              | 502300006                               | ,000             | ,000 |
|                              | 502300007                               | ,000             | ,000 |
|                              | 502300214                               | ,000             | ,000 |
|                              | 502300411                               | ,000             | ,000 |
|                              | 502300415                               | ,000             | ,000 |
|                              | 502300416                               | ,000             | ,000 |
|                              | 502300811                               | ,000             | ,000 |
|                              | 502300913                               | ,000             | ,000 |
| weekday veckodag             | 1 måndag                                |                  |      |
|                              | 2 tisdag                                |                  |      |
|                              | 3 onsdag                                |                  |      |
|                              | 4 torsdag                               |                  |      |
|                              | 5 fredag                                |                  |      |
|                              | 6 lördag                                |                  |      |
|                              | 7 söndag                                |                  |      |
| sv7 sjättedelar för standard | 1 fjärde sjundedelen                    |                  |      |
|                              | 2 första sjundedelen                    |                  |      |
|                              | 3 andra sjundedelen                     |                  |      |
|                              | 4 tredje sjundedelen                    |                  |      |
|                              | 5 femte sjundedelen                     |                  |      |
|                              | 6 sjätte sjundedelen                    |                  |      |
|                              | 7 sjunde sjundedelen                    |                  |      |
| season säsong/period         | 1 januari-mars                          |                  |      |
|                              | 2 april-maj                             |                  |      |
|                              | 3 juni-augusti                          |                  |      |
|                              | 4 september-oktober                     |                  |      |
|                              | 5 november-december                     |                  |      |
| holiday större helg          | 1 ingen större helg                     |                  |      |
|                              | 2 större helg (påsk/midsommar/julonyår) |                  |      |

## Categorical Variables Codings

|                              |                                         | Parameter coding |      |
|------------------------------|-----------------------------------------|------------------|------|
|                              |                                         | (18)             | (19) |
|                              | 502300005                               | ,000             | ,000 |
|                              | 502300006                               | ,000             | ,000 |
|                              | 502300007                               | ,000             | ,000 |
|                              | 502300214                               | ,000             | ,000 |
|                              | 502300411                               | ,000             | ,000 |
|                              | 502300415                               | ,000             | ,000 |
|                              | 502300416                               | ,000             | ,000 |
|                              | 502300811                               | ,000             | ,000 |
|                              | 502300913                               | ,000             | ,000 |
| weekday veckodag             | 1 måndag                                |                  |      |
|                              | 2 tisdag                                |                  |      |
|                              | 3 onsdag                                |                  |      |
|                              | 4 torsdag                               |                  |      |
|                              | 5 fredag                                |                  |      |
|                              | 6 lördag                                |                  |      |
|                              | 7 söndag                                |                  |      |
| sv7 sjättedelar för standard | 1 fjärde sjundedelen                    |                  |      |
|                              | 2 första sjundedelen                    |                  |      |
|                              | 3 andra sjundedelen                     |                  |      |
|                              | 4 tredje sjundedelen                    |                  |      |
|                              | 5 femte sjundedelen                     |                  |      |
|                              | 6 sjätte sjundedelen                    |                  |      |
|                              | 7 sjunde sjundedelen                    |                  |      |
| season säsong/period         | 1 januari-mars                          |                  |      |
|                              | 2 april-maj                             |                  |      |
|                              | 3 juni-augusti                          |                  |      |
|                              | 4 september-oktober                     |                  |      |
|                              | 5 november-december                     |                  |      |
| holiday större helg          | 1 ingen större helg                     |                  |      |
|                              | 2 större helg (påsk/midsommar/julonyår) |                  |      |

## Categorical Variables Codings

|                              |                                         | Parameter coding |      |
|------------------------------|-----------------------------------------|------------------|------|
|                              |                                         | (20)             | (21) |
|                              | 502300005                               | ,000             | ,000 |
|                              | 502300006                               | ,000             | ,000 |
|                              | 502300007                               | ,000             | ,000 |
|                              | 502300214                               | ,000             | ,000 |
|                              | 502300411                               | ,000             | ,000 |
|                              | 502300415                               | ,000             | ,000 |
|                              | 502300416                               | ,000             | ,000 |
|                              | 502300811                               | ,000             | ,000 |
|                              | 502300913                               | ,000             | ,000 |
| weekday veckodag             | 1 måndag                                |                  |      |
|                              | 2 tisdag                                |                  |      |
|                              | 3 onsdag                                |                  |      |
|                              | 4 torsdag                               |                  |      |
|                              | 5 fredag                                |                  |      |
|                              | 6 lördag                                |                  |      |
|                              | 7 söndag                                |                  |      |
| sv7 sjättedelar för standard | 1 fjärde sjundedelen                    |                  |      |
|                              | 2 första sjundedelen                    |                  |      |
|                              | 3 andra sjundedelen                     |                  |      |
|                              | 4 tredje sjundedelen                    |                  |      |
|                              | 5 femte sjundedelen                     |                  |      |
|                              | 6 sjätte sjundedelen                    |                  |      |
|                              | 7 sjunde sjundedelen                    |                  |      |
| season säsong/period         | 1 januari-mars                          |                  |      |
|                              | 2 april-maj                             |                  |      |
|                              | 3 juni-augusti                          |                  |      |
|                              | 4 september-oktober                     |                  |      |
|                              | 5 november-december                     |                  |      |
| holiday större helg          | 1 ingen större helg                     |                  |      |
|                              | 2 större helg (påsk/midsommar/julonyår) |                  |      |

## Categorical Variables Codings

|                              |                                         | Parameter coding |      |
|------------------------------|-----------------------------------------|------------------|------|
|                              |                                         | (22)             | (23) |
|                              | 502300005                               | ,000             | ,000 |
|                              | 502300006                               | ,000             | ,000 |
|                              | 502300007                               | ,000             | ,000 |
|                              | 502300214                               | ,000             | ,000 |
|                              | 502300411                               | ,000             | ,000 |
|                              | 502300415                               | ,000             | ,000 |
|                              | 502300416                               | ,000             | ,000 |
|                              | 502300811                               | ,000             | ,000 |
|                              | 502300913                               | ,000             | ,000 |
| weekday veckodag             | 1 måndag                                |                  |      |
|                              | 2 tisdag                                |                  |      |
|                              | 3 onsdag                                |                  |      |
|                              | 4 torsdag                               |                  |      |
|                              | 5 fredag                                |                  |      |
|                              | 6 lördag                                |                  |      |
|                              | 7 söndag                                |                  |      |
| sv7 sjättedelar för standard | 1 fjärde sjundedelen                    |                  |      |
|                              | 2 första sjundedelen                    |                  |      |
|                              | 3 andra sjundedelen                     |                  |      |
|                              | 4 tredje sjundedelen                    |                  |      |
|                              | 5 femte sjundedelen                     |                  |      |
|                              | 6 sjätte sjundedelen                    |                  |      |
|                              | 7 sjunde sjundedelen                    |                  |      |
| season säsong/period         | 1 januari-mars                          |                  |      |
|                              | 2 april-maj                             |                  |      |
|                              | 3 juni-augusti                          |                  |      |
|                              | 4 september-oktober                     |                  |      |
|                              | 5 november-december                     |                  |      |
| holiday större helg          | 1 ingen större helg                     |                  |      |
|                              | 2 större helg (påsk/midsommar/julonyår) |                  |      |

## Categorical Variables Codings

|                              |                                         | Parameter coding |      |
|------------------------------|-----------------------------------------|------------------|------|
|                              |                                         | (24)             | (25) |
|                              | 502300005                               | ,000             | ,000 |
|                              | 502300006                               | ,000             | ,000 |
|                              | 502300007                               | ,000             | ,000 |
|                              | 502300214                               | ,000             | ,000 |
|                              | 502300411                               | ,000             | ,000 |
|                              | 502300415                               | ,000             | ,000 |
|                              | 502300416                               | ,000             | ,000 |
|                              | 502300811                               | ,000             | ,000 |
|                              | 502300913                               | ,000             | ,000 |
| weekday veckodag             | 1 måndag                                |                  |      |
|                              | 2 tisdag                                |                  |      |
|                              | 3 onsdag                                |                  |      |
|                              | 4 torsdag                               |                  |      |
|                              | 5 fredag                                |                  |      |
|                              | 6 lördag                                |                  |      |
|                              | 7 söndag                                |                  |      |
| sv7 sjättedelar för standard | 1 fjärde sjundedelen                    |                  |      |
|                              | 2 första sjundedelen                    |                  |      |
|                              | 3 andra sjundedelen                     |                  |      |
|                              | 4 tredje sjundedelen                    |                  |      |
|                              | 5 femte sjundedelen                     |                  |      |
|                              | 6 sjätte sjundedelen                    |                  |      |
|                              | 7 sjunde sjundedelen                    |                  |      |
| season säsong/period         | 1 januari-mars                          |                  |      |
|                              | 2 april-maj                             |                  |      |
|                              | 3 juni-augusti                          |                  |      |
|                              | 4 september-oktober                     |                  |      |
|                              | 5 november-december                     |                  |      |
| holiday större helg          | 1 ingen större helg                     |                  |      |
|                              | 2 större helg (påsk/midsommar/julonyår) |                  |      |



## Categorical Variables Codings

|                              |                                         | Parameter coding |       |
|------------------------------|-----------------------------------------|------------------|-------|
|                              |                                         | (26)             | (27)  |
|                              | 502300005                               | ,000             | 1,000 |
|                              | 502300006                               | ,000             | ,000  |
|                              | 502300007                               | ,000             | ,000  |
|                              | 502300214                               | ,000             | ,000  |
|                              | 502300411                               | ,000             | ,000  |
|                              | 502300415                               | ,000             | ,000  |
|                              | 502300416                               | ,000             | ,000  |
|                              | 502300811                               | ,000             | ,000  |
|                              | 502300913                               | ,000             | ,000  |
| weekday veckodag             | 1 måndag                                |                  |       |
|                              | 2 tisdag                                |                  |       |
|                              | 3 onsdag                                |                  |       |
|                              | 4 torsdag                               |                  |       |
|                              | 5 fredag                                |                  |       |
|                              | 6 lördag                                |                  |       |
|                              | 7 söndag                                |                  |       |
| sv7 sjättedelar för standard | 1 fjärde sjundedelen                    |                  |       |
|                              | 2 första sjundedelen                    |                  |       |
|                              | 3 andra sjundedelen                     |                  |       |
|                              | 4 tredje sjundedelen                    |                  |       |
|                              | 5 femte sjundedelen                     |                  |       |
|                              | 6 sjätte sjundedelen                    |                  |       |
|                              | 7 sjunde sjundedelen                    |                  |       |
| season säsong/period         | 1 januari-mars                          |                  |       |
|                              | 2 april-maj                             |                  |       |
|                              | 3 juni-augusti                          |                  |       |
|                              | 4 september-oktober                     |                  |       |
|                              | 5 november-december                     |                  |       |
| holiday större helg          | 1 ingen större helg                     |                  |       |
|                              | 2 större helg (påsk/midsommar/julonyår) |                  |       |

## Categorical Variables Codings

|                              |                                         | Parameter coding |       |
|------------------------------|-----------------------------------------|------------------|-------|
|                              |                                         | (28)             | (29)  |
|                              | 502300005                               | ,000             | ,000  |
|                              | 502300006                               | 1,000            | ,000  |
|                              | 502300007                               | ,000             | 1,000 |
|                              | 502300214                               | ,000             | ,000  |
|                              | 502300411                               | ,000             | ,000  |
|                              | 502300415                               | ,000             | ,000  |
|                              | 502300416                               | ,000             | ,000  |
|                              | 502300811                               | ,000             | ,000  |
|                              | 502300913                               | ,000             | ,000  |
| weekday veckodag             | 1 måndag                                |                  |       |
|                              | 2 tisdag                                |                  |       |
|                              | 3 onsdag                                |                  |       |
|                              | 4 torsdag                               |                  |       |
|                              | 5 fredag                                |                  |       |
|                              | 6 lördag                                |                  |       |
|                              | 7 söndag                                |                  |       |
| sv7 sjättedelar för standard | 1 fjärde sjundedelen                    |                  |       |
|                              | 2 första sjundedelen                    |                  |       |
|                              | 3 andra sjundedelen                     |                  |       |
|                              | 4 tredje sjundedelen                    |                  |       |
|                              | 5 femte sjundedelen                     |                  |       |
|                              | 6 sjätte sjundedelen                    |                  |       |
|                              | 7 sjunde sjundedelen                    |                  |       |
| season säsong/period         | 1 januari-mars                          |                  |       |
|                              | 2 april-maj                             |                  |       |
|                              | 3 juni-augusti                          |                  |       |
|                              | 4 september-oktober                     |                  |       |
|                              | 5 november-december                     |                  |       |
| holiday större helg          | 1 ingen större helg                     |                  |       |
|                              | 2 större helg (påsk/midsommar/julonyår) |                  |       |

## Categorical Variables Codings

|                              |                                         | Parameter coding |       |
|------------------------------|-----------------------------------------|------------------|-------|
|                              |                                         | (30)             | (31)  |
|                              | 502300005                               | ,000             | ,000  |
|                              | 502300006                               | ,000             | ,000  |
|                              | 502300007                               | ,000             | ,000  |
|                              | 502300214                               | 1,000            | ,000  |
|                              | 502300411                               | ,000             | 1,000 |
|                              | 502300415                               | ,000             | ,000  |
|                              | 502300416                               | ,000             | ,000  |
|                              | 502300811                               | ,000             | ,000  |
|                              | 502300913                               | ,000             | ,000  |
| weekday veckodag             | 1 måndag                                |                  |       |
|                              | 2 tisdag                                |                  |       |
|                              | 3 onsdag                                |                  |       |
|                              | 4 torsdag                               |                  |       |
|                              | 5 fredag                                |                  |       |
|                              | 6 lördag                                |                  |       |
|                              | 7 söndag                                |                  |       |
| sv7 sjättedelar för standard | 1 fjärde sjundedelen                    |                  |       |
|                              | 2 första sjundedelen                    |                  |       |
|                              | 3 andra sjundedelen                     |                  |       |
|                              | 4 tredje sjundedelen                    |                  |       |
|                              | 5 femte sjundedelen                     |                  |       |
|                              | 6 sjätte sjundedelen                    |                  |       |
|                              | 7 sjunde sjundedelen                    |                  |       |
| season säsong/period         | 1 januari-mars                          |                  |       |
|                              | 2 april-maj                             |                  |       |
|                              | 3 juni-augusti                          |                  |       |
|                              | 4 september-oktober                     |                  |       |
|                              | 5 november-december                     |                  |       |
| holiday större helg          | 1 ingen större helg                     |                  |       |
|                              | 2 större helg (påsk/midsommar/julonyår) |                  |       |

## Categorical Variables Codings

|                              |                                         | Parameter coding |       |
|------------------------------|-----------------------------------------|------------------|-------|
|                              |                                         | (32)             | (33)  |
|                              | 502300005                               | ,000             | ,000  |
|                              | 502300006                               | ,000             | ,000  |
|                              | 502300007                               | ,000             | ,000  |
|                              | 502300214                               | ,000             | ,000  |
|                              | 502300411                               | ,000             | ,000  |
|                              | 502300415                               | 1,000            | ,000  |
|                              | 502300416                               | ,000             | 1,000 |
|                              | 502300811                               | ,000             | ,000  |
|                              | 502300913                               | ,000             | ,000  |
| weekday veckodag             | 1 måndag                                |                  |       |
|                              | 2 tisdag                                |                  |       |
|                              | 3 onsdag                                |                  |       |
|                              | 4 torsdag                               |                  |       |
|                              | 5 fredag                                |                  |       |
|                              | 6 lördag                                |                  |       |
|                              | 7 söndag                                |                  |       |
| sv7 sjättedelar för standard | 1 fjärde sjundedelen                    |                  |       |
|                              | 2 första sjundedelen                    |                  |       |
|                              | 3 andra sjundedelen                     |                  |       |
|                              | 4 tredje sjundedelen                    |                  |       |
|                              | 5 femte sjundedelen                     |                  |       |
|                              | 6 sjätte sjundedelen                    |                  |       |
|                              | 7 sjunde sjundedelen                    |                  |       |
| season säsong/period         | 1 januari-mars                          |                  |       |
|                              | 2 april-maj                             |                  |       |
|                              | 3 juni-augusti                          |                  |       |
|                              | 4 september-oktober                     |                  |       |
|                              | 5 november-december                     |                  |       |
| holiday större helg          | 1 ingen större helg                     |                  |       |
|                              | 2 större helg (påsk/midsommar/julonyår) |                  |       |

## Categorical Variables Codings

|                              |                                         | Parameter coding |       |
|------------------------------|-----------------------------------------|------------------|-------|
|                              |                                         | (34)             | (35)  |
|                              | 502300005                               | ,000             | ,000  |
|                              | 502300006                               | ,000             | ,000  |
|                              | 502300007                               | ,000             | ,000  |
|                              | 502300214                               | ,000             | ,000  |
|                              | 502300411                               | ,000             | ,000  |
|                              | 502300415                               | ,000             | ,000  |
|                              | 502300416                               | ,000             | ,000  |
|                              | 502300811                               | 1,000            | ,000  |
|                              | 502300913                               | ,000             | 1,000 |
| weekday veckodag             | 1 måndag                                |                  |       |
|                              | 2 tisdag                                |                  |       |
|                              | 3 onsdag                                |                  |       |
|                              | 4 torsdag                               |                  |       |
|                              | 5 fredag                                |                  |       |
|                              | 6 lördag                                |                  |       |
|                              | 7 söndag                                |                  |       |
| sv7 sjättedelar för standard | 1 fjärde sjundedelen                    |                  |       |
|                              | 2 första sjundedelen                    |                  |       |
|                              | 3 andra sjundedelen                     |                  |       |
|                              | 4 tredje sjundedelen                    |                  |       |
|                              | 5 femte sjundedelen                     |                  |       |
|                              | 6 sjätte sjundedelen                    |                  |       |
|                              | 7 sjunde sjundedelen                    |                  |       |
| season säsong/period         | 1 januari-mars                          |                  |       |
|                              | 2 april-maj                             |                  |       |
|                              | 3 juni-augusti                          |                  |       |
|                              | 4 september-oktober                     |                  |       |
|                              | 5 november-december                     |                  |       |
| holiday större helg          | 1 ingen större helg                     |                  |       |
|                              | 2 större helg (påsk/midsommar/julonyår) |                  |       |

**Block 0: Beginning Block**

Classification Table<sup>a,b</sup>

| Observed           |                             |                      | Predicted                   |                      |
|--------------------|-----------------------------|----------------------|-----------------------------|----------------------|
|                    |                             |                      | dod01 dödsfall ja eller nej |                      |
|                    |                             |                      | 0 inget dödsfall            | 1 minst ett dödsfall |
| Step 0             | dod01 dödsfall ja eller nej | 0 inget dödsfall     | 11839                       | 0                    |
|                    |                             | 1 minst ett dödsfall | 636                         | 0                    |
| Overall Percentage |                             |                      |                             |                      |

Classification Table<sup>a,b</sup>

| Observed           |                             |                      | Predicted          |
|--------------------|-----------------------------|----------------------|--------------------|
|                    |                             |                      | Percentage Correct |
| Step 0             | dod01 dödsfall ja eller nej | 0 inget dödsfall     | 100,0              |
|                    |                             | 1 minst ett dödsfall | ,0                 |
| Overall Percentage |                             |                      | 94,9               |

a. Constant is included in the model.

b. The cut value is ,500

Variables in the Equation

|                 | B      | S.E. | Wald     | df | Sig. | Exp(B) |
|-----------------|--------|------|----------|----|------|--------|
| Step 0 Constant | -2,924 | ,041 | 5160,279 | 1  | ,000 | ,054   |

## Variables not in the Equation

|        |           |            | Score   | df | Sig. |
|--------|-----------|------------|---------|----|------|
| Step 0 | Variables | sv7        | 110,455 | 6  | ,000 |
|        |           | sv7(1)     | 94,684  | 1  | ,000 |
|        |           | sv7(2)     | 2,196   | 1  | ,138 |
|        |           | sv7(3)     | 1,177   | 1  | ,278 |
|        |           | sv7(4)     | 14,883  | 1  | ,000 |
|        |           | sv7(5)     | 23,997  | 1  | ,000 |
|        |           | sv7(6)     | ,095    | 1  | ,758 |
|        |           | VASTY2     | 635,545 | 35 | ,000 |
|        |           | VASTY2(1)  | 2,519   | 1  | ,113 |
|        |           | VASTY2(2)  | 6,299   | 1  | ,012 |
|        |           | VASTY2(3)  | 8,957   | 1  | ,003 |
|        |           | VASTY2(4)  | ,151    | 1  | ,698 |
|        |           | VASTY2(5)  | 7,537   | 1  | ,006 |
|        |           | VASTY2(6)  | 20,142  | 1  | ,000 |
|        |           | VASTY2(7)  | 127,387 | 1  | ,000 |
|        |           | VASTY2(8)  | 8,957   | 1  | ,003 |
|        |           | VASTY2(9)  | ,163    | 1  | ,687 |
|        |           | VASTY2(10) | 7,570   | 1  | ,006 |
|        |           | VASTY2(11) | ,113    | 1  | ,737 |
|        |           | VASTY2(12) | 47,021  | 1  | ,000 |
|        |           | VASTY2(13) | 90,515  | 1  | ,000 |
|        |           | VASTY2(14) | 7,570   | 1  | ,006 |
|        |           | VASTY2(15) | ,151    | 1  | ,698 |
|        |           | VASTY2(16) | 4,298   | 1  | ,038 |
|        |           | VASTY2(17) | 20,199  | 1  | ,000 |
|        |           | VASTY2(18) | 17,916  | 1  | ,000 |
|        |           | VASTY2(19) | 18,086  | 1  | ,000 |
|        |           | VASTY2(20) | 10,563  | 1  | ,001 |
|        |           | VASTY2(21) | 1,696   | 1  | ,193 |
|        |           | VASTY2(22) | 26,693  | 1  | ,000 |
|        |           | VASTY2(23) | 1,125   | 1  | ,289 |
|        |           | VASTY2(24) | 72,662  | 1  | ,000 |
|        |           | VASTY2(25) | 2,477   | 1  | ,116 |
|        |           | VASTY2(26) | 16,006  | 1  | ,000 |
|        |           | VASTY2(27) | 20,256  | 1  | ,000 |
|        |           | VASTY2(28) | 12,309  | 1  | ,000 |
|        |           | VASTY2(29) | 20,256  | 1  | ,000 |
|        |           | VASTY2(30) | 1,263   | 1  | ,261 |
|        |           | VASTY2(31) | 20,256  | 1  | ,000 |
|        |           | VASTY2(32) | 15,810  | 1  | ,000 |
|        |           | VASTY2(33) | 17,973  | 1  | ,000 |
|        |           | VASTY2(34) | ,693    | 1  | ,405 |
|        |           | VASTY2(35) | 17,360  | 1  | ,000 |

## Variables not in the Equation

|                    | Score   | df | Sig. |
|--------------------|---------|----|------|
| weekday            | 2,920   | 6  | ,819 |
| weekday(1)         | ,422    | 1  | ,516 |
| weekday(2)         | ,103    | 1  | ,749 |
| weekday(3)         | ,575    | 1  | ,448 |
| weekday(4)         | ,109    | 1  | ,741 |
| weekday(5)         | ,165    | 1  | ,685 |
| weekday(6)         | 1,908   | 1  | ,167 |
| holiday(1)         | ,270    | 1  | ,603 |
| season             | 9,040   | 4  | ,060 |
| season(1)          | ,504    | 1  | ,478 |
| season(2)          | 2,866   | 1  | ,090 |
| season(3)          | ,328    | 1  | ,567 |
| season(4)          | 7,145   | 1  | ,008 |
| Overall Statistics | 660,989 | 52 | ,000 |

## Block 1: Method = Enter

## Omnibus Tests of Model Coefficients

|             | Chi-square | df | Sig. |
|-------------|------------|----|------|
| Step 1 Step | 730,384    | 52 | ,000 |
| Block       | 730,384    | 52 | ,000 |
| Model       | 730,384    | 52 | ,000 |

## Model Summary

| Step | -2 Log likelihood     | Cox & Snell R Square | Nagelkerke R Square |
|------|-----------------------|----------------------|---------------------|
| 1    | 4294,459 <sup>a</sup> | ,057                 | ,172                |

a. Estimation terminated at iteration number 20 because maximum iterations has been reached. Final solution cannot be found.

Classification Table<sup>a</sup>

|                    |                             | Predicted        |                      |
|--------------------|-----------------------------|------------------|----------------------|
|                    |                             | 0 inget dödsfall | 1 minst ett dödsfall |
| Observed           | dod01 dödsfall ja eller nej | 11839            | 0                    |
|                    |                             | 636              | 0                    |
| Overall Percentage |                             |                  |                      |



Classification Table<sup>a</sup>

| Observed           |                             |                      | Predicted          |
|--------------------|-----------------------------|----------------------|--------------------|
|                    |                             |                      | Percentage Correct |
| Step 1             | dod01 dödsfall ja eller nej | 0 inget dödsfall     | 100,0              |
|                    |                             | 1 minst ett dödsfall | ,0                 |
| Overall Percentage |                             |                      | 94,9               |

a. The cut value is ,500

Variables in the Equation

|                         | B       | S.E.     | Wald    | df | Sig. | Exp(B) |
|-------------------------|---------|----------|---------|----|------|--------|
| Step 1 <sup>a</sup> sv7 |         |          | 13,534  | 6  | ,035 |        |
| sv7(1)                  | -,349   | ,191     | 3,334   | 1  | ,068 | ,705   |
| sv7(2)                  | ,163    | ,169     | ,928    | 1  | ,335 | 1,177  |
| sv7(3)                  | -,006   | ,169     | ,001    | 1  | ,972 | ,994   |
| sv7(4)                  | ,145    | ,155     | ,868    | 1  | ,352 | 1,156  |
| sv7(5)                  | ,234    | ,152     | 2,376   | 1  | ,123 | 1,263  |
| sv7(6)                  | ,349    | ,177     | 3,869   | 1  | ,049 | 1,417  |
| VASTY2                  |         |          | 207,524 | 35 | ,000 |        |
| VASTY2(1)               | ,570    | ,344     | 2,744   | 1  | ,098 | 1,769  |
| VASTY2(2)               | ,614    | ,342     | 3,227   | 1  | ,072 | 1,847  |
| VASTY2(3)               | ,867    | ,332     | 6,820   | 1  | ,009 | 2,379  |
| VASTY2(4)               | ,221    | ,370     | ,358    | 1  | ,550 | 1,247  |
| VASTY2(5)               | -,652   | ,496     | 1,730   | 1  | ,188 | ,521   |
| VASTY2(6)               | -18,215 | 2101,929 | ,000    | 1  | ,993 | ,000   |
| VASTY2(7)               | 1,745   | ,306     | 32,575  | 1  | ,000 | 5,727  |
| VASTY2(8)               | ,896    | ,333     | 7,243   | 1  | ,007 | 2,450  |
| VASTY2(9)               | ,400    | ,361     | 1,225   | 1  | ,268 | 1,491  |
| VASTY2(10)              | ,617    | ,343     | 3,243   | 1  | ,072 | 1,853  |
| VASTY2(11)              | ,399    | ,357     | 1,248   | 1  | ,264 | 1,491  |
| VASTY2(12)              | 1,170   | ,319     | 13,436  | 1  | ,000 | 3,222  |
| VASTY2(13)              | 1,352   | ,320     | 17,837  | 1  | ,000 | 3,865  |
| VASTY2(14)              | ,701    | ,337     | 4,327   | 1  | ,038 | 2,015  |
| VASTY2(15)              | ,039    | ,376     | ,011    | 1  | ,918 | 1,039  |
| VASTY2(16)              | -,908   | ,646     | 1,977   | 1  | ,160 | ,403   |
| VASTY2(17)              | -17,931 | 2092,993 | ,000    | 1  | ,993 | ,000   |
| VASTY2(18)              | -2,287  | 1,047    | 4,773   | 1  | ,029 | ,102   |
| VASTY2(19)              | -2,262  | 1,049    | 4,654   | 1  | ,031 | ,104   |
| VASTY2(20)              | -1,483  | ,644     | 5,296   | 1  | ,021 | ,227   |
| VASTY2(21)              | ,615    | ,346     | 3,163   | 1  | ,075 | 1,850  |
| VASTY2(22)              | 1,118   | ,320     | 12,169  | 1  | ,000 | 3,058  |
| VASTY2(23)              | ,554    | ,348     | 2,533   | 1  | ,112 | 1,741  |

## Variables in the Equation

|                     |            | 95% C.I. for EXP(B) |        |
|---------------------|------------|---------------------|--------|
|                     |            | Lower               | Upper  |
| Step 1 <sup>a</sup> | sv7        |                     |        |
|                     | sv7(1)     | ,485                | 1,026  |
|                     | sv7(2)     | ,845                | 1,639  |
|                     | sv7(3)     | ,713                | 1,385  |
|                     | sv7(4)     | ,852                | 1,567  |
|                     | sv7(5)     | ,938                | 1,701  |
|                     | sv7(6)     | 1,001               | 2,005  |
|                     | VASTY2     |                     |        |
|                     | VASTY2(1)  | ,901                | 3,473  |
|                     | VASTY2(2)  | ,946                | 3,608  |
|                     | VASTY2(3)  | 1,241               | 4,559  |
|                     | VASTY2(4)  | ,604                | 2,574  |
|                     | VASTY2(5)  | ,197                | 1,377  |
|                     | VASTY2(6)  | ,000                | .      |
|                     | VASTY2(7)  | 3,145               | 10,429 |
|                     | VASTY2(8)  | 1,276               | 4,705  |
|                     | VASTY2(9)  | ,735                | 3,027  |
|                     | VASTY2(10) | ,947                | 3,627  |
|                     | VASTY2(11) | ,740                | 3,004  |
|                     | VASTY2(12) | 1,723               | 6,022  |
|                     | VASTY2(13) | 2,064               | 7,238  |
|                     | VASTY2(14) | 1,041               | 3,898  |
|                     | VASTY2(15) | ,497                | 2,172  |
|                     | VASTY2(16) | ,114                | 1,430  |
|                     | VASTY2(17) | ,000                | .      |
|                     | VASTY2(18) | ,013                | ,790   |
|                     | VASTY2(19) | ,013                | ,813   |
|                     | VASTY2(20) | ,064                | ,803   |
|                     | VASTY2(21) | ,939                | 3,643  |
|                     | VASTY2(22) | 1,632               | 5,730  |
|                     | VASTY2(23) | ,880                | 3,445  |

review only

## Variables in the Equation

|            | B       | S.E.     | Wald    | df | Sig. | Exp(B) |
|------------|---------|----------|---------|----|------|--------|
| VASTY2(24) | 1,386   | ,312     | 19,781  | 1  | ,000 | 4,000  |
| VASTY2(25) | -,156   | ,437     | ,128    | 1  | ,720 | ,855   |
| VASTY2(26) | -18,002 | 2347,147 | ,000    | 1  | ,994 | ,000   |
| VASTY2(27) | -18,128 | 2094,181 | ,000    | 1  | ,993 | ,000   |
| VASTY2(28) | -18,210 | 2675,280 | ,000    | 1  | ,995 | ,000   |
| VASTY2(29) | -18,268 | 2098,326 | ,000    | 1  | ,993 | ,000   |
| VASTY2(30) | ,053    | ,387     | ,018    | 1  | ,892 | 1,054  |
| VASTY2(31) | -17,716 | 2092,065 | ,000    | 1  | ,993 | ,000   |
| VASTY2(32) | -1,597  | ,772     | 4,278   | 1  | ,039 | ,203   |
| VASTY2(33) | -2,268  | 1,049    | 4,677   | 1  | ,031 | ,103   |
| VASTY2(34) | ,465    | ,351     | 1,755   | 1  | ,185 | 1,592  |
| VASTY2(35) | -17,980 | 2252,756 | ,000    | 1  | ,994 | ,000   |
| weekday    |         |          | 3,267   | 6  | ,775 |        |
| weekday(1) | ,024    | ,152     | ,025    | 1  | ,874 | 1,025  |
| weekday(2) | -,069   | ,156     | ,194    | 1  | ,659 | ,933   |
| weekday(3) | ,046    | ,153     | ,091    | 1  | ,763 | 1,047  |
| weekday(4) | ,025    | ,155     | ,026    | 1  | ,873 | 1,025  |
| weekday(5) | -,061   | ,158     | ,146    | 1  | ,702 | ,941   |
| weekday(6) | -,199   | ,162     | 1,515   | 1  | ,218 | ,820   |
| holiday(1) | -,243   | ,256     | ,898    | 1  | ,343 | ,784   |
| season     |         |          | 7,242   | 4  | ,124 |        |
| season(1)  | ,032    | ,129     | ,062    | 1  | ,803 | 1,033  |
| season(2)  | ,068    | ,119     | ,329    | 1  | ,566 | 1,071  |
| season(3)  | -,084   | ,133     | ,406    | 1  | ,524 | ,919   |
| season(4)  | -,292   | ,142     | 4,206   | 1  | ,040 | ,747   |
| Constant   | -3,212  | ,317     | 102,895 | 1  | ,000 | ,040   |

## Variables in the Equation

|            |  | 95% C.I. for EXP(B) |       |
|------------|--|---------------------|-------|
|            |  | Lower               | Upper |
| VASTY2(24) |  | 2,172               | 7,370 |
| VASTY2(25) |  | ,364                | 2,012 |
| VASTY2(26) |  | ,000                | .     |
| VASTY2(27) |  | ,000                | .     |
| VASTY2(28) |  | ,000                | .     |
| VASTY2(29) |  | ,000                | .     |
| VASTY2(30) |  | ,493                | 2,252 |
| VASTY2(31) |  | ,000                | .     |
| VASTY2(32) |  | ,045                | ,920  |
| VASTY2(33) |  | ,013                | ,808  |
| VASTY2(34) |  | ,800                | 3,166 |
| VASTY2(35) |  | ,000                | .     |
| weekday    |  |                     |       |
| weekday(1) |  | ,760                | 1,381 |
| weekday(2) |  | ,687                | 1,268 |
| weekday(3) |  | ,776                | 1,413 |
| weekday(4) |  | ,757                | 1,388 |
| weekday(5) |  | ,690                | 1,284 |
| weekday(6) |  | ,597                | 1,125 |
| holiday(1) |  | ,475                | 1,296 |
| season     |  |                     |       |
| season(1)  |  | ,802                | 1,329 |
| season(2)  |  | ,848                | 1,351 |
| season(3)  |  | ,709                | 1,192 |
| season(4)  |  | ,565                | ,987  |
| Constant   |  |                     |       |

a. Variable(s) entered on step 1: sv7, VASTY2, weekday, holiday, season.

\*\*

EXECUTE .

STROBE Statement—checklist of items that should be included in reports of observational studies

|                              | Item No | Recommendation                                                                                                                                                                                                                |
|------------------------------|---------|-------------------------------------------------------------------------------------------------------------------------------------------------------------------------------------------------------------------------------|
| <b>Title and abstract</b>    | 1       | (a) Indicate the study's design with a commonly used term in the title or the abstract<br>(b) Provide in the abstract an informative and balanced summary of what was done and what was found<br><a href="#">Page 2 and 3</a> |
| <b>Introduction</b>          |         |                                                                                                                                                                                                                               |
| Background/rationale         | 2       | Explain the scientific background and rationale for the investigation etc. <a href="#">Page 3-4</a>                                                                                                                           |
| Objectives                   | 3       | State specific objectives, including any prespecified hypotheses. <a href="#">Page 4</a>                                                                                                                                      |
| <b>Methods</b>               |         |                                                                                                                                                                                                                               |
| Study design                 | 4       | Present key elements of study design early in the paper, <a href="#">page 4</a>                                                                                                                                               |
| Setting                      | 5       | Describe the setting, locations, and relevant dates, including periods of recruitment, exposure, follow-up, and data collection, <a href="#">page 4-5</a>                                                                     |
| Participants                 | 6       | <a href="#">Page 5</a>                                                                                                                                                                                                        |
| Variables                    | 7       | Clearly define all outcomes, exposures, predictors, potential confounders, and effect modifiers. Give diagnostic criteria, if applicable, <a href="#">page 6</a>                                                              |
| Data sources/<br>measurement | 8*      | For each variable of interest, give sources of data and details of methods of assessment (measurement). Describe comparability of assessment methods if there is more than one group, <a href="#">page 6-7</a>                |
| Bias                         | 9       | Describe any efforts to address potential sources of bias, <a href="#">page 6-7</a>                                                                                                                                           |
| Study size                   | 10      | Explain how the study size was arrived at, <a href="#">page 6-7</a>                                                                                                                                                           |
| Quantitative variables       | 11      | Explain how quantitative variables were handled in the analyses. If applicable, describe which groupings were chosen and why, <a href="#">page 6-7</a>                                                                        |
| Statistical methods          | 12      | <a href="#">Page 6-7</a>                                                                                                                                                                                                      |

Continued on next page

| <b>Results</b>           |     |                                                                                                                                                                                                                                                                                                                                                                                                                            |
|--------------------------|-----|----------------------------------------------------------------------------------------------------------------------------------------------------------------------------------------------------------------------------------------------------------------------------------------------------------------------------------------------------------------------------------------------------------------------------|
| Participants             | 13* | (a) Report numbers of individuals at each stage of study—eg numbers potentially eligible, examined for eligibility, confirmed eligible, included in the study, completing follow-up, and analysed<br>(b) Give reasons for non-participation at each stage<br>(c) Consider use of a flow diagram                                                                                                                            |
| Descriptive data         | 14* | (a) Give characteristics of study participants (eg demographic, clinical, social) and information on exposures and potential confounders<br>(b) Indicate number of participants with missing data for each variable of interest <b>p 7-9 table 1</b><br>(c) <i>Cohort study</i> —Summarise follow-up time (eg, average and total amount)                                                                                   |
| Outcome data             | 15* | <i>Cohort study</i> —Report numbers of outcome events or summary measures over time<br><i>Case-control study</i> —Report numbers in each exposure category, or summary measures of exposure<br><i>Cross-sectional study</i> —Report numbers of outcome events or summary measures <b>p 7-9, table 1-2</b>                                                                                                                  |
| Main results             | 16  | (a) Give unadjusted estimates and, if applicable, confounder-adjusted estimates and their precision (eg, 95% confidence interval). Make clear which confounders were adjusted for and why they were included <b>p 7-9</b><br>(b) Report category boundaries when continuous variables were categorized<br>(c) If relevant, consider translating estimates of relative risk into absolute risk for a meaningful time period |
| Other analyses           | 17  | Report other analyses done—eg analyses of subgroups and interactions, and sensitivity analyses                                                                                                                                                                                                                                                                                                                             |
| <b>Discussion</b>        |     |                                                                                                                                                                                                                                                                                                                                                                                                                            |
| Key results              | 18  | Summarise key results with reference to study objectives <b>p 9-10</b>                                                                                                                                                                                                                                                                                                                                                     |
| Limitations              | 19  | Discuss limitations of the study, taking into account sources of potential bias or imprecision. Discuss both direction and magnitude of any potential bias, <b>p 11</b>                                                                                                                                                                                                                                                    |
| Interpretation           | 20  | Give a cautious overall interpretation of results considering objectives, limitations, multiplicity of analyses, results from similar studies, and other relevant evidence <b>p11-12</b>                                                                                                                                                                                                                                   |
| Generalisability         | 21  | Discuss the generalisability (external validity) of the study results <b>p11-12</b>                                                                                                                                                                                                                                                                                                                                        |
| <b>Other information</b> |     |                                                                                                                                                                                                                                                                                                                                                                                                                            |
| Funding                  | 22  | Give the source of funding and the role of the funders for the present study and, if applicable, for the original study on which the present article is based <b>p 12</b>                                                                                                                                                                                                                                                  |

\*Give information separately for cases and controls in case-control studies and, if applicable, for exposed and unexposed groups in cohort and cross-sectional studies.

**Note:** An Explanation and Elaboration article discusses each checklist item and gives methodological background and published examples of transparent reporting. The STROBE checklist is best used in conjunction with this article (freely available on the Web sites of PLoS Medicine at <http://www.plosmedicine.org/>, Annals of Internal Medicine at <http://www.annals.org/>, and Epidemiology at <http://www.epidem.com/>). Information on the STROBE Initiative is available at [www.strobe-statement.org](http://www.strobe-statement.org).

# BMJ Open

## NURSING WORKLOAD, PATIENT SAFETY INCIDENTS AND MORTALITY – AN OBSERVATIONAL STUDY FROM FINLAND

|                                 |                                                                                                                                                                                                                                           |
|---------------------------------|-------------------------------------------------------------------------------------------------------------------------------------------------------------------------------------------------------------------------------------------|
| Journal:                        | <i>BMJ Open</i>                                                                                                                                                                                                                           |
| Manuscript ID                   | bmjopen-2017-016367.R3                                                                                                                                                                                                                    |
| Article Type:                   | Research                                                                                                                                                                                                                                  |
| Date Submitted by the Author:   | 20-Dec-2017                                                                                                                                                                                                                               |
| Complete List of Authors:       | Fagerström, Lisbeth; Åbo Akademi University, Faculty of Education and Welfare; University College of Southeast Norway, Kinnunen, Marina; Vaasa Central Hospital<br>Saarela, Jan; Åbo Akademi University, Faculty of Education and Welfare |
| <b>Primary Subject Heading</b>: | Nursing                                                                                                                                                                                                                                   |
| Secondary Subject Heading:      | Health services research                                                                                                                                                                                                                  |
| Keywords:                       | Health & safety < HEALTH SERVICES ADMINISTRATION & MANAGEMENT, Human resource management < HEALTH SERVICES ADMINISTRATION & MANAGEMENT, Risk management < HEALTH SERVICES ADMINISTRATION & MANAGEMENT                                     |
|                                 |                                                                                                                                                                                                                                           |

SCHOLARONE™  
Manuscripts

1  
2  
3 **NURSING WORKLOAD, PATIENT SAFETY INCIDENTS AND MORTALITY – AN**  
4 **OBSERVATIONAL STUDY FROM FINLAND**  
5

6  
7  
8 **Authors:**

9 Professor Lisbeth Fagerström, PhD,

10 Åbo Akademi University, Faculty of Education and Welfare Studies, Vaasa, Finland;

11 University College of Southeast Norway, Faculty of Health and Social Sciences, Drammen,  
12 Norway  
13  
14  
15

16  
17  
18 Chief Director of Nursing Marina Kinnunen, PhD

19 Vaasa Central Hospital, Vaasa, Finland  
20  
21

22  
23 Professor Jan Saarela, PhD,

24 Åbo Akademi University, Faculty of Education and Welfare Studies, Vaasa, Finland;

25 University of Helsinki, Swedish School of Social Science, Helsinki, Finland  
26  
27  
28  
29

30 **Corresponding Author:**

31 Professor Lisbeth Fagerström, Faculty of Education and Welfare Studies, Åbo Akademi

32 University, Strandgatan 2, 65101 Vaasa, Finland. Mobile: +358414331097; +4745503873,

33 phone number: +358 2 21531, email: [lisbeth.fagerstrom@abo.fi](mailto:lisbeth.fagerstrom@abo.fi); [lisbeth.fagerstrom@usn.no](mailto:lisbeth.fagerstrom@usn.no)

34  
35 Key words: nurse staffing, outcomes, patient safety, mortality, human resources

36  
37 Word count: 3 502 words.  
38  
39  
40  
41  
42  
43  
44  
45  
46  
47  
48  
49  
50  
51  
52  
53  
54  
55  
56  
57  
58  
59  
60



## Abstract

**Objective** To investigate whether the daily workload per nurse (OPC/nurse) as measured by the RAFAELA system correlates with different types of patient safety incidents and with patient mortality, and to compare the results with regressions based on the standard patients/nurse measure.

**Setting** We obtained data from 36 units from four Finnish hospitals. One was a tertiary acute care hospital, and the three others were secondary acute care hospitals.

**Participants** Patients' nursing intensity (249,123 classifications), nursing resources, patient safety incidents and patient mortality were collected on a daily basis during one year, corresponding to 12,475 data points. Associations between OPC/nurse and patient safety incidents or mortality were estimated using unadjusted logistic regression models, and models that adjusted for ward-specific effects, and effects of day of the week, holiday and season.

**Primary and secondary outcome measures** Main outcome measures were patient safety incidents and death of a patient.

**Results** When OPC/nurse was above the assumed optimal level, the adjusted odds for a patient safety incident were 1.24 (95% CI: 1.08-1.42) that of the assumed optimal level, and 0.79 (95% CI: 0.67-0.93) if it was below the assumed optimal level. Corresponding estimates for patient mortality were 0.78 (95% CI: 0.60-1.00) and 1.43 (95% CI: 1.18-1.73), respectively. As compared with the patients/nurse classification, models estimated on basis of the RAFAELA classification system generally provided larger effect sizes, greater statistical power, and better model fit, although the difference was not very large. Net benefits as calculated on basis of decision analysis did not provide any clear evidence on which measure to prefer.

**Conclusions** We have demonstrated an association between daily workload per nurse and patient safety incidents and mortality. Current findings need to be replicated by future studies.

### Strengths and limitations of this study

- The study is the first to assess the relationship between nursing workload and patient outcomes based on data obtained on a daily basis
- The instrument used here takes patient characteristics, such as age, sex and diagnoses, into account

- The study provides some evidence to suggest that the traditional nurse staffing measure, the patients-to-nurse ratio, may partly fail to control for patient severity and case mix
- The study does not address the potential influence of skill-mix, competence level, work experience, or the professionals' patient-related direct time

## Introduction

Many studies have shown that insufficient nurse staffing in hospital-based care negatively affects outcomes such as mortality, infections, and failure to rescue (1-6). However, the results are inconsistent and indicate a complex and non-linear relationship between nursing workload (NWL), mortality, and other patient outcomes (7-12). The strength of the evidence underpinning the association between nurse staffing and outcomes in previous studies can be challenged. Poor research designs, measurement problems, and/or imprecise data that do not take into account daily variations in patients' care needs, may contribute to the mixed findings (8). Higher nurse staffing and richer skill mix are associated with improved patient outcomes (4,8,10). Therefore, higher ratios have been recommended for improving patient safety and outcomes (1,9). However, it is difficult to set fixed, standard patient-to-nurse ratios for units in acute care hospitals, as evidenced in systematic reviews and other studies (7,10,13-15). Staffing levels must instead match patients' nursing care needs (8,16-17).

In an attempt to accommodate some of these issues, the RAFAELA patient classification system was developed in the 1990s in Finland (16, 18-19). As compared to most other patient classification systems that use fixed patient-to-nurse ratios, the RAFAELA system use daily data on patients' care needs and the workload per nurse. The main purpose of the RAFAELA system is to ensure an appropriate allocation of nurse staff resources and, thus, a preferable nursing workload, which has been labelled as an optimal nursing workload (NWL). The latter term refers to a situation when patients' care needs are assumed to be in balance with the nursing resources, and that working conditions can be assumed as being favorable, most desirable, or satisfactory for the realization of good nursing care (16, 18-22). While certain realities such as economic restraints cannot be disregarded, the intention with the RAFAELA system is to provide a nursing workload measure dedicated to the reduction or elimination of adverse events.

1  
2  
3 In the RAFAELA system, NWL is based on daily assessments of patients' care needs and the  
4 registration of the nursing staff resources (16). The PAONCIL method ('Professional  
5 Assessment of Optimal Nursing Care Intensity Level') is used to establish an assumed  
6 optimal NWL for a specific ward. Daily measurements of NWL (OPC/nurse) are  
7 subsequently compared to this level, and resources are considered to be appropriately  
8 allocated when the actual NWL is at this level (19, 21). This would mean that a satisfactory  
9 number of nurses, neither too many nor too few, are being allocated to provide care for the  
10 actual patient group.  
11  
12  
13  
14  
15

16  
17 We have found only two studies (8,18) on the relationship between nursing workload based  
18 on assessed requirements for care (as opposed to nurse patient ratios or equivalent measures)  
19 and patient outcomes. Needleman et al (8) found a significant association between patient  
20 mortality and increased exposure to unit shifts when nurse staffing was below the target level.  
21 In a recent study by Junttila et al (18) based on monthly means, the incidence rate of death  
22 when average daily NWL was above the assumed optimal level was 13-fold that when the  
23 average daily NWL was below this level. However, to our knowledge, no studies exist on this  
24 relationship using daily-level data.  
25  
26  
27  
28  
29  
30

31  
32 The aim of this observational study was therefore to investigate whether the daily workload  
33 per nurse (OPC/nurse), as a measure based on the RAFAELA system, correlates with patient  
34 safety incidents and patient mortality, using data collected on a daily basis. In addition, we  
35 wanted to compare the estimates with those based on the standard patients-to-nurse ratio  
36 (patients/nurse).  
37  
38  
39  
40

## 41 **METHODS**

### 42 **Study setting**

43  
44  
45 We obtained data from 36 units from four Finnish hospitals. One (A, 9 units) is a tertiary  
46 acute care hospital, whereas the three others (B, 14 units; C, 4 units; D, 9 units) are secondary  
47 acute care hospitals. Inclusion criteria were daily use of the RAFAELA system according to  
48 standards, reliable nursing intensity data as expressed in terms of a yearly reliability test done  
49 by parallel classifications (requirement is that unanimity is over 70 per cent), and applicable  
50 nursing intensity level measured with the PAONCIL method (16,19-21). Units that had  
51  
52  
53  
54  
55  
56  
57  
58  
59  
60

1  
2  
3 undergone major organizational changes over the previous year were excluded. The A and B  
4 data represent the period January 1 to December 31, 2012, and the C and D data represent the  
5 period January 1 to December 31, 2013.

6  
7 This study received approval from the chief administrative physicians of all four hospitals  
8 involved. No further ethical approval was therefore necessary, which is in accordance with the  
9 regulatory regime for conducting health research in Finland. We did not include any sensitive  
10 health-related data of patients in the study, or any information regarding characteristics of the  
11 nurses. The RAFAELA is owned by the Association of Finnish Local and Regional  
12 Association Authorities and governed by non-commercial Finnish Consulting Group Ltd.  
13  
14  
15  
16  
17

### 18 19 **Measurement of NWL in the RAFAELA nursing intensity and staffing system**

20  
21  
22 The RAFAELA is a standardized, person-centered, evidence-based system for nurse staffing  
23 that was developed in the 1990s (16, 19). The feasibility, validity, and reliability of the  
24 RAFAELA have been tested with good results (16, 18, 21, 22). It is now used in about 90 per  
25 cent of the hospitals in Finland, and has lately been implemented in Iceland, the Netherlands,  
26 Sweden, and Norway (22). A requirement for users of the RAFAELA system is that the  
27 interrater reliability for nursing intensity measurements should be tested yearly.  
28  
29  
30  
31  
32

33  
34 The daily nursing intensity of each unit is assessed by all the responsible registered nurses on  
35 each day. One registered nurse usually classify one to six patients per day. The assessment is  
36 done by classifying the patient's care needs by the Oulu Patient Classification Q (OPC)  
37 instrument. This instrument consists of six sub-areas of nursing care. The nursing intensity  
38 level varies from 6 to 24 points for an individual patient per calendar day (16, 19). The  
39 nurses' workload is calculated by dividing the total amount of nursing intensity points on the  
40 unit, e.g. 350, with the number of nurses who take care of patients, e.g. 12, during the same 24  
41 hours. In this example, the patient-related NWL will then be 29.2 OPC points per nurse  
42 (hereafter referred to as OPC/nurse).  
43  
44  
45  
46  
47  
48

49  
50 The underlying assumption of the RAFAELA system is that the nature and characteristics of  
51 nursing care differ between wards. The recommended NWL of each ward therefore has to be  
52 determined by the PAONCIL method. The development, testing and description of this  
53 method has been reported in several publications (16,19-22). Thus, the method is used to  
54 assess each ward's recommended optimal NWL including various contextual and  
55  
56  
57  
58  
59  
60

1  
2  
3 organizational factors (21). The recommendation is that this level has to be reassessed by  
4 conducting the PAONCIL study every second year. The ones utilised in this study were not  
5 older than two or three years. The basic idea of the RAFAELA system is that the observed  
6 NWL (e.g. 29.2 points/nurse) is compared with the established preferred for the same unit  
7 (e.g. 22-30 points/nurse). If the observed NWL lies within the established limits, the nursing  
8 intensity is considered to be at the assumed optimal level.  
9  
10  
11  
12  
13

14 The data we use in this paper consist of daily measurements based on the RAFAELA system  
15 (19). They correspond to every admitted patient's nursing intensity during one year and were  
16 based on 249,123 classifications of patients' nursing intensity (OPC classifications). Each  
17 day, the patient-related nurse resources were also recorded, using a standardized model where  
18 non-patient related time was excluded. Apart from each day's staff data (OPC/patient,  
19 OPC/nurse, etc.), there was daily information also on patient incidents and patient mortality.  
20 All data were collected during a period of one year, meaning that there were 12,475 data  
21 points (not approximately 13,140, since some wards were closed for shorter periods, foremost  
22 because of holidays). Table 1 provides the central variables of the data in terms of each unit's  
23 PAONCIL level, daily mean number of classified patients, daily mean number of OPC  
24 classifications, total OPC points, nursing staff resources, number of patients per nurse, OPC  
25 points per nurse, incidents, and deaths (see Table 1).  
26  
27  
28  
29  
30  
31  
32  
33  
34

35 (Insert Table 1 here)  
36  
37

### 38 **Outcomes**

39  
40

41 Data on incidents were collected daily from The Reporting System for Safety Incidents in  
42 Health Care Organizations (HaiPro), which is a comprehensive and standardized patient  
43 safety system in Finland (23, 24). As defined by HaiPro, an incident is a safety hazard that  
44 may harm or harm the patient. Incidents are classified into 14 categories (24), but there are  
45 two main categories: near miss, which may have caused harm to the patient, but was  
46 prevented by chance or by timely preventive actions, and adverse events, which are negative  
47 events that caused harm to the patient. We here categorise incidents in four ways: (1) whether  
48 at least one incident, of any type, occurred (Incident), (2) whether a patient was affected to  
49 any degree (Patient affected), (3) whether the incident caused harm to the patient (Harm to  
50 patient), and (4) whether there was more than one incident, of any type, on the same day (>1  
51  
52  
53  
54  
55  
56  
57  
58  
59  
60

1  
2  
3 incident), within the available follow-up of 365 days. In addition, we use patient mortality  
4 (Death) as a fifth type of adverse event. The mortality data were retrieved from the local  
5 mortality register of each hospital.  
6  
7

## 8 9 **Statistical analyses**

10  
11  
12 Using logistic regression analyses, associations were estimated on the daily level between  
13 nursing intensity per nurse (OPC/nurse) in relation to the assumed optimal level and each type  
14 of outcome, i.e., each of the four types of incidents. We estimated associations both in  
15 unadjusted models and in models that adjusted for ward-specific effects and effects of day of  
16 the week, holiday and season, using dummy variables. Thus, we allowed for heterogeneity in  
17 the intercept term, which was motivated by the fact that across-ward variability is fairly  
18 modest. The categories of the variables are described in the footnotes of Table 2 (see Table 2).  
19 Parallel analyses were performed with the standard measure of nursing workload,  
20 patients/nurse. Supplementary electronic files provide full details of the models estimated (see  
21 Supplementary file 1).  
22  
23  
24  
25  
26  
27  
28  
29

30 We report results in which evaluations based on the RAFAELA system (OPC/nurse) were  
31 assessed using the assumed optimal level with a  $\pm 15\%$  deviation around this point (16, 19,  
32 21), and in which the patients/nurse measure was assessed using a categorization with three  
33 equally large groups. The results reported (in Table 2), were consequently based on 20  
34 different regressions. Model fit indices ( $-2 \log$  likelihood, Akaike information criterion, and  
35 Nagelkerke R Square) are provided to facilitate comparisons between regressions based on  
36 the OPC/nurse measure and the patients/nurse measure. The analyses were performed using  
37 SPSS 21. All estimates are expressed in terms of odds ratios with 95% confidence intervals.  
38  
39  
40  
41  
42  
43  
44

45 Apart from comparing the predictive accuracy of the models that utilize the OPC/nurse  
46 measure and the patients/nurse measure, respectively, we have also used decision-analytic  
47 methods (25). These ascertain the value of prediction models by incorporating information on  
48 consequences and they require explicit valuation of outcomes. The technique may thus help in  
49 deciding on which measure to prefer, that is, the one with a higher net benefit.  
50  
51  
52  
53  
54  
55  
56  
57  
58  
59  
60

## RESULTS

When OPC/nurse was above the assumed optimal level, the unadjusted odds for a patient safety incident were 1.28 (95% CI: 1.13-1.45) that of the assumed optimum level (see Table 2). Corresponding odds ratios for the other types of incidents, patient affected, harm to patient, and >1 incident, were 1.13, 1.16, and 1.25, respectively. Odds ratios for patient mortality was even higher, or 1.42 (95% CI: 1.19-1.69). If OPC/nurse was below the recommended optimal level, the odds ratio for incidents and patient mortality were, conversely lower, or around 0.67 for the different types of incidents, and 0.55 for patient mortality.

(Insert Table 2 here)

When ward-specific effects and effects of day of the week, holiday and season were adjusted for, the odds ratios diminished somewhat (see Table 2). Nursing workload above the assumed optimal level was associated with 8-34 per cent higher odds of an incident, depending on the type of incident, and 43 per cent higher odds of patient mortality, as compared to if it was at the assumed optimal level. If OPC/nurse was below this level, the odds ratio for an incident and for patient mortality was approximately 25 per cent lower. Adding the ward-specific effects improved model fit considerably. Also the variables for weekday, holiday, and season improved the model fit, except for the outcomes >1 incident and death. The odds for incidents were in general least likely to occur on Saturdays and on holidays, whereas there were no obvious seasonal effects (not shown here). Complete descriptions of all estimates and the models estimated, with predictive indices, can be found in the supplementary electronic file (see Supplementary file 1).

The two lower panels in Table 2 provide results of parallel analyses when nursing workload was measured according to the standard patients-to-nurse ratio (patients/nurse). As compared with results based on the RAFAELA system, there are three main issues to be pointed out. First, effects sizes in terms of odds ratios were consistently smaller with the patients/nurse approach than with the OPC/nurse approach, irrespective if unadjusted or adjusted models are compared. For instance, in the fully adjusted model, the odds ratio of an incident was 1.13 if workload was in the highest one-third, and 0.89 if it was in the lowest one-third, as compared to if it was in the middle one-third. These effects were notably smaller than the estimated

1  
2  
3 relative effect sizes for being above and below the recommended optimum according to the  
4 RAFAELA system, which were 1.24 and 0.79, respectively. Second, in almost all instances,  
5 the estimates of the patients/nurse approach had smaller statistical power in terms of wider  
6 confidence intervals (i.e., larger standard errors). However, far from all estimates for the  
7 OPC/nurse measure, or for the patients/nurse measure, were statistically significant at the five  
8 per cent level. Third, when comparing results for the patients/nurse measure to the OPC/nurse  
9 measure for otherwise similar models and outcomes, the model fit of the former was  
10 consistently poorer (values of the log likelihood and AIC were higher and R square lower). It  
11 nevertheless needs to be stressed that the difference was not very large.  
12  
13  
14  
15  
16  
17  
18

19 We experimented also with other ways to categorize nursing workload. For OPC/nurse, we  
20 used an alternative with a halved deviation from the recommended optimal point, i.e.,  $\pm 7.5\%$   
21 instead of  $\pm 15\%$ , and with a doubled deviation, i.e.,  $\pm 30\%$  from the optimal point. The  
22 patient-to-nurse measure was also assessed using alternative categorizations, such as five and  
23 seven equally large groups, respectively. Results of these additional regressions supported the  
24 overall conclusions as reported above. In models using the patients/nurse measure,  
25 associations were mostly weaker, came with lower statistical power, and they were less  
26 systematic, as compared to models based on the OPC/nurse measure (see Supplementary file  
27 1).  
28  
29  
30  
31  
32  
33  
34

35 Hence, our analyses suggest that, in terms of predictive accuracy, models estimated on basis  
36 of nursing workload according to the RAFAELA system are slightly to be preferred above  
37 otherwise similar models that use the standard patients/nurse measure. It is not evident,  
38 however, which measure is to be preferred when it comes to decision making. Figures 1 to 5  
39 summarizes net benefit values calculated based on the models estimated for each type of  
40 patient safety incident and patient mortality, respectively; see (25) for technical details. The  
41 values have been calculated over a reasonable range for the probability of an event (type of  
42 incident or mortality). Models based on the OPC/nurse measure and the patients/nurse  
43 measure are to be compared by looking at the net benefit values (see Figure 1, Figure 2,  
44 Figure 3, Figure 4, Figure 5). The one with higher such values is to be preferred above the  
45 other. As can be seen, there is no clear discrepancy. For some threshold probabilities, the  
46 OPC/nurse measure lies above the patients/nurse measure, while for others, the situation is the  
47 opposite. For each event, the two curves are essentially overlapping, and in most instances the  
48  
49  
50  
51  
52  
53  
54  
55  
56  
57  
58  
59  
60



1  
2  
3 difference in net benefit values is rather modest. In terms of the magnitude of the benefit for  
4 patients, it is consequently not evident which measure of nursing workload is to be preferred.  
5  
6

7 (Insert Figure 1 here)

8 (Insert Figure 2 here)

9  
10 (Insert Figure 3 here)

11 (Insert Figure 4 here)

12 (Insert Figure 5 here)  
13  
14  
15  
16  
17  
18

## 19 **DISCUSSION**

20 We find that the odds for a patient safety incident was 10-30 per cent higher, and for patient  
21 mortality about 40 per cent higher, if the nursing workload as measured by the RAFAELA  
22 system (OPC/nurse) was above the assumed optimal level, as compared to if it was at this  
23 level. If OPC/nurse was below the level, the odds for a patient safety incident and for  
24 mortality was approximately 25 per cent lower. The latter situation would mean that nurses  
25 have more time for caring and observing each patient, which may reduce the risk for adverse  
26 events and accordingly prevent the patient's health condition from deteriorating.  
27  
28  
29  
30  
31  
32

33 Previous research (9) did not find significant changes in patient safety associated with  
34 decreased NWL and could not confirm compliance with ratios per shift. Other studies used  
35 hospital-level administrative data that imprecisely allocated staffing to patients' care needs (8,  
36 11). We think that such associations between nurse staffing, patient outcomes and mortality  
37 may be challenged (12, 18). Needleman et al. (8) found similar results between mortality and  
38 day-to-day, shift-to-shift variation in staffing, and Junttila et al. (18) between mortality and  
39 days with NWL over optimal level on a monthly level. The OPC/nurse measure is more  
40 detailed than the traditional patients/nurse measure. While comparable to the 'hours per  
41 patient day model' (26), its accuracy of nursing resources is higher. For example, if a nurse  
42 becomes sick during a shift and leaves the unit, the nurse in charge will deduct these hours  
43 from the unit's resources.  
44  
45  
46  
47  
48  
49  
50  
51

52 Several factors affect the reporting of incidents, e.g., staff's lack of motivation or knowledge,  
53 nurse staff shortage, stressful situations, or burn out. A reasonable argument is therefore that a  
54 very high NWL indicates a working situation where the nurse staff resources are too low.  
55  
56  
57  
58  
59  
60

1  
2  
3 Still, too few resources can result in the deprioritization of the registration of adverse events  
4 and thus the underreporting of incidents connected to high NWL, which may affect the results  
5 of our study and the conclusions that we draw.  
6  
7

8  
9 Our study provided results based on daily measures of all-in-hospital patients' actual nursing  
10 intensity, including detailed registration of used staff resources and the association with  
11 incidents and mortality on daily levels. The HaiPro database, upon which our analyses were  
12 based, meets WHO criteria for a good reporting system (23, 24). However, we know that  
13 despite a good reporting system, incidents reports are missing due to several reasons, such as  
14 lack of time, personnel's involvement etc. The Global Trigger Tool (GTT) is another method  
15 to analyze patient safety, which has been recommended (27). However, it collects triggers and  
16 patient safety incidents from treatment periods, not on a daily basis, whereas data on incidents  
17 collected from HaiPro can be targeted to certain days (24). Units that underwent major  
18 organizational changes over the previous year were excluded from our study, because they  
19 may negatively influence the data quality including incident reports. The accuracy of the data  
20 used, in terms of NWL, incidents, and mortality, is highly reliable and probably better than in  
21 previous studies on NWL and adverse outcomes. The staffing measurement determined by the  
22 RAFAELA system implicitly considers specific characteristics of each ward, such as  
23 organizational factors in terms of unit size, leadership, and physical environment (16,19,21).  
24  
25  
26  
27  
28  
29  
30  
31  
32  
33  
34

35 We found evidence that a staffing measure based on daily measurement of individual patient  
36 care needs and the recommended NWL (OPC/nurse) is slightly better in predicting incidents  
37 and mortality rates as compared the standard patient-to-nurse measure. Yet it needs to be  
38 stressed that, based on decision curve analysis, it was not clear which measure of nursing  
39 work load will produce higher net benefit in terms of avoiding patient safety incidents and  
40 patient mortality. Current findings therefore ought to be further investigated and the findings  
41 replicated in larger, longitudinal multicenter studies.  
42  
43  
44  
45  
46  
47

48 A strength of this study is that the analyses were conducted based upon nurses' independent  
49 classifications of patients' nursing intensity. The data used was based on a scientifically tested  
50 NWL system, which enabled comparisons (16), since the patient-case mix and patient severity  
51 groups require different staff resources to maximize positive patient outcomes (4, 8, 18, 28,  
52 29). NWL consequently ought to be monitored daily using reliable instruments to ensure good  
53 patient outcomes. Such optimal resource allocation is needed for successful leadership and  
54  
55  
56  
57  
58  
59  
60

1  
2  
3 clinical governance, and it is crucial for favorable outcomes, to preventing adverse events and  
4 to reducing patient mortality.  
5  
6

7  
8 Our study nevertheless has certain limitations. The reliability of incident reports can always  
9 be questioned, despite that the HaiPro system has been in systematic use for almost ten years.  
10 Although we could control for ward-specific effects and effects of day of the week, holiday  
11 and season, there might be other confounding factors. Hospital settings are characterized by  
12 complexity regarding factors that may affect total NWL (1, 2, 13, 28-31). While a list of  
13 central organizational and contextual factors were included in the PAONCIL instrument, we  
14 did not address the effects of skill-mix, competence level or work experience on patient  
15 outcomes. Physicians' patient-related direct time and health care support should also probably  
16 be included in further studies (32). Further analyses of other patient characteristics, such as  
17 age, sex or diagnoses, were not conducted because the OPC instrument takes these variables  
18 into account. Earlier studies have shown that the OPC instrument identifies patients'  
19 individual characteristics such as functional ability, symptoms of diseases, and the effect on  
20 nursing intensity of the most central patient characteristics (16, 22). Hence, the measurement  
21 by the OPC covers the actual patient case mix for each day. However, the contribution of  
22 these aspects, especially age and sex, may be analyzed in more detail in further studies.  
23 Another limitation was that a death or an incident caused by low staffing on a ward on one  
24 day may not always occur on that same day or at that same ward. This could be explored by  
25 analyzing patient records around the critical days and at multiple wards. Although this study  
26 was the first about the relationship between the assumed optimal NWL and daily outcomes, a  
27 multi-center study with several hospitals is needed to further test the generalizability of the  
28 results.  
29  
30  
31  
32  
33  
34  
35  
36  
37  
38  
39  
40  
41  
42

### 43 **Conclusions**

44  
45  
46 This study has showed that a work situation above the assumed optimal level increases the  
47 risk for adverse events and patient mortality. However, the resources for nursing staff are  
48 limited in all organizations. Nurse managers therefore have to use available resources in the  
49 most optimal way. This study provided some new evidence to suggest that the traditional  
50 nurse staffing method, the patient-to-nurse ratio, is not necessarily preferable when it comes  
51 to controlling for patients' severity and case mix. The staffing measure based on the assumed  
52 optimal NWL may therefore be considered a novel attempt to fill a gap in the existing  
53  
54  
55  
56  
57  
58  
59  
60

1  
2  
3 knowledge on leadership and clinical governance. Efficient resource allocation is needed for  
4 successful leadership and clinical governance and it is crucial for favorable outcomes, for  
5 preventing adverse events and for reducing the mortality risk. Future research is needed to  
6 ascertain whether good patient outcomes are ensured by daily monitoring of nurses' workload  
7 with instruments like the one studied here.  
8  
9

10  
11  
12 **Contributors** LF did the literature search. LF and JS designed the study. LF collected the  
13 data. JS prepared the data and performed the analyses. LF, MK and JS contributed to data  
14 interpretation, writing, and revision of the report.  
15

16  
17 **Funding** The authors disclosed receipt of the following financial support for the research and  
18 authorship for this article: The State Research Funding of Vaasa Hospital District based on  
19 the Health Care Act (1326/2010).  
20  
21

22 **Competing interest** The authors (LF, MK, JS) declared no potential conflicts of interest with  
23 respect to the research, authorship, and/or publication of this article.  
24

25 **Data Sharing** Full descriptions of all models estimated and their estimates are found in the  
26 supplementary electronic file.  
27  
28

## 29 30 31 **References**

- 32 1 Aiken LH, Clarke SP, Sloane DM, et al. Hospital nurse staffing and patient mortality,  
33 nurse burnout, and job dissatisfaction. *JAMA* 2002;288:1987-93.
- 34 2 Aiken LH, Cimiotti JO, Sloane DM. Effects of nurse staffing and nurse education on  
35 patient deaths in hospitals with different nurse work environments. *Med Care*  
36 2011;49:1047-53.
- 37 3 Aiken LH, Sloane DM, Bruyneel L, et al. Nurse staffing and education and hospital  
38 mortality in nine European countries: a retrospective observational study. *Lancet*  
39 2014; 383: 1824-30.
- 40 4 Seago JA, Williamson A, Atwood C. Longitudinal analyses of nurse staffing and  
41 patient outcomes more about failure to rescue. *JONA* 2006;36:13-21.
- 42 5 Rafferty AM, Clarke SP, Coles J, et al. Outcomes of variation in hospital nurse  
43 staffing in English hospitals: Cross-sectional analysis of survey data and discharge  
44 records. *Int J Nurs Stud* 2007;44:175-82.
- 45 6 Zingg W, Holmes A, Dettenkofer M, et al. Hospital organization, management, and  
46 structure for prevention of health-care-associated infection: a systematic review and  
47 expert consensus. *Lancet Inf Dis* 2015;15:212-24.  
48  
49  
50  
51  
52  
53  
54  
55  
56  
57  
58  
59

- 1
  - 2
  - 3
  - 4
  - 5
  - 6
  - 7
  - 8
  - 9
  - 10
  - 11
  - 12
  - 13
  - 14
  - 15
  - 16
  - 17
  - 18
  - 19
  - 20
  - 21
  - 22
  - 23
  - 24
  - 25
  - 26
  - 27
  - 28
  - 29
  - 30
  - 31
  - 32
  - 33
  - 34
  - 35
  - 36
  - 37
  - 38
  - 39
  - 40
  - 41
  - 42
  - 43
  - 44
  - 45
  - 46
  - 47
  - 48
  - 49
  - 50
  - 51
  - 52
  - 53
  - 54
  - 55
  - 56
  - 57
  - 58
  - 59
  - 60
- 7 Lang TA, Hodge M, Olson V, et al. Nurse-patient ratios: a systematic review on the effects of nurse staffing on patient, nurse employee, and hospital outcomes. *JONA* 2004; 34: 326-37.
- 8 Needleman J, Buerhaus P, Pankratz VS, et al. Nurse staffing and inpatient hospital mortality. *N Eng J Med* 2011;364:1037-45.
- 9 Donaldson N, Bolton LB, Aydin C, et al. Impact of California's licensed nurse-patient ratios on unit-level nurse staffing and patient outcomes. *Policy Polit Nurs Prac* 2005; 6:198-10.
- 10 Kane RL, Shamliyan TA, Mueller C, et al. The association of registered nurse staffing levels and patient outcomes: systematic review and meta-analysis. *Med Care* 2007;45:1195-04.
- 11 Shulldham C, Parkin C, Firouzi A, et al. The relationship between nurse staffing and patient outcomes: A case study. *Int J Nurs Stud* 2009;46:986-92.
- 12 Van den Heede K, Sermeus W, Diya L, et al. Nurse staffing and patient outcomes in Belgian acute hospitals: cross-sectional analysis of administrative data. *Int J Nurs Stud* 2009;46:928-39.
- 13 Tarnow-Mordi WO, Hau C, Warden A, et al. Hospital mortality in relation to staff workload: a 4-year study in an adult intensive-care unit. *Lancet* 2000;356:185-89.
- 14 Lankshear AJ, Sheldon TA, Maynard A. Nurse staffing and healthcare outcomes: a systematic review on the effects of nurse staffing on patient, nurse employee, and hospital outcomes. *JONA* 2005;28:163-74.
- 15 National Institute for Health and Care Excellence. Safe Staffing for nursing in adult inpatient wards in acute hospitals. Safe staffing guideline1. 2014. [http://: www.nice.org.uk/sg1](http://www.nice.org.uk/sg1).
- 16 Rauhala A. The validity and feasibility of measurement tools for human resources management in nursing case of the RAFAELA system. Doctoral dissertation. Department of Health Policy and Management, University of Kuopio. 2008.
- 17 Adomat R & Hewison A. Assessing patient category/dependence systems for determining the nurse/patient ratio in ICU and HDU: a review of approaches. *Nurs Manag* 2004;12:299-08.
- 18 Junttila JK, Koivu A, Fagerström L, Haatainen K, Nykänen P. 2016. Hospital mortality and optimality of nursing workload: a study on predictive validity of the RAFAELA Nursing Intensity and Staffing system. *Int J Nurs Stud* 2016;60:46-53.

- 19 Rauhala A & Fagerström L. Determining optimal nursing intensity: the RAFAELA method. *Journal of Advanced Nursing* 2004;45:351-359.
- 20 Rauhala A, Kivimäki M, Fagerström L. What degree of work overload is likely to cause increased sickness absenteeism among nurse? Evidence from the RAFAELA patient classification system. *J Adv Nurs* 2007;57:286-95.
- 21 Fagerström L, Rainio A-K, Rauhala A, et al. Professional assessment of optimal nursing care intensity level a new method for resource allocation as an alternative to classical time studies. *Scand J Cari Sci* 2000;14:97-104.
- 22 Andersen MH, Lønning K, Bjørnelv GM, Fagerström L. Nursing intensity and costs of nurse staffing demonstrated by the RAFAELA system: livers. Kidney transplant recipients. *J Nurs Manag* 2016;24:798-805.
- 23 Kinnunen M. Learning from errors in organization – Factors preventing or making it possible. Doctoral thesis. University of Vaasa. *Acta Wasaensia*, 230.
- 24 Holmström A-R. Learning from Medication errors in healthcare – how to make medication error reporting systems work? Doctoral dissertation. Faculty of Pharmacy, University of Helsinki. 2017.
- 25 Vickers AJ, Elkin, EB. Decision curve analysis: a novel method for evaluating prediction models. *Med Decis Making* 2006;26:565-74.
- 26 Spetz J, Donaldson N, Aydin C, et al. How many nurses per patient? Measurements of nurse staffing in health services research. *Health Serv Res* 2008 43:1674-92.
- 27 Classen DC, Resar R, Griffin F, et al. 2011 'Global trigger tool' shows that adverse events in hospitals may be ten times greater than previously measured. *Health Aff (Millwood)* 2011;30:581-9
- 28 Needleman J, Buerhaus P, Mattke S, Stewart M, Zelevinsky K. Nurse-staffing levels and the quality of care in hospitals. *N Engl J Med* 2002;346:1715-22.
- 29 Griffiths P, Ball J, Drennan J. et al. Nurse staffing and patient outcomes: Strengths and limitations of the evidence to inform policy and practice. A review and discussion paper based on evidence reviewed for the National Institute for Health and Care Excellence Safe Staffing guideline development. *Int J Nurs Studies* 2016. DOI: <http://dx.doi.org/10.1016/j.ijnurstu.2016.03.012>
- 30 Fasioli DR, Fincke BG, Haddock KS. Going beyond patient classification systems to create an evidence-based staffing methodology. *J of Nurs Adm* 2011;41:434-9.
- 31 Cho SH, Hwang JH, Kim J. Nurse staffing and patient mortality in intensive care units. *Nurs Res* 2008;57:322-30.

1  
2  
3 32 Kerlin MP, Small DS, Cooney E, et al. A randomized trial of nighttime physician  
4 staffing in an intensive care unit. N Engl J Med 2013;368:2201-09.  
5  
6  
7  
8  
9  
10  
11  
12  
13  
14  
15  
16  
17  
18  
19  
20  
21  
22  
23  
24  
25  
26  
27  
28  
29  
30  
31  
32  
33  
34  
35  
36  
37  
38  
39  
40  
41  
42  
43  
44  
45  
46  
47  
48  
49  
50  
51  
52  
53  
54  
55  
56  
57  
58  
59  
60

For peer review only

1  
2  
3  
4  
5  
6  
7  
8  
9  
10  
11  
12  
13  
14  
15  
16  
17  
18  
19  
20  
21  
22  
23  
24  
25  
26  
27  
28  
29  
30  
31  
32  
33  
34  
35  
36  
37  
38  
39  
40  
41  
42  
43  
44  
45  
46  
47

Table 1. Assumed optimal work load, and daily mean values of workload, staff resources and adverse events per ward in the data

| Ward, id | Optimal load, lower bound | Optimal load, upper bound | OPC per nurse | Patients per nurse | OPC    | OPC per patient | Number of nurses | Incident | Patient affected | Harm to patient | >1 incident | Death | n   | Number of OPC classifications |
|----------|---------------------------|---------------------------|---------------|--------------------|--------|-----------------|------------------|----------|------------------|-----------------|-------------|-------|-----|-------------------------------|
| D1       | 18.90                     | 25.56                     | 21.06         | 1.48               | 251.22 | 14.20           | 12.03            | 0.09     | 0.06             | 0.02            | 0.01        | 0.04  | 365 | 17.70                         |
| D2       | 21.85                     | 29.55                     | 24.45         | 1.60               | 308.81 | 15.28           | 12.74            | 0.13     | 0.07             | 0.04            | 0.02        | 0.07  | 362 | 20.18                         |
| D3       | 21.88                     | 29.60                     | 25.98         | 1.89               | 355.99 | 13.75           | 13.98            | 0.26     | 0.11             | 0.08            | 0.03        | 0.08  | 365 | 25.90                         |
| D4       | 16.85                     | 22.79                     | 23.88         | 1.41               | 425.36 | 16.87           | 17.80            | 0.05     | 0.02             | 0.01            | 0.00        | 0.08  | 365 | 25.19                         |
| D5       | 15.99                     | 21.63                     | 21.92         | 1.41               | 350.84 | 15.52           | 16.15            | 0.12     | 0.08             | 0.04            | 0.02        | 0.05  | 365 | 22.62                         |
| D6       | 14.54                     | 19.66                     | 17.58         | 1.24               | 243.46 | 14.18           | 13.75            | 0.07     | 0.05             | 0.04            | 0.01        | 0.02  | 330 | 17.15                         |
| D7       | 25.47                     | 34.47                     | 33.83         | 2.48               | 343.10 | 13.62           | 10.12            | 0.04     | 0.02             | 0.01            | 0.00        | 0.00  | 364 | 25.17                         |
| D8       | 14.36                     | 20.12                     | 22.84         | 1.38               | 249.46 | 16.50           | 10.88            | 0.26     | 0.11             | 0.05            | 0.03        | 0.18  | 362 | 15.10                         |
| D9       | 20.05                     | 27.13                     | 25.12         | 1.34               | 392.29 | 18.69           | 15.76            | 0.13     | 0.05             | 0.03            | 0.02        | 0.08  | 365 | 20.96                         |
| B1       | 16.14                     | 21.83                     | 20.40         | 1.49               | 182.62 | 13.75           | 8.95             | 0.12     | 0.09             | 0.07            | 0.02        | 0.06  | 341 | 13.29                         |
| B2       | 20.37                     | 27.56                     | 25.13         | 2.00               | 290.05 | 12.61           | 11.59            | 0.23     | 0.16             | 0.10            | 0.06        | 0.08  | 365 | 23.04                         |
| B3       | 17.16                     | 23.21                     | 19.94         | 1.47               | 171.98 | 13.54           | 8.59             | 0.20     | 0.11             | 0.07            | 0.06        | 0.05  | 365 | 12.69                         |
| B4       | 19.65                     | 26.59                     | 24.16         | 1.82               | 292.34 | 13.24           | 12.11            | 0.11     | 0.07             | 0.05            | 0.01        | 0.13  | 365 | 22.09                         |
| B5       | 21.47                     | 29.04                     | 29.16         | 2.00               | 544.95 | 14.59           | 18.73            | 0.20     | 0.16             | 0.10            | 0.01        | 0.16  | 365 | 37.34                         |
| B6       | 18.50                     | 25.10                     | 23.29         | 1.77               | 355.67 | 13.18           | 15.37            | 0.08     | 0.05             | 0.03            | 0.02        | 0.08  | 365 | 26.95                         |
| B7       | 23.27                     | 31.48                     | 28.04         | 1.88               | 474.66 | 14.90           | 17.01            | 0.12     | 0.08             | 0.01            | 0.02        | 0.05  | 365 | 31.85                         |
| B8       | 18.87                     | 25.54                     | 23.17         | 1.68               | 131.87 | 14.04           | 6.21             | 0.13     | 0.10             | 0.02            | 0.02        | 0.02  | 177 | 9.45                          |
| B9       | 19.05                     | 25.78                     | 20.69         | 1.37               | 338.39 | 15.04           | 16.40            | 0.03     | 0.02             | 0.02            | 0.00        | 0.00  | 365 | 22.48                         |
| B10      | 11.51                     | 15.58                     | 13.08         | 0.75               | 134.87 | 17.39           | 10.23            | 0.04     | 0.03             | 0.01            | 0.00        | 0.00  | 362 | 7.72                          |
| B11      | 12.16                     | 16.45                     | 8.65          | 0.49               | 108.10 | 17.52           | 12.38            | 0.02     | 0.01             | 0.00            | 0.00        | 0.00  | 365 | 6.17                          |
| B12      | 17.45                     | 23.60                     | 22.45         | 1.81               | 224.67 | 12.36           | 9.87             | 0.11     | 0.07             | 0.04            | 0.01        | 0.01  | 298 | 18.12                         |
| B13      | 16.25                     | 21.98                     | 19.37         | 1.37               | 245.29 | 14.24           | 12.68            | 0.08     | 0.06             | 0.01            | 0.01        | 0.07  | 365 | 17.30                         |
| B14      | 20.02                     | 27.09                     | 19.43         | 1.50               | 273.30 | 12.97           | 14.05            | 0.10     | 0.08             | 0.01            | 0.02        | 0.11  | 365 | 21.05                         |
| C1       | 22.60                     | 30.60                     | 24.33         | 1.41               | 321.42 | 17.29           | 13.22            | 0.17     | 0.08             | 0.03            | 0.07        | 0.06  | 365 | 18.58                         |
| C2       | 18.70                     | 25.30                     | 25.15         | 1.65               | 397.05 | 15.20           | 15.93            | 0.17     | 0.09             | 0.01            | 0.05        | 0.15  | 366 | 26.12                         |
| C3       | 20.40                     | 27.60                     | 21.77         | 1.29               | 208.62 | 16.87           | 9.52             | 0.10     | 0.09             | 0.01            | 0.02        | 0.03  | 291 | 12.33                         |



|    |       |       |       |       |      |        |       |       |      |      |      |      |      |        |       |
|----|-------|-------|-------|-------|------|--------|-------|-------|------|------|------|------|------|--------|-------|
| 1  |       |       |       |       |      |        |       |       |      |      |      |      |      |        |       |
| 2  |       |       |       |       |      |        |       |       |      |      |      |      |      |        |       |
| 3  |       |       |       |       |      |        |       |       |      |      |      |      |      |        |       |
| 4  |       |       |       |       |      |        |       |       |      |      |      |      |      |        |       |
| 5  | C4    | 19.40 | 26.30 | 23.70 | 1.51 | 228.64 | 15.64 | 9.49  | 0.04 | 0.03 | 0.00 | 0.01 | 0.00 | 291    | 14.58 |
| 6  | A1    | 19.50 | 26.40 | 24.92 | 1.83 | 290.61 | 13.60 | 11.39 | 0.03 | 0.02 | 0.01 | 0.00 | 0.00 | 366    | 21.14 |
| 7  | A2    | 25.60 | 42.10 | 39.84 | 2.81 | 510.25 | 14.21 | 12.83 | 0.04 | 0.03 | 0.02 | 0.00 | 0.00 | 225    | 35.94 |
| 8  | A3    | 33.50 | 45.30 | 40.54 | 2.85 | 607.06 | 14.22 | 15.06 | 0.04 | 0.02 | 0.02 | 0.00 | 0.00 | 366    | 42.64 |
| 9  | A4    | 16.80 | 22.70 | 20.29 | 1.33 | 430.29 | 15.18 | 21.19 | 0.10 | 0.05 | 0.02 | 0.02 | 0.04 | 366    | 28.30 |
| 10 | A5    | 12.30 | 14.90 | 13.33 | 0.97 | 165.18 | 13.85 | 12.34 | 0.15 | 0.10 | 0.08 | 0.04 | 0.00 | 366    | 11.95 |
| 11 | A6    | 11.00 | 14.20 | 11.16 | 0.70 | 117.12 | 16.05 | 10.57 | 0.09 | 0.06 | 0.02 | 0.01 | 0.01 | 360    | 7.31  |
| 12 | A7    | 8.90  | 12.00 | 9.29  | 0.54 | 91.18  | 17.36 | 9.67  | 0.09 | 0.06 | 0.02 | 0.01 | 0.00 | 363    | 5.24  |
| 13 | A8    | 21.10 | 28.50 | 24.45 | 1.48 | 273.20 | 16.50 | 11.24 | 0.02 | 0.02 | 0.01 | 0.00 | 0.06 | 364    | 16.54 |
| 14 | A9    | 15.10 | 20.50 | 20.57 | 1.49 | 198.98 | 13.89 | 9.51  | 0.14 | 0.12 | 0.03 | 0.04 | 0.00 | 315    | 14.52 |
| 15 | Total | 18.52 | 25.22 | 22.41 | 1.53 | 294.59 | 14.97 | 12.93 | 0.11 | 0.07 | 0.03 | 0.02 | 0.05 | 12,475 | 19.97 |

Assumed optimal load refers to the established interval of optimal work load according to the Paoncil measurement (OPC per nurse).

The variables are described in more detail in the main text.

Table 2. Odds ratio for an adverse event (with 95% confidence interval) for four types of patient safety incidents and for patient mortality, according to nursing workload measurement by the RAFAELA system (OPC/nurse) and the standard nursing workload measurement system (patients/nurse), unadjusted and adjusted estimates

|                                  | Incident         | Patient affected | Harm to patient  | >1 incident      | Death            |
|----------------------------------|------------------|------------------|------------------|------------------|------------------|
| OPC/nurse, unadjusted model      |                  |                  |                  |                  |                  |
| Below optimum                    | 0.67 (0.58-0.78) | 0.68 (0.56-0.82) | 0.66 (0.50-0.88) | 0.67 (0.47-0.95) | 0.55 (0.43-0.70) |
| At optimum                       | 1                | 1                | 1                | 1                | 1                |
| Above optimum                    | 1.28 (1.13-1.45) | 1.13 (0.96-1.32) | 1.16 (0.93-1.45) | 1.25 (0.95-1.66) | 1.42 (1.19-1.69) |
| -2 log likelihood                | 8,577.5          | 6,169.3          | 3,523.0          | 2,406.4          | 4,958.6          |
| Akaike Information Criterion     | 8,561.5          | 6,173.3          | 3,527.0          | 2,410.4          | 4,962.6          |
| Nagelkerke R square              | 0.0106           | 0.0056           | 0.0052           | 0.0056           | 0.0160           |
| OPC/nurse, adjusted model        |                  |                  |                  |                  |                  |
| Below optimum                    | 0.79 (0.67-0.93) | 0.78 (0.64-0.96) | 0.85 (0.63-1.14) | 0.73 (0.50-1.07) | 0.78 (0.60-1.00) |
| At optimum                       | 1                | 1                | 1                | 1                | 1                |
| Above optimum                    | 1.24 (1.08-1.42) | 1.08 (0.91-1.28) | 1.11 (0.88-1.41) | 1.32 (0.98-1.79) | 1.43 (1.18-1.73) |
| -2 log likelihood                | 8,010.8          | 5,856.3          | 3,211.1          | 2,187.9          | 4,286.5          |
| Akaike Information Criterion     | 8,106.8          | 5,952.3          | 3,307.1          | 2,283.9          | 4,382.5          |
| Nagelkerke R square              | 0.0960           | 0.0688           | 0.1050           | 0.1041           | 0.1733           |
| Patients/nurse, unadjusted model |                  |                  |                  |                  |                  |
| 1st group                        | 0.74 (0.64-0.86) | 0.85 (0.71-1.02) | 0.79 (0.61-1.04) | 0.80 (0.58-1.10) | 0.47 (0.38-0.58) |
| 2nd group                        | 1                | 1                | 1                | 1                | 1                |
| 3rd group                        | 1.09 (0.95-1.25) | 1.18 (0.99-1.41) | 1.24 (0.96-1.58) | 0.95 (0.70-1.30) | 0.97 (0.81-1.17) |
| -2 log likelihood                | 8,589.1          | 6,180.9          | 3,525.1          | 2,416.5          | 4,958.8          |
| Akaike Information Criterion     | 8,593.1          | 6,184.9          | 3,529.1          | 2,420.5          | 4,962.8          |
| Nagelkerke R square              | 0.0055           | 0.0033           | 0.0045           | 0.0010           | 0.0159           |
| Patients/nurse, adjusted model   |                  |                  |                  |                  |                  |
| 1st group                        | 0.89 (0.75-1.05) | 0.98 (0.80-1.21) | 0.90 (0.66-1.23) | 1.01 (0.71-1.44) | 0.86 (0.68-1.08) |
| 2nd group                        | 1                | 1                | 1                | 1                | 1                |
| 3rd group                        | 1.13 (0.96-1.33) | 1.15 (0.94-1.41) | 1.03 (0.77-1.39) | 1.15 (0.81-1.64) | 1.20 (0.97-1.49) |
| -2 log likelihood                | 8,029.8          | 5,863.1          | 3,213.4          | 2,196.1          | 4,301.8          |
| Akaike Information Criterion     | 8,125.8          | 5,959.1          | 3,309.4          | 2,292.1          | 4,397.8          |
| Nagelkerke R square              | 0.0931           | 0.0674           | 0.1043           | 0.1004           | 0.1698           |
| Number of events                 | 1,367            | 848              | 400              | 246              | 636              |

The table summarises results from 20 different models estimated on 12,475 calendar days, representing 36 wards at four hospital units.

Adjusted model refers to models adjusted for ward-specific effects and effects of the week, holiday and season.

Estimates for ward-specific effects and effects of day of the week, holiday and season are found in the supplementary electronic file.

At optimum refers to the assumed optimal nursing intensity point with  $\pm 15\%$  deviation, as defined by the RAFAELA system.

Patients/nurse refers to a categorisation into three equally large groups.

Categories used for day of the week are Monday, Tuesday, Wednesday, Thursday, Friday, Saturday, and Sunday.

Categories used for holiday are No or Yes, where Yes refers to Easter, Midsummer, Christmas and New Year.

Categories used for season are January-March, April-May, June-August, September-October, and November-December.

## Figures legends

Figure 1. Decision curves for incident according to the OPC/nurse measure and patients/nurse measure, respectively

Figure 2. Decision curves for patient affected according to the OPC/nurse measure and patients/nurse measure, respectively

Figure 3. Decision curves for harm to patient according to the OPC/nurse measure and patients/nurse measure, respectively

Figure 4. Decision curves for >1 incident according to the OPC/nurse measure and patients/nurse measure, respectively

Figure 5. Decision curves for death according to the OPC/nurse measure and patients/nurse measure, respectively

1  
2  
3  
4  
5  
6  
7  
8  
9  
10  
11  
12  
13  
14  
15  
16  
17  
18  
19  
20  
21  
22  
23  
24  
25  
26  
27  
28  
29  
30  
31  
32  
33  
34  
35  
36  
37  
38  
39  
40  
41  
42  
43  
44  
45  
46  
47  
48  
49  
50  
51  
52  
53  
54  
55  
56  
57  
58  
59  
60

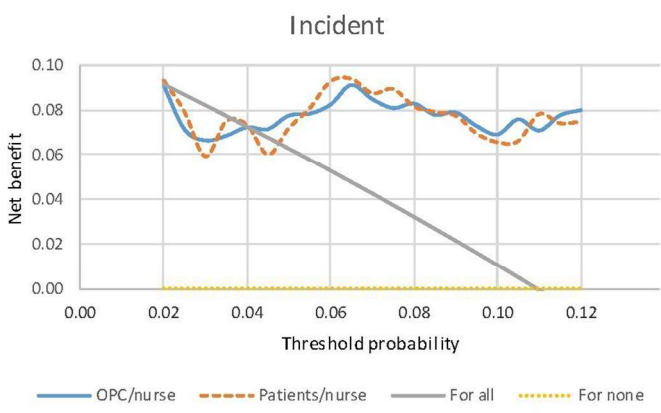

Figure 1. Decision curves for incident according to the OPC/nurse measure and patients/nurse measure, respectively

117x73mm (300 x 300 DPI)

view only

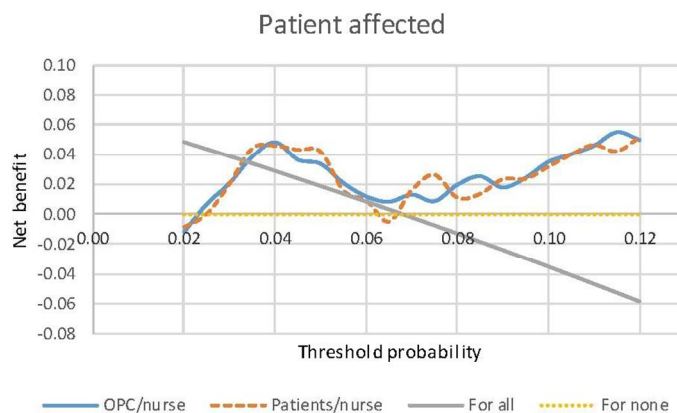

Figure 2. Decision curves for patient affected according to the OPC/nurse measure and patients/nurse measure, respectively

113x70mm (300 x 300 DPI)

1  
2  
3  
4  
5  
6  
7  
8  
9  
10  
11  
12  
13  
14  
15  
16  
17  
18  
19  
20  
21  
22  
23  
24  
25  
26  
27  
28  
29  
30  
31  
32  
33  
34  
35  
36  
37  
38  
39  
40  
41  
42  
43  
44  
45  
46  
47  
48  
49  
50  
51  
52  
53  
54  
55  
56  
57  
58  
59  
60

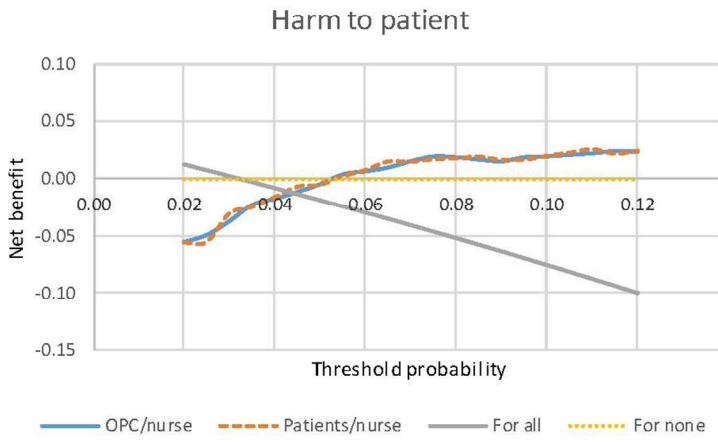

Figure 3. Decision curves for harm to patient according to the OPC/nurse measure and patients/nurse measure, respectively

107x70mm (300 x 300 DPI)

ew only

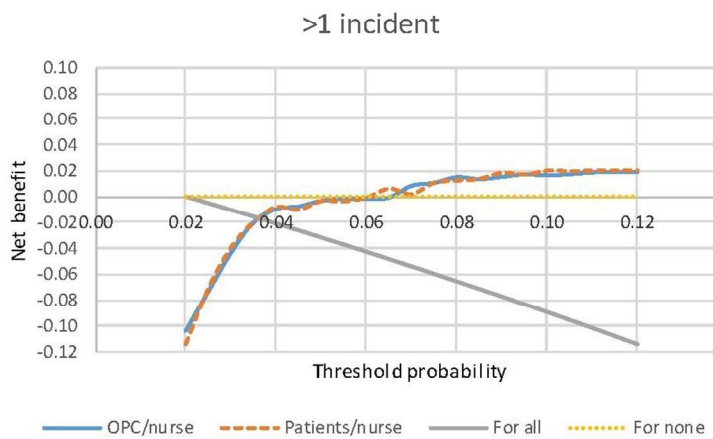

Figure 4. Decision curves for >1 incident according to the OPC/nurse measure and patients/nurse measure, respectively

107x71mm (300 x 300 DPI)

Peer review only

1  
2  
3  
4  
5  
6  
7  
8  
9  
10  
11  
12  
13  
14  
15  
16  
17  
18  
19  
20  
21  
22  
23  
24  
25  
26  
27  
28  
29  
30  
31  
32  
33  
34  
35  
36  
37  
38  
39  
40  
41  
42  
43  
44  
45  
46  
47  
48  
49  
50  
51  
52  
53  
54  
55  
56  
57  
58  
59  
60

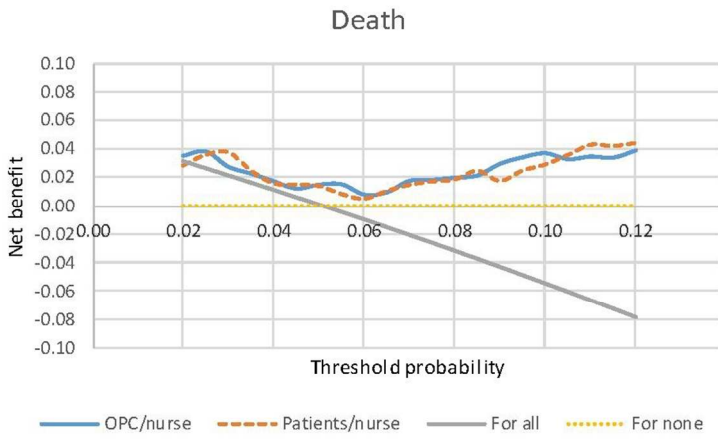

Figure 5. Decision curves for death according to the OPC/nurse measure and patients/nurse measure, respectively

107x71mm (300 x 300 DPI)

iew only



COMMENT körs på abo\_bjo\_vasa\_v1.sav

COMMENT utan kontrollvariabler

COMMENT läs resultaten enligt Table 1, första kolumnen, sex modeller, andra kolumnen, sex modeller, osv

COMMENT identisk med enbart-vasa-varianten

\*\*

LOGISTIC REGRESSION VARIABLES hand01

/METHOD=ENTER bv1

/CONTRAST (bv1)=Indicator(1)

/PRINT=CI(95)

/CRITERIA=PIN(0.05) POUT(0.10) ITERATE(20) CUT(0.5).

## Block 1: Method = Enter

### Omnibus Tests of Model Coefficients

|        |       | Chi-square | df | Sig. |
|--------|-------|------------|----|------|
| Step 1 | Step  | 66,122     | 2  | ,000 |
|        | Block | 66,122     | 2  | ,000 |
|        | Model | 66,122     | 2  | ,000 |

### Model Summary

| Step | -2 Log likelihood    | Cox & Snell R Square | Nagelkerke R Square |
|------|----------------------|----------------------|---------------------|
| 1    | 8557,46 <sup>a</sup> | ,005                 | ,011                |

a. Estimation terminated at iteration number 5 because parameter estimates changed by less than ,001.

Classification Table<sup>a</sup>

| Observed           |                              | Predicted                    |                     |                    |       |
|--------------------|------------------------------|------------------------------|---------------------|--------------------|-------|
|                    |                              | hand01 händelse nej eller ja |                     | Percentage Correct |       |
|                    |                              | 0 ingen händelse             | 1 minst en händelse |                    |       |
| Step 1             | hand01 händelse nej eller ja | 0 ingen händelse             | 11108               | 0                  | 100,0 |
|                    |                              | 1 minst en händelse          | 1367                | 0                  | ,0    |
| Overall Percentage |                              |                              |                     |                    | 89,0  |

a. The cut value is ,500

Variables in the Equation

|                         | B      | S.E. | Wald     | df | Sig. | Exp(B) | 95% C.I. for EXP(B) |       |
|-------------------------|--------|------|----------|----|------|--------|---------------------|-------|
|                         |        |      |          |    |      |        | Lower               | Upper |
| Step 1 <sup>a</sup> bv1 |        |      | 63,025   | 2  | ,000 |        |                     |       |
|                         | -,398  | ,079 | 25,244   | 1  | ,000 | ,671   | ,575                | ,784  |
|                         | ,244   | ,064 | 14,581   | 1  | ,000 | 1,277  | 1,126               | 1,447 |
| Constant                | -2,090 | ,044 | 2302,164 | 1  | ,000 | ,124   |                     |       |

a. Variable(s) entered on step 1: bv1.

```
LOGISTIC REGRESSION VARIABLES hand01
/METHOD=ENTER bv2
/CONTRAST (bv2)=Indicator(1)
/PRINT=CI(95)
/CRITERIA=PIN(0.05) POUT(0.10) ITERATE(20) CUT(0.5).
```

## Block 1: Method = Enter

Omnibus Tests of Model Coefficients

|        |       | Chi-square | df | Sig. |
|--------|-------|------------|----|------|
| Step 1 | Step  | 51,341     | 2  | ,000 |
|        | Block | 51,341     | 2  | ,000 |
|        | Model | 51,341     | 2  | ,000 |

**Model Summary**

| Step | -2 Log likelihood    | Cox & Snell R Square | Nagelkerke R Square |
|------|----------------------|----------------------|---------------------|
| 1    | 8572,24 <sup>a</sup> | ,004                 | ,008                |

a. Estimation terminated at iteration number 5 because parameter estimates changed by less than ,001.

**Classification Table<sup>a</sup>**

|                    |                              | Predicted                    |                     |                    |       |
|--------------------|------------------------------|------------------------------|---------------------|--------------------|-------|
|                    |                              | hand01 händelse nej eller ja |                     | Percentage Correct |       |
| Observed           |                              | 0 ingen händelse             | 1 minst en händelse |                    |       |
| Step 1             | hand01 händelse nej eller ja | 0 ingen händelse             | 11108               | 0                  | 100,0 |
|                    |                              | 1 minst en händelse          | 1367                | 0                  | ,0    |
| Overall Percentage |                              |                              |                     |                    | 89,0  |

a. The cut value is ,500

**Variables in the Equation**

|                     | B        | S.E.   | Wald   | df       | Sig. | Exp(B) | 95% C.I. for EXP(B) |             |
|---------------------|----------|--------|--------|----------|------|--------|---------------------|-------------|
|                     |          |        |        |          |      |        | Lower               | Upper       |
| Step 1 <sup>a</sup> |          |        |        |          |      |        |                     |             |
|                     | bv2      |        | 49,589 | 2        | ,000 |        |                     |             |
|                     | bv2(1)   | -,313  | ,081   | 14,940   | 1    | ,000   | ,732                | ,624 ,857   |
|                     | bv2(2)   | ,166   | ,073   | 5,185    | 1    | ,023   | 1,180               | 1,023 1,361 |
|                     | Constant | -2,071 | ,060   | 1188,882 | 1    | ,000   | ,126                |             |

a. Variable(s) entered on step 1: bv2.

```
LOGISTIC REGRESSION VARIABLES hand01
/METHOD=ENTER bv3
/CONTRAST (bv3)=Indicator(1)
/PRINT=CI(95)
/CRITERIA=PIN(0.05) POUT(0.10) ITERATE(20) CUT(0.5).
```

**Block 1: Method = Enter**

## Omnibus Tests of Model Coefficients

|        |       | Chi-square | df | Sig. |
|--------|-------|------------|----|------|
| Step 1 | Step  | 52,926     | 2  | ,000 |
|        | Block | 52,926     | 2  | ,000 |
|        | Model | 52,926     | 2  | ,000 |

## Model Summary

| Step | -2 Log likelihood    | Cox & Snell R Square | Nagelkerke R Square |
|------|----------------------|----------------------|---------------------|
| 1    | 8570,66 <sup>a</sup> | ,004                 | ,008                |

a. Estimation terminated at iteration number 5 because parameter estimates changed by less than ,001.

Classification Table<sup>a</sup>

|                    |                              | Predicted                    |                     |                    |       |
|--------------------|------------------------------|------------------------------|---------------------|--------------------|-------|
|                    |                              | hand01 händelse nej eller ja |                     | Percentage Correct |       |
| Observed           |                              | 0 ingen händelse             | 1 minst en händelse |                    |       |
| Step 1             | hand01 händelse nej eller ja | 0 ingen händelse             | 11108               | 0                  | 100,0 |
|                    |                              | 1 minst en händelse          | 1367                | 0                  | ,0    |
| Overall Percentage |                              |                              |                     |                    | 89,0  |

a. The cut value is ,500

## Variables in the Equation

|                         | B        | S.E.   | Wald   | df       | Sig. | Exp(B) | 95% C.I. for EXP(B) |       |       |
|-------------------------|----------|--------|--------|----------|------|--------|---------------------|-------|-------|
|                         |          |        |        |          |      |        | Lower               | Upper |       |
| Step 1 <sup>a</sup> bv3 |          |        | 47,569 | 2        | ,000 |        |                     |       |       |
|                         | bv3(1)   | -,607  | ,111   | 30,158   | 1    | ,000   | ,545                | ,439  | ,677  |
|                         | bv3(2)   | ,255   | ,075   | 11,566   | 1    | ,001   | 1,291               | 1,114 | 1,495 |
|                         | Constant | -2,079 | ,033   | 3894,857 | 1    | ,000   | ,125                |       |       |

a. Variable(s) entered on step 1: bv3.

LOGISTIC REGRESSION VARIABLES hand01

/METHOD=ENTER sv3

/CONTRAST (sv3)=Indicator(1)

/PRINT=CI(95)

/CRITERIA=PIN(0.05) POUT(0.10) ITERATE(20) CUT(0.5).

## Block 1: Method = Enter

### Omnibus Tests of Model Coefficients

|        |       | Chi-square | df | Sig. |
|--------|-------|------------|----|------|
| Step 1 | Step  | 34,433     | 2  | ,000 |
|        | Block | 34,433     | 2  | ,000 |
|        | Model | 34,433     | 2  | ,000 |

### Model Summary

| Step | -2 Log likelihood    | Cox & Snell R Square | Nagelkerke R Square |
|------|----------------------|----------------------|---------------------|
| 1    | 8589,15 <sup>a</sup> | ,003                 | ,006                |

a. Estimation terminated at iteration number 5 because parameter estimates changed by less than ,001.

### Classification Table<sup>a</sup>

|                    |                              | Predicted                    |                     |                    |       |
|--------------------|------------------------------|------------------------------|---------------------|--------------------|-------|
|                    |                              | hand01 händelse nej eller ja |                     | Percentage Correct |       |
| Observed           |                              | 0 ingen händelse             | 1 minst en händelse |                    |       |
| Step 1             | hand01 händelse nej eller ja | 0 ingen händelse             | 11108               | 0                  | 100,0 |
|                    |                              | 1 minst en händelse          | 1367                | 0                  | ,0    |
| Overall Percentage |                              |                              |                     |                    | 89,0  |

a. The cut value is ,500

### Variables in the Equation

|                     | B        | S.E.   | Wald   | df       | Sig. | Exp(B) | 95% C.I. for EXP(B) |       |       |
|---------------------|----------|--------|--------|----------|------|--------|---------------------|-------|-------|
|                     |          |        |        |          |      |        | Lower               | Upper |       |
| Step 1 <sup>a</sup> | sv3      |        | 33,479 | 2        | ,000 |        |                     |       |       |
|                     | sv3(1)   | -,298  | ,075   | 15,716   | 1    | ,000   | ,742                | ,640  | ,860  |
|                     | sv3(2)   | ,084   | ,071   | 1,412    | 1    | ,235   | 1,088               | ,947  | 1,251 |
|                     | Constant | -2,025 | ,055   | 1339,704 | 1    | ,000   | ,132                |       |       |

a. Variable(s) entered on step 1: sv3.

LOGISTIC REGRESSION VARIABLES hand01  
 /METHOD=ENTER sv5  
 /CONTRAST (sv5)=Indicator(1)  
 /PRINT=CI(95)  
 /CRITERIA=PIN(0.05) POUT(0.10) ITERATE(20) CUT(0.5).

## Block 1: Method = Enter

### Omnibus Tests of Model Coefficients

|        |       | Chi-square | df | Sig. |
|--------|-------|------------|----|------|
| Step 1 | Step  | 39,044     | 4  | ,000 |
|        | Block | 39,044     | 4  | ,000 |
|        | Model | 39,044     | 4  | ,000 |

### Model Summary

| Step | -2 Log likelihood    | Cox & Snell R Square | Nagelkerke R Square |
|------|----------------------|----------------------|---------------------|
| 1    | 8584,54 <sup>a</sup> | ,003                 | ,006                |

a. Estimation terminated at iteration number 5 because parameter estimates changed by less than ,001.

### Classification Table<sup>a</sup>

|                    |                              | Predicted                    |                     |                    |       |
|--------------------|------------------------------|------------------------------|---------------------|--------------------|-------|
|                    |                              | hand01 händelse nej eller ja |                     | Percentage Correct |       |
| Observed           |                              | 0 ingen händelse             | 1 minst en händelse |                    |       |
| Step 1             | hand01 händelse nej eller ja | 0 ingen händelse             | 11108               | 0                  | 100,0 |
|                    |                              | 1 minst en händelse          | 1367                | 0                  | ,0    |
| Overall Percentage |                              |                              |                     |                    | 89,0  |

a. The cut value is ,500

Variables in the Equation

|                         | B      | S.E. | Wald    | df | Sig. | Exp(B) | 95% C.I. for EXP(B) |       |
|-------------------------|--------|------|---------|----|------|--------|---------------------|-------|
|                         |        |      |         |    |      |        | Lower               | Upper |
| Step 1 <sup>a</sup> sv5 |        |      | 37,583  | 4  | ,000 |        |                     |       |
| sv5(1)                  | -,386  | ,093 | 17,124  | 1  | ,000 | ,680   | ,566                | ,816  |
| sv5(2)                  | -,122  | ,105 | 1,346   | 1  | ,246 | ,885   | ,721                | 1,088 |
| sv5(3)                  | -,035  | ,096 | ,134    | 1  | ,714 | ,965   | ,799                | 1,166 |
| sv5(4)                  | ,090   | ,090 | 1,012   | 1  | ,315 | 1,095  | ,918                | 1,306 |
| Constant                | -1,995 | ,071 | 781,526 | 1  | ,000 | ,136   |                     |       |

a. Variable(s) entered on step 1: sv5.

LOGISTIC REGRESSION VARIABLES hand01

/METHOD=ENTER sv7

/CONTRAST (sv7)=Indicator(1)

/PRINT=CI(95)

/CRITERIA=PIN(0.05) POUT(0.10) ITERATE(20) CUT(0.5).

## Block 1: Method = Enter

Omnibus Tests of Model Coefficients

|        |       | Chi-square | df | Sig. |
|--------|-------|------------|----|------|
| Step 1 | Step  | 45,807     | 6  | ,000 |
|        | Block | 45,807     | 6  | ,000 |
|        | Model | 45,807     | 6  | ,000 |

Model Summary

| Step | -2 Log likelihood    | Cox & Snell R Square | Nagelkerke R Square |
|------|----------------------|----------------------|---------------------|
| 1    | 8577,78 <sup>a</sup> | ,004                 | ,007                |

a. Estimation terminated at iteration number 5 because parameter estimates changed by less than ,001.

Classification Table<sup>a</sup>

| Observed           |                              | Predicted                    |                     |                    |       |
|--------------------|------------------------------|------------------------------|---------------------|--------------------|-------|
|                    |                              | hand01 händelse nej eller ja |                     | Percentage Correct |       |
|                    |                              | 0 ingen händelse             | 1 minst en händelse |                    |       |
| Step 1             | hand01 händelse nej eller ja | 0 ingen händelse             | 11108               | 0                  | 100,0 |
|                    |                              | 1 minst en händelse          | 1367                | 0                  | ,0    |
| Overall Percentage |                              |                              |                     |                    | 89,0  |

a. The cut value is ,500

Variables in the Equation

|                         | B        | S.E.   | Wald   | df      | Sig. | Exp(B) | 95% C.I. for EXP(B) |       |       |
|-------------------------|----------|--------|--------|---------|------|--------|---------------------|-------|-------|
|                         |          |        |        |         |      |        | Lower               | Upper |       |
| Step 1 <sup>a</sup> sv7 |          |        | 43,366 | 6       | ,000 |        |                     |       |       |
|                         | sv7(1)   | -,467  | ,105   | 19,690  | 1    | ,000   | ,627                | ,510  | ,771  |
|                         | sv7(2)   | -,157  | ,123   | 1,622   | 1    | ,203   | ,855                | ,672  | 1,088 |
|                         | sv7(3)   | -,147  | ,122   | 1,438   | 1    | ,231   | ,864                | ,680  | 1,097 |
|                         | sv7(4)   | -,057  | ,116   | ,247    | 1    | ,619   | ,944                | ,753  | 1,184 |
|                         | sv7(5)   | ,080   | ,105   | ,578    | 1    | ,447   | 1,083               | ,881  | 1,332 |
|                         | sv7(6)   | ,028   | ,104   | ,072    | 1    | ,789   | 1,028               | ,838  | 1,262 |
|                         | Constant | -1,978 | ,081   | 594,335 | 1    | ,000   | ,138                |       |       |

a. Variable(s) entered on step 1: sv7.

\*\*

```
LOGISTIC REGRESSION VARIABLES luonne1t1
/METHOD=ENTER bv1
/CONTRAST (bv1)=Indicator(1)
/PRINT=CI(95)
/CRITERIA=PIN(0.05) POUT(0.10) ITERATE(20) CUT(0.5).
```

### Block 1: Method = Enter

Omnibus Tests of Model Coefficients

|             | Chi-square | df | Sig. |
|-------------|------------|----|------|
| Step 1 Step | 27,580     | 2  | ,000 |
| Block       | 27,580     | 2  | ,000 |
| Model       | 27,580     | 2  | ,000 |



**Model Summary**

| Step | -2 Log likelihood    | Cox & Snell R Square | Nagelkerke R Square |
|------|----------------------|----------------------|---------------------|
| 1    | 6169,29 <sup>a</sup> | ,002                 | ,006                |

a. Estimation terminated at iteration number 6 because parameter estimates changed by less than ,001.

**Classification Table<sup>a</sup>**

|                    |                                                | Predicted                                                    |              |
|--------------------|------------------------------------------------|--------------------------------------------------------------|--------------|
|                    |                                                | luonnelt1 luonne highest = ...                               |              |
| Observed           |                                                | 0 ingen händelse eller läheltä piti                          |              |
| Step 1             | luonnelt1 luonne highest = tapahtui potilaalle | 0 ingen händelse eller läheltä piti<br>1 tapahtui potilaalle | 11627<br>848 |
| Overall Percentage |                                                |                                                              |              |

**Classification Table<sup>a</sup>**

|                    |                                                | Predicted                                                    |        |
|--------------------|------------------------------------------------|--------------------------------------------------------------|--------|
|                    |                                                | luonnelt1 luonne highest = ...                               |        |
| Observed           |                                                | 1 tapahtui potilaalle                                        |        |
| Step 1             | luonnelt1 luonne highest = tapahtui potilaalle | 0 ingen händelse eller läheltä piti<br>1 tapahtui potilaalle | 0<br>0 |
| Overall Percentage |                                                |                                                              |        |

Classification Table<sup>a</sup>

|                    |                                                |                                                              | Predicted          |
|--------------------|------------------------------------------------|--------------------------------------------------------------|--------------------|
|                    |                                                |                                                              |                    |
| Observed           |                                                |                                                              | Percentage Correct |
| Step 1             | luonnelt1 luonne highest = tapahtui potilaalle | 0 ingen händelse eller läheltä piti<br>1 tapahtui potilaalle | 100,0<br>,0        |
| Overall Percentage |                                                |                                                              | 93,2               |

a. The cut value is ,500

Variables in the Equation

|                         | B      | S.E. | Wald     | df | Sig. | Exp(B) | 95% C.I. for EXP(B) |       |
|-------------------------|--------|------|----------|----|------|--------|---------------------|-------|
|                         |        |      |          |    |      |        | Lower               | Upper |
| Step 1 <sup>a</sup> bv1 |        |      | 25,846   | 2  | ,000 |        |                     |       |
|                         | -,387  | ,097 | 15,866   | 1  | ,000 | ,679   | ,561                | ,822  |
|                         | ,119   | ,080 | 2,229    | 1  | ,135 | 1,126  | ,963                | 1,317 |
| Constant                | -2,571 | ,053 | 2346,429 | 1  | ,000 | ,076   |                     |       |

a. Variable(s) entered on step 1: bv1.

```
LOGISTIC REGRESSION VARIABLES luonnelt1
/METHOD=ENTER bv2
/CONTRAST (bv2)=Indicator(1)
/PRINT=CI(95)
/CRITERIA=PIN(0.05) POUT(0.10) ITERATE(20) CUT(0.5).
```

## Block 1: Method = Enter

Omnibus Tests of Model Coefficients

|        |       | Chi-square | df | Sig. |
|--------|-------|------------|----|------|
| Step 1 | Step  | 21,300     | 2  | ,000 |
|        | Block | 21,300     | 2  | ,000 |
|        | Model | 21,300     | 2  | ,000 |

**Model Summary**

| Step | -2 Log likelihood    | Cox & Snell R Square | Nagelkerke R Square |
|------|----------------------|----------------------|---------------------|
| 1    | 6175,57 <sup>a</sup> | ,002                 | ,004                |

a. Estimation terminated at iteration number 5 because parameter estimates changed by less than ,001.

**Classification Table<sup>a</sup>**

|                    |                                                | Predicted                                                    |              |
|--------------------|------------------------------------------------|--------------------------------------------------------------|--------------|
|                    |                                                | luonnelt1 luonne highest = ...                               |              |
| Observed           |                                                | 0 ingen händelse eller läheltä piti                          |              |
| Step 1             | luonnelt1 luonne highest = tapahtui potilaalle | 0 ingen händelse eller läheltä piti<br>1 tapahtui potilaalle | 11627<br>848 |
| Overall Percentage |                                                |                                                              |              |

**Classification Table<sup>a</sup>**

|                    |                                                | Predicted                                                    |        |
|--------------------|------------------------------------------------|--------------------------------------------------------------|--------|
|                    |                                                | luonnelt1 luonne highest = ...                               |        |
| Observed           |                                                | 1 tapahtui potilaalle                                        |        |
| Step 1             | luonnelt1 luonne highest = tapahtui potilaalle | 0 ingen händelse eller läheltä piti<br>1 tapahtui potilaalle | 0<br>0 |
| Overall Percentage |                                                |                                                              |        |

Classification Table<sup>a</sup>

|                    |                                                |                                                              | Predicted          |
|--------------------|------------------------------------------------|--------------------------------------------------------------|--------------------|
|                    |                                                |                                                              |                    |
| Observed           |                                                |                                                              | Percentage Correct |
| Step 1             | luonnelt1 luonne highest = tapahtui potilaalle | 0 ingen händelse eller läheltä piti<br>1 tapahtui potilaalle | 100,0<br>,0        |
| Overall Percentage |                                                |                                                              | 93,2               |

a. The cut value is ,500

Variables in the Equation

|                         | B        | S.E.   | Wald   | df       | Sig. | Exp(B) | 95% C.I. for EXP(B) |       |       |
|-------------------------|----------|--------|--------|----------|------|--------|---------------------|-------|-------|
|                         |          |        |        |          |      |        | Lower               | Upper |       |
| Step 1 <sup>a</sup> bv2 |          |        | 20,588 | 2        | ,000 |        |                     |       |       |
|                         | bv2(1)   | -,282  | ,099   | 8,073    | 1    | ,004   | ,755                | ,621  | ,916  |
|                         | bv2(2)   | ,096   | ,090   | 1,146    | 1    | ,284   | 1,101               | ,923  | 1,313 |
|                         | Constant | -2,571 | ,074   | 1215,978 | 1    | ,000   | ,076                |       |       |

a. Variable(s) entered on step 1: bv2.

```
LOGISTIC REGRESSION VARIABLES luonnelt1
/METHOD=ENTER bv3
/CONTRAST (bv3)=Indicator(1)
/PRINT=CI(95)
/CRITERIA=PIN(0.05) POUT(0.10) ITERATE(20) CUT(0.5).
```

## Block 1: Method = Enter

Omnibus Tests of Model Coefficients

|        |       | Chi-square | df | Sig. |
|--------|-------|------------|----|------|
| Step 1 | Step  | 21,420     | 2  | ,000 |
|        | Block | 21,420     | 2  | ,000 |
|        | Model | 21,420     | 2  | ,000 |

**Model Summary**

| Step | -2 Log likelihood    | Cox & Snell R Square | Nagelkerke R Square |
|------|----------------------|----------------------|---------------------|
| 1    | 6175,45 <sup>a</sup> | ,002                 | ,004                |

a. Estimation terminated at iteration number 6 because parameter estimates changed by less than ,001.

**Classification Table<sup>a</sup>**

|                    |                                                | Predicted                                                    |              |
|--------------------|------------------------------------------------|--------------------------------------------------------------|--------------|
|                    |                                                | luonnelt1 luonne highest = ...                               |              |
| Observed           |                                                | 0 ingen händelse eller läheltä piti                          |              |
| Step 1             | luonnelt1 luonne highest = tapahtui potilaalle | 0 ingen händelse eller läheltä piti<br>1 tapahtui potilaalle | 11627<br>848 |
| Overall Percentage |                                                |                                                              |              |

**Classification Table<sup>a</sup>**

|                    |                                                | Predicted                                                    |        |
|--------------------|------------------------------------------------|--------------------------------------------------------------|--------|
|                    |                                                | luonnelt1 luonne highest = ...                               |        |
| Observed           |                                                | 1 tapahtui potilaalle                                        |        |
| Step 1             | luonnelt1 luonne highest = tapahtui potilaalle | 0 ingen händelse eller läheltä piti<br>1 tapahtui potilaalle | 0<br>0 |
| Overall Percentage |                                                |                                                              |        |

Classification Table<sup>a</sup>

|                    |                                                |                                                              | Predicted          |
|--------------------|------------------------------------------------|--------------------------------------------------------------|--------------------|
|                    |                                                |                                                              |                    |
| Observed           |                                                |                                                              | Percentage Correct |
| Step 1             | luonnelt1 luonne highest = tapahtui potilaalle | 0 ingen händelse eller läheltä piti<br>1 tapahtui potilaalle | 100,0<br>,0        |
| Overall Percentage |                                                |                                                              | 93,2               |

a. The cut value is ,500

Variables in the Equation

|                         | B        | S.E.   | Wald   | df       | Sig. | Exp(B) | 95% C.I. for EXP(B) |       |       |
|-------------------------|----------|--------|--------|----------|------|--------|---------------------|-------|-------|
|                         |          |        |        |          |      |        | Lower               | Upper |       |
| Step 1 <sup>a</sup> bv3 |          |        | 19,526 | 2        | ,000 |        |                     |       |       |
|                         | bv3(1)   | -,481  | ,132   | 13,182   | 1    | ,000   | ,618                | ,477  | ,801  |
|                         | bv3(2)   | ,188   | ,094   | 3,996    | 1    | ,046   | 1,207               | 1,004 | 1,452 |
|                         | Constant | -2,601 | ,041   | 3967,818 | 1    | ,000   | ,074                |       |       |

a. Variable(s) entered on step 1: bv3.

```
LOGISTIC REGRESSION VARIABLES luonnelt1
/METHOD=ENTER sv3
/CONTRAST (sv3)=Indicator(1)
/PRINT=CI(95)
/CRITERIA=PIN(0.05) POUT(0.10) ITERATE(20) CUT(0.5).
```

## Block 1: Method = Enter

Omnibus Tests of Model Coefficients

|        |       | Chi-square | df | Sig. |
|--------|-------|------------|----|------|
| Step 1 | Step  | 16,005     | 2  | ,000 |
|        | Block | 16,005     | 2  | ,000 |
|        | Model | 16,005     | 2  | ,000 |

**Model Summary**

| Step | -2 Log likelihood    | Cox & Snell R Square | Nagelkerke R Square |
|------|----------------------|----------------------|---------------------|
| 1    | 6180,87 <sup>a</sup> | ,001                 | ,003                |

a. Estimation terminated at iteration number 5 because parameter estimates changed by less than ,001.

**Classification Table<sup>a</sup>**

|                    |                                                | Predicted                                                    |              |
|--------------------|------------------------------------------------|--------------------------------------------------------------|--------------|
|                    |                                                | luonnelt1 luonne highest = ...                               |              |
| Observed           |                                                | 0 ingen händelse eller läheltä piti                          |              |
| Step 1             | luonnelt1 luonne highest = tapahtui potilaalle | 0 ingen händelse eller läheltä piti<br>1 tapahtui potilaalle | 11627<br>848 |
| Overall Percentage |                                                |                                                              |              |

**Classification Table<sup>a</sup>**

|                    |                                                | Predicted                                                    |        |
|--------------------|------------------------------------------------|--------------------------------------------------------------|--------|
|                    |                                                | luonnelt1 luonne highest = ...                               |        |
| Observed           |                                                | 1 tapahtui potilaalle                                        |        |
| Step 1             | luonnelt1 luonne highest = tapahtui potilaalle | 0 ingen händelse eller läheltä piti<br>1 tapahtui potilaalle | 0<br>0 |
| Overall Percentage |                                                |                                                              |        |

Classification Table<sup>a</sup>

|                    |                                                |                                                              | Predicted          |
|--------------------|------------------------------------------------|--------------------------------------------------------------|--------------------|
| Observed           |                                                |                                                              | Percentage Correct |
| Step 1             | luonnelt1 luonne highest = tapahtui potilaalle | 0 ingen händelse eller läheltä piti<br>1 tapahtui potilaalle | 100,0<br>,0        |
| Overall Percentage |                                                |                                                              | 93,2               |

a. The cut value is ,500

Variables in the Equation

|                         | B      | S.E. | Wald     | df | Sig. | Exp(B) | 95% C.I. for EXP(B) |       |
|-------------------------|--------|------|----------|----|------|--------|---------------------|-------|
|                         |        |      |          |    |      |        | Lower               | Upper |
| Step 1 <sup>a</sup> sv3 |        |      | 15,909   | 2  | ,000 |        |                     |       |
| sv3(1)                  | -,164  | ,094 | 3,014    | 1  | ,083 | ,849   | ,706                | 1,021 |
| sv3(2)                  | ,167   | ,090 | 3,463    | 1  | ,063 | 1,181  | ,991                | 1,408 |
| Constant                | -2,626 | ,071 | 1376,464 | 1  | ,000 | ,072   |                     |       |

a. Variable(s) entered on step 1: sv3.

```
LOGISTIC REGRESSION VARIABLES luonnelt1
/METHOD=ENTER sv5
/CONTRAST (sv5)=Indicator(1)
/PRINT=CI(95)
/CRITERIA=PIN(0.05) POUT(0.10) ITERATE(20) CUT(0.5).
```

## Block 1: Method = Enter

Omnibus Tests of Model Coefficients

|        |       | Chi-square | df | Sig. |
|--------|-------|------------|----|------|
| Step 1 | Step  | 15,434     | 4  | ,004 |
|        | Block | 15,434     | 4  | ,004 |
|        | Model | 15,434     | 4  | ,004 |



**Model Summary**

| Step | -2 Log likelihood    | Cox & Snell R Square | Nagelkerke R Square |
|------|----------------------|----------------------|---------------------|
| 1    | 6181,44 <sup>a</sup> | ,001                 | ,003                |

a. Estimation terminated at iteration number 5 because parameter estimates changed by less than ,001.

**Classification Table<sup>a</sup>**

|                    |                                                | Predicted                                                    |              |
|--------------------|------------------------------------------------|--------------------------------------------------------------|--------------|
|                    |                                                | luonnelt1 luonne highest = ...                               |              |
| Observed           |                                                | 0 ingen händelse eller läheltä piti                          |              |
| Step 1             | luonnelt1 luonne highest = tapahtui potilaalle | 0 ingen händelse eller läheltä piti<br>1 tapahtui potilaalle | 11627<br>848 |
| Overall Percentage |                                                |                                                              |              |

**Classification Table<sup>a</sup>**

|                    |                                                | Predicted                                                    |        |
|--------------------|------------------------------------------------|--------------------------------------------------------------|--------|
|                    |                                                | luonnelt1 luonne highest = ...                               |        |
| Observed           |                                                | 1 tapahtui potilaalle                                        |        |
| Step 1             | luonnelt1 luonne highest = tapahtui potilaalle | 0 ingen händelse eller läheltä piti<br>1 tapahtui potilaalle | 0<br>0 |
| Overall Percentage |                                                |                                                              |        |

Classification Table<sup>a</sup>

|                    |                                                |                                                              | Predicted          |
|--------------------|------------------------------------------------|--------------------------------------------------------------|--------------------|
| Observed           |                                                |                                                              | Percentage Correct |
| Step 1             | luonnelt1 luonne highest = tapahtui potilaalle | 0 ingen händelse eller läheltä piti<br>1 tapahtui potilaalle | 100,0<br>,0        |
| Overall Percentage |                                                |                                                              | 93,2               |

a. The cut value is ,500

Variables in the Equation

|                     |          | B      | S.E. | Wald    | df | Sig. | Exp(B) | 95% C.I. for EXP(B) |       |
|---------------------|----------|--------|------|---------|----|------|--------|---------------------|-------|
|                     |          |        |      |         |    |      |        | Lower               | Upper |
| Step 1 <sup>a</sup> | sv5      |        |      | 15,236  | 4  | ,004 |        |                     |       |
|                     | sv5(1)   | -,215  | ,117 | 3,419   | 1  | ,064 | ,806   | ,642                | 1,013 |
|                     | sv5(2)   | -,099  | ,134 | ,551    | 1  | ,458 | ,905   | ,696                | 1,177 |
|                     | sv5(3)   | ,064   | ,121 | ,280    | 1  | ,597 | 1,066  | ,841                | 1,351 |
|                     | sv5(4)   | ,149   | ,114 | 1,719   | 1  | ,190 | 1,161  | ,929                | 1,451 |
|                     | Constant | -2,598 | ,091 | 810,642 | 1  | ,000 | ,074   |                     |       |

a. Variable(s) entered on step 1: sv5.

```
LOGISTIC REGRESSION VARIABLES luonnelt1
/METHOD=ENTER sv7
/CONTRAST (sv7)=Indicator(1)
/PRINT=CI(95)
/CRITERIA=PIN(0.05) POUT(0.10) ITERATE(20) CUT(0.5).
```

## Block 1: Method = Enter

Omnibus Tests of Model Coefficients

|        |       | Chi-square | df | Sig. |
|--------|-------|------------|----|------|
| Step 1 | Step  | 19,604     | 6  | ,003 |
|        | Block | 19,604     | 6  | ,003 |
|        | Model | 19,604     | 6  | ,003 |

**Model Summary**

| Step | -2 Log likelihood    | Cox & Snell R Square | Nagelkerke R Square |
|------|----------------------|----------------------|---------------------|
| 1    | 6177,27 <sup>a</sup> | ,002                 | ,004                |

a. Estimation terminated at iteration number 5 because parameter estimates changed by less than ,001.

**Classification Table<sup>a</sup>**

|                    |                                                | Predicted                                                    |              |
|--------------------|------------------------------------------------|--------------------------------------------------------------|--------------|
|                    |                                                | luonnelt1 luonne highest = ...                               |              |
| Observed           |                                                | 0 ingen händelse eller läheltä piti                          |              |
| Step 1             | luonnelt1 luonne highest = tapahtui potilaalle | 0 ingen händelse eller läheltä piti<br>1 tapahtui potilaalle | 11627<br>848 |
| Overall Percentage |                                                |                                                              |              |

**Classification Table<sup>a</sup>**

|                    |                                                | Predicted                                                    |        |
|--------------------|------------------------------------------------|--------------------------------------------------------------|--------|
|                    |                                                | luonnelt1 luonne highest = ...                               |        |
| Observed           |                                                | 1 tapahtui potilaalle                                        |        |
| Step 1             | luonnelt1 luonne highest = tapahtui potilaalle | 0 ingen händelse eller läheltä piti<br>1 tapahtui potilaalle | 0<br>0 |
| Overall Percentage |                                                |                                                              |        |

Classification Table<sup>a</sup>

|                    |                                                |                                                              | Predicted          |
|--------------------|------------------------------------------------|--------------------------------------------------------------|--------------------|
| Observed           |                                                |                                                              | Percentage Correct |
| Step 1             | luonnelt1 luonne highest = tapahtui potilaalle | 0 ingen händelse eller läheltä piti<br>1 tapahtui potilaalle | 100,0<br>,0        |
| Overall Percentage |                                                |                                                              | 93,2               |

a. The cut value is ,500

Variables in the Equation

|                     |          | B      | S.E. | Wald    | df | Sig. | Exp(B) | 95% C.I. for EXP(B) |       |
|---------------------|----------|--------|------|---------|----|------|--------|---------------------|-------|
|                     |          |        |      |         |    |      |        | Lower               | Upper |
| Step 1 <sup>a</sup> | sv7      |        |      | 19,036  | 6  | ,004 |        |                     |       |
|                     | sv7(1)   | -,344  | ,130 | 7,051   | 1  | ,008 | ,709   | ,550                | ,914  |
|                     | sv7(2)   | -,170  | ,155 | 1,200   | 1  | ,273 | ,844   | ,623                | 1,143 |
|                     | sv7(3)   | -,157  | ,154 | 1,044   | 1  | ,307 | ,855   | ,632                | 1,155 |
|                     | sv7(4)   | -,037  | ,144 | ,067    | 1  | ,796 | ,963   | ,727                | 1,278 |
|                     | sv7(5)   | ,096   | ,131 | ,531    | 1  | ,466 | 1,100  | ,851                | 1,423 |
|                     | sv7(6)   | ,037   | ,130 | ,080    | 1  | ,777 | 1,038  | ,804                | 1,339 |
|                     | Constant | -2,530 | ,101 | 622,458 | 1  | ,000 | ,080   |                     |       |

a. Variable(s) entered on step 1: sv7.

\*\*

```
LOGISTIC REGRESSION VARIABLES seurauslt3
/METHOD=ENTER bv1
/CONTRAST (bv1)=Indicator(1)
/PRINT=CI(95)
/CRITERIA=PIN(0.05) POUT(0.10) ITERATE(20) CUT(0.5).
```

### Block 1: Method = Enter

## Omnibus Tests of Model Coefficients

|        |       | Chi-square | df | Sig. |
|--------|-------|------------|----|------|
| Step 1 | Step  | 16,012     | 2  | ,000 |
|        | Block | 16,012     | 2  | ,000 |
|        | Model | 16,012     | 2  | ,000 |

## Model Summary

| Step | -2 Log likelihood    | Cox & Snell R Square | Nagelkerke R Square |
|------|----------------------|----------------------|---------------------|
| 1    | 3523,04 <sup>a</sup> | ,001                 | ,005                |

a. Estimation terminated at iteration number 6 because parameter estimates changed by less than ,001.

Classification Table<sup>a</sup>

|                    |                                                    | Predicted                                                    |
|--------------------|----------------------------------------------------|--------------------------------------------------------------|
|                    |                                                    | seurauslt3 seuraus highest = ...                             |
| Observed           |                                                    | 0 ingen händelse eller ei haittaa                            |
| Step 1             | seurauslt3 seuraus highest = haitta (i någon form) | 0 ingen händelse eller ei haittaa<br>1 haitta (i någon form) |
| Overall Percentage |                                                    | 12075<br>400                                                 |

Classification Table<sup>a</sup>

|                    |                                                    | Predicted                                                    |
|--------------------|----------------------------------------------------|--------------------------------------------------------------|
|                    |                                                    | seurauslt3 seuraus highest = ...                             |
| Observed           |                                                    | 1 haitta (i någon form)                                      |
| Step 1             | seurauslt3 seuraus highest = haitta (i någon form) | 0 ingen händelse eller ei haittaa<br>1 haitta (i någon form) |
| Overall Percentage |                                                    | 0<br>0                                                       |

Classification Table<sup>a</sup>

|                    |                                                    | Predicted                                                    |
|--------------------|----------------------------------------------------|--------------------------------------------------------------|
| Observed           |                                                    | Percentage Correct                                           |
| Step 1             | seurauslt3 seuraus highest = haitta (i någon form) | 0 ingen händelse eller ei haittaa<br>1 haitta (i någon form) |
| Overall Percentage |                                                    | 100,0<br>,0<br>96,8                                          |

a. The cut value is ,500

Variables in the Equation

|                     | B      | S.E. | Wald     | df | Sig. | Exp(B) | 95% C.I. for EXP(B) |       |
|---------------------|--------|------|----------|----|------|--------|---------------------|-------|
|                     |        |      |          |    |      |        | Lower               | Upper |
| Step 1 <sup>a</sup> |        |      |          |    |      |        |                     |       |
| bv1                 |        |      | 14,905   | 2  | ,001 |        |                     |       |
| bv1(1)              | -,409  | ,141 | 8,381    | 1  | ,004 | ,664   | ,503                | ,876  |
| bv1(2)              | ,151   | ,113 | 1,778    | 1  | ,182 | 1,163  | ,932                | 1,451 |
| Constant            | -3,369 | ,076 | 1964,339 | 1  | ,000 | ,034   |                     |       |

a. Variable(s) entered on step 1: bv1.

```
LOGISTIC REGRESSION VARIABLES seurauslt3
/METHOD=ENTER bv2
/CONTRAST (bv2)=Indicator(1)
/PRINT=CI(95)
/CRITERIA=PIN(0.05) POUT(0.10) ITERATE(20) CUT(0.5).
```

## Block 1: Method = Enter

Omnibus Tests of Model Coefficients

|        |       | Chi-square | df | Sig. |
|--------|-------|------------|----|------|
| Step 1 | Step  | 10,152     | 2  | ,006 |
|        | Block | 10,152     | 2  | ,006 |
|        | Model | 10,152     | 2  | ,006 |

**Model Summary**

| Step | -2 Log likelihood    | Cox & Snell R Square | Nagelkerke R Square |
|------|----------------------|----------------------|---------------------|
| 1    | 3528,90 <sup>a</sup> | ,001                 | ,003                |

a. Estimation terminated at iteration number 6 because parameter estimates changed by less than ,001.

**Classification Table<sup>a</sup>**

|                    |                                                    | Predicted<br>seurauslt3<br>seuraus<br>highest = ... |
|--------------------|----------------------------------------------------|-----------------------------------------------------|
| Observed           |                                                    | 0 ingen<br>händelse<br>eller ei<br>haittaa          |
| Step 1             | seurauslt3 seuraus highest = haitta (i någon form) | 12075<br>400                                        |
| Overall Percentage |                                                    |                                                     |

**Classification Table<sup>a</sup>**

|                    |                                                    | Predicted<br>seurauslt3<br>seuraus<br>highest = ... |
|--------------------|----------------------------------------------------|-----------------------------------------------------|
| Observed           |                                                    | 1 haitta (i någon form)                             |
| Step 1             | seurauslt3 seuraus highest = haitta (i någon form) | 0<br>0                                              |
| Overall Percentage |                                                    |                                                     |

**Classification Table<sup>a</sup>**

|                    |                                                    | Predicted          |
|--------------------|----------------------------------------------------|--------------------|
| Observed           |                                                    | Percentage Correct |
| Step 1             | seurauslt3 seuraus highest = haitta (i någon form) | 100,0<br>,0        |
| Overall Percentage |                                                    | 96,8               |

a. The cut value is ,500

**Variables in the Equation**

|                         | B      | S.E. | Wald    | df | Sig. | Exp(B) | 95% C.I. for EXP(B) |       |
|-------------------------|--------|------|---------|----|------|--------|---------------------|-------|
|                         |        |      |         |    |      |        | Lower               | Upper |
| Step 1 <sup>a</sup> bv2 |        |      | 9,953   | 2  | ,007 |        |                     |       |
| bv2(1)                  | -,199  | ,144 | 1,911   | 1  | ,167 | ,820   | ,619                | 1,087 |
| bv2(2)                  | ,176   | ,130 | 1,813   | 1  | ,178 | 1,192  | ,923                | 1,539 |
| Constant                | -3,424 | ,108 | 998,936 | 1  | ,000 | ,033   |                     |       |

a. Variable(s) entered on step 1: bv2.

```
LOGISTIC REGRESSION VARIABLES seurauslt3
/METHOD=ENTER bv3
/CONTRAST (bv3)=Indicator(1)
/PRINT=CI(95)
/CRITERIA=PIN(0.05) POUT(0.10) ITERATE(20) CUT(0.5).
```

## Block 1: Method = Enter

**Omnibus Tests of Model Coefficients**

|        |       | Chi-square | df | Sig. |
|--------|-------|------------|----|------|
| Step 1 | Step  | 7,005      | 2  | ,030 |
|        | Block | 7,005      | 2  | ,030 |
|        | Model | 7,005      | 2  | ,030 |

**Model Summary**

| Step | -2 Log likelihood    | Cox & Snell R Square | Nagelkerke R Square |
|------|----------------------|----------------------|---------------------|
| 1    | 3532,04 <sup>a</sup> | ,001                 | ,002                |

a. Estimation terminated at iteration number 6 because parameter estimates changed by less than ,001.



Classification Table<sup>a</sup>

| Observed           |                                                    | Predicted                                                    |                                            |
|--------------------|----------------------------------------------------|--------------------------------------------------------------|--------------------------------------------|
|                    |                                                    | seurauslt3<br>seuraus<br>highest = ...                       | 0 ingen<br>händelse<br>eller ei<br>haittaa |
| Step 1             | seurauslt3 seuraus highest = haitta (i någon form) | 0 ingen händelse eller ei haittaa<br>1 haitta (i någon form) | 12075<br>400                               |
| Overall Percentage |                                                    |                                                              |                                            |

Classification Table<sup>a</sup>

| Observed           |                                                    | Predicted                                                    |                               |
|--------------------|----------------------------------------------------|--------------------------------------------------------------|-------------------------------|
|                    |                                                    | seurauslt3<br>seuraus<br>highest = ...                       | 1 haitta (i<br>någon<br>form) |
| Step 1             | seurauslt3 seuraus highest = haitta (i någon form) | 0 ingen händelse eller ei haittaa<br>1 haitta (i någon form) | 0<br>0                        |
| Overall Percentage |                                                    |                                                              |                               |

Classification Table<sup>a</sup>

| Observed           |                                                    | Predicted             |  |
|--------------------|----------------------------------------------------|-----------------------|--|
|                    |                                                    | Percentage<br>Correct |  |
| Step 1             | seurauslt3 seuraus highest = haitta (i någon form) | 100,0<br>,0           |  |
| Overall Percentage |                                                    | 96,8                  |  |

a. The cut value is ,500

## Variables in the Equation

|                         | B      | S.E. | Wald     | df | Sig. | Exp(B) | 95% C.I. for EXP(B) |       |
|-------------------------|--------|------|----------|----|------|--------|---------------------|-------|
|                         |        |      |          |    |      |        | Lower               | Upper |
| Step 1 <sup>a</sup> bv3 |        |      | 6,364    | 2  | ,042 |        |                     |       |
| bv3(1)                  | -,413  | ,186 | 4,960    | 1  | ,026 | ,661   | ,460                | ,952  |
| bv3(2)                  | ,119   | ,137 | ,758     | 1  | ,384 | 1,127  | ,862                | 1,473 |
| Constant                | -3,385 | ,059 | 3312,839 | 1  | ,000 | ,034   |                     |       |

a. Variable(s) entered on step 1: bv3.

```
LOGISTIC REGRESSION VARIABLES seurauslt3
/METHOD=ENTER sv3
/CONTRAST (sv3)=Indicator(1)
/PRINT=CI(95)
/CRITERIA=PIN(0.05) POUT(0.10) ITERATE(20) CUT(0.5).
```

## Block 1: Method = Enter

## Omnibus Tests of Model Coefficients

|        |       | Chi-square | df | Sig. |
|--------|-------|------------|----|------|
| Step 1 | Step  | 13,919     | 2  | ,001 |
|        | Block | 13,919     | 2  | ,001 |
|        | Model | 13,919     | 2  | ,001 |

## Model Summary

| Step | -2 Log likelihood    | Cox & Snell R Square | Nagelkerke R Square |
|------|----------------------|----------------------|---------------------|
| 1    | 3525,13 <sup>a</sup> | ,001                 | ,005                |

a. Estimation terminated at iteration number 6 because parameter estimates changed by less than ,001.

Classification Table<sup>a</sup>

| Observed           |                                   | Predicted                        |
|--------------------|-----------------------------------|----------------------------------|
|                    |                                   | seurauslt3 seuraus highest = ... |
|                    | 0 ingen händelse eller ei haittaa | 12075                            |
|                    | 1 haittaa (i någon form)          | 400                              |
| Overall Percentage |                                   |                                  |

Classification Table<sup>a</sup>

| Observed           |                                   | Predicted                        |
|--------------------|-----------------------------------|----------------------------------|
|                    |                                   | seurauslt3 seuraus highest = ... |
|                    | 1 haittaa (i någon form)          |                                  |
|                    | 0 ingen händelse eller ei haittaa | 0                                |
|                    | 1 haittaa (i någon form)          | 0                                |
| Overall Percentage |                                   |                                  |

Classification Table<sup>a</sup>

| Observed           |                                   | Predicted          |
|--------------------|-----------------------------------|--------------------|
|                    |                                   | Percentage Correct |
|                    | 0 ingen händelse eller ei haittaa | 100,0              |
|                    | 1 haittaa (i någon form)          | ,0                 |
| Overall Percentage |                                   | 96,8               |

a. The cut value is ,500

## Variables in the Equation

|                         | B      | S.E. | Wald     | df | Sig. | Exp(B) | 95% C.I. for EXP(B) |       |
|-------------------------|--------|------|----------|----|------|--------|---------------------|-------|
|                         |        |      |          |    |      |        | Lower               | Upper |
| Step 1 <sup>a</sup> sv3 |        |      | 13,710   | 2  | ,001 |        |                     |       |
| sv3(1)                  | -,231  | ,137 | 2,848    | 1  | ,091 | ,794   | ,607                | 1,038 |
| sv3(2)                  | ,211   | ,127 | 2,784    | 1  | ,095 | 1,235  | ,964                | 1,583 |
| Constant                | -3,415 | ,101 | 1140,138 | 1  | ,000 | ,033   |                     |       |

a. Variable(s) entered on step 1: sv3.

```
LOGISTIC REGRESSION VARIABLES seurauslt3
/METHOD=ENTER sv5
/CONTRAST (sv5)=Indicator(1)
/PRINT=CI(95)
/CRITERIA=PIN(0.05) POUT(0.10) ITERATE(20) CUT(0.5).
```

**Block 1: Method = Enter**

## Omnibus Tests of Model Coefficients

|             | Chi-square | df | Sig. |
|-------------|------------|----|------|
| Step 1 Step | 17,212     | 4  | ,002 |
| Block       | 17,212     | 4  | ,002 |
| Model       | 17,212     | 4  | ,002 |

## Model Summary

| Step | -2 Log likelihood    | Cox & Snell R Square | Nagelkerke R Square |
|------|----------------------|----------------------|---------------------|
| 1    | 3521,84 <sup>a</sup> | ,001                 | ,006                |

a. Estimation terminated at iteration number 6 because parameter estimates changed by less than ,001.

Classification Table<sup>a</sup>

| Observed           |                                   | Predicted                        |
|--------------------|-----------------------------------|----------------------------------|
|                    |                                   | seurauslt3 seuraus highest = ... |
|                    | 0 ingen händelse eller ei haittaa | 12075                            |
|                    | 1 haittaa (i någon form)          | 400                              |
| Overall Percentage |                                   |                                  |

Classification Table<sup>a</sup>

| Observed           |                                   | Predicted                        |
|--------------------|-----------------------------------|----------------------------------|
|                    |                                   | seurauslt3 seuraus highest = ... |
|                    | 1 haittaa (i någon form)          |                                  |
|                    | 0 ingen händelse eller ei haittaa | 0                                |
|                    | 1 haittaa (i någon form)          | 0                                |
| Overall Percentage |                                   |                                  |

Classification Table<sup>a</sup>

| Observed           |                                   | Predicted          |
|--------------------|-----------------------------------|--------------------|
|                    |                                   | Percentage Correct |
|                    | 0 ingen händelse eller ei haittaa | 100,0              |
|                    | 1 haittaa (i någon form)          | ,0                 |
| Overall Percentage |                                   | 96,8               |

a. The cut value is ,500

## Variables in the Equation

|                         | B      | S.E. | Wald    | df | Sig. | Exp(B) | 95% C.I. for EXP(B) |       |
|-------------------------|--------|------|---------|----|------|--------|---------------------|-------|
|                         |        |      |         |    |      |        | Lower               | Upper |
| Step 1 <sup>a</sup> sv5 |        |      | 17,247  | 4  | ,002 |        |                     |       |
| sv5(1)                  | -,140  | ,173 | ,654    | 1  | ,419 | ,870   | ,620                | 1,220 |
| sv5(2)                  | -,147  | ,204 | ,522    | 1  | ,470 | ,863   | ,579                | 1,287 |
| sv5(3)                  | ,220   | ,176 | 1,566   | 1  | ,211 | 1,246  | ,883                | 1,759 |
| sv5(4)                  | ,356   | ,165 | 4,649   | 1  | ,031 | 1,427  | 1,033               | 1,972 |
| Constant                | -3,493 | ,137 | 651,114 | 1  | ,000 | ,030   |                     |       |

a. Variable(s) entered on step 1: sv5.

LOGISTIC REGRESSION VARIABLES seurauslt3

/METHOD=ENTER sv7

/CONTRAST (sv7)=Indicator(1)

/PRINT=CI(95)

/CRITERIA=PIN(0.05) POUT(0.10) ITERATE(20) CUT(0.5).

## Block 1: Method = Enter

## Omnibus Tests of Model Coefficients

|        |       | Chi-square | df | Sig. |
|--------|-------|------------|----|------|
| Step 1 | Step  | 16,401     | 6  | ,012 |
|        | Block | 16,401     | 6  | ,012 |
|        | Model | 16,401     | 6  | ,012 |

## Model Summary

| Step | -2 Log likelihood    | Cox & Snell R Square | Nagelkerke R Square |
|------|----------------------|----------------------|---------------------|
| 1    | 3522,65 <sup>a</sup> | ,001                 | ,005                |

a. Estimation terminated at iteration number 6 because parameter estimates changed by less than ,001.

Classification Table<sup>a</sup>

| Observed           |                                                     | Predicted                                                     |                                   |
|--------------------|-----------------------------------------------------|---------------------------------------------------------------|-----------------------------------|
|                    |                                                     | seurauslt3 seuraus highest = ...                              | 0 ingen händelse eller ei haittaa |
| Step 1             | seurauslt3 seuraus highest = haittaa (i någon form) | 0 ingen händelse eller ei haittaa<br>1 haittaa (i någon form) | 12075<br>400                      |
| Overall Percentage |                                                     |                                                               |                                   |

Classification Table<sup>a</sup>

| Observed           |                                                     | Predicted                                                     |                          |
|--------------------|-----------------------------------------------------|---------------------------------------------------------------|--------------------------|
|                    |                                                     | seurauslt3 seuraus highest = ...                              | 1 haittaa (i någon form) |
| Step 1             | seurauslt3 seuraus highest = haittaa (i någon form) | 0 ingen händelse eller ei haittaa<br>1 haittaa (i någon form) | 0<br>0                   |
| Overall Percentage |                                                     |                                                               |                          |

Classification Table<sup>a</sup>

| Observed           |                                                     | Predicted                                                     |             |
|--------------------|-----------------------------------------------------|---------------------------------------------------------------|-------------|
|                    |                                                     | Percentage Correct                                            |             |
| Step 1             | seurauslt3 seuraus highest = haittaa (i någon form) | 0 ingen händelse eller ei haittaa<br>1 haittaa (i någon form) | 100,0<br>,0 |
| Overall Percentage |                                                     |                                                               | 96,8        |

a. The cut value is ,500

## Variables in the Equation

|                         | B      | S.E. | Wald    | df | Sig. | Exp(B) | 95% C.I. for EXP(B) |       |
|-------------------------|--------|------|---------|----|------|--------|---------------------|-------|
|                         |        |      |         |    |      |        | Lower               | Upper |
| Step 1 <sup>a</sup> sv7 |        |      | 15,922  | 6  | ,014 |        |                     |       |
| sv7(1)                  | -,289  | ,191 | 2,297   | 1  | ,130 | ,749   | ,516                | 1,088 |
| sv7(2)                  | -,297  | ,238 | 1,553   | 1  | ,213 | ,743   | ,466                | 1,185 |
| sv7(3)                  | -,095  | ,224 | ,179    | 1  | ,672 | ,909   | ,586                | 1,411 |
| sv7(4)                  | ,131   | ,205 | ,407    | 1  | ,524 | 1,140  | ,763                | 1,704 |
| sv7(5)                  | ,181   | ,191 | ,904    | 1  | ,342 | 1,199  | ,825                | 1,742 |
| sv7(6)                  | ,216   | ,186 | 1,345   | 1  | ,246 | 1,241  | ,861                | 1,788 |
| Constant                | -3,399 | ,150 | 514,274 | 1  | ,000 | ,033   |                     |       |

a. Variable(s) entered on step 1: sv7.

\*\*

```
LOGISTIC REGRESSION VARIABLES handlt1
/METHOD=ENTER bv1
/CONTRAST (bv1)=Indicator(1)
/PRINT=CI(95)
/CRITERIA=PIN(0.05) POUT(0.10) ITERATE(20) CUT(0.5).
```

## Block 1: Method = Enter

## Omnibus Tests of Model Coefficients

|        |       | Chi-square | df | Sig. |
|--------|-------|------------|----|------|
| Step 1 | Step  | 12,400     | 2  | ,002 |
|        | Block | 12,400     | 2  | ,002 |
|        | Model | 12,400     | 2  | ,002 |

## Model Summary

| Step | -2 Log likelihood    | Cox & Snell R Square | Nagelkerke R Square |
|------|----------------------|----------------------|---------------------|
| 1    | 2406,38 <sup>a</sup> | ,001                 | ,006                |

a. Estimation terminated at iteration number 7 because parameter estimates changed by less than ,001.



Classification Table<sup>a</sup>

|                    |                                |                           | Predicted                      |                      |
|--------------------|--------------------------------|---------------------------|--------------------------------|----------------------|
|                    |                                |                           | handlt1 händelse larger than 1 |                      |
| Observed           |                                |                           | 0 ingen eller en händelse      | 1 mer än en händelse |
| Step 1             | handlt1 händelse larger than 1 | 0 ingen eller en händelse | 12229                          | 0                    |
|                    |                                | 1 mer än en händelse      | 246                            | 0                    |
| Overall Percentage |                                |                           |                                |                      |

Classification Table<sup>a</sup>

|                    |                                |                           | Predicted          |
|--------------------|--------------------------------|---------------------------|--------------------|
|                    |                                |                           | Percentage Correct |
| Step 1             | handlt1 händelse larger than 1 | 0 ingen eller en händelse | 100,0              |
|                    |                                | 1 mer än en händelse      | ,0                 |
| Overall Percentage |                                |                           | 98,0               |

a. The cut value is ,500

Variables in the Equation

|                         | B      | S.E. | Wald     | df | Sig. | Exp(B) | 95% C.I. for EXP(B) |       |
|-------------------------|--------|------|----------|----|------|--------|---------------------|-------|
|                         |        |      |          |    |      |        | Lower               | Upper |
| Step 1 <sup>a</sup> bv1 |        |      | 11,665   | 2  | ,003 |        |                     |       |
|                         | -,406  | ,182 | 4,969    | 1  | ,026 | ,667   | ,467                | ,952  |
|                         | ,225   | ,142 | 2,508    | 1  | ,113 | 1,253  | ,948                | 1,655 |
| Constant                | -3,898 | ,098 | 1593,079 | 1  | ,000 | ,020   |                     |       |

a. Variable(s) entered on step 1: bv1.

```
LOGISTIC REGRESSION VARIABLES handlt1
/METHOD=ENTER bv2
/CONTRAST (bv2)=Indicator(1)
/PRINT=CI(95)
/CRITERIA=PIN(0.05) POUT(0.10) ITERATE(20) CUT(0.5).
```

### Block 1: Method = Enter

## Omnibus Tests of Model Coefficients

|        |       | Chi-square | df | Sig. |
|--------|-------|------------|----|------|
| Step 1 | Step  | 9,470      | 2  | ,009 |
|        | Block | 9,470      | 2  | ,009 |
|        | Model | 9,470      | 2  | ,009 |

## Model Summary

| Step | -2 Log likelihood    | Cox & Snell R Square | Nagelkerke R Square |
|------|----------------------|----------------------|---------------------|
| 1    | 2409,31 <sup>a</sup> | ,001                 | ,004                |

a. Estimation terminated at iteration number 7 because parameter estimates changed by less than ,001.

Classification Table<sup>a</sup>

| Observed           |                                |                           | Predicted                      |                           |
|--------------------|--------------------------------|---------------------------|--------------------------------|---------------------------|
|                    |                                |                           | handlt1 händelse larger than 1 | 0 ingen eller en händelse |
| Step 1             | handlt1 händelse larger than 1 | 0 ingen eller en händelse | 12229                          | 0                         |
|                    |                                | 1 mer än en händelse      | 246                            | 0                         |
| Overall Percentage |                                |                           |                                |                           |

Classification Table<sup>a</sup>

| Observed           |                                |                           | Predicted          |
|--------------------|--------------------------------|---------------------------|--------------------|
|                    |                                |                           | Percentage Correct |
| Step 1             | handlt1 händelse larger than 1 | 0 ingen eller en händelse | 100,0              |
|                    |                                | 1 mer än en händelse      | ,0                 |
| Overall Percentage |                                |                           | 98,0               |

a. The cut value is ,500

## Variables in the Equation

|                         | B      | S.E. | Wald    | df | Sig. | Exp(B) | 95% C.I. for EXP(B) |       |
|-------------------------|--------|------|---------|----|------|--------|---------------------|-------|
|                         |        |      |         |    |      |        | Lower               | Upper |
| Step 1 <sup>a</sup> bv2 |        |      | 9,094   | 2  | ,011 |        |                     |       |
| bv2(1)                  | -,302  | ,183 | 2,706   | 1  | ,100 | ,740   | ,516                | 1,059 |
| bv2(2)                  | ,162   | ,163 | ,993    | 1  | ,319 | 1,176  | ,855                | 1,618 |
| Constant                | -3,887 | ,135 | 829,283 | 1  | ,000 | ,020   |                     |       |

a. Variable(s) entered on step 1: bv2.

LOGISTIC REGRESSION VARIABLES handlt1

/METHOD=ENTER bv3

/CONTRAST (bv3)=Indicator(1)

/PRINT=CI(95)

/CRITERIA=PIN(0.05) POUT(0.10) ITERATE(20) CUT(0.5).

## Block 1: Method = Enter

## Omnibus Tests of Model Coefficients

|        |       | Chi-square | df | Sig. |
|--------|-------|------------|----|------|
| Step 1 | Step  | 6,089      | 2  | ,048 |
|        | Block | 6,089      | 2  | ,048 |
|        | Model | 6,089      | 2  | ,048 |

## Model Summary

| Step | -2 Log likelihood    | Cox & Snell R Square | Nagelkerke R Square |
|------|----------------------|----------------------|---------------------|
| 1    | 2412,69 <sup>a</sup> | ,000                 | ,003                |

a. Estimation terminated at iteration number 7 because parameter estimates changed by less than ,001.

Classification Table<sup>a</sup>

|                    |                                | Predicted                      |                      |
|--------------------|--------------------------------|--------------------------------|----------------------|
|                    |                                | handlt1 händelse larger than 1 |                      |
| Observed           |                                | 0 ingen eller en händelse      | 1 mer än en händelse |
| Step 1             | handlt1 händelse larger than 1 | 0 ingen eller en händelse      | 12229                |
|                    |                                | 1 mer än en händelse           | 246                  |
| Overall Percentage |                                |                                |                      |

Classification Table<sup>a</sup>

|                    |                                | Predicted                 |       |
|--------------------|--------------------------------|---------------------------|-------|
|                    |                                | Percentage Correct        |       |
| Observed           |                                |                           |       |
| Step 1             | handlt1 händelse larger than 1 | 0 ingen eller en händelse | 100,0 |
|                    |                                | 1 mer än en händelse      | ,0    |
| Overall Percentage |                                |                           | 98,0  |

a. The cut value is ,500

Variables in the Equation

|                         | B        | S.E.   | Wald  | df       | Sig. | Exp(B) | 95% C.I. for EXP(B) |       |       |
|-------------------------|----------|--------|-------|----------|------|--------|---------------------|-------|-------|
|                         |          |        |       |          |      |        | Lower               | Upper |       |
| Step 1 <sup>a</sup> bv3 |          |        | 5,206 | 2        | ,074 |        |                     |       |       |
|                         | bv3(1)   | -,558  | ,248  | 5,061    | 1    | ,024   | ,572                | ,352  | ,931  |
|                         | bv3(2)   | ,018   | ,178  | ,010     | 1    | ,919   | 1,018               | ,719  | 1,443 |
|                         | Constant | -3,856 | ,074  | 2751,458 | 1    | ,000   | ,021                |       |       |

a. Variable(s) entered on step 1: bv3.

LOGISTIC REGRESSION VARIABLES handlt1

/METHOD=ENTER sv3

/CONTRAST (sv3)=Indicator(1)

/PRINT=CI(95)

/CRITERIA=PIN(0.05) POUT(0.10) ITERATE(20) CUT(0.5).

## Block 1: Method = Enter

## Omnibus Tests of Model Coefficients

|        |       | Chi-square | df | Sig. |
|--------|-------|------------|----|------|
| Step 1 | Step  | 2,281      | 2  | ,320 |
|        | Block | 2,281      | 2  | ,320 |
|        | Model | 2,281      | 2  | ,320 |

## Model Summary

| Step | -2 Log likelihood    | Cox & Snell R Square | Nagelkerke R Square |
|------|----------------------|----------------------|---------------------|
| 1    | 2416,50 <sup>a</sup> | ,000                 | ,001                |

a. Estimation terminated at iteration number 7 because parameter estimates changed by less than ,001.

Classification Table<sup>a</sup>

| Observed           |                                |                           | Predicted                      |                           |
|--------------------|--------------------------------|---------------------------|--------------------------------|---------------------------|
|                    |                                |                           | handlt1 händelse larger than 1 | 0 ingen eller en händelse |
| Step 1             | handlt1 händelse larger than 1 | 0 ingen eller en händelse | 12229                          | 0                         |
|                    |                                | 1 mer än en händelse      | 246                            | 0                         |
| Overall Percentage |                                |                           |                                |                           |

Classification Table<sup>a</sup>

| Observed           |                                |                           | Predicted          |
|--------------------|--------------------------------|---------------------------|--------------------|
|                    |                                |                           | Percentage Correct |
| Step 1             | handlt1 händelse larger than 1 | 0 ingen eller en händelse | 100,0              |
|                    |                                | 1 mer än en händelse      | ,0                 |
| Overall Percentage |                                |                           | 98,0               |

a. The cut value is ,500

## Variables in the Equation

|                         | B      | S.E. | Wald    | df | Sig. | Exp(B) | 95% C.I. for EXP(B) |       |
|-------------------------|--------|------|---------|----|------|--------|---------------------|-------|
|                         |        |      |         |    |      |        | Lower               | Upper |
| Step 1 <sup>a</sup> sv3 |        |      | 2,244   | 2  | ,326 |        |                     |       |
| sv3(1)                  | -,229  | ,165 | 1,924   | 1  | ,165 | ,795   | ,576                | 1,099 |
| sv3(2)                  | -,050  | ,160 | ,097    | 1  | ,756 | ,952   | ,696                | 1,302 |
| Constant                | -3,806 | ,122 | 977,776 | 1  | ,000 | ,022   |                     |       |

a. Variable(s) entered on step 1: sv3.

```
LOGISTIC REGRESSION VARIABLES handlt1
/METHOD=ENTER sv5
/CONTRAST (sv5)=Indicator(1)
/PRINT=CI(95)
/CRITERIA=PIN(0.05) POUT(0.10) ITERATE(20) CUT(0.5).
```

## Block 1: Method = Enter

## Omnibus Tests of Model Coefficients

|             | Chi-square | df | Sig. |
|-------------|------------|----|------|
| Step 1 Step | 4,091      | 4  | ,394 |
| Block       | 4,091      | 4  | ,394 |
| Model       | 4,091      | 4  | ,394 |

## Model Summary

| Step | -2 Log likelihood    | Cox & Snell R Square | Nagelkerke R Square |
|------|----------------------|----------------------|---------------------|
| 1    | 2414,69 <sup>a</sup> | ,000                 | ,002                |

a. Estimation terminated at iteration number 7 because parameter estimates changed by less than ,001.

Classification Table<sup>a</sup>

| Observed           |                                | Predicted                      |                      |
|--------------------|--------------------------------|--------------------------------|----------------------|
|                    |                                | handlt1 händelse larger than 1 |                      |
|                    |                                | 0 ingen eller en händelse      | 1 mer än en händelse |
| Step 1             | handlt1 händelse larger than 1 | 0 ingen eller en händelse      | 12229                |
|                    |                                | 1 mer än en händelse           | 246                  |
| Overall Percentage |                                |                                |                      |

Classification Table<sup>a</sup>

| Observed           |                                | Predicted                 |       |
|--------------------|--------------------------------|---------------------------|-------|
|                    |                                | Percentage Correct        |       |
| Step 1             | handlt1 händelse larger than 1 | 0 ingen eller en händelse | 100,0 |
|                    |                                | 1 mer än en händelse      | ,0    |
| Overall Percentage |                                |                           | 98,0  |

a. The cut value is ,500

Variables in the Equation

|                     | B      | S.E. | Wald    | df | Sig. | Exp(B) | 95% C.I. for EXP(B) |       |
|---------------------|--------|------|---------|----|------|--------|---------------------|-------|
|                     |        |      |         |    |      |        | Lower               | Upper |
| Step 1 <sup>a</sup> |        |      |         |    |      |        |                     |       |
| sv5                 |        |      | 3,932   | 4  | ,415 |        |                     |       |
| sv5(1)              | -,352  | ,205 | 2,932   | 1  | ,087 | ,703   | ,470                | 1,052 |
| sv5(2)              | -,044  | ,226 | ,037    | 1  | ,847 | ,957   | ,614                | 1,492 |
| sv5(3)              | -,070  | ,213 | ,108    | 1  | ,743 | ,933   | ,615                | 1,415 |
| sv5(4)              | -,107  | ,203 | ,278    | 1  | ,598 | ,898   | ,603                | 1,338 |
| Constant            | -3,769 | ,156 | 583,321 | 1  | ,000 | ,023   |                     |       |

a. Variable(s) entered on step 1: sv5.

```
LOGISTIC REGRESSION VARIABLES handlt1
/METHOD=ENTER sv7
/CONTRAST (sv7)=Indicator(1)
/PRINT=CI(95)
/CRITERIA=PIN(0.05) POUT(0.10) ITERATE(20) CUT(0.5).
```

**Block 1: Method = Enter**

**Omnibus Tests of Model Coefficients**

|        |       | Chi-square | df | Sig. |
|--------|-------|------------|----|------|
| Step 1 | Step  | 5,503      | 6  | ,481 |
|        | Block | 5,503      | 6  | ,481 |
|        | Model | 5,503      | 6  | ,481 |

**Model Summary**

| Step | -2 Log likelihood    | Cox & Snell R Square | Nagelkerke R Square |
|------|----------------------|----------------------|---------------------|
| 1    | 2413,28 <sup>a</sup> | ,000                 | ,003                |

a. Estimation terminated at iteration number 7 because parameter estimates changed by less than ,001.

**Classification Table<sup>a</sup>**

| Observed           |                                |                           | Predicted                      |                           |
|--------------------|--------------------------------|---------------------------|--------------------------------|---------------------------|
|                    |                                |                           | handlt1 händelse larger than 1 | 0 ingen eller en händelse |
| Step 1             | handlt1 händelse larger than 1 | 0 ingen eller en händelse | 12229                          | 0                         |
|                    |                                | 1 mer än en händelse      | 246                            | 0                         |
| Overall Percentage |                                |                           |                                |                           |

**Classification Table<sup>a</sup>**

| Observed           |                                |                           | Predicted          |
|--------------------|--------------------------------|---------------------------|--------------------|
|                    |                                |                           | Percentage Correct |
| Step 1             | handlt1 händelse larger than 1 | 0 ingen eller en händelse | 100,0              |
|                    |                                | 1 mer än en händelse      | ,0                 |
| Overall Percentage |                                |                           | 98,0               |

a. The cut value is ,500



## Variables in the Equation

|                         | B      | S.E. | Wald    | df | Sig. | Exp(B) | 95% C.I. for EXP(B) |       |
|-------------------------|--------|------|---------|----|------|--------|---------------------|-------|
|                         |        |      |         |    |      |        | Lower               | Upper |
| Step 1 <sup>a</sup> sv7 |        |      | 5,277   | 6  | ,509 |        |                     |       |
| sv7(1)                  | -,335  | ,237 | 1,996   | 1  | ,158 | ,716   | ,450                | 1,138 |
| sv7(2)                  | -,086  | ,277 | ,096    | 1  | ,757 | ,918   | ,534                | 1,579 |
| sv7(3)                  | ,021   | ,268 | ,006    | 1  | ,938 | 1,021  | ,604                | 1,727 |
| sv7(4)                  | -,086  | ,265 | ,105    | 1  | ,746 | ,918   | ,545                | 1,544 |
| sv7(5)                  | ,116   | ,237 | ,239    | 1  | ,625 | 1,123  | ,705                | 1,788 |
| sv7(6)                  | ,000   | ,238 | ,000    | 1  | ,999 | 1,000  | ,627                | 1,595 |
| Constant                | -3,838 | ,185 | 432,595 | 1  | ,000 | ,022   |                     |       |

a. Variable(s) entered on step 1: sv7.

\*\*

LOGISTIC REGRESSION VARIABLES dod01

/METHOD=ENTER bv1

/CONTRAST (bv1)=Indicator(1)

/PRINT=CI(95)

/CRITERIA=PIN(0.05) POUT(0.10) ITERATE(20) CUT(0.5).

### Block 1: Method = Enter

#### Omnibus Tests of Model Coefficients

|        |       | Chi-square | df | Sig. |
|--------|-------|------------|----|------|
| Step 1 | Step  | 66,252     | 2  | ,000 |
|        | Block | 66,252     | 2  | ,000 |
|        | Model | 66,252     | 2  | ,000 |

#### Model Summary

| Step | -2 Log likelihood    | Cox & Snell R Square | Nagelkerke R Square |
|------|----------------------|----------------------|---------------------|
| 1    | 4958,59 <sup>a</sup> | ,005                 | ,016                |

a. Estimation terminated at iteration number 6 because parameter estimates changed by less than ,001.

Classification Table<sup>a</sup>

| Observed           |                             | Predicted                   |                      |                    |       |
|--------------------|-----------------------------|-----------------------------|----------------------|--------------------|-------|
|                    |                             | dod01 dödsfall ja eller nej |                      | Percentage Correct |       |
|                    |                             | 0 inget dödsfall            | 1 minst ett dödsfall |                    |       |
| Step 1             | dod01 dödsfall ja eller nej | 0 inget dödsfall            | 11839                | 0                  | 100,0 |
|                    |                             | 1 minst ett dödsfall        | 636                  | 0                  | ,0    |
| Overall Percentage |                             |                             |                      |                    | 94,9  |

a. The cut value is ,500

Variables in the Equation

|                         | B      | S.E. | Wald     | df | Sig. | Exp(B) | 95% C.I. for EXP(B) |       |
|-------------------------|--------|------|----------|----|------|--------|---------------------|-------|
|                         |        |      |          |    |      |        | Lower               | Upper |
| Step 1 <sup>a</sup> bv1 |        |      | 60,393   | 2  | ,000 |        |                     |       |
|                         | -,594  | ,123 | 23,445   | 1  | ,000 | ,552   | ,434                | ,702  |
|                         | ,350   | ,088 | 15,616   | 1  | ,000 | 1,418  | 1,193               | 1,687 |
| Constant                | -2,933 | ,062 | 2221,217 | 1  | ,000 | ,053   |                     |       |

a. Variable(s) entered on step 1: bv1.

LOGISTIC REGRESSION VARIABLES dod01

/METHOD=ENTER bv2

/CONTRAST (bv2)=Indicator(1)

/PRINT=CI(95)

/CRITERIA=PIN(0.05) POUT(0.10) ITERATE(20) CUT(0.5).

## Block 1: Method = Enter

Omnibus Tests of Model Coefficients

|        |       | Chi-square | df | Sig. |
|--------|-------|------------|----|------|
| Step 1 | Step  | 55,598     | 2  | ,000 |
|        | Block | 55,598     | 2  | ,000 |
|        | Model | 55,598     | 2  | ,000 |

**Model Summary**

| Step | -2 Log likelihood    | Cox & Snell R Square | Nagelkerke R Square |
|------|----------------------|----------------------|---------------------|
| 1    | 4969,24 <sup>a</sup> | ,004                 | ,013                |

a. Estimation terminated at iteration number 6 because parameter estimates changed by less than ,001.

**Classification Table<sup>a</sup>**

| Observed           |                             | Predicted                   |                      |                    |       |
|--------------------|-----------------------------|-----------------------------|----------------------|--------------------|-------|
|                    |                             | dod01 dödsfall ja eller nej |                      | Percentage Correct |       |
|                    |                             | 0 inget dödsfall            | 1 minst ett dödsfall |                    |       |
| Step 1             | dod01 dödsfall ja eller nej | 0 inget dödsfall            | 11839                | 0                  | 100,0 |
|                    |                             | 1 minst ett dödsfall        | 636                  | 0                  | ,0    |
| Overall Percentage |                             |                             |                      |                    | 94,9  |

a. The cut value is ,500

**Variables in the Equation**

|                     | B        | S.E.   | Wald   | df       | Sig. | Exp(B) | 95% C.I. for EXP(B) |             |
|---------------------|----------|--------|--------|----------|------|--------|---------------------|-------------|
|                     |          |        |        |          |      |        | Lower               | Upper       |
| Step 1 <sup>a</sup> |          |        |        |          |      |        |                     |             |
|                     | bv2      |        | 52,418 | 2        | ,000 |        |                     |             |
|                     | bv2(1)   | -,407  | ,121   | 11,353   | 1    | ,001   | ,665                | ,525 ,843   |
|                     | bv2(2)   | ,312   | ,103   | 9,131    | 1    | ,003   | 1,367               | 1,116 1,674 |
|                     | Constant | -2,955 | ,087   | 1145,421 | 1    | ,000   | ,052                |             |

a. Variable(s) entered on step 1: bv2.

LOGISTIC REGRESSION VARIABLES dod01

/METHOD=ENTER bv3

/CONTRAST (bv3)=Indicator(1)

/PRINT=CI(95)

/CRITERIA=PIN(0.05) POUT(0.10) ITERATE(20) CUT(0.5).

**Block 1: Method = Enter**

## Omnibus Tests of Model Coefficients

|        |       | Chi-square | df | Sig. |
|--------|-------|------------|----|------|
| Step 1 | Step  | 56,679     | 2  | ,000 |
|        | Block | 56,679     | 2  | ,000 |
|        | Model | 56,679     | 2  | ,000 |

## Model Summary

| Step | -2 Log likelihood    | Cox & Snell R Square | Nagelkerke R Square |
|------|----------------------|----------------------|---------------------|
| 1    | 4968,16 <sup>a</sup> | ,005                 | ,014                |

a. Estimation terminated at iteration number 7 because parameter estimates changed by less than ,001.

Classification Table<sup>a</sup>

|                    |                             | Predicted                   |                      |                    |       |
|--------------------|-----------------------------|-----------------------------|----------------------|--------------------|-------|
|                    |                             | dod01 dödsfall ja eller nej |                      | Percentage Correct |       |
| Observed           |                             | 0 inget dödsfall            | 1 minst ett dödsfall |                    |       |
| Step 1             | dod01 dödsfall ja eller nej | 0 inget dödsfall            | 11839                | 0                  | 100,0 |
|                    |                             | 1 minst ett dödsfall        | 636                  | 0                  | ,0    |
| Overall Percentage |                             |                             |                      |                    | 94,9  |

a. The cut value is ,500

## Variables in the Equation

|                     | B        | S.E.   | Wald   | df       | Sig. | Exp(B) | 95% C.I. for EXP(B) |       |
|---------------------|----------|--------|--------|----------|------|--------|---------------------|-------|
|                     |          |        |        |          |      |        | Lower               | Upper |
| Step 1 <sup>a</sup> |          |        |        |          |      |        |                     |       |
|                     | bv3      |        | 46,793 | 2        | ,000 |        |                     |       |
|                     | bv3(1)   | -,980  | ,190   | 26,502   | ,000 | ,375   | ,258                | ,545  |
|                     | bv3(2)   | ,390   | ,101   | 14,975   | ,000 | 1,476  | 1,212               | 1,798 |
|                     | Constant | -2,915 | ,047   | 3780,133 | ,000 | ,054   |                     |       |

a. Variable(s) entered on step 1: bv3.

LOGISTIC REGRESSION VARIABLES dod01

/METHOD=ENTER sv3

/CONTRAST (sv3)=Indicator(1)

/PRINT=CI(95)

/CRITERIA=PIN(0.05) POUT(0.10) ITERATE(20) CUT(0.5).

## Block 1: Method = Enter

### Omnibus Tests of Model Coefficients

|        |       | Chi-square | df | Sig. |
|--------|-------|------------|----|------|
| Step 1 | Step  | 66,069     | 2  | ,000 |
|        | Block | 66,069     | 2  | ,000 |
|        | Model | 66,069     | 2  | ,000 |

### Model Summary

| Step | -2 Log likelihood    | Cox & Snell R Square | Nagelkerke R Square |
|------|----------------------|----------------------|---------------------|
| 1    | 4958,77 <sup>a</sup> | ,005                 | ,016                |

a. Estimation terminated at iteration number 6 because parameter estimates changed by less than ,001.

### Classification Table<sup>a</sup>

|                    |                             | Predicted                   |                      |                    |       |
|--------------------|-----------------------------|-----------------------------|----------------------|--------------------|-------|
|                    |                             | dod01 dödsfall ja eller nej |                      | Percentage Correct |       |
| Observed           |                             | 0 inget dödsfall            | 1 minst ett dödsfall |                    |       |
| Step 1             | dod01 dödsfall ja eller nej | 0 inget dödsfall            | 11839                | 0                  | 100,0 |
|                    |                             | 1 minst ett dödsfall        | 636                  | 0                  | ,0    |
| Overall Percentage |                             |                             |                      |                    | 94,9  |

a. The cut value is ,500

### Variables in the Equation

|                     | B        | S.E.   | Wald   | df       | Sig. | Exp(B) | 95% C.I. for EXP(B) |       |       |
|---------------------|----------|--------|--------|----------|------|--------|---------------------|-------|-------|
|                     |          |        |        |          |      |        | Lower               | Upper |       |
| Step 1 <sup>a</sup> | sv3      |        | 59,299 | 2        | ,000 |        |                     |       |       |
|                     | sv3(1)   | -,754  | ,111   | 46,314   | 1    | ,000   | ,470                | ,379  | ,584  |
|                     | sv3(2)   | -,027  | ,095   | ,083     | 1    | ,773   | ,973                | ,808  | 1,172 |
|                     | Constant | -2,683 | ,073   | 1367,544 | 1    | ,000   | ,068                |       |       |

a. Variable(s) entered on step 1: sv3.

LOGISTIC REGRESSION VARIABLES dod01  
 /METHOD=ENTER sv5  
 /CONTRAST (sv5)=Indicator(1)  
 /PRINT=CI(95)  
 /CRITERIA=PIN(0.05) POUT(0.10) ITERATE(20) CUT(0.5).

## Block 1: Method = Enter

### Omnibus Tests of Model Coefficients

|        |       | Chi-square | df | Sig. |
|--------|-------|------------|----|------|
| Step 1 | Step  | 91,578     | 4  | ,000 |
|        | Block | 91,578     | 4  | ,000 |
|        | Model | 91,578     | 4  | ,000 |

### Model Summary

| Step | -2 Log likelihood    | Cox & Snell R Square | Nagelkerke R Square |
|------|----------------------|----------------------|---------------------|
| 1    | 4933,26 <sup>a</sup> | ,007                 | ,022                |

a. Estimation terminated at iteration number 6 because parameter estimates changed by less than ,001.

### Classification Table<sup>a</sup>

|                    |                             | Predicted                   |                      |                    |
|--------------------|-----------------------------|-----------------------------|----------------------|--------------------|
|                    |                             | dod01 dödsfall ja eller nej |                      | Percentage Correct |
| Observed           |                             | 0 inget dödsfall            | 1 minst ett dödsfall |                    |
| Step 1             | dod01 dödsfall ja eller nej | 0 inget dödsfall            | 1 minst ett dödsfall |                    |
|                    |                             | 11839                       | 0                    | 100,0              |
|                    |                             | 636                         | 0                    | ,0                 |
| Overall Percentage |                             |                             |                      | 94,9               |

a. The cut value is ,500

## Variables in the Equation

|                         | B      | S.E. | Wald    | df | Sig. | Exp(B) | 95% C.I. for EXP(B) |       |
|-------------------------|--------|------|---------|----|------|--------|---------------------|-------|
|                         |        |      |         |    |      |        | Lower               | Upper |
| Step 1 <sup>a</sup> sv5 |        |      | 75,882  | 4  | ,000 |        |                     |       |
| sv5(1)                  | -1,026 | ,144 | 50,528  | 1  | ,000 | ,359   | ,270                | ,476  |
| sv5(2)                  | -,176  | ,141 | 1,557   | 1  | ,212 | ,838   | ,636                | 1,106 |
| sv5(3)                  | ,096   | ,124 | ,602    | 1  | ,438 | 1,101  | ,863                | 1,405 |
| sv5(4)                  | -,121  | ,123 | ,962    | 1  | ,327 | ,886   | ,696                | 1,128 |
| Constant                | -2,676 | ,094 | 803,889 | 1  | ,000 | ,069   |                     |       |

a. Variable(s) entered on step 1: sv5.

LOGISTIC REGRESSION VARIABLES dod01

/METHOD=ENTER sv7

/CONTRAST (sv7)=Indicator(1)

/PRINT=CI(95)

/CRITERIA=PIN(0.05) POUT(0.10) ITERATE(20) CUT(0.5).

## Block 1: Method = Enter

## Omnibus Tests of Model Coefficients

|        |       | Chi-square | df | Sig. |
|--------|-------|------------|----|------|
| Step 1 | Step  | 130,180    | 6  | ,000 |
|        | Block | 130,180    | 6  | ,000 |
|        | Model | 130,180    | 6  | ,000 |

## Model Summary

| Step | -2 Log likelihood    | Cox & Snell R Square | Nagelkerke R Square |
|------|----------------------|----------------------|---------------------|
| 1    | 4894,66 <sup>a</sup> | ,010                 | ,031                |

a. Estimation terminated at iteration number 7 because parameter estimates changed by less than ,001.

Classification Table<sup>a</sup>

| Observed           |                             | Predicted                   |                      |                    |       |
|--------------------|-----------------------------|-----------------------------|----------------------|--------------------|-------|
|                    |                             | dod01 dödsfall ja eller nej |                      | Percentage Correct |       |
|                    |                             | 0 inget dödsfall            | 1 minst ett dödsfall |                    |       |
| Step 1             | dod01 dödsfall ja eller nej | 0 inget dödsfall            | 11839                | 0                  | 100,0 |
|                    |                             | 1 minst ett dödsfall        | 636                  | 0                  | ,0    |
| Overall Percentage |                             |                             |                      |                    | 94,9  |

a. The cut value is ,500

Variables in the Equation

|                         | B      | S.E. | Wald    | df | Sig. | Exp(B) | 95% C.I. for EXP(B) |       |
|-------------------------|--------|------|---------|----|------|--------|---------------------|-------|
|                         |        |      |         |    |      |        | Lower               | Upper |
| Step 1 <sup>a</sup> sv7 |        |      | 96,884  | 6  | ,000 |        |                     |       |
| sv7(1)                  | -1,292 | ,179 | 52,022  | 1  | ,000 | ,275   | ,193                | ,390  |
| sv7(2)                  | ,001   | ,164 | ,000    | 1  | ,996 | 1,001  | ,726                | 1,380 |
| sv7(3)                  | -,043  | ,165 | ,067    | 1  | ,795 | ,958   | ,693                | 1,324 |
| sv7(4)                  | ,200   | ,151 | 1,740   | 1  | ,187 | 1,221  | ,908                | 1,642 |
| sv7(5)                  | ,221   | ,142 | 2,431   | 1  | ,119 | 1,247  | ,945                | 1,646 |
| sv7(6)                  | -,196  | ,150 | 1,705   | 1  | ,192 | ,822   | ,613                | 1,103 |
| Constant                | -2,756 | ,112 | 607,179 | 1  | ,000 | ,064   |                     |       |

a. Variable(s) entered on step 1: sv7.



COMMENT körs på abo\_bjo\_vasa\_v1.sav

COMMENT med kontroll för VASTY2 (i stället för VASTY, som användes i bara-varianten)

COMMENT läses i Table 2 som första kolumnen, sex modeller, andra kolumnen, sex modeller, osv

\*\*

LOGISTIC REGRESSION VARIABLES hand01

/METHOD=ENTER bv1 VASTY2

/CONTRAST (bv1)=Indicator(1)

/CONTRAST (VASTY2)=Indicator(1)

/PRINT=CI(95)

/CRITERIA=PIN(0.05) POUT(0.10) ITERATE(20) CUT(0.5).

## Block 1: Method = Enter

### Omnibus Tests of Model Coefficients

|        |       | Chi-square | df | Sig. |
|--------|-------|------------|----|------|
| Step 1 | Step  | 572,673    | 37 | ,000 |
|        | Block | 572,673    | 37 | ,000 |
|        | Model | 572,673    | 37 | ,000 |

### Model Summary

| Step | -2 Log likelihood    | Cox & Snell R Square | Nagelkerke R Square |
|------|----------------------|----------------------|---------------------|
| 1    | 8050,91 <sup>a</sup> | ,045                 | ,090                |

a. Estimation terminated at iteration number 6 because parameter estimates changed by less than ,001.

Classification Table<sup>a</sup>

| Observed           |                              | Predicted                    |                     |                    |       |
|--------------------|------------------------------|------------------------------|---------------------|--------------------|-------|
|                    |                              | hand01 händelse nej eller ja |                     | Percentage Correct |       |
|                    |                              | 0 ingen händelse             | 1 minst en händelse |                    |       |
| Step 1             | hand01 händelse nej eller ja | 0 ingen händelse             | 11108               | 0                  | 100,0 |
|                    |                              | 1 minst en händelse          | 1367                | 0                  | ,0    |
| Overall Percentage |                              |                              |                     |                    | 89,0  |

a. The cut value is ,500

Variables in the Equation

|                         | B      | S.E. | Wald    | df | Sig. | Exp(B) | 95% C.I. for EXP(B) |       |
|-------------------------|--------|------|---------|----|------|--------|---------------------|-------|
|                         |        |      |         |    |      |        | Lower               | Upper |
| Step 1 <sup>a</sup> bv1 |        |      | 33,531  | 2  | ,000 |        |                     |       |
|                         | -,273  | ,084 | 10,589  | 1  | ,001 | ,761   | ,646                | ,897  |
|                         | ,236   | ,069 | 11,724  | 1  | ,001 | 1,267  | 1,106               | 1,450 |
| VASTY2                  |        |      | 430,566 | 35 | ,000 |        |                     |       |
|                         | ,335   | ,240 | 1,952   | 1  | ,162 | 1,398  | ,874                | 2,237 |
|                         | 1,183  | ,216 | 29,867  | 1  | ,000 | 3,264  | 2,136               | 4,990 |
|                         | -,863  | ,304 | 8,076   | 1  | ,004 | ,422   | ,233                | ,765  |
|                         | ,149   | ,243 | ,373    | 1  | ,541 | 1,160  | ,720                | 1,869 |
|                         | -,382  | ,282 | 1,835   | 1  | ,176 | ,682   | ,393                | 1,186 |
|                         | -1,058 | ,328 | 10,418  | 1  | ,001 | ,347   | ,183                | ,660  |
|                         | 1,041  | ,220 | 22,367  | 1  | ,000 | 2,831  | 1,839               | 4,357 |
|                         | ,251   | ,240 | 1,091   | 1  | ,296 | 1,285  | ,803                | 2,058 |
|                         | ,187   | ,246 | ,575    | 1  | ,448 | 1,205  | ,744                | 1,953 |
|                         | 1,007  | ,219 | 21,086  | 1  | ,000 | 2,737  | 1,781               | 4,205 |
|                         | ,871   | ,223 | 15,290  | 1  | ,000 | 2,390  | 1,544               | 3,699 |
|                         | ,073   | ,248 | ,087    | 1  | ,768 | 1,076  | ,662                | 1,749 |
|                         | ,747   | ,224 | 11,090  | 1  | ,001 | 2,110  | 1,360               | 3,275 |
|                         | -,305  | ,268 | 1,298   | 1  | ,255 | ,737   | ,436                | 1,246 |
|                         | ,225   | ,242 | ,868    | 1  | ,351 | 1,253  | ,780                | 2,013 |
|                         | ,339   | ,288 | 1,382   | 1  | ,240 | 1,403  | ,798                | 2,468 |
|                         | -1,178 | ,356 | 10,981  | 1  | ,001 | ,308   | ,153                | ,618  |
|                         | -,881  | ,320 | 7,585   | 1  | ,006 | ,414   | ,221                | ,776  |
|                         | -1,194 | ,386 | 9,555   | 1  | ,002 | ,303   | ,142                | ,646  |
|                         | ,059   | ,261 | ,051    | 1  | ,821 | 1,061  | ,636                | 1,770 |
|                         | -,188  | ,263 | ,512    | 1  | ,474 | ,829   | ,495                | 1,387 |
|                         | ,160   | ,252 | ,400    | 1  | ,527 | 1,173  | ,715                | 1,924 |
|                         | ,731   | ,228 | 10,316  | 1  | ,001 | 2,077  | 1,330               | 3,245 |
|                         | ,530   | ,230 | 5,313   | 1  | ,021 | 1,699  | 1,083               | 2,666 |
|                         | ,123   | ,264 | ,216    | 1  | ,642 | 1,131  | ,674                | 1,897 |

## Variables in the Equation

|            | B      | S.E. | Wald    | df | Sig. | Exp(B) | 95% C.I. for EXP(B) |       |
|------------|--------|------|---------|----|------|--------|---------------------|-------|
|            |        |      |         |    |      |        | Lower               | Upper |
| VASTY2(26) | -,864  | ,337 | 6,584   | 1  | ,010 | ,421   | ,218                | ,815  |
| VASTY2(27) | -1,303 | ,356 | 13,384  | 1  | ,000 | ,272   | ,135                | ,546  |
| VASTY2(28) | -,918  | ,371 | 6,121   | 1  | ,013 | ,399   | ,193                | ,826  |
| VASTY2(29) | -,942  | ,320 | 8,679   | 1  | ,003 | ,390   | ,208                | ,730  |
| VASTY2(30) | ,003   | ,252 | ,000    | 1  | ,991 | 1,003  | ,612                | 1,643 |
| VASTY2(31) | ,518   | ,233 | 4,927   | 1  | ,026 | 1,679  | 1,062               | 2,652 |
| VASTY2(32) | -,020  | ,259 | ,006    | 1  | ,939 | ,980   | ,590                | 1,630 |
| VASTY2(33) | -,013  | ,257 | ,002    | 1  | ,961 | ,987   | ,596                | 1,635 |
| VASTY2(34) | -1,557 | ,401 | 15,103  | 1  | ,000 | ,211   | ,096                | ,462  |
| VASTY2(35) | ,348   | ,244 | 2,032   | 1  | ,154 | 1,416  | ,878                | 2,284 |
| Constant   | -2,236 | ,182 | 150,660 | 1  | ,000 | ,107   |                     |       |

a. Variable(s) entered on step 1: bv1, VASTY2.

```
LOGISTIC REGRESSION VARIABLES hand01
/METHOD=ENTER bv2 VASTY2
/CONTRAST (bv2)=Indicator(1)
/CONTRAST (VASTY2)=Indicator(1)
/PRINT=CI(95)
/CRITERIA=PIN(0.05) POUT(0.10) ITERATE(20) CUT(0.5).
```

**Block 1: Method = Enter****Omnibus Tests of Model Coefficients**

|        |       | Chi-square | df | Sig. |
|--------|-------|------------|----|------|
| Step 1 | Step  | 561,168    | 37 | ,000 |
|        | Block | 561,168    | 37 | ,000 |
|        | Model | 561,168    | 37 | ,000 |

**Model Summary**

| Step | -2 Log likelihood    | Cox & Snell R Square | Nagelkerke R Square |
|------|----------------------|----------------------|---------------------|
| 1    | 8062,41 <sup>a</sup> | ,044                 | ,088                |

a. Estimation terminated at iteration number 6 because parameter estimates changed by less than ,001.

Classification Table<sup>a</sup>

| Observed           |                              | Predicted                    |                     |                    |       |
|--------------------|------------------------------|------------------------------|---------------------|--------------------|-------|
|                    |                              | hand01 händelse nej eller ja |                     | Percentage Correct |       |
|                    |                              | 0 ingen händelse             | 1 minst en händelse |                    |       |
| Step 1             | hand01 händelse nej eller ja | 0 ingen händelse             | 11108               | 0                  | 100,0 |
|                    |                              | 1 minst en händelse          | 1367                | 0                  | ,0    |
| Overall Percentage |                              |                              |                     |                    | 89,0  |

a. The cut value is ,500

Variables in the Equation

|                     | B      | S.E. | Wald    | df | Sig. | Exp(B) | 95% C.I. for EXP(B) |       |
|---------------------|--------|------|---------|----|------|--------|---------------------|-------|
|                     |        |      |         |    |      |        | Lower               | Upper |
| Step 1 <sup>a</sup> |        |      |         |    |      |        |                     |       |
| bv2                 |        |      | 22,320  | 2  | ,000 |        |                     |       |
| bv2(1)              | -,194  | ,084 | 5,283   | 1  | ,022 | ,824   | ,698                | ,972  |
| bv2(2)              | ,157   | ,077 | 4,191   | 1  | ,041 | 1,170  | 1,007               | 1,360 |
| VASTY2              |        |      | 433,569 | 35 | ,000 |        |                     |       |
| VASTY2(1)           | ,327   | ,240 | 1,865   | 1  | ,172 | 1,387  | ,867                | 2,220 |
| VASTY2(2)           | 1,187  | ,216 | 30,073  | 1  | ,000 | 3,277  | 2,144               | 5,009 |
| VASTY2(3)           | -,816  | ,303 | 7,252   | 1  | ,007 | ,442   | ,244                | ,801  |
| VASTY2(4)           | ,181   | ,243 | ,557    | 1  | ,455 | 1,199  | ,745                | 1,929 |
| VASTY2(5)           | -,372  | ,282 | 1,741   | 1  | ,187 | ,689   | ,397                | 1,198 |
| VASTY2(6)           | -1,022 | ,327 | 9,750   | 1  | ,002 | ,360   | ,189                | ,683  |
| VASTY2(7)           | 1,088  | ,219 | 24,651  | 1  | ,000 | 2,967  | 1,932               | 4,559 |
| VASTY2(8)           | ,259   | ,240 | 1,162   | 1  | ,281 | 1,296  | ,809                | 2,075 |
| VASTY2(9)           | ,201   | ,246 | ,664    | 1  | ,415 | 1,222  | ,754                | 1,980 |
| VASTY2(10)          | 1,018  | ,219 | 21,559  | 1  | ,000 | 2,767  | 1,801               | 4,252 |
| VASTY2(11)          | ,882   | ,223 | 15,690  | 1  | ,000 | 2,415  | 1,561               | 3,736 |
| VASTY2(12)          | ,084   | ,248 | ,115    | 1  | ,735 | 1,088  | ,669                | 1,768 |
| VASTY2(13)          | ,771   | ,224 | 11,820  | 1  | ,001 | 2,162  | 1,393               | 3,355 |
| VASTY2(14)          | -,289  | ,268 | 1,166   | 1  | ,280 | ,749   | ,443                | 1,265 |
| VASTY2(15)          | ,226   | ,242 | ,874    | 1  | ,350 | 1,254  | ,780                | 2,015 |
| VASTY2(16)          | ,353   | ,288 | 1,507   | 1  | ,220 | 1,424  | ,810                | 2,502 |
| VASTY2(17)          | -1,172 | ,356 | 10,874  | 1  | ,001 | ,310   | ,154                | ,622  |
| VASTY2(18)          | -,876  | ,320 | 7,506   | 1  | ,006 | ,416   | ,223                | ,779  |
| VASTY2(19)          | -1,252 | ,385 | 10,579  | 1  | ,001 | ,286   | ,135                | ,608  |
| VASTY2(20)          | ,088   | ,261 | ,114    | 1  | ,736 | 1,092  | ,655                | 1,820 |
| VASTY2(21)          | -,179  | ,263 | ,464    | 1  | ,496 | ,836   | ,500                | 1,399 |
| VASTY2(22)          | ,156   | ,253 | ,383    | 1  | ,536 | 1,169  | ,713                | 1,918 |
| VASTY2(23)          | ,723   | ,227 | 10,093  | 1  | ,001 | 2,060  | 1,319               | 3,218 |
| VASTY2(24)          | ,564   | ,230 | 6,034   | 1  | ,014 | 1,758  | 1,121               | 2,758 |
| VASTY2(25)          | ,128   | ,264 | ,234    | 1  | ,628 | 1,136  | ,677                | 1,907 |

Variables in the Equation

|            | B      | S.E. | Wald    | df | Sig. | Exp(B) | 95% C.I. for EXP(B) |       |
|------------|--------|------|---------|----|------|--------|---------------------|-------|
|            |        |      |         |    |      |        | Lower               | Upper |
| VASTY2(26) | -,852  | ,337 | 6,410   | 1  | ,011 | ,426   | ,220                | ,825  |
| VASTY2(27) | -1,284 | ,356 | 13,006  | 1  | ,000 | ,277   | ,138                | ,556  |
| VASTY2(28) | -,907  | ,371 | 5,970   | 1  | ,015 | ,404   | ,195                | ,836  |
| VASTY2(29) | -,923  | ,320 | 8,342   | 1  | ,004 | ,397   | ,212                | ,743  |
| VASTY2(30) | ,019   | ,252 | ,005    | 1  | ,941 | 1,019  | ,622                | 1,669 |
| VASTY2(31) | ,527   | ,233 | 5,125   | 1  | ,024 | 1,694  | 1,073               | 2,674 |
| VASTY2(32) | -,025  | ,259 | ,010    | 1  | ,922 | ,975   | ,587                | 1,620 |
| VASTY2(33) | -,014  | ,257 | ,003    | 1  | ,957 | ,986   | ,596                | 1,632 |
| VASTY2(34) | -1,546 | ,401 | 14,904  | 1  | ,000 | ,213   | ,097                | ,467  |
| VASTY2(35) | ,390   | ,243 | 2,571   | 1  | ,109 | 1,477  | ,917                | 2,379 |
| Constant   | -2,238 | ,187 | 143,934 | 1  | ,000 | ,107   |                     |       |

a. Variable(s) entered on step 1: bv2, VASTY2.

```
LOGISTIC REGRESSION VARIABLES hand01
/METHOD=ENTER bv3 VASTY2
/CONTRAST (bv3)=Indicator(1)
/CONTRAST (VASTY2)=Indicator(1)
/PRINT=CI(95)
/CRITERIA=PIN(0.05) POUT(0.10) ITERATE(20) CUT(0.5).
```

### Block 1: Method = Enter

#### Omnibus Tests of Model Coefficients

|        |       | Chi-square | df | Sig. |
|--------|-------|------------|----|------|
| Step 1 | Step  | 563,072    | 37 | ,000 |
|        | Block | 563,072    | 37 | ,000 |
|        | Model | 563,072    | 37 | ,000 |

#### Model Summary

| Step | -2 Log likelihood    | Cox & Snell R Square | Nagelkerke R Square |
|------|----------------------|----------------------|---------------------|
| 1    | 8060,51 <sup>a</sup> | ,044                 | ,088                |

a. Estimation terminated at iteration number 6 because parameter estimates changed by less than ,001.

Classification Table<sup>a</sup>

| Observed           |                              | Predicted                    |                     |                    |       |
|--------------------|------------------------------|------------------------------|---------------------|--------------------|-------|
|                    |                              | hand01 händelse nej eller ja |                     | Percentage Correct |       |
|                    |                              | 0 ingen händelse             | 1 minst en händelse |                    |       |
| Step 1             | hand01 händelse nej eller ja | 0 ingen händelse             | 11108               | 0                  | 100,0 |
|                    |                              | 1 minst en händelse          | 1367                | 0                  | ,0    |
| Overall Percentage |                              |                              |                     |                    | 89,0  |

a. The cut value is ,500

Variables in the Equation

|                     | B      | S.E. | Wald    | df | Sig. | Exp(B) | 95% C.I. for EXP(B) |       |
|---------------------|--------|------|---------|----|------|--------|---------------------|-------|
|                     |        |      |         |    |      |        | Lower               | Upper |
| Step 1 <sup>a</sup> |        |      |         |    |      |        |                     |       |
| bv3                 |        |      | 23,032  | 2  | ,000 |        |                     |       |
| bv3(1)              | -,459  | ,117 | 15,260  | 1  | ,000 | ,632   | ,502                | ,796  |
| bv3(2)              | ,190   | ,083 | 5,198   | 1  | ,023 | 1,209  | 1,027               | 1,424 |
| VASTY2              |        |      | 434,065 | 35 | ,000 |        |                     |       |
| VASTY2(1)           | ,380   | ,240 | 2,505   | 1  | ,113 | 1,462  | ,914                | 2,339 |
| VASTY2(2)           | 1,217  | ,216 | 31,701  | 1  | ,000 | 3,378  | 2,211               | 5,160 |
| VASTY2(3)           | -,782  | ,303 | 6,655   | 1  | ,010 | ,457   | ,253                | ,829  |
| VASTY2(4)           | ,209   | ,243 | ,740    | 1  | ,390 | 1,233  | ,766                | 1,984 |
| VASTY2(5)           | -,338  | ,282 | 1,439   | 1  | ,230 | ,713   | ,411                | 1,239 |
| VASTY2(6)           | -1,001 | ,328 | 9,317   | 1  | ,002 | ,368   | ,193                | ,699  |
| VASTY2(7)           | 1,105  | ,221 | 24,884  | 1  | ,000 | 3,019  | 1,956               | 4,660 |
| VASTY2(8)           | ,304   | ,240 | 1,612   | 1  | ,204 | 1,356  | ,847                | 2,169 |
| VASTY2(9)           | ,248   | ,246 | 1,014   | 1  | ,314 | 1,281  | ,791                | 2,074 |
| VASTY2(10)          | 1,050  | ,219 | 23,059  | 1  | ,000 | 2,859  | 1,862               | 4,390 |
| VASTY2(11)          | ,907   | ,223 | 16,604  | 1  | ,000 | 2,478  | 1,601               | 3,833 |
| VASTY2(12)          | ,124   | ,247 | ,250    | 1  | ,617 | 1,132  | ,697                | 1,838 |
| VASTY2(13)          | ,841   | ,223 | 14,230  | 1  | ,000 | 2,319  | 1,498               | 3,590 |
| VASTY2(14)          | -,246  | ,267 | ,845    | 1  | ,358 | ,782   | ,463                | 1,321 |
| VASTY2(15)          | ,268   | ,242 | 1,228   | 1  | ,268 | 1,307  | ,814                | 2,099 |
| VASTY2(16)          | ,365   | ,289 | 1,600   | 1  | ,206 | 1,441  | ,818                | 2,538 |
| VASTY2(17)          | -1,180 | ,355 | 11,026  | 1  | ,001 | ,307   | ,153                | ,617  |
| VASTY2(18)          | -,861  | ,320 | 7,248   | 1  | ,007 | ,423   | ,226                | ,791  |
| VASTY2(19)          | -1,136 | ,388 | 8,571   | 1  | ,003 | ,321   | ,150                | ,687  |
| VASTY2(20)          | ,115   | ,261 | ,195    | 1  | ,658 | 1,122  | ,673                | 1,872 |
| VASTY2(21)          | -,156  | ,262 | ,353    | 1  | ,552 | ,856   | ,512                | 1,431 |
| VASTY2(22)          | ,112   | ,252 | ,197    | 1  | ,657 | 1,118  | ,683                | 1,832 |
| VASTY2(23)          | ,738   | ,228 | 10,514  | 1  | ,001 | 2,091  | 1,339               | 3,267 |
| VASTY2(24)          | ,588   | ,230 | 6,550   | 1  | ,010 | 1,800  | 1,148               | 2,823 |
| VASTY2(25)          | ,147   | ,264 | ,311    | 1  | ,577 | 1,159  | ,690                | 1,945 |

## Variables in the Equation

|            | B      | S.E. | Wald    | df | Sig. | Exp(B) | 95% C.I. for EXP(B) |       |
|------------|--------|------|---------|----|------|--------|---------------------|-------|
|            |        |      |         |    |      |        | Lower               | Upper |
| VASTY2(26) | -,806  | ,337 | 5,742   | 1  | ,017 | ,446   | ,231                | ,863  |
| VASTY2(27) | -1,231 | ,356 | 11,964  | 1  | ,001 | ,292   | ,145                | ,587  |
| VASTY2(28) | -,842  | ,370 | 5,165   | 1  | ,023 | ,431   | ,208                | ,891  |
| VASTY2(29) | -,916  | ,319 | 8,224   | 1  | ,004 | ,400   | ,214                | ,748  |
| VASTY2(30) | ,018   | ,252 | ,005    | 1  | ,943 | 1,018  | ,622                | 1,667 |
| VASTY2(31) | ,581   | ,234 | 6,147   | 1  | ,013 | 1,787  | 1,129               | 2,828 |
| VASTY2(32) | ,037   | ,260 | ,020    | 1  | ,888 | 1,037  | ,623                | 1,728 |
| VASTY2(33) | ,045   | ,258 | ,031    | 1  | ,860 | 1,046  | ,631                | 1,734 |
| VASTY2(34) | -1,535 | ,400 | 14,698  | 1  | ,000 | ,215   | ,098                | ,472  |
| VASTY2(35) | ,411   | ,244 | 2,829   | 1  | ,093 | 1,508  | ,934                | 2,435 |
| Constant   | -2,246 | ,180 | 155,166 | 1  | ,000 | ,106   |                     |       |

a. Variable(s) entered on step 1: bv3, VASTY2.

```
LOGISTIC REGRESSION VARIABLES hand01
/METHOD=ENTER sv3 VASTY2
/CONTRAST (sv3)=Indicator(1)
/CONTRAST (VASTY2)=Indicator(1)
/PRINT=CI(95)
/CRITERIA=PIN(0.05) POUT(0.10) ITERATE(20) CUT(0.5).
```

**Block 1: Method = Enter****Omnibus Tests of Model Coefficients**

|        |       | Chi-square | df | Sig. |
|--------|-------|------------|----|------|
| Step 1 | Step  | 550,088    | 37 | ,000 |
|        | Block | 550,088    | 37 | ,000 |
|        | Model | 550,088    | 37 | ,000 |

**Model Summary**

| Step | -2 Log likelihood    | Cox & Snell R Square | Nagelkerke R Square |
|------|----------------------|----------------------|---------------------|
| 1    | 8073,49 <sup>a</sup> | ,043                 | ,086                |

a. Estimation terminated at iteration number 6 because parameter estimates changed by less than ,001.

Classification Table<sup>a</sup>

| Observed           |                              | Predicted                    |                     |                    |       |
|--------------------|------------------------------|------------------------------|---------------------|--------------------|-------|
|                    |                              | hand01 händelse nej eller ja |                     | Percentage Correct |       |
|                    |                              | 0 ingen händelse             | 1 minst en händelse |                    |       |
| Step 1             | hand01 händelse nej eller ja | 0 ingen händelse             | 11108               | 0                  | 100,0 |
|                    |                              | 1 minst en händelse          | 1367                | 0                  | ,0    |
| Overall Percentage |                              |                              |                     |                    | 89,0  |

a. The cut value is ,500

Variables in the Equation

|                     | B      | S.E. | Wald    | df | Sig. | Exp(B) | 95% C.I. for EXP(B) |       |
|---------------------|--------|------|---------|----|------|--------|---------------------|-------|
|                     |        |      |         |    |      |        | Lower               | Upper |
| Step 1 <sup>a</sup> |        |      |         |    |      |        |                     |       |
| sv3                 |        |      | 11,508  | 2  | ,003 |        |                     |       |
| sv3(1)              | -,161  | ,085 | 3,579   | 1  | ,059 | ,851   | ,720                | 1,006 |
| sv3(2)              | ,150   | ,083 | 3,287   | 1  | ,070 | 1,162  | ,988                | 1,367 |
| VASTY2              |        |      | 430,840 | 35 | ,000 |        |                     |       |
| VASTY2(1)           | ,306   | ,240 | 1,621   | 1  | ,203 | 1,358  | ,848                | 2,176 |
| VASTY2(2)           | 1,125  | ,219 | 26,358  | 1  | ,000 | 3,081  | 2,005               | 4,734 |
| VASTY2(3)           | -,648  | ,302 | 4,609   | 1  | ,032 | ,523   | ,290                | ,945  |
| VASTY2(4)           | ,318   | ,242 | 1,726   | 1  | ,189 | 1,374  | ,855                | 2,207 |
| VASTY2(5)           | -,228  | ,283 | ,652    | 1  | ,419 | ,796   | ,457                | 1,385 |
| VASTY2(6)           | -1,074 | ,330 | 10,579  | 1  | ,001 | ,342   | ,179                | ,653  |
| VASTY2(7)           | 1,262  | ,217 | 33,909  | 1  | ,000 | 3,534  | 2,311               | 5,405 |
| VASTY2(8)           | ,400   | ,240 | 2,777   | 1  | ,096 | 1,492  | ,932                | 2,390 |
| VASTY2(9)           | ,285   | ,245 | 1,350   | 1  | ,245 | 1,330  | ,822                | 2,152 |
| VASTY2(10)          | ,957   | ,223 | 18,428  | 1  | ,000 | 2,605  | 1,682               | 4,032 |
| VASTY2(11)          | ,916   | ,222 | 16,937  | 1  | ,000 | 2,498  | 1,615               | 3,863 |
| VASTY2(12)          | ,048   | ,250 | ,037    | 1  | ,847 | 1,049  | ,643                | 1,712 |
| VASTY2(13)          | ,773   | ,227 | 11,569  | 1  | ,001 | 2,165  | 1,387               | 3,379 |
| VASTY2(14)          | -,288  | ,268 | 1,154   | 1  | ,283 | ,750   | ,443                | 1,268 |
| VASTY2(15)          | ,181   | ,245 | ,545    | 1  | ,460 | 1,198  | ,742                | 1,934 |
| VASTY2(16)          | ,364   | ,288 | 1,601   | 1  | ,206 | 1,440  | ,819                | 2,531 |
| VASTY2(17)          | -1,150 | ,356 | 10,442  | 1  | ,001 | ,317   | ,158                | ,636  |
| VASTY2(18)          | -,708  | ,325 | 4,757   | 1  | ,029 | ,493   | ,261                | ,931  |
| VASTY2(19)          | -1,244 | ,387 | 10,321  | 1  | ,001 | ,288   | ,135                | ,616  |
| VASTY2(20)          | ,090   | ,261 | ,118    | 1  | ,731 | 1,094  | ,656                | 1,825 |
| VASTY2(21)          | -,091  | ,263 | ,121    | 1  | ,728 | ,913   | ,545                | 1,527 |
| VASTY2(22)          | ,062   | ,252 | ,061    | 1  | ,804 | 1,064  | ,650                | 1,743 |
| VASTY2(23)          | ,736   | ,228 | 10,476  | 1  | ,001 | 2,089  | 1,337               | 3,262 |
| VASTY2(24)          | ,621   | ,229 | 7,361   | 1  | ,007 | 1,861  | 1,188               | 2,915 |
| VASTY2(25)          | ,178   | ,265 | ,452    | 1  | ,502 | 1,195  | ,711                | 2,007 |



**Variables in the Equation**

|            | B      | S.E. | Wald    | df | Sig. | Exp(B) | 95% C.I. for EXP(B) |       |
|------------|--------|------|---------|----|------|--------|---------------------|-------|
|            |        |      |         |    |      |        | Lower               | Upper |
| VASTY2(26) | -,800  | ,336 | 5,652   | 1  | ,017 | ,450   | ,233                | ,869  |
| VASTY2(27) | -1,284 | ,357 | 12,956  | 1  | ,000 | ,277   | ,138                | ,557  |
| VASTY2(28) | -,941  | ,374 | 6,328   | 1  | ,012 | ,390   | ,188                | ,812  |
| VASTY2(29) | -1,029 | ,324 | 10,101  | 1  | ,001 | ,357   | ,189                | ,674  |
| VASTY2(30) | ,127   | ,253 | ,251    | 1  | ,616 | 1,135  | ,692                | 1,862 |
| VASTY2(31) | ,684   | ,238 | 8,295   | 1  | ,004 | 1,983  | 1,244               | 3,159 |
| VASTY2(32) | ,107   | ,265 | ,163    | 1  | ,687 | 1,113  | ,662                | 1,870 |
| VASTY2(33) | ,132   | ,263 | ,250    | 1  | ,617 | 1,141  | ,681                | 1,910 |
| VASTY2(34) | -1,514 | ,400 | 14,299  | 1  | ,000 | ,220   | ,100                | ,482  |
| VASTY2(35) | ,470   | ,242 | 3,770   | 1  | ,052 | 1,601  | ,996                | 2,574 |
| Constant   | -2,273 | ,184 | 152,586 | 1  | ,000 | ,103   |                     |       |

a. Variable(s) entered on step 1: sv3, VASTY2.

```
LOGISTIC REGRESSION VARIABLES hand01
/METHOD=ENTER sv5 VASTY2
/CONTRAST (sv5)=Indicator(1)
/CONTRAST (VASTY2)=Indicator(1)
/PRINT=CI(95)
/CRITERIA=PIN(0.05) POUT(0.10) ITERATE(20) CUT(0.5).
```

**Block 1: Method = Enter**

**Omnibus Tests of Model Coefficients**

|        |       | Chi-square | df | Sig. |
|--------|-------|------------|----|------|
| Step 1 | Step  | 558,845    | 39 | ,000 |
|        | Block | 558,845    | 39 | ,000 |
|        | Model | 558,845    | 39 | ,000 |

**Model Summary**

| Step | -2 Log likelihood    | Cox & Snell R Square | Nagelkerke R Square |
|------|----------------------|----------------------|---------------------|
| 1    | 8064,74 <sup>a</sup> | ,044                 | ,088                |

a. Estimation terminated at iteration number 6 because parameter estimates changed by less than ,001.

Classification Table<sup>a</sup>

| Observed           |                              | Predicted                    |                     |                    |       |
|--------------------|------------------------------|------------------------------|---------------------|--------------------|-------|
|                    |                              | hand01 händelse nej eller ja |                     | Percentage Correct |       |
|                    |                              | 0 ingen händelse             | 1 minst en händelse |                    |       |
| Step 1             | hand01 händelse nej eller ja | 0 ingen händelse             | 11108               | 0                  | 100,0 |
|                    |                              | 1 minst en händelse          | 1367                | 0                  | ,0    |
| Overall Percentage |                              |                              |                     |                    | 89,0  |

a. The cut value is ,500

Variables in the Equation

|                     | B      | S.E. | Wald    | df | Sig. | Exp(B) | 95% C.I. for EXP(B) |       |
|---------------------|--------|------|---------|----|------|--------|---------------------|-------|
|                     |        |      |         |    |      |        | Lower               | Upper |
| Step 1 <sup>a</sup> |        |      |         |    |      |        |                     |       |
| sv5                 |        |      | 20,334  | 4  | ,000 |        |                     |       |
| sv5(1)              | -,231  | ,108 | 4,557   | 1  | ,033 | ,794   | ,642                | ,981  |
| sv5(2)              | -,057  | ,108 | ,279    | 1  | ,597 | ,945   | ,765                | 1,167 |
| sv5(3)              | -,053  | ,100 | ,283    | 1  | ,595 | ,948   | ,780                | 1,153 |
| sv5(4)              | ,269   | ,107 | 6,278   | 1  | ,012 | 1,309  | 1,060               | 1,616 |
| VASTY2              |        |      | 432,108 | 35 | ,000 |        |                     |       |
| VASTY2(1)           | ,291   | ,241 | 1,465   | 1  | ,226 | 1,338  | ,835                | 2,145 |
| VASTY2(2)           | 1,054  | ,221 | 22,667  | 1  | ,000 | 2,869  | 1,859               | 4,427 |
| VASTY2(3)           | -,662  | ,302 | 4,808   | 1  | ,028 | ,516   | ,286                | ,932  |
| VASTY2(4)           | ,316   | ,242 | 1,709   | 1  | ,191 | 1,372  | ,854                | 2,204 |
| VASTY2(5)           | -,250  | ,283 | ,781    | 1  | ,377 | ,779   | ,447                | 1,356 |
| VASTY2(6)           | -,199  | ,334 | 12,908  | 1  | ,000 | ,301   | ,157                | ,580  |
| VASTY2(7)           | 1,262  | ,217 | 33,934  | 1  | ,000 | 3,534  | 2,311               | 5,404 |
| VASTY2(8)           | ,376   | ,241 | 2,443   | 1  | ,118 | 1,456  | ,909                | 2,333 |
| VASTY2(9)           | ,292   | ,245 | 1,414   | 1  | ,234 | 1,339  | ,828                | 2,166 |
| VASTY2(10)          | ,871   | ,226 | 14,883  | 1  | ,000 | 2,389  | 1,535               | 3,720 |
| VASTY2(11)          | ,907   | ,223 | 16,623  | 1  | ,000 | 2,477  | 1,602               | 3,832 |
| VASTY2(12)          | ,008   | ,251 | ,001    | 1  | ,976 | 1,008  | ,616                | 1,647 |
| VASTY2(13)          | ,686   | ,230 | 8,900   | 1  | ,003 | 1,986  | 1,265               | 3,118 |
| VASTY2(14)          | -,336  | ,269 | 1,557   | 1  | ,212 | ,715   | ,422                | 1,211 |
| VASTY2(15)          | ,119   | ,246 | ,235    | 1  | ,628 | 1,127  | ,696                | 1,825 |
| VASTY2(16)          | ,317   | ,289 | 1,200   | 1  | ,273 | 1,373  | ,779                | 2,419 |
| VASTY2(17)          | -,165  | ,356 | 10,728  | 1  | ,001 | ,312   | ,155                | ,626  |
| VASTY2(18)          | -,683  | ,328 | 4,334   | 1  | ,037 | ,505   | ,265                | ,961  |
| VASTY2(19)          | -,1214 | ,390 | 9,669   | 1  | ,002 | ,297   | ,138                | ,638  |
| VASTY2(20)          | ,022   | ,263 | ,007    | 1  | ,933 | 1,022  | ,611                | 1,712 |
| VASTY2(21)          | -,098  | ,263 | ,138    | 1  | ,710 | ,907   | ,542                | 1,518 |
| VASTY2(22)          | ,053   | ,252 | ,045    | 1  | ,832 | 1,055  | ,644                | 1,727 |
| VASTY2(23)          | ,729   | ,228 | 10,258  | 1  | ,001 | 2,073  | 1,327               | 3,239 |

Variables in the Equation

|            | B      | S.E. | Wald    | df | Sig. | Exp(B) | 95% C.I. for EXP(B) |       |
|------------|--------|------|---------|----|------|--------|---------------------|-------|
|            |        |      |         |    |      |        | Lower               | Upper |
| VASTY2(24) | ,589   | ,229 | 6,595   | 1  | ,010 | 1,803  | 1,150               | 2,826 |
| VASTY2(25) | ,156   | ,265 | ,346    | 1  | ,556 | 1,169  | ,695                | 1,964 |
| VASTY2(26) | -,806  | ,336 | 5,735   | 1  | ,017 | ,447   | ,231                | ,864  |
| VASTY2(27) | -1,343 | ,358 | 14,078  | 1  | ,000 | ,261   | ,129                | ,527  |
| VASTY2(28) | -1,089 | ,378 | 8,296   | 1  | ,004 | ,337   | ,160                | ,706  |
| VASTY2(29) | -1,185 | ,329 | 12,977  | 1  | ,000 | ,306   | ,160                | ,583  |
| VASTY2(30) | ,113   | ,253 | ,200    | 1  | ,655 | 1,119  | ,682                | 1,837 |
| VASTY2(31) | ,693   | ,240 | 8,319   | 1  | ,004 | 1,999  | 1,249               | 3,200 |
| VASTY2(32) | ,130   | ,269 | ,235    | 1  | ,628 | 1,139  | ,672                | 1,931 |
| VASTY2(33) | ,161   | ,268 | ,360    | 1  | ,548 | 1,175  | ,694                | 1,987 |
| VASTY2(34) | -1,523 | ,400 | 14,471  | 1  | ,000 | ,218   | ,099                | ,478  |
| VASTY2(35) | ,477   | ,243 | 3,866   | 1  | ,049 | 1,611  | 1,001               | 2,593 |
| Constant   | -2,232 | ,190 | 138,002 | 1  | ,000 | ,107   |                     |       |

a. Variable(s) entered on step 1: sv5, VASTY2.

```
LOGISTIC REGRESSION VARIABLES hand01
/METHOD=ENTER sv7 VASTY2
/CONTRAST (sv7)=Indicator(1)
/CONTRAST (VASTY2)=Indicator(1)
/PRINT=CI(95)
/CRITERIA=PIN(0.05) POUT(0.10) ITERATE(20) CUT(0.5).
```

**Block 1: Method = Enter**

Omnibus Tests of Model Coefficients

|        |       | Chi-square | df | Sig. |
|--------|-------|------------|----|------|
| Step 1 | Step  | 564,160    | 41 | ,000 |
|        | Block | 564,160    | 41 | ,000 |
|        | Model | 564,160    | 41 | ,000 |

**Model Summary**

| Step | -2 Log likelihood    | Cox & Snell R Square | Nagelkerke R Square |
|------|----------------------|----------------------|---------------------|
| 1    | 8059,42 <sup>a</sup> | ,044                 | ,089                |

a. Estimation terminated at iteration number 6 because parameter estimates changed by less than ,001.

**Classification Table<sup>a</sup>**

| Observed           |                              | Predicted                    |                     |                    |       |
|--------------------|------------------------------|------------------------------|---------------------|--------------------|-------|
|                    |                              | hand01 händelse nej eller ja |                     | Percentage Correct |       |
|                    |                              | 0 ingen händelse             | 1 minst en händelse |                    |       |
| Step 1             | hand01 händelse nej eller ja | 0 ingen händelse             | 11108               | 0                  | 100,0 |
|                    |                              | 1 minst en händelse          | 1367                | 0                  | ,0    |
| Overall Percentage |                              |                              |                     |                    | 89,0  |

a. The cut value is ,500

**Variables in the Equation**

|                     | B      | S.E. | Wald    | df | Sig. | Exp(B) | 95% C.I. for EXP(B) |       |
|---------------------|--------|------|---------|----|------|--------|---------------------|-------|
|                     |        |      |         |    |      |        | Lower               | Upper |
| Step 1 <sup>a</sup> |        |      | 25,503  | 6  | ,000 |        |                     |       |
| sv7                 |        |      |         |    |      |        |                     |       |
| sv7(1)              | -,325  | ,124 | 6,831   | 1  | ,009 | ,723   | ,566                | ,922  |
| sv7(2)              | -,076  | ,126 | ,361    | 1  | ,548 | ,927   | ,723                | 1,188 |
| sv7(3)              | -,121  | ,125 | ,927    | 1  | ,336 | ,886   | ,694                | 1,133 |
| sv7(4)              | -,056  | ,119 | ,224    | 1  | ,636 | ,945   | ,749                | 1,193 |
| sv7(5)              | ,047   | ,112 | ,176    | 1  | ,674 | 1,048  | ,841                | 1,306 |
| sv7(6)              | ,344   | ,125 | 7,528   | 1  | ,006 | 1,410  | 1,103               | 1,803 |
| VASTY2              |        |      | 432,430 | 35 | ,000 |        |                     |       |
| VASTY2(1)           | ,293   | ,241 | 1,484   | 1  | ,223 | 1,341  | ,836                | 2,150 |
| VASTY2(2)           | 1,034  | ,222 | 21,724  | 1  | ,000 | 2,812  | 1,820               | 4,343 |
| VASTY2(3)           | -,668  | ,302 | 4,901   | 1  | ,027 | ,513   | ,284                | ,926  |
| VASTY2(4)           | ,304   | ,242 | 1,574   | 1  | ,210 | 1,355  | ,843                | 2,177 |
| VASTY2(5)           | -,237  | ,283 | ,699    | 1  | ,403 | ,789   | ,453                | 1,374 |
| VASTY2(6)           | -1,270 | ,336 | 14,239  | 1  | ,000 | ,281   | ,145                | ,543  |
| VASTY2(7)           | 1,259  | ,217 | 33,714  | 1  | ,000 | 3,520  | 2,302               | 5,383 |
| VASTY2(8)           | ,377   | ,241 | 2,454   | 1  | ,117 | 1,458  | ,910                | 2,337 |
| VASTY2(9)           | ,283   | ,246 | 1,330   | 1  | ,249 | 1,327  | ,820                | 2,148 |
| VASTY2(10)          | ,847   | ,226 | 13,989  | 1  | ,000 | 2,333  | 1,497               | 3,636 |
| VASTY2(11)          | ,916   | ,223 | 16,906  | 1  | ,000 | 2,499  | 1,615               | 3,868 |

## Variables in the Equation

|            | B      | S.E. | Wald    | df | Sig. | Exp(B) | 95% C.I. for EXP(B) |       |
|------------|--------|------|---------|----|------|--------|---------------------|-------|
|            |        |      |         |    |      |        | Lower               | Upper |
| VASTY2(12) | ,001   | ,251 | ,000    | 1  | ,997 | 1,001  | ,613                | 1,636 |
| VASTY2(13) | ,657   | ,231 | 8,102   | 1  | ,004 | 1,929  | 1,227               | 3,032 |
| VASTY2(14) | -,347  | ,269 | 1,662   | 1  | ,197 | ,707   | ,417                | 1,198 |
| VASTY2(15) | ,094   | ,247 | ,146    | 1  | ,702 | 1,099  | ,677                | 1,783 |
| VASTY2(16) | ,287   | ,290 | ,979    | 1  | ,322 | 1,332  | ,755                | 2,352 |
| VASTY2(17) | -1,169 | ,356 | 10,782  | 1  | ,001 | ,311   | ,155                | ,624  |
| VASTY2(18) | -,619  | ,331 | 3,504   | 1  | ,061 | ,539   | ,282                | 1,030 |
| VASTY2(19) | -1,140 | ,393 | 8,403   | 1  | ,004 | ,320   | ,148                | ,691  |
| VASTY2(20) | -,004  | ,264 | ,000    | 1  | ,986 | ,996   | ,594                | 1,669 |
| VASTY2(21) | -,102  | ,263 | ,151    | 1  | ,698 | ,903   | ,540                | 1,511 |
| VASTY2(22) | ,057   | ,252 | ,052    | 1  | ,820 | 1,059  | ,647                | 1,734 |
| VASTY2(23) | ,734   | ,228 | 10,398  | 1  | ,001 | 2,084  | 1,334               | 3,256 |
| VASTY2(24) | ,584   | ,230 | 6,482   | 1  | ,011 | 1,794  | 1,144               | 2,813 |
| VASTY2(25) | ,164   | ,265 | ,381    | 1  | ,537 | 1,178  | ,701                | 1,980 |
| VASTY2(26) | -,809  | ,337 | 5,781   | 1  | ,016 | ,445   | ,230                | ,861  |
| VASTY2(27) | -1,377 | ,359 | 14,731  | 1  | ,000 | ,252   | ,125                | ,510  |
| VASTY2(28) | -1,174 | ,382 | 9,468   | 1  | ,002 | ,309   | ,146                | ,653  |
| VASTY2(29) | -1,274 | ,333 | 14,612  | 1  | ,000 | ,280   | ,146                | ,538  |
| VASTY2(30) | ,113   | ,253 | ,200    | 1  | ,655 | 1,119  | ,682                | 1,837 |
| VASTY2(31) | ,729   | ,241 | 9,166   | 1  | ,002 | 2,073  | 1,293               | 3,323 |
| VASTY2(32) | ,195   | ,272 | ,514    | 1  | ,473 | 1,215  | ,713                | 2,072 |
| VASTY2(33) | ,235   | ,272 | ,743    | 1  | ,389 | 1,265  | ,742                | 2,157 |
| VASTY2(34) | -1,526 | ,400 | 14,519  | 1  | ,000 | ,217   | ,099                | ,477  |
| VASTY2(35) | ,471   | ,243 | 3,759   | 1  | ,053 | 1,602  | ,995                | 2,578 |
| Constant   | -2,212 | ,194 | 129,865 | 1  | ,000 | ,109   |                     |       |

a. Variable(s) entered on step 1: sv7, VASTY2.

\*\*

```
LOGISTIC REGRESSION VARIABLES luonne1t1
  /METHOD=ENTER bv1 VASTY2
  /CONTRAST (bv1)=Indicator(1)
  /CONTRAST (VASTY2)=Indicator(1)
  /PRINT=CI(95)
  /CRITERIA=PIN(0.05) POUT(0.10) ITERATE(20) CUT(0.5).
```

**Block 1: Method = Enter**

## Omnibus Tests of Model Coefficients

|        |       | Chi-square | df | Sig. |
|--------|-------|------------|----|------|
| Step 1 | Step  | 320,286    | 37 | ,000 |
|        | Block | 320,286    | 37 | ,000 |
|        | Model | 320,286    | 37 | ,000 |

## Model Summary

| Step | -2 Log likelihood    | Cox & Snell R Square | Nagelkerke R Square |
|------|----------------------|----------------------|---------------------|
| 1    | 5876,59 <sup>a</sup> | ,025                 | ,065                |

a. Estimation terminated at iteration number 7 because parameter estimates changed by less than ,001.

Classification Table<sup>a</sup>

|                    |                                                   |                                                              | Predicted                                    |
|--------------------|---------------------------------------------------|--------------------------------------------------------------|----------------------------------------------|
|                    |                                                   |                                                              | luonnelt1<br>luonne<br>highest = ..          |
| Observed           |                                                   |                                                              | 0 ingen<br>händelse<br>eller läheltä<br>piti |
| Step 1             | luonnelt1 luonne highest = tapahtui<br>potilaalle | 0 ingen händelse eller läheltä piti<br>1 tapahtui potilaalle | 11627<br>848                                 |
| Overall Percentage |                                                   |                                                              |                                              |

Classification Table<sup>a</sup>

|                    |                                                   |                                                              | Predicted                            |
|--------------------|---------------------------------------------------|--------------------------------------------------------------|--------------------------------------|
|                    |                                                   |                                                              | luonnelt1<br>luonne<br>highest = ... |
| Observed           |                                                   |                                                              | 1 tapahtui<br>potilaalle             |
| Step 1             | luonnelt1 luonne highest = tapahtui<br>potilaalle | 0 ingen händelse eller läheltä piti<br>1 tapahtui potilaalle | 0<br>0                               |
| Overall Percentage |                                                   |                                                              |                                      |

Classification Table<sup>a</sup>

|                    |                                                |                                                              | Predicted          |
|--------------------|------------------------------------------------|--------------------------------------------------------------|--------------------|
|                    |                                                |                                                              |                    |
| Observed           |                                                |                                                              | Percentage Correct |
| Step 1             | luonnelt1 luonne highest = tapahtui potilaalle | 0 ingen händelse eller läheltä piti<br>1 tapahtui potilaalle | 100,0<br>,0        |
| Overall Percentage |                                                |                                                              | 93,2               |

a. The cut value is ,500

Variables in the Equation

|                     |            | B      | S.E. | Wald    | df | Sig. | Exp(B) | 95% C.I. for EXP(B) |       |
|---------------------|------------|--------|------|---------|----|------|--------|---------------------|-------|
|                     |            |        |      |         |    |      |        | Lower               | Upper |
| Step 1 <sup>a</sup> | bv1        |        |      | 12,580  | 2  | ,002 |        |                     |       |
|                     | bv1(1)     | -,279  | ,102 | 7,512   | 1  | ,006 | ,757   | ,620                | ,924  |
|                     | bv1(2)     | ,105   | ,085 | 1,521   | 1  | ,217 | 1,111  | ,940                | 1,312 |
|                     | VASTY2     |        |      | 236,395 | 35 | ,000 |        |                     |       |
|                     | VASTY2(1)  | ,094   | ,299 | ,099    | 1  | ,752 | 1,099  | ,611                | 1,975 |
|                     | VASTY2(2)  | ,538   | ,274 | 3,849   | 1  | ,050 | 1,713  | 1,000               | 2,934 |
|                     | VASTY2(3)  | -1,507 | ,466 | 10,436  | 1  | ,001 | ,222   | ,089                | ,553  |
|                     | VASTY2(4)  | ,124   | ,294 | ,178    | 1  | ,673 | 1,132  | ,637                | 2,013 |
|                     | VASTY2(5)  | -,192  | ,325 | ,350    | 1  | ,554 | ,825   | ,436                | 1,560 |
|                     | VASTY2(6)  | -1,298 | ,439 | 8,730   | 1  | ,003 | ,273   | ,115                | ,646  |
|                     | VASTY2(7)  | ,529   | ,276 | 3,672   | 1  | ,055 | 1,698  | ,988                | 2,917 |
|                     | VASTY2(8)  | -,265  | ,320 | ,686    | 1  | ,407 | ,767   | ,410                | 1,436 |
|                     | VASTY2(9)  | ,262   | ,291 | ,810    | 1  | ,368 | 1,299  | ,735                | 2,299 |
|                     | VASTY2(10) | 1,014  | ,258 | 15,416  | 1  | ,000 | 2,756  | 1,662               | 4,572 |
|                     | VASTY2(11) | ,615   | ,272 | 5,094   | 1  | ,024 | 1,849  | 1,084               | 3,153 |
|                     | VASTY2(12) | ,115   | ,295 | ,153    | 1  | ,695 | 1,122  | ,630                | 1,999 |
|                     | VASTY2(13) | ,966   | ,260 | 13,812  | 1  | ,000 | 2,628  | 1,579               | 4,374 |
|                     | VASTY2(14) | -,257  | ,320 | ,646    | 1  | ,422 | ,773   | ,413                | 1,448 |
|                     | VASTY2(15) | ,244   | ,288 | ,719    | 1  | ,396 | 1,277  | ,726                | 2,246 |
|                     | VASTY2(16) | ,515   | ,330 | 2,437   | 1  | ,119 | 1,674  | ,877                | 3,196 |
|                     | VASTY2(17) | -1,073 | ,418 | 6,592   | 1  | ,010 | ,342   | ,151                | ,776  |
|                     | VASTY2(18) | -,668  | ,365 | 3,357   | 1  | ,067 | ,513   | ,251                | 1,048 |
|                     | VASTY2(19) | -1,610 | ,551 | 8,547   | 1  | ,003 | ,200   | ,068                | ,588  |
|                     | VASTY2(20) | ,066   | ,314 | ,045    | 1  | ,832 | 1,069  | ,578                | 1,977 |
|                     | VASTY2(21) | -,127  | ,312 | ,167    | 1  | ,683 | ,880   | ,478                | 1,622 |
|                     | VASTY2(22) | ,328   | ,291 | 1,275   | 1  | ,259 | 1,388  | ,786                | 2,454 |
|                     | VASTY2(23) | ,308   | ,288 | 1,142   | 1  | ,285 | 1,360  | ,774                | 2,392 |

## Variables in the Equation

|            | B      | S.E. | Wald    | df | Sig. | Exp(B) | 95% C.I. for EXP(B) |       |
|------------|--------|------|---------|----|------|--------|---------------------|-------|
|            |        |      |         |    |      |        | Lower               | Upper |
| VASTY2(24) | ,264   | ,286 | ,857    | 1  | ,355 | 1,303  | ,744                | 2,281 |
| VASTY2(25) | ,346   | ,300 | 1,323   | 1  | ,250 | 1,413  | ,784                | 2,546 |
| VASTY2(26) | -,909  | ,419 | 4,711   | 1  | ,030 | ,403   | ,177                | ,916  |
| VASTY2(27) | -1,454 | ,466 | 9,752   | 1  | ,002 | ,234   | ,094                | ,582  |
| VASTY2(28) | -,988  | ,467 | 4,473   | 1  | ,034 | ,372   | ,149                | ,930  |
| VASTY2(29) | -1,026 | ,401 | 6,552   | 1  | ,010 | ,359   | ,163                | ,786  |
| VASTY2(30) | -,190  | ,315 | ,364    | 1  | ,546 | ,827   | ,445                | 1,534 |
| VASTY2(31) | ,520   | ,278 | 3,496   | 1  | ,062 | 1,681  | ,975                | 2,899 |
| VASTY2(32) | -,035  | ,313 | ,012    | 1  | ,912 | ,966   | ,523                | 1,783 |
| VASTY2(33) | ,035   | ,305 | ,013    | 1  | ,909 | 1,035  | ,569                | 1,884 |
| VASTY2(34) | -1,255 | ,438 | 8,197   | 1  | ,004 | ,285   | ,121                | ,673  |
| VASTY2(35) | ,668   | ,278 | 5,783   | 1  | ,016 | 1,951  | 1,132               | 3,363 |
| Constant   | -2,639 | ,218 | 146,911 | 1  | ,000 | ,071   |                     |       |

a. Variable(s) entered on step 1: bv1, VASTY2.

```
LOGISTIC REGRESSION VARIABLES luonnel1
/METHOD=ENTER bv2 VASTY2
/CONTRAST (bv2)=Indicator(1)
/CONTRAST (VASTY2)=Indicator(1)
/PRINT=CI(95)
/CRITERIA=PIN(0.05) POUT(0.10) ITERATE(20) CUT(0.5).
```

**Block 1: Method = Enter****Omnibus Tests of Model Coefficients**

|        |       | Chi-square | df | Sig. |
|--------|-------|------------|----|------|
| Step 1 | Step  | 316,220    | 37 | ,000 |
|        | Block | 316,220    | 37 | ,000 |
|        | Model | 316,220    | 37 | ,000 |



**Model Summary**

| Step | -2 Log likelihood    | Cox & Snell R Square | Nagelkerke R Square |
|------|----------------------|----------------------|---------------------|
| 1    | 5880,65 <sup>a</sup> | ,025                 | ,064                |

a. Estimation terminated at iteration number 7 because parameter estimates changed by less than ,001.

**Classification Table<sup>a</sup>**

|                    |                                                | Predicted                                                    |              |
|--------------------|------------------------------------------------|--------------------------------------------------------------|--------------|
|                    |                                                | luonnelt1 luonne highest = ...                               |              |
| Observed           |                                                | 0 ingen händelse eller läheltä piti                          |              |
| Step 1             | luonnelt1 luonne highest = tapahtui potilaalle | 0 ingen händelse eller läheltä piti<br>1 tapahtui potilaalle | 11627<br>848 |
| Overall Percentage |                                                |                                                              |              |

**Classification Table<sup>a</sup>**

|                    |                                                | Predicted                                                    |        |
|--------------------|------------------------------------------------|--------------------------------------------------------------|--------|
|                    |                                                | luonnelt1 luonne highest = ...                               |        |
| Observed           |                                                | 1 tapahtui potilaalle                                        |        |
| Step 1             | luonnelt1 luonne highest = tapahtui potilaalle | 0 ingen händelse eller läheltä piti<br>1 tapahtui potilaalle | 0<br>0 |
| Overall Percentage |                                                |                                                              |        |

Classification Table<sup>a</sup>

|                    |                                                |                                                              | Predicted          |
|--------------------|------------------------------------------------|--------------------------------------------------------------|--------------------|
|                    |                                                |                                                              |                    |
| Observed           |                                                |                                                              | Percentage Correct |
| Step 1             | luonnelt1 luonne highest = tapahtui potilaalle | 0 ingen händelse eller läheltä piti<br>1 tapahtui potilaalle | 100,0<br>,0        |
| Overall Percentage |                                                |                                                              | 93,2               |

a. The cut value is ,500

Variables in the Equation

|                     |            | B      | S.E. | Wald    | df | Sig. | Exp(B) | 95% C.I. for EXP(B) |       |
|---------------------|------------|--------|------|---------|----|------|--------|---------------------|-------|
|                     |            |        |      |         |    |      |        | Lower               | Upper |
| Step 1 <sup>a</sup> | bv2        |        |      | 8,836   | 2  | ,012 |        |                     |       |
|                     | bv2(1)     | -,178  | ,103 | 3,024   | 1  | ,082 | ,837   | ,684                | 1,023 |
|                     | bv2(2)     | ,092   | ,094 | ,963    | 1  | ,326 | 1,097  | ,912                | 1,318 |
|                     | VASTY2     |        |      | 238,156 | 35 | ,000 |        |                     |       |
|                     | VASTY2(1)  | ,083   | ,299 | ,077    | 1  | ,781 | 1,087  | ,605                | 1,953 |
|                     | VASTY2(2)  | ,540   | ,274 | 3,877   | 1  | ,049 | 1,717  | 1,002               | 2,940 |
|                     | VASTY2(3)  | -1,490 | ,466 | 10,218  | 1  | ,001 | ,225   | ,090                | ,562  |
|                     | VASTY2(4)  | ,133   | ,293 | ,205    | 1  | ,651 | 1,142  | ,643                | 2,029 |
|                     | VASTY2(5)  | -,194  | ,325 | ,356    | 1  | ,551 | ,824   | ,436                | 1,557 |
|                     | VASTY2(6)  | -1,289 | ,439 | 8,622   | 1  | ,003 | ,276   | ,117                | ,651  |
|                     | VASTY2(7)  | ,539   | ,275 | 3,839   | 1  | ,050 | 1,714  | 1,000               | 2,940 |
|                     | VASTY2(8)  | -,263  | ,320 | ,677    | 1  | ,411 | ,768   | ,410                | 1,439 |
|                     | VASTY2(9)  | ,261   | ,291 | ,805    | 1  | ,370 | 1,298  | ,734                | 2,297 |
|                     | VASTY2(10) | 1,022  | ,258 | 15,652  | 1  | ,000 | 2,778  | 1,675               | 4,608 |
|                     | VASTY2(11) | ,614   | ,272 | 5,092   | 1  | ,024 | 1,848  | 1,084               | 3,149 |
|                     | VASTY2(12) | ,120   | ,295 | ,166    | 1  | ,684 | 1,128  | ,633                | 2,008 |
|                     | VASTY2(13) | ,971   | ,260 | 13,951  | 1  | ,000 | 2,642  | 1,587               | 4,398 |
|                     | VASTY2(14) | -,258  | ,320 | ,650    | 1  | ,420 | ,773   | ,413                | 1,447 |
|                     | VASTY2(15) | ,240   | ,288 | ,696    | 1  | ,404 | 1,272  | ,723                | 2,237 |
|                     | VASTY2(16) | ,509   | ,330 | 2,390   | 1  | ,122 | 1,664  | ,872                | 3,175 |
|                     | VASTY2(17) | -1,076 | ,418 | 6,639   | 1  | ,010 | ,341   | ,150                | ,773  |
|                     | VASTY2(18) | -,677  | ,364 | 3,445   | 1  | ,063 | ,508   | ,249                | 1,039 |
|                     | VASTY2(19) | -1,680 | ,549 | 9,351   | 1  | ,002 | ,186   | ,064                | ,547  |
|                     | VASTY2(20) | ,071   | ,314 | ,052    | 1  | ,820 | 1,074  | ,581                | 1,985 |
|                     | VASTY2(21) | -,126  | ,312 | ,164    | 1  | ,685 | ,881   | ,478                | 1,624 |
|                     | VASTY2(22) | ,322   | ,291 | 1,227   | 1  | ,268 | 1,380  | ,780                | 2,440 |
|                     | VASTY2(23) | ,298   | ,288 | 1,069   | 1  | ,301 | 1,347  | ,766                | 2,367 |

Variables in the Equation

|            | B      | S.E. | Wald    | df | Sig. | Exp(B) | 95% C.I. for EXP(B) |       |
|------------|--------|------|---------|----|------|--------|---------------------|-------|
|            |        |      |         |    |      |        | Lower               | Upper |
| VASTY2(24) | ,280   | ,286 | ,958    | 1  | ,328 | 1,322  | ,756                | 2,315 |
| VASTY2(25) | ,347   | ,300 | 1,337   | 1  | ,248 | 1,415  | ,785                | 2,550 |
| VASTY2(26) | -,913  | ,419 | 4,751   | 1  | ,029 | ,401   | ,177                | ,912  |
| VASTY2(27) | -1,455 | ,465 | 9,774   | 1  | ,002 | ,233   | ,094                | ,581  |
| VASTY2(28) | -,986  | ,467 | 4,448   | 1  | ,035 | ,373   | ,149                | ,933  |
| VASTY2(29) | -1,016 | ,401 | 6,424   | 1  | ,011 | ,362   | ,165                | ,794  |
| VASTY2(30) | -,182  | ,315 | ,333    | 1  | ,564 | ,834   | ,449                | 1,547 |
| VASTY2(31) | ,508   | ,277 | 3,352   | 1  | ,067 | 1,662  | ,965                | 2,862 |
| VASTY2(32) | -,056  | ,312 | ,033    | 1  | ,857 | ,945   | ,513                | 1,742 |
| VASTY2(33) | ,020   | ,305 | ,004    | 1  | ,948 | 1,020  | ,561                | 1,855 |
| VASTY2(34) | -1,251 | ,438 | 8,136   | 1  | ,004 | ,286   | ,121                | ,676  |
| VASTY2(35) | ,677   | ,277 | 5,975   | 1  | ,015 | 1,968  | 1,144               | 3,387 |
| Constant   | -2,650 | ,223 | 140,917 | 1  | ,000 | ,071   |                     |       |

a. Variable(s) entered on step 1: bv2, VASTY2.

```
LOGISTIC REGRESSION VARIABLES luonnel1
/METHOD=ENTER bv3 VASTY2
/CONTRAST (bv3)=Indicator(1)
/CONTRAST (VASTY2)=Indicator(1)
/PRINT=CI(95)
/CRITERIA=PIN(0.05) POUT(0.10) ITERATE(20) CUT(0.5).
```

**Block 1: Method = Enter**

Omnibus Tests of Model Coefficients

|        |       | Chi-square | df | Sig. |
|--------|-------|------------|----|------|
| Step 1 | Step  | 316,969    | 37 | ,000 |
|        | Block | 316,969    | 37 | ,000 |
|        | Model | 316,969    | 37 | ,000 |

**Model Summary**

| Step | -2 Log likelihood    | Cox & Snell R Square | Nagelkerke R Square |
|------|----------------------|----------------------|---------------------|
| 1    | 5879,90 <sup>a</sup> | ,025                 | ,064                |

a. Estimation terminated at iteration number 7 because parameter estimates changed by less than ,001.

**Classification Table<sup>a</sup>**

|                    |                                                   |                                                              | Predicted<br>luonnelt1<br>luonne<br>highest = ... |
|--------------------|---------------------------------------------------|--------------------------------------------------------------|---------------------------------------------------|
| Observed           |                                                   |                                                              | 0 ingen<br>händelse<br>eller läheltä<br>piti      |
| Step 1             | luonnelt1 luonne highest = tapahtui<br>potilaalle | 0 ingen händelse eller läheltä piti<br>1 tapahtui potilaalle | 11627<br>848                                      |
| Overall Percentage |                                                   |                                                              |                                                   |

**Classification Table<sup>a</sup>**

|                    |                                                   |                                                              | Predicted<br>luonnelt1<br>luonne<br>highest = ... |
|--------------------|---------------------------------------------------|--------------------------------------------------------------|---------------------------------------------------|
| Observed           |                                                   |                                                              | 1 tapahtui<br>potilaalle                          |
| Step 1             | luonnelt1 luonne highest = tapahtui<br>potilaalle | 0 ingen händelse eller läheltä piti<br>1 tapahtui potilaalle | 0<br>0                                            |
| Overall Percentage |                                                   |                                                              |                                                   |

Classification Table<sup>a</sup>

|                    |                                                |                                                              | Predicted          |
|--------------------|------------------------------------------------|--------------------------------------------------------------|--------------------|
|                    |                                                |                                                              |                    |
| Observed           |                                                |                                                              | Percentage Correct |
| Step 1             | luonnelt1 luonne highest = tapahtui potilaalle | 0 ingen händelse eller läheltä piti<br>1 tapahtui potilaalle | 100,0<br>,0        |
| Overall Percentage |                                                |                                                              | 93,2               |

a. The cut value is ,500

Variables in the Equation

|                     |            | B      | S.E. | Wald    | df | Sig. | Exp(B) | 95% C.I. for EXP(B) |       |
|---------------------|------------|--------|------|---------|----|------|--------|---------------------|-------|
|                     |            |        |      |         |    |      |        | Lower               | Upper |
| Step 1 <sup>a</sup> | bv3        |        |      | 9,244   | 2  | ,010 |        |                     |       |
|                     | bv3(1)     | -,346  | ,140 | 6,122   | 1  | ,013 | ,708   | ,538                | ,931  |
|                     | bv3(2)     | ,147   | ,103 | 2,035   | 1  | ,154 | 1,158  | ,947                | 1,417 |
|                     | VASTY2     |        |      | 240,353 | 35 | ,000 |        |                     |       |
|                     | VASTY2(1)  | ,122   | ,299 | ,165    | 1  | ,684 | 1,129  | ,628                | 2,030 |
|                     | VASTY2(2)  | ,564   | ,274 | 4,233   | 1  | ,040 | 1,758  | 1,027               | 3,008 |
|                     | VASTY2(3)  | -1,468 | ,466 | 9,921   | 1  | ,002 | ,230   | ,092                | ,574  |
|                     | VASTY2(4)  | ,150   | ,293 | ,262    | 1  | ,609 | 1,162  | ,654                | 2,066 |
|                     | VASTY2(5)  | -,170  | ,325 | ,275    | 1  | ,600 | ,844   | ,446                | 1,594 |
|                     | VASTY2(6)  | -1,276 | ,439 | 8,434   | 1  | ,004 | ,279   | ,118                | ,660  |
|                     | VASTY2(7)  | ,545   | ,278 | 3,842   | 1  | ,050 | 1,725  | 1,000               | 2,975 |
|                     | VASTY2(8)  | -,230  | ,320 | ,518    | 1  | ,472 | ,795   | ,425                | 1,486 |
|                     | VASTY2(9)  | ,294   | ,291 | 1,026   | 1  | ,311 | 1,342  | ,759                | 2,372 |
|                     | VASTY2(10) | 1,047  | ,258 | 16,512  | 1  | ,000 | 2,850  | 1,720               | 4,724 |
|                     | VASTY2(11) | ,632   | ,272 | 5,388   | 1  | ,020 | 1,881  | 1,103               | 3,206 |
|                     | VASTY2(12) | ,150   | ,294 | ,260    | 1  | ,610 | 1,162  | ,653                | 2,067 |
|                     | VASTY2(13) | 1,023  | ,258 | 15,658  | 1  | ,000 | 2,781  | 1,676               | 4,615 |
|                     | VASTY2(14) | -,228  | ,320 | ,509    | 1  | ,475 | ,796   | ,425                | 1,490 |
|                     | VASTY2(15) | ,270   | ,288 | ,882    | 1  | ,348 | 1,310  | ,745                | 2,303 |
|                     | VASTY2(16) | ,514   | ,331 | 2,418   | 1  | ,120 | 1,673  | ,875                | 3,200 |
|                     | VASTY2(17) | -1,086 | ,418 | 6,766   | 1  | ,009 | ,337   | ,149                | ,765  |
|                     | VASTY2(18) | -,669  | ,365 | 3,366   | 1  | ,067 | ,512   | ,251                | 1,047 |
|                     | VASTY2(19) | -1,599 | ,552 | 8,382   | 1  | ,004 | ,202   | ,068                | ,596  |
|                     | VASTY2(20) | ,087   | ,314 | ,077    | 1  | ,781 | 1,091  | ,590                | 2,020 |
|                     | VASTY2(21) | -,111  | ,312 | ,127    | 1  | ,721 | ,895   | ,486                | 1,648 |
|                     | VASTY2(22) | ,287   | ,290 | ,981    | 1  | ,322 | 1,333  | ,755                | 2,353 |
|                     | VASTY2(23) | ,308   | ,288 | 1,145   | 1  | ,285 | 1,361  | ,774                | 2,392 |

## Variables in the Equation

|            | B      | S.E. | Wald    | df | Sig. | Exp(B) | 95% C.I. for EXP(B) |       |
|------------|--------|------|---------|----|------|--------|---------------------|-------|
|            |        |      |         |    |      |        | Lower               | Upper |
| VASTY2(24) | ,293   | ,286 | 1,052   | 1  | ,305 | 1,340  | ,766                | 2,346 |
| VASTY2(25) | ,362   | ,301 | 1,450   | 1  | ,229 | 1,436  | ,797                | 2,589 |
| VASTY2(26) | -,881  | ,419 | 4,428   | 1  | ,035 | ,414   | ,182                | ,941  |
| VASTY2(27) | -1,419 | ,465 | 9,305   | 1  | ,002 | ,242   | ,097                | ,602  |
| VASTY2(28) | -,936  | ,467 | 4,025   | 1  | ,045 | ,392   | ,157                | ,979  |
| VASTY2(29) | -1,011 | ,401 | 6,376   | 1  | ,012 | ,364   | ,166                | ,797  |
| VASTY2(30) | -,184  | ,315 | ,341    | 1  | ,559 | ,832   | ,448                | 1,543 |
| VASTY2(31) | ,543   | ,279 | 3,785   | 1  | ,052 | 1,721  | ,996                | 2,973 |
| VASTY2(32) | -,014  | ,314 | ,002    | 1  | ,965 | ,986   | ,533                | 1,825 |
| VASTY2(33) | ,062   | ,306 | ,041    | 1  | ,839 | 1,064  | ,584                | 1,939 |
| VASTY2(34) | -1,244 | ,438 | 8,054   | 1  | ,005 | ,288   | ,122                | ,681  |
| VASTY2(35) | ,687   | ,278 | 6,082   | 1  | ,014 | 1,987  | 1,151               | 3,430 |
| Constant   | -2,676 | ,216 | 154,004 | 1  | ,000 | ,069   |                     |       |

a. Variable(s) entered on step 1: bv3, VASTY2.

## Block 1: Method = Enter

## Omnibus Tests of Model Coefficients

|        |       | Chi-square | df | Sig. |
|--------|-------|------------|----|------|
| Step 1 | Step  | 311,201    | 37 | ,000 |
|        | Block | 311,201    | 37 | ,000 |
|        | Model | 311,201    | 37 | ,000 |

## Model Summary

| Step | -2 Log likelihood    | Cox & Snell R Square | Nagelkerke R Square |
|------|----------------------|----------------------|---------------------|
| 1    | 5885,67 <sup>a</sup> | ,025                 | ,063                |

a. Estimation terminated at iteration number 7 because parameter estimates changed by less than ,001.

1  
2  
3  
4  
5  
6  
7  
8  
9  
10  
11  
12  
13  
14  
15  
16  
17  
18  
19  
20  
21  
22  
23  
24  
25  
26  
27  
28  
29  
30  
31  
32  
33  
34  
35  
36  
37  
38  
39  
40  
41  
42  
43  
44  
45  
46  
47  
48  
49  
50  
51  
52  
53  
54  
55  
56  
57  
58  
59  
60

**Classification Table<sup>a</sup>**

| Observed           |                                                |                                                              | Predicted                            |
|--------------------|------------------------------------------------|--------------------------------------------------------------|--------------------------------------|
|                    |                                                |                                                              | luonnelt1<br>luonne<br>highest = ... |
| Step 1             | luonnelt1 luonne highest = tapahtui potilaalle | 0 ingen händelse eller läheltä piti<br>1 tapahtui potilaalle | 11627<br>848                         |
| Overall Percentage |                                                |                                                              |                                      |

**Classification Table<sup>a</sup>**

| Observed           |                                                |                                                              | Predicted                            |
|--------------------|------------------------------------------------|--------------------------------------------------------------|--------------------------------------|
|                    |                                                |                                                              | luonnelt1<br>luonne<br>highest = ... |
| Step 1             | luonnelt1 luonne highest = tapahtui potilaalle | 0 ingen händelse eller läheltä piti<br>1 tapahtui potilaalle | 0<br>0                               |
| Overall Percentage |                                                |                                                              |                                      |

**Classification Table<sup>a</sup>**

| Observed           |                                                |                                                              | Predicted             |
|--------------------|------------------------------------------------|--------------------------------------------------------------|-----------------------|
|                    |                                                |                                                              | Percentage<br>Correct |
| Step 1             | luonnelt1 luonne highest = tapahtui potilaalle | 0 ingen händelse eller läheltä piti<br>1 tapahtui potilaalle | 100,0<br>,0           |
| Overall Percentage |                                                |                                                              | 93,2                  |

a. The cut value is ,500

## Variables in the Equation

|                     | B      | S.E. | Wald    | df | Sig. | Exp(B) | 95% C.I. for EXP(B) |       |
|---------------------|--------|------|---------|----|------|--------|---------------------|-------|
|                     |        |      |         |    |      |        | Lower               | Upper |
| Step 1 <sup>a</sup> |        |      |         |    |      |        |                     |       |
| sv3                 |        |      | 3,981   | 2  | ,137 |        |                     |       |
| sv3(1)              | -,060  | ,106 | ,325    | 1  | ,569 | ,941   | ,765                | 1,158 |
| sv3(2)              | ,154   | ,103 | 2,238   | 1  | ,135 | 1,166  | ,953                | 1,427 |
| VASTY2              |        |      | 231,303 | 35 | ,000 |        |                     |       |
| VASTY2(1)           | ,058   | ,300 | ,038    | 1  | ,846 | 1,060  | ,589                | 1,908 |
| VASTY2(2)           | ,488   | ,278 | 3,079   | 1  | ,079 | 1,628  | ,945                | 2,807 |
| VASTY2(3)           | -1,367 | ,465 | 8,655   | 1  | ,003 | ,255   | ,102                | ,634  |
| VASTY2(4)           | ,225   | ,292 | ,596    | 1  | ,440 | 1,253  | ,707                | 2,221 |
| VASTY2(5)           | -,101  | ,326 | ,095    | 1  | ,758 | ,904   | ,477                | 1,714 |
| VASTY2(6)           | -1,344 | ,442 | 9,235   | 1  | ,002 | ,261   | ,110                | ,621  |
| VASTY2(7)           | ,662   | ,272 | 5,921   | 1  | ,015 | 1,939  | 1,138               | 3,306 |
| VASTY2(8)           | -,160  | ,320 | ,250    | 1  | ,617 | ,852   | ,455                | 1,596 |
| VASTY2(9)           | ,321   | ,290 | 1,228   | 1  | ,268 | 1,379  | ,781                | 2,435 |
| VASTY2(10)          | ,968   | ,263 | 13,515  | 1  | ,000 | 2,632  | 1,571               | 4,410 |
| VASTY2(11)          | ,634   | ,272 | 5,443   | 1  | ,020 | 1,886  | 1,107               | 3,214 |
| VASTY2(12)          | ,087   | ,297 | ,086    | 1  | ,769 | 1,091  | ,609                | 1,954 |
| VASTY2(13)          | ,962   | ,264 | 13,267  | 1  | ,000 | 2,616  | 1,559               | 4,388 |
| VASTY2(14)          | -,266  | ,321 | ,687    | 1  | ,407 | ,766   | ,408                | 1,438 |
| VASTY2(15)          | ,196   | ,292 | ,452    | 1  | ,501 | 1,217  | ,687                | 2,154 |
| VASTY2(16)          | ,501   | ,330 | 2,305   | 1  | ,129 | 1,650  | ,864                | 3,151 |
| VASTY2(17)          | -1,075 | ,418 | 6,615   | 1  | ,010 | ,341   | ,150                | ,774  |
| VASTY2(18)          | -,590  | ,371 | 2,526   | 1  | ,112 | ,555   | ,268                | 1,147 |
| VASTY2(19)          | -1,719 | ,552 | 9,710   | 1  | ,002 | ,179   | ,061                | ,529  |
| VASTY2(20)          | ,061   | ,314 | ,037    | 1  | ,847 | 1,063  | ,574                | 1,967 |
| VASTY2(21)          | -,067  | ,312 | ,046    | 1  | ,829 | ,935   | ,507                | 1,723 |
| VASTY2(22)          | ,247   | ,290 | ,729    | 1  | ,393 | 1,281  | ,726                | 2,259 |
| VASTY2(23)          | ,303   | ,288 | 1,104   | 1  | ,293 | 1,353  | ,770                | 2,379 |
| VASTY2(24)          | ,316   | ,285 | 1,230   | 1  | ,267 | 1,371  | ,785                | 2,396 |
| VASTY2(25)          | ,377   | ,301 | 1,567   | 1  | ,211 | 1,458  | ,808                | 2,632 |
| VASTY2(26)          | -,881  | ,418 | 4,429   | 1  | ,035 | ,415   | ,183                | ,941  |
| VASTY2(27)          | -1,469 | ,466 | 9,917   | 1  | ,002 | ,230   | ,092                | ,574  |
| VASTY2(28)          | -1,024 | ,471 | 4,721   | 1  | ,030 | ,359   | ,143                | ,905  |
| VASTY2(29)          | -1,110 | ,406 | 7,480   | 1  | ,006 | ,329   | ,149                | ,730  |
| VASTY2(30)          | -,112  | ,316 | ,126    | 1  | ,723 | ,894   | ,481                | 1,661 |
| VASTY2(31)          | ,591   | ,283 | 4,348   | 1  | ,037 | 1,806  | 1,036               | 3,147 |
| VASTY2(32)          | ,002   | ,319 | ,000    | 1  | ,994 | 1,002  | ,536                | 1,875 |
| VASTY2(33)          | ,090   | ,313 | ,083    | 1  | ,773 | 1,095  | ,593                | 2,021 |
| VASTY2(34)          | -1,232 | ,438 | 7,897   | 1  | ,005 | ,292   | ,124                | ,689  |
| VASTY2(35)          | ,722   | ,276 | 6,854   | 1  | ,009 | 2,059  | 1,199               | 3,536 |
| Constant            | -2,724 | ,221 | 152,364 | 1  | ,000 | ,066   |                     |       |

a. Variable(s) entered on step 1: sv3, VASTY2.



```

LOGISTIC REGRESSION VARIABLES luonnelt1
/METHOD=ENTER sv5 VASTY2
/CONTRAST (sv5)=Indicator(1)
/CONTRAST (VASTY2)=Indicator(1)
/PRINT=CI(95)
/CRITERIA=PIN(0.05) POUT(0.10) ITERATE(20) CUT(0.5).
    
```

**Block 1: Method = Enter**

**Omnibus Tests of Model Coefficients**

|        |       | Chi-square | df | Sig. |
|--------|-------|------------|----|------|
| Step 1 | Step  | 312,321    | 39 | ,000 |
|        | Block | 312,321    | 39 | ,000 |
|        | Model | 312,321    | 39 | ,000 |

**Model Summary**

| Step | -2 Log likelihood    | Cox & Snell R Square | Nagelkerke R Square |
|------|----------------------|----------------------|---------------------|
| 1    | 5884,55 <sup>a</sup> | ,025                 | ,063                |

a. Estimation terminated at iteration number 7 because parameter estimates changed by less than ,001.

**Classification Table<sup>a</sup>**

|                    |                                                | Predicted                          |                                              |
|--------------------|------------------------------------------------|------------------------------------|----------------------------------------------|
|                    |                                                | luonnelt1<br>luonne<br>highest = . | 0 ingen<br>händelse<br>eller läheltä<br>piti |
|                    | Observed                                       |                                    |                                              |
| Step 1             | luonnelt1 luonne highest = tapahtui potilaalle | 11627                              | 848                                          |
|                    | 0 ingen händelse eller läheltä piti            |                                    | 1 tapahtui potilaalle                        |
| Overall Percentage |                                                |                                    |                                              |

Classification Table<sup>a</sup>

| Observed           |                                                   |                                                              | Predicted                            |
|--------------------|---------------------------------------------------|--------------------------------------------------------------|--------------------------------------|
|                    |                                                   |                                                              | luonnelt1<br>luonne<br>highest = ... |
|                    |                                                   |                                                              | 1 tapahtui<br>potilaalle             |
| Step 1             | luonnelt1 luonne highest = tapahtui<br>potilaalle | 0 ingen händelse eller läheltä piti<br>1 tapahtui potilaalle | 0<br>0                               |
| Overall Percentage |                                                   |                                                              |                                      |

Classification Table<sup>a</sup>

| Observed           |                                                   |                                                              | Predicted             |
|--------------------|---------------------------------------------------|--------------------------------------------------------------|-----------------------|
|                    |                                                   |                                                              | Percentage<br>Correct |
|                    |                                                   |                                                              |                       |
| Step 1             | luonnelt1 luonne highest = tapahtui<br>potilaalle | 0 ingen händelse eller läheltä piti<br>1 tapahtui potilaalle | 100,0<br>,0           |
| Overall Percentage |                                                   |                                                              | 93,2                  |

a. The cut value is ,500

Variables in the Equation

|                     | B      | S.E. | Wald    | df | Sig. | Exp(B) | 95% C.I. for EXP(B) |       |
|---------------------|--------|------|---------|----|------|--------|---------------------|-------|
|                     |        |      |         |    |      |        | Lower               | Upper |
| Step 1 <sup>a</sup> |        |      |         |    |      |        |                     |       |
| sv5                 |        |      | 5,125   | 4  | ,275 |        |                     |       |
| sv5(1)              | -,090  | ,133 | ,453    | 1  | ,501 | ,914   | ,704                | 1,187 |
| sv5(2)              | -,027  | ,136 | ,040    | 1  | ,842 | ,973   | ,746                | 1,271 |
| sv5(3)              | ,009   | ,124 | ,005    | 1  | ,944 | 1,009  | ,791                | 1,287 |
| sv5(4)              | ,207   | ,133 | 2,422   | 1  | ,120 | 1,230  | ,948                | 1,598 |
| VASTY2              |        |      | 231,791 | 35 | ,000 |        |                     |       |
| VASTY2(1)           | ,055   | ,300 | ,034    | 1  | ,854 | 1,057  | ,587                | 1,903 |
| VASTY2(2)           | ,454   | ,280 | 2,626   | 1  | ,105 | 1,575  | ,909                | 2,728 |
| VASTY2(3)           | -1,378 | ,465 | 8,785   | 1  | ,003 | ,252   | ,101                | ,627  |
| VASTY2(4)           | ,225   | ,292 | ,594    | 1  | ,441 | 1,252  | ,707                | 2,220 |
| VASTY2(5)           | -,116  | ,326 | ,126    | 1  | ,722 | ,890   | ,470                | 1,688 |
| VASTY2(6)           | -1,405 | ,446 | 9,928   | 1  | ,002 | ,245   | ,102                | ,588  |
| VASTY2(7)           | ,659   | ,272 | 5,868   | 1  | ,015 | 1,933  | 1,134               | 3,296 |
| VASTY2(8)           | -,176  | ,320 | ,302    | 1  | ,583 | ,839   | ,448                | 1,572 |
| VASTY2(9)           | ,325   | ,290 | 1,256   | 1  | ,263 | 1,384  | ,784                | 2,444 |
| VASTY2(10)          | ,929   | ,267 | 12,153  | 1  | ,000 | 2,532  | 1,502               | 4,270 |
| VASTY2(11)          | ,629   | ,272 | 5,343   | 1  | ,021 | 1,875  | 1,100               | 3,196 |
| VASTY2(12)          | ,074   | ,298 | ,062    | 1  | ,804 | 1,077  | ,601                | 1,931 |
| VASTY2(13)          | ,923   | ,267 | 11,931  | 1  | ,001 | 2,518  | 1,491               | 4,252 |
| VASTY2(14)          | -,286  | ,322 | ,790    | 1  | ,374 | ,751   | ,400                | 1,412 |
| VASTY2(15)          | ,171   | ,293 | ,342    | 1  | ,559 | 1,187  | ,668                | 2,108 |
| VASTY2(16)          | ,476   | ,331 | 2,065   | 1  | ,151 | 1,609  | ,841                | 3,079 |
| VASTY2(17)          | -1,084 | ,418 | 6,723   | 1  | ,010 | ,338   | ,149                | ,768  |
| VASTY2(18)          | -,589  | ,375 | 2,465   | 1  | ,116 | ,555   | ,266                | 1,158 |
| VASTY2(19)          | -1,717 | ,555 | 9,571   | 1  | ,002 | ,180   | ,061                | ,533  |
| VASTY2(20)          | ,028   | ,316 | ,008    | 1  | ,929 | 1,029  | ,554                | 1,911 |
| VASTY2(21)          | -,076  | ,312 | ,059    | 1  | ,807 | ,927   | ,503                | 1,708 |
| VASTY2(22)          | ,244   | ,290 | ,709    | 1  | ,400 | 1,276  | ,723                | 2,252 |
| VASTY2(23)          | ,296   | ,288 | 1,060   | 1  | ,303 | 1,345  | ,765                | 2,365 |
| VASTY2(24)          | ,302   | ,285 | 1,122   | 1  | ,290 | 1,353  | ,773                | 2,365 |
| VASTY2(25)          | ,361   | ,302 | 1,436   | 1  | ,231 | 1,435  | ,795                | 2,592 |
| VASTY2(26)          | -,883  | ,419 | 4,447   | 1  | ,035 | ,414   | ,182                | ,940  |
| VASTY2(27)          | -1,493 | ,467 | 10,210  | 1  | ,001 | ,225   | ,090                | ,561  |
| VASTY2(28)          | -1,098 | ,476 | 5,322   | 1  | ,021 | ,334   | ,131                | ,848  |
| VASTY2(29)          | -1,189 | ,412 | 8,328   | 1  | ,004 | ,305   | ,136                | ,683  |
| VASTY2(30)          | -,120  | ,316 | ,145    | 1  | ,704 | ,887   | ,477                | 1,648 |
| VASTY2(31)          | ,586   | ,286 | 4,181   | 1  | ,041 | 1,796  | 1,025               | 3,149 |
| VASTY2(32)          | ,002   | ,324 | ,000    | 1  | ,994 | 1,002  | ,531                | 1,892 |
| VASTY2(33)          | ,092   | ,319 | ,084    | 1  | ,772 | 1,097  | ,587                | 2,048 |
| VASTY2(34)          | -1,236 | ,438 | 7,945   | 1  | ,005 | ,291   | ,123                | ,686  |
| VASTY2(35)          | ,728   | ,276 | 6,954   | 1  | ,008 | 2,072  | 1,206               | 3,560 |
| Constant            | -2,696 | ,229 | 138,940 | 1  | ,000 | ,067   |                     |       |

a. Variable(s) entered on step 1: sv5, VASTY2.

```
LOGISTIC REGRESSION VARIABLES luonnelt1
/METHOD=ENTER sv7 VASTY2
/CONTRAST (sv7)=Indicator(1)
/CONTRAST (VASTY2)=Indicator(1)
/PRINT=CI(95)
/CRITERIA=PIN(0.05) POUT(0.10) ITERATE(20) CUT(0.5).
```

## Block 1: Method = Enter

### Omnibus Tests of Model Coefficients

|        |       | Chi-square | df | Sig. |
|--------|-------|------------|----|------|
| Step 1 | Step  | 315,273    | 41 | ,000 |
|        | Block | 315,273    | 41 | ,000 |
|        | Model | 315,273    | 41 | ,000 |

### Model Summary

| Step | -2 Log likelihood    | Cox & Snell R Square | Nagelkerke R Square |
|------|----------------------|----------------------|---------------------|
| 1    | 5881,60 <sup>a</sup> | ,025                 | ,064                |

a. Estimation terminated at iteration number 7 because parameter estimates changed by less than ,001.

### Classification Table<sup>a</sup>

|                    |                                                | Predicted                                                    |              |
|--------------------|------------------------------------------------|--------------------------------------------------------------|--------------|
|                    |                                                | luonnelt1<br>luonne<br>highest = ..                          |              |
| Observed           |                                                | 0 ingen<br>händelse<br>eller läheltä<br>piti                 |              |
| Step 1             | luonnelt1 luonne highest = tapahtui potilaalle | 0 ingen händelse eller läheltä piti<br>1 tapahtui potilaalle | 11627<br>848 |
| Overall Percentage |                                                |                                                              |              |

Classification Table<sup>a</sup>

|                    |                                                   |                                                              | Predicted                            |
|--------------------|---------------------------------------------------|--------------------------------------------------------------|--------------------------------------|
|                    |                                                   |                                                              | luonnelt1<br>luonne<br>highest = ... |
| Observed           |                                                   |                                                              | 1 tapahtui<br>potilaalle             |
| Step 1             | luonnelt1 luonne highest = tapahtui<br>potilaalle | 0 ingen händelse eller läheltä piti<br>1 tapahtui potilaalle | 0<br>0                               |
| Overall Percentage |                                                   |                                                              |                                      |

Classification Table<sup>a</sup>

|                    |                                                   |                                                              | Predicted             |
|--------------------|---------------------------------------------------|--------------------------------------------------------------|-----------------------|
|                    |                                                   |                                                              | Percentage<br>Correct |
| Step 1             | luonnelt1 luonne highest = tapahtui<br>potilaalle | 0 ingen händelse eller läheltä piti<br>1 tapahtui potilaalle | 100,0<br>,0           |
| Overall Percentage |                                                   |                                                              | 93,2                  |

a. The cut value is ,500

## Variables in the Equation

|                         | B      | S.E. | Wald    | df | Sig. | Exp(B) | 95% C.I. for EXP(B) |       |
|-------------------------|--------|------|---------|----|------|--------|---------------------|-------|
|                         |        |      |         |    |      |        | Lower               | Upper |
| Step 1 <sup>a</sup> sv7 |        |      | 8,031   | 6  | ,236 |        |                     |       |
| sv7(1)                  | -,244  | ,152 | 2,596   | 1  | ,107 | ,783   | ,582                | 1,054 |
| sv7(2)                  | -,090  | ,158 | ,327    | 1  | ,567 | ,914   | ,671                | 1,245 |
| sv7(3)                  | -,111  | ,156 | ,507    | 1  | ,477 | ,895   | ,659                | 1,215 |
| sv7(4)                  | -,060  | ,146 | ,168    | 1  | ,682 | ,942   | ,707                | 1,255 |
| sv7(5)                  | -,014  | ,138 | ,010    | 1  | ,921 | ,986   | ,752                | 1,293 |
| sv7(6)                  | ,204   | ,153 | 1,765   | 1  | ,184 | 1,226  | ,908                | 1,655 |
| VASTY2                  |        |      | 232,195 | 35 | ,000 |        |                     |       |
| VASTY2(1)               | ,068   | ,300 | ,051    | 1  | ,821 | 1,070  | ,594                | 1,928 |
| VASTY2(2)               | ,447   | ,281 | 2,537   | 1  | ,111 | 1,564  | ,902                | 2,712 |
| VASTY2(3)               | -1,383 | ,465 | 8,849   | 1  | ,003 | ,251   | ,101                | ,624  |
| VASTY2(4)               | ,225   | ,292 | ,592    | 1  | ,442 | 1,252  | ,706                | 2,221 |
| VASTY2(5)               | -,099  | ,326 | ,092    | 1  | ,761 | ,906   | ,478                | 1,717 |
| VASTY2(6)               | -1,447 | ,449 | 10,396  | 1  | ,001 | ,235   | ,098                | ,567  |
| VASTY2(7)               | ,661   | ,272 | 5,890   | 1  | ,015 | 1,936  | 1,135               | 3,300 |
| VASTY2(8)               | -,178  | ,321 | ,308    | 1  | ,579 | ,837   | ,447                | 1,569 |
| VASTY2(9)               | ,323   | ,290 | 1,240   | 1  | ,266 | 1,381  | ,782                | 2,440 |
| VASTY2(10)              | ,921   | ,267 | 11,865  | 1  | ,001 | 2,511  | 1,487               | 4,240 |
| VASTY2(11)              | ,640   | ,272 | 5,515   | 1  | ,019 | 1,896  | 1,112               | 3,233 |
| VASTY2(12)              | ,077   | ,298 | ,066    | 1  | ,797 | 1,080  | ,602                | 1,935 |
| VASTY2(13)              | ,913   | ,268 | 11,580  | 1  | ,001 | 2,491  | 1,472               | 4,213 |
| VASTY2(14)              | -,287  | ,322 | ,794    | 1  | ,373 | ,750   | ,399                | 1,411 |
| VASTY2(15)              | ,164   | ,294 | ,310    | 1  | ,577 | 1,178  | ,662                | 2,096 |
| VASTY2(16)              | ,467   | ,332 | 1,983   | 1  | ,159 | 1,596  | ,833                | 3,059 |
| VASTY2(17)              | -1,077 | ,418 | 6,623   | 1  | ,010 | ,341   | ,150                | ,774  |
| VASTY2(18)              | -,507  | ,378 | 1,795   | 1  | ,180 | ,602   | ,287                | 1,264 |
| VASTY2(19)              | -1,627 | ,558 | 8,509   | 1  | ,004 | ,196   | ,066                | ,586  |
| VASTY2(20)              | ,016   | ,317 | ,002    | 1  | ,960 | 1,016  | ,546                | 1,890 |
| VASTY2(21)              | -,072  | ,312 | ,053    | 1  | ,817 | ,931   | ,505                | 1,715 |
| VASTY2(22)              | ,247   | ,290 | ,728    | 1  | ,393 | 1,280  | ,726                | 2,259 |
| VASTY2(23)              | ,303   | ,288 | 1,108   | 1  | ,293 | 1,354  | ,770                | 2,381 |
| VASTY2(24)              | ,302   | ,285 | 1,123   | 1  | ,289 | 1,353  | ,774                | 2,367 |
| VASTY2(25)              | ,369   | ,302 | 1,499   | 1  | ,221 | 1,447  | ,801                | 2,613 |
| VASTY2(26)              | -,878  | ,419 | 4,400   | 1  | ,036 | ,416   | ,183                | ,944  |
| VASTY2(27)              | -1,506 | ,468 | 10,348  | 1  | ,001 | ,222   | ,089                | ,555  |
| VASTY2(28)              | -1,152 | ,480 | 5,766   | 1  | ,016 | ,316   | ,123                | ,809  |
| VASTY2(29)              | -1,245 | ,417 | 8,931   | 1  | ,003 | ,288   | ,127                | ,651  |
| VASTY2(30)              | -,114  | ,316 | ,130    | 1  | ,718 | ,892   | ,480                | 1,659 |
| VASTY2(31)              | ,641   | ,287 | 4,983   | 1  | ,026 | 1,899  | 1,081               | 3,334 |
| VASTY2(32)              | ,084   | ,328 | ,066    | 1  | ,797 | 1,088  | ,572                | 2,069 |
| VASTY2(33)              | ,182   | ,324 | ,314    | 1  | ,575 | 1,199  | ,636                | 2,263 |
| VASTY2(34)              | -1,234 | ,438 | 7,924   | 1  | ,005 | ,291   | ,123                | ,687  |

## Variables in the Equation

|            | B      | S.E. | Wald    | df | Sig. | Exp(B) | 95% C.I. for EXP(B) |       |
|------------|--------|------|---------|----|------|--------|---------------------|-------|
|            |        |      |         |    |      |        | Lower               | Upper |
| VASTY2(35) | ,739   | ,277 | 7,138   | 1  | ,008 | 2,094  | 1,218               | 3,600 |
| Constant   | -2,631 | ,233 | 127,277 | 1  | ,000 | ,072   |                     |       |

a. Variable(s) entered on step 1: sv7, VASTY2.

\*\*

```
LOGISTIC REGRESSION VARIABLES seurauslt3
/METHOD=ENTER bv1 VASTY2
/CONTRAST (bv1)=Indicator(1)
/CONTRAST (VASTY2)=Indicator(1)
/PRINT=CI(95)
/CRITERIA=PIN(0.05) POUT(0.10) ITERATE(20) CUT(0.5).
```

## Block 1: Method = Enter

## Omnibus Tests of Model Coefficients

|        |       | Chi-square | df | Sig. |
|--------|-------|------------|----|------|
| Step 1 | Step  | 300,184    | 37 | ,000 |
|        | Block | 300,184    | 37 | ,000 |
|        | Model | 300,184    | 37 | ,000 |

## Model Summary

| Step | -2 Log likelihood    | Cox & Snell R Square | Nagelkerke R Square |
|------|----------------------|----------------------|---------------------|
| 1    | 3238,86 <sup>a</sup> | ,024                 | ,096                |

a. Estimation terminated at iteration number 9 because parameter estimates changed by less than ,001.

Classification Table<sup>a</sup>

| Observed           |                                   | Predicted                        |
|--------------------|-----------------------------------|----------------------------------|
|                    |                                   | seurauslt3 seuraus highest = ... |
|                    | 0 ingen händelse eller ei haittaa | 12075                            |
|                    | 1 haittaa (i någon form)          | 400                              |
| Overall Percentage |                                   |                                  |

Classification Table<sup>a</sup>

| Observed           |                                                     | Predicted                         |
|--------------------|-----------------------------------------------------|-----------------------------------|
|                    |                                                     | seurauslt3 seuraus highest = ...  |
|                    | 1 haittaa (i någon form)                            |                                   |
| Step 1             | seurauslt3 seuraus highest = haittaa (i någon form) | 0 ingen händelse eller ei haittaa |
|                    |                                                     | 1 haittaa (i någon form)          |
| Overall Percentage |                                                     |                                   |

Classification Table<sup>a</sup>

| Observed           |                                                     | Predicted          |
|--------------------|-----------------------------------------------------|--------------------|
|                    |                                                     | Percentage Correct |
| Step 1             | seurauslt3 seuraus highest = haittaa (i någon form) | 100,0              |
|                    |                                                     | ,0                 |
| Overall Percentage |                                                     | 96,8               |

a. The cut value is ,500



## Variables in the Equation

|                         | B      | S.E.  | Wald    | df | Sig. | Exp(B) | 95% C.I. for EXP(B) |       |
|-------------------------|--------|-------|---------|----|------|--------|---------------------|-------|
|                         |        |       |         |    |      |        | Lower               | Upper |
| Step 1 <sup>a</sup> bv1 |        |       | 4,262   | 2  | ,119 |        |                     |       |
| bv1(1)                  | -,197  | ,148  | 1,765   | 1  | ,184 | ,821   | ,614                | 1,098 |
| bv1(2)                  | ,124   | ,119  | 1,076   | 1  | ,300 | 1,132  | ,896                | 1,430 |
| VASTY2                  |        |       | 224,461 | 35 | ,000 |        |                     |       |
| VASTY2(1)               | ,598   | ,424  | 1,990   | 1  | ,158 | 1,818  | ,792                | 4,170 |
| VASTY2(2)               | 1,196  | ,389  | 9,428   | 1  | ,002 | 3,306  | 1,541               | 7,093 |
| VASTY2(3)               | -1,630 | ,787  | 4,283   | 1  | ,038 | ,196   | ,042                | ,917  |
| VASTY2(4)               | ,446   | ,431  | 1,070   | 1  | ,301 | 1,561  | ,671                | 3,633 |
| VASTY2(5)               | ,447   | ,441  | 1,025   | 1  | ,311 | 1,563  | ,658                | 3,710 |
| VASTY2(6)               | -1,585 | ,786  | 4,062   | 1  | ,044 | ,205   | ,044                | ,957  |
| VASTY2(7)               | ,558   | ,425  | 1,726   | 1  | ,189 | 1,747  | ,760                | 4,014 |
| VASTY2(8)               | ,242   | ,448  | ,291    | 1  | ,590 | 1,273  | ,529                | 3,065 |
| VASTY2(9)               | 1,083  | ,398  | 7,419   | 1  | ,006 | 2,954  | 1,355               | 6,442 |
| VASTY2(10)              | 1,445  | ,380  | 14,450  | 1  | ,000 | 4,244  | 2,014               | 8,942 |
| VASTY2(11)              | 1,131  | ,393  | 8,286   | 1  | ,004 | 3,098  | 1,435               | 6,690 |
| VASTY2(12)              | ,610   | ,420  | 2,110   | 1  | ,146 | 1,840  | ,808                | 4,189 |
| VASTY2(13)              | 1,428  | ,382  | 14,000  | 1  | ,000 | 4,172  | 1,974               | 8,815 |
| VASTY2(14)              | ,154   | ,457  | ,113    | 1  | ,737 | 1,166  | ,476                | 2,855 |
| VASTY2(15)              | -1,562 | ,786  | 3,953   | 1  | ,047 | ,210   | ,045                | ,978  |
| VASTY2(16)              | -,398  | ,674  | ,349    | 1  | ,555 | ,672   | ,179                | 2,516 |
| VASTY2(17)              | -,240  | ,510  | ,221    | 1  | ,638 | ,787   | ,290                | 2,137 |
| VASTY2(18)              | -1,109 | ,671  | 2,732   | 1  | ,098 | ,330   | ,088                | 1,229 |
| VASTY2(19)              | -2,077 | 1,061 | 3,833   | 1  | ,050 | ,125   | ,016                | 1,002 |
| VASTY2(20)              | ,452   | ,450  | 1,010   | 1  | ,315 | 1,572  | ,651                | 3,795 |
| VASTY2(21)              | -1,553 | ,786  | 3,907   | 1  | ,048 | ,212   | ,045                | ,987  |
| VASTY2(22)              | -,763  | ,606  | 1,581   | 1  | ,209 | ,466   | ,142                | 1,531 |
| VASTY2(23)              | ,221   | ,456  | ,236    | 1  | ,627 | 1,248  | ,511                | 3,049 |
| VASTY2(24)              | -,910  | ,607  | 2,246   | 1  | ,134 | ,403   | ,122                | 1,323 |
| VASTY2(25)              | -1,288 | ,786  | 2,688   | 1  | ,101 | ,276   | ,059                | 1,286 |
| VASTY2(26)              | -2,035 | 1,057 | 3,701   | 1  | ,054 | ,131   | ,016                | 1,039 |
| VASTY2(27)              | -,885  | ,607  | 2,129   | 1  | ,145 | ,413   | ,126                | 1,355 |
| VASTY2(28)              | -,184  | ,566  | ,106    | 1  | ,745 | ,832   | ,275                | 2,520 |
| VASTY2(29)              | -,455  | ,533  | ,731    | 1  | ,393 | ,634   | ,223                | 1,802 |
| VASTY2(30)              | -,294  | ,510  | ,333    | 1  | ,564 | ,745   | ,274                | 2,024 |
| VASTY2(31)              | 1,255  | ,389  | 10,390  | 1  | ,001 | 3,507  | 1,635               | 7,523 |
| VASTY2(32)              | -,214  | ,511  | ,175    | 1  | ,675 | ,807   | ,297                | 2,198 |
| VASTY2(33)              | -,236  | ,510  | ,213    | 1  | ,644 | ,790   | ,291                | 2,148 |
| VASTY2(34)              | -1,133 | ,671  | 2,852   | 1  | ,091 | ,322   | ,086                | 1,200 |
| VASTY2(35)              | ,075   | ,481  | ,024    | 1  | ,876 | 1,078  | ,420                | 2,766 |
| Constant                | -3,641 | ,341  | 114,195 | 1  | ,000 | ,026   |                     |       |

a. Variable(s) entered on step 1: bv1, VASTY2.

```

LOGISTIC REGRESSION VARIABLES seurauslt3
/METHOD=ENTER bv2 VASTY2
/CONTRAST (bv2)=Indicator(1)
/CONTRAST (VASTY2)=Indicator(1)
/PRINT=CI(95)
/CRITERIA=PIN(0.05) POUT(0.10) ITERATE(20) CUT(0.5).

```

## Block 1: Method = Enter

### Omnibus Tests of Model Coefficients

|        |       | Chi-square | df | Sig. |
|--------|-------|------------|----|------|
| Step 1 | Step  | 297,735    | 37 | ,000 |
|        | Block | 297,735    | 37 | ,000 |
|        | Model | 297,735    | 37 | ,000 |

### Model Summary

| Step | -2 Log likelihood    | Cox & Snell R Square | Nagelkerke R Square |
|------|----------------------|----------------------|---------------------|
| 1    | 3241,31 <sup>a</sup> | ,024                 | ,095                |

a. Estimation terminated at iteration number 9 because parameter estimates changed by less than ,001.

### Classification Table<sup>a</sup>

|                    |                                                    | Predicted                         |
|--------------------|----------------------------------------------------|-----------------------------------|
|                    |                                                    | seorauslt3 seuraus highest = ...  |
|                    |                                                    | 0 ingen händelse eller ei haittaa |
| Observed           |                                                    |                                   |
| Step 1             | seorauslt3 seuraus highest = haitta (i någon form) | 12075                             |
|                    | 0 ingen händelse eller ei haittaa                  | 400                               |
|                    | 1 haitta (i någon form)                            |                                   |
| Overall Percentage |                                                    |                                   |

Classification Table<sup>a</sup>

| Observed           |                                                    | Predicted                         |                         |
|--------------------|----------------------------------------------------|-----------------------------------|-------------------------|
|                    |                                                    | seurauslt3 seuraus highest = ...  | 1 haitta (i någon form) |
| Step 1             | seurauslt3 seuraus highest = haitta (i någon form) | 0 ingen händelse eller ei haittaa | 0                       |
|                    |                                                    | 1 haitta (i någon form)           | 0                       |
| Overall Percentage |                                                    |                                   |                         |

Classification Table<sup>a</sup>

| Observed           |                                                    | Predicted                         |       |
|--------------------|----------------------------------------------------|-----------------------------------|-------|
|                    |                                                    | Percentage Correct                |       |
| Step 1             | seurauslt3 seuraus highest = haitta (i någon form) | 0 ingen händelse eller ei haittaa | 100,0 |
|                    |                                                    | 1 haitta (i någon form)           | ,0    |
| Overall Percentage |                                                    |                                   | 96,8  |

a. The cut value is ,500

view only

## Variables in the Equation

|                         | B      | S.E.  | Wald    | df | Sig. | Exp(B) | 95% C.I. for EXP(B) |       |
|-------------------------|--------|-------|---------|----|------|--------|---------------------|-------|
|                         |        |       |         |    |      |        | Lower               | Upper |
| Step 1 <sup>a</sup> bv2 |        |       | 1,904   | 2  | ,386 |        |                     |       |
| bv2(1)                  | ,023   | ,149  | ,023    | 1  | ,879 | 1,023  | ,764                | 1,370 |
| bv2(2)                  | ,161   | ,135  | 1,416   | 1  | ,234 | 1,174  | ,901                | 1,530 |
| VASTY2                  |        |       | 226,913 | 35 | ,000 |        |                     |       |
| VASTY2(1)               | ,590   | ,424  | 1,939   | 1  | ,164 | 1,804  | ,786                | 4,138 |
| VASTY2(2)               | 1,208  | ,390  | 9,621   | 1  | ,002 | 3,347  | 1,560               | 7,182 |
| VASTY2(3)               | -1,592 | ,787  | 4,094   | 1  | ,043 | ,203   | ,044                | ,951  |
| VASTY2(4)               | ,472   | ,430  | 1,202   | 1  | ,273 | 1,603  | ,690                | 3,727 |
| VASTY2(5)               | ,454   | ,441  | 1,058   | 1  | ,304 | 1,574  | ,663                | 3,736 |
| VASTY2(6)               | -1,565 | ,786  | 3,965   | 1  | ,046 | ,209   | ,045                | ,976  |
| VASTY2(7)               | ,587   | ,423  | 1,923   | 1  | ,165 | 1,798  | ,785                | 4,122 |
| VASTY2(8)               | ,259   | ,448  | ,333    | 1  | ,564 | 1,295  | ,538                | 3,119 |
| VASTY2(9)               | 1,098  | ,398  | 7,622   | 1  | ,006 | 2,998  | 1,375               | 6,538 |
| VASTY2(10)              | 1,470  | ,380  | 14,928  | 1  | ,000 | 4,347  | 2,063               | 9,162 |
| VASTY2(11)              | 1,134  | ,393  | 8,342   | 1  | ,004 | 3,107  | 1,440               | 6,707 |
| VASTY2(12)              | ,630   | ,420  | 2,250   | 1  | ,134 | 1,877  | ,824                | 4,275 |
| VASTY2(13)              | 1,461  | ,382  | 14,620  | 1  | ,000 | 4,309  | 2,038               | 9,112 |
| VASTY2(14)              | ,165   | ,457  | ,131    | 1  | ,718 | 1,179  | ,482                | 2,887 |
| VASTY2(15)              | -1,555 | ,786  | 3,916   | 1  | ,048 | ,211   | ,045                | ,985  |
| VASTY2(16)              | -,406  | ,673  | ,364    | 1  | ,546 | ,666   | ,178                | 2,493 |
| VASTY2(17)              | -,261  | ,510  | ,262    | 1  | ,609 | ,770   | ,284                | 2,093 |
| VASTY2(18)              | -1,125 | ,671  | 2,809   | 1  | ,094 | ,325   | ,087                | 1,210 |
| VASTY2(19)              | -2,191 | 1,059 | 4,282   | 1  | ,039 | ,112   | ,014                | ,891  |
| VASTY2(20)              | ,462   | ,449  | 1,057   | 1  | ,304 | 1,587  | ,658                | 3,828 |
| VASTY2(21)              | -1,547 | ,786  | 3,881   | 1  | ,049 | ,213   | ,046                | ,992  |
| VASTY2(22)              | -,794  | ,607  | 1,715   | 1  | ,190 | ,452   | ,138                | 1,484 |
| VASTY2(23)              | ,207   | ,456  | ,207    | 1  | ,649 | 1,230  | ,504                | 3,006 |
| VASTY2(24)              | -,884  | ,607  | 2,123   | 1  | ,145 | ,413   | ,126                | 1,357 |
| VASTY2(25)              | -1,292 | ,786  | 2,704   | 1  | ,100 | ,275   | ,059                | 1,281 |
| VASTY2(26)              | -2,030 | 1,057 | 3,684   | 1  | ,055 | ,131   | ,017                | 1,044 |
| VASTY2(27)              | -,878  | ,607  | 2,092   | 1  | ,148 | ,416   | ,127                | 1,365 |
| VASTY2(28)              | -,153  | ,566  | ,073    | 1  | ,787 | ,858   | ,283                | 2,602 |
| VASTY2(29)              | -,437  | ,533  | ,673    | 1  | ,412 | ,646   | ,227                | 1,835 |
| VASTY2(30)              | -,281  | ,510  | ,303    | 1  | ,582 | ,755   | ,278                | 2,051 |
| VASTY2(31)              | 1,235  | ,388  | 10,110  | 1  | ,001 | 3,439  | 1,606               | 7,364 |
| VASTY2(32)              | -,250  | ,510  | ,240    | 1  | ,624 | ,779   | ,286                | 2,116 |
| VASTY2(33)              | -,259  | ,510  | ,259    | 1  | ,611 | ,772   | ,284                | 2,096 |
| VASTY2(34)              | -1,128 | ,671  | 2,824   | 1  | ,093 | ,324   | ,087                | 1,206 |
| VASTY2(35)              | ,092   | ,480  | ,036    | 1  | ,849 | 1,096  | ,428                | 2,807 |
| Constant                | -3,728 | ,349  | 114,019 | 1  | ,000 | ,024   |                     |       |

a. Variable(s) entered on step 1: bv2, VASTY2.

```

LOGISTIC REGRESSION VARIABLES seurauslt3
/METHOD=ENTER bv3 VASTY2
/CONTRAST (bv3)=Indicator(1)
/CONTRAST (VASTY2)=Indicator(1)
/PRINT=CI(95)
/CRITERIA=PIN(0.05) POUT(0.10) ITERATE(20) CUT(0.5).

```

## Block 1: Method = Enter

### Omnibus Tests of Model Coefficients

|        |       | Chi-square | df | Sig. |
|--------|-------|------------|----|------|
| Step 1 | Step  | 297,547    | 37 | ,000 |
|        | Block | 297,547    | 37 | ,000 |
|        | Model | 297,547    | 37 | ,000 |

### Model Summary

| Step | -2 Log likelihood    | Cox & Snell R Square | Nagelkerke R Square |
|------|----------------------|----------------------|---------------------|
| 1    | 3241,50 <sup>a</sup> | ,024                 | ,095                |

a. Estimation terminated at iteration number 9 because parameter estimates changed by less than ,001.

### Classification Table<sup>a</sup>

|                    |                                                    | Predicted                         |       |
|--------------------|----------------------------------------------------|-----------------------------------|-------|
|                    |                                                    | seorauslt3 seuraus highest = ...  |       |
| Observed           |                                                    | 0 ingen händelse eller ei haittaa |       |
| Step 1             | seorauslt3 seuraus highest = haitta (i någon form) | 0 ingen händelse eller ei haittaa | 12075 |
|                    |                                                    | 1 haitta (i någon form)           | 400   |
| Overall Percentage |                                                    |                                   |       |

Classification Table<sup>a</sup>

| Observed           |                                                    | Predicted                         |                         |
|--------------------|----------------------------------------------------|-----------------------------------|-------------------------|
|                    |                                                    | seurauslt3 seuraus highest = ...  | 1 haitta (i någon form) |
| Step 1             | seurauslt3 seuraus highest = haitta (i någon form) | 0 ingen händelse eller ei haittaa | 0                       |
|                    |                                                    | 1 haitta (i någon form)           | 0                       |
| Overall Percentage |                                                    |                                   |                         |

Classification Table<sup>a</sup>

| Observed           |                                                    | Predicted                         |       |
|--------------------|----------------------------------------------------|-----------------------------------|-------|
|                    |                                                    | Percentage Correct                |       |
| Step 1             | seurauslt3 seuraus highest = haitta (i någon form) | 0 ingen händelse eller ei haittaa | 100,0 |
|                    |                                                    | 1 haitta (i någon form)           | ,0    |
| Overall Percentage |                                                    |                                   | 96,8  |

a. The cut value is ,500

view only

Variables in the Equation

|                         | B      | S.E.  | Wald    | df | Sig. | Exp(B) | 95% C.I. for EXP(B) |       |
|-------------------------|--------|-------|---------|----|------|--------|---------------------|-------|
|                         |        |       |         |    |      |        | Lower               | Upper |
| Step 1 <sup>a</sup> bv3 |        |       | 1,703   | 2  | ,427 |        |                     |       |
| bv3(1)                  | -,161  | ,197  | ,671    | 1  | ,413 | ,851   | ,578                | 1,252 |
| bv3(2)                  | ,132   | ,148  | ,788    | 1  | ,375 | 1,141  | ,853                | 1,525 |
| VASTY2                  |        |       | 230,109 | 35 | ,000 |        |                     |       |
| VASTY2(1)               | ,614   | ,424  | 2,101   | 1  | ,147 | 1,848  | ,805                | 4,241 |
| VASTY2(2)               | 1,220  | ,389  | 9,836   | 1  | ,002 | 3,389  | 1,580               | 7,265 |
| VASTY2(3)               | -1,582 | ,787  | 4,039   | 1  | ,044 | ,206   | ,044                | ,962  |
| VASTY2(4)               | ,480   | ,431  | 1,242   | 1  | ,265 | 1,616  | ,695                | 3,759 |
| VASTY2(5)               | ,469   | ,441  | 1,130   | 1  | ,288 | 1,598  | ,673                | 3,791 |
| VASTY2(6)               | -1,559 | ,787  | 3,927   | 1  | ,048 | ,210   | ,045                | ,983  |
| VASTY2(7)               | ,587   | ,427  | 1,887   | 1  | ,170 | 1,799  | ,778                | 4,156 |
| VASTY2(8)               | ,277   | ,448  | ,382    | 1  | ,537 | 1,319  | ,548                | 3,171 |
| VASTY2(9)               | 1,117  | ,397  | 7,918   | 1  | ,005 | 3,057  | 1,404               | 6,656 |
| VASTY2(10)              | 1,480  | ,380  | 15,190  | 1  | ,000 | 4,392  | 2,087               | 9,243 |
| VASTY2(11)              | 1,145  | ,393  | 8,500   | 1  | ,004 | 3,142  | 1,455               | 6,784 |
| VASTY2(12)              | ,645   | ,419  | 2,366   | 1  | ,124 | 1,906  | ,838                | 4,334 |
| VASTY2(13)              | 1,489  | ,380  | 15,375  | 1  | ,000 | 4,433  | 2,106               | 9,331 |
| VASTY2(14)              | ,185   | ,456  | ,165    | 1  | ,684 | 1,204  | ,492                | 2,944 |
| VASTY2(15)              | -1,536 | ,785  | 3,824   | 1  | ,051 | ,215   | ,046                | 1,004 |
| VASTY2(16)              | -,402  | ,675  | ,354    | 1  | ,552 | ,669   | ,178                | 2,511 |
| VASTY2(17)              | -,254  | ,510  | ,248    | 1  | ,618 | ,776   | ,286                | 2,107 |
| VASTY2(18)              | -1,113 | ,671  | 2,747   | 1  | ,097 | ,329   | ,088                | 1,225 |
| VASTY2(19)              | -2,121 | 1,063 | 3,981   | 1  | ,046 | ,120   | ,015                | ,963  |
| VASTY2(20)              | ,475   | ,450  | 1,114   | 1  | ,291 | 1,608  | ,666                | 3,885 |
| VASTY2(21)              | -1,535 | ,785  | 3,819   | 1  | ,051 | ,215   | ,046                | 1,004 |
| VASTY2(22)              | -,805  | ,606  | 1,767   | 1  | ,184 | ,447   | ,136                | 1,465 |
| VASTY2(23)              | ,216   | ,456  | ,225    | 1  | ,636 | 1,241  | ,508                | 3,033 |
| VASTY2(24)              | -,874  | ,607  | 2,074   | 1  | ,150 | ,417   | ,127                | 1,371 |
| VASTY2(25)              | -1,284 | ,786  | 2,668   | 1  | ,102 | ,277   | ,059                | 1,292 |
| VASTY2(26)              | -2,007 | 1,057 | 3,605   | 1  | ,058 | ,134   | ,017                | 1,067 |
| VASTY2(27)              | -,851  | ,606  | 1,968   | 1  | ,161 | ,427   | ,130                | 1,402 |
| VASTY2(28)              | -,131  | ,565  | ,054    | 1  | ,816 | ,877   | ,290                | 2,653 |
| VASTY2(29)              | -,436  | ,533  | ,669    | 1  | ,413 | ,647   | ,228                | 1,837 |
| VASTY2(30)              | -,282  | ,510  | ,305    | 1  | ,580 | ,754   | ,278                | 2,049 |
| VASTY2(31)              | 1,263  | ,391  | 10,431  | 1  | ,001 | 3,536  | 1,643               | 7,611 |
| VASTY2(32)              | -,217  | ,513  | ,180    | 1  | ,672 | ,805   | ,295                | 2,198 |
| VASTY2(33)              | -,229  | ,511  | ,201    | 1  | ,654 | ,795   | ,292                | 2,167 |
| VASTY2(34)              | -1,121 | ,671  | 2,791   | 1  | ,095 | ,326   | ,088                | 1,214 |
| VASTY2(35)              | ,100   | ,482  | ,043    | 1  | ,835 | 1,106  | ,430                | 2,842 |
| Constant                | -3,667 | ,338  | 117,811 | 1  | ,000 | ,026   |                     |       |

a. Variable(s) entered on step 1: bv3, VASTY2.

```

LOGISTIC REGRESSION VARIABLES seurauslt3
/METHOD=ENTER sv3 VASTY2
/CONTRAST (sv3)=Indicator(1)
/CONTRAST (VASTY2)=Indicator(1)
/PRINT=CI(95)
/CRITERIA=PIN(0.05) POUT(0.10) ITERATE(20) CUT(0.5).

```

## Block 1: Method = Enter

### Omnibus Tests of Model Coefficients

|        |       | Chi-square | df | Sig. |
|--------|-------|------------|----|------|
| Step 1 | Step  | 296,871    | 37 | ,000 |
|        | Block | 296,871    | 37 | ,000 |
|        | Model | 296,871    | 37 | ,000 |

### Model Summary

| Step | -2 Log likelihood    | Cox & Snell R Square | Nagelkerke R Square |
|------|----------------------|----------------------|---------------------|
| 1    | 3242,18 <sup>a</sup> | ,024                 | ,095                |

a. Estimation terminated at iteration number 9 because parameter estimates changed by less than ,001.

### Classification Table<sup>a</sup>

|                    |                                                    | Predicted                         |           |
|--------------------|----------------------------------------------------|-----------------------------------|-----------|
|                    |                                                    | seurauslt3 seuraus highest = ...  |           |
| Observed           |                                                    | 0 ingen händelse eller ei haittaa | 1 haittaa |
| Step 1             | seurauslt3 seuraus highest = haitta (i någon form) | 12075                             | 400       |
| Overall Percentage |                                                    |                                   |           |



Classification Table<sup>a</sup>

| Observed           |                                                       | Predicted                                                    |
|--------------------|-------------------------------------------------------|--------------------------------------------------------------|
|                    |                                                       | seurauslt3<br>seuraus<br>highest = ...                       |
|                    |                                                       | 1 haitta (i<br>någon<br>form)                                |
| Step 1             | seurauslt3 seuraus highest = haitta (i<br>någon form) | 0 ingen händelse eller ei haittaa<br>1 haitta (i någon form) |
|                    |                                                       | 0<br>0                                                       |
| Overall Percentage |                                                       |                                                              |

Classification Table<sup>a</sup>

| Observed           |                                                       | Predicted                                                    |
|--------------------|-------------------------------------------------------|--------------------------------------------------------------|
|                    |                                                       | Percentage<br>Correct                                        |
| Step 1             | seurauslt3 seuraus highest = haitta (i<br>någon form) | 0 ingen händelse eller ei haittaa<br>1 haitta (i någon form) |
|                    |                                                       | 100,0<br>,0                                                  |
| Overall Percentage |                                                       | 96,8                                                         |

a. The cut value is ,500

view only

## Variables in the Equation

|                     | B      | S.E.  | Wald    | df | Sig. | Exp(B) | 95% C.I. for EXP(B) |       |
|---------------------|--------|-------|---------|----|------|--------|---------------------|-------|
|                     |        |       |         |    |      |        | Lower               | Upper |
| Step 1 <sup>a</sup> |        |       |         |    |      |        |                     |       |
| sv3                 |        |       | 1,026   | 2  | ,599 |        |                     |       |
| sv3(1)              | -,128  | ,156  | ,675    | 1  | ,411 | ,880   | ,649                | 1,194 |
| sv3(2)              | ,033   | ,148  | ,051    | 1  | ,822 | 1,034  | ,774                | 1,380 |
| VASTY2              |        |       | 218,913 | 35 | ,000 |        |                     |       |
| VASTY2(1)           | ,591   | ,425  | 1,936   | 1  | ,164 | 1,806  | ,785                | 4,154 |
| VASTY2(2)           | 1,185  | ,395  | 9,009   | 1  | ,003 | 3,270  | 1,508               | 7,088 |
| VASTY2(3)           | -1,505 | ,786  | 3,673   | 1  | ,055 | ,222   | ,048                | 1,035 |
| VASTY2(4)           | ,548   | ,429  | 1,635   | 1  | ,201 | 1,731  | ,747                | 4,011 |
| VASTY2(5)           | ,535   | ,443  | 1,457   | 1  | ,227 | 1,708  | ,716                | 4,072 |
| VASTY2(6)           | -1,571 | ,790  | 3,952   | 1  | ,047 | ,208   | ,044                | ,978  |
| VASTY2(7)           | ,685   | ,420  | 2,670   | 1  | ,102 | 1,985  | ,872                | 4,516 |
| VASTY2(8)           | ,327   | ,448  | ,530    | 1  | ,467 | 1,386  | ,576                | 3,339 |
| VASTY2(9)           | 1,142  | ,396  | 8,306   | 1  | ,004 | 3,134  | 1,441               | 6,817 |
| VASTY2(10)          | 1,445  | ,388  | 13,885  | 1  | ,000 | 4,242  | 1,984               | 9,073 |
| VASTY2(11)          | 1,158  | ,392  | 8,699   | 1  | ,003 | 3,182  | 1,475               | 6,867 |
| VASTY2(12)          | ,615   | ,424  | 2,109   | 1  | ,146 | 1,851  | ,806                | 4,246 |
| VASTY2(13)          | 1,472  | ,388  | 14,394  | 1  | ,000 | 4,358  | 2,037               | 9,322 |
| VASTY2(14)          | ,177   | ,458  | ,149    | 1  | ,699 | 1,194  | ,486                | 2,930 |
| VASTY2(15)          | -1,566 | ,788  | 3,946   | 1  | ,047 | ,209   | ,045                | ,979  |
| VASTY2(16)          | -,376  | ,674  | ,311    | 1  | ,577 | ,687   | ,183                | 2,573 |
| VASTY2(17)          | -,225  | ,511  | ,194    | 1  | ,660 | ,799   | ,294                | 2,173 |
| VASTY2(18)          | -1,006 | ,679  | 2,193   | 1  | ,139 | ,366   | ,097                | 1,384 |
| VASTY2(19)          | -2,117 | 1,062 | 3,975   | 1  | ,046 | ,120   | ,015                | ,965  |
| VASTY2(20)          | ,482   | ,451  | 1,145   | 1  | ,285 | 1,619  | ,670                | 3,916 |
| VASTY2(21)          | -1,498 | ,786  | 3,636   | 1  | ,057 | ,224   | ,048                | 1,043 |
| VASTY2(22)          | -,824  | ,606  | 1,851   | 1  | ,174 | ,439   | ,134                | 1,438 |
| VASTY2(23)          | ,223   | ,456  | ,238    | 1  | ,625 | 1,249  | ,511                | 3,054 |
| VASTY2(24)          | -,846  | ,606  | 1,946   | 1  | ,163 | ,429   | ,131                | 1,409 |
| VASTY2(25)          | -1,260 | ,787  | 2,566   | 1  | ,109 | ,284   | ,061                | 1,325 |
| VASTY2(26)          | -1,993 | 1,057 | 3,555   | 1  | ,059 | ,136   | ,017                | 1,082 |
| VASTY2(27)          | -,859  | ,608  | 1,993   | 1  | ,158 | ,424   | ,129                | 1,396 |
| VASTY2(28)          | -,164  | ,573  | ,082    | 1  | ,774 | ,849   | ,276                | 2,606 |
| VASTY2(29)          | -,476  | ,542  | ,771    | 1  | ,380 | ,621   | ,215                | 1,796 |
| VASTY2(30)          | -,220  | ,511  | ,185    | 1  | ,667 | ,803   | ,295                | 2,185 |
| VASTY2(31)          | 1,352  | ,399  | 11,499  | 1  | ,001 | 3,863  | 1,769               | 8,437 |
| VASTY2(32)          | -,141  | ,521  | ,073    | 1  | ,787 | ,869   | ,313                | 2,410 |
| VASTY2(33)          | -,149  | ,521  | ,082    | 1  | ,774 | ,861   | ,310                | 2,389 |
| VASTY2(34)          | -1,106 | ,671  | 2,717   | 1  | ,099 | ,331   | ,089                | 1,233 |
| VASTY2(35)          | ,154   | ,479  | ,104    | 1  | ,747 | 1,167  | ,457                | 2,982 |
| Constant            | -3,652 | ,344  | 112,787 | 1  | ,000 | ,026   |                     |       |

a. Variable(s) entered on step 1: sv3, VASTY2.

```

LOGISTIC REGRESSION VARIABLES seurauslt3
/METHOD=ENTER sv5 VASTY2
/CONTRAST (sv5)=Indicator(1)
/CONTRAST (VASTY2)=Indicator(1)
/PRINT=CI(95)
/CRITERIA=PIN(0.05) POUT(0.10) ITERATE(20) CUT(0.5).
    
```

**Block 1: Method = Enter**

**Omnibus Tests of Model Coefficients**

|        |       | Chi-square | df | Sig. |
|--------|-------|------------|----|------|
| Step 1 | Step  | 298,546    | 39 | ,000 |
|        | Block | 298,546    | 39 | ,000 |
|        | Model | 298,546    | 39 | ,000 |

**Model Summary**

| Step | -2 Log likelihood    | Cox & Snell R Square | Nagelkerke R Square |
|------|----------------------|----------------------|---------------------|
| 1    | 3240,50 <sup>a</sup> | ,024                 | ,096                |

a. Estimation terminated at iteration number 9 because parameter estimates changed by less than ,001.

**Classification Table<sup>a</sup>**

|                    |                                                    | Predicted                         |
|--------------------|----------------------------------------------------|-----------------------------------|
|                    |                                                    | seurauslt3 seuraus highest = ...  |
|                    |                                                    | 0 ingen händelse eller ei haittaa |
| Observed           |                                                    |                                   |
| Step 1             | seurauslt3 seuraus highest = haitta (i någon form) | 12075                             |
|                    | 0 ingen händelse eller ei haittaa                  | 400                               |
|                    | 1 haitta (i någon form)                            |                                   |
| Overall Percentage |                                                    |                                   |

Classification Table<sup>a</sup>

| Observed |                                                       | Predicted                                                    |
|----------|-------------------------------------------------------|--------------------------------------------------------------|
|          |                                                       | seurauslt3<br>seuraus<br>highest = ...                       |
|          |                                                       | 1 haitta (i<br>någon<br>form)                                |
| Step 1   | seurauslt3 seuraus highest = haitta (i<br>någon form) | 0 ingen händelse eller ei haittaa<br>1 haitta (i någon form) |
|          | Overall Percentage                                    | 0<br>0                                                       |

Classification Table<sup>a</sup>

| Observed |                                                       | Predicted                                                    |
|----------|-------------------------------------------------------|--------------------------------------------------------------|
|          |                                                       | Percentage<br>Correct                                        |
| Step 1   | seurauslt3 seuraus highest = haitta (i<br>någon form) | 0 ingen händelse eller ei haittaa<br>1 haitta (i någon form) |
|          | Overall Percentage                                    | 100,0<br>,0<br>96,8                                          |

a. The cut value is ,500

view only

Variables in the Equation

|                     | B      | S.E.  | Wald    | df | Sig. | Exp(B) | 95% C.I. for EXP(B) |       |
|---------------------|--------|-------|---------|----|------|--------|---------------------|-------|
|                     |        |       |         |    |      |        | Lower               | Upper |
| Step 1 <sup>a</sup> |        |       |         |    |      |        |                     |       |
| sv5                 |        |       | 2,683   | 4  | ,612 |        |                     |       |
| sv5(1)              | ,002   | ,197  | ,000    | 1  | ,991 | 1,002  | ,681                | 1,475 |
| sv5(2)              | -,114  | ,207  | ,305    | 1  | ,581 | ,892   | ,594                | 1,339 |
| sv5(3)              | ,102   | ,181  | ,319    | 1  | ,572 | 1,108  | ,777                | 1,580 |
| sv5(4)              | ,218   | ,193  | 1,276   | 1  | ,259 | 1,244  | ,852                | 1,816 |
| VASTY2              |        |       | 215,380 | 35 | ,000 |        |                     |       |
| VASTY2(1)           | ,552   | ,425  | 1,687   | 1  | ,194 | 1,737  | ,755                | 3,995 |
| VASTY2(2)           | 1,104  | ,398  | 7,707   | 1  | ,006 | 3,017  | 1,384               | 6,579 |
| VASTY2(3)           | -1,501 | ,786  | 3,650   | 1  | ,056 | ,223   | ,048                | 1,040 |
| VASTY2(4)           | ,539   | ,429  | 1,579   | 1  | ,209 | 1,714  | ,740                | 3,974 |
| VASTY2(5)           | ,524   | ,444  | 1,395   | 1  | ,238 | 1,689  | ,708                | 4,033 |
| VASTY2(6)           | -1,685 | ,794  | 4,507   | 1  | ,034 | ,185   | ,039                | ,879  |
| VASTY2(7)           | ,675   | ,420  | 2,593   | 1  | ,107 | 1,965  | ,864                | 4,471 |
| VASTY2(8)           | ,346   | ,449  | ,593    | 1  | ,441 | 1,413  | ,586                | 3,409 |
| VASTY2(9)           | 1,136  | ,397  | 8,204   | 1  | ,004 | 3,113  | 1,431               | 6,772 |
| VASTY2(10)          | 1,351  | ,392  | 11,907  | 1  | ,001 | 3,863  | 1,793               | 8,323 |
| VASTY2(11)          | 1,141  | ,393  | 8,452   | 1  | ,004 | 3,131  | 1,450               | 6,757 |
| VASTY2(12)          | ,554   | ,425  | 1,701   | 1  | ,192 | 1,740  | ,757                | 4,000 |
| VASTY2(13)          | 1,373  | ,392  | 12,289  | 1  | ,000 | 3,949  | 1,832               | 8,511 |
| VASTY2(14)          | ,119   | ,460  | ,067    | 1  | ,796 | 1,126  | ,458                | 2,772 |
| VASTY2(15)          | -1,641 | ,789  | 4,323   | 1  | ,038 | ,194   | ,041                | ,910  |
| VASTY2(16)          | -,439  | ,675  | ,422    | 1  | ,516 | ,645   | ,172                | 2,422 |
| VASTY2(17)          | -,244  | ,511  | ,229    | 1  | ,633 | ,783   | ,288                | 2,132 |
| VASTY2(18)          | -1,084 | ,684  | 2,515   | 1  | ,113 | ,338   | ,089                | 1,292 |
| VASTY2(19)          | -2,200 | 1,065 | 4,262   | 1  | ,039 | ,111   | ,014                | ,895  |
| VASTY2(20)          | ,414   | ,453  | ,837    | 1  | ,360 | 1,513  | ,623                | 3,676 |
| VASTY2(21)          | -1,514 | ,786  | 3,711   | 1  | ,054 | ,220   | ,047                | 1,027 |
| VASTY2(22)          | -,831  | ,606  | 1,883   | 1  | ,170 | ,436   | ,133                | 1,427 |
| VASTY2(23)          | ,212   | ,456  | ,217    | 1  | ,642 | 1,237  | ,506                | 3,024 |
| VASTY2(24)          | -,880  | ,607  | 2,103   | 1  | ,147 | ,415   | ,126                | 1,362 |
| VASTY2(25)          | -1,260 | ,787  | 2,563   | 1  | ,109 | ,284   | ,061                | 1,327 |
| VASTY2(26)          | -2,018 | 1,057 | 3,643   | 1  | ,056 | ,133   | ,017                | 1,056 |
| VASTY2(27)          | -,929  | ,610  | 2,324   | 1  | ,127 | ,395   | ,120                | 1,304 |
| VASTY2(28)          | -,294  | ,580  | ,257    | 1  | ,612 | ,745   | ,239                | 2,321 |
| VASTY2(29)          | -,611  | ,550  | 1,234   | 1  | ,267 | ,543   | ,185                | 1,595 |
| VASTY2(30)          | -,220  | ,511  | ,184    | 1  | ,668 | ,803   | ,295                | 2,187 |
| VASTY2(31)          | 1,292  | ,403  | 10,262  | 1  | ,001 | 3,639  | 1,651               | 8,020 |
| VASTY2(32)          | -,220  | ,526  | ,174    | 1  | ,676 | ,803   | ,286                | 2,253 |
| VASTY2(33)          | -,232  | ,527  | ,193    | 1  | ,661 | ,793   | ,282                | 2,230 |
| VASTY2(34)          | -1,114 | ,671  | 2,757   | 1  | ,097 | ,328   | ,088                | 1,223 |
| VASTY2(35)          | ,112   | ,479  | ,055    | 1  | ,815 | 1,118  | ,437                | 2,860 |
| Constant            | -3,700 | ,357  | 107,608 | 1  | ,000 | ,025   |                     |       |

a. Variable(s) entered on step 1: sv5, VASTY2.

```
LOGISTIC REGRESSION VARIABLES seurauslt3
/METHOD=ENTER sv7 VASTY2
/CONTRAST (sv7)=Indicator(1)
/CONTRAST (VASTY2)=Indicator(1)
/PRINT=CI(95)
/CRITERIA=PIN(0.05) POUT(0.10) ITERATE(20) CUT(0.5).
```

## Block 1: Method = Enter

### Omnibus Tests of Model Coefficients

|        |       | Chi-square | df | Sig. |
|--------|-------|------------|----|------|
| Step 1 | Step  | 299,651    | 41 | ,000 |
|        | Block | 299,651    | 41 | ,000 |
|        | Model | 299,651    | 41 | ,000 |

### Model Summary

| Step | -2 Log likelihood    | Cox & Snell R Square | Nagelkerke R Square |
|------|----------------------|----------------------|---------------------|
| 1    | 3239,40 <sup>a</sup> | ,024                 | ,096                |

a. Estimation terminated at iteration number 9 because parameter estimates changed by less than ,001.

Classification Table<sup>a</sup>

|                    |                                                    | Predicted                         |
|--------------------|----------------------------------------------------|-----------------------------------|
|                    |                                                    | seorauslt3 seuraus highest = ..   |
|                    |                                                    | 0 ingen händelse eller ei haittaa |
| Observed           |                                                    |                                   |
| Step 1             | seorauslt3 seuraus highest = haitta (i någon form) | 12075                             |
|                    | 0 ingen händelse eller ei haittaa                  | 400                               |
|                    | 1 haitta (i någon form)                            |                                   |
| Overall Percentage |                                                    |                                   |

Classification Table<sup>a</sup>

| Observed           |                                                       | Predicted                                                    |
|--------------------|-------------------------------------------------------|--------------------------------------------------------------|
|                    |                                                       | seurauslt3<br>seuraus<br>highest = ...                       |
|                    |                                                       | 1 haitta (i<br>någon<br>form)                                |
| Step 1             | seurauslt3 seuraus highest = haitta (i<br>någon form) | 0 ingen händelse eller ei haittaa<br>1 haitta (i någon form) |
| Overall Percentage |                                                       | 0<br>0                                                       |

Classification Table<sup>a</sup>

| Observed           |                                                       | Predicted                                                    |
|--------------------|-------------------------------------------------------|--------------------------------------------------------------|
|                    |                                                       | Percentage<br>Correct                                        |
| Step 1             | seurauslt3 seuraus highest = haitta (i<br>någon form) | 0 ingen händelse eller ei haittaa<br>1 haitta (i någon form) |
| Overall Percentage |                                                       | 100,0<br>,0<br>96,8                                          |

a. The cut value is ,500

view only

## Variables in the Equation

|                         | B      | S.E.  | Wald    | df | Sig. | Exp(B) | 95% C.I. for EXP(B) |       |
|-------------------------|--------|-------|---------|----|------|--------|---------------------|-------|
|                         |        |       |         |    |      |        | Lower               | Upper |
| Step 1 <sup>a</sup> sv7 |        |       | 3,796   | 6  | ,704 |        |                     |       |
| sv7(1)                  | -,122  | ,221  | ,304    | 1  | ,581 | ,885   | ,575                | 1,365 |
| sv7(2)                  | -,210  | ,243  | ,746    | 1  | ,388 | ,810   | ,503                | 1,306 |
| sv7(3)                  | -,007  | ,228  | ,001    | 1  | ,975 | ,993   | ,635                | 1,553 |
| sv7(4)                  | ,145   | ,209  | ,481    | 1  | ,488 | 1,156  | ,768                | 1,741 |
| sv7(5)                  | -,028  | ,201  | ,020    | 1  | ,889 | ,972   | ,655                | 1,442 |
| sv7(6)                  | ,174   | ,219  | ,633    | 1  | ,426 | 1,190  | ,775                | 1,829 |
| VASTY2                  |        |       | 218,650 | 35 | ,000 |        |                     |       |
| VASTY2(1)               | ,598   | ,425  | 1,974   | 1  | ,160 | 1,818  | ,790                | 4,184 |
| VASTY2(2)               | 1,156  | ,398  | 8,426   | 1  | ,004 | 3,179  | 1,456               | 6,940 |
| VASTY2(3)               | -1,493 | ,786  | 3,609   | 1  | ,057 | ,225   | ,048                | 1,049 |
| VASTY2(4)               | ,571   | ,429  | 1,766   | 1  | ,184 | 1,769  | ,763                | 4,104 |
| VASTY2(5)               | ,551   | ,444  | 1,539   | 1  | ,215 | 1,734  | ,727                | 4,140 |
| VASTY2(6)               | -1,653 | ,797  | 4,307   | 1  | ,038 | ,191   | ,040                | ,912  |
| VASTY2(7)               | ,680   | ,420  | 2,625   | 1  | ,105 | 1,973  | ,867                | 4,490 |
| VASTY2(8)               | ,342   | ,449  | ,578    | 1  | ,447 | 1,407  | ,583                | 3,396 |
| VASTY2(9)               | 1,153  | ,397  | 8,446   | 1  | ,004 | 3,167  | 1,455               | 6,891 |
| VASTY2(10)              | 1,408  | ,393  | 12,857  | 1  | ,000 | 4,087  | 1,893               | 8,824 |
| VASTY2(11)              | 1,169  | ,393  | 8,848   | 1  | ,003 | 3,220  | 1,490               | 6,958 |
| VASTY2(12)              | ,599   | ,424  | 1,993   | 1  | ,158 | 1,820  | ,793                | 4,181 |
| VASTY2(13)              | 1,428  | ,393  | 13,212  | 1  | ,000 | 4,170  | 1,931               | 9,006 |
| VASTY2(14)              | ,162   | ,460  | ,124    | 1  | ,724 | 1,176  | ,478                | 2,895 |
| VASTY2(15)              | -1,594 | ,790  | 4,072   | 1  | ,044 | ,203   | ,043                | ,955  |
| VASTY2(16)              | -,401  | ,676  | ,352    | 1  | ,553 | ,670   | ,178                | 2,517 |
| VASTY2(17)              | -,208  | ,511  | ,166    | 1  | ,684 | ,812   | ,298                | 2,212 |
| VASTY2(18)              | -,988  | ,687  | 2,069   | 1  | ,150 | ,372   | ,097                | 1,431 |
| VASTY2(19)              | -2,101 | 1,068 | 3,865   | 1  | ,049 | ,122   | ,015                | ,993  |
| VASTY2(20)              | ,452   | ,454  | ,992    | 1  | ,319 | 1,571  | ,646                | 3,823 |
| VASTY2(21)              | -1,492 | ,786  | 3,607   | 1  | ,058 | ,225   | ,048                | 1,049 |
| VASTY2(22)              | -,822  | ,606  | 1,841   | 1  | ,175 | ,440   | ,134                | 1,441 |
| VASTY2(23)              | ,233   | ,456  | ,262    | 1  | ,609 | 1,263  | ,516                | 3,089 |
| VASTY2(24)              | -,857  | ,607  | 1,996   | 1  | ,158 | ,424   | ,129                | 1,394 |
| VASTY2(25)              | -1,242 | ,787  | 2,490   | 1  | ,115 | ,289   | ,062                | 1,351 |
| VASTY2(26)              | -2,000 | 1,057 | 3,580   | 1  | ,058 | ,135   | ,017                | 1,074 |
| VASTY2(27)              | -,885  | ,611  | 2,100   | 1  | ,147 | ,413   | ,125                | 1,366 |
| VASTY2(28)              | -,270  | ,585  | ,213    | 1  | ,644 | ,763   | ,242                | 2,404 |
| VASTY2(29)              | -,588  | ,556  | 1,116   | 1  | ,291 | ,556   | ,187                | 1,653 |
| VASTY2(30)              | -,202  | ,511  | ,155    | 1  | ,693 | ,817   | ,300                | 2,227 |
| VASTY2(31)              | 1,376  | ,405  | 11,558  | 1  | ,001 | 3,957  | 1,791               | 8,747 |
| VASTY2(32)              | -,123  | ,531  | ,054    | 1  | ,817 | ,884   | ,312                | 2,503 |
| VASTY2(33)              | -,133  | ,533  | ,062    | 1  | ,804 | ,876   | ,308                | 2,492 |
| VASTY2(34)              | -1,103 | ,671  | 2,701   | 1  | ,100 | ,332   | ,089                | 1,237 |



**Variables in the Equation**

|            | B      | S.E. | Wald    | df | Sig. | Exp(B) | 95% C.I. for EXP(B) |       |
|------------|--------|------|---------|----|------|--------|---------------------|-------|
|            |        |      |         |    |      |        | Lower               | Upper |
| VASTY2(35) | ,154   | ,479 | ,104    | 1  | ,747 | 1,167  | ,456                | 2,987 |
| Constant   | -3,675 | ,363 | 102,427 | 1  | ,000 | ,025   |                     |       |

a. Variable(s) entered on step 1: sv7, VASTY2.

\*\*

```
LOGISTIC REGRESSION VARIABLES handlt1
/METHOD=ENTER bv1 VASTY2
/CONTRAST (bv1)=Indicator(1)
/CONTRAST (VASTY2)=Indicator(1)
/PRINT=CI(95)
/CRITERIA=PIN(0.05) POUT(0.10) ITERATE(20) CUT(0.5).
```

**Block 1: Method = Enter**

**Omnibus Tests of Model Coefficients**

|        |       | Chi-square | df | Sig. |
|--------|-------|------------|----|------|
| Step 1 | Step  | 220,073    | 37 | ,000 |
|        | Block | 220,073    | 37 | ,000 |
|        | Model | 220,073    | 37 | ,000 |

**Model Summary**

| Step | -2 Log likelihood    | Cox & Snell R Square | Nagelkerke R Square |
|------|----------------------|----------------------|---------------------|
| 1    | 2198,71 <sup>a</sup> | ,017                 | ,099                |

a. Estimation terminated at iteration number 20 because maximum iterations has been reached. Final solution cannot be found.

Classification Table<sup>a</sup>

| Observed           |                                | Predicted                      |                      |
|--------------------|--------------------------------|--------------------------------|----------------------|
|                    |                                | handlt1 händelse larger than 1 |                      |
|                    |                                | 0 ingen eller en händelse      | 1 mer än en händelse |
| Step 1             | handlt1 händelse larger than 1 | 0 ingen eller en händelse      | 12229                |
|                    |                                | 1 mer än en händelse           | 246                  |
| Overall Percentage |                                |                                |                      |

Classification Table<sup>a</sup>

| Observed           |                                | Predicted          |
|--------------------|--------------------------------|--------------------|
|                    |                                | Percentage Correct |
| Step 1             | handlt1 händelse larger than 1 | 100,0              |
|                    |                                | ,0                 |
| Overall Percentage |                                | 98,0               |

a. The cut value is ,500

Variables in the Equation

|                     |            | B       | S.E.     | Wald    | df | Sig. | Exp(B) | 95% C.I.<br>Lower |
|---------------------|------------|---------|----------|---------|----|------|--------|-------------------|
| Step 1 <sup>a</sup> | bv1        |         |          | 10,930  | 2  | ,004 |        |                   |
|                     | bv1(1)     | -,349   | ,189     | 3,402   | 1  | ,065 | ,706   | ,487              |
|                     | bv1(2)     | ,302    | ,152     | 3,935   | 1  | ,047 | 1,352  | 1,004             |
|                     | VASTY2     |         |          | 120,570 | 35 | ,000 |        |                   |
|                     | VASTY2(1)  | ,467    | ,575     | ,658    | 1  | ,417 | 1,595  | ,516              |
|                     | VASTY2(2)  | ,739    | ,545     | 1,837   | 1  | ,175 | 2,094  | ,719              |
|                     | VASTY2(3)  | -1,847  | 1,101    | 2,816   | 1  | ,093 | ,158   | ,018              |
|                     | VASTY2(4)  | ,299    | ,578     | ,267    | 1  | ,605 | 1,348  | ,434              |
|                     | VASTY2(5)  | -,501   | ,735     | ,464    | 1  | ,496 | ,606   | ,143              |
|                     | VASTY2(6)  | -17,067 | 2099,887 | ,000    | 1  | ,994 | ,000   | ,000              |
|                     | VASTY2(7)  | ,661    | ,545     | 1,471   | 1  | ,225 | 1,936  | ,666              |
|                     | VASTY2(8)  | ,228    | ,591     | ,149    | 1  | ,699 | 1,257  | ,394              |
|                     | VASTY2(9)  | ,126    | ,612     | ,042    | 1  | ,837 | 1,134  | ,342              |
|                     | VASTY2(10) | 1,478   | ,500     | 8,729   | 1  | ,003 | 4,384  | 1,645             |
|                     | VASTY2(11) | 1,431   | ,504     | 8,054   | 1  | ,005 | 4,182  | 1,557             |
|                     | VASTY2(12) | -,618   | ,735     | ,708    | 1  | ,400 | ,539   | ,128              |
|                     | VASTY2(13) | -,205   | ,640     | ,102    | 1  | ,749 | ,815   | ,232              |
|                     | VASTY2(14) | ,065    | ,612     | ,011    | 1  | ,915 | 1,068  | ,322              |
|                     | VASTY2(15) | ,103    | ,611     | ,028    | 1  | ,866 | 1,108  | ,335              |

Variables in the Equation

|                     |            | 95% C.I... |
|---------------------|------------|------------|
|                     |            | Upper      |
| Step 1 <sup>a</sup> | bv1        |            |
|                     | bv1(1)     | 1,022      |
|                     | bv1(2)     | 1,822      |
|                     | VASTY2     |            |
|                     | VASTY2(1)  | 4,926      |
|                     | VASTY2(2)  | 6,094      |
|                     | VASTY2(3)  | 1,364      |
|                     | VASTY2(4)  | 4,189      |
|                     | VASTY2(5)  | 2,561      |
|                     | VASTY2(6)  | .          |
|                     | VASTY2(7)  | 5,633      |
|                     | VASTY2(8)  | 4,006      |
|                     | VASTY2(9)  | 3,765      |
|                     | VASTY2(10) | 11,685     |
|                     | VASTY2(11) | 11,233     |
|                     | VASTY2(12) | 2,275      |
|                     | VASTY2(13) | 2,858      |
|                     | VASTY2(14) | 3,543      |
|                     | VASTY2(15) | 3,670      |

Peer review only

## Variables in the Equation

|            | B       | S.E.     | Wald   | df | Sig. | Exp(B) | 95% C.I. |
|------------|---------|----------|--------|----|------|--------|----------|
|            |         |          |        |    |      |        | Lower    |
| VASTY2(16) | ,164    | ,738     | ,050   | 1  | ,824 | 1,179  | ,278     |
| VASTY2(17) | -16,898 | 2096,665 | ,000   | 1  | ,994 | ,000   | ,000     |
| VASTY2(18) | -16,941 | 2104,491 | ,000   | 1  | ,994 | ,000   | ,000     |
| VASTY2(19) | -1,349  | 1,105    | 1,490  | 1  | ,222 | ,260   | ,030     |
| VASTY2(20) | -,442   | ,737     | ,359   | 1  | ,549 | ,643   | ,152     |
| VASTY2(21) | -,582   | ,735     | ,629   | 1  | ,428 | ,559   | ,132     |
| VASTY2(22) | ,725    | ,565     | 1,647  | 1  | ,199 | 2,064  | ,683     |
| VASTY2(23) | 1,650   | ,498     | 10,989 | 1  | ,001 | 5,208  | 1,963    |
| VASTY2(24) | 1,197   | ,512     | 5,478  | 1  | ,019 | 3,311  | 1,215    |
| VASTY2(25) | ,586    | ,591     | ,984   | 1  | ,321 | 1,798  | ,564     |
| VASTY2(26) | -,096   | ,677     | ,020   | 1  | ,888 | ,909   | ,241     |
| VASTY2(27) | -1,757  | 1,099    | 2,555  | 1  | ,110 | ,173   | ,020     |
| VASTY2(28) | -1,293  | 1,100    | 1,382  | 1  | ,240 | ,274   | ,032     |
| VASTY2(29) | -17,003 | 2095,464 | ,000   | 1  | ,994 | ,000   | ,000     |
| VASTY2(30) | ,402    | ,576     | ,487   | 1  | ,485 | 1,495  | ,484     |
| VASTY2(31) | 1,084   | ,524     | 4,279  | 1  | ,039 | 2,958  | 1,059    |
| VASTY2(32) | ,050    | ,639     | ,006   | 1  | ,938 | 1,051  | ,301     |
| VASTY2(33) | -,206   | ,676     | ,093   | 1  | ,760 | ,814   | ,216     |
| VASTY2(34) | -1,664  | 1,098    | 2,295  | 1  | ,130 | ,189   | ,022     |
| VASTY2(35) | ,954    | ,537     | 3,156  | 1  | ,076 | 2,596  | ,906     |
| Constant   | -4,232  | ,454     | 86,955 | 1  | ,000 | ,015   |          |

## Variables in the Equation

|            | 95% C.I... |
|------------|------------|
|            | Upper      |
| VASTY2(16) | 5,003      |
| VASTY2(17) | .          |
| VASTY2(18) | .          |
| VASTY2(19) | 2,263      |
| VASTY2(20) | 2,725      |
| VASTY2(21) | 2,357      |
| VASTY2(22) | 6,240      |
| VASTY2(23) | 13,818     |
| VASTY2(24) | 9,024      |
| VASTY2(25) | 5,726      |
| VASTY2(26) | 3,425      |
| VASTY2(27) | 1,488      |
| VASTY2(28) | 2,370      |
| VASTY2(29) | .          |
| VASTY2(30) | 4,618      |
| VASTY2(31) | 8,264      |
| VASTY2(32) | 3,675      |
| VASTY2(33) | 3,060      |
| VASTY2(34) | 1,630      |
| VASTY2(35) | 7,438      |
| Constant   |            |

a. Variable(s) entered on step 1: bv1, VASTY2.

```
LOGISTIC REGRESSION VARIABLES handlt1
/METHOD=ENTER bv2 VASTY2
/CONTRAST (bv2)=Indicator(1)
/CONTRAST (VASTY2)=Indicator(1)
/PRINT=CI(95)
/CRITERIA=PIN(0.05) POUT(0.10) ITERATE(20) CUT(0.5).
```

**Block 1: Method = Enter****Omnibus Tests of Model Coefficients**

|        |       | Chi-square | df | Sig. |
|--------|-------|------------|----|------|
| Step 1 | Step  | 217,446    | 37 | ,000 |
|        | Block | 217,446    | 37 | ,000 |
|        | Model | 217,446    | 37 | ,000 |

**Model Summary**

| Step | -2 Log likelihood    | Cox & Snell R Square | Nagelkerke R Square |
|------|----------------------|----------------------|---------------------|
| 1    | 2201,34 <sup>a</sup> | ,017                 | ,098                |

a. Estimation terminated at iteration number 20 because maximum iterations has been reached. Final solution cannot be found.

**Classification Table<sup>a</sup>**

| Observed           |                                |                           | Predicted                 |                      |
|--------------------|--------------------------------|---------------------------|---------------------------|----------------------|
|                    |                                |                           | 0 ingen eller en händelse | 1 mer än en händelse |
| Step 1             | handlt1 händelse larger than 1 | 0 ingen eller en händelse | 12229                     | 0                    |
|                    |                                | 1 mer än en händelse      | 246                       | 0                    |
| Overall Percentage |                                |                           |                           |                      |

**Classification Table<sup>a</sup>**

| Observed           |                                |                           | Predicted          |
|--------------------|--------------------------------|---------------------------|--------------------|
|                    |                                |                           | Percentage Correct |
| Step 1             | handlt1 händelse larger than 1 | 0 ingen eller en händelse | 100,0              |
|                    |                                | 1 mer än en händelse      | ,0                 |
| Overall Percentage |                                |                           | 98,0               |

a. The cut value is ,500

## Variables in the Equation

|                     |            | B       | S.E.     | Wald    | df | Sig. | Exp(B) | 95% C.I. |
|---------------------|------------|---------|----------|---------|----|------|--------|----------|
|                     |            |         |          |         |    |      |        | Lower    |
| Step 1 <sup>a</sup> | bv2        |         |          | 8,427   | 2  | ,015 |        |          |
|                     | bv2(1)     | -,248   | ,188     | 1,736   | 1  | ,188 | ,780   | ,539     |
|                     | bv2(2)     | ,231    | ,170     | 1,847   | 1  | ,174 | 1,260  | ,903     |
|                     | VASTY2     |         |          | 120,796 | 35 | ,000 |        |          |
|                     | VASTY2(1)  | ,455    | ,575     | ,627    | 1  | ,429 | 1,577  | ,511     |
|                     | VASTY2(2)  | ,741    | ,545     | 1,845   | 1  | ,174 | 2,097  | ,720     |
|                     | VASTY2(3)  | -1,802  | 1,100    | 2,684   | 1  | ,101 | ,165   | ,019     |
|                     | VASTY2(4)  | ,330    | ,578     | ,327    | 1  | ,567 | 1,391  | ,449     |
|                     | VASTY2(5)  | -,493   | ,735     | ,450    | 1  | ,502 | ,611   | ,145     |
|                     | VASTY2(6)  | -17,032 | 2101,796 | ,000    | 1  | ,994 | ,000   | ,000     |
|                     | VASTY2(7)  | ,708    | ,543     | 1,701   | 1  | ,192 | 2,030  | ,701     |
|                     | VASTY2(8)  | ,231    | ,592     | ,153    | 1  | ,696 | 1,260  | ,395     |
|                     | VASTY2(9)  | ,136    | ,612     | ,050    | 1  | ,824 | 1,146  | ,345     |
|                     | VASTY2(10) | 1,486   | ,500     | 8,827   | 1  | ,003 | 4,421  | 1,658    |
|                     | VASTY2(11) | 1,443   | ,504     | 8,206   | 1  | ,004 | 4,234  | 1,577    |
|                     | VASTY2(12) | -,610   | ,735     | ,689    | 1  | ,406 | ,543   | ,129     |
|                     | VASTY2(13) | -,185   | ,640     | ,084    | 1  | ,772 | ,831   | ,237     |
|                     | VASTY2(14) | ,079    | ,612     | ,017    | 1  | ,898 | 1,082  | ,326     |
|                     | VASTY2(15) | ,098    | ,611     | ,026    | 1  | ,872 | 1,103  | ,333     |
|                     | VASTY2(16) | ,182    | ,737     | ,061    | 1  | ,805 | 1,199  | ,283     |
|                     | VASTY2(17) | -16,892 | 2098,459 | ,000    | 1  | ,994 | ,000   | ,000     |
|                     | VASTY2(18) | -16,938 | 2106,705 | ,000    | 1  | ,994 | ,000   | ,000     |
|                     | VASTY2(19) | -1,413  | 1,102    | 1,644   | 1  | ,200 | ,243   | ,028     |
|                     | VASTY2(20) | -,412   | ,736     | ,313    | 1  | ,576 | ,662   | ,157     |
|                     | VASTY2(21) | -,575   | ,735     | ,614    | 1  | ,433 | ,562   | ,133     |
|                     | VASTY2(22) | ,730    | ,565     | 1,667   | 1  | ,197 | 2,074  | ,685     |
|                     | VASTY2(23) | 1,641   | ,498     | 10,875  | 1  | ,001 | 5,161  | 1,946    |
|                     | VASTY2(24) | 1,230   | ,511     | 5,786   | 1  | ,016 | 3,420  | 1,256    |
|                     | VASTY2(25) | ,594    | ,591     | 1,011   | 1  | ,315 | 1,812  | ,569     |
|                     | VASTY2(26) | -,088   | ,677     | ,017    | 1  | ,897 | ,916   | ,243     |
|                     | VASTY2(27) | -1,742  | 1,099    | 2,512   | 1  | ,113 | ,175   | ,020     |
|                     | VASTY2(28) | -1,289  | 1,100    | 1,372   | 1  | ,241 | ,276   | ,032     |
|                     | VASTY2(29) | -16,985 | 2096,165 | ,000    | 1  | ,994 | ,000   | ,000     |
|                     | VASTY2(30) | ,418    | ,576     | ,526    | 1  | ,468 | 1,518  | ,491     |
|                     | VASTY2(31) | 1,095   | ,523     | 4,379   | 1  | ,036 | 2,989  | 1,072    |
|                     | VASTY2(32) | ,045    | ,638     | ,005    | 1  | ,944 | 1,046  | ,300     |
|                     | VASTY2(33) | -,206   | ,676     | ,093    | 1  | ,760 | ,813   | ,216     |
|                     | VASTY2(34) | -1,654  | 1,098    | 2,268   | 1  | ,132 | ,191   | ,022     |
|                     | VASTY2(35) | ,998    | ,535     | 3,475   | 1  | ,062 | 2,713  | ,950     |
|                     | Constant   | -4,243  | ,463     | 84,086  | 1  | ,000 | ,014   |          |

## Variables in the Equation

|                     |            | 95% C.I... |
|---------------------|------------|------------|
|                     |            | Upper      |
| Step 1 <sup>a</sup> | bv2        |            |
|                     | bv2(1)     | 1,129      |
|                     | bv2(2)     | 1,759      |
|                     | VASTY2     |            |
|                     | VASTY2(1)  | 4,870      |
|                     | VASTY2(2)  | 6,105      |
|                     | VASTY2(3)  | 1,425      |
|                     | VASTY2(4)  | 4,316      |
|                     | VASTY2(5)  | 2,579      |
|                     | VASTY2(6)  | .          |
|                     | VASTY2(7)  | 5,880      |
|                     | VASTY2(8)  | 4,019      |
|                     | VASTY2(9)  | 3,803      |
|                     | VASTY2(10) | 11,786     |
|                     | VASTY2(11) | 11,365     |
|                     | VASTY2(12) | 2,294      |
|                     | VASTY2(13) | 2,913      |
|                     | VASTY2(14) | 3,587      |
|                     | VASTY2(15) | 3,654      |
|                     | VASTY2(16) | 5,084      |
|                     | VASTY2(17) | .          |
|                     | VASTY2(18) | .          |
|                     | VASTY2(19) | 2,110      |
|                     | VASTY2(20) | 2,803      |
|                     | VASTY2(21) | 2,374      |
|                     | VASTY2(22) | 6,278      |
|                     | VASTY2(23) | 13,690     |
|                     | VASTY2(24) | 9,316      |
|                     | VASTY2(25) | 5,771      |
|                     | VASTY2(26) | 3,451      |
|                     | VASTY2(27) | 1,510      |
|                     | VASTY2(28) | 2,381      |
|                     | VASTY2(29) | .          |
|                     | VASTY2(30) | 4,691      |
|                     | VASTY2(31) | 8,336      |
|                     | VASTY2(32) | 3,652      |
|                     | VASTY2(33) | 3,057      |
|                     | VASTY2(34) | 1,646      |
|                     | VASTY2(35) | 7,745      |
|                     | Constant   |            |

a. Variable(s) entered on step 1: bv2, VASTY2.



**Block 1: Method = Enter****Omnibus Tests of Model Coefficients**

|        |       | Chi-square | df | Sig. |
|--------|-------|------------|----|------|
| Step 1 | Step  | 212,717    | 37 | ,000 |
|        | Block | 212,717    | 37 | ,000 |
|        | Model | 212,717    | 37 | ,000 |

**Model Summary**

| Step | -2 Log likelihood    | Cox & Snell R Square | Nagelkerke R Square |
|------|----------------------|----------------------|---------------------|
| 1    | 2206,07 <sup>a</sup> | ,017                 | ,096                |

a. Estimation terminated at iteration number 20 because maximum iterations has been reached. Final solution cannot be found.

**Classification Table<sup>a</sup>**

|                    |                                |                           | Predicted                      |                      |
|--------------------|--------------------------------|---------------------------|--------------------------------|----------------------|
|                    |                                |                           | handlt1 händelse larger than 1 |                      |
| Observed           |                                |                           | 0 ingen eller en händelse      | 1 mer än en händelse |
| Step 1             | handlt1 händelse larger than 1 | 0 ingen eller en händelse | 12229                          | 0                    |
|                    |                                | 1 mer än en händelse      | 246                            | 0                    |
| Overall Percentage |                                |                           |                                |                      |

**Classification Table<sup>a</sup>**

|                    |                                |                           | Predicted          |
|--------------------|--------------------------------|---------------------------|--------------------|
|                    |                                |                           | Percentage Correct |
| Step 1             | handlt1 händelse larger than 1 | 0 ingen eller en händelse | 100,0              |
|                    |                                | 1 mer än en händelse      | ,0                 |
| Overall Percentage |                                |                           | 98,0               |

a. The cut value is ,500

## Variables in the Equation

|                     |            | B       | S.E.     | Wald    | df | Sig. | Exp(B) | 95% C.I. |
|---------------------|------------|---------|----------|---------|----|------|--------|----------|
|                     |            |         |          |         |    |      |        | Lower    |
| Step 1 <sup>a</sup> | bv3        |         |          | 3,508   | 2  | ,173 |        |          |
|                     | bv3(1)     | -,484   | ,259     | 3,492   | 1  | ,062 | ,616   | ,371     |
|                     | bv3(2)     | -,018   | ,194     | ,009    | 1  | ,926 | ,982   | ,672     |
|                     | VASTY2     |         |          | 118,219 | 35 | ,000 |        |          |
|                     | VASTY2(1)  | ,522    | ,575     | ,825    | 1  | ,364 | 1,686  | ,546     |
|                     | VASTY2(2)  | ,795    | ,545     | 2,131   | 1  | ,144 | 2,214  | ,762     |
|                     | VASTY2(3)  | -1,646  | 1,100    | 2,238   | 1  | ,135 | ,193   | ,022     |
|                     | VASTY2(4)  | ,461    | ,578     | ,637    | 1  | ,425 | 1,585  | ,511     |
|                     | VASTY2(5)  | -,412   | ,735     | ,314    | 1  | ,575 | ,663   | ,157     |
|                     | VASTY2(6)  | -16,921 | 2104,931 | ,000    | 1  | ,994 | ,000   | ,000     |
|                     | VASTY2(7)  | ,894    | ,548     | 2,666   | 1  | ,103 | 2,445  | ,836     |
|                     | VASTY2(8)  | ,329    | ,591     | ,310    | 1  | ,578 | 1,389  | ,437     |
|                     | VASTY2(9)  | ,249    | ,611     | ,166    | 1  | ,684 | 1,283  | ,387     |
|                     | VASTY2(10) | 1,554   | ,499     | 9,677   | 1  | ,002 | 4,728  | 1,777    |
|                     | VASTY2(11) | 1,499   | ,504     | 8,860   | 1  | ,003 | 4,479  | 1,669    |
|                     | VASTY2(12) | -,535   | ,734     | ,531    | 1  | ,466 | ,586   | ,139     |
|                     | VASTY2(13) | -,027   | ,638     | ,002    | 1  | ,966 | ,973   | ,279     |
|                     | VASTY2(14) | ,182    | ,611     | ,089    | 1  | ,766 | 1,200  | ,362     |
|                     | VASTY2(15) | ,179    | ,610     | ,086    | 1  | ,770 | 1,196  | ,362     |
|                     | VASTY2(16) | ,265    | ,738     | ,129    | 1  | ,720 | 1,303  | ,306     |
|                     | VASTY2(17) | -16,892 | 2100,571 | ,000    | 1  | ,994 | ,000   | ,000     |
|                     | VASTY2(18) | -16,886 | 2109,059 | ,000    | 1  | ,994 | ,000   | ,000     |
|                     | VASTY2(19) | -1,345  | 1,107    | 1,477   | 1  | ,224 | ,261   | ,030     |
|                     | VASTY2(20) | -,297   | ,736     | ,162    | 1  | ,687 | ,743   | ,176     |
|                     | VASTY2(21) | -,520   | ,734     | ,501    | 1  | ,479 | ,595   | ,141     |
|                     | VASTY2(22) | ,645    | ,563     | 1,311   | 1  | ,252 | 1,906  | ,632     |
|                     | VASTY2(23) | 1,655   | ,498     | 11,062  | 1  | ,001 | 5,235  | 1,974    |
|                     | VASTY2(24) | 1,350   | ,511     | 6,982   | 1  | ,008 | 3,856  | 1,417    |
|                     | VASTY2(25) | ,615    | ,591     | 1,083   | 1  | ,298 | 1,850  | ,581     |
|                     | VASTY2(26) | ,016    | ,676     | ,001    | 1  | ,981 | 1,016  | ,270     |
|                     | VASTY2(27) | -1,612  | 1,099    | 2,154   | 1  | ,142 | ,199   | ,023     |
|                     | VASTY2(28) | -1,165  | 1,099    | 1,124   | 1  | ,289 | ,312   | ,036     |
|                     | VASTY2(29) | -16,951 | 2100,489 | ,000    | 1  | ,994 | ,000   | ,000     |
|                     | VASTY2(30) | ,453    | ,575     | ,621    | 1  | ,431 | 1,574  | ,510     |
|                     | VASTY2(31) | 1,211   | ,526     | 5,307   | 1  | ,021 | 3,356  | 1,198    |
|                     | VASTY2(32) | ,137    | ,640     | ,046    | 1  | ,831 | 1,147  | ,327     |
|                     | VASTY2(33) | -,125   | ,677     | ,034    | 1  | ,853 | ,882   | ,234     |
|                     | VASTY2(34) | -1,622  | 1,098    | 2,183   | 1  | ,140 | ,197   | ,023     |
|                     | VASTY2(35) | 1,141   | ,537     | 4,512   | 1  | ,034 | 3,131  | 1,092    |
|                     | Constant   | -4,243  | ,451     | 88,672  | 1  | ,000 | ,014   |          |

## Variables in the Equation

|                     |            | 95% C.I... |
|---------------------|------------|------------|
|                     |            | Upper      |
| Step 1 <sup>a</sup> | bv3        |            |
|                     | bv3(1)     | 1,024      |
|                     | bv3(2)     | 1,436      |
|                     | VASTY2     |            |
|                     | VASTY2(1)  | 5,207      |
|                     | VASTY2(2)  | 6,439      |
|                     | VASTY2(3)  | 1,666      |
|                     | VASTY2(4)  | 4,918      |
|                     | VASTY2(5)  | 2,797      |
|                     | VASTY2(6)  | .          |
|                     | VASTY2(7)  | 7,153      |
|                     | VASTY2(8)  | 4,421      |
|                     | VASTY2(9)  | 4,248      |
|                     | VASTY2(10) | 12,583     |
|                     | VASTY2(11) | 12,023     |
|                     | VASTY2(12) | 2,469      |
|                     | VASTY2(13) | 3,398      |
|                     | VASTY2(14) | 3,971      |
|                     | VASTY2(15) | 3,955      |
|                     | VASTY2(16) | 5,541      |
|                     | VASTY2(17) | .          |
|                     | VASTY2(18) | .          |
|                     | VASTY2(19) | 2,280      |
|                     | VASTY2(20) | 3,148      |
|                     | VASTY2(21) | 2,508      |
|                     | VASTY2(22) | 5,747      |
|                     | VASTY2(23) | 13,886     |
|                     | VASTY2(24) | 10,493     |
|                     | VASTY2(25) | 5,896      |
|                     | VASTY2(26) | 3,824      |
|                     | VASTY2(27) | 1,717      |
|                     | VASTY2(28) | 2,688      |
|                     | VASTY2(29) | .          |
|                     | VASTY2(30) | 4,860      |
|                     | VASTY2(31) | 9,399      |
|                     | VASTY2(32) | 4,022      |
|                     | VASTY2(33) | 3,323      |
|                     | VASTY2(34) | 1,698      |
|                     | VASTY2(35) | 8,976      |
|                     | Constant   |            |

a. Variable(s) entered on step 1: bv3, VASTY2.

```

1
2
3
4
5
6
7 LOGISTIC REGRESSION VARIABLES handlt1
8   /METHOD=ENTER sv3 VASTY2
9   /CONTRAST (sv3)=Indicator(1)
10  /CONTRAST (VASTY2)=Indicator(1)
11  /PRINT=CI(95)
12
13  /CRITERIA=PIN(0.05) POUT(0.10) ITERATE(20) CUT(0.5).
14
15

```

## Block 1: Method = Enter

### Omnibus Tests of Model Coefficients

|        |       | Chi-square | df | Sig. |
|--------|-------|------------|----|------|
| Step 1 | Step  | 210,059    | 37 | ,000 |
|        | Block | 210,059    | 37 | ,000 |
|        | Model | 210,059    | 37 | ,000 |

### Model Summary

| Step | -2 Log likelihood    | Cox & Snell R Square | Nagelkerke R Square |
|------|----------------------|----------------------|---------------------|
| 1    | 2208,72 <sup>a</sup> | ,017                 | ,095                |

a. Estimation terminated at iteration number 20 because maximum iterations has been reached. Final solution cannot be found.

### Classification Table<sup>a</sup>

|                    |                                |                           | Predicted                      |                      |
|--------------------|--------------------------------|---------------------------|--------------------------------|----------------------|
|                    |                                |                           | handlt1 händelse larger than 1 |                      |
| Observed           |                                |                           | 0 ingen eller en händelse      | 1 mer än en händelse |
| Step 1             | handlt1 händelse larger than 1 | 0 ingen eller en händelse | 12229                          | 0                    |
|                    |                                | 1 mer än en händelse      | 246                            | 0                    |
| Overall Percentage |                                |                           |                                |                      |

Classification Table<sup>a</sup>

| Observed           |                                | Predicted                 |                      |
|--------------------|--------------------------------|---------------------------|----------------------|
|                    |                                | 0 ingen eller en händelse | 1 mer än en händelse |
| Step 1             | handlt1 händelse larger than 1 | 100,0                     | ,0                   |
| Overall Percentage |                                | 98,0                      |                      |

a. The cut value is ,500

Variables in the Equation

|                     |            | B       | S.E.     | Wald    | df | Sig. | Exp(B) | 95% C.I. |
|---------------------|------------|---------|----------|---------|----|------|--------|----------|
|                     |            |         |          |         |    |      |        | Lower    |
| Step 1 <sup>a</sup> | sv3        |         |          | 1,277   | 2  | ,528 |        |          |
|                     | sv3(1)     | -,040   | ,181     | ,049    | 1  | ,824 | ,961   | ,674     |
|                     | sv3(2)     | ,163    | ,179     | ,825    | 1  | ,364 | 1,177  | ,828     |
|                     | VASTY2     |         |          | 118,011 | 35 | ,000 |        |          |
|                     | VASTY2(1)  | ,445    | ,577     | ,597    | 1  | ,440 | 1,561  | ,504     |
|                     | VASTY2(2)  | ,717    | ,550     | 1,696   | 1  | ,193 | 2,048  | ,696     |
|                     | VASTY2(3)  | -1,597  | 1,098    | 2,114   | 1  | ,146 | ,203   | ,024     |
|                     | VASTY2(4)  | ,490    | ,576     | ,724    | 1  | ,395 | 1,632  | ,528     |
|                     | VASTY2(5)  | -,367   | ,737     | ,248    | 1  | ,618 | ,693   | ,164     |
|                     | VASTY2(6)  | -17,038 | 2106,305 | ,000    | 1  | ,994 | ,000   | ,000     |
|                     | VASTY2(7)  | ,923    | ,538     | 2,942   | 1  | ,086 | 2,516  | ,877     |
|                     | VASTY2(8)  | ,383    | ,592     | ,419    | 1  | ,518 | 1,466  | ,460     |
|                     | VASTY2(9)  | ,251    | ,610     | ,170    | 1  | ,680 | 1,286  | ,389     |
|                     | VASTY2(10) | 1,472   | ,508     | 8,390   | 1  | ,004 | 4,356  | 1,609    |
|                     | VASTY2(11) | 1,482   | ,503     | 8,661   | 1  | ,003 | 4,400  | 1,640    |
|                     | VASTY2(12) | -,601   | ,738     | ,663    | 1  | ,415 | ,548   | ,129     |
|                     | VASTY2(13) | -,112   | ,645     | ,030    | 1  | ,862 | ,894   | ,253     |
|                     | VASTY2(14) | ,121    | ,613     | ,039    | 1  | ,843 | 1,129  | ,340     |
|                     | VASTY2(15) | ,094    | ,616     | ,023    | 1  | ,878 | 1,099  | ,329     |
|                     | VASTY2(16) | ,193    | ,737     | ,068    | 1  | ,794 | 1,212  | ,286     |
|                     | VASTY2(17) | -16,906 | 2103,049 | ,000    | 1  | ,994 | ,000   | ,000     |
|                     | VASTY2(18) | -16,854 | 2112,495 | ,000    | 1  | ,994 | ,000   | ,000     |
|                     | VASTY2(19) | -1,548  | 1,105    | 1,964   | 1  | ,161 | ,213   | ,024     |
|                     | VASTY2(20) | -,372   | ,737     | ,255    | 1  | ,614 | ,690   | ,163     |
|                     | VASTY2(21) | -,489   | ,735     | ,443    | 1  | ,506 | ,613   | ,145     |
|                     | VASTY2(22) | ,596    | ,563     | 1,122   | 1  | ,289 | 1,815  | ,602     |
|                     | VASTY2(23) | 1,637   | ,498     | 10,821  | 1  | ,001 | 5,142  | 1,938    |
|                     | VASTY2(24) | 1,334   | ,509     | 6,853   | 1  | ,009 | 3,795  | 1,398    |
|                     | VASTY2(25) | ,613    | ,592     | 1,071   | 1  | ,301 | 1,846  | ,578     |

## Variables in the Equation

|                     |            | 95% C.I... |
|---------------------|------------|------------|
|                     |            | Upper      |
| Step 1 <sup>a</sup> | sv3        |            |
|                     | sv3(1)     | 1,369      |
|                     | sv3(2)     | 1,671      |
|                     | VASTY2     |            |
|                     | VASTY2(1)  | 4,833      |
|                     | VASTY2(2)  | 6,021      |
|                     | VASTY2(3)  | 1,743      |
|                     | VASTY2(4)  | 5,041      |
|                     | VASTY2(5)  | 2,936      |
|                     | VASTY2(6)  | .          |
|                     | VASTY2(7)  | 7,223      |
|                     | VASTY2(8)  | 4,676      |
|                     | VASTY2(9)  | 4,253      |
|                     | VASTY2(10) | 11,791     |
|                     | VASTY2(11) | 11,803     |
|                     | VASTY2(12) | 2,329      |
|                     | VASTY2(13) | 3,162      |
|                     | VASTY2(14) | 3,753      |
|                     | VASTY2(15) | 3,672      |
|                     | VASTY2(16) | 5,143      |
|                     | VASTY2(17) | .          |
|                     | VASTY2(18) | .          |
|                     | VASTY2(19) | 1,853      |
|                     | VASTY2(20) | 2,922      |
|                     | VASTY2(21) | 2,588      |
|                     | VASTY2(22) | 5,471      |
|                     | VASTY2(23) | 13,641     |
|                     | VASTY2(24) | 10,300     |
|                     | VASTY2(25) | 5,896      |

Variables in the Equation

|            | B       | S.E.     | Wald   | df | Sig. | Exp(B) | 95% C.I. |
|------------|---------|----------|--------|----|------|--------|----------|
|            |         |          |        |    |      |        | Lower    |
| VASTY2(26) | -,011   | ,676     | ,000   | 1  | ,987 | ,989   | ,263     |
| VASTY2(27) | -1,698  | 1,100    | 2,381  | 1  | ,123 | ,183   | ,021     |
| VASTY2(28) | -1,261  | 1,105    | 1,304  | 1  | ,254 | ,283   | ,033     |
| VASTY2(29) | -17,056 | 2100,912 | ,000   | 1  | ,994 | ,000   | ,000     |
| VASTY2(30) | ,511    | ,577     | ,784   | 1  | ,376 | 1,666  | ,538     |
| VASTY2(31) | 1,190   | ,532     | 4,999  | 1  | ,025 | 3,288  | 1,158    |
| VASTY2(32) | ,086    | ,648     | ,018   | 1  | ,894 | 1,090  | ,306     |
| VASTY2(33) | -,148   | ,686     | ,047   | 1  | ,829 | ,862   | ,225     |
| VASTY2(34) | -1,618  | 1,098    | 2,171  | 1  | ,141 | ,198   | ,023     |
| VASTY2(35) | 1,108   | ,533     | 4,319  | 1  | ,038 | 3,028  | 1,065    |
| Constant   | -4,309  | ,458     | 88,559 | 1  | ,000 | ,013   |          |

Variables in the Equation

|            | 95% C.I. |
|------------|----------|
|            | Upper    |
| VASTY2(26) | 3,718    |
| VASTY2(27) | 1,582    |
| VASTY2(28) | 2,469    |
| VASTY2(29) | .        |
| VASTY2(30) | 5,161    |
| VASTY2(31) | 9,335    |
| VASTY2(32) | 3,884    |
| VASTY2(33) | 3,307    |
| VASTY2(34) | 1,706    |
| VASTY2(35) | 8,610    |
| Constant   |          |

a. Variable(s) entered on step 1: sv3, VASTY2.

```
LOGISTIC REGRESSION VARIABLES handlt1
/METHOD=ENTER sv5 VASTY2
/CONTRAST (sv5)=Indicator(1)
/CONTRAST (VASTY2)=Indicator(1)
/PRINT=CI(95)
/CRITERIA=PIN(0.05) POUT(0.10) ITERATE(20) CUT(0.5).
```

**Block 1: Method = Enter**

**Omnibus Tests of Model Coefficients**

|        |       | Chi-square | df | Sig. |
|--------|-------|------------|----|------|
| Step 1 | Step  | 212,136    | 39 | ,000 |
|        | Block | 212,136    | 39 | ,000 |
|        | Model | 212,136    | 39 | ,000 |

**Model Summary**

| Step | -2 Log likelihood    | Cox & Snell R Square | Nagelkerke R Square |
|------|----------------------|----------------------|---------------------|
| 1    | 2206,65 <sup>a</sup> | ,017                 | ,096                |

a. Estimation terminated at iteration number 20 because maximum iterations has been reached. Final solution cannot be found.

**Classification Table<sup>a</sup>**

| Observed           |                                |                           | Predicted                      |                           |
|--------------------|--------------------------------|---------------------------|--------------------------------|---------------------------|
|                    |                                |                           | handlt1 händelse larger than 1 | 0 ingen eller en händelse |
| Step 1             | handlt1 händelse larger than 1 | 0 ingen eller en händelse | 12229                          | 0                         |
|                    |                                | 1 mer än en händelse      | 246                            | 0                         |
| Overall Percentage |                                |                           |                                |                           |

**Classification Table<sup>a</sup>**

| Observed           |                                |                           | Predicted          |
|--------------------|--------------------------------|---------------------------|--------------------|
|                    |                                |                           | Percentage Correct |
| Step 1             | handlt1 händelse larger than 1 | 0 ingen eller en händelse | 100,0              |
|                    |                                | 1 mer än en händelse      | ,0                 |
| Overall Percentage |                                |                           | 98,0               |

a. The cut value is ,500



Variables in the Equation

|                     | B       | S.E.     | Wald    | df | Sig. | Exp(B) | 95% C.I. |       |
|---------------------|---------|----------|---------|----|------|--------|----------|-------|
|                     |         |          |         |    |      |        | Lower    | Upper |
| Step 1 <sup>a</sup> |         |          | 3,394   | 4  | ,494 |        |          |       |
| sv5                 |         |          |         |    |      |        |          |       |
| sv5(1)              | -,117   | ,229     | ,259    | 1  | ,611 | ,890   | ,568     |       |
| sv5(2)              | ,028    | ,230     | ,014    | 1  | ,904 | 1,028  | ,655     |       |
| sv5(3)              | -,035   | ,217     | ,026    | 1  | ,871 | ,965   | ,631     |       |
| sv5(4)              | ,294    | ,234     | 1,585   | 1  | ,208 | 1,342  | ,849     |       |
| VASTY2              |         |          | 118,179 | 35 | ,000 |        |          |       |
| VASTY2(1)           | ,429    | ,577     | ,552    | 1  | ,458 | 1,535  | ,495     |       |
| VASTY2(2)           | ,638    | ,555     | 1,321   | 1  | ,250 | 1,893  | ,638     |       |
| VASTY2(3)           | -1,608  | 1,098    | 2,144   | 1  | ,143 | ,200   | ,023     |       |
| VASTY2(4)           | ,492    | ,576     | ,730    | 1  | ,393 | 1,635  | ,529     |       |
| VASTY2(5)           | -,380   | ,737     | ,266    | 1  | ,606 | ,684   | ,161     |       |
| VASTY2(6)           | -17,166 | 2104,809 | ,000    | 1  | ,993 | ,000   | ,000     |       |
| VASTY2(7)           | ,930    | ,538     | 2,987   | 1  | ,084 | 2,534  | ,883     |       |
| VASTY2(8)           | ,360    | ,592     | ,371    | 1  | ,543 | 1,434  | ,449     |       |
| VASTY2(9)           | ,260    | ,610     | ,181    | 1  | ,670 | 1,297  | ,392     |       |
| VASTY2(10)          | 1,379   | ,515     | 7,181   | 1  | ,007 | 3,972  | 1,448    |       |
| VASTY2(11)          | 1,476   | ,504     | 8,586   | 1  | ,003 | 4,373  | 1,630    |       |
| VASTY2(12)          | -,646   | ,740     | ,764    | 1  | ,382 | ,524   | ,123     |       |
| VASTY2(13)          | -,206   | ,650     | ,100    | 1  | ,752 | ,814   | ,228     |       |
| VASTY2(14)          | ,071    | ,615     | ,013    | 1  | ,909 | 1,073  | ,321     |       |
| VASTY2(15)          | ,027    | ,619     | ,002    | 1  | ,965 | 1,027  | ,305     |       |
| VASTY2(16)          | ,147    | ,739     | ,039    | 1  | ,843 | 1,158  | ,272     |       |
| VASTY2(17)          | -16,914 | 2102,229 | ,000    | 1  | ,994 | ,000   | ,000     |       |
| VASTY2(18)          | -16,815 | 2112,424 | ,000    | 1  | ,994 | ,000   | ,000     |       |
| VASTY2(19)          | -1,505  | 1,110    | 1,839   | 1  | ,175 | ,222   | ,025     |       |
| VASTY2(20)          | -,442   | ,740     | ,356    | 1  | ,551 | ,643   | ,151     |       |
| VASTY2(21)          | -,490   | ,735     | ,444    | 1  | ,505 | ,613   | ,145     |       |
| VASTY2(22)          | ,591    | ,563     | 1,103   | 1  | ,294 | 1,806  | ,599     |       |
| VASTY2(23)          | 1,633   | ,498     | 10,759  | 1  | ,001 | 5,121  | 1,930    |       |
| VASTY2(24)          | 1,300   | ,511     | 6,486   | 1  | ,011 | 3,670  | 1,349    |       |
| VASTY2(25)          | ,595    | ,593     | 1,007   | 1  | ,316 | 1,813  | ,567     |       |
| VASTY2(26)          | -,016   | ,676     | ,001    | 1  | ,981 | ,984   | ,261     |       |
| VASTY2(27)          | -1,759  | 1,102    | 2,549   | 1  | ,110 | ,172   | ,020     |       |
| VASTY2(28)          | -1,415  | 1,111    | 1,620   | 1  | ,203 | ,243   | ,028     |       |
| VASTY2(29)          | -17,217 | 2100,737 | ,000    | 1  | ,993 | ,000   | ,000     |       |
| VASTY2(30)          | ,503    | ,577     | ,759    | 1  | ,384 | 1,653  | ,534     |       |
| VASTY2(31)          | 1,212   | ,537     | 5,089   | 1  | ,024 | 3,360  | 1,172    |       |
| VASTY2(32)          | ,125    | ,656     | ,036    | 1  | ,849 | 1,133  | ,313     |       |
| VASTY2(33)          | -,105   | ,694     | ,023    | 1  | ,880 | ,900   | ,231     |       |
| VASTY2(34)          | -1,625  | 1,098    | 2,190   | 1  | ,139 | ,197   | ,023     |       |
| VASTY2(35)          | 1,117   | ,534     | 4,375   | 1  | ,036 | 3,054  | 1,073    |       |
| Constant            | -4,276  | ,469     | 83,025  | 1  | ,000 | ,014   |          |       |

## Variables in the Equation

|                     |            | 95% C.I... |
|---------------------|------------|------------|
|                     |            | Upper      |
| Step 1 <sup>a</sup> | sv5        |            |
|                     | sv5(1)     | 1,394      |
|                     | sv5(2)     | 1,613      |
|                     | sv5(3)     | 1,477      |
|                     | sv5(4)     | 2,123      |
|                     | VASTY2     |            |
|                     | VASTY2(1)  | 4,757      |
|                     | VASTY2(2)  | 5,622      |
|                     | VASTY2(3)  | 1,724      |
|                     | VASTY2(4)  | 5,052      |
|                     | VASTY2(5)  | 2,898      |
|                     | VASTY2(6)  | .          |
|                     | VASTY2(7)  | 7,273      |
|                     | VASTY2(8)  | 4,577      |
|                     | VASTY2(9)  | 4,290      |
|                     | VASTY2(10) | 10,893     |
|                     | VASTY2(11) | 11,734     |
|                     | VASTY2(12) | 2,233      |
|                     | VASTY2(13) | 2,912      |
|                     | VASTY2(14) | 3,584      |
|                     | VASTY2(15) | 3,456      |
|                     | VASTY2(16) | 4,932      |
|                     | VASTY2(17) | .          |
|                     | VASTY2(18) | .          |
|                     | VASTY2(19) | 1,955      |
|                     | VASTY2(20) | 2,741      |
|                     | VASTY2(21) | 2,587      |
|                     | VASTY2(22) | 5,444      |
|                     | VASTY2(23) | 13,590     |
|                     | VASTY2(24) | 9,982      |
|                     | VASTY2(25) | 5,794      |
|                     | VASTY2(26) | 3,701      |
|                     | VASTY2(27) | 1,493      |
|                     | VASTY2(28) | 2,146      |
|                     | VASTY2(29) | .          |
|                     | VASTY2(30) | 5,123      |
|                     | VASTY2(31) | 9,627      |
|                     | VASTY2(32) | 4,095      |
|                     | VASTY2(33) | 3,510      |
|                     | VASTY2(34) | 1,694      |
|                     | VASTY2(35) | 8,696      |
|                     | Constant   |            |

a. Variable(s) entered on step 1: sv5, VASTY2.

```
LOGISTIC REGRESSION VARIABLES handlt1
/METHOD=ENTER sv7 VASTY2
/CONTRAST (sv7)=Indicator(1)
/CONTRAST (VASTY2)=Indicator(1)
/PRINT=CI(95)
/CRITERIA=PIN(0.05) POUT(0.10) ITERATE(20) CUT(0.5).
```

## Block 1: Method = Enter

### Omnibus Tests of Model Coefficients

|        |       | Chi-square | df | Sig. |
|--------|-------|------------|----|------|
| Step 1 | Step  | 219,500    | 41 | ,000 |
|        | Block | 219,500    | 41 | ,000 |
|        | Model | 219,500    | 41 | ,000 |

### Model Summary

| Step | -2 Log likelihood    | Cox & Snell R Square | Nagelkerke R Square |
|------|----------------------|----------------------|---------------------|
| 1    | 2199,28 <sup>a</sup> | ,017                 | ,099                |

a. Estimation terminated at iteration number 20 because maximum iterations has been reached. Final solution cannot be found.

Classification Table<sup>a</sup>

|                    |                                |       | Predicted                 |                      |
|--------------------|--------------------------------|-------|---------------------------|----------------------|
|                    |                                |       | 0 ingen eller en händelse | 1 mer än en händelse |
| Observed           | handlt1 händelse larger than 1 | 12229 | 0                         |                      |
|                    | 0 ingen eller en händelse      | 246   | 0                         |                      |
| Overall Percentage |                                |       |                           |                      |

Classification Table<sup>a</sup>

|                    |                                |                           | Predicted          |
|--------------------|--------------------------------|---------------------------|--------------------|
|                    |                                |                           |                    |
| Observed           |                                |                           | Percentage Correct |
| Step 1             | handlt1 händelse larger than 1 | 0 ingen eller en händelse | 100,0              |
|                    |                                | 1 mer än en händelse      | ,0                 |
| Overall Percentage |                                |                           | 98,0               |

a. The cut value is ,500

Variables in the Equation

|                     |            | B       | S.E.     | Wald    | df | Sig. | Exp(B) | 95% C.I.<br>Lower |
|---------------------|------------|---------|----------|---------|----|------|--------|-------------------|
| Step 1 <sup>a</sup> | sv7        |         |          | 11,121  | 6  | ,085 |        |                   |
|                     | sv7(1)     | -,095   | ,265     | ,130    | 1  | ,719 | ,909   | ,541              |
|                     | sv7(2)     | ,002    | ,281     | ,000    | 1  | ,995 | 1,002  | ,577              |
|                     | sv7(3)     | ,059    | ,271     | ,048    | 1  | ,827 | 1,061  | ,623              |
|                     | sv7(4)     | -,039   | ,269     | ,021    | 1  | ,886 | ,962   | ,568              |
|                     | sv7(5)     | ,193    | ,247     | ,607    | 1  | ,436 | 1,213  | ,747              |
|                     | sv7(6)     | ,725    | ,278     | 6,787   | 1  | ,009 | 2,065  | 1,197             |
|                     | VASTY2     |         |          | 120,926 | 35 | ,000 |        |                   |
|                     | VASTY2(1)  | ,364    | ,578     | ,396    | 1  | ,529 | 1,439  | ,464              |
|                     | VASTY2(2)  | ,454    | ,559     | ,660    | 1  | ,417 | 1,575  | ,527              |
|                     | VASTY2(3)  | -1,603  | 1,098    | 2,131   | 1  | ,144 | ,201   | ,023              |
|                     | VASTY2(4)  | ,468    | ,576     | ,659    | 1  | ,417 | 1,596  | ,516              |
|                     | VASTY2(5)  | -,371   | ,737     | ,253    | 1  | ,615 | ,690   | ,163              |
|                     | VASTY2(6)  | -17,485 | 2098,395 | ,000    | 1  | ,993 | ,000   | ,000              |
|                     | VASTY2(7)  | ,922    | ,538     | 2,936   | 1  | ,087 | 2,514  | ,876              |
|                     | VASTY2(8)  | ,367    | ,593     | ,385    | 1  | ,535 | 1,444  | ,452              |
|                     | VASTY2(9)  | ,251    | ,611     | ,168    | 1  | ,681 | 1,285  | ,388              |
|                     | VASTY2(10) | 1,167   | ,519     | 5,065   | 1  | ,024 | 3,213  | 1,163             |
|                     | VASTY2(11) | 1,466   | ,504     | 8,452   | 1  | ,004 | 4,331  | 1,612             |
|                     | VASTY2(12) | -,768   | ,741     | 1,074   | 1  | ,300 | ,464   | ,109              |
|                     | VASTY2(13) | -,435   | ,654     | ,442    | 1  | ,506 | ,647   | ,180              |
|                     | VASTY2(14) | -,061   | ,617     | ,010    | 1  | ,921 | ,941   | ,281              |
|                     | VASTY2(15) | -,163   | ,623     | ,069    | 1  | ,793 | ,849   | ,251              |
|                     | VASTY2(16) | -,008   | ,743     | ,000    | 1  | ,991 | ,992   | ,231              |
|                     | VASTY2(17) | -16,945 | 2098,533 | ,000    | 1  | ,994 | ,000   | ,000              |
|                     | VASTY2(18) | -16,806 | 2112,381 | ,000    | 1  | ,994 | ,000   | ,000              |
|                     | VASTY2(19) | -1,493  | 1,114    | 1,798   | 1  | ,180 | ,225   | ,025              |
|                     | VASTY2(20) | -,619   | ,743     | ,694    | 1  | ,405 | ,538   | ,125              |
|                     | VASTY2(21) | -,502   | ,735     | ,467    | 1  | ,494 | ,605   | ,143              |

## Variables in the Equation

|                     |            | 95% C.I... |
|---------------------|------------|------------|
|                     |            | Upper      |
| Step 1 <sup>a</sup> | sv7        |            |
|                     | sv7(1)     | 1,527      |
|                     | sv7(2)     | 1,739      |
|                     | sv7(3)     | 1,806      |
|                     | sv7(4)     | 1,630      |
|                     | sv7(5)     | 1,969      |
|                     | sv7(6)     | 3,563      |
|                     | VASTY2     |            |
|                     | VASTY2(1)  | 4,467      |
|                     | VASTY2(2)  | 4,707      |
|                     | VASTY2(3)  | 1,732      |
|                     | VASTY2(4)  | 4,936      |
|                     | VASTY2(5)  | 2,926      |
|                     | VASTY2(6)  | .          |
|                     | VASTY2(7)  | 7,217      |
|                     | VASTY2(8)  | 4,613      |
|                     | VASTY2(9)  | 4,252      |
|                     | VASTY2(10) | 8,882      |
|                     | VASTY2(11) | 11,633     |
|                     | VASTY2(12) | 1,982      |
|                     | VASTY2(13) | 2,332      |
|                     | VASTY2(14) | 3,154      |
|                     | VASTY2(15) | 2,878      |
|                     | VASTY2(16) | 4,251      |
|                     | VASTY2(17) | .          |
|                     | VASTY2(18) | .          |
|                     | VASTY2(19) | 1,992      |
|                     | VASTY2(20) | 2,311      |
|                     | VASTY2(21) | 2,555      |

Variables in the Equation

|            | B       | S.E.     | Wald   | df | Sig. | Exp(B) | 95% C.I. |
|------------|---------|----------|--------|----|------|--------|----------|
|            |         |          |        |    |      |        | Lower    |
| VASTY2(22) | ,587    | ,563     | 1,088  | 1  | ,297 | 1,799  | ,597     |
| VASTY2(23) | 1,633   | ,498     | 10,751 | 1  | ,001 | 5,120  | 1,929    |
| VASTY2(24) | 1,223   | ,512     | 5,712  | 1  | ,017 | 3,398  | 1,246    |
| VASTY2(25) | ,597    | ,593     | 1,013  | 1  | ,314 | 1,817  | ,568     |
| VASTY2(26) | -,060   | ,676     | ,008   | 1  | ,930 | ,942   | ,250     |
| VASTY2(27) | -1,952  | 1,104    | 3,123  | 1  | ,077 | ,142   | ,016     |
| VASTY2(28) | -1,788  | 1,117    | 2,561  | 1  | ,109 | ,167   | ,019     |
| VASTY2(29) | -17,601 | 2099,708 | ,000   | 1  | ,993 | ,000   | ,000     |
| VASTY2(30) | ,504    | ,577     | ,763   | 1  | ,383 | 1,655  | ,534     |
| VASTY2(31) | 1,211   | ,538     | 5,066  | 1  | ,024 | 3,357  | 1,169    |
| VASTY2(32) | ,134    | ,660     | ,041   | 1  | ,839 | 1,143  | ,314     |
| VASTY2(33) | -,093   | ,700     | ,018   | 1  | ,894 | ,911   | ,231     |
| VASTY2(34) | -1,645  | 1,098    | 2,243  | 1  | ,134 | ,193   | ,022     |
| VASTY2(35) | 1,051   | ,535     | 3,864  | 1  | ,049 | 2,861  | 1,003    |
| Constant   | -4,309  | ,480     | 80,714 | 1  | ,000 | ,013   |          |

Variables in the Equation

|            | 95% C.I. |
|------------|----------|
|            | Upper    |
| VASTY2(22) | 5,423    |
| VASTY2(23) | 13,591   |
| VASTY2(24) | 9,264    |
| VASTY2(25) | 5,808    |
| VASTY2(26) | 3,547    |
| VASTY2(27) | 1,237    |
| VASTY2(28) | 1,494    |
| VASTY2(29) | .        |
| VASTY2(30) | 5,131    |
| VASTY2(31) | 9,639    |
| VASTY2(32) | 4,170    |
| VASTY2(33) | 3,593    |
| VASTY2(34) | 1,661    |
| VASTY2(35) | 8,163    |
| Constant   |          |

a. Variable(s) entered on step 1: sv7, VASTY2.

\*\*

LOGISTIC REGRESSION VARIABLES dod01

```

1
2
3 /METHOD=ENTER bv1 VASTY2
4 /CONTRAST (bv1)=Indicator(1)
5 /CONTRAST (VASTY2)=Indicator(1)
6 /PRINT=CI(95)
7
8 /CRITERIA=PIN(0.05) POUT(0.10) ITERATE(20) CUT(0.5) .
9

```

## Block 1: Method = Enter

### Omnibus Tests of Model Coefficients

|        |       | Chi-square | df | Sig. |
|--------|-------|------------|----|------|
| Step 1 | Step  | 724,914    | 37 | ,000 |
|        | Block | 724,914    | 37 | ,000 |
|        | Model | 724,914    | 37 | ,000 |

### Model Summary

| Step | -2 Log likelihood    | Cox & Snell R Square | Nagelkerke R Square |
|------|----------------------|----------------------|---------------------|
| 1    | 4299,93 <sup>a</sup> | ,056                 | ,170                |

a. Estimation terminated at iteration number 20 because maximum iterations has been reached. Final solution cannot be found.

### Classification Table<sup>a</sup>

|                    |                             | Predicted                   |                      |                    |       |
|--------------------|-----------------------------|-----------------------------|----------------------|--------------------|-------|
|                    |                             | dod01 dödsfall ja eller nej |                      | Percentage Correct |       |
| Observed           |                             | 0 inget dödsfall            | 1 minst ett dödsfall |                    |       |
| Step 1             | dod01 dödsfall ja eller nej | 0 inget dödsfall            | 11839                | 0                  | 100,0 |
|                    |                             | 1 minst ett dödsfall        | 636                  | 0                  | ,0    |
| Overall Percentage |                             |                             |                      |                    | 94,9  |

a. The cut value is ,500

## Variables in the Equation

|                     |            | B       | S.E.     | Wald    | df | Sig. | Exp(B) | 95% C.I. |
|---------------------|------------|---------|----------|---------|----|------|--------|----------|
|                     |            |         |          |         |    |      |        | Lower    |
| Step 1 <sup>a</sup> | bv1        |         |          | 22,134  | 2  | ,000 |        |          |
|                     | bv1(1)     | -,257   | ,129     | 3,959   | 1  | ,047 | ,774   | ,601     |
|                     | bv1(2)     | ,342    | ,097     | 12,446  | 1  | ,000 | 1,407  | 1,164    |
|                     | VASTY2     |         |          | 211,297 | 35 | ,000 |        |          |
|                     | VASTY2(1)  | ,597    | ,343     | 3,036   | 1  | ,081 | 1,817  | ,928     |
|                     | VASTY2(2)  | ,710    | ,335     | 4,494   | 1  | ,034 | 2,034  | 1,055    |
|                     | VASTY2(3)  | ,618    | ,335     | 3,404   | 1  | ,065 | 1,855  | ,962     |
|                     | VASTY2(4)  | ,020    | ,371     | ,003    | 1  | ,957 | 1,020  | ,493     |
|                     | VASTY2(5)  | -,856   | ,495     | 2,997   | 1  | ,083 | ,425   | ,161     |
|                     | VASTY2(6)  | -18,130 | 2100,109 | ,000    | 1  | ,993 | ,000   | ,000     |
|                     | VASTY2(7)  | 1,454   | ,310     | 21,969  | 1  | ,000 | 4,282  | 2,331    |
|                     | VASTY2(8)  | ,736    | ,332     | 4,911   | 1  | ,027 | 2,087  | 1,089    |
|                     | VASTY2(9)  | ,262    | ,362     | ,525    | 1  | ,469 | 1,300  | ,639     |
|                     | VASTY2(10) | ,716    | ,334     | 4,606   | 1  | ,032 | 2,046  | 1,064    |
|                     | VASTY2(11) | ,318    | ,357     | ,791    | 1  | ,374 | 1,374  | ,682     |
|                     | VASTY2(12) | 1,216   | ,315     | 14,887  | 1  | ,000 | 3,373  | 1,819    |
|                     | VASTY2(13) | 1,356   | ,311     | 19,014  | 1  | ,000 | 3,880  | 2,110    |
|                     | VASTY2(14) | ,687    | ,334     | 4,234   | 1  | ,040 | 1,989  | 1,033    |
|                     | VASTY2(15) | ,122    | ,369     | ,109    | 1  | ,742 | 1,130  | ,547     |
|                     | VASTY2(16) | -,905   | ,644     | 1,974   | 1  | ,160 | ,405   | ,115     |
|                     | VASTY2(17) | -17,967 | 2097,899 | ,000    | 1  | ,993 | ,000   | ,000     |
|                     | VASTY2(18) | -2,701  | 1,038    | 6,771   | 1  | ,009 | ,067   | ,009     |
|                     | VASTY2(19) | -2,459  | 1,041    | 5,580   | 1  | ,018 | ,085   | ,011     |
|                     | VASTY2(20) | -1,506  | ,642     | 5,495   | 1  | ,019 | ,222   | ,063     |
|                     | VASTY2(21) | ,502    | ,345     | 2,112   | 1  | ,146 | 1,652  | ,839     |
|                     | VASTY2(22) | 1,238   | ,322     | 14,823  | 1  | ,000 | 3,450  | 1,837    |
|                     | VASTY2(23) | ,542    | ,348     | 2,429   | 1  | ,119 | 1,720  | ,870     |
|                     | VASTY2(24) | 1,296   | ,312     | 17,212  | 1  | ,000 | 3,654  | 1,981    |
|                     | VASTY2(25) | -,214   | ,435     | ,242    | 1  | ,623 | ,807   | ,344     |
|                     | VASTY2(26) | -18,081 | 2348,740 | ,000    | 1  | ,994 | ,000   | ,000     |
|                     | VASTY2(27) | -18,116 | 2094,245 | ,000    | 1  | ,993 | ,000   | ,000     |
|                     | VASTY2(28) | -18,130 | 2674,028 | ,000    | 1  | ,995 | ,000   | ,000     |
|                     | VASTY2(29) | -18,057 | 2095,696 | ,000    | 1  | ,993 | ,000   | ,000     |
|                     | VASTY2(30) | -,076   | ,386     | ,038    | 1  | ,845 | ,927   | ,435     |
|                     | VASTY2(31) | -18,034 | 2092,698 | ,000    | 1  | ,993 | ,000   | ,000     |
|                     | VASTY2(32) | -1,953  | ,760     | 6,595   | 1  | ,010 | ,142   | ,032     |
|                     | VASTY2(33) | -2,673  | 1,038    | 6,628   | 1  | ,010 | ,069   | ,009     |
|                     | VASTY2(34) | ,433    | ,351     | 1,526   | 1  | ,217 | 1,542  | ,776     |
|                     | VASTY2(35) | -18,165 | 2257,371 | ,000    | 1  | ,994 | ,000   | ,000     |
|                     | Constant   | -3,204  | ,275     | 135,335 | 1  | ,000 | ,041   |          |



Variables in the Equation

|                     |            | 95% C.I... |
|---------------------|------------|------------|
|                     |            | Upper      |
| Step 1 <sup>a</sup> | bv1        |            |
|                     | bv1(1)     | ,996       |
|                     | bv1(2)     | 1,701      |
|                     | VASTY2     |            |
|                     | VASTY2(1)  | 3,559      |
|                     | VASTY2(2)  | 3,920      |
|                     | VASTY2(3)  | 3,574      |
|                     | VASTY2(4)  | 2,113      |
|                     | VASTY2(5)  | 1,120      |
|                     | VASTY2(6)  | .          |
|                     | VASTY2(7)  | 7,867      |
|                     | VASTY2(8)  | 4,002      |
|                     | VASTY2(9)  | 2,643      |
|                     | VASTY2(10) | 3,933      |
|                     | VASTY2(11) | 2,768      |
|                     | VASTY2(12) | 6,256      |
|                     | VASTY2(13) | 7,138      |
|                     | VASTY2(14) | 3,828      |
|                     | VASTY2(15) | 2,330      |
|                     | VASTY2(16) | 1,429      |
|                     | VASTY2(17) | .          |
|                     | VASTY2(18) | ,513       |
|                     | VASTY2(19) | ,658       |
|                     | VASTY2(20) | ,781       |
|                     | VASTY2(21) | 3,251      |
|                     | VASTY2(22) | 6,481      |
|                     | VASTY2(23) | 3,400      |
|                     | VASTY2(24) | 6,739      |
|                     | VASTY2(25) | 1,894      |
|                     | VASTY2(26) | .          |
|                     | VASTY2(27) | .          |
|                     | VASTY2(28) | .          |
|                     | VASTY2(29) | .          |
|                     | VASTY2(30) | 1,976      |
|                     | VASTY2(31) | .          |
|                     | VASTY2(32) | ,630       |
|                     | VASTY2(33) | ,528       |
|                     | VASTY2(34) | 3,067      |
|                     | VASTY2(35) | .          |
|                     | Constant   |            |

a. Variable(s) entered on step 1: bv1, VASTY2.

LOGISTIC REGRESSION VARIABLES dod01  
 /METHOD=ENTER bv2 VASTY2  
 /CONTRAST (bv2)=Indicator(1)  
 /CONTRAST (VASTY2)=Indicator(1)  
 /PRINT=CI(95)  
 /CRITERIA=PIN(0.05) POUT(0.10) ITERATE(20) CUT(0.5).

## Block 1: Method = Enter

### Omnibus Tests of Model Coefficients

|        |       | Chi-square | df | Sig. |
|--------|-------|------------|----|------|
| Step 1 | Step  | 719,171    | 37 | ,000 |
|        | Block | 719,171    | 37 | ,000 |
|        | Model | 719,171    | 37 | ,000 |

### Model Summary

| Step | -2 Log likelihood    | Cox & Snell R Square | Nagelkerke R Square |
|------|----------------------|----------------------|---------------------|
| 1    | 4305,67 <sup>a</sup> | ,056                 | ,169                |

a. Estimation terminated at iteration number 20 because maximum iterations has been reached. Final solution cannot be found.

### Classification Table<sup>a</sup>

|                    |                             | Predicted                   |                      |                    |       |
|--------------------|-----------------------------|-----------------------------|----------------------|--------------------|-------|
|                    |                             | dod01 dödsfall ja eller nej |                      | Percentage Correct |       |
| Observed           |                             | 0 inget dödsfall            | 1 minst ett dödsfall |                    |       |
| Step 1             | dod01 dödsfall ja eller nej | 0 inget dödsfall            | 11839                | 0                  | 100,0 |
|                    |                             | 1 minst ett dödsfall        | 636                  | 0                  | ,0    |
| Overall Percentage |                             |                             |                      |                    | 94,9  |

a. The cut value is ,500

## Variables in the Equation

|                     |            | B       | S.E.     | Wald    | df | Sig. | Exp(B) | 95% C.I. |
|---------------------|------------|---------|----------|---------|----|------|--------|----------|
|                     |            |         |          |         |    |      |        | Lower    |
| Step 1 <sup>a</sup> | bv2        |         |          | 16,401  | 2  | ,000 |        |          |
|                     | bv2(1)     | -,135   | ,126     | 1,159   | 1  | ,282 | ,873   | ,683     |
|                     | bv2(2)     | ,293    | ,110     | 7,157   | 1  | ,007 | 1,341  | 1,082    |
|                     | VASTY2     |         |          | 216,449 | 35 | ,000 |        |          |
|                     | VASTY2(1)  | ,588    | ,343     | 2,943   | 1  | ,086 | 1,800  | ,920     |
|                     | VASTY2(2)  | ,713    | ,335     | 4,530   | 1  | ,033 | 2,040  | 1,058    |
|                     | VASTY2(3)  | ,667    | ,334     | 3,989   | 1  | ,046 | 1,948  | 1,012    |
|                     | VASTY2(4)  | ,057    | ,371     | ,023    | 1  | ,879 | 1,058  | ,512     |
|                     | VASTY2(5)  | -,846   | ,495     | 2,928   | 1  | ,087 | ,429   | ,163     |
|                     | VASTY2(6)  | -18,089 | 2102,200 | ,000    | 1  | ,993 | ,000   | ,000     |
|                     | VASTY2(7)  | 1,507   | ,309     | 23,789  | 1  | ,000 | 4,512  | 2,463    |
|                     | VASTY2(8)  | ,740    | ,332     | 4,967   | 1  | ,026 | 2,097  | 1,093    |
|                     | VASTY2(9)  | ,277    | ,362     | ,585    | 1  | ,444 | 1,319  | ,649     |
|                     | VASTY2(10) | ,726    | ,334     | 4,741   | 1  | ,029 | 2,067  | 1,075    |
|                     | VASTY2(11) | ,333    | ,357     | ,872    | 1  | ,350 | 1,396  | ,693     |
|                     | VASTY2(12) | 1,226   | ,315     | 15,131  | 1  | ,000 | 3,407  | 1,837    |
|                     | VASTY2(13) | 1,380   | ,311     | 19,697  | 1  | ,000 | 3,975  | 2,161    |
|                     | VASTY2(14) | ,704    | ,334     | 4,444   | 1  | ,035 | 2,022  | 1,051    |
|                     | VASTY2(15) | ,118    | ,370     | ,102    | 1  | ,749 | 1,126  | ,545     |
|                     | VASTY2(16) | -,884   | ,643     | 1,888   | 1  | ,169 | ,413   | ,117     |
|                     | VASTY2(17) | -17,963 | 2099,524 | ,000    | 1  | ,993 | ,000   | ,000     |
|                     | VASTY2(18) | -2,696  | 1,038    | 6,746   | 1  | ,009 | ,067   | ,009     |
|                     | VASTY2(19) | -2,518  | 1,040    | 5,866   | 1  | ,015 | ,081   | ,011     |
|                     | VASTY2(20) | -1,473  | ,642     | 5,267   | 1  | ,022 | ,229   | ,065     |
|                     | VASTY2(21) | ,509    | ,345     | 2,171   | 1  | ,141 | 1,664  | ,845     |
|                     | VASTY2(22) | 1,240   | ,322     | 14,832  | 1  | ,000 | 3,455  | 1,838    |
|                     | VASTY2(23) | ,535    | ,348     | 2,364   | 1  | ,124 | 1,707  | ,863     |
|                     | VASTY2(24) | 1,327   | ,312     | 18,094  | 1  | ,000 | 3,771  | 2,046    |
|                     | VASTY2(25) | -,207   | ,435     | ,227    | 1  | ,634 | ,813   | ,347     |
|                     | VASTY2(26) | -18,071 | 2350,974 | ,000    | 1  | ,994 | ,000   | ,000     |
|                     | VASTY2(27) | -18,100 | 2096,455 | ,000    | 1  | ,993 | ,000   | ,000     |
|                     | VASTY2(28) | -18,120 | 2675,298 | ,000    | 1  | ,995 | ,000   | ,000     |
|                     | VASTY2(29) | -18,037 | 2096,602 | ,000    | 1  | ,993 | ,000   | ,000     |
|                     | VASTY2(30) | -,060   | ,386     | ,024    | 1  | ,877 | ,942   | ,442     |
|                     | VASTY2(31) | -18,023 | 2095,727 | ,000    | 1  | ,993 | ,000   | ,000     |
|                     | VASTY2(32) | -1,954  | ,760     | 6,611   | 1  | ,010 | ,142   | ,032     |
|                     | VASTY2(33) | -2,670  | 1,038    | 6,616   | 1  | ,010 | ,069   | ,009     |
|                     | VASTY2(34) | ,442    | ,351     | 1,588   | 1  | ,208 | 1,556  | ,782     |
|                     | VASTY2(35) | -18,119 | 2259,904 | ,000    | 1  | ,994 | ,000   | ,000     |
|                     | Constant   | -3,248  | ,282     | 132,759 | 1  | ,000 | ,039   |          |

## Variables in the Equation

|                     |            | 95% C.I... |
|---------------------|------------|------------|
|                     |            | Upper      |
| Step 1 <sup>a</sup> | bv2        |            |
|                     | bv2(1)     | 1,117      |
|                     | bv2(2)     | 1,662      |
|                     | VASTY2     |            |
|                     | VASTY2(1)  | 3,525      |
|                     | VASTY2(2)  | 3,932      |
|                     | VASTY2(3)  | 3,749      |
|                     | VASTY2(4)  | 2,189      |
|                     | VASTY2(5)  | 1,131      |
|                     | VASTY2(6)  | .          |
|                     | VASTY2(7)  | 8,267      |
|                     | VASTY2(8)  | 4,021      |
|                     | VASTY2(9)  | 2,681      |
|                     | VASTY2(10) | 3,974      |
|                     | VASTY2(11) | 2,810      |
|                     | VASTY2(12) | 6,318      |
|                     | VASTY2(13) | 7,310      |
|                     | VASTY2(14) | 3,889      |
|                     | VASTY2(15) | 2,323      |
|                     | VASTY2(16) | 1,458      |
|                     | VASTY2(17) | .          |
|                     | VASTY2(18) | ,516       |
|                     | VASTY2(19) | ,619       |
|                     | VASTY2(20) | ,806       |
|                     | VASTY2(21) | 3,274      |
|                     | VASTY2(22) | 6,493      |
|                     | VASTY2(23) | 3,374      |
|                     | VASTY2(24) | 6,951      |
|                     | VASTY2(25) | 1,907      |
|                     | VASTY2(26) | .          |
|                     | VASTY2(27) | .          |
|                     | VASTY2(28) | .          |
|                     | VASTY2(29) | .          |
|                     | VASTY2(30) | 2,007      |
|                     | VASTY2(31) | .          |
|                     | VASTY2(32) | ,628       |
|                     | VASTY2(33) | ,530       |
|                     | VASTY2(34) | 3,093      |
|                     | VASTY2(35) | .          |
|                     | Constant   |            |

a. Variable(s) entered on step 1: bv2, VASTY2.

LOGISTIC REGRESSION VARIABLES dod01  
 /METHOD=ENTER bv3 VASTY2  
 /CONTRAST (bv3)=Indicator(1)  
 /CONTRAST (VASTY2)=Indicator(1)  
 /PRINT=CI(95)  
 /CRITERIA=PIN(0.05) POUT(0.10) ITERATE(20) CUT(0.5).

## Block 1: Method = Enter

### Omnibus Tests of Model Coefficients

|        |       | Chi-square | df | Sig. |
|--------|-------|------------|----|------|
| Step 1 | Step  | 717,578    | 37 | ,000 |
|        | Block | 717,578    | 37 | ,000 |
|        | Model | 717,578    | 37 | ,000 |

### Model Summary

| Step | -2 Log likelihood    | Cox & Snell R Square | Nagelkerke R Square |
|------|----------------------|----------------------|---------------------|
| 1    | 4307,26 <sup>a</sup> | ,056                 | ,169                |

a. Estimation terminated at iteration number 20 because maximum iterations has been reached. Final solution cannot be found.

### Classification Table<sup>a</sup>

|                    |                             | Predicted                   |                      |                    |       |
|--------------------|-----------------------------|-----------------------------|----------------------|--------------------|-------|
|                    |                             | dod01 dödsfall ja eller nej |                      | Percentage Correct |       |
| Observed           |                             | 0 inget dödsfall            | 1 minst ett dödsfall |                    |       |
| Step 1             | dod01 dödsfall ja eller nej | 0 inget dödsfall            | 11839                | 0                  | 100,0 |
|                    |                             | 1 minst ett dödsfall        | 636                  | 0                  | ,0    |
| Overall Percentage |                             |                             |                      |                    | 94,9  |

a. The cut value is ,500

## Variables in the Equation

|                     |            | B       | S.E.     | Wald    | df | Sig. | Exp(B) | 95% C.I. |
|---------------------|------------|---------|----------|---------|----|------|--------|----------|
|                     |            |         |          |         |    |      |        | Lower    |
| Step 1 <sup>a</sup> | bv3        |         |          | 15,036  | 2  | ,001 |        |          |
|                     | bv3(1)     | -,380   | ,199     | 3,646   | 1  | ,056 | ,684   | ,463     |
|                     | bv3(2)     | ,373    | ,116     | 10,375  | 1  | ,001 | 1,452  | 1,157    |
|                     | VASTY2     |         |          | 212,822 | 35 | ,000 |        |          |
|                     | VASTY2(1)  | ,641    | ,343     | 3,494   | 1  | ,062 | 1,898  | ,969     |
|                     | VASTY2(2)  | ,753    | ,334     | 5,064   | 1  | ,024 | 2,122  | 1,102    |
|                     | VASTY2(3)  | ,680    | ,335     | 4,128   | 1  | ,042 | 1,973  | 1,024    |
|                     | VASTY2(4)  | ,064    | ,371     | ,030    | 1  | ,862 | 1,066  | ,515     |
|                     | VASTY2(5)  | -,816   | ,494     | 2,724   | 1  | ,099 | ,442   | ,168     |
|                     | VASTY2(6)  | -18,094 | 2101,047 | ,000    | 1  | ,993 | ,000   | ,000     |
|                     | VASTY2(7)  | 1,475   | ,313     | 22,211  | 1  | ,000 | 4,369  | 2,366    |
|                     | VASTY2(8)  | ,790    | ,331     | 5,680   | 1  | ,017 | 2,203  | 1,151    |
|                     | VASTY2(9)  | ,321    | ,361     | ,788    | 1  | ,375 | 1,378  | ,679     |
|                     | VASTY2(10) | ,769    | ,333     | 5,331   | 1  | ,021 | 2,157  | 1,123    |
|                     | VASTY2(11) | ,350    | ,357     | ,959    | 1  | ,327 | 1,419  | ,705     |
|                     | VASTY2(12) | 1,275   | ,314     | 16,435  | 1  | ,000 | 3,577  | 1,932    |
|                     | VASTY2(13) | 1,457   | ,309     | 22,198  | 1  | ,000 | 4,291  | 2,341    |
|                     | VASTY2(14) | ,747    | ,333     | 5,019   | 1  | ,025 | 2,110  | 1,098    |
|                     | VASTY2(15) | ,167    | ,369     | ,206    | 1  | ,650 | 1,182  | ,574     |
|                     | VASTY2(16) | -,915   | ,645     | 2,017   | 1  | ,156 | ,400   | ,113     |
|                     | VASTY2(17) | -17,981 | 2099,926 | ,000    | 1  | ,993 | ,000   | ,000     |
|                     | VASTY2(18) | -2,700  | 1,038    | 6,765   | 1  | ,009 | ,067   | ,009     |
|                     | VASTY2(19) | -2,448  | 1,044    | 5,504   | 1  | ,019 | ,086   | ,011     |
|                     | VASTY2(20) | -1,470  | ,642     | 5,239   | 1  | ,022 | ,230   | ,065     |
|                     | VASTY2(21) | ,534    | ,345     | 2,399   | 1  | ,121 | 1,707  | ,868     |
|                     | VASTY2(22) | 1,173   | ,321     | 13,390  | 1  | ,000 | 3,232  | 1,724    |
|                     | VASTY2(23) | ,542    | ,348     | 2,429   | 1  | ,119 | 1,719  | ,870     |
|                     | VASTY2(24) | 1,339   | ,312     | 18,387  | 1  | ,000 | 3,814  | 2,068    |
|                     | VASTY2(25) | -,201   | ,435     | ,214    | 1  | ,644 | ,818   | ,349     |
|                     | VASTY2(26) | -18,030 | 2351,071 | ,000    | 1  | ,994 | ,000   | ,000     |
|                     | VASTY2(27) | -18,052 | 2095,802 | ,000    | 1  | ,993 | ,000   | ,000     |
|                     | VASTY2(28) | -18,045 | 2677,010 | ,000    | 1  | ,995 | ,000   | ,000     |
|                     | VASTY2(29) | -18,030 | 2099,078 | ,000    | 1  | ,993 | ,000   | ,000     |
|                     | VASTY2(30) | -,063   | ,386     | ,027    | 1  | ,871 | ,939   | ,441     |
|                     | VASTY2(31) | -18,004 | 2092,378 | ,000    | 1  | ,993 | ,000   | ,000     |
|                     | VASTY2(32) | -1,931  | ,761     | 6,434   | 1  | ,011 | ,145   | ,033     |
|                     | VASTY2(33) | -2,636  | 1,039    | 6,441   | 1  | ,011 | ,072   | ,009     |
|                     | VASTY2(34) | ,454    | ,350     | 1,681   | 1  | ,195 | 1,575  | ,793     |
|                     | VASTY2(35) | -18,134 | 2257,580 | ,000    | 1  | ,994 | ,000   | ,000     |
|                     | Constant   | -3,202  | ,273     | 137,651 | 1  | ,000 | ,041   |          |

## Variables in the Equation

|                     |            | 95% C.I... |
|---------------------|------------|------------|
|                     |            | Upper      |
| Step 1 <sup>a</sup> | bv3        |            |
|                     | bv3(1)     | 1,010      |
|                     | bv3(2)     | 1,822      |
|                     | VASTY2     |            |
|                     | VASTY2(1)  | 3,716      |
|                     | VASTY2(2)  | 4,088      |
|                     | VASTY2(3)  | 3,802      |
|                     | VASTY2(4)  | 2,208      |
|                     | VASTY2(5)  | 1,165      |
|                     | VASTY2(6)  | .          |
|                     | VASTY2(7)  | 8,068      |
|                     | VASTY2(8)  | 4,219      |
|                     | VASTY2(9)  | 2,799      |
|                     | VASTY2(10) | 4,141      |
|                     | VASTY2(11) | 2,856      |
|                     | VASTY2(12) | 6,625      |
|                     | VASTY2(13) | 7,866      |
|                     | VASTY2(14) | 4,056      |
|                     | VASTY2(15) | 2,437      |
|                     | VASTY2(16) | 1,416      |
|                     | VASTY2(17) | .          |
|                     | VASTY2(18) | ,514       |
|                     | VASTY2(19) | ,668       |
|                     | VASTY2(20) | ,810       |
|                     | VASTY2(21) | 3,356      |
|                     | VASTY2(22) | 6,059      |
|                     | VASTY2(23) | 3,399      |
|                     | VASTY2(24) | 7,033      |
|                     | VASTY2(25) | 1,918      |
|                     | VASTY2(26) | .          |
|                     | VASTY2(27) | .          |
|                     | VASTY2(28) | .          |
|                     | VASTY2(29) | .          |
|                     | VASTY2(30) | 2,001      |
|                     | VASTY2(31) | .          |
|                     | VASTY2(32) | ,645       |
|                     | VASTY2(33) | ,549       |
|                     | VASTY2(34) | 3,130      |
|                     | VASTY2(35) | .          |
|                     | Constant   |            |

a. Variable(s) entered on step 1: bv3, VASTY2.

```

1
2
3
4
5
6
7 LOGISTIC REGRESSION VARIABLES dod01
8 /METHOD=ENTER sv3 VASTY2
9 /CONTRAST (sv3)=Indicator(1)
10 /CONTRAST (VASTY2)=Indicator(1)
11 /PRINT=CI(95)
12 /CRITERIA=PIN(0.05) POUT(0.10) ITERATE(20) CUT(0.5).
13
14
15

```

## Block 1: Method = Enter

### Omnibus Tests of Model Coefficients

|        |       | Chi-square | df | Sig. |
|--------|-------|------------|----|------|
| Step 1 | Step  | 709,696    | 37 | ,000 |
|        | Block | 709,696    | 37 | ,000 |
|        | Model | 709,696    | 37 | ,000 |

### Model Summary

| Step | -2 Log likelihood    | Cox & Snell R Square | Nagelkerke R Square |
|------|----------------------|----------------------|---------------------|
| 1    | 4315,15 <sup>a</sup> | ,055                 | ,167                |

a. Estimation terminated at iteration number 20 because maximum iterations has been reached. Final solution cannot be found.

### Classification Table<sup>a</sup>

|                    |                             | Predicted                   |                      |                    |       |
|--------------------|-----------------------------|-----------------------------|----------------------|--------------------|-------|
|                    |                             | dod01 dödsfall ja eller nej |                      | Percentage Correct |       |
| Observed           |                             | 0 inget dödsfall            | 1 minst ett dödsfall |                    |       |
| Step 1             | dod01 dödsfall ja eller nej | 0 inget dödsfall            | 11839                | 0                  | 100,0 |
|                    |                             | 1 minst ett dödsfall        | 636                  | 0                  | ,0    |
| Overall Percentage |                             |                             |                      |                    | 94,9  |

a. The cut value is ,500



Variables in the Equation

|                     | B       | S.E.     | Wald    | df | Sig. | Exp(B) | 95% C.I. |       |
|---------------------|---------|----------|---------|----|------|--------|----------|-------|
|                     |         |          |         |    |      |        | Lower    | Upper |
| Step 1 <sup>a</sup> |         |          | 7,118   | 2  | ,028 |        |          |       |
| sv3                 |         |          |         |    |      |        |          |       |
| sv3(1)              | -,161   | ,116     | 1,927   | 1  | ,165 | ,851   |          | ,679  |
| sv3(2)              | ,174    | ,110     | 2,506   | 1  | ,113 | 1,190  |          | ,959  |
| VASTY2              |         |          | 219,886 | 35 | ,000 |        |          |       |
| VASTY2(1)           | ,572    | ,344     | 2,770   | 1  | ,096 | 1,771  |          | ,903  |
| VASTY2(2)           | ,654    | ,338     | 3,741   | 1  | ,053 | 1,923  |          | ,991  |
| VASTY2(3)           | ,884    | ,331     | 7,116   | 1  | ,008 | 2,421  |          | 1,264 |
| VASTY2(4)           | ,232    | ,369     | ,395    | 1  | ,529 | 1,261  |          | ,612  |
| VASTY2(5)           | -,675   | ,496     | 1,854   | 1  | ,173 | ,509   |          | ,193  |
| VASTY2(6)           | -18,126 | 2105,897 | ,000    | 1  | ,993 | ,000   |          | ,000  |
| VASTY2(7)           | 1,739   | ,306     | 32,391  | 1  | ,000 | 5,690  |          | 3,127 |
| VASTY2(8)           | ,911    | ,332     | 7,529   | 1  | ,006 | 2,487  |          | 1,297 |
| VASTY2(9)           | ,391    | ,361     | 1,172   | 1  | ,279 | 1,478  |          | ,729  |
| VASTY2(10)          | ,669    | ,338     | 3,920   | 1  | ,048 | 1,952  |          | 1,007 |
| VASTY2(11)          | ,381    | ,357     | 1,142   | 1  | ,285 | 1,464  |          | ,728  |
| VASTY2(12)          | 1,196   | ,318     | 14,164  | 1  | ,000 | 3,305  |          | 1,773 |
| VASTY2(13)          | 1,407   | ,314     | 20,080  | 1  | ,000 | 4,085  |          | 2,207 |
| VASTY2(14)          | ,725    | ,335     | 4,695   | 1  | ,030 | 2,065  |          | 1,072 |
| VASTY2(15)          | ,083    | ,372     | ,050    | 1  | ,824 | 1,086  |          | ,524  |
| VASTY2(16)          | -,855   | ,644     | 1,763   | 1  | ,184 | ,425   |          | ,121  |
| VASTY2(17)          | -17,931 | 2101,558 | ,000    | 1  | ,993 | ,000   |          | ,000  |
| VASTY2(18)          | -2,502  | 1,041    | 5,779   | 1  | ,016 | ,082   |          | ,011  |
| VASTY2(19)          | -2,510  | 1,041    | 5,812   | 1  | ,016 | ,081   |          | ,011  |
| VASTY2(20)          | -1,444  | ,642     | 5,055   | 1  | ,025 | ,236   |          | ,067  |
| VASTY2(21)          | ,617    | ,345     | 3,193   | 1  | ,074 | 1,854  |          | ,942  |
| VASTY2(22)          | 1,126   | ,320     | 12,383  | 1  | ,000 | 3,084  |          | 1,647 |
| VASTY2(23)          | ,551    | ,348     | 2,512   | 1  | ,113 | 1,735  |          | ,878  |
| VASTY2(24)          | 1,418   | ,311     | 20,832  | 1  | ,000 | 4,129  |          | 2,246 |
| VASTY2(25)          | -,153   | ,436     | ,123    | 1  | ,726 | ,858   |          | ,365  |
| VASTY2(26)          | -17,994 | 2353,533 | ,000    | 1  | ,994 | ,000   |          | ,000  |
| VASTY2(27)          | -18,075 | 2099,032 | ,000    | 1  | ,993 | ,000   |          | ,000  |
| VASTY2(28)          | -18,145 | 2679,357 | ,000    | 1  | ,995 | ,000   |          | ,000  |
| VASTY2(29)          | -18,150 | 2100,910 | ,000    | 1  | ,993 | ,000   |          | ,000  |
| VASTY2(30)          | ,067    | ,387     | ,030    | 1  | ,862 | 1,069  |          | ,501  |
| VASTY2(31)          | -17,833 | 2100,466 | ,000    | 1  | ,993 | ,000   |          | ,000  |
| VASTY2(32)          | -1,800  | ,764     | 5,550   | 1  | ,018 | ,165   |          | ,037  |
| VASTY2(33)          | -2,504  | 1,041    | 5,787   | 1  | ,016 | ,082   |          | ,011  |
| VASTY2(34)          | ,484    | ,350     | 1,910   | 1  | ,167 | 1,623  |          | ,817  |
| VASTY2(35)          | -17,998 | 2261,672 | ,000    | 1  | ,994 | ,000   |          | ,000  |
| Constant            | -3,227  | ,277     | 135,542 | 1  | ,000 | ,040   |          |       |

## Variables in the Equation

|                     |            | 95% C.I... |
|---------------------|------------|------------|
|                     |            | Upper      |
| Step 1 <sup>a</sup> | sv3        |            |
|                     | sv3(1)     | 1,068      |
|                     | sv3(2)     | 1,476      |
|                     | VASTY2     |            |
|                     | VASTY2(1)  | 3,473      |
|                     | VASTY2(2)  | 3,729      |
|                     | VASTY2(3)  | 4,635      |
|                     | VASTY2(4)  | 2,601      |
|                     | VASTY2(5)  | 1,345      |
|                     | VASTY2(6)  | .          |
|                     | VASTY2(7)  | 10,355     |
|                     | VASTY2(8)  | 4,769      |
|                     | VASTY2(9)  | 2,997      |
|                     | VASTY2(10) | 3,784      |
|                     | VASTY2(11) | 2,946      |
|                     | VASTY2(12) | 6,161      |
|                     | VASTY2(13) | 7,561      |
|                     | VASTY2(14) | 3,979      |
|                     | VASTY2(15) | 2,254      |
|                     | VASTY2(16) | 1,502      |
|                     | VASTY2(17) | .          |
|                     | VASTY2(18) | ,630       |
|                     | VASTY2(19) | ,625       |
|                     | VASTY2(20) | ,831       |
|                     | VASTY2(21) | 3,649      |
|                     | VASTY2(22) | 5,776      |
|                     | VASTY2(23) | 3,430      |
|                     | VASTY2(24) | 7,592      |
|                     | VASTY2(25) | 2,015      |
|                     | VASTY2(26) | .          |
|                     | VASTY2(27) | .          |
|                     | VASTY2(28) | .          |
|                     | VASTY2(29) | .          |
|                     | VASTY2(30) | 2,282      |
|                     | VASTY2(31) | .          |
|                     | VASTY2(32) | ,739       |
|                     | VASTY2(33) | ,629       |
|                     | VASTY2(34) | 3,226      |
|                     | VASTY2(35) | .          |
|                     | Constant   |            |

a. Variable(s) entered on step 1: sv3, VASTY2.

LOGISTIC REGRESSION VARIABLES dod01  
 /METHOD=ENTER sv5 VASTY2  
 /CONTRAST (sv5)=Indicator(1)  
 /CONTRAST (VASTY2)=Indicator(1)  
 /PRINT=CI(95)  
 /CRITERIA=PIN(0.05) POUT(0.10) ITERATE(20) CUT(0.5).

## Block 1: Method = Enter

### Omnibus Tests of Model Coefficients

|        |       | Chi-square | df | Sig. |
|--------|-------|------------|----|------|
| Step 1 | Step  | 709,941    | 39 | ,000 |
|        | Block | 709,941    | 39 | ,000 |
|        | Model | 709,941    | 39 | ,000 |

### Model Summary

| Step | -2 Log likelihood    | Cox & Snell R Square | Nagelkerke R Square |
|------|----------------------|----------------------|---------------------|
| 1    | 4314,90 <sup>a</sup> | ,055                 | ,167                |

a. Estimation terminated at iteration number 20 because maximum iterations has been reached. Final solution cannot be found.

### Classification Table<sup>a</sup>

|                    |                             | Predicted                   |                      |                    |       |
|--------------------|-----------------------------|-----------------------------|----------------------|--------------------|-------|
|                    |                             | dod01 dödsfall ja eller nej |                      | Percentage Correct |       |
| Observed           |                             | 0 inget dödsfall            | 1 minst ett dödsfall |                    |       |
| Step 1             | dod01 dödsfall ja eller nej | 0 inget dödsfall            | 11839                | 0                  | 100,0 |
|                    |                             | 1 minst ett dödsfall        | 636                  | 0                  | ,0    |
| Overall Percentage |                             |                             |                      |                    | 94,9  |

a. The cut value is ,500

## Variables in the Equation

|                     |            | B       | S.E.     | Wald    | df | Sig. | Exp(B) | 95% C.I. |
|---------------------|------------|---------|----------|---------|----|------|--------|----------|
|                     |            |         |          |         |    |      |        | Lower    |
| Step 1 <sup>a</sup> | sv5        |         |          | 7,325   | 4  | ,120 |        |          |
|                     | sv5(1)     | -,200   | ,152     | 1,738   | 1  | ,187 | ,819   | ,608     |
|                     | sv5(2)     | -,073   | ,144     | ,257    | 1  | ,612 | ,929   | ,700     |
|                     | sv5(3)     | ,089    | ,129     | ,476    | 1  | ,490 | 1,093  | ,849     |
|                     | sv5(4)     | ,225    | ,146     | 2,397   | 1  | ,122 | 1,253  | ,942     |
|                     | VASTY2     |         |          | 215,509 | 35 | ,000 |        |          |
|                     | VASTY2(1)  | ,573    | ,344     | 2,776   | 1  | ,096 | 1,773  | ,904     |
|                     | VASTY2(2)  | ,629    | ,341     | 3,407   | 1  | ,065 | 1,875  | ,962     |
|                     | VASTY2(3)  | ,877    | ,331     | 7,006   | 1  | ,008 | 2,404  | 1,256    |
|                     | VASTY2(4)  | ,235    | ,369     | ,405    | 1  | ,524 | 1,265  | ,614     |
|                     | VASTY2(5)  | -,677   | ,496     | 1,867   | 1  | ,172 | ,508   | ,192     |
|                     | VASTY2(6)  | -18,169 | 2105,569 | ,000    | 1  | ,993 | ,000   | ,000     |
|                     | VASTY2(7)  | 1,733   | ,305     | 32,197  | 1  | ,000 | 5,659  | 3,110    |
|                     | VASTY2(8)  | ,908    | ,332     | 7,458   | 1  | ,006 | 2,479  | 1,292    |
|                     | VASTY2(9)  | ,388    | ,361     | 1,159   | 1  | ,282 | 1,475  | ,727     |
|                     | VASTY2(10) | ,640    | ,341     | 3,517   | 1  | ,061 | 1,896  | ,972     |
|                     | VASTY2(11) | ,375    | ,357     | 1,107   | 1  | ,293 | 1,456  | ,723     |
|                     | VASTY2(12) | 1,184   | ,319     | 13,807  | 1  | ,000 | 3,266  | 1,749    |
|                     | VASTY2(13) | 1,379   | ,318     | 18,824  | 1  | ,000 | 3,970  | 2,129    |
|                     | VASTY2(14) | ,711    | ,336     | 4,486   | 1  | ,034 | 2,037  | 1,054    |
|                     | VASTY2(15) | ,067    | ,374     | ,032    | 1  | ,858 | 1,069  | ,514     |
|                     | VASTY2(16) | -,870   | ,644     | 1,822   | 1  | ,177 | ,419   | ,119     |
|                     | VASTY2(17) | -17,930 | 2101,497 | ,000    | 1  | ,993 | ,000   | ,000     |
|                     | VASTY2(18) | -2,472  | 1,044    | 5,611   | 1  | ,018 | ,084   | ,011     |
|                     | VASTY2(19) | -2,476  | 1,044    | 5,626   | 1  | ,018 | ,084   | ,011     |
|                     | VASTY2(20) | -1,467  | ,643     | 5,197   | 1  | ,023 | ,231   | ,065     |
|                     | VASTY2(21) | ,613    | ,346     | 3,145   | 1  | ,076 | 1,846  | ,938     |
|                     | VASTY2(22) | 1,123   | ,320     | 12,309  | 1  | ,000 | 3,074  | 1,642    |
|                     | VASTY2(23) | ,551    | ,348     | 2,511   | 1  | ,113 | 1,735  | ,878     |
|                     | VASTY2(24) | 1,407   | ,311     | 20,437  | 1  | ,000 | 4,083  | 2,219    |
|                     | VASTY2(25) | -,154   | ,436     | ,125    | 1  | ,723 | ,857   | ,365     |
|                     | VASTY2(26) | -17,995 | 2353,519 | ,000    | 1  | ,994 | ,000   | ,000     |
|                     | VASTY2(27) | -18,092 | 2098,489 | ,000    | 1  | ,993 | ,000   | ,000     |
|                     | VASTY2(28) | -18,197 | 2679,174 | ,000    | 1  | ,995 | ,000   | ,000     |
|                     | VASTY2(29) | -18,205 | 2100,873 | ,000    | 1  | ,993 | ,000   | ,000     |
|                     | VASTY2(30) | ,068    | ,387     | ,031    | 1  | ,860 | 1,071  | ,502     |
|                     | VASTY2(31) | -17,813 | 2100,234 | ,000    | 1  | ,993 | ,000   | ,000     |
|                     | VASTY2(32) | -1,771  | ,767     | 5,323   | 1  | ,021 | ,170   | ,038     |
|                     | VASTY2(33) | -2,471  | 1,044    | 5,601   | 1  | ,018 | ,085   | ,011     |
|                     | VASTY2(34) | ,480    | ,350     | 1,879   | 1  | ,170 | 1,617  | ,813     |
|                     | VASTY2(35) | -17,988 | 2261,427 | ,000    | 1  | ,994 | ,000   | ,000     |
|                     | Constant   | -3,221  | ,284     | 128,279 | 1  | ,000 | ,040   |          |

## Variables in the Equation

|                     |            | 95% C.I... |
|---------------------|------------|------------|
|                     |            | Upper      |
| Step 1 <sup>a</sup> | sv5        |            |
|                     | sv5(1)     | 1,102      |
|                     | sv5(2)     | 1,233      |
|                     | sv5(3)     | 1,408      |
|                     | sv5(4)     | 1,666      |
|                     | VASTY2     |            |
|                     | VASTY2(1)  | 3,477      |
|                     | VASTY2(2)  | 3,656      |
|                     | VASTY2(3)  | 4,602      |
|                     | VASTY2(4)  | 2,608      |
|                     | VASTY2(5)  | 1,342      |
|                     | VASTY2(6)  | .          |
|                     | VASTY2(7)  | 10,297     |
|                     | VASTY2(8)  | 4,756      |
|                     | VASTY2(9)  | 2,990      |
|                     | VASTY2(10) | 3,701      |
|                     | VASTY2(11) | 2,929      |
|                     | VASTY2(12) | 6,098      |
|                     | VASTY2(13) | 7,400      |
|                     | VASTY2(14) | 3,934      |
|                     | VASTY2(15) | 2,226      |
|                     | VASTY2(16) | 1,482      |
|                     | VASTY2(17) | .          |
|                     | VASTY2(18) | ,653       |
|                     | VASTY2(19) | ,650       |
|                     | VASTY2(20) | ,814       |
|                     | VASTY2(21) | 3,633      |
|                     | VASTY2(22) | 5,757      |
|                     | VASTY2(23) | 3,431      |
|                     | VASTY2(24) | 7,513      |
|                     | VASTY2(25) | 2,014      |
|                     | VASTY2(26) | .          |
|                     | VASTY2(27) | .          |
|                     | VASTY2(28) | .          |
|                     | VASTY2(29) | .          |
|                     | VASTY2(30) | 2,285      |
|                     | VASTY2(31) | .          |
|                     | VASTY2(32) | ,766       |
|                     | VASTY2(33) | ,654       |
|                     | VASTY2(34) | 3,212      |
|                     | VASTY2(35) | .          |
|                     | Constant   |            |

a. Variable(s) entered on step 1: sv5, VASTY2.

```
LOGISTIC REGRESSION VARIABLES dod01
/METHOD=ENTER sv7 VASTY2
/CONTRAST (sv7)=Indicator(1)
/CONTRAST (VASTY2)=Indicator(1)
/PRINT=CI(95)
/CRITERIA=PIN(0.05) POUT(0.10) ITERATE(20) CUT(0.5).
```

## Block 1: Method = Enter

### Omnibus Tests of Model Coefficients

|        |       | Chi-square | df | Sig. |
|--------|-------|------------|----|------|
| Step 1 | Step  | 716,984    | 41 | ,000 |
|        | Block | 716,984    | 41 | ,000 |
|        | Model | 716,984    | 41 | ,000 |

### Model Summary

| Step | -2 Log likelihood    | Cox & Snell R Square | Nagelkerke R Square |
|------|----------------------|----------------------|---------------------|
| 1    | 4307,86 <sup>a</sup> | ,056                 | ,168                |

a. Estimation terminated at iteration number 20 because maximum iterations has been reached. Final solution cannot be found.

### Classification Table<sup>a</sup>

|                    |                             |                      | Predicted                   |                      |                    |
|--------------------|-----------------------------|----------------------|-----------------------------|----------------------|--------------------|
|                    |                             |                      | dod01 dödsfall ja eller nej |                      | Percentage Correct |
| Observed           |                             |                      | 0 inget dödsfall            | 1 minst ett dödsfall |                    |
| Step 1             | dod01 dödsfall ja eller nej | 0 inget dödsfall     | 11839                       | 0                    | 100,0              |
|                    |                             | 1 minst ett dödsfall | 636                         | 0                    | ,0                 |
| Overall Percentage |                             |                      |                             |                      | 94,9               |

a. The cut value is ,500

## Variables in the Equation

|                     | B       | S.E.     | Wald    | df | Sig. | Exp(B) | 95% C.I. |       |
|---------------------|---------|----------|---------|----|------|--------|----------|-------|
|                     |         |          |         |    |      |        | Lower    | Upper |
| Step 1 <sup>a</sup> |         |          | 13,618  | 6  | ,034 |        |          |       |
| sv7                 |         |          |         |    |      |        |          |       |
| sv7(1)              | -,355   | ,189     | 3,510   | 1  | ,061 | ,701   | ,484     |       |
| sv7(2)              | ,155    | ,168     | ,847    | 1  | ,357 | 1,167  | ,840     |       |
| sv7(3)              | -,016   | ,169     | ,009    | 1  | ,922 | ,984   | ,707     |       |
| sv7(4)              | ,131    | ,155     | ,715    | 1  | ,398 | 1,140  | ,841     |       |
| sv7(5)              | ,222    | ,151     | 2,168   | 1  | ,141 | 1,249  | ,929     |       |
| sv7(6)              | ,327    | ,175     | 3,490   | 1  | ,062 | 1,387  | ,984     |       |
| VASTY2              |         |          | 208,518 | 35 | ,000 |        |          |       |
| VASTY2(1)           | ,570    | ,344     | 2,746   | 1  | ,097 | 1,769  | ,901     |       |
| VASTY2(2)           | ,616    | ,341     | 3,253   | 1  | ,071 | 1,851  | ,948     |       |
| VASTY2(3)           | ,867    | ,332     | 6,833   | 1  | ,009 | 2,380  | 1,242    |       |
| VASTY2(4)           | ,219    | ,370     | ,353    | 1  | ,553 | 1,245  | ,604     |       |
| VASTY2(5)           | -,660   | ,496     | 1,769   | 1  | ,183 | ,517   | ,196     |       |
| VASTY2(6)           | -18,205 | 2105,313 | ,000    | 1  | ,993 | ,000   | ,000     |       |
| VASTY2(7)           | 1,744   | ,306     | 32,553  | 1  | ,000 | 5,717  | 3,141    |       |
| VASTY2(8)           | ,893    | ,333     | 7,212   | 1  | ,007 | 2,444  | 1,273    |       |
| VASTY2(9)           | ,388    | ,361     | 1,158   | 1  | ,282 | 1,475  | ,727     |       |
| VASTY2(10)          | ,622    | ,342     | 3,304   | 1  | ,069 | 1,862  | ,953     |       |
| VASTY2(11)          | ,398    | ,357     | 1,243   | 1  | ,265 | 1,489  | ,739     |       |
| VASTY2(12)          | 1,175   | ,318     | 13,619  | 1  | ,000 | 3,239  | 1,735    |       |
| VASTY2(13)          | 1,360   | ,319     | 18,196  | 1  | ,000 | 3,897  | 2,086    |       |
| VASTY2(14)          | ,706    | ,336     | 4,415   | 1  | ,036 | 2,027  | 1,049    |       |
| VASTY2(15)          | ,050    | ,375     | ,018    | 1  | ,893 | 1,052  | ,504     |       |
| VASTY2(16)          | -,873   | ,645     | 1,833   | 1  | ,176 | ,418   | ,118     |       |
| VASTY2(17)          | -17,928 | 2097,570 | ,000    | 1  | ,993 | ,000   | ,000     |       |
| VASTY2(18)          | -2,286  | 1,047    | 4,773   | 1  | ,029 | ,102   | ,013     |       |
| VASTY2(19)          | -2,263  | 1,048    | 4,660   | 1  | ,031 | ,104   | ,013     |       |
| VASTY2(20)          | -1,475  | ,644     | 5,243   | 1  | ,022 | ,229   | ,065     |       |
| VASTY2(21)          | ,616    | ,346     | 3,181   | 1  | ,074 | 1,852  | ,941     |       |
| VASTY2(22)          | 1,118   | ,320     | 12,203  | 1  | ,000 | 3,060  | 1,634    |       |
| VASTY2(23)          | ,564    | ,348     | 2,631   | 1  | ,105 | 1,758  | ,889     |       |
| VASTY2(24)          | 1,397   | ,311     | 20,135  | 1  | ,000 | 4,044  | 2,197    |       |
| VASTY2(25)          | -,146   | ,436     | ,113    | 1  | ,737 | ,864   | ,368     |       |
| VASTY2(26)          | -17,989 | 2350,865 | ,000    | 1  | ,994 | ,000   | ,000     |       |
| VASTY2(27)          | -18,112 | 2097,325 | ,000    | 1  | ,993 | ,000   | ,000     |       |
| VASTY2(28)          | -18,236 | 2678,872 | ,000    | 1  | ,995 | ,000   | ,000     |       |
| VASTY2(29)          | -18,246 | 2100,824 | ,000    | 1  | ,993 | ,000   | ,000     |       |
| VASTY2(30)          | ,059    | ,387     | ,023    | 1  | ,879 | 1,061  | ,497     |       |
| VASTY2(31)          | -17,707 | 2095,196 | ,000    | 1  | ,993 | ,000   | ,000     |       |
| VASTY2(32)          | -1,586  | ,772     | 4,227   | 1  | ,040 | ,205   | ,045     |       |
| VASTY2(33)          | -2,258  | 1,048    | 4,637   | 1  | ,031 | ,105   | ,013     |       |
| VASTY2(34)          | ,474    | ,351     | 1,830   | 1  | ,176 | 1,607  | ,808     |       |

## Variables in the Equation

|                     |            | 95% C.I... |
|---------------------|------------|------------|
|                     |            | Upper      |
| Step 1 <sup>a</sup> | sv7        |            |
|                     | sv7(1)     | 1,017      |
|                     | sv7(2)     | 1,623      |
|                     | sv7(3)     | 1,369      |
|                     | sv7(4)     | 1,544      |
|                     | sv7(5)     | 1,678      |
|                     | sv7(6)     | 1,954      |
|                     | VASTY2     |            |
|                     | VASTY2(1)  | 3,472      |
|                     | VASTY2(2)  | 3,613      |
|                     | VASTY2(3)  | 4,559      |
|                     | VASTY2(4)  | 2,569      |
|                     | VASTY2(5)  | 1,367      |
|                     | VASTY2(6)  | .          |
|                     | VASTY2(7)  | 10,407     |
|                     | VASTY2(8)  | 4,691      |
|                     | VASTY2(9)  | 2,992      |
|                     | VASTY2(10) | 3,642      |
|                     | VASTY2(11) | 3,000      |
|                     | VASTY2(12) | 6,046      |
|                     | VASTY2(13) | 7,281      |
|                     | VASTY2(14) | 3,917      |
|                     | VASTY2(15) | 2,193      |
|                     | VASTY2(16) | 1,479      |
|                     | VASTY2(17) | .          |
|                     | VASTY2(18) | ,790       |
|                     | VASTY2(19) | ,812       |
|                     | VASTY2(20) | ,809       |
|                     | VASTY2(21) | 3,646      |
|                     | VASTY2(22) | 5,732      |
|                     | VASTY2(23) | 3,478      |
|                     | VASTY2(24) | 7,444      |
|                     | VASTY2(25) | 2,031      |
|                     | VASTY2(26) | .          |
|                     | VASTY2(27) | .          |
|                     | VASTY2(28) | .          |
|                     | VASTY2(29) | .          |
|                     | VASTY2(30) | 2,264      |
|                     | VASTY2(31) | .          |
|                     | VASTY2(32) | ,929       |
|                     | VASTY2(33) | ,816       |
|                     | VASTY2(34) | 3,194      |



**Variables in the Equation**

|            | B       | S.E.     | Wald    | df | Sig. | Exp(B) | 95% C.I. |
|------------|---------|----------|---------|----|------|--------|----------|
|            |         |          |         |    |      |        | Lower    |
| VASTY2(35) | -17,967 | 2257,374 | ,000    | 1  | ,994 | ,000   | ,000     |
| Constant   | -3,279  | ,291     | 127,145 | 1  | ,000 | ,038   |          |

**Variables in the Equation**

|            | 95% C.I. |
|------------|----------|
|            | Upper    |
| VASTY2(35) | .        |
| Constant   |          |

a. Variable(s) entered on step 1: sv7, VASTY2.

For peer review only

COMMENT körs på abo\_bjo\_vasa\_v1.sav

COMMENT med kontroll för VASTY2, weekday, holiday, season

COMMENT läses i Table 2 som första kolumnen, sex modeller, andra kolumnen, sex modeller, osv

COMMENT till Table 4 läses modellerna 1,7,13,19,25

\*\*

LOGISTIC REGRESSION VARIABLES hand01

/METHOD=ENTER bv1 VASTY2 weekday holiday season

/CONTRAST (bv1)=Indicator(1)

/CONTRAST (VASTY2)=Indicator(1)

/CONTRAST (weekday)=Indicator(1)

/CONTRAST (holiday)=Indicator(1)

/CONTRAST (season)=Indicator(1)

/PRINT=CI(95)

/CRITERIA=PIN(0.05) POUT(0.10) ITERATE(20) CUT(0.5).

## Block 1: Method = Enter

### Omnibus Tests of Model Coefficients

|        |       | Chi-square | df | Sig. |
|--------|-------|------------|----|------|
| Step 1 | Step  | 612,758    | 48 | ,000 |
|        | Block | 612,758    | 48 | ,000 |
|        | Model | 612,758    | 48 | ,000 |

### Model Summary

| Step | -2 Log likelihood    | Cox & Snell R Square | Nagelkerke R Square |
|------|----------------------|----------------------|---------------------|
| 1    | 8010,82 <sup>a</sup> | ,048                 | ,096                |

a. Estimation terminated at iteration number 6 because parameter estimates changed by less than ,001.

Classification Table<sup>a</sup>

| Observed           |                              | Predicted                    |                     |                    |       |
|--------------------|------------------------------|------------------------------|---------------------|--------------------|-------|
|                    |                              | hand01 händelse nej eller ja |                     | Percentage Correct |       |
|                    |                              | 0 ingen händelse             | 1 minst en händelse |                    |       |
| Step 1             | hand01 händelse nej eller ja | 0 ingen händelse             | 11108               | 0                  | 100,0 |
|                    |                              | 1 minst en händelse          | 1367                | 0                  | ,0    |
| Overall Percentage |                              |                              |                     |                    | 89,0  |

a. The cut value is ,500

Variables in the Equation

|                     |            | B      | S.E. | Wald    | df | Sig. | Exp(B) | 95% C.I. for EXP(B) |       |
|---------------------|------------|--------|------|---------|----|------|--------|---------------------|-------|
|                     |            |        |      |         |    |      |        | Lower               | Upper |
| Step 1 <sup>a</sup> | bv1        |        |      | 25,202  | 2  | ,000 |        |                     |       |
|                     | bv1(1)     | -,238  | ,085 | 7,908   | 1  | ,005 | ,788   | ,668                | ,930  |
|                     | bv1(2)     | ,213   | ,070 | 9,314   | 1  | ,002 | 1,237  | 1,079               | 1,418 |
|                     | VASTY2     |        |      | 436,249 | 35 | ,000 |        |                     |       |
|                     | VASTY2(1)  | ,338   | ,240 | 1,977   | 1  | ,160 | 1,402  | ,875                | 2,245 |
|                     | VASTY2(2)  | 1,195  | ,217 | 30,330  | 1  | ,000 | 3,303  | 2,159               | 5,054 |
|                     | VASTY2(3)  | -,843  | ,304 | 7,692   | 1  | ,006 | ,431   | ,237                | ,781  |
|                     | VASTY2(4)  | ,164   | ,244 | ,454    | 1  | ,501 | 1,178  | ,731                | 1,900 |
|                     | VASTY2(5)  | -,386  | ,282 | 1,869   | 1  | ,172 | ,680   | ,391                | 1,182 |
|                     | VASTY2(6)  | -1,046 | ,328 | 10,166  | 1  | ,001 | ,351   | ,185                | ,668  |
|                     | VASTY2(7)  | 1,064  | ,221 | 23,198  | 1  | ,000 | 2,897  | 1,879               | 4,467 |
|                     | VASTY2(8)  | ,264   | ,241 | 1,203   | 1  | ,273 | 1,302  | ,812                | 2,086 |
|                     | VASTY2(9)  | ,188   | ,247 | ,582    | 1  | ,446 | 1,207  | ,744                | 1,958 |
|                     | VASTY2(10) | 1,022  | ,220 | 21,642  | 1  | ,000 | 2,779  | 1,807               | 4,275 |
|                     | VASTY2(11) | ,876   | ,223 | 15,386  | 1  | ,000 | 2,402  | 1,550               | 3,721 |
|                     | VASTY2(12) | ,081   | ,248 | ,105    | 1  | ,746 | 1,084  | ,666                | 1,764 |
|                     | VASTY2(13) | ,765   | ,225 | 11,565  | 1  | ,001 | 2,149  | 1,383               | 3,340 |
|                     | VASTY2(14) | -,291  | ,268 | 1,179   | 1  | ,278 | ,748   | ,442                | 1,264 |
|                     | VASTY2(15) | ,230   | ,242 | ,902    | 1  | ,342 | 1,259  | ,783                | 2,025 |
|                     | VASTY2(16) | ,258   | ,289 | ,794    | 1  | ,373 | 1,294  | ,734                | 2,280 |
|                     | VASTY2(17) | -1,183 | ,356 | 11,055  | 1  | ,001 | ,306   | ,152                | ,615  |
|                     | VASTY2(18) | -,880  | ,320 | 7,550   | 1  | ,006 | ,415   | ,221                | ,777  |
|                     | VASTY2(19) | -1,221 | ,387 | 9,977   | 1  | ,002 | ,295   | ,138                | ,629  |
|                     | VASTY2(20) | ,024   | ,262 | ,008    | 1  | ,927 | 1,024  | ,613                | 1,711 |
|                     | VASTY2(21) | -,182  | ,263 | ,481    | 1  | ,488 | ,833   | ,498                | 1,395 |
|                     | VASTY2(22) | ,150   | ,253 | ,351    | 1  | ,553 | 1,162  | ,708                | 1,907 |
|                     | VASTY2(23) | ,711   | ,228 | 9,706   | 1  | ,002 | 2,036  | 1,302               | 3,183 |
|                     | VASTY2(24) | ,529   | ,230 | 5,282   | 1  | ,022 | 1,698  | 1,081               | 2,667 |
|                     | VASTY2(25) | ,078   | ,265 | ,087    | 1  | ,768 | 1,081  | ,644                | 1,816 |

Variables in the Equation

|            | B      | S.E. | Wald    | df | Sig. | Exp(B) | 95% C.I. for EXP(B) |       |
|------------|--------|------|---------|----|------|--------|---------------------|-------|
|            |        |      |         |    |      |        | Lower               | Upper |
| VASTY2(26) | -,900  | ,337 | 7,120   | 1  | ,008 | ,407   | ,210                | ,788  |
| VASTY2(27) | -1,309 | ,356 | 13,477  | 1  | ,000 | ,270   | ,134                | ,543  |
| VASTY2(28) | -,959  | ,372 | 6,656   | 1  | ,010 | ,383   | ,185                | ,794  |
| VASTY2(29) | -,955  | ,320 | 8,898   | 1  | ,003 | ,385   | ,206                | ,721  |
| VASTY2(30) | -,011  | ,252 | ,002    | 1  | ,964 | ,989   | ,603                | 1,622 |
| VASTY2(31) | ,501   | ,234 | 4,596   | 1  | ,032 | 1,651  | 1,044               | 2,611 |
| VASTY2(32) | -,044  | ,260 | ,029    | 1  | ,864 | ,957   | ,575                | 1,592 |
| VASTY2(33) | -,030  | ,258 | ,013    | 1  | ,908 | ,971   | ,586                | 1,609 |
| VASTY2(34) | -1,577 | ,401 | 15,468  | 1  | ,000 | ,207   | ,094                | ,453  |
| VASTY2(35) | ,324   | ,245 | 1,752   | 1  | ,186 | 1,382  | ,856                | 2,232 |
| weekday    |        |      | 18,335  | 6  | ,005 |        |                     |       |
| weekday(1) | -,032  | ,107 | ,091    | 1  | ,763 | ,968   | ,784                | 1,195 |
| weekday(2) | -,064  | ,108 | ,349    | 1  | ,555 | ,938   | ,759                | 1,160 |
| weekday(3) | ,018   | ,107 | ,028    | 1  | ,867 | 1,018  | ,826                | 1,255 |
| weekday(4) | ,026   | ,107 | ,058    | 1  | ,810 | 1,026  | ,832                | 1,266 |
| weekday(5) | -,396  | ,119 | 11,109  | 1  | ,001 | ,673   | ,533                | ,850  |
| weekday(6) | ,050   | ,108 | ,212    | 1  | ,645 | 1,051  | ,850                | 1,299 |
| holiday(1) | -,468  | ,201 | 5,407   | 1  | ,020 | ,626   | ,422                | ,929  |
| season     |        |      | 13,381  | 4  | ,010 |        |                     |       |
| season(1)  | -,070  | ,092 | ,577    | 1  | ,448 | ,932   | ,778                | 1,117 |
| season(2)  | -,170  | ,088 | 3,763   | 1  | ,052 | ,843   | ,710                | 1,002 |
| season(3)  | ,162   | ,088 | 3,384   | 1  | ,066 | 1,176  | ,989                | 1,397 |
| season(4)  | -,024  | ,093 | ,065    | 1  | ,798 | ,976   | ,813                | 1,173 |
| Constant   | -2,147 | ,202 | 113,333 | 1  | ,000 | ,117   |                     |       |

a. Variable(s) entered on step 1: bv1, VASTY2, weekday, holiday, season.

```

LOGISTIC REGRESSION VARIABLES hand01
/METHOD=ENTER bv2 VASTY2 weekday holiday season
/CONTRAST (bv2)=Indicator(1)
/CONTRAST (VASTY2)=Indicator(1)
/CONTRAST (weekday)=Indicator(1)
/CONTRAST (holiday)=Indicator(1)
/CONTRAST (season)=Indicator(1)
/PRINT=CI(95)
/CRITERIA=PIN(0.05) POUT(0.10) ITERATE(20) CUT(0.5).

```

### Block 1: Method = Enter

## Omnibus Tests of Model Coefficients

|        |       | Chi-square | df | Sig. |
|--------|-------|------------|----|------|
| Step 1 | Step  | 602,362    | 48 | ,000 |
|        | Block | 602,362    | 48 | ,000 |
|        | Model | 602,362    | 48 | ,000 |

## Model Summary

| Step | -2 Log likelihood    | Cox & Snell R Square | Nagelkerke R Square |
|------|----------------------|----------------------|---------------------|
| 1    | 8021,22 <sup>a</sup> | ,047                 | ,094                |

a. Estimation terminated at iteration number 6 because parameter estimates changed by less than ,001.

Classification Table<sup>a</sup>

| Observed           |                              | Predicted                    |                     |                    |       |
|--------------------|------------------------------|------------------------------|---------------------|--------------------|-------|
|                    |                              | hand01 händelse nej eller ja |                     | Percentage Correct |       |
|                    |                              | 0 ingen händelse             | 1 minst en händelse |                    |       |
| Step 1             | hand01 händelse nej eller ja | 0 ingen händelse             | 11108               | 0                  | 100,0 |
|                    |                              | 1 minst en händelse          | 1367                | 0                  | ,0    |
| Overall Percentage |                              |                              |                     |                    | 89,0  |

a. The cut value is ,500

## Variables in the Equation

|                         | B      | S.E. | Wald    | df | Sig. | Exp(B) | 95% C.I. for EXP(B) |       |
|-------------------------|--------|------|---------|----|------|--------|---------------------|-------|
|                         |        |      |         |    |      |        | Lower               | Upper |
| Step 1 <sup>a</sup> bv2 |        |      | 14,998  | 2  | ,001 |        |                     |       |
| bv2(1)                  | -,159  | ,085 | 3,479   | 1  | ,062 | ,853   | ,722                | 1,008 |
| bv2(2)                  | ,136   | ,077 | 3,085   | 1  | ,079 | 1,145  | ,984                | 1,333 |
| VASTY2                  |        |      | 440,228 | 35 | ,000 |        |                     |       |
| VASTY2(1)               | ,331   | ,240 | 1,899   | 1  | ,168 | 1,392  | ,870                | 2,229 |
| VASTY2(2)               | 1,200  | ,217 | 30,618  | 1  | ,000 | 3,322  | 2,171               | 5,082 |
| VASTY2(3)               | -,796  | ,303 | 6,881   | 1  | ,009 | ,451   | ,249                | ,818  |
| VASTY2(4)               | ,197   | ,243 | ,656    | 1  | ,418 | 1,218  | ,756                | 1,962 |
| VASTY2(5)               | -,377  | ,282 | 1,783   | 1  | ,182 | ,686   | ,395                | 1,193 |
| VASTY2(6)               | -1,012 | ,328 | 9,524   | 1  | ,002 | ,364   | ,191                | ,691  |
| VASTY2(7)               | 1,113  | ,220 | 25,627  | 1  | ,000 | 3,044  | 1,978               | 4,684 |
| VASTY2(8)               | ,273   | ,241 | 1,287   | 1  | ,257 | 1,314  | ,820                | 2,106 |
| VASTY2(9)               | ,203   | ,247 | ,677    | 1  | ,411 | 1,225  | ,755                | 1,987 |
| VASTY2(10)              | 1,034  | ,220 | 22,142  | 1  | ,000 | 2,812  | 1,828               | 4,326 |
| VASTY2(11)              | ,887   | ,223 | 15,800  | 1  | ,000 | 2,428  | 1,568               | 3,759 |
| VASTY2(12)              | ,093   | ,248 | ,141    | 1  | ,707 | 1,098  | ,675                | 1,786 |
| VASTY2(13)              | ,794   | ,225 | 12,453  | 1  | ,000 | 2,212  | 1,423               | 3,438 |
| VASTY2(14)              | -,275  | ,268 | 1,052   | 1  | ,305 | ,760   | ,449                | 1,284 |
| VASTY2(15)              | ,234   | ,243 | ,932    | 1  | ,334 | 1,264  | ,786                | 2,033 |
| VASTY2(16)              | ,268   | ,289 | ,859    | 1  | ,354 | 1,307  | ,742                | 2,301 |
| VASTY2(17)              | -1,179 | ,356 | 10,983  | 1  | ,001 | ,308   | ,153                | ,618  |
| VASTY2(18)              | -,878  | ,320 | 7,519   | 1  | ,006 | ,416   | ,222                | ,779  |
| VASTY2(19)              | -1,280 | ,385 | 11,041  | 1  | ,001 | ,278   | ,131                | ,592  |
| VASTY2(20)              | ,052   | ,261 | ,040    | 1  | ,842 | 1,053  | ,631                | 1,758 |
| VASTY2(21)              | -,174  | ,263 | ,436    | 1  | ,509 | ,841   | ,502                | 1,408 |
| VASTY2(22)              | ,141   | ,253 | ,313    | 1  | ,576 | 1,152  | ,702                | 1,891 |
| VASTY2(23)              | ,703   | ,228 | 9,503   | 1  | ,002 | 2,019  | 1,292               | 3,157 |
| VASTY2(24)              | ,563   | ,230 | 5,983   | 1  | ,014 | 1,756  | 1,118               | 2,758 |
| VASTY2(25)              | ,079   | ,265 | ,090    | 1  | ,764 | 1,083  | ,645                | 1,819 |
| VASTY2(26)              | -,888  | ,337 | 6,946   | 1  | ,008 | ,411   | ,212                | ,796  |
| VASTY2(27)              | -1,290 | ,356 | 13,101  | 1  | ,000 | ,275   | ,137                | ,554  |
| VASTY2(28)              | -,948  | ,372 | 6,510   | 1  | ,011 | ,387   | ,187                | ,803  |
| VASTY2(29)              | -,936  | ,320 | 8,560   | 1  | ,003 | ,392   | ,209                | ,734  |
| VASTY2(30)              | ,004   | ,252 | ,000    | 1  | ,987 | 1,004  | ,612                | 1,647 |
| VASTY2(31)              | ,510   | ,233 | 4,771   | 1  | ,029 | 1,665  | 1,054               | 2,630 |
| VASTY2(32)              | -,052  | ,259 | ,040    | 1  | ,841 | ,949   | ,571                | 1,579 |
| VASTY2(33)              | -,033  | ,257 | ,016    | 1  | ,898 | ,968   | ,584                | 1,602 |
| VASTY2(34)              | -1,567 | ,401 | 15,279  | 1  | ,000 | ,209   | ,095                | ,458  |
| VASTY2(35)              | ,365   | ,244 | 2,239   | 1  | ,135 | 1,440  | ,893                | 2,322 |
| weekday                 |        |      | 18,655  | 6  | ,005 |        |                     |       |
| weekday(1)              | -,027  | ,107 | ,065    | 1  | ,799 | ,973   | ,788                | 1,201 |
| weekday(2)              | -,060  | ,108 | ,311    | 1  | ,577 | ,942   | ,762                | 1,164 |

## Variables in the Equation

|            | B      | S.E. | Wald    | df | Sig. | Exp(B) | 95% C.I. for EXP(B) |       |
|------------|--------|------|---------|----|------|--------|---------------------|-------|
|            |        |      |         |    |      |        | Lower               | Upper |
| weekday(3) | ,021   | ,107 | ,040    | 1  | ,842 | 1,022  | ,829                | 1,259 |
| weekday(4) | ,021   | ,107 | ,039    | 1  | ,844 | 1,021  | ,828                | 1,260 |
| weekday(5) | -,401  | ,119 | 11,402  | 1  | ,001 | ,670   | ,531                | ,845  |
| weekday(6) | ,047   | ,108 | ,189    | 1  | ,664 | 1,048  | ,848                | 1,296 |
| holiday(1) | -,472  | ,201 | 5,496   | 1  | ,019 | ,624   | ,420                | ,926  |
| season     |        |      | 13,991  | 4  | ,007 |        |                     |       |
| season(1)  | -,076  | ,092 | ,676    | 1  | ,411 | ,927   | ,774                | 1,111 |
| season(2)  | -,188  | ,088 | 4,572   | 1  | ,032 | ,829   | ,698                | ,984  |
| season(3)  | ,152   | ,088 | 3,004   | 1  | ,083 | 1,165  | ,980                | 1,383 |
| season(4)  | -,031  | ,093 | ,109    | 1  | ,741 | ,970   | ,808                | 1,164 |
| Constant   | -2,144 | ,206 | 108,644 | 1  | ,000 | ,117   |                     |       |

a. Variable(s) entered on step 1: bv2, VASTY2, weekday, holiday, season.

LOGISTIC REGRESSION VARIABLES hand01

```

/METHOD=ENTER bv3 VASTY2 weekday holiday season
/CONTRAST (bv3)=Indicator(1)
/CONTRAST (VASTY2)=Indicator(1)
/CONTRAST (weekday)=Indicator(1)
/CONTRAST (holiday)=Indicator(1)
/CONTRAST (season)=Indicator(1)
/PRINT=CI(95)
/CRITERIA=PIN(0.05) POUT(0.10) ITERATE(20) CUT(0.5).

```

### Block 1: Method = Enter

#### Omnibus Tests of Model Coefficients

|        |       | Chi-square | df | Sig. |
|--------|-------|------------|----|------|
| Step 1 | Step  | 605,724    | 48 | ,000 |
|        | Block | 605,724    | 48 | ,000 |
|        | Model | 605,724    | 48 | ,000 |

**Model Summary**

| Step | -2 Log likelihood    | Cox & Snell R Square | Nagelkerke R Square |
|------|----------------------|----------------------|---------------------|
| 1    | 8017,86 <sup>a</sup> | ,047                 | ,095                |

a. Estimation terminated at iteration number 6 because parameter estimates changed by less than ,001.

**Classification Table<sup>a</sup>**

| Observed           |                              | Predicted                    |                     |                    |       |
|--------------------|------------------------------|------------------------------|---------------------|--------------------|-------|
|                    |                              | hand01 händelse nej eller ja |                     | Percentage Correct |       |
|                    |                              | 0 ingen händelse             | 1 minst en händelse |                    |       |
| Step 1             | hand01 händelse nej eller ja | 0 ingen händelse             | 11108               | 0                  | 100,0 |
|                    |                              | 1 minst en händelse          | 1367                | 0                  | ,0    |
| Overall Percentage |                              |                              |                     |                    | 89,0  |

a. The cut value is ,500

**Variables in the Equation**

|                     | B     | S.E. | Wald    | df | Sig. | Exp(B) | 95% C.I. for EXP(B) |       |
|---------------------|-------|------|---------|----|------|--------|---------------------|-------|
|                     |       |      |         |    |      |        | Lower               | Upper |
| Step 1 <sup>a</sup> |       |      |         |    |      |        |                     |       |
| bv3                 |       |      | 17,452  | 2  | ,000 |        |                     |       |
| bv3(1)              | -,418 | ,119 | 12,448  | 1  | ,000 | ,658   | ,522                | ,830  |
| bv3(2)              | ,156  | ,085 | 3,381   | 1  | ,066 | 1,168  | ,990                | 1,379 |
| VASTY2              |       |      | 440,036 | 35 | ,000 |        |                     |       |
| VASTY2(1)           | ,378  | ,240 | 2,474   | 1  | ,116 | 1,459  | ,911                | 2,337 |
| VASTY2(2)           | 1,224 | ,217 | 31,883  | 1  | ,000 | 3,400  | 2,223               | 5,199 |
| VASTY2(3)           | -,769 | ,304 | 6,424   | 1  | ,011 | ,463   | ,256                | ,840  |
| VASTY2(4)           | ,221  | ,244 | ,822    | 1  | ,365 | 1,247  | ,774                | 2,010 |
| VASTY2(5)           | -,351 | ,282 | 1,551   | 1  | ,213 | ,704   | ,405                | 1,223 |
| VASTY2(6)           | -,992 | ,328 | 9,142   | 1  | ,002 | ,371   | ,195                | ,705  |
| VASTY2(7)           | 1,128 | ,222 | 25,748  | 1  | ,000 | 3,091  | 1,999               | 4,780 |
| VASTY2(8)           | ,309  | ,240 | 1,658   | 1  | ,198 | 1,362  | ,851                | 2,181 |
| VASTY2(9)           | ,244  | ,246 | ,979    | 1  | ,322 | 1,276  | ,787                | 2,067 |
| VASTY2(10)          | 1,059 | ,219 | 23,324  | 1  | ,000 | 2,883  | 1,876               | 4,432 |
| VASTY2(11)          | ,908  | ,223 | 16,553  | 1  | ,000 | 2,479  | 1,601               | 3,840 |
| VASTY2(12)          | ,127  | ,248 | ,263    | 1  | ,608 | 1,136  | ,699                | 1,846 |
| VASTY2(13)          | ,852  | ,224 | 14,510  | 1  | ,000 | 2,344  | 1,512               | 3,633 |
| VASTY2(14)          | -,239 | ,267 | ,798    | 1  | ,372 | ,787   | ,466                | 1,330 |
| VASTY2(15)          | ,267  | ,242 | 1,219   | 1  | ,270 | 1,306  | ,813                | 2,100 |



## Variables in the Equation

|            | B      | S.E. | Wald    | df | Sig. | Exp(B) | 95% C.I. for EXP(B) |       |
|------------|--------|------|---------|----|------|--------|---------------------|-------|
|            |        |      |         |    |      |        | Lower               | Upper |
| VASTY2(16) | ,283   | ,290 | ,954    | 1  | ,329 | 1,327  | ,752                | 2,341 |
| VASTY2(17) | -1,187 | ,356 | 11,133  | 1  | ,001 | ,305   | ,152                | ,613  |
| VASTY2(18) | -,862  | ,320 | 7,242   | 1  | ,007 | ,422   | ,226                | ,791  |
| VASTY2(19) | -1,163 | ,388 | 8,980   | 1  | ,003 | ,312   | ,146                | ,669  |
| VASTY2(20) | ,077   | ,262 | ,088    | 1  | ,767 | 1,081  | ,647                | 1,805 |
| VASTY2(21) | -,153  | ,263 | ,339    | 1  | ,561 | ,858   | ,513                | 1,436 |
| VASTY2(22) | ,104   | ,252 | ,170    | 1  | ,680 | 1,110  | ,677                | 1,820 |
| VASTY2(23) | ,717   | ,228 | 9,883   | 1  | ,002 | 2,048  | 1,310               | 3,203 |
| VASTY2(24) | ,581   | ,230 | 6,379   | 1  | ,012 | 1,788  | 1,139               | 2,808 |
| VASTY2(25) | ,098   | ,265 | ,136    | 1  | ,712 | 1,103  | ,656                | 1,853 |
| VASTY2(26) | -,848  | ,337 | 6,333   | 1  | ,012 | ,428   | ,221                | ,829  |
| VASTY2(27) | -1,244 | ,356 | 12,212  | 1  | ,000 | ,288   | ,143                | ,579  |
| VASTY2(28) | -,898  | ,371 | 5,852   | 1  | ,016 | ,407   | ,197                | ,843  |
| VASTY2(29) | -,934  | ,320 | 8,521   | 1  | ,004 | ,393   | ,210                | ,736  |
| VASTY2(30) | ,002   | ,252 | ,000    | 1  | ,993 | 1,002  | ,611                | 1,643 |
| VASTY2(31) | ,562   | ,235 | 5,728   | 1  | ,017 | 1,753  | 1,107               | 2,777 |
| VASTY2(32) | ,011   | ,261 | ,002    | 1  | ,966 | 1,011  | ,606                | 1,687 |
| VASTY2(33) | ,025   | ,258 | ,010    | 1  | ,922 | 1,026  | ,618                | 1,702 |
| VASTY2(34) | -1,559 | ,401 | 15,134  | 1  | ,000 | ,210   | ,096                | ,461  |
| VASTY2(35) | ,384   | ,245 | 2,466   | 1  | ,116 | 1,469  | ,909                | 2,374 |
| weekday    |        |      | 19,567  | 6  | ,003 |        |                     |       |
| weekday(1) | -,034  | ,107 | ,103    | 1  | ,748 | ,966   | ,783                | 1,192 |
| weekday(2) | -,070  | ,108 | ,420    | 1  | ,517 | ,932   | ,754                | 1,152 |
| weekday(3) | ,014   | ,107 | ,016    | 1  | ,899 | 1,014  | ,822                | 1,249 |
| weekday(4) | ,017   | ,107 | ,024    | 1  | ,877 | 1,017  | ,824                | 1,254 |
| weekday(5) | -,413  | ,119 | 12,114  | 1  | ,001 | ,662   | ,525                | ,835  |
| weekday(6) | ,050   | ,108 | ,210    | 1  | ,647 | 1,051  | ,850                | 1,299 |
| holiday(1) | -,475  | ,201 | 5,581   | 1  | ,018 | ,622   | ,419                | ,922  |
| season     |        |      | 14,254  | 4  | ,007 |        |                     |       |
| season(1)  | -,075  | ,092 | ,658    | 1  | ,417 | ,928   | ,774                | 1,112 |
| season(2)  | -,191  | ,088 | 4,747   | 1  | ,029 | ,826   | ,696                | ,981  |
| season(3)  | ,153   | ,088 | 3,014   | 1  | ,083 | 1,165  | ,981                | 1,384 |
| season(4)  | -,029  | ,093 | ,098    | 1  | ,754 | ,971   | ,809                | 1,166 |
| Constant   | -2,139 | ,200 | 114,213 | 1  | ,000 | ,118   |                     |       |

a. Variable(s) entered on step 1: bv3, VASTY2, weekday, holiday, season.

LOGISTIC REGRESSION VARIABLES hand01

/METHOD=ENTER sv3 VASTY2 weekday holiday season

```

1
2
3 /CONTRAST (sv3)=Indicator(1)
4 /CONTRAST (VASTY2)=Indicator(1)
5 /CONTRAST (weekday)=Indicator(1)
6 /CONTRAST (holiday)=Indicator(1)
7 /CONTRAST (season)=Indicator(1)
8 /PRINT=CI(95)
9 /CRITERIA=PIN(0.05) POUT(0.10) ITERATE(20) CUT(0.5).
11
12

```

## Block 1: Method = Enter

### Omnibus Tests of Model Coefficients

|        |       | Chi-square | df | Sig. |
|--------|-------|------------|----|------|
| Step 1 | Step  | 593,799    | 48 | ,000 |
|        | Block | 593,799    | 48 | ,000 |
|        | Model | 593,799    | 48 | ,000 |

### Model Summary

| Step | -2 Log likelihood    | Cox & Snell R Square | Nagelkerke R Square |
|------|----------------------|----------------------|---------------------|
| 1    | 8029,78 <sup>a</sup> | ,046                 | ,093                |

a. Estimation terminated at iteration number 6 because parameter estimates changed by less than ,001.

### Classification Table<sup>a</sup>

| Observed           |                              |                     | Predicted                    |                     |                    |
|--------------------|------------------------------|---------------------|------------------------------|---------------------|--------------------|
|                    |                              |                     | hand01 händelse nej eller ja |                     | Percentage Correct |
|                    |                              |                     | 0 ingen händelse             | 1 minst en händelse |                    |
| Step 1             | hand01 händelse nej eller ja | 0 ingen händelse    | 11108                        | 0                   | 100,0              |
|                    |                              | 1 minst en händelse | 1367                         | 0                   | ,0                 |
| Overall Percentage |                              |                     |                              |                     | 89,0               |

a. The cut value is ,500

## Variables in the Equation

|                     | B      | S.E. | Wald    | df | Sig. | Exp(B) | 95% C.I. for EXP(B) |       |
|---------------------|--------|------|---------|----|------|--------|---------------------|-------|
|                     |        |      |         |    |      |        | Lower               | Upper |
| Step 1 <sup>a</sup> |        |      |         |    |      |        |                     |       |
| sv3                 |        |      | 6,576   | 2  | ,037 |        |                     |       |
| sv3(1)              | -,121  | ,086 | 1,964   | 1  | ,161 | ,886   | ,749                | 1,049 |
| sv3(2)              | ,121   | ,084 | 2,074   | 1  | ,150 | 1,128  | ,957                | 1,329 |
| VASTY2              |        |      | 437,718 | 35 | ,000 |        |                     |       |
| VASTY2(1)           | ,315   | ,241 | 1,713   | 1  | ,191 | 1,371  | ,855                | 2,198 |
| VASTY2(2)           | 1,154  | ,220 | 27,492  | 1  | ,000 | 3,169  | 2,059               | 4,878 |
| VASTY2(3)           | -,655  | ,302 | 4,706   | 1  | ,030 | ,519   | ,287                | ,939  |
| VASTY2(4)           | ,310   | ,242 | 1,641   | 1  | ,200 | 1,364  | ,848                | 2,193 |
| VASTY2(5)           | -,264  | ,283 | ,869    | 1  | ,351 | ,768   | ,441                | 1,338 |
| VASTY2(6)           | -1,049 | ,331 | 10,057  | 1  | ,002 | ,350   | ,183                | ,670  |
| VASTY2(7)           | 1,260  | ,217 | 33,606  | 1  | ,000 | 3,524  | 2,302               | 5,394 |
| VASTY2(8)           | ,389   | ,241 | 2,613   | 1  | ,106 | 1,476  | ,921                | 2,365 |
| VASTY2(9)           | ,275   | ,246 | 1,251   | 1  | ,263 | 1,317  | ,813                | 2,132 |
| VASTY2(10)          | ,990   | ,224 | 19,591  | 1  | ,000 | 2,692  | 1,736               | 4,174 |
| VASTY2(11)          | ,917   | ,223 | 16,909  | 1  | ,000 | 2,501  | 1,616               | 3,872 |
| VASTY2(12)          | ,070   | ,251 | ,077    | 1  | ,781 | 1,072  | ,656                | 1,752 |
| VASTY2(13)          | ,804   | ,228 | 12,431  | 1  | ,000 | 2,235  | 1,429               | 3,495 |
| VASTY2(14)          | -,272  | ,269 | 1,022   | 1  | ,312 | ,762   | ,450                | 1,290 |
| VASTY2(15)          | ,202   | ,245 | ,676    | 1  | ,411 | 1,223  | ,756                | 1,979 |
| VASTY2(16)          | ,271   | ,289 | ,882    | 1  | ,348 | 1,312  | ,745                | 2,311 |
| VASTY2(17)          | -1,163 | ,356 | 10,679  | 1  | ,001 | ,312   | ,155                | ,628  |
| VASTY2(18)          | -,747  | ,325 | 5,276   | 1  | ,022 | ,474   | ,251                | ,896  |
| VASTY2(19)          | -1,284 | ,387 | 10,981  | 1  | ,001 | ,277   | ,130                | ,592  |
| VASTY2(20)          | ,057   | ,262 | ,048    | 1  | ,827 | 1,059  | ,634                | 1,769 |
| VASTY2(21)          | -,104  | ,263 | ,156    | 1  | ,692 | ,901   | ,538                | 1,509 |
| VASTY2(22)          | ,062   | ,252 | ,061    | 1  | ,805 | 1,064  | ,649                | 1,744 |
| VASTY2(23)          | ,713   | ,228 | 9,763   | 1  | ,002 | 2,039  | 1,304               | 3,189 |
| VASTY2(24)          | ,614   | ,229 | 7,163   | 1  | ,007 | 1,848  | 1,179               | 2,897 |
| VASTY2(25)          | ,115   | ,265 | ,187    | 1  | ,665 | 1,122  | ,667                | 1,887 |
| VASTY2(26)          | -,845  | ,337 | 6,302   | 1  | ,012 | ,429   | ,222                | ,831  |
| VASTY2(27)          | -1,286 | ,357 | 12,973  | 1  | ,000 | ,276   | ,137                | ,556  |
| VASTY2(28)          | -,974  | ,375 | 6,762   | 1  | ,009 | ,378   | ,181                | ,787  |
| VASTY2(29)          | -1,019 | ,325 | 9,861   | 1  | ,002 | ,361   | ,191                | ,682  |
| VASTY2(30)          | ,090   | ,253 | ,125    | 1  | ,723 | 1,094  | ,666                | 1,796 |
| VASTY2(31)          | ,632   | ,238 | 7,037   | 1  | ,008 | 1,882  | 1,180               | 3,003 |
| VASTY2(32)          | ,045   | ,266 | ,028    | 1  | ,867 | 1,046  | ,621                | 1,760 |
| VASTY2(33)          | ,075   | ,264 | ,080    | 1  | ,777 | 1,078  | ,643                | 1,808 |
| VASTY2(34)          | -1,540 | ,401 | 14,764  | 1  | ,000 | ,214   | ,098                | ,470  |
| VASTY2(35)          | ,432   | ,243 | 3,170   | 1  | ,075 | 1,541  | ,957                | 2,481 |
| weekday             |        |      | 19,432  | 6  | ,003 |        |                     |       |
| weekday(1)          | -,029  | ,107 | ,073    | 1  | ,787 | ,971   | ,787                | 1,199 |
| weekday(2)          | -,059  | ,108 | ,293    | 1  | ,588 | ,943   | ,763                | 1,166 |

## Variables in the Equation

|            | B      | S.E. | Wald    | df | Sig. | Exp(B) | 95% C.I. for EXP(B) |       |
|------------|--------|------|---------|----|------|--------|---------------------|-------|
|            |        |      |         |    |      |        | Lower               | Upper |
| weekday(3) | ,025   | ,107 | ,056    | 1  | ,814 | 1,025  | ,832                | 1,264 |
| weekday(4) | ,028   | ,107 | ,070    | 1  | ,791 | 1,029  | ,834                | 1,270 |
| weekday(5) | -,411  | ,119 | 11,974  | 1  | ,001 | ,663   | ,525                | ,837  |
| weekday(6) | ,034   | ,108 | ,100    | 1  | ,752 | 1,035  | ,837                | 1,279 |
| holiday(1) | -,478  | ,201 | 5,647   | 1  | ,017 | ,620   | ,418                | ,920  |
| season     |        |      | 15,282  | 4  | ,004 |        |                     |       |
| season(1)  | -,084  | ,092 | ,827    | 1  | ,363 | ,920   | ,768                | 1,102 |
| season(2)  | -,207  | ,088 | 5,579   | 1  | ,018 | ,813   | ,685                | ,965  |
| season(3)  | ,147   | ,088 | 2,796   | 1  | ,095 | 1,158  | ,975                | 1,376 |
| season(4)  | -,040  | ,093 | ,184    | 1  | ,668 | ,961   | ,800                | 1,153 |
| Constant   | -2,163 | ,204 | 112,859 | 1  | ,000 | ,115   |                     |       |

a. Variable(s) entered on step 1: sv3, VASTY2, weekday, holiday, season.

LOGISTIC REGRESSION VARIABLES hand01

/METHOD=ENTER sv5 VASTY2 weekday holiday season

/CONTRAST (sv5)=Indicator(1)

/CONTRAST (VASTY2)=Indicator(1)

/CONTRAST (weekday)=Indicator(1)

/CONTRAST (holiday)=Indicator(1)

/CONTRAST (season)=Indicator(1)

/PRINT=CI(95)

/CRITERIA=PIN(0.05) POUT(0.10) ITERATE(20) CUT(0.5).

### Block 1: Method = Enter

#### Omnibus Tests of Model Coefficients

|        |       | Chi-square | df | Sig. |
|--------|-------|------------|----|------|
| Step 1 | Step  | 600,509    | 50 | ,000 |
|        | Block | 600,509    | 50 | ,000 |
|        | Model | 600,509    | 50 | ,000 |

**Model Summary**

| Step | -2 Log likelihood    | Cox & Snell R Square | Nagelkerke R Square |
|------|----------------------|----------------------|---------------------|
| 1    | 8023,07 <sup>a</sup> | ,047                 | ,094                |

a. Estimation terminated at iteration number 6 because parameter estimates changed by less than ,001.

**Classification Table<sup>a</sup>**

| Observed           |                              | Predicted                    |                     |                    |       |
|--------------------|------------------------------|------------------------------|---------------------|--------------------|-------|
|                    |                              | hand01 händelse nej eller ja |                     | Percentage Correct |       |
|                    |                              | 0 ingen händelse             | 1 minst en händelse |                    |       |
| Step 1             | hand01 händelse nej eller ja | 0 ingen händelse             | 11108               | 0                  | 100,0 |
|                    |                              | 1 minst en händelse          | 1367                | 0                  | ,0    |
| Overall Percentage |                              |                              |                     |                    | 89,0  |

a. The cut value is ,500

**Variables in the Equation**

|                     | B      | S.E. | Wald    | df | Sig. | Exp(B) | 95% C.I. for EXP(B) |       |
|---------------------|--------|------|---------|----|------|--------|---------------------|-------|
|                     |        |      |         |    |      |        | Lower               | Upper |
| Step 1 <sup>a</sup> |        |      |         |    |      |        |                     |       |
| sv5                 |        |      | 13,344  | 4  | ,010 |        |                     |       |
| sv5(1)              | -,171  | ,109 | 2,454   | 1  | ,117 | ,842   | ,680                | 1,044 |
| sv5(2)              | -,043  | ,108 | ,160    | 1  | ,689 | ,958   | ,775                | 1,184 |
| sv5(3)              | -,069  | ,100 | ,474    | 1  | ,491 | ,933   | ,767                | 1,136 |
| sv5(4)              | ,224   | ,109 | 4,251   | 1  | ,039 | 1,251  | 1,011               | 1,548 |
| VASTY2              |        |      | 438,244 | 35 | ,000 |        |                     |       |
| VASTY2(1)           | ,299   | ,241 | 1,537   | 1  | ,215 | 1,348  | ,841                | 2,163 |
| VASTY2(2)           | 1,090  | ,222 | 24,070  | 1  | ,000 | 2,974  | 1,924               | 4,597 |
| VASTY2(3)           | -,670  | ,302 | 4,916   | 1  | ,027 | ,512   | ,283                | ,925  |
| VASTY2(4)           | ,306   | ,242 | 1,600   | 1  | ,206 | 1,359  | ,845                | 2,184 |
| VASTY2(5)           | -,288  | ,283 | 1,029   | 1  | ,310 | ,750   | ,430                | 1,307 |
| VASTY2(6)           | -1,161 | ,334 | 12,051  | 1  | ,001 | ,313   | ,163                | ,603  |
| VASTY2(7)           | 1,259  | ,217 | 33,591  | 1  | ,000 | 3,520  | 2,300               | 5,388 |
| VASTY2(8)           | ,363   | ,241 | 2,270   | 1  | ,132 | 1,438  | ,897                | 2,306 |
| VASTY2(9)           | ,283   | ,246 | 1,320   | 1  | ,251 | 1,326  | ,819                | 2,148 |
| VASTY2(10)          | ,912   | ,227 | 16,180  | 1  | ,000 | 2,489  | 1,596               | 3,882 |
| VASTY2(11)          | ,908   | ,223 | 16,576  | 1  | ,000 | 2,479  | 1,601               | 3,838 |
| VASTY2(12)          | ,034   | ,251 | ,018    | 1  | ,892 | 1,035  | ,632                | 1,694 |
| VASTY2(13)          | ,723   | ,231 | 9,766   | 1  | ,002 | 2,061  | 1,309               | 3,243 |

## Variables in the Equation

|            | B      | S.E. | Wald    | df | Sig. | Exp(B) | 95% C.I. for EXP(B) |       |
|------------|--------|------|---------|----|------|--------|---------------------|-------|
|            |        |      |         |    |      |        | Lower               | Upper |
| VASTY2(14) | -,312  | ,269 | 1,342   | 1  | ,247 | ,732   | ,432                | 1,241 |
| VASTY2(15) | ,145   | ,247 | ,345    | 1  | ,557 | 1,156  | ,713                | 1,876 |
| VASTY2(16) | ,228   | ,290 | ,620    | 1  | ,431 | 1,257  | ,712                | 2,219 |
| VASTY2(17) | -1,183 | ,356 | 11,032  | 1  | ,001 | ,306   | ,152                | ,616  |
| VASTY2(18) | -,740  | ,329 | 5,064   | 1  | ,024 | ,477   | ,251                | ,909  |
| VASTY2(19) | -1,274 | ,391 | 10,613  | 1  | ,001 | ,280   | ,130                | ,602  |
| VASTY2(20) | -,005  | ,264 | ,000    | 1  | ,986 | ,995   | ,594                | 1,669 |
| VASTY2(21) | -,112  | ,263 | ,182    | 1  | ,670 | ,894   | ,534                | 1,497 |
| VASTY2(22) | ,053   | ,252 | ,044    | 1  | ,834 | 1,054  | ,643                | 1,728 |
| VASTY2(23) | ,703   | ,228 | 9,499   | 1  | ,002 | 2,020  | 1,292               | 3,159 |
| VASTY2(24) | ,584   | ,230 | 6,458   | 1  | ,011 | 1,794  | 1,143               | 2,815 |
| VASTY2(25) | ,091   | ,266 | ,118    | 1  | ,731 | 1,096  | ,651                | 1,844 |
| VASTY2(26) | -,851  | ,337 | 6,380   | 1  | ,012 | ,427   | ,221                | ,826  |
| VASTY2(27) | -1,338 | ,358 | 13,947  | 1  | ,000 | ,262   | ,130                | ,530  |
| VASTY2(28) | -1,106 | ,379 | 8,528   | 1  | ,003 | ,331   | ,158                | ,695  |
| VASTY2(29) | -1,159 | ,330 | 12,360  | 1  | ,000 | ,314   | ,164                | ,599  |
| VASTY2(30) | ,074   | ,253 | ,086    | 1  | ,770 | 1,077  | ,656                | 1,769 |
| VASTY2(31) | ,627   | ,241 | 6,767   | 1  | ,009 | 1,871  | 1,167               | 3,001 |
| VASTY2(32) | ,051   | ,270 | ,035    | 1  | ,851 | 1,052  | ,620                | 1,786 |
| VASTY2(33) | ,085   | ,269 | ,100    | 1  | ,752 | 1,089  | ,643                | 1,844 |
| VASTY2(34) | -1,549 | ,401 | 14,941  | 1  | ,000 | ,212   | ,097                | ,466  |
| VASTY2(35) | ,435   | ,243 | 3,201   | 1  | ,074 | 1,545  | ,959                | 2,489 |
| weekday    |        |      | 18,792  | 6  | ,005 |        |                     |       |
| weekday(1) | -,023  | ,107 | ,046    | 1  | ,830 | ,977   | ,792                | 1,206 |
| weekday(2) | -,055  | ,108 | ,260    | 1  | ,610 | ,946   | ,766                | 1,170 |
| weekday(3) | ,024   | ,107 | ,051    | 1  | ,821 | 1,024  | ,831                | 1,263 |
| weekday(4) | ,034   | ,107 | ,100    | 1  | ,752 | 1,035  | ,838                | 1,277 |
| weekday(5) | -,402  | ,119 | 11,427  | 1  | ,001 | ,669   | ,530                | ,844  |
| weekday(6) | ,036   | ,108 | ,111    | 1  | ,739 | 1,037  | ,839                | 1,281 |
| holiday(1) | -,481  | ,202 | 5,685   | 1  | ,017 | ,618   | ,417                | ,918  |
| season     |        |      | 14,175  | 4  | ,007 |        |                     |       |
| season(1)  | -,078  | ,092 | ,711    | 1  | ,399 | ,925   | ,772                | 1,108 |
| season(2)  | -,196  | ,088 | 4,969   | 1  | ,026 | ,822   | ,692                | ,977  |
| season(3)  | ,146   | ,088 | 2,772   | 1  | ,096 | 1,158  | ,974                | 1,375 |
| season(4)  | -,031  | ,093 | ,113    | 1  | ,737 | ,969   | ,807                | 1,164 |
| Constant   | -2,130 | ,209 | 103,891 | 1  | ,000 | ,119   |                     |       |

a. Variable(s) entered on step 1: sv5, VASTY2, weekday, holiday, season.

```

LOGISTIC REGRESSION VARIABLES hand01
/METHOD=ENTER sv7 VASTY2 weekday holiday season
/CONTRAST (sv7)=Indicator(1)
/CONTRAST (VASTY2)=Indicator(1)
/CONTRAST (weekday)=Indicator(1)
/CONTRAST (holiday)=Indicator(1)
/CONTRAST (season)=Indicator(1)
/PRINT=CI(95)
/CRITERIA=PIN(0.05) POUT(0.10) ITERATE(20) CUT(0.5).

```

## Block 1: Method = Enter

### Omnibus Tests of Model Coefficients

|        |       | Chi-square | df | Sig. |
|--------|-------|------------|----|------|
| Step 1 | Step  | 604,438    | 52 | ,000 |
|        | Block | 604,438    | 52 | ,000 |
|        | Model | 604,438    | 52 | ,000 |

### Model Summary

| Step | -2 Log likelihood    | Cox & Snell R Square | Nagelkerke R Square |
|------|----------------------|----------------------|---------------------|
| 1    | 8019,14 <sup>a</sup> | ,047                 | ,095                |

a. Estimation terminated at iteration number 6 because parameter estimates changed by less than ,001.

### Classification Table<sup>a</sup>

| Observed           |                              | Predicted                    |                     |                    |       |
|--------------------|------------------------------|------------------------------|---------------------|--------------------|-------|
|                    |                              | hand01 händelse nej eller ja |                     | Percentage Correct |       |
|                    |                              | 0 ingen händelse             | 1 minst en händelse |                    |       |
| Step 1             | hand01 händelse nej eller ja | 0 ingen händelse             | 11108               | 0                  | 100,0 |
|                    |                              | 1 minst en händelse          | 1367                | 0                  | ,0    |
| Overall Percentage |                              |                              |                     |                    | 89,0  |

a. The cut value is ,500

## Variables in the Equation

|                     | B      | S.E. | Wald    | df | Sig. | Exp(B) | 95% C.I. for EXP(B) |       |
|---------------------|--------|------|---------|----|------|--------|---------------------|-------|
|                     |        |      |         |    |      |        | Lower               | Upper |
| Step 1 <sup>a</sup> |        |      |         |    |      |        |                     |       |
| sv7                 |        |      | 17,254  | 6  | ,008 |        |                     |       |
| sv7(1)              | -,258  | ,126 | 4,229   | 1  | ,040 | ,772   | ,604                | ,988  |
| sv7(2)              | -,052  | ,127 | ,169    | 1  | ,681 | ,949   | ,740                | 1,218 |
| sv7(3)              | -,109  | ,126 | ,754    | 1  | ,385 | ,897   | ,701                | 1,147 |
| sv7(4)              | -,064  | ,119 | ,293    | 1  | ,588 | ,938   | ,743                | 1,184 |
| sv7(5)              | ,022   | ,113 | ,037    | 1  | ,847 | 1,022  | ,819                | 1,275 |
| sv7(6)              | ,294   | ,127 | 5,396   | 1  | ,020 | 1,342  | 1,047               | 1,720 |
| VASTY2              |        |      | 437,602 | 35 | ,000 |        |                     |       |
| VASTY2(1)           | ,303   | ,241 | 1,579   | 1  | ,209 | 1,354  | ,844                | 2,173 |
| VASTY2(2)           | 1,071  | ,223 | 23,151  | 1  | ,000 | 2,918  | 1,886               | 4,513 |
| VASTY2(3)           | -,676  | ,302 | 4,999   | 1  | ,025 | ,509   | ,281                | ,920  |
| VASTY2(4)           | ,296   | ,242 | 1,491   | 1  | ,222 | 1,345  | ,836                | 2,163 |
| VASTY2(5)           | -,271  | ,284 | ,916    | 1  | ,338 | ,762   | ,437                | 1,329 |
| VASTY2(6)           | -1,227 | ,337 | 13,247  | 1  | ,000 | ,293   | ,152                | ,568  |
| VASTY2(7)           | 1,255  | ,217 | 33,369  | 1  | ,000 | 3,507  | 2,291               | 5,368 |
| VASTY2(8)           | ,366   | ,241 | 2,307   | 1  | ,129 | 1,442  | ,899                | 2,314 |
| VASTY2(9)           | ,274   | ,246 | 1,241   | 1  | ,265 | 1,315  | ,812                | 2,130 |
| VASTY2(10)          | ,888   | ,227 | 15,274  | 1  | ,000 | 2,431  | 1,557               | 3,795 |
| VASTY2(11)          | ,915   | ,223 | 16,802  | 1  | ,000 | 2,497  | 1,612               | 3,868 |
| VASTY2(12)          | ,026   | ,251 | ,011    | 1  | ,917 | 1,026  | ,627                | 1,680 |
| VASTY2(13)          | ,692   | ,232 | 8,896   | 1  | ,003 | 1,999  | 1,268               | 3,150 |
| VASTY2(14)          | -,322  | ,270 | 1,427   | 1  | ,232 | ,725   | ,427                | 1,229 |
| VASTY2(15)          | ,121   | ,248 | ,239    | 1  | ,625 | 1,129  | ,695                | 1,834 |
| VASTY2(16)          | ,205   | ,291 | ,496    | 1  | ,481 | 1,227  | ,694                | 2,170 |
| VASTY2(17)          | -1,185 | ,356 | 11,067  | 1  | ,001 | ,306   | ,152                | ,614  |
| VASTY2(18)          | -,680  | ,331 | 4,213   | 1  | ,040 | ,507   | ,265                | ,970  |
| VASTY2(19)          | -1,205 | ,394 | 9,363   | 1  | ,002 | ,300   | ,138                | ,648  |
| VASTY2(20)          | -,029  | ,264 | ,012    | 1  | ,911 | ,971   | ,578                | 1,630 |
| VASTY2(21)          | -,115  | ,263 | ,190    | 1  | ,663 | ,892   | ,532                | 1,493 |
| VASTY2(22)          | ,057   | ,252 | ,051    | 1  | ,821 | 1,059  | ,646                | 1,735 |
| VASTY2(23)          | ,709   | ,228 | 9,646   | 1  | ,002 | 2,031  | 1,299               | 3,177 |
| VASTY2(24)          | ,580   | ,230 | 6,365   | 1  | ,012 | 1,786  | 1,138               | 2,804 |
| VASTY2(25)          | ,102   | ,266 | ,146    | 1  | ,702 | 1,107  | ,658                | 1,863 |
| VASTY2(26)          | -,853  | ,337 | 6,406   | 1  | ,011 | ,426   | ,220                | ,825  |
| VASTY2(27)          | -1,369 | ,359 | 14,543  | 1  | ,000 | ,254   | ,126                | ,514  |
| VASTY2(28)          | -1,183 | ,382 | 9,587   | 1  | ,002 | ,306   | ,145                | ,648  |
| VASTY2(29)          | -1,242 | ,334 | 13,838  | 1  | ,000 | ,289   | ,150                | ,556  |
| VASTY2(30)          | ,077   | ,253 | ,094    | 1  | ,760 | 1,081  | ,658                | 1,775 |
| VASTY2(31)          | ,664   | ,242 | 7,543   | 1  | ,006 | 1,942  | 1,209               | 3,118 |
| VASTY2(32)          | ,111   | ,273 | ,167    | 1  | ,683 | 1,118  | ,655                | 1,908 |
| VASTY2(33)          | ,154   | ,273 | ,316    | 1  | ,574 | 1,166  | ,683                | 1,992 |
| VASTY2(34)          | -1,551 | ,401 | 14,976  | 1  | ,000 | ,212   | ,097                | ,465  |



Variables in the Equation

|            | B      | S.E. | Wald   | df | Sig. | Exp(B) | 95% C.I. for EXP(B) |       |
|------------|--------|------|--------|----|------|--------|---------------------|-------|
|            |        |      |        |    |      |        | Lower               | Upper |
| VASTY2(35) | ,431   | ,243 | 3,128  | 1  | ,077 | 1,538  | ,954                | 2,479 |
| weekday    |        |      | 18,676 | 6  | ,005 |        |                     |       |
| weekday(1) | -,024  | ,107 | ,052   | 1  | ,820 | ,976   | ,791                | 1,205 |
| weekday(2) | -,053  | ,108 | ,237   | 1  | ,627 | ,949   | ,767                | 1,173 |
| weekday(3) | ,027   | ,107 | ,064   | 1  | ,800 | 1,027  | ,833                | 1,267 |
| weekday(4) | ,035   | ,107 | ,107   | 1  | ,744 | 1,036  | ,839                | 1,279 |
| weekday(5) | -,399  | ,119 | 11,250 | 1  | ,001 | ,671   | ,531                | ,847  |
| weekday(6) | ,039   | ,108 | ,132   | 1  | ,717 | 1,040  | ,841                | 1,286 |
| holiday(1) | -,474  | ,202 | 5,537  | 1  | ,019 | ,622   | ,419                | ,924  |
| season     |        |      | 13,156 | 4  | ,011 |        |                     |       |
| season(1)  | -,076  | ,092 | ,678   | 1  | ,410 | ,927   | ,774                | 1,111 |
| season(2)  | -,186  | ,088 | 4,484  | 1  | ,034 | ,830   | ,698                | ,986  |
| season(3)  | ,144   | ,088 | 2,677  | 1  | ,102 | 1,155  | ,972                | 1,372 |
| season(4)  | -,030  | ,093 | ,100   | 1  | ,751 | ,971   | ,808                | 1,166 |
| Constant   | -2,116 | ,213 | 98,831 | 1  | ,000 | ,121   |                     |       |

a. Variable(s) entered on step 1: sv7, VASTY2, weekday, holiday, season.

\*\*

```
LOGISTIC REGRESSION VARIABLES luonnelt1
/METHOD=ENTER bv1 VASTY2 weekday holiday season
/CONTRAST (bv1)=Indicator(1)
/CONTRAST (VASTY2)=Indicator(1)
/CONTRAST (weekday)=Indicator(1)
/CONTRAST (holiday)=Indicator(1)
/CONTRAST (season)=Indicator(1)
/PRINT=CI(95)
/CRITERIA=PIN(0.05) POUT(0.10) ITERATE(20) CUT(0.5).
```

**Block 1: Method = Enter**

**Omnibus Tests of Model Coefficients**

|        |       | Chi-square | df | Sig. |
|--------|-------|------------|----|------|
| Step 1 | Step  | 340,523    | 48 | ,000 |
|        | Block | 340,523    | 48 | ,000 |
|        | Model | 340,523    | 48 | ,000 |

**Model Summary**

| Step | -2 Log likelihood    | Cox & Snell R Square | Nagelkerke R Square |
|------|----------------------|----------------------|---------------------|
| 1    | 5856,35 <sup>a</sup> | ,027                 | ,069                |

a. Estimation terminated at iteration number 7 because parameter estimates changed by less than ,001.

**Classification Table<sup>a</sup>**

|                    |                                                |                                                              | Predicted                                    |
|--------------------|------------------------------------------------|--------------------------------------------------------------|----------------------------------------------|
|                    |                                                |                                                              | luonnelt1<br>luonne<br>highest = ...         |
| Observed           |                                                |                                                              | 0 ingen<br>händelse<br>eller läheltä<br>piti |
| Step 1             | luonnelt1 luonne highest = tapahtui potilaalle | 0 ingen händelse eller läheltä piti<br>1 tapahtui potilaalle | 11627<br>848                                 |
| Overall Percentage |                                                |                                                              |                                              |

**Classification Table<sup>a</sup>**

|                    |                                                |                                                              | Predicted                            |
|--------------------|------------------------------------------------|--------------------------------------------------------------|--------------------------------------|
|                    |                                                |                                                              | luonnelt1<br>luonne<br>highest = ... |
| Observed           |                                                |                                                              | 1 tapahtui<br>potilaalle             |
| Step 1             | luonnelt1 luonne highest = tapahtui potilaalle | 0 ingen händelse eller läheltä piti<br>1 tapahtui potilaalle | 0<br>0                               |
| Overall Percentage |                                                |                                                              |                                      |

Classification Table<sup>a</sup>

|                    |                                                |                                                              | Predicted          |
|--------------------|------------------------------------------------|--------------------------------------------------------------|--------------------|
|                    |                                                |                                                              |                    |
| Observed           |                                                |                                                              | Percentage Correct |
| Step 1             | luonnelt1 luonne highest = tapahtui potilaalle | 0 ingen händelse eller läheltä piti<br>1 tapahtui potilaalle | 100,0<br>,0        |
| Overall Percentage |                                                |                                                              | 93,2               |

a. The cut value is ,500

Variables in the Equation

|                     |            | B      | S.E. | Wald    | df | Sig. | Exp(B) | 95% C.I. for EXP(B) |       |
|---------------------|------------|--------|------|---------|----|------|--------|---------------------|-------|
|                     |            |        |      |         |    |      |        | Lower               | Upper |
| Step 1 <sup>a</sup> | bv1        |        |      | 8,766   | 2  | ,012 |        |                     |       |
|                     | bv1(1)     | -,246  | ,103 | 5,744   | 1  | ,017 | ,782   | ,640                | ,956  |
|                     | bv1(2)     | ,079   | ,086 | ,834    | 1  | ,361 | 1,082  | ,914                | 1,280 |
|                     | VASTY2     |        |      | 238,129 | 35 | ,000 |        |                     |       |
|                     | VASTY2(1)  | ,096   | ,299 | ,102    | 1  | ,750 | 1,100  | ,612                | 1,979 |
|                     | VASTY2(2)  | ,545   | ,275 | 3,944   | 1  | ,047 | 1,725  | 1,007               | 2,956 |
|                     | VASTY2(3)  | -1,490 | ,467 | 10,197  | 1  | ,001 | ,225   | ,090                | ,562  |
|                     | VASTY2(4)  | ,138   | ,294 | ,220    | 1  | ,639 | 1,148  | ,645                | 2,043 |
|                     | VASTY2(5)  | -,194  | ,325 | ,357    | 1  | ,550 | ,823   | ,435                | 1,557 |
|                     | VASTY2(6)  | -1,287 | ,440 | 8,574   | 1  | ,003 | ,276   | ,117                | ,653  |
|                     | VASTY2(7)  | ,548   | ,277 | 3,911   | 1  | ,048 | 1,729  | 1,005               | 2,976 |
|                     | VASTY2(8)  | -,255  | ,320 | ,632    | 1  | ,427 | ,775   | ,414                | 1,452 |
|                     | VASTY2(9)  | ,267   | ,291 | ,842    | 1  | ,359 | 1,307  | ,738                | 2,313 |
|                     | VASTY2(10) | 1,026  | ,259 | 15,764  | 1  | ,000 | 2,791  | 1,682               | 4,632 |
|                     | VASTY2(11) | ,616   | ,273 | 5,109   | 1  | ,024 | 1,852  | 1,085               | 3,160 |
|                     | VASTY2(12) | ,122   | ,295 | ,171    | 1  | ,679 | 1,130  | ,634                | 2,013 |
|                     | VASTY2(13) | ,983   | ,261 | 14,230  | 1  | ,000 | 2,673  | 1,604               | 4,456 |
|                     | VASTY2(14) | -,248  | ,320 | ,597    | 1  | ,440 | ,781   | ,417                | 1,463 |
|                     | VASTY2(15) | ,247   | ,288 | ,731    | 1  | ,392 | 1,280  | ,727                | 2,253 |
|                     | VASTY2(16) | ,411   | ,331 | 1,546   | 1  | ,214 | 1,509  | ,789                | 2,887 |
|                     | VASTY2(17) | -1,079 | ,418 | 6,664   | 1  | ,010 | ,340   | ,150                | ,771  |
|                     | VASTY2(18) | -,668  | ,365 | 3,352   | 1  | ,067 | ,513   | ,251                | 1,048 |
|                     | VASTY2(19) | -1,638 | ,551 | 8,843   | 1  | ,003 | ,194   | ,066                | ,572  |
|                     | VASTY2(20) | ,040   | ,314 | ,016    | 1  | ,899 | 1,041  | ,562                | 1,928 |
|                     | VASTY2(21) | -,124  | ,312 | ,158    | 1  | ,691 | ,883   | ,479                | 1,628 |
|                     | VASTY2(22) | ,316   | ,291 | 1,183   | 1  | ,277 | 1,372  | ,776                | 2,426 |
|                     | VASTY2(23) | ,286   | ,288 | ,986    | 1  | ,321 | 1,331  | ,757                | 2,342 |

## Variables in the Equation

|            | B      | S.E. | Wald    | df | Sig. | Exp(B) | 95% C.I. for EXP(B) |       |
|------------|--------|------|---------|----|------|--------|---------------------|-------|
|            |        |      |         |    |      |        | Lower               | Upper |
| VASTY2(24) | ,263   | ,286 | ,847    | 1  | ,357 | 1,301  | ,743                | 2,280 |
| VASTY2(25) | ,300   | ,301 | ,996    | 1  | ,318 | 1,350  | ,749                | 2,435 |
| VASTY2(26) | -,945  | ,419 | 5,078   | 1  | ,024 | ,389   | ,171                | ,884  |
| VASTY2(27) | -1,461 | ,466 | 9,840   | 1  | ,002 | ,232   | ,093                | ,578  |
| VASTY2(28) | -1,012 | ,468 | 4,680   | 1  | ,031 | ,363   | ,145                | ,909  |
| VASTY2(29) | -1,039 | ,401 | 6,709   | 1  | ,010 | ,354   | ,161                | ,777  |
| VASTY2(30) | -,203  | ,316 | ,414    | 1  | ,520 | ,816   | ,439                | 1,516 |
| VASTY2(31) | ,499   | ,278 | 3,221   | 1  | ,073 | 1,648  | ,955                | 2,843 |
| VASTY2(32) | -,061  | ,313 | ,038    | 1  | ,845 | ,940   | ,509                | 1,737 |
| VASTY2(33) | ,012   | ,306 | ,002    | 1  | ,968 | 1,012  | ,556                | 1,843 |
| VASTY2(34) | -1,274 | ,439 | 8,429   | 1  | ,004 | ,280   | ,118                | ,661  |
| VASTY2(35) | ,650   | ,279 | 5,444   | 1  | ,020 | 1,915  | 1,110               | 3,307 |
| weekday    |        |      | 11,843  | 6  | ,066 |        |                     |       |
| weekday(1) | -,011  | ,129 | ,008    | 1  | ,929 | ,989   | ,767                | 1,274 |
| weekday(2) | -,033  | ,130 | ,066    | 1  | ,798 | ,967   | ,750                | 1,248 |
| weekday(3) | -,043  | ,130 | ,111    | 1  | ,740 | ,958   | ,742                | 1,237 |
| weekday(4) | ,042   | ,129 | ,107    | 1  | ,743 | 1,043  | ,810                | 1,343 |
| weekday(5) | -,225  | ,139 | 2,621   | 1  | ,105 | ,798   | ,608                | 1,049 |
| weekday(6) | -,361  | ,143 | 6,344   | 1  | ,012 | ,697   | ,526                | ,923  |
| holiday(1) | -,435  | ,253 | 2,966   | 1  | ,085 | ,647   | ,394                | 1,062 |
| season     |        |      | 3,733   | 4  | ,443 |        |                     |       |
| season(1)  | -,115  | ,113 | 1,020   | 1  | ,313 | ,892   | ,714                | 1,114 |
| season(2)  | -,110  | ,106 | 1,085   | 1  | ,298 | ,896   | ,728                | 1,102 |
| season(3)  | ,070   | ,108 | ,423    | 1  | ,516 | 1,073  | ,868                | 1,327 |
| season(4)  | -,073  | ,115 | ,405    | 1  | ,525 | ,929   | ,742                | 1,165 |
| Constant   | -2,497 | ,241 | 107,046 | 1  | ,000 | ,082   |                     |       |

a. Variable(s) entered on step 1: bv1, VASTY2, weekday, holiday, season.

```

LOGISTIC REGRESSION VARIABLES luonnelt1
/METHOD=ENTER bv2 VASTY2 weekday holiday season
/CONTRAST (bv2)=Indicator(1)
/CONTRAST (VASTY2)=Indicator(1)
/CONTRAST (weekday)=Indicator(1)
/CONTRAST (holiday)=Indicator(1)
/CONTRAST (season)=Indicator(1)
/PRINT=CI(95)
/CRITERIA=PIN(0.05) POUT(0.10) ITERATE(20) CUT(0.5).

```

**Block 1: Method = Enter**

## Omnibus Tests of Model Coefficients

|        |       | Chi-square | df | Sig. |
|--------|-------|------------|----|------|
| Step 1 | Step  | 336,814    | 48 | ,000 |
|        | Block | 336,814    | 48 | ,000 |
|        | Model | 336,814    | 48 | ,000 |

## Model Summary

| Step | -2 Log likelihood    | Cox & Snell R Square | Nagelkerke R Square |
|------|----------------------|----------------------|---------------------|
| 1    | 5860,06 <sup>a</sup> | ,027                 | ,068                |

a. Estimation terminated at iteration number 7 because parameter estimates changed by less than ,001.

Classification Table<sup>a</sup>

|                    |                                                   |                                                              | Predicted                                    |
|--------------------|---------------------------------------------------|--------------------------------------------------------------|----------------------------------------------|
|                    |                                                   |                                                              | luonnelt1<br>luonne<br>highest = ..          |
| Observed           |                                                   |                                                              | 0 ingen<br>händelse<br>eller läheltä<br>piti |
| Step 1             | luonnelt1 luonne highest = tapahtui<br>potilaalle | 0 ingen händelse eller läheltä piti<br>1 tapahtui potilaalle | 11627<br>848                                 |
| Overall Percentage |                                                   |                                                              |                                              |

Classification Table<sup>a</sup>

|                    |                                                   |                                                              | Predicted                            |
|--------------------|---------------------------------------------------|--------------------------------------------------------------|--------------------------------------|
|                    |                                                   |                                                              | luonnelt1<br>luonne<br>highest = ... |
| Observed           |                                                   |                                                              | 1 tapahtui<br>potilaalle             |
| Step 1             | luonnelt1 luonne highest = tapahtui<br>potilaalle | 0 ingen händelse eller läheltä piti<br>1 tapahtui potilaalle | 0<br>0                               |
| Overall Percentage |                                                   |                                                              |                                      |

Classification Table<sup>a</sup>

|                    |                                                |                                                              | Predicted          |
|--------------------|------------------------------------------------|--------------------------------------------------------------|--------------------|
|                    |                                                |                                                              |                    |
| Observed           |                                                |                                                              | Percentage Correct |
| Step 1             | luonnelt1 luonne highest = tapahtui potilaalle | 0 ingen händelse eller läheltä piti<br>1 tapahtui potilaalle | 100,0<br>,0        |
| Overall Percentage |                                                |                                                              | 93,2               |

a. The cut value is ,500

Variables in the Equation

|                     |            | B      | S.E. | Wald    | df | Sig. | Exp(B) | 95% C.I. for EXP(B) |       |
|---------------------|------------|--------|------|---------|----|------|--------|---------------------|-------|
|                     |            |        |      |         |    |      |        | Lower               | Upper |
| Step 1 <sup>a</sup> | bv2        |        |      | 5,271   | 2  | ,072 |        |                     |       |
|                     | bv2(1)     | -,148  | ,103 | 2,044   | 1  | ,153 | ,863   | ,705                | 1,056 |
|                     | bv2(2)     | ,066   | ,095 | ,481    | 1  | ,488 | 1,068  | ,887                | 1,285 |
|                     | VASTY2     |        |      | 240,171 | 35 | ,000 |        |                     |       |
|                     | VASTY2(1)  | ,086   | ,299 | ,082    | 1  | ,774 | 1,090  | ,606                | 1,960 |
|                     | VASTY2(2)  | ,550   | ,275 | 4,013   | 1  | ,045 | 1,734  | 1,012               | 2,970 |
|                     | VASTY2(3)  | -1,471 | ,466 | 9,950   | 1  | ,002 | ,230   | ,092                | ,573  |
|                     | VASTY2(4)  | ,148   | ,294 | ,255    | 1  | ,613 | 1,160  | ,652                | 2,063 |
|                     | VASTY2(5)  | -,194  | ,325 | ,355    | 1  | ,551 | ,824   | ,436                | 1,558 |
|                     | VASTY2(6)  | -1,277 | ,439 | 8,456   | 1  | ,004 | ,279   | ,118                | ,659  |
|                     | VASTY2(7)  | ,560   | ,276 | 4,130   | 1  | ,042 | 1,752  | 1,020               | 3,007 |
|                     | VASTY2(8)  | -,250  | ,320 | ,608    | 1  | ,436 | ,779   | ,416                | 1,459 |
|                     | VASTY2(9)  | ,270   | ,291 | ,856    | 1  | ,355 | 1,309  | ,740                | 2,318 |
|                     | VASTY2(10) | 1,036  | ,259 | 16,065  | 1  | ,000 | 2,819  | 1,698               | 4,679 |
|                     | VASTY2(11) | ,617   | ,272 | 5,122   | 1  | ,024 | 1,852  | 1,086               | 3,160 |
|                     | VASTY2(12) | ,129   | ,295 | ,193    | 1  | ,661 | 1,138  | ,639                | 2,029 |
|                     | VASTY2(13) | ,993   | ,261 | 14,512  | 1  | ,000 | 2,701  | 1,620               | 4,502 |
|                     | VASTY2(14) | -,245  | ,320 | ,587    | 1  | ,444 | ,782   | ,418                | 1,466 |
|                     | VASTY2(15) | ,246   | ,289 | ,728    | 1  | ,393 | 1,279  | ,727                | 2,253 |
|                     | VASTY2(16) | ,404   | ,331 | 1,490   | 1  | ,222 | 1,497  | ,783                | 2,862 |
|                     | VASTY2(17) | -1,083 | ,418 | 6,711   | 1  | ,010 | ,339   | ,149                | ,768  |
|                     | VASTY2(18) | -,677  | ,365 | 3,442   | 1  | ,064 | ,508   | ,249                | 1,039 |
|                     | VASTY2(19) | -1,706 | ,549 | 9,647   | 1  | ,002 | ,182   | ,062                | ,533  |
|                     | VASTY2(20) | ,046   | ,314 | ,021    | 1  | ,884 | 1,047  | ,566                | 1,938 |
|                     | VASTY2(21) | -,122  | ,312 | ,152    | 1  | ,697 | ,886   | ,480                | 1,632 |
|                     | VASTY2(22) | ,307   | ,291 | 1,111   | 1  | ,292 | 1,359  | ,768                | 2,404 |
|                     | VASTY2(23) | ,278   | ,288 | ,928    | 1  | ,335 | 1,320  | ,750                | 2,322 |

## Variables in the Equation

|            | B      | S.E. | Wald    | df | Sig. | Exp(B) | 95% C.I. for EXP(B) |       |
|------------|--------|------|---------|----|------|--------|---------------------|-------|
|            |        |      |         |    |      |        | Lower               | Upper |
| VASTY2(24) | ,280   | ,286 | ,955    | 1  | ,328 | 1,323  | ,755                | 2,317 |
| VASTY2(25) | ,300   | ,301 | ,995    | 1  | ,318 | 1,350  | ,749                | 2,435 |
| VASTY2(26) | -,945  | ,419 | 5,081   | 1  | ,024 | ,389   | ,171                | ,884  |
| VASTY2(27) | -1,460 | ,466 | 9,827   | 1  | ,002 | ,232   | ,093                | ,579  |
| VASTY2(28) | -1,008 | ,468 | 4,635   | 1  | ,031 | ,365   | ,146                | ,914  |
| VASTY2(29) | -1,028 | ,401 | 6,576   | 1  | ,010 | ,358   | ,163                | ,785  |
| VASTY2(30) | -,194  | ,316 | ,376    | 1  | ,540 | ,824   | ,444                | 1,530 |
| VASTY2(31) | ,490   | ,278 | 3,110   | 1  | ,078 | 1,632  | ,947                | 2,813 |
| VASTY2(32) | -,082  | ,312 | ,068    | 1  | ,794 | ,922   | ,500                | 1,700 |
| VASTY2(33) | -,002  | ,305 | ,000    | 1  | ,993 | ,998   | ,548                | 1,815 |
| VASTY2(34) | -1,268 | ,439 | 8,351   | 1  | ,004 | ,281   | ,119                | ,665  |
| VASTY2(35) | ,659   | ,278 | 5,637   | 1  | ,018 | 1,933  | 1,122               | 3,331 |
| weekday    |        |      | 12,024  | 6  | ,061 |        |                     |       |
| weekday(1) | -,007  | ,129 | ,003    | 1  | ,959 | ,993   | ,771                | 1,280 |
| weekday(2) | -,030  | ,130 | ,053    | 1  | ,818 | ,971   | ,752                | 1,252 |
| weekday(3) | -,041  | ,130 | ,097    | 1  | ,755 | ,960   | ,744                | 1,240 |
| weekday(4) | ,039   | ,129 | ,090    | 1  | ,764 | 1,039  | ,807                | 1,338 |
| weekday(5) | -,228  | ,139 | 2,691   | 1  | ,101 | ,796   | ,606                | 1,045 |
| weekday(6) | -,363  | ,144 | 6,400   | 1  | ,011 | ,695   | ,525                | ,921  |
| holiday(1) | -,438  | ,253 | 3,006   | 1  | ,083 | ,645   | ,393                | 1,059 |
| season     |        |      | 3,856   | 4  | ,426 |        |                     |       |
| season(1)  | -,115  | ,113 | 1,031   | 1  | ,310 | ,891   | ,714                | 1,113 |
| season(2)  | -,120  | ,106 | 1,285   | 1  | ,257 | ,887   | ,721                | 1,091 |
| season(3)  | ,066   | ,108 | ,370    | 1  | ,543 | 1,068  | ,864                | 1,321 |
| season(4)  | -,078  | ,115 | ,457    | 1  | ,499 | ,925   | ,738                | 1,159 |
| Constant   | -2,505 | ,246 | 103,317 | 1  | ,000 | ,082   |                     |       |

a. Variable(s) entered on step 1: bv2, VASTY2, weekday, holiday, season.

```

LOGISTIC REGRESSION VARIABLES luonnelt1
/METHOD=ENTER bv3 VASTY2 weekday holiday season
/CONTRAST (bv3)=Indicator(1)
/CONTRAST (VASTY2)=Indicator(1)
/CONTRAST (weekday)=Indicator(1)
/CONTRAST (holiday)=Indicator(1)
/CONTRAST (season)=Indicator(1)
/PRINT=CI(95)
/CRITERIA=PIN(0.05) POUT(0.10) ITERATE(20) CUT(0.5).

```

**Block 1: Method = Enter**

**Omnibus Tests of Model Coefficients**

|        |       | Chi-square | df | Sig. |
|--------|-------|------------|----|------|
| Step 1 | Step  | 337,695    | 48 | ,000 |
|        | Block | 337,695    | 48 | ,000 |
|        | Model | 337,695    | 48 | ,000 |

**Model Summary**

| Step | -2 Log likelihood    | Cox & Snell R Square | Nagelkerke R Square |
|------|----------------------|----------------------|---------------------|
| 1    | 5859,18 <sup>a</sup> | ,027                 | ,068                |

a. Estimation terminated at iteration number 7 because parameter estimates changed by less than ,001.

**Classification Table<sup>a</sup>**

|                    |                                                |                                                              | Predicted                                    |
|--------------------|------------------------------------------------|--------------------------------------------------------------|----------------------------------------------|
|                    |                                                |                                                              | luonnelt1<br>luonne<br>highest = ..          |
| Observed           |                                                |                                                              | 0 ingen<br>händelse<br>eller läheltä<br>piti |
| Step 1             | luonnelt1 luonne highest = tapahtui potilaalle | 0 ingen händelse eller läheltä piti<br>1 tapahtui potilaalle | 11627<br>848                                 |
| Overall Percentage |                                                |                                                              |                                              |

**Classification Table<sup>a</sup>**

|                    |                                                |                                                              | Predicted                            |
|--------------------|------------------------------------------------|--------------------------------------------------------------|--------------------------------------|
|                    |                                                |                                                              | luonnelt1<br>luonne<br>highest = ... |
| Observed           |                                                |                                                              | 1 tapahtui<br>potilaalle             |
| Step 1             | luonnelt1 luonne highest = tapahtui potilaalle | 0 ingen händelse eller läheltä piti<br>1 tapahtui potilaalle | 0<br>0                               |
| Overall Percentage |                                                |                                                              |                                      |



Classification Table<sup>a</sup>

|                    |                                                |                                                              | Predicted          |
|--------------------|------------------------------------------------|--------------------------------------------------------------|--------------------|
|                    |                                                |                                                              |                    |
| Observed           |                                                |                                                              | Percentage Correct |
| Step 1             | luonnelt1 luonne highest = tapahtui potilaalle | 0 ingen händelse eller läheltä piti<br>1 tapahtui potilaalle | 100,0<br>,0        |
| Overall Percentage |                                                |                                                              | 93,2               |

a. The cut value is ,500

Variables in the Equation

|                     |            | B      | S.E. | Wald    | df | Sig. | Exp(B) | 95% C.I. for EXP(B) |       |
|---------------------|------------|--------|------|---------|----|------|--------|---------------------|-------|
|                     |            |        |      |         |    |      |        | Lower               | Upper |
| Step 1 <sup>a</sup> | bv3        |        |      | 5,945   | 2  | ,051 |        |                     |       |
|                     | bv3(1)     | -,292  | ,141 | 4,310   | 1  | ,038 | ,746   | ,566                | ,984  |
|                     | bv3(2)     | ,107   | ,104 | 1,059   | 1  | ,303 | 1,113  | ,907                | 1,366 |
|                     | VASTY2     |        |      | 242,042 | 35 | ,000 |        |                     |       |
|                     | VASTY2(1)  | ,118   | ,299 | ,156    | 1  | ,693 | 1,126  | ,626                | 2,025 |
|                     | VASTY2(2)  | ,566   | ,274 | 4,258   | 1  | ,039 | 1,762  | 1,029               | 3,017 |
|                     | VASTY2(3)  | -1,454 | ,466 | 9,719   | 1  | ,002 | ,234   | ,094                | ,583  |
|                     | VASTY2(4)  | ,163   | ,294 | ,307    | 1  | ,579 | 1,177  | ,662                | 2,094 |
|                     | VASTY2(5)  | -,175  | ,325 | ,290    | 1  | ,590 | ,839   | ,444                | 1,587 |
|                     | VASTY2(6)  | -1,266 | ,440 | 8,299   | 1  | ,004 | ,282   | ,119                | ,667  |
|                     | VASTY2(7)  | ,567   | ,279 | 4,136   | 1  | ,042 | 1,763  | 1,021               | 3,046 |
|                     | VASTY2(8)  | -,223  | ,320 | ,489    | 1  | ,485 | ,800   | ,427                | 1,497 |
|                     | VASTY2(9)  | ,297   | ,291 | 1,040   | 1  | ,308 | 1,345  | ,761                | 2,379 |
|                     | VASTY2(10) | 1,055  | ,258 | 16,714  | 1  | ,000 | 2,872  | 1,732               | 4,763 |
|                     | VASTY2(11) | ,631   | ,272 | 5,363   | 1  | ,021 | 1,879  | 1,102               | 3,206 |
|                     | VASTY2(12) | ,154   | ,294 | ,274    | 1  | ,601 | 1,166  | ,655                | 2,077 |
|                     | VASTY2(13) | 1,034  | ,259 | 15,951  | 1  | ,000 | 2,813  | 1,693               | 4,673 |
|                     | VASTY2(14) | -,222  | ,320 | ,481    | 1  | ,488 | ,801   | ,428                | 1,500 |
|                     | VASTY2(15) | ,271   | ,288 | ,886    | 1  | ,347 | 1,312  | ,746                | 2,307 |
|                     | VASTY2(16) | ,411   | ,332 | 1,537   | 1  | ,215 | 1,509  | ,787                | 2,891 |
|                     | VASTY2(17) | -1,091 | ,418 | 6,822   | 1  | ,009 | ,336   | ,148                | ,762  |
|                     | VASTY2(18) | -,669  | ,365 | 3,356   | 1  | ,067 | ,512   | ,251                | 1,048 |
|                     | VASTY2(19) | -1,634 | ,553 | 8,739   | 1  | ,003 | ,195   | ,066                | ,577  |
|                     | VASTY2(20) | ,059   | ,315 | ,036    | 1  | ,850 | 1,061  | ,573                | 1,966 |
|                     | VASTY2(21) | -,108  | ,312 | ,120    | 1  | ,729 | ,898   | ,487                | 1,654 |
|                     | VASTY2(22) | ,280   | ,290 | ,933    | 1  | ,334 | 1,324  | ,749                | 2,338 |
|                     | VASTY2(23) | ,286   | ,288 | ,986    | 1  | ,321 | 1,331  | ,757                | 2,342 |

## Variables in the Equation

|            | B      | S.E. | Wald    | df | Sig. | Exp(B) | 95% C.I. for EXP(B) |       |
|------------|--------|------|---------|----|------|--------|---------------------|-------|
|            |        |      |         |    |      |        | Lower               | Upper |
| VASTY2(24) | ,290   | ,286 | 1,029   | 1  | ,310 | 1,336  | ,763                | 2,340 |
| VASTY2(25) | ,314   | ,301 | 1,086   | 1  | ,297 | 1,369  | ,759                | 2,470 |
| VASTY2(26) | -,920  | ,419 | 4,817   | 1  | ,028 | ,399   | ,175                | ,906  |
| VASTY2(27) | -1,430 | ,465 | 9,449   | 1  | ,002 | ,239   | ,096                | ,595  |
| VASTY2(28) | -,969  | ,468 | 4,300   | 1  | ,038 | ,379   | ,152                | ,948  |
| VASTY2(29) | -1,025 | ,401 | 6,538   | 1  | ,011 | ,359   | ,164                | ,787  |
| VASTY2(30) | -,196  | ,316 | ,384    | 1  | ,535 | ,822   | ,443                | 1,527 |
| VASTY2(31) | ,520   | ,279 | 3,467   | 1  | ,063 | 1,682  | ,973                | 2,908 |
| VASTY2(32) | -,043  | ,314 | ,018    | 1  | ,892 | ,958   | ,518                | 1,774 |
| VASTY2(33) | ,035   | ,307 | ,013    | 1  | ,909 | 1,036  | ,568                | 1,889 |
| VASTY2(34) | -1,262 | ,439 | 8,285   | 1  | ,004 | ,283   | ,120                | ,668  |
| VASTY2(35) | ,670   | ,279 | 5,760   | 1  | ,016 | 1,953  | 1,131               | 3,375 |
| weekday    |        |      | 12,001  | 6  | ,062 |        |                     |       |
| weekday(1) | -,011  | ,129 | ,007    | 1  | ,932 | ,989   | ,768                | 1,274 |
| weekday(2) | -,037  | ,130 | ,083    | 1  | ,773 | ,963   | ,747                | 1,243 |
| weekday(3) | -,048  | ,130 | ,134    | 1  | ,715 | ,953   | ,738                | 1,231 |
| weekday(4) | ,035   | ,129 | ,072    | 1  | ,788 | 1,035  | ,804                | 1,333 |
| weekday(5) | -,238  | ,139 | 2,932   | 1  | ,087 | ,788   | ,600                | 1,035 |
| weekday(6) | -,363  | ,144 | 6,396   | 1  | ,011 | ,696   | ,525                | ,922  |
| holiday(1) | -,441  | ,253 | 3,048   | 1  | ,081 | ,643   | ,392                | 1,056 |
| season     |        |      | 3,977   | 4  | ,409 |        |                     |       |
| season(1)  | -,115  | ,113 | 1,032   | 1  | ,310 | ,891   | ,714                | 1,113 |
| season(2)  | -,123  | ,106 | 1,350   | 1  | ,245 | ,885   | ,719                | 1,088 |
| season(3)  | ,067   | ,108 | ,388    | 1  | ,533 | 1,070  | ,865                | 1,323 |
| season(4)  | -,077  | ,115 | ,444    | 1  | ,505 | ,926   | ,739                | 1,161 |
| Constant   | -2,524 | ,240 | 110,913 | 1  | ,000 | ,080   |                     |       |

a. Variable(s) entered on step 1: bv3, VASTY2, weekday, holiday, season.

```

LOGISTIC REGRESSION VARIABLES luonnelt1
/METHOD=ENTER sv3 VASTY2 weekday holiday season
/CONTRAST (sv3)=Indicator(1)
/CONTRAST (VASTY2)=Indicator(1)
/CONTRAST (weekday)=Indicator(1)
/CONTRAST (holiday)=Indicator(1)
/CONTRAST (season)=Indicator(1)
/PRINT=CI(95)
/CRITERIA=PIN(0.05) POUT(0.10) ITERATE(20) CUT(0.5).

```

**Block 1: Method = Enter**

## Omnibus Tests of Model Coefficients

|        |       | Chi-square | df | Sig. |
|--------|-------|------------|----|------|
| Step 1 | Step  | 333,765    | 48 | ,000 |
|        | Block | 333,765    | 48 | ,000 |
|        | Model | 333,765    | 48 | ,000 |

## Model Summary

| Step | -2 Log likelihood    | Cox & Snell R Square | Nagelkerke R Square |
|------|----------------------|----------------------|---------------------|
| 1    | 5863,11 <sup>a</sup> | ,026                 | ,067                |

a. Estimation terminated at iteration number 7 because parameter estimates changed by less than ,001.

Classification Table<sup>a</sup>

|                    |                                                |                                                              | Predicted                                    |
|--------------------|------------------------------------------------|--------------------------------------------------------------|----------------------------------------------|
|                    |                                                |                                                              | luonnelt1<br>luonne<br>highest = ..          |
| Observed           |                                                |                                                              | 0 ingen<br>händelse<br>eller läheltä<br>piti |
| Step 1             | luonnelt1 luonne highest = tapahtui potilaalle | 0 ingen händelse eller läheltä piti<br>1 tapahtui potilaalle | 11627<br>848                                 |
| Overall Percentage |                                                |                                                              |                                              |

Classification Table<sup>a</sup>

|                    |                                                |                                                              | Predicted                            |
|--------------------|------------------------------------------------|--------------------------------------------------------------|--------------------------------------|
|                    |                                                |                                                              | luonnelt1<br>luonne<br>highest = ... |
| Observed           |                                                |                                                              | 1 tapahtui<br>potilaalle             |
| Step 1             | luonnelt1 luonne highest = tapahtui potilaalle | 0 ingen händelse eller läheltä piti<br>1 tapahtui potilaalle | 0<br>0                               |
| Overall Percentage |                                                |                                                              |                                      |

Classification Table<sup>a</sup>

|                    |                                                |                                                              | Predicted          |
|--------------------|------------------------------------------------|--------------------------------------------------------------|--------------------|
|                    |                                                |                                                              |                    |
| Observed           |                                                |                                                              | Percentage Correct |
| Step 1             | luonnelt1 luonne highest = tapahtui potilaalle | 0 ingen händelse eller läheltä piti<br>1 tapahtui potilaalle | 100,0<br>,0        |
| Overall Percentage |                                                |                                                              | 93,2               |

a. The cut value is ,500

Variables in the Equation

|                     |            | B      | S.E. | Wald    | df | Sig. | Exp(B) | 95% C.I. for EXP(B) |       |
|---------------------|------------|--------|------|---------|----|------|--------|---------------------|-------|
|                     |            |        |      |         |    |      |        | Lower               | Upper |
| Step 1 <sup>a</sup> | sv3        |        |      | 2,302   | 2  | ,316 |        |                     |       |
|                     | sv3(1)     | -,017  | ,107 | ,026    | 1  | ,873 | ,983   | ,797                | 1,212 |
|                     | sv3(2)     | ,137   | ,104 | 1,734   | 1  | ,188 | 1,146  | ,935                | 1,405 |
|                     | VASTY2     |        |      | 233,198 | 35 | ,000 |        |                     |       |
|                     | VASTY2(1)  | ,063   | ,300 | ,044    | 1  | ,834 | 1,065  | ,591                | 1,918 |
|                     | VASTY2(2)  | ,506   | ,278 | 3,304   | 1  | ,069 | 1,659  | ,961                | 2,863 |
|                     | VASTY2(3)  | -1,377 | ,465 | 8,767   | 1  | ,003 | ,252   | ,101                | ,628  |
|                     | VASTY2(4)  | ,216   | ,292 | ,548    | 1  | ,459 | 1,242  | ,700                | 2,202 |
|                     | VASTY2(5)  | -,127  | ,326 | ,152    | 1  | ,696 | ,880   | ,464                | 1,669 |
|                     | VASTY2(6)  | -1,326 | ,443 | 8,975   | 1  | ,003 | ,266   | ,112                | ,632  |
|                     | VASTY2(7)  | ,655   | ,272 | 5,778   | 1  | ,016 | 1,925  | 1,128               | 3,283 |
|                     | VASTY2(8)  | -,172  | ,320 | ,287    | 1  | ,592 | ,842   | ,449                | 1,578 |
|                     | VASTY2(9)  | ,316   | ,290 | 1,185   | 1  | ,276 | 1,372  | ,776                | 2,424 |
|                     | VASTY2(10) | ,992   | ,264 | 14,138  | 1  | ,000 | 2,697  | 1,608               | 4,523 |
|                     | VASTY2(11) | ,633   | ,272 | 5,405   | 1  | ,020 | 1,883  | 1,104               | 3,211 |
|                     | VASTY2(12) | ,103   | ,298 | ,120    | 1  | ,729 | 1,109  | ,618                | 1,987 |
|                     | VASTY2(13) | ,984   | ,265 | 13,793  | 1  | ,000 | 2,676  | 1,592               | 4,498 |
|                     | VASTY2(14) | -,254  | ,321 | ,625    | 1  | ,429 | ,776   | ,413                | 1,456 |
|                     | VASTY2(15) | ,211   | ,292 | ,521    | 1  | ,470 | 1,235  | ,696                | 2,190 |
|                     | VASTY2(16) | ,385   | ,331 | 1,351   | 1  | ,245 | 1,469  | ,768                | 2,811 |
|                     | VASTY2(17) | -1,089 | ,418 | 6,776   | 1  | ,009 | ,337   | ,148                | ,764  |
|                     | VASTY2(18) | -,626  | ,371 | 2,847   | 1  | ,092 | ,535   | ,258                | 1,106 |
|                     | VASTY2(19) | -1,757 | ,552 | 10,144  | 1  | ,001 | ,173   | ,059                | ,509  |
|                     | VASTY2(20) | ,033   | ,315 | ,011    | 1  | ,915 | 1,034  | ,558                | 1,917 |
|                     | VASTY2(21) | -,079  | ,312 | ,063    | 1  | ,801 | ,924   | ,501                | 1,704 |
|                     | VASTY2(22) | ,247   | ,290 | ,727    | 1  | ,394 | 1,280  | ,725                | 2,260 |
|                     | VASTY2(23) | ,278   | ,288 | ,933    | 1  | ,334 | 1,321  | ,751                | 2,324 |

## Variables in the Equation

|            | B      | S.E. | Wald    | df | Sig. | Exp(B) | 95% C.I. for EXP(B) |       |
|------------|--------|------|---------|----|------|--------|---------------------|-------|
|            |        |      |         |    |      |        | Lower               | Upper |
| VASTY2(24) | ,307   | ,285 | 1,157   | 1  | ,282 | 1,359  | ,777                | 2,376 |
| VASTY2(25) | ,318   | ,302 | 1,111   | 1  | ,292 | 1,375  | ,761                | 2,484 |
| VASTY2(26) | -,922  | ,419 | 4,848   | 1  | ,028 | ,398   | ,175                | ,904  |
| VASTY2(27) | -1,475 | ,467 | 9,986   | 1  | ,002 | ,229   | ,092                | ,571  |
| VASTY2(28) | -1,043 | ,472 | 4,893   | 1  | ,027 | ,352   | ,140                | ,888  |
| VASTY2(29) | -1,106 | ,407 | 7,398   | 1  | ,007 | ,331   | ,149                | ,734  |
| VASTY2(30) | -,146  | ,317 | ,212    | 1  | ,645 | ,864   | ,465                | 1,608 |
| VASTY2(31) | ,541   | ,284 | 3,632   | 1  | ,057 | 1,718  | ,985                | 2,997 |
| VASTY2(32) | -,055  | ,320 | ,030    | 1  | ,863 | ,946   | ,505                | 1,772 |
| VASTY2(33) | ,034   | ,313 | ,012    | 1  | ,913 | 1,035  | ,560                | 1,913 |
| VASTY2(34) | -1,254 | ,439 | 8,181   | 1  | ,004 | ,285   | ,121                | ,674  |
| VASTY2(35) | ,688   | ,276 | 6,204   | 1  | ,013 | 1,991  | 1,158               | 3,422 |
| weekday    |        |      | 13,128  | 6  | ,041 |        |                     |       |
| weekday(1) | -,007  | ,129 | ,003    | 1  | ,958 | ,993   | ,771                | 1,279 |
| weekday(2) | -,028  | ,130 | ,047    | 1  | ,828 | ,972   | ,753                | 1,254 |
| weekday(3) | -,039  | ,131 | ,087    | 1  | ,768 | ,962   | ,745                | 1,243 |
| weekday(4) | ,042   | ,129 | ,108    | 1  | ,743 | 1,043  | ,810                | 1,344 |
| weekday(5) | -,239  | ,139 | 2,932   | 1  | ,087 | ,788   | ,599                | 1,035 |
| weekday(6) | -,376  | ,143 | 6,871   | 1  | ,009 | ,687   | ,518                | ,910  |
| holiday(1) | -,451  | ,253 | 3,175   | 1  | ,075 | ,637   | ,388                | 1,046 |
| season     |        |      | 4,327   | 4  | ,364 |        |                     |       |
| season(1)  | -,120  | ,113 | 1,130   | 1  | ,288 | ,886   | ,710                | 1,107 |
| season(2)  | -,137  | ,106 | 1,687   | 1  | ,194 | ,872   | ,709                | 1,072 |
| season(3)  | ,061   | ,108 | ,322    | 1  | ,570 | 1,063  | ,860                | 1,315 |
| season(4)  | -,084  | ,115 | ,537    | 1  | ,463 | ,919   | ,734                | 1,152 |
| Constant   | -2,572 | ,244 | 110,717 | 1  | ,000 | ,076   |                     |       |

a. Variable(s) entered on step 1: sv3, VASTY2, weekday, holiday, season.

```

LOGISTIC REGRESSION VARIABLES luonnelt1
/METHOD=ENTER sv5 VASTY2 weekday holiday season
/CONTRAST (sv5)=Indicator(1)
/CONTRAST (VASTY2)=Indicator(1)
/CONTRAST (weekday)=Indicator(1)
/CONTRAST (holiday)=Indicator(1)
/CONTRAST (season)=Indicator(1)
/PRINT=CI(95)
/CRITERIA=PIN(0.05) POUT(0.10) ITERATE(20) CUT(0.5).

```

**Block 1: Method = Enter**

## Omnibus Tests of Model Coefficients

|        |       | Chi-square | df | Sig. |
|--------|-------|------------|----|------|
| Step 1 | Step  | 334,570    | 50 | ,000 |
|        | Block | 334,570    | 50 | ,000 |
|        | Model | 334,570    | 50 | ,000 |

## Model Summary

| Step | -2 Log likelihood    | Cox & Snell R Square | Nagelkerke R Square |
|------|----------------------|----------------------|---------------------|
| 1    | 5862,30 <sup>a</sup> | ,026                 | ,068                |

a. Estimation terminated at iteration number 7 because parameter estimates changed by less than ,001.

Classification Table<sup>a</sup>

|                    |                                                   |                                                              | Predicted                                    |
|--------------------|---------------------------------------------------|--------------------------------------------------------------|----------------------------------------------|
|                    |                                                   |                                                              | luonnelt1<br>luonne<br>highest = ..          |
| Observed           |                                                   |                                                              | 0 ingen<br>händelse<br>eller läheltä<br>piti |
| Step 1             | luonnelt1 luonne highest = tapahtui<br>potilaalle | 0 ingen händelse eller läheltä piti<br>1 tapahtui potilaalle | 11627<br>848                                 |
| Overall Percentage |                                                   |                                                              |                                              |

Classification Table<sup>a</sup>

|                    |                                                   |                                                              | Predicted                            |
|--------------------|---------------------------------------------------|--------------------------------------------------------------|--------------------------------------|
|                    |                                                   |                                                              | luonnelt1<br>luonne<br>highest = ... |
| Observed           |                                                   |                                                              | 1 tapahtui<br>potilaalle             |
| Step 1             | luonnelt1 luonne highest = tapahtui<br>potilaalle | 0 ingen händelse eller läheltä piti<br>1 tapahtui potilaalle | 0<br>0                               |
| Overall Percentage |                                                   |                                                              |                                      |

Classification Table<sup>a</sup>

|                    |                                                |                                                              | Predicted          |
|--------------------|------------------------------------------------|--------------------------------------------------------------|--------------------|
|                    |                                                |                                                              |                    |
| Observed           |                                                |                                                              | Percentage Correct |
| Step 1             | luonnelt1 luonne highest = tapahtui potilaalle | 0 ingen händelse eller läheltä piti<br>1 tapahtui potilaalle | 100,0<br>,0        |
| Overall Percentage |                                                |                                                              | 93,2               |

a. The cut value is ,500

Variables in the Equation

|                     |            | B      | S.E. | Wald    | df | Sig. | Exp(B) | 95% C.I. for EXP(B) |       |
|---------------------|------------|--------|------|---------|----|------|--------|---------------------|-------|
|                     |            |        |      |         |    |      |        | Lower               | Upper |
| Step 1 <sup>a</sup> | sv5        |        |      | 3,122   | 4  | ,538 |        |                     |       |
|                     | sv5(1)     | -,028  | ,135 | ,043    | 1  | ,835 | ,972   | ,747                | 1,266 |
|                     | sv5(2)     | -,011  | ,137 | ,007    | 1  | ,934 | ,989   | ,757                | 1,292 |
|                     | sv5(3)     | -,003  | ,125 | ,001    | 1  | ,980 | ,997   | ,781                | 1,273 |
|                     | sv5(4)     | ,179   | ,135 | 1,765   | 1  | ,184 | 1,196  | ,918                | 1,557 |
|                     | VASTY2     |        |      | 233,751 | 35 | ,000 |        |                     |       |
|                     | VASTY2(1)  | ,060   | ,300 | ,040    | 1  | ,842 | 1,062  | ,589                | 1,913 |
|                     | VASTY2(2)  | ,480   | ,281 | 2,925   | 1  | ,087 | 1,616  | ,932                | 2,802 |
|                     | VASTY2(3)  | -1,387 | ,465 | 8,894   | 1  | ,003 | ,250   | ,100                | ,622  |
|                     | VASTY2(4)  | ,215   | ,292 | ,542    | 1  | ,462 | 1,240  | ,699                | 2,199 |
|                     | VASTY2(5)  | -,146  | ,327 | ,199    | 1  | ,656 | ,865   | ,456                | 1,640 |
|                     | VASTY2(6)  | -1,377 | ,446 | 9,521   | 1  | ,002 | ,252   | ,105                | ,605  |
|                     | VASTY2(7)  | ,652   | ,272 | 5,729   | 1  | ,017 | 1,919  | 1,125               | 3,273 |
|                     | VASTY2(8)  | -,189  | ,321 | ,349    | 1  | ,555 | ,827   | ,441                | 1,552 |
|                     | VASTY2(9)  | ,320   | ,290 | 1,217   | 1  | ,270 | 1,378  | ,780                | 2,434 |
|                     | VASTY2(10) | ,961   | ,267 | 12,923  | 1  | ,000 | 2,613  | 1,548               | 4,412 |
|                     | VASTY2(11) | ,627   | ,272 | 5,308   | 1  | ,021 | 1,873  | 1,098               | 3,193 |
|                     | VASTY2(12) | ,095   | ,299 | ,102    | 1  | ,750 | 1,100  | ,613                | 1,975 |
|                     | VASTY2(13) | ,951   | ,269 | 12,512  | 1  | ,000 | 2,588  | 1,528               | 4,384 |
|                     | VASTY2(14) | -,270  | ,322 | ,700    | 1  | ,403 | ,764   | ,406                | 1,436 |
|                     | VASTY2(15) | ,189   | ,294 | ,412    | 1  | ,521 | 1,208  | ,679                | 2,150 |
|                     | VASTY2(16) | ,361   | ,332 | 1,179   | 1  | ,278 | 1,434  | ,748                | 2,750 |
|                     | VASTY2(17) | -1,100 | ,418 | 6,919   | 1  | ,009 | ,333   | ,147                | ,755  |
|                     | VASTY2(18) | -,643  | ,376 | 2,934   | 1  | ,087 | ,525   | ,252                | 1,097 |
|                     | VASTY2(19) | -1,774 | ,555 | 10,209  | 1  | ,001 | ,170   | ,057                | ,504  |
|                     | VASTY2(20) | ,004   | ,317 | ,000    | 1  | ,991 | 1,004  | ,539                | 1,867 |
|                     | VASTY2(21) | -,089  | ,312 | ,082    | 1  | ,774 | ,914   | ,496                | 1,686 |

## Variables in the Equation

|            | B      | S.E. | Wald    | df | Sig. | Exp(B) | 95% C.I. for EXP(B) |       |
|------------|--------|------|---------|----|------|--------|---------------------|-------|
|            |        |      |         |    |      |        | Lower               | Upper |
| VASTY2(22) | ,245   | ,290 | ,713    | 1  | ,398 | 1,277  | ,724                | 2,255 |
| VASTY2(23) | ,270   | ,288 | ,877    | 1  | ,349 | 1,310  | ,744                | 2,306 |
| VASTY2(24) | ,296   | ,285 | 1,075   | 1  | ,300 | 1,344  | ,768                | 2,353 |
| VASTY2(25) | ,300   | ,302 | ,982    | 1  | ,322 | 1,349  | ,746                | 2,440 |
| VASTY2(26) | -,924  | ,419 | 4,862   | 1  | ,027 | ,397   | ,175                | ,902  |
| VASTY2(27) | -1,495 | ,468 | 10,220  | 1  | ,001 | ,224   | ,090                | ,561  |
| VASTY2(28) | -1,107 | ,477 | 5,401   | 1  | ,020 | ,330   | ,130                | ,841  |
| VASTY2(29) | -1,174 | ,413 | 8,084   | 1  | ,004 | ,309   | ,138                | ,694  |
| VASTY2(30) | -,156  | ,317 | ,242    | 1  | ,623 | ,856   | ,460                | 1,592 |
| VASTY2(31) | ,522   | ,287 | 3,313   | 1  | ,069 | 1,686  | ,961                | 2,958 |
| VASTY2(32) | -,072  | ,325 | ,050    | 1  | ,823 | ,930   | ,492                | 1,758 |
| VASTY2(33) | ,018   | ,319 | ,003    | 1  | ,956 | 1,018  | ,544                | 1,903 |
| VASTY2(34) | -1,257 | ,439 | 8,215   | 1  | ,004 | ,285   | ,120                | ,672  |
| VASTY2(35) | ,692   | ,277 | 6,254   | 1  | ,012 | 1,998  | 1,161               | 3,436 |
| weekday    |        |      | 13,104  | 6  | ,041 |        |                     |       |
| weekday(1) | -,004  | ,129 | ,001    | 1  | ,976 | ,996   | ,773                | 1,283 |
| weekday(2) | -,027  | ,130 | ,043    | 1  | ,836 | ,973   | ,754                | 1,256 |
| weekday(3) | -,040  | ,131 | ,095    | 1  | ,758 | ,961   | ,744                | 1,241 |
| weekday(4) | ,043   | ,129 | ,111    | 1  | ,739 | 1,044  | ,810                | 1,345 |
| weekday(5) | -,236  | ,140 | 2,854   | 1  | ,091 | ,790   | ,601                | 1,038 |
| weekday(6) | -,376  | ,144 | 6,879   | 1  | ,009 | ,686   | ,518                | ,909  |
| holiday(1) | -,454  | ,253 | 3,218   | 1  | ,073 | ,635   | ,387                | 1,043 |
| season     |        |      | 4,099   | 4  | ,393 |        |                     |       |
| season(1)  | -,118  | ,113 | 1,091   | 1  | ,296 | ,888   | ,711                | 1,109 |
| season(2)  | -,135  | ,106 | 1,613   | 1  | ,204 | ,874   | ,710                | 1,076 |
| season(3)  | ,059   | ,108 | ,301    | 1  | ,583 | 1,061  | ,858                | 1,312 |
| season(4)  | -,080  | ,115 | ,486    | 1  | ,486 | ,923   | ,736                | 1,156 |
| Constant   | -2,546 | ,252 | 102,291 | 1  | ,000 | ,078   |                     |       |

a. Variable(s) entered on step 1: sv5, VASTY2, weekday, holiday, season.

```

LOGISTIC REGRESSION VARIABLES luonne1t1
/METHOD=ENTER sv7 VASTY2 weekday holiday season
/CONTRAST (sv7)=Indicator(1)
/CONTRAST (VASTY2)=Indicator(1)
/CONTRAST (weekday)=Indicator(1)
/CONTRAST (holiday)=Indicator(1)
/CONTRAST (season)=Indicator(1)
/PRINT=CI(95)

```



/CRITERIA=PIN(0.05) POUT(0.10) ITERATE(20) CUT(0.5).

## Block 1: Method = Enter

### Omnibus Tests of Model Coefficients

|        |       | Chi-square | df | Sig. |
|--------|-------|------------|----|------|
| Step 1 | Step  | 336,551    | 52 | ,000 |
|        | Block | 336,551    | 52 | ,000 |
|        | Model | 336,551    | 52 | ,000 |

### Model Summary

| Step | -2 Log likelihood    | Cox & Snell R Square | Nagelkerke R Square |
|------|----------------------|----------------------|---------------------|
| 1    | 5860,32 <sup>a</sup> | ,027                 | ,068                |

a. Estimation terminated at iteration number 7 because parameter estimates changed by less than ,001.

Classification Table<sup>a</sup>

|                    |                                                | Predicted                                                    |                                     |
|--------------------|------------------------------------------------|--------------------------------------------------------------|-------------------------------------|
|                    |                                                | luonnelt1 luonne highest = ...                               | 0 ingen händelse eller läheltä piti |
|                    | Observed                                       |                                                              |                                     |
| Step 1             | luonnelt1 luonne highest = tapahtui potilaalle | 0 ingen händelse eller läheltä piti<br>1 tapahtui potilaalle | 11627<br>848                        |
| Overall Percentage |                                                |                                                              |                                     |

Classification Table<sup>a</sup>

|                    |                                                | Predicted                                                    |                       |
|--------------------|------------------------------------------------|--------------------------------------------------------------|-----------------------|
|                    |                                                | luonnelt1 luonne highest = ...                               | 1 tapahtui potilaalle |
|                    | Observed                                       |                                                              |                       |
| Step 1             | luonnelt1 luonne highest = tapahtui potilaalle | 0 ingen händelse eller läheltä piti<br>1 tapahtui potilaalle | 0<br>0                |
| Overall Percentage |                                                |                                                              |                       |

Classification Table<sup>a</sup>

|                    |                                                |                                                              | Predicted          |
|--------------------|------------------------------------------------|--------------------------------------------------------------|--------------------|
|                    |                                                |                                                              |                    |
| Observed           |                                                |                                                              | Percentage Correct |
| Step 1             | luonnelt1 luonne highest = tapahtui potilaalle | 0 ingen händelse eller läheltä piti<br>1 tapahtui potilaalle | 100,0<br>,0        |
| Overall Percentage |                                                |                                                              | 93,2               |

a. The cut value is ,500

Variables in the Equation

|                     |            | B      | S.E. | Wald    | df | Sig. | Exp(B) | 95% C.I. for EXP(B) |       |
|---------------------|------------|--------|------|---------|----|------|--------|---------------------|-------|
|                     |            |        |      |         |    |      |        | Lower               | Upper |
| Step 1 <sup>a</sup> | sv7        |        |      | 5,111   | 6  | ,530 |        |                     |       |
|                     | sv7(1)     | -,176  | ,153 | 1,330   | 1  | ,249 | ,838   | ,622                | 1,131 |
|                     | sv7(2)     | -,069  | ,158 | ,189    | 1  | ,663 | ,933   | ,684                | 1,273 |
|                     | sv7(3)     | -,100  | ,156 | ,408    | 1  | ,523 | ,905   | ,666                | 1,229 |
|                     | sv7(4)     | -,068  | ,147 | ,215    | 1  | ,643 | ,934   | ,701                | 1,245 |
|                     | sv7(5)     | -,032  | ,139 | ,052    | 1  | ,819 | ,969   | ,738                | 1,272 |
|                     | sv7(6)     | ,172   | ,155 | 1,227   | 1  | ,268 | 1,187  | ,876                | 1,609 |
|                     | VASTY2     |        |      | 233,612 | 35 | ,000 |        |                     |       |
|                     | VASTY2(1)  | ,073   | ,301 | ,059    | 1  | ,808 | 1,076  | ,597                | 1,940 |
|                     | VASTY2(2)  | ,473   | ,281 | 2,830   | 1  | ,093 | 1,605  | ,925                | 2,785 |
|                     | VASTY2(3)  | -1,392 | ,465 | 8,962   | 1  | ,003 | ,249   | ,100                | ,618  |
|                     | VASTY2(4)  | ,216   | ,293 | ,547    | 1  | ,459 | 1,242  | ,700                | 2,203 |
|                     | VASTY2(5)  | -,128  | ,327 | ,154    | 1  | ,695 | ,880   | ,464                | 1,668 |
|                     | VASTY2(6)  | -1,417 | ,449 | 9,952   | 1  | ,002 | ,242   | ,101                | ,585  |
|                     | VASTY2(7)  | ,652   | ,272 | 5,733   | 1  | ,017 | 1,920  | 1,126               | 3,274 |
|                     | VASTY2(8)  | -,189  | ,321 | ,345    | 1  | ,557 | ,828   | ,442                | 1,554 |
|                     | VASTY2(9)  | ,318   | ,290 | 1,196   | 1  | ,274 | 1,374  | ,778                | 2,428 |
|                     | VASTY2(10) | ,952   | ,268 | 12,619  | 1  | ,000 | 2,590  | 1,532               | 4,379 |
|                     | VASTY2(11) | ,635   | ,273 | 5,425   | 1  | ,020 | 1,887  | 1,106               | 3,220 |
|                     | VASTY2(12) | ,097   | ,298 | ,106    | 1  | ,745 | 1,102  | ,614                | 1,978 |
|                     | VASTY2(13) | ,938   | ,270 | 12,073  | 1  | ,001 | 2,554  | 1,505               | 4,335 |
|                     | VASTY2(14) | -,272  | ,322 | ,709    | 1  | ,400 | ,762   | ,405                | 1,434 |
|                     | VASTY2(15) | ,180   | ,295 | ,373    | 1  | ,541 | 1,198  | ,672                | 2,135 |
|                     | VASTY2(16) | ,357   | ,333 | 1,153   | 1  | ,283 | 1,430  | ,744                | 2,745 |
|                     | VASTY2(17) | -1,093 | ,418 | 6,818   | 1  | ,009 | ,335   | ,148                | ,761  |
|                     | VASTY2(18) | -,567  | ,379 | 2,246   | 1  | ,134 | ,567   | ,270                | 1,191 |
|                     | VASTY2(19) | -1,692 | ,558 | 9,192   | 1  | ,002 | ,184   | ,062                | ,550  |

## Variables in the Equation

|            | B      | S.E. | Wald   | df | Sig. | Exp(B) | 95% C.I. for EXP(B) |       |
|------------|--------|------|--------|----|------|--------|---------------------|-------|
|            |        |      |        |    |      |        | Lower               | Upper |
| VASTY2(20) | -,008  | ,318 | ,001   | 1  | ,981 | ,992   | ,533                | 1,849 |
| VASTY2(21) | -,084  | ,312 | ,073   | 1  | ,787 | ,919   | ,499                | 1,694 |
| VASTY2(22) | ,246   | ,290 | ,723   | 1  | ,395 | 1,280  | ,725                | 2,259 |
| VASTY2(23) | ,277   | ,288 | ,925   | 1  | ,336 | 1,320  | ,750                | 2,322 |
| VASTY2(24) | ,296   | ,286 | 1,077  | 1  | ,299 | 1,345  | ,768                | 2,354 |
| VASTY2(25) | ,309   | ,302 | 1,048  | 1  | ,306 | 1,363  | ,754                | 2,464 |
| VASTY2(26) | -,920  | ,419 | 4,824  | 1  | ,028 | ,398   | ,175                | ,906  |
| VASTY2(27) | -1,507 | ,468 | 10,356 | 1  | ,001 | ,222   | ,088                | ,555  |
| VASTY2(28) | -1,157 | ,480 | 5,805  | 1  | ,016 | ,314   | ,123                | ,806  |
| VASTY2(29) | -1,228 | ,418 | 8,647  | 1  | ,003 | ,293   | ,129                | ,664  |
| VASTY2(30) | -,147  | ,317 | ,216   | 1  | ,642 | ,863   | ,464                | 1,606 |
| VASTY2(31) | ,576   | ,288 | 4,009  | 1  | ,045 | 1,779  | 1,012               | 3,126 |
| VASTY2(32) | ,004   | ,328 | ,000   | 1  | ,991 | 1,004  | ,527                | 1,911 |
| VASTY2(33) | ,100   | ,325 | ,094   | 1  | ,759 | 1,105  | ,585                | 2,087 |
| VASTY2(34) | -1,256 | ,439 | 8,196  | 1  | ,004 | ,285   | ,121                | ,673  |
| VASTY2(35) | ,701   | ,277 | 6,408  | 1  | ,011 | 2,016  | 1,172               | 3,471 |
| weekday    |        |      | 12,752 | 6  | ,047 |        |                     |       |
| weekday(1) | -,004  | ,129 | ,001   | 1  | ,972 | ,996   | ,773                | 1,283 |
| weekday(2) | -,025  | ,130 | ,038   | 1  | ,845 | ,975   | ,755                | 1,258 |
| weekday(3) | -,039  | ,131 | ,089   | 1  | ,766 | ,962   | ,745                | 1,242 |
| weekday(4) | ,046   | ,129 | ,127   | 1  | ,721 | 1,047  | ,813                | 1,349 |
| weekday(5) | -,230  | ,140 | 2,718  | 1  | ,099 | ,794   | ,604                | 1,044 |
| weekday(6) | -,371  | ,144 | 6,677  | 1  | ,010 | ,690   | ,521                | ,914  |
| holiday(1) | -,443  | ,253 | 3,063  | 1  | ,080 | ,642   | ,391                | 1,055 |
| season     |        |      | 3,705  | 4  | ,447 |        |                     |       |
| season(1)  | -,116  | ,113 | 1,048  | 1  | ,306 | ,890   | ,713                | 1,112 |
| season(2)  | -,124  | ,106 | 1,368  | 1  | ,242 | ,883   | ,717                | 1,088 |
| season(3)  | ,058   | ,108 | ,288   | 1  | ,592 | 1,060  | ,857                | 1,311 |
| season(4)  | -,077  | ,115 | ,453   | 1  | ,501 | ,925   | ,739                | 1,160 |
| Constant   | -2,485 | ,256 | 94,351 | 1  | ,000 | ,083   |                     |       |

a. Variable(s) entered on step 1: sv7, VASTY2, weekday, holiday, season.

\*\*

```
LOGISTIC REGRESSION VARIABLES seurauslt3
/METHOD=ENTER bv1 VASTY2 weekday holiday season
/CONTRAST (bv1)=Indicator(1)
/CONTRAST (VASTY2)=Indicator(1)
```

```

1
2
3 /CONTRAST (weekday)=Indicator(1)
4 /CONTRAST (holiday)=Indicator(1)
5 /CONTRAST (season)=Indicator(1)
6 /PRINT=CI(95)
7
8 /CRITERIA=PIN(0.05) POUT(0.10) ITERATE(20) CUT(0.5).
9

```

## Block 1: Method = Enter

### Omnibus Tests of Model Coefficients

|        |       | Chi-square | df | Sig. |
|--------|-------|------------|----|------|
| Step 1 | Step  | 327,914    | 48 | ,000 |
|        | Block | 327,914    | 48 | ,000 |
|        | Model | 327,914    | 48 | ,000 |

### Model Summary

| Step | -2 Log likelihood    | Cox & Snell R Square | Nagelkerke R Square |
|------|----------------------|----------------------|---------------------|
| 1    | 3211,14 <sup>a</sup> | ,026                 | ,105                |

a. Estimation terminated at iteration number 9 because parameter estimates changed by less than ,001.

### Classification Table<sup>a</sup>

|                    |                                                    | Predicted                         |                                   |
|--------------------|----------------------------------------------------|-----------------------------------|-----------------------------------|
|                    |                                                    | seurauslt3 seuraus highest = ...  | 0 ingen händelse eller ei haittaa |
|                    | Observed                                           |                                   |                                   |
| Step 1             | seurauslt3 seuraus highest = haitta (i någon form) | 0 ingen händelse eller ei haittaa | 12075                             |
|                    |                                                    | 1 haitta (i någon form)           | 400                               |
| Overall Percentage |                                                    |                                   |                                   |

Classification Table<sup>a</sup>

| Observed           |                                                    | Predicted                         |                         |
|--------------------|----------------------------------------------------|-----------------------------------|-------------------------|
|                    |                                                    | seurauslt3 seuraus highest = ...  | 1 haitta (i någon form) |
| Step 1             | seurauslt3 seuraus highest = haitta (i någon form) | 0 ingen händelse eller ei haittaa | 0                       |
|                    |                                                    | 1 haitta (i någon form)           | 0                       |
| Overall Percentage |                                                    |                                   |                         |

Classification Table<sup>a</sup>

| Observed           |                                                    | Predicted                         |       |
|--------------------|----------------------------------------------------|-----------------------------------|-------|
|                    |                                                    | Percentage Correct                |       |
| Step 1             | seurauslt3 seuraus highest = haitta (i någon form) | 0 ingen händelse eller ei haittaa | 100,0 |
|                    |                                                    | 1 haitta (i någon form)           | ,0    |
| Overall Percentage |                                                    |                                   | 96,8  |

a. The cut value is ,500

view only

## Variables in the Equation

|                     | B      | S.E.  | Wald    | df | Sig. | Exp(B) | 95% C.I. for EXP(B) |       |
|---------------------|--------|-------|---------|----|------|--------|---------------------|-------|
|                     |        |       |         |    |      |        | Lower               | Upper |
| Step 1 <sup>a</sup> |        |       |         |    |      |        |                     |       |
| bv1                 |        |       | 2,915   | 2  | ,233 |        |                     |       |
| bv1(1)              | -,164  | ,149  | 1,207   | 1  | ,272 | ,849   | ,633                | 1,137 |
| bv1(2)              | ,107   | ,121  | ,784    | 1  | ,376 | 1,113  | ,878                | 1,411 |
| VASTY2              |        |       | 227,323 | 35 | ,000 |        |                     |       |
| VASTY2(1)           | ,601   | ,424  | 2,008   | 1  | ,156 | 1,824  | ,794                | 4,188 |
| VASTY2(2)           | 1,205  | ,390  | 9,552   | 1  | ,002 | 3,337  | 1,554               | 7,166 |
| VASTY2(3)           | -1,621 | ,788  | 4,230   | 1  | ,040 | ,198   | ,042                | ,927  |
| VASTY2(4)           | ,455   | ,432  | 1,113   | 1  | ,292 | 1,577  | ,677                | 3,674 |
| VASTY2(5)           | ,451   | ,442  | 1,041   | 1  | ,308 | 1,569  | ,660                | 3,731 |
| VASTY2(6)           | -1,580 | ,787  | 4,035   | 1  | ,045 | ,206   | ,044                | ,962  |
| VASTY2(7)           | ,569   | ,426  | 1,786   | 1  | ,181 | 1,767  | ,767                | 4,069 |
| VASTY2(8)           | ,249   | ,449  | ,308    | 1  | ,579 | 1,283  | ,532                | 3,090 |
| VASTY2(9)           | 1,093  | ,398  | 7,532   | 1  | ,006 | 2,984  | 1,367               | 6,515 |
| VASTY2(10)          | 1,458  | ,381  | 14,666  | 1  | ,000 | 4,299  | 2,038               | 9,070 |
| VASTY2(11)          | 1,130  | ,393  | 8,254   | 1  | ,004 | 3,096  | 1,432               | 6,694 |
| VASTY2(12)          | ,613   | ,420  | 2,129   | 1  | ,145 | 1,847  | ,810                | 4,211 |
| VASTY2(13)          | 1,441  | ,383  | 14,149  | 1  | ,000 | 4,225  | 1,994               | 8,952 |
| VASTY2(14)          | ,158   | ,457  | ,120    | 1  | ,729 | 1,172  | ,478                | 2,872 |
| VASTY2(15)          | -1,566 | ,786  | 3,969   | 1  | ,046 | ,209   | ,045                | ,975  |
| VASTY2(16)          | -,502  | ,675  | ,554    | 1  | ,457 | ,605   | ,161                | 2,272 |
| VASTY2(17)          | -,252  | ,510  | ,244    | 1  | ,621 | ,777   | ,286                | 2,113 |
| VASTY2(18)          | -1,113 | ,672  | 2,749   | 1  | ,097 | ,328   | ,088                | 1,225 |
| VASTY2(19)          | -2,106 | 1,061 | 3,942   | 1  | ,047 | ,122   | ,015                | ,973  |
| VASTY2(20)          | ,428   | ,451  | ,902    | 1  | ,342 | 1,534  | ,634                | 3,712 |
| VASTY2(21)          | -1,553 | ,786  | 3,904   | 1  | ,048 | ,212   | ,045                | ,988  |
| VASTY2(22)          | -,777  | ,607  | 1,642   | 1  | ,200 | ,460   | ,140                | 1,509 |
| VASTY2(23)          | ,199   | ,456  | ,190    | 1  | ,663 | 1,220  | ,499                | 2,984 |
| VASTY2(24)          | -,915  | ,608  | 2,270   | 1  | ,132 | ,400   | ,122                | 1,317 |
| VASTY2(25)          | -1,333 | ,786  | 2,877   | 1  | ,090 | ,264   | ,056                | 1,231 |
| VASTY2(26)          | -2,073 | 1,058 | 3,840   | 1  | ,050 | ,126   | ,016                | 1,000 |
| VASTY2(27)          | -,897  | ,607  | 2,182   | 1  | ,140 | ,408   | ,124                | 1,341 |
| VASTY2(28)          | -,168  | ,567  | ,088    | 1  | ,767 | ,846   | ,278                | 2,569 |
| VASTY2(29)          | -,470  | ,533  | ,778    | 1  | ,378 | ,625   | ,220                | 1,777 |
| VASTY2(30)          | -,305  | ,510  | ,358    | 1  | ,550 | ,737   | ,271                | 2,004 |
| VASTY2(31)          | 1,234  | ,390  | 10,020  | 1  | ,002 | 3,437  | 1,600               | 7,380 |
| VASTY2(32)          | -,242  | ,511  | ,224    | 1  | ,636 | ,785   | ,288                | 2,138 |
| VASTY2(33)          | -,264  | ,511  | ,267    | 1  | ,605 | ,768   | ,282                | 2,090 |
| VASTY2(34)          | -1,152 | ,671  | 2,946   | 1  | ,086 | ,316   | ,085                | 1,178 |
| VASTY2(35)          | ,052   | ,482  | ,012    | 1  | ,913 | 1,054  | ,410                | 2,710 |
| weekday             |        |       | 12,250  | 6  | ,057 |        |                     |       |
| weekday(1)          | ,221   | ,185  | 1,422   | 1  | ,233 | 1,247  | ,867                | 1,794 |
| weekday(2)          | -,015  | ,195  | ,006    | 1  | ,940 | ,986   | ,673                | 1,444 |

Variables in the Equation

|            | B      | S.E. | Wald   | df | Sig. | Exp(B) | 95% C.I. for EXP(B) |       |
|------------|--------|------|--------|----|------|--------|---------------------|-------|
|            |        |      |        |    |      |        | Lower               | Upper |
| weekday(3) | ,081   | ,191 | ,178   | 1  | ,673 | 1,084  | ,745                | 1,576 |
| weekday(4) | ,240   | ,186 | 1,669  | 1  | ,196 | 1,272  | ,883                | 1,831 |
| weekday(5) | -,051  | ,200 | ,064   | 1  | ,800 | ,951   | ,643                | 1,406 |
| weekday(6) | -,400  | ,217 | 3,386  | 1  | ,066 | ,670   | ,438                | 1,026 |
| holiday(1) | -,468  | ,372 | 1,579  | 1  | ,209 | ,626   | ,302                | 1,299 |
| season     |        |      | 10,214 | 4  | ,037 |        |                     |       |
| season(1)  | -,203  | ,162 | 1,567  | 1  | ,211 | ,816   | ,594                | 1,122 |
| season(2)  | -,082  | ,146 | ,313   | 1  | ,576 | ,921   | ,692                | 1,227 |
| season(3)  | ,073   | ,151 | ,235   | 1  | ,628 | 1,076  | ,801                | 1,445 |
| season(4)  | -,482  | ,181 | 7,122  | 1  | ,008 | ,617   | ,433                | ,880  |
| Constant   | -3,548 | ,373 | 90,257 | 1  | ,000 | ,029   |                     |       |

a. Variable(s) entered on step 1: bv1, VASTY2, weekday, holiday, season.

LOGISTIC REGRESSION VARIABLES seurauslt3

/METHOD=ENTER bv2 VASTY2 weekday holiday season

/CONTRAST (bv2)=Indicator(1)

/CONTRAST (VASTY2)=Indicator(1)

/CONTRAST (weekday)=Indicator(1)

/CONTRAST (holiday)=Indicator(1)

/CONTRAST (season)=Indicator(1)

/PRINT=CI(95)

/CRITERIA=PIN(0.05) POUT(0.10) ITERATE(20) CUT(0.5).

### Block 1: Method = Enter

Omnibus Tests of Model Coefficients

|        |       | Chi-square | df | Sig. |
|--------|-------|------------|----|------|
| Step 1 | Step  | 326,097    | 48 | ,000 |
|        | Block | 326,097    | 48 | ,000 |
|        | Model | 326,097    | 48 | ,000 |

**Model Summary**

| Step | -2 Log likelihood    | Cox & Snell R Square | Nagelkerke R Square |
|------|----------------------|----------------------|---------------------|
| 1    | 3212,95 <sup>a</sup> | ,026                 | ,104                |

a. Estimation terminated at iteration number 9 because parameter estimates changed by less than ,001.

**Classification Table<sup>a</sup>**

|                    |                                                    | Predicted                         |
|--------------------|----------------------------------------------------|-----------------------------------|
|                    |                                                    | seurauslt3 seuraus highest = ...  |
| Observed           |                                                    | 0 ingen händelse eller ei haittaa |
| Step 1             | seurauslt3 seuraus highest = haitta (i någon form) | 12075                             |
|                    |                                                    | 400                               |
| Overall Percentage |                                                    |                                   |

**Classification Table<sup>a</sup>**

|                    |                                                    | Predicted                        |
|--------------------|----------------------------------------------------|----------------------------------|
|                    |                                                    | seurauslt3 seuraus highest = ... |
| Observed           |                                                    | 1 haitta (i någon form)          |
| Step 1             | seurauslt3 seuraus highest = haitta (i någon form) | 0                                |
|                    |                                                    | 0                                |
| Overall Percentage |                                                    |                                  |

**Classification Table<sup>a</sup>**

|                    |                                                    | Predicted          |
|--------------------|----------------------------------------------------|--------------------|
|                    |                                                    | Percentage Correct |
| Step 1             | seurauslt3 seuraus highest = haitta (i någon form) | 100,0              |
|                    |                                                    | ,0                 |
| Overall Percentage |                                                    | 96,8               |



a. The cut value is ,500

**Variables in the Equation**

|                         | B      | S.E.  | Wald    | df | Sig. | Exp(B) | 95% C.I. for EXP(B) |       |
|-------------------------|--------|-------|---------|----|------|--------|---------------------|-------|
|                         |        |       |         |    |      |        | Lower               | Upper |
| Step 1 <sup>a</sup> bv2 |        |       | 1,141   | 2  | ,565 |        |                     |       |
| bv2(1)                  | ,047   | ,150  | ,100    | 1  | ,752 | 1,049  | ,781                | 1,407 |
| bv2(2)                  | ,138   | ,136  | 1,025   | 1  | ,311 | 1,148  | ,879                | 1,499 |
| VASTY2                  |        |       | 230,166 | 35 | ,000 |        |                     |       |
| VASTY2(1)               | ,595   | ,424  | 1,971   | 1  | ,160 | 1,814  | ,790                | 4,164 |
| VASTY2(2)               | 1,221  | ,390  | 9,800   | 1  | ,002 | 3,390  | 1,579               | 7,280 |
| VASTY2(3)               | -1,577 | ,788  | 4,009   | 1  | ,045 | ,207   | ,044                | ,967  |
| VASTY2(4)               | ,487   | ,431  | 1,274   | 1  | ,259 | 1,627  | ,699                | 3,788 |
| VASTY2(5)               | ,463   | ,442  | 1,101   | 1  | ,294 | 1,590  | ,669                | 3,779 |
| VASTY2(6)               | -1,556 | ,786  | 3,916   | 1  | ,048 | ,211   | ,045                | ,985  |
| VASTY2(7)               | ,606   | ,424  | 2,043   | 1  | ,153 | 1,834  | ,798                | 4,211 |
| VASTY2(8)               | ,272   | ,449  | ,367    | 1  | ,545 | 1,312  | ,544                | 3,163 |
| VASTY2(9)               | 1,114  | ,398  | 7,820   | 1  | ,005 | 3,047  | 1,396               | 6,652 |
| VASTY2(10)              | 1,486  | ,381  | 15,215  | 1  | ,000 | 4,418  | 2,094               | 9,322 |
| VASTY2(11)              | 1,139  | ,393  | 8,399   | 1  | ,004 | 3,125  | 1,446               | 6,753 |
| VASTY2(12)              | ,641   | ,421  | 2,326   | 1  | ,127 | 1,899  | ,833                | 4,330 |
| VASTY2(13)              | 1,482  | ,383  | 14,951  | 1  | ,000 | 4,404  | 2,077               | 9,336 |
| VASTY2(14)              | ,176   | ,457  | ,148    | 1  | ,701 | 1,192  | ,486                | 2,921 |
| VASTY2(15)              | -1,551 | ,786  | 3,892   | 1  | ,049 | ,212   | ,045                | ,990  |
| VASTY2(16)              | -,515  | ,675  | ,582    | 1  | ,445 | ,598   | ,159                | 2,242 |
| VASTY2(17)              | -,266  | ,510  | ,271    | 1  | ,602 | ,767   | ,282                | 2,084 |
| VASTY2(18)              | -1,125 | ,671  | 2,807   | 1  | ,094 | ,325   | ,087                | 1,210 |
| VASTY2(19)              | -2,212 | 1,059 | 4,364   | 1  | ,037 | ,109   | ,014                | ,872  |
| VASTY2(20)              | ,442   | ,450  | ,966    | 1  | ,326 | 1,556  | ,644                | 3,760 |
| VASTY2(21)              | -1,543 | ,786  | 3,857   | 1  | ,050 | ,214   | ,046                | ,997  |
| VASTY2(22)              | -,807  | ,607  | 1,770   | 1  | ,183 | ,446   | ,136                | 1,465 |
| VASTY2(23)              | ,190   | ,456  | ,173    | 1  | ,678 | 1,209  | ,494                | 2,956 |
| VASTY2(24)              | -,886  | ,607  | 2,127   | 1  | ,145 | ,412   | ,125                | 1,356 |
| VASTY2(25)              | -1,337 | ,786  | 2,890   | 1  | ,089 | ,263   | ,056                | 1,227 |
| VASTY2(26)              | -2,061 | 1,058 | 3,795   | 1  | ,051 | ,127   | ,016                | 1,013 |
| VASTY2(27)              | -,883  | ,607  | 2,113   | 1  | ,146 | ,414   | ,126                | 1,360 |
| VASTY2(28)              | -,137  | ,567  | ,058    | 1  | ,809 | ,872   | ,287                | 2,652 |
| VASTY2(29)              | -,448  | ,533  | ,707    | 1  | ,400 | ,639   | ,225                | 1,816 |
| VASTY2(30)              | -,289  | ,510  | ,322    | 1  | ,571 | ,749   | ,275                | 2,035 |
| VASTY2(31)              | 1,224  | ,389  | 9,888   | 1  | ,002 | 3,399  | 1,586               | 7,289 |
| VASTY2(32)              | -,272  | ,511  | ,283    | 1  | ,595 | ,762   | ,280                | 2,073 |
| VASTY2(33)              | -,282  | ,510  | ,304    | 1  | ,581 | ,755   | ,278                | 2,052 |
| VASTY2(34)              | -1,142 | ,671  | 2,894   | 1  | ,089 | ,319   | ,086                | 1,190 |
| VASTY2(35)              | ,074   | ,481  | ,024    | 1  | ,878 | 1,077  | ,420                | 2,763 |

Variables in the Equation

|            | B      | S.E. | Wald   | df | Sig. | Exp(B) | 95% C.I. for EXP(B) |       |
|------------|--------|------|--------|----|------|--------|---------------------|-------|
|            |        |      |        |    |      |        | Lower               | Upper |
| weekday    |        |      | 12,613 | 6  | ,050 |        |                     |       |
| weekday(1) | ,227   | ,185 | 1,495  | 1  | ,221 | 1,254  | ,872                | 1,803 |
| weekday(2) | -,013  | ,195 | ,005   | 1  | ,946 | ,987   | ,674                | 1,446 |
| weekday(3) | ,080   | ,191 | ,173   | 1  | ,677 | 1,083  | ,745                | 1,574 |
| weekday(4) | ,235   | ,186 | 1,591  | 1  | ,207 | 1,264  | ,878                | 1,820 |
| weekday(5) | -,063  | ,200 | ,098   | 1  | ,754 | ,939   | ,635                | 1,390 |
| weekday(6) | -,409  | ,217 | 3,534  | 1  | ,060 | ,665   | ,434                | 1,018 |
| holiday(1) | -,478  | ,373 | 1,648  | 1  | ,199 | ,620   | ,299                | 1,287 |
| season     |        |      | 10,322 | 4  | ,035 |        |                     |       |
| season(1)  | -,210  | ,162 | 1,675  | 1  | ,196 | ,811   | ,590                | 1,114 |
| season(2)  | -,107  | ,146 | ,534   | 1  | ,465 | ,899   | ,675                | 1,197 |
| season(3)  | ,067   | ,150 | ,196   | 1  | ,658 | 1,069  | ,796                | 1,435 |
| season(4)  | -,488  | ,181 | 7,301  | 1  | ,007 | ,614   | ,431                | ,875  |
| Constant   | -3,625 | ,382 | 90,231 | 1  | ,000 | ,027   |                     |       |

a. Variable(s) entered on step 1: bv2, VASTY2, weekday, holiday, season.

```
LOGISTIC REGRESSION VARIABLES seurauslt3
/METHOD=ENTER bv3 VASTY2 weekday holiday season
/CONTRAST (bv3)=Indicator(1)
/CONTRAST (VASTY2)=Indicator(1)
/CONTRAST (weekday)=Indicator(1)
/CONTRAST (holiday)=Indicator(1)
/CONTRAST (season)=Indicator(1)
/PRINT=CI(95)
/CRITERIA=PIN(0.05) POUT(0.10) ITERATE(20) CUT(0.5).
```

### Block 1: Method = Enter

Omnibus Tests of Model Coefficients

|        |       | Chi-square | df | Sig. |
|--------|-------|------------|----|------|
| Step 1 | Step  | 325,681    | 48 | ,000 |
|        | Block | 325,681    | 48 | ,000 |
|        | Model | 325,681    | 48 | ,000 |

**Model Summary**

| Step | -2 Log likelihood    | Cox & Snell R Square | Nagelkerke R Square |
|------|----------------------|----------------------|---------------------|
| 1    | 3213,37 <sup>a</sup> | ,026                 | ,104                |

a. Estimation terminated at iteration number 9 because parameter estimates changed by less than ,001.

**Classification Table<sup>a</sup>**

|                    |                                                    | Predicted                         |
|--------------------|----------------------------------------------------|-----------------------------------|
|                    |                                                    | seurauslt3 seuraus highest = ...  |
| Observed           |                                                    | 0 ingen händelse eller ei haittaa |
| Step 1             | seurauslt3 seuraus highest = haitta (i någon form) | 12075<br>400                      |
| Overall Percentage |                                                    |                                   |

**Classification Table<sup>a</sup>**

|                    |                                                    | Predicted                        |
|--------------------|----------------------------------------------------|----------------------------------|
|                    |                                                    | seurauslt3 seuraus highest = ... |
| Observed           |                                                    | 1 haitta (i någon form)          |
| Step 1             | seurauslt3 seuraus highest = haitta (i någon form) | 0<br>0                           |
| Overall Percentage |                                                    |                                  |

**Classification Table<sup>a</sup>**

|                    |                                                    | Predicted          |
|--------------------|----------------------------------------------------|--------------------|
| Observed           |                                                    | Percentage Correct |
| Step 1             | seurauslt3 seuraus highest = haitta (i någon form) | 100,0<br>,0        |
| Overall Percentage |                                                    | 96,8               |

a. The cut value is ,500

**Variables in the Equation**

|                         | B      | S.E.  | Wald    | df | Sig. | Exp(B) | 95% C.I. for EXP(B) |       |
|-------------------------|--------|-------|---------|----|------|--------|---------------------|-------|
|                         |        |       |         |    |      |        | Lower               | Upper |
| Step 1 <sup>a</sup> bv3 |        |       | ,731    | 2  | ,694 |        |                     |       |
| bv3(1)                  | -,092  | ,199  | ,217    | 1  | ,642 | ,912   | ,618                | 1,346 |
| bv3(2)                  | ,098   | ,150  | ,425    | 1  | ,515 | 1,103  | ,821                | 1,481 |
| VASTY2                  |        |       | 232,872 | 35 | ,000 |        |                     |       |
| VASTY2(1)               | ,612   | ,424  | 2,082   | 1  | ,149 | 1,845  | ,803                | 4,237 |
| VASTY2(2)               | 1,227  | ,390  | 9,912   | 1  | ,002 | 3,410  | 1,589               | 7,319 |
| VASTY2(3)               | -1,569 | ,788  | 3,967   | 1  | ,046 | ,208   | ,044                | ,975  |
| VASTY2(4)               | ,493   | ,431  | 1,308   | 1  | ,253 | 1,638  | ,703                | 3,815 |
| VASTY2(5)               | ,474   | ,441  | 1,155   | 1  | ,282 | 1,607  | ,677                | 3,818 |
| VASTY2(6)               | -1,552 | ,787  | 3,889   | 1  | ,049 | ,212   | ,045                | ,990  |
| VASTY2(7)               | ,608   | ,428  | 2,019   | 1  | ,155 | 1,838  | ,794                | 4,254 |
| VASTY2(8)               | ,284   | ,448  | ,403    | 1  | ,526 | 1,329  | ,552                | 3,197 |
| VASTY2(9)               | 1,128  | ,398  | 8,050   | 1  | ,005 | 3,089  | 1,417               | 6,734 |
| VASTY2(10)              | 1,491  | ,380  | 15,384  | 1  | ,000 | 4,443  | 2,109               | 9,362 |
| VASTY2(11)              | 1,147  | ,393  | 8,514   | 1  | ,004 | 3,149  | 1,457               | 6,805 |
| VASTY2(12)              | ,651   | ,420  | 2,406   | 1  | ,121 | 1,918  | ,842                | 4,365 |
| VASTY2(13)              | 1,504  | ,381  | 15,606  | 1  | ,000 | 4,498  | 2,133               | 9,483 |
| VASTY2(14)              | ,191   | ,457  | ,175    | 1  | ,676 | 1,210  | ,495                | 2,962 |
| VASTY2(15)              | -1,536 | ,786  | 3,821   | 1  | ,051 | ,215   | ,046                | 1,004 |
| VASTY2(16)              | -,508  | ,676  | ,566    | 1  | ,452 | ,601   | ,160                | 2,262 |
| VASTY2(17)              | -,260  | ,510  | ,259    | 1  | ,610 | ,771   | ,284                | 2,096 |
| VASTY2(18)              | -1,115 | ,672  | 2,758   | 1  | ,097 | ,328   | ,088                | 1,223 |
| VASTY2(19)              | -2,166 | 1,063 | 4,150   | 1  | ,042 | ,115   | ,014                | ,921  |
| VASTY2(20)              | ,452   | ,451  | 1,005   | 1  | ,316 | 1,572  | ,649                | 3,803 |
| VASTY2(21)              | -1,533 | ,786  | 3,809   | 1  | ,051 | ,216   | ,046                | 1,007 |
| VASTY2(22)              | -,815  | ,606  | 1,808   | 1  | ,179 | ,443   | ,135                | 1,452 |
| VASTY2(23)              | ,194   | ,456  | ,181    | 1  | ,671 | 1,214  | ,496                | 2,970 |
| VASTY2(24)              | -,876  | ,607  | 2,081   | 1  | ,149 | ,416   | ,127                | 1,369 |
| VASTY2(25)              | -1,332 | ,786  | 2,870   | 1  | ,090 | ,264   | ,057                | 1,232 |
| VASTY2(26)              | -2,045 | 1,058 | 3,740   | 1  | ,053 | ,129   | ,016                | 1,028 |
| VASTY2(27)              | -,862  | ,607  | 2,020   | 1  | ,155 | ,422   | ,129                | 1,387 |
| VASTY2(28)              | -,121  | ,566  | ,045    | 1  | ,831 | ,886   | ,292                | 2,689 |
| VASTY2(29)              | -,445  | ,533  | ,698    | 1  | ,403 | ,641   | ,225                | 1,821 |
| VASTY2(30)              | -,289  | ,510  | ,322    | 1  | ,571 | ,749   | ,275                | 2,035 |
| VASTY2(31)              | 1,242  | ,392  | 10,069  | 1  | ,002 | 3,464  | 1,608               | 7,462 |
| VASTY2(32)              | -,249  | ,513  | ,235    | 1  | ,628 | ,780   | ,285                | 2,132 |
| VASTY2(33)              | -,262  | ,512  | ,262    | 1  | ,609 | ,770   | ,282                | 2,099 |
| VASTY2(34)              | -1,136 | ,671  | 2,866   | 1  | ,090 | ,321   | ,086                | 1,196 |
| VASTY2(35)              | ,084   | ,482  | ,031    | 1  | ,861 | 1,088  | ,423                | 2,800 |

Variables in the Equation

|            | B      | S.E. | Wald   | df | Sig. | Exp(B) | 95% C.I. for EXP(B) |       |
|------------|--------|------|--------|----|------|--------|---------------------|-------|
|            |        |      |        |    |      |        | Lower               | Upper |
| weekday    |        |      | 12,421 | 6  | ,053 |        |                     |       |
| weekday(1) | ,223   | ,185 | 1,455  | 1  | ,228 | 1,250  | ,870                | 1,798 |
| weekday(2) | -,019  | ,195 | ,009   | 1  | ,923 | ,981   | ,670                | 1,437 |
| weekday(3) | ,077   | ,191 | ,163   | 1  | ,686 | 1,080  | ,743                | 1,571 |
| weekday(4) | ,232   | ,186 | 1,562  | 1  | ,211 | 1,262  | ,876                | 1,816 |
| weekday(5) | -,065  | ,200 | ,107   | 1  | ,743 | ,937   | ,634                | 1,385 |
| weekday(6) | -,406  | ,218 | 3,482  | 1  | ,062 | ,666   | ,435                | 1,021 |
| holiday(1) | -,479  | ,373 | 1,657  | 1  | ,198 | ,619   | ,298                | 1,285 |
| season     |        |      | 10,360 | 4  | ,035 |        |                     |       |
| season(1)  | -,209  | ,162 | 1,666  | 1  | ,197 | ,811   | ,590                | 1,115 |
| season(2)  | -,106  | ,146 | ,527   | 1  | ,468 | ,900   | ,676                | 1,197 |
| season(3)  | ,067   | ,150 | ,200   | 1  | ,655 | 1,070  | ,796                | 1,436 |
| season(4)  | -,489  | ,181 | 7,323  | 1  | ,007 | ,613   | ,430                | ,874  |
| Constant   | -3,562 | ,371 | 92,066 | 1  | ,000 | ,028   |                     |       |

a. Variable(s) entered on step 1: bv3, VASTY2, weekday, holiday, season.

```
LOGISTIC REGRESSION VARIABLES seurauslt3
/METHOD=ENTER sv3 VASTY2 weekday holiday season
/CONTRAST (sv3)=Indicator(1)
/CONTRAST (VASTY2)=Indicator(1)
/CONTRAST (weekday)=Indicator(1)
/CONTRAST (holiday)=Indicator(1)
/CONTRAST (season)=Indicator(1)
/PRINT=CI(95)
/CRITERIA=PIN(0.05) POUT(0.10) ITERATE(20) CUT(0.5).
```

**Block 1: Method = Enter**

Omnibus Tests of Model Coefficients

|        |       | Chi-square | df | Sig. |
|--------|-------|------------|----|------|
| Step 1 | Step  | 325,661    | 48 | ,000 |
|        | Block | 325,661    | 48 | ,000 |
|        | Model | 325,661    | 48 | ,000 |

**Model Summary**

| Step | -2 Log likelihood    | Cox & Snell R Square | Nagelkerke R Square |
|------|----------------------|----------------------|---------------------|
| 1    | 3213,39 <sup>a</sup> | ,026                 | ,104                |

a. Estimation terminated at iteration number 9 because parameter estimates changed by less than ,001.

**Classification Table<sup>a</sup>**

|                    |                                                    | Predicted                         |
|--------------------|----------------------------------------------------|-----------------------------------|
|                    |                                                    | seurauslt3 seuraus highest = ...  |
| Observed           |                                                    | 0 ingen händelse eller ei haittaa |
| Step 1             | seurauslt3 seuraus highest = haitta (i någon form) | 12075                             |
|                    |                                                    | 400                               |
| Overall Percentage |                                                    |                                   |

**Classification Table<sup>a</sup>**

|                    |                                                    | Predicted                        |
|--------------------|----------------------------------------------------|----------------------------------|
|                    |                                                    | seurauslt3 seuraus highest = ... |
| Observed           |                                                    | 1 haitta (i någon form)          |
| Step 1             | seurauslt3 seuraus highest = haitta (i någon form) | 0                                |
|                    |                                                    | 0                                |
| Overall Percentage |                                                    |                                  |

**Classification Table<sup>a</sup>**

|                    |                                                    | Predicted          |
|--------------------|----------------------------------------------------|--------------------|
|                    |                                                    | Percentage Correct |
| Observed           |                                                    |                    |
| Step 1             | seurauslt3 seuraus highest = haitta (i någon form) | 100,0              |
|                    |                                                    | ,0                 |
| Overall Percentage |                                                    | 96,8               |

a. The cut value is ,500

**Variables in the Equation**

|                         | B      | S.E.  | Wald    | df | Sig. | Exp(B) | 95% C.I. for EXP(B) |       |
|-------------------------|--------|-------|---------|----|------|--------|---------------------|-------|
|                         |        |       |         |    |      |        | Lower               | Upper |
| Step 1 <sup>a</sup> sv3 |        |       | ,702    | 2  | ,704 |        |                     |       |
| sv3(1)                  | -,104  | ,157  | ,440    | 1  | ,507 | ,901   | ,663                | 1,225 |
| sv3(2)                  | ,034   | ,149  | ,051    | 1  | ,822 | 1,034  | ,772                | 1,385 |
| VASTY2                  |        |       | 221,463 | 35 | ,000 |        |                     |       |
| VASTY2(1)               | ,595   | ,425  | 1,955   | 1  | ,162 | 1,813  | ,787                | 4,172 |
| VASTY2(2)               | 1,192  | ,395  | 9,093   | 1  | ,003 | 3,295  | 1,518               | 7,153 |
| VASTY2(3)               | -1,512 | ,786  | 3,703   | 1  | ,054 | ,220   | ,047                | 1,028 |
| VASTY2(4)               | ,544   | ,429  | 1,603   | 1  | ,205 | 1,722  | ,742                | 3,995 |
| VASTY2(5)               | ,527   | ,444  | 1,412   | 1  | ,235 | 1,694  | ,710                | 4,042 |
| VASTY2(6)               | -1,570 | ,791  | 3,941   | 1  | ,047 | ,208   | ,044                | ,980  |
| VASTY2(7)               | ,681   | ,420  | 2,627   | 1  | ,105 | 1,975  | ,867                | 4,497 |
| VASTY2(8)               | ,323   | ,449  | ,518    | 1  | ,472 | 1,381  | ,573                | 3,330 |
| VASTY2(9)               | 1,145  | ,397  | 8,312   | 1  | ,004 | 3,141  | 1,443               | 6,838 |
| VASTY2(10)              | 1,455  | ,389  | 14,017  | 1  | ,000 | 4,286  | 2,001               | 9,181 |
| VASTY2(11)              | 1,158  | ,393  | 8,680   | 1  | ,003 | 3,183  | 1,473               | 6,875 |
| VASTY2(12)              | ,619   | ,425  | 2,123   | 1  | ,145 | 1,858  | ,808                | 4,273 |
| VASTY2(13)              | 1,481  | ,390  | 14,438  | 1  | ,000 | 4,397  | 2,048               | 9,440 |
| VASTY2(14)              | ,179   | ,459  | ,152    | 1  | ,697 | 1,196  | ,486                | 2,940 |
| VASTY2(15)              | -1,567 | ,789  | 3,942   | 1  | ,047 | ,209   | ,044                | ,980  |
| VASTY2(16)              | -,491  | ,675  | ,528    | 1  | ,467 | ,612   | ,163                | 2,300 |
| VASTY2(17)              | -,235  | ,511  | ,212    | 1  | ,645 | ,790   | ,290                | 2,150 |
| VASTY2(18)              | -1,027 | ,679  | 2,286   | 1  | ,131 | ,358   | ,095                | 1,356 |
| VASTY2(19)              | -2,138 | 1,062 | 4,053   | 1  | ,044 | ,118   | ,015                | ,945  |
| VASTY2(20)              | ,453   | ,452  | 1,006   | 1  | ,316 | 1,573  | ,649                | 3,812 |
| VASTY2(21)              | -1,506 | ,786  | 3,671   | 1  | ,055 | ,222   | ,048                | 1,035 |
| VASTY2(22)              | -,828  | ,606  | 1,867   | 1  | ,172 | ,437   | ,133                | 1,433 |
| VASTY2(23)              | ,202   | ,456  | ,197    | 1  | ,658 | 1,224  | ,500                | 2,995 |
| VASTY2(24)              | -,861  | ,607  | 2,013   | 1  | ,156 | ,423   | ,129                | 1,389 |
| VASTY2(25)              | -1,310 | ,787  | 2,773   | 1  | ,096 | ,270   | ,058                | 1,261 |
| VASTY2(26)              | -2,037 | 1,058 | 3,709   | 1  | ,054 | ,130   | ,016                | 1,037 |
| VASTY2(27)              | -,874  | ,609  | 2,060   | 1  | ,151 | ,417   | ,126                | 1,377 |
| VASTY2(28)              | -,157  | ,574  | ,075    | 1  | ,785 | ,855   | ,278                | 2,633 |
| VASTY2(29)              | -,487  | ,543  | ,807    | 1  | ,369 | ,614   | ,212                | 1,779 |
| VASTY2(30)              | -,242  | ,512  | ,223    | 1  | ,636 | ,785   | ,288                | 2,140 |
| VASTY2(31)              | 1,323  | ,399  | 10,991  | 1  | ,001 | 3,753  | 1,717               | 8,203 |
| VASTY2(32)              | -,177  | ,521  | ,115    | 1  | ,734 | ,838   | ,302                | 2,326 |
| VASTY2(33)              | -,187  | ,521  | ,129    | 1  | ,720 | ,830   | ,299                | 2,303 |
| VASTY2(34)              | -1,127 | ,671  | 2,818   | 1  | ,093 | ,324   | ,087                | 1,208 |
| VASTY2(35)              | ,119   | ,479  | ,061    | 1  | ,804 | 1,126  | ,440                | 2,882 |

## Variables in the Equation

|            | B      | S.E. | Wald   | df | Sig. | Exp(B) | 95% C.I. for EXP(B) |       |
|------------|--------|------|--------|----|------|--------|---------------------|-------|
|            |        |      |        |    |      |        | Lower               | Upper |
| weekday    |        |      | 12,798 | 6  | ,046 |        |                     |       |
| weekday(1) | ,226   | ,185 | 1,493  | 1  | ,222 | 1,254  | ,872                | 1,803 |
| weekday(2) | -,012  | ,195 | ,004   | 1  | ,952 | ,988   | ,675                | 1,448 |
| weekday(3) | ,085   | ,191 | ,196   | 1  | ,658 | 1,088  | ,748                | 1,583 |
| weekday(4) | ,242   | ,186 | 1,693  | 1  | ,193 | 1,274  | ,885                | 1,836 |
| weekday(5) | -,060  | ,200 | ,089   | 1  | ,766 | ,942   | ,637                | 1,394 |
| weekday(6) | -,408  | ,217 | 3,525  | 1  | ,060 | ,665   | ,434                | 1,018 |
| holiday(1) | -,473  | ,373 | 1,608  | 1  | ,205 | ,623   | ,300                | 1,294 |
| season     |        |      | 10,546 | 4  | ,032 |        |                     |       |
| season(1)  | -,213  | ,162 | 1,735  | 1  | ,188 | ,808   | ,588                | 1,110 |
| season(2)  | -,108  | ,146 | ,546   | 1  | ,460 | ,898   | ,675                | 1,195 |
| season(3)  | ,068   | ,150 | ,202   | 1  | ,653 | 1,070  | ,797                | 1,437 |
| season(4)  | -,493  | ,181 | 7,436  | 1  | ,006 | ,611   | ,429                | ,871  |
| Constant   | -3,551 | ,377 | 88,742 | 1  | ,000 | ,029   |                     |       |

a. Variable(s) entered on step 1: sv3, VASTY2, weekday, holiday, season.

```
LOGISTIC REGRESSION VARIABLES seurauslt3
/METHOD=ENTER sv5 VASTY2 weekday holiday season
/CONTRAST (sv5)=Indicator(1)
/CONTRAST (VASTY2)=Indicator(1)
/CONTRAST (weekday)=Indicator(1)
/CONTRAST (holiday)=Indicator(1)
/CONTRAST (season)=Indicator(1)
/PRINT=CI(95)
/CRITERIA=PIN(0.05) POUT(0.10) ITERATE(20) CUT(0.5).
```

**Block 1: Method = Enter**

## Omnibus Tests of Model Coefficients

|        |       | Chi-square | df | Sig. |
|--------|-------|------------|----|------|
| Step 1 | Step  | 327,567    | 50 | ,000 |
|        | Block | 327,567    | 50 | ,000 |
|        | Model | 327,567    | 50 | ,000 |



**Model Summary**

| Step | -2 Log likelihood    | Cox & Snell R Square | Nagelkerke R Square |
|------|----------------------|----------------------|---------------------|
| 1    | 3211,48 <sup>a</sup> | ,026                 | ,105                |

a. Estimation terminated at iteration number 9 because parameter estimates changed by less than ,001.

**Classification Table<sup>a</sup>**

|                    |                                                    | Predicted<br>seurauslt3<br>seuraus<br>highest = ... |
|--------------------|----------------------------------------------------|-----------------------------------------------------|
| Observed           |                                                    | 0 ingen<br>händelse<br>eller ei<br>haittaa          |
| Step 1             | seurauslt3 seuraus highest = haitta (i någon form) | 12075<br>400                                        |
| Overall Percentage |                                                    |                                                     |

**Classification Table<sup>a</sup>**

|                    |                                                    | Predicted<br>seurauslt3<br>seuraus<br>highest = ... |
|--------------------|----------------------------------------------------|-----------------------------------------------------|
| Observed           |                                                    | 1 haitta (i någon form)                             |
| Step 1             | seurauslt3 seuraus highest = haitta (i någon form) | 0<br>0                                              |
| Overall Percentage |                                                    |                                                     |

**Classification Table<sup>a</sup>**

|                    |                                                    | Predicted          |
|--------------------|----------------------------------------------------|--------------------|
| Observed           |                                                    | Percentage Correct |
| Step 1             | seurauslt3 seuraus highest = haitta (i någon form) | 100,0<br>,0        |
| Overall Percentage |                                                    | 96,8               |

a. The cut value is ,500

### Variables in the Equation

|                     | B      | S.E.  | Wald    | df | Sig. | Exp(B) | 95% C.I. for EXP(B) |       |
|---------------------|--------|-------|---------|----|------|--------|---------------------|-------|
|                     |        |       |         |    |      |        | Lower               | Upper |
| Step 1 <sup>a</sup> |        |       |         |    |      |        |                     |       |
| sv5                 |        |       | 2,569   | 4  | ,632 |        |                     |       |
| sv5(1)              | ,047   | ,199  | ,056    | 1  | ,813 | 1,048  | ,710                | 1,547 |
| sv5(2)              | -,118  | ,208  | ,319    | 1  | ,572 | ,889   | ,591                | 1,337 |
| sv5(3)              | ,103   | ,182  | ,321    | 1  | ,571 | 1,109  | ,776                | 1,583 |
| sv5(4)              | ,214   | ,196  | 1,196   | 1  | ,274 | 1,239  | ,844                | 1,818 |
| VASTY2              |        |       | 218,078 | 35 | ,000 |        |                     |       |
| VASTY2(1)           | ,554   | ,426  | 1,693   | 1  | ,193 | 1,739  | ,755                | 4,005 |
| VASTY2(2)           | 1,116  | ,398  | 7,852   | 1  | ,005 | 3,053  | 1,399               | 6,663 |
| VASTY2(3)           | -1,511 | ,786  | 3,699   | 1  | ,054 | ,221   | ,047                | 1,029 |
| VASTY2(4)           | ,529   | ,429  | 1,521   | 1  | ,217 | 1,698  | ,732                | 3,938 |
| VASTY2(5)           | ,514   | ,444  | 1,341   | 1  | ,247 | 1,673  | ,700                | 3,995 |
| VASTY2(6)           | -1,682 | ,795  | 4,481   | 1  | ,034 | ,186   | ,039                | ,883  |
| VASTY2(7)           | ,668   | ,420  | 2,530   | 1  | ,112 | 1,950  | ,856                | 4,441 |
| VASTY2(8)           | ,341   | ,450  | ,575    | 1  | ,448 | 1,407  | ,583                | 3,396 |
| VASTY2(9)           | 1,137  | ,397  | 8,198   | 1  | ,004 | 3,117  | 1,431               | 6,789 |
| VASTY2(10)          | 1,364  | ,393  | 12,063  | 1  | ,001 | 3,913  | 1,812               | 8,450 |
| VASTY2(11)          | 1,140  | ,393  | 8,406   | 1  | ,004 | 3,125  | 1,447               | 6,753 |
| VASTY2(12)          | ,556   | ,426  | 1,704   | 1  | ,192 | 1,744  | ,757                | 4,021 |
| VASTY2(13)          | 1,379  | ,395  | 12,219  | 1  | ,000 | 3,972  | 1,833               | 8,609 |
| VASTY2(14)          | ,121   | ,460  | ,069    | 1  | ,793 | 1,128  | ,458                | 2,781 |
| VASTY2(15)          | -1,646 | ,791  | 4,336   | 1  | ,037 | ,193   | ,041                | ,908  |
| VASTY2(16)          | -,559  | ,676  | ,683    | 1  | ,408 | ,572   | ,152                | 2,152 |
| VASTY2(17)          | -,258  | ,511  | ,256    | 1  | ,613 | ,772   | ,284                | 2,102 |
| VASTY2(18)          | -1,128 | ,684  | 2,718   | 1  | ,099 | ,324   | ,085                | 1,237 |
| VASTY2(19)          | -2,243 | 1,066 | 4,433   | 1  | ,035 | ,106   | ,013                | ,856  |
| VASTY2(20)          | ,382   | ,454  | ,709    | 1  | ,400 | 1,466  | ,602                | 3,570 |
| VASTY2(21)          | -1,529 | ,786  | 3,782   | 1  | ,052 | ,217   | ,046                | 1,012 |
| VASTY2(22)          | -,836  | ,606  | 1,903   | 1  | ,168 | ,433   | ,132                | 1,422 |
| VASTY2(23)          | ,189   | ,457  | ,171    | 1  | ,679 | 1,208  | ,494                | 2,957 |
| VASTY2(24)          | -,892  | ,607  | 2,161   | 1  | ,142 | ,410   | ,125                | 1,346 |
| VASTY2(25)          | -1,313 | ,787  | 2,780   | 1  | ,095 | ,269   | ,058                | 1,259 |
| VASTY2(26)          | -2,063 | 1,058 | 3,803   | 1  | ,051 | ,127   | ,016                | 1,010 |
| VASTY2(27)          | -,945  | ,610  | 2,395   | 1  | ,122 | ,389   | ,118                | 1,286 |
| VASTY2(28)          | -,283  | ,581  | ,237    | 1  | ,626 | ,753   | ,241                | 2,353 |
| VASTY2(29)          | -,620  | ,551  | 1,265   | 1  | ,261 | ,538   | ,183                | 1,585 |
| VASTY2(30)          | -,247  | ,512  | ,233    | 1  | ,629 | ,781   | ,286                | 2,130 |
| VASTY2(31)          | 1,248  | ,403  | 9,567   | 1  | ,002 | 3,483  | 1,579               | 7,679 |
| VASTY2(32)          | -,276  | ,527  | ,275    | 1  | ,600 | ,759   | ,270                | 2,130 |
| VASTY2(33)          | -,292  | ,528  | ,306    | 1  | ,580 | ,747   | ,265                | 2,101 |

## Variables in the Equation

|            | B      | S.E. | Wald   | df | Sig. | Exp(B) | 95% C.I. for EXP(B) |       |
|------------|--------|------|--------|----|------|--------|---------------------|-------|
|            |        |      |        |    |      |        | Lower               | Upper |
| VASTY2(34) | -1,134 | ,671 | 2,855  | 1  | ,091 | ,322   | ,086                | 1,199 |
| VASTY2(35) | ,071   | ,480 | ,022   | 1  | ,882 | 1,074  | ,419                | 2,750 |
| weekday    |        |      | 13,001 | 6  | ,043 |        |                     |       |
| weekday(1) | ,227   | ,185 | 1,499  | 1  | ,221 | 1,255  | ,873                | 1,804 |
| weekday(2) | -,008  | ,195 | ,002   | 1  | ,967 | ,992   | ,677                | 1,453 |
| weekday(3) | ,086   | ,191 | ,205   | 1  | ,651 | 1,090  | ,750                | 1,586 |
| weekday(4) | ,250   | ,186 | 1,794  | 1  | ,180 | 1,284  | ,891                | 1,849 |
| weekday(5) | -,053  | ,200 | ,070   | 1  | ,791 | ,948   | ,640                | 1,404 |
| weekday(6) | -,411  | ,217 | 3,578  | 1  | ,059 | ,663   | ,433                | 1,015 |
| holiday(1) | -,476  | ,373 | 1,629  | 1  | ,202 | ,621   | ,299                | 1,290 |
| season     |        |      | 10,497 | 4  | ,033 |        |                     |       |
| season(1)  | -,209  | ,162 | 1,666  | 1  | ,197 | ,811   | ,590                | 1,115 |
| season(2)  | -,102  | ,146 | ,483   | 1  | ,487 | ,903   | ,678                | 1,204 |
| season(3)  | ,068   | ,151 | ,204   | 1  | ,651 | 1,070  | ,797                | 1,438 |
| season(4)  | -,493  | ,181 | 7,443  | 1  | ,006 | ,611   | ,429                | ,870  |
| Constant   | -3,602 | ,388 | 85,949 | 1  | ,000 | ,027   |                     |       |

a. Variable(s) entered on step 1: sv5, VASTY2, weekday, holiday, season.

```
LOGISTIC REGRESSION VARIABLES seurauslt3
/METHOD=ENTER sv7 VASTY2 weekday holiday season
/CONTRAST (sv7)=Indicator(1)
/CONTRAST (VASTY2)=Indicator(1)
/CONTRAST (weekday)=Indicator(1)
/CONTRAST (holiday)=Indicator(1)
/CONTRAST (season)=Indicator(1)
/PRINT=CI(95)
/CRITERIA=PIN(0.05) POUT(0.10) ITERATE(20) CUT(0.5).
```

### Block 1: Method = Enter

#### Omnibus Tests of Model Coefficients

|        |       | Chi-square | df | Sig. |
|--------|-------|------------|----|------|
| Step 1 | Step  | 328,261    | 52 | ,000 |
|        | Block | 328,261    | 52 | ,000 |
|        | Model | 328,261    | 52 | ,000 |

**Model Summary**

| Step | -2 Log likelihood    | Cox & Snell R Square | Nagelkerke R Square |
|------|----------------------|----------------------|---------------------|
| 1    | 3210,79 <sup>a</sup> | ,026                 | ,105                |

a. Estimation terminated at iteration number 9 because parameter estimates changed by less than ,001.

**Classification Table<sup>a</sup>**

|                    |                                                    | Predicted                         |
|--------------------|----------------------------------------------------|-----------------------------------|
|                    |                                                    | seurauslt3 seuraus highest = ...  |
| Observed           |                                                    | 0 ingen händelse eller ei haittaa |
| Step 1             | seurauslt3 seuraus highest = haitta (i någon form) | 12075                             |
|                    |                                                    | 400                               |
| Overall Percentage |                                                    |                                   |

**Classification Table<sup>a</sup>**

|                    |                                                    | Predicted                        |
|--------------------|----------------------------------------------------|----------------------------------|
|                    |                                                    | seurauslt3 seuraus highest = ... |
| Observed           |                                                    | 1 haitta (i någon form)          |
| Step 1             | seurauslt3 seuraus highest = haitta (i någon form) | 0                                |
|                    |                                                    | 0                                |
| Overall Percentage |                                                    |                                  |

**Classification Table<sup>a</sup>**

|                    |                                                    | Predicted          |
|--------------------|----------------------------------------------------|--------------------|
|                    |                                                    | Percentage Correct |
| Step 1             | seurauslt3 seuraus highest = haitta (i någon form) | 100,0              |
|                    |                                                    | ,0                 |
| Overall Percentage |                                                    | 96,8               |

a. The cut value is ,500

**Variables in the Equation**

|                         | B      | S.E.  | Wald    | df | Sig. | Exp(B) | 95% C.I. for EXP(B) |       |
|-------------------------|--------|-------|---------|----|------|--------|---------------------|-------|
|                         |        |       |         |    |      |        | Lower               | Upper |
| Step 1 <sup>a</sup> sv7 |        |       | 3,282   | 6  | ,773 |        |                     |       |
| sv7(1)                  | -,065  | ,222  | ,087    | 1  | ,768 | ,937   | ,606                | 1,447 |
| sv7(2)                  | -,206  | ,245  | ,712    | 1  | ,399 | ,813   | ,504                | 1,314 |
| sv7(3)                  | -,013  | ,229  | ,003    | 1  | ,955 | ,987   | ,630                | 1,546 |
| sv7(4)                  | ,147   | ,209  | ,489    | 1  | ,484 | 1,158  | ,768                | 1,746 |
| sv7(5)                  | -,029  | ,203  | ,020    | 1  | ,887 | ,972   | ,653                | 1,445 |
| sv7(6)                  | ,165   | ,223  | ,549    | 1  | ,459 | 1,179  | ,762                | 1,825 |
| VASTY2                  |        |       | 221,129 | 35 | ,000 |        |                     |       |
| VASTY2(1)               | ,601   | ,426  | 1,990   | 1  | ,158 | 1,823  | ,791                | 4,201 |
| VASTY2(2)               | 1,171  | ,399  | 8,608   | 1  | ,003 | 3,224  | 1,475               | 7,049 |
| VASTY2(3)               | -1,500 | ,786  | 3,644   | 1  | ,056 | ,223   | ,048                | 1,041 |
| VASTY2(4)               | ,563   | ,430  | 1,717   | 1  | ,190 | 1,756  | ,756                | 4,076 |
| VASTY2(5)               | ,538   | ,444  | 1,467   | 1  | ,226 | 1,712  | ,717                | 4,088 |
| VASTY2(6)               | -1,644 | ,797  | 4,250   | 1  | ,039 | ,193   | ,040                | ,922  |
| VASTY2(7)               | ,672   | ,420  | 2,560   | 1  | ,110 | 1,958  | ,860                | 4,458 |
| VASTY2(8)               | ,342   | ,450  | ,576    | 1  | ,448 | 1,407  | ,583                | 3,400 |
| VASTY2(9)               | 1,153  | ,397  | 8,417   | 1  | ,004 | 3,166  | 1,453               | 6,897 |
| VASTY2(10)              | 1,423  | ,394  | 13,066  | 1  | ,000 | 4,151  | 1,919               | 8,981 |
| VASTY2(11)              | 1,164  | ,394  | 8,747   | 1  | ,003 | 3,203  | 1,481               | 6,928 |
| VASTY2(12)              | ,606   | ,426  | 2,028   | 1  | ,154 | 1,834  | ,796                | 4,224 |
| VASTY2(13)              | 1,437  | ,396  | 13,154  | 1  | ,000 | 4,206  | 1,935               | 9,142 |
| VASTY2(14)              | ,167   | ,461  | ,131    | 1  | ,718 | 1,181  | ,479                | 2,913 |
| VASTY2(15)              | -1,594 | ,791  | 4,061   | 1  | ,044 | ,203   | ,043                | ,957  |
| VASTY2(16)              | -,515  | ,677  | ,578    | 1  | ,447 | ,598   | ,159                | 2,252 |
| VASTY2(17)              | -,223  | ,511  | ,190    | 1  | ,663 | ,800   | ,294                | 2,180 |
| VASTY2(18)              | -1,040 | ,687  | 2,290   | 1  | ,130 | ,353   | ,092                | 1,359 |
| VASTY2(19)              | -2,156 | 1,069 | 4,070   | 1  | ,044 | ,116   | ,014                | ,941  |
| VASTY2(20)              | ,422   | ,455  | ,861    | 1  | ,353 | 1,525  | ,625                | 3,721 |
| VASTY2(21)              | -1,505 | ,786  | 3,667   | 1  | ,055 | ,222   | ,048                | 1,036 |
| VASTY2(22)              | -,824  | ,606  | 1,850   | 1  | ,174 | ,439   | ,134                | 1,438 |
| VASTY2(23)              | ,211   | ,457  | ,214    | 1  | ,644 | 1,235  | ,505                | 3,024 |
| VASTY2(24)              | -,871  | ,607  | 2,058   | 1  | ,151 | ,419   | ,127                | 1,376 |
| VASTY2(25)              | -1,292 | ,787  | 2,694   | 1  | ,101 | ,275   | ,059                | 1,285 |
| VASTY2(26)              | -2,045 | 1,058 | 3,739   | 1  | ,053 | ,129   | ,016                | 1,028 |
| VASTY2(27)              | -,897  | ,611  | 2,152   | 1  | ,142 | ,408   | ,123                | 1,352 |
| VASTY2(28)              | -,253  | ,587  | ,185    | 1  | ,667 | ,777   | ,246                | 2,455 |
| VASTY2(29)              | -,592  | ,558  | 1,122   | 1  | ,289 | ,553   | ,185                | 1,653 |
| VASTY2(30)              | -,223  | ,512  | ,190    | 1  | ,663 | ,800   | ,293                | 2,182 |
| VASTY2(31)              | 1,328  | ,405  | 10,762  | 1  | ,001 | 3,772  | 1,706               | 8,337 |

Variables in the Equation

|            | B      | S.E. | Wald   | df | Sig. | Exp(B) | 95% C.I. for EXP(B) |       |
|------------|--------|------|--------|----|------|--------|---------------------|-------|
|            |        |      |        |    |      |        | Lower               | Upper |
| VASTY2(32) | -,189  | ,531 | ,127   | 1  | ,722 | ,828   | ,292                | 2,344 |
| VASTY2(33) | -,204  | ,534 | ,146   | 1  | ,703 | ,816   | ,287                | 2,322 |
| VASTY2(34) | -1,123 | ,671 | 2,796  | 1  | ,094 | ,325   | ,087                | 1,213 |
| VASTY2(35) | ,114   | ,480 | ,056   | 1  | ,812 | 1,121  | ,437                | 2,872 |
| weekday    |        |      | 12,916 | 6  | ,044 |        |                     |       |
| weekday(1) | ,226   | ,185 | 1,486  | 1  | ,223 | 1,254  | ,872                | 1,803 |
| weekday(2) | -,016  | ,195 | ,006   | 1  | ,937 | ,985   | ,672                | 1,443 |
| weekday(3) | ,081   | ,191 | ,178   | 1  | ,673 | 1,084  | ,745                | 1,577 |
| weekday(4) | ,244   | ,186 | 1,712  | 1  | ,191 | 1,276  | ,886                | 1,839 |
| weekday(5) | -,059  | ,200 | ,087   | 1  | ,768 | ,943   | ,637                | 1,395 |
| weekday(6) | -,412  | ,218 | 3,586  | 1  | ,058 | ,662   | ,432                | 1,015 |
| holiday(1) | -,466  | ,373 | 1,559  | 1  | ,212 | ,628   | ,302                | 1,304 |
| season     |        |      | 10,304 | 4  | ,036 |        |                     |       |
| season(1)  | -,207  | ,162 | 1,629  | 1  | ,202 | ,813   | ,592                | 1,117 |
| season(2)  | -,096  | ,147 | ,428   | 1  | ,513 | ,909   | ,682                | 1,211 |
| season(3)  | ,067   | ,151 | ,195   | 1  | ,658 | 1,069  | ,796                | 1,436 |
| season(4)  | -,490  | ,181 | 7,340  | 1  | ,007 | ,613   | ,430                | ,873  |
| Constant   | -3,575 | ,395 | 82,069 | 1  | ,000 | ,028   |                     |       |

a. Variable(s) entered on step 1: sv7, VASTY2, weekday, holiday, season.

\*\*

```
LOGISTIC REGRESSION VARIABLES handlt1
/METHOD=ENTER bv1 VASTY2 weekday holiday season
/CONTRAST (bv1)=Indicator(1)
/CONTRAST (VASTY2)=Indicator(1)
/CONTRAST (weekday)=Indicator(1)
/CONTRAST (holiday)=Indicator(1)
/CONTRAST (season)=Indicator(1)
/PRINT=CI(95)
/CRITERIA=PIN(0.05) POUT(0.10) ITERATE(20) CUT(0.5).
```

**Block 1: Method = Enter**

## Omnibus Tests of Model Coefficients

|        |       | Chi-square | df | Sig. |
|--------|-------|------------|----|------|
| Step 1 | Step  | 230,912    | 48 | ,000 |
|        | Block | 230,912    | 48 | ,000 |
|        | Model | 230,912    | 48 | ,000 |

## Model Summary

| Step | -2 Log likelihood    | Cox & Snell R Square | Nagelkerke R Square |
|------|----------------------|----------------------|---------------------|
| 1    | 2187,87 <sup>a</sup> | ,018                 | ,104                |

a. Estimation terminated at iteration number 20 because maximum iterations has been reached. Final solution cannot be found.

Classification Table<sup>a</sup>

| Observed           |                                |                           | Predicted                 |                      |
|--------------------|--------------------------------|---------------------------|---------------------------|----------------------|
|                    |                                |                           | 0 ingen eller en händelse | 1 mer än en händelse |
| Step 1             | handlt1 händelse larger than 1 | 0 ingen eller en händelse | 12229                     | 0                    |
|                    |                                | 1 mer än en händelse      | 246                       | 0                    |
| Overall Percentage |                                |                           |                           |                      |

Classification Table<sup>a</sup>

| Observed           |                                |                           | Predicted          |
|--------------------|--------------------------------|---------------------------|--------------------|
|                    |                                |                           | Percentage Correct |
| Step 1             | handlt1 händelse larger than 1 | 0 ingen eller en händelse | 100,0              |
|                    |                                | 1 mer än en händelse      | ,0                 |
| Overall Percentage |                                |                           | 98,0               |

a. The cut value is ,500

## Variables in the Equation

|                     |            | B       | S.E.     | Wald    | df | Sig. | Exp(B) | 95% C.I. |
|---------------------|------------|---------|----------|---------|----|------|--------|----------|
|                     |            |         |          |         |    |      |        | Lower    |
| Step 1 <sup>a</sup> | bv1        |         |          | 8,711   | 2  | ,013 |        |          |
|                     | bv1(1)     | -,311   | ,191     | 2,663   | 1  | ,103 | ,732   | ,504     |
|                     | bv1(2)     | ,280    | ,154     | 3,329   | 1  | ,068 | 1,324  | ,979     |
|                     | VASTY2     |         |          | 120,646 | 35 | ,000 |        |          |
|                     | VASTY2(1)  | ,470    | ,576     | ,667    | 1  | ,414 | 1,600  | ,518     |
|                     | VASTY2(2)  | ,745    | ,545     | 1,868   | 1  | ,172 | 2,107  | ,724     |
|                     | VASTY2(3)  | -1,826  | 1,101    | 2,751   | 1  | ,097 | ,161   | ,019     |
|                     | VASTY2(4)  | ,314    | ,579     | ,295    | 1  | ,587 | 1,369  | ,440     |
|                     | VASTY2(5)  | -,507   | ,735     | ,476    | 1  | ,490 | ,602   | ,142     |
|                     | VASTY2(6)  | -17,050 | 2092,869 | ,000    | 1  | ,993 | ,000   | ,000     |
|                     | VASTY2(7)  | ,675    | ,546     | 1,529   | 1  | ,216 | 1,964  | ,674     |
|                     | VASTY2(8)  | ,241    | ,592     | ,166    | 1  | ,684 | 1,272  | ,399     |
|                     | VASTY2(9)  | ,123    | ,612     | ,040    | 1  | ,841 | 1,130  | ,340     |
|                     | VASTY2(10) | 1,492   | ,501     | 8,885   | 1  | ,003 | 4,447  | 1,667    |
|                     | VASTY2(11) | 1,428   | ,505     | 8,006   | 1  | ,005 | 4,171  | 1,551    |
|                     | VASTY2(12) | -,615   | ,735     | ,699    | 1  | ,403 | ,541   | ,128     |
|                     | VASTY2(13) | -,198   | ,641     | ,095    | 1  | ,758 | ,821   | ,234     |
|                     | VASTY2(14) | ,079    | ,612     | ,017    | 1  | ,898 | 1,082  | ,326     |
|                     | VASTY2(15) | ,099    | ,611     | ,026    | 1  | ,871 | 1,104  | ,333     |
|                     | VASTY2(16) | ,067    | ,739     | ,008    | 1  | ,928 | 1,069  | ,251     |
|                     | VASTY2(17) | -16,898 | 2088,855 | ,000    | 1  | ,994 | ,000   | ,000     |
|                     | VASTY2(18) | -16,934 | 2097,755 | ,000    | 1  | ,994 | ,000   | ,000     |
|                     | VASTY2(19) | -1,378  | 1,105    | 1,554   | 1  | ,212 | ,252   | ,029     |
|                     | VASTY2(20) | -,494   | ,737     | ,449    | 1  | ,503 | ,610   | ,144     |
|                     | VASTY2(21) | -,576   | ,735     | ,615    | 1  | ,433 | ,562   | ,133     |
|                     | VASTY2(22) | ,715    | ,565     | 1,602   | 1  | ,206 | 2,044  | ,676     |
|                     | VASTY2(23) | 1,624   | ,498     | 10,618  | 1  | ,001 | 5,072  | 1,910    |
|                     | VASTY2(24) | 1,190   | ,512     | 5,404   | 1  | ,020 | 3,288  | 1,205    |
|                     | VASTY2(25) | ,526    | ,592     | ,791    | 1  | ,374 | 1,693  | ,531     |
|                     | VASTY2(26) | -,148   | ,677     | ,048    | 1  | ,827 | ,862   | ,229     |
|                     | VASTY2(27) | -1,765  | 1,100    | 2,578   | 1  | ,108 | ,171   | ,020     |
|                     | VASTY2(28) | -1,334  | 1,100    | 1,469   | 1  | ,225 | ,263   | ,030     |
|                     | VASTY2(29) | -17,017 | 2092,198 | ,000    | 1  | ,994 | ,000   | ,000     |
|                     | VASTY2(30) | ,383    | ,576     | ,441    | 1  | ,507 | 1,466  | ,474     |
|                     | VASTY2(31) | 1,060   | ,525     | 4,081   | 1  | ,043 | 2,886  | 1,032    |
|                     | VASTY2(32) | ,022    | ,639     | ,001    | 1  | ,973 | 1,022  | ,292     |
|                     | VASTY2(33) | -,227   | ,676     | ,113    | 1  | ,737 | ,797   | ,212     |
|                     | VASTY2(34) | -1,692  | 1,098    | 2,374   | 1  | ,123 | ,184   | ,021     |
|                     | VASTY2(35) | ,910    | ,538     | 2,864   | 1  | ,091 | 2,485  | ,866     |
|                     | weekday    |         |          | 2,449   | 6  | ,874 |        |          |
|                     | weekday(1) | -,122   | ,235     | ,269    | 1  | ,604 | ,885   | ,559     |
|                     | weekday(2) | -,173   | ,238     | ,525    | 1  | ,469 | ,841   | ,527     |



Variables in the Equation

|                     |            | 95% C.I... |
|---------------------|------------|------------|
|                     |            | Upper      |
| Step 1 <sup>a</sup> | bv1        |            |
|                     | bv1(1)     | 1,065      |
|                     | bv1(2)     | 1,789      |
|                     | VASTY2     |            |
|                     | VASTY2(1)  | 4,944      |
|                     | VASTY2(2)  | 6,137      |
|                     | VASTY2(3)  | 1,393      |
|                     | VASTY2(4)  | 4,258      |
|                     | VASTY2(5)  | 2,545      |
|                     | VASTY2(6)  | .          |
|                     | VASTY2(7)  | 5,725      |
|                     | VASTY2(8)  | 4,058      |
|                     | VASTY2(9)  | 3,755      |
|                     | VASTY2(10) | 11,862     |
|                     | VASTY2(11) | 11,215     |
|                     | VASTY2(12) | 2,285      |
|                     | VASTY2(13) | 2,883      |
|                     | VASTY2(14) | 3,592      |
|                     | VASTY2(15) | 3,660      |
|                     | VASTY2(16) | 4,551      |
|                     | VASTY2(17) | .          |
|                     | VASTY2(18) | .          |
|                     | VASTY2(19) | 2,199      |
|                     | VASTY2(20) | 2,588      |
|                     | VASTY2(21) | 2,373      |
|                     | VASTY2(22) | 6,186      |
|                     | VASTY2(23) | 13,468     |
|                     | VASTY2(24) | 8,968      |
|                     | VASTY2(25) | 5,398      |
|                     | VASTY2(26) | 3,252      |
|                     | VASTY2(27) | 1,477      |
|                     | VASTY2(28) | 2,277      |
|                     | VASTY2(29) | .          |
|                     | VASTY2(30) | 4,534      |
|                     | VASTY2(31) | 8,073      |
|                     | VASTY2(32) | 3,577      |
|                     | VASTY2(33) | 3,001      |
|                     | VASTY2(34) | 1,585      |
|                     | VASTY2(35) | 7,132      |
|                     | weekday    |            |
|                     | weekday(1) | 1,403      |
|                     | weekday(2) | 1,342      |

Peer review only

Variables in the Equation

|            | B      | S.E. | Wald   | df | Sig. | Exp(B) | 95% C.I. |
|------------|--------|------|--------|----|------|--------|----------|
|            |        |      |        |    |      |        | Lower    |
| weekday(3) | ,007   | ,229 | ,001   | 1  | ,975 | 1,007  | ,643     |
| weekday(4) | -,063  | ,235 | ,071   | 1  | ,790 | ,939   | ,593     |
| weekday(5) | -,335  | ,258 | 1,695  | 1  | ,193 | ,715   | ,431     |
| weekday(6) | -,086  | ,239 | ,129   | 1  | ,720 | ,918   | ,574     |
| holiday(1) | -,796  | ,595 | 1,790  | 1  | ,181 | ,451   | ,140     |
| season     |        |      | 5,283  | 4  | ,259 |        |          |
| season(1)  | ,084   | ,198 | ,181   | 1  | ,671 | 1,088  | ,738     |
| season(2)  | -,195  | ,199 | ,952   | 1  | ,329 | ,823   | ,557     |
| season(3)  | ,245   | ,190 | 1,668  | 1  | ,197 | 1,278  | ,881     |
| season(4)  | -,100  | ,214 | ,217   | 1  | ,641 | ,905   | ,596     |
| Constant   | -4,109 | ,491 | 70,152 | 1  | ,000 | ,016   |          |

Variables in the Equation

|            | 95% C.I. |
|------------|----------|
|            | Upper    |
| weekday(3) | 1,577    |
| weekday(4) | 1,489    |
| weekday(5) | 1,185    |
| weekday(6) | 1,466    |
| holiday(1) | 1,448    |
| season     |          |
| season(1)  | 1,603    |
| season(2)  | 1,217    |
| season(3)  | 1,853    |
| season(4)  | 1,376    |
| Constant   |          |

a. Variable(s) entered on step 1: bv1, VASTY2, weekday, holiday, season.

```
LOGISTIC REGRESSION VARIABLES handlt1
/METHOD=ENTER bv2 VASTY2 weekday holiday season
/CONTRAST (bv2)=Indicator(1)
/CONTRAST (VASTY2)=Indicator(1)
/CONTRAST (weekday)=Indicator(1)
/CONTRAST (holiday)=Indicator(1)
/CONTRAST (season)=Indicator(1)
/PRINT=CI(95)
/CRITERIA=PIN(0.05) POUT(0.10) ITERATE(20) CUT(0.5).
```

**Block 1: Method = Enter**

## Omnibus Tests of Model Coefficients

|        |       | Chi-square | df | Sig. |
|--------|-------|------------|----|------|
| Step 1 | Step  | 228,418    | 48 | ,000 |
|        | Block | 228,418    | 48 | ,000 |
|        | Model | 228,418    | 48 | ,000 |

## Model Summary

| Step | -2 Log likelihood    | Cox & Snell R Square | Nagelkerke R Square |
|------|----------------------|----------------------|---------------------|
| 1    | 2190,36 <sup>a</sup> | ,018                 | ,103                |

a. Estimation terminated at iteration number 20 because maximum iterations has been reached. Final solution cannot be found.

Classification Table<sup>a</sup>

| Observed           |                                |                           | Predicted                      |                           |
|--------------------|--------------------------------|---------------------------|--------------------------------|---------------------------|
|                    |                                |                           | handlt1 händelse larger than 1 | 0 ingen eller en händelse |
| Step 1             | handlt1 händelse larger than 1 | 0 ingen eller en händelse | 12229                          | 0                         |
|                    |                                | 1 mer än en händelse      | 246                            | 0                         |
| Overall Percentage |                                |                           |                                |                           |

Classification Table<sup>a</sup>

| Observed           |                                |                           | Predicted          |
|--------------------|--------------------------------|---------------------------|--------------------|
|                    |                                |                           | Percentage Correct |
| Step 1             | handlt1 händelse larger than 1 | 0 ingen eller en händelse | 100,0              |
|                    |                                | 1 mer än en händelse      | ,0                 |
| Overall Percentage |                                |                           | 98,0               |

a. The cut value is ,500

## Variables in the Equation

|                     |            | B       | S.E.     | Wald    | df | Sig. | Exp(B) | 95% C.I. |
|---------------------|------------|---------|----------|---------|----|------|--------|----------|
|                     |            |         |          |         |    |      |        | Lower    |
| Step 1 <sup>a</sup> | bv2        |         |          | 6,307   | 2  | ,043 |        |          |
|                     | bv2(1)     | -,211   | ,190     | 1,234   | 1  | ,267 | ,810   | ,559     |
|                     | bv2(2)     | ,212    | ,171     | 1,537   | 1  | ,215 | 1,237  | ,884     |
|                     | VASTY2     |         |          | 120,890 | 35 | ,000 |        |          |
|                     | VASTY2(1)  | ,460    | ,576     | ,638    | 1  | ,424 | 1,584  | ,513     |
|                     | VASTY2(2)  | ,750    | ,545     | 1,889   | 1  | ,169 | 2,116  | ,727     |
|                     | VASTY2(3)  | -1,780  | 1,100    | 2,618   | 1  | ,106 | ,169   | ,020     |
|                     | VASTY2(4)  | ,345    | ,578     | ,356    | 1  | ,551 | 1,412  | ,455     |
|                     | VASTY2(5)  | -,502   | ,735     | ,466    | 1  | ,495 | ,605   | ,143     |
|                     | VASTY2(6)  | -17,014 | 2094,841 | ,000    | 1  | ,994 | ,000   | ,000     |
|                     | VASTY2(7)  | ,724    | ,544     | 1,775   | 1  | ,183 | 2,063  | ,711     |
|                     | VASTY2(8)  | ,244    | ,592     | ,170    | 1  | ,680 | 1,276  | ,400     |
|                     | VASTY2(9)  | ,134    | ,612     | ,048    | 1  | ,827 | 1,143  | ,344     |
|                     | VASTY2(10) | 1,501   | ,501     | 8,989   | 1  | ,003 | 4,487  | 1,682    |
|                     | VASTY2(11) | 1,443   | ,504     | 8,185   | 1  | ,004 | 4,232  | 1,575    |
|                     | VASTY2(12) | -,604   | ,735     | ,675    | 1  | ,411 | ,547   | ,129     |
|                     | VASTY2(13) | -,172   | ,641     | ,072    | 1  | ,788 | ,842   | ,240     |
|                     | VASTY2(14) | ,094    | ,612     | ,023    | 1  | ,878 | 1,098  | ,331     |
|                     | VASTY2(15) | ,099    | ,612     | ,026    | 1  | ,872 | 1,104  | ,333     |
|                     | VASTY2(16) | ,082    | ,739     | ,012    | 1  | ,912 | 1,085  | ,255     |
|                     | VASTY2(17) | -16,892 | 2090,901 | ,000    | 1  | ,994 | ,000   | ,000     |
|                     | VASTY2(18) | -16,934 | 2098,904 | ,000    | 1  | ,994 | ,000   | ,000     |
|                     | VASTY2(19) | -1,441  | 1,102    | 1,708   | 1  | ,191 | ,237   | ,027     |
|                     | VASTY2(20) | -,464   | ,737     | ,397    | 1  | ,528 | ,629   | ,148     |
|                     | VASTY2(21) | -,570   | ,735     | ,601    | 1  | ,438 | ,566   | ,134     |
|                     | VASTY2(22) | ,716    | ,565     | 1,603   | 1  | ,205 | 2,046  | ,675     |
|                     | VASTY2(23) | 1,616   | ,498     | 10,528  | 1  | ,001 | 5,034  | 1,896    |
|                     | VASTY2(24) | 1,222   | ,512     | 5,700   | 1  | ,017 | 3,393  | 1,245    |
|                     | VASTY2(25) | ,531    | ,592     | ,804    | 1  | ,370 | 1,700  | ,533     |
|                     | VASTY2(26) | -,139   | ,677     | ,042    | 1  | ,838 | ,871   | ,231     |
|                     | VASTY2(27) | -1,750  | 1,099    | 2,535   | 1  | ,111 | ,174   | ,020     |
|                     | VASTY2(28) | -1,329  | 1,101    | 1,458   | 1  | ,227 | ,265   | ,031     |
|                     | VASTY2(29) | -16,999 | 2092,769 | ,000    | 1  | ,994 | ,000   | ,000     |
|                     | VASTY2(30) | ,398    | ,576     | ,479    | 1  | ,489 | 1,490  | ,482     |
|                     | VASTY2(31) | 1,070   | ,524     | 4,177   | 1  | ,041 | 2,916  | 1,045    |
|                     | VASTY2(32) | ,017    | ,638     | ,001    | 1  | ,979 | 1,017  | ,291     |
|                     | VASTY2(33) | -,230   | ,676     | ,115    | 1  | ,734 | ,795   | ,211     |
|                     | VASTY2(34) | -1,681  | 1,098    | 2,343   | 1  | ,126 | ,186   | ,022     |
|                     | VASTY2(35) | ,954    | ,536     | 3,167   | 1  | ,075 | 2,596  | ,908     |
|                     | weekday    |         |          | 2,461   | 6  | ,873 |        |          |
|                     | weekday(1) | -,116   | ,235     | ,243    | 1  | ,622 | ,891   | ,562     |
|                     | weekday(2) | -,168   | ,238     | ,498    | 1  | ,481 | ,845   | ,530     |

Variables in the Equation

|                     |            | 95% C.I... |
|---------------------|------------|------------|
|                     |            | Upper      |
| Step 1 <sup>a</sup> | bv2        |            |
|                     | bv2(1)     | 1,175      |
|                     | bv2(2)     | 1,730      |
|                     | VASTY2     |            |
|                     | VASTY2(1)  | 4,893      |
|                     | VASTY2(2)  | 6,164      |
|                     | VASTY2(3)  | 1,457      |
|                     | VASTY2(4)  | 4,384      |
|                     | VASTY2(5)  | 2,558      |
|                     | VASTY2(6)  | .          |
|                     | VASTY2(7)  | 5,988      |
|                     | VASTY2(8)  | 4,073      |
|                     | VASTY2(9)  | 3,796      |
|                     | VASTY2(10) | 11,970     |
|                     | VASTY2(11) | 11,370     |
|                     | VASTY2(12) | 2,310      |
|                     | VASTY2(13) | 2,956      |
|                     | VASTY2(14) | 3,644      |
|                     | VASTY2(15) | 3,660      |
|                     | VASTY2(16) | 4,616      |
|                     | VASTY2(17) | .          |
|                     | VASTY2(18) | .          |
|                     | VASTY2(19) | 2,055      |
|                     | VASTY2(20) | 2,663      |
|                     | VASTY2(21) | 2,388      |
|                     | VASTY2(22) | 6,198      |
|                     | VASTY2(23) | 13,362     |
|                     | VASTY2(24) | 9,249      |
|                     | VASTY2(25) | 5,421      |
|                     | VASTY2(26) | 3,282      |
|                     | VASTY2(27) | 1,498      |
|                     | VASTY2(28) | 2,289      |
|                     | VASTY2(29) | .          |
|                     | VASTY2(30) | 4,606      |
|                     | VASTY2(31) | 8,140      |
|                     | VASTY2(32) | 3,553      |
|                     | VASTY2(33) | 2,989      |
|                     | VASTY2(34) | 1,602      |
|                     | VASTY2(35) | 7,423      |
|                     | weekday    |            |
|                     | weekday(1) | 1,411      |
|                     | weekday(2) | 1,348      |

Peer review only

Variables in the Equation

|            | B      | S.E. | Wald   | df | Sig. | Exp(B) | 95% C.I. |
|------------|--------|------|--------|----|------|--------|----------|
|            |        |      |        |    |      |        | Lower    |
| weekday(3) | ,010   | ,229 | ,002   | 1  | ,967 | 1,010  | ,645     |
| weekday(4) | -,070  | ,235 | ,089   | 1  | ,766 | ,932   | ,588     |
| weekday(5) | -,339  | ,258 | 1,729  | 1  | ,188 | ,712   | ,430     |
| weekday(6) | -,088  | ,239 | ,136   | 1  | ,712 | ,916   | ,573     |
| holiday(1) | -,795  | ,595 | 1,784  | 1  | ,182 | ,451   | ,141     |
| season     |        |      | 5,407  | 4  | ,248 |        |          |
| season(1)  | ,079   | ,198 | ,158   | 1  | ,691 | 1,082  | ,734     |
| season(2)  | -,209  | ,199 | 1,104  | 1  | ,293 | ,811   | ,549     |
| season(3)  | ,238   | ,190 | 1,573  | 1  | ,210 | 1,268  | ,875     |
| season(4)  | -,105  | ,214 | ,242   | 1  | ,623 | ,900   | ,592     |
| Constant   | -4,117 | ,499 | 68,130 | 1  | ,000 | ,016   |          |

Variables in the Equation

|            | 95% C.I. |
|------------|----------|
|            | Upper    |
| weekday(3) | 1,581    |
| weekday(4) | 1,477    |
| weekday(5) | 1,181    |
| weekday(6) | 1,463    |
| holiday(1) | 1,450    |
| season     |          |
| season(1)  | 1,594    |
| season(2)  | 1,199    |
| season(3)  | 1,839    |
| season(4)  | 1,368    |
| Constant   |          |

a. Variable(s) entered on step 1: bv2, VASTY2, weekday, holiday, season.

```
LOGISTIC REGRESSION VARIABLES handlt1
/METHOD=ENTER bv3 VASTY2 weekday holiday season
/CONTRAST (bv3)=Indicator(1)
/CONTRAST (VASTY2)=Indicator(1)
/CONTRAST (weekday)=Indicator(1)
/CONTRAST (holiday)=Indicator(1)
/CONTRAST (season)=Indicator(1)
/PRINT=CI(95)
/CRITERIA=PIN(0.05) POUT(0.10) ITERATE(20) CUT(0.5).
```

**Block 1: Method = Enter**

## Omnibus Tests of Model Coefficients

|        |       | Chi-square | df | Sig. |
|--------|-------|------------|----|------|
| Step 1 | Step  | 224,832    | 48 | ,000 |
|        | Block | 224,832    | 48 | ,000 |
|        | Model | 224,832    | 48 | ,000 |

## Model Summary

| Step | -2 Log likelihood    | Cox & Snell R Square | Nagelkerke R Square |
|------|----------------------|----------------------|---------------------|
| 1    | 2193,95 <sup>a</sup> | ,018                 | ,101                |

a. Estimation terminated at iteration number 20 because maximum iterations has been reached. Final solution cannot be found.

Classification Table<sup>a</sup>

| Observed           |                                |                           | Predicted                      |                           |
|--------------------|--------------------------------|---------------------------|--------------------------------|---------------------------|
|                    |                                |                           | handlt1 händelse larger than 1 | 0 ingen eller en händelse |
| Step 1             | handlt1 händelse larger than 1 | 0 ingen eller en händelse | 12229                          | 0                         |
|                    |                                | 1 mer än en händelse      | 246                            | 0                         |
| Overall Percentage |                                |                           |                                |                           |

Classification Table<sup>a</sup>

| Observed           |                                |                           | Predicted          |
|--------------------|--------------------------------|---------------------------|--------------------|
|                    |                                |                           | Percentage Correct |
| Step 1             | handlt1 händelse larger than 1 | 0 ingen eller en händelse | 100,0              |
|                    |                                | 1 mer än en händelse      | ,0                 |
| Overall Percentage |                                |                           | 98,0               |

a. The cut value is ,500

## Variables in the Equation

|                     |            | B       | S.E.     | Wald    | df | Sig. | Exp(B) | 95% C.I. |
|---------------------|------------|---------|----------|---------|----|------|--------|----------|
|                     |            |         |          |         |    |      |        | Lower    |
| Step 1 <sup>a</sup> | bv3        |         |          | 2,604   | 2  | ,272 |        |          |
|                     | bv3(1)     | -,422   | ,262     | 2,592   | 1  | ,107 | ,656   | ,393     |
|                     | bv3(2)     | -,054   | ,196     | ,075    | 1  | ,784 | ,948   | ,645     |
|                     | VASTY2     |         |          | 118,563 | 35 | ,000 |        |          |
|                     | VASTY2(1)  | ,519    | ,576     | ,811    | 1  | ,368 | 1,680  | ,544     |
|                     | VASTY2(2)  | ,795    | ,545     | 2,127   | 1  | ,145 | 2,214  | ,761     |
|                     | VASTY2(3)  | -1,630  | 1,100    | 2,197   | 1  | ,138 | ,196   | ,023     |
|                     | VASTY2(4)  | ,475    | ,578     | ,676    | 1  | ,411 | 1,609  | ,518     |
|                     | VASTY2(5)  | -,430   | ,735     | ,342    | 1  | ,559 | ,651   | ,154     |
|                     | VASTY2(6)  | -16,906 | 2096,940 | ,000    | 1  | ,994 | ,000   | ,000     |
|                     | VASTY2(7)  | ,916    | ,549     | 2,786   | 1  | ,095 | 2,500  | ,852     |
|                     | VASTY2(8)  | ,331    | ,591     | ,314    | 1  | ,575 | 1,393  | ,437     |
|                     | VASTY2(9)  | ,237    | ,611     | ,151    | 1  | ,698 | 1,268  | ,383     |
|                     | VASTY2(10) | 1,560   | ,500     | 9,739   | 1  | ,002 | 4,757  | 1,786    |
|                     | VASTY2(11) | 1,495   | ,504     | 8,801   | 1  | ,003 | 4,461  | 1,661    |
|                     | VASTY2(12) | -,533   | ,734     | ,526    | 1  | ,468 | ,587   | ,139     |
|                     | VASTY2(13) | -,017   | ,638     | ,001    | 1  | ,978 | ,983   | ,281     |
|                     | VASTY2(14) | ,186    | ,611     | ,093    | 1  | ,761 | 1,204  | ,364     |
|                     | VASTY2(15) | ,176    | ,611     | ,083    | 1  | ,774 | 1,192  | ,360     |
|                     | VASTY2(16) | ,157    | ,740     | ,045    | 1  | ,832 | 1,170  | ,274     |
|                     | VASTY2(17) | -16,892 | 2092,116 | ,000    | 1  | ,994 | ,000   | ,000     |
|                     | VASTY2(18) | -16,881 | 2100,924 | ,000    | 1  | ,994 | ,000   | ,000     |
|                     | VASTY2(19) | -1,387  | 1,107    | 1,570   | 1  | ,210 | ,250   | ,029     |
|                     | VASTY2(20) | -,351   | ,737     | ,227    | 1  | ,634 | ,704   | ,166     |
|                     | VASTY2(21) | -,516   | ,734     | ,493    | 1  | ,483 | ,597   | ,142     |
|                     | VASTY2(22) | ,636    | ,563     | 1,272   | 1  | ,259 | 1,888  | ,626     |
|                     | VASTY2(23) | 1,627   | ,498     | 10,668  | 1  | ,001 | 5,089  | 1,917    |
|                     | VASTY2(24) | 1,337   | ,511     | 6,841   | 1  | ,009 | 3,809  | 1,398    |
|                     | VASTY2(25) | ,544    | ,592     | ,844    | 1  | ,358 | 1,722  | ,540     |
|                     | VASTY2(26) | -,046   | ,677     | ,005    | 1  | ,945 | ,955   | ,253     |
|                     | VASTY2(27) | -1,633  | 1,099    | 2,210   | 1  | ,137 | ,195   | ,023     |
|                     | VASTY2(28) | -1,230  | 1,100    | 1,252   | 1  | ,263 | ,292   | ,034     |
|                     | VASTY2(29) | -16,968 | 2095,762 | ,000    | 1  | ,994 | ,000   | ,000     |
|                     | VASTY2(30) | ,434    | ,576     | ,567    | 1  | ,451 | 1,543  | ,499     |
|                     | VASTY2(31) | 1,180   | ,526     | 5,037   | 1  | ,025 | 3,255  | 1,161    |
|                     | VASTY2(32) | ,100    | ,641     | ,024    | 1  | ,876 | 1,105  | ,315     |
|                     | VASTY2(33) | -,155   | ,677     | ,052    | 1  | ,819 | ,856   | ,227     |
|                     | VASTY2(34) | -1,651  | 1,098    | 2,261   | 1  | ,133 | ,192   | ,022     |
|                     | VASTY2(35) | 1,097   | ,538     | 4,159   | 1  | ,041 | 2,995  | 1,044    |
|                     | weekday    |         |          | 2,959   | 6  | ,814 |        |          |
|                     | weekday(1) | -,126   | ,235     | ,289    | 1  | ,591 | ,882   | ,557     |
|                     | weekday(2) | -,186   | ,238     | ,609    | 1  | ,435 | ,830   | ,521     |



Variables in the Equation

|                     |            | 95% C.I... |
|---------------------|------------|------------|
|                     |            | Upper      |
| Step 1 <sup>a</sup> | bv3        |            |
|                     | bv3(1)     | 1,096      |
|                     | bv3(2)     | 1,392      |
|                     | VASTY2     |            |
|                     | VASTY2(1)  | 5,190      |
|                     | VASTY2(2)  | 6,442      |
|                     | VASTY2(3)  | 1,692      |
|                     | VASTY2(4)  | 4,995      |
|                     | VASTY2(5)  | 2,747      |
|                     | VASTY2(6)  | .          |
|                     | VASTY2(7)  | 7,331      |
|                     | VASTY2(8)  | 4,434      |
|                     | VASTY2(9)  | 4,201      |
|                     | VASTY2(10) | 12,668     |
|                     | VASTY2(11) | 11,982     |
|                     | VASTY2(12) | 2,476      |
|                     | VASTY2(13) | 3,435      |
|                     | VASTY2(14) | 3,988      |
|                     | VASTY2(15) | 3,944      |
|                     | VASTY2(16) | 4,988      |
|                     | VASTY2(17) | .          |
|                     | VASTY2(18) | .          |
|                     | VASTY2(19) | 2,187      |
|                     | VASTY2(20) | 2,984      |
|                     | VASTY2(21) | 2,519      |
|                     | VASTY2(22) | 5,697      |
|                     | VASTY2(23) | 13,512     |
|                     | VASTY2(24) | 10,374     |
|                     | VASTY2(25) | 5,495      |
|                     | VASTY2(26) | 3,595      |
|                     | VASTY2(27) | 1,682      |
|                     | VASTY2(28) | 2,522      |
|                     | VASTY2(29) | .          |
|                     | VASTY2(30) | 4,768      |
|                     | VASTY2(31) | 9,126      |
|                     | VASTY2(32) | 3,883      |
|                     | VASTY2(33) | 3,230      |
|                     | VASTY2(34) | 1,651      |
|                     | VASTY2(35) | 8,595      |
|                     | weekday    |            |
|                     | weekday(1) | 1,396      |
|                     | weekday(2) | 1,324      |

Peer review only

Variables in the Equation

|            | B      | S.E. | Wald   | df | Sig. | Exp(B) | 95% C.I. |
|------------|--------|------|--------|----|------|--------|----------|
|            |        |      |        |    |      |        | Lower    |
| weekday(3) | -,007  | ,229 | ,001   | 1  | ,976 | ,993   | ,634     |
| weekday(4) | -,091  | ,235 | ,151   | 1  | ,697 | ,913   | ,576     |
| weekday(5) | -,384  | ,257 | 2,234  | 1  | ,135 | ,681   | ,412     |
| weekday(6) | -,110  | ,239 | ,211   | 1  | ,646 | ,896   | ,561     |
| holiday(1) | -,802  | ,595 | 1,815  | 1  | ,178 | ,448   | ,140     |
| season     |        |      | 5,945  | 4  | ,203 |        |          |
| season(1)  | ,060   | ,198 | ,091   | 1  | ,763 | 1,061  | ,720     |
| season(2)  | -,258  | ,199 | 1,681  | 1  | ,195 | ,773   | ,523     |
| season(3)  | ,219   | ,189 | 1,334  | 1  | ,248 | 1,245  | ,859     |
| season(4)  | -,113  | ,213 | ,278   | 1  | ,598 | ,894   | ,588     |
| Constant   | -4,072 | ,487 | 69,792 | 1  | ,000 | ,017   |          |

Variables in the Equation

|            | 95% C.I. |
|------------|----------|
|            | Upper    |
| weekday(3) | 1,555    |
| weekday(4) | 1,446    |
| weekday(5) | 1,127    |
| weekday(6) | 1,431    |
| holiday(1) | 1,440    |
| season     |          |
| season(1)  | 1,564    |
| season(2)  | 1,141    |
| season(3)  | 1,804    |
| season(4)  | 1,358    |
| Constant   |          |

a. Variable(s) entered on step 1: bv3, VASTY2, weekday, holiday, season.

```
LOGISTIC REGRESSION VARIABLES handlt1
/METHOD=ENTER sv3 VASTY2 weekday holiday season
/CONTRAST (sv3)=Indicator(1)
/CONTRAST (VASTY2)=Indicator(1)
/CONTRAST (weekday)=Indicator(1)
/CONTRAST (holiday)=Indicator(1)
/CONTRAST (season)=Indicator(1)
/PRINT=CI(95)
/CRITERIA=PIN(0.05) POUT(0.10) ITERATE(20) CUT(0.5).
```

**Block 1: Method = Enter**

1  
2  
3  
4  
5  
6  
7  
8  
9  
10  
11  
12  
13  
14  
15  
16  
17  
18  
19  
20  
21  
22  
23  
24  
25  
26  
27  
28  
29  
30  
31  
32  
33  
34  
35  
36  
37  
38  
39  
40  
41  
42  
43  
44  
45  
46  
47  
48  
49  
50  
51  
52  
53  
54  
55  
56  
57  
58  
59  
60

### Omnibus Tests of Model Coefficients

|        |       | Chi-square | df | Sig. |
|--------|-------|------------|----|------|
| Step 1 | Step  | 222,666    | 48 | ,000 |
|        | Block | 222,666    | 48 | ,000 |
|        | Model | 222,666    | 48 | ,000 |

### Model Summary

| Step | -2 Log likelihood    | Cox & Snell R Square | Nagelkerke R Square |
|------|----------------------|----------------------|---------------------|
| 1    | 2196,12 <sup>a</sup> | ,018                 | ,100                |

a. Estimation terminated at iteration number 20 because maximum iterations has been reached. Final solution cannot be found.

### Classification Table<sup>a</sup>

| Observed           |                                |                           | Predicted                 |                      |
|--------------------|--------------------------------|---------------------------|---------------------------|----------------------|
|                    |                                |                           | 0 ingen eller en händelse | 1 mer än en händelse |
| Step 1             | handlt1 händelse larger than 1 | 0 ingen eller en händelse | 12229                     | 0                    |
|                    |                                | 1 mer än en händelse      | 246                       | 0                    |
| Overall Percentage |                                |                           |                           |                      |

### Classification Table<sup>a</sup>

| Observed           |                                |                           | Predicted          |
|--------------------|--------------------------------|---------------------------|--------------------|
|                    |                                |                           | Percentage Correct |
| Step 1             | handlt1 händelse larger than 1 | 0 ingen eller en händelse | 100,0              |
|                    |                                | 1 mer än en händelse      | ,0                 |
| Overall Percentage |                                |                           | 98,0               |

a. The cut value is ,500

## Variables in the Equation

|                     |            | B       | S.E.     | Wald    | df | Sig. | Exp(B) | 95% C.I. |
|---------------------|------------|---------|----------|---------|----|------|--------|----------|
|                     |            |         |          |         |    |      |        | Lower    |
| Step 1 <sup>a</sup> | sv3        |         |          | ,684    | 2  | ,710 |        |          |
|                     | sv3(1)     | ,011    | ,182     | ,003    | 1  | ,954 | 1,011  | ,707     |
|                     | sv3(2)     | ,140    | ,181     | ,603    | 1  | ,438 | 1,151  | ,807     |
|                     | VASTY2     |         |          | 118,820 | 35 | ,000 |        |          |
|                     | VASTY2(1)  | ,451    | ,577     | ,611    | 1  | ,435 | 1,570  | ,507     |
|                     | VASTY2(2)  | ,737    | ,551     | 1,786   | 1  | ,181 | 2,089  | ,709     |
|                     | VASTY2(3)  | -1,605  | 1,098    | 2,134   | 1  | ,144 | ,201   | ,023     |
|                     | VASTY2(4)  | ,480    | ,576     | ,695    | 1  | ,404 | 1,616  | ,523     |
|                     | VASTY2(5)  | -,412   | ,737     | ,312    | 1  | ,577 | ,663   | ,156     |
|                     | VASTY2(6)  | -17,006 | 2097,861 | ,000    | 1  | ,994 | ,000   | ,000     |
|                     | VASTY2(7)  | ,915    | ,538     | 2,893   | 1  | ,089 | 2,498  | ,870     |
|                     | VASTY2(8)  | ,369    | ,592     | ,389    | 1  | ,533 | 1,447  | ,453     |
|                     | VASTY2(9)  | ,237    | ,611     | ,151    | 1  | ,698 | 1,268  | ,383     |
|                     | VASTY2(10) | 1,500   | ,509     | 8,699   | 1  | ,003 | 4,484  | 1,654    |
|                     | VASTY2(11) | 1,480   | ,504     | 8,629   | 1  | ,003 | 4,392  | 1,636    |
|                     | VASTY2(12) | -,583   | ,739     | ,622    | 1  | ,430 | ,558   | ,131     |
|                     | VASTY2(13) | -,088   | ,646     | ,019    | 1  | ,891 | ,916   | ,258     |
|                     | VASTY2(14) | ,137    | ,613     | ,050    | 1  | ,824 | 1,146  | ,345     |
|                     | VASTY2(15) | ,112    | ,617     | ,033    | 1  | ,856 | 1,118  | ,334     |
|                     | VASTY2(16) | ,073    | ,739     | ,010    | 1  | ,921 | 1,076  | ,253     |
|                     | VASTY2(17) | -16,912 | 2094,856 | ,000    | 1  | ,994 | ,000   | ,000     |
|                     | VASTY2(18) | -16,890 | 2103,933 | ,000    | 1  | ,994 | ,000   | ,000     |
|                     | VASTY2(19) | -1,592  | 1,105    | 2,076   | 1  | ,150 | ,204   | ,023     |
|                     | VASTY2(20) | -,423   | ,737     | ,329    | 1  | ,566 | ,655   | ,154     |
|                     | VASTY2(21) | -,501   | ,735     | ,466    | 1  | ,495 | ,606   | ,143     |
|                     | VASTY2(22) | ,597    | ,563     | 1,122   | 1  | ,289 | 1,816  | ,602     |
|                     | VASTY2(23) | 1,605   | ,498     | 10,374  | 1  | ,001 | 4,978  | 1,874    |
|                     | VASTY2(24) | 1,318   | ,510     | 6,681   | 1  | ,010 | 3,736  | 1,375    |
|                     | VASTY2(25) | ,531    | ,593     | ,802    | 1  | ,370 | 1,701  | ,532     |
|                     | VASTY2(26) | -,078   | ,676     | ,013    | 1  | ,909 | ,925   | ,246     |
|                     | VASTY2(27) | -1,707  | 1,100    | 2,406   | 1  | ,121 | ,181   | ,021     |
|                     | VASTY2(28) | -1,304  | 1,105    | 1,393   | 1  | ,238 | ,271   | ,031     |
|                     | VASTY2(29) | -17,049 | 2095,904 | ,000    | 1  | ,994 | ,000   | ,000     |
|                     | VASTY2(30) | ,466    | ,577     | ,652    | 1  | ,419 | 1,594  | ,514     |
|                     | VASTY2(31) | 1,126   | ,533     | 4,461   | 1  | ,035 | 3,084  | 1,085    |
|                     | VASTY2(32) | ,012    | ,649     | ,000    | 1  | ,985 | 1,013  | ,284     |
|                     | VASTY2(33) | -,218   | ,686     | ,100    | 1  | ,751 | ,804   | ,210     |
|                     | VASTY2(34) | -1,649  | 1,098    | 2,254   | 1  | ,133 | ,192   | ,022     |
|                     | VASTY2(35) | 1,051   | ,534     | 3,880   | 1  | ,049 | 2,861  | 1,005    |
|                     | weekday    |         |          | 3,005   | 6  | ,808 |        |          |
|                     | weekday(1) | -,114   | ,235     | ,237    | 1  | ,626 | ,892   | ,563     |
|                     | weekday(2) | -,175   | ,238     | ,537    | 1  | ,464 | ,840   | ,527     |

## Variables in the Equation

|                     |            | 95% C.I... |
|---------------------|------------|------------|
|                     |            | Upper      |
| Step 1 <sup>a</sup> | sv3        |            |
|                     | sv3(1)     | 1,444      |
|                     | sv3(2)     | 1,640      |
|                     | VASTY2     |            |
|                     | VASTY2(1)  | 4,863      |
|                     | VASTY2(2)  | 6,155      |
|                     | VASTY2(3)  | 1,730      |
|                     | VASTY2(4)  | 4,997      |
|                     | VASTY2(5)  | 2,810      |
|                     | VASTY2(6)  | .          |
|                     | VASTY2(7)  | 7,172      |
|                     | VASTY2(8)  | 4,617      |
|                     | VASTY2(9)  | 4,196      |
|                     | VASTY2(10) | 12,153     |
|                     | VASTY2(11) | 11,789     |
|                     | VASTY2(12) | 2,376      |
|                     | VASTY2(13) | 3,247      |
|                     | VASTY2(14) | 3,814      |
|                     | VASTY2(15) | 3,746      |
|                     | VASTY2(16) | 4,578      |
|                     | VASTY2(17) | .          |
|                     | VASTY2(18) | .          |
|                     | VASTY2(19) | 1,775      |
|                     | VASTY2(20) | 2,779      |
|                     | VASTY2(21) | 2,557      |
|                     | VASTY2(22) | 5,475      |
|                     | VASTY2(23) | 13,219     |
|                     | VASTY2(24) | 10,148     |
|                     | VASTY2(25) | 5,439      |
|                     | VASTY2(26) | 3,483      |
|                     | VASTY2(27) | 1,568      |
|                     | VASTY2(28) | 2,367      |
|                     | VASTY2(29) | .          |
|                     | VASTY2(30) | 4,941      |
|                     | VASTY2(31) | 8,770      |
|                     | VASTY2(32) | 3,612      |
|                     | VASTY2(33) | 3,088      |
|                     | VASTY2(34) | 1,655      |
|                     | VASTY2(35) | 8,145      |
|                     | weekday    |            |
|                     | weekday(1) | 1,413      |
|                     | weekday(2) | 1,339      |

Variables in the Equation

|            | B      | S.E. | Wald   | df | Sig. | Exp(B) | 95% C.I. |
|------------|--------|------|--------|----|------|--------|----------|
|            |        |      |        |    |      |        | Lower    |
| weekday(3) | ,004   | ,229 | ,000   | 1  | ,985 | 1,004  | ,641     |
| weekday(4) | -,079  | ,235 | ,113   | 1  | ,737 | ,924   | ,582     |
| weekday(5) | -,383  | ,258 | 2,212  | 1  | ,137 | ,682   | ,411     |
| weekday(6) | -,125  | ,239 | ,273   | 1  | ,602 | ,883   | ,553     |
| holiday(1) | -,822  | ,596 | 1,906  | 1  | ,167 | ,439   | ,137     |
| season     |        |      | 6,179  | 4  | ,186 |        |          |
| season(1)  | ,059   | ,197 | ,089   | 1  | ,765 | 1,061  | ,720     |
| season(2)  | -,265  | ,199 | 1,767  | 1  | ,184 | ,767   | ,520     |
| season(3)  | ,220   | ,190 | 1,344  | 1  | ,246 | 1,246  | ,859     |
| season(4)  | -,121  | ,213 | ,322   | 1  | ,570 | ,886   | ,583     |
| Constant   | -4,145 | ,495 | 70,173 | 1  | ,000 | ,016   |          |

Variables in the Equation

|            | 95% C.I. |
|------------|----------|
|            | Upper    |
| weekday(3) | 1,573    |
| weekday(4) | 1,466    |
| weekday(5) | 1,130    |
| weekday(6) | 1,410    |
| holiday(1) | 1,412    |
| season     |          |
| season(1)  | 1,562    |
| season(2)  | 1,134    |
| season(3)  | 1,806    |
| season(4)  | 1,346    |
| Constant   |          |

a. Variable(s) entered on step 1: sv3, VASTY2, weekday, holiday, season.

```
LOGISTIC REGRESSION VARIABLES handlt1
/METHOD=ENTER sv5 VASTY2 weekday holiday season
/CONTRAST (sv5)=Indicator(1)
/CONTRAST (VASTY2)=Indicator(1)
/CONTRAST (weekday)=Indicator(1)
/CONTRAST (holiday)=Indicator(1)
/CONTRAST (season)=Indicator(1)
/PRINT=CI(95)
/CRITERIA=PIN(0.05) POUT(0.10) ITERATE(20) CUT(0.5).
```

**Block 1: Method = Enter**

## Omnibus Tests of Model Coefficients

|        |       | Chi-square | df | Sig. |
|--------|-------|------------|----|------|
| Step 1 | Step  | 224,307    | 50 | ,000 |
|        | Block | 224,307    | 50 | ,000 |
|        | Model | 224,307    | 50 | ,000 |

## Model Summary

| Step | -2 Log likelihood    | Cox & Snell R Square | Nagelkerke R Square |
|------|----------------------|----------------------|---------------------|
| 1    | 2194,48 <sup>a</sup> | ,018                 | ,101                |

a. Estimation terminated at iteration number 20 because maximum iterations has been reached. Final solution cannot be found.

Classification Table<sup>a</sup>

| Observed           |                                |                           | Predicted                      |                           |
|--------------------|--------------------------------|---------------------------|--------------------------------|---------------------------|
|                    |                                |                           | handlt1 händelse larger than 1 | 0 ingen eller en händelse |
| Step 1             | handlt1 händelse larger than 1 | 0 ingen eller en händelse | 12229                          | 0                         |
|                    |                                | 1 mer än en händelse      | 246                            | 0                         |
| Overall Percentage |                                |                           |                                |                           |

Classification Table<sup>a</sup>

| Observed           |                                |                           | Predicted          |
|--------------------|--------------------------------|---------------------------|--------------------|
|                    |                                |                           | Percentage Correct |
| Step 1             | handlt1 händelse larger than 1 | 0 ingen eller en händelse | 100,0              |
|                    |                                | 1 mer än en händelse      | ,0                 |
| Overall Percentage |                                |                           | 98,0               |

a. The cut value is ,500

## Variables in the Equation

|                     |            | B       | S.E.     | Wald    | df | Sig. | Exp(B) | 95% C.I. |
|---------------------|------------|---------|----------|---------|----|------|--------|----------|
|                     |            |         |          |         |    |      |        | Lower    |
| Step 1 <sup>a</sup> | sv5        |         |          | 2,348   | 4  | ,672 |        |          |
|                     | sv5(1)     | -,043   | ,232     | ,035    | 1  | ,852 | ,958   | ,608     |
|                     | sv5(2)     | ,042    | ,231     | ,034    | 1  | ,854 | 1,043  | ,664     |
|                     | sv5(3)     | -,047   | ,218     | ,046    | 1  | ,830 | ,954   | ,623     |
|                     | sv5(4)     | ,260    | ,236     | 1,209   | 1  | ,272 | 1,297  | ,816     |
|                     | VASTY2     |         |          | 118,861 | 35 | ,000 |        |          |
|                     | VASTY2(1)  | ,432    | ,577     | ,560    | 1  | ,454 | 1,541  | ,497     |
|                     | VASTY2(2)  | ,666    | ,556     | 1,435   | 1  | ,231 | 1,947  | ,654     |
|                     | VASTY2(3)  | -1,616  | 1,098    | 2,164   | 1  | ,141 | ,199   | ,023     |
|                     | VASTY2(4)  | ,481    | ,576     | ,698    | 1  | ,403 | 1,618  | ,523     |
|                     | VASTY2(5)  | -,427   | ,737     | ,335    | 1  | ,563 | ,653   | ,154     |
|                     | VASTY2(6)  | -17,125 | 2096,686 | ,000    | 1  | ,993 | ,000   | ,000     |
|                     | VASTY2(7)  | ,921    | ,538     | 2,932   | 1  | ,087 | 2,513  | ,875     |
|                     | VASTY2(8)  | ,345    | ,593     | ,340    | 1  | ,560 | 1,412  | ,442     |
|                     | VASTY2(9)  | ,246    | ,611     | ,163    | 1  | ,687 | 1,279  | ,386     |
|                     | VASTY2(10) | 1,415   | ,516     | 7,527   | 1  | ,006 | 4,117  | 1,498    |
|                     | VASTY2(11) | 1,474   | ,504     | 8,557   | 1  | ,003 | 4,366  | 1,626    |
|                     | VASTY2(12) | -,625   | ,740     | ,712    | 1  | ,399 | ,535   | ,125     |
|                     | VASTY2(13) | -,183   | ,653     | ,078    | 1  | ,780 | ,833   | ,232     |
|                     | VASTY2(14) | ,091    | ,615     | ,022    | 1  | ,882 | 1,096  | ,328     |
|                     | VASTY2(15) | ,044    | ,621     | ,005    | 1  | ,943 | 1,045  | ,310     |
|                     | VASTY2(16) | ,029    | ,741     | ,002    | 1  | ,969 | 1,029  | ,241     |
|                     | VASTY2(17) | -16,926 | 2093,759 | ,000    | 1  | ,994 | ,000   | ,000     |
|                     | VASTY2(18) | -16,872 | 2104,121 | ,000    | 1  | ,994 | ,000   | ,000     |
|                     | VASTY2(19) | -1,572  | 1,110    | 2,004   | 1  | ,157 | ,208   | ,024     |
|                     | VASTY2(20) | -,489   | ,741     | ,436    | 1  | ,509 | ,613   | ,144     |
|                     | VASTY2(21) | -,506   | ,735     | ,474    | 1  | ,491 | ,603   | ,143     |
|                     | VASTY2(22) | ,592    | ,563     | 1,105   | 1  | ,293 | 1,807  | ,599     |
|                     | VASTY2(23) | 1,598   | ,499     | 10,280  | 1  | ,001 | 4,945  | 1,861    |
|                     | VASTY2(24) | 1,287   | ,511     | 6,341   | 1  | ,012 | 3,621  | 1,330    |
|                     | VASTY2(25) | ,511    | ,594     | ,740    | 1  | ,390 | 1,666  | ,521     |
|                     | VASTY2(26) | -,083   | ,677     | ,015    | 1  | ,903 | ,921   | ,244     |
|                     | VASTY2(27) | -1,763  | 1,102    | 2,559   | 1  | ,110 | ,172   | ,020     |
|                     | VASTY2(28) | -1,444  | 1,112    | 1,685   | 1  | ,194 | ,236   | ,027     |
|                     | VASTY2(29) | -17,199 | 2095,974 | ,000    | 1  | ,993 | ,000   | ,000     |
|                     | VASTY2(30) | ,457    | ,577     | ,625    | 1  | ,429 | 1,579  | ,509     |
|                     | VASTY2(31) | 1,132   | ,538     | 4,424   | 1  | ,035 | 3,102  | 1,080    |
|                     | VASTY2(32) | ,030    | ,657     | ,002    | 1  | ,964 | 1,030  | ,284     |
|                     | VASTY2(33) | -,197   | ,695     | ,081    | 1  | ,776 | ,821   | ,210     |
|                     | VASTY2(34) | -1,656  | 1,098    | 2,273   | 1  | ,132 | ,191   | ,022     |
|                     | VASTY2(35) | 1,055   | ,534     | 3,895   | 1  | ,048 | 2,871  | 1,007    |
|                     | weekday    |         |          | 2,898   | 6  | ,822 |        |          |



Variables in the Equation

|                     |            | 95% C.I... |
|---------------------|------------|------------|
|                     |            | Upper      |
| Step 1 <sup>a</sup> | sv5        |            |
|                     | sv5(1)     | 1,508      |
|                     | sv5(2)     | 1,640      |
|                     | sv5(3)     | 1,462      |
|                     | sv5(4)     | 2,061      |
|                     | VASTY2     |            |
|                     | VASTY2(1)  | 4,779      |
|                     | VASTY2(2)  | 5,792      |
|                     | VASTY2(3)  | 1,711      |
|                     | VASTY2(4)  | 5,000      |
|                     | VASTY2(5)  | 2,769      |
|                     | VASTY2(6)  | .          |
|                     | VASTY2(7)  | 7,215      |
|                     | VASTY2(8)  | 4,512      |
|                     | VASTY2(9)  | 4,235      |
|                     | VASTY2(10) | 11,313     |
|                     | VASTY2(11) | 11,723     |
|                     | VASTY2(12) | 2,285      |
|                     | VASTY2(13) | 2,993      |
|                     | VASTY2(14) | 3,660      |
|                     | VASTY2(15) | 3,528      |
|                     | VASTY2(16) | 4,399      |
|                     | VASTY2(17) | .          |
|                     | VASTY2(18) | .          |
|                     | VASTY2(19) | 1,830      |
|                     | VASTY2(20) | 2,618      |
|                     | VASTY2(21) | 2,546      |
|                     | VASTY2(22) | 5,451      |
|                     | VASTY2(23) | 13,138     |
|                     | VASTY2(24) | 9,859      |
|                     | VASTY2(25) | 5,333      |
|                     | VASTY2(26) | 3,466      |
|                     | VASTY2(27) | 1,487      |
|                     | VASTY2(28) | 2,088      |
|                     | VASTY2(29) | .          |
|                     | VASTY2(30) | 4,896      |
|                     | VASTY2(31) | 8,909      |
|                     | VASTY2(32) | 3,733      |
|                     | VASTY2(33) | 3,206      |
|                     | VASTY2(34) | 1,643      |
|                     | VASTY2(35) | 8,181      |
|                     | weekday    |            |

Peer review only

Variables in the Equation

|            | B      | S.E. | Wald   | df | Sig. | Exp(B) | 95% C.I. |
|------------|--------|------|--------|----|------|--------|----------|
|            |        |      |        |    |      |        | Lower    |
| weekday(1) | -,108  | ,235 | ,213   | 1  | ,644 | ,897   | ,567     |
| weekday(2) | -,168  | ,238 | ,498   | 1  | ,480 | ,845   | ,530     |
| weekday(3) | ,009   | ,229 | ,001   | 1  | ,970 | 1,009  | ,644     |
| weekday(4) | -,071  | ,236 | ,091   | 1  | ,763 | ,931   | ,587     |
| weekday(5) | -,374  | ,258 | 2,098  | 1  | ,147 | ,688   | ,415     |
| weekday(6) | -,126  | ,239 | ,276   | 1  | ,599 | ,882   | ,552     |
| holiday(1) | -,823  | ,596 | 1,910  | 1  | ,167 | ,439   | ,137     |
| season     |        |      | 5,918  | 4  | ,205 |        |          |
| season(1)  | ,069   | ,198 | ,122   | 1  | ,727 | 1,071  | ,727     |
| season(2)  | -,251  | ,200 | 1,574  | 1  | ,210 | ,778   | ,526     |
| season(3)  | ,223   | ,190 | 1,385  | 1  | ,239 | 1,250  | ,862     |
| season(4)  | -,111  | ,214 | ,270   | 1  | ,603 | ,895   | ,589     |
| Constant   | -4,123 | ,505 | 66,525 | 1  | ,000 | ,016   |          |

Variables in the Equation

|            | 95% C.I. |
|------------|----------|
|            | Upper    |
| weekday(1) | 1,421    |
| weekday(2) | 1,348    |
| weekday(3) | 1,580    |
| weekday(4) | 1,478    |
| weekday(5) | 1,141    |
| weekday(6) | 1,409    |
| holiday(1) | 1,411    |
| season     |          |
| season(1)  | 1,579    |
| season(2)  | 1,151    |
| season(3)  | 1,813    |
| season(4)  | 1,360    |
| Constant   |          |

a. Variable(s) entered on step 1: sv5, VASTY2, weekday, holiday, season.

```
LOGISTIC REGRESSION VARIABLES handlt1
/METHOD=ENTER sv7 VASTY2 weekday holiday season
/CONTRAST (sv7)=Indicator(1)
/CONTRAST (VASTY2)=Indicator(1)
/CONTRAST (weekday)=Indicator(1)
/CONTRAST (holiday)=Indicator(1)
/CONTRAST (season)=Indicator(1)
```

/PRINT=CI(95)

/CRITERIA=PIN(0.05) POUT(0.10) ITERATE(20) CUT(0.5).

**Block 1: Method = Enter**

**Omnibus Tests of Model Coefficients**

|        |       | Chi-square | df | Sig. |
|--------|-------|------------|----|------|
| Step 1 | Step  | 231,067    | 52 | ,000 |
|        | Block | 231,067    | 52 | ,000 |
|        | Model | 231,067    | 52 | ,000 |

**Model Summary**

| Step | -2 Log likelihood    | Cox & Snell R Square | Nagelkerke R Square |
|------|----------------------|----------------------|---------------------|
| 1    | 2187,72 <sup>a</sup> | ,018                 | ,104                |

a. Estimation terminated at iteration number 20 because maximum iterations has been reached. Final solution cannot be found.

**Classification Table<sup>a</sup>**

| Observed           |                                | Predicted                      |                           |
|--------------------|--------------------------------|--------------------------------|---------------------------|
|                    |                                | handlt1 händelse larger than 1 | 0 ingen eller en händelse |
| Step 1             | handlt1 händelse larger than 1 | 12229                          | 0                         |
|                    | 0 ingen eller en händelse      | 246                            | 0                         |
| Overall Percentage |                                |                                |                           |

**Classification Table<sup>a</sup>**

| Observed           |                                | Predicted          |
|--------------------|--------------------------------|--------------------|
|                    |                                | Percentage Correct |
| Step 1             | handlt1 händelse larger than 1 | 100,0              |
|                    | 0 ingen eller en händelse      | ,0                 |
| Overall Percentage |                                | 98,0               |

a. The cut value is ,500

## Variables in the Equation

|                     |            | B       | S.E.     | Wald    | df | Sig. | Exp(B) | 95% C.I. |
|---------------------|------------|---------|----------|---------|----|------|--------|----------|
|                     |            |         |          |         |    |      |        | Lower    |
| Step 1 <sup>a</sup> | sv7        |         |          | 9,407   | 6  | ,152 |        |          |
|                     | sv7(1)     | -,011   | ,268     | ,002    | 1  | ,969 | ,990   | ,586     |
|                     | sv7(2)     | ,033    | ,283     | ,014    | 1  | ,907 | 1,034  | ,594     |
|                     | sv7(3)     | ,076    | ,272     | ,077    | 1  | ,781 | 1,079  | ,633     |
|                     | sv7(4)     | -,037   | ,269     | ,019    | 1  | ,891 | ,964   | ,569     |
|                     | sv7(5)     | ,181    | ,248     | ,531    | 1  | ,466 | 1,198  | ,737     |
|                     | sv7(6)     | ,702    | ,281     | 6,219   | 1  | ,013 | 2,017  | 1,162    |
|                     | VASTY2     |         |          | 121,309 | 35 | ,000 |        |          |
|                     | VASTY2(1)  | ,372    | ,578     | ,413    | 1  | ,520 | 1,450  | ,467     |
|                     | VASTY2(2)  | ,480    | ,559     | ,735    | 1  | ,391 | 1,616  | ,540     |
|                     | VASTY2(3)  | -1,607  | 1,099    | 2,140   | 1  | ,144 | ,200   | ,023     |
|                     | VASTY2(4)  | ,459    | ,576     | ,635    | 1  | ,425 | 1,583  | ,512     |
|                     | VASTY2(5)  | -,413   | ,737     | ,313    | 1  | ,576 | ,662   | ,156     |
|                     | VASTY2(6)  | -17,450 | 2090,548 | ,000    | 1  | ,993 | ,000   | ,000     |
|                     | VASTY2(7)  | ,915    | ,538     | 2,891   | 1  | ,089 | 2,497  | ,870     |
|                     | VASTY2(8)  | ,357    | ,593     | ,363    | 1  | ,547 | 1,429  | ,447     |
|                     | VASTY2(9)  | ,240    | ,611     | ,154    | 1  | ,694 | 1,271  | ,384     |
|                     | VASTY2(10) | 1,198   | ,520     | 5,311   | 1  | ,021 | 3,313  | 1,196    |
|                     | VASTY2(11) | 1,462   | ,504     | 8,400   | 1  | ,004 | 4,315  | 1,605    |
|                     | VASTY2(12) | -,754   | ,742     | 1,034   | 1  | ,309 | ,470   | ,110     |
|                     | VASTY2(13) | -,434   | ,657     | ,437    | 1  | ,509 | ,648   | ,179     |
|                     | VASTY2(14) | -,039   | ,617     | ,004    | 1  | ,950 | ,962   | ,287     |
|                     | VASTY2(15) | -,160   | ,625     | ,065    | 1  | ,798 | ,853   | ,251     |
|                     | VASTY2(16) | -,122   | ,744     | ,027    | 1  | ,870 | ,885   | ,206     |
|                     | VASTY2(17) | -16,959 | 2089,320 | ,000    | 1  | ,994 | ,000   | ,000     |
|                     | VASTY2(18) | -16,867 | 2104,368 | ,000    | 1  | ,994 | ,000   | ,000     |
|                     | VASTY2(19) | -1,565  | 1,114    | 1,974   | 1  | ,160 | ,209   | ,024     |
|                     | VASTY2(20) | -,673   | ,744     | ,817    | 1  | ,366 | ,510   | ,119     |
|                     | VASTY2(21) | -,515   | ,735     | ,491    | 1  | ,484 | ,598   | ,142     |
|                     | VASTY2(22) | ,589    | ,563     | 1,095   | 1  | ,295 | 1,803  | ,598     |
|                     | VASTY2(23) | 1,600   | ,499     | 10,297  | 1  | ,001 | 4,953  | 1,864    |
|                     | VASTY2(24) | 1,214   | ,512     | 5,619   | 1  | ,018 | 3,366  | 1,234    |
|                     | VASTY2(25) | ,518    | ,594     | ,761    | 1  | ,383 | 1,679  | ,524     |
|                     | VASTY2(26) | -,126   | ,677     | ,034    | 1  | ,853 | ,882   | ,234     |
|                     | VASTY2(27) | -1,951  | 1,105    | 3,122   | 1  | ,077 | ,142   | ,016     |
|                     | VASTY2(28) | -1,815  | 1,118    | 2,633   | 1  | ,105 | ,163   | ,018     |
|                     | VASTY2(29) | -17,588 | 2095,379 | ,000    | 1  | ,993 | ,000   | ,000     |
|                     | VASTY2(30) | ,462    | ,578     | ,641    | 1  | ,423 | 1,588  | ,512     |
|                     | VASTY2(31) | 1,133   | ,539     | 4,414   | 1  | ,036 | 3,105  | 1,079    |
|                     | VASTY2(32) | ,036    | ,661     | ,003    | 1  | ,957 | 1,037  | ,284     |
|                     | VASTY2(33) | -,191   | ,701     | ,074    | 1  | ,786 | ,826   | ,209     |
|                     | VASTY2(34) | -1,674  | 1,098    | 2,323   | 1  | ,127 | ,187   | ,022     |

## Variables in the Equation

|                     |            | 95% C.I... |
|---------------------|------------|------------|
|                     |            | Upper      |
| Step 1 <sup>a</sup> | sv7        |            |
|                     | sv7(1)     | 1,672      |
|                     | sv7(2)     | 1,799      |
|                     | sv7(3)     | 1,840      |
|                     | sv7(4)     | 1,634      |
|                     | sv7(5)     | 1,948      |
|                     | sv7(6)     | 3,502      |
|                     | VASTY2     |            |
|                     | VASTY2(1)  | 4,503      |
|                     | VASTY2(2)  | 4,836      |
|                     | VASTY2(3)  | 1,727      |
|                     | VASTY2(4)  | 4,897      |
|                     | VASTY2(5)  | 2,809      |
|                     | VASTY2(6)  | .          |
|                     | VASTY2(7)  | 7,170      |
|                     | VASTY2(8)  | 4,570      |
|                     | VASTY2(9)  | 4,209      |
|                     | VASTY2(10) | 9,176      |
|                     | VASTY2(11) | 11,600     |
|                     | VASTY2(12) | 2,012      |
|                     | VASTY2(13) | 2,347      |
|                     | VASTY2(14) | 3,226      |
|                     | VASTY2(15) | 2,901      |
|                     | VASTY2(16) | 3,808      |
|                     | VASTY2(17) | .          |
|                     | VASTY2(18) | .          |
|                     | VASTY2(19) | 1,856      |
|                     | VASTY2(20) | 2,195      |
|                     | VASTY2(21) | 2,523      |
|                     | VASTY2(22) | 5,437      |
|                     | VASTY2(23) | 13,162     |
|                     | VASTY2(24) | 9,180      |
|                     | VASTY2(25) | 5,375      |
|                     | VASTY2(26) | 3,324      |
|                     | VASTY2(27) | 1,238      |
|                     | VASTY2(28) | 1,458      |
|                     | VASTY2(29) | .          |
|                     | VASTY2(30) | 4,926      |
|                     | VASTY2(31) | 8,935      |
|                     | VASTY2(32) | 3,789      |
|                     | VASTY2(33) | 3,265      |
|                     | VASTY2(34) | 1,614      |

Variables in the Equation

|            | B      | S.E. | Wald   | df | Sig. | Exp(B) | 95% C.I. |
|------------|--------|------|--------|----|------|--------|----------|
|            |        |      |        |    |      |        | Lower    |
| VASTY2(35) | ,990   | ,535 | 3,416  | 1  | ,065 | 2,690  | ,942     |
| weekday    |        |      | 2,922  | 6  | ,819 |        |          |
| weekday(1) | -,105  | ,235 | ,199   | 1  | ,655 | ,900   | ,568     |
| weekday(2) | -,154  | ,239 | ,419   | 1  | ,517 | ,857   | ,537     |
| weekday(3) | ,026   | ,229 | ,013   | 1  | ,910 | 1,026  | ,655     |
| weekday(4) | -,040  | ,236 | ,029   | 1  | ,864 | ,960   | ,605     |
| weekday(5) | -,362  | ,258 | 1,958  | 1  | ,162 | ,697   | ,420     |
| weekday(6) | -,128  | ,240 | ,285   | 1  | ,594 | ,880   | ,550     |
| holiday(1) | -,821  | ,596 | 1,895  | 1  | ,169 | ,440   | ,137     |
| season     |        |      | 5,341  | 4  | ,254 |        |          |
| season(1)  | ,084   | ,198 | ,180   | 1  | ,671 | 1,088  | ,738     |
| season(2)  | -,219  | ,200 | 1,201  | 1  | ,273 | ,803   | ,542     |
| season(3)  | ,226   | ,190 | 1,422  | 1  | ,233 | 1,254  | ,864     |
| season(4)  | -,102  | ,214 | ,229   | 1  | ,632 | ,903   | ,594     |
| Constant   | -4,184 | ,515 | 65,910 | 1  | ,000 | ,015   |          |

Variables in the Equation

|            | 95% C.I. |
|------------|----------|
|            | Upper    |
| VASTY2(35) | 7,682    |
| weekday    |          |
| weekday(1) | 1,427    |
| weekday(2) | 1,368    |
| weekday(3) | 1,608    |
| weekday(4) | 1,525    |
| weekday(5) | 1,156    |
| weekday(6) | 1,407    |
| holiday(1) | 1,416    |
| season     |          |
| season(1)  | 1,603    |
| season(2)  | 1,189    |
| season(3)  | 1,820    |
| season(4)  | 1,373    |
| Constant   |          |

a. Variable(s) entered on step 1: sv7, VASTY2, weekday, holiday, season.

\*\*

LOGISTIC REGRESSION VARIABLES dod01

```

1 /METHOD=ENTER bv1 VASTY2 weekday holiday season
2
3
4 /CONTRAST (bv1)=Indicator(1)
5
6 /CONTRAST (VASTY2)=Indicator(1)
7
8 /CONTRAST (weekday)=Indicator(1)
9
10 /CONTRAST (holiday)=Indicator(1)
11
12 /CONTRAST (season)=Indicator(1)
13
14 /PRINT=CI(95)
15
16 /CRITERIA=PIN(0.05) POUT(0.10) ITERATE(20) CUT(0.5).

```

## Block 1: Method = Enter

### Omnibus Tests of Model Coefficients

|        |       | Chi-square | df | Sig. |
|--------|-------|------------|----|------|
| Step 1 | Step  | 738,299    | 48 | ,000 |
|        | Block | 738,299    | 48 | ,000 |
|        | Model | 738,299    | 48 | ,000 |

### Model Summary

| Step | -2 Log likelihood    | Cox & Snell R Square | Nagelkerke R Square |
|------|----------------------|----------------------|---------------------|
| 1    | 4286,54 <sup>a</sup> | ,057                 | ,173                |

a. Estimation terminated at iteration number 20 because maximum iterations has been reached. Final solution cannot be found.

### Classification Table<sup>a</sup>

| Observed           |                             | Predicted                   |                      |                    |       |
|--------------------|-----------------------------|-----------------------------|----------------------|--------------------|-------|
|                    |                             | dod01 dödsfall ja eller nej |                      | Percentage Correct |       |
|                    |                             | 0 inget dödsfall            | 1 minst ett dödsfall |                    |       |
| Step 1             | dod01 dödsfall ja eller nej | 0 inget dödsfall            | 11839                | 0                  | 100,0 |
|                    |                             | 1 minst ett dödsfall        | 636                  | 0                  | ,0    |
| Overall Percentage |                             |                             |                      |                    | 94,9  |

a. The cut value is ,500

## Variables in the Equation

|                     |            | B       | S.E.     | Wald    | df | Sig. | Exp(B) | 95% C.I. |
|---------------------|------------|---------|----------|---------|----|------|--------|----------|
|                     |            |         |          |         |    |      |        | Lower    |
| Step 1 <sup>a</sup> | bv1        |         |          | 22,025  | 2  | ,000 |        |          |
|                     | bv1(1)     | -,254   | ,130     | 3,791   | 1  | ,052 | ,776   | ,601     |
|                     | bv1(2)     | ,355    | ,098     | 13,074  | 1  | ,000 | 1,426  | 1,176    |
|                     | VASTY2     |         |          | 210,364 | 35 | ,000 |        |          |
|                     | VASTY2(1)  | ,595    | ,343     | 3,010   | 1  | ,083 | 1,813  | ,926     |
|                     | VASTY2(2)  | ,712    | ,335     | 4,516   | 1  | ,034 | 2,038  | 1,057    |
|                     | VASTY2(3)  | ,607    | ,335     | 3,275   | 1  | ,070 | 1,835  | ,951     |
|                     | VASTY2(4)  | ,016    | ,372     | ,002    | 1  | ,967 | 1,016  | ,490     |
|                     | VASTY2(5)  | -,856   | ,495     | 2,992   | 1  | ,084 | ,425   | ,161     |
|                     | VASTY2(6)  | -18,136 | 2096,795 | ,000    | 1  | ,993 | ,000   | ,000     |
|                     | VASTY2(7)  | 1,447   | ,311     | 21,666  | 1  | ,000 | 4,250  | 2,311    |
|                     | VASTY2(8)  | ,734    | ,332     | 4,874   | 1  | ,027 | 2,083  | 1,086    |
|                     | VASTY2(9)  | ,266    | ,362     | ,538    | 1  | ,463 | 1,305  | ,641     |
|                     | VASTY2(10) | ,718    | ,334     | 4,632   | 1  | ,031 | 2,051  | 1,066    |
|                     | VASTY2(11) | ,314    | ,358     | ,770    | 1  | ,380 | 1,368  | ,679     |
|                     | VASTY2(12) | 1,212   | ,315     | 14,756  | 1  | ,000 | 3,360  | 1,810    |
|                     | VASTY2(13) | 1,347   | ,312     | 18,705  | 1  | ,000 | 3,848  | 2,089    |
|                     | VASTY2(14) | ,681    | ,334     | 4,149   | 1  | ,042 | 1,976  | 1,026    |
|                     | VASTY2(15) | ,112    | ,370     | ,092    | 1  | ,762 | 1,119  | ,542     |
|                     | VASTY2(16) | -,938   | ,645     | 2,118   | 1  | ,146 | ,391   | ,111     |
|                     | VASTY2(17) | -17,973 | 2093,394 | ,000    | 1  | ,993 | ,000   | ,000     |
|                     | VASTY2(18) | -2,705  | 1,038    | 6,788   | 1  | ,009 | ,067   | ,009     |
|                     | VASTY2(19) | -2,465  | 1,041    | 5,603   | 1  | ,018 | ,085   | ,011     |
|                     | VASTY2(20) | -1,513  | ,643     | 5,548   | 1  | ,018 | ,220   | ,062     |
|                     | VASTY2(21) | ,497    | ,346     | 2,070   | 1  | ,150 | 1,644  | ,835     |
|                     | VASTY2(22) | 1,237   | ,322     | 14,789  | 1  | ,000 | 3,447  | 1,834    |
|                     | VASTY2(23) | ,529    | ,348     | 2,312   | 1  | ,128 | 1,698  | ,858     |
|                     | VASTY2(24) | 1,281   | ,313     | 16,785  | 1  | ,000 | 3,602  | 1,951    |
|                     | VASTY2(25) | -,227   | ,435     | ,271    | 1  | ,603 | ,797   | ,340     |
|                     | VASTY2(26) | -18,096 | 2344,694 | ,000    | 1  | ,994 | ,000   | ,000     |
|                     | VASTY2(27) | -18,135 | 2090,509 | ,000    | 1  | ,993 | ,000   | ,000     |
|                     | VASTY2(28) | -18,092 | 2670,146 | ,000    | 1  | ,995 | ,000   | ,000     |
|                     | VASTY2(29) | -18,069 | 2093,350 | ,000    | 1  | ,993 | ,000   | ,000     |
|                     | VASTY2(30) | -,084   | ,386     | ,047    | 1  | ,828 | ,920   | ,431     |
|                     | VASTY2(31) | -18,052 | 2088,876 | ,000    | 1  | ,993 | ,000   | ,000     |
|                     | VASTY2(32) | -1,973  | ,761     | 6,730   | 1  | ,009 | ,139   | ,031     |
|                     | VASTY2(33) | -2,697  | 1,038    | 6,747   | 1  | ,009 | ,067   | ,009     |
|                     | VASTY2(34) | ,421    | ,351     | 1,440   | 1  | ,230 | 1,524  | ,766     |
|                     | VASTY2(35) | -18,181 | 2253,097 | ,000    | 1  | ,994 | ,000   | ,000     |
|                     | weekday    |         |          | 3,187   | 6  | ,785 |        |          |
|                     | weekday(1) | ,020    | ,153     | ,016    | 1  | ,898 | 1,020  | ,756     |
|                     | weekday(2) | -,071   | ,156     | ,206    | 1  | ,650 | ,932   | ,686     |



Variables in the Equation

|                     |            | 95% C.I... |
|---------------------|------------|------------|
|                     |            | Upper      |
| Step 1 <sup>a</sup> | bv1        |            |
|                     | bv1(1)     | 1,002      |
|                     | bv1(2)     | 1,728      |
|                     | VASTY2     |            |
|                     | VASTY2(1)  | 3,552      |
|                     | VASTY2(2)  | 3,929      |
|                     | VASTY2(3)  | 3,542      |
|                     | VASTY2(4)  | 2,104      |
|                     | VASTY2(5)  | 1,121      |
|                     | VASTY2(6)  | .          |
|                     | VASTY2(7)  | 7,816      |
|                     | VASTY2(8)  | 3,995      |
|                     | VASTY2(9)  | 2,654      |
|                     | VASTY2(10) | 3,944      |
|                     | VASTY2(11) | 2,758      |
|                     | VASTY2(12) | 6,235      |
|                     | VASTY2(13) | 7,086      |
|                     | VASTY2(14) | 3,807      |
|                     | VASTY2(15) | 2,309      |
|                     | VASTY2(16) | 1,385      |
|                     | VASTY2(17) | .          |
|                     | VASTY2(18) | ,512       |
|                     | VASTY2(19) | ,654       |
|                     | VASTY2(20) | ,776       |
|                     | VASTY2(21) | 3,238      |
|                     | VASTY2(22) | 6,476      |
|                     | VASTY2(23) | 3,359      |
|                     | VASTY2(24) | 6,649      |
|                     | VASTY2(25) | 1,871      |
|                     | VASTY2(26) | .          |
|                     | VASTY2(27) | .          |
|                     | VASTY2(28) | .          |
|                     | VASTY2(29) | .          |
|                     | VASTY2(30) | 1,961      |
|                     | VASTY2(31) | .          |
|                     | VASTY2(32) | ,617       |
|                     | VASTY2(33) | ,516       |
|                     | VASTY2(34) | 3,031      |
|                     | VASTY2(35) | .          |
|                     | weekday    |            |
|                     | weekday(1) | 1,375      |
|                     | weekday(2) | 1,265      |

Peer review only

Variables in the Equation

|            | B      | S.E. | Wald    | df | Sig. | Exp(B) | 95% C.I. |
|------------|--------|------|---------|----|------|--------|----------|
|            |        |      |         |    |      |        | Lower    |
| weekday(3) | ,040   | ,153 | ,070    | 1  | ,792 | 1,041  | ,772     |
| weekday(4) | ,029   | ,154 | ,035    | 1  | ,853 | 1,029  | ,761     |
| weekday(5) | -,059  | ,158 | ,140    | 1  | ,708 | ,942   | ,691     |
| weekday(6) | -,198  | ,162 | 1,507   | 1  | ,220 | ,820   | ,597     |
| holiday(1) | -,239  | ,256 | ,871    | 1  | ,351 | ,788   | ,477     |
| season     |        |      | 7,376   | 4  | ,117 |        |          |
| season(1)  | ,039   | ,129 | ,093    | 1  | ,760 | 1,040  | ,808     |
| season(2)  | ,094   | ,118 | ,634    | 1  | ,426 | 1,099  | ,871     |
| season(3)  | -,061  | ,132 | ,213    | 1  | ,645 | ,941   | ,726     |
| season(4)  | -,279  | ,142 | 3,840   | 1  | ,050 | ,756   | ,572     |
| Constant   | -3,143 | ,302 | 108,344 | 1  | ,000 | ,043   |          |

Variables in the Equation

|            | 95% C.I. |
|------------|----------|
|            | Upper    |
| weekday(3) | 1,405    |
| weekday(4) | 1,392    |
| weekday(5) | 1,285    |
| weekday(6) | 1,126    |
| holiday(1) | 1,300    |
| season     |          |
| season(1)  | 1,338    |
| season(2)  | 1,386    |
| season(3)  | 1,220    |
| season(4)  | 1,000    |
| Constant   |          |

a. Variable(s) entered on step 1: bv1, VASTY2, weekday, holiday, season.

LOGISTIC REGRESSION VARIABLES dod01

/METHOD=ENTER bv2 VASTY2 weekday holiday season

/CONTRAST (bv2)=Indicator(1)

/CONTRAST (VASTY2)=Indicator(1)

/CONTRAST (weekday)=Indicator(1)

/CONTRAST (holiday)=Indicator(1)

/CONTRAST (season)=Indicator(1)

/PRINT=CI(95)

/CRITERIA=PIN(0.05) POUT(0.10) ITERATE(20) CUT(0.5).

**Block 1: Method = Enter**

1  
2  
3  
4  
5  
6  
7  
8  
9  
10  
11  
12  
13

### Omnibus Tests of Model Coefficients

|        |       | Chi-square | df | Sig. |
|--------|-------|------------|----|------|
| Step 1 | Step  | 732,200    | 48 | ,000 |
|        | Block | 732,200    | 48 | ,000 |
|        | Model | 732,200    | 48 | ,000 |

14  
15  
16  
17  
18  
19  
20  
21  
22  
23  
24  
25

### Model Summary

| Step | -2 Log likelihood    | Cox & Snell R Square | Nagelkerke R Square |
|------|----------------------|----------------------|---------------------|
| 1    | 4292,64 <sup>a</sup> | ,057                 | ,172                |

a. Estimation terminated at iteration number 20 because maximum iterations has been reached. Final solution cannot be found.

26  
27  
28  
29  
30  
31  
32  
33  
34  
35  
36  
37  
38  
39  
40  
41  
42  
43  
44  
45  
46  
47  
48  
49  
50  
51  
52  
53  
54  
55  
56  
57  
58  
59  
60

### Classification Table<sup>a</sup>

| Observed           |                             | Predicted                   |                      |                    |       |
|--------------------|-----------------------------|-----------------------------|----------------------|--------------------|-------|
|                    |                             | dod01 dödsfall ja eller nej |                      | Percentage Correct |       |
|                    |                             | 0 inget dödsfall            | 1 minst ett dödsfall |                    |       |
| Step 1             | dod01 dödsfall ja eller nej | 0 inget dödsfall            | 11839                | 0                  | 100,0 |
|                    |                             | 1 minst ett dödsfall        | 636                  | 0                  | ,0    |
| Overall Percentage |                             |                             |                      |                    | 94,9  |

a. The cut value is ,500

## Variables in the Equation

|                     | B       | S.E.     | Wald    | df | Sig. | Exp(B) | 95% C.I. |
|---------------------|---------|----------|---------|----|------|--------|----------|
|                     |         |          |         |    |      |        | Lower    |
| Step 1 <sup>a</sup> |         |          |         |    |      |        |          |
| bv2                 |         |          | 15,899  | 2  | ,000 |        |          |
| bv2(1)              | -,136   | ,126     | 1,154   | 1  | ,283 | ,873   | ,681     |
| bv2(2)              | ,297    | ,111     | 7,203   | 1  | ,007 | 1,346  | 1,083    |
| VASTY2              |         |          | 215,791 | 35 | ,000 |        |          |
| VASTY2(1)           | ,590    | ,343     | 2,955   | 1  | ,086 | 1,803  | ,921     |
| VASTY2(2)           | ,718    | ,335     | 4,589   | 1  | ,032 | 2,050  | 1,063    |
| VASTY2(3)           | ,665    | ,334     | 3,958   | 1  | ,047 | 1,945  | 1,010    |
| VASTY2(4)           | ,057    | ,371     | ,024    | 1  | ,877 | 1,059  | ,512     |
| VASTY2(5)           | -,842   | ,495     | 2,891   | 1  | ,089 | ,431   | ,163     |
| VASTY2(6)           | -18,087 | 2099,316 | ,000    | 1  | ,993 | ,000   | ,000     |
| VASTY2(7)           | 1,507   | ,309     | 23,735  | 1  | ,000 | 4,515  | 2,462    |
| VASTY2(8)           | ,742    | ,332     | 4,976   | 1  | ,026 | 2,099  | 1,094    |
| VASTY2(9)           | ,286    | ,362     | ,623    | 1  | ,430 | 1,331  | ,654     |
| VASTY2(10)          | ,732    | ,334     | 4,810   | 1  | ,028 | 2,079  | 1,081    |
| VASTY2(11)          | ,334    | ,357     | ,872    | 1  | ,350 | 1,396  | ,693     |
| VASTY2(12)          | 1,227   | ,315     | 15,127  | 1  | ,000 | 3,411  | 1,838    |
| VASTY2(13)          | 1,378   | ,311     | 19,565  | 1  | ,000 | 3,966  | 2,154    |
| VASTY2(14)          | ,704    | ,334     | 4,438   | 1  | ,035 | 2,022  | 1,050    |
| VASTY2(15)          | ,113    | ,370     | ,094    | 1  | ,759 | 1,120  | ,542     |
| VASTY2(16)          | -,914   | ,644     | 2,011   | 1  | ,156 | ,401   | ,113     |
| VASTY2(17)          | -17,964 | 2095,460 | ,000    | 1  | ,993 | ,000   | ,000     |
| VASTY2(18)          | -2,695  | 1,038    | 6,742   | 1  | ,009 | ,068   | ,009     |
| VASTY2(19)          | -2,518  | 1,040    | 5,863   | 1  | ,015 | ,081   | ,011     |
| VASTY2(20)          | -1,475  | ,642     | 5,277   | 1  | ,022 | ,229   | ,065     |
| VASTY2(21)          | ,509    | ,346     | 2,173   | 1  | ,140 | 1,664  | ,845     |
| VASTY2(22)          | 1,243   | ,322     | 14,890  | 1  | ,000 | 3,467  | 1,844    |
| VASTY2(23)          | ,525    | ,348     | 2,278   | 1  | ,131 | 1,691  | ,855     |
| VASTY2(24)          | 1,318   | ,312     | 17,795  | 1  | ,000 | 3,735  | 2,025    |
| VASTY2(25)          | -,219   | ,435     | ,252    | 1  | ,616 | ,804   | ,342     |
| VASTY2(26)          | -18,080 | 2347,813 | ,000    | 1  | ,994 | ,000   | ,000     |
| VASTY2(27)          | -18,111 | 2093,393 | ,000    | 1  | ,993 | ,000   | ,000     |
| VASTY2(28)          | -18,082 | 2671,282 | ,000    | 1  | ,995 | ,000   | ,000     |
| VASTY2(29)          | -18,045 | 2094,144 | ,000    | 1  | ,993 | ,000   | ,000     |
| VASTY2(30)          | -,064   | ,386     | ,027    | 1  | ,868 | ,938   | ,440     |
| VASTY2(31)          | -18,032 | 2092,735 | ,000    | 1  | ,993 | ,000   | ,000     |
| VASTY2(32)          | -1,966  | ,760     | 6,688   | 1  | ,010 | ,140   | ,032     |
| VASTY2(33)          | -2,688  | 1,038    | 6,703   | 1  | ,010 | ,068   | ,009     |
| VASTY2(34)          | ,434    | ,351     | 1,530   | 1  | ,216 | 1,543  | ,776     |
| VASTY2(35)          | -18,128 | 2256,013 | ,000    | 1  | ,994 | ,000   | ,000     |
| weekday             |         |          | 3,035   | 6  | ,804 |        |          |
| weekday(1)          | ,028    | ,152     | ,035    | 1  | ,853 | 1,029  | ,763     |
| weekday(2)          | -,065   | ,156     | ,174    | 1  | ,677 | ,937   | ,690     |

Variables in the Equation

|                     |            | 95% C.I... |
|---------------------|------------|------------|
|                     |            | Upper      |
| Step 1 <sup>a</sup> | bv2        |            |
|                     | bv2(1)     | 1,119      |
|                     | bv2(2)     | 1,671      |
|                     | VASTY2     |            |
|                     | VASTY2(1)  | 3,532      |
|                     | VASTY2(2)  | 3,952      |
|                     | VASTY2(3)  | 3,747      |
|                     | VASTY2(4)  | 2,191      |
|                     | VASTY2(5)  | 1,137      |
|                     | VASTY2(6)  | .          |
|                     | VASTY2(7)  | 8,279      |
|                     | VASTY2(8)  | 4,027      |
|                     | VASTY2(9)  | 2,706      |
|                     | VASTY2(10) | 3,998      |
|                     | VASTY2(11) | 2,812      |
|                     | VASTY2(12) | 6,329      |
|                     | VASTY2(13) | 7,302      |
|                     | VASTY2(14) | 3,892      |
|                     | VASTY2(15) | 2,313      |
|                     | VASTY2(16) | 1,418      |
|                     | VASTY2(17) | .          |
|                     | VASTY2(18) | ,516       |
|                     | VASTY2(19) | ,619       |
|                     | VASTY2(20) | ,805       |
|                     | VASTY2(21) | 3,277      |
|                     | VASTY2(22) | 6,518      |
|                     | VASTY2(23) | 3,344      |
|                     | VASTY2(24) | 6,890      |
|                     | VASTY2(25) | 1,886      |
|                     | VASTY2(26) | .          |
|                     | VASTY2(27) | .          |
|                     | VASTY2(28) | .          |
|                     | VASTY2(29) | .          |
|                     | VASTY2(30) | 1,999      |
|                     | VASTY2(31) | .          |
|                     | VASTY2(32) | ,621       |
|                     | VASTY2(33) | ,520       |
|                     | VASTY2(34) | 3,070      |
|                     | VASTY2(35) | .          |
|                     | weekday    |            |
|                     | weekday(1) | 1,387      |
|                     | weekday(2) | 1,272      |

Peer review only

Variables in the Equation

|            | B      | S.E. | Wald    | df | Sig. | Exp(B) | 95% C.I. |
|------------|--------|------|---------|----|------|--------|----------|
|            |        |      |         |    |      |        | Lower    |
| weekday(3) | ,041   | ,153 | ,071    | 1  | ,790 | 1,041  | ,772     |
| weekday(4) | ,022   | ,154 | ,020    | 1  | ,886 | 1,022  | ,756     |
| weekday(5) | -,061  | ,158 | ,151    | 1  | ,697 | ,940   | ,690     |
| weekday(6) | -,192  | ,162 | 1,411   | 1  | ,235 | ,825   | ,601     |
| holiday(1) | -,240  | ,256 | ,880    | 1  | ,348 | ,787   | ,476     |
| season     |        |      | 7,122   | 4  | ,130 |        |          |
| season(1)  | ,034   | ,129 | ,072    | 1  | ,789 | 1,035  | ,805     |
| season(2)  | ,076   | ,118 | ,412    | 1  | ,521 | 1,079  | ,856     |
| season(3)  | -,070  | ,132 | ,284    | 1  | ,594 | ,932   | ,719     |
| season(4)  | -,286  | ,142 | 4,034   | 1  | ,045 | ,751   | ,568     |
| Constant   | -3,181 | ,308 | 106,553 | 1  | ,000 | ,042   |          |

Variables in the Equation

|            | 95% C.I. |
|------------|----------|
|            | Upper    |
| weekday(3) | 1,405    |
| weekday(4) | 1,383    |
| weekday(5) | 1,282    |
| weekday(6) | 1,133    |
| holiday(1) | 1,299    |
| season     |          |
| season(1)  | 1,332    |
| season(2)  | 1,360    |
| season(3)  | 1,208    |
| season(4)  | ,993     |
| Constant   |          |

a. Variable(s) entered on step 1: bv2, VASTY2, weekday, holiday, season.

LOGISTIC REGRESSION VARIABLES dod01

/METHOD=ENTER bv3 VASTY2 weekday holiday season

/CONTRAST (bv3)=Indicator(1)

/CONTRAST (VASTY2)=Indicator(1)

/CONTRAST (weekday)=Indicator(1)

/CONTRAST (holiday)=Indicator(1)

/CONTRAST (season)=Indicator(1)

/PRINT=CI(95)

/CRITERIA=PIN(0.05) POUT(0.10) ITERATE(20) CUT(0.5).

**Block 1: Method = Enter**

## Omnibus Tests of Model Coefficients

|        |       | Chi-square | df | Sig. |
|--------|-------|------------|----|------|
| Step 1 | Step  | 730,904    | 48 | ,000 |
|        | Block | 730,904    | 48 | ,000 |
|        | Model | 730,904    | 48 | ,000 |

## Model Summary

| Step | -2 Log likelihood    | Cox & Snell R Square | Nagelkerke R Square |
|------|----------------------|----------------------|---------------------|
| 1    | 4293,94 <sup>a</sup> | ,057                 | ,172                |

a. Estimation terminated at iteration number 20 because maximum iterations has been reached. Final solution cannot be found.

Classification Table<sup>a</sup>

| Observed           |                             | Predicted                   |                      |                    |       |
|--------------------|-----------------------------|-----------------------------|----------------------|--------------------|-------|
|                    |                             | dod01 dödsfall ja eller nej |                      | Percentage Correct |       |
|                    |                             | 0 inget dödsfall            | 1 minst ett dödsfall |                    |       |
| Step 1             | dod01 dödsfall ja eller nej | 0 inget dödsfall            | 11839                | 0                  | 100,0 |
|                    |                             | 1 minst ett dödsfall        | 636                  | 0                  | ,0    |
| Overall Percentage |                             |                             |                      |                    | 94,9  |

a. The cut value is ,500

## Variables in the Equation

|                     |            | B       | S.E.     | Wald    | df | Sig. | Exp(B) | 95% C.I. |
|---------------------|------------|---------|----------|---------|----|------|--------|----------|
|                     |            |         |          |         |    |      |        | Lower    |
| Step 1 <sup>a</sup> | bv3        |         |          | 14,871  | 2  | ,001 |        |          |
|                     | bv3(1)     | -,373   | ,200     | 3,457   | 1  | ,063 | ,689   | ,465     |
|                     | bv3(2)     | ,384    | ,118     | 10,660  | 1  | ,001 | 1,468  | 1,166    |
|                     | VASTY2     |         |          | 212,522 | 35 | ,000 |        |          |
|                     | VASTY2(1)  | ,640    | ,343     | 3,486   | 1  | ,062 | 1,897  | ,969     |
|                     | VASTY2(2)  | ,754    | ,335     | 5,073   | 1  | ,024 | 2,125  | 1,103    |
|                     | VASTY2(3)  | ,675    | ,335     | 4,062   | 1  | ,044 | 1,964  | 1,019    |
|                     | VASTY2(4)  | ,061    | ,371     | ,027    | 1  | ,869 | 1,063  | ,513     |
|                     | VASTY2(5)  | -,812   | ,495     | 2,692   | 1  | ,101 | ,444   | ,168     |
|                     | VASTY2(6)  | -18,098 | 2097,303 | ,000    | 1  | ,993 | ,000   | ,000     |
|                     | VASTY2(7)  | 1,471   | ,313     | 22,056  | 1  | ,000 | 4,355  | 2,357    |
|                     | VASTY2(8)  | ,791    | ,332     | 5,695   | 1  | ,017 | 2,207  | 1,152    |
|                     | VASTY2(9)  | ,326    | ,362     | ,815    | 1  | ,367 | 1,386  | ,682     |
|                     | VASTY2(10) | ,771    | ,333     | 5,358   | 1  | ,021 | 2,162  | 1,125    |
|                     | VASTY2(11) | ,349    | ,357     | ,956    | 1  | ,328 | 1,418  | ,704     |
|                     | VASTY2(12) | 1,275   | ,315     | 16,424  | 1  | ,000 | 3,579  | 1,932    |
|                     | VASTY2(13) | 1,454   | ,310     | 22,079  | 1  | ,000 | 4,282  | 2,334    |
|                     | VASTY2(14) | ,743    | ,334     | 4,962   | 1  | ,026 | 2,103  | 1,093    |
|                     | VASTY2(15) | ,163    | ,369     | ,196    | 1  | ,658 | 1,178  | ,571     |
|                     | VASTY2(16) | -,951   | ,645     | 2,172   | 1  | ,141 | ,386   | ,109     |
|                     | VASTY2(17) | -17,984 | 2095,842 | ,000    | 1  | ,993 | ,000   | ,000     |
|                     | VASTY2(18) | -2,702  | 1,038    | 6,775   | 1  | ,009 | ,067   | ,009     |
|                     | VASTY2(19) | -2,457  | 1,043    | 5,543   | 1  | ,019 | ,086   | ,011     |
|                     | VASTY2(20) | -1,478  | ,643     | 5,290   | 1  | ,021 | ,228   | ,065     |
|                     | VASTY2(21) | ,533    | ,345     | 2,381   | 1  | ,123 | 1,704  | ,866     |
|                     | VASTY2(22) | 1,173   | ,321     | 13,375  | 1  | ,000 | 3,232  | 1,724    |
|                     | VASTY2(23) | ,529    | ,348     | 2,310   | 1  | ,129 | 1,697  | ,858     |
|                     | VASTY2(24) | 1,327   | ,313     | 18,027  | 1  | ,000 | 3,770  | 2,043    |
|                     | VASTY2(25) | -,216   | ,435     | ,245    | 1  | ,620 | ,806   | ,343     |
|                     | VASTY2(26) | -18,044 | 2347,402 | ,000    | 1  | ,994 | ,000   | ,000     |
|                     | VASTY2(27) | -18,066 | 2092,884 | ,000    | 1  | ,993 | ,000   | ,000     |
|                     | VASTY2(28) | -18,009 | 2673,450 | ,000    | 1  | ,995 | ,000   | ,000     |
|                     | VASTY2(29) | -18,039 | 2096,957 | ,000    | 1  | ,993 | ,000   | ,000     |
|                     | VASTY2(30) | -,070   | ,386     | ,033    | 1  | ,856 | ,932   | ,437     |
|                     | VASTY2(31) | -18,021 | 2089,024 | ,000    | 1  | ,993 | ,000   | ,000     |
|                     | VASTY2(32) | -1,949  | ,762     | 6,552   | 1  | ,010 | ,142   | ,032     |
|                     | VASTY2(33) | -2,660  | 1,039    | 6,561   | 1  | ,010 | ,070   | ,009     |
|                     | VASTY2(34) | ,444    | ,351     | 1,603   | 1  | ,206 | 1,559  | ,784     |
|                     | VASTY2(35) | -18,146 | 2254,372 | ,000    | 1  | ,994 | ,000   | ,000     |
|                     | weekday    |         |          | 2,992   | 6  | ,810 |        |          |
|                     | weekday(1) | ,017    | ,152     | ,012    | 1  | ,914 | 1,017  | ,754     |
|                     | weekday(2) | -,085   | ,156     | ,294    | 1  | ,588 | ,919   | ,677     |



Variables in the Equation

|                     |            | 95% C.I... |
|---------------------|------------|------------|
|                     |            | Upper      |
| Step 1 <sup>a</sup> | bv3        |            |
|                     | bv3(1)     | 1,020      |
|                     | bv3(2)     | 1,849      |
|                     | VASTY2     |            |
|                     | VASTY2(1)  | 3,716      |
|                     | VASTY2(2)  | 4,094      |
|                     | VASTY2(3)  | 3,787      |
|                     | VASTY2(4)  | 2,202      |
|                     | VASTY2(5)  | 1,171      |
|                     | VASTY2(6)  | .          |
|                     | VASTY2(7)  | 8,048      |
|                     | VASTY2(8)  | 4,227      |
|                     | VASTY2(9)  | 2,816      |
|                     | VASTY2(10) | 4,152      |
|                     | VASTY2(11) | 2,856      |
|                     | VASTY2(12) | 6,632      |
|                     | VASTY2(13) | 7,854      |
|                     | VASTY2(14) | 4,043      |
|                     | VASTY2(15) | 2,428      |
|                     | VASTY2(16) | 1,369      |
|                     | VASTY2(17) | .          |
|                     | VASTY2(18) | ,513       |
|                     | VASTY2(19) | ,663       |
|                     | VASTY2(20) | ,804       |
|                     | VASTY2(21) | 3,352      |
|                     | VASTY2(22) | 6,061      |
|                     | VASTY2(23) | 3,357      |
|                     | VASTY2(24) | 6,956      |
|                     | VASTY2(25) | 1,892      |
|                     | VASTY2(26) | .          |
|                     | VASTY2(27) | .          |
|                     | VASTY2(28) | .          |
|                     | VASTY2(29) | .          |
|                     | VASTY2(30) | 1,987      |
|                     | VASTY2(31) | .          |
|                     | VASTY2(32) | ,633       |
|                     | VASTY2(33) | ,535       |
|                     | VASTY2(34) | 3,100      |
|                     | VASTY2(35) | .          |
|                     | weekday    |            |
|                     | weekday(1) | 1,371      |
|                     | weekday(2) | 1,248      |

Peer review only

Variables in the Equation

|            | B      | S.E. | Wald    | df | Sig. | Exp(B) | 95% C.I. |
|------------|--------|------|---------|----|------|--------|----------|
|            |        |      |         |    |      |        | Lower    |
| weekday(3) | ,027   | ,153 | ,031    | 1  | ,861 | 1,027  | ,761     |
| weekday(4) | ,012   | ,154 | ,006    | 1  | ,940 | 1,012  | ,748     |
| weekday(5) | -,077  | ,158 | ,240    | 1  | ,625 | ,926   | ,679     |
| weekday(6) | -,196  | ,162 | 1,476   | 1  | ,224 | ,822   | ,599     |
| holiday(1) | -,261  | ,256 | 1,042   | 1  | ,307 | ,770   | ,467     |
| season     |        |      | 7,191   | 4  | ,126 |        |          |
| season(1)  | ,034   | ,129 | ,070    | 1  | ,791 | 1,035  | ,804     |
| season(2)  | ,069   | ,118 | ,343    | 1  | ,558 | 1,072  | ,850     |
| season(3)  | -,076  | ,132 | ,332    | 1  | ,564 | ,927   | ,715     |
| season(4)  | -,292  | ,142 | 4,189   | 1  | ,041 | ,747   | ,565     |
| Constant   | -3,118 | ,300 | 108,255 | 1  | ,000 | ,044   |          |

Variables in the Equation

|            | 95% C.I. |
|------------|----------|
|            | Upper    |
| weekday(3) | 1,385    |
| weekday(4) | 1,368    |
| weekday(5) | 1,261    |
| weekday(6) | 1,128    |
| holiday(1) | 1,271    |
| season     |          |
| season(1)  | 1,331    |
| season(2)  | 1,351    |
| season(3)  | 1,201    |
| season(4)  | ,988     |
| Constant   |          |

a. Variable(s) entered on step 1: bv3, VASTY2, weekday, holiday, season.

LOGISTIC REGRESSION VARIABLES dod01

/METHOD=ENTER sv3 VASTY2 weekday holiday season

/CONTRAST (sv3)=Indicator(1)

/CONTRAST (VASTY2)=Indicator(1)

/CONTRAST (weekday)=Indicator(1)

/CONTRAST (holiday)=Indicator(1)

/CONTRAST (season)=Indicator(1)

/PRINT=CI(95)

/CRITERIA=PIN(0.05) POUT(0.10) ITERATE(20) CUT(0.5).

**Block 1: Method = Enter**

## Omnibus Tests of Model Coefficients

|        |       | Chi-square | df | Sig. |
|--------|-------|------------|----|------|
| Step 1 | Step  | 723,060    | 48 | ,000 |
|        | Block | 723,060    | 48 | ,000 |
|        | Model | 723,060    | 48 | ,000 |

## Model Summary

| Step | -2 Log likelihood    | Cox & Snell R Square | Nagelkerke R Square |
|------|----------------------|----------------------|---------------------|
| 1    | 4301,78 <sup>a</sup> | ,056                 | ,170                |

a. Estimation terminated at iteration number 20 because maximum iterations has been reached. Final solution cannot be found.

Classification Table<sup>a</sup>

| Observed           |                             | Predicted                   |                      |                    |       |
|--------------------|-----------------------------|-----------------------------|----------------------|--------------------|-------|
|                    |                             | dod01 dödsfall ja eller nej |                      | Percentage Correct |       |
|                    |                             | 0 inget dödsfall            | 1 minst ett dödsfall |                    |       |
| Step 1             | dod01 dödsfall ja eller nej | 0 inget dödsfall            | 11839                | 0                  | 100,0 |
|                    |                             | 1 minst ett dödsfall        | 636                  | 0                  | ,0    |
| Overall Percentage |                             |                             |                      |                    | 94,9  |

a. The cut value is ,500

## Variables in the Equation

|                     |            | B       | S.E.     | Wald    | df | Sig. | Exp(B) | 95% C.I. |
|---------------------|------------|---------|----------|---------|----|------|--------|----------|
|                     |            |         |          |         |    |      |        | Lower    |
| Step 1 <sup>a</sup> | sv3        |         |          | 6,934   | 2  | ,031 |        |          |
|                     | sv3(1)     | -,156   | ,117     | 1,769   | 1  | ,184 | ,856   | ,680     |
|                     | sv3(2)     | ,184    | ,111     | 2,731   | 1  | ,098 | 1,202  | ,966     |
|                     | VASTY2     |         |          | 219,392 | 35 | ,000 |        |          |
|                     | VASTY2(1)  | ,570    | ,344     | 2,754   | 1  | ,097 | 1,769  | ,902     |
|                     | VASTY2(2)  | ,653    | ,338     | 3,725   | 1  | ,054 | 1,921  | ,990     |
|                     | VASTY2(3)  | ,885    | ,332     | 7,124   | 1  | ,008 | 2,423  | 1,265    |
|                     | VASTY2(4)  | ,232    | ,369     | ,393    | 1  | ,531 | 1,261  | ,611     |
|                     | VASTY2(5)  | -,669   | ,496     | 1,823   | 1  | ,177 | ,512   | ,194     |
|                     | VASTY2(6)  | -18,130 | 2102,608 | ,000    | 1  | ,993 | ,000   | ,000     |
|                     | VASTY2(7)  | 1,740   | ,306     | 32,412  | 1  | ,000 | 5,700  | 3,131    |
|                     | VASTY2(8)  | ,913    | ,332     | 7,550   | 1  | ,006 | 2,492  | 1,299    |
|                     | VASTY2(9)  | ,397    | ,361     | 1,212   | 1  | ,271 | 1,488  | ,733     |
|                     | VASTY2(10) | ,665    | ,338     | 3,871   | 1  | ,049 | 1,945  | 1,003    |
|                     | VASTY2(11) | ,381    | ,357     | 1,140   | 1  | ,286 | 1,464  | ,727     |
|                     | VASTY2(12) | 1,191   | ,318     | 14,016  | 1  | ,000 | 3,292  | 1,764    |
|                     | VASTY2(13) | 1,403   | ,315     | 19,868  | 1  | ,000 | 4,068  | 2,195    |
|                     | VASTY2(14) | ,722    | ,335     | 4,639   | 1  | ,031 | 2,058  | 1,067    |
|                     | VASTY2(15) | ,076    | ,373     | ,042    | 1  | ,838 | 1,079  | ,520     |
|                     | VASTY2(16) | -,895   | ,644     | 1,928   | 1  | ,165 | ,409   | ,116     |
|                     | VASTY2(17) | -17,933 | 2097,697 | ,000    | 1  | ,993 | ,000   | ,000     |
|                     | VASTY2(18) | -2,506  | 1,041    | 5,796   | 1  | ,016 | ,082   | ,011     |
|                     | VASTY2(19) | -2,513  | 1,041    | 5,825   | 1  | ,016 | ,081   | ,011     |
|                     | VASTY2(20) | -1,453  | ,642     | 5,116   | 1  | ,024 | ,234   | ,066     |
|                     | VASTY2(21) | ,617    | ,346     | 3,191   | 1  | ,074 | 1,854  | ,942     |
|                     | VASTY2(22) | 1,126   | ,320     | 12,354  | 1  | ,000 | 3,082  | 1,645    |
|                     | VASTY2(23) | ,540    | ,348     | 2,406   | 1  | ,121 | 1,716  | ,867     |
|                     | VASTY2(24) | 1,407   | ,311     | 20,476  | 1  | ,000 | 4,085  | 2,221    |
|                     | VASTY2(25) | -,166   | ,436     | ,146    | 1  | ,703 | ,847   | ,360     |
|                     | VASTY2(26) | -18,008 | 2350,172 | ,000    | 1  | ,994 | ,000   | ,000     |
|                     | VASTY2(27) | -18,089 | 2096,319 | ,000    | 1  | ,993 | ,000   | ,000     |
|                     | VASTY2(28) | -18,119 | 2675,663 | ,000    | 1  | ,995 | ,000   | ,000     |
|                     | VASTY2(29) | -18,165 | 2098,433 | ,000    | 1  | ,993 | ,000   | ,000     |
|                     | VASTY2(30) | ,060    | ,387     | ,024    | 1  | ,877 | 1,062  | ,497     |
|                     | VASTY2(31) | -17,843 | 2098,197 | ,000    | 1  | ,993 | ,000   | ,000     |
|                     | VASTY2(32) | -1,813  | ,764     | 5,625   | 1  | ,018 | ,163   | ,036     |
|                     | VASTY2(33) | -2,519  | 1,041    | 5,854   | 1  | ,016 | ,081   | ,010     |
|                     | VASTY2(34) | ,474    | ,351     | 1,827   | 1  | ,176 | 1,606  | ,808     |
|                     | VASTY2(35) | -18,012 | 2257,675 | ,000    | 1  | ,994 | ,000   | ,000     |
|                     | weekday    |         |          | 3,391   | 6  | ,758 |        |          |
|                     | weekday(1) | ,021    | ,152     | ,020    | 1  | ,888 | 1,022  | ,758     |
|                     | weekday(2) | -,071   | ,156     | ,205    | 1  | ,651 | ,932   | ,686     |

Variables in the Equation

|                     |            | 95% C.I... |
|---------------------|------------|------------|
|                     |            | Upper      |
| Step 1 <sup>a</sup> | sv3        |            |
|                     | sv3(1)     | 1,077      |
|                     | sv3(2)     | 1,494      |
|                     | VASTY2     |            |
|                     | VASTY2(1)  | 3,470      |
|                     | VASTY2(2)  | 3,727      |
|                     | VASTY2(3)  | 4,642      |
|                     | VASTY2(4)  | 2,600      |
|                     | VASTY2(5)  | 1,353      |
|                     | VASTY2(6)  | .          |
|                     | VASTY2(7)  | 10,378     |
|                     | VASTY2(8)  | 4,780      |
|                     | VASTY2(9)  | 3,018      |
|                     | VASTY2(10) | 3,774      |
|                     | VASTY2(11) | 2,947      |
|                     | VASTY2(12) | 6,142      |
|                     | VASTY2(13) | 7,539      |
|                     | VASTY2(14) | 3,968      |
|                     | VASTY2(15) | 2,241      |
|                     | VASTY2(16) | 1,445      |
|                     | VASTY2(17) | .          |
|                     | VASTY2(18) | ,628       |
|                     | VASTY2(19) | ,624       |
|                     | VASTY2(20) | ,824       |
|                     | VASTY2(21) | 3,651      |
|                     | VASTY2(22) | 5,775      |
|                     | VASTY2(23) | 3,393      |
|                     | VASTY2(24) | 7,516      |
|                     | VASTY2(25) | 1,990      |
|                     | VASTY2(26) | .          |
|                     | VASTY2(27) | .          |
|                     | VASTY2(28) | .          |
|                     | VASTY2(29) | .          |
|                     | VASTY2(30) | 2,267      |
|                     | VASTY2(31) | .          |
|                     | VASTY2(32) | ,730       |
|                     | VASTY2(33) | ,620       |
|                     | VASTY2(34) | 3,194      |
|                     | VASTY2(35) | .          |
|                     | weekday    |            |
|                     | weekday(1) | 1,377      |
|                     | weekday(2) | 1,265      |

Peer review only

Variables in the Equation

|            | B      | S.E. | Wald    | df | Sig. | Exp(B) | 95% C.I. |
|------------|--------|------|---------|----|------|--------|----------|
|            |        |      |         |    |      |        | Lower    |
| weekday(3) | ,045   | ,153 | ,085    | 1  | ,770 | 1,046  | ,775     |
| weekday(4) | ,025   | ,154 | ,027    | 1  | ,870 | 1,026  | ,758     |
| weekday(5) | -,074  | ,158 | ,220    | 1  | ,639 | ,929   | ,681     |
| weekday(6) | -,202  | ,161 | 1,561   | 1  | ,212 | ,817   | ,596     |
| holiday(1) | -,258  | ,256 | 1,016   | 1  | ,313 | ,772   | ,468     |
| season     |        |      | 6,798   | 4  | ,147 |        |          |
| season(1)  | ,025   | ,129 | ,038    | 1  | ,846 | 1,025  | ,797     |
| season(2)  | ,045   | ,118 | ,142    | 1  | ,706 | 1,046  | ,830     |
| season(3)  | -,079  | ,132 | ,352    | 1  | ,553 | ,924   | ,713     |
| season(4)  | -,300  | ,142 | 4,435   | 1  | ,035 | ,741   | ,561     |
| Constant   | -3,144 | ,304 | 107,049 | 1  | ,000 | ,043   |          |

Variables in the Equation

|            | 95% C.I. |
|------------|----------|
|            | Upper    |
| weekday(3) | 1,410    |
| weekday(4) | 1,388    |
| weekday(5) | 1,266    |
| weekday(6) | 1,122    |
| holiday(1) | 1,276    |
| season     |          |
| season(1)  | 1,319    |
| season(2)  | 1,318    |
| season(3)  | 1,198    |
| season(4)  | ,979     |
| Constant   |          |

a. Variable(s) entered on step 1: sv3, VASTY2, weekday, holiday, season.

LOGISTIC REGRESSION VARIABLES dod01

/METHOD=ENTER sv5 VASTY2 weekday holiday season

/CONTRAST (sv5)=Indicator(1)

/CONTRAST (VASTY2)=Indicator(1)

/CONTRAST (weekday)=Indicator(1)

/CONTRAST (holiday)=Indicator(1)

/CONTRAST (season)=Indicator(1)

/PRINT=CI(95)

/CRITERIA=PIN(0.05) POUT(0.10) ITERATE(20) CUT(0.5).

**Block 1: Method = Enter**

## Omnibus Tests of Model Coefficients

|        |       | Chi-square | df | Sig. |
|--------|-------|------------|----|------|
| Step 1 | Step  | 723,161    | 50 | ,000 |
|        | Block | 723,161    | 50 | ,000 |
|        | Model | 723,161    | 50 | ,000 |

## Model Summary

| Step | -2 Log likelihood    | Cox & Snell R Square | Nagelkerke R Square |
|------|----------------------|----------------------|---------------------|
| 1    | 4301,68 <sup>a</sup> | ,056                 | ,170                |

a. Estimation terminated at iteration number 20 because maximum iterations has been reached. Final solution cannot be found.

Classification Table<sup>a</sup>

|                    |                             | Predicted                   |                      |                    |       |
|--------------------|-----------------------------|-----------------------------|----------------------|--------------------|-------|
|                    |                             | dod01 dödsfall ja eller nej |                      | Percentage Correct |       |
| Observed           |                             | 0 inget dödsfall            | 1 minst ett dödsfall |                    |       |
| Step 1             | dod01 dödsfall ja eller nej | 0 inget dödsfall            | 11839                | 0                  | 100,0 |
|                    |                             | 1 minst ett dödsfall        | 636                  | 0                  | ,0    |
| Overall Percentage |                             |                             |                      |                    | 94,9  |

a. The cut value is ,500

## Variables in the Equation

|                     |            | B       | S.E.     | Wald    | df | Sig. | Exp(B) | 95% C.I. |
|---------------------|------------|---------|----------|---------|----|------|--------|----------|
|                     |            |         |          |         |    |      |        | Lower    |
| Step 1 <sup>a</sup> | sv5        |         |          | 6,999   | 4  | ,136 |        |          |
|                     | sv5(1)     | -,191   | ,154     | 1,547   | 1  | ,214 | ,826   | ,611     |
|                     | sv5(2)     | -,064   | ,145     | ,193    | 1  | ,660 | ,938   | ,706     |
|                     | sv5(3)     | ,102    | ,130     | ,614    | 1  | ,433 | 1,107  | ,859     |
|                     | sv5(4)     | ,239    | ,147     | 2,620   | 1  | ,106 | 1,269  | ,951     |
|                     | VASTY2     |         |          | 214,674 | 35 | ,000 |        |          |
|                     | VASTY2(1)  | ,571    | ,344     | 2,759   | 1  | ,097 | 1,770  | ,902     |
|                     | VASTY2(2)  | ,629    | ,341     | 3,406   | 1  | ,065 | 1,876  | ,962     |
|                     | VASTY2(3)  | ,877    | ,332     | 6,990   | 1  | ,008 | 2,403  | 1,255    |
|                     | VASTY2(4)  | ,234    | ,369     | ,402    | 1  | ,526 | 1,264  | ,613     |
|                     | VASTY2(5)  | -,672   | ,496     | 1,835   | 1  | ,176 | ,511   | ,193     |
|                     | VASTY2(6)  | -18,173 | 2102,360 | ,000    | 1  | ,993 | ,000   | ,000     |
|                     | VASTY2(7)  | 1,734   | ,306     | 32,192  | 1  | ,000 | 5,664  | 3,112    |
|                     | VASTY2(8)  | ,909    | ,333     | 7,474   | 1  | ,006 | 2,483  | 1,294    |
|                     | VASTY2(9)  | ,396    | ,361     | 1,201   | 1  | ,273 | 1,485  | ,732     |
|                     | VASTY2(10) | ,637    | ,342     | 3,477   | 1  | ,062 | 1,891  | ,968     |
|                     | VASTY2(11) | ,375    | ,357     | 1,101   | 1  | ,294 | 1,454  | ,722     |
|                     | VASTY2(12) | 1,180   | ,319     | 13,652  | 1  | ,000 | 3,253  | 1,740    |
|                     | VASTY2(13) | 1,374   | ,319     | 18,547  | 1  | ,000 | 3,950  | 2,114    |
|                     | VASTY2(14) | ,708    | ,336     | 4,426   | 1  | ,035 | 2,029  | 1,050    |
|                     | VASTY2(15) | ,059    | ,375     | ,025    | 1  | ,874 | 1,061  | ,509     |
|                     | VASTY2(16) | -,907   | ,645     | 1,975   | 1  | ,160 | ,404   | ,114     |
|                     | VASTY2(17) | -17,933 | 2097,524 | ,000    | 1  | ,993 | ,000   | ,000     |
|                     | VASTY2(18) | -2,476  | 1,044    | 5,627   | 1  | ,018 | ,084   | ,011     |
|                     | VASTY2(19) | -2,480  | 1,044    | 5,640   | 1  | ,018 | ,084   | ,011     |
|                     | VASTY2(20) | -1,475  | ,644     | 5,253   | 1  | ,022 | ,229   | ,065     |
|                     | VASTY2(21) | ,612    | ,346     | 3,130   | 1  | ,077 | 1,844  | ,936     |
|                     | VASTY2(22) | 1,123   | ,320     | 12,297  | 1  | ,000 | 3,075  | 1,641    |
|                     | VASTY2(23) | ,540    | ,348     | 2,405   | 1  | ,121 | 1,716  | ,867     |
|                     | VASTY2(24) | 1,396   | ,312     | 20,084  | 1  | ,000 | 4,039  | 2,194    |
|                     | VASTY2(25) | -,166   | ,436     | ,145    | 1  | ,703 | ,847   | ,360     |
|                     | VASTY2(26) | -18,008 | 2350,383 | ,000    | 1  | ,994 | ,000   | ,000     |
|                     | VASTY2(27) | -18,106 | 2095,745 | ,000    | 1  | ,993 | ,000   | ,000     |
|                     | VASTY2(28) | -18,169 | 2675,548 | ,000    | 1  | ,995 | ,000   | ,000     |
|                     | VASTY2(29) | -18,220 | 2098,403 | ,000    | 1  | ,993 | ,000   | ,000     |
|                     | VASTY2(30) | ,061    | ,387     | ,025    | 1  | ,876 | 1,063  | ,497     |
|                     | VASTY2(31) | -17,824 | 2097,875 | ,000    | 1  | ,993 | ,000   | ,000     |
|                     | VASTY2(32) | -1,784  | ,768     | 5,395   | 1  | ,020 | ,168   | ,037     |
|                     | VASTY2(33) | -2,486  | 1,044    | 5,667   | 1  | ,017 | ,083   | ,011     |
|                     | VASTY2(34) | ,470    | ,351     | 1,794   | 1  | ,180 | 1,600  | ,804     |
|                     | VASTY2(35) | -18,001 | 2257,506 | ,000    | 1  | ,994 | ,000   | ,000     |
|                     | weekday    |         |          | 3,314   | 6  | ,769 |        |          |



Variables in the Equation

|                     |            | 95% C.I... |
|---------------------|------------|------------|
|                     |            | Upper      |
| Step 1 <sup>a</sup> | sv5        |            |
|                     | sv5(1)     | 1,116      |
|                     | sv5(2)     | 1,247      |
|                     | sv5(3)     | 1,427      |
|                     | sv5(4)     | 1,694      |
|                     | VASTY2     |            |
|                     | VASTY2(1)  | 3,474      |
|                     | VASTY2(2)  | 3,658      |
|                     | VASTY2(3)  | 4,601      |
|                     | VASTY2(4)  | 2,606      |
|                     | VASTY2(5)  | 1,350      |
|                     | VASTY2(6)  | .          |
|                     | VASTY2(7)  | 10,311     |
|                     | VASTY2(8)  | 4,766      |
|                     | VASTY2(9)  | 3,013      |
|                     | VASTY2(10) | 3,695      |
|                     | VASTY2(11) | 2,928      |
|                     | VASTY2(12) | 6,082      |
|                     | VASTY2(13) | 7,380      |
|                     | VASTY2(14) | 3,923      |
|                     | VASTY2(15) | 2,212      |
|                     | VASTY2(16) | 1,430      |
|                     | VASTY2(17) | .          |
|                     | VASTY2(18) | ,650       |
|                     | VASTY2(19) | ,648       |
|                     | VASTY2(20) | ,808       |
|                     | VASTY2(21) | 3,631      |
|                     | VASTY2(22) | 5,761      |
|                     | VASTY2(23) | 3,395      |
|                     | VASTY2(24) | 7,439      |
|                     | VASTY2(25) | 1,992      |
|                     | VASTY2(26) | .          |
|                     | VASTY2(27) | .          |
|                     | VASTY2(28) | .          |
|                     | VASTY2(29) | .          |
|                     | VASTY2(30) | 2,270      |
|                     | VASTY2(31) | .          |
|                     | VASTY2(32) | ,757       |
|                     | VASTY2(33) | ,645       |
|                     | VASTY2(34) | 3,180      |
|                     | VASTY2(35) | .          |
|                     | weekday    |            |

Peer review only

Variables in the Equation

|            | B      | S.E. | Wald    | df | Sig. | Exp(B) | 95% C.I. |
|------------|--------|------|---------|----|------|--------|----------|
|            |        |      |         |    |      |        | Lower    |
| weekday(1) | ,025   | ,152 | ,026    | 1  | ,871 | 1,025  | ,760     |
| weekday(2) | -,070  | ,156 | ,201    | 1  | ,654 | ,932   | ,687     |
| weekday(3) | ,043   | ,153 | ,079    | 1  | ,779 | 1,044  | ,774     |
| weekday(4) | ,028   | ,155 | ,033    | 1  | ,856 | 1,028  | ,760     |
| weekday(5) | -,065  | ,158 | ,171    | 1  | ,680 | ,937   | ,687     |
| weekday(6) | -,200  | ,162 | 1,526   | 1  | ,217 | ,819   | ,597     |
| holiday(1) | -,254  | ,256 | ,981    | 1  | ,322 | ,776   | ,470     |
| season     |        |      | 6,843   | 4  | ,144 |        |          |
| season(1)  | ,028   | ,129 | ,049    | 1  | ,825 | 1,029  | ,800     |
| season(2)  | ,053   | ,119 | ,203    | 1  | ,653 | 1,055  | ,836     |
| season(3)  | -,080  | ,133 | ,362    | 1  | ,547 | ,923   | ,712     |
| season(4)  | -,294  | ,142 | 4,264   | 1  | ,039 | ,745   | ,564     |
| Constant   | -3,148 | ,311 | 102,700 | 1  | ,000 | ,043   |          |

Variables in the Equation

|            | 95% C.I. |
|------------|----------|
|            | Upper    |
| weekday(1) | 1,382    |
| weekday(2) | 1,266    |
| weekday(3) | 1,408    |
| weekday(4) | 1,392    |
| weekday(5) | 1,277    |
| weekday(6) | 1,124    |
| holiday(1) | 1,282    |
| season     |          |
| season(1)  | 1,324    |
| season(2)  | 1,331    |
| season(3)  | 1,197    |
| season(4)  | ,985     |
| Constant   |          |

a. Variable(s) entered on step 1: sv5, VASTY2, weekday, holiday, season.

LOGISTIC REGRESSION VARIABLES dod01

/METHOD=ENTER sv7 VASTY2 weekday holiday season

/CONTRAST (sv7)=Indicator(1)

/CONTRAST (VASTY2)=Indicator(1)

/CONTRAST (weekday)=Indicator(1)

/CONTRAST (holiday)=Indicator(1)

/CONTRAST (season)=Indicator(1)

/PRINT=CI(95)  
 /CRITERIA=PIN(0.05) POUT(0.10) ITERATE(20) CUT(0.5).

**Block 1: Method = Enter**

**Omnibus Tests of Model Coefficients**

|        |       | Chi-square | df | Sig. |
|--------|-------|------------|----|------|
| Step 1 | Step  | 730,384    | 52 | ,000 |
|        | Block | 730,384    | 52 | ,000 |
|        | Model | 730,384    | 52 | ,000 |

**Model Summary**

| Step | -2 Log likelihood    | Cox & Snell R Square | Nagelkerke R Square |
|------|----------------------|----------------------|---------------------|
| 1    | 4294,46 <sup>a</sup> | ,057                 | ,172                |

a. Estimation terminated at iteration number 20 because maximum iterations has been reached. Final solution cannot be found.

**Classification Table<sup>a</sup>**

|                    |                             | Predicted                   |                      |                    |
|--------------------|-----------------------------|-----------------------------|----------------------|--------------------|
|                    |                             | dod01 dödsfall ja eller nej |                      | Percentage Correct |
| Observed           |                             | 0 inget dödsfall            | 1 minst ett dödsfall |                    |
| Step 1             | dod01 dödsfall ja eller nej | 11839                       | 0                    | 100,0              |
|                    |                             | 636                         | 0                    | ,0                 |
| Overall Percentage |                             |                             |                      | 94,9               |

a. The cut value is ,500

## Variables in the Equation

|                     |            | B       | S.E.     | Wald    | df | Sig. | Exp(B) | 95% C.I. |
|---------------------|------------|---------|----------|---------|----|------|--------|----------|
|                     |            |         |          |         |    |      |        | Lower    |
| Step 1 <sup>a</sup> | sv7        |         |          | 13,534  | 6  | ,035 |        |          |
|                     | sv7(1)     | -,349   | ,191     | 3,334   | 1  | ,068 | ,705   | ,485     |
|                     | sv7(2)     | ,163    | ,169     | ,928    | 1  | ,335 | 1,177  | ,845     |
|                     | sv7(3)     | -,006   | ,169     | ,001    | 1  | ,972 | ,994   | ,713     |
|                     | sv7(4)     | ,145    | ,155     | ,868    | 1  | ,352 | 1,156  | ,852     |
|                     | sv7(5)     | ,234    | ,152     | 2,376   | 1  | ,123 | 1,263  | ,938     |
|                     | sv7(6)     | ,349    | ,177     | 3,869   | 1  | ,049 | 1,417  | 1,001    |
|                     | VASTY2     |         |          | 207,524 | 35 | ,000 |        |          |
|                     | VASTY2(1)  | ,570    | ,344     | 2,744   | 1  | ,098 | 1,769  | ,901     |
|                     | VASTY2(2)  | ,614    | ,342     | 3,227   | 1  | ,072 | 1,847  | ,946     |
|                     | VASTY2(3)  | ,867    | ,332     | 6,820   | 1  | ,009 | 2,379  | 1,241    |
|                     | VASTY2(4)  | ,221    | ,370     | ,358    | 1  | ,550 | 1,247  | ,604     |
|                     | VASTY2(5)  | -,652   | ,496     | 1,730   | 1  | ,188 | ,521   | ,197     |
|                     | VASTY2(6)  | -18,215 | 2101,929 | ,000    | 1  | ,993 | ,000   | ,000     |
|                     | VASTY2(7)  | 1,745   | ,306     | 32,575  | 1  | ,000 | 5,727  | 3,145    |
|                     | VASTY2(8)  | ,896    | ,333     | 7,243   | 1  | ,007 | 2,450  | 1,276    |
|                     | VASTY2(9)  | ,400    | ,361     | 1,225   | 1  | ,268 | 1,491  | ,735     |
|                     | VASTY2(10) | ,617    | ,343     | 3,243   | 1  | ,072 | 1,853  | ,947     |
|                     | VASTY2(11) | ,399    | ,357     | 1,248   | 1  | ,264 | 1,491  | ,740     |
|                     | VASTY2(12) | 1,170   | ,319     | 13,436  | 1  | ,000 | 3,222  | 1,723    |
|                     | VASTY2(13) | 1,352   | ,320     | 17,837  | 1  | ,000 | 3,865  | 2,064    |
|                     | VASTY2(14) | ,701    | ,337     | 4,327   | 1  | ,038 | 2,015  | 1,041    |
|                     | VASTY2(15) | ,039    | ,376     | ,011    | 1  | ,918 | 1,039  | ,497     |
|                     | VASTY2(16) | -,908   | ,646     | 1,977   | 1  | ,160 | ,403   | ,114     |
|                     | VASTY2(17) | -17,931 | 2092,993 | ,000    | 1  | ,993 | ,000   | ,000     |
|                     | VASTY2(18) | -2,287  | 1,047    | 4,773   | 1  | ,029 | ,102   | ,013     |
|                     | VASTY2(19) | -2,262  | 1,049    | 4,654   | 1  | ,031 | ,104   | ,013     |
|                     | VASTY2(20) | -1,483  | ,644     | 5,296   | 1  | ,021 | ,227   | ,064     |
|                     | VASTY2(21) | ,615    | ,346     | 3,163   | 1  | ,075 | 1,850  | ,939     |
|                     | VASTY2(22) | 1,118   | ,320     | 12,169  | 1  | ,000 | 3,058  | 1,632    |
|                     | VASTY2(23) | ,554    | ,348     | 2,533   | 1  | ,112 | 1,741  | ,880     |
|                     | VASTY2(24) | 1,386   | ,312     | 19,781  | 1  | ,000 | 4,000  | 2,172    |
|                     | VASTY2(25) | -,156   | ,437     | ,128    | 1  | ,720 | ,855   | ,364     |
|                     | VASTY2(26) | -18,002 | 2347,147 | ,000    | 1  | ,994 | ,000   | ,000     |
|                     | VASTY2(27) | -18,128 | 2094,181 | ,000    | 1  | ,993 | ,000   | ,000     |
|                     | VASTY2(28) | -18,210 | 2675,280 | ,000    | 1  | ,995 | ,000   | ,000     |
|                     | VASTY2(29) | -18,268 | 2098,326 | ,000    | 1  | ,993 | ,000   | ,000     |
|                     | VASTY2(30) | ,053    | ,387     | ,018    | 1  | ,892 | 1,054  | ,493     |
|                     | VASTY2(31) | -17,716 | 2092,065 | ,000    | 1  | ,993 | ,000   | ,000     |
|                     | VASTY2(32) | -1,597  | ,772     | 4,278   | 1  | ,039 | ,203   | ,045     |
|                     | VASTY2(33) | -2,268  | 1,049    | 4,677   | 1  | ,031 | ,103   | ,013     |
|                     | VASTY2(34) | ,465    | ,351     | 1,755   | 1  | ,185 | 1,592  | ,800     |

## Variables in the Equation

|                     |            | 95% C.I... |
|---------------------|------------|------------|
|                     |            | Upper      |
| Step 1 <sup>a</sup> | sv7        |            |
|                     | sv7(1)     | 1,026      |
|                     | sv7(2)     | 1,639      |
|                     | sv7(3)     | 1,385      |
|                     | sv7(4)     | 1,567      |
|                     | sv7(5)     | 1,701      |
|                     | sv7(6)     | 2,005      |
|                     | VASTY2     |            |
|                     | VASTY2(1)  | 3,473      |
|                     | VASTY2(2)  | 3,608      |
|                     | VASTY2(3)  | 4,559      |
|                     | VASTY2(4)  | 2,574      |
|                     | VASTY2(5)  | 1,377      |
|                     | VASTY2(6)  | .          |
|                     | VASTY2(7)  | 10,429     |
|                     | VASTY2(8)  | 4,705      |
|                     | VASTY2(9)  | 3,027      |
|                     | VASTY2(10) | 3,627      |
|                     | VASTY2(11) | 3,004      |
|                     | VASTY2(12) | 6,022      |
|                     | VASTY2(13) | 7,238      |
|                     | VASTY2(14) | 3,898      |
|                     | VASTY2(15) | 2,172      |
|                     | VASTY2(16) | 1,430      |
|                     | VASTY2(17) | .          |
|                     | VASTY2(18) | ,790       |
|                     | VASTY2(19) | ,813       |
|                     | VASTY2(20) | ,803       |
|                     | VASTY2(21) | 3,643      |
|                     | VASTY2(22) | 5,730      |
|                     | VASTY2(23) | 3,445      |
|                     | VASTY2(24) | 7,370      |
|                     | VASTY2(25) | 2,012      |
|                     | VASTY2(26) | .          |
|                     | VASTY2(27) | .          |
|                     | VASTY2(28) | .          |
|                     | VASTY2(29) | .          |
|                     | VASTY2(30) | 2,252      |
|                     | VASTY2(31) | .          |
|                     | VASTY2(32) | ,920       |
|                     | VASTY2(33) | ,808       |
|                     | VASTY2(34) | 3,166      |

Variables in the Equation

|            | B       | S.E.     | Wald    | df | Sig. | Exp(B) | 95% C.I. |
|------------|---------|----------|---------|----|------|--------|----------|
|            |         |          |         |    |      |        | Lower    |
| VASTY2(35) | -17,980 | 2252,756 | ,000    | 1  | ,994 | ,000   | ,000     |
| weekday    |         |          | 3,267   | 6  | ,775 |        |          |
| weekday(1) | ,024    | ,152     | ,025    | 1  | ,874 | 1,025  | ,760     |
| weekday(2) | -,069   | ,156     | ,194    | 1  | ,659 | ,933   | ,687     |
| weekday(3) | ,046    | ,153     | ,091    | 1  | ,763 | 1,047  | ,776     |
| weekday(4) | ,025    | ,155     | ,026    | 1  | ,873 | 1,025  | ,757     |
| weekday(5) | -,061   | ,158     | ,146    | 1  | ,702 | ,941   | ,690     |
| weekday(6) | -,199   | ,162     | 1,515   | 1  | ,218 | ,820   | ,597     |
| holiday(1) | -,243   | ,256     | ,898    | 1  | ,343 | ,784   | ,475     |
| season     |         |          | 7,242   | 4  | ,124 |        |          |
| season(1)  | ,032    | ,129     | ,062    | 1  | ,803 | 1,033  | ,802     |
| season(2)  | ,068    | ,119     | ,329    | 1  | ,566 | 1,071  | ,848     |
| season(3)  | -,084   | ,133     | ,406    | 1  | ,524 | ,919   | ,709     |
| season(4)  | -,292   | ,142     | 4,206   | 1  | ,040 | ,747   | ,565     |
| Constant   | -3,212  | ,317     | 102,895 | 1  | ,000 | ,040   |          |

Variables in the Equation

|            | 95% C.I. |
|------------|----------|
|            | Upper    |
| VASTY2(35) | .        |
| weekday    |          |
| weekday(1) | 1,381    |
| weekday(2) | 1,268    |
| weekday(3) | 1,413    |
| weekday(4) | 1,388    |
| weekday(5) | 1,284    |
| weekday(6) | 1,125    |
| holiday(1) | 1,296    |
| season     |          |
| season(1)  | 1,329    |
| season(2)  | 1,351    |
| season(3)  | 1,192    |
| season(4)  | ,987     |
| Constant   |          |

a. Variable(s) entered on step 1: sv7, VASTY2, weekday, holiday, season.

STROBE Statement—checklist of items that should be included in reports of observational studies

|                              | Item No | Recommendation                                                                                                                                                                                                                |
|------------------------------|---------|-------------------------------------------------------------------------------------------------------------------------------------------------------------------------------------------------------------------------------|
| <b>Title and abstract</b>    | 1       | (a) Indicate the study's design with a commonly used term in the title or the abstract<br>(b) Provide in the abstract an informative and balanced summary of what was done and what was found<br><a href="#">Page 2 and 3</a> |
| <b>Introduction</b>          |         |                                                                                                                                                                                                                               |
| Background/rationale         | 2       | Explain the scientific background and rationale for the investigation etc. <a href="#">Page 3-4</a>                                                                                                                           |
| Objectives                   | 3       | State specific objectives, including any prespecified hypotheses. <a href="#">Page 4</a>                                                                                                                                      |
| <b>Methods</b>               |         |                                                                                                                                                                                                                               |
| Study design                 | 4       | Present key elements of study design early in the paper, <a href="#">page 4</a>                                                                                                                                               |
| Setting                      | 5       | Describe the setting, locations, and relevant dates, including periods of recruitment, exposure, follow-up, and data collection, <a href="#">page 4-5</a>                                                                     |
| Participants                 | 6       | <a href="#">Page 5</a>                                                                                                                                                                                                        |
| Variables                    | 7       | Clearly define all outcomes, exposures, predictors, potential confounders, and effect modifiers. Give diagnostic criteria, if applicable, <a href="#">page 6</a>                                                              |
| Data sources/<br>measurement | 8*      | For each variable of interest, give sources of data and details of methods of assessment (measurement). Describe comparability of assessment methods if there is more than one group, <a href="#">page 6-7</a>                |
| Bias                         | 9       | Describe any efforts to address potential sources of bias, <a href="#">page 6-7</a>                                                                                                                                           |
| Study size                   | 10      | Explain how the study size was arrived at, <a href="#">page 6-7</a>                                                                                                                                                           |
| Quantitative variables       | 11      | Explain how quantitative variables were handled in the analyses. If applicable, describe which groupings were chosen and why, <a href="#">page 6-7</a>                                                                        |
| Statistical methods          | 12      | <a href="#">Page 6-7</a>                                                                                                                                                                                                      |

Continued on next page

| <b>Results</b>           |     |                                                                                                                                                                                                                                                                                                                                                                                                                            |
|--------------------------|-----|----------------------------------------------------------------------------------------------------------------------------------------------------------------------------------------------------------------------------------------------------------------------------------------------------------------------------------------------------------------------------------------------------------------------------|
| Participants             | 13* | (a) Report numbers of individuals at each stage of study—eg numbers potentially eligible, examined for eligibility, confirmed eligible, included in the study, completing follow-up, and analysed<br>(b) Give reasons for non-participation at each stage<br>(c) Consider use of a flow diagram                                                                                                                            |
| Descriptive data         | 14* | (a) Give characteristics of study participants (eg demographic, clinical, social) and information on exposures and potential confounders<br>(b) Indicate number of participants with missing data for each variable of interest <b>p 7-9 table 1</b><br>(c) <i>Cohort study</i> —Summarise follow-up time (eg, average and total amount)                                                                                   |
| Outcome data             | 15* | <i>Cohort study</i> —Report numbers of outcome events or summary measures over time<br><i>Case-control study</i> —Report numbers in each exposure category, or summary measures of exposure<br><i>Cross-sectional study</i> —Report numbers of outcome events or summary measures <b>p 7-9, table 1-2</b>                                                                                                                  |
| Main results             | 16  | (a) Give unadjusted estimates and, if applicable, confounder-adjusted estimates and their precision (eg, 95% confidence interval). Make clear which confounders were adjusted for and why they were included <b>p 7-9</b><br>(b) Report category boundaries when continuous variables were categorized<br>(c) If relevant, consider translating estimates of relative risk into absolute risk for a meaningful time period |
| Other analyses           | 17  | Report other analyses done—eg analyses of subgroups and interactions, and sensitivity analyses                                                                                                                                                                                                                                                                                                                             |
| <b>Discussion</b>        |     |                                                                                                                                                                                                                                                                                                                                                                                                                            |
| Key results              | 18  | Summarise key results with reference to study objectives <b>p 9-10</b>                                                                                                                                                                                                                                                                                                                                                     |
| Limitations              | 19  | Discuss limitations of the study, taking into account sources of potential bias or imprecision. Discuss both direction and magnitude of any potential bias, <b>p 11</b>                                                                                                                                                                                                                                                    |
| Interpretation           | 20  | Give a cautious overall interpretation of results considering objectives, limitations, multiplicity of analyses, results from similar studies, and other relevant evidence <b>p11-12</b>                                                                                                                                                                                                                                   |
| Generalisability         | 21  | Discuss the generalisability (external validity) of the study results <b>p11-12</b>                                                                                                                                                                                                                                                                                                                                        |
| <b>Other information</b> |     |                                                                                                                                                                                                                                                                                                                                                                                                                            |
| Funding                  | 22  | Give the source of funding and the role of the funders for the present study and, if applicable, for the original study on which the present article is based <b>p 12</b>                                                                                                                                                                                                                                                  |

\*Give information separately for cases and controls in case-control studies and, if applicable, for exposed and unexposed groups in cohort and cross-sectional studies.

**Note:** An Explanation and Elaboration article discusses each checklist item and gives methodological background and published examples of transparent reporting. The STROBE checklist is best used in conjunction with this article (freely available on the Web sites of PLoS Medicine at <http://www.plosmedicine.org/>, Annals of Internal Medicine at <http://www.annals.org/>, and Epidemiology at <http://www.epidem.com/>). Information on the STROBE Initiative is available at [www.strobe-statement.org](http://www.strobe-statement.org).



# BMJ Open

## NURSING WORKLOAD, PATIENT SAFETY INCIDENTS AND MORTALITY – AN OBSERVATIONAL STUDY FROM FINLAND

|                                 |                                                                                                                                                                                                                                           |
|---------------------------------|-------------------------------------------------------------------------------------------------------------------------------------------------------------------------------------------------------------------------------------------|
| Journal:                        | <i>BMJ Open</i>                                                                                                                                                                                                                           |
| Manuscript ID                   | bmjopen-2017-016367.R4                                                                                                                                                                                                                    |
| Article Type:                   | Research                                                                                                                                                                                                                                  |
| Date Submitted by the Author:   | 31-Jan-2018                                                                                                                                                                                                                               |
| Complete List of Authors:       | Fagerström, Lisbeth; Åbo Akademi University, Faculty of Education and Welfare; University College of Southeast Norway, Kinnunen, Marina; Vaasa Central Hospital<br>Saarela, Jan; Åbo Akademi University, Faculty of Education and Welfare |
| <b>Primary Subject Heading</b>: | Nursing                                                                                                                                                                                                                                   |
| Secondary Subject Heading:      | Health services research                                                                                                                                                                                                                  |
| Keywords:                       | Health & safety < HEALTH SERVICES ADMINISTRATION & MANAGEMENT, Human resource management < HEALTH SERVICES ADMINISTRATION & MANAGEMENT, Risk management < HEALTH SERVICES ADMINISTRATION & MANAGEMENT                                     |
|                                 |                                                                                                                                                                                                                                           |

SCHOLARONE™  
Manuscripts

1  
2  
3 **NURSING WORKLOAD, PATIENT SAFETY INCIDENTS AND MORTALITY – AN**  
4 **OBSERVATIONAL STUDY FROM FINLAND**  
5

6  
7  
8 **Authors:**

9 Professor Lisbeth Fagerström, PhD,

10 Åbo Akademi University, Faculty of Education and Welfare Studies, Vaasa, Finland;

11 University College of Southeast Norway, Faculty of Health and Social Sciences, Drammen,  
12 Norway  
13

14  
15  
16  
17  
18 Chief Director of Nursing Marina Kinnunen, PhD

19 Vaasa Central Hospital, Vaasa, Finland  
20

21  
22  
23 Professor Jan Saarela, PhD,

24 Åbo Akademi University, Faculty of Education and Welfare Studies, Vaasa, Finland;

25 University of Helsinki, Swedish School of Social Science, Helsinki, Finland  
26  
27  
28  
29

30 **Corresponding Author:**

31 Professor Lisbeth Fagerström, Faculty of Education and Welfare Studies, Åbo Akademi

32 University, Strandgatan 2, 65101 Vaasa, Finland. Mobile: +358414331097; +4745503873,

33 phone number: +358 2 21531, email: [lisbeth.fagerstrom@abo.fi](mailto:lisbeth.fagerstrom@abo.fi); [lisbeth.fagerstrom@usn.no](mailto:lisbeth.fagerstrom@usn.no)

34  
35 [Key words: nurse staffing, outcomes, patient safety, mortality, human resources](#)

36  
37 [Word count: 3 945 words.](#)  
38  
39  
40  
41  
42  
43  
44  
45  
46  
47  
48  
49  
50  
51  
52  
53  
54  
55  
56  
57  
58  
59  
60

## Abstract

**Objective** To investigate whether the daily workload per nurse (OPC/nurse) as measured by the RAFAELA system correlates with different types of patient safety incidents and with patient mortality, and to compare the results with regressions based on the standard patients/nurse measure.

**Setting** We obtained data from 36 units from four Finnish hospitals. One was a tertiary acute care hospital, and the three others were secondary acute care hospitals.

**Participants** Patients' nursing intensity (249,123 classifications), nursing resources, patient safety incidents and patient mortality were collected on a daily basis during one year, corresponding to 12,475 data points. Associations between OPC/nurse and patient safety incidents or mortality were estimated using unadjusted logistic regression models, and models that adjusted for ward-specific effects, and effects of day of the week, holiday and season.

**Primary and secondary outcome measures** Main outcome measures were patient safety incidents and death of a patient.

**Results** When OPC/nurse was above the assumed optimal level, the adjusted odds for a patient safety incident were 1.24 (95% CI: 1.08-1.42) that of the assumed optimal level, and 0.79 (95% CI: 0.67-0.93) if it was below the assumed optimal level. Corresponding estimates for patient mortality were 1.43 (95% CI: 1.18-1.73) and 0.78 (95% CI: 0.60-1.00), respectively. As compared with the patients/nurse classification, models estimated on basis of the RAFAELA classification system generally provided larger effect sizes, greater statistical power, and better model fit, although the difference was not very large. Net benefits as calculated on basis of decision analysis did not provide any clear evidence on which measure to prefer.

**Conclusions** We have demonstrated an association between daily workload per nurse and patient safety incidents and mortality. Current findings need to be replicated by future studies.

### Strengths and limitations of this study

- The study is the first to assess the relationship between nursing workload and patient outcomes based on data obtained on a daily basis
- The instrument used here takes patient characteristics, such as age, sex and diagnoses, into account

- The study provides some evidence to suggest that the traditional nurse staffing measure, the patients-to-nurse ratio, may partly fail to control for patient severity and case mix
- The study does not address the potential influence of skill-mix, competence level, work experience, or the professionals' patient-related direct time

## Introduction

Many studies have shown that insufficient nurse staffing in hospital-based care negatively affects outcomes such as mortality, infections, and failure to rescue (1-6). However, the results are inconsistent and indicate a complex and non-linear relationship between nursing workload (NWL), mortality, and other patient outcomes (7-12). The strength of the evidence underpinning the association between nurse staffing and outcomes in previous studies can be challenged. Poor research designs, measurement problems, and/or imprecise data that do not take into account daily variations in patients' care needs, may contribute to the mixed findings (8). Higher nurse staffing and richer skill mix are associated with improved patient outcomes (4,8,10). Therefore, higher ratios have been recommended for improving patient safety and outcomes (1,9). However, it is difficult to set fixed, standard patient-to-nurse ratios for units in acute care hospitals, as evidenced in systematic reviews and other studies (7,10,13-15). Staffing levels must instead match patients' nursing care needs (8,16-17).

In an attempt to accommodate some of these issues, the RAFAELA patient classification system was developed in the 1990s in Finland (16, 18-19). As compared to most other patient classification systems that use fixed patient-to-nurse ratios, the RAFAELA system use daily data on patients' care needs and the workload per nurse. The main purpose of the RAFAELA system is to ensure an appropriate allocation of nurse staff resources and, thus, a preferable nursing workload, which has been labelled as an optimal nursing workload (NWL). The latter term refers to a situation when patients' care needs are assumed to be in balance with the nursing resources, and that working conditions can be assumed as being favorable, most desirable, or satisfactory for the realization of good nursing care (16, 18-22). While certain realities such as economic restraints cannot be disregarded, the intention with the RAFAELA system is to provide a nursing workload measure dedicated to the reduction or elimination of adverse events.

1  
2  
3 In the RAFAELA system, NWL is based on daily assessments of patients' care needs and the  
4 registration of the nursing staff resources (16). The PAONCIL method ('Professional  
5 Assessment of Optimal Nursing Care Intensity Level') is used to establish an assumed  
6 optimal NWL for a specific ward. Daily measurements of NWL (OPC/nurse) are  
7 subsequently compared to this level, and resources are considered to be appropriately  
8 allocated when the actual NWL is at this level (19, 21). This would mean that a satisfactory  
9 number of nurses, neither too many nor too few, are being allocated to provide care for the  
10 actual patient group.  
11  
12  
13  
14  
15

16  
17 We have found only two studies (8,18) on the relationship between nursing workload based  
18 on assessed requirements for care (as opposed to nurse patient ratios or equivalent measures)  
19 and patient outcomes. Needleman et al (8) found a significant association between patient  
20 mortality and increased exposure to unit shifts when nurse staffing was below the target level.  
21 In a recent study by Junttila et al (18) based on monthly means, the incidence rate of death  
22 when average daily NWL was above the assumed optimal level was 13-fold that when the  
23 average daily NWL was below this level. However, to our knowledge, no studies exist on this  
24 relationship using daily-level data.  
25  
26  
27  
28  
29  
30

31  
32 The aim of this observational study was therefore to investigate whether the daily workload  
33 per nurse (OPC/nurse), as a measure based on the RAFAELA system, correlates with patient  
34 safety incidents and patient mortality, using data collected on a daily basis. In addition, we  
35 wanted to compare the estimates with those based on the standard patients-to-nurse ratio  
36 (patients/nurse).  
37  
38  
39  
40

## 41 **METHODS**

### 42 **Study setting**

43  
44  
45 We obtained data from 36 units from four Finnish hospitals. One (A, 9 units) is a tertiary  
46 acute care hospital, whereas the three others (B, 14 units; C, 4 units; D, 9 units) are secondary  
47 acute care hospitals. The following specialties were included in the data material: internal  
48 medicine (8 units), surgical (8 units), pediatrics (5 units), gynecology (4 units), maternity (2  
49 units), neurology (2 units), orthopedics (2 units), oncology (1 unit), rehabilitation (1 unit),  
50 lung (1 unit), and otology (1 unit). Inclusion criteria were daily use of the RAFAELA system  
51  
52  
53  
54  
55  
56  
57  
58  
59  
60

1  
2  
3 according to standards, reliable nursing intensity data as expressed in terms of a yearly  
4 reliability test done by parallel classifications (requirement is that unanimity is over 70 per  
5 cent), and applicable nursing intensity level measured with the PAONCIL method (16,19-21).  
6 Units that had undergone major organizational changes over the previous year were excluded.  
7 The A and B data represent the period January 1 to December 31, 2012, and the C and D data  
8 represent the period January 1 to December 31, 2013.  
9  
10  
11  
12  
13

14 This study received approval from the chief administrative physicians of all four hospitals  
15 involved. No further ethical approval was therefore necessary, which is in accordance with the  
16 regulatory regime for conducting health research in Finland. We did not include any sensitive  
17 health-related data of patients in the study, or any information regarding characteristics of the  
18 nurses. The RAFAELA is owned by the Association of Finnish Local and Regional  
19 Association Authorities and governed by non-commercial Finnish Consulting Group Ltd.  
20  
21  
22  
23  
24

### 25 **Measurement of NWL in the RAFAELA nursing intensity and staffing system**

26  
27  
28 The RAFAELA is a standardized, person-centered, evidence-based system for nurse staffing  
29 that was developed in the 1990s (16, 19). The feasibility, validity, and reliability of the  
30 RAFAELA have been tested with good results (16, 18, 21, 22). It is now used in about 90 per  
31 cent of the hospitals in Finland, and has lately been implemented in Iceland, the Netherlands,  
32 Sweden, and Norway (22). A requirement for users of the RAFAELA system is that the  
33 interrater reliability for nursing intensity measurements should be tested yearly.  
34  
35  
36  
37  
38  
39

40 The daily nursing intensity of each unit is assessed by all the responsible registered nurses on  
41 each day. One registered nurse usually classify one to six patients per day. The assessment is  
42 done every day by classifying each patient's care needs by the Oulu Patient Classification Q  
43 (OPC) instrument. This instrument consists of six sub-areas of nursing care. The nursing  
44 intensity level varies from 6 to 24 points for an individual patient per calendar day (16, 19).  
45 The nurses' workload is calculated by dividing the total amount of nursing intensity points on  
46 the unit, e.g. 350, with the number of nurses who take care of patients, e.g. 12, during the  
47 same 24 hours. In this example, the patient-related NWL will then be 29.2 OPC points per  
48 nurse (hereafter referred to as OPC/nurse).  
49  
50  
51  
52  
53  
54  
55  
56  
57  
58  
59  
60

1  
2  
3 The underlying assumption of the RAFAELA system is that the nature and characteristics of  
4 nursing care differ between wards. The recommended NWL of each ward therefore has to be  
5 determined by the PAONCIL method. The development, testing and description of this  
6 method has been reported in several publications (16,19-22). Thus, the method is used to  
7 assess each ward's recommended optimal NWL including various contextual and  
8 organizational factors (21). The recommendation is that this level has to be reassessed by  
9 conducting the PAONCIL study every second year. The ones utilised in this study were not  
10 older than two or three years. The basic idea of the RAFAELA system is that the observed  
11 NWL (e.g. 29.2 points/nurse) is compared with the established preferred for the same unit  
12 (e.g. 22-30 points/nurse). If the observed NWL lies within the established limits, the nursing  
13 intensity is considered to be at the assumed optimal level.  
14  
15  
16  
17  
18  
19  
20  
21

22 The data we use in this paper consist of daily measurements based on the RAFAELA system  
23 (19). They correspond to every admitted patient's nursing intensity during one year and were  
24 based on 249,123 classifications of patients' nursing intensity (OPC classifications). Each  
25 day, the patient-related nurse resources were also recorded, using a standardized model where  
26 non-patient related time was excluded. Apart from each day's staff data (OPC/patient,  
27 OPC/nurse, etc.), there was daily information also on patient incidents and patient mortality.  
28 All data were collected during a period of one year, meaning that there were 12,475 data  
29 points (not approximately 13,140, since some wards were closed for shorter periods, foremost  
30 because of holidays). Table 1 provides the central variables of the data in terms of each unit's  
31 PAONCIL level, daily mean number of classified patients, daily mean number of OPC  
32 classifications, total OPC points, nursing staff resources, number of patients per nurse, OPC  
33 points per nurse, incidents, and deaths (see Table 1).  
34  
35  
36  
37  
38  
39  
40  
41  
42

43 (Insert Table 1 here)  
44  
45

## 46 **Outcomes**

47  
48  
49

50 Data on incidents were collected daily from The Reporting System for Safety Incidents in  
51 Health Care Organizations (HaiPro), which is a comprehensive and standardized patient  
52 safety system in Finland (23, 24). As defined by HaiPro, an incident is a safety hazard that  
53 may harm or harm the patient. Incidents are classified into 14 categories (24), but there are  
54 two main categories: near miss, which may have caused harm to the patient, but was  
55  
56  
57  
58  
59  
60

1  
2  
3 prevented by chance or by timely preventive actions, and adverse events, which are negative  
4 events that caused harm to the patient. To roughly capture the severity of an event, we  
5 categorized incidents in four ways: (1) whether at least one incident, of any type, occurred  
6 (Incident), (2) whether a patient was affected to any degree (Patient affected), (3) whether the  
7 incident caused harm to the patient (Harm to patient), and (4) whether there was more than  
8 one incident, of any type, on the same day (>1 incident), within the available follow-up of 365  
9 days. In addition, we used patient mortality (Death) as a fifth type of adverse event. Some  
10 wards had no deaths during the study period, but excluding them from the analyses would not  
11 affect the results to any noteworthy degree. The mortality data were retrieved from the local  
12 mortality register of each hospital.  
13  
14  
15  
16  
17  
18  
19

### 20 **Statistical analyses**

21  
22  
23 Using logistic regression analyses, associations were estimated on the daily level between  
24 nursing intensity per nurse (OPC/nurse) in relation to the assumed optimal level and each type  
25 of outcome, i.e., each of the four types of incidents and mortality. For each of type of  
26 outcome, the event was coded as 0 or 1, meaning that either there was no event during that  
27 specific day, or there was an event. The use of logistic regression models accommodate any  
28 issues related to non-normal distributions. We estimated associations both in unadjusted  
29 models and in models that adjusted for ward-specific effects and effects of day of the week,  
30 holiday and season, using dummy variables. Thus, we allowed for heterogeneity in the  
31 intercept term, which was motivated by the fact that across-ward variability was fairly  
32 modest. The categories of the variables are described in the footnotes of Table 2 (see Table 2).  
33 Parallel analyses were performed with the standard measure of nursing workload,  
34 patients/nurse. Supplementary electronic files provide full details of the models estimated (see  
35 Supplementary file 1).  
36  
37  
38  
39  
40  
41  
42  
43  
44  
45

46 We report results in which evaluations based on the RAFAELA system (OPC/nurse) were  
47 assessed using the assumed optimal level with a  $\pm 15\%$  deviation around this point (16, 19,  
48 21), and in which the patients/nurse measure was assessed using a categorization with three  
49 equally large groups. The results reported (in Table 2), were consequently based on 20  
50 different regressions. Model fit indices (-2 log likelihood, Akaike information criterion, and  
51 Nagelkerke R Square) are provided to facilitate comparisons between regressions based on  
52  
53  
54  
55  
56  
57  
58  
59  
60



1  
2  
3 the OPC/nurse measure and the patients/nurse measure. The analyses were performed using  
4 SPSS 21. All estimates are expressed in terms of odds ratios with 95% confidence intervals.  
5  
6

7  
8 Apart from comparing the predictive accuracy of the models that utilize the OPC/nurse  
9 measure and the patients/nurse measure, respectively, we have also used decision-analytic  
10 methods (25). These ascertain the value of prediction models by incorporating information on  
11 consequences and they require explicit valuation of outcomes. The technique may thus help in  
12 deciding on which measure to prefer, that is, the one with a higher net benefit.  
13  
14  
15

## 16 17 **RESULTS**

18  
19  
20 When OPC/nurse was above the assumed optimal level, the unadjusted odds for a patient  
21 safety incident were 1.28 (95% CI: 1.13-1.45) that of the assumed optimum level (see Table  
22 2). Corresponding odds ratios for the other types of incidents, patient affected, harm to  
23 patient, and >1 incident, were 1.13 (95% CI: 0.96-1.32), 1.16 (95% CI: 0.93-1.45), and 1.25  
24 (95% CI: 0.95-1.66), respectively. Odds ratios for patient mortality was even higher, or 1.42  
25 (95% CI: 1.19-1.69). If OPC/nurse was below the recommended optimal level, the odds ratio  
26 for incidents and patient mortality were, conversely lower, or around 0.67 for the different  
27 types of incidents, and 0.55 for patient mortality.  
28  
29  
30  
31  
32  
33

34  
35 (Insert Table 2 here)  
36  
37

38  
39 When ward-specific effects and effects of day of the week, holiday and season were adjusted  
40 for, the odds ratios diminished somewhat (see Table 2). Nursing workload above the assumed  
41 optimal level was associated with 8-34 per cent higher odds of an incident, depending on the  
42 type of incident, and 43 per cent higher odds of patient mortality, as compared to if it was at  
43 the assumed optimal level. If OPC/nurse was below this level, the odds ratio for an incident  
44 and for patient mortality was approximately 25 per cent lower. Adding the ward-specific  
45 effects improved model fit considerably. Also the variables for weekday, holiday, and season  
46 improved the model fit, except for the outcomes >1 incident and death. The odds for incidents  
47 were in general least likely to occur on Saturdays and on holidays, whereas there were no  
48 obvious seasonal effects (not shown here). Complete descriptions of all estimates and the  
49 models estimated, with predictive indices, can be found in the supplementary electronic file  
50 (see Supplementary file 1).  
51  
52  
53  
54  
55  
56  
57  
58  
59  
60

1  
2  
3  
4 The two lower panels in Table 2 provide results of parallel analyses when nursing workload  
5 was measured according to the standard patients-to-nurse ratio (patients/nurse). As compared  
6 with results based on the RAFAELA system, there are three main issues to be pointed out.  
7 First, effects sizes in terms of odds ratios were consistently smaller with the patients/nurse  
8 approach than with the OPC/nurse approach, irrespective if unadjusted or adjusted models are  
9 compared. For instance, in the fully adjusted model, the odds ratio of an incident was 1.13  
10 (95% CI: 0.96-1.33) if workload was in the highest one-third, and 0.89 (95% CI: 0.75-1.05) if  
11 it was in the lowest one-third, as compared to if it was in the middle one-third. These effects  
12 were notably smaller than the estimated relative effect sizes for being above and below the  
13 recommended optimum according to the RAFAELA system, which were 1.24 (95% CI: 1.08-  
14 1.42) and 0.79 (95% CI: 0.67-0.93), respectively. Second, in almost all instances, the  
15 estimates of the patients/nurse approach had smaller statistical power in terms of wider  
16 confidence intervals (i.e., larger standard errors). However, far from all estimates for the  
17 OPC/nurse measure, or for the patients/nurse measure, were statistically significant at the five  
18 per cent level. Third, when comparing results for the patients/nurse measure to the OPC/nurse  
19 measure for otherwise similar models and outcomes, the model fit of the former was  
20 consistently poorer (values of the log likelihood and AIC were higher and R square lower). It  
21 nevertheless needs to be stressed that the difference was not very large.  
22  
23  
24  
25  
26  
27  
28  
29  
30  
31  
32  
33  
34

35 We experimented also with other ways to categorize nursing workload. For OPC/nurse, we  
36 used an alternative with a halved deviation from the recommended optimal point, i.e.,  $\pm 7.5\%$   
37 instead of  $\pm 15\%$ , and with a doubled deviation, i.e.,  $\pm 30\%$  from the optimal point. The  
38 patient-to-nurse measure was also assessed using alternative categorizations, such as five and  
39 seven equally large groups, respectively. Results of these additional regressions supported the  
40 overall conclusions as reported above. In models using the patients/nurse measure,  
41 associations were mostly weaker, came with lower statistical power, and they were less  
42 systematic, as compared to models based on the OPC/nurse measure (see Supplementary file  
43 1).  
44  
45  
46  
47  
48  
49  
50

51 Hence, our analyses suggest that, in terms of predictive accuracy, models estimated on basis  
52 of nursing workload according to the RAFAELA system are slightly to be preferred above  
53 otherwise similar models that use the standard patients/nurse measure. It is not evident,  
54 however, which measure is to be preferred when it comes to decision making. Figures 1 to 5  
55  
56  
57  
58  
59  
60

1  
2  
3 summarizes net benefit values calculated based on the models estimated for each type of  
4 patient safety incident and patient mortality, respectively; see (25) for technical details. The  
5 values have been calculated over a reasonable range for the probability of an event (type of  
6 incident or mortality). Models based on the OPC/nurse measure and the patients/nurse  
7 measure are to be compared by looking at the net benefit values (see Figure 1, Figure 2,  
8 Figure 3, Figure 4, Figure 5). The one with higher net benefit values is to be preferred above  
9 the other. As shown by the figures, there is no clear discrepancy. For some threshold  
10 probabilities, the OPC/nurse measure lies above the patients/nurse measure, while for others,  
11 the situation is the opposite. In addition, for each event (type of incident and mortality), the  
12 two curves are essentially overlapping, and in most instances the difference in net benefit  
13 values is rather modest. In terms of the magnitude of the benefit for patients, it is  
14 consequently not evident which measure of nursing workload is to be preferred.

15  
16  
17  
18  
19  
20  
21  
22 (Insert Figure 1 here)

23 (Insert Figure 2 here)

24 (Insert Figure 3 here)

25 (Insert Figure 4 here)

26 (Insert Figure 5 here)

## 31 **DISCUSSION**

32  
33 We find that the odds for a patient safety incident was 10-30 per cent higher, and for patient  
34 mortality about 40 per cent higher, if the nursing workload as measured by the RAFAELA  
35 system (OPC/nurse) was above the assumed optimal level, as compared to if it was at this  
36 level. If OPC/nurse was below the level, the odds for a patient safety incident and for  
37 mortality was approximately 25 per cent lower. The latter situation would mean that nurses  
38 have more time for caring and observing each patient, which may reduce the risk for adverse  
39 events and accordingly prevent the patient's health condition from deteriorating.

40  
41  
42  
43  
44  
45  
46 Previous research (9) did not find significant changes in patient safety associated with  
47 decreased NWL and could not confirm compliance with ratios per shift. Other studies used  
48 hospital-level administrative data that imprecisely allocated staffing to patients' care needs (8,  
49 11). We think that such associations between nurse staffing, patient outcomes and mortality  
50 may be challenged (12, 18). Needleman et al. (8) found similar results between mortality and  
51 day-to-day, shift-to-shift variation in staffing, and Junttila et al. (18) between mortality and  
52 days with NWL over optimal level on a monthly level. The OPC/nurse measure is more  
53  
54  
55  
56  
57  
58  
59  
60

1  
2  
3 detailed than the traditional patients/nurse measure. While comparable to the 'hours per  
4 patient day model' (26), its accuracy of nursing resources is higher. For example, if a nurse  
5 becomes sick during a shift and leaves the unit, the nurse in charge will deduct these hours  
6 from the unit's resources.  
7  
8

9  
10 Several factors affect the reporting of incidents, e.g., staff's lack of motivation or knowledge,  
11 nurse staff shortage, stressful situations, or burn out. A reasonable argument is therefore that a  
12 very high NWL indicates a working situation where the nurse staff resources are too low.  
13 Still, too few resources can result in the deprioritization of the registration of adverse events  
14 and thus the underreporting of incidents connected to high NWL, which may affect the results  
15 of our study and the conclusions that we draw.  
16  
17  
18  
19  
20  
21

22 Our study provided results based on daily measures of all-in-hospital patients' actual nursing  
23 intensity, including detailed registration of used staff resources and the association with  
24 incidents and mortality on daily levels. The HaiPro database, upon which our analyses were  
25 based, meets WHO criteria for a good reporting system (23, 24). However, we know that  
26 despite a good reporting system, incidents reports are missing due to several reasons, such as  
27 lack of time, personnel's involvement etc. The Global Trigger Tool (GTT) is another method  
28 to analyze patient safety, which has been recommended (27). However, it collects triggers and  
29 patient safety incidents from treatment periods, not on a daily basis, whereas data on incidents  
30 collected from HaiPro can be targeted to certain days (24). Units that underwent major  
31 organizational changes over the previous year were excluded from our study, because they  
32 may negatively influence the data quality including incident reports. The accuracy of the data  
33 used, in terms of NWL, incidents, and mortality, is highly reliable and probably better than in  
34 previous studies on NWL and adverse outcomes. The staffing measurement determined by the  
35 RAFAELA system implicitly considers specific characteristics of each ward, such as  
36 organizational factors in terms of unit size, leadership, and physical environment (16,19,21).  
37  
38  
39  
40  
41  
42  
43  
44  
45  
46  
47

48 We found evidence that a staffing measure based on daily measurement of individual patient  
49 care needs and the recommended NWL (OPC/nurse) is slightly better in predicting incidents  
50 and mortality rates as compared the standard patient-to-nurse measure. Yet it needs to be  
51 stressed that, based on decision curve analysis, it was not clear which measure of nursing  
52 work load will produce higher net benefit in terms of avoiding patient safety incidents and  
53  
54  
55  
56  
57  
58  
59  
60

1  
2  
3 patient mortality. Current findings therefore ought to be further investigated and the findings  
4 replicated in larger, longitudinal multicenter studies.  
5  
6

7  
8 A strength of this study is that the analyses were conducted based upon nurses' independent  
9 classifications of patients' nursing intensity. The data used was based on a scientifically tested  
10 NWL system, which enabled comparisons (16), since the patient-case mix and patient severity  
11 groups require different staff resources to maximize positive patient outcomes (4, 8, 18, 28,  
12 29). NWL consequently ought to be monitored daily using reliable instruments to ensure good  
13 patient outcomes. Such optimal resource allocation is needed for successful leadership and  
14 clinical governance, and it is crucial for favorable outcomes, to preventing adverse events and  
15 to reducing patient mortality.  
16  
17  
18  
19  
20  
21

22 Our study nevertheless has certain limitations. The reliability of incident reports can always  
23 be questioned, despite that the HaiPro system has been in systematic use for almost ten years.  
24 Although we could control for ward-specific effects and effects of day of the week, holiday  
25 and season, there might be other confounding factors. Hospital settings are characterized by  
26 complexity regarding factors that may affect total NWL (1, 2, 13, 28-31). While a list of  
27 central organizational and contextual factors were included in the PAONCIL instrument, we  
28 did not address the effects of skill-mix, competence level or work experience on patient  
29 outcomes. Physicians' patient-related direct time and health care support should also probably  
30 be included in further studies (32). Further analyses of other patient characteristics, such as  
31 age, sex or diagnoses, were not conducted because the OPC instrument takes these variables  
32 into account. Earlier studies have shown that the OPC instrument identifies patients'  
33 individual characteristics such as functional ability, symptoms of diseases, and the effect on  
34 nursing intensity of the most central patient characteristics (16, 22). Hence, the measurement  
35 by the OPC covers the actual patient case mix for each day. However, the contribution of  
36 these aspects, especially age and sex, may be analyzed in more detail in further studies.  
37  
38 Another limitation was that a death or an incident caused by low staffing on a ward on one  
39 day may not always occur on that same day or at that same ward. This could be explored by  
40 analyzing patient records around the critical days and at multiple wards. Although this study  
41 was the first about the relationship between the assumed optimal NWL and daily outcomes, a  
42 multi-center study with several hospitals is needed to further test the generalizability of the  
43 results.  
44  
45  
46  
47  
48  
49  
50  
51  
52  
53  
54  
55  
56  
57  
58  
59  
60

## Conclusions

This study has showed that a work situation above the assumed optimal level increases the risk for adverse events and patient mortality. However, the resources for nursing staff are limited in all organizations. Nurse managers therefore have to use available resources in the most optimal way. This study provided some new evidence to suggest that the traditional nurse staffing method, the patient-to-nurse ratio, is not necessarily preferable when it comes to controlling for patients' severity and case mix. The staffing measure based on the assumed optimal NWL may therefore be considered a novel attempt to fill a gap in the existing knowledge on leadership and clinical governance. Efficient resource allocation is needed for successful leadership and clinical governance and it is crucial for favorable outcomes, for preventing adverse events and for reducing the mortality risk. Future research is needed to ascertain whether good patient outcomes are ensured by daily monitoring of nurses' workload with instruments like the one studied here.

**Contributors** LF did the literature search. LF and JS designed the study. LF collected the data. JS prepared the data and performed the analyses. LF, MK and JS contributed to data interpretation, writing, and revision of the report.

**Funding** The authors disclosed receipt of the following financial support for the research and authorship for this article: The State Research Funding of Vaasa Hospital District based on the Health Care Act (1326/2010).

**Competing interest** The authors (LF, MK, JS) declared no potential conflicts of interest with respect to the research, authorship, and/or publication of this article.

**Data Sharing** Full descriptions of all models estimated and their estimates are found in the supplementary electronic files.

## References

- 1 Aiken LH, Clarke SP, Sloane DM, et al. Hospital nurse staffing and patient mortality, nurse burnout, and job dissatisfaction. *JAMA* 2002;288:1987-93.
- 2 Aiken LH, Cimiotti JO, Sloane DM. Effects of nurse staffing and nurse education on patient deaths in hospitals with different nurse work environments. *Med Care* 2011;49:1047-53.

- 1  
2  
3 3 Aiken LH, Sloane DM, Bruyneel L, et al. Nurse staffing and education and hospital  
4 mortality in nine European countries: a retrospective observational study. *Lancet*  
5 2014; 383: 1824-30.
- 6  
7  
8 4 Seago JA, Williamson A, Atwood C. Longitudinal analyses of nurse staffing and  
9 patient outcomes more about failure to rescue. *JONA* 2006;36:13-21.
- 10  
11 5 Rafferty AM, Clarke SP, Coles J, et al. Outcomes of variation in hospital nurse  
12 staffing in English hospitals: Cross-sectional analysis of survey data and discharge  
13 records. *Int J Nurs Stud* 2007;44:175-82.
- 14  
15 6 Zingg W, Holmes A, Dettenkofer M, et al. Hospital organization, management, and  
16 structure for prevention of health-care-associated infection: a systematic review and  
17 expert consensus. *Lancet Inf Dis* 2015;15:212-24.
- 18  
19 7 Lang TA, Hodge M, Olson V, et al. Nurse-patient ratios: a systematic review on the  
20 effects of nurse staffing on patient, nurse employee, and hospital outcomes. *JONA*  
21 2004; 34: 326-37.
- 22  
23 8 Needleman J, Buerhaus P, Pankratz VS, et al. Nurse staffing and inpatient hospital  
24 mortality. *N Eng J Med* 2011;364:1037-45.
- 25  
26 9 Donaldson N, Bolton LB, Aydin C, et al. Impact of California's licensed nurse-patient  
27 ratios on unit-level nurse staffing and patient outcomes. *Policy Polit Nurs Prac* 2005;  
28 6:198-10.
- 29  
30 10 Kane RL, Shamliyan TA, Mueller C, et al. The association of registered nurse staffing  
31 levels and patient outcomes: systematic review and meta-analysis. *Med Care*  
32 2007;45:1195-04.
- 33  
34 11 Shuldham C, Parkin C, Firouzi A, et al. The relationship between nurse staffing and  
35 patient outcomes: A case study. *Int J Nurs Stud* 2009;46:986-92.
- 36  
37 12 Van den Heede K, Sermeus W, Diya L, et al. Nurse staffing and patient outcomes in  
38 Belgian acute hospitals: cross-sectional analysis of administrative data. *Int J Nurs Stud*  
39 2009;46:928-39.
- 40  
41 13 Tarnow-Mordi WO, Hau C, Warden A, et al. Hospital mortality in relation to staff  
42 workload: a 4-year study in an adult intensive-care unit. *Lancet* 2000;356:185-89.
- 43  
44 14 Lankshear AJ, Sheldon TA, Maynard A. Nurse staffing and healthcare outcomes: a  
45 systematic review on the effects of nurse staffing on patient, nurse employee, and  
46 hospital outcomes. *JONA* 2005;28:163-74.
- 47  
48  
49  
50  
51  
52  
53  
54  
55  
56  
57  
58  
59  
60

- 15 National Institute for Health and Care Excellence. Safe Staffing for nursing in adult inpatient wards in acute hospitals. Safe staffing guideline1. 2014. [http://:www.nice.org.uk/sg1](http://www.nice.org.uk/sg1).
- 16 Rauhala A. The validity and feasibility of measurement tools for human resources management in nursing case of the RAFAELA system. Doctoral dissertation. Department of Health Policy and Management, University of Kuopio. 2008.
- 17 Adomat R & Hewison A. Assessing patient category/dependence systems for determining the nurse/patient ratio in ICU and HDU: a review of approaches. *Nurs Manag* 2004;12:299-08.
- 18 Junttila JK, Koivu A, Fagerström L, Haatainen K, Nykänen P. 2016. Hospital mortality and optimality of nursing workload: a study on predictive validity of the RAFAELA Nursing Intensity and Staffing system. *Int J Nurs Stud* 2016;60:46-53.
- 19 Rauhala A & Fagerström L. Determining optimal nursing intensity: the RAFAELA method. *Journal of Advanced Nursing* 2004;45:351-359.
- 20 Rauhala A, Kivimäki M, Fagerström L. What degree of work overload is likely to cause increased sickness absenteeism among nurse? Evidence from the RAFAELA patient classification system. *J Adv Nurs* 2007;57:286-95.
- 21 Fagerström L, Rainio A-K, Rauhala A, et al. Professional assessment of optimal nursing care intensity level a new method for resource allocation as an alternative to classical time studies. *Scand J Cari Sci* 2000;14:97-104.
- 22 Andersen MH, Lønning K, Bjørnelv GM, Fagerström L. Nursing intensity and costs of nurse staffing demonstrated by the RAFAELA system: livers. Kidney transplant recipients. *J Nurs Manag* 2016;24:798-805.
- 23 Kinnunen M. Learning from errors in organization – Factors preventing or making it possible. Doctoral thesis. University of Vaasa. *Acta Wasaensia*, 230.
- 24 Holmström A-R. Learning from Medication errors in healthcare – how to make medication error reporting systems work? Doctoral dissertation. Faculty of Pharmacy, University of Helsinki. 2017.
- 25 Vickers AJ, Elkin, EB. Decision curve analysis: a novel method for evaluating prediction models. *Med Decis Making* 2006;26:565-74.
- 26 Spetz J, Donaldson N, Aydin C, et al. How many nurses per patient? Measurements of nurse staffing in health services research. *Health Serv Res* 2008 43:1674-92.



- 1  
2  
3 27 Classen DC, Resar R, Griffin F, et al. 2011 'Global trigger tool' shows that adverse  
4 events in hospitals may be ten times greater than previously measured. Health Aff  
5 (Millwood) 2011;30:581-9  
6  
7 28 Needleman J, Buerhaus P, Mattke S, Stewart M, Zelevinsky K. Nurse-staffing levels  
8 and the quality of care in hospitals. N Engl J Med 2002;346:1715-22.  
9  
10 29 Griffiths P, Ball J, Drennan J. et al. Nurse staffing and patient outcomes: Strengths and  
11 limitations of the evidence to inform policy and practice. A review and discussion  
12 paper based on evidence reviewed for the National Institute for Health and Care  
13 Excellence Safe Staffing guideline development. Int J Nurs Studies 2016. DOI:  
14 <http://dx.doi.org/10.1016/j.ijnurstu.2016.03.012>  
15  
16 30 Fasioli DR, Fincke BG, Haddock KS. Going beyond patient classification systems to  
17 create an evidence-based staffing methodology. J of Nurs Adm 2011;41:434-9.  
18  
19 31 Cho SH, Hwang JH, Kim J. Nurse staffing and patient mortality in intensive care  
20 units. Nurs Res 2008;57:322-30.  
21  
22 32 Kerlin MP, Small DS, Cooney E, et al. A randomized trial of nighttime physician  
23 staffing in an intensive care unit. N Engl J Med 2013;368:2201-09.  
24  
25  
26  
27  
28  
29  
30  
31  
32  
33  
34  
35  
36  
37  
38  
39  
40  
41  
42  
43  
44  
45  
46  
47  
48  
49  
50  
51  
52  
53  
54  
55  
56  
57  
58  
59  
60

1  
2  
3  
4  
5  
6  
7  
8  
9  
10  
11  
12  
13  
14  
15  
16  
17  
18  
19  
20  
21  
22  
23  
24  
25  
26  
27  
28  
29  
30  
31  
32  
33  
34  
35  
36  
37  
38  
39  
40  
41  
42  
43  
44  
45  
46  
47

Table 1. Assumed optimal work load, and daily mean values of workload, staff resources and adverse events per ward in the data

| Ward, id      | Optimal load, lower bound | Optimal load, upper bound | OPC per nurse | Patients per nurse | OPC    | OPC per patient | Number of nurses | Incident | Patient affected | Harm to patient | >1 incident | Death | n   | Number of OPC classifications |
|---------------|---------------------------|---------------------------|---------------|--------------------|--------|-----------------|------------------|----------|------------------|-----------------|-------------|-------|-----|-------------------------------|
| D Infectious* | 18.90                     | 25.56                     | 21.06         | 1.48               | 251.22 | 14.20           | 12.03            | 0.09     | 0.06             | 0.02            | 0.01        | 0.04  | 365 | 17.70                         |
| D Internal**  | 21.85                     | 29.55                     | 24.45         | 1.60               | 308.81 | 15.28           | 12.74            | 0.13     | 0.07             | 0.04            | 0.02        | 0.07  | 362 | 20.18                         |
| D Cardiology  | 21.88                     | 29.60                     | 25.98         | 1.89               | 355.99 | 13.75           | 13.98            | 0.26     | 0.11             | 0.08            | 0.03        | 0.08  | 365 | 25.90                         |
| D Surgical    | 16.85                     | 22.79                     | 23.88         | 1.41               | 425.36 | 16.87           | 17.80            | 0.05     | 0.02             | 0.01            | 0.00        | 0.08  | 365 | 25.19                         |
| D Orthopedics | 15.99                     | 21.63                     | 21.92         | 1.41               | 350.84 | 15.52           | 16.15            | 0.12     | 0.08             | 0.04            | 0.02        | 0.05  | 365 | 22.62                         |
| D Surgical    | 14.54                     | 19.66                     | 17.58         | 1.24               | 243.46 | 14.18           | 13.75            | 0.07     | 0.05             | 0.04            | 0.01        | 0.02  | 330 | 17.15                         |
| D Maternal    | 25.47                     | 34.47                     | 33.83         | 2.48               | 343.10 | 13.62           | 10.12            | 0.04     | 0.02             | 0.01            | 0.00        | 0.00  | 364 | 25.17                         |
| D Oncology    | 14.36                     | 20.12                     | 22.84         | 1.38               | 249.46 | 16.50           | 10.88            | 0.26     | 0.11             | 0.05            | 0.03        | 0.18  | 362 | 15.10                         |
| D Neurology   | 20.05                     | 27.13                     | 25.12         | 1.34               | 392.29 | 18.69           | 15.76            | 0.13     | 0.05             | 0.03            | 0.02        | 0.08  | 365 | 20.96                         |
| B Internal**  | 16.14                     | 21.83                     | 20.40         | 1.49               | 182.62 | 13.75           | 8.95             | 0.12     | 0.09             | 0.07            | 0.02        | 0.06  | 341 | 13.29                         |
| B Internal**  | 20.37                     | 27.56                     | 25.13         | 2.00               | 290.05 | 12.61           | 11.59            | 0.23     | 0.16             | 0.10            | 0.06        | 0.08  | 365 | 23.04                         |
| B Internal**  | 17.16                     | 23.21                     | 19.94         | 1.47               | 171.98 | 13.54           | 8.59             | 0.20     | 0.11             | 0.07            | 0.06        | 0.05  | 365 | 12.69                         |
| B Internal**  | 19.65                     | 26.59                     | 24.16         | 1.82               | 292.34 | 13.24           | 12.11            | 0.11     | 0.07             | 0.05            | 0.01        | 0.13  | 365 | 22.09                         |
| B Surgical    | 21.47                     | 29.04                     | 29.16         | 2.00               | 544.95 | 14.59           | 18.73            | 0.20     | 0.16             | 0.10            | 0.01        | 0.16  | 365 | 37.34                         |
| B Surgical    | 18.50                     | 25.10                     | 23.29         | 1.77               | 355.67 | 13.18           | 15.37            | 0.08     | 0.05             | 0.03            | 0.02        | 0.08  | 365 | 26.95                         |
| B Surgical    | 23.27                     | 31.48                     | 28.04         | 1.88               | 474.66 | 14.90           | 17.01            | 0.12     | 0.08             | 0.01            | 0.02        | 0.05  | 365 | 31.85                         |
| B Gynecology  | 18.87                     | 25.54                     | 23.17         | 1.68               | 131.87 | 14.04           | 6.21             | 0.13     | 0.10             | 0.02            | 0.02        | 0.02  | 177 | 9.45                          |
| B Maternity   | 19.05                     | 25.78                     | 20.69         | 1.37               | 338.39 | 15.04           | 16.40            | 0.03     | 0.02             | 0.02            | 0.00        | 0.00  | 365 | 22.48                         |
| B Pediatrics  | 11.51                     | 15.58                     | 13.08         | 0.75               | 134.87 | 17.39           | 10.23            | 0.04     | 0.03             | 0.01            | 0.00        | 0.00  | 362 | 7.72                          |
| B Pediatrics  | 12.16                     | 16.45                     | 8.65          | 0.49               | 108.10 | 17.52           | 12.38            | 0.02     | 0.01             | 0.00            | 0.00        | 0.00  | 365 | 6.17                          |
| B Otollogy    | 17.45                     | 23.60                     | 22.45         | 1.81               | 224.67 | 12.36           | 9.87             | 0.11     | 0.07             | 0.04            | 0.01        | 0.01  | 298 | 18.12                         |
| B Neurology   | 16.25                     | 21.98                     | 19.37         | 1.37               | 245.29 | 14.24           | 12.68            | 0.08     | 0.06             | 0.01            | 0.01        | 0.07  | 365 | 17.30                         |
| B Lung        | 20.02                     | 27.09                     | 19.43         | 1.50               | 273.30 | 12.97           | 14.05            | 0.10     | 0.08             | 0.01            | 0.02        | 0.11  | 365 | 21.05                         |
| C Surgical    | 22.60                     | 30.60                     | 24.33         | 1.41               | 321.42 | 17.29           | 13.22            | 0.17     | 0.08             | 0.03            | 0.07        | 0.06  | 365 | 18.58                         |
| C Internal**  | 18.70                     | 25.30                     | 25.15         | 1.65               | 397.05 | 15.20           | 15.93            | 0.17     | 0.09             | 0.01            | 0.05        | 0.15  | 366 | 26.12                         |
| C Internal**  | 20.40                     | 27.60                     | 21.77         | 1.29               | 208.62 | 16.87           | 9.52             | 0.10     | 0.09             | 0.01            | 0.02        | 0.03  | 291 | 12.33                         |

|                 |       |       |       |      |        |       |       |      |      |      |      |      |        |       |
|-----------------|-------|-------|-------|------|--------|-------|-------|------|------|------|------|------|--------|-------|
| C Surgical      | 19.40 | 26.30 | 23.70 | 1.51 | 228.64 | 15.64 | 9.49  | 0.04 | 0.03 | 0.00 | 0.01 | 0.00 | 291    | 14.58 |
| A Gynecology    | 19.50 | 26.40 | 24.92 | 1.83 | 290.61 | 13.60 | 11.39 | 0.03 | 0.02 | 0.01 | 0.00 | 0.00 | 366    | 21.14 |
| A Gynecology    | 25.60 | 42.10 | 39.84 | 2.81 | 510.25 | 14.21 | 12.83 | 0.04 | 0.03 | 0.02 | 0.00 | 0.00 | 225    | 35.94 |
| A Gynecology    | 33.50 | 45.30 | 40.54 | 2.85 | 607.06 | 14.22 | 15.06 | 0.04 | 0.02 | 0.02 | 0.00 | 0.00 | 366    | 42.64 |
| A Ortopedics    | 16.80 | 22.70 | 20.29 | 1.33 | 430.29 | 15.18 | 21.19 | 0.10 | 0.05 | 0.02 | 0.02 | 0.04 | 366    | 28.30 |
| A Pediatrics    | 12.30 | 14.90 | 13.33 | 0.97 | 165.18 | 13.85 | 12.34 | 0.15 | 0.10 | 0.08 | 0.04 | 0.00 | 366    | 11.95 |
| A Pediatrics    | 11.00 | 14.20 | 11.16 | 0.70 | 117.12 | 16.05 | 10.57 | 0.09 | 0.06 | 0.02 | 0.01 | 0.01 | 360    | 7.31  |
| A Pediatrics    | 8.90  | 12.00 | 9.29  | 0.54 | 91.18  | 17.36 | 9.67  | 0.09 | 0.06 | 0.02 | 0.01 | 0.00 | 363    | 5.24  |
| A Surgical      | 21.10 | 28.50 | 24.45 | 1.48 | 273.20 | 16.50 | 11.24 | 0.02 | 0.02 | 0.01 | 0.00 | 0.06 | 364    | 16.54 |
| ARehabilitation | 15.10 | 20.50 | 20.57 | 1.49 | 198.98 | 13.89 | 9.51  | 0.14 | 0.12 | 0.03 | 0.04 | 0.00 | 315    | 14.52 |
| Total           | 18.52 | 25.22 | 22.41 | 1.53 | 294.59 | 14.97 | 12.93 | 0.11 | 0.07 | 0.03 | 0.02 | 0.05 | 12,475 | 19.97 |

Assumed optimal load refers to the established interval of optimal work load according to the Paoncil measurement (OPC per nurse).

The variables are described in more detail in the main text.

\*Infectious diseases; \*\*Internal medicine;

Table 2. Odds ratio for an adverse event (with 95% confidence interval) for four types of patient safety incidents and for patient mortality, according to nursing workload measurement by the RAFAELA system (OPC/nurse) and the standard nursing workload measurement system (patients/nurse), unadjusted and adjusted estimates

|                                  | Incident         | Patient affected | Harm to patient  | >1 incident      | Death            |
|----------------------------------|------------------|------------------|------------------|------------------|------------------|
| OPC/nurse, unadjusted model      |                  |                  |                  |                  |                  |
| Below optimum                    | 0.67 (0.58-0.78) | 0.68 (0.56-0.82) | 0.66 (0.50-0.88) | 0.67 (0.47-0.95) | 0.55 (0.43-0.70) |
| At optimum                       | 1                | 1                | 1                | 1                | 1                |
| Above optimum                    | 1.28 (1.13-1.45) | 1.13 (0.96-1.32) | 1.16 (0.93-1.45) | 1.25 (0.95-1.66) | 1.42 (1.19-1.69) |
| -2 log likelihood                | 8,577.5          | 6,169.3          | 3,523.0          | 2,406.4          | 4,958.6          |
| Akaike Information Criterion     | 8,561.5          | 6,173.3          | 3,527.0          | 2,410.4          | 4,962.6          |
| Nagelkerke R square              | 0.0106           | 0.0056           | 0.0052           | 0.0056           | 0.0160           |
| OPC/nurse, adjusted model        |                  |                  |                  |                  |                  |
| Below optimum                    | 0.79 (0.67-0.93) | 0.78 (0.64-0.96) | 0.85 (0.63-1.14) | 0.73 (0.50-1.07) | 0.78 (0.60-1.00) |
| At optimum                       | 1                | 1                | 1                | 1                | 1                |
| Above optimum                    | 1.24 (1.08-1.42) | 1.08 (0.91-1.28) | 1.11 (0.88-1.41) | 1.32 (0.98-1.79) | 1.43 (1.18-1.73) |
| -2 log likelihood                | 8,010.8          | 5,856.3          | 3,211.1          | 2,187.9          | 4,286.5          |
| Akaike Information Criterion     | 8,106.8          | 5,952.3          | 3,307.1          | 2,283.9          | 4,382.5          |
| Nagelkerke R square              | 0.0960           | 0.0688           | 0.1050           | 0.1041           | 0.1733           |
| Patients/nurse, unadjusted model |                  |                  |                  |                  |                  |
| 1st group                        | 0.74 (0.64-0.86) | 0.85 (0.71-1.02) | 0.79 (0.61-1.04) | 0.80 (0.58-1.10) | 0.47 (0.38-0.58) |
| 2nd group                        | 1                | 1                | 1                | 1                | 1                |
| 3rd group                        | 1.09 (0.95-1.25) | 1.18 (0.99-1.41) | 1.24 (0.96-1.58) | 0.95 (0.70-1.30) | 0.97 (0.81-1.17) |
| -2 log likelihood                | 8,589.1          | 6,180.9          | 3,525.1          | 2,416.5          | 4,958.8          |
| Akaike Information Criterion     | 8,593.1          | 6,184.9          | 3,529.1          | 2,420.5          | 4,962.8          |
| Nagelkerke R square              | 0.0055           | 0.0033           | 0.0045           | 0.0010           | 0.0159           |
| Patients/nurse, adjusted model   |                  |                  |                  |                  |                  |
| 1st group                        | 0.89 (0.75-1.05) | 0.98 (0.80-1.21) | 0.90 (0.66-1.23) | 1.01 (0.71-1.44) | 0.86 (0.68-1.08) |
| 2nd group                        | 1                | 1                | 1                | 1                | 1                |
| 3rd group                        | 1.13 (0.96-1.33) | 1.15 (0.94-1.41) | 1.03 (0.77-1.39) | 1.15 (0.81-1.64) | 1.20 (0.97-1.49) |
| -2 log likelihood                | 8,029.8          | 5,863.1          | 3,213.4          | 2,196.1          | 4,301.8          |
| Akaike Information Criterion     | 8,125.8          | 5,959.1          | 3,309.4          | 2,292.1          | 4,397.8          |
| Nagelkerke R square              | 0.0931           | 0.0674           | 0.1043           | 0.1004           | 0.1698           |
| Number of events                 | 1,367            | 848              | 400              | 246              | 636              |

The table summarises results from 20 different models estimated on 12,475 calendar days, representing 36 wards at four hospital units.

Adjusted model refers to models adjusted for ward-specific effects and effects of the week, holiday and season.

Estimates for ward-specific effects and effects of day of the week, holiday and season are found in the supplementary electronic files.

At optimum refers to the **assumed** optimal nursing intensity point with  $\pm 15\%$  deviation, as defined by the RAFAELA system.

Patients/nurse refers to a categorisation into three equally large groups.

Categories used for day of the week are Monday, Tuesday, Wednesday, Thursday, Friday, Saturday, and Sunday.

Categories used for holiday are No or Yes, where Yes refers to Easter, Midsummer, Christmas and New Year.

Categories used for season are January-March, April-May, June-August, September-October, and November-December.

## Figures legends

Figure 1. Decision curves for incident according to the OPC/nurse measure and patients/nurse measure, respectively

Figure 2. Decision curves for patient affected according to the OPC/nurse measure and patients/nurse measure, respectively

Figure 3. Decision curves for harm to patient according to the OPC/nurse measure and patients/nurse measure, respectively

Figure 4. Decision curves for >1 incident according to the OPC/nurse measure and patients/nurse measure, respectively

Figure 5. Decision curves for death according to the OPC/nurse measure and patients/nurse measure, respectively

1  
2  
3  
4  
5  
6  
7  
8  
9  
10  
11  
12  
13  
14  
15  
16  
17  
18  
19  
20  
21  
22  
23  
24  
25  
26  
27  
28  
29  
30  
31  
32  
33  
34  
35  
36  
37  
38  
39  
40  
41  
42  
43  
44  
45  
46  
47  
48  
49  
50  
51  
52  
53  
54  
55  
56  
57  
58  
59  
60

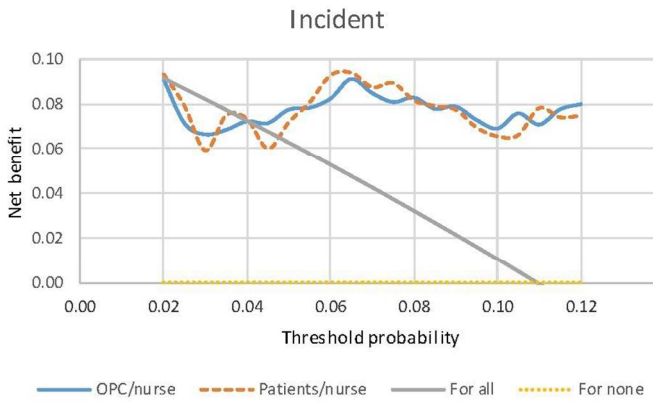

Figure 1. Decision curves for incident according to the OPC/nurse measure and patients/nurse measure, respectively

117x73mm (300 x 300 DPI)

view only



Figure 2. Decision curves for patient affected according to the OPC/nurse measure and patients/nurse measure, respectively

113x70mm (300 x 300 DPI)

1  
2  
3  
4  
5  
6  
7  
8  
9  
10  
11  
12  
13  
14  
15  
16  
17  
18  
19  
20  
21  
22  
23  
24  
25  
26  
27  
28  
29  
30  
31  
32  
33  
34  
35  
36  
37  
38  
39  
40  
41  
42  
43  
44  
45  
46  
47  
48  
49  
50  
51  
52  
53  
54  
55  
56  
57  
58  
59  
60

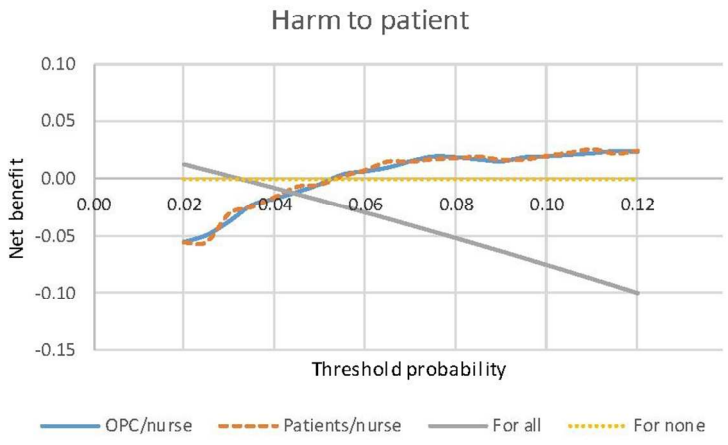

Figure 3. Decision curves for harm to patient according to the OPC/nurse measure and patients/nurse measure, respectively

107x70mm (300 x 300 DPI)

ew only



1  
2  
3  
4  
5  
6  
7  
8  
9  
10  
11  
12  
13  
14  
15  
16  
17  
18  
19  
20  
21  
22  
23  
24  
25  
26  
27  
28  
29  
30  
31  
32  
33  
34  
35  
36  
37  
38  
39  
40  
41  
42  
43  
44  
45  
46  
47  
48  
49  
50  
51  
52  
53  
54  
55  
56  
57  
58  
59  
60



Figure 4. Decision curves for >1 incident according to the OPC/nurse measure and patients/nurse measure, respectively

107x71mm (300 x 300 DPI)

iew only

1  
2  
3  
4  
5  
6  
7  
8  
9  
10  
11  
12  
13  
14  
15  
16  
17  
18  
19  
20  
21  
22  
23  
24  
25  
26  
27  
28  
29  
30  
31  
32  
33  
34  
35  
36  
37  
38  
39  
40  
41  
42  
43  
44  
45  
46  
47  
48  
49  
50  
51  
52  
53  
54  
55  
56  
57  
58  
59  
60



Figure 5. Decision curves for death according to the OPC/nurse measure and patients/nurse measure, respectively

107x71mm (300 x 300 DPI)

iew only

COMMENT körs på abo\_bjo\_vasa\_v1.sav

COMMENT utan kontrollvariabler

COMMENT läs resultaten enligt Table 1, första kolumnen, sex modeller, andra kolumnen, sex modeller, osv

COMMENT identisk med enbart-vasa-varianten

\*\*

LOGISTIC REGRESSION VARIABLES hand01

/METHOD=ENTER bv1

/CONTRAST (bv1)=Indicator(1)

/PRINT=CI(95)

/CRITERIA=PIN(0.05) POUT(0.10) ITERATE(20) CUT(0.5).

## Block 1: Method = Enter

### Omnibus Tests of Model Coefficients

|        |       | Chi-square | df | Sig. |
|--------|-------|------------|----|------|
| Step 1 | Step  | 66,122     | 2  | ,000 |
|        | Block | 66,122     | 2  | ,000 |
|        | Model | 66,122     | 2  | ,000 |

### Model Summary

| Step | -2 Log likelihood    | Cox & Snell R Square | Nagelkerke R Square |
|------|----------------------|----------------------|---------------------|
| 1    | 8557,46 <sup>a</sup> | ,005                 | ,011                |

a. Estimation terminated at iteration number 5 because parameter estimates changed by less than ,001.

Classification Table<sup>a</sup>

| Observed           |                              | Predicted                    |                     |                    |       |
|--------------------|------------------------------|------------------------------|---------------------|--------------------|-------|
|                    |                              | hand01 händelse nej eller ja |                     | Percentage Correct |       |
|                    |                              | 0 ingen händelse             | 1 minst en händelse |                    |       |
| Step 1             | hand01 händelse nej eller ja | 0 ingen händelse             | 11108               | 0                  | 100,0 |
|                    |                              | 1 minst en händelse          | 1367                | 0                  | ,0    |
| Overall Percentage |                              |                              |                     |                    | 89,0  |

a. The cut value is ,500

Variables in the Equation

|                         | B      | S.E. | Wald     | df | Sig. | Exp(B) | 95% C.I. for EXP(B) |       |
|-------------------------|--------|------|----------|----|------|--------|---------------------|-------|
|                         |        |      |          |    |      |        | Lower               | Upper |
| Step 1 <sup>a</sup> bv1 |        |      | 63,025   | 2  | ,000 |        |                     |       |
|                         | -,398  | ,079 | 25,244   | 1  | ,000 | ,671   | ,575                | ,784  |
|                         | ,244   | ,064 | 14,581   | 1  | ,000 | 1,277  | 1,126               | 1,447 |
| Constant                | -2,090 | ,044 | 2302,164 | 1  | ,000 | ,124   |                     |       |

a. Variable(s) entered on step 1: bv1.

```
LOGISTIC REGRESSION VARIABLES hand01
/METHOD=ENTER bv2
/CONTRAST (bv2)=Indicator(1)
/PRINT=CI(95)
/CRITERIA=PIN(0.05) POUT(0.10) ITERATE(20) CUT(0.5).
```

## Block 1: Method = Enter

Omnibus Tests of Model Coefficients

|        |       | Chi-square | df | Sig. |
|--------|-------|------------|----|------|
| Step 1 | Step  | 51,341     | 2  | ,000 |
|        | Block | 51,341     | 2  | ,000 |
|        | Model | 51,341     | 2  | ,000 |

**Model Summary**

| Step | -2 Log likelihood    | Cox & Snell R Square | Nagelkerke R Square |
|------|----------------------|----------------------|---------------------|
| 1    | 8572,24 <sup>a</sup> | ,004                 | ,008                |

a. Estimation terminated at iteration number 5 because parameter estimates changed by less than ,001.

**Classification Table<sup>a</sup>**

| Observed           |                              | Predicted                    |                     |                    |       |
|--------------------|------------------------------|------------------------------|---------------------|--------------------|-------|
|                    |                              | hand01 händelse nej eller ja |                     | Percentage Correct |       |
|                    |                              | 0 ingen händelse             | 1 minst en händelse |                    |       |
| Step 1             | hand01 händelse nej eller ja | 0 ingen händelse             | 11108               | 0                  | 100,0 |
|                    |                              | 1 minst en händelse          | 1367                | 0                  | ,0    |
| Overall Percentage |                              |                              |                     |                    | 89,0  |

a. The cut value is ,500

**Variables in the Equation**

|                         | B        | S.E.   | Wald   | df       | Sig. | Exp(B) | 95% C.I. for EXP(B) |       |       |
|-------------------------|----------|--------|--------|----------|------|--------|---------------------|-------|-------|
|                         |          |        |        |          |      |        | Lower               | Upper |       |
| Step 1 <sup>a</sup> bv2 |          |        | 49,589 | 2        | ,000 |        |                     |       |       |
|                         | bv2(1)   | -,313  | ,081   | 14,940   | 1    | ,000   | ,732                | ,624  | ,857  |
|                         | bv2(2)   | ,166   | ,073   | 5,185    | 1    | ,023   | 1,180               | 1,023 | 1,361 |
|                         | Constant | -2,071 | ,060   | 1188,882 | 1    | ,000   | ,126                |       |       |

a. Variable(s) entered on step 1: bv2.

```
LOGISTIC REGRESSION VARIABLES hand01
/METHOD=ENTER bv3
/CONTRAST (bv3)=Indicator(1)
/PRINT=CI(95)
/CRITERIA=PIN(0.05) POUT(0.10) ITERATE(20) CUT(0.5).
```

**Block 1: Method = Enter**

## Omnibus Tests of Model Coefficients

|        |       | Chi-square | df | Sig. |
|--------|-------|------------|----|------|
| Step 1 | Step  | 52,926     | 2  | ,000 |
|        | Block | 52,926     | 2  | ,000 |
|        | Model | 52,926     | 2  | ,000 |

## Model Summary

| Step | -2 Log likelihood    | Cox & Snell R Square | Nagelkerke R Square |
|------|----------------------|----------------------|---------------------|
| 1    | 8570,66 <sup>a</sup> | ,004                 | ,008                |

a. Estimation terminated at iteration number 5 because parameter estimates changed by less than ,001.

Classification Table<sup>a</sup>

|                    |                              | Predicted                    |                     |                    |       |
|--------------------|------------------------------|------------------------------|---------------------|--------------------|-------|
|                    |                              | hand01 händelse nej eller ja |                     | Percentage Correct |       |
| Observed           |                              | 0 ingen händelse             | 1 minst en händelse |                    |       |
| Step 1             | hand01 händelse nej eller ja | 0 ingen händelse             | 11108               | 0                  | 100,0 |
|                    |                              | 1 minst en händelse          | 1367                | 0                  | ,0    |
| Overall Percentage |                              |                              |                     |                    | 89,0  |

a. The cut value is ,500

## Variables in the Equation

|                     | B        | S.E.   | Wald   | df       | Sig. | Exp(B) | 95% C.I. for EXP(B) |       |
|---------------------|----------|--------|--------|----------|------|--------|---------------------|-------|
|                     |          |        |        |          |      |        | Lower               | Upper |
| Step 1 <sup>a</sup> |          |        |        |          |      |        |                     |       |
|                     | bv3      |        | 47,569 | 2        | ,000 |        |                     |       |
|                     | bv3(1)   | -,607  | ,111   | 30,158   | ,000 | ,545   | ,439                | ,677  |
|                     | bv3(2)   | ,255   | ,075   | 11,566   | ,001 | 1,291  | 1,114               | 1,495 |
|                     | Constant | -2,079 | ,033   | 3894,857 | ,000 | ,125   |                     |       |

a. Variable(s) entered on step 1: bv3.

LOGISTIC REGRESSION VARIABLES hand01

/METHOD=ENTER sv3

/CONTRAST (sv3)=Indicator(1)

/PRINT=CI(95)

/CRITERIA=PIN(0.05) POUT(0.10) ITERATE(20) CUT(0.5).

## Block 1: Method = Enter

### Omnibus Tests of Model Coefficients

|        |       | Chi-square | df | Sig. |
|--------|-------|------------|----|------|
| Step 1 | Step  | 34,433     | 2  | ,000 |
|        | Block | 34,433     | 2  | ,000 |
|        | Model | 34,433     | 2  | ,000 |

### Model Summary

| Step | -2 Log likelihood    | Cox & Snell R Square | Nagelkerke R Square |
|------|----------------------|----------------------|---------------------|
| 1    | 8589,15 <sup>a</sup> | ,003                 | ,006                |

a. Estimation terminated at iteration number 5 because parameter estimates changed by less than ,001.

### Classification Table<sup>a</sup>

|                    |                              | Predicted                    |                     |                    |       |
|--------------------|------------------------------|------------------------------|---------------------|--------------------|-------|
|                    |                              | hand01 händelse nej eller ja |                     | Percentage Correct |       |
| Observed           |                              | 0 ingen händelse             | 1 minst en händelse |                    |       |
| Step 1             | hand01 händelse nej eller ja | 0 ingen händelse             | 11108               | 0                  | 100,0 |
|                    |                              | 1 minst en händelse          | 1367                | 0                  | ,0    |
| Overall Percentage |                              |                              |                     |                    | 89,0  |

a. The cut value is ,500

### Variables in the Equation

|                     | B        | S.E.   | Wald   | df       | Sig. | Exp(B) | 95% C.I. for EXP(B) |       |       |
|---------------------|----------|--------|--------|----------|------|--------|---------------------|-------|-------|
|                     |          |        |        |          |      |        | Lower               | Upper |       |
| Step 1 <sup>a</sup> | sv3      |        | 33,479 | 2        | ,000 |        |                     |       |       |
|                     | sv3(1)   | -,298  | ,075   | 15,716   | 1    | ,000   | ,742                | ,640  | ,860  |
|                     | sv3(2)   | ,084   | ,071   | 1,412    | 1    | ,235   | 1,088               | ,947  | 1,251 |
|                     | Constant | -2,025 | ,055   | 1339,704 | 1    | ,000   | ,132                |       |       |

a. Variable(s) entered on step 1: sv3.

LOGISTIC REGRESSION VARIABLES hand01  
 /METHOD=ENTER sv5  
 /CONTRAST (sv5)=Indicator(1)  
 /PRINT=CI(95)  
 /CRITERIA=PIN(0.05) POUT(0.10) ITERATE(20) CUT(0.5).

## Block 1: Method = Enter

### Omnibus Tests of Model Coefficients

|        |       | Chi-square | df | Sig. |
|--------|-------|------------|----|------|
| Step 1 | Step  | 39,044     | 4  | ,000 |
|        | Block | 39,044     | 4  | ,000 |
|        | Model | 39,044     | 4  | ,000 |

### Model Summary

| Step | -2 Log likelihood    | Cox & Snell R Square | Nagelkerke R Square |
|------|----------------------|----------------------|---------------------|
| 1    | 8584,54 <sup>a</sup> | ,003                 | ,006                |

a. Estimation terminated at iteration number 5 because parameter estimates changed by less than ,001.

### Classification Table<sup>a</sup>

|                    |                              | Predicted                    |                     |                    |       |
|--------------------|------------------------------|------------------------------|---------------------|--------------------|-------|
|                    |                              | hand01 händelse nej eller ja |                     | Percentage Correct |       |
| Observed           |                              | 0 ingen händelse             | 1 minst en händelse |                    |       |
| Step 1             | hand01 händelse nej eller ja | 0 ingen händelse             | 11108               | 0                  | 100,0 |
|                    |                              | 1 minst en händelse          | 1367                | 0                  | ,0    |
| Overall Percentage |                              |                              |                     |                    | 89,0  |

a. The cut value is ,500



Variables in the Equation

|                         | B      | S.E. | Wald    | df | Sig. | Exp(B) | 95% C.I. for EXP(B) |       |
|-------------------------|--------|------|---------|----|------|--------|---------------------|-------|
|                         |        |      |         |    |      |        | Lower               | Upper |
| Step 1 <sup>a</sup> sv5 |        |      | 37,583  | 4  | ,000 |        |                     |       |
| sv5(1)                  | -,386  | ,093 | 17,124  | 1  | ,000 | ,680   | ,566                | ,816  |
| sv5(2)                  | -,122  | ,105 | 1,346   | 1  | ,246 | ,885   | ,721                | 1,088 |
| sv5(3)                  | -,035  | ,096 | ,134    | 1  | ,714 | ,965   | ,799                | 1,166 |
| sv5(4)                  | ,090   | ,090 | 1,012   | 1  | ,315 | 1,095  | ,918                | 1,306 |
| Constant                | -1,995 | ,071 | 781,526 | 1  | ,000 | ,136   |                     |       |

a. Variable(s) entered on step 1: sv5.

LOGISTIC REGRESSION VARIABLES hand01

/METHOD=ENTER sv7

/CONTRAST (sv7)=Indicator(1)

/PRINT=CI(95)

/CRITERIA=PIN(0.05) POUT(0.10) ITERATE(20) CUT(0.5).

### Block 1: Method = Enter

Omnibus Tests of Model Coefficients

|        |       | Chi-square | df | Sig. |
|--------|-------|------------|----|------|
| Step 1 | Step  | 45,807     | 6  | ,000 |
|        | Block | 45,807     | 6  | ,000 |
|        | Model | 45,807     | 6  | ,000 |

Model Summary

| Step | -2 Log likelihood    | Cox & Snell R Square | Nagelkerke R Square |
|------|----------------------|----------------------|---------------------|
| 1    | 8577,78 <sup>a</sup> | ,004                 | ,007                |

a. Estimation terminated at iteration number 5 because parameter estimates changed by less than ,001.

Classification Table<sup>a</sup>

| Observed           |                              | Predicted                    |                     |                    |       |
|--------------------|------------------------------|------------------------------|---------------------|--------------------|-------|
|                    |                              | hand01 händelse nej eller ja |                     | Percentage Correct |       |
|                    |                              | 0 ingen händelse             | 1 minst en händelse |                    |       |
| Step 1             | hand01 händelse nej eller ja | 0 ingen händelse             | 11108               | 0                  | 100,0 |
|                    |                              | 1 minst en händelse          | 1367                | 0                  | ,0    |
| Overall Percentage |                              |                              |                     |                    | 89,0  |

a. The cut value is ,500

Variables in the Equation

|                         | B        | S.E.   | Wald   | df      | Sig. | Exp(B) | 95% C.I. for EXP(B) |       |       |
|-------------------------|----------|--------|--------|---------|------|--------|---------------------|-------|-------|
|                         |          |        |        |         |      |        | Lower               | Upper |       |
| Step 1 <sup>a</sup> sv7 |          |        | 43,366 | 6       | ,000 |        |                     |       |       |
|                         | sv7(1)   | -,467  | ,105   | 19,690  | 1    | ,000   | ,627                | ,510  | ,771  |
|                         | sv7(2)   | -,157  | ,123   | 1,622   | 1    | ,203   | ,855                | ,672  | 1,088 |
|                         | sv7(3)   | -,147  | ,122   | 1,438   | 1    | ,231   | ,864                | ,680  | 1,097 |
|                         | sv7(4)   | -,057  | ,116   | ,247    | 1    | ,619   | ,944                | ,753  | 1,184 |
|                         | sv7(5)   | ,080   | ,105   | ,578    | 1    | ,447   | 1,083               | ,881  | 1,332 |
|                         | sv7(6)   | ,028   | ,104   | ,072    | 1    | ,789   | 1,028               | ,838  | 1,262 |
|                         | Constant | -1,978 | ,081   | 594,335 | 1    | ,000   | ,138                |       |       |

a. Variable(s) entered on step 1: sv7.

\*\*

```
LOGISTIC REGRESSION VARIABLES luonne1t1
/METHOD=ENTER bv1
/CONTRAST (bv1)=Indicator(1)
/PRINT=CI(95)
/CRITERIA=PIN(0.05) POUT(0.10) ITERATE(20) CUT(0.5).
```

### Block 1: Method = Enter

Omnibus Tests of Model Coefficients

|             | Chi-square | df | Sig. |
|-------------|------------|----|------|
| Step 1 Step | 27,580     | 2  | ,000 |
| Block       | 27,580     | 2  | ,000 |
| Model       | 27,580     | 2  | ,000 |

**Model Summary**

| Step | -2 Log likelihood    | Cox & Snell R Square | Nagelkerke R Square |
|------|----------------------|----------------------|---------------------|
| 1    | 6169,29 <sup>a</sup> | ,002                 | ,006                |

a. Estimation terminated at iteration number 6 because parameter estimates changed by less than ,001.

**Classification Table<sup>a</sup>**

|                    |                                                | Predicted                                                    |              |
|--------------------|------------------------------------------------|--------------------------------------------------------------|--------------|
|                    |                                                | luonnelt1 luonne highest = ...                               |              |
| Observed           |                                                | 0 ingen händelse eller läheltä piti                          |              |
| Step 1             | luonnelt1 luonne highest = tapahtui potilaalle | 0 ingen händelse eller läheltä piti<br>1 tapahtui potilaalle | 11627<br>848 |
| Overall Percentage |                                                |                                                              |              |

**Classification Table<sup>a</sup>**

|                    |                                                | Predicted                                                    |        |
|--------------------|------------------------------------------------|--------------------------------------------------------------|--------|
|                    |                                                | luonnelt1 luonne highest = ...                               |        |
| Observed           |                                                | 1 tapahtui potilaalle                                        |        |
| Step 1             | luonnelt1 luonne highest = tapahtui potilaalle | 0 ingen händelse eller läheltä piti<br>1 tapahtui potilaalle | 0<br>0 |
| Overall Percentage |                                                |                                                              |        |

Classification Table<sup>a</sup>

|                    |                                                |                                                              | Predicted          |
|--------------------|------------------------------------------------|--------------------------------------------------------------|--------------------|
|                    |                                                |                                                              |                    |
| Observed           |                                                |                                                              | Percentage Correct |
| Step 1             | luonnelt1 luonne highest = tapahtui potilaalle | 0 ingen händelse eller läheltä piti<br>1 tapahtui potilaalle | 100,0<br>,0        |
| Overall Percentage |                                                |                                                              | 93,2               |

a. The cut value is ,500

Variables in the Equation

|                         | B      | S.E. | Wald     | df | Sig. | Exp(B) | 95% C.I. for EXP(B) |       |
|-------------------------|--------|------|----------|----|------|--------|---------------------|-------|
|                         |        |      |          |    |      |        | Lower               | Upper |
| Step 1 <sup>a</sup> bv1 |        |      | 25,846   | 2  | ,000 |        |                     |       |
|                         | -,387  | ,097 | 15,866   | 1  | ,000 | ,679   | ,561                | ,822  |
|                         | ,119   | ,080 | 2,229    | 1  | ,135 | 1,126  | ,963                | 1,317 |
| Constant                | -2,571 | ,053 | 2346,429 | 1  | ,000 | ,076   |                     |       |

a. Variable(s) entered on step 1: bv1.

```
LOGISTIC REGRESSION VARIABLES luonnelt1
/METHOD=ENTER bv2
/CONTRAST (bv2)=Indicator(1)
/PRINT=CI(95)
/CRITERIA=PIN(0.05) POUT(0.10) ITERATE(20) CUT(0.5).
```

## Block 1: Method = Enter

Omnibus Tests of Model Coefficients

|        |       | Chi-square | df | Sig. |
|--------|-------|------------|----|------|
| Step 1 | Step  | 21,300     | 2  | ,000 |
|        | Block | 21,300     | 2  | ,000 |
|        | Model | 21,300     | 2  | ,000 |

**Model Summary**

| Step | -2 Log likelihood    | Cox & Snell R Square | Nagelkerke R Square |
|------|----------------------|----------------------|---------------------|
| 1    | 6175,57 <sup>a</sup> | ,002                 | ,004                |

a. Estimation terminated at iteration number 5 because parameter estimates changed by less than ,001.

**Classification Table<sup>a</sup>**

|                    |                                                | Predicted                                                    |              |
|--------------------|------------------------------------------------|--------------------------------------------------------------|--------------|
|                    |                                                | luonnelt1 luonne highest = ...                               |              |
| Observed           |                                                | 0 ingen händelse eller läheltä piti                          |              |
| Step 1             | luonnelt1 luonne highest = tapahtui potilaalle | 0 ingen händelse eller läheltä piti<br>1 tapahtui potilaalle | 11627<br>848 |
| Overall Percentage |                                                |                                                              |              |

**Classification Table<sup>a</sup>**

|                    |                                                | Predicted                                                    |        |
|--------------------|------------------------------------------------|--------------------------------------------------------------|--------|
|                    |                                                | luonnelt1 luonne highest = ...                               |        |
| Observed           |                                                | 1 tapahtui potilaalle                                        |        |
| Step 1             | luonnelt1 luonne highest = tapahtui potilaalle | 0 ingen händelse eller läheltä piti<br>1 tapahtui potilaalle | 0<br>0 |
| Overall Percentage |                                                |                                                              |        |

Classification Table<sup>a</sup>

|                    |                                                |                                                              | Predicted          |
|--------------------|------------------------------------------------|--------------------------------------------------------------|--------------------|
| Observed           |                                                |                                                              | Percentage Correct |
| Step 1             | luonnelt1 luonne highest = tapahtui potilaalle | 0 ingen händelse eller läheltä piti<br>1 tapahtui potilaalle | 100,0<br>,0        |
| Overall Percentage |                                                |                                                              | 93,2               |

a. The cut value is ,500

Variables in the Equation

|                         | B        | S.E.   | Wald   | df       | Sig. | Exp(B) | 95% C.I. for EXP(B) |            |
|-------------------------|----------|--------|--------|----------|------|--------|---------------------|------------|
|                         |          |        |        |          |      |        | Lower               | Upper      |
| Step 1 <sup>a</sup> bv2 |          |        | 20,588 | 2        | ,000 |        |                     |            |
|                         | bv2(1)   | -,282  | ,099   | 8,073    | 1    | ,004   | ,755                | ,621 ,916  |
|                         | bv2(2)   | ,096   | ,090   | 1,146    | 1    | ,284   | 1,101               | ,923 1,313 |
|                         | Constant | -2,571 | ,074   | 1215,978 | 1    | ,000   | ,076                |            |

a. Variable(s) entered on step 1: bv2.

```
LOGISTIC REGRESSION VARIABLES luonnelt1
/METHOD=ENTER bv3
/CONTRAST (bv3)=Indicator(1)
/PRINT=CI(95)
/CRITERIA=PIN(0.05) POUT(0.10) ITERATE(20) CUT(0.5).
```

## Block 1: Method = Enter

Omnibus Tests of Model Coefficients

|        |       | Chi-square | df | Sig. |
|--------|-------|------------|----|------|
| Step 1 | Step  | 21,420     | 2  | ,000 |
|        | Block | 21,420     | 2  | ,000 |
|        | Model | 21,420     | 2  | ,000 |

**Model Summary**

| Step | -2 Log likelihood    | Cox & Snell R Square | Nagelkerke R Square |
|------|----------------------|----------------------|---------------------|
| 1    | 6175,45 <sup>a</sup> | ,002                 | ,004                |

a. Estimation terminated at iteration number 6 because parameter estimates changed by less than ,001.

**Classification Table<sup>a</sup>**

|                    |                                                | Predicted                                                    |              |
|--------------------|------------------------------------------------|--------------------------------------------------------------|--------------|
|                    |                                                | luonnelt1 luonne highest = ...                               |              |
| Observed           |                                                | 0 ingen händelse eller läheltä piti                          |              |
| Step 1             | luonnelt1 luonne highest = tapahtui potilaalle | 0 ingen händelse eller läheltä piti<br>1 tapahtui potilaalle | 11627<br>848 |
| Overall Percentage |                                                |                                                              |              |

**Classification Table<sup>a</sup>**

|                    |                                                | Predicted                                                    |        |
|--------------------|------------------------------------------------|--------------------------------------------------------------|--------|
|                    |                                                | luonnelt1 luonne highest = ...                               |        |
| Observed           |                                                | 1 tapahtui potilaalle                                        |        |
| Step 1             | luonnelt1 luonne highest = tapahtui potilaalle | 0 ingen händelse eller läheltä piti<br>1 tapahtui potilaalle | 0<br>0 |
| Overall Percentage |                                                |                                                              |        |

Classification Table<sup>a</sup>

|                    |                                                |                                                              | Predicted          |
|--------------------|------------------------------------------------|--------------------------------------------------------------|--------------------|
|                    |                                                |                                                              |                    |
| Observed           |                                                |                                                              | Percentage Correct |
| Step 1             | luonnelt1 luonne highest = tapahtui potilaalle | 0 ingen händelse eller läheltä piti<br>1 tapahtui potilaalle | 100,0<br>,0        |
| Overall Percentage |                                                |                                                              | 93,2               |

a. The cut value is ,500

Variables in the Equation

|                         | B        | S.E.   | Wald   | df       | Sig. | Exp(B) | 95% C.I. for EXP(B) |       |       |
|-------------------------|----------|--------|--------|----------|------|--------|---------------------|-------|-------|
|                         |          |        |        |          |      |        | Lower               | Upper |       |
| Step 1 <sup>a</sup> bv3 |          |        | 19,526 | 2        | ,000 |        |                     |       |       |
|                         | bv3(1)   | -,481  | ,132   | 13,182   | 1    | ,000   | ,618                | ,477  | ,801  |
|                         | bv3(2)   | ,188   | ,094   | 3,996    | 1    | ,046   | 1,207               | 1,004 | 1,452 |
|                         | Constant | -2,601 | ,041   | 3967,818 | 1    | ,000   | ,074                |       |       |

a. Variable(s) entered on step 1: bv3.

```
LOGISTIC REGRESSION VARIABLES luonnelt1
/METHOD=ENTER sv3
/CONTRAST (sv3)=Indicator(1)
/PRINT=CI(95)
/CRITERIA=PIN(0.05) POUT(0.10) ITERATE(20) CUT(0.5).
```

## Block 1: Method = Enter

Omnibus Tests of Model Coefficients

|        |       | Chi-square | df | Sig. |
|--------|-------|------------|----|------|
| Step 1 | Step  | 16,005     | 2  | ,000 |
|        | Block | 16,005     | 2  | ,000 |
|        | Model | 16,005     | 2  | ,000 |



**Model Summary**

| Step | -2 Log likelihood    | Cox & Snell R Square | Nagelkerke R Square |
|------|----------------------|----------------------|---------------------|
| 1    | 6180,87 <sup>a</sup> | ,001                 | ,003                |

a. Estimation terminated at iteration number 5 because parameter estimates changed by less than ,001.

**Classification Table<sup>a</sup>**

|                    |                                                | Predicted                                                    |              |
|--------------------|------------------------------------------------|--------------------------------------------------------------|--------------|
|                    |                                                | luonnelt1 luonne highest = ...                               |              |
| Observed           |                                                | 0 ingen händelse eller läheltä piti                          |              |
| Step 1             | luonnelt1 luonne highest = tapahtui potilaalle | 0 ingen händelse eller läheltä piti<br>1 tapahtui potilaalle | 11627<br>848 |
| Overall Percentage |                                                |                                                              |              |

**Classification Table<sup>a</sup>**

|                    |                                                | Predicted                                                    |        |
|--------------------|------------------------------------------------|--------------------------------------------------------------|--------|
|                    |                                                | luonnelt1 luonne highest = ...                               |        |
| Observed           |                                                | 1 tapahtui potilaalle                                        |        |
| Step 1             | luonnelt1 luonne highest = tapahtui potilaalle | 0 ingen händelse eller läheltä piti<br>1 tapahtui potilaalle | 0<br>0 |
| Overall Percentage |                                                |                                                              |        |

Classification Table<sup>a</sup>

|                    |                                                |                                                              | Predicted          |
|--------------------|------------------------------------------------|--------------------------------------------------------------|--------------------|
|                    |                                                |                                                              |                    |
| Observed           |                                                |                                                              | Percentage Correct |
| Step 1             | luonnelt1 luonne highest = tapahtui potilaalle | 0 ingen händelse eller läheltä piti<br>1 tapahtui potilaalle | 100,0<br>,0        |
| Overall Percentage |                                                |                                                              | 93,2               |

a. The cut value is ,500

Variables in the Equation

|                         | B      | S.E. | Wald     | df | Sig. | Exp(B) | 95% C.I. for EXP(B) |       |
|-------------------------|--------|------|----------|----|------|--------|---------------------|-------|
|                         |        |      |          |    |      |        | Lower               | Upper |
| Step 1 <sup>a</sup> sv3 |        |      | 15,909   | 2  | ,000 |        |                     |       |
| sv3(1)                  | -,164  | ,094 | 3,014    | 1  | ,083 | ,849   | ,706                | 1,021 |
| sv3(2)                  | ,167   | ,090 | 3,463    | 1  | ,063 | 1,181  | ,991                | 1,408 |
| Constant                | -2,626 | ,071 | 1376,464 | 1  | ,000 | ,072   |                     |       |

a. Variable(s) entered on step 1: sv3.

```
LOGISTIC REGRESSION VARIABLES luonnelt1
/METHOD=ENTER sv5
/CONTRAST (sv5)=Indicator(1)
/PRINT=CI(95)
/CRITERIA=PIN(0.05) POUT(0.10) ITERATE(20) CUT(0.5).
```

## Block 1: Method = Enter

Omnibus Tests of Model Coefficients

|        |       | Chi-square | df | Sig. |
|--------|-------|------------|----|------|
| Step 1 | Step  | 15,434     | 4  | ,004 |
|        | Block | 15,434     | 4  | ,004 |
|        | Model | 15,434     | 4  | ,004 |

**Model Summary**

| Step | -2 Log likelihood    | Cox & Snell R Square | Nagelkerke R Square |
|------|----------------------|----------------------|---------------------|
| 1    | 6181,44 <sup>a</sup> | ,001                 | ,003                |

a. Estimation terminated at iteration number 5 because parameter estimates changed by less than ,001.

**Classification Table<sup>a</sup>**

|                    |                                                |                                                              | Predicted                                    |
|--------------------|------------------------------------------------|--------------------------------------------------------------|----------------------------------------------|
|                    |                                                |                                                              | luonnelt1<br>luonne<br>highest = ...         |
| Observed           |                                                |                                                              | 0 ingen<br>händelse<br>eller läheltä<br>piti |
| Step 1             | luonnelt1 luonne highest = tapahtui potilaalle | 0 ingen händelse eller läheltä piti<br>1 tapahtui potilaalle | 11627<br>848                                 |
| Overall Percentage |                                                |                                                              |                                              |

**Classification Table<sup>a</sup>**

|                    |                                                |                                                              | Predicted                            |
|--------------------|------------------------------------------------|--------------------------------------------------------------|--------------------------------------|
|                    |                                                |                                                              | luonnelt1<br>luonne<br>highest = ... |
| Observed           |                                                |                                                              | 1 tapahtui<br>potilaalle             |
| Step 1             | luonnelt1 luonne highest = tapahtui potilaalle | 0 ingen händelse eller läheltä piti<br>1 tapahtui potilaalle | 0<br>0                               |
| Overall Percentage |                                                |                                                              |                                      |

Classification Table<sup>a</sup>

|                    |                                                |                                                              | Predicted          |
|--------------------|------------------------------------------------|--------------------------------------------------------------|--------------------|
| Observed           |                                                |                                                              | Percentage Correct |
| Step 1             | luonnelt1 luonne highest = tapahtui potilaalle | 0 ingen händelse eller läheltä piti<br>1 tapahtui potilaalle | 100,0<br>,0        |
| Overall Percentage |                                                |                                                              | 93,2               |

a. The cut value is ,500

Variables in the Equation

|                     |          | B      | S.E. | Wald    | df | Sig. | Exp(B) | 95% C.I. for EXP(B) |       |
|---------------------|----------|--------|------|---------|----|------|--------|---------------------|-------|
|                     |          |        |      |         |    |      |        | Lower               | Upper |
| Step 1 <sup>a</sup> | sv5      |        |      | 15,236  | 4  | ,004 |        |                     |       |
|                     | sv5(1)   | -,215  | ,117 | 3,419   | 1  | ,064 | ,806   | ,642                | 1,013 |
|                     | sv5(2)   | -,099  | ,134 | ,551    | 1  | ,458 | ,905   | ,696                | 1,177 |
|                     | sv5(3)   | ,064   | ,121 | ,280    | 1  | ,597 | 1,066  | ,841                | 1,351 |
|                     | sv5(4)   | ,149   | ,114 | 1,719   | 1  | ,190 | 1,161  | ,929                | 1,451 |
|                     | Constant | -2,598 | ,091 | 810,642 | 1  | ,000 | ,074   |                     |       |

a. Variable(s) entered on step 1: sv5.

LOGISTIC REGRESSION VARIABLES luonnelt1

/METHOD=ENTER sv7

/CONTRAST (sv7)=Indicator(1)

/PRINT=CI(95)

/CRITERIA=PIN(0.05) POUT(0.10) ITERATE(20) CUT(0.5).

## Block 1: Method = Enter

Omnibus Tests of Model Coefficients

|        |       | Chi-square | df | Sig. |
|--------|-------|------------|----|------|
| Step 1 | Step  | 19,604     | 6  | ,003 |
|        | Block | 19,604     | 6  | ,003 |
|        | Model | 19,604     | 6  | ,003 |

**Model Summary**

| Step | -2 Log likelihood    | Cox & Snell R Square | Nagelkerke R Square |
|------|----------------------|----------------------|---------------------|
| 1    | 6177,27 <sup>a</sup> | ,002                 | ,004                |

a. Estimation terminated at iteration number 5 because parameter estimates changed by less than ,001.

**Classification Table<sup>a</sup>**

|                    |                                                | Predicted                                                    |              |
|--------------------|------------------------------------------------|--------------------------------------------------------------|--------------|
|                    |                                                | luonnelt1 luonne highest = ...                               |              |
| Observed           |                                                | 0 ingen händelse eller läheltä piti                          |              |
| Step 1             | luonnelt1 luonne highest = tapahtui potilaalle | 0 ingen händelse eller läheltä piti<br>1 tapahtui potilaalle | 11627<br>848 |
| Overall Percentage |                                                |                                                              |              |

**Classification Table<sup>a</sup>**

|                    |                                                | Predicted                                                    |        |
|--------------------|------------------------------------------------|--------------------------------------------------------------|--------|
|                    |                                                | luonnelt1 luonne highest = ...                               |        |
| Observed           |                                                | 1 tapahtui potilaalle                                        |        |
| Step 1             | luonnelt1 luonne highest = tapahtui potilaalle | 0 ingen händelse eller läheltä piti<br>1 tapahtui potilaalle | 0<br>0 |
| Overall Percentage |                                                |                                                              |        |

Classification Table<sup>a</sup>

|                    |                                                |                                                              | Predicted          |
|--------------------|------------------------------------------------|--------------------------------------------------------------|--------------------|
| Observed           |                                                |                                                              | Percentage Correct |
| Step 1             | luonnelt1 luonne highest = tapahtui potilaalle | 0 ingen händelse eller läheltä piti<br>1 tapahtui potilaalle | 100,0<br>,0        |
| Overall Percentage |                                                |                                                              | 93,2               |

a. The cut value is ,500

Variables in the Equation

|                     |          | B      | S.E. | Wald    | df | Sig. | Exp(B) | 95% C.I. for EXP(B) |       |
|---------------------|----------|--------|------|---------|----|------|--------|---------------------|-------|
|                     |          |        |      |         |    |      |        | Lower               | Upper |
| Step 1 <sup>a</sup> | sv7      |        |      | 19,036  | 6  | ,004 |        |                     |       |
|                     | sv7(1)   | -,344  | ,130 | 7,051   | 1  | ,008 | ,709   | ,550                | ,914  |
|                     | sv7(2)   | -,170  | ,155 | 1,200   | 1  | ,273 | ,844   | ,623                | 1,143 |
|                     | sv7(3)   | -,157  | ,154 | 1,044   | 1  | ,307 | ,855   | ,632                | 1,155 |
|                     | sv7(4)   | -,037  | ,144 | ,067    | 1  | ,796 | ,963   | ,727                | 1,278 |
|                     | sv7(5)   | ,096   | ,131 | ,531    | 1  | ,466 | 1,100  | ,851                | 1,423 |
|                     | sv7(6)   | ,037   | ,130 | ,080    | 1  | ,777 | 1,038  | ,804                | 1,339 |
|                     | Constant | -2,530 | ,101 | 622,458 | 1  | ,000 | ,080   |                     |       |

a. Variable(s) entered on step 1: sv7.

\*\*

```
LOGISTIC REGRESSION VARIABLES seurauslt3
/METHOD=ENTER bv1
/CONTRAST (bv1)=Indicator(1)
/PRINT=CI(95)
/CRITERIA=PIN(0.05) POUT(0.10) ITERATE(20) CUT(0.5).
```

### Block 1: Method = Enter

## Omnibus Tests of Model Coefficients

|        |       | Chi-square | df | Sig. |
|--------|-------|------------|----|------|
| Step 1 | Step  | 16,012     | 2  | ,000 |
|        | Block | 16,012     | 2  | ,000 |
|        | Model | 16,012     | 2  | ,000 |

## Model Summary

| Step | -2 Log likelihood    | Cox & Snell R Square | Nagelkerke R Square |
|------|----------------------|----------------------|---------------------|
| 1    | 3523,04 <sup>a</sup> | ,001                 | ,005                |

a. Estimation terminated at iteration number 6 because parameter estimates changed by less than ,001.

Classification Table<sup>a</sup>

|                    |                                                    | Predicted                                                    |                                   |
|--------------------|----------------------------------------------------|--------------------------------------------------------------|-----------------------------------|
|                    |                                                    | seurauslt3 seuraus highest = ...                             | 0 ingen händelse eller ei haittaa |
|                    | Observed                                           |                                                              |                                   |
| Step 1             | seurauslt3 seuraus highest = haitta (i någon form) | 0 ingen händelse eller ei haittaa<br>1 haitta (i någon form) | 12075<br>400                      |
| Overall Percentage |                                                    |                                                              |                                   |

Classification Table<sup>a</sup>

|                    |                                                    | Predicted                                                    |                         |
|--------------------|----------------------------------------------------|--------------------------------------------------------------|-------------------------|
|                    |                                                    | seurauslt3 seuraus highest = ...                             | 1 haitta (i någon form) |
|                    | Observed                                           |                                                              |                         |
| Step 1             | seurauslt3 seuraus highest = haitta (i någon form) | 0 ingen händelse eller ei haittaa<br>1 haitta (i någon form) | 0<br>0                  |
| Overall Percentage |                                                    |                                                              |                         |

Classification Table<sup>a</sup>

|                    |                                                    | Predicted                                                    |
|--------------------|----------------------------------------------------|--------------------------------------------------------------|
| Observed           |                                                    | Percentage Correct                                           |
| Step 1             | seurauslt3 seuraus highest = haitta (i någon form) | 0 ingen händelse eller ei haittaa<br>1 haitta (i någon form) |
| Overall Percentage |                                                    | 100,0<br>,0<br>96,8                                          |

a. The cut value is ,500

Variables in the Equation

|                     | B      | S.E. | Wald     | df | Sig. | Exp(B) | 95% C.I. for EXP(B) |       |
|---------------------|--------|------|----------|----|------|--------|---------------------|-------|
|                     |        |      |          |    |      |        | Lower               | Upper |
| Step 1 <sup>a</sup> |        |      |          |    |      |        |                     |       |
| bv1                 |        |      | 14,905   | 2  | ,001 |        |                     |       |
| bv1(1)              | -,409  | ,141 | 8,381    | 1  | ,004 | ,664   | ,503                | ,876  |
| bv1(2)              | ,151   | ,113 | 1,778    | 1  | ,182 | 1,163  | ,932                | 1,451 |
| Constant            | -3,369 | ,076 | 1964,339 | 1  | ,000 | ,034   |                     |       |

a. Variable(s) entered on step 1: bv1.

```
LOGISTIC REGRESSION VARIABLES seurauslt3
/METHOD=ENTER bv2
/CONTRAST (bv2)=Indicator(1)
/PRINT=CI(95)
/CRITERIA=PIN(0.05) POUT(0.10) ITERATE(20) CUT(0.5).
```

## Block 1: Method = Enter

Omnibus Tests of Model Coefficients

|        |       | Chi-square | df | Sig. |
|--------|-------|------------|----|------|
| Step 1 | Step  | 10,152     | 2  | ,006 |
|        | Block | 10,152     | 2  | ,006 |
|        | Model | 10,152     | 2  | ,006 |



**Model Summary**

| Step | -2 Log likelihood    | Cox & Snell R Square | Nagelkerke R Square |
|------|----------------------|----------------------|---------------------|
| 1    | 3528,90 <sup>a</sup> | ,001                 | ,003                |

a. Estimation terminated at iteration number 6 because parameter estimates changed by less than ,001.

**Classification Table<sup>a</sup>**

|                    |                                                    | Predicted<br>seurauslt3<br>seuraus<br>highest = ... |
|--------------------|----------------------------------------------------|-----------------------------------------------------|
| Observed           |                                                    | 0 ingen<br>händelse<br>eller ei<br>haittaa          |
| Step 1             | seurauslt3 seuraus highest = haitta (i någon form) | 12075<br>400                                        |
| Overall Percentage |                                                    |                                                     |

**Classification Table<sup>a</sup>**

|                    |                                                    | Predicted<br>seurauslt3<br>seuraus<br>highest = ... |
|--------------------|----------------------------------------------------|-----------------------------------------------------|
| Observed           |                                                    | 1 haitta (i någon form)                             |
| Step 1             | seurauslt3 seuraus highest = haitta (i någon form) | 0<br>0                                              |
| Overall Percentage |                                                    |                                                     |

**Classification Table<sup>a</sup>**

|                    |                                                    | Predicted          |
|--------------------|----------------------------------------------------|--------------------|
| Observed           |                                                    | Percentage Correct |
| Step 1             | seurauslt3 seuraus highest = haitta (i någon form) | 100,0<br>,0        |
| Overall Percentage |                                                    | 96,8               |

a. The cut value is ,500

**Variables in the Equation**

|                         | B      | S.E. | Wald    | df | Sig. | Exp(B) | 95% C.I. for EXP(B) |       |
|-------------------------|--------|------|---------|----|------|--------|---------------------|-------|
|                         |        |      |         |    |      |        | Lower               | Upper |
| Step 1 <sup>a</sup> bv2 |        |      | 9,953   | 2  | ,007 |        |                     |       |
| bv2(1)                  | -,199  | ,144 | 1,911   | 1  | ,167 | ,820   | ,619                | 1,087 |
| bv2(2)                  | ,176   | ,130 | 1,813   | 1  | ,178 | 1,192  | ,923                | 1,539 |
| Constant                | -3,424 | ,108 | 998,936 | 1  | ,000 | ,033   |                     |       |

a. Variable(s) entered on step 1: bv2.

```
LOGISTIC REGRESSION VARIABLES seurauslt3
/METHOD=ENTER bv3
/CONTRAST (bv3)=Indicator(1)
/PRINT=CI(95)
/CRITERIA=PIN(0.05) POUT(0.10) ITERATE(20) CUT(0.5).
```

### Block 1: Method = Enter

**Omnibus Tests of Model Coefficients**

|        |       | Chi-square | df | Sig. |
|--------|-------|------------|----|------|
| Step 1 | Step  | 7,005      | 2  | ,030 |
|        | Block | 7,005      | 2  | ,030 |
|        | Model | 7,005      | 2  | ,030 |

**Model Summary**

| Step | -2 Log likelihood    | Cox & Snell R Square | Nagelkerke R Square |
|------|----------------------|----------------------|---------------------|
| 1    | 3532,04 <sup>a</sup> | ,001                 | ,002                |

a. Estimation terminated at iteration number 6 because parameter estimates changed by less than ,001.

Classification Table<sup>a</sup>

| Observed           |                                                    | Predicted                                                    |                                            |
|--------------------|----------------------------------------------------|--------------------------------------------------------------|--------------------------------------------|
|                    |                                                    | seurauslt3<br>seuraus<br>highest = ...                       | 0 ingen<br>händelse<br>eller ei<br>haittaa |
| Step 1             | seurauslt3 seuraus highest = haitta (i någon form) | 0 ingen händelse eller ei haittaa<br>1 haitta (i någon form) | 12075<br>400                               |
| Overall Percentage |                                                    |                                                              |                                            |

Classification Table<sup>a</sup>

| Observed           |                                                    | Predicted                                                    |                               |
|--------------------|----------------------------------------------------|--------------------------------------------------------------|-------------------------------|
|                    |                                                    | seurauslt3<br>seuraus<br>highest = ...                       | 1 haitta (i<br>någon<br>form) |
| Step 1             | seurauslt3 seuraus highest = haitta (i någon form) | 0 ingen händelse eller ei haittaa<br>1 haitta (i någon form) | 0<br>0                        |
| Overall Percentage |                                                    |                                                              |                               |

Classification Table<sup>a</sup>

| Observed           |                                                    | Predicted             |  |
|--------------------|----------------------------------------------------|-----------------------|--|
|                    |                                                    | Percentage<br>Correct |  |
| Step 1             | seurauslt3 seuraus highest = haitta (i någon form) | 100,0<br>,0           |  |
| Overall Percentage |                                                    | 96,8                  |  |

a. The cut value is ,500

## Variables in the Equation

|                         | B      | S.E. | Wald     | df | Sig. | Exp(B) | 95% C.I. for EXP(B) |       |
|-------------------------|--------|------|----------|----|------|--------|---------------------|-------|
|                         |        |      |          |    |      |        | Lower               | Upper |
| Step 1 <sup>a</sup> bv3 |        |      | 6,364    | 2  | ,042 |        |                     |       |
| bv3(1)                  | -,413  | ,186 | 4,960    | 1  | ,026 | ,661   | ,460                | ,952  |
| bv3(2)                  | ,119   | ,137 | ,758     | 1  | ,384 | 1,127  | ,862                | 1,473 |
| Constant                | -3,385 | ,059 | 3312,839 | 1  | ,000 | ,034   |                     |       |

a. Variable(s) entered on step 1: bv3.

```
LOGISTIC REGRESSION VARIABLES seurauslt3
/METHOD=ENTER sv3
/CONTRAST (sv3)=Indicator(1)
/PRINT=CI(95)
/CRITERIA=PIN(0.05) POUT(0.10) ITERATE(20) CUT(0.5).
```

## Block 1: Method = Enter

## Omnibus Tests of Model Coefficients

|        |       | Chi-square | df | Sig. |
|--------|-------|------------|----|------|
| Step 1 | Step  | 13,919     | 2  | ,001 |
|        | Block | 13,919     | 2  | ,001 |
|        | Model | 13,919     | 2  | ,001 |

## Model Summary

| Step | -2 Log likelihood    | Cox & Snell R Square | Nagelkerke R Square |
|------|----------------------|----------------------|---------------------|
| 1    | 3525,13 <sup>a</sup> | ,001                 | ,005                |

a. Estimation terminated at iteration number 6 because parameter estimates changed by less than ,001.

Classification Table<sup>a</sup>

| Observed           |                                                     | Predicted                                                     |                                   |
|--------------------|-----------------------------------------------------|---------------------------------------------------------------|-----------------------------------|
|                    |                                                     | seurauslt3 seuraus highest = ...                              | 0 ingen händelse eller ei haittaa |
| Step 1             | seurauslt3 seuraus highest = haittaa (i någon form) | 0 ingen händelse eller ei haittaa<br>1 haittaa (i någon form) | 12075<br>400                      |
| Overall Percentage |                                                     |                                                               |                                   |

Classification Table<sup>a</sup>

| Observed           |                                                     | Predicted                                                     |                          |
|--------------------|-----------------------------------------------------|---------------------------------------------------------------|--------------------------|
|                    |                                                     | seurauslt3 seuraus highest = ...                              | 1 haittaa (i någon form) |
| Step 1             | seurauslt3 seuraus highest = haittaa (i någon form) | 0 ingen händelse eller ei haittaa<br>1 haittaa (i någon form) | 0<br>0                   |
| Overall Percentage |                                                     |                                                               |                          |

Classification Table<sup>a</sup>

| Observed           |                                                     | Predicted                                                     |             |
|--------------------|-----------------------------------------------------|---------------------------------------------------------------|-------------|
|                    |                                                     | Percentage Correct                                            |             |
| Step 1             | seurauslt3 seuraus highest = haittaa (i någon form) | 0 ingen händelse eller ei haittaa<br>1 haittaa (i någon form) | 100,0<br>,0 |
| Overall Percentage |                                                     |                                                               | 96,8        |

a. The cut value is ,500

## Variables in the Equation

|                         | B      | S.E. | Wald     | df | Sig. | Exp(B) | 95% C.I. for EXP(B) |       |
|-------------------------|--------|------|----------|----|------|--------|---------------------|-------|
|                         |        |      |          |    |      |        | Lower               | Upper |
| Step 1 <sup>a</sup> sv3 |        |      | 13,710   | 2  | ,001 |        |                     |       |
| sv3(1)                  | -,231  | ,137 | 2,848    | 1  | ,091 | ,794   | ,607                | 1,038 |
| sv3(2)                  | ,211   | ,127 | 2,784    | 1  | ,095 | 1,235  | ,964                | 1,583 |
| Constant                | -3,415 | ,101 | 1140,138 | 1  | ,000 | ,033   |                     |       |

a. Variable(s) entered on step 1: sv3.

```
LOGISTIC REGRESSION VARIABLES seurauslt3
/METHOD=ENTER sv5
/CONTRAST (sv5)=Indicator(1)
/PRINT=CI(95)
/CRITERIA=PIN(0.05) POUT(0.10) ITERATE(20) CUT(0.5).
```

## Block 1: Method = Enter

## Omnibus Tests of Model Coefficients

|             | Chi-square | df | Sig. |
|-------------|------------|----|------|
| Step 1 Step | 17,212     | 4  | ,002 |
| Block       | 17,212     | 4  | ,002 |
| Model       | 17,212     | 4  | ,002 |

## Model Summary

| Step | -2 Log likelihood    | Cox & Snell R Square | Nagelkerke R Square |
|------|----------------------|----------------------|---------------------|
| 1    | 3521,84 <sup>a</sup> | ,001                 | ,006                |

a. Estimation terminated at iteration number 6 because parameter estimates changed by less than ,001.

Classification Table<sup>a</sup>

| Observed           |                                   | Predicted                        |
|--------------------|-----------------------------------|----------------------------------|
|                    |                                   | seurauslt3 seuraus highest = ... |
|                    | 0 ingen händelse eller ei haittaa | 12075                            |
|                    | 1 haittaa (i någon form)          | 400                              |
| Overall Percentage |                                   |                                  |

Classification Table<sup>a</sup>

| Observed           |                                   | Predicted                        |
|--------------------|-----------------------------------|----------------------------------|
|                    |                                   | seurauslt3 seuraus highest = ... |
|                    | 1 haittaa (i någon form)          |                                  |
|                    | 0 ingen händelse eller ei haittaa | 0                                |
|                    | 1 haittaa (i någon form)          | 0                                |
| Overall Percentage |                                   |                                  |

Classification Table<sup>a</sup>

| Observed           |                                   | Predicted          |
|--------------------|-----------------------------------|--------------------|
|                    |                                   | Percentage Correct |
|                    | 0 ingen händelse eller ei haittaa | 100,0              |
|                    | 1 haittaa (i någon form)          | ,0                 |
| Overall Percentage |                                   | 96,8               |

a. The cut value is ,500

## Variables in the Equation

|                         | B      | S.E. | Wald    | df | Sig. | Exp(B) | 95% C.I. for EXP(B) |       |
|-------------------------|--------|------|---------|----|------|--------|---------------------|-------|
|                         |        |      |         |    |      |        | Lower               | Upper |
| Step 1 <sup>a</sup> sv5 |        |      | 17,247  | 4  | ,002 |        |                     |       |
| sv5(1)                  | -,140  | ,173 | ,654    | 1  | ,419 | ,870   | ,620                | 1,220 |
| sv5(2)                  | -,147  | ,204 | ,522    | 1  | ,470 | ,863   | ,579                | 1,287 |
| sv5(3)                  | ,220   | ,176 | 1,566   | 1  | ,211 | 1,246  | ,883                | 1,759 |
| sv5(4)                  | ,356   | ,165 | 4,649   | 1  | ,031 | 1,427  | 1,033               | 1,972 |
| Constant                | -3,493 | ,137 | 651,114 | 1  | ,000 | ,030   |                     |       |

a. Variable(s) entered on step 1: sv5.

LOGISTIC REGRESSION VARIABLES seurauslt3

/METHOD=ENTER sv7

/CONTRAST (sv7)=Indicator(1)

/PRINT=CI(95)

/CRITERIA=PIN(0.05) POUT(0.10) ITERATE(20) CUT(0.5).

## Block 1: Method = Enter

## Omnibus Tests of Model Coefficients

|        |       | Chi-square | df | Sig. |
|--------|-------|------------|----|------|
| Step 1 | Step  | 16,401     | 6  | ,012 |
|        | Block | 16,401     | 6  | ,012 |
|        | Model | 16,401     | 6  | ,012 |

## Model Summary

| Step | -2 Log likelihood    | Cox & Snell R Square | Nagelkerke R Square |
|------|----------------------|----------------------|---------------------|
| 1    | 3522,65 <sup>a</sup> | ,001                 | ,005                |

a. Estimation terminated at iteration number 6 because parameter estimates changed by less than ,001.



Classification Table<sup>a</sup>

| Observed           |                                                    | Predicted                                                    |                                            |
|--------------------|----------------------------------------------------|--------------------------------------------------------------|--------------------------------------------|
|                    |                                                    | seurauslt3<br>seuraus<br>highest = ...                       | 0 ingen<br>händelse<br>eller ei<br>haittaa |
| Step 1             | seurauslt3 seuraus highest = haitta (i någon form) | 0 ingen händelse eller ei haittaa<br>1 haitta (i någon form) | 12075<br>400                               |
| Overall Percentage |                                                    |                                                              |                                            |

Classification Table<sup>a</sup>

| Observed           |                                                    | Predicted                                                    |                               |
|--------------------|----------------------------------------------------|--------------------------------------------------------------|-------------------------------|
|                    |                                                    | seurauslt3<br>seuraus<br>highest = ...                       | 1 haitta (i<br>någon<br>form) |
| Step 1             | seurauslt3 seuraus highest = haitta (i någon form) | 0 ingen händelse eller ei haittaa<br>1 haitta (i någon form) | 0<br>0                        |
| Overall Percentage |                                                    |                                                              |                               |

Classification Table<sup>a</sup>

| Observed           |                                                    | Predicted                                                    |             |
|--------------------|----------------------------------------------------|--------------------------------------------------------------|-------------|
|                    |                                                    | Percentage Correct                                           |             |
| Step 1             | seurauslt3 seuraus highest = haitta (i någon form) | 0 ingen händelse eller ei haittaa<br>1 haitta (i någon form) | 100,0<br>,0 |
| Overall Percentage |                                                    |                                                              | 96,8        |

a. The cut value is ,500

## Variables in the Equation

|                         | B      | S.E. | Wald    | df | Sig. | Exp(B) | 95% C.I. for EXP(B) |       |
|-------------------------|--------|------|---------|----|------|--------|---------------------|-------|
|                         |        |      |         |    |      |        | Lower               | Upper |
| Step 1 <sup>a</sup> sv7 |        |      | 15,922  | 6  | ,014 |        |                     |       |
| sv7(1)                  | -,289  | ,191 | 2,297   | 1  | ,130 | ,749   | ,516                | 1,088 |
| sv7(2)                  | -,297  | ,238 | 1,553   | 1  | ,213 | ,743   | ,466                | 1,185 |
| sv7(3)                  | -,095  | ,224 | ,179    | 1  | ,672 | ,909   | ,586                | 1,411 |
| sv7(4)                  | ,131   | ,205 | ,407    | 1  | ,524 | 1,140  | ,763                | 1,704 |
| sv7(5)                  | ,181   | ,191 | ,904    | 1  | ,342 | 1,199  | ,825                | 1,742 |
| sv7(6)                  | ,216   | ,186 | 1,345   | 1  | ,246 | 1,241  | ,861                | 1,788 |
| Constant                | -3,399 | ,150 | 514,274 | 1  | ,000 | ,033   |                     |       |

a. Variable(s) entered on step 1: sv7.

\*\*

```
LOGISTIC REGRESSION VARIABLES handlt1
/METHOD=ENTER bv1
/CONTRAST (bv1)=Indicator(1)
/PRINT=CI(95)
/CRITERIA=PIN(0.05) POUT(0.10) ITERATE(20) CUT(0.5).
```

## Block 1: Method = Enter

## Omnibus Tests of Model Coefficients

|        |       | Chi-square | df | Sig. |
|--------|-------|------------|----|------|
| Step 1 | Step  | 12,400     | 2  | ,002 |
|        | Block | 12,400     | 2  | ,002 |
|        | Model | 12,400     | 2  | ,002 |

## Model Summary

| Step | -2 Log likelihood    | Cox & Snell R Square | Nagelkerke R Square |
|------|----------------------|----------------------|---------------------|
| 1    | 2406,38 <sup>a</sup> | ,001                 | ,006                |

a. Estimation terminated at iteration number 7 because parameter estimates changed by less than ,001.

Classification Table<sup>a</sup>

|                    |                                | Predicted                      |                      |
|--------------------|--------------------------------|--------------------------------|----------------------|
|                    |                                | handlt1 händelse larger than 1 |                      |
| Observed           |                                | 0 ingen eller en händelse      | 1 mer än en händelse |
| Step 1             | handlt1 händelse larger than 1 | 0 ingen eller en händelse      | 12229                |
|                    |                                | 1 mer än en händelse           | 246                  |
| Overall Percentage |                                |                                |                      |

Classification Table<sup>a</sup>

|                    |                                | Predicted                 |       |
|--------------------|--------------------------------|---------------------------|-------|
|                    |                                | Percentage Correct        |       |
| Observed           |                                |                           |       |
| Step 1             | handlt1 händelse larger than 1 | 0 ingen eller en händelse | 100,0 |
|                    |                                | 1 mer än en händelse      | ,0    |
| Overall Percentage |                                |                           | 98,0  |

a. The cut value is ,500

Variables in the Equation

|                         | B      | S.E. | Wald     | df | Sig. | Exp(B) | 95% C.I. for EXP(B) |       |
|-------------------------|--------|------|----------|----|------|--------|---------------------|-------|
|                         |        |      |          |    |      |        | Lower               | Upper |
| Step 1 <sup>a</sup> bv1 |        |      | 11,665   | 2  | ,003 |        |                     |       |
|                         | -,406  | ,182 | 4,969    | 1  | ,026 | ,667   | ,467                | ,952  |
|                         | ,225   | ,142 | 2,508    | 1  | ,113 | 1,253  | ,948                | 1,655 |
| Constant                | -3,898 | ,098 | 1593,079 | 1  | ,000 | ,020   |                     |       |

a. Variable(s) entered on step 1: bv1.

```
LOGISTIC REGRESSION VARIABLES handlt1
/METHOD=ENTER bv2
/CONTRAST (bv2)=Indicator(1)
/PRINT=CI(95)
/CRITERIA=PIN(0.05) POUT(0.10) ITERATE(20) CUT(0.5).
```

### Block 1: Method = Enter

**Omnibus Tests of Model Coefficients**

|        |       | Chi-square | df | Sig. |
|--------|-------|------------|----|------|
| Step 1 | Step  | 9,470      | 2  | ,009 |
|        | Block | 9,470      | 2  | ,009 |
|        | Model | 9,470      | 2  | ,009 |

**Model Summary**

| Step | -2 Log likelihood    | Cox & Snell R Square | Nagelkerke R Square |
|------|----------------------|----------------------|---------------------|
| 1    | 2409,31 <sup>a</sup> | ,001                 | ,004                |

a. Estimation terminated at iteration number 7 because parameter estimates changed by less than ,001.

**Classification Table<sup>a</sup>**

| Observed           |                                |                           | Predicted                 |                      |
|--------------------|--------------------------------|---------------------------|---------------------------|----------------------|
|                    |                                |                           | 0 ingen eller en händelse | 1 mer än en händelse |
| Step 1             | handlt1 händelse larger than 1 | 0 ingen eller en händelse | 12229                     | 0                    |
|                    |                                | 1 mer än en händelse      | 246                       | 0                    |
| Overall Percentage |                                |                           |                           |                      |

**Classification Table<sup>a</sup>**

| Observed           |                                |                           | Predicted          |
|--------------------|--------------------------------|---------------------------|--------------------|
|                    |                                |                           | Percentage Correct |
| Step 1             | handlt1 händelse larger than 1 | 0 ingen eller en händelse | 100,0              |
|                    |                                | 1 mer än en händelse      | ,0                 |
| Overall Percentage |                                |                           | 98,0               |

a. The cut value is ,500

## Variables in the Equation

|                         | B      | S.E. | Wald    | df | Sig. | Exp(B) | 95% C.I. for EXP(B) |       |
|-------------------------|--------|------|---------|----|------|--------|---------------------|-------|
|                         |        |      |         |    |      |        | Lower               | Upper |
| Step 1 <sup>a</sup> bv2 |        |      | 9,094   | 2  | ,011 |        |                     |       |
| bv2(1)                  | -,302  | ,183 | 2,706   | 1  | ,100 | ,740   | ,516                | 1,059 |
| bv2(2)                  | ,162   | ,163 | ,993    | 1  | ,319 | 1,176  | ,855                | 1,618 |
| Constant                | -3,887 | ,135 | 829,283 | 1  | ,000 | ,020   |                     |       |

a. Variable(s) entered on step 1: bv2.

```
LOGISTIC REGRESSION VARIABLES handlt1
/METHOD=ENTER bv3
/CONTRAST (bv3)=Indicator(1)
/PRINT=CI(95)
/CRITERIA=PIN(0.05) POUT(0.10) ITERATE(20) CUT(0.5).
```

**Block 1: Method = Enter**

## Omnibus Tests of Model Coefficients

|             | Chi-square | df | Sig. |
|-------------|------------|----|------|
| Step 1 Step | 6,089      | 2  | ,048 |
| Block       | 6,089      | 2  | ,048 |
| Model       | 6,089      | 2  | ,048 |

## Model Summary

| Step | -2 Log likelihood    | Cox & Snell R Square | Nagelkerke R Square |
|------|----------------------|----------------------|---------------------|
| 1    | 2412,69 <sup>a</sup> | ,000                 | ,003                |

a. Estimation terminated at iteration number 7 because parameter estimates changed by less than ,001.

Classification Table<sup>a</sup>

| Observed           |                                | Predicted                      |                      |
|--------------------|--------------------------------|--------------------------------|----------------------|
|                    |                                | handlt1 händelse larger than 1 |                      |
|                    |                                | 0 ingen eller en händelse      | 1 mer än en händelse |
| Step 1             | handlt1 händelse larger than 1 | 0 ingen eller en händelse      | 12229                |
|                    |                                | 1 mer än en händelse           | 246                  |
| Overall Percentage |                                |                                |                      |

Classification Table<sup>a</sup>

| Observed           |                                | Predicted                 |       |
|--------------------|--------------------------------|---------------------------|-------|
|                    |                                | Percentage Correct        |       |
| Step 1             | handlt1 händelse larger than 1 | 0 ingen eller en händelse | 100,0 |
|                    |                                | 1 mer än en händelse      | ,0    |
| Overall Percentage |                                |                           | 98,0  |

a. The cut value is ,500

Variables in the Equation

|                         | B        | S.E.   | Wald  | df       | Sig. | Exp(B) | 95% C.I. for EXP(B) |       |
|-------------------------|----------|--------|-------|----------|------|--------|---------------------|-------|
|                         |          |        |       |          |      |        | Lower               | Upper |
| Step 1 <sup>a</sup> bv3 |          |        | 5,206 | 2        | ,074 |        |                     |       |
|                         | bv3(1)   | -,558  | ,248  | 5,061    | 1    | ,024   | ,572                | ,352  |
|                         | bv3(2)   | ,018   | ,178  | ,010     | 1    | ,919   | 1,018               | ,719  |
|                         | Constant | -3,856 | ,074  | 2751,458 | 1    | ,000   | ,021                | 1,443 |

a. Variable(s) entered on step 1: bv3.

LOGISTIC REGRESSION VARIABLES handlt1

/METHOD=ENTER sv3

/CONTRAST (sv3)=Indicator(1)

/PRINT=CI(95)

/CRITERIA=PIN(0.05) POUT(0.10) ITERATE(20) CUT(0.5).

## Block 1: Method = Enter

## Omnibus Tests of Model Coefficients

|        |       | Chi-square | df | Sig. |
|--------|-------|------------|----|------|
| Step 1 | Step  | 2,281      | 2  | ,320 |
|        | Block | 2,281      | 2  | ,320 |
|        | Model | 2,281      | 2  | ,320 |

## Model Summary

| Step | -2 Log likelihood    | Cox & Snell R Square | Nagelkerke R Square |
|------|----------------------|----------------------|---------------------|
| 1    | 2416,50 <sup>a</sup> | ,000                 | ,001                |

a. Estimation terminated at iteration number 7 because parameter estimates changed by less than ,001.

Classification Table<sup>a</sup>

| Observed           |                                |                           | Predicted                      |                           |
|--------------------|--------------------------------|---------------------------|--------------------------------|---------------------------|
|                    |                                |                           | handlt1 händelse larger than 1 | 0 ingen eller en händelse |
| Step 1             | handlt1 händelse larger than 1 | 0 ingen eller en händelse | 12229                          | 0                         |
|                    |                                | 1 mer än en händelse      | 246                            | 0                         |
| Overall Percentage |                                |                           |                                |                           |

Classification Table<sup>a</sup>

| Observed           |                                |                           | Predicted          |
|--------------------|--------------------------------|---------------------------|--------------------|
|                    |                                |                           | Percentage Correct |
| Step 1             | handlt1 händelse larger than 1 | 0 ingen eller en händelse | 100,0              |
|                    |                                | 1 mer än en händelse      | ,0                 |
| Overall Percentage |                                |                           | 98,0               |

a. The cut value is ,500

## Variables in the Equation

|                         | B      | S.E. | Wald    | df | Sig. | Exp(B) | 95% C.I. for EXP(B) |       |
|-------------------------|--------|------|---------|----|------|--------|---------------------|-------|
|                         |        |      |         |    |      |        | Lower               | Upper |
| Step 1 <sup>a</sup> sv3 |        |      | 2,244   | 2  | ,326 |        |                     |       |
| sv3(1)                  | -,229  | ,165 | 1,924   | 1  | ,165 | ,795   | ,576                | 1,099 |
| sv3(2)                  | -,050  | ,160 | ,097    | 1  | ,756 | ,952   | ,696                | 1,302 |
| Constant                | -3,806 | ,122 | 977,776 | 1  | ,000 | ,022   |                     |       |

a. Variable(s) entered on step 1: sv3.

```
LOGISTIC REGRESSION VARIABLES handlt1
/METHOD=ENTER sv5
/CONTRAST (sv5)=Indicator(1)
/PRINT=CI(95)
/CRITERIA=PIN(0.05) POUT(0.10) ITERATE(20) CUT(0.5).
```

## Block 1: Method = Enter

## Omnibus Tests of Model Coefficients

|             | Chi-square | df | Sig. |
|-------------|------------|----|------|
| Step 1 Step | 4,091      | 4  | ,394 |
| Block       | 4,091      | 4  | ,394 |
| Model       | 4,091      | 4  | ,394 |

## Model Summary

| Step | -2 Log likelihood    | Cox & Snell R Square | Nagelkerke R Square |
|------|----------------------|----------------------|---------------------|
| 1    | 2414,69 <sup>a</sup> | ,000                 | ,002                |

a. Estimation terminated at iteration number 7 because parameter estimates changed by less than ,001.



Classification Table<sup>a</sup>

| Observed           |                                | Predicted                 |                      |
|--------------------|--------------------------------|---------------------------|----------------------|
|                    |                                | 0 ingen eller en händelse | 1 mer än en händelse |
| Step 1             | handlt1 händelse larger than 1 | 0 ingen eller en händelse | 12229                |
|                    |                                | 1 mer än en händelse      | 246                  |
| Overall Percentage |                                |                           |                      |

Classification Table<sup>a</sup>

| Observed           |                                | Predicted                 |       |
|--------------------|--------------------------------|---------------------------|-------|
|                    |                                | Percentage Correct        |       |
| Step 1             | handlt1 händelse larger than 1 | 0 ingen eller en händelse | 100,0 |
|                    |                                | 1 mer än en händelse      | ,0    |
| Overall Percentage |                                |                           | 98,0  |

a. The cut value is ,500

Variables in the Equation

|                     | B      | S.E. | Wald    | df | Sig. | Exp(B) | 95% C.I. for EXP(B) |       |
|---------------------|--------|------|---------|----|------|--------|---------------------|-------|
|                     |        |      |         |    |      |        | Lower               | Upper |
| Step 1 <sup>a</sup> |        |      |         |    |      |        |                     |       |
| sv5                 |        |      | 3,932   | 4  | ,415 |        |                     |       |
| sv5(1)              | -,352  | ,205 | 2,932   | 1  | ,087 | ,703   | ,470                | 1,052 |
| sv5(2)              | -,044  | ,226 | ,037    | 1  | ,847 | ,957   | ,614                | 1,492 |
| sv5(3)              | -,070  | ,213 | ,108    | 1  | ,743 | ,933   | ,615                | 1,415 |
| sv5(4)              | -,107  | ,203 | ,278    | 1  | ,598 | ,898   | ,603                | 1,338 |
| Constant            | -3,769 | ,156 | 583,321 | 1  | ,000 | ,023   |                     |       |

a. Variable(s) entered on step 1: sv5.

```
LOGISTIC REGRESSION VARIABLES handlt1
/METHOD=ENTER sv7
/CONTRAST (sv7)=Indicator(1)
/PRINT=CI(95)
/CRITERIA=PIN(0.05) POUT(0.10) ITERATE(20) CUT(0.5).
```

**Block 1: Method = Enter**

**Omnibus Tests of Model Coefficients**

|        |       | Chi-square | df | Sig. |
|--------|-------|------------|----|------|
| Step 1 | Step  | 5,503      | 6  | ,481 |
|        | Block | 5,503      | 6  | ,481 |
|        | Model | 5,503      | 6  | ,481 |

**Model Summary**

| Step | -2 Log likelihood    | Cox & Snell R Square | Nagelkerke R Square |
|------|----------------------|----------------------|---------------------|
| 1    | 2413,28 <sup>a</sup> | ,000                 | ,003                |

a. Estimation terminated at iteration number 7 because parameter estimates changed by less than ,001.

**Classification Table<sup>a</sup>**

| Observed           |                                |                           | Predicted                      |                           |
|--------------------|--------------------------------|---------------------------|--------------------------------|---------------------------|
|                    |                                |                           | handlt1 händelse larger than 1 | 0 ingen eller en händelse |
| Step 1             | handlt1 händelse larger than 1 | 0 ingen eller en händelse | 12229                          | 0                         |
|                    |                                | 1 mer än en händelse      | 246                            | 0                         |
| Overall Percentage |                                |                           |                                |                           |

**Classification Table<sup>a</sup>**

| Observed           |                                |                           | Predicted          |
|--------------------|--------------------------------|---------------------------|--------------------|
|                    |                                |                           | Percentage Correct |
| Step 1             | handlt1 händelse larger than 1 | 0 ingen eller en händelse | 100,0              |
|                    |                                | 1 mer än en händelse      | ,0                 |
| Overall Percentage |                                |                           | 98,0               |

a. The cut value is ,500

## Variables in the Equation

|                         | B      | S.E. | Wald    | df | Sig. | Exp(B) | 95% C.I. for EXP(B) |       |
|-------------------------|--------|------|---------|----|------|--------|---------------------|-------|
|                         |        |      |         |    |      |        | Lower               | Upper |
| Step 1 <sup>a</sup> sv7 |        |      | 5,277   | 6  | ,509 |        |                     |       |
| sv7(1)                  | -,335  | ,237 | 1,996   | 1  | ,158 | ,716   | ,450                | 1,138 |
| sv7(2)                  | -,086  | ,277 | ,096    | 1  | ,757 | ,918   | ,534                | 1,579 |
| sv7(3)                  | ,021   | ,268 | ,006    | 1  | ,938 | 1,021  | ,604                | 1,727 |
| sv7(4)                  | -,086  | ,265 | ,105    | 1  | ,746 | ,918   | ,545                | 1,544 |
| sv7(5)                  | ,116   | ,237 | ,239    | 1  | ,625 | 1,123  | ,705                | 1,788 |
| sv7(6)                  | ,000   | ,238 | ,000    | 1  | ,999 | 1,000  | ,627                | 1,595 |
| Constant                | -3,838 | ,185 | 432,595 | 1  | ,000 | ,022   |                     |       |

a. Variable(s) entered on step 1: sv7.

\*\*

LOGISTIC REGRESSION VARIABLES dod01

/METHOD=ENTER bv1

/CONTRAST (bv1)=Indicator(1)

/PRINT=CI(95)

/CRITERIA=PIN(0.05) POUT(0.10) ITERATE(20) CUT(0.5).

### Block 1: Method = Enter

#### Omnibus Tests of Model Coefficients

|        |       | Chi-square | df | Sig. |
|--------|-------|------------|----|------|
| Step 1 | Step  | 66,252     | 2  | ,000 |
|        | Block | 66,252     | 2  | ,000 |
|        | Model | 66,252     | 2  | ,000 |

#### Model Summary

| Step | -2 Log likelihood    | Cox & Snell R Square | Nagelkerke R Square |
|------|----------------------|----------------------|---------------------|
| 1    | 4958,59 <sup>a</sup> | ,005                 | ,016                |

a. Estimation terminated at iteration number 6 because parameter estimates changed by less than ,001.

Classification Table<sup>a</sup>

| Observed           |                             | Predicted                   |                      |                    |       |
|--------------------|-----------------------------|-----------------------------|----------------------|--------------------|-------|
|                    |                             | dod01 dödsfall ja eller nej |                      | Percentage Correct |       |
|                    |                             | 0 inget dödsfall            | 1 minst ett dödsfall |                    |       |
| Step 1             | dod01 dödsfall ja eller nej | 0 inget dödsfall            | 11839                | 0                  | 100,0 |
|                    |                             | 1 minst ett dödsfall        | 636                  | 0                  | ,0    |
| Overall Percentage |                             |                             |                      |                    | 94,9  |

a. The cut value is ,500

Variables in the Equation

|                         | B      | S.E. | Wald     | df | Sig. | Exp(B) | 95% C.I. for EXP(B) |       |
|-------------------------|--------|------|----------|----|------|--------|---------------------|-------|
|                         |        |      |          |    |      |        | Lower               | Upper |
| Step 1 <sup>a</sup> bv1 |        |      | 60,393   | 2  | ,000 |        |                     |       |
|                         | -,594  | ,123 | 23,445   | 1  | ,000 | ,552   | ,434                | ,702  |
|                         | ,350   | ,088 | 15,616   | 1  | ,000 | 1,418  | 1,193               | 1,687 |
| Constant                | -2,933 | ,062 | 2221,217 | 1  | ,000 | ,053   |                     |       |

a. Variable(s) entered on step 1: bv1.

LOGISTIC REGRESSION VARIABLES dod01

/METHOD=ENTER bv2

/CONTRAST (bv2)=Indicator(1)

/PRINT=CI(95)

/CRITERIA=PIN(0.05) POUT(0.10) ITERATE(20) CUT(0.5).

## Block 1: Method = Enter

Omnibus Tests of Model Coefficients

|        |       | Chi-square | df | Sig. |
|--------|-------|------------|----|------|
| Step 1 | Step  | 55,598     | 2  | ,000 |
|        | Block | 55,598     | 2  | ,000 |
|        | Model | 55,598     | 2  | ,000 |

**Model Summary**

| Step | -2 Log likelihood    | Cox & Snell R Square | Nagelkerke R Square |
|------|----------------------|----------------------|---------------------|
| 1    | 4969,24 <sup>a</sup> | ,004                 | ,013                |

a. Estimation terminated at iteration number 6 because parameter estimates changed by less than ,001.

**Classification Table<sup>a</sup>**

|                    |                             | Predicted                   |                      |                    |       |
|--------------------|-----------------------------|-----------------------------|----------------------|--------------------|-------|
|                    |                             | dod01 dödsfall ja eller nej |                      | Percentage Correct |       |
| Observed           |                             | 0 inget dödsfall            | 1 minst ett dödsfall |                    |       |
| Step 1             | dod01 dödsfall ja eller nej | 0 inget dödsfall            | 11839                | 0                  | 100,0 |
|                    |                             | 1 minst ett dödsfall        | 636                  | 0                  | ,0    |
| Overall Percentage |                             |                             |                      |                    | 94,9  |

a. The cut value is ,500

**Variables in the Equation**

|                     | B        | S.E.   | Wald   | df       | Sig. | Exp(B) | 95% C.I. for EXP(B) |       |
|---------------------|----------|--------|--------|----------|------|--------|---------------------|-------|
|                     |          |        |        |          |      |        | Lower               | Upper |
| Step 1 <sup>a</sup> |          |        |        |          |      |        |                     |       |
|                     | bv2      |        | 52,418 | 2        | ,000 |        |                     |       |
|                     | bv2(1)   | -,407  | ,121   | 11,353   | ,001 | ,665   | ,525                | ,843  |
|                     | bv2(2)   | ,312   | ,103   | 9,131    | ,003 | 1,367  | 1,116               | 1,674 |
|                     | Constant | -2,955 | ,087   | 1145,421 | ,000 | ,052   |                     |       |

a. Variable(s) entered on step 1: bv2.

LOGISTIC REGRESSION VARIABLES dod01

/METHOD=ENTER bv3

/CONTRAST (bv3)=Indicator(1)

/PRINT=CI(95)

/CRITERIA=PIN(0.05) POUT(0.10) ITERATE(20) CUT(0.5).

**Block 1: Method = Enter**

## Omnibus Tests of Model Coefficients

|        |       | Chi-square | df | Sig. |
|--------|-------|------------|----|------|
| Step 1 | Step  | 56,679     | 2  | ,000 |
|        | Block | 56,679     | 2  | ,000 |
|        | Model | 56,679     | 2  | ,000 |

## Model Summary

| Step | -2 Log likelihood    | Cox & Snell R Square | Nagelkerke R Square |
|------|----------------------|----------------------|---------------------|
| 1    | 4968,16 <sup>a</sup> | ,005                 | ,014                |

a. Estimation terminated at iteration number 7 because parameter estimates changed by less than ,001.

Classification Table<sup>a</sup>

| Observed           |                             | Predicted                   |                      |                    |       |
|--------------------|-----------------------------|-----------------------------|----------------------|--------------------|-------|
|                    |                             | dod01 dödsfall ja eller nej |                      | Percentage Correct |       |
|                    |                             | 0 inget dödsfall            | 1 minst ett dödsfall |                    |       |
| Step 1             | dod01 dödsfall ja eller nej | 0 inget dödsfall            | 11839                | 0                  | 100,0 |
|                    |                             | 1 minst ett dödsfall        | 636                  | 0                  | ,0    |
| Overall Percentage |                             |                             |                      |                    | 94,9  |

a. The cut value is ,500

## Variables in the Equation

|                     | B        | S.E.   | Wald   | df       | Sig. | Exp(B) | 95% C.I. for EXP(B) |       |
|---------------------|----------|--------|--------|----------|------|--------|---------------------|-------|
|                     |          |        |        |          |      |        | Lower               | Upper |
| Step 1 <sup>a</sup> |          |        |        |          |      |        |                     |       |
|                     | bv3      |        | 46,793 | 2        | ,000 |        |                     |       |
|                     | bv3(1)   | -,980  | ,190   | 26,502   | ,000 | ,375   | ,258                | ,545  |
|                     | bv3(2)   | ,390   | ,101   | 14,975   | ,000 | 1,476  | 1,212               | 1,798 |
|                     | Constant | -2,915 | ,047   | 3780,133 | ,000 | ,054   |                     |       |

a. Variable(s) entered on step 1: bv3.

LOGISTIC REGRESSION VARIABLES dod01

/METHOD=ENTER sv3

/CONTRAST (sv3)=Indicator(1)

/PRINT=CI(95)

/CRITERIA=PIN(0.05) POUT(0.10) ITERATE(20) CUT(0.5).

## Block 1: Method = Enter

### Omnibus Tests of Model Coefficients

|        |       | Chi-square | df | Sig. |
|--------|-------|------------|----|------|
| Step 1 | Step  | 66,069     | 2  | ,000 |
|        | Block | 66,069     | 2  | ,000 |
|        | Model | 66,069     | 2  | ,000 |

### Model Summary

| Step | -2 Log likelihood    | Cox & Snell R Square | Nagelkerke R Square |
|------|----------------------|----------------------|---------------------|
| 1    | 4958,77 <sup>a</sup> | ,005                 | ,016                |

a. Estimation terminated at iteration number 6 because parameter estimates changed by less than ,001.

### Classification Table<sup>a</sup>

|                    |                             | Predicted                   |                      |                    |       |
|--------------------|-----------------------------|-----------------------------|----------------------|--------------------|-------|
|                    |                             | dod01 dödsfall ja eller nej |                      | Percentage Correct |       |
| Observed           |                             | 0 inget dödsfall            | 1 minst ett dödsfall |                    |       |
| Step 1             | dod01 dödsfall ja eller nej | 0 inget dödsfall            | 11839                | 0                  | 100,0 |
|                    |                             | 1 minst ett dödsfall        | 636                  | 0                  | ,0    |
| Overall Percentage |                             |                             |                      |                    | 94,9  |

a. The cut value is ,500

### Variables in the Equation

|                     | B        | S.E.   | Wald   | df       | Sig. | Exp(B) | 95% C.I. for EXP(B) |       |       |
|---------------------|----------|--------|--------|----------|------|--------|---------------------|-------|-------|
|                     |          |        |        |          |      |        | Lower               | Upper |       |
| Step 1 <sup>a</sup> | sv3      |        | 59,299 | 2        | ,000 |        |                     |       |       |
|                     | sv3(1)   | -,754  | ,111   | 46,314   | 1    | ,000   | ,470                | ,379  | ,584  |
|                     | sv3(2)   | -,027  | ,095   | ,083     | 1    | ,773   | ,973                | ,808  | 1,172 |
|                     | Constant | -2,683 | ,073   | 1367,544 | 1    | ,000   | ,068                |       |       |

a. Variable(s) entered on step 1: sv3.

LOGISTIC REGRESSION VARIABLES dod01  
 /METHOD=ENTER sv5  
 /CONTRAST (sv5)=Indicator(1)  
 /PRINT=CI(95)  
 /CRITERIA=PIN(0.05) POUT(0.10) ITERATE(20) CUT(0.5).

## Block 1: Method = Enter

### Omnibus Tests of Model Coefficients

|        |       | Chi-square | df | Sig. |
|--------|-------|------------|----|------|
| Step 1 | Step  | 91,578     | 4  | ,000 |
|        | Block | 91,578     | 4  | ,000 |
|        | Model | 91,578     | 4  | ,000 |

### Model Summary

| Step | -2 Log likelihood    | Cox & Snell R Square | Nagelkerke R Square |
|------|----------------------|----------------------|---------------------|
| 1    | 4933,26 <sup>a</sup> | ,007                 | ,022                |

a. Estimation terminated at iteration number 6 because parameter estimates changed by less than ,001.

### Classification Table<sup>a</sup>

|                    |                             | Predicted                   |                      |                    |       |
|--------------------|-----------------------------|-----------------------------|----------------------|--------------------|-------|
|                    |                             | dod01 dödsfall ja eller nej |                      | Percentage Correct |       |
| Observed           |                             | 0 inget dödsfall            | 1 minst ett dödsfall |                    |       |
| Step 1             | dod01 dödsfall ja eller nej | 0 inget dödsfall            | 11839                | 0                  | 100,0 |
|                    |                             | 1 minst ett dödsfall        | 636                  | 0                  | ,0    |
| Overall Percentage |                             |                             |                      |                    | 94,9  |

a. The cut value is ,500



## Variables in the Equation

|                         | B      | S.E. | Wald    | df | Sig. | Exp(B) | 95% C.I. for EXP(B) |       |
|-------------------------|--------|------|---------|----|------|--------|---------------------|-------|
|                         |        |      |         |    |      |        | Lower               | Upper |
| Step 1 <sup>a</sup> sv5 |        |      | 75,882  | 4  | ,000 |        |                     |       |
| sv5(1)                  | -1,026 | ,144 | 50,528  | 1  | ,000 | ,359   | ,270                | ,476  |
| sv5(2)                  | -,176  | ,141 | 1,557   | 1  | ,212 | ,838   | ,636                | 1,106 |
| sv5(3)                  | ,096   | ,124 | ,602    | 1  | ,438 | 1,101  | ,863                | 1,405 |
| sv5(4)                  | -,121  | ,123 | ,962    | 1  | ,327 | ,886   | ,696                | 1,128 |
| Constant                | -2,676 | ,094 | 803,889 | 1  | ,000 | ,069   |                     |       |

a. Variable(s) entered on step 1: sv5.

LOGISTIC REGRESSION VARIABLES dod01

/METHOD=ENTER sv7

/CONTRAST (sv7)=Indicator(1)

/PRINT=CI(95)

/CRITERIA=PIN(0.05) POUT(0.10) ITERATE(20) CUT(0.5).

## Block 1: Method = Enter

## Omnibus Tests of Model Coefficients

|        |       | Chi-square | df | Sig. |
|--------|-------|------------|----|------|
| Step 1 | Step  | 130,180    | 6  | ,000 |
|        | Block | 130,180    | 6  | ,000 |
|        | Model | 130,180    | 6  | ,000 |

## Model Summary

| Step | -2 Log likelihood    | Cox & Snell R Square | Nagelkerke R Square |
|------|----------------------|----------------------|---------------------|
| 1    | 4894,66 <sup>a</sup> | ,010                 | ,031                |

a. Estimation terminated at iteration number 7 because parameter estimates changed by less than ,001.

Classification Table<sup>a</sup>

| Observed           |                             | Predicted                   |                      |                    |       |
|--------------------|-----------------------------|-----------------------------|----------------------|--------------------|-------|
|                    |                             | dod01 dödsfall ja eller nej |                      | Percentage Correct |       |
|                    |                             | 0 inget dödsfall            | 1 minst ett dödsfall |                    |       |
| Step 1             | dod01 dödsfall ja eller nej | 0 inget dödsfall            | 11839                | 0                  | 100,0 |
|                    |                             | 1 minst ett dödsfall        | 636                  | 0                  | ,0    |
| Overall Percentage |                             |                             |                      |                    | 94,9  |

a. The cut value is ,500

Variables in the Equation

|                         | B      | S.E. | Wald    | df | Sig. | Exp(B) | 95% C.I. for EXP(B) |       |
|-------------------------|--------|------|---------|----|------|--------|---------------------|-------|
|                         |        |      |         |    |      |        | Lower               | Upper |
| Step 1 <sup>a</sup> sv7 |        |      | 96,884  | 6  | ,000 |        |                     |       |
| sv7(1)                  | -1,292 | ,179 | 52,022  | 1  | ,000 | ,275   | ,193                | ,390  |
| sv7(2)                  | ,001   | ,164 | ,000    | 1  | ,996 | 1,001  | ,726                | 1,380 |
| sv7(3)                  | -,043  | ,165 | ,067    | 1  | ,795 | ,958   | ,693                | 1,324 |
| sv7(4)                  | ,200   | ,151 | 1,740   | 1  | ,187 | 1,221  | ,908                | 1,642 |
| sv7(5)                  | ,221   | ,142 | 2,431   | 1  | ,119 | 1,247  | ,945                | 1,646 |
| sv7(6)                  | -,196  | ,150 | 1,705   | 1  | ,192 | ,822   | ,613                | 1,103 |
| Constant                | -2,756 | ,112 | 607,179 | 1  | ,000 | ,064   |                     |       |

a. Variable(s) entered on step 1: sv7.

COMMENT körs på abo\_bjo\_vasa\_v1.sav

COMMENT med kontroll för VASTY2 (i stället för VASTY, som användes i bara-varianten)

COMMENT läses i Table 2 som första kolumnen, sex modeller, andra kolumnen, sex modeller, osv

\*\*

LOGISTIC REGRESSION VARIABLES hand01

/METHOD=ENTER bv1 VASTY2

/CONTRAST (bv1)=Indicator(1)

/CONTRAST (VASTY2)=Indicator(1)

/PRINT=CI(95)

/CRITERIA=PIN(0.05) POUT(0.10) ITERATE(20) CUT(0.5).

## Block 1: Method = Enter

### Omnibus Tests of Model Coefficients

|        |       | Chi-square | df | Sig. |
|--------|-------|------------|----|------|
| Step 1 | Step  | 572,673    | 37 | ,000 |
|        | Block | 572,673    | 37 | ,000 |
|        | Model | 572,673    | 37 | ,000 |

### Model Summary

| Step | -2 Log likelihood    | Cox & Snell R Square | Nagelkerke R Square |
|------|----------------------|----------------------|---------------------|
| 1    | 8050,91 <sup>a</sup> | ,045                 | ,090                |

a. Estimation terminated at iteration number 6 because parameter estimates changed by less than ,001.

Classification Table<sup>a</sup>

| Observed           |                              | Predicted                    |                     |                    |       |
|--------------------|------------------------------|------------------------------|---------------------|--------------------|-------|
|                    |                              | hand01 händelse nej eller ja |                     | Percentage Correct |       |
|                    |                              | 0 ingen händelse             | 1 minst en händelse |                    |       |
| Step 1             | hand01 händelse nej eller ja | 0 ingen händelse             | 11108               | 0                  | 100,0 |
|                    |                              | 1 minst en händelse          | 1367                | 0                  | ,0    |
| Overall Percentage |                              |                              |                     |                    | 89,0  |

a. The cut value is ,500

Variables in the Equation

|                     |            | B      | S.E. | Wald    | df | Sig. | Exp(B) | 95% C.I. for EXP(B) |       |
|---------------------|------------|--------|------|---------|----|------|--------|---------------------|-------|
|                     |            |        |      |         |    |      |        | Lower               | Upper |
| Step 1 <sup>a</sup> | bv1        |        |      | 33,531  | 2  | ,000 |        |                     |       |
|                     | bv1(1)     | -,273  | ,084 | 10,589  | 1  | ,001 | ,761   | ,646                | ,897  |
|                     | bv1(2)     | ,236   | ,069 | 11,724  | 1  | ,001 | 1,267  | 1,106               | 1,450 |
|                     | VASTY2     |        |      | 430,566 | 35 | ,000 |        |                     |       |
|                     | VASTY2(1)  | ,335   | ,240 | 1,952   | 1  | ,162 | 1,398  | ,874                | 2,237 |
|                     | VASTY2(2)  | 1,183  | ,216 | 29,867  | 1  | ,000 | 3,264  | 2,136               | 4,990 |
|                     | VASTY2(3)  | -,863  | ,304 | 8,076   | 1  | ,004 | ,422   | ,233                | ,765  |
|                     | VASTY2(4)  | ,149   | ,243 | ,373    | 1  | ,541 | 1,160  | ,720                | 1,869 |
|                     | VASTY2(5)  | -,382  | ,282 | 1,835   | 1  | ,176 | ,682   | ,393                | 1,186 |
|                     | VASTY2(6)  | -1,058 | ,328 | 10,418  | 1  | ,001 | ,347   | ,183                | ,660  |
|                     | VASTY2(7)  | 1,041  | ,220 | 22,367  | 1  | ,000 | 2,831  | 1,839               | 4,357 |
|                     | VASTY2(8)  | ,251   | ,240 | 1,091   | 1  | ,296 | 1,285  | ,803                | 2,058 |
|                     | VASTY2(9)  | ,187   | ,246 | ,575    | 1  | ,448 | 1,205  | ,744                | 1,953 |
|                     | VASTY2(10) | 1,007  | ,219 | 21,086  | 1  | ,000 | 2,737  | 1,781               | 4,205 |
|                     | VASTY2(11) | ,871   | ,223 | 15,290  | 1  | ,000 | 2,390  | 1,544               | 3,699 |
|                     | VASTY2(12) | ,073   | ,248 | ,087    | 1  | ,768 | 1,076  | ,662                | 1,749 |
|                     | VASTY2(13) | ,747   | ,224 | 11,090  | 1  | ,001 | 2,110  | 1,360               | 3,275 |
|                     | VASTY2(14) | -,305  | ,268 | 1,298   | 1  | ,255 | ,737   | ,436                | 1,246 |
|                     | VASTY2(15) | ,225   | ,242 | ,868    | 1  | ,351 | 1,253  | ,780                | 2,013 |
|                     | VASTY2(16) | ,339   | ,288 | 1,382   | 1  | ,240 | 1,403  | ,798                | 2,468 |
|                     | VASTY2(17) | -1,178 | ,356 | 10,981  | 1  | ,001 | ,308   | ,153                | ,618  |
|                     | VASTY2(18) | -,881  | ,320 | 7,585   | 1  | ,006 | ,414   | ,221                | ,776  |
|                     | VASTY2(19) | -1,194 | ,386 | 9,555   | 1  | ,002 | ,303   | ,142                | ,646  |
|                     | VASTY2(20) | ,059   | ,261 | ,051    | 1  | ,821 | 1,061  | ,636                | 1,770 |
|                     | VASTY2(21) | -,188  | ,263 | ,512    | 1  | ,474 | ,829   | ,495                | 1,387 |
|                     | VASTY2(22) | ,160   | ,252 | ,400    | 1  | ,527 | 1,173  | ,715                | 1,924 |
|                     | VASTY2(23) | ,731   | ,228 | 10,316  | 1  | ,001 | 2,077  | 1,330               | 3,245 |
|                     | VASTY2(24) | ,530   | ,230 | 5,313   | 1  | ,021 | 1,699  | 1,083               | 2,666 |
|                     | VASTY2(25) | ,123   | ,264 | ,216    | 1  | ,642 | 1,131  | ,674                | 1,897 |

## Variables in the Equation

|            | B      | S.E. | Wald    | df | Sig. | Exp(B) | 95% C.I. for EXP(B) |       |
|------------|--------|------|---------|----|------|--------|---------------------|-------|
|            |        |      |         |    |      |        | Lower               | Upper |
| VASTY2(26) | -,864  | ,337 | 6,584   | 1  | ,010 | ,421   | ,218                | ,815  |
| VASTY2(27) | -1,303 | ,356 | 13,384  | 1  | ,000 | ,272   | ,135                | ,546  |
| VASTY2(28) | -,918  | ,371 | 6,121   | 1  | ,013 | ,399   | ,193                | ,826  |
| VASTY2(29) | -,942  | ,320 | 8,679   | 1  | ,003 | ,390   | ,208                | ,730  |
| VASTY2(30) | ,003   | ,252 | ,000    | 1  | ,991 | 1,003  | ,612                | 1,643 |
| VASTY2(31) | ,518   | ,233 | 4,927   | 1  | ,026 | 1,679  | 1,062               | 2,652 |
| VASTY2(32) | -,020  | ,259 | ,006    | 1  | ,939 | ,980   | ,590                | 1,630 |
| VASTY2(33) | -,013  | ,257 | ,002    | 1  | ,961 | ,987   | ,596                | 1,635 |
| VASTY2(34) | -1,557 | ,401 | 15,103  | 1  | ,000 | ,211   | ,096                | ,462  |
| VASTY2(35) | ,348   | ,244 | 2,032   | 1  | ,154 | 1,416  | ,878                | 2,284 |
| Constant   | -2,236 | ,182 | 150,660 | 1  | ,000 | ,107   |                     |       |

a. Variable(s) entered on step 1: bv1, VASTY2.

```
LOGISTIC REGRESSION VARIABLES hand01
/METHOD=ENTER bv2 VASTY2
/CONTRAST (bv2)=Indicator(1)
/CONTRAST (VASTY2)=Indicator(1)
/PRINT=CI(95)
/CRITERIA=PIN(0.05) POUT(0.10) ITERATE(20) CUT(0.5).
```

**Block 1: Method = Enter****Omnibus Tests of Model Coefficients**

|        |       | Chi-square | df | Sig. |
|--------|-------|------------|----|------|
| Step 1 | Step  | 561,168    | 37 | ,000 |
|        | Block | 561,168    | 37 | ,000 |
|        | Model | 561,168    | 37 | ,000 |

**Model Summary**

| Step | -2 Log likelihood    | Cox & Snell R Square | Nagelkerke R Square |
|------|----------------------|----------------------|---------------------|
| 1    | 8062,41 <sup>a</sup> | ,044                 | ,088                |

a. Estimation terminated at iteration number 6 because parameter estimates changed by less than ,001.

Classification Table<sup>a</sup>

| Observed           |                              | Predicted                    |                     |                    |       |
|--------------------|------------------------------|------------------------------|---------------------|--------------------|-------|
|                    |                              | hand01 händelse nej eller ja |                     | Percentage Correct |       |
|                    |                              | 0 ingen händelse             | 1 minst en händelse |                    |       |
| Step 1             | hand01 händelse nej eller ja | 0 ingen händelse             | 11108               | 0                  | 100,0 |
|                    |                              | 1 minst en händelse          | 1367                | 0                  | ,0    |
| Overall Percentage |                              |                              |                     |                    | 89,0  |

a. The cut value is ,500

Variables in the Equation

|                     | B      | S.E. | Wald    | df | Sig. | Exp(B) | 95% C.I. for EXP(B) |       |
|---------------------|--------|------|---------|----|------|--------|---------------------|-------|
|                     |        |      |         |    |      |        | Lower               | Upper |
| Step 1 <sup>a</sup> |        |      |         |    |      |        |                     |       |
| bv2                 |        |      | 22,320  | 2  | ,000 |        |                     |       |
| bv2(1)              | -,194  | ,084 | 5,283   | 1  | ,022 | ,824   | ,698                | ,972  |
| bv2(2)              | ,157   | ,077 | 4,191   | 1  | ,041 | 1,170  | 1,007               | 1,360 |
| VASTY2              |        |      | 433,569 | 35 | ,000 |        |                     |       |
| VASTY2(1)           | ,327   | ,240 | 1,865   | 1  | ,172 | 1,387  | ,867                | 2,220 |
| VASTY2(2)           | 1,187  | ,216 | 30,073  | 1  | ,000 | 3,277  | 2,144               | 5,009 |
| VASTY2(3)           | -,816  | ,303 | 7,252   | 1  | ,007 | ,442   | ,244                | ,801  |
| VASTY2(4)           | ,181   | ,243 | ,557    | 1  | ,455 | 1,199  | ,745                | 1,929 |
| VASTY2(5)           | -,372  | ,282 | 1,741   | 1  | ,187 | ,689   | ,397                | 1,198 |
| VASTY2(6)           | -1,022 | ,327 | 9,750   | 1  | ,002 | ,360   | ,189                | ,683  |
| VASTY2(7)           | 1,088  | ,219 | 24,651  | 1  | ,000 | 2,967  | 1,932               | 4,559 |
| VASTY2(8)           | ,259   | ,240 | 1,162   | 1  | ,281 | 1,296  | ,809                | 2,075 |
| VASTY2(9)           | ,201   | ,246 | ,664    | 1  | ,415 | 1,222  | ,754                | 1,980 |
| VASTY2(10)          | 1,018  | ,219 | 21,559  | 1  | ,000 | 2,767  | 1,801               | 4,252 |
| VASTY2(11)          | ,882   | ,223 | 15,690  | 1  | ,000 | 2,415  | 1,561               | 3,736 |
| VASTY2(12)          | ,084   | ,248 | ,115    | 1  | ,735 | 1,088  | ,669                | 1,768 |
| VASTY2(13)          | ,771   | ,224 | 11,820  | 1  | ,001 | 2,162  | 1,393               | 3,355 |
| VASTY2(14)          | -,289  | ,268 | 1,166   | 1  | ,280 | ,749   | ,443                | 1,265 |
| VASTY2(15)          | ,226   | ,242 | ,874    | 1  | ,350 | 1,254  | ,780                | 2,015 |
| VASTY2(16)          | ,353   | ,288 | 1,507   | 1  | ,220 | 1,424  | ,810                | 2,502 |
| VASTY2(17)          | -1,172 | ,356 | 10,874  | 1  | ,001 | ,310   | ,154                | ,622  |
| VASTY2(18)          | -,876  | ,320 | 7,506   | 1  | ,006 | ,416   | ,223                | ,779  |
| VASTY2(19)          | -1,252 | ,385 | 10,579  | 1  | ,001 | ,286   | ,135                | ,608  |
| VASTY2(20)          | ,088   | ,261 | ,114    | 1  | ,736 | 1,092  | ,655                | 1,820 |
| VASTY2(21)          | -,179  | ,263 | ,464    | 1  | ,496 | ,836   | ,500                | 1,399 |
| VASTY2(22)          | ,156   | ,253 | ,383    | 1  | ,536 | 1,169  | ,713                | 1,918 |
| VASTY2(23)          | ,723   | ,227 | 10,093  | 1  | ,001 | 2,060  | 1,319               | 3,218 |
| VASTY2(24)          | ,564   | ,230 | 6,034   | 1  | ,014 | 1,758  | 1,121               | 2,758 |
| VASTY2(25)          | ,128   | ,264 | ,234    | 1  | ,628 | 1,136  | ,677                | 1,907 |

Variables in the Equation

|            | B      | S.E. | Wald    | df | Sig. | Exp(B) | 95% C.I. for EXP(B) |       |
|------------|--------|------|---------|----|------|--------|---------------------|-------|
|            |        |      |         |    |      |        | Lower               | Upper |
| VASTY2(26) | -,852  | ,337 | 6,410   | 1  | ,011 | ,426   | ,220                | ,825  |
| VASTY2(27) | -1,284 | ,356 | 13,006  | 1  | ,000 | ,277   | ,138                | ,556  |
| VASTY2(28) | -,907  | ,371 | 5,970   | 1  | ,015 | ,404   | ,195                | ,836  |
| VASTY2(29) | -,923  | ,320 | 8,342   | 1  | ,004 | ,397   | ,212                | ,743  |
| VASTY2(30) | ,019   | ,252 | ,005    | 1  | ,941 | 1,019  | ,622                | 1,669 |
| VASTY2(31) | ,527   | ,233 | 5,125   | 1  | ,024 | 1,694  | 1,073               | 2,674 |
| VASTY2(32) | -,025  | ,259 | ,010    | 1  | ,922 | ,975   | ,587                | 1,620 |
| VASTY2(33) | -,014  | ,257 | ,003    | 1  | ,957 | ,986   | ,596                | 1,632 |
| VASTY2(34) | -1,546 | ,401 | 14,904  | 1  | ,000 | ,213   | ,097                | ,467  |
| VASTY2(35) | ,390   | ,243 | 2,571   | 1  | ,109 | 1,477  | ,917                | 2,379 |
| Constant   | -2,238 | ,187 | 143,934 | 1  | ,000 | ,107   |                     |       |

a. Variable(s) entered on step 1: bv2, VASTY2.

```
LOGISTIC REGRESSION VARIABLES hand01
/METHOD=ENTER bv3 VASTY2
/CONTRAST (bv3)=Indicator(1)
/CONTRAST (VASTY2)=Indicator(1)
/PRINT=CI(95)
/CRITERIA=PIN(0.05) POUT(0.10) ITERATE(20) CUT(0.5).
```

### Block 1: Method = Enter

#### Omnibus Tests of Model Coefficients

|        |       | Chi-square | df | Sig. |
|--------|-------|------------|----|------|
| Step 1 | Step  | 563,072    | 37 | ,000 |
|        | Block | 563,072    | 37 | ,000 |
|        | Model | 563,072    | 37 | ,000 |

#### Model Summary

| Step | -2 Log likelihood    | Cox & Snell R Square | Nagelkerke R Square |
|------|----------------------|----------------------|---------------------|
| 1    | 8060,51 <sup>a</sup> | ,044                 | ,088                |

a. Estimation terminated at iteration number 6 because parameter estimates changed by less than ,001.

Classification Table<sup>a</sup>

| Observed           |                              | Predicted                    |                     |                    |       |
|--------------------|------------------------------|------------------------------|---------------------|--------------------|-------|
|                    |                              | hand01 händelse nej eller ja |                     | Percentage Correct |       |
|                    |                              | 0 ingen händelse             | 1 minst en händelse |                    |       |
| Step 1             | hand01 händelse nej eller ja | 0 ingen händelse             | 11108               | 0                  | 100,0 |
|                    |                              | 1 minst en händelse          | 1367                | 0                  | ,0    |
| Overall Percentage |                              |                              |                     |                    | 89,0  |

a. The cut value is ,500

Variables in the Equation

|                     |            | B      | S.E. | Wald    | df | Sig. | Exp(B) | 95% C.I. for EXP(B) |       |
|---------------------|------------|--------|------|---------|----|------|--------|---------------------|-------|
|                     |            |        |      |         |    |      |        | Lower               | Upper |
| Step 1 <sup>a</sup> | bv3        |        |      | 23,032  | 2  | ,000 |        |                     |       |
|                     | bv3(1)     | -,459  | ,117 | 15,260  | 1  | ,000 | ,632   | ,502                | ,796  |
|                     | bv3(2)     | ,190   | ,083 | 5,198   | 1  | ,023 | 1,209  | 1,027               | 1,424 |
|                     | VASTY2     |        |      | 434,065 | 35 | ,000 |        |                     |       |
|                     | VASTY2(1)  | ,380   | ,240 | 2,505   | 1  | ,113 | 1,462  | ,914                | 2,339 |
|                     | VASTY2(2)  | 1,217  | ,216 | 31,701  | 1  | ,000 | 3,378  | 2,211               | 5,160 |
|                     | VASTY2(3)  | -,782  | ,303 | 6,655   | 1  | ,010 | ,457   | ,253                | ,829  |
|                     | VASTY2(4)  | ,209   | ,243 | ,740    | 1  | ,390 | 1,233  | ,766                | 1,984 |
|                     | VASTY2(5)  | -,338  | ,282 | 1,439   | 1  | ,230 | ,713   | ,411                | 1,239 |
|                     | VASTY2(6)  | -1,001 | ,328 | 9,317   | 1  | ,002 | ,368   | ,193                | ,699  |
|                     | VASTY2(7)  | 1,105  | ,221 | 24,884  | 1  | ,000 | 3,019  | 1,956               | 4,660 |
|                     | VASTY2(8)  | ,304   | ,240 | 1,612   | 1  | ,204 | 1,356  | ,847                | 2,169 |
|                     | VASTY2(9)  | ,248   | ,246 | 1,014   | 1  | ,314 | 1,281  | ,791                | 2,074 |
|                     | VASTY2(10) | 1,050  | ,219 | 23,059  | 1  | ,000 | 2,859  | 1,862               | 4,390 |
|                     | VASTY2(11) | ,907   | ,223 | 16,604  | 1  | ,000 | 2,478  | 1,601               | 3,833 |
|                     | VASTY2(12) | ,124   | ,247 | ,250    | 1  | ,617 | 1,132  | ,697                | 1,838 |
|                     | VASTY2(13) | ,841   | ,223 | 14,230  | 1  | ,000 | 2,319  | 1,498               | 3,590 |
|                     | VASTY2(14) | -,246  | ,267 | ,845    | 1  | ,358 | ,782   | ,463                | 1,321 |
|                     | VASTY2(15) | ,268   | ,242 | 1,228   | 1  | ,268 | 1,307  | ,814                | 2,099 |
|                     | VASTY2(16) | ,365   | ,289 | 1,600   | 1  | ,206 | 1,441  | ,818                | 2,538 |
|                     | VASTY2(17) | -1,180 | ,355 | 11,026  | 1  | ,001 | ,307   | ,153                | ,617  |
|                     | VASTY2(18) | -,861  | ,320 | 7,248   | 1  | ,007 | ,423   | ,226                | ,791  |
|                     | VASTY2(19) | -1,136 | ,388 | 8,571   | 1  | ,003 | ,321   | ,150                | ,687  |
|                     | VASTY2(20) | ,115   | ,261 | ,195    | 1  | ,658 | 1,122  | ,673                | 1,872 |
|                     | VASTY2(21) | -,156  | ,262 | ,353    | 1  | ,552 | ,856   | ,512                | 1,431 |
|                     | VASTY2(22) | ,112   | ,252 | ,197    | 1  | ,657 | 1,118  | ,683                | 1,832 |
|                     | VASTY2(23) | ,738   | ,228 | 10,514  | 1  | ,001 | 2,091  | 1,339               | 3,267 |
|                     | VASTY2(24) | ,588   | ,230 | 6,550   | 1  | ,010 | 1,800  | 1,148               | 2,823 |
|                     | VASTY2(25) | ,147   | ,264 | ,311    | 1  | ,577 | 1,159  | ,690                | 1,945 |



## Variables in the Equation

|            | B      | S.E. | Wald    | df | Sig. | Exp(B) | 95% C.I. for EXP(B) |       |
|------------|--------|------|---------|----|------|--------|---------------------|-------|
|            |        |      |         |    |      |        | Lower               | Upper |
| VASTY2(26) | -,806  | ,337 | 5,742   | 1  | ,017 | ,446   | ,231                | ,863  |
| VASTY2(27) | -1,231 | ,356 | 11,964  | 1  | ,001 | ,292   | ,145                | ,587  |
| VASTY2(28) | -,842  | ,370 | 5,165   | 1  | ,023 | ,431   | ,208                | ,891  |
| VASTY2(29) | -,916  | ,319 | 8,224   | 1  | ,004 | ,400   | ,214                | ,748  |
| VASTY2(30) | ,018   | ,252 | ,005    | 1  | ,943 | 1,018  | ,622                | 1,667 |
| VASTY2(31) | ,581   | ,234 | 6,147   | 1  | ,013 | 1,787  | 1,129               | 2,828 |
| VASTY2(32) | ,037   | ,260 | ,020    | 1  | ,888 | 1,037  | ,623                | 1,728 |
| VASTY2(33) | ,045   | ,258 | ,031    | 1  | ,860 | 1,046  | ,631                | 1,734 |
| VASTY2(34) | -1,535 | ,400 | 14,698  | 1  | ,000 | ,215   | ,098                | ,472  |
| VASTY2(35) | ,411   | ,244 | 2,829   | 1  | ,093 | 1,508  | ,934                | 2,435 |
| Constant   | -2,246 | ,180 | 155,166 | 1  | ,000 | ,106   |                     |       |

a. Variable(s) entered on step 1: bv3, VASTY2.

LOGISTIC REGRESSION VARIABLES hand01

/METHOD=ENTER sv3 VASTY2

/CONTRAST (sv3)=Indicator(1)

/CONTRAST (VASTY2)=Indicator(1)

/PRINT=CI(95)

/CRITERIA=PIN(0.05) POUT(0.10) ITERATE(20) CUT(0.5).

### Block 1: Method = Enter

#### Omnibus Tests of Model Coefficients

|        |       | Chi-square | df | Sig. |
|--------|-------|------------|----|------|
| Step 1 | Step  | 550,088    | 37 | ,000 |
|        | Block | 550,088    | 37 | ,000 |
|        | Model | 550,088    | 37 | ,000 |

#### Model Summary

| Step | -2 Log likelihood    | Cox & Snell R Square | Nagelkerke R Square |
|------|----------------------|----------------------|---------------------|
| 1    | 8073,49 <sup>a</sup> | ,043                 | ,086                |

a. Estimation terminated at iteration number 6 because parameter estimates changed by less than ,001.

Classification Table<sup>a</sup>

| Observed           |                              | Predicted                    |                     |                    |       |
|--------------------|------------------------------|------------------------------|---------------------|--------------------|-------|
|                    |                              | hand01 händelse nej eller ja |                     | Percentage Correct |       |
|                    |                              | 0 ingen händelse             | 1 minst en händelse |                    |       |
| Step 1             | hand01 händelse nej eller ja | 0 ingen händelse             | 11108               | 0                  | 100,0 |
|                    |                              | 1 minst en händelse          | 1367                | 0                  | ,0    |
| Overall Percentage |                              |                              |                     |                    | 89,0  |

a. The cut value is ,500

Variables in the Equation

|                     | B      | S.E. | Wald    | df | Sig. | Exp(B) | 95% C.I. for EXP(B) |       |
|---------------------|--------|------|---------|----|------|--------|---------------------|-------|
|                     |        |      |         |    |      |        | Lower               | Upper |
| Step 1 <sup>a</sup> |        |      |         |    |      |        |                     |       |
| sv3                 |        |      | 11,508  | 2  | ,003 |        |                     |       |
| sv3(1)              | -,161  | ,085 | 3,579   | 1  | ,059 | ,851   | ,720                | 1,006 |
| sv3(2)              | ,150   | ,083 | 3,287   | 1  | ,070 | 1,162  | ,988                | 1,367 |
| VASTY2              |        |      | 430,840 | 35 | ,000 |        |                     |       |
| VASTY2(1)           | ,306   | ,240 | 1,621   | 1  | ,203 | 1,358  | ,848                | 2,176 |
| VASTY2(2)           | 1,125  | ,219 | 26,358  | 1  | ,000 | 3,081  | 2,005               | 4,734 |
| VASTY2(3)           | -,648  | ,302 | 4,609   | 1  | ,032 | ,523   | ,290                | ,945  |
| VASTY2(4)           | ,318   | ,242 | 1,726   | 1  | ,189 | 1,374  | ,855                | 2,207 |
| VASTY2(5)           | -,228  | ,283 | ,652    | 1  | ,419 | ,796   | ,457                | 1,385 |
| VASTY2(6)           | -1,074 | ,330 | 10,579  | 1  | ,001 | ,342   | ,179                | ,653  |
| VASTY2(7)           | 1,262  | ,217 | 33,909  | 1  | ,000 | 3,534  | 2,311               | 5,405 |
| VASTY2(8)           | ,400   | ,240 | 2,777   | 1  | ,096 | 1,492  | ,932                | 2,390 |
| VASTY2(9)           | ,285   | ,245 | 1,350   | 1  | ,245 | 1,330  | ,822                | 2,152 |
| VASTY2(10)          | ,957   | ,223 | 18,428  | 1  | ,000 | 2,605  | 1,682               | 4,032 |
| VASTY2(11)          | ,916   | ,222 | 16,937  | 1  | ,000 | 2,498  | 1,615               | 3,863 |
| VASTY2(12)          | ,048   | ,250 | ,037    | 1  | ,847 | 1,049  | ,643                | 1,712 |
| VASTY2(13)          | ,773   | ,227 | 11,569  | 1  | ,001 | 2,165  | 1,387               | 3,379 |
| VASTY2(14)          | -,288  | ,268 | 1,154   | 1  | ,283 | ,750   | ,443                | 1,268 |
| VASTY2(15)          | ,181   | ,245 | ,545    | 1  | ,460 | 1,198  | ,742                | 1,934 |
| VASTY2(16)          | ,364   | ,288 | 1,601   | 1  | ,206 | 1,440  | ,819                | 2,531 |
| VASTY2(17)          | -1,150 | ,356 | 10,442  | 1  | ,001 | ,317   | ,158                | ,636  |
| VASTY2(18)          | -,708  | ,325 | 4,757   | 1  | ,029 | ,493   | ,261                | ,931  |
| VASTY2(19)          | -1,244 | ,387 | 10,321  | 1  | ,001 | ,288   | ,135                | ,616  |
| VASTY2(20)          | ,090   | ,261 | ,118    | 1  | ,731 | 1,094  | ,656                | 1,825 |
| VASTY2(21)          | -,091  | ,263 | ,121    | 1  | ,728 | ,913   | ,545                | 1,527 |
| VASTY2(22)          | ,062   | ,252 | ,061    | 1  | ,804 | 1,064  | ,650                | 1,743 |
| VASTY2(23)          | ,736   | ,228 | 10,476  | 1  | ,001 | 2,089  | 1,337               | 3,262 |
| VASTY2(24)          | ,621   | ,229 | 7,361   | 1  | ,007 | 1,861  | 1,188               | 2,915 |
| VASTY2(25)          | ,178   | ,265 | ,452    | 1  | ,502 | 1,195  | ,711                | 2,007 |

Variables in the Equation

|            | B      | S.E. | Wald    | df | Sig. | Exp(B) | 95% C.I. for EXP(B) |       |
|------------|--------|------|---------|----|------|--------|---------------------|-------|
|            |        |      |         |    |      |        | Lower               | Upper |
| VASTY2(26) | -,800  | ,336 | 5,652   | 1  | ,017 | ,450   | ,233                | ,869  |
| VASTY2(27) | -1,284 | ,357 | 12,956  | 1  | ,000 | ,277   | ,138                | ,557  |
| VASTY2(28) | -,941  | ,374 | 6,328   | 1  | ,012 | ,390   | ,188                | ,812  |
| VASTY2(29) | -1,029 | ,324 | 10,101  | 1  | ,001 | ,357   | ,189                | ,674  |
| VASTY2(30) | ,127   | ,253 | ,251    | 1  | ,616 | 1,135  | ,692                | 1,862 |
| VASTY2(31) | ,684   | ,238 | 8,295   | 1  | ,004 | 1,983  | 1,244               | 3,159 |
| VASTY2(32) | ,107   | ,265 | ,163    | 1  | ,687 | 1,113  | ,662                | 1,870 |
| VASTY2(33) | ,132   | ,263 | ,250    | 1  | ,617 | 1,141  | ,681                | 1,910 |
| VASTY2(34) | -1,514 | ,400 | 14,299  | 1  | ,000 | ,220   | ,100                | ,482  |
| VASTY2(35) | ,470   | ,242 | 3,770   | 1  | ,052 | 1,601  | ,996                | 2,574 |
| Constant   | -2,273 | ,184 | 152,586 | 1  | ,000 | ,103   |                     |       |

a. Variable(s) entered on step 1: sv3, VASTY2.

```
LOGISTIC REGRESSION VARIABLES hand01
/METHOD=ENTER sv5 VASTY2
/CONTRAST (sv5)=Indicator(1)
/CONTRAST (VASTY2)=Indicator(1)
/PRINT=CI(95)
/CRITERIA=PIN(0.05) POUT(0.10) ITERATE(20) CUT(0.5).
```

Block 1: Method = Enter

Omnibus Tests of Model Coefficients

|        |       | Chi-square | df | Sig. |
|--------|-------|------------|----|------|
| Step 1 | Step  | 558,845    | 39 | ,000 |
|        | Block | 558,845    | 39 | ,000 |
|        | Model | 558,845    | 39 | ,000 |

Model Summary

| Step | -2 Log likelihood    | Cox & Snell R Square | Nagelkerke R Square |
|------|----------------------|----------------------|---------------------|
| 1    | 8064,74 <sup>a</sup> | ,044                 | ,088                |

a. Estimation terminated at iteration number 6 because parameter estimates changed by less than ,001.

Classification Table<sup>a</sup>

| Observed           |                              | Predicted                    |                     |                    |       |
|--------------------|------------------------------|------------------------------|---------------------|--------------------|-------|
|                    |                              | hand01 händelse nej eller ja |                     | Percentage Correct |       |
|                    |                              | 0 ingen händelse             | 1 minst en händelse |                    |       |
| Step 1             | hand01 händelse nej eller ja | 0 ingen händelse             | 11108               | 0                  | 100,0 |
|                    |                              | 1 minst en händelse          | 1367                | 0                  | ,0    |
| Overall Percentage |                              |                              |                     |                    | 89,0  |

a. The cut value is ,500

Variables in the Equation

|                     | B      | S.E. | Wald    | df | Sig. | Exp(B) | 95% C.I. for EXP(B) |       |
|---------------------|--------|------|---------|----|------|--------|---------------------|-------|
|                     |        |      |         |    |      |        | Lower               | Upper |
| Step 1 <sup>a</sup> |        |      |         |    |      |        |                     |       |
| sv5                 |        |      | 20,334  | 4  | ,000 |        |                     |       |
| sv5(1)              | -,231  | ,108 | 4,557   | 1  | ,033 | ,794   | ,642                | ,981  |
| sv5(2)              | -,057  | ,108 | ,279    | 1  | ,597 | ,945   | ,765                | 1,167 |
| sv5(3)              | -,053  | ,100 | ,283    | 1  | ,595 | ,948   | ,780                | 1,153 |
| sv5(4)              | ,269   | ,107 | 6,278   | 1  | ,012 | 1,309  | 1,060               | 1,616 |
| VASTY2              |        |      | 432,108 | 35 | ,000 |        |                     |       |
| VASTY2(1)           | ,291   | ,241 | 1,465   | 1  | ,226 | 1,338  | ,835                | 2,145 |
| VASTY2(2)           | 1,054  | ,221 | 22,667  | 1  | ,000 | 2,869  | 1,859               | 4,427 |
| VASTY2(3)           | -,662  | ,302 | 4,808   | 1  | ,028 | ,516   | ,286                | ,932  |
| VASTY2(4)           | ,316   | ,242 | 1,709   | 1  | ,191 | 1,372  | ,854                | 2,204 |
| VASTY2(5)           | -,250  | ,283 | ,781    | 1  | ,377 | ,779   | ,447                | 1,356 |
| VASTY2(6)           | -,199  | ,334 | 12,908  | 1  | ,000 | ,301   | ,157                | ,580  |
| VASTY2(7)           | 1,262  | ,217 | 33,934  | 1  | ,000 | 3,534  | 2,311               | 5,404 |
| VASTY2(8)           | ,376   | ,241 | 2,443   | 1  | ,118 | 1,456  | ,909                | 2,333 |
| VASTY2(9)           | ,292   | ,245 | 1,414   | 1  | ,234 | 1,339  | ,828                | 2,166 |
| VASTY2(10)          | ,871   | ,226 | 14,883  | 1  | ,000 | 2,389  | 1,535               | 3,720 |
| VASTY2(11)          | ,907   | ,223 | 16,623  | 1  | ,000 | 2,477  | 1,602               | 3,832 |
| VASTY2(12)          | ,008   | ,251 | ,001    | 1  | ,976 | 1,008  | ,616                | 1,647 |
| VASTY2(13)          | ,686   | ,230 | 8,900   | 1  | ,003 | 1,986  | 1,265               | 3,118 |
| VASTY2(14)          | -,336  | ,269 | 1,557   | 1  | ,212 | ,715   | ,422                | 1,211 |
| VASTY2(15)          | ,119   | ,246 | ,235    | 1  | ,628 | 1,127  | ,696                | 1,825 |
| VASTY2(16)          | ,317   | ,289 | 1,200   | 1  | ,273 | 1,373  | ,779                | 2,419 |
| VASTY2(17)          | -,165  | ,356 | 10,728  | 1  | ,001 | ,312   | ,155                | ,626  |
| VASTY2(18)          | -,683  | ,328 | 4,334   | 1  | ,037 | ,505   | ,265                | ,961  |
| VASTY2(19)          | -,1214 | ,390 | 9,669   | 1  | ,002 | ,297   | ,138                | ,638  |
| VASTY2(20)          | ,022   | ,263 | ,007    | 1  | ,933 | 1,022  | ,611                | 1,712 |
| VASTY2(21)          | -,098  | ,263 | ,138    | 1  | ,710 | ,907   | ,542                | 1,518 |
| VASTY2(22)          | ,053   | ,252 | ,045    | 1  | ,832 | 1,055  | ,644                | 1,727 |
| VASTY2(23)          | ,729   | ,228 | 10,258  | 1  | ,001 | 2,073  | 1,327               | 3,239 |

## Variables in the Equation

|            | B      | S.E. | Wald    | df | Sig. | Exp(B) | 95% C.I. for EXP(B) |       |
|------------|--------|------|---------|----|------|--------|---------------------|-------|
|            |        |      |         |    |      |        | Lower               | Upper |
| VASTY2(24) | ,589   | ,229 | 6,595   | 1  | ,010 | 1,803  | 1,150               | 2,826 |
| VASTY2(25) | ,156   | ,265 | ,346    | 1  | ,556 | 1,169  | ,695                | 1,964 |
| VASTY2(26) | -,806  | ,336 | 5,735   | 1  | ,017 | ,447   | ,231                | ,864  |
| VASTY2(27) | -1,343 | ,358 | 14,078  | 1  | ,000 | ,261   | ,129                | ,527  |
| VASTY2(28) | -1,089 | ,378 | 8,296   | 1  | ,004 | ,337   | ,160                | ,706  |
| VASTY2(29) | -1,185 | ,329 | 12,977  | 1  | ,000 | ,306   | ,160                | ,583  |
| VASTY2(30) | ,113   | ,253 | ,200    | 1  | ,655 | 1,119  | ,682                | 1,837 |
| VASTY2(31) | ,693   | ,240 | 8,319   | 1  | ,004 | 1,999  | 1,249               | 3,200 |
| VASTY2(32) | ,130   | ,269 | ,235    | 1  | ,628 | 1,139  | ,672                | 1,931 |
| VASTY2(33) | ,161   | ,268 | ,360    | 1  | ,548 | 1,175  | ,694                | 1,987 |
| VASTY2(34) | -1,523 | ,400 | 14,471  | 1  | ,000 | ,218   | ,099                | ,478  |
| VASTY2(35) | ,477   | ,243 | 3,866   | 1  | ,049 | 1,611  | 1,001               | 2,593 |
| Constant   | -2,232 | ,190 | 138,002 | 1  | ,000 | ,107   |                     |       |

a. Variable(s) entered on step 1: sv5, VASTY2.

```
LOGISTIC REGRESSION VARIABLES hand01
/METHOD=ENTER sv7 VASTY2
/CONTRAST (sv7)=Indicator(1)
/CONTRAST (VASTY2)=Indicator(1)
/PRINT=CI(95)
/CRITERIA=PIN(0.05) POUT(0.10) ITERATE(20) CUT(0.5).
```

**Block 1: Method = Enter****Omnibus Tests of Model Coefficients**

|        |       | Chi-square | df | Sig. |
|--------|-------|------------|----|------|
| Step 1 | Step  | 564,160    | 41 | ,000 |
|        | Block | 564,160    | 41 | ,000 |
|        | Model | 564,160    | 41 | ,000 |

**Model Summary**

| Step | -2 Log likelihood    | Cox & Snell R Square | Nagelkerke R Square |
|------|----------------------|----------------------|---------------------|
| 1    | 8059,42 <sup>a</sup> | ,044                 | ,089                |

a. Estimation terminated at iteration number 6 because parameter estimates changed by less than ,001.

**Classification Table<sup>a</sup>**

| Observed           |                              | Predicted                    |                     |                    |       |
|--------------------|------------------------------|------------------------------|---------------------|--------------------|-------|
|                    |                              | hand01 händelse nej eller ja |                     | Percentage Correct |       |
|                    |                              | 0 ingen händelse             | 1 minst en händelse |                    |       |
| Step 1             | hand01 händelse nej eller ja | 0 ingen händelse             | 11108               | 0                  | 100,0 |
|                    |                              | 1 minst en händelse          | 1367                | 0                  | ,0    |
| Overall Percentage |                              |                              |                     |                    | 89,0  |

a. The cut value is ,500

**Variables in the Equation**

|                     | B      | S.E. | Wald    | df | Sig. | Exp(B) | 95% C.I. for EXP(B) |       |
|---------------------|--------|------|---------|----|------|--------|---------------------|-------|
|                     |        |      |         |    |      |        | Lower               | Upper |
| Step 1 <sup>a</sup> |        |      | 25,503  | 6  | ,000 |        |                     |       |
| sv7                 |        |      |         |    |      |        |                     |       |
| sv7(1)              | -,325  | ,124 | 6,831   | 1  | ,009 | ,723   | ,566                | ,922  |
| sv7(2)              | -,076  | ,126 | ,361    | 1  | ,548 | ,927   | ,723                | 1,188 |
| sv7(3)              | -,121  | ,125 | ,927    | 1  | ,336 | ,886   | ,694                | 1,133 |
| sv7(4)              | -,056  | ,119 | ,224    | 1  | ,636 | ,945   | ,749                | 1,193 |
| sv7(5)              | ,047   | ,112 | ,176    | 1  | ,674 | 1,048  | ,841                | 1,306 |
| sv7(6)              | ,344   | ,125 | 7,528   | 1  | ,006 | 1,410  | 1,103               | 1,803 |
| VASTY2              |        |      | 432,430 | 35 | ,000 |        |                     |       |
| VASTY2(1)           | ,293   | ,241 | 1,484   | 1  | ,223 | 1,341  | ,836                | 2,150 |
| VASTY2(2)           | 1,034  | ,222 | 21,724  | 1  | ,000 | 2,812  | 1,820               | 4,343 |
| VASTY2(3)           | -,668  | ,302 | 4,901   | 1  | ,027 | ,513   | ,284                | ,926  |
| VASTY2(4)           | ,304   | ,242 | 1,574   | 1  | ,210 | 1,355  | ,843                | 2,177 |
| VASTY2(5)           | -,237  | ,283 | ,699    | 1  | ,403 | ,789   | ,453                | 1,374 |
| VASTY2(6)           | -1,270 | ,336 | 14,239  | 1  | ,000 | ,281   | ,145                | ,543  |
| VASTY2(7)           | 1,259  | ,217 | 33,714  | 1  | ,000 | 3,520  | 2,302               | 5,383 |
| VASTY2(8)           | ,377   | ,241 | 2,454   | 1  | ,117 | 1,458  | ,910                | 2,337 |
| VASTY2(9)           | ,283   | ,246 | 1,330   | 1  | ,249 | 1,327  | ,820                | 2,148 |
| VASTY2(10)          | ,847   | ,226 | 13,989  | 1  | ,000 | 2,333  | 1,497               | 3,636 |
| VASTY2(11)          | ,916   | ,223 | 16,906  | 1  | ,000 | 2,499  | 1,615               | 3,868 |

## Variables in the Equation

|            | B      | S.E. | Wald    | df | Sig. | Exp(B) | 95% C.I. for EXP(B) |       |
|------------|--------|------|---------|----|------|--------|---------------------|-------|
|            |        |      |         |    |      |        | Lower               | Upper |
| VASTY2(12) | ,001   | ,251 | ,000    | 1  | ,997 | 1,001  | ,613                | 1,636 |
| VASTY2(13) | ,657   | ,231 | 8,102   | 1  | ,004 | 1,929  | 1,227               | 3,032 |
| VASTY2(14) | -,347  | ,269 | 1,662   | 1  | ,197 | ,707   | ,417                | 1,198 |
| VASTY2(15) | ,094   | ,247 | ,146    | 1  | ,702 | 1,099  | ,677                | 1,783 |
| VASTY2(16) | ,287   | ,290 | ,979    | 1  | ,322 | 1,332  | ,755                | 2,352 |
| VASTY2(17) | -1,169 | ,356 | 10,782  | 1  | ,001 | ,311   | ,155                | ,624  |
| VASTY2(18) | -,619  | ,331 | 3,504   | 1  | ,061 | ,539   | ,282                | 1,030 |
| VASTY2(19) | -1,140 | ,393 | 8,403   | 1  | ,004 | ,320   | ,148                | ,691  |
| VASTY2(20) | -,004  | ,264 | ,000    | 1  | ,986 | ,996   | ,594                | 1,669 |
| VASTY2(21) | -,102  | ,263 | ,151    | 1  | ,698 | ,903   | ,540                | 1,511 |
| VASTY2(22) | ,057   | ,252 | ,052    | 1  | ,820 | 1,059  | ,647                | 1,734 |
| VASTY2(23) | ,734   | ,228 | 10,398  | 1  | ,001 | 2,084  | 1,334               | 3,256 |
| VASTY2(24) | ,584   | ,230 | 6,482   | 1  | ,011 | 1,794  | 1,144               | 2,813 |
| VASTY2(25) | ,164   | ,265 | ,381    | 1  | ,537 | 1,178  | ,701                | 1,980 |
| VASTY2(26) | -,809  | ,337 | 5,781   | 1  | ,016 | ,445   | ,230                | ,861  |
| VASTY2(27) | -1,377 | ,359 | 14,731  | 1  | ,000 | ,252   | ,125                | ,510  |
| VASTY2(28) | -1,174 | ,382 | 9,468   | 1  | ,002 | ,309   | ,146                | ,653  |
| VASTY2(29) | -1,274 | ,333 | 14,612  | 1  | ,000 | ,280   | ,146                | ,538  |
| VASTY2(30) | ,113   | ,253 | ,200    | 1  | ,655 | 1,119  | ,682                | 1,837 |
| VASTY2(31) | ,729   | ,241 | 9,166   | 1  | ,002 | 2,073  | 1,293               | 3,323 |
| VASTY2(32) | ,195   | ,272 | ,514    | 1  | ,473 | 1,215  | ,713                | 2,072 |
| VASTY2(33) | ,235   | ,272 | ,743    | 1  | ,389 | 1,265  | ,742                | 2,157 |
| VASTY2(34) | -1,526 | ,400 | 14,519  | 1  | ,000 | ,217   | ,099                | ,477  |
| VASTY2(35) | ,471   | ,243 | 3,759   | 1  | ,053 | 1,602  | ,995                | 2,578 |
| Constant   | -2,212 | ,194 | 129,865 | 1  | ,000 | ,109   |                     |       |

a. Variable(s) entered on step 1: sv7, VASTY2.

\*\*

```
LOGISTIC REGRESSION VARIABLES luonne1t1
/METHOD=ENTER bv1 VASTY2
/CONTRAST (bv1)=Indicator(1)
/CONTRAST (VASTY2)=Indicator(1)
/PRINT=CI(95)
/CRITERIA=PIN(0.05) POUT(0.10) ITERATE(20) CUT(0.5).
```

**Block 1: Method = Enter**

## Omnibus Tests of Model Coefficients

|        |       | Chi-square | df | Sig. |
|--------|-------|------------|----|------|
| Step 1 | Step  | 320,286    | 37 | ,000 |
|        | Block | 320,286    | 37 | ,000 |
|        | Model | 320,286    | 37 | ,000 |

## Model Summary

| Step | -2 Log likelihood    | Cox & Snell R Square | Nagelkerke R Square |
|------|----------------------|----------------------|---------------------|
| 1    | 5876,59 <sup>a</sup> | ,025                 | ,065                |

a. Estimation terminated at iteration number 7 because parameter estimates changed by less than ,001.

Classification Table<sup>a</sup>

|                    |                                                |                                                              | Predicted                                    |
|--------------------|------------------------------------------------|--------------------------------------------------------------|----------------------------------------------|
|                    |                                                |                                                              | luonnelt1<br>luonne<br>highest = ..          |
| Observed           |                                                |                                                              | 0 ingen<br>händelse<br>eller läheltä<br>piti |
| Step 1             | luonnelt1 luonne highest = tapahtui potilaalle | 0 ingen händelse eller läheltä piti<br>1 tapahtui potilaalle | 11627<br>848                                 |
| Overall Percentage |                                                |                                                              |                                              |

Classification Table<sup>a</sup>

|                    |                                                |                                                              | Predicted                            |
|--------------------|------------------------------------------------|--------------------------------------------------------------|--------------------------------------|
|                    |                                                |                                                              | luonnelt1<br>luonne<br>highest = ... |
| Observed           |                                                |                                                              | 1 tapahtui<br>potilaalle             |
| Step 1             | luonnelt1 luonne highest = tapahtui potilaalle | 0 ingen händelse eller läheltä piti<br>1 tapahtui potilaalle | 0<br>0                               |
| Overall Percentage |                                                |                                                              |                                      |



Classification Table<sup>a</sup>

|                    |                                                |                                                              | Predicted          |
|--------------------|------------------------------------------------|--------------------------------------------------------------|--------------------|
|                    |                                                |                                                              |                    |
| Observed           |                                                |                                                              | Percentage Correct |
| Step 1             | luonnelt1 luonne highest = tapahtui potilaalle | 0 ingen händelse eller läheltä piti<br>1 tapahtui potilaalle | 100,0<br>,0        |
| Overall Percentage |                                                |                                                              | 93,2               |

a. The cut value is ,500

Variables in the Equation

|                     |            | B      | S.E. | Wald    | df | Sig. | Exp(B) | 95% C.I. for EXP(B) |       |
|---------------------|------------|--------|------|---------|----|------|--------|---------------------|-------|
|                     |            |        |      |         |    |      |        | Lower               | Upper |
| Step 1 <sup>a</sup> | bv1        |        |      | 12,580  | 2  | ,002 |        |                     |       |
|                     | bv1(1)     | -,279  | ,102 | 7,512   | 1  | ,006 | ,757   | ,620                | ,924  |
|                     | bv1(2)     | ,105   | ,085 | 1,521   | 1  | ,217 | 1,111  | ,940                | 1,312 |
|                     | VASTY2     |        |      | 236,395 | 35 | ,000 |        |                     |       |
|                     | VASTY2(1)  | ,094   | ,299 | ,099    | 1  | ,752 | 1,099  | ,611                | 1,975 |
|                     | VASTY2(2)  | ,538   | ,274 | 3,849   | 1  | ,050 | 1,713  | 1,000               | 2,934 |
|                     | VASTY2(3)  | -1,507 | ,466 | 10,436  | 1  | ,001 | ,222   | ,089                | ,553  |
|                     | VASTY2(4)  | ,124   | ,294 | ,178    | 1  | ,673 | 1,132  | ,637                | 2,013 |
|                     | VASTY2(5)  | -,192  | ,325 | ,350    | 1  | ,554 | ,825   | ,436                | 1,560 |
|                     | VASTY2(6)  | -1,298 | ,439 | 8,730   | 1  | ,003 | ,273   | ,115                | ,646  |
|                     | VASTY2(7)  | ,529   | ,276 | 3,672   | 1  | ,055 | 1,698  | ,988                | 2,917 |
|                     | VASTY2(8)  | -,265  | ,320 | ,686    | 1  | ,407 | ,767   | ,410                | 1,436 |
|                     | VASTY2(9)  | ,262   | ,291 | ,810    | 1  | ,368 | 1,299  | ,735                | 2,299 |
|                     | VASTY2(10) | 1,014  | ,258 | 15,416  | 1  | ,000 | 2,756  | 1,662               | 4,572 |
|                     | VASTY2(11) | ,615   | ,272 | 5,094   | 1  | ,024 | 1,849  | 1,084               | 3,153 |
|                     | VASTY2(12) | ,115   | ,295 | ,153    | 1  | ,695 | 1,122  | ,630                | 1,999 |
|                     | VASTY2(13) | ,966   | ,260 | 13,812  | 1  | ,000 | 2,628  | 1,579               | 4,374 |
|                     | VASTY2(14) | -,257  | ,320 | ,646    | 1  | ,422 | ,773   | ,413                | 1,448 |
|                     | VASTY2(15) | ,244   | ,288 | ,719    | 1  | ,396 | 1,277  | ,726                | 2,246 |
|                     | VASTY2(16) | ,515   | ,330 | 2,437   | 1  | ,119 | 1,674  | ,877                | 3,196 |
|                     | VASTY2(17) | -1,073 | ,418 | 6,592   | 1  | ,010 | ,342   | ,151                | ,776  |
|                     | VASTY2(18) | -,668  | ,365 | 3,357   | 1  | ,067 | ,513   | ,251                | 1,048 |
|                     | VASTY2(19) | -1,610 | ,551 | 8,547   | 1  | ,003 | ,200   | ,068                | ,588  |
|                     | VASTY2(20) | ,066   | ,314 | ,045    | 1  | ,832 | 1,069  | ,578                | 1,977 |
|                     | VASTY2(21) | -,127  | ,312 | ,167    | 1  | ,683 | ,880   | ,478                | 1,622 |
|                     | VASTY2(22) | ,328   | ,291 | 1,275   | 1  | ,259 | 1,388  | ,786                | 2,454 |
|                     | VASTY2(23) | ,308   | ,288 | 1,142   | 1  | ,285 | 1,360  | ,774                | 2,392 |

## Variables in the Equation

|            | B      | S.E. | Wald    | df | Sig. | Exp(B) | 95% C.I. for EXP(B) |       |
|------------|--------|------|---------|----|------|--------|---------------------|-------|
|            |        |      |         |    |      |        | Lower               | Upper |
| VASTY2(24) | ,264   | ,286 | ,857    | 1  | ,355 | 1,303  | ,744                | 2,281 |
| VASTY2(25) | ,346   | ,300 | 1,323   | 1  | ,250 | 1,413  | ,784                | 2,546 |
| VASTY2(26) | -,909  | ,419 | 4,711   | 1  | ,030 | ,403   | ,177                | ,916  |
| VASTY2(27) | -1,454 | ,466 | 9,752   | 1  | ,002 | ,234   | ,094                | ,582  |
| VASTY2(28) | -,988  | ,467 | 4,473   | 1  | ,034 | ,372   | ,149                | ,930  |
| VASTY2(29) | -1,026 | ,401 | 6,552   | 1  | ,010 | ,359   | ,163                | ,786  |
| VASTY2(30) | -,190  | ,315 | ,364    | 1  | ,546 | ,827   | ,445                | 1,534 |
| VASTY2(31) | ,520   | ,278 | 3,496   | 1  | ,062 | 1,681  | ,975                | 2,899 |
| VASTY2(32) | -,035  | ,313 | ,012    | 1  | ,912 | ,966   | ,523                | 1,783 |
| VASTY2(33) | ,035   | ,305 | ,013    | 1  | ,909 | 1,035  | ,569                | 1,884 |
| VASTY2(34) | -1,255 | ,438 | 8,197   | 1  | ,004 | ,285   | ,121                | ,673  |
| VASTY2(35) | ,668   | ,278 | 5,783   | 1  | ,016 | 1,951  | 1,132               | 3,363 |
| Constant   | -2,639 | ,218 | 146,911 | 1  | ,000 | ,071   |                     |       |

a. Variable(s) entered on step 1: bv1, VASTY2.

```
LOGISTIC REGRESSION VARIABLES luonnelt1
/METHOD=ENTER bv2 VASTY2
/CONTRAST (bv2)=Indicator(1)
/CONTRAST (VASTY2)=Indicator(1)
/PRINT=CI(95)
/CRITERIA=PIN(0.05) POUT(0.10) ITERATE(20) CUT(0.5).
```

**Block 1: Method = Enter****Omnibus Tests of Model Coefficients**

|        |       | Chi-square | df | Sig. |
|--------|-------|------------|----|------|
| Step 1 | Step  | 316,220    | 37 | ,000 |
|        | Block | 316,220    | 37 | ,000 |
|        | Model | 316,220    | 37 | ,000 |

**Model Summary**

| Step | -2 Log likelihood    | Cox & Snell R Square | Nagelkerke R Square |
|------|----------------------|----------------------|---------------------|
| 1    | 5880,65 <sup>a</sup> | ,025                 | ,064                |

a. Estimation terminated at iteration number 7 because parameter estimates changed by less than ,001.

**Classification Table<sup>a</sup>**

|                    |                                                | Predicted                                                    |              |
|--------------------|------------------------------------------------|--------------------------------------------------------------|--------------|
|                    |                                                | luonnelt1 luonne highest = ...                               |              |
| Observed           |                                                | 0 ingen händelse eller läheltä piti                          |              |
| Step 1             | luonnelt1 luonne highest = tapahtui potilaalle | 0 ingen händelse eller läheltä piti<br>1 tapahtui potilaalle | 11627<br>848 |
| Overall Percentage |                                                |                                                              |              |

**Classification Table<sup>a</sup>**

|                    |                                                | Predicted                                                    |        |
|--------------------|------------------------------------------------|--------------------------------------------------------------|--------|
|                    |                                                | luonnelt1 luonne highest = ...                               |        |
| Observed           |                                                | 1 tapahtui potilaalle                                        |        |
| Step 1             | luonnelt1 luonne highest = tapahtui potilaalle | 0 ingen händelse eller läheltä piti<br>1 tapahtui potilaalle | 0<br>0 |
| Overall Percentage |                                                |                                                              |        |

Classification Table<sup>a</sup>

|                    |                                                |                                                              | Predicted          |
|--------------------|------------------------------------------------|--------------------------------------------------------------|--------------------|
| Observed           |                                                |                                                              | Percentage Correct |
| Step 1             | luonnelt1 luonne highest = tapahtui potilaalle | 0 ingen händelse eller läheltä piti<br>1 tapahtui potilaalle | 100,0<br>,0        |
| Overall Percentage |                                                |                                                              | 93,2               |

a. The cut value is ,500

Variables in the Equation

|                         | B          | S.E.   | Wald    | df     | Sig. | Exp(B) | 95% C.I. for EXP(B) |             |
|-------------------------|------------|--------|---------|--------|------|--------|---------------------|-------------|
|                         |            |        |         |        |      |        | Lower               | Upper       |
| Step 1 <sup>a</sup> bv2 |            |        | 8,836   | 2      | ,012 |        |                     |             |
|                         | bv2(1)     | ,178   | ,103    | 3,024  | 1    | ,082   | ,837                | ,684 1,023  |
|                         | bv2(2)     | ,092   | ,094    | ,963   | 1    | ,326   | 1,097               | ,912 1,318  |
|                         | VASTY2     |        | 238,156 | 35     | ,000 |        |                     |             |
|                         | VASTY2(1)  | ,083   | ,299    | ,077   | 1    | ,781   | 1,087               | ,605 1,953  |
|                         | VASTY2(2)  | ,540   | ,274    | 3,877  | 1    | ,049   | 1,717               | 1,002 2,940 |
|                         | VASTY2(3)  | -1,490 | ,466    | 10,218 | 1    | ,001   | ,225                | ,090 ,562   |
|                         | VASTY2(4)  | ,133   | ,293    | ,205   | 1    | ,651   | 1,142               | ,643 2,029  |
|                         | VASTY2(5)  | -,194  | ,325    | ,356   | 1    | ,551   | ,824                | ,436 1,557  |
|                         | VASTY2(6)  | -1,289 | ,439    | 8,622  | 1    | ,003   | ,276                | ,117 ,651   |
|                         | VASTY2(7)  | ,539   | ,275    | 3,839  | 1    | ,050   | 1,714               | 1,000 2,940 |
|                         | VASTY2(8)  | -,263  | ,320    | ,677   | 1    | ,411   | ,768                | ,410 1,439  |
|                         | VASTY2(9)  | ,261   | ,291    | ,805   | 1    | ,370   | 1,298               | ,734 2,297  |
|                         | VASTY2(10) | 1,022  | ,258    | 15,652 | 1    | ,000   | 2,778               | 1,675 4,608 |
|                         | VASTY2(11) | ,614   | ,272    | 5,092  | 1    | ,024   | 1,848               | 1,084 3,149 |
|                         | VASTY2(12) | ,120   | ,295    | ,166   | 1    | ,684   | 1,128               | ,633 2,008  |
|                         | VASTY2(13) | ,971   | ,260    | 13,951 | 1    | ,000   | 2,642               | 1,587 4,398 |
|                         | VASTY2(14) | -,258  | ,320    | ,650   | 1    | ,420   | ,773                | ,413 1,447  |
|                         | VASTY2(15) | ,240   | ,288    | ,696   | 1    | ,404   | 1,272               | ,723 2,237  |
|                         | VASTY2(16) | ,509   | ,330    | 2,390  | 1    | ,122   | 1,664               | ,872 3,175  |
|                         | VASTY2(17) | -1,076 | ,418    | 6,639  | 1    | ,010   | ,341                | ,150 ,773   |
|                         | VASTY2(18) | -,677  | ,364    | 3,445  | 1    | ,063   | ,508                | ,249 1,039  |
|                         | VASTY2(19) | -1,680 | ,549    | 9,351  | 1    | ,002   | ,186                | ,064 ,547   |
|                         | VASTY2(20) | ,071   | ,314    | ,052   | 1    | ,820   | 1,074               | ,581 1,985  |
|                         | VASTY2(21) | -,126  | ,312    | ,164   | 1    | ,685   | ,881                | ,478 1,624  |
|                         | VASTY2(22) | ,322   | ,291    | 1,227  | 1    | ,268   | 1,380               | ,780 2,440  |
|                         | VASTY2(23) | ,298   | ,288    | 1,069  | 1    | ,301   | 1,347               | ,766 2,367  |

## Variables in the Equation

|            | B      | S.E. | Wald    | df | Sig. | Exp(B) | 95% C.I. for EXP(B) |       |
|------------|--------|------|---------|----|------|--------|---------------------|-------|
|            |        |      |         |    |      |        | Lower               | Upper |
| VASTY2(24) | ,280   | ,286 | ,958    | 1  | ,328 | 1,322  | ,756                | 2,315 |
| VASTY2(25) | ,347   | ,300 | 1,337   | 1  | ,248 | 1,415  | ,785                | 2,550 |
| VASTY2(26) | -,913  | ,419 | 4,751   | 1  | ,029 | ,401   | ,177                | ,912  |
| VASTY2(27) | -1,455 | ,465 | 9,774   | 1  | ,002 | ,233   | ,094                | ,581  |
| VASTY2(28) | -,986  | ,467 | 4,448   | 1  | ,035 | ,373   | ,149                | ,933  |
| VASTY2(29) | -1,016 | ,401 | 6,424   | 1  | ,011 | ,362   | ,165                | ,794  |
| VASTY2(30) | -,182  | ,315 | ,333    | 1  | ,564 | ,834   | ,449                | 1,547 |
| VASTY2(31) | ,508   | ,277 | 3,352   | 1  | ,067 | 1,662  | ,965                | 2,862 |
| VASTY2(32) | -,056  | ,312 | ,033    | 1  | ,857 | ,945   | ,513                | 1,742 |
| VASTY2(33) | ,020   | ,305 | ,004    | 1  | ,948 | 1,020  | ,561                | 1,855 |
| VASTY2(34) | -1,251 | ,438 | 8,136   | 1  | ,004 | ,286   | ,121                | ,676  |
| VASTY2(35) | ,677   | ,277 | 5,975   | 1  | ,015 | 1,968  | 1,144               | 3,387 |
| Constant   | -2,650 | ,223 | 140,917 | 1  | ,000 | ,071   |                     |       |

a. Variable(s) entered on step 1: bv2, VASTY2.

```
LOGISTIC REGRESSION VARIABLES luonnel1
/METHOD=ENTER bv3 VASTY2
/CONTRAST (bv3)=Indicator(1)
/CONTRAST (VASTY2)=Indicator(1)
/PRINT=CI(95)
/CRITERIA=PIN(0.05) POUT(0.10) ITERATE(20) CUT(0.5).
```

**Block 1: Method = Enter****Omnibus Tests of Model Coefficients**

|        |       | Chi-square | df | Sig. |
|--------|-------|------------|----|------|
| Step 1 | Step  | 316,969    | 37 | ,000 |
|        | Block | 316,969    | 37 | ,000 |
|        | Model | 316,969    | 37 | ,000 |

**Model Summary**

| Step | -2 Log likelihood    | Cox & Snell R Square | Nagelkerke R Square |
|------|----------------------|----------------------|---------------------|
| 1    | 5879,90 <sup>a</sup> | ,025                 | ,064                |

a. Estimation terminated at iteration number 7 because parameter estimates changed by less than ,001.

**Classification Table<sup>a</sup>**

|                    |                                                   |                                                              | Predicted<br>luonnelt1<br>luonne<br>highest = ... |
|--------------------|---------------------------------------------------|--------------------------------------------------------------|---------------------------------------------------|
| Observed           |                                                   |                                                              | 0 ingen<br>händelse<br>eller läheltä<br>piti      |
| Step 1             | luonnelt1 luonne highest = tapahtui<br>potilaalle | 0 ingen händelse eller läheltä piti<br>1 tapahtui potilaalle | 11627<br>848                                      |
| Overall Percentage |                                                   |                                                              |                                                   |

**Classification Table<sup>a</sup>**

|                    |                                                   |                                                              | Predicted<br>luonnelt1<br>luonne<br>highest = ... |
|--------------------|---------------------------------------------------|--------------------------------------------------------------|---------------------------------------------------|
| Observed           |                                                   |                                                              | 1 tapahtui<br>potilaalle                          |
| Step 1             | luonnelt1 luonne highest = tapahtui<br>potilaalle | 0 ingen händelse eller läheltä piti<br>1 tapahtui potilaalle | 0<br>0                                            |
| Overall Percentage |                                                   |                                                              |                                                   |

Classification Table<sup>a</sup>

|                    |                                                |                                                              | Predicted          |
|--------------------|------------------------------------------------|--------------------------------------------------------------|--------------------|
|                    |                                                |                                                              |                    |
| Observed           |                                                |                                                              | Percentage Correct |
| Step 1             | luonnelt1 luonne highest = tapahtui potilaalle | 0 ingen händelse eller läheltä piti<br>1 tapahtui potilaalle | 100,0<br>,0        |
| Overall Percentage |                                                |                                                              | 93,2               |

a. The cut value is ,500

Variables in the Equation

|                     |            | B      | S.E. | Wald    | df | Sig. | Exp(B) | 95% C.I. for EXP(B) |       |
|---------------------|------------|--------|------|---------|----|------|--------|---------------------|-------|
|                     |            |        |      |         |    |      |        | Lower               | Upper |
| Step 1 <sup>a</sup> | bv3        |        |      | 9,244   | 2  | ,010 |        |                     |       |
|                     | bv3(1)     | -,346  | ,140 | 6,122   | 1  | ,013 | ,708   | ,538                | ,931  |
|                     | bv3(2)     | ,147   | ,103 | 2,035   | 1  | ,154 | 1,158  | ,947                | 1,417 |
|                     | VASTY2     |        |      | 240,353 | 35 | ,000 |        |                     |       |
|                     | VASTY2(1)  | ,122   | ,299 | ,165    | 1  | ,684 | 1,129  | ,628                | 2,030 |
|                     | VASTY2(2)  | ,564   | ,274 | 4,233   | 1  | ,040 | 1,758  | 1,027               | 3,008 |
|                     | VASTY2(3)  | -1,468 | ,466 | 9,921   | 1  | ,002 | ,230   | ,092                | ,574  |
|                     | VASTY2(4)  | ,150   | ,293 | ,262    | 1  | ,609 | 1,162  | ,654                | 2,066 |
|                     | VASTY2(5)  | -,170  | ,325 | ,275    | 1  | ,600 | ,844   | ,446                | 1,594 |
|                     | VASTY2(6)  | -1,276 | ,439 | 8,434   | 1  | ,004 | ,279   | ,118                | ,660  |
|                     | VASTY2(7)  | ,545   | ,278 | 3,842   | 1  | ,050 | 1,725  | 1,000               | 2,975 |
|                     | VASTY2(8)  | -,230  | ,320 | ,518    | 1  | ,472 | ,795   | ,425                | 1,486 |
|                     | VASTY2(9)  | ,294   | ,291 | 1,026   | 1  | ,311 | 1,342  | ,759                | 2,372 |
|                     | VASTY2(10) | 1,047  | ,258 | 16,512  | 1  | ,000 | 2,850  | 1,720               | 4,724 |
|                     | VASTY2(11) | ,632   | ,272 | 5,388   | 1  | ,020 | 1,881  | 1,103               | 3,206 |
|                     | VASTY2(12) | ,150   | ,294 | ,260    | 1  | ,610 | 1,162  | ,653                | 2,067 |
|                     | VASTY2(13) | 1,023  | ,258 | 15,658  | 1  | ,000 | 2,781  | 1,676               | 4,615 |
|                     | VASTY2(14) | -,228  | ,320 | ,509    | 1  | ,475 | ,796   | ,425                | 1,490 |
|                     | VASTY2(15) | ,270   | ,288 | ,882    | 1  | ,348 | 1,310  | ,745                | 2,303 |
|                     | VASTY2(16) | ,514   | ,331 | 2,418   | 1  | ,120 | 1,673  | ,875                | 3,200 |
|                     | VASTY2(17) | -1,086 | ,418 | 6,766   | 1  | ,009 | ,337   | ,149                | ,765  |
|                     | VASTY2(18) | -,669  | ,365 | 3,366   | 1  | ,067 | ,512   | ,251                | 1,047 |
|                     | VASTY2(19) | -1,599 | ,552 | 8,382   | 1  | ,004 | ,202   | ,068                | ,596  |
|                     | VASTY2(20) | ,087   | ,314 | ,077    | 1  | ,781 | 1,091  | ,590                | 2,020 |
|                     | VASTY2(21) | -,111  | ,312 | ,127    | 1  | ,721 | ,895   | ,486                | 1,648 |
|                     | VASTY2(22) | ,287   | ,290 | ,981    | 1  | ,322 | 1,333  | ,755                | 2,353 |
|                     | VASTY2(23) | ,308   | ,288 | 1,145   | 1  | ,285 | 1,361  | ,774                | 2,392 |

## Variables in the Equation

|            | B      | S.E. | Wald    | df | Sig. | Exp(B) | 95% C.I. for EXP(B) |       |
|------------|--------|------|---------|----|------|--------|---------------------|-------|
|            |        |      |         |    |      |        | Lower               | Upper |
| VASTY2(24) | ,293   | ,286 | 1,052   | 1  | ,305 | 1,340  | ,766                | 2,346 |
| VASTY2(25) | ,362   | ,301 | 1,450   | 1  | ,229 | 1,436  | ,797                | 2,589 |
| VASTY2(26) | -,881  | ,419 | 4,428   | 1  | ,035 | ,414   | ,182                | ,941  |
| VASTY2(27) | -1,419 | ,465 | 9,305   | 1  | ,002 | ,242   | ,097                | ,602  |
| VASTY2(28) | -,936  | ,467 | 4,025   | 1  | ,045 | ,392   | ,157                | ,979  |
| VASTY2(29) | -1,011 | ,401 | 6,376   | 1  | ,012 | ,364   | ,166                | ,797  |
| VASTY2(30) | -,184  | ,315 | ,341    | 1  | ,559 | ,832   | ,448                | 1,543 |
| VASTY2(31) | ,543   | ,279 | 3,785   | 1  | ,052 | 1,721  | ,996                | 2,973 |
| VASTY2(32) | -,014  | ,314 | ,002    | 1  | ,965 | ,986   | ,533                | 1,825 |
| VASTY2(33) | ,062   | ,306 | ,041    | 1  | ,839 | 1,064  | ,584                | 1,939 |
| VASTY2(34) | -1,244 | ,438 | 8,054   | 1  | ,005 | ,288   | ,122                | ,681  |
| VASTY2(35) | ,687   | ,278 | 6,082   | 1  | ,014 | 1,987  | 1,151               | 3,430 |
| Constant   | -2,676 | ,216 | 154,004 | 1  | ,000 | ,069   |                     |       |

a. Variable(s) entered on step 1: bv3, VASTY2.

## Block 1: Method = Enter

## Omnibus Tests of Model Coefficients

|        |       | Chi-square | df | Sig. |
|--------|-------|------------|----|------|
| Step 1 | Step  | 311,201    | 37 | ,000 |
|        | Block | 311,201    | 37 | ,000 |
|        | Model | 311,201    | 37 | ,000 |

## Model Summary

| Step | -2 Log likelihood    | Cox & Snell R Square | Nagelkerke R Square |
|------|----------------------|----------------------|---------------------|
| 1    | 5885,67 <sup>a</sup> | ,025                 | ,063                |

a. Estimation terminated at iteration number 7 because parameter estimates changed by less than ,001.



1  
2  
3  
4  
5  
6  
7  
8  
9  
10  
11  
12  
13  
14  
15  
16  
17  
18  
19  
20  
21  
22  
23  
24  
25  
26  
27  
28  
29  
30  
31  
32  
33  
34  
35  
36  
37  
38  
39  
40  
41  
42  
43  
44  
45  
46  
47  
48  
49  
50  
51  
52  
53  
54  
55  
56  
57  
58  
59  
60

**Classification Table<sup>a</sup>**

| Observed           |                                                |                                                              | Predicted                            |
|--------------------|------------------------------------------------|--------------------------------------------------------------|--------------------------------------|
|                    |                                                |                                                              | luonnelt1<br>luonne<br>highest = ... |
| Step 1             | luonnelt1 luonne highest = tapahtui potilaalle | 0 ingen händelse eller läheltä piti<br>1 tapahtui potilaalle | 11627<br>848                         |
| Overall Percentage |                                                |                                                              |                                      |

**Classification Table<sup>a</sup>**

| Observed           |                                                |                                                              | Predicted                            |
|--------------------|------------------------------------------------|--------------------------------------------------------------|--------------------------------------|
|                    |                                                |                                                              | luonnelt1<br>luonne<br>highest = ... |
| Step 1             | luonnelt1 luonne highest = tapahtui potilaalle | 0 ingen händelse eller läheltä piti<br>1 tapahtui potilaalle | 0<br>0                               |
| Overall Percentage |                                                |                                                              |                                      |

**Classification Table<sup>a</sup>**

| Observed           |                                                |                                                              | Predicted             |
|--------------------|------------------------------------------------|--------------------------------------------------------------|-----------------------|
|                    |                                                |                                                              | Percentage<br>Correct |
| Step 1             | luonnelt1 luonne highest = tapahtui potilaalle | 0 ingen händelse eller läheltä piti<br>1 tapahtui potilaalle | 100,0<br>,0           |
| Overall Percentage |                                                |                                                              | 93,2                  |

a. The cut value is ,500

## Variables in the Equation

|                     | B      | S.E. | Wald    | df | Sig. | Exp(B) | 95% C.I. for EXP(B) |       |
|---------------------|--------|------|---------|----|------|--------|---------------------|-------|
|                     |        |      |         |    |      |        | Lower               | Upper |
| Step 1 <sup>a</sup> |        |      |         |    |      |        |                     |       |
| sv3                 |        |      | 3,981   | 2  | ,137 |        |                     |       |
| sv3(1)              | -,060  | ,106 | ,325    | 1  | ,569 | ,941   | ,765                | 1,158 |
| sv3(2)              | ,154   | ,103 | 2,238   | 1  | ,135 | 1,166  | ,953                | 1,427 |
| VASTY2              |        |      | 231,303 | 35 | ,000 |        |                     |       |
| VASTY2(1)           | ,058   | ,300 | ,038    | 1  | ,846 | 1,060  | ,589                | 1,908 |
| VASTY2(2)           | ,488   | ,278 | 3,079   | 1  | ,079 | 1,628  | ,945                | 2,807 |
| VASTY2(3)           | -1,367 | ,465 | 8,655   | 1  | ,003 | ,255   | ,102                | ,634  |
| VASTY2(4)           | ,225   | ,292 | ,596    | 1  | ,440 | 1,253  | ,707                | 2,221 |
| VASTY2(5)           | -,101  | ,326 | ,095    | 1  | ,758 | ,904   | ,477                | 1,714 |
| VASTY2(6)           | -1,344 | ,442 | 9,235   | 1  | ,002 | ,261   | ,110                | ,621  |
| VASTY2(7)           | ,662   | ,272 | 5,921   | 1  | ,015 | 1,939  | 1,138               | 3,306 |
| VASTY2(8)           | -,160  | ,320 | ,250    | 1  | ,617 | ,852   | ,455                | 1,596 |
| VASTY2(9)           | ,321   | ,290 | 1,228   | 1  | ,268 | 1,379  | ,781                | 2,435 |
| VASTY2(10)          | ,968   | ,263 | 13,515  | 1  | ,000 | 2,632  | 1,571               | 4,410 |
| VASTY2(11)          | ,634   | ,272 | 5,443   | 1  | ,020 | 1,886  | 1,107               | 3,214 |
| VASTY2(12)          | ,087   | ,297 | ,086    | 1  | ,769 | 1,091  | ,609                | 1,954 |
| VASTY2(13)          | ,962   | ,264 | 13,267  | 1  | ,000 | 2,616  | 1,559               | 4,388 |
| VASTY2(14)          | -,266  | ,321 | ,687    | 1  | ,407 | ,766   | ,408                | 1,438 |
| VASTY2(15)          | ,196   | ,292 | ,452    | 1  | ,501 | 1,217  | ,687                | 2,154 |
| VASTY2(16)          | ,501   | ,330 | 2,305   | 1  | ,129 | 1,650  | ,864                | 3,151 |
| VASTY2(17)          | -1,075 | ,418 | 6,615   | 1  | ,010 | ,341   | ,150                | ,774  |
| VASTY2(18)          | -,590  | ,371 | 2,526   | 1  | ,112 | ,555   | ,268                | 1,147 |
| VASTY2(19)          | -1,719 | ,552 | 9,710   | 1  | ,002 | ,179   | ,061                | ,529  |
| VASTY2(20)          | ,061   | ,314 | ,037    | 1  | ,847 | 1,063  | ,574                | 1,967 |
| VASTY2(21)          | -,067  | ,312 | ,046    | 1  | ,829 | ,935   | ,507                | 1,723 |
| VASTY2(22)          | ,247   | ,290 | ,729    | 1  | ,393 | 1,281  | ,726                | 2,259 |
| VASTY2(23)          | ,303   | ,288 | 1,104   | 1  | ,293 | 1,353  | ,770                | 2,379 |
| VASTY2(24)          | ,316   | ,285 | 1,230   | 1  | ,267 | 1,371  | ,785                | 2,396 |
| VASTY2(25)          | ,377   | ,301 | 1,567   | 1  | ,211 | 1,458  | ,808                | 2,632 |
| VASTY2(26)          | -,881  | ,418 | 4,429   | 1  | ,035 | ,415   | ,183                | ,941  |
| VASTY2(27)          | -1,469 | ,466 | 9,917   | 1  | ,002 | ,230   | ,092                | ,574  |
| VASTY2(28)          | -1,024 | ,471 | 4,721   | 1  | ,030 | ,359   | ,143                | ,905  |
| VASTY2(29)          | -1,110 | ,406 | 7,480   | 1  | ,006 | ,329   | ,149                | ,730  |
| VASTY2(30)          | -,112  | ,316 | ,126    | 1  | ,723 | ,894   | ,481                | 1,661 |
| VASTY2(31)          | ,591   | ,283 | 4,348   | 1  | ,037 | 1,806  | 1,036               | 3,147 |
| VASTY2(32)          | ,002   | ,319 | ,000    | 1  | ,994 | 1,002  | ,536                | 1,875 |
| VASTY2(33)          | ,090   | ,313 | ,083    | 1  | ,773 | 1,095  | ,593                | 2,021 |
| VASTY2(34)          | -1,232 | ,438 | 7,897   | 1  | ,005 | ,292   | ,124                | ,689  |
| VASTY2(35)          | ,722   | ,276 | 6,854   | 1  | ,009 | 2,059  | 1,199               | 3,536 |
| Constant            | -2,724 | ,221 | 152,364 | 1  | ,000 | ,066   |                     |       |

a. Variable(s) entered on step 1: sv3, VASTY2.

```

LOGISTIC REGRESSION VARIABLES luonnelt1
/METHOD=ENTER sv5 VASTY2
/CONTRAST (sv5)=Indicator(1)
/CONTRAST (VASTY2)=Indicator(1)
/PRINT=CI(95)
/CRITERIA=PIN(0.05) POUT(0.10) ITERATE(20) CUT(0.5).
    
```

**Block 1: Method = Enter**

**Omnibus Tests of Model Coefficients**

|        |       | Chi-square | df | Sig. |
|--------|-------|------------|----|------|
| Step 1 | Step  | 312,321    | 39 | ,000 |
|        | Block | 312,321    | 39 | ,000 |
|        | Model | 312,321    | 39 | ,000 |

**Model Summary**

| Step | -2 Log likelihood    | Cox & Snell R Square | Nagelkerke R Square |
|------|----------------------|----------------------|---------------------|
| 1    | 5884,55 <sup>a</sup> | ,025                 | ,063                |

a. Estimation terminated at iteration number 7 because parameter estimates changed by less than ,001.

**Classification Table<sup>a</sup>**

|                    |                                                | Predicted                                                    |                                              |
|--------------------|------------------------------------------------|--------------------------------------------------------------|----------------------------------------------|
|                    |                                                | luonnelt1<br>luonne<br>highest = .                           | 0 ingen<br>händelse<br>eller läheltä<br>piti |
| Observed           |                                                |                                                              |                                              |
| Step 1             | luonnelt1 luonne highest = tapahtui potilaalle | 0 ingen händelse eller läheltä piti<br>1 tapahtui potilaalle | 11627<br>848                                 |
| Overall Percentage |                                                |                                                              |                                              |

Classification Table<sup>a</sup>

|                    |                                                   |                                                              | Predicted                            |
|--------------------|---------------------------------------------------|--------------------------------------------------------------|--------------------------------------|
|                    |                                                   |                                                              | luonnelt1<br>luonne<br>highest = ... |
| Observed           |                                                   |                                                              | 1 tapahtui<br>potilaalle             |
| Step 1             | luonnelt1 luonne highest = tapahtui<br>potilaalle | 0 ingen händelse eller läheltä piti<br>1 tapahtui potilaalle | 0<br>0                               |
| Overall Percentage |                                                   |                                                              |                                      |

Classification Table<sup>a</sup>

|                    |                                                   |                                                              | Predicted             |
|--------------------|---------------------------------------------------|--------------------------------------------------------------|-----------------------|
|                    |                                                   |                                                              | Percentage<br>Correct |
| Step 1             | luonnelt1 luonne highest = tapahtui<br>potilaalle | 0 ingen händelse eller läheltä piti<br>1 tapahtui potilaalle | 100,0<br>,0           |
| Overall Percentage |                                                   |                                                              | 93,2                  |

a. The cut value is ,500

Variables in the Equation

|                     | B      | S.E. | Wald    | df | Sig. | Exp(B) | 95% C.I. for EXP(B) |       |
|---------------------|--------|------|---------|----|------|--------|---------------------|-------|
|                     |        |      |         |    |      |        | Lower               | Upper |
| Step 1 <sup>a</sup> |        |      |         |    |      |        |                     |       |
| sv5                 |        |      | 5,125   | 4  | ,275 |        |                     |       |
| sv5(1)              | -,090  | ,133 | ,453    | 1  | ,501 | ,914   | ,704                | 1,187 |
| sv5(2)              | -,027  | ,136 | ,040    | 1  | ,842 | ,973   | ,746                | 1,271 |
| sv5(3)              | ,009   | ,124 | ,005    | 1  | ,944 | 1,009  | ,791                | 1,287 |
| sv5(4)              | ,207   | ,133 | 2,422   | 1  | ,120 | 1,230  | ,948                | 1,598 |
| VASTY2              |        |      | 231,791 | 35 | ,000 |        |                     |       |
| VASTY2(1)           | ,055   | ,300 | ,034    | 1  | ,854 | 1,057  | ,587                | 1,903 |
| VASTY2(2)           | ,454   | ,280 | 2,626   | 1  | ,105 | 1,575  | ,909                | 2,728 |
| VASTY2(3)           | -1,378 | ,465 | 8,785   | 1  | ,003 | ,252   | ,101                | ,627  |
| VASTY2(4)           | ,225   | ,292 | ,594    | 1  | ,441 | 1,252  | ,707                | 2,220 |
| VASTY2(5)           | -,116  | ,326 | ,126    | 1  | ,722 | ,890   | ,470                | 1,688 |
| VASTY2(6)           | -1,405 | ,446 | 9,928   | 1  | ,002 | ,245   | ,102                | ,588  |
| VASTY2(7)           | ,659   | ,272 | 5,868   | 1  | ,015 | 1,933  | 1,134               | 3,296 |
| VASTY2(8)           | -,176  | ,320 | ,302    | 1  | ,583 | ,839   | ,448                | 1,572 |
| VASTY2(9)           | ,325   | ,290 | 1,256   | 1  | ,263 | 1,384  | ,784                | 2,444 |
| VASTY2(10)          | ,929   | ,267 | 12,153  | 1  | ,000 | 2,532  | 1,502               | 4,270 |
| VASTY2(11)          | ,629   | ,272 | 5,343   | 1  | ,021 | 1,875  | 1,100               | 3,196 |
| VASTY2(12)          | ,074   | ,298 | ,062    | 1  | ,804 | 1,077  | ,601                | 1,931 |
| VASTY2(13)          | ,923   | ,267 | 11,931  | 1  | ,001 | 2,518  | 1,491               | 4,252 |
| VASTY2(14)          | -,286  | ,322 | ,790    | 1  | ,374 | ,751   | ,400                | 1,412 |
| VASTY2(15)          | ,171   | ,293 | ,342    | 1  | ,559 | 1,187  | ,668                | 2,108 |
| VASTY2(16)          | ,476   | ,331 | 2,065   | 1  | ,151 | 1,609  | ,841                | 3,079 |
| VASTY2(17)          | -1,084 | ,418 | 6,723   | 1  | ,010 | ,338   | ,149                | ,768  |
| VASTY2(18)          | -,589  | ,375 | 2,465   | 1  | ,116 | ,555   | ,266                | 1,158 |
| VASTY2(19)          | -1,717 | ,555 | 9,571   | 1  | ,002 | ,180   | ,061                | ,533  |
| VASTY2(20)          | ,028   | ,316 | ,008    | 1  | ,929 | 1,029  | ,554                | 1,911 |
| VASTY2(21)          | -,076  | ,312 | ,059    | 1  | ,807 | ,927   | ,503                | 1,708 |
| VASTY2(22)          | ,244   | ,290 | ,709    | 1  | ,400 | 1,276  | ,723                | 2,252 |
| VASTY2(23)          | ,296   | ,288 | 1,060   | 1  | ,303 | 1,345  | ,765                | 2,365 |
| VASTY2(24)          | ,302   | ,285 | 1,122   | 1  | ,290 | 1,353  | ,773                | 2,365 |
| VASTY2(25)          | ,361   | ,302 | 1,436   | 1  | ,231 | 1,435  | ,795                | 2,592 |
| VASTY2(26)          | -,883  | ,419 | 4,447   | 1  | ,035 | ,414   | ,182                | ,940  |
| VASTY2(27)          | -1,493 | ,467 | 10,210  | 1  | ,001 | ,225   | ,090                | ,561  |
| VASTY2(28)          | -1,098 | ,476 | 5,322   | 1  | ,021 | ,334   | ,131                | ,848  |
| VASTY2(29)          | -1,189 | ,412 | 8,328   | 1  | ,004 | ,305   | ,136                | ,683  |
| VASTY2(30)          | -,120  | ,316 | ,145    | 1  | ,704 | ,887   | ,477                | 1,648 |
| VASTY2(31)          | ,586   | ,286 | 4,181   | 1  | ,041 | 1,796  | 1,025               | 3,149 |
| VASTY2(32)          | ,002   | ,324 | ,000    | 1  | ,994 | 1,002  | ,531                | 1,892 |
| VASTY2(33)          | ,092   | ,319 | ,084    | 1  | ,772 | 1,097  | ,587                | 2,048 |
| VASTY2(34)          | -1,236 | ,438 | 7,945   | 1  | ,005 | ,291   | ,123                | ,686  |
| VASTY2(35)          | ,728   | ,276 | 6,954   | 1  | ,008 | 2,072  | 1,206               | 3,560 |
| Constant            | -2,696 | ,229 | 138,940 | 1  | ,000 | ,067   |                     |       |

a. Variable(s) entered on step 1: sv5, VASTY2.

```
LOGISTIC REGRESSION VARIABLES luonnelt1
/METHOD=ENTER sv7 VASTY2
/CONTRAST (sv7)=Indicator(1)
/CONTRAST (VASTY2)=Indicator(1)
/PRINT=CI(95)
/CRITERIA=PIN(0.05) POUT(0.10) ITERATE(20) CUT(0.5).
```

## Block 1: Method = Enter

### Omnibus Tests of Model Coefficients

|        |       | Chi-square | df | Sig. |
|--------|-------|------------|----|------|
| Step 1 | Step  | 315,273    | 41 | ,000 |
|        | Block | 315,273    | 41 | ,000 |
|        | Model | 315,273    | 41 | ,000 |

### Model Summary

| Step | -2 Log likelihood    | Cox & Snell R Square | Nagelkerke R Square |
|------|----------------------|----------------------|---------------------|
| 1    | 5881,60 <sup>a</sup> | ,025                 | ,064                |

a. Estimation terminated at iteration number 7 because parameter estimates changed by less than ,001.

### Classification Table<sup>a</sup>

|                    |                                                | Predicted                                                    |              |
|--------------------|------------------------------------------------|--------------------------------------------------------------|--------------|
|                    |                                                | luonnelt1<br>luonne<br>highest = ..                          |              |
| Observed           |                                                | 0 ingen<br>händelse<br>eller läheltä<br>piti                 |              |
| Step 1             | luonnelt1 luonne highest = tapahtui potilaalle | 0 ingen händelse eller läheltä piti<br>1 tapahtui potilaalle | 11627<br>848 |
| Overall Percentage |                                                |                                                              |              |

Classification Table<sup>a</sup>

|                    |                                                   |                                                              | Predicted                            |
|--------------------|---------------------------------------------------|--------------------------------------------------------------|--------------------------------------|
|                    |                                                   |                                                              | luonnelt1<br>luonne<br>highest = ... |
| Observed           |                                                   |                                                              | 1 tapahtui<br>potilaalle             |
| Step 1             | luonnelt1 luonne highest = tapahtui<br>potilaalle | 0 ingen händelse eller läheltä piti<br>1 tapahtui potilaalle | 0<br>0                               |
| Overall Percentage |                                                   |                                                              |                                      |

Classification Table<sup>a</sup>

|                    |                                                   |                                                              | Predicted             |
|--------------------|---------------------------------------------------|--------------------------------------------------------------|-----------------------|
|                    |                                                   |                                                              | Percentage<br>Correct |
| Step 1             | luonnelt1 luonne highest = tapahtui<br>potilaalle | 0 ingen händelse eller läheltä piti<br>1 tapahtui potilaalle | 100,0<br>,0           |
| Overall Percentage |                                                   |                                                              | 93,2                  |

a. The cut value is ,500

## Variables in the Equation

|                         | B      | S.E. | Wald    | df | Sig. | Exp(B) | 95% C.I. for EXP(B) |       |
|-------------------------|--------|------|---------|----|------|--------|---------------------|-------|
|                         |        |      |         |    |      |        | Lower               | Upper |
| Step 1 <sup>a</sup> sv7 |        |      | 8,031   | 6  | ,236 |        |                     |       |
| sv7(1)                  | -,244  | ,152 | 2,596   | 1  | ,107 | ,783   | ,582                | 1,054 |
| sv7(2)                  | -,090  | ,158 | ,327    | 1  | ,567 | ,914   | ,671                | 1,245 |
| sv7(3)                  | -,111  | ,156 | ,507    | 1  | ,477 | ,895   | ,659                | 1,215 |
| sv7(4)                  | -,060  | ,146 | ,168    | 1  | ,682 | ,942   | ,707                | 1,255 |
| sv7(5)                  | -,014  | ,138 | ,010    | 1  | ,921 | ,986   | ,752                | 1,293 |
| sv7(6)                  | ,204   | ,153 | 1,765   | 1  | ,184 | 1,226  | ,908                | 1,655 |
| VASTY2                  |        |      | 232,195 | 35 | ,000 |        |                     |       |
| VASTY2(1)               | ,068   | ,300 | ,051    | 1  | ,821 | 1,070  | ,594                | 1,928 |
| VASTY2(2)               | ,447   | ,281 | 2,537   | 1  | ,111 | 1,564  | ,902                | 2,712 |
| VASTY2(3)               | -1,383 | ,465 | 8,849   | 1  | ,003 | ,251   | ,101                | ,624  |
| VASTY2(4)               | ,225   | ,292 | ,592    | 1  | ,442 | 1,252  | ,706                | 2,221 |
| VASTY2(5)               | -,099  | ,326 | ,092    | 1  | ,761 | ,906   | ,478                | 1,717 |
| VASTY2(6)               | -1,447 | ,449 | 10,396  | 1  | ,001 | ,235   | ,098                | ,567  |
| VASTY2(7)               | ,661   | ,272 | 5,890   | 1  | ,015 | 1,936  | 1,135               | 3,300 |
| VASTY2(8)               | -,178  | ,321 | ,308    | 1  | ,579 | ,837   | ,447                | 1,569 |
| VASTY2(9)               | ,323   | ,290 | 1,240   | 1  | ,266 | 1,381  | ,782                | 2,440 |
| VASTY2(10)              | ,921   | ,267 | 11,865  | 1  | ,001 | 2,511  | 1,487               | 4,240 |
| VASTY2(11)              | ,640   | ,272 | 5,515   | 1  | ,019 | 1,896  | 1,112               | 3,233 |
| VASTY2(12)              | ,077   | ,298 | ,066    | 1  | ,797 | 1,080  | ,602                | 1,935 |
| VASTY2(13)              | ,913   | ,268 | 11,580  | 1  | ,001 | 2,491  | 1,472               | 4,213 |
| VASTY2(14)              | -,287  | ,322 | ,794    | 1  | ,373 | ,750   | ,399                | 1,411 |
| VASTY2(15)              | ,164   | ,294 | ,310    | 1  | ,577 | 1,178  | ,662                | 2,096 |
| VASTY2(16)              | ,467   | ,332 | 1,983   | 1  | ,159 | 1,596  | ,833                | 3,059 |
| VASTY2(17)              | -1,077 | ,418 | 6,623   | 1  | ,010 | ,341   | ,150                | ,774  |
| VASTY2(18)              | -,507  | ,378 | 1,795   | 1  | ,180 | ,602   | ,287                | 1,264 |
| VASTY2(19)              | -1,627 | ,558 | 8,509   | 1  | ,004 | ,196   | ,066                | ,586  |
| VASTY2(20)              | ,016   | ,317 | ,002    | 1  | ,960 | 1,016  | ,546                | 1,890 |
| VASTY2(21)              | -,072  | ,312 | ,053    | 1  | ,817 | ,931   | ,505                | 1,715 |
| VASTY2(22)              | ,247   | ,290 | ,728    | 1  | ,393 | 1,280  | ,726                | 2,259 |
| VASTY2(23)              | ,303   | ,288 | 1,108   | 1  | ,293 | 1,354  | ,770                | 2,381 |
| VASTY2(24)              | ,302   | ,285 | 1,123   | 1  | ,289 | 1,353  | ,774                | 2,367 |
| VASTY2(25)              | ,369   | ,302 | 1,499   | 1  | ,221 | 1,447  | ,801                | 2,613 |
| VASTY2(26)              | -,878  | ,419 | 4,400   | 1  | ,036 | ,416   | ,183                | ,944  |
| VASTY2(27)              | -1,506 | ,468 | 10,348  | 1  | ,001 | ,222   | ,089                | ,555  |
| VASTY2(28)              | -1,152 | ,480 | 5,766   | 1  | ,016 | ,316   | ,123                | ,809  |
| VASTY2(29)              | -1,245 | ,417 | 8,931   | 1  | ,003 | ,288   | ,127                | ,651  |
| VASTY2(30)              | -,114  | ,316 | ,130    | 1  | ,718 | ,892   | ,480                | 1,659 |
| VASTY2(31)              | ,641   | ,287 | 4,983   | 1  | ,026 | 1,899  | 1,081               | 3,334 |
| VASTY2(32)              | ,084   | ,328 | ,066    | 1  | ,797 | 1,088  | ,572                | 2,069 |
| VASTY2(33)              | ,182   | ,324 | ,314    | 1  | ,575 | 1,199  | ,636                | 2,263 |
| VASTY2(34)              | -1,234 | ,438 | 7,924   | 1  | ,005 | ,291   | ,123                | ,687  |



**Variables in the Equation**

|            | B      | S.E. | Wald    | df | Sig. | Exp(B) | 95% C.I. for EXP(B) |       |
|------------|--------|------|---------|----|------|--------|---------------------|-------|
|            |        |      |         |    |      |        | Lower               | Upper |
| VASTY2(35) | ,739   | ,277 | 7,138   | 1  | ,008 | 2,094  | 1,218               | 3,600 |
| Constant   | -2,631 | ,233 | 127,277 | 1  | ,000 | ,072   |                     |       |

a. Variable(s) entered on step 1: sv7, VASTY2.

\*\*

```
LOGISTIC REGRESSION VARIABLES seurauslt3
/METHOD=ENTER bv1 VASTY2
/CONTRAST (bv1)=Indicator(1)
/CONTRAST (VASTY2)=Indicator(1)
/PRINT=CI(95)
/CRITERIA=PIN(0.05) POUT(0.10) ITERATE(20) CUT(0.5).
```

**Block 1: Method = Enter**

**Omnibus Tests of Model Coefficients**

|        |       | Chi-square | df | Sig. |
|--------|-------|------------|----|------|
| Step 1 | Step  | 300,184    | 37 | ,000 |
|        | Block | 300,184    | 37 | ,000 |
|        | Model | 300,184    | 37 | ,000 |

**Model Summary**

| Step | -2 Log likelihood    | Cox & Snell R Square | Nagelkerke R Square |
|------|----------------------|----------------------|---------------------|
| 1    | 3238,86 <sup>a</sup> | ,024                 | ,096                |

a. Estimation terminated at iteration number 9 because parameter estimates changed by less than ,001.

Classification Table<sup>a</sup>

| Observed           |                                   | Predicted                        |
|--------------------|-----------------------------------|----------------------------------|
|                    |                                   | seurauslt3 seuraus highest = ... |
|                    | 0 ingen händelse eller ei haittaa | 12075                            |
|                    | 1 haittaa (i någon form)          | 400                              |
| Overall Percentage |                                   |                                  |

Classification Table<sup>a</sup>

| Observed           |                                                     | Predicted                         |
|--------------------|-----------------------------------------------------|-----------------------------------|
|                    |                                                     | seurauslt3 seuraus highest = ...  |
|                    | 1 haittaa (i någon form)                            |                                   |
| Step 1             | seurauslt3 seuraus highest = haittaa (i någon form) | 0 ingen händelse eller ei haittaa |
|                    |                                                     | 1 haittaa (i någon form)          |
| Overall Percentage |                                                     |                                   |

Classification Table<sup>a</sup>

| Observed           |                                                     | Predicted          |
|--------------------|-----------------------------------------------------|--------------------|
|                    |                                                     | Percentage Correct |
| Step 1             | seurauslt3 seuraus highest = haittaa (i någon form) | 100,0              |
|                    |                                                     | ,0                 |
| Overall Percentage |                                                     | 96,8               |

a. The cut value is ,500

## Variables in the Equation

|                         | B      | S.E.  | Wald    | df | Sig. | Exp(B) | 95% C.I. for EXP(B) |       |
|-------------------------|--------|-------|---------|----|------|--------|---------------------|-------|
|                         |        |       |         |    |      |        | Lower               | Upper |
| Step 1 <sup>a</sup> bv1 |        |       | 4,262   | 2  | ,119 |        |                     |       |
| bv1(1)                  | -,197  | ,148  | 1,765   | 1  | ,184 | ,821   | ,614                | 1,098 |
| bv1(2)                  | ,124   | ,119  | 1,076   | 1  | ,300 | 1,132  | ,896                | 1,430 |
| VASTY2                  |        |       | 224,461 | 35 | ,000 |        |                     |       |
| VASTY2(1)               | ,598   | ,424  | 1,990   | 1  | ,158 | 1,818  | ,792                | 4,170 |
| VASTY2(2)               | 1,196  | ,389  | 9,428   | 1  | ,002 | 3,306  | 1,541               | 7,093 |
| VASTY2(3)               | -1,630 | ,787  | 4,283   | 1  | ,038 | ,196   | ,042                | ,917  |
| VASTY2(4)               | ,446   | ,431  | 1,070   | 1  | ,301 | 1,561  | ,671                | 3,633 |
| VASTY2(5)               | ,447   | ,441  | 1,025   | 1  | ,311 | 1,563  | ,658                | 3,710 |
| VASTY2(6)               | -1,585 | ,786  | 4,062   | 1  | ,044 | ,205   | ,044                | ,957  |
| VASTY2(7)               | ,558   | ,425  | 1,726   | 1  | ,189 | 1,747  | ,760                | 4,014 |
| VASTY2(8)               | ,242   | ,448  | ,291    | 1  | ,590 | 1,273  | ,529                | 3,065 |
| VASTY2(9)               | 1,083  | ,398  | 7,419   | 1  | ,006 | 2,954  | 1,355               | 6,442 |
| VASTY2(10)              | 1,445  | ,380  | 14,450  | 1  | ,000 | 4,244  | 2,014               | 8,942 |
| VASTY2(11)              | 1,131  | ,393  | 8,286   | 1  | ,004 | 3,098  | 1,435               | 6,690 |
| VASTY2(12)              | ,610   | ,420  | 2,110   | 1  | ,146 | 1,840  | ,808                | 4,189 |
| VASTY2(13)              | 1,428  | ,382  | 14,000  | 1  | ,000 | 4,172  | 1,974               | 8,815 |
| VASTY2(14)              | ,154   | ,457  | ,113    | 1  | ,737 | 1,166  | ,476                | 2,855 |
| VASTY2(15)              | -1,562 | ,786  | 3,953   | 1  | ,047 | ,210   | ,045                | ,978  |
| VASTY2(16)              | -,398  | ,674  | ,349    | 1  | ,555 | ,672   | ,179                | 2,516 |
| VASTY2(17)              | -,240  | ,510  | ,221    | 1  | ,638 | ,787   | ,290                | 2,137 |
| VASTY2(18)              | -1,109 | ,671  | 2,732   | 1  | ,098 | ,330   | ,088                | 1,229 |
| VASTY2(19)              | -2,077 | 1,061 | 3,833   | 1  | ,050 | ,125   | ,016                | 1,002 |
| VASTY2(20)              | ,452   | ,450  | 1,010   | 1  | ,315 | 1,572  | ,651                | 3,795 |
| VASTY2(21)              | -1,553 | ,786  | 3,907   | 1  | ,048 | ,212   | ,045                | ,987  |
| VASTY2(22)              | -,763  | ,606  | 1,581   | 1  | ,209 | ,466   | ,142                | 1,531 |
| VASTY2(23)              | ,221   | ,456  | ,236    | 1  | ,627 | 1,248  | ,511                | 3,049 |
| VASTY2(24)              | -,910  | ,607  | 2,246   | 1  | ,134 | ,403   | ,122                | 1,323 |
| VASTY2(25)              | -1,288 | ,786  | 2,688   | 1  | ,101 | ,276   | ,059                | 1,286 |
| VASTY2(26)              | -2,035 | 1,057 | 3,701   | 1  | ,054 | ,131   | ,016                | 1,039 |
| VASTY2(27)              | -,885  | ,607  | 2,129   | 1  | ,145 | ,413   | ,126                | 1,355 |
| VASTY2(28)              | -,184  | ,566  | ,106    | 1  | ,745 | ,832   | ,275                | 2,520 |
| VASTY2(29)              | -,455  | ,533  | ,731    | 1  | ,393 | ,634   | ,223                | 1,802 |
| VASTY2(30)              | -,294  | ,510  | ,333    | 1  | ,564 | ,745   | ,274                | 2,024 |
| VASTY2(31)              | 1,255  | ,389  | 10,390  | 1  | ,001 | 3,507  | 1,635               | 7,523 |
| VASTY2(32)              | -,214  | ,511  | ,175    | 1  | ,675 | ,807   | ,297                | 2,198 |
| VASTY2(33)              | -,236  | ,510  | ,213    | 1  | ,644 | ,790   | ,291                | 2,148 |
| VASTY2(34)              | -1,133 | ,671  | 2,852   | 1  | ,091 | ,322   | ,086                | 1,200 |
| VASTY2(35)              | ,075   | ,481  | ,024    | 1  | ,876 | 1,078  | ,420                | 2,766 |
| Constant                | -3,641 | ,341  | 114,195 | 1  | ,000 | ,026   |                     |       |

a. Variable(s) entered on step 1: bv1, VASTY2.

```

LOGISTIC REGRESSION VARIABLES seurauslt3
/METHOD=ENTER bv2 VASTY2
/CONTRAST (bv2)=Indicator(1)
/CONTRAST (VASTY2)=Indicator(1)
/PRINT=CI(95)
/CRITERIA=PIN(0.05) POUT(0.10) ITERATE(20) CUT(0.5).

```

## Block 1: Method = Enter

### Omnibus Tests of Model Coefficients

|        |       | Chi-square | df | Sig. |
|--------|-------|------------|----|------|
| Step 1 | Step  | 297,735    | 37 | ,000 |
|        | Block | 297,735    | 37 | ,000 |
|        | Model | 297,735    | 37 | ,000 |

### Model Summary

| Step | -2 Log likelihood    | Cox & Snell R Square | Nagelkerke R Square |
|------|----------------------|----------------------|---------------------|
| 1    | 3241,31 <sup>a</sup> | ,024                 | ,095                |

a. Estimation terminated at iteration number 9 because parameter estimates changed by less than ,001.

### Classification Table<sup>a</sup>

|                    |                                                    | Predicted                                                    |
|--------------------|----------------------------------------------------|--------------------------------------------------------------|
|                    |                                                    | seorauslt3 seuraus highest = ...                             |
|                    |                                                    | 0 ingen händelse eller ei haittaa                            |
| Observed           |                                                    |                                                              |
| Step 1             | seorauslt3 seuraus highest = haitta (i någon form) | 0 ingen händelse eller ei haittaa<br>1 haitta (i någon form) |
| Overall Percentage |                                                    | 12075<br>400                                                 |

Classification Table<sup>a</sup>

| Observed           |                                                    | Predicted                         |                         |
|--------------------|----------------------------------------------------|-----------------------------------|-------------------------|
|                    |                                                    | seurauslt3 seuraus highest = ...  | 1 haitta (i någon form) |
| Step 1             | seurauslt3 seuraus highest = haitta (i någon form) | 0 ingen händelse eller ei haittaa | 0                       |
|                    |                                                    | 1 haitta (i någon form)           | 0                       |
| Overall Percentage |                                                    |                                   |                         |

Classification Table<sup>a</sup>

| Observed           |                                                    | Predicted                         |       |
|--------------------|----------------------------------------------------|-----------------------------------|-------|
|                    |                                                    | Percentage Correct                |       |
| Step 1             | seurauslt3 seuraus highest = haitta (i någon form) | 0 ingen händelse eller ei haittaa | 100,0 |
|                    |                                                    | 1 haitta (i någon form)           | ,0    |
| Overall Percentage |                                                    |                                   | 96,8  |

a. The cut value is ,500

view only

## Variables in the Equation

|                         | B      | S.E.  | Wald    | df | Sig. | Exp(B) | 95% C.I. for EXP(B) |       |
|-------------------------|--------|-------|---------|----|------|--------|---------------------|-------|
|                         |        |       |         |    |      |        | Lower               | Upper |
| Step 1 <sup>a</sup> bv2 |        |       | 1,904   | 2  | ,386 |        |                     |       |
| bv2(1)                  | ,023   | ,149  | ,023    | 1  | ,879 | 1,023  | ,764                | 1,370 |
| bv2(2)                  | ,161   | ,135  | 1,416   | 1  | ,234 | 1,174  | ,901                | 1,530 |
| VASTY2                  |        |       | 226,913 | 35 | ,000 |        |                     |       |
| VASTY2(1)               | ,590   | ,424  | 1,939   | 1  | ,164 | 1,804  | ,786                | 4,138 |
| VASTY2(2)               | 1,208  | ,390  | 9,621   | 1  | ,002 | 3,347  | 1,560               | 7,182 |
| VASTY2(3)               | -1,592 | ,787  | 4,094   | 1  | ,043 | ,203   | ,044                | ,951  |
| VASTY2(4)               | ,472   | ,430  | 1,202   | 1  | ,273 | 1,603  | ,690                | 3,727 |
| VASTY2(5)               | ,454   | ,441  | 1,058   | 1  | ,304 | 1,574  | ,663                | 3,736 |
| VASTY2(6)               | -1,565 | ,786  | 3,965   | 1  | ,046 | ,209   | ,045                | ,976  |
| VASTY2(7)               | ,587   | ,423  | 1,923   | 1  | ,165 | 1,798  | ,785                | 4,122 |
| VASTY2(8)               | ,259   | ,448  | ,333    | 1  | ,564 | 1,295  | ,538                | 3,119 |
| VASTY2(9)               | 1,098  | ,398  | 7,622   | 1  | ,006 | 2,998  | 1,375               | 6,538 |
| VASTY2(10)              | 1,470  | ,380  | 14,928  | 1  | ,000 | 4,347  | 2,063               | 9,162 |
| VASTY2(11)              | 1,134  | ,393  | 8,342   | 1  | ,004 | 3,107  | 1,440               | 6,707 |
| VASTY2(12)              | ,630   | ,420  | 2,250   | 1  | ,134 | 1,877  | ,824                | 4,275 |
| VASTY2(13)              | 1,461  | ,382  | 14,620  | 1  | ,000 | 4,309  | 2,038               | 9,112 |
| VASTY2(14)              | ,165   | ,457  | ,131    | 1  | ,718 | 1,179  | ,482                | 2,887 |
| VASTY2(15)              | -1,555 | ,786  | 3,916   | 1  | ,048 | ,211   | ,045                | ,985  |
| VASTY2(16)              | -,406  | ,673  | ,364    | 1  | ,546 | ,666   | ,178                | 2,493 |
| VASTY2(17)              | -,261  | ,510  | ,262    | 1  | ,609 | ,770   | ,284                | 2,093 |
| VASTY2(18)              | -1,125 | ,671  | 2,809   | 1  | ,094 | ,325   | ,087                | 1,210 |
| VASTY2(19)              | -2,191 | 1,059 | 4,282   | 1  | ,039 | ,112   | ,014                | ,891  |
| VASTY2(20)              | ,462   | ,449  | 1,057   | 1  | ,304 | 1,587  | ,658                | 3,828 |
| VASTY2(21)              | -1,547 | ,786  | 3,881   | 1  | ,049 | ,213   | ,046                | ,992  |
| VASTY2(22)              | -,794  | ,607  | 1,715   | 1  | ,190 | ,452   | ,138                | 1,484 |
| VASTY2(23)              | ,207   | ,456  | ,207    | 1  | ,649 | 1,230  | ,504                | 3,006 |
| VASTY2(24)              | -,884  | ,607  | 2,123   | 1  | ,145 | ,413   | ,126                | 1,357 |
| VASTY2(25)              | -1,292 | ,786  | 2,704   | 1  | ,100 | ,275   | ,059                | 1,281 |
| VASTY2(26)              | -2,030 | 1,057 | 3,684   | 1  | ,055 | ,131   | ,017                | 1,044 |
| VASTY2(27)              | -,878  | ,607  | 2,092   | 1  | ,148 | ,416   | ,127                | 1,365 |
| VASTY2(28)              | -,153  | ,566  | ,073    | 1  | ,787 | ,858   | ,283                | 2,602 |
| VASTY2(29)              | -,437  | ,533  | ,673    | 1  | ,412 | ,646   | ,227                | 1,835 |
| VASTY2(30)              | -,281  | ,510  | ,303    | 1  | ,582 | ,755   | ,278                | 2,051 |
| VASTY2(31)              | 1,235  | ,388  | 10,110  | 1  | ,001 | 3,439  | 1,606               | 7,364 |
| VASTY2(32)              | -,250  | ,510  | ,240    | 1  | ,624 | ,779   | ,286                | 2,116 |
| VASTY2(33)              | -,259  | ,510  | ,259    | 1  | ,611 | ,772   | ,284                | 2,096 |
| VASTY2(34)              | -1,128 | ,671  | 2,824   | 1  | ,093 | ,324   | ,087                | 1,206 |
| VASTY2(35)              | ,092   | ,480  | ,036    | 1  | ,849 | 1,096  | ,428                | 2,807 |
| Constant                | -3,728 | ,349  | 114,019 | 1  | ,000 | ,024   |                     |       |

a. Variable(s) entered on step 1: bv2, VASTY2.

```

LOGISTIC REGRESSION VARIABLES seurauslt3
/METHOD=ENTER bv3 VASTY2
/CONTRAST (bv3)=Indicator(1)
/CONTRAST (VASTY2)=Indicator(1)
/PRINT=CI(95)
/CRITERIA=PIN(0.05) POUT(0.10) ITERATE(20) CUT(0.5).

```

## Block 1: Method = Enter

### Omnibus Tests of Model Coefficients

|        |       | Chi-square | df | Sig. |
|--------|-------|------------|----|------|
| Step 1 | Step  | 297,547    | 37 | ,000 |
|        | Block | 297,547    | 37 | ,000 |
|        | Model | 297,547    | 37 | ,000 |

### Model Summary

| Step | -2 Log likelihood    | Cox & Snell R Square | Nagelkerke R Square |
|------|----------------------|----------------------|---------------------|
| 1    | 3241,50 <sup>a</sup> | ,024                 | ,095                |

a. Estimation terminated at iteration number 9 because parameter estimates changed by less than ,001.

### Classification Table<sup>a</sup>

|                    |                                                    | Predicted                         |       |
|--------------------|----------------------------------------------------|-----------------------------------|-------|
|                    |                                                    | seorauslt3 seuraus highest = ...  |       |
|                    |                                                    | 0 ingen händelse eller ei haittaa |       |
| Observed           |                                                    |                                   |       |
| Step 1             | seorauslt3 seuraus highest = haitta (i någon form) | 0 ingen händelse eller ei haittaa | 12075 |
|                    |                                                    | 1 haitta (i någon form)           | 400   |
| Overall Percentage |                                                    |                                   |       |

Classification Table<sup>a</sup>

| Observed |                                                    | Predicted                         |
|----------|----------------------------------------------------|-----------------------------------|
|          |                                                    | seurauslt3 seuraus highest = ...  |
|          | 1 haitta (i någon form)                            |                                   |
| Step 1   | seurauslt3 seuraus highest = haitta (i någon form) | 0 ingen händelse eller ei haittaa |
|          |                                                    | 1 haitta (i någon form)           |
|          | Overall Percentage                                 |                                   |
|          |                                                    | 0                                 |
|          |                                                    | 0                                 |

Classification Table<sup>a</sup>

| Observed |                                                    | Predicted                         |
|----------|----------------------------------------------------|-----------------------------------|
|          |                                                    | Percentage Correct                |
| Step 1   | seurauslt3 seuraus highest = haitta (i någon form) | 0 ingen händelse eller ei haittaa |
|          |                                                    | 1 haitta (i någon form)           |
|          | Overall Percentage                                 |                                   |
|          |                                                    | 100,0                             |
|          |                                                    | ,0                                |
|          |                                                    | 96,8                              |

a. The cut value is ,500

view only



## Variables in the Equation

|                         | B      | S.E.  | Wald    | df | Sig. | Exp(B) | 95% C.I. for EXP(B) |       |
|-------------------------|--------|-------|---------|----|------|--------|---------------------|-------|
|                         |        |       |         |    |      |        | Lower               | Upper |
| Step 1 <sup>a</sup> bv3 |        |       | 1,703   | 2  | ,427 |        |                     |       |
| bv3(1)                  | -,161  | ,197  | ,671    | 1  | ,413 | ,851   | ,578                | 1,252 |
| bv3(2)                  | ,132   | ,148  | ,788    | 1  | ,375 | 1,141  | ,853                | 1,525 |
| VASTY2                  |        |       | 230,109 | 35 | ,000 |        |                     |       |
| VASTY2(1)               | ,614   | ,424  | 2,101   | 1  | ,147 | 1,848  | ,805                | 4,241 |
| VASTY2(2)               | 1,220  | ,389  | 9,836   | 1  | ,002 | 3,389  | 1,580               | 7,265 |
| VASTY2(3)               | -1,582 | ,787  | 4,039   | 1  | ,044 | ,206   | ,044                | ,962  |
| VASTY2(4)               | ,480   | ,431  | 1,242   | 1  | ,265 | 1,616  | ,695                | 3,759 |
| VASTY2(5)               | ,469   | ,441  | 1,130   | 1  | ,288 | 1,598  | ,673                | 3,791 |
| VASTY2(6)               | -1,559 | ,787  | 3,927   | 1  | ,048 | ,210   | ,045                | ,983  |
| VASTY2(7)               | ,587   | ,427  | 1,887   | 1  | ,170 | 1,799  | ,778                | 4,156 |
| VASTY2(8)               | ,277   | ,448  | ,382    | 1  | ,537 | 1,319  | ,548                | 3,171 |
| VASTY2(9)               | 1,117  | ,397  | 7,918   | 1  | ,005 | 3,057  | 1,404               | 6,656 |
| VASTY2(10)              | 1,480  | ,380  | 15,190  | 1  | ,000 | 4,392  | 2,087               | 9,243 |
| VASTY2(11)              | 1,145  | ,393  | 8,500   | 1  | ,004 | 3,142  | 1,455               | 6,784 |
| VASTY2(12)              | ,645   | ,419  | 2,366   | 1  | ,124 | 1,906  | ,838                | 4,334 |
| VASTY2(13)              | 1,489  | ,380  | 15,375  | 1  | ,000 | 4,433  | 2,106               | 9,331 |
| VASTY2(14)              | ,185   | ,456  | ,165    | 1  | ,684 | 1,204  | ,492                | 2,944 |
| VASTY2(15)              | -1,536 | ,785  | 3,824   | 1  | ,051 | ,215   | ,046                | 1,004 |
| VASTY2(16)              | -,402  | ,675  | ,354    | 1  | ,552 | ,669   | ,178                | 2,511 |
| VASTY2(17)              | -,254  | ,510  | ,248    | 1  | ,618 | ,776   | ,286                | 2,107 |
| VASTY2(18)              | -1,113 | ,671  | 2,747   | 1  | ,097 | ,329   | ,088                | 1,225 |
| VASTY2(19)              | -2,121 | 1,063 | 3,981   | 1  | ,046 | ,120   | ,015                | ,963  |
| VASTY2(20)              | ,475   | ,450  | 1,114   | 1  | ,291 | 1,608  | ,666                | 3,885 |
| VASTY2(21)              | -1,535 | ,785  | 3,819   | 1  | ,051 | ,215   | ,046                | 1,004 |
| VASTY2(22)              | -,805  | ,606  | 1,767   | 1  | ,184 | ,447   | ,136                | 1,465 |
| VASTY2(23)              | ,216   | ,456  | ,225    | 1  | ,636 | 1,241  | ,508                | 3,033 |
| VASTY2(24)              | -,874  | ,607  | 2,074   | 1  | ,150 | ,417   | ,127                | 1,371 |
| VASTY2(25)              | -1,284 | ,786  | 2,668   | 1  | ,102 | ,277   | ,059                | 1,292 |
| VASTY2(26)              | -2,007 | 1,057 | 3,605   | 1  | ,058 | ,134   | ,017                | 1,067 |
| VASTY2(27)              | -,851  | ,606  | 1,968   | 1  | ,161 | ,427   | ,130                | 1,402 |
| VASTY2(28)              | -,131  | ,565  | ,054    | 1  | ,816 | ,877   | ,290                | 2,653 |
| VASTY2(29)              | -,436  | ,533  | ,669    | 1  | ,413 | ,647   | ,228                | 1,837 |
| VASTY2(30)              | -,282  | ,510  | ,305    | 1  | ,580 | ,754   | ,278                | 2,049 |
| VASTY2(31)              | 1,263  | ,391  | 10,431  | 1  | ,001 | 3,536  | 1,643               | 7,611 |
| VASTY2(32)              | -,217  | ,513  | ,180    | 1  | ,672 | ,805   | ,295                | 2,198 |
| VASTY2(33)              | -,229  | ,511  | ,201    | 1  | ,654 | ,795   | ,292                | 2,167 |
| VASTY2(34)              | -1,121 | ,671  | 2,791   | 1  | ,095 | ,326   | ,088                | 1,214 |
| VASTY2(35)              | ,100   | ,482  | ,043    | 1  | ,835 | 1,106  | ,430                | 2,842 |
| Constant                | -3,667 | ,338  | 117,811 | 1  | ,000 | ,026   |                     |       |

a. Variable(s) entered on step 1: bv3, VASTY2.

```

LOGISTIC REGRESSION VARIABLES seurauslt3
/METHOD=ENTER sv3 VASTY2
/CONTRAST (sv3)=Indicator(1)
/CONTRAST (VASTY2)=Indicator(1)
/PRINT=CI(95)
/CRITERIA=PIN(0.05) POUT(0.10) ITERATE(20) CUT(0.5).

```

## Block 1: Method = Enter

### Omnibus Tests of Model Coefficients

|        |       | Chi-square | df | Sig. |
|--------|-------|------------|----|------|
| Step 1 | Step  | 296,871    | 37 | ,000 |
|        | Block | 296,871    | 37 | ,000 |
|        | Model | 296,871    | 37 | ,000 |

### Model Summary

| Step | -2 Log likelihood    | Cox & Snell R Square | Nagelkerke R Square |
|------|----------------------|----------------------|---------------------|
| 1    | 3242,18 <sup>a</sup> | ,024                 | ,095                |

a. Estimation terminated at iteration number 9 because parameter estimates changed by less than ,001.

### Classification Table<sup>a</sup>

|                    |                                                    | Predicted                         |       |
|--------------------|----------------------------------------------------|-----------------------------------|-------|
|                    |                                                    | seorauslt3 seuraus highest = ...  |       |
|                    |                                                    | 0 ingen händelse eller ei haittaa |       |
| Observed           |                                                    |                                   |       |
| Step 1             | seorauslt3 seuraus highest = haitta (i någon form) | 0 ingen händelse eller ei haittaa | 12075 |
|                    |                                                    | 1 haitta (i någon form)           | 400   |
| Overall Percentage |                                                    |                                   |       |

Classification Table<sup>a</sup>

| Observed           |                                                    | Predicted                         |                         |
|--------------------|----------------------------------------------------|-----------------------------------|-------------------------|
|                    |                                                    | seurauslt3 seuraus highest = ...  | 1 haitta (i någon form) |
| Step 1             | seurauslt3 seuraus highest = haitta (i någon form) | 0 ingen händelse eller ei haittaa | 0                       |
|                    |                                                    | 1 haitta (i någon form)           | 0                       |
| Overall Percentage |                                                    |                                   |                         |

Classification Table<sup>a</sup>

| Observed           |                                                    | Predicted                         |       |
|--------------------|----------------------------------------------------|-----------------------------------|-------|
|                    |                                                    | Percentage Correct                |       |
| Step 1             | seurauslt3 seuraus highest = haitta (i någon form) | 0 ingen händelse eller ei haittaa | 100,0 |
|                    |                                                    | 1 haitta (i någon form)           | ,0    |
| Overall Percentage |                                                    |                                   | 96,8  |

a. The cut value is ,500

view only

## Variables in the Equation

|                     | B      | S.E.  | Wald    | df | Sig. | Exp(B) | 95% C.I. for EXP(B) |       |
|---------------------|--------|-------|---------|----|------|--------|---------------------|-------|
|                     |        |       |         |    |      |        | Lower               | Upper |
| Step 1 <sup>a</sup> |        |       |         |    |      |        |                     |       |
| sv3                 |        |       | 1,026   | 2  | ,599 |        |                     |       |
| sv3(1)              | -,128  | ,156  | ,675    | 1  | ,411 | ,880   | ,649                | 1,194 |
| sv3(2)              | ,033   | ,148  | ,051    | 1  | ,822 | 1,034  | ,774                | 1,380 |
| VASTY2              |        |       | 218,913 | 35 | ,000 |        |                     |       |
| VASTY2(1)           | ,591   | ,425  | 1,936   | 1  | ,164 | 1,806  | ,785                | 4,154 |
| VASTY2(2)           | 1,185  | ,395  | 9,009   | 1  | ,003 | 3,270  | 1,508               | 7,088 |
| VASTY2(3)           | -1,505 | ,786  | 3,673   | 1  | ,055 | ,222   | ,048                | 1,035 |
| VASTY2(4)           | ,548   | ,429  | 1,635   | 1  | ,201 | 1,731  | ,747                | 4,011 |
| VASTY2(5)           | ,535   | ,443  | 1,457   | 1  | ,227 | 1,708  | ,716                | 4,072 |
| VASTY2(6)           | -1,571 | ,790  | 3,952   | 1  | ,047 | ,208   | ,044                | ,978  |
| VASTY2(7)           | ,685   | ,420  | 2,670   | 1  | ,102 | 1,985  | ,872                | 4,516 |
| VASTY2(8)           | ,327   | ,448  | ,530    | 1  | ,467 | 1,386  | ,576                | 3,339 |
| VASTY2(9)           | 1,142  | ,396  | 8,306   | 1  | ,004 | 3,134  | 1,441               | 6,817 |
| VASTY2(10)          | 1,445  | ,388  | 13,885  | 1  | ,000 | 4,242  | 1,984               | 9,073 |
| VASTY2(11)          | 1,158  | ,392  | 8,699   | 1  | ,003 | 3,182  | 1,475               | 6,867 |
| VASTY2(12)          | ,615   | ,424  | 2,109   | 1  | ,146 | 1,851  | ,806                | 4,246 |
| VASTY2(13)          | 1,472  | ,388  | 14,394  | 1  | ,000 | 4,358  | 2,037               | 9,322 |
| VASTY2(14)          | ,177   | ,458  | ,149    | 1  | ,699 | 1,194  | ,486                | 2,930 |
| VASTY2(15)          | -1,566 | ,788  | 3,946   | 1  | ,047 | ,209   | ,045                | ,979  |
| VASTY2(16)          | -,376  | ,674  | ,311    | 1  | ,577 | ,687   | ,183                | 2,573 |
| VASTY2(17)          | -,225  | ,511  | ,194    | 1  | ,660 | ,799   | ,294                | 2,173 |
| VASTY2(18)          | -1,006 | ,679  | 2,193   | 1  | ,139 | ,366   | ,097                | 1,384 |
| VASTY2(19)          | -2,117 | 1,062 | 3,975   | 1  | ,046 | ,120   | ,015                | ,965  |
| VASTY2(20)          | ,482   | ,451  | 1,145   | 1  | ,285 | 1,619  | ,670                | 3,916 |
| VASTY2(21)          | -1,498 | ,786  | 3,636   | 1  | ,057 | ,224   | ,048                | 1,043 |
| VASTY2(22)          | -,824  | ,606  | 1,851   | 1  | ,174 | ,439   | ,134                | 1,438 |
| VASTY2(23)          | ,223   | ,456  | ,238    | 1  | ,625 | 1,249  | ,511                | 3,054 |
| VASTY2(24)          | -,846  | ,606  | 1,946   | 1  | ,163 | ,429   | ,131                | 1,409 |
| VASTY2(25)          | -1,260 | ,787  | 2,566   | 1  | ,109 | ,284   | ,061                | 1,325 |
| VASTY2(26)          | -1,993 | 1,057 | 3,555   | 1  | ,059 | ,136   | ,017                | 1,082 |
| VASTY2(27)          | -,859  | ,608  | 1,993   | 1  | ,158 | ,424   | ,129                | 1,396 |
| VASTY2(28)          | -,164  | ,573  | ,082    | 1  | ,774 | ,849   | ,276                | 2,606 |
| VASTY2(29)          | -,476  | ,542  | ,771    | 1  | ,380 | ,621   | ,215                | 1,796 |
| VASTY2(30)          | -,220  | ,511  | ,185    | 1  | ,667 | ,803   | ,295                | 2,185 |
| VASTY2(31)          | 1,352  | ,399  | 11,499  | 1  | ,001 | 3,863  | 1,769               | 8,437 |
| VASTY2(32)          | -,141  | ,521  | ,073    | 1  | ,787 | ,869   | ,313                | 2,410 |
| VASTY2(33)          | -,149  | ,521  | ,082    | 1  | ,774 | ,861   | ,310                | 2,389 |
| VASTY2(34)          | -1,106 | ,671  | 2,717   | 1  | ,099 | ,331   | ,089                | 1,233 |
| VASTY2(35)          | ,154   | ,479  | ,104    | 1  | ,747 | 1,167  | ,457                | 2,982 |
| Constant            | -3,652 | ,344  | 112,787 | 1  | ,000 | ,026   |                     |       |

a. Variable(s) entered on step 1: sv3, VASTY2.

```

LOGISTIC REGRESSION VARIABLES seurauslt3
/METHOD=ENTER sv5 VASTY2
/CONTRAST (sv5)=Indicator(1)
/CONTRAST (VASTY2)=Indicator(1)
/PRINT=CI(95)
/CRITERIA=PIN(0.05) POUT(0.10) ITERATE(20) CUT(0.5).
    
```

**Block 1: Method = Enter**

**Omnibus Tests of Model Coefficients**

|        |       | Chi-square | df | Sig. |
|--------|-------|------------|----|------|
| Step 1 | Step  | 298,546    | 39 | ,000 |
|        | Block | 298,546    | 39 | ,000 |
|        | Model | 298,546    | 39 | ,000 |

**Model Summary**

| Step | -2 Log likelihood    | Cox & Snell R Square | Nagelkerke R Square |
|------|----------------------|----------------------|---------------------|
| 1    | 3240,50 <sup>a</sup> | ,024                 | ,096                |

a. Estimation terminated at iteration number 9 because parameter estimates changed by less than ,001.

**Classification Table<sup>a</sup>**

|        |                                                    | Predicted                                                    |
|--------|----------------------------------------------------|--------------------------------------------------------------|
|        |                                                    | seorauslt3 seuraus highest = ...                             |
|        |                                                    | 0 ingen händelse eller ei haittaa                            |
|        | Observed                                           |                                                              |
| Step 1 | seorauslt3 seuraus highest = haitta (i någon form) | 0 ingen händelse eller ei haittaa<br>1 haitta (i någon form) |
|        | Overall Percentage                                 | 12075<br>400                                                 |

Classification Table<sup>a</sup>

| Observed |                                                       | Predicted                                                    |
|----------|-------------------------------------------------------|--------------------------------------------------------------|
|          |                                                       | seurauslt3<br>seuraus<br>highest = ...                       |
|          |                                                       | 1 haitta (i<br>någon<br>form)                                |
| Step 1   | seurauslt3 seuraus highest = haitta (i<br>någon form) | 0 ingen händelse eller ei haittaa<br>1 haitta (i någon form) |
|          | Overall Percentage                                    | 0<br>0                                                       |

Classification Table<sup>a</sup>

| Observed |                                                       | Predicted                                                    |
|----------|-------------------------------------------------------|--------------------------------------------------------------|
|          |                                                       | Percentage<br>Correct                                        |
| Step 1   | seurauslt3 seuraus highest = haitta (i<br>någon form) | 0 ingen händelse eller ei haittaa<br>1 haitta (i någon form) |
|          | Overall Percentage                                    | 100,0<br>,0<br>96,8                                          |

a. The cut value is ,500

view only

Variables in the Equation

|                     | B      | S.E.  | Wald    | df | Sig. | Exp(B) | 95% C.I. for EXP(B) |       |
|---------------------|--------|-------|---------|----|------|--------|---------------------|-------|
|                     |        |       |         |    |      |        | Lower               | Upper |
| Step 1 <sup>a</sup> |        |       |         |    |      |        |                     |       |
| sv5                 |        |       | 2,683   | 4  | ,612 |        |                     |       |
| sv5(1)              | ,002   | ,197  | ,000    | 1  | ,991 | 1,002  | ,681                | 1,475 |
| sv5(2)              | -,114  | ,207  | ,305    | 1  | ,581 | ,892   | ,594                | 1,339 |
| sv5(3)              | ,102   | ,181  | ,319    | 1  | ,572 | 1,108  | ,777                | 1,580 |
| sv5(4)              | ,218   | ,193  | 1,276   | 1  | ,259 | 1,244  | ,852                | 1,816 |
| VASTY2              |        |       | 215,380 | 35 | ,000 |        |                     |       |
| VASTY2(1)           | ,552   | ,425  | 1,687   | 1  | ,194 | 1,737  | ,755                | 3,995 |
| VASTY2(2)           | 1,104  | ,398  | 7,707   | 1  | ,006 | 3,017  | 1,384               | 6,579 |
| VASTY2(3)           | -1,501 | ,786  | 3,650   | 1  | ,056 | ,223   | ,048                | 1,040 |
| VASTY2(4)           | ,539   | ,429  | 1,579   | 1  | ,209 | 1,714  | ,740                | 3,974 |
| VASTY2(5)           | ,524   | ,444  | 1,395   | 1  | ,238 | 1,689  | ,708                | 4,033 |
| VASTY2(6)           | -1,685 | ,794  | 4,507   | 1  | ,034 | ,185   | ,039                | ,879  |
| VASTY2(7)           | ,675   | ,420  | 2,593   | 1  | ,107 | 1,965  | ,864                | 4,471 |
| VASTY2(8)           | ,346   | ,449  | ,593    | 1  | ,441 | 1,413  | ,586                | 3,409 |
| VASTY2(9)           | 1,136  | ,397  | 8,204   | 1  | ,004 | 3,113  | 1,431               | 6,772 |
| VASTY2(10)          | 1,351  | ,392  | 11,907  | 1  | ,001 | 3,863  | 1,793               | 8,323 |
| VASTY2(11)          | 1,141  | ,393  | 8,452   | 1  | ,004 | 3,131  | 1,450               | 6,757 |
| VASTY2(12)          | ,554   | ,425  | 1,701   | 1  | ,192 | 1,740  | ,757                | 4,000 |
| VASTY2(13)          | 1,373  | ,392  | 12,289  | 1  | ,000 | 3,949  | 1,832               | 8,511 |
| VASTY2(14)          | ,119   | ,460  | ,067    | 1  | ,796 | 1,126  | ,458                | 2,772 |
| VASTY2(15)          | -1,641 | ,789  | 4,323   | 1  | ,038 | ,194   | ,041                | ,910  |
| VASTY2(16)          | -,439  | ,675  | ,422    | 1  | ,516 | ,645   | ,172                | 2,422 |
| VASTY2(17)          | -,244  | ,511  | ,229    | 1  | ,633 | ,783   | ,288                | 2,132 |
| VASTY2(18)          | -1,084 | ,684  | 2,515   | 1  | ,113 | ,338   | ,089                | 1,292 |
| VASTY2(19)          | -2,200 | 1,065 | 4,262   | 1  | ,039 | ,111   | ,014                | ,895  |
| VASTY2(20)          | ,414   | ,453  | ,837    | 1  | ,360 | 1,513  | ,623                | 3,676 |
| VASTY2(21)          | -1,514 | ,786  | 3,711   | 1  | ,054 | ,220   | ,047                | 1,027 |
| VASTY2(22)          | -,831  | ,606  | 1,883   | 1  | ,170 | ,436   | ,133                | 1,427 |
| VASTY2(23)          | ,212   | ,456  | ,217    | 1  | ,642 | 1,237  | ,506                | 3,024 |
| VASTY2(24)          | -,880  | ,607  | 2,103   | 1  | ,147 | ,415   | ,126                | 1,362 |
| VASTY2(25)          | -1,260 | ,787  | 2,563   | 1  | ,109 | ,284   | ,061                | 1,327 |
| VASTY2(26)          | -2,018 | 1,057 | 3,643   | 1  | ,056 | ,133   | ,017                | 1,056 |
| VASTY2(27)          | -,929  | ,610  | 2,324   | 1  | ,127 | ,395   | ,120                | 1,304 |
| VASTY2(28)          | -,294  | ,580  | ,257    | 1  | ,612 | ,745   | ,239                | 2,321 |
| VASTY2(29)          | -,611  | ,550  | 1,234   | 1  | ,267 | ,543   | ,185                | 1,595 |
| VASTY2(30)          | -,220  | ,511  | ,184    | 1  | ,668 | ,803   | ,295                | 2,187 |
| VASTY2(31)          | 1,292  | ,403  | 10,262  | 1  | ,001 | 3,639  | 1,651               | 8,020 |
| VASTY2(32)          | -,220  | ,526  | ,174    | 1  | ,676 | ,803   | ,286                | 2,253 |
| VASTY2(33)          | -,232  | ,527  | ,193    | 1  | ,661 | ,793   | ,282                | 2,230 |
| VASTY2(34)          | -1,114 | ,671  | 2,757   | 1  | ,097 | ,328   | ,088                | 1,223 |
| VASTY2(35)          | ,112   | ,479  | ,055    | 1  | ,815 | 1,118  | ,437                | 2,860 |
| Constant            | -3,700 | ,357  | 107,608 | 1  | ,000 | ,025   |                     |       |

a. Variable(s) entered on step 1: sv5, VASTY2.

```
LOGISTIC REGRESSION VARIABLES seurauslt3
/METHOD=ENTER sv7 VASTY2
/CONTRAST (sv7)=Indicator(1)
/CONTRAST (VASTY2)=Indicator(1)
/PRINT=CI(95)
/CRITERIA=PIN(0.05) POUT(0.10) ITERATE(20) CUT(0.5).
```

## Block 1: Method = Enter

### Omnibus Tests of Model Coefficients

|        |       | Chi-square | df | Sig. |
|--------|-------|------------|----|------|
| Step 1 | Step  | 299,651    | 41 | ,000 |
|        | Block | 299,651    | 41 | ,000 |
|        | Model | 299,651    | 41 | ,000 |

### Model Summary

| Step | -2 Log likelihood    | Cox & Snell R Square | Nagelkerke R Square |
|------|----------------------|----------------------|---------------------|
| 1    | 3239,40 <sup>a</sup> | ,024                 | ,096                |

a. Estimation terminated at iteration number 9 because parameter estimates changed by less than ,001.

### Classification Table<sup>a</sup>

|                    |                                                              | Predicted                         |
|--------------------|--------------------------------------------------------------|-----------------------------------|
|                    |                                                              | seurauslt3 seuraus highest = ..   |
|                    |                                                              | 0 ingen händelse eller ei haittaa |
| Observed           |                                                              |                                   |
| Step 1             | seurauslt3 seuraus highest = haitta (i någon form)           | 12075                             |
|                    | 0 ingen händelse eller ei haittaa<br>1 haitta (i någon form) | 400                               |
| Overall Percentage |                                                              |                                   |



Classification Table<sup>a</sup>

| Observed           |                                                       | Predicted                                                    |
|--------------------|-------------------------------------------------------|--------------------------------------------------------------|
|                    |                                                       | seurauslt3<br>seoraus<br>highest = ...                       |
|                    |                                                       | 1 haitta (i<br>någon<br>form)                                |
| Step 1             | seurauslt3 seuraus highest = haitta (i<br>någon form) | 0 ingen händelse eller ei haittaa<br>1 haitta (i någon form) |
|                    |                                                       | 0<br>0                                                       |
| Overall Percentage |                                                       |                                                              |

Classification Table<sup>a</sup>

| Observed           |                                                       | Predicted                                                    |
|--------------------|-------------------------------------------------------|--------------------------------------------------------------|
|                    |                                                       | Percentage<br>Correct                                        |
| Step 1             | seurauslt3 seuraus highest = haitta (i<br>någon form) | 0 ingen händelse eller ei haittaa<br>1 haitta (i någon form) |
|                    |                                                       | 100,0<br>,0                                                  |
| Overall Percentage |                                                       | 96,8                                                         |

a. The cut value is ,500

view only

## Variables in the Equation

|                         | B      | S.E.  | Wald    | df | Sig. | Exp(B) | 95% C.I. for EXP(B) |       |
|-------------------------|--------|-------|---------|----|------|--------|---------------------|-------|
|                         |        |       |         |    |      |        | Lower               | Upper |
| Step 1 <sup>a</sup> sv7 |        |       | 3,796   | 6  | ,704 |        |                     |       |
| sv7(1)                  | -,122  | ,221  | ,304    | 1  | ,581 | ,885   | ,575                | 1,365 |
| sv7(2)                  | -,210  | ,243  | ,746    | 1  | ,388 | ,810   | ,503                | 1,306 |
| sv7(3)                  | -,007  | ,228  | ,001    | 1  | ,975 | ,993   | ,635                | 1,553 |
| sv7(4)                  | ,145   | ,209  | ,481    | 1  | ,488 | 1,156  | ,768                | 1,741 |
| sv7(5)                  | -,028  | ,201  | ,020    | 1  | ,889 | ,972   | ,655                | 1,442 |
| sv7(6)                  | ,174   | ,219  | ,633    | 1  | ,426 | 1,190  | ,775                | 1,829 |
| VASTY2                  |        |       | 218,650 | 35 | ,000 |        |                     |       |
| VASTY2(1)               | ,598   | ,425  | 1,974   | 1  | ,160 | 1,818  | ,790                | 4,184 |
| VASTY2(2)               | 1,156  | ,398  | 8,426   | 1  | ,004 | 3,179  | 1,456               | 6,940 |
| VASTY2(3)               | -1,493 | ,786  | 3,609   | 1  | ,057 | ,225   | ,048                | 1,049 |
| VASTY2(4)               | ,571   | ,429  | 1,766   | 1  | ,184 | 1,769  | ,763                | 4,104 |
| VASTY2(5)               | ,551   | ,444  | 1,539   | 1  | ,215 | 1,734  | ,727                | 4,140 |
| VASTY2(6)               | -1,653 | ,797  | 4,307   | 1  | ,038 | ,191   | ,040                | ,912  |
| VASTY2(7)               | ,680   | ,420  | 2,625   | 1  | ,105 | 1,973  | ,867                | 4,490 |
| VASTY2(8)               | ,342   | ,449  | ,578    | 1  | ,447 | 1,407  | ,583                | 3,396 |
| VASTY2(9)               | 1,153  | ,397  | 8,446   | 1  | ,004 | 3,167  | 1,455               | 6,891 |
| VASTY2(10)              | 1,408  | ,393  | 12,857  | 1  | ,000 | 4,087  | 1,893               | 8,824 |
| VASTY2(11)              | 1,169  | ,393  | 8,848   | 1  | ,003 | 3,220  | 1,490               | 6,958 |
| VASTY2(12)              | ,599   | ,424  | 1,993   | 1  | ,158 | 1,820  | ,793                | 4,181 |
| VASTY2(13)              | 1,428  | ,393  | 13,212  | 1  | ,000 | 4,170  | 1,931               | 9,006 |
| VASTY2(14)              | ,162   | ,460  | ,124    | 1  | ,724 | 1,176  | ,478                | 2,895 |
| VASTY2(15)              | -1,594 | ,790  | 4,072   | 1  | ,044 | ,203   | ,043                | ,955  |
| VASTY2(16)              | -,401  | ,676  | ,352    | 1  | ,553 | ,670   | ,178                | 2,517 |
| VASTY2(17)              | -,208  | ,511  | ,166    | 1  | ,684 | ,812   | ,298                | 2,212 |
| VASTY2(18)              | -,988  | ,687  | 2,069   | 1  | ,150 | ,372   | ,097                | 1,431 |
| VASTY2(19)              | -2,101 | 1,068 | 3,865   | 1  | ,049 | ,122   | ,015                | ,993  |
| VASTY2(20)              | ,452   | ,454  | ,992    | 1  | ,319 | 1,571  | ,646                | 3,823 |
| VASTY2(21)              | -1,492 | ,786  | 3,607   | 1  | ,058 | ,225   | ,048                | 1,049 |
| VASTY2(22)              | -,822  | ,606  | 1,841   | 1  | ,175 | ,440   | ,134                | 1,441 |
| VASTY2(23)              | ,233   | ,456  | ,262    | 1  | ,609 | 1,263  | ,516                | 3,089 |
| VASTY2(24)              | -,857  | ,607  | 1,996   | 1  | ,158 | ,424   | ,129                | 1,394 |
| VASTY2(25)              | -1,242 | ,787  | 2,490   | 1  | ,115 | ,289   | ,062                | 1,351 |
| VASTY2(26)              | -2,000 | 1,057 | 3,580   | 1  | ,058 | ,135   | ,017                | 1,074 |
| VASTY2(27)              | -,885  | ,611  | 2,100   | 1  | ,147 | ,413   | ,125                | 1,366 |
| VASTY2(28)              | -,270  | ,585  | ,213    | 1  | ,644 | ,763   | ,242                | 2,404 |
| VASTY2(29)              | -,588  | ,556  | 1,116   | 1  | ,291 | ,556   | ,187                | 1,653 |
| VASTY2(30)              | -,202  | ,511  | ,155    | 1  | ,693 | ,817   | ,300                | 2,227 |
| VASTY2(31)              | 1,376  | ,405  | 11,558  | 1  | ,001 | 3,957  | 1,791               | 8,747 |
| VASTY2(32)              | -,123  | ,531  | ,054    | 1  | ,817 | ,884   | ,312                | 2,503 |
| VASTY2(33)              | -,133  | ,533  | ,062    | 1  | ,804 | ,876   | ,308                | 2,492 |
| VASTY2(34)              | -1,103 | ,671  | 2,701   | 1  | ,100 | ,332   | ,089                | 1,237 |

## Variables in the Equation

|            | B      | S.E. | Wald    | df | Sig. | Exp(B) | 95% C.I. for EXP(B) |       |
|------------|--------|------|---------|----|------|--------|---------------------|-------|
|            |        |      |         |    |      |        | Lower               | Upper |
| VASTY2(35) | ,154   | ,479 | ,104    | 1  | ,747 | 1,167  | ,456                | 2,987 |
| Constant   | -3,675 | ,363 | 102,427 | 1  | ,000 | ,025   |                     |       |

a. Variable(s) entered on step 1: sv7, VASTY2.

\*\*

```
LOGISTIC REGRESSION VARIABLES handlt1
/METHOD=ENTER bv1 VASTY2
/CONTRAST (bv1)=Indicator(1)
/CONTRAST (VASTY2)=Indicator(1)
/PRINT=CI(95)
/CRITERIA=PIN(0.05) POUT(0.10) ITERATE(20) CUT(0.5).
```

### Block 1: Method = Enter

#### Omnibus Tests of Model Coefficients

|        |       | Chi-square | df | Sig. |
|--------|-------|------------|----|------|
| Step 1 | Step  | 220,073    | 37 | ,000 |
|        | Block | 220,073    | 37 | ,000 |
|        | Model | 220,073    | 37 | ,000 |

#### Model Summary

| Step | -2 Log likelihood    | Cox & Snell R Square | Nagelkerke R Square |
|------|----------------------|----------------------|---------------------|
| 1    | 2198,71 <sup>a</sup> | ,017                 | ,099                |

a. Estimation terminated at iteration number 20 because maximum iterations has been reached. Final solution cannot be found.

Classification Table<sup>a</sup>

| Observed           |                                | Predicted                      |                      |
|--------------------|--------------------------------|--------------------------------|----------------------|
|                    |                                | handlt1 händelse larger than 1 |                      |
|                    |                                | 0 ingen eller en händelse      | 1 mer än en händelse |
| Step 1             | handlt1 händelse larger than 1 | 0 ingen eller en händelse      | 12229                |
|                    |                                | 1 mer än en händelse           | 246                  |
| Overall Percentage |                                |                                |                      |

Classification Table<sup>a</sup>

| Observed           |                                | Predicted                 |       |
|--------------------|--------------------------------|---------------------------|-------|
|                    |                                | Percentage Correct        |       |
| Step 1             | handlt1 händelse larger than 1 | 0 ingen eller en händelse | 100,0 |
|                    |                                | 1 mer än en händelse      | ,0    |
| Overall Percentage |                                |                           | 98,0  |

a. The cut value is ,500

Variables in the Equation

|                     |            | B       | S.E.     | Wald    | df | Sig. | Exp(B) | 95% C.I. |
|---------------------|------------|---------|----------|---------|----|------|--------|----------|
|                     |            |         |          |         |    |      |        | Lower    |
| Step 1 <sup>a</sup> | bv1        |         |          | 10,930  | 2  | ,004 |        |          |
|                     | bv1(1)     | -,349   | ,189     | 3,402   | 1  | ,065 | ,706   | ,487     |
|                     | bv1(2)     | ,302    | ,152     | 3,935   | 1  | ,047 | 1,352  | 1,004    |
|                     | VASTY2     |         |          | 120,570 | 35 | ,000 |        |          |
|                     | VASTY2(1)  | ,467    | ,575     | ,658    | 1  | ,417 | 1,595  | ,516     |
|                     | VASTY2(2)  | ,739    | ,545     | 1,837   | 1  | ,175 | 2,094  | ,719     |
|                     | VASTY2(3)  | -1,847  | 1,101    | 2,816   | 1  | ,093 | ,158   | ,018     |
|                     | VASTY2(4)  | ,299    | ,578     | ,267    | 1  | ,605 | 1,348  | ,434     |
|                     | VASTY2(5)  | -,501   | ,735     | ,464    | 1  | ,496 | ,606   | ,143     |
|                     | VASTY2(6)  | -17,067 | 2099,887 | ,000    | 1  | ,994 | ,000   | ,000     |
|                     | VASTY2(7)  | ,661    | ,545     | 1,471   | 1  | ,225 | 1,936  | ,666     |
|                     | VASTY2(8)  | ,228    | ,591     | ,149    | 1  | ,699 | 1,257  | ,394     |
|                     | VASTY2(9)  | ,126    | ,612     | ,042    | 1  | ,837 | 1,134  | ,342     |
|                     | VASTY2(10) | 1,478   | ,500     | 8,729   | 1  | ,003 | 4,384  | 1,645    |
|                     | VASTY2(11) | 1,431   | ,504     | 8,054   | 1  | ,005 | 4,182  | 1,557    |
|                     | VASTY2(12) | -,618   | ,735     | ,708    | 1  | ,400 | ,539   | ,128     |
|                     | VASTY2(13) | -,205   | ,640     | ,102    | 1  | ,749 | ,815   | ,232     |
|                     | VASTY2(14) | ,065    | ,612     | ,011    | 1  | ,915 | 1,068  | ,322     |
|                     | VASTY2(15) | ,103    | ,611     | ,028    | 1  | ,866 | 1,108  | ,335     |

Variables in the Equation

|                     |            | 95% C.I... |
|---------------------|------------|------------|
|                     |            | Upper      |
| Step 1 <sup>a</sup> | bv1        |            |
|                     | bv1(1)     | 1,022      |
|                     | bv1(2)     | 1,822      |
|                     | VASTY2     |            |
|                     | VASTY2(1)  | 4,926      |
|                     | VASTY2(2)  | 6,094      |
|                     | VASTY2(3)  | 1,364      |
|                     | VASTY2(4)  | 4,189      |
|                     | VASTY2(5)  | 2,561      |
|                     | VASTY2(6)  | .          |
|                     | VASTY2(7)  | 5,633      |
|                     | VASTY2(8)  | 4,006      |
|                     | VASTY2(9)  | 3,765      |
|                     | VASTY2(10) | 11,685     |
|                     | VASTY2(11) | 11,233     |
|                     | VASTY2(12) | 2,275      |
|                     | VASTY2(13) | 2,858      |
|                     | VASTY2(14) | 3,543      |
|                     | VASTY2(15) | 3,670      |

Peer review only

## Variables in the Equation

|            | B       | S.E.     | Wald   | df | Sig. | Exp(B) | 95% C.I. |
|------------|---------|----------|--------|----|------|--------|----------|
|            |         |          |        |    |      |        | Lower    |
| VASTY2(16) | ,164    | ,738     | ,050   | 1  | ,824 | 1,179  | ,278     |
| VASTY2(17) | -16,898 | 2096,665 | ,000   | 1  | ,994 | ,000   | ,000     |
| VASTY2(18) | -16,941 | 2104,491 | ,000   | 1  | ,994 | ,000   | ,000     |
| VASTY2(19) | -1,349  | 1,105    | 1,490  | 1  | ,222 | ,260   | ,030     |
| VASTY2(20) | -,442   | ,737     | ,359   | 1  | ,549 | ,643   | ,152     |
| VASTY2(21) | -,582   | ,735     | ,629   | 1  | ,428 | ,559   | ,132     |
| VASTY2(22) | ,725    | ,565     | 1,647  | 1  | ,199 | 2,064  | ,683     |
| VASTY2(23) | 1,650   | ,498     | 10,989 | 1  | ,001 | 5,208  | 1,963    |
| VASTY2(24) | 1,197   | ,512     | 5,478  | 1  | ,019 | 3,311  | 1,215    |
| VASTY2(25) | ,586    | ,591     | ,984   | 1  | ,321 | 1,798  | ,564     |
| VASTY2(26) | -,096   | ,677     | ,020   | 1  | ,888 | ,909   | ,241     |
| VASTY2(27) | -1,757  | 1,099    | 2,555  | 1  | ,110 | ,173   | ,020     |
| VASTY2(28) | -1,293  | 1,100    | 1,382  | 1  | ,240 | ,274   | ,032     |
| VASTY2(29) | -17,003 | 2095,464 | ,000   | 1  | ,994 | ,000   | ,000     |
| VASTY2(30) | ,402    | ,576     | ,487   | 1  | ,485 | 1,495  | ,484     |
| VASTY2(31) | 1,084   | ,524     | 4,279  | 1  | ,039 | 2,958  | 1,059    |
| VASTY2(32) | ,050    | ,639     | ,006   | 1  | ,938 | 1,051  | ,301     |
| VASTY2(33) | -,206   | ,676     | ,093   | 1  | ,760 | ,814   | ,216     |
| VASTY2(34) | -1,664  | 1,098    | 2,295  | 1  | ,130 | ,189   | ,022     |
| VASTY2(35) | ,954    | ,537     | 3,156  | 1  | ,076 | 2,596  | ,906     |
| Constant   | -4,232  | ,454     | 86,955 | 1  | ,000 | ,015   |          |

Variables in the Equation

|            | 95% C.I... |
|------------|------------|
|            | Upper      |
| VASTY2(16) | 5,003      |
| VASTY2(17) | .          |
| VASTY2(18) | .          |
| VASTY2(19) | 2,263      |
| VASTY2(20) | 2,725      |
| VASTY2(21) | 2,357      |
| VASTY2(22) | 6,240      |
| VASTY2(23) | 13,818     |
| VASTY2(24) | 9,024      |
| VASTY2(25) | 5,726      |
| VASTY2(26) | 3,425      |
| VASTY2(27) | 1,488      |
| VASTY2(28) | 2,370      |
| VASTY2(29) | .          |
| VASTY2(30) | 4,618      |
| VASTY2(31) | 8,264      |
| VASTY2(32) | 3,675      |
| VASTY2(33) | 3,060      |
| VASTY2(34) | 1,630      |
| VASTY2(35) | 7,438      |
| Constant   |            |

a. Variable(s) entered on step 1: bv1, VASTY2.

```
LOGISTIC REGRESSION VARIABLES handlt1
/METHOD=ENTER bv2 VASTY2
/CONTRAST (bv2)=Indicator(1)
/CONTRAST (VASTY2)=Indicator(1)
/PRINT=CI(95)
/CRITERIA=PIN(0.05) POUT(0.10) ITERATE(20) CUT(0.5).
```

**Block 1: Method = Enter**

**Omnibus Tests of Model Coefficients**

|        |       | Chi-square | df | Sig. |
|--------|-------|------------|----|------|
| Step 1 | Step  | 217,446    | 37 | ,000 |
|        | Block | 217,446    | 37 | ,000 |
|        | Model | 217,446    | 37 | ,000 |

**Model Summary**

| Step | -2 Log likelihood    | Cox & Snell R Square | Nagelkerke R Square |
|------|----------------------|----------------------|---------------------|
| 1    | 2201,34 <sup>a</sup> | ,017                 | ,098                |

a. Estimation terminated at iteration number 20 because maximum iterations has been reached. Final solution cannot be found.

**Classification Table<sup>a</sup>**

| Observed           |                                | Predicted                      |                           |
|--------------------|--------------------------------|--------------------------------|---------------------------|
|                    |                                | handlt1 händelse larger than 1 | 0 ingen eller en händelse |
| Step 1             | handlt1 händelse larger than 1 | 0 ingen eller en händelse      | 12229                     |
|                    |                                | 1 mer än en händelse           | 246                       |
| Overall Percentage |                                |                                |                           |

**Classification Table<sup>a</sup>**

| Observed           |                                | Predicted          |
|--------------------|--------------------------------|--------------------|
|                    |                                | Percentage Correct |
| Step 1             | handlt1 händelse larger than 1 | 100,0              |
|                    |                                | ,0                 |
| Overall Percentage |                                | 98,0               |

a. The cut value is ,500



## Variables in the Equation

|                     |            | B       | S.E.     | Wald    | df | Sig. | Exp(B) | 95% C.I. |
|---------------------|------------|---------|----------|---------|----|------|--------|----------|
|                     |            |         |          |         |    |      |        | Lower    |
| Step 1 <sup>a</sup> | bv2        |         |          | 8,427   | 2  | ,015 |        |          |
|                     | bv2(1)     | -,248   | ,188     | 1,736   | 1  | ,188 | ,780   | ,539     |
|                     | bv2(2)     | ,231    | ,170     | 1,847   | 1  | ,174 | 1,260  | ,903     |
|                     | VASTY2     |         |          | 120,796 | 35 | ,000 |        |          |
|                     | VASTY2(1)  | ,455    | ,575     | ,627    | 1  | ,429 | 1,577  | ,511     |
|                     | VASTY2(2)  | ,741    | ,545     | 1,845   | 1  | ,174 | 2,097  | ,720     |
|                     | VASTY2(3)  | -1,802  | 1,100    | 2,684   | 1  | ,101 | ,165   | ,019     |
|                     | VASTY2(4)  | ,330    | ,578     | ,327    | 1  | ,567 | 1,391  | ,449     |
|                     | VASTY2(5)  | -,493   | ,735     | ,450    | 1  | ,502 | ,611   | ,145     |
|                     | VASTY2(6)  | -17,032 | 2101,796 | ,000    | 1  | ,994 | ,000   | ,000     |
|                     | VASTY2(7)  | ,708    | ,543     | 1,701   | 1  | ,192 | 2,030  | ,701     |
|                     | VASTY2(8)  | ,231    | ,592     | ,153    | 1  | ,696 | 1,260  | ,395     |
|                     | VASTY2(9)  | ,136    | ,612     | ,050    | 1  | ,824 | 1,146  | ,345     |
|                     | VASTY2(10) | 1,486   | ,500     | 8,827   | 1  | ,003 | 4,421  | 1,658    |
|                     | VASTY2(11) | 1,443   | ,504     | 8,206   | 1  | ,004 | 4,234  | 1,577    |
|                     | VASTY2(12) | -,610   | ,735     | ,689    | 1  | ,406 | ,543   | ,129     |
|                     | VASTY2(13) | -,185   | ,640     | ,084    | 1  | ,772 | ,831   | ,237     |
|                     | VASTY2(14) | ,079    | ,612     | ,017    | 1  | ,898 | 1,082  | ,326     |
|                     | VASTY2(15) | ,098    | ,611     | ,026    | 1  | ,872 | 1,103  | ,333     |
|                     | VASTY2(16) | ,182    | ,737     | ,061    | 1  | ,805 | 1,199  | ,283     |
|                     | VASTY2(17) | -16,892 | 2098,459 | ,000    | 1  | ,994 | ,000   | ,000     |
|                     | VASTY2(18) | -16,938 | 2106,705 | ,000    | 1  | ,994 | ,000   | ,000     |
|                     | VASTY2(19) | -1,413  | 1,102    | 1,644   | 1  | ,200 | ,243   | ,028     |
|                     | VASTY2(20) | -,412   | ,736     | ,313    | 1  | ,576 | ,662   | ,157     |
|                     | VASTY2(21) | -,575   | ,735     | ,614    | 1  | ,433 | ,562   | ,133     |
|                     | VASTY2(22) | ,730    | ,565     | 1,667   | 1  | ,197 | 2,074  | ,685     |
|                     | VASTY2(23) | 1,641   | ,498     | 10,875  | 1  | ,001 | 5,161  | 1,946    |
|                     | VASTY2(24) | 1,230   | ,511     | 5,786   | 1  | ,016 | 3,420  | 1,256    |
|                     | VASTY2(25) | ,594    | ,591     | 1,011   | 1  | ,315 | 1,812  | ,569     |
|                     | VASTY2(26) | -,088   | ,677     | ,017    | 1  | ,897 | ,916   | ,243     |
|                     | VASTY2(27) | -1,742  | 1,099    | 2,512   | 1  | ,113 | ,175   | ,020     |
|                     | VASTY2(28) | -1,289  | 1,100    | 1,372   | 1  | ,241 | ,276   | ,032     |
|                     | VASTY2(29) | -16,985 | 2096,165 | ,000    | 1  | ,994 | ,000   | ,000     |
|                     | VASTY2(30) | ,418    | ,576     | ,526    | 1  | ,468 | 1,518  | ,491     |
|                     | VASTY2(31) | 1,095   | ,523     | 4,379   | 1  | ,036 | 2,989  | 1,072    |
|                     | VASTY2(32) | ,045    | ,638     | ,005    | 1  | ,944 | 1,046  | ,300     |
|                     | VASTY2(33) | -,206   | ,676     | ,093    | 1  | ,760 | ,813   | ,216     |
|                     | VASTY2(34) | -1,654  | 1,098    | 2,268   | 1  | ,132 | ,191   | ,022     |
|                     | VASTY2(35) | ,998    | ,535     | 3,475   | 1  | ,062 | 2,713  | ,950     |
|                     | Constant   | -4,243  | ,463     | 84,086  | 1  | ,000 | ,014   |          |

## Variables in the Equation

|                     |            | 95% C.I... |
|---------------------|------------|------------|
|                     |            | Upper      |
| Step 1 <sup>a</sup> | bv2        |            |
|                     | bv2(1)     | 1,129      |
|                     | bv2(2)     | 1,759      |
|                     | VASTY2     |            |
|                     | VASTY2(1)  | 4,870      |
|                     | VASTY2(2)  | 6,105      |
|                     | VASTY2(3)  | 1,425      |
|                     | VASTY2(4)  | 4,316      |
|                     | VASTY2(5)  | 2,579      |
|                     | VASTY2(6)  | .          |
|                     | VASTY2(7)  | 5,880      |
|                     | VASTY2(8)  | 4,019      |
|                     | VASTY2(9)  | 3,803      |
|                     | VASTY2(10) | 11,786     |
|                     | VASTY2(11) | 11,365     |
|                     | VASTY2(12) | 2,294      |
|                     | VASTY2(13) | 2,913      |
|                     | VASTY2(14) | 3,587      |
|                     | VASTY2(15) | 3,654      |
|                     | VASTY2(16) | 5,084      |
|                     | VASTY2(17) | .          |
|                     | VASTY2(18) | .          |
|                     | VASTY2(19) | 2,110      |
|                     | VASTY2(20) | 2,803      |
|                     | VASTY2(21) | 2,374      |
|                     | VASTY2(22) | 6,278      |
|                     | VASTY2(23) | 13,690     |
|                     | VASTY2(24) | 9,316      |
|                     | VASTY2(25) | 5,771      |
|                     | VASTY2(26) | 3,451      |
|                     | VASTY2(27) | 1,510      |
|                     | VASTY2(28) | 2,381      |
|                     | VASTY2(29) | .          |
|                     | VASTY2(30) | 4,691      |
|                     | VASTY2(31) | 8,336      |
|                     | VASTY2(32) | 3,652      |
|                     | VASTY2(33) | 3,057      |
|                     | VASTY2(34) | 1,646      |
|                     | VASTY2(35) | 7,745      |
|                     | Constant   |            |

a. Variable(s) entered on step 1: bv2, VASTY2.

**Block 1: Method = Enter****Omnibus Tests of Model Coefficients**

|        |       | Chi-square | df | Sig. |
|--------|-------|------------|----|------|
| Step 1 | Step  | 212,717    | 37 | ,000 |
|        | Block | 212,717    | 37 | ,000 |
|        | Model | 212,717    | 37 | ,000 |

**Model Summary**

| Step | -2 Log likelihood    | Cox & Snell R Square | Nagelkerke R Square |
|------|----------------------|----------------------|---------------------|
| 1    | 2206,07 <sup>a</sup> | ,017                 | ,096                |

a. Estimation terminated at iteration number 20 because maximum iterations has been reached. Final solution cannot be found.

**Classification Table<sup>a</sup>**

| Observed           |                                |                           | Predicted                      |                      |
|--------------------|--------------------------------|---------------------------|--------------------------------|----------------------|
|                    |                                |                           | handlt1 händelse larger than 1 |                      |
|                    |                                |                           | 0 ingen eller en händelse      | 1 mer än en händelse |
| Step 1             | handlt1 händelse larger than 1 | 0 ingen eller en händelse | 12229                          | 0                    |
|                    |                                | 1 mer än en händelse      | 246                            | 0                    |
| Overall Percentage |                                |                           |                                |                      |

**Classification Table<sup>a</sup>**

| Observed           |                                |                           | Predicted          |
|--------------------|--------------------------------|---------------------------|--------------------|
|                    |                                |                           | Percentage Correct |
| Step 1             | handlt1 händelse larger than 1 | 0 ingen eller en händelse | 100,0              |
|                    |                                | 1 mer än en händelse      | ,0                 |
| Overall Percentage |                                |                           | 98,0               |

a. The cut value is ,500

## Variables in the Equation

|                     |            | B       | S.E.     | Wald    | df | Sig. | Exp(B) | 95% C.I. |
|---------------------|------------|---------|----------|---------|----|------|--------|----------|
|                     |            |         |          |         |    |      |        | Lower    |
| Step 1 <sup>a</sup> | bv3        |         |          | 3,508   | 2  | ,173 |        |          |
|                     | bv3(1)     | -,484   | ,259     | 3,492   | 1  | ,062 | ,616   | ,371     |
|                     | bv3(2)     | -,018   | ,194     | ,009    | 1  | ,926 | ,982   | ,672     |
|                     | VASTY2     |         |          | 118,219 | 35 | ,000 |        |          |
|                     | VASTY2(1)  | ,522    | ,575     | ,825    | 1  | ,364 | 1,686  | ,546     |
|                     | VASTY2(2)  | ,795    | ,545     | 2,131   | 1  | ,144 | 2,214  | ,762     |
|                     | VASTY2(3)  | -1,646  | 1,100    | 2,238   | 1  | ,135 | ,193   | ,022     |
|                     | VASTY2(4)  | ,461    | ,578     | ,637    | 1  | ,425 | 1,585  | ,511     |
|                     | VASTY2(5)  | -,412   | ,735     | ,314    | 1  | ,575 | ,663   | ,157     |
|                     | VASTY2(6)  | -16,921 | 2104,931 | ,000    | 1  | ,994 | ,000   | ,000     |
|                     | VASTY2(7)  | ,894    | ,548     | 2,666   | 1  | ,103 | 2,445  | ,836     |
|                     | VASTY2(8)  | ,329    | ,591     | ,310    | 1  | ,578 | 1,389  | ,437     |
|                     | VASTY2(9)  | ,249    | ,611     | ,166    | 1  | ,684 | 1,283  | ,387     |
|                     | VASTY2(10) | 1,554   | ,499     | 9,677   | 1  | ,002 | 4,728  | 1,777    |
|                     | VASTY2(11) | 1,499   | ,504     | 8,860   | 1  | ,003 | 4,479  | 1,669    |
|                     | VASTY2(12) | -,535   | ,734     | ,531    | 1  | ,466 | ,586   | ,139     |
|                     | VASTY2(13) | -,027   | ,638     | ,002    | 1  | ,966 | ,973   | ,279     |
|                     | VASTY2(14) | ,182    | ,611     | ,089    | 1  | ,766 | 1,200  | ,362     |
|                     | VASTY2(15) | ,179    | ,610     | ,086    | 1  | ,770 | 1,196  | ,362     |
|                     | VASTY2(16) | ,265    | ,738     | ,129    | 1  | ,720 | 1,303  | ,306     |
|                     | VASTY2(17) | -16,892 | 2100,571 | ,000    | 1  | ,994 | ,000   | ,000     |
|                     | VASTY2(18) | -16,886 | 2109,059 | ,000    | 1  | ,994 | ,000   | ,000     |
|                     | VASTY2(19) | -1,345  | 1,107    | 1,477   | 1  | ,224 | ,261   | ,030     |
|                     | VASTY2(20) | -,297   | ,736     | ,162    | 1  | ,687 | ,743   | ,176     |
|                     | VASTY2(21) | -,520   | ,734     | ,501    | 1  | ,479 | ,595   | ,141     |
|                     | VASTY2(22) | ,645    | ,563     | 1,311   | 1  | ,252 | 1,906  | ,632     |
|                     | VASTY2(23) | 1,655   | ,498     | 11,062  | 1  | ,001 | 5,235  | 1,974    |
|                     | VASTY2(24) | 1,350   | ,511     | 6,982   | 1  | ,008 | 3,856  | 1,417    |
|                     | VASTY2(25) | ,615    | ,591     | 1,083   | 1  | ,298 | 1,850  | ,581     |
|                     | VASTY2(26) | ,016    | ,676     | ,001    | 1  | ,981 | 1,016  | ,270     |
|                     | VASTY2(27) | -1,612  | 1,099    | 2,154   | 1  | ,142 | ,199   | ,023     |
|                     | VASTY2(28) | -1,165  | 1,099    | 1,124   | 1  | ,289 | ,312   | ,036     |
|                     | VASTY2(29) | -16,951 | 2100,489 | ,000    | 1  | ,994 | ,000   | ,000     |
|                     | VASTY2(30) | ,453    | ,575     | ,621    | 1  | ,431 | 1,574  | ,510     |
|                     | VASTY2(31) | 1,211   | ,526     | 5,307   | 1  | ,021 | 3,356  | 1,198    |
|                     | VASTY2(32) | ,137    | ,640     | ,046    | 1  | ,831 | 1,147  | ,327     |
|                     | VASTY2(33) | -,125   | ,677     | ,034    | 1  | ,853 | ,882   | ,234     |
|                     | VASTY2(34) | -1,622  | 1,098    | 2,183   | 1  | ,140 | ,197   | ,023     |
|                     | VASTY2(35) | 1,141   | ,537     | 4,512   | 1  | ,034 | 3,131  | 1,092    |
|                     | Constant   | -4,243  | ,451     | 88,672  | 1  | ,000 | ,014   |          |

## Variables in the Equation

|                     |            | 95% C.I... |
|---------------------|------------|------------|
|                     |            | Upper      |
| Step 1 <sup>a</sup> | bv3        |            |
|                     | bv3(1)     | 1,024      |
|                     | bv3(2)     | 1,436      |
|                     | VASTY2     |            |
|                     | VASTY2(1)  | 5,207      |
|                     | VASTY2(2)  | 6,439      |
|                     | VASTY2(3)  | 1,666      |
|                     | VASTY2(4)  | 4,918      |
|                     | VASTY2(5)  | 2,797      |
|                     | VASTY2(6)  | .          |
|                     | VASTY2(7)  | 7,153      |
|                     | VASTY2(8)  | 4,421      |
|                     | VASTY2(9)  | 4,248      |
|                     | VASTY2(10) | 12,583     |
|                     | VASTY2(11) | 12,023     |
|                     | VASTY2(12) | 2,469      |
|                     | VASTY2(13) | 3,398      |
|                     | VASTY2(14) | 3,971      |
|                     | VASTY2(15) | 3,955      |
|                     | VASTY2(16) | 5,541      |
|                     | VASTY2(17) | .          |
|                     | VASTY2(18) | .          |
|                     | VASTY2(19) | 2,280      |
|                     | VASTY2(20) | 3,148      |
|                     | VASTY2(21) | 2,508      |
|                     | VASTY2(22) | 5,747      |
|                     | VASTY2(23) | 13,886     |
|                     | VASTY2(24) | 10,493     |
|                     | VASTY2(25) | 5,896      |
|                     | VASTY2(26) | 3,824      |
|                     | VASTY2(27) | 1,717      |
|                     | VASTY2(28) | 2,688      |
|                     | VASTY2(29) | .          |
|                     | VASTY2(30) | 4,860      |
|                     | VASTY2(31) | 9,399      |
|                     | VASTY2(32) | 4,022      |
|                     | VASTY2(33) | 3,323      |
|                     | VASTY2(34) | 1,698      |
|                     | VASTY2(35) | 8,976      |
|                     | Constant   |            |

a. Variable(s) entered on step 1: bv3, VASTY2.

```

LOGISTIC REGRESSION VARIABLES handlt1
/METHOD=ENTER sv3 VASTY2
/CONTRAST (sv3)=Indicator(1)
/CONTRAST (VASTY2)=Indicator(1)
/PRINT=CI(95)
/CRITERIA=PIN(0.05) POUT(0.10) ITERATE(20) CUT(0.5).

```

## Block 1: Method = Enter

### Omnibus Tests of Model Coefficients

|        |       | Chi-square | df | Sig. |
|--------|-------|------------|----|------|
| Step 1 | Step  | 210,059    | 37 | ,000 |
|        | Block | 210,059    | 37 | ,000 |
|        | Model | 210,059    | 37 | ,000 |

### Model Summary

| Step | -2 Log likelihood    | Cox & Snell R Square | Nagelkerke R Square |
|------|----------------------|----------------------|---------------------|
| 1    | 2208,72 <sup>a</sup> | ,017                 | ,095                |

a. Estimation terminated at iteration number 20 because maximum iterations has been reached. Final solution cannot be found.

### Classification Table<sup>a</sup>

|                    |                                |                           | Predicted                      |                      |
|--------------------|--------------------------------|---------------------------|--------------------------------|----------------------|
|                    |                                |                           | 0 ingen eller en händelse      | 1 mer än en händelse |
| Observed           |                                |                           | handlt1 händelse larger than 1 |                      |
| Step 1             | handlt1 händelse larger than 1 | 0 ingen eller en händelse | 12229                          | 0                    |
|                    |                                | 1 mer än en händelse      | 246                            | 0                    |
| Overall Percentage |                                |                           |                                |                      |

Classification Table<sup>a</sup>

| Observed           |                                | Predicted                 |                      |
|--------------------|--------------------------------|---------------------------|----------------------|
|                    |                                | 0 ingen eller en händelse | 1 mer än en händelse |
| Step 1             | handlt1 händelse larger than 1 | 100,0                     | ,0                   |
| Overall Percentage |                                | 98,0                      |                      |

a. The cut value is ,500

Variables in the Equation

|                     |            | B       | S.E.     | Wald    | df | Sig. | Exp(B) | 95% C.I. |
|---------------------|------------|---------|----------|---------|----|------|--------|----------|
|                     |            |         |          |         |    |      |        | Lower    |
| Step 1 <sup>a</sup> | sv3        |         |          | 1,277   | 2  | ,528 |        |          |
|                     | sv3(1)     | -,040   | ,181     | ,049    | 1  | ,824 | ,961   | ,674     |
|                     | sv3(2)     | ,163    | ,179     | ,825    | 1  | ,364 | 1,177  | ,828     |
|                     | VASTY2     |         |          | 118,011 | 35 | ,000 |        |          |
|                     | VASTY2(1)  | ,445    | ,577     | ,597    | 1  | ,440 | 1,561  | ,504     |
|                     | VASTY2(2)  | ,717    | ,550     | 1,696   | 1  | ,193 | 2,048  | ,696     |
|                     | VASTY2(3)  | -1,597  | 1,098    | 2,114   | 1  | ,146 | ,203   | ,024     |
|                     | VASTY2(4)  | ,490    | ,576     | ,724    | 1  | ,395 | 1,632  | ,528     |
|                     | VASTY2(5)  | -,367   | ,737     | ,248    | 1  | ,618 | ,693   | ,164     |
|                     | VASTY2(6)  | -17,038 | 2106,305 | ,000    | 1  | ,994 | ,000   | ,000     |
|                     | VASTY2(7)  | ,923    | ,538     | 2,942   | 1  | ,086 | 2,516  | ,877     |
|                     | VASTY2(8)  | ,383    | ,592     | ,419    | 1  | ,518 | 1,466  | ,460     |
|                     | VASTY2(9)  | ,251    | ,610     | ,170    | 1  | ,680 | 1,286  | ,389     |
|                     | VASTY2(10) | 1,472   | ,508     | 8,390   | 1  | ,004 | 4,356  | 1,609    |
|                     | VASTY2(11) | 1,482   | ,503     | 8,661   | 1  | ,003 | 4,400  | 1,640    |
|                     | VASTY2(12) | -,601   | ,738     | ,663    | 1  | ,415 | ,548   | ,129     |
|                     | VASTY2(13) | -,112   | ,645     | ,030    | 1  | ,862 | ,894   | ,253     |
|                     | VASTY2(14) | ,121    | ,613     | ,039    | 1  | ,843 | 1,129  | ,340     |
|                     | VASTY2(15) | ,094    | ,616     | ,023    | 1  | ,878 | 1,099  | ,329     |
|                     | VASTY2(16) | ,193    | ,737     | ,068    | 1  | ,794 | 1,212  | ,286     |
|                     | VASTY2(17) | -16,906 | 2103,049 | ,000    | 1  | ,994 | ,000   | ,000     |
|                     | VASTY2(18) | -16,854 | 2112,495 | ,000    | 1  | ,994 | ,000   | ,000     |
|                     | VASTY2(19) | -1,548  | 1,105    | 1,964   | 1  | ,161 | ,213   | ,024     |
|                     | VASTY2(20) | -,372   | ,737     | ,255    | 1  | ,614 | ,690   | ,163     |
|                     | VASTY2(21) | -,489   | ,735     | ,443    | 1  | ,506 | ,613   | ,145     |
|                     | VASTY2(22) | ,596    | ,563     | 1,122   | 1  | ,289 | 1,815  | ,602     |
|                     | VASTY2(23) | 1,637   | ,498     | 10,821  | 1  | ,001 | 5,142  | 1,938    |
|                     | VASTY2(24) | 1,334   | ,509     | 6,853   | 1  | ,009 | 3,795  | 1,398    |
|                     | VASTY2(25) | ,613    | ,592     | 1,071   | 1  | ,301 | 1,846  | ,578     |

## Variables in the Equation

|                     |            | 95% C.I... |
|---------------------|------------|------------|
|                     |            | Upper      |
| Step 1 <sup>a</sup> | sv3        |            |
|                     | sv3(1)     | 1,369      |
|                     | sv3(2)     | 1,671      |
|                     | VASTY2     |            |
|                     | VASTY2(1)  | 4,833      |
|                     | VASTY2(2)  | 6,021      |
|                     | VASTY2(3)  | 1,743      |
|                     | VASTY2(4)  | 5,041      |
|                     | VASTY2(5)  | 2,936      |
|                     | VASTY2(6)  | .          |
|                     | VASTY2(7)  | 7,223      |
|                     | VASTY2(8)  | 4,676      |
|                     | VASTY2(9)  | 4,253      |
|                     | VASTY2(10) | 11,791     |
|                     | VASTY2(11) | 11,803     |
|                     | VASTY2(12) | 2,329      |
|                     | VASTY2(13) | 3,162      |
|                     | VASTY2(14) | 3,753      |
|                     | VASTY2(15) | 3,672      |
|                     | VASTY2(16) | 5,143      |
|                     | VASTY2(17) | .          |
|                     | VASTY2(18) | .          |
|                     | VASTY2(19) | 1,853      |
|                     | VASTY2(20) | 2,922      |
|                     | VASTY2(21) | 2,588      |
|                     | VASTY2(22) | 5,471      |
|                     | VASTY2(23) | 13,641     |
|                     | VASTY2(24) | 10,300     |
|                     | VASTY2(25) | 5,896      |



Variables in the Equation

|            | B       | S.E.     | Wald   | df | Sig. | Exp(B) | 95% C.I. |
|------------|---------|----------|--------|----|------|--------|----------|
|            |         |          |        |    |      |        | Lower    |
| VASTY2(26) | -,011   | ,676     | ,000   | 1  | ,987 | ,989   | ,263     |
| VASTY2(27) | -1,698  | 1,100    | 2,381  | 1  | ,123 | ,183   | ,021     |
| VASTY2(28) | -1,261  | 1,105    | 1,304  | 1  | ,254 | ,283   | ,033     |
| VASTY2(29) | -17,056 | 2100,912 | ,000   | 1  | ,994 | ,000   | ,000     |
| VASTY2(30) | ,511    | ,577     | ,784   | 1  | ,376 | 1,666  | ,538     |
| VASTY2(31) | 1,190   | ,532     | 4,999  | 1  | ,025 | 3,288  | 1,158    |
| VASTY2(32) | ,086    | ,648     | ,018   | 1  | ,894 | 1,090  | ,306     |
| VASTY2(33) | -,148   | ,686     | ,047   | 1  | ,829 | ,862   | ,225     |
| VASTY2(34) | -1,618  | 1,098    | 2,171  | 1  | ,141 | ,198   | ,023     |
| VASTY2(35) | 1,108   | ,533     | 4,319  | 1  | ,038 | 3,028  | 1,065    |
| Constant   | -4,309  | ,458     | 88,559 | 1  | ,000 | ,013   |          |

Variables in the Equation

|            | 95% C.I. |
|------------|----------|
|            | Upper    |
| VASTY2(26) | 3,718    |
| VASTY2(27) | 1,582    |
| VASTY2(28) | 2,469    |
| VASTY2(29) | .        |
| VASTY2(30) | 5,161    |
| VASTY2(31) | 9,335    |
| VASTY2(32) | 3,884    |
| VASTY2(33) | 3,307    |
| VASTY2(34) | 1,706    |
| VASTY2(35) | 8,610    |
| Constant   |          |

a. Variable(s) entered on step 1: sv3, VASTY2.

```
LOGISTIC REGRESSION VARIABLES handlt1
/METHOD=ENTER sv5 VASTY2
/CONTRAST (sv5)=Indicator(1)
/CONTRAST (VASTY2)=Indicator(1)
/PRINT=CI(95)
/CRITERIA=PIN(0.05) POUT(0.10) ITERATE(20) CUT(0.5).
```

**Block 1: Method = Enter**

## Omnibus Tests of Model Coefficients

|        |       | Chi-square | df | Sig. |
|--------|-------|------------|----|------|
| Step 1 | Step  | 212,136    | 39 | ,000 |
|        | Block | 212,136    | 39 | ,000 |
|        | Model | 212,136    | 39 | ,000 |

## Model Summary

| Step | -2 Log likelihood    | Cox & Snell R Square | Nagelkerke R Square |
|------|----------------------|----------------------|---------------------|
| 1    | 2206,65 <sup>a</sup> | ,017                 | ,096                |

a. Estimation terminated at iteration number 20 because maximum iterations has been reached. Final solution cannot be found.

Classification Table<sup>a</sup>

| Observed           |                                |                           | Predicted                      |                           |
|--------------------|--------------------------------|---------------------------|--------------------------------|---------------------------|
|                    |                                |                           | handlt1 händelse larger than 1 | 0 ingen eller en händelse |
| Step 1             | handlt1 händelse larger than 1 | 0 ingen eller en händelse | 12229                          | 0                         |
|                    |                                | 1 mer än en händelse      | 246                            | 0                         |
| Overall Percentage |                                |                           |                                |                           |

Classification Table<sup>a</sup>

| Observed           |                                |                           | Predicted          |
|--------------------|--------------------------------|---------------------------|--------------------|
|                    |                                |                           | Percentage Correct |
| Step 1             | handlt1 händelse larger than 1 | 0 ingen eller en händelse | 100,0              |
|                    |                                | 1 mer än en händelse      | ,0                 |
| Overall Percentage |                                |                           | 98,0               |

a. The cut value is ,500

Variables in the Equation

|                     |            | B       | S.E.     | Wald    | df | Sig. | Exp(B) | 95% C.I. |
|---------------------|------------|---------|----------|---------|----|------|--------|----------|
|                     |            |         |          |         |    |      |        | Lower    |
| Step 1 <sup>a</sup> | sv5        |         |          | 3,394   | 4  | ,494 |        |          |
|                     | sv5(1)     | -,117   | ,229     | ,259    | 1  | ,611 | ,890   | ,568     |
|                     | sv5(2)     | ,028    | ,230     | ,014    | 1  | ,904 | 1,028  | ,655     |
|                     | sv5(3)     | -,035   | ,217     | ,026    | 1  | ,871 | ,965   | ,631     |
|                     | sv5(4)     | ,294    | ,234     | 1,585   | 1  | ,208 | 1,342  | ,849     |
|                     | VASTY2     |         |          | 118,179 | 35 | ,000 |        |          |
|                     | VASTY2(1)  | ,429    | ,577     | ,552    | 1  | ,458 | 1,535  | ,495     |
|                     | VASTY2(2)  | ,638    | ,555     | 1,321   | 1  | ,250 | 1,893  | ,638     |
|                     | VASTY2(3)  | -1,608  | 1,098    | 2,144   | 1  | ,143 | ,200   | ,023     |
|                     | VASTY2(4)  | ,492    | ,576     | ,730    | 1  | ,393 | 1,635  | ,529     |
|                     | VASTY2(5)  | -,380   | ,737     | ,266    | 1  | ,606 | ,684   | ,161     |
|                     | VASTY2(6)  | -17,166 | 2104,809 | ,000    | 1  | ,993 | ,000   | ,000     |
|                     | VASTY2(7)  | ,930    | ,538     | 2,987   | 1  | ,084 | 2,534  | ,883     |
|                     | VASTY2(8)  | ,360    | ,592     | ,371    | 1  | ,543 | 1,434  | ,449     |
|                     | VASTY2(9)  | ,260    | ,610     | ,181    | 1  | ,670 | 1,297  | ,392     |
|                     | VASTY2(10) | 1,379   | ,515     | 7,181   | 1  | ,007 | 3,972  | 1,448    |
|                     | VASTY2(11) | 1,476   | ,504     | 8,586   | 1  | ,003 | 4,373  | 1,630    |
|                     | VASTY2(12) | -,646   | ,740     | ,764    | 1  | ,382 | ,524   | ,123     |
|                     | VASTY2(13) | -,206   | ,650     | ,100    | 1  | ,752 | ,814   | ,228     |
|                     | VASTY2(14) | ,071    | ,615     | ,013    | 1  | ,909 | 1,073  | ,321     |
|                     | VASTY2(15) | ,027    | ,619     | ,002    | 1  | ,965 | 1,027  | ,305     |
|                     | VASTY2(16) | ,147    | ,739     | ,039    | 1  | ,843 | 1,158  | ,272     |
|                     | VASTY2(17) | -16,914 | 2102,229 | ,000    | 1  | ,994 | ,000   | ,000     |
|                     | VASTY2(18) | -16,815 | 2112,424 | ,000    | 1  | ,994 | ,000   | ,000     |
|                     | VASTY2(19) | -1,505  | 1,110    | 1,839   | 1  | ,175 | ,222   | ,025     |
|                     | VASTY2(20) | -,442   | ,740     | ,356    | 1  | ,551 | ,643   | ,151     |
|                     | VASTY2(21) | -,490   | ,735     | ,444    | 1  | ,505 | ,613   | ,145     |
|                     | VASTY2(22) | ,591    | ,563     | 1,103   | 1  | ,294 | 1,806  | ,599     |
|                     | VASTY2(23) | 1,633   | ,498     | 10,759  | 1  | ,001 | 5,121  | 1,930    |
|                     | VASTY2(24) | 1,300   | ,511     | 6,486   | 1  | ,011 | 3,670  | 1,349    |
|                     | VASTY2(25) | ,595    | ,593     | 1,007   | 1  | ,316 | 1,813  | ,567     |
|                     | VASTY2(26) | -,016   | ,676     | ,001    | 1  | ,981 | ,984   | ,261     |
|                     | VASTY2(27) | -1,759  | 1,102    | 2,549   | 1  | ,110 | ,172   | ,020     |
|                     | VASTY2(28) | -1,415  | 1,111    | 1,620   | 1  | ,203 | ,243   | ,028     |
|                     | VASTY2(29) | -17,217 | 2100,737 | ,000    | 1  | ,993 | ,000   | ,000     |
|                     | VASTY2(30) | ,503    | ,577     | ,759    | 1  | ,384 | 1,653  | ,534     |
|                     | VASTY2(31) | 1,212   | ,537     | 5,089   | 1  | ,024 | 3,360  | 1,172    |
|                     | VASTY2(32) | ,125    | ,656     | ,036    | 1  | ,849 | 1,133  | ,313     |
|                     | VASTY2(33) | -,105   | ,694     | ,023    | 1  | ,880 | ,900   | ,231     |
|                     | VASTY2(34) | -1,625  | 1,098    | 2,190   | 1  | ,139 | ,197   | ,023     |
|                     | VASTY2(35) | 1,117   | ,534     | 4,375   | 1  | ,036 | 3,054  | 1,073    |
|                     | Constant   | -4,276  | ,469     | 83,025  | 1  | ,000 | ,014   |          |

## Variables in the Equation

|                     |            | 95% C.I... |
|---------------------|------------|------------|
|                     |            | Upper      |
| Step 1 <sup>a</sup> | sv5        |            |
|                     | sv5(1)     | 1,394      |
|                     | sv5(2)     | 1,613      |
|                     | sv5(3)     | 1,477      |
|                     | sv5(4)     | 2,123      |
|                     | VASTY2     |            |
|                     | VASTY2(1)  | 4,757      |
|                     | VASTY2(2)  | 5,622      |
|                     | VASTY2(3)  | 1,724      |
|                     | VASTY2(4)  | 5,052      |
|                     | VASTY2(5)  | 2,898      |
|                     | VASTY2(6)  | .          |
|                     | VASTY2(7)  | 7,273      |
|                     | VASTY2(8)  | 4,577      |
|                     | VASTY2(9)  | 4,290      |
|                     | VASTY2(10) | 10,893     |
|                     | VASTY2(11) | 11,734     |
|                     | VASTY2(12) | 2,233      |
|                     | VASTY2(13) | 2,912      |
|                     | VASTY2(14) | 3,584      |
|                     | VASTY2(15) | 3,456      |
|                     | VASTY2(16) | 4,932      |
|                     | VASTY2(17) | .          |
|                     | VASTY2(18) | .          |
|                     | VASTY2(19) | 1,955      |
|                     | VASTY2(20) | 2,741      |
|                     | VASTY2(21) | 2,587      |
|                     | VASTY2(22) | 5,444      |
|                     | VASTY2(23) | 13,590     |
|                     | VASTY2(24) | 9,982      |
|                     | VASTY2(25) | 5,794      |
|                     | VASTY2(26) | 3,701      |
|                     | VASTY2(27) | 1,493      |
|                     | VASTY2(28) | 2,146      |
|                     | VASTY2(29) | .          |
|                     | VASTY2(30) | 5,123      |
|                     | VASTY2(31) | 9,627      |
|                     | VASTY2(32) | 4,095      |
|                     | VASTY2(33) | 3,510      |
|                     | VASTY2(34) | 1,694      |
|                     | VASTY2(35) | 8,696      |
|                     | Constant   |            |

a. Variable(s) entered on step 1: sv5, VASTY2.

```
LOGISTIC REGRESSION VARIABLES handlt1
/METHOD=ENTER sv7 VASTY2
/CONTRAST (sv7)=Indicator(1)
/CONTRAST (VASTY2)=Indicator(1)
/PRINT=CI(95)
/CRITERIA=PIN(0.05) POUT(0.10) ITERATE(20) CUT(0.5).
```

## Block 1: Method = Enter

### Omnibus Tests of Model Coefficients

|        |       | Chi-square | df | Sig. |
|--------|-------|------------|----|------|
| Step 1 | Step  | 219,500    | 41 | ,000 |
|        | Block | 219,500    | 41 | ,000 |
|        | Model | 219,500    | 41 | ,000 |

### Model Summary

| Step | -2 Log likelihood    | Cox & Snell R Square | Nagelkerke R Square |
|------|----------------------|----------------------|---------------------|
| 1    | 2199,28 <sup>a</sup> | ,017                 | ,099                |

a. Estimation terminated at iteration number 20 because maximum iterations has been reached. Final solution cannot be found.

Classification Table<sup>a</sup>

|                    |                                |                           | Predicted                 |                      |
|--------------------|--------------------------------|---------------------------|---------------------------|----------------------|
|                    |                                |                           | 0 ingen eller en händelse | 1 mer än en händelse |
| Observed           | handlt1 händelse larger than 1 | 0 ingen eller en händelse | 12229                     | 0                    |
|                    |                                | 1 mer än en händelse      | 246                       | 0                    |
| Overall Percentage |                                |                           |                           |                      |

Classification Table<sup>a</sup>

|                    |                                |                           | Predicted          |
|--------------------|--------------------------------|---------------------------|--------------------|
|                    |                                |                           |                    |
| Observed           |                                |                           | Percentage Correct |
| Step 1             | handlt1 händelse larger than 1 | 0 ingen eller en händelse | 100,0              |
|                    |                                | 1 mer än en händelse      | ,0                 |
| Overall Percentage |                                |                           | 98,0               |

a. The cut value is ,500

Variables in the Equation

|                     |            | B       | S.E.     | Wald    | df | Sig. | Exp(B) | 95% C.I.<br>Lower |
|---------------------|------------|---------|----------|---------|----|------|--------|-------------------|
| Step 1 <sup>a</sup> | sv7        |         |          | 11,121  | 6  | ,085 |        |                   |
|                     | sv7(1)     | -,095   | ,265     | ,130    | 1  | ,719 | ,909   | ,541              |
|                     | sv7(2)     | ,002    | ,281     | ,000    | 1  | ,995 | 1,002  | ,577              |
|                     | sv7(3)     | ,059    | ,271     | ,048    | 1  | ,827 | 1,061  | ,623              |
|                     | sv7(4)     | -,039   | ,269     | ,021    | 1  | ,886 | ,962   | ,568              |
|                     | sv7(5)     | ,193    | ,247     | ,607    | 1  | ,436 | 1,213  | ,747              |
|                     | sv7(6)     | ,725    | ,278     | 6,787   | 1  | ,009 | 2,065  | 1,197             |
|                     | VASTY2     |         |          | 120,926 | 35 | ,000 |        |                   |
|                     | VASTY2(1)  | ,364    | ,578     | ,396    | 1  | ,529 | 1,439  | ,464              |
|                     | VASTY2(2)  | ,454    | ,559     | ,660    | 1  | ,417 | 1,575  | ,527              |
|                     | VASTY2(3)  | -1,603  | 1,098    | 2,131   | 1  | ,144 | ,201   | ,023              |
|                     | VASTY2(4)  | ,468    | ,576     | ,659    | 1  | ,417 | 1,596  | ,516              |
|                     | VASTY2(5)  | -,371   | ,737     | ,253    | 1  | ,615 | ,690   | ,163              |
|                     | VASTY2(6)  | -17,485 | 2098,395 | ,000    | 1  | ,993 | ,000   | ,000              |
|                     | VASTY2(7)  | ,922    | ,538     | 2,936   | 1  | ,087 | 2,514  | ,876              |
|                     | VASTY2(8)  | ,367    | ,593     | ,385    | 1  | ,535 | 1,444  | ,452              |
|                     | VASTY2(9)  | ,251    | ,611     | ,168    | 1  | ,681 | 1,285  | ,388              |
|                     | VASTY2(10) | 1,167   | ,519     | 5,065   | 1  | ,024 | 3,213  | 1,163             |
|                     | VASTY2(11) | 1,466   | ,504     | 8,452   | 1  | ,004 | 4,331  | 1,612             |
|                     | VASTY2(12) | -,768   | ,741     | 1,074   | 1  | ,300 | ,464   | ,109              |
|                     | VASTY2(13) | -,435   | ,654     | ,442    | 1  | ,506 | ,647   | ,180              |
|                     | VASTY2(14) | -,061   | ,617     | ,010    | 1  | ,921 | ,941   | ,281              |
|                     | VASTY2(15) | -,163   | ,623     | ,069    | 1  | ,793 | ,849   | ,251              |
|                     | VASTY2(16) | -,008   | ,743     | ,000    | 1  | ,991 | ,992   | ,231              |
|                     | VASTY2(17) | -16,945 | 2098,533 | ,000    | 1  | ,994 | ,000   | ,000              |
|                     | VASTY2(18) | -16,806 | 2112,381 | ,000    | 1  | ,994 | ,000   | ,000              |
|                     | VASTY2(19) | -1,493  | 1,114    | 1,798   | 1  | ,180 | ,225   | ,025              |
|                     | VASTY2(20) | -,619   | ,743     | ,694    | 1  | ,405 | ,538   | ,125              |
|                     | VASTY2(21) | -,502   | ,735     | ,467    | 1  | ,494 | ,605   | ,143              |

## Variables in the Equation

|                     |            | 95% C.I... |
|---------------------|------------|------------|
|                     |            | Upper      |
| Step 1 <sup>a</sup> | sv7        |            |
|                     | sv7(1)     | 1,527      |
|                     | sv7(2)     | 1,739      |
|                     | sv7(3)     | 1,806      |
|                     | sv7(4)     | 1,630      |
|                     | sv7(5)     | 1,969      |
|                     | sv7(6)     | 3,563      |
|                     | VASTY2     |            |
|                     | VASTY2(1)  | 4,467      |
|                     | VASTY2(2)  | 4,707      |
|                     | VASTY2(3)  | 1,732      |
|                     | VASTY2(4)  | 4,936      |
|                     | VASTY2(5)  | 2,926      |
|                     | VASTY2(6)  | .          |
|                     | VASTY2(7)  | 7,217      |
|                     | VASTY2(8)  | 4,613      |
|                     | VASTY2(9)  | 4,252      |
|                     | VASTY2(10) | 8,882      |
|                     | VASTY2(11) | 11,633     |
|                     | VASTY2(12) | 1,982      |
|                     | VASTY2(13) | 2,332      |
|                     | VASTY2(14) | 3,154      |
|                     | VASTY2(15) | 2,878      |
|                     | VASTY2(16) | 4,251      |
|                     | VASTY2(17) | .          |
|                     | VASTY2(18) | .          |
|                     | VASTY2(19) | 1,992      |
|                     | VASTY2(20) | 2,311      |
|                     | VASTY2(21) | 2,555      |

Variables in the Equation

|            | B       | S.E.     | Wald   | df | Sig. | Exp(B) | 95% C.I. |
|------------|---------|----------|--------|----|------|--------|----------|
|            |         |          |        |    |      |        | Lower    |
| VASTY2(22) | ,587    | ,563     | 1,088  | 1  | ,297 | 1,799  | ,597     |
| VASTY2(23) | 1,633   | ,498     | 10,751 | 1  | ,001 | 5,120  | 1,929    |
| VASTY2(24) | 1,223   | ,512     | 5,712  | 1  | ,017 | 3,398  | 1,246    |
| VASTY2(25) | ,597    | ,593     | 1,013  | 1  | ,314 | 1,817  | ,568     |
| VASTY2(26) | -,060   | ,676     | ,008   | 1  | ,930 | ,942   | ,250     |
| VASTY2(27) | -1,952  | 1,104    | 3,123  | 1  | ,077 | ,142   | ,016     |
| VASTY2(28) | -1,788  | 1,117    | 2,561  | 1  | ,109 | ,167   | ,019     |
| VASTY2(29) | -17,601 | 2099,708 | ,000   | 1  | ,993 | ,000   | ,000     |
| VASTY2(30) | ,504    | ,577     | ,763   | 1  | ,383 | 1,655  | ,534     |
| VASTY2(31) | 1,211   | ,538     | 5,066  | 1  | ,024 | 3,357  | 1,169    |
| VASTY2(32) | ,134    | ,660     | ,041   | 1  | ,839 | 1,143  | ,314     |
| VASTY2(33) | -,093   | ,700     | ,018   | 1  | ,894 | ,911   | ,231     |
| VASTY2(34) | -1,645  | 1,098    | 2,243  | 1  | ,134 | ,193   | ,022     |
| VASTY2(35) | 1,051   | ,535     | 3,864  | 1  | ,049 | 2,861  | 1,003    |
| Constant   | -4,309  | ,480     | 80,714 | 1  | ,000 | ,013   |          |

Variables in the Equation

|            | 95% C.I. |
|------------|----------|
|            | Upper    |
| VASTY2(22) | 5,423    |
| VASTY2(23) | 13,591   |
| VASTY2(24) | 9,264    |
| VASTY2(25) | 5,808    |
| VASTY2(26) | 3,547    |
| VASTY2(27) | 1,237    |
| VASTY2(28) | 1,494    |
| VASTY2(29) | .        |
| VASTY2(30) | 5,131    |
| VASTY2(31) | 9,639    |
| VASTY2(32) | 4,170    |
| VASTY2(33) | 3,593    |
| VASTY2(34) | 1,661    |
| VASTY2(35) | 8,163    |
| Constant   |          |

a. Variable(s) entered on step 1: sv7, VASTY2.

\*\*

LOGISTIC REGRESSION VARIABLES dod01



```

1
2
3 /METHOD=ENTER bv1 VASTY2
4 /CONTRAST (bv1)=Indicator(1)
5 /CONTRAST (VASTY2)=Indicator(1)
6 /PRINT=CI(95)
7
8 /CRITERIA=PIN(0.05) POUT(0.10) ITERATE(20) CUT(0.5) .
9

```

## Block 1: Method = Enter

### Omnibus Tests of Model Coefficients

|        |       | Chi-square | df | Sig. |
|--------|-------|------------|----|------|
| Step 1 | Step  | 724,914    | 37 | ,000 |
|        | Block | 724,914    | 37 | ,000 |
|        | Model | 724,914    | 37 | ,000 |

### Model Summary

| Step | -2 Log likelihood    | Cox & Snell R Square | Nagelkerke R Square |
|------|----------------------|----------------------|---------------------|
| 1    | 4299,93 <sup>a</sup> | ,056                 | ,170                |

a. Estimation terminated at iteration number 20 because maximum iterations has been reached. Final solution cannot be found.

### Classification Table<sup>a</sup>

| Observed           |                             | Predicted                   |                      |                    |       |
|--------------------|-----------------------------|-----------------------------|----------------------|--------------------|-------|
|                    |                             | dod01 dödsfall ja eller nej |                      | Percentage Correct |       |
|                    |                             | 0 inget dödsfall            | 1 minst ett dödsfall |                    |       |
| Step 1             | dod01 dödsfall ja eller nej | 0 inget dödsfall            | 11839                | 0                  | 100,0 |
|                    |                             | 1 minst ett dödsfall        | 636                  | 0                  | ,0    |
| Overall Percentage |                             |                             |                      |                    | 94,9  |

a. The cut value is ,500

## Variables in the Equation

|                     |            | B       | S.E.     | Wald    | df | Sig. | Exp(B) | 95% C.I. |
|---------------------|------------|---------|----------|---------|----|------|--------|----------|
|                     |            |         |          |         |    |      |        | Lower    |
| Step 1 <sup>a</sup> | bv1        |         |          | 22,134  | 2  | ,000 |        |          |
|                     | bv1(1)     | -,257   | ,129     | 3,959   | 1  | ,047 | ,774   | ,601     |
|                     | bv1(2)     | ,342    | ,097     | 12,446  | 1  | ,000 | 1,407  | 1,164    |
|                     | VASTY2     |         |          | 211,297 | 35 | ,000 |        |          |
|                     | VASTY2(1)  | ,597    | ,343     | 3,036   | 1  | ,081 | 1,817  | ,928     |
|                     | VASTY2(2)  | ,710    | ,335     | 4,494   | 1  | ,034 | 2,034  | 1,055    |
|                     | VASTY2(3)  | ,618    | ,335     | 3,404   | 1  | ,065 | 1,855  | ,962     |
|                     | VASTY2(4)  | ,020    | ,371     | ,003    | 1  | ,957 | 1,020  | ,493     |
|                     | VASTY2(5)  | -,856   | ,495     | 2,997   | 1  | ,083 | ,425   | ,161     |
|                     | VASTY2(6)  | -18,130 | 2100,109 | ,000    | 1  | ,993 | ,000   | ,000     |
|                     | VASTY2(7)  | 1,454   | ,310     | 21,969  | 1  | ,000 | 4,282  | 2,331    |
|                     | VASTY2(8)  | ,736    | ,332     | 4,911   | 1  | ,027 | 2,087  | 1,089    |
|                     | VASTY2(9)  | ,262    | ,362     | ,525    | 1  | ,469 | 1,300  | ,639     |
|                     | VASTY2(10) | ,716    | ,334     | 4,606   | 1  | ,032 | 2,046  | 1,064    |
|                     | VASTY2(11) | ,318    | ,357     | ,791    | 1  | ,374 | 1,374  | ,682     |
|                     | VASTY2(12) | 1,216   | ,315     | 14,887  | 1  | ,000 | 3,373  | 1,819    |
|                     | VASTY2(13) | 1,356   | ,311     | 19,014  | 1  | ,000 | 3,880  | 2,110    |
|                     | VASTY2(14) | ,687    | ,334     | 4,234   | 1  | ,040 | 1,989  | 1,033    |
|                     | VASTY2(15) | ,122    | ,369     | ,109    | 1  | ,742 | 1,130  | ,547     |
|                     | VASTY2(16) | -,905   | ,644     | 1,974   | 1  | ,160 | ,405   | ,115     |
|                     | VASTY2(17) | -17,967 | 2097,899 | ,000    | 1  | ,993 | ,000   | ,000     |
|                     | VASTY2(18) | -2,701  | 1,038    | 6,771   | 1  | ,009 | ,067   | ,009     |
|                     | VASTY2(19) | -2,459  | 1,041    | 5,580   | 1  | ,018 | ,085   | ,011     |
|                     | VASTY2(20) | -1,506  | ,642     | 5,495   | 1  | ,019 | ,222   | ,063     |
|                     | VASTY2(21) | ,502    | ,345     | 2,112   | 1  | ,146 | 1,652  | ,839     |
|                     | VASTY2(22) | 1,238   | ,322     | 14,823  | 1  | ,000 | 3,450  | 1,837    |
|                     | VASTY2(23) | ,542    | ,348     | 2,429   | 1  | ,119 | 1,720  | ,870     |
|                     | VASTY2(24) | 1,296   | ,312     | 17,212  | 1  | ,000 | 3,654  | 1,981    |
|                     | VASTY2(25) | -,214   | ,435     | ,242    | 1  | ,623 | ,807   | ,344     |
|                     | VASTY2(26) | -18,081 | 2348,740 | ,000    | 1  | ,994 | ,000   | ,000     |
|                     | VASTY2(27) | -18,116 | 2094,245 | ,000    | 1  | ,993 | ,000   | ,000     |
|                     | VASTY2(28) | -18,130 | 2674,028 | ,000    | 1  | ,995 | ,000   | ,000     |
|                     | VASTY2(29) | -18,057 | 2095,696 | ,000    | 1  | ,993 | ,000   | ,000     |
|                     | VASTY2(30) | -,076   | ,386     | ,038    | 1  | ,845 | ,927   | ,435     |
|                     | VASTY2(31) | -18,034 | 2092,698 | ,000    | 1  | ,993 | ,000   | ,000     |
|                     | VASTY2(32) | -1,953  | ,760     | 6,595   | 1  | ,010 | ,142   | ,032     |
|                     | VASTY2(33) | -2,673  | 1,038    | 6,628   | 1  | ,010 | ,069   | ,009     |
|                     | VASTY2(34) | ,433    | ,351     | 1,526   | 1  | ,217 | 1,542  | ,776     |
|                     | VASTY2(35) | -18,165 | 2257,371 | ,000    | 1  | ,994 | ,000   | ,000     |
|                     | Constant   | -3,204  | ,275     | 135,335 | 1  | ,000 | ,041   |          |

## Variables in the Equation

|                     |            | 95% C.I... |
|---------------------|------------|------------|
|                     |            | Upper      |
| Step 1 <sup>a</sup> | bv1        |            |
|                     | bv1(1)     | ,996       |
|                     | bv1(2)     | 1,701      |
|                     | VASTY2     |            |
|                     | VASTY2(1)  | 3,559      |
|                     | VASTY2(2)  | 3,920      |
|                     | VASTY2(3)  | 3,574      |
|                     | VASTY2(4)  | 2,113      |
|                     | VASTY2(5)  | 1,120      |
|                     | VASTY2(6)  | .          |
|                     | VASTY2(7)  | 7,867      |
|                     | VASTY2(8)  | 4,002      |
|                     | VASTY2(9)  | 2,643      |
|                     | VASTY2(10) | 3,933      |
|                     | VASTY2(11) | 2,768      |
|                     | VASTY2(12) | 6,256      |
|                     | VASTY2(13) | 7,138      |
|                     | VASTY2(14) | 3,828      |
|                     | VASTY2(15) | 2,330      |
|                     | VASTY2(16) | 1,429      |
|                     | VASTY2(17) | .          |
|                     | VASTY2(18) | ,513       |
|                     | VASTY2(19) | ,658       |
|                     | VASTY2(20) | ,781       |
|                     | VASTY2(21) | 3,251      |
|                     | VASTY2(22) | 6,481      |
|                     | VASTY2(23) | 3,400      |
|                     | VASTY2(24) | 6,739      |
|                     | VASTY2(25) | 1,894      |
|                     | VASTY2(26) | .          |
|                     | VASTY2(27) | .          |
|                     | VASTY2(28) | .          |
|                     | VASTY2(29) | .          |
|                     | VASTY2(30) | 1,976      |
|                     | VASTY2(31) | .          |
|                     | VASTY2(32) | ,630       |
|                     | VASTY2(33) | ,528       |
|                     | VASTY2(34) | 3,067      |
|                     | VASTY2(35) | .          |
|                     | Constant   |            |

a. Variable(s) entered on step 1: bv1, VASTY2.

LOGISTIC REGRESSION VARIABLES dod01  
 /METHOD=ENTER bv2 VASTY2  
 /CONTRAST (bv2)=Indicator(1)  
 /CONTRAST (VASTY2)=Indicator(1)  
 /PRINT=CI(95)  
 /CRITERIA=PIN(0.05) POUT(0.10) ITERATE(20) CUT(0.5).

## Block 1: Method = Enter

### Omnibus Tests of Model Coefficients

|        |       | Chi-square | df | Sig. |
|--------|-------|------------|----|------|
| Step 1 | Step  | 719,171    | 37 | ,000 |
|        | Block | 719,171    | 37 | ,000 |
|        | Model | 719,171    | 37 | ,000 |

### Model Summary

| Step | -2 Log likelihood    | Cox & Snell R Square | Nagelkerke R Square |
|------|----------------------|----------------------|---------------------|
| 1    | 4305,67 <sup>a</sup> | ,056                 | ,169                |

a. Estimation terminated at iteration number 20 because maximum iterations has been reached. Final solution cannot be found.

### Classification Table<sup>a</sup>

|                    |                             | Predicted                   |                      |                    |       |
|--------------------|-----------------------------|-----------------------------|----------------------|--------------------|-------|
|                    |                             | dod01 dödsfall ja eller nej |                      | Percentage Correct |       |
| Observed           |                             | 0 inget dödsfall            | 1 minst ett dödsfall |                    |       |
| Step 1             | dod01 dödsfall ja eller nej | 0 inget dödsfall            | 11839                | 0                  | 100,0 |
|                    |                             | 1 minst ett dödsfall        | 636                  | 0                  | ,0    |
| Overall Percentage |                             |                             |                      |                    | 94,9  |

a. The cut value is ,500

## Variables in the Equation

|                     |            | B       | S.E.     | Wald    | df | Sig. | Exp(B) | 95% C.I. |
|---------------------|------------|---------|----------|---------|----|------|--------|----------|
|                     |            |         |          |         |    |      |        | Lower    |
| Step 1 <sup>a</sup> | bv2        |         |          | 16,401  | 2  | ,000 |        |          |
|                     | bv2(1)     | -,135   | ,126     | 1,159   | 1  | ,282 | ,873   | ,683     |
|                     | bv2(2)     | ,293    | ,110     | 7,157   | 1  | ,007 | 1,341  | 1,082    |
|                     | VASTY2     |         |          | 216,449 | 35 | ,000 |        |          |
|                     | VASTY2(1)  | ,588    | ,343     | 2,943   | 1  | ,086 | 1,800  | ,920     |
|                     | VASTY2(2)  | ,713    | ,335     | 4,530   | 1  | ,033 | 2,040  | 1,058    |
|                     | VASTY2(3)  | ,667    | ,334     | 3,989   | 1  | ,046 | 1,948  | 1,012    |
|                     | VASTY2(4)  | ,057    | ,371     | ,023    | 1  | ,879 | 1,058  | ,512     |
|                     | VASTY2(5)  | -,846   | ,495     | 2,928   | 1  | ,087 | ,429   | ,163     |
|                     | VASTY2(6)  | -18,089 | 2102,200 | ,000    | 1  | ,993 | ,000   | ,000     |
|                     | VASTY2(7)  | 1,507   | ,309     | 23,789  | 1  | ,000 | 4,512  | 2,463    |
|                     | VASTY2(8)  | ,740    | ,332     | 4,967   | 1  | ,026 | 2,097  | 1,093    |
|                     | VASTY2(9)  | ,277    | ,362     | ,585    | 1  | ,444 | 1,319  | ,649     |
|                     | VASTY2(10) | ,726    | ,334     | 4,741   | 1  | ,029 | 2,067  | 1,075    |
|                     | VASTY2(11) | ,333    | ,357     | ,872    | 1  | ,350 | 1,396  | ,693     |
|                     | VASTY2(12) | 1,226   | ,315     | 15,131  | 1  | ,000 | 3,407  | 1,837    |
|                     | VASTY2(13) | 1,380   | ,311     | 19,697  | 1  | ,000 | 3,975  | 2,161    |
|                     | VASTY2(14) | ,704    | ,334     | 4,444   | 1  | ,035 | 2,022  | 1,051    |
|                     | VASTY2(15) | ,118    | ,370     | ,102    | 1  | ,749 | 1,126  | ,545     |
|                     | VASTY2(16) | -,884   | ,643     | 1,888   | 1  | ,169 | ,413   | ,117     |
|                     | VASTY2(17) | -17,963 | 2099,524 | ,000    | 1  | ,993 | ,000   | ,000     |
|                     | VASTY2(18) | -2,696  | 1,038    | 6,746   | 1  | ,009 | ,067   | ,009     |
|                     | VASTY2(19) | -2,518  | 1,040    | 5,866   | 1  | ,015 | ,081   | ,011     |
|                     | VASTY2(20) | -1,473  | ,642     | 5,267   | 1  | ,022 | ,229   | ,065     |
|                     | VASTY2(21) | ,509    | ,345     | 2,171   | 1  | ,141 | 1,664  | ,845     |
|                     | VASTY2(22) | 1,240   | ,322     | 14,832  | 1  | ,000 | 3,455  | 1,838    |
|                     | VASTY2(23) | ,535    | ,348     | 2,364   | 1  | ,124 | 1,707  | ,863     |
|                     | VASTY2(24) | 1,327   | ,312     | 18,094  | 1  | ,000 | 3,771  | 2,046    |
|                     | VASTY2(25) | -,207   | ,435     | ,227    | 1  | ,634 | ,813   | ,347     |
|                     | VASTY2(26) | -18,071 | 2350,974 | ,000    | 1  | ,994 | ,000   | ,000     |
|                     | VASTY2(27) | -18,100 | 2096,455 | ,000    | 1  | ,993 | ,000   | ,000     |
|                     | VASTY2(28) | -18,120 | 2675,298 | ,000    | 1  | ,995 | ,000   | ,000     |
|                     | VASTY2(29) | -18,037 | 2096,602 | ,000    | 1  | ,993 | ,000   | ,000     |
|                     | VASTY2(30) | -,060   | ,386     | ,024    | 1  | ,877 | ,942   | ,442     |
|                     | VASTY2(31) | -18,023 | 2095,727 | ,000    | 1  | ,993 | ,000   | ,000     |
|                     | VASTY2(32) | -1,954  | ,760     | 6,611   | 1  | ,010 | ,142   | ,032     |
|                     | VASTY2(33) | -2,670  | 1,038    | 6,616   | 1  | ,010 | ,069   | ,009     |
|                     | VASTY2(34) | ,442    | ,351     | 1,588   | 1  | ,208 | 1,556  | ,782     |
|                     | VASTY2(35) | -18,119 | 2259,904 | ,000    | 1  | ,994 | ,000   | ,000     |
|                     | Constant   | -3,248  | ,282     | 132,759 | 1  | ,000 | ,039   |          |

## Variables in the Equation

|                     |            | 95% C.I... |
|---------------------|------------|------------|
|                     |            | Upper      |
| Step 1 <sup>a</sup> | bv2        |            |
|                     | bv2(1)     | 1,117      |
|                     | bv2(2)     | 1,662      |
|                     | VASTY2     |            |
|                     | VASTY2(1)  | 3,525      |
|                     | VASTY2(2)  | 3,932      |
|                     | VASTY2(3)  | 3,749      |
|                     | VASTY2(4)  | 2,189      |
|                     | VASTY2(5)  | 1,131      |
|                     | VASTY2(6)  | .          |
|                     | VASTY2(7)  | 8,267      |
|                     | VASTY2(8)  | 4,021      |
|                     | VASTY2(9)  | 2,681      |
|                     | VASTY2(10) | 3,974      |
|                     | VASTY2(11) | 2,810      |
|                     | VASTY2(12) | 6,318      |
|                     | VASTY2(13) | 7,310      |
|                     | VASTY2(14) | 3,889      |
|                     | VASTY2(15) | 2,323      |
|                     | VASTY2(16) | 1,458      |
|                     | VASTY2(17) | .          |
|                     | VASTY2(18) | ,516       |
|                     | VASTY2(19) | ,619       |
|                     | VASTY2(20) | ,806       |
|                     | VASTY2(21) | 3,274      |
|                     | VASTY2(22) | 6,493      |
|                     | VASTY2(23) | 3,374      |
|                     | VASTY2(24) | 6,951      |
|                     | VASTY2(25) | 1,907      |
|                     | VASTY2(26) | .          |
|                     | VASTY2(27) | .          |
|                     | VASTY2(28) | .          |
|                     | VASTY2(29) | .          |
|                     | VASTY2(30) | 2,007      |
|                     | VASTY2(31) | .          |
|                     | VASTY2(32) | ,628       |
|                     | VASTY2(33) | ,530       |
|                     | VASTY2(34) | 3,093      |
|                     | VASTY2(35) | .          |
|                     | Constant   |            |

a. Variable(s) entered on step 1: bv2, VASTY2.

LOGISTIC REGRESSION VARIABLES dod01  
 /METHOD=ENTER bv3 VASTY2  
 /CONTRAST (bv3)=Indicator(1)  
 /CONTRAST (VASTY2)=Indicator(1)  
 /PRINT=CI(95)  
 /CRITERIA=PIN(0.05) POUT(0.10) ITERATE(20) CUT(0.5).

## Block 1: Method = Enter

### Omnibus Tests of Model Coefficients

|        |       | Chi-square | df | Sig. |
|--------|-------|------------|----|------|
| Step 1 | Step  | 717,578    | 37 | ,000 |
|        | Block | 717,578    | 37 | ,000 |
|        | Model | 717,578    | 37 | ,000 |

### Model Summary

| Step | -2 Log likelihood    | Cox & Snell R Square | Nagelkerke R Square |
|------|----------------------|----------------------|---------------------|
| 1    | 4307,26 <sup>a</sup> | ,056                 | ,169                |

a. Estimation terminated at iteration number 20 because maximum iterations has been reached. Final solution cannot be found.

### Classification Table<sup>a</sup>

|                    |                             | Predicted                   |                      |                    |       |
|--------------------|-----------------------------|-----------------------------|----------------------|--------------------|-------|
|                    |                             | dod01 dödsfall ja eller nej |                      | Percentage Correct |       |
| Observed           |                             | 0 inget dödsfall            | 1 minst ett dödsfall |                    |       |
| Step 1             | dod01 dödsfall ja eller nej | 0 inget dödsfall            | 11839                | 0                  | 100,0 |
|                    |                             | 1 minst ett dödsfall        | 636                  | 0                  | ,0    |
| Overall Percentage |                             |                             |                      |                    | 94,9  |

a. The cut value is ,500

## Variables in the Equation

|                     |            | B       | S.E.     | Wald    | df | Sig. | Exp(B) | 95% C.I. |
|---------------------|------------|---------|----------|---------|----|------|--------|----------|
|                     |            |         |          |         |    |      |        | Lower    |
| Step 1 <sup>a</sup> | bv3        |         |          | 15,036  | 2  | ,001 |        |          |
|                     | bv3(1)     | -,380   | ,199     | 3,646   | 1  | ,056 | ,684   | ,463     |
|                     | bv3(2)     | ,373    | ,116     | 10,375  | 1  | ,001 | 1,452  | 1,157    |
|                     | VASTY2     |         |          | 212,822 | 35 | ,000 |        |          |
|                     | VASTY2(1)  | ,641    | ,343     | 3,494   | 1  | ,062 | 1,898  | ,969     |
|                     | VASTY2(2)  | ,753    | ,334     | 5,064   | 1  | ,024 | 2,122  | 1,102    |
|                     | VASTY2(3)  | ,680    | ,335     | 4,128   | 1  | ,042 | 1,973  | 1,024    |
|                     | VASTY2(4)  | ,064    | ,371     | ,030    | 1  | ,862 | 1,066  | ,515     |
|                     | VASTY2(5)  | -,816   | ,494     | 2,724   | 1  | ,099 | ,442   | ,168     |
|                     | VASTY2(6)  | -18,094 | 2101,047 | ,000    | 1  | ,993 | ,000   | ,000     |
|                     | VASTY2(7)  | 1,475   | ,313     | 22,211  | 1  | ,000 | 4,369  | 2,366    |
|                     | VASTY2(8)  | ,790    | ,331     | 5,680   | 1  | ,017 | 2,203  | 1,151    |
|                     | VASTY2(9)  | ,321    | ,361     | ,788    | 1  | ,375 | 1,378  | ,679     |
|                     | VASTY2(10) | ,769    | ,333     | 5,331   | 1  | ,021 | 2,157  | 1,123    |
|                     | VASTY2(11) | ,350    | ,357     | ,959    | 1  | ,327 | 1,419  | ,705     |
|                     | VASTY2(12) | 1,275   | ,314     | 16,435  | 1  | ,000 | 3,577  | 1,932    |
|                     | VASTY2(13) | 1,457   | ,309     | 22,198  | 1  | ,000 | 4,291  | 2,341    |
|                     | VASTY2(14) | ,747    | ,333     | 5,019   | 1  | ,025 | 2,110  | 1,098    |
|                     | VASTY2(15) | ,167    | ,369     | ,206    | 1  | ,650 | 1,182  | ,574     |
|                     | VASTY2(16) | -,915   | ,645     | 2,017   | 1  | ,156 | ,400   | ,113     |
|                     | VASTY2(17) | -17,981 | 2099,926 | ,000    | 1  | ,993 | ,000   | ,000     |
|                     | VASTY2(18) | -2,700  | 1,038    | 6,765   | 1  | ,009 | ,067   | ,009     |
|                     | VASTY2(19) | -2,448  | 1,044    | 5,504   | 1  | ,019 | ,086   | ,011     |
|                     | VASTY2(20) | -1,470  | ,642     | 5,239   | 1  | ,022 | ,230   | ,065     |
|                     | VASTY2(21) | ,534    | ,345     | 2,399   | 1  | ,121 | 1,707  | ,868     |
|                     | VASTY2(22) | 1,173   | ,321     | 13,390  | 1  | ,000 | 3,232  | 1,724    |
|                     | VASTY2(23) | ,542    | ,348     | 2,429   | 1  | ,119 | 1,719  | ,870     |
|                     | VASTY2(24) | 1,339   | ,312     | 18,387  | 1  | ,000 | 3,814  | 2,068    |
|                     | VASTY2(25) | -,201   | ,435     | ,214    | 1  | ,644 | ,818   | ,349     |
|                     | VASTY2(26) | -18,030 | 2351,071 | ,000    | 1  | ,994 | ,000   | ,000     |
|                     | VASTY2(27) | -18,052 | 2095,802 | ,000    | 1  | ,993 | ,000   | ,000     |
|                     | VASTY2(28) | -18,045 | 2677,010 | ,000    | 1  | ,995 | ,000   | ,000     |
|                     | VASTY2(29) | -18,030 | 2099,078 | ,000    | 1  | ,993 | ,000   | ,000     |
|                     | VASTY2(30) | -,063   | ,386     | ,027    | 1  | ,871 | ,939   | ,441     |
|                     | VASTY2(31) | -18,004 | 2092,378 | ,000    | 1  | ,993 | ,000   | ,000     |
|                     | VASTY2(32) | -1,931  | ,761     | 6,434   | 1  | ,011 | ,145   | ,033     |
|                     | VASTY2(33) | -2,636  | 1,039    | 6,441   | 1  | ,011 | ,072   | ,009     |
|                     | VASTY2(34) | ,454    | ,350     | 1,681   | 1  | ,195 | 1,575  | ,793     |
|                     | VASTY2(35) | -18,134 | 2257,580 | ,000    | 1  | ,994 | ,000   | ,000     |
|                     | Constant   | -3,202  | ,273     | 137,651 | 1  | ,000 | ,041   |          |



## Variables in the Equation

|                     |            | 95% C.I... |
|---------------------|------------|------------|
|                     |            | Upper      |
| Step 1 <sup>a</sup> | bv3        |            |
|                     | bv3(1)     | 1,010      |
|                     | bv3(2)     | 1,822      |
|                     | VASTY2     |            |
|                     | VASTY2(1)  | 3,716      |
|                     | VASTY2(2)  | 4,088      |
|                     | VASTY2(3)  | 3,802      |
|                     | VASTY2(4)  | 2,208      |
|                     | VASTY2(5)  | 1,165      |
|                     | VASTY2(6)  | .          |
|                     | VASTY2(7)  | 8,068      |
|                     | VASTY2(8)  | 4,219      |
|                     | VASTY2(9)  | 2,799      |
|                     | VASTY2(10) | 4,141      |
|                     | VASTY2(11) | 2,856      |
|                     | VASTY2(12) | 6,625      |
|                     | VASTY2(13) | 7,866      |
|                     | VASTY2(14) | 4,056      |
|                     | VASTY2(15) | 2,437      |
|                     | VASTY2(16) | 1,416      |
|                     | VASTY2(17) | .          |
|                     | VASTY2(18) | ,514       |
|                     | VASTY2(19) | ,668       |
|                     | VASTY2(20) | ,810       |
|                     | VASTY2(21) | 3,356      |
|                     | VASTY2(22) | 6,059      |
|                     | VASTY2(23) | 3,399      |
|                     | VASTY2(24) | 7,033      |
|                     | VASTY2(25) | 1,918      |
|                     | VASTY2(26) | .          |
|                     | VASTY2(27) | .          |
|                     | VASTY2(28) | .          |
|                     | VASTY2(29) | .          |
|                     | VASTY2(30) | 2,001      |
|                     | VASTY2(31) | .          |
|                     | VASTY2(32) | ,645       |
|                     | VASTY2(33) | ,549       |
|                     | VASTY2(34) | 3,130      |
|                     | VASTY2(35) | .          |
|                     | Constant   |            |

a. Variable(s) entered on step 1: bv3, VASTY2.

```

LOGISTIC REGRESSION VARIABLES dod01
/METHOD=ENTER sv3 VASTY2
/CONTRAST (sv3)=Indicator(1)
/CONTRAST (VASTY2)=Indicator(1)
/PRINT=CI(95)
/CRITERIA=PIN(0.05) POUT(0.10) ITERATE(20) CUT(0.5).

```

## Block 1: Method = Enter

### Omnibus Tests of Model Coefficients

|        |       | Chi-square | df | Sig. |
|--------|-------|------------|----|------|
| Step 1 | Step  | 709,696    | 37 | ,000 |
|        | Block | 709,696    | 37 | ,000 |
|        | Model | 709,696    | 37 | ,000 |

### Model Summary

| Step | -2 Log likelihood    | Cox & Snell R Square | Nagelkerke R Square |
|------|----------------------|----------------------|---------------------|
| 1    | 4315,15 <sup>a</sup> | ,055                 | ,167                |

a. Estimation terminated at iteration number 20 because maximum iterations has been reached. Final solution cannot be found.

### Classification Table<sup>a</sup>

|                    |                             | Predicted                   |                      |                    |       |
|--------------------|-----------------------------|-----------------------------|----------------------|--------------------|-------|
|                    |                             | dod01 dödsfall ja eller nej |                      | Percentage Correct |       |
| Observed           |                             | 0 inget dödsfall            | 1 minst ett dödsfall |                    |       |
| Step 1             | dod01 dödsfall ja eller nej | 0 inget dödsfall            | 11839                | 0                  | 100,0 |
|                    |                             | 1 minst ett dödsfall        | 636                  | 0                  | ,0    |
| Overall Percentage |                             |                             |                      |                    | 94,9  |

a. The cut value is ,500

Variables in the Equation

|                     |            | B       | S.E.     | Wald    | df | Sig. | Exp(B) | 95% C.I. |
|---------------------|------------|---------|----------|---------|----|------|--------|----------|
|                     |            |         |          |         |    |      |        | Lower    |
| Step 1 <sup>a</sup> | sv3        |         |          | 7,118   | 2  | ,028 |        |          |
|                     | sv3(1)     | -,161   | ,116     | 1,927   | 1  | ,165 | ,851   | ,679     |
|                     | sv3(2)     | ,174    | ,110     | 2,506   | 1  | ,113 | 1,190  | ,959     |
|                     | VASTY2     |         |          | 219,886 | 35 | ,000 |        |          |
|                     | VASTY2(1)  | ,572    | ,344     | 2,770   | 1  | ,096 | 1,771  | ,903     |
|                     | VASTY2(2)  | ,654    | ,338     | 3,741   | 1  | ,053 | 1,923  | ,991     |
|                     | VASTY2(3)  | ,884    | ,331     | 7,116   | 1  | ,008 | 2,421  | 1,264    |
|                     | VASTY2(4)  | ,232    | ,369     | ,395    | 1  | ,529 | 1,261  | ,612     |
|                     | VASTY2(5)  | -,675   | ,496     | 1,854   | 1  | ,173 | ,509   | ,193     |
|                     | VASTY2(6)  | -18,126 | 2105,897 | ,000    | 1  | ,993 | ,000   | ,000     |
|                     | VASTY2(7)  | 1,739   | ,306     | 32,391  | 1  | ,000 | 5,690  | 3,127    |
|                     | VASTY2(8)  | ,911    | ,332     | 7,529   | 1  | ,006 | 2,487  | 1,297    |
|                     | VASTY2(9)  | ,391    | ,361     | 1,172   | 1  | ,279 | 1,478  | ,729     |
|                     | VASTY2(10) | ,669    | ,338     | 3,920   | 1  | ,048 | 1,952  | 1,007    |
|                     | VASTY2(11) | ,381    | ,357     | 1,142   | 1  | ,285 | 1,464  | ,728     |
|                     | VASTY2(12) | 1,196   | ,318     | 14,164  | 1  | ,000 | 3,305  | 1,773    |
|                     | VASTY2(13) | 1,407   | ,314     | 20,080  | 1  | ,000 | 4,085  | 2,207    |
|                     | VASTY2(14) | ,725    | ,335     | 4,695   | 1  | ,030 | 2,065  | 1,072    |
|                     | VASTY2(15) | ,083    | ,372     | ,050    | 1  | ,824 | 1,086  | ,524     |
|                     | VASTY2(16) | -,855   | ,644     | 1,763   | 1  | ,184 | ,425   | ,121     |
|                     | VASTY2(17) | -17,931 | 2101,558 | ,000    | 1  | ,993 | ,000   | ,000     |
|                     | VASTY2(18) | -2,502  | 1,041    | 5,779   | 1  | ,016 | ,082   | ,011     |
|                     | VASTY2(19) | -2,510  | 1,041    | 5,812   | 1  | ,016 | ,081   | ,011     |
|                     | VASTY2(20) | -1,444  | ,642     | 5,055   | 1  | ,025 | ,236   | ,067     |
|                     | VASTY2(21) | ,617    | ,345     | 3,193   | 1  | ,074 | 1,854  | ,942     |
|                     | VASTY2(22) | 1,126   | ,320     | 12,383  | 1  | ,000 | 3,084  | 1,647    |
|                     | VASTY2(23) | ,551    | ,348     | 2,512   | 1  | ,113 | 1,735  | ,878     |
|                     | VASTY2(24) | 1,418   | ,311     | 20,832  | 1  | ,000 | 4,129  | 2,246    |
|                     | VASTY2(25) | -,153   | ,436     | ,123    | 1  | ,726 | ,858   | ,365     |
|                     | VASTY2(26) | -17,994 | 2353,533 | ,000    | 1  | ,994 | ,000   | ,000     |
|                     | VASTY2(27) | -18,075 | 2099,032 | ,000    | 1  | ,993 | ,000   | ,000     |
|                     | VASTY2(28) | -18,145 | 2679,357 | ,000    | 1  | ,995 | ,000   | ,000     |
|                     | VASTY2(29) | -18,150 | 2100,910 | ,000    | 1  | ,993 | ,000   | ,000     |
|                     | VASTY2(30) | ,067    | ,387     | ,030    | 1  | ,862 | 1,069  | ,501     |
|                     | VASTY2(31) | -17,833 | 2100,466 | ,000    | 1  | ,993 | ,000   | ,000     |
|                     | VASTY2(32) | -1,800  | ,764     | 5,550   | 1  | ,018 | ,165   | ,037     |
|                     | VASTY2(33) | -2,504  | 1,041    | 5,787   | 1  | ,016 | ,082   | ,011     |
|                     | VASTY2(34) | ,484    | ,350     | 1,910   | 1  | ,167 | 1,623  | ,817     |
|                     | VASTY2(35) | -17,998 | 2261,672 | ,000    | 1  | ,994 | ,000   | ,000     |
|                     | Constant   | -3,227  | ,277     | 135,542 | 1  | ,000 | ,040   |          |

## Variables in the Equation

|                     |            | 95% C.I... |
|---------------------|------------|------------|
|                     |            | Upper      |
| Step 1 <sup>a</sup> | sv3        |            |
|                     | sv3(1)     | 1,068      |
|                     | sv3(2)     | 1,476      |
|                     | VASTY2     |            |
|                     | VASTY2(1)  | 3,473      |
|                     | VASTY2(2)  | 3,729      |
|                     | VASTY2(3)  | 4,635      |
|                     | VASTY2(4)  | 2,601      |
|                     | VASTY2(5)  | 1,345      |
|                     | VASTY2(6)  | .          |
|                     | VASTY2(7)  | 10,355     |
|                     | VASTY2(8)  | 4,769      |
|                     | VASTY2(9)  | 2,997      |
|                     | VASTY2(10) | 3,784      |
|                     | VASTY2(11) | 2,946      |
|                     | VASTY2(12) | 6,161      |
|                     | VASTY2(13) | 7,561      |
|                     | VASTY2(14) | 3,979      |
|                     | VASTY2(15) | 2,254      |
|                     | VASTY2(16) | 1,502      |
|                     | VASTY2(17) | .          |
|                     | VASTY2(18) | ,630       |
|                     | VASTY2(19) | ,625       |
|                     | VASTY2(20) | ,831       |
|                     | VASTY2(21) | 3,649      |
|                     | VASTY2(22) | 5,776      |
|                     | VASTY2(23) | 3,430      |
|                     | VASTY2(24) | 7,592      |
|                     | VASTY2(25) | 2,015      |
|                     | VASTY2(26) | .          |
|                     | VASTY2(27) | .          |
|                     | VASTY2(28) | .          |
|                     | VASTY2(29) | .          |
|                     | VASTY2(30) | 2,282      |
|                     | VASTY2(31) | .          |
|                     | VASTY2(32) | ,739       |
|                     | VASTY2(33) | ,629       |
|                     | VASTY2(34) | 3,226      |
|                     | VASTY2(35) | .          |
|                     | Constant   |            |

a. Variable(s) entered on step 1: sv3, VASTY2.

```

LOGISTIC REGRESSION VARIABLES dod01
/METHOD=ENTER sv5 VASTY2
/CONTRAST (sv5)=Indicator(1)
/CONTRAST (VASTY2)=Indicator(1)
/PRINT=CI(95)
/CRITERIA=PIN(0.05) POUT(0.10) ITERATE(20) CUT(0.5).
    
```

**Block 1: Method = Enter**

**Omnibus Tests of Model Coefficients**

|        |       | Chi-square | df | Sig. |
|--------|-------|------------|----|------|
| Step 1 | Step  | 709,941    | 39 | ,000 |
|        | Block | 709,941    | 39 | ,000 |
|        | Model | 709,941    | 39 | ,000 |

**Model Summary**

| Step | -2 Log likelihood    | Cox & Snell R Square | Nagelkerke R Square |
|------|----------------------|----------------------|---------------------|
| 1    | 4314,90 <sup>a</sup> | ,055                 | ,167                |

a. Estimation terminated at iteration number 20 because maximum iterations has been reached. Final solution cannot be found.

**Classification Table<sup>a</sup>**

|                    |                             | Predicted                   |                      |                    |       |
|--------------------|-----------------------------|-----------------------------|----------------------|--------------------|-------|
|                    |                             | dod01 dödsfall ja eller nej |                      | Percentage Correct |       |
| Observed           |                             | 0 inget dödsfall            | 1 minst ett dödsfall |                    |       |
| Step 1             | dod01 dödsfall ja eller nej | 0 inget dödsfall            | 11839                | 0                  | 100,0 |
|                    |                             | 1 minst ett dödsfall        | 636                  | 0                  | ,0    |
| Overall Percentage |                             |                             |                      |                    | 94,9  |

a. The cut value is ,500

## Variables in the Equation

|                     |            | B       | S.E.     | Wald    | df | Sig. | Exp(B) | 95% C.I. |
|---------------------|------------|---------|----------|---------|----|------|--------|----------|
|                     |            |         |          |         |    |      |        | Lower    |
| Step 1 <sup>a</sup> | sv5        |         |          | 7,325   | 4  | ,120 |        |          |
|                     | sv5(1)     | -,200   | ,152     | 1,738   | 1  | ,187 | ,819   | ,608     |
|                     | sv5(2)     | -,073   | ,144     | ,257    | 1  | ,612 | ,929   | ,700     |
|                     | sv5(3)     | ,089    | ,129     | ,476    | 1  | ,490 | 1,093  | ,849     |
|                     | sv5(4)     | ,225    | ,146     | 2,397   | 1  | ,122 | 1,253  | ,942     |
|                     | VASTY2     |         |          | 215,509 | 35 | ,000 |        |          |
|                     | VASTY2(1)  | ,573    | ,344     | 2,776   | 1  | ,096 | 1,773  | ,904     |
|                     | VASTY2(2)  | ,629    | ,341     | 3,407   | 1  | ,065 | 1,875  | ,962     |
|                     | VASTY2(3)  | ,877    | ,331     | 7,006   | 1  | ,008 | 2,404  | 1,256    |
|                     | VASTY2(4)  | ,235    | ,369     | ,405    | 1  | ,524 | 1,265  | ,614     |
|                     | VASTY2(5)  | -,677   | ,496     | 1,867   | 1  | ,172 | ,508   | ,192     |
|                     | VASTY2(6)  | -18,169 | 2105,569 | ,000    | 1  | ,993 | ,000   | ,000     |
|                     | VASTY2(7)  | 1,733   | ,305     | 32,197  | 1  | ,000 | 5,659  | 3,110    |
|                     | VASTY2(8)  | ,908    | ,332     | 7,458   | 1  | ,006 | 2,479  | 1,292    |
|                     | VASTY2(9)  | ,388    | ,361     | 1,159   | 1  | ,282 | 1,475  | ,727     |
|                     | VASTY2(10) | ,640    | ,341     | 3,517   | 1  | ,061 | 1,896  | ,972     |
|                     | VASTY2(11) | ,375    | ,357     | 1,107   | 1  | ,293 | 1,456  | ,723     |
|                     | VASTY2(12) | 1,184   | ,319     | 13,807  | 1  | ,000 | 3,266  | 1,749    |
|                     | VASTY2(13) | 1,379   | ,318     | 18,824  | 1  | ,000 | 3,970  | 2,129    |
|                     | VASTY2(14) | ,711    | ,336     | 4,486   | 1  | ,034 | 2,037  | 1,054    |
|                     | VASTY2(15) | ,067    | ,374     | ,032    | 1  | ,858 | 1,069  | ,514     |
|                     | VASTY2(16) | -,870   | ,644     | 1,822   | 1  | ,177 | ,419   | ,119     |
|                     | VASTY2(17) | -17,930 | 2101,497 | ,000    | 1  | ,993 | ,000   | ,000     |
|                     | VASTY2(18) | -2,472  | 1,044    | 5,611   | 1  | ,018 | ,084   | ,011     |
|                     | VASTY2(19) | -2,476  | 1,044    | 5,626   | 1  | ,018 | ,084   | ,011     |
|                     | VASTY2(20) | -1,467  | ,643     | 5,197   | 1  | ,023 | ,231   | ,065     |
|                     | VASTY2(21) | ,613    | ,346     | 3,145   | 1  | ,076 | 1,846  | ,938     |
|                     | VASTY2(22) | 1,123   | ,320     | 12,309  | 1  | ,000 | 3,074  | 1,642    |
|                     | VASTY2(23) | ,551    | ,348     | 2,511   | 1  | ,113 | 1,735  | ,878     |
|                     | VASTY2(24) | 1,407   | ,311     | 20,437  | 1  | ,000 | 4,083  | 2,219    |
|                     | VASTY2(25) | -,154   | ,436     | ,125    | 1  | ,723 | ,857   | ,365     |
|                     | VASTY2(26) | -17,995 | 2353,519 | ,000    | 1  | ,994 | ,000   | ,000     |
|                     | VASTY2(27) | -18,092 | 2098,489 | ,000    | 1  | ,993 | ,000   | ,000     |
|                     | VASTY2(28) | -18,197 | 2679,174 | ,000    | 1  | ,995 | ,000   | ,000     |
|                     | VASTY2(29) | -18,205 | 2100,873 | ,000    | 1  | ,993 | ,000   | ,000     |
|                     | VASTY2(30) | ,068    | ,387     | ,031    | 1  | ,860 | 1,071  | ,502     |
|                     | VASTY2(31) | -17,813 | 2100,234 | ,000    | 1  | ,993 | ,000   | ,000     |
|                     | VASTY2(32) | -1,771  | ,767     | 5,323   | 1  | ,021 | ,170   | ,038     |
|                     | VASTY2(33) | -2,471  | 1,044    | 5,601   | 1  | ,018 | ,085   | ,011     |
|                     | VASTY2(34) | ,480    | ,350     | 1,879   | 1  | ,170 | 1,617  | ,813     |
|                     | VASTY2(35) | -17,988 | 2261,427 | ,000    | 1  | ,994 | ,000   | ,000     |
|                     | Constant   | -3,221  | ,284     | 128,279 | 1  | ,000 | ,040   |          |

Variables in the Equation

|                     |            | 95% C.I... |
|---------------------|------------|------------|
|                     |            | Upper      |
| Step 1 <sup>a</sup> | sv5        |            |
|                     | sv5(1)     | 1,102      |
|                     | sv5(2)     | 1,233      |
|                     | sv5(3)     | 1,408      |
|                     | sv5(4)     | 1,666      |
|                     | VASTY2     |            |
|                     | VASTY2(1)  | 3,477      |
|                     | VASTY2(2)  | 3,656      |
|                     | VASTY2(3)  | 4,602      |
|                     | VASTY2(4)  | 2,608      |
|                     | VASTY2(5)  | 1,342      |
|                     | VASTY2(6)  | .          |
|                     | VASTY2(7)  | 10,297     |
|                     | VASTY2(8)  | 4,756      |
|                     | VASTY2(9)  | 2,990      |
|                     | VASTY2(10) | 3,701      |
|                     | VASTY2(11) | 2,929      |
|                     | VASTY2(12) | 6,098      |
|                     | VASTY2(13) | 7,400      |
|                     | VASTY2(14) | 3,934      |
|                     | VASTY2(15) | 2,226      |
|                     | VASTY2(16) | 1,482      |
|                     | VASTY2(17) | .          |
|                     | VASTY2(18) | ,653       |
|                     | VASTY2(19) | ,650       |
|                     | VASTY2(20) | ,814       |
|                     | VASTY2(21) | 3,633      |
|                     | VASTY2(22) | 5,757      |
|                     | VASTY2(23) | 3,431      |
|                     | VASTY2(24) | 7,513      |
|                     | VASTY2(25) | 2,014      |
|                     | VASTY2(26) | .          |
|                     | VASTY2(27) | .          |
|                     | VASTY2(28) | .          |
|                     | VASTY2(29) | .          |
|                     | VASTY2(30) | 2,285      |
|                     | VASTY2(31) | .          |
|                     | VASTY2(32) | ,766       |
|                     | VASTY2(33) | ,654       |
|                     | VASTY2(34) | 3,212      |
|                     | VASTY2(35) | .          |
|                     | Constant   |            |

Peer review only

a. Variable(s) entered on step 1: sv5, VASTY2.

```
LOGISTIC REGRESSION VARIABLES dod01
/METHOD=ENTER sv7 VASTY2
/CONTRAST (sv7)=Indicator(1)
/CONTRAST (VASTY2)=Indicator(1)
/PRINT=CI(95)
/CRITERIA=PIN(0.05) POUT(0.10) ITERATE(20) CUT(0.5).
```

## Block 1: Method = Enter

### Omnibus Tests of Model Coefficients

|        |       | Chi-square | df | Sig. |
|--------|-------|------------|----|------|
| Step 1 | Step  | 716,984    | 41 | ,000 |
|        | Block | 716,984    | 41 | ,000 |
|        | Model | 716,984    | 41 | ,000 |

### Model Summary

| Step | -2 Log likelihood    | Cox & Snell R Square | Nagelkerke R Square |
|------|----------------------|----------------------|---------------------|
| 1    | 4307,86 <sup>a</sup> | ,056                 | ,168                |

a. Estimation terminated at iteration number 20 because maximum iterations has been reached. Final solution cannot be found.

### Classification Table<sup>a</sup>

|                    |                             |                      | Predicted                   |                      |                    |
|--------------------|-----------------------------|----------------------|-----------------------------|----------------------|--------------------|
|                    |                             |                      | dod01 dödsfall ja eller nej |                      | Percentage Correct |
| Observed           |                             |                      | 0 inget dödsfall            | 1 minst ett dödsfall |                    |
| Step 1             | dod01 dödsfall ja eller nej | 0 inget dödsfall     | 11839                       | 0                    | 100,0              |
|                    |                             | 1 minst ett dödsfall | 636                         | 0                    | ,0                 |
| Overall Percentage |                             |                      |                             |                      | 94,9               |

a. The cut value is ,500



Variables in the Equation

|                     |            | B       | S.E.     | Wald    | df | Sig. | Exp(B) | 95% C.I. |
|---------------------|------------|---------|----------|---------|----|------|--------|----------|
|                     |            |         |          |         |    |      |        | Lower    |
| Step 1 <sup>a</sup> | sv7        |         |          | 13,618  | 6  | ,034 |        |          |
|                     | sv7(1)     | -,355   | ,189     | 3,510   | 1  | ,061 | ,701   | ,484     |
|                     | sv7(2)     | ,155    | ,168     | ,847    | 1  | ,357 | 1,167  | ,840     |
|                     | sv7(3)     | -,016   | ,169     | ,009    | 1  | ,922 | ,984   | ,707     |
|                     | sv7(4)     | ,131    | ,155     | ,715    | 1  | ,398 | 1,140  | ,841     |
|                     | sv7(5)     | ,222    | ,151     | 2,168   | 1  | ,141 | 1,249  | ,929     |
|                     | sv7(6)     | ,327    | ,175     | 3,490   | 1  | ,062 | 1,387  | ,984     |
|                     | VASTY2     |         |          | 208,518 | 35 | ,000 |        |          |
|                     | VASTY2(1)  | ,570    | ,344     | 2,746   | 1  | ,097 | 1,769  | ,901     |
|                     | VASTY2(2)  | ,616    | ,341     | 3,253   | 1  | ,071 | 1,851  | ,948     |
|                     | VASTY2(3)  | ,867    | ,332     | 6,833   | 1  | ,009 | 2,380  | 1,242    |
|                     | VASTY2(4)  | ,219    | ,370     | ,353    | 1  | ,553 | 1,245  | ,604     |
|                     | VASTY2(5)  | -,660   | ,496     | 1,769   | 1  | ,183 | ,517   | ,196     |
|                     | VASTY2(6)  | -18,205 | 2105,313 | ,000    | 1  | ,993 | ,000   | ,000     |
|                     | VASTY2(7)  | 1,744   | ,306     | 32,553  | 1  | ,000 | 5,717  | 3,141    |
|                     | VASTY2(8)  | ,893    | ,333     | 7,212   | 1  | ,007 | 2,444  | 1,273    |
|                     | VASTY2(9)  | ,388    | ,361     | 1,158   | 1  | ,282 | 1,475  | ,727     |
|                     | VASTY2(10) | ,622    | ,342     | 3,304   | 1  | ,069 | 1,862  | ,953     |
|                     | VASTY2(11) | ,398    | ,357     | 1,243   | 1  | ,265 | 1,489  | ,739     |
|                     | VASTY2(12) | 1,175   | ,318     | 13,619  | 1  | ,000 | 3,239  | 1,735    |
|                     | VASTY2(13) | 1,360   | ,319     | 18,196  | 1  | ,000 | 3,897  | 2,086    |
|                     | VASTY2(14) | ,706    | ,336     | 4,415   | 1  | ,036 | 2,027  | 1,049    |
|                     | VASTY2(15) | ,050    | ,375     | ,018    | 1  | ,893 | 1,052  | ,504     |
|                     | VASTY2(16) | -,873   | ,645     | 1,833   | 1  | ,176 | ,418   | ,118     |
|                     | VASTY2(17) | -17,928 | 2097,570 | ,000    | 1  | ,993 | ,000   | ,000     |
|                     | VASTY2(18) | -2,286  | 1,047    | 4,773   | 1  | ,029 | ,102   | ,013     |
|                     | VASTY2(19) | -2,263  | 1,048    | 4,660   | 1  | ,031 | ,104   | ,013     |
|                     | VASTY2(20) | -1,475  | ,644     | 5,243   | 1  | ,022 | ,229   | ,065     |
|                     | VASTY2(21) | ,616    | ,346     | 3,181   | 1  | ,074 | 1,852  | ,941     |
|                     | VASTY2(22) | 1,118   | ,320     | 12,203  | 1  | ,000 | 3,060  | 1,634    |
|                     | VASTY2(23) | ,564    | ,348     | 2,631   | 1  | ,105 | 1,758  | ,889     |
|                     | VASTY2(24) | 1,397   | ,311     | 20,135  | 1  | ,000 | 4,044  | 2,197    |
|                     | VASTY2(25) | -,146   | ,436     | ,113    | 1  | ,737 | ,864   | ,368     |
|                     | VASTY2(26) | -17,989 | 2350,865 | ,000    | 1  | ,994 | ,000   | ,000     |
|                     | VASTY2(27) | -18,112 | 2097,325 | ,000    | 1  | ,993 | ,000   | ,000     |
|                     | VASTY2(28) | -18,236 | 2678,872 | ,000    | 1  | ,995 | ,000   | ,000     |
|                     | VASTY2(29) | -18,246 | 2100,824 | ,000    | 1  | ,993 | ,000   | ,000     |
|                     | VASTY2(30) | ,059    | ,387     | ,023    | 1  | ,879 | 1,061  | ,497     |
|                     | VASTY2(31) | -17,707 | 2095,196 | ,000    | 1  | ,993 | ,000   | ,000     |
|                     | VASTY2(32) | -1,586  | ,772     | 4,227   | 1  | ,040 | ,205   | ,045     |
|                     | VASTY2(33) | -2,258  | 1,048    | 4,637   | 1  | ,031 | ,105   | ,013     |
|                     | VASTY2(34) | ,474    | ,351     | 1,830   | 1  | ,176 | 1,607  | ,808     |

## Variables in the Equation

|                     |            | 95% C.I... |
|---------------------|------------|------------|
|                     |            | Upper      |
| Step 1 <sup>a</sup> | sv7        |            |
|                     | sv7(1)     | 1,017      |
|                     | sv7(2)     | 1,623      |
|                     | sv7(3)     | 1,369      |
|                     | sv7(4)     | 1,544      |
|                     | sv7(5)     | 1,678      |
|                     | sv7(6)     | 1,954      |
|                     | VASTY2     |            |
|                     | VASTY2(1)  | 3,472      |
|                     | VASTY2(2)  | 3,613      |
|                     | VASTY2(3)  | 4,559      |
|                     | VASTY2(4)  | 2,569      |
|                     | VASTY2(5)  | 1,367      |
|                     | VASTY2(6)  | .          |
|                     | VASTY2(7)  | 10,407     |
|                     | VASTY2(8)  | 4,691      |
|                     | VASTY2(9)  | 2,992      |
|                     | VASTY2(10) | 3,642      |
|                     | VASTY2(11) | 3,000      |
|                     | VASTY2(12) | 6,046      |
|                     | VASTY2(13) | 7,281      |
|                     | VASTY2(14) | 3,917      |
|                     | VASTY2(15) | 2,193      |
|                     | VASTY2(16) | 1,479      |
|                     | VASTY2(17) | .          |
|                     | VASTY2(18) | ,790       |
|                     | VASTY2(19) | ,812       |
|                     | VASTY2(20) | ,809       |
|                     | VASTY2(21) | 3,646      |
|                     | VASTY2(22) | 5,732      |
|                     | VASTY2(23) | 3,478      |
|                     | VASTY2(24) | 7,444      |
|                     | VASTY2(25) | 2,031      |
|                     | VASTY2(26) | .          |
|                     | VASTY2(27) | .          |
|                     | VASTY2(28) | .          |
|                     | VASTY2(29) | .          |
|                     | VASTY2(30) | 2,264      |
|                     | VASTY2(31) | .          |
|                     | VASTY2(32) | ,929       |
|                     | VASTY2(33) | ,816       |
|                     | VASTY2(34) | 3,194      |

**Variables in the Equation**

|            | B       | S.E.     | Wald    | df | Sig. | Exp(B) | 95% C.I. |
|------------|---------|----------|---------|----|------|--------|----------|
|            |         |          |         |    |      |        | Lower    |
| VASTY2(35) | -17,967 | 2257,374 | ,000    | 1  | ,994 | ,000   | ,000     |
| Constant   | -3,279  | ,291     | 127,145 | 1  | ,000 | ,038   |          |

**Variables in the Equation**

|            | 95% C.I. |
|------------|----------|
|            | Upper    |
| VASTY2(35) | .        |
| Constant   |          |

a. Variable(s) entered on step 1: sv7, VASTY2.

For peer review only

COMMENT körs på abo\_bjo\_vasa\_v1.sav

COMMENT med kontroll för VASTY2, weekday, holiday, season

COMMENT läses i Table 2 som första kolumnen, sex modeller, andra kolumnen, sex modeller, osv

COMMENT till Table 4 läses modellerna 1,7,13,19,25

\*\*

LOGISTIC REGRESSION VARIABLES hand01

/METHOD=ENTER bv1 VASTY2 weekday holiday season

/CONTRAST (bv1)=Indicator(1)

/CONTRAST (VASTY2)=Indicator(1)

/CONTRAST (weekday)=Indicator(1)

/CONTRAST (holiday)=Indicator(1)

/CONTRAST (season)=Indicator(1)

/PRINT=CI(95)

/CRITERIA=PIN(0.05) POUT(0.10) ITERATE(20) CUT(0.5).

## Block 1: Method = Enter

### Omnibus Tests of Model Coefficients

|        |       | Chi-square | df | Sig. |
|--------|-------|------------|----|------|
| Step 1 | Step  | 612,758    | 48 | ,000 |
|        | Block | 612,758    | 48 | ,000 |
|        | Model | 612,758    | 48 | ,000 |

### Model Summary

| Step | -2 Log likelihood    | Cox & Snell R Square | Nagelkerke R Square |
|------|----------------------|----------------------|---------------------|
| 1    | 8010,82 <sup>a</sup> | ,048                 | ,096                |

a. Estimation terminated at iteration number 6 because parameter estimates changed by less than ,001.

Classification Table<sup>a</sup>

| Observed           |                              | Predicted                    |                     |                    |       |
|--------------------|------------------------------|------------------------------|---------------------|--------------------|-------|
|                    |                              | hand01 händelse nej eller ja |                     | Percentage Correct |       |
|                    |                              | 0 ingen händelse             | 1 minst en händelse |                    |       |
| Step 1             | hand01 händelse nej eller ja | 0 ingen händelse             | 11108               | 0                  | 100,0 |
|                    |                              | 1 minst en händelse          | 1367                | 0                  | ,0    |
| Overall Percentage |                              |                              |                     |                    | 89,0  |

a. The cut value is ,500

Variables in the Equation

|                     |            | B      | S.E. | Wald    | df | Sig. | Exp(B) | 95% C.I. for EXP(B) |       |
|---------------------|------------|--------|------|---------|----|------|--------|---------------------|-------|
|                     |            |        |      |         |    |      |        | Lower               | Upper |
| Step 1 <sup>a</sup> | bv1        |        |      | 25,202  | 2  | ,000 |        |                     |       |
|                     | bv1(1)     | -,238  | ,085 | 7,908   | 1  | ,005 | ,788   | ,668                | ,930  |
|                     | bv1(2)     | ,213   | ,070 | 9,314   | 1  | ,002 | 1,237  | 1,079               | 1,418 |
|                     | VASTY2     |        |      | 436,249 | 35 | ,000 |        |                     |       |
|                     | VASTY2(1)  | ,338   | ,240 | 1,977   | 1  | ,160 | 1,402  | ,875                | 2,245 |
|                     | VASTY2(2)  | 1,195  | ,217 | 30,330  | 1  | ,000 | 3,303  | 2,159               | 5,054 |
|                     | VASTY2(3)  | -,843  | ,304 | 7,692   | 1  | ,006 | ,431   | ,237                | ,781  |
|                     | VASTY2(4)  | ,164   | ,244 | ,454    | 1  | ,501 | 1,178  | ,731                | 1,900 |
|                     | VASTY2(5)  | -,386  | ,282 | 1,869   | 1  | ,172 | ,680   | ,391                | 1,182 |
|                     | VASTY2(6)  | -1,046 | ,328 | 10,166  | 1  | ,001 | ,351   | ,185                | ,668  |
|                     | VASTY2(7)  | 1,064  | ,221 | 23,198  | 1  | ,000 | 2,897  | 1,879               | 4,467 |
|                     | VASTY2(8)  | ,264   | ,241 | 1,203   | 1  | ,273 | 1,302  | ,812                | 2,086 |
|                     | VASTY2(9)  | ,188   | ,247 | ,582    | 1  | ,446 | 1,207  | ,744                | 1,958 |
|                     | VASTY2(10) | 1,022  | ,220 | 21,642  | 1  | ,000 | 2,779  | 1,807               | 4,275 |
|                     | VASTY2(11) | ,876   | ,223 | 15,386  | 1  | ,000 | 2,402  | 1,550               | 3,721 |
|                     | VASTY2(12) | ,081   | ,248 | ,105    | 1  | ,746 | 1,084  | ,666                | 1,764 |
|                     | VASTY2(13) | ,765   | ,225 | 11,565  | 1  | ,001 | 2,149  | 1,383               | 3,340 |
|                     | VASTY2(14) | -,291  | ,268 | 1,179   | 1  | ,278 | ,748   | ,442                | 1,264 |
|                     | VASTY2(15) | ,230   | ,242 | ,902    | 1  | ,342 | 1,259  | ,783                | 2,025 |
|                     | VASTY2(16) | ,258   | ,289 | ,794    | 1  | ,373 | 1,294  | ,734                | 2,280 |
|                     | VASTY2(17) | -1,183 | ,356 | 11,055  | 1  | ,001 | ,306   | ,152                | ,615  |
|                     | VASTY2(18) | -,880  | ,320 | 7,550   | 1  | ,006 | ,415   | ,221                | ,777  |
|                     | VASTY2(19) | -1,221 | ,387 | 9,977   | 1  | ,002 | ,295   | ,138                | ,629  |
|                     | VASTY2(20) | ,024   | ,262 | ,008    | 1  | ,927 | 1,024  | ,613                | 1,711 |
|                     | VASTY2(21) | -,182  | ,263 | ,481    | 1  | ,488 | ,833   | ,498                | 1,395 |
|                     | VASTY2(22) | ,150   | ,253 | ,351    | 1  | ,553 | 1,162  | ,708                | 1,907 |
|                     | VASTY2(23) | ,711   | ,228 | 9,706   | 1  | ,002 | 2,036  | 1,302               | 3,183 |
|                     | VASTY2(24) | ,529   | ,230 | 5,282   | 1  | ,022 | 1,698  | 1,081               | 2,667 |
|                     | VASTY2(25) | ,078   | ,265 | ,087    | 1  | ,768 | 1,081  | ,644                | 1,816 |

Variables in the Equation

|            | B      | S.E. | Wald    | df | Sig. | Exp(B) | 95% C.I. for EXP(B) |       |
|------------|--------|------|---------|----|------|--------|---------------------|-------|
|            |        |      |         |    |      |        | Lower               | Upper |
| VASTY2(26) | -.900  | ,337 | 7,120   | 1  | ,008 | ,407   | ,210                | ,788  |
| VASTY2(27) | -1,309 | ,356 | 13,477  | 1  | ,000 | ,270   | ,134                | ,543  |
| VASTY2(28) | -.959  | ,372 | 6,656   | 1  | ,010 | ,383   | ,185                | ,794  |
| VASTY2(29) | -.955  | ,320 | 8,898   | 1  | ,003 | ,385   | ,206                | ,721  |
| VASTY2(30) | -.011  | ,252 | ,002    | 1  | ,964 | ,989   | ,603                | 1,622 |
| VASTY2(31) | ,501   | ,234 | 4,596   | 1  | ,032 | 1,651  | 1,044               | 2,611 |
| VASTY2(32) | -.044  | ,260 | ,029    | 1  | ,864 | ,957   | ,575                | 1,592 |
| VASTY2(33) | -.030  | ,258 | ,013    | 1  | ,908 | ,971   | ,586                | 1,609 |
| VASTY2(34) | -1,577 | ,401 | 15,468  | 1  | ,000 | ,207   | ,094                | ,453  |
| VASTY2(35) | ,324   | ,245 | 1,752   | 1  | ,186 | 1,382  | ,856                | 2,232 |
| weekday    |        |      | 18,335  | 6  | ,005 |        |                     |       |
| weekday(1) | -.032  | ,107 | ,091    | 1  | ,763 | ,968   | ,784                | 1,195 |
| weekday(2) | -.064  | ,108 | ,349    | 1  | ,555 | ,938   | ,759                | 1,160 |
| weekday(3) | ,018   | ,107 | ,028    | 1  | ,867 | 1,018  | ,826                | 1,255 |
| weekday(4) | ,026   | ,107 | ,058    | 1  | ,810 | 1,026  | ,832                | 1,266 |
| weekday(5) | -.396  | ,119 | 11,109  | 1  | ,001 | ,673   | ,533                | ,850  |
| weekday(6) | ,050   | ,108 | ,212    | 1  | ,645 | 1,051  | ,850                | 1,299 |
| holiday(1) | -.468  | ,201 | 5,407   | 1  | ,020 | ,626   | ,422                | ,929  |
| season     |        |      | 13,381  | 4  | ,010 |        |                     |       |
| season(1)  | -.070  | ,092 | ,577    | 1  | ,448 | ,932   | ,778                | 1,117 |
| season(2)  | -.170  | ,088 | 3,763   | 1  | ,052 | ,843   | ,710                | 1,002 |
| season(3)  | ,162   | ,088 | 3,384   | 1  | ,066 | 1,176  | ,989                | 1,397 |
| season(4)  | -.024  | ,093 | ,065    | 1  | ,798 | ,976   | ,813                | 1,173 |
| Constant   | -2,147 | ,202 | 113,333 | 1  | ,000 | ,117   |                     |       |

a. Variable(s) entered on step 1: bv1, VASTY2, weekday, holiday, season.

```

LOGISTIC REGRESSION VARIABLES hand01
/METHOD=ENTER bv2 VASTY2 weekday holiday season
/CONTRAST (bv2)=Indicator(1)
/CONTRAST (VASTY2)=Indicator(1)
/CONTRAST (weekday)=Indicator(1)
/CONTRAST (holiday)=Indicator(1)
/CONTRAST (season)=Indicator(1)
/PRINT=CI(95)
/CRITERIA=PIN(0.05) POUT(0.10) ITERATE(20) CUT(0.5).

```

### Block 1: Method = Enter

## Omnibus Tests of Model Coefficients

|        |       | Chi-square | df | Sig. |
|--------|-------|------------|----|------|
| Step 1 | Step  | 602,362    | 48 | ,000 |
|        | Block | 602,362    | 48 | ,000 |
|        | Model | 602,362    | 48 | ,000 |

## Model Summary

| Step | -2 Log likelihood    | Cox & Snell R Square | Nagelkerke R Square |
|------|----------------------|----------------------|---------------------|
| 1    | 8021,22 <sup>a</sup> | ,047                 | ,094                |

a. Estimation terminated at iteration number 6 because parameter estimates changed by less than ,001.

Classification Table<sup>a</sup>

| Observed           |                              | Predicted                    |                     |                    |       |
|--------------------|------------------------------|------------------------------|---------------------|--------------------|-------|
|                    |                              | hand01 händelse nej eller ja |                     | Percentage Correct |       |
|                    |                              | 0 ingen händelse             | 1 minst en händelse |                    |       |
| Step 1             | hand01 händelse nej eller ja | 0 ingen händelse             | 11108               | 0                  | 100,0 |
|                    |                              | 1 minst en händelse          | 1367                | 0                  | ,0    |
| Overall Percentage |                              |                              |                     |                    | 89,0  |

a. The cut value is ,500

## Variables in the Equation

|                         | B      | S.E. | Wald    | df | Sig. | Exp(B) | 95% C.I. for EXP(B) |       |
|-------------------------|--------|------|---------|----|------|--------|---------------------|-------|
|                         |        |      |         |    |      |        | Lower               | Upper |
| Step 1 <sup>a</sup> bv2 |        |      | 14,998  | 2  | ,001 |        |                     |       |
| bv2(1)                  | -,159  | ,085 | 3,479   | 1  | ,062 | ,853   | ,722                | 1,008 |
| bv2(2)                  | ,136   | ,077 | 3,085   | 1  | ,079 | 1,145  | ,984                | 1,333 |
| VASTY2                  |        |      | 440,228 | 35 | ,000 |        |                     |       |
| VASTY2(1)               | ,331   | ,240 | 1,899   | 1  | ,168 | 1,392  | ,870                | 2,229 |
| VASTY2(2)               | 1,200  | ,217 | 30,618  | 1  | ,000 | 3,322  | 2,171               | 5,082 |
| VASTY2(3)               | -,796  | ,303 | 6,881   | 1  | ,009 | ,451   | ,249                | ,818  |
| VASTY2(4)               | ,197   | ,243 | ,656    | 1  | ,418 | 1,218  | ,756                | 1,962 |
| VASTY2(5)               | -,377  | ,282 | 1,783   | 1  | ,182 | ,686   | ,395                | 1,193 |
| VASTY2(6)               | -1,012 | ,328 | 9,524   | 1  | ,002 | ,364   | ,191                | ,691  |
| VASTY2(7)               | 1,113  | ,220 | 25,627  | 1  | ,000 | 3,044  | 1,978               | 4,684 |
| VASTY2(8)               | ,273   | ,241 | 1,287   | 1  | ,257 | 1,314  | ,820                | 2,106 |
| VASTY2(9)               | ,203   | ,247 | ,677    | 1  | ,411 | 1,225  | ,755                | 1,987 |
| VASTY2(10)              | 1,034  | ,220 | 22,142  | 1  | ,000 | 2,812  | 1,828               | 4,326 |
| VASTY2(11)              | ,887   | ,223 | 15,800  | 1  | ,000 | 2,428  | 1,568               | 3,759 |
| VASTY2(12)              | ,093   | ,248 | ,141    | 1  | ,707 | 1,098  | ,675                | 1,786 |
| VASTY2(13)              | ,794   | ,225 | 12,453  | 1  | ,000 | 2,212  | 1,423               | 3,438 |
| VASTY2(14)              | -,275  | ,268 | 1,052   | 1  | ,305 | ,760   | ,449                | 1,284 |
| VASTY2(15)              | ,234   | ,243 | ,932    | 1  | ,334 | 1,264  | ,786                | 2,033 |
| VASTY2(16)              | ,268   | ,289 | ,859    | 1  | ,354 | 1,307  | ,742                | 2,301 |
| VASTY2(17)              | -1,179 | ,356 | 10,983  | 1  | ,001 | ,308   | ,153                | ,618  |
| VASTY2(18)              | -,878  | ,320 | 7,519   | 1  | ,006 | ,416   | ,222                | ,779  |
| VASTY2(19)              | -1,280 | ,385 | 11,041  | 1  | ,001 | ,278   | ,131                | ,592  |
| VASTY2(20)              | ,052   | ,261 | ,040    | 1  | ,842 | 1,053  | ,631                | 1,758 |
| VASTY2(21)              | -,174  | ,263 | ,436    | 1  | ,509 | ,841   | ,502                | 1,408 |
| VASTY2(22)              | ,141   | ,253 | ,313    | 1  | ,576 | 1,152  | ,702                | 1,891 |
| VASTY2(23)              | ,703   | ,228 | 9,503   | 1  | ,002 | 2,019  | 1,292               | 3,157 |
| VASTY2(24)              | ,563   | ,230 | 5,983   | 1  | ,014 | 1,756  | 1,118               | 2,758 |
| VASTY2(25)              | ,079   | ,265 | ,090    | 1  | ,764 | 1,083  | ,645                | 1,819 |
| VASTY2(26)              | -,888  | ,337 | 6,946   | 1  | ,008 | ,411   | ,212                | ,796  |
| VASTY2(27)              | -1,290 | ,356 | 13,101  | 1  | ,000 | ,275   | ,137                | ,554  |
| VASTY2(28)              | -,948  | ,372 | 6,510   | 1  | ,011 | ,387   | ,187                | ,803  |
| VASTY2(29)              | -,936  | ,320 | 8,560   | 1  | ,003 | ,392   | ,209                | ,734  |
| VASTY2(30)              | ,004   | ,252 | ,000    | 1  | ,987 | 1,004  | ,612                | 1,647 |
| VASTY2(31)              | ,510   | ,233 | 4,771   | 1  | ,029 | 1,665  | 1,054               | 2,630 |
| VASTY2(32)              | -,052  | ,259 | ,040    | 1  | ,841 | ,949   | ,571                | 1,579 |
| VASTY2(33)              | -,033  | ,257 | ,016    | 1  | ,898 | ,968   | ,584                | 1,602 |
| VASTY2(34)              | -1,567 | ,401 | 15,279  | 1  | ,000 | ,209   | ,095                | ,458  |
| VASTY2(35)              | ,365   | ,244 | 2,239   | 1  | ,135 | 1,440  | ,893                | 2,322 |
| weekday                 |        |      | 18,655  | 6  | ,005 |        |                     |       |
| weekday(1)              | -,027  | ,107 | ,065    | 1  | ,799 | ,973   | ,788                | 1,201 |
| weekday(2)              | -,060  | ,108 | ,311    | 1  | ,577 | ,942   | ,762                | 1,164 |



## Variables in the Equation

|            | B      | S.E. | Wald    | df | Sig. | Exp(B) | 95% C.I. for EXP(B) |       |
|------------|--------|------|---------|----|------|--------|---------------------|-------|
|            |        |      |         |    |      |        | Lower               | Upper |
| weekday(3) | ,021   | ,107 | ,040    | 1  | ,842 | 1,022  | ,829                | 1,259 |
| weekday(4) | ,021   | ,107 | ,039    | 1  | ,844 | 1,021  | ,828                | 1,260 |
| weekday(5) | -,401  | ,119 | 11,402  | 1  | ,001 | ,670   | ,531                | ,845  |
| weekday(6) | ,047   | ,108 | ,189    | 1  | ,664 | 1,048  | ,848                | 1,296 |
| holiday(1) | -,472  | ,201 | 5,496   | 1  | ,019 | ,624   | ,420                | ,926  |
| season     |        |      | 13,991  | 4  | ,007 |        |                     |       |
| season(1)  | -,076  | ,092 | ,676    | 1  | ,411 | ,927   | ,774                | 1,111 |
| season(2)  | -,188  | ,088 | 4,572   | 1  | ,032 | ,829   | ,698                | ,984  |
| season(3)  | ,152   | ,088 | 3,004   | 1  | ,083 | 1,165  | ,980                | 1,383 |
| season(4)  | -,031  | ,093 | ,109    | 1  | ,741 | ,970   | ,808                | 1,164 |
| Constant   | -2,144 | ,206 | 108,644 | 1  | ,000 | ,117   |                     |       |

a. Variable(s) entered on step 1: bv2, VASTY2, weekday, holiday, season.

LOGISTIC REGRESSION VARIABLES hand01

```

/METHOD=ENTER bv3 VASTY2 weekday holiday season
/CONTRAST (bv3)=Indicator(1)
/CONTRAST (VASTY2)=Indicator(1)
/CONTRAST (weekday)=Indicator(1)
/CONTRAST (holiday)=Indicator(1)
/CONTRAST (season)=Indicator(1)
/PRINT=CI(95)
/CRITERIA=PIN(0.05) POUT(0.10) ITERATE(20) CUT(0.5).

```

### Block 1: Method = Enter

#### Omnibus Tests of Model Coefficients

|        |       | Chi-square | df | Sig. |
|--------|-------|------------|----|------|
| Step 1 | Step  | 605,724    | 48 | ,000 |
|        | Block | 605,724    | 48 | ,000 |
|        | Model | 605,724    | 48 | ,000 |

**Model Summary**

| Step | -2 Log likelihood    | Cox & Snell R Square | Nagelkerke R Square |
|------|----------------------|----------------------|---------------------|
| 1    | 8017,86 <sup>a</sup> | ,047                 | ,095                |

a. Estimation terminated at iteration number 6 because parameter estimates changed by less than ,001.

**Classification Table<sup>a</sup>**

| Observed           |                              | Predicted                    |                     |                    |       |
|--------------------|------------------------------|------------------------------|---------------------|--------------------|-------|
|                    |                              | hand01 händelse nej eller ja |                     | Percentage Correct |       |
|                    |                              | 0 ingen händelse             | 1 minst en händelse |                    |       |
| Step 1             | hand01 händelse nej eller ja | 0 ingen händelse             | 11108               | 0                  | 100,0 |
|                    |                              | 1 minst en händelse          | 1367                | 0                  | ,0    |
| Overall Percentage |                              |                              |                     |                    | 89,0  |

a. The cut value is ,500

**Variables in the Equation**

|                     | B     | S.E. | Wald    | df | Sig. | Exp(B) | 95% C.I. for EXP(B) |       |
|---------------------|-------|------|---------|----|------|--------|---------------------|-------|
|                     |       |      |         |    |      |        | Lower               | Upper |
| Step 1 <sup>a</sup> |       |      |         |    |      |        |                     |       |
| bv3                 |       |      | 17,452  | 2  | ,000 |        |                     |       |
| bv3(1)              | -,418 | ,119 | 12,448  | 1  | ,000 | ,658   | ,522                | ,830  |
| bv3(2)              | ,156  | ,085 | 3,381   | 1  | ,066 | 1,168  | ,990                | 1,379 |
| VASTY2              |       |      | 440,036 | 35 | ,000 |        |                     |       |
| VASTY2(1)           | ,378  | ,240 | 2,474   | 1  | ,116 | 1,459  | ,911                | 2,337 |
| VASTY2(2)           | 1,224 | ,217 | 31,883  | 1  | ,000 | 3,400  | 2,223               | 5,199 |
| VASTY2(3)           | -,769 | ,304 | 6,424   | 1  | ,011 | ,463   | ,256                | ,840  |
| VASTY2(4)           | ,221  | ,244 | ,822    | 1  | ,365 | 1,247  | ,774                | 2,010 |
| VASTY2(5)           | -,351 | ,282 | 1,551   | 1  | ,213 | ,704   | ,405                | 1,223 |
| VASTY2(6)           | -,992 | ,328 | 9,142   | 1  | ,002 | ,371   | ,195                | ,705  |
| VASTY2(7)           | 1,128 | ,222 | 25,748  | 1  | ,000 | 3,091  | 1,999               | 4,780 |
| VASTY2(8)           | ,309  | ,240 | 1,658   | 1  | ,198 | 1,362  | ,851                | 2,181 |
| VASTY2(9)           | ,244  | ,246 | ,979    | 1  | ,322 | 1,276  | ,787                | 2,067 |
| VASTY2(10)          | 1,059 | ,219 | 23,324  | 1  | ,000 | 2,883  | 1,876               | 4,432 |
| VASTY2(11)          | ,908  | ,223 | 16,553  | 1  | ,000 | 2,479  | 1,601               | 3,840 |
| VASTY2(12)          | ,127  | ,248 | ,263    | 1  | ,608 | 1,136  | ,699                | 1,846 |
| VASTY2(13)          | ,852  | ,224 | 14,510  | 1  | ,000 | 2,344  | 1,512               | 3,633 |
| VASTY2(14)          | -,239 | ,267 | ,798    | 1  | ,372 | ,787   | ,466                | 1,330 |
| VASTY2(15)          | ,267  | ,242 | 1,219   | 1  | ,270 | 1,306  | ,813                | 2,100 |

## Variables in the Equation

|            | B      | S.E. | Wald    | df | Sig. | Exp(B) | 95% C.I. for EXP(B) |       |
|------------|--------|------|---------|----|------|--------|---------------------|-------|
|            |        |      |         |    |      |        | Lower               | Upper |
| VASTY2(16) | ,283   | ,290 | ,954    | 1  | ,329 | 1,327  | ,752                | 2,341 |
| VASTY2(17) | -1,187 | ,356 | 11,133  | 1  | ,001 | ,305   | ,152                | ,613  |
| VASTY2(18) | -,862  | ,320 | 7,242   | 1  | ,007 | ,422   | ,226                | ,791  |
| VASTY2(19) | -1,163 | ,388 | 8,980   | 1  | ,003 | ,312   | ,146                | ,669  |
| VASTY2(20) | ,077   | ,262 | ,088    | 1  | ,767 | 1,081  | ,647                | 1,805 |
| VASTY2(21) | -,153  | ,263 | ,339    | 1  | ,561 | ,858   | ,513                | 1,436 |
| VASTY2(22) | ,104   | ,252 | ,170    | 1  | ,680 | 1,110  | ,677                | 1,820 |
| VASTY2(23) | ,717   | ,228 | 9,883   | 1  | ,002 | 2,048  | 1,310               | 3,203 |
| VASTY2(24) | ,581   | ,230 | 6,379   | 1  | ,012 | 1,788  | 1,139               | 2,808 |
| VASTY2(25) | ,098   | ,265 | ,136    | 1  | ,712 | 1,103  | ,656                | 1,853 |
| VASTY2(26) | -,848  | ,337 | 6,333   | 1  | ,012 | ,428   | ,221                | ,829  |
| VASTY2(27) | -1,244 | ,356 | 12,212  | 1  | ,000 | ,288   | ,143                | ,579  |
| VASTY2(28) | -,898  | ,371 | 5,852   | 1  | ,016 | ,407   | ,197                | ,843  |
| VASTY2(29) | -,934  | ,320 | 8,521   | 1  | ,004 | ,393   | ,210                | ,736  |
| VASTY2(30) | ,002   | ,252 | ,000    | 1  | ,993 | 1,002  | ,611                | 1,643 |
| VASTY2(31) | ,562   | ,235 | 5,728   | 1  | ,017 | 1,753  | 1,107               | 2,777 |
| VASTY2(32) | ,011   | ,261 | ,002    | 1  | ,966 | 1,011  | ,606                | 1,687 |
| VASTY2(33) | ,025   | ,258 | ,010    | 1  | ,922 | 1,026  | ,618                | 1,702 |
| VASTY2(34) | -1,559 | ,401 | 15,134  | 1  | ,000 | ,210   | ,096                | ,461  |
| VASTY2(35) | ,384   | ,245 | 2,466   | 1  | ,116 | 1,469  | ,909                | 2,374 |
| weekday    |        |      | 19,567  | 6  | ,003 |        |                     |       |
| weekday(1) | -,034  | ,107 | ,103    | 1  | ,748 | ,966   | ,783                | 1,192 |
| weekday(2) | -,070  | ,108 | ,420    | 1  | ,517 | ,932   | ,754                | 1,152 |
| weekday(3) | ,014   | ,107 | ,016    | 1  | ,899 | 1,014  | ,822                | 1,249 |
| weekday(4) | ,017   | ,107 | ,024    | 1  | ,877 | 1,017  | ,824                | 1,254 |
| weekday(5) | -,413  | ,119 | 12,114  | 1  | ,001 | ,662   | ,525                | ,835  |
| weekday(6) | ,050   | ,108 | ,210    | 1  | ,647 | 1,051  | ,850                | 1,299 |
| holiday(1) | -,475  | ,201 | 5,581   | 1  | ,018 | ,622   | ,419                | ,922  |
| season     |        |      | 14,254  | 4  | ,007 |        |                     |       |
| season(1)  | -,075  | ,092 | ,658    | 1  | ,417 | ,928   | ,774                | 1,112 |
| season(2)  | -,191  | ,088 | 4,747   | 1  | ,029 | ,826   | ,696                | ,981  |
| season(3)  | ,153   | ,088 | 3,014   | 1  | ,083 | 1,165  | ,981                | 1,384 |
| season(4)  | -,029  | ,093 | ,098    | 1  | ,754 | ,971   | ,809                | 1,166 |
| Constant   | -2,139 | ,200 | 114,213 | 1  | ,000 | ,118   |                     |       |

a. Variable(s) entered on step 1: bv3, VASTY2, weekday, holiday, season.

LOGISTIC REGRESSION VARIABLES hand01

/METHOD=ENTER sv3 VASTY2 weekday holiday season

```

1
2
3 /CONTRAST (sv3)=Indicator(1)
4 /CONTRAST (VASTY2)=Indicator(1)
5 /CONTRAST (weekday)=Indicator(1)
6 /CONTRAST (holiday)=Indicator(1)
7 /CONTRAST (season)=Indicator(1)
8 /PRINT=CI(95)
9 /CRITERIA=PIN(0.05) POUT(0.10) ITERATE(20) CUT(0.5).
11
12

```

## Block 1: Method = Enter

### Omnibus Tests of Model Coefficients

|        |       | Chi-square | df | Sig. |
|--------|-------|------------|----|------|
| Step 1 | Step  | 593,799    | 48 | ,000 |
|        | Block | 593,799    | 48 | ,000 |
|        | Model | 593,799    | 48 | ,000 |

### Model Summary

| Step | -2 Log likelihood    | Cox & Snell R Square | Nagelkerke R Square |
|------|----------------------|----------------------|---------------------|
| 1    | 8029,78 <sup>a</sup> | ,046                 | ,093                |

a. Estimation terminated at iteration number 6 because parameter estimates changed by less than ,001.

### Classification Table<sup>a</sup>

|                    |                              |                     | Predicted                    |   |                    |
|--------------------|------------------------------|---------------------|------------------------------|---|--------------------|
|                    |                              |                     | hand01 händelse nej eller ja |   | Percentage Correct |
| Observed           |                              | 0 ingen händelse    | 1 minst en händelse          |   |                    |
| Step 1             | hand01 händelse nej eller ja | 0 ingen händelse    | 11108                        | 0 | 100,0              |
|                    |                              | 1 minst en händelse | 1367                         | 0 | ,0                 |
| Overall Percentage |                              |                     |                              |   | 89,0               |

a. The cut value is ,500

## Variables in the Equation

|                     | B      | S.E. | Wald    | df | Sig. | Exp(B) | 95% C.I. for EXP(B) |       |
|---------------------|--------|------|---------|----|------|--------|---------------------|-------|
|                     |        |      |         |    |      |        | Lower               | Upper |
| Step 1 <sup>a</sup> |        |      |         |    |      |        |                     |       |
| sv3                 |        |      | 6,576   | 2  | ,037 |        |                     |       |
| sv3(1)              | -,121  | ,086 | 1,964   | 1  | ,161 | ,886   | ,749                | 1,049 |
| sv3(2)              | ,121   | ,084 | 2,074   | 1  | ,150 | 1,128  | ,957                | 1,329 |
| VASTY2              |        |      | 437,718 | 35 | ,000 |        |                     |       |
| VASTY2(1)           | ,315   | ,241 | 1,713   | 1  | ,191 | 1,371  | ,855                | 2,198 |
| VASTY2(2)           | 1,154  | ,220 | 27,492  | 1  | ,000 | 3,169  | 2,059               | 4,878 |
| VASTY2(3)           | -,655  | ,302 | 4,706   | 1  | ,030 | ,519   | ,287                | ,939  |
| VASTY2(4)           | ,310   | ,242 | 1,641   | 1  | ,200 | 1,364  | ,848                | 2,193 |
| VASTY2(5)           | -,264  | ,283 | ,869    | 1  | ,351 | ,768   | ,441                | 1,338 |
| VASTY2(6)           | -1,049 | ,331 | 10,057  | 1  | ,002 | ,350   | ,183                | ,670  |
| VASTY2(7)           | 1,260  | ,217 | 33,606  | 1  | ,000 | 3,524  | 2,302               | 5,394 |
| VASTY2(8)           | ,389   | ,241 | 2,613   | 1  | ,106 | 1,476  | ,921                | 2,365 |
| VASTY2(9)           | ,275   | ,246 | 1,251   | 1  | ,263 | 1,317  | ,813                | 2,132 |
| VASTY2(10)          | ,990   | ,224 | 19,591  | 1  | ,000 | 2,692  | 1,736               | 4,174 |
| VASTY2(11)          | ,917   | ,223 | 16,909  | 1  | ,000 | 2,501  | 1,616               | 3,872 |
| VASTY2(12)          | ,070   | ,251 | ,077    | 1  | ,781 | 1,072  | ,656                | 1,752 |
| VASTY2(13)          | ,804   | ,228 | 12,431  | 1  | ,000 | 2,235  | 1,429               | 3,495 |
| VASTY2(14)          | -,272  | ,269 | 1,022   | 1  | ,312 | ,762   | ,450                | 1,290 |
| VASTY2(15)          | ,202   | ,245 | ,676    | 1  | ,411 | 1,223  | ,756                | 1,979 |
| VASTY2(16)          | ,271   | ,289 | ,882    | 1  | ,348 | 1,312  | ,745                | 2,311 |
| VASTY2(17)          | -1,163 | ,356 | 10,679  | 1  | ,001 | ,312   | ,155                | ,628  |
| VASTY2(18)          | -,747  | ,325 | 5,276   | 1  | ,022 | ,474   | ,251                | ,896  |
| VASTY2(19)          | -1,284 | ,387 | 10,981  | 1  | ,001 | ,277   | ,130                | ,592  |
| VASTY2(20)          | ,057   | ,262 | ,048    | 1  | ,827 | 1,059  | ,634                | 1,769 |
| VASTY2(21)          | -,104  | ,263 | ,156    | 1  | ,692 | ,901   | ,538                | 1,509 |
| VASTY2(22)          | ,062   | ,252 | ,061    | 1  | ,805 | 1,064  | ,649                | 1,744 |
| VASTY2(23)          | ,713   | ,228 | 9,763   | 1  | ,002 | 2,039  | 1,304               | 3,189 |
| VASTY2(24)          | ,614   | ,229 | 7,163   | 1  | ,007 | 1,848  | 1,179               | 2,897 |
| VASTY2(25)          | ,115   | ,265 | ,187    | 1  | ,665 | 1,122  | ,667                | 1,887 |
| VASTY2(26)          | -,845  | ,337 | 6,302   | 1  | ,012 | ,429   | ,222                | ,831  |
| VASTY2(27)          | -1,286 | ,357 | 12,973  | 1  | ,000 | ,276   | ,137                | ,556  |
| VASTY2(28)          | -,974  | ,375 | 6,762   | 1  | ,009 | ,378   | ,181                | ,787  |
| VASTY2(29)          | -1,019 | ,325 | 9,861   | 1  | ,002 | ,361   | ,191                | ,682  |
| VASTY2(30)          | ,090   | ,253 | ,125    | 1  | ,723 | 1,094  | ,666                | 1,796 |
| VASTY2(31)          | ,632   | ,238 | 7,037   | 1  | ,008 | 1,882  | 1,180               | 3,003 |
| VASTY2(32)          | ,045   | ,266 | ,028    | 1  | ,867 | 1,046  | ,621                | 1,760 |
| VASTY2(33)          | ,075   | ,264 | ,080    | 1  | ,777 | 1,078  | ,643                | 1,808 |
| VASTY2(34)          | -1,540 | ,401 | 14,764  | 1  | ,000 | ,214   | ,098                | ,470  |
| VASTY2(35)          | ,432   | ,243 | 3,170   | 1  | ,075 | 1,541  | ,957                | 2,481 |
| weekday             |        |      | 19,432  | 6  | ,003 |        |                     |       |
| weekday(1)          | -,029  | ,107 | ,073    | 1  | ,787 | ,971   | ,787                | 1,199 |
| weekday(2)          | -,059  | ,108 | ,293    | 1  | ,588 | ,943   | ,763                | 1,166 |

## Variables in the Equation

|            | B      | S.E. | Wald    | df | Sig. | Exp(B) | 95% C.I. for EXP(B) |       |
|------------|--------|------|---------|----|------|--------|---------------------|-------|
|            |        |      |         |    |      |        | Lower               | Upper |
| weekday(3) | ,025   | ,107 | ,056    | 1  | ,814 | 1,025  | ,832                | 1,264 |
| weekday(4) | ,028   | ,107 | ,070    | 1  | ,791 | 1,029  | ,834                | 1,270 |
| weekday(5) | -,411  | ,119 | 11,974  | 1  | ,001 | ,663   | ,525                | ,837  |
| weekday(6) | ,034   | ,108 | ,100    | 1  | ,752 | 1,035  | ,837                | 1,279 |
| holiday(1) | -,478  | ,201 | 5,647   | 1  | ,017 | ,620   | ,418                | ,920  |
| season     |        |      | 15,282  | 4  | ,004 |        |                     |       |
| season(1)  | -,084  | ,092 | ,827    | 1  | ,363 | ,920   | ,768                | 1,102 |
| season(2)  | -,207  | ,088 | 5,579   | 1  | ,018 | ,813   | ,685                | ,965  |
| season(3)  | ,147   | ,088 | 2,796   | 1  | ,095 | 1,158  | ,975                | 1,376 |
| season(4)  | -,040  | ,093 | ,184    | 1  | ,668 | ,961   | ,800                | 1,153 |
| Constant   | -2,163 | ,204 | 112,859 | 1  | ,000 | ,115   |                     |       |

a. Variable(s) entered on step 1: sv3, VASTY2, weekday, holiday, season.

LOGISTIC REGRESSION VARIABLES hand01

/METHOD=ENTER sv5 VASTY2 weekday holiday season

/CONTRAST (sv5)=Indicator(1)

/CONTRAST (VASTY2)=Indicator(1)

/CONTRAST (weekday)=Indicator(1)

/CONTRAST (holiday)=Indicator(1)

/CONTRAST (season)=Indicator(1)

/PRINT=CI(95)

/CRITERIA=PIN(0.05) POUT(0.10) ITERATE(20) CUT(0.5).

### Block 1: Method = Enter

#### Omnibus Tests of Model Coefficients

|        |       | Chi-square | df | Sig. |
|--------|-------|------------|----|------|
| Step 1 | Step  | 600,509    | 50 | ,000 |
|        | Block | 600,509    | 50 | ,000 |
|        | Model | 600,509    | 50 | ,000 |

**Model Summary**

| Step | -2 Log likelihood    | Cox & Snell R Square | Nagelkerke R Square |
|------|----------------------|----------------------|---------------------|
| 1    | 8023,07 <sup>a</sup> | ,047                 | ,094                |

a. Estimation terminated at iteration number 6 because parameter estimates changed by less than ,001.

**Classification Table<sup>a</sup>**

| Observed           |                              | Predicted                    |                     |                    |       |
|--------------------|------------------------------|------------------------------|---------------------|--------------------|-------|
|                    |                              | hand01 händelse nej eller ja |                     | Percentage Correct |       |
|                    |                              | 0 ingen händelse             | 1 minst en händelse |                    |       |
| Step 1             | hand01 händelse nej eller ja | 0 ingen händelse             | 11108               | 0                  | 100,0 |
|                    |                              | 1 minst en händelse          | 1367                | 0                  | ,0    |
| Overall Percentage |                              |                              |                     |                    | 89,0  |

a. The cut value is ,500

**Variables in the Equation**

|                     | B      | S.E. | Wald    | df | Sig. | Exp(B) | 95% C.I. for EXP(B) |       |
|---------------------|--------|------|---------|----|------|--------|---------------------|-------|
|                     |        |      |         |    |      |        | Lower               | Upper |
| Step 1 <sup>a</sup> |        |      |         |    |      |        |                     |       |
| sv5                 |        |      | 13,344  | 4  | ,010 |        |                     |       |
| sv5(1)              | -,171  | ,109 | 2,454   | 1  | ,117 | ,842   | ,680                | 1,044 |
| sv5(2)              | -,043  | ,108 | ,160    | 1  | ,689 | ,958   | ,775                | 1,184 |
| sv5(3)              | -,069  | ,100 | ,474    | 1  | ,491 | ,933   | ,767                | 1,136 |
| sv5(4)              | ,224   | ,109 | 4,251   | 1  | ,039 | 1,251  | 1,011               | 1,548 |
| VASTY2              |        |      | 438,244 | 35 | ,000 |        |                     |       |
| VASTY2(1)           | ,299   | ,241 | 1,537   | 1  | ,215 | 1,348  | ,841                | 2,163 |
| VASTY2(2)           | 1,090  | ,222 | 24,070  | 1  | ,000 | 2,974  | 1,924               | 4,597 |
| VASTY2(3)           | -,670  | ,302 | 4,916   | 1  | ,027 | ,512   | ,283                | ,925  |
| VASTY2(4)           | ,306   | ,242 | 1,600   | 1  | ,206 | 1,359  | ,845                | 2,184 |
| VASTY2(5)           | -,288  | ,283 | 1,029   | 1  | ,310 | ,750   | ,430                | 1,307 |
| VASTY2(6)           | -1,161 | ,334 | 12,051  | 1  | ,001 | ,313   | ,163                | ,603  |
| VASTY2(7)           | 1,259  | ,217 | 33,591  | 1  | ,000 | 3,520  | 2,300               | 5,388 |
| VASTY2(8)           | ,363   | ,241 | 2,270   | 1  | ,132 | 1,438  | ,897                | 2,306 |
| VASTY2(9)           | ,283   | ,246 | 1,320   | 1  | ,251 | 1,326  | ,819                | 2,148 |
| VASTY2(10)          | ,912   | ,227 | 16,180  | 1  | ,000 | 2,489  | 1,596               | 3,882 |
| VASTY2(11)          | ,908   | ,223 | 16,576  | 1  | ,000 | 2,479  | 1,601               | 3,838 |
| VASTY2(12)          | ,034   | ,251 | ,018    | 1  | ,892 | 1,035  | ,632                | 1,694 |
| VASTY2(13)          | ,723   | ,231 | 9,766   | 1  | ,002 | 2,061  | 1,309               | 3,243 |

## Variables in the Equation

|            | B      | S.E. | Wald    | df | Sig. | Exp(B) | 95% C.I. for EXP(B) |       |
|------------|--------|------|---------|----|------|--------|---------------------|-------|
|            |        |      |         |    |      |        | Lower               | Upper |
| VASTY2(14) | -,312  | ,269 | 1,342   | 1  | ,247 | ,732   | ,432                | 1,241 |
| VASTY2(15) | ,145   | ,247 | ,345    | 1  | ,557 | 1,156  | ,713                | 1,876 |
| VASTY2(16) | ,228   | ,290 | ,620    | 1  | ,431 | 1,257  | ,712                | 2,219 |
| VASTY2(17) | -1,183 | ,356 | 11,032  | 1  | ,001 | ,306   | ,152                | ,616  |
| VASTY2(18) | -,740  | ,329 | 5,064   | 1  | ,024 | ,477   | ,251                | ,909  |
| VASTY2(19) | -1,274 | ,391 | 10,613  | 1  | ,001 | ,280   | ,130                | ,602  |
| VASTY2(20) | -,005  | ,264 | ,000    | 1  | ,986 | ,995   | ,594                | 1,669 |
| VASTY2(21) | -,112  | ,263 | ,182    | 1  | ,670 | ,894   | ,534                | 1,497 |
| VASTY2(22) | ,053   | ,252 | ,044    | 1  | ,834 | 1,054  | ,643                | 1,728 |
| VASTY2(23) | ,703   | ,228 | 9,499   | 1  | ,002 | 2,020  | 1,292               | 3,159 |
| VASTY2(24) | ,584   | ,230 | 6,458   | 1  | ,011 | 1,794  | 1,143               | 2,815 |
| VASTY2(25) | ,091   | ,266 | ,118    | 1  | ,731 | 1,096  | ,651                | 1,844 |
| VASTY2(26) | -,851  | ,337 | 6,380   | 1  | ,012 | ,427   | ,221                | ,826  |
| VASTY2(27) | -1,338 | ,358 | 13,947  | 1  | ,000 | ,262   | ,130                | ,530  |
| VASTY2(28) | -1,106 | ,379 | 8,528   | 1  | ,003 | ,331   | ,158                | ,695  |
| VASTY2(29) | -1,159 | ,330 | 12,360  | 1  | ,000 | ,314   | ,164                | ,599  |
| VASTY2(30) | ,074   | ,253 | ,086    | 1  | ,770 | 1,077  | ,656                | 1,769 |
| VASTY2(31) | ,627   | ,241 | 6,767   | 1  | ,009 | 1,871  | 1,167               | 3,001 |
| VASTY2(32) | ,051   | ,270 | ,035    | 1  | ,851 | 1,052  | ,620                | 1,786 |
| VASTY2(33) | ,085   | ,269 | ,100    | 1  | ,752 | 1,089  | ,643                | 1,844 |
| VASTY2(34) | -1,549 | ,401 | 14,941  | 1  | ,000 | ,212   | ,097                | ,466  |
| VASTY2(35) | ,435   | ,243 | 3,201   | 1  | ,074 | 1,545  | ,959                | 2,489 |
| weekday    |        |      | 18,792  | 6  | ,005 |        |                     |       |
| weekday(1) | -,023  | ,107 | ,046    | 1  | ,830 | ,977   | ,792                | 1,206 |
| weekday(2) | -,055  | ,108 | ,260    | 1  | ,610 | ,946   | ,766                | 1,170 |
| weekday(3) | ,024   | ,107 | ,051    | 1  | ,821 | 1,024  | ,831                | 1,263 |
| weekday(4) | ,034   | ,107 | ,100    | 1  | ,752 | 1,035  | ,838                | 1,277 |
| weekday(5) | -,402  | ,119 | 11,427  | 1  | ,001 | ,669   | ,530                | ,844  |
| weekday(6) | ,036   | ,108 | ,111    | 1  | ,739 | 1,037  | ,839                | 1,281 |
| holiday(1) | -,481  | ,202 | 5,685   | 1  | ,017 | ,618   | ,417                | ,918  |
| season     |        |      | 14,175  | 4  | ,007 |        |                     |       |
| season(1)  | -,078  | ,092 | ,711    | 1  | ,399 | ,925   | ,772                | 1,108 |
| season(2)  | -,196  | ,088 | 4,969   | 1  | ,026 | ,822   | ,692                | ,977  |
| season(3)  | ,146   | ,088 | 2,772   | 1  | ,096 | 1,158  | ,974                | 1,375 |
| season(4)  | -,031  | ,093 | ,113    | 1  | ,737 | ,969   | ,807                | 1,164 |
| Constant   | -2,130 | ,209 | 103,891 | 1  | ,000 | ,119   |                     |       |

a. Variable(s) entered on step 1: sv5, VASTY2, weekday, holiday, season.



```

LOGISTIC REGRESSION VARIABLES hand01
/METHOD=ENTER sv7 VASTY2 weekday holiday season
/CONTRAST (sv7)=Indicator(1)
/CONTRAST (VASTY2)=Indicator(1)
/CONTRAST (weekday)=Indicator(1)
/CONTRAST (holiday)=Indicator(1)
/CONTRAST (season)=Indicator(1)
/PRINT=CI(95)
/CRITERIA=PIN(0.05) POUT(0.10) ITERATE(20) CUT(0.5).

```

## Block 1: Method = Enter

### Omnibus Tests of Model Coefficients

|        |       | Chi-square | df | Sig. |
|--------|-------|------------|----|------|
| Step 1 | Step  | 604,438    | 52 | ,000 |
|        | Block | 604,438    | 52 | ,000 |
|        | Model | 604,438    | 52 | ,000 |

### Model Summary

| Step | -2 Log likelihood    | Cox & Snell R Square | Nagelkerke R Square |
|------|----------------------|----------------------|---------------------|
| 1    | 8019,14 <sup>a</sup> | ,047                 | ,095                |

a. Estimation terminated at iteration number 6 because parameter estimates changed by less than ,001.

### Classification Table<sup>a</sup>

| Observed           |                              | Predicted                    |                     |                    |
|--------------------|------------------------------|------------------------------|---------------------|--------------------|
|                    |                              | hand01 händelse nej eller ja |                     | Percentage Correct |
|                    |                              | 0 ingen händelse             | 1 minst en händelse |                    |
| Step 1             | hand01 händelse nej eller ja | 0 ingen händelse             | 1 minst en händelse |                    |
|                    |                              | 11108                        | 0                   | 100,0              |
|                    |                              | 1367                         | 0                   | ,0                 |
| Overall Percentage |                              |                              |                     | 89,0               |

a. The cut value is ,500

## Variables in the Equation

|                         | B      | S.E. | Wald    | df | Sig. | Exp(B) | 95% C.I. for EXP(B) |       |
|-------------------------|--------|------|---------|----|------|--------|---------------------|-------|
|                         |        |      |         |    |      |        | Lower               | Upper |
| Step 1 <sup>a</sup> sv7 |        |      | 17,254  | 6  | ,008 |        |                     |       |
| sv7(1)                  | -,258  | ,126 | 4,229   | 1  | ,040 | ,772   | ,604                | ,988  |
| sv7(2)                  | -,052  | ,127 | ,169    | 1  | ,681 | ,949   | ,740                | 1,218 |
| sv7(3)                  | -,109  | ,126 | ,754    | 1  | ,385 | ,897   | ,701                | 1,147 |
| sv7(4)                  | -,064  | ,119 | ,293    | 1  | ,588 | ,938   | ,743                | 1,184 |
| sv7(5)                  | ,022   | ,113 | ,037    | 1  | ,847 | 1,022  | ,819                | 1,275 |
| sv7(6)                  | ,294   | ,127 | 5,396   | 1  | ,020 | 1,342  | 1,047               | 1,720 |
| VASTY2                  |        |      | 437,602 | 35 | ,000 |        |                     |       |
| VASTY2(1)               | ,303   | ,241 | 1,579   | 1  | ,209 | 1,354  | ,844                | 2,173 |
| VASTY2(2)               | 1,071  | ,223 | 23,151  | 1  | ,000 | 2,918  | 1,886               | 4,513 |
| VASTY2(3)               | -,676  | ,302 | 4,999   | 1  | ,025 | ,509   | ,281                | ,920  |
| VASTY2(4)               | ,296   | ,242 | 1,491   | 1  | ,222 | 1,345  | ,836                | 2,163 |
| VASTY2(5)               | -,271  | ,284 | ,916    | 1  | ,338 | ,762   | ,437                | 1,329 |
| VASTY2(6)               | -1,227 | ,337 | 13,247  | 1  | ,000 | ,293   | ,152                | ,568  |
| VASTY2(7)               | 1,255  | ,217 | 33,369  | 1  | ,000 | 3,507  | 2,291               | 5,368 |
| VASTY2(8)               | ,366   | ,241 | 2,307   | 1  | ,129 | 1,442  | ,899                | 2,314 |
| VASTY2(9)               | ,274   | ,246 | 1,241   | 1  | ,265 | 1,315  | ,812                | 2,130 |
| VASTY2(10)              | ,888   | ,227 | 15,274  | 1  | ,000 | 2,431  | 1,557               | 3,795 |
| VASTY2(11)              | ,915   | ,223 | 16,802  | 1  | ,000 | 2,497  | 1,612               | 3,868 |
| VASTY2(12)              | ,026   | ,251 | ,011    | 1  | ,917 | 1,026  | ,627                | 1,680 |
| VASTY2(13)              | ,692   | ,232 | 8,896   | 1  | ,003 | 1,999  | 1,268               | 3,150 |
| VASTY2(14)              | -,322  | ,270 | 1,427   | 1  | ,232 | ,725   | ,427                | 1,229 |
| VASTY2(15)              | ,121   | ,248 | ,239    | 1  | ,625 | 1,129  | ,695                | 1,834 |
| VASTY2(16)              | ,205   | ,291 | ,496    | 1  | ,481 | 1,227  | ,694                | 2,170 |
| VASTY2(17)              | -1,185 | ,356 | 11,067  | 1  | ,001 | ,306   | ,152                | ,614  |
| VASTY2(18)              | -,680  | ,331 | 4,213   | 1  | ,040 | ,507   | ,265                | ,970  |
| VASTY2(19)              | -1,205 | ,394 | 9,363   | 1  | ,002 | ,300   | ,138                | ,648  |
| VASTY2(20)              | -,029  | ,264 | ,012    | 1  | ,911 | ,971   | ,578                | 1,630 |
| VASTY2(21)              | -,115  | ,263 | ,190    | 1  | ,663 | ,892   | ,532                | 1,493 |
| VASTY2(22)              | ,057   | ,252 | ,051    | 1  | ,821 | 1,059  | ,646                | 1,735 |
| VASTY2(23)              | ,709   | ,228 | 9,646   | 1  | ,002 | 2,031  | 1,299               | 3,177 |
| VASTY2(24)              | ,580   | ,230 | 6,365   | 1  | ,012 | 1,786  | 1,138               | 2,804 |
| VASTY2(25)              | ,102   | ,266 | ,146    | 1  | ,702 | 1,107  | ,658                | 1,863 |
| VASTY2(26)              | -,853  | ,337 | 6,406   | 1  | ,011 | ,426   | ,220                | ,825  |
| VASTY2(27)              | -1,369 | ,359 | 14,543  | 1  | ,000 | ,254   | ,126                | ,514  |
| VASTY2(28)              | -1,183 | ,382 | 9,587   | 1  | ,002 | ,306   | ,145                | ,648  |
| VASTY2(29)              | -1,242 | ,334 | 13,838  | 1  | ,000 | ,289   | ,150                | ,556  |
| VASTY2(30)              | ,077   | ,253 | ,094    | 1  | ,760 | 1,081  | ,658                | 1,775 |
| VASTY2(31)              | ,664   | ,242 | 7,543   | 1  | ,006 | 1,942  | 1,209               | 3,118 |
| VASTY2(32)              | ,111   | ,273 | ,167    | 1  | ,683 | 1,118  | ,655                | 1,908 |
| VASTY2(33)              | ,154   | ,273 | ,316    | 1  | ,574 | 1,166  | ,683                | 1,992 |
| VASTY2(34)              | -1,551 | ,401 | 14,976  | 1  | ,000 | ,212   | ,097                | ,465  |

## Variables in the Equation

|            | B      | S.E. | Wald   | df | Sig. | Exp(B) | 95% C.I. for EXP(B) |       |
|------------|--------|------|--------|----|------|--------|---------------------|-------|
|            |        |      |        |    |      |        | Lower               | Upper |
| VASTY2(35) | ,431   | ,243 | 3,128  | 1  | ,077 | 1,538  | ,954                | 2,479 |
| weekday    |        |      | 18,676 | 6  | ,005 |        |                     |       |
| weekday(1) | -,024  | ,107 | ,052   | 1  | ,820 | ,976   | ,791                | 1,205 |
| weekday(2) | -,053  | ,108 | ,237   | 1  | ,627 | ,949   | ,767                | 1,173 |
| weekday(3) | ,027   | ,107 | ,064   | 1  | ,800 | 1,027  | ,833                | 1,267 |
| weekday(4) | ,035   | ,107 | ,107   | 1  | ,744 | 1,036  | ,839                | 1,279 |
| weekday(5) | -,399  | ,119 | 11,250 | 1  | ,001 | ,671   | ,531                | ,847  |
| weekday(6) | ,039   | ,108 | ,132   | 1  | ,717 | 1,040  | ,841                | 1,286 |
| holiday    |        |      | 5,537  | 1  | ,019 | ,622   | ,419                | ,924  |
| holiday(1) | -,474  | ,202 | 5,537  | 1  | ,019 | ,622   | ,419                | ,924  |
| season     |        |      | 13,156 | 4  | ,011 |        |                     |       |
| season(1)  | -,076  | ,092 | ,678   | 1  | ,410 | ,927   | ,774                | 1,111 |
| season(2)  | -,186  | ,088 | 4,484  | 1  | ,034 | ,830   | ,698                | ,986  |
| season(3)  | ,144   | ,088 | 2,677  | 1  | ,102 | 1,155  | ,972                | 1,372 |
| season(4)  | -,030  | ,093 | ,100   | 1  | ,751 | ,971   | ,808                | 1,166 |
| Constant   | -2,116 | ,213 | 98,831 | 1  | ,000 | ,121   |                     |       |

a. Variable(s) entered on step 1: sv7, VASTY2, weekday, holiday, season.

\*\*

```
LOGISTIC REGRESSION VARIABLES luonnelt1
/METHOD=ENTER bv1 VASTY2 weekday holiday season
/CONTRAST (bv1)=Indicator(1)
/CONTRAST (VASTY2)=Indicator(1)
/CONTRAST (weekday)=Indicator(1)
/CONTRAST (holiday)=Indicator(1)
/CONTRAST (season)=Indicator(1)
/PRINT=CI(95)
/CRITERIA=PIN(0.05) POUT(0.10) ITERATE(20) CUT(0.5).
```

### Block 1: Method = Enter

#### Omnibus Tests of Model Coefficients

|        |       | Chi-square | df | Sig. |
|--------|-------|------------|----|------|
| Step 1 | Step  | 340,523    | 48 | ,000 |
|        | Block | 340,523    | 48 | ,000 |
|        | Model | 340,523    | 48 | ,000 |

**Model Summary**

| Step | -2 Log likelihood    | Cox & Snell R Square | Nagelkerke R Square |
|------|----------------------|----------------------|---------------------|
| 1    | 5856,35 <sup>a</sup> | ,027                 | ,069                |

a. Estimation terminated at iteration number 7 because parameter estimates changed by less than ,001.

**Classification Table<sup>a</sup>**

|                    |                                                |                                                              | Predicted                                    |
|--------------------|------------------------------------------------|--------------------------------------------------------------|----------------------------------------------|
|                    |                                                |                                                              | luonnelt1<br>luonne<br>highest = ...         |
| Observed           |                                                |                                                              | 0 ingen<br>händelse<br>eller läheltä<br>piti |
| Step 1             | luonnelt1 luonne highest = tapahtui potilaalle | 0 ingen händelse eller läheltä piti<br>1 tapahtui potilaalle | 11627<br>848                                 |
| Overall Percentage |                                                |                                                              |                                              |

**Classification Table<sup>a</sup>**

|                    |                                                |                                                              | Predicted                            |
|--------------------|------------------------------------------------|--------------------------------------------------------------|--------------------------------------|
|                    |                                                |                                                              | luonnelt1<br>luonne<br>highest = ... |
| Observed           |                                                |                                                              | 1 tapahtui<br>potilaalle             |
| Step 1             | luonnelt1 luonne highest = tapahtui potilaalle | 0 ingen händelse eller läheltä piti<br>1 tapahtui potilaalle | 0<br>0                               |
| Overall Percentage |                                                |                                                              |                                      |

Classification Table<sup>a</sup>

|                    |                                                |                                                              | Predicted          |
|--------------------|------------------------------------------------|--------------------------------------------------------------|--------------------|
|                    |                                                |                                                              |                    |
| Observed           |                                                |                                                              | Percentage Correct |
| Step 1             | luonnelt1 luonne highest = tapahtui potilaalle | 0 ingen händelse eller läheltä piti<br>1 tapahtui potilaalle | 100,0<br>,0        |
| Overall Percentage |                                                |                                                              | 93,2               |

a. The cut value is ,500

Variables in the Equation

|                     |            | B      | S.E. | Wald    | df | Sig. | Exp(B) | 95% C.I. for EXP(B) |       |
|---------------------|------------|--------|------|---------|----|------|--------|---------------------|-------|
|                     |            |        |      |         |    |      |        | Lower               | Upper |
| Step 1 <sup>a</sup> | bv1        |        |      | 8,766   | 2  | ,012 |        |                     |       |
|                     | bv1(1)     | -,246  | ,103 | 5,744   | 1  | ,017 | ,782   | ,640                | ,956  |
|                     | bv1(2)     | ,079   | ,086 | ,834    | 1  | ,361 | 1,082  | ,914                | 1,280 |
|                     | VASTY2     |        |      | 238,129 | 35 | ,000 |        |                     |       |
|                     | VASTY2(1)  | ,096   | ,299 | ,102    | 1  | ,750 | 1,100  | ,612                | 1,979 |
|                     | VASTY2(2)  | ,545   | ,275 | 3,944   | 1  | ,047 | 1,725  | 1,007               | 2,956 |
|                     | VASTY2(3)  | -1,490 | ,467 | 10,197  | 1  | ,001 | ,225   | ,090                | ,562  |
|                     | VASTY2(4)  | ,138   | ,294 | ,220    | 1  | ,639 | 1,148  | ,645                | 2,043 |
|                     | VASTY2(5)  | -,194  | ,325 | ,357    | 1  | ,550 | ,823   | ,435                | 1,557 |
|                     | VASTY2(6)  | -1,287 | ,440 | 8,574   | 1  | ,003 | ,276   | ,117                | ,653  |
|                     | VASTY2(7)  | ,548   | ,277 | 3,911   | 1  | ,048 | 1,729  | 1,005               | 2,976 |
|                     | VASTY2(8)  | -,255  | ,320 | ,632    | 1  | ,427 | ,775   | ,414                | 1,452 |
|                     | VASTY2(9)  | ,267   | ,291 | ,842    | 1  | ,359 | 1,307  | ,738                | 2,313 |
|                     | VASTY2(10) | 1,026  | ,259 | 15,764  | 1  | ,000 | 2,791  | 1,682               | 4,632 |
|                     | VASTY2(11) | ,616   | ,273 | 5,109   | 1  | ,024 | 1,852  | 1,085               | 3,160 |
|                     | VASTY2(12) | ,122   | ,295 | ,171    | 1  | ,679 | 1,130  | ,634                | 2,013 |
|                     | VASTY2(13) | ,983   | ,261 | 14,230  | 1  | ,000 | 2,673  | 1,604               | 4,456 |
|                     | VASTY2(14) | -,248  | ,320 | ,597    | 1  | ,440 | ,781   | ,417                | 1,463 |
|                     | VASTY2(15) | ,247   | ,288 | ,731    | 1  | ,392 | 1,280  | ,727                | 2,253 |
|                     | VASTY2(16) | ,411   | ,331 | 1,546   | 1  | ,214 | 1,509  | ,789                | 2,887 |
|                     | VASTY2(17) | -1,079 | ,418 | 6,664   | 1  | ,010 | ,340   | ,150                | ,771  |
|                     | VASTY2(18) | -,668  | ,365 | 3,352   | 1  | ,067 | ,513   | ,251                | 1,048 |
|                     | VASTY2(19) | -1,638 | ,551 | 8,843   | 1  | ,003 | ,194   | ,066                | ,572  |
|                     | VASTY2(20) | ,040   | ,314 | ,016    | 1  | ,899 | 1,041  | ,562                | 1,928 |
|                     | VASTY2(21) | -,124  | ,312 | ,158    | 1  | ,691 | ,883   | ,479                | 1,628 |
|                     | VASTY2(22) | ,316   | ,291 | 1,183   | 1  | ,277 | 1,372  | ,776                | 2,426 |
|                     | VASTY2(23) | ,286   | ,288 | ,986    | 1  | ,321 | 1,331  | ,757                | 2,342 |

Variables in the Equation

|            | B      | S.E. | Wald    | df | Sig. | Exp(B) | 95% C.I. for EXP(B) |       |
|------------|--------|------|---------|----|------|--------|---------------------|-------|
|            |        |      |         |    |      |        | Lower               | Upper |
| VASTY2(24) | ,263   | ,286 | ,847    | 1  | ,357 | 1,301  | ,743                | 2,280 |
| VASTY2(25) | ,300   | ,301 | ,996    | 1  | ,318 | 1,350  | ,749                | 2,435 |
| VASTY2(26) | -,945  | ,419 | 5,078   | 1  | ,024 | ,389   | ,171                | ,884  |
| VASTY2(27) | -1,461 | ,466 | 9,840   | 1  | ,002 | ,232   | ,093                | ,578  |
| VASTY2(28) | -1,012 | ,468 | 4,680   | 1  | ,031 | ,363   | ,145                | ,909  |
| VASTY2(29) | -1,039 | ,401 | 6,709   | 1  | ,010 | ,354   | ,161                | ,777  |
| VASTY2(30) | -,203  | ,316 | ,414    | 1  | ,520 | ,816   | ,439                | 1,516 |
| VASTY2(31) | ,499   | ,278 | 3,221   | 1  | ,073 | 1,648  | ,955                | 2,843 |
| VASTY2(32) | -,061  | ,313 | ,038    | 1  | ,845 | ,940   | ,509                | 1,737 |
| VASTY2(33) | ,012   | ,306 | ,002    | 1  | ,968 | 1,012  | ,556                | 1,843 |
| VASTY2(34) | -1,274 | ,439 | 8,429   | 1  | ,004 | ,280   | ,118                | ,661  |
| VASTY2(35) | ,650   | ,279 | 5,444   | 1  | ,020 | 1,915  | 1,110               | 3,307 |
| weekday    |        |      | 11,843  | 6  | ,066 |        |                     |       |
| weekday(1) | -,011  | ,129 | ,008    | 1  | ,929 | ,989   | ,767                | 1,274 |
| weekday(2) | -,033  | ,130 | ,066    | 1  | ,798 | ,967   | ,750                | 1,248 |
| weekday(3) | -,043  | ,130 | ,111    | 1  | ,740 | ,958   | ,742                | 1,237 |
| weekday(4) | ,042   | ,129 | ,107    | 1  | ,743 | 1,043  | ,810                | 1,343 |
| weekday(5) | -,225  | ,139 | 2,621   | 1  | ,105 | ,798   | ,608                | 1,049 |
| weekday(6) | -,361  | ,143 | 6,344   | 1  | ,012 | ,697   | ,526                | ,923  |
| holiday(1) | -,435  | ,253 | 2,966   | 1  | ,085 | ,647   | ,394                | 1,062 |
| season     |        |      | 3,733   | 4  | ,443 |        |                     |       |
| season(1)  | -,115  | ,113 | 1,020   | 1  | ,313 | ,892   | ,714                | 1,114 |
| season(2)  | -,110  | ,106 | 1,085   | 1  | ,298 | ,896   | ,728                | 1,102 |
| season(3)  | ,070   | ,108 | ,423    | 1  | ,516 | 1,073  | ,868                | 1,327 |
| season(4)  | -,073  | ,115 | ,405    | 1  | ,525 | ,929   | ,742                | 1,165 |
| Constant   | -2,497 | ,241 | 107,046 | 1  | ,000 | ,082   |                     |       |

a. Variable(s) entered on step 1: bv1, VASTY2, weekday, holiday, season.

```

LOGISTIC REGRESSION VARIABLES luonnelt1
/METHOD=ENTER bv2 VASTY2 weekday holiday season
/CONTRAST (bv2)=Indicator(1)
/CONTRAST (VASTY2)=Indicator(1)
/CONTRAST (weekday)=Indicator(1)
/CONTRAST (holiday)=Indicator(1)
/CONTRAST (season)=Indicator(1)
/PRINT=CI(95)
/CRITERIA=PIN(0.05) POUT(0.10) ITERATE(20) CUT(0.5).

```

**Block 1: Method = Enter**

## Omnibus Tests of Model Coefficients

|        |       | Chi-square | df | Sig. |
|--------|-------|------------|----|------|
| Step 1 | Step  | 336,814    | 48 | ,000 |
|        | Block | 336,814    | 48 | ,000 |
|        | Model | 336,814    | 48 | ,000 |

## Model Summary

| Step | -2 Log likelihood    | Cox & Snell R Square | Nagelkerke R Square |
|------|----------------------|----------------------|---------------------|
| 1    | 5860,06 <sup>a</sup> | ,027                 | ,068                |

a. Estimation terminated at iteration number 7 because parameter estimates changed by less than ,001.

Classification Table<sup>a</sup>

|                    |                                                |                                                              | Predicted                                    |
|--------------------|------------------------------------------------|--------------------------------------------------------------|----------------------------------------------|
|                    |                                                |                                                              | luonnelt1<br>luonne<br>highest = ..          |
| Observed           |                                                |                                                              | 0 ingen<br>händelse<br>eller läheltä<br>piti |
| Step 1             | luonnelt1 luonne highest = tapahtui potilaalle | 0 ingen händelse eller läheltä piti<br>1 tapahtui potilaalle | 11627<br>848                                 |
| Overall Percentage |                                                |                                                              |                                              |

Classification Table<sup>a</sup>

|                    |                                                |                                                              | Predicted                            |
|--------------------|------------------------------------------------|--------------------------------------------------------------|--------------------------------------|
|                    |                                                |                                                              | luonnelt1<br>luonne<br>highest = ... |
| Observed           |                                                |                                                              | 1 tapahtui<br>potilaalle             |
| Step 1             | luonnelt1 luonne highest = tapahtui potilaalle | 0 ingen händelse eller läheltä piti<br>1 tapahtui potilaalle | 0<br>0                               |
| Overall Percentage |                                                |                                                              |                                      |

Classification Table<sup>a</sup>

|                    |                                                |                                                              | Predicted          |
|--------------------|------------------------------------------------|--------------------------------------------------------------|--------------------|
|                    |                                                |                                                              |                    |
| Observed           |                                                |                                                              | Percentage Correct |
| Step 1             | luonnelt1 luonne highest = tapahtui potilaalle | 0 ingen händelse eller läheltä piti<br>1 tapahtui potilaalle | 100,0<br>,0        |
| Overall Percentage |                                                |                                                              | 93,2               |

a. The cut value is ,500

Variables in the Equation

|                     |            | B      | S.E. | Wald    | df | Sig. | Exp(B) | 95% C.I. for EXP(B) |       |
|---------------------|------------|--------|------|---------|----|------|--------|---------------------|-------|
|                     |            |        |      |         |    |      |        | Lower               | Upper |
| Step 1 <sup>a</sup> | bv2        |        |      | 5,271   | 2  | ,072 |        |                     |       |
|                     | bv2(1)     | -,148  | ,103 | 2,044   | 1  | ,153 | ,863   | ,705                | 1,056 |
|                     | bv2(2)     | ,066   | ,095 | ,481    | 1  | ,488 | 1,068  | ,887                | 1,285 |
|                     | VASTY2     |        |      | 240,171 | 35 | ,000 |        |                     |       |
|                     | VASTY2(1)  | ,086   | ,299 | ,082    | 1  | ,774 | 1,090  | ,606                | 1,960 |
|                     | VASTY2(2)  | ,550   | ,275 | 4,013   | 1  | ,045 | 1,734  | 1,012               | 2,970 |
|                     | VASTY2(3)  | -1,471 | ,466 | 9,950   | 1  | ,002 | ,230   | ,092                | ,573  |
|                     | VASTY2(4)  | ,148   | ,294 | ,255    | 1  | ,613 | 1,160  | ,652                | 2,063 |
|                     | VASTY2(5)  | -,194  | ,325 | ,355    | 1  | ,551 | ,824   | ,436                | 1,558 |
|                     | VASTY2(6)  | -1,277 | ,439 | 8,456   | 1  | ,004 | ,279   | ,118                | ,659  |
|                     | VASTY2(7)  | ,560   | ,276 | 4,130   | 1  | ,042 | 1,752  | 1,020               | 3,007 |
|                     | VASTY2(8)  | -,250  | ,320 | ,608    | 1  | ,436 | ,779   | ,416                | 1,459 |
|                     | VASTY2(9)  | ,270   | ,291 | ,856    | 1  | ,355 | 1,309  | ,740                | 2,318 |
|                     | VASTY2(10) | 1,036  | ,259 | 16,065  | 1  | ,000 | 2,819  | 1,698               | 4,679 |
|                     | VASTY2(11) | ,617   | ,272 | 5,122   | 1  | ,024 | 1,852  | 1,086               | 3,160 |
|                     | VASTY2(12) | ,129   | ,295 | ,193    | 1  | ,661 | 1,138  | ,639                | 2,029 |
|                     | VASTY2(13) | ,993   | ,261 | 14,512  | 1  | ,000 | 2,701  | 1,620               | 4,502 |
|                     | VASTY2(14) | -,245  | ,320 | ,587    | 1  | ,444 | ,782   | ,418                | 1,466 |
|                     | VASTY2(15) | ,246   | ,289 | ,728    | 1  | ,393 | 1,279  | ,727                | 2,253 |
|                     | VASTY2(16) | ,404   | ,331 | 1,490   | 1  | ,222 | 1,497  | ,783                | 2,862 |
|                     | VASTY2(17) | -1,083 | ,418 | 6,711   | 1  | ,010 | ,339   | ,149                | ,768  |
|                     | VASTY2(18) | -,677  | ,365 | 3,442   | 1  | ,064 | ,508   | ,249                | 1,039 |
|                     | VASTY2(19) | -1,706 | ,549 | 9,647   | 1  | ,002 | ,182   | ,062                | ,533  |
|                     | VASTY2(20) | ,046   | ,314 | ,021    | 1  | ,884 | 1,047  | ,566                | 1,938 |
|                     | VASTY2(21) | -,122  | ,312 | ,152    | 1  | ,697 | ,886   | ,480                | 1,632 |
|                     | VASTY2(22) | ,307   | ,291 | 1,111   | 1  | ,292 | 1,359  | ,768                | 2,404 |
|                     | VASTY2(23) | ,278   | ,288 | ,928    | 1  | ,335 | 1,320  | ,750                | 2,322 |



## Variables in the Equation

|            | B      | S.E. | Wald    | df | Sig. | Exp(B) | 95% C.I. for EXP(B) |       |
|------------|--------|------|---------|----|------|--------|---------------------|-------|
|            |        |      |         |    |      |        | Lower               | Upper |
| VASTY2(24) | ,280   | ,286 | ,955    | 1  | ,328 | 1,323  | ,755                | 2,317 |
| VASTY2(25) | ,300   | ,301 | ,995    | 1  | ,318 | 1,350  | ,749                | 2,435 |
| VASTY2(26) | -,945  | ,419 | 5,081   | 1  | ,024 | ,389   | ,171                | ,884  |
| VASTY2(27) | -1,460 | ,466 | 9,827   | 1  | ,002 | ,232   | ,093                | ,579  |
| VASTY2(28) | -1,008 | ,468 | 4,635   | 1  | ,031 | ,365   | ,146                | ,914  |
| VASTY2(29) | -1,028 | ,401 | 6,576   | 1  | ,010 | ,358   | ,163                | ,785  |
| VASTY2(30) | -,194  | ,316 | ,376    | 1  | ,540 | ,824   | ,444                | 1,530 |
| VASTY2(31) | ,490   | ,278 | 3,110   | 1  | ,078 | 1,632  | ,947                | 2,813 |
| VASTY2(32) | -,082  | ,312 | ,068    | 1  | ,794 | ,922   | ,500                | 1,700 |
| VASTY2(33) | -,002  | ,305 | ,000    | 1  | ,993 | ,998   | ,548                | 1,815 |
| VASTY2(34) | -1,268 | ,439 | 8,351   | 1  | ,004 | ,281   | ,119                | ,665  |
| VASTY2(35) | ,659   | ,278 | 5,637   | 1  | ,018 | 1,933  | 1,122               | 3,331 |
| weekday    |        |      | 12,024  | 6  | ,061 |        |                     |       |
| weekday(1) | -,007  | ,129 | ,003    | 1  | ,959 | ,993   | ,771                | 1,280 |
| weekday(2) | -,030  | ,130 | ,053    | 1  | ,818 | ,971   | ,752                | 1,252 |
| weekday(3) | -,041  | ,130 | ,097    | 1  | ,755 | ,960   | ,744                | 1,240 |
| weekday(4) | ,039   | ,129 | ,090    | 1  | ,764 | 1,039  | ,807                | 1,338 |
| weekday(5) | -,228  | ,139 | 2,691   | 1  | ,101 | ,796   | ,606                | 1,045 |
| weekday(6) | -,363  | ,144 | 6,400   | 1  | ,011 | ,695   | ,525                | ,921  |
| holiday(1) | -,438  | ,253 | 3,006   | 1  | ,083 | ,645   | ,393                | 1,059 |
| season     |        |      | 3,856   | 4  | ,426 |        |                     |       |
| season(1)  | -,115  | ,113 | 1,031   | 1  | ,310 | ,891   | ,714                | 1,113 |
| season(2)  | -,120  | ,106 | 1,285   | 1  | ,257 | ,887   | ,721                | 1,091 |
| season(3)  | ,066   | ,108 | ,370    | 1  | ,543 | 1,068  | ,864                | 1,321 |
| season(4)  | -,078  | ,115 | ,457    | 1  | ,499 | ,925   | ,738                | 1,159 |
| Constant   | -2,505 | ,246 | 103,317 | 1  | ,000 | ,082   |                     |       |

a. Variable(s) entered on step 1: bv2, VASTY2, weekday, holiday, season.

```

LOGISTIC REGRESSION VARIABLES luonnelt1
/METHOD=ENTER bv3 VASTY2 weekday holiday season
/CONTRAST (bv3)=Indicator(1)
/CONTRAST (VASTY2)=Indicator(1)
/CONTRAST (weekday)=Indicator(1)
/CONTRAST (holiday)=Indicator(1)
/CONTRAST (season)=Indicator(1)
/PRINT=CI(95)
/CRITERIA=PIN(0.05) POUT(0.10) ITERATE(20) CUT(0.5).

```

**Block 1: Method = Enter**

## Omnibus Tests of Model Coefficients

|        |       | Chi-square | df | Sig. |
|--------|-------|------------|----|------|
| Step 1 | Step  | 337,695    | 48 | ,000 |
|        | Block | 337,695    | 48 | ,000 |
|        | Model | 337,695    | 48 | ,000 |

## Model Summary

| Step | -2 Log likelihood    | Cox & Snell R Square | Nagelkerke R Square |
|------|----------------------|----------------------|---------------------|
| 1    | 5859,18 <sup>a</sup> | ,027                 | ,068                |

a. Estimation terminated at iteration number 7 because parameter estimates changed by less than ,001.

Classification Table<sup>a</sup>

|                    |                                                |                                                              | Predicted                                    |
|--------------------|------------------------------------------------|--------------------------------------------------------------|----------------------------------------------|
|                    |                                                |                                                              | luonnelt1<br>luonne<br>highest = ..          |
| Observed           |                                                |                                                              | 0 ingen<br>händelse<br>eller läheltä<br>piti |
| Step 1             | luonnelt1 luonne highest = tapahtui potilaalle | 0 ingen händelse eller läheltä piti<br>1 tapahtui potilaalle | 11627<br>848                                 |
| Overall Percentage |                                                |                                                              |                                              |

Classification Table<sup>a</sup>

|                    |                                                |                                                              | Predicted                            |
|--------------------|------------------------------------------------|--------------------------------------------------------------|--------------------------------------|
|                    |                                                |                                                              | luonnelt1<br>luonne<br>highest = ... |
| Observed           |                                                |                                                              | 1 tapahtui<br>potilaalle             |
| Step 1             | luonnelt1 luonne highest = tapahtui potilaalle | 0 ingen händelse eller läheltä piti<br>1 tapahtui potilaalle | 0<br>0                               |
| Overall Percentage |                                                |                                                              |                                      |

Classification Table<sup>a</sup>

|                    |                                                |                                                              | Predicted          |
|--------------------|------------------------------------------------|--------------------------------------------------------------|--------------------|
|                    |                                                |                                                              |                    |
| Observed           |                                                |                                                              | Percentage Correct |
| Step 1             | luonnelt1 luonne highest = tapahtui potilaalle | 0 ingen händelse eller läheltä piti<br>1 tapahtui potilaalle | 100,0<br>,0        |
| Overall Percentage |                                                |                                                              | 93,2               |

a. The cut value is ,500

Variables in the Equation

|                     |            | B      | S.E. | Wald    | df | Sig. | Exp(B) | 95% C.I. for EXP(B) |       |
|---------------------|------------|--------|------|---------|----|------|--------|---------------------|-------|
|                     |            |        |      |         |    |      |        | Lower               | Upper |
| Step 1 <sup>a</sup> | bv3        |        |      | 5,945   | 2  | ,051 |        |                     |       |
|                     | bv3(1)     | -,292  | ,141 | 4,310   | 1  | ,038 | ,746   | ,566                | ,984  |
|                     | bv3(2)     | ,107   | ,104 | 1,059   | 1  | ,303 | 1,113  | ,907                | 1,366 |
|                     | VASTY2     |        |      | 242,042 | 35 | ,000 |        |                     |       |
|                     | VASTY2(1)  | ,118   | ,299 | ,156    | 1  | ,693 | 1,126  | ,626                | 2,025 |
|                     | VASTY2(2)  | ,566   | ,274 | 4,258   | 1  | ,039 | 1,762  | 1,029               | 3,017 |
|                     | VASTY2(3)  | -1,454 | ,466 | 9,719   | 1  | ,002 | ,234   | ,094                | ,583  |
|                     | VASTY2(4)  | ,163   | ,294 | ,307    | 1  | ,579 | 1,177  | ,662                | 2,094 |
|                     | VASTY2(5)  | -,175  | ,325 | ,290    | 1  | ,590 | ,839   | ,444                | 1,587 |
|                     | VASTY2(6)  | -1,266 | ,440 | 8,299   | 1  | ,004 | ,282   | ,119                | ,667  |
|                     | VASTY2(7)  | ,567   | ,279 | 4,136   | 1  | ,042 | 1,763  | 1,021               | 3,046 |
|                     | VASTY2(8)  | -,223  | ,320 | ,489    | 1  | ,485 | ,800   | ,427                | 1,497 |
|                     | VASTY2(9)  | ,297   | ,291 | 1,040   | 1  | ,308 | 1,345  | ,761                | 2,379 |
|                     | VASTY2(10) | 1,055  | ,258 | 16,714  | 1  | ,000 | 2,872  | 1,732               | 4,763 |
|                     | VASTY2(11) | ,631   | ,272 | 5,363   | 1  | ,021 | 1,879  | 1,102               | 3,206 |
|                     | VASTY2(12) | ,154   | ,294 | ,274    | 1  | ,601 | 1,166  | ,655                | 2,077 |
|                     | VASTY2(13) | 1,034  | ,259 | 15,951  | 1  | ,000 | 2,813  | 1,693               | 4,673 |
|                     | VASTY2(14) | -,222  | ,320 | ,481    | 1  | ,488 | ,801   | ,428                | 1,500 |
|                     | VASTY2(15) | ,271   | ,288 | ,886    | 1  | ,347 | 1,312  | ,746                | 2,307 |
|                     | VASTY2(16) | ,411   | ,332 | 1,537   | 1  | ,215 | 1,509  | ,787                | 2,891 |
|                     | VASTY2(17) | -1,091 | ,418 | 6,822   | 1  | ,009 | ,336   | ,148                | ,762  |
|                     | VASTY2(18) | -,669  | ,365 | 3,356   | 1  | ,067 | ,512   | ,251                | 1,048 |
|                     | VASTY2(19) | -1,634 | ,553 | 8,739   | 1  | ,003 | ,195   | ,066                | ,577  |
|                     | VASTY2(20) | ,059   | ,315 | ,036    | 1  | ,850 | 1,061  | ,573                | 1,966 |
|                     | VASTY2(21) | -,108  | ,312 | ,120    | 1  | ,729 | ,898   | ,487                | 1,654 |
|                     | VASTY2(22) | ,280   | ,290 | ,933    | 1  | ,334 | 1,324  | ,749                | 2,338 |
|                     | VASTY2(23) | ,286   | ,288 | ,986    | 1  | ,321 | 1,331  | ,757                | 2,342 |

## Variables in the Equation

|            | B      | S.E. | Wald    | df | Sig. | Exp(B) | 95% C.I. for EXP(B) |       |
|------------|--------|------|---------|----|------|--------|---------------------|-------|
|            |        |      |         |    |      |        | Lower               | Upper |
| VASTY2(24) | ,290   | ,286 | 1,029   | 1  | ,310 | 1,336  | ,763                | 2,340 |
| VASTY2(25) | ,314   | ,301 | 1,086   | 1  | ,297 | 1,369  | ,759                | 2,470 |
| VASTY2(26) | -,920  | ,419 | 4,817   | 1  | ,028 | ,399   | ,175                | ,906  |
| VASTY2(27) | -1,430 | ,465 | 9,449   | 1  | ,002 | ,239   | ,096                | ,595  |
| VASTY2(28) | -,969  | ,468 | 4,300   | 1  | ,038 | ,379   | ,152                | ,948  |
| VASTY2(29) | -1,025 | ,401 | 6,538   | 1  | ,011 | ,359   | ,164                | ,787  |
| VASTY2(30) | -,196  | ,316 | ,384    | 1  | ,535 | ,822   | ,443                | 1,527 |
| VASTY2(31) | ,520   | ,279 | 3,467   | 1  | ,063 | 1,682  | ,973                | 2,908 |
| VASTY2(32) | -,043  | ,314 | ,018    | 1  | ,892 | ,958   | ,518                | 1,774 |
| VASTY2(33) | ,035   | ,307 | ,013    | 1  | ,909 | 1,036  | ,568                | 1,889 |
| VASTY2(34) | -1,262 | ,439 | 8,285   | 1  | ,004 | ,283   | ,120                | ,668  |
| VASTY2(35) | ,670   | ,279 | 5,760   | 1  | ,016 | 1,953  | 1,131               | 3,375 |
| weekday    |        |      | 12,001  | 6  | ,062 |        |                     |       |
| weekday(1) | -,011  | ,129 | ,007    | 1  | ,932 | ,989   | ,768                | 1,274 |
| weekday(2) | -,037  | ,130 | ,083    | 1  | ,773 | ,963   | ,747                | 1,243 |
| weekday(3) | -,048  | ,130 | ,134    | 1  | ,715 | ,953   | ,738                | 1,231 |
| weekday(4) | ,035   | ,129 | ,072    | 1  | ,788 | 1,035  | ,804                | 1,333 |
| weekday(5) | -,238  | ,139 | 2,932   | 1  | ,087 | ,788   | ,600                | 1,035 |
| weekday(6) | -,363  | ,144 | 6,396   | 1  | ,011 | ,696   | ,525                | ,922  |
| holiday(1) | -,441  | ,253 | 3,048   | 1  | ,081 | ,643   | ,392                | 1,056 |
| season     |        |      | 3,977   | 4  | ,409 |        |                     |       |
| season(1)  | -,115  | ,113 | 1,032   | 1  | ,310 | ,891   | ,714                | 1,113 |
| season(2)  | -,123  | ,106 | 1,350   | 1  | ,245 | ,885   | ,719                | 1,088 |
| season(3)  | ,067   | ,108 | ,388    | 1  | ,533 | 1,070  | ,865                | 1,323 |
| season(4)  | -,077  | ,115 | ,444    | 1  | ,505 | ,926   | ,739                | 1,161 |
| Constant   | -2,524 | ,240 | 110,913 | 1  | ,000 | ,080   |                     |       |

a. Variable(s) entered on step 1: bv3, VASTY2, weekday, holiday, season.

```

LOGISTIC REGRESSION VARIABLES luonnelt1
/METHOD=ENTER sv3 VASTY2 weekday holiday season
/CONTRAST (sv3)=Indicator(1)
/CONTRAST (VASTY2)=Indicator(1)
/CONTRAST (weekday)=Indicator(1)
/CONTRAST (holiday)=Indicator(1)
/CONTRAST (season)=Indicator(1)
/PRINT=CI(95)
/CRITERIA=PIN(0.05) POUT(0.10) ITERATE(20) CUT(0.5).

```

**Block 1: Method = Enter**

## Omnibus Tests of Model Coefficients

|        |       | Chi-square | df | Sig. |
|--------|-------|------------|----|------|
| Step 1 | Step  | 333,765    | 48 | ,000 |
|        | Block | 333,765    | 48 | ,000 |
|        | Model | 333,765    | 48 | ,000 |

## Model Summary

| Step | -2 Log likelihood    | Cox & Snell R Square | Nagelkerke R Square |
|------|----------------------|----------------------|---------------------|
| 1    | 5863,11 <sup>a</sup> | ,026                 | ,067                |

a. Estimation terminated at iteration number 7 because parameter estimates changed by less than ,001.

Classification Table<sup>a</sup>

|                    |                                                |                                                              | Predicted                                    |
|--------------------|------------------------------------------------|--------------------------------------------------------------|----------------------------------------------|
|                    |                                                |                                                              | luonnelt1<br>luonne<br>highest = ..          |
| Observed           |                                                |                                                              | 0 ingen<br>händelse<br>eller läheltä<br>piti |
| Step 1             | luonnelt1 luonne highest = tapahtui potilaalle | 0 ingen händelse eller läheltä piti<br>1 tapahtui potilaalle | 11627<br>848                                 |
| Overall Percentage |                                                |                                                              |                                              |

Classification Table<sup>a</sup>

|                    |                                                |                                                              | Predicted                            |
|--------------------|------------------------------------------------|--------------------------------------------------------------|--------------------------------------|
|                    |                                                |                                                              | luonnelt1<br>luonne<br>highest = ... |
| Observed           |                                                |                                                              | 1 tapahtui<br>potilaalle             |
| Step 1             | luonnelt1 luonne highest = tapahtui potilaalle | 0 ingen händelse eller läheltä piti<br>1 tapahtui potilaalle | 0<br>0                               |
| Overall Percentage |                                                |                                                              |                                      |

Classification Table<sup>a</sup>

|                    |                                                |                                                              | Predicted          |
|--------------------|------------------------------------------------|--------------------------------------------------------------|--------------------|
| Observed           |                                                |                                                              | Percentage Correct |
| Step 1             | luonnelt1 luonne highest = tapahtui potilaalle | 0 ingen händelse eller läheltä piti<br>1 tapahtui potilaalle | 100,0<br>,0        |
| Overall Percentage |                                                |                                                              | 93,2               |

a. The cut value is ,500

Variables in the Equation

|                     |            | B      | S.E. | Wald    | df | Sig. | Exp(B) | 95% C.I. for EXP(B) |       |
|---------------------|------------|--------|------|---------|----|------|--------|---------------------|-------|
|                     |            |        |      |         |    |      |        | Lower               | Upper |
| Step 1 <sup>a</sup> | sv3        |        |      | 2,302   | 2  | ,316 |        |                     |       |
|                     | sv3(1)     | -,017  | ,107 | ,026    | 1  | ,873 | ,983   | ,797                | 1,212 |
|                     | sv3(2)     | ,137   | ,104 | 1,734   | 1  | ,188 | 1,146  | ,935                | 1,405 |
|                     | VASTY2     |        |      | 233,198 | 35 | ,000 |        |                     |       |
|                     | VASTY2(1)  | ,063   | ,300 | ,044    | 1  | ,834 | 1,065  | ,591                | 1,918 |
|                     | VASTY2(2)  | ,506   | ,278 | 3,304   | 1  | ,069 | 1,659  | ,961                | 2,863 |
|                     | VASTY2(3)  | -1,377 | ,465 | 8,767   | 1  | ,003 | ,252   | ,101                | ,628  |
|                     | VASTY2(4)  | ,216   | ,292 | ,548    | 1  | ,459 | 1,242  | ,700                | 2,202 |
|                     | VASTY2(5)  | -,127  | ,326 | ,152    | 1  | ,696 | ,880   | ,464                | 1,669 |
|                     | VASTY2(6)  | -1,326 | ,443 | 8,975   | 1  | ,003 | ,266   | ,112                | ,632  |
|                     | VASTY2(7)  | ,655   | ,272 | 5,778   | 1  | ,016 | 1,925  | 1,128               | 3,283 |
|                     | VASTY2(8)  | -,172  | ,320 | ,287    | 1  | ,592 | ,842   | ,449                | 1,578 |
|                     | VASTY2(9)  | ,316   | ,290 | 1,185   | 1  | ,276 | 1,372  | ,776                | 2,424 |
|                     | VASTY2(10) | ,992   | ,264 | 14,138  | 1  | ,000 | 2,697  | 1,608               | 4,523 |
|                     | VASTY2(11) | ,633   | ,272 | 5,405   | 1  | ,020 | 1,883  | 1,104               | 3,211 |
|                     | VASTY2(12) | ,103   | ,298 | ,120    | 1  | ,729 | 1,109  | ,618                | 1,987 |
|                     | VASTY2(13) | ,984   | ,265 | 13,793  | 1  | ,000 | 2,676  | 1,592               | 4,498 |
|                     | VASTY2(14) | -,254  | ,321 | ,625    | 1  | ,429 | ,776   | ,413                | 1,456 |
|                     | VASTY2(15) | ,211   | ,292 | ,521    | 1  | ,470 | 1,235  | ,696                | 2,190 |
|                     | VASTY2(16) | ,385   | ,331 | 1,351   | 1  | ,245 | 1,469  | ,768                | 2,811 |
|                     | VASTY2(17) | -1,089 | ,418 | 6,776   | 1  | ,009 | ,337   | ,148                | ,764  |
|                     | VASTY2(18) | -,626  | ,371 | 2,847   | 1  | ,092 | ,535   | ,258                | 1,106 |
|                     | VASTY2(19) | -1,757 | ,552 | 10,144  | 1  | ,001 | ,173   | ,059                | ,509  |
|                     | VASTY2(20) | ,033   | ,315 | ,011    | 1  | ,915 | 1,034  | ,558                | 1,917 |
|                     | VASTY2(21) | -,079  | ,312 | ,063    | 1  | ,801 | ,924   | ,501                | 1,704 |
|                     | VASTY2(22) | ,247   | ,290 | ,727    | 1  | ,394 | 1,280  | ,725                | 2,260 |
|                     | VASTY2(23) | ,278   | ,288 | ,933    | 1  | ,334 | 1,321  | ,751                | 2,324 |

## Variables in the Equation

|            | B      | S.E. | Wald    | df | Sig. | Exp(B) | 95% C.I. for EXP(B) |       |
|------------|--------|------|---------|----|------|--------|---------------------|-------|
|            |        |      |         |    |      |        | Lower               | Upper |
| VASTY2(24) | ,307   | ,285 | 1,157   | 1  | ,282 | 1,359  | ,777                | 2,376 |
| VASTY2(25) | ,318   | ,302 | 1,111   | 1  | ,292 | 1,375  | ,761                | 2,484 |
| VASTY2(26) | -,922  | ,419 | 4,848   | 1  | ,028 | ,398   | ,175                | ,904  |
| VASTY2(27) | -1,475 | ,467 | 9,986   | 1  | ,002 | ,229   | ,092                | ,571  |
| VASTY2(28) | -1,043 | ,472 | 4,893   | 1  | ,027 | ,352   | ,140                | ,888  |
| VASTY2(29) | -1,106 | ,407 | 7,398   | 1  | ,007 | ,331   | ,149                | ,734  |
| VASTY2(30) | -,146  | ,317 | ,212    | 1  | ,645 | ,864   | ,465                | 1,608 |
| VASTY2(31) | ,541   | ,284 | 3,632   | 1  | ,057 | 1,718  | ,985                | 2,997 |
| VASTY2(32) | -,055  | ,320 | ,030    | 1  | ,863 | ,946   | ,505                | 1,772 |
| VASTY2(33) | ,034   | ,313 | ,012    | 1  | ,913 | 1,035  | ,560                | 1,913 |
| VASTY2(34) | -1,254 | ,439 | 8,181   | 1  | ,004 | ,285   | ,121                | ,674  |
| VASTY2(35) | ,688   | ,276 | 6,204   | 1  | ,013 | 1,991  | 1,158               | 3,422 |
| weekday    |        |      | 13,128  | 6  | ,041 |        |                     |       |
| weekday(1) | -,007  | ,129 | ,003    | 1  | ,958 | ,993   | ,771                | 1,279 |
| weekday(2) | -,028  | ,130 | ,047    | 1  | ,828 | ,972   | ,753                | 1,254 |
| weekday(3) | -,039  | ,131 | ,087    | 1  | ,768 | ,962   | ,745                | 1,243 |
| weekday(4) | ,042   | ,129 | ,108    | 1  | ,743 | 1,043  | ,810                | 1,344 |
| weekday(5) | -,239  | ,139 | 2,932   | 1  | ,087 | ,788   | ,599                | 1,035 |
| weekday(6) | -,376  | ,143 | 6,871   | 1  | ,009 | ,687   | ,518                | ,910  |
| holiday(1) | -,451  | ,253 | 3,175   | 1  | ,075 | ,637   | ,388                | 1,046 |
| season     |        |      | 4,327   | 4  | ,364 |        |                     |       |
| season(1)  | -,120  | ,113 | 1,130   | 1  | ,288 | ,886   | ,710                | 1,107 |
| season(2)  | -,137  | ,106 | 1,687   | 1  | ,194 | ,872   | ,709                | 1,072 |
| season(3)  | ,061   | ,108 | ,322    | 1  | ,570 | 1,063  | ,860                | 1,315 |
| season(4)  | -,084  | ,115 | ,537    | 1  | ,463 | ,919   | ,734                | 1,152 |
| Constant   | -2,572 | ,244 | 110,717 | 1  | ,000 | ,076   |                     |       |

a. Variable(s) entered on step 1: sv3, VASTY2, weekday, holiday, season.

```

LOGISTIC REGRESSION VARIABLES luonnelt1
/METHOD=ENTER sv5 VASTY2 weekday holiday season
/CONTRAST (sv5)=Indicator(1)
/CONTRAST (VASTY2)=Indicator(1)
/CONTRAST (weekday)=Indicator(1)
/CONTRAST (holiday)=Indicator(1)
/CONTRAST (season)=Indicator(1)
/PRINT=CI(95)
/CRITERIA=PIN(0.05) POUT(0.10) ITERATE(20) CUT(0.5).

```

**Block 1: Method = Enter**

## Omnibus Tests of Model Coefficients

|        |       | Chi-square | df | Sig. |
|--------|-------|------------|----|------|
| Step 1 | Step  | 334,570    | 50 | ,000 |
|        | Block | 334,570    | 50 | ,000 |
|        | Model | 334,570    | 50 | ,000 |

## Model Summary

| Step | -2 Log likelihood    | Cox & Snell R Square | Nagelkerke R Square |
|------|----------------------|----------------------|---------------------|
| 1    | 5862,30 <sup>a</sup> | ,026                 | ,068                |

a. Estimation terminated at iteration number 7 because parameter estimates changed by less than ,001.

Classification Table<sup>a</sup>

|                    |                                                   |                                                              | Predicted                                    |
|--------------------|---------------------------------------------------|--------------------------------------------------------------|----------------------------------------------|
|                    |                                                   |                                                              | luonnelt1<br>luonne<br>highest = ..          |
| Observed           |                                                   |                                                              | 0 ingen<br>händelse<br>eller läheltä<br>piti |
| Step 1             | luonnelt1 luonne highest = tapahtui<br>potilaalle | 0 ingen händelse eller läheltä piti<br>1 tapahtui potilaalle | 11627<br>848                                 |
| Overall Percentage |                                                   |                                                              |                                              |

Classification Table<sup>a</sup>

|                    |                                                   |                                                              | Predicted                            |
|--------------------|---------------------------------------------------|--------------------------------------------------------------|--------------------------------------|
|                    |                                                   |                                                              | luonnelt1<br>luonne<br>highest = ... |
| Observed           |                                                   |                                                              | 1 tapahtui<br>potilaalle             |
| Step 1             | luonnelt1 luonne highest = tapahtui<br>potilaalle | 0 ingen händelse eller läheltä piti<br>1 tapahtui potilaalle | 0<br>0                               |
| Overall Percentage |                                                   |                                                              |                                      |



Classification Table<sup>a</sup>

|                    |                                                |                                                              | Predicted          |
|--------------------|------------------------------------------------|--------------------------------------------------------------|--------------------|
|                    |                                                |                                                              |                    |
| Observed           |                                                |                                                              | Percentage Correct |
| Step 1             | luonnelt1 luonne highest = tapahtui potilaalle | 0 ingen händelse eller läheltä piti<br>1 tapahtui potilaalle | 100,0<br>,0        |
| Overall Percentage |                                                |                                                              | 93,2               |

a. The cut value is ,500

Variables in the Equation

|                     |            | B      | S.E. | Wald    | df | Sig. | Exp(B) | 95% C.I. for EXP(B) |       |
|---------------------|------------|--------|------|---------|----|------|--------|---------------------|-------|
|                     |            |        |      |         |    |      |        | Lower               | Upper |
| Step 1 <sup>a</sup> | sv5        |        |      | 3,122   | 4  | ,538 |        |                     |       |
|                     | sv5(1)     | -,028  | ,135 | ,043    | 1  | ,835 | ,972   | ,747                | 1,266 |
|                     | sv5(2)     | -,011  | ,137 | ,007    | 1  | ,934 | ,989   | ,757                | 1,292 |
|                     | sv5(3)     | -,003  | ,125 | ,001    | 1  | ,980 | ,997   | ,781                | 1,273 |
|                     | sv5(4)     | ,179   | ,135 | 1,765   | 1  | ,184 | 1,196  | ,918                | 1,557 |
|                     | VASTY2     |        |      | 233,751 | 35 | ,000 |        |                     |       |
|                     | VASTY2(1)  | ,060   | ,300 | ,040    | 1  | ,842 | 1,062  | ,589                | 1,913 |
|                     | VASTY2(2)  | ,480   | ,281 | 2,925   | 1  | ,087 | 1,616  | ,932                | 2,802 |
|                     | VASTY2(3)  | -1,387 | ,465 | 8,894   | 1  | ,003 | ,250   | ,100                | ,622  |
|                     | VASTY2(4)  | ,215   | ,292 | ,542    | 1  | ,462 | 1,240  | ,699                | 2,199 |
|                     | VASTY2(5)  | -,146  | ,327 | ,199    | 1  | ,656 | ,865   | ,456                | 1,640 |
|                     | VASTY2(6)  | -1,377 | ,446 | 9,521   | 1  | ,002 | ,252   | ,105                | ,605  |
|                     | VASTY2(7)  | ,652   | ,272 | 5,729   | 1  | ,017 | 1,919  | 1,125               | 3,273 |
|                     | VASTY2(8)  | -,189  | ,321 | ,349    | 1  | ,555 | ,827   | ,441                | 1,552 |
|                     | VASTY2(9)  | ,320   | ,290 | 1,217   | 1  | ,270 | 1,378  | ,780                | 2,434 |
|                     | VASTY2(10) | ,961   | ,267 | 12,923  | 1  | ,000 | 2,613  | 1,548               | 4,412 |
|                     | VASTY2(11) | ,627   | ,272 | 5,308   | 1  | ,021 | 1,873  | 1,098               | 3,193 |
|                     | VASTY2(12) | ,095   | ,299 | ,102    | 1  | ,750 | 1,100  | ,613                | 1,975 |
|                     | VASTY2(13) | ,951   | ,269 | 12,512  | 1  | ,000 | 2,588  | 1,528               | 4,384 |
|                     | VASTY2(14) | -,270  | ,322 | ,700    | 1  | ,403 | ,764   | ,406                | 1,436 |
|                     | VASTY2(15) | ,189   | ,294 | ,412    | 1  | ,521 | 1,208  | ,679                | 2,150 |
|                     | VASTY2(16) | ,361   | ,332 | 1,179   | 1  | ,278 | 1,434  | ,748                | 2,750 |
|                     | VASTY2(17) | -1,100 | ,418 | 6,919   | 1  | ,009 | ,333   | ,147                | ,755  |
|                     | VASTY2(18) | -,643  | ,376 | 2,934   | 1  | ,087 | ,525   | ,252                | 1,097 |
|                     | VASTY2(19) | -1,774 | ,555 | 10,209  | 1  | ,001 | ,170   | ,057                | ,504  |
|                     | VASTY2(20) | ,004   | ,317 | ,000    | 1  | ,991 | 1,004  | ,539                | 1,867 |
|                     | VASTY2(21) | -,089  | ,312 | ,082    | 1  | ,774 | ,914   | ,496                | 1,686 |

## Variables in the Equation

|            | B      | S.E. | Wald    | df | Sig. | Exp(B) | 95% C.I. for EXP(B) |       |
|------------|--------|------|---------|----|------|--------|---------------------|-------|
|            |        |      |         |    |      |        | Lower               | Upper |
| VASTY2(22) | ,245   | ,290 | ,713    | 1  | ,398 | 1,277  | ,724                | 2,255 |
| VASTY2(23) | ,270   | ,288 | ,877    | 1  | ,349 | 1,310  | ,744                | 2,306 |
| VASTY2(24) | ,296   | ,285 | 1,075   | 1  | ,300 | 1,344  | ,768                | 2,353 |
| VASTY2(25) | ,300   | ,302 | ,982    | 1  | ,322 | 1,349  | ,746                | 2,440 |
| VASTY2(26) | -,924  | ,419 | 4,862   | 1  | ,027 | ,397   | ,175                | ,902  |
| VASTY2(27) | -1,495 | ,468 | 10,220  | 1  | ,001 | ,224   | ,090                | ,561  |
| VASTY2(28) | -1,107 | ,477 | 5,401   | 1  | ,020 | ,330   | ,130                | ,841  |
| VASTY2(29) | -1,174 | ,413 | 8,084   | 1  | ,004 | ,309   | ,138                | ,694  |
| VASTY2(30) | -,156  | ,317 | ,242    | 1  | ,623 | ,856   | ,460                | 1,592 |
| VASTY2(31) | ,522   | ,287 | 3,313   | 1  | ,069 | 1,686  | ,961                | 2,958 |
| VASTY2(32) | -,072  | ,325 | ,050    | 1  | ,823 | ,930   | ,492                | 1,758 |
| VASTY2(33) | ,018   | ,319 | ,003    | 1  | ,956 | 1,018  | ,544                | 1,903 |
| VASTY2(34) | -1,257 | ,439 | 8,215   | 1  | ,004 | ,285   | ,120                | ,672  |
| VASTY2(35) | ,692   | ,277 | 6,254   | 1  | ,012 | 1,998  | 1,161               | 3,436 |
| weekday    |        |      | 13,104  | 6  | ,041 |        |                     |       |
| weekday(1) | -,004  | ,129 | ,001    | 1  | ,976 | ,996   | ,773                | 1,283 |
| weekday(2) | -,027  | ,130 | ,043    | 1  | ,836 | ,973   | ,754                | 1,256 |
| weekday(3) | -,040  | ,131 | ,095    | 1  | ,758 | ,961   | ,744                | 1,241 |
| weekday(4) | ,043   | ,129 | ,111    | 1  | ,739 | 1,044  | ,810                | 1,345 |
| weekday(5) | -,236  | ,140 | 2,854   | 1  | ,091 | ,790   | ,601                | 1,038 |
| weekday(6) | -,376  | ,144 | 6,879   | 1  | ,009 | ,686   | ,518                | ,909  |
| holiday(1) | -,454  | ,253 | 3,218   | 1  | ,073 | ,635   | ,387                | 1,043 |
| season     |        |      | 4,099   | 4  | ,393 |        |                     |       |
| season(1)  | -,118  | ,113 | 1,091   | 1  | ,296 | ,888   | ,711                | 1,109 |
| season(2)  | -,135  | ,106 | 1,613   | 1  | ,204 | ,874   | ,710                | 1,076 |
| season(3)  | ,059   | ,108 | ,301    | 1  | ,583 | 1,061  | ,858                | 1,312 |
| season(4)  | -,080  | ,115 | ,486    | 1  | ,486 | ,923   | ,736                | 1,156 |
| Constant   | -2,546 | ,252 | 102,291 | 1  | ,000 | ,078   |                     |       |

a. Variable(s) entered on step 1: sv5, VASTY2, weekday, holiday, season.

```

LOGISTIC REGRESSION VARIABLES luonne1t1
/METHOD=ENTER sv7 VASTY2 weekday holiday season
/CONTRAST (sv7)=Indicator(1)
/CONTRAST (VASTY2)=Indicator(1)
/CONTRAST (weekday)=Indicator(1)
/CONTRAST (holiday)=Indicator(1)
/CONTRAST (season)=Indicator(1)
/PRINT=CI(95)

```

/CRITERIA=PIN(0.05) POUT(0.10) ITERATE(20) CUT(0.5).

## Block 1: Method = Enter

### Omnibus Tests of Model Coefficients

|        |       | Chi-square | df | Sig. |
|--------|-------|------------|----|------|
| Step 1 | Step  | 336,551    | 52 | ,000 |
|        | Block | 336,551    | 52 | ,000 |
|        | Model | 336,551    | 52 | ,000 |

### Model Summary

| Step | -2 Log likelihood    | Cox & Snell R Square | Nagelkerke R Square |
|------|----------------------|----------------------|---------------------|
| 1    | 5860,32 <sup>a</sup> | ,027                 | ,068                |

a. Estimation terminated at iteration number 7 because parameter estimates changed by less than ,001.

Classification Table<sup>a</sup>

|                    |                                                   | Predicted                                                    |              |
|--------------------|---------------------------------------------------|--------------------------------------------------------------|--------------|
|                    |                                                   | luonnelt1<br>luonne<br>highest = ...                         |              |
|                    | Observed                                          | 0 ingen<br>händelse<br>eller läheltä<br>piti                 |              |
| Step 1             | luonnelt1 luonne highest = tapahtui<br>potilaalle | 0 ingen händelse eller läheltä piti<br>1 tapahtui potilaalle | 11627<br>848 |
| Overall Percentage |                                                   |                                                              |              |

Classification Table<sup>a</sup>

|                    |                                                   | Predicted                                                    |        |
|--------------------|---------------------------------------------------|--------------------------------------------------------------|--------|
|                    |                                                   | luonnelt1<br>luonne<br>highest = ...                         |        |
|                    | Observed                                          | 1 tapahtui<br>potilaalle                                     |        |
| Step 1             | luonnelt1 luonne highest = tapahtui<br>potilaalle | 0 ingen händelse eller läheltä piti<br>1 tapahtui potilaalle | 0<br>0 |
| Overall Percentage |                                                   |                                                              |        |

Classification Table<sup>a</sup>

|                    |                                                |                                                              | Predicted          |
|--------------------|------------------------------------------------|--------------------------------------------------------------|--------------------|
|                    |                                                |                                                              |                    |
| Observed           |                                                |                                                              | Percentage Correct |
| Step 1             | luonnelt1 luonne highest = tapahtui potilaalle | 0 ingen händelse eller läheltä piti<br>1 tapahtui potilaalle | 100,0<br>,0        |
| Overall Percentage |                                                |                                                              | 93,2               |

a. The cut value is ,500

Variables in the Equation

|                     |            | B      | S.E. | Wald    | df | Sig. | Exp(B) | 95% C.I. for EXP(B) |       |
|---------------------|------------|--------|------|---------|----|------|--------|---------------------|-------|
|                     |            |        |      |         |    |      |        | Lower               | Upper |
| Step 1 <sup>a</sup> | sv7        |        |      | 5,111   | 6  | ,530 |        |                     |       |
|                     | sv7(1)     | -,176  | ,153 | 1,330   | 1  | ,249 | ,838   | ,622                | 1,131 |
|                     | sv7(2)     | -,069  | ,158 | ,189    | 1  | ,663 | ,933   | ,684                | 1,273 |
|                     | sv7(3)     | -,100  | ,156 | ,408    | 1  | ,523 | ,905   | ,666                | 1,229 |
|                     | sv7(4)     | -,068  | ,147 | ,215    | 1  | ,643 | ,934   | ,701                | 1,245 |
|                     | sv7(5)     | -,032  | ,139 | ,052    | 1  | ,819 | ,969   | ,738                | 1,272 |
|                     | sv7(6)     | ,172   | ,155 | 1,227   | 1  | ,268 | 1,187  | ,876                | 1,609 |
|                     | VASTY2     |        |      | 233,612 | 35 | ,000 |        |                     |       |
|                     | VASTY2(1)  | ,073   | ,301 | ,059    | 1  | ,808 | 1,076  | ,597                | 1,940 |
|                     | VASTY2(2)  | ,473   | ,281 | 2,830   | 1  | ,093 | 1,605  | ,925                | 2,785 |
|                     | VASTY2(3)  | -1,392 | ,465 | 8,962   | 1  | ,003 | ,249   | ,100                | ,618  |
|                     | VASTY2(4)  | ,216   | ,293 | ,547    | 1  | ,459 | 1,242  | ,700                | 2,203 |
|                     | VASTY2(5)  | -,128  | ,327 | ,154    | 1  | ,695 | ,880   | ,464                | 1,668 |
|                     | VASTY2(6)  | -1,417 | ,449 | 9,952   | 1  | ,002 | ,242   | ,101                | ,585  |
|                     | VASTY2(7)  | ,652   | ,272 | 5,733   | 1  | ,017 | 1,920  | 1,126               | 3,274 |
|                     | VASTY2(8)  | -,189  | ,321 | ,345    | 1  | ,557 | ,828   | ,442                | 1,554 |
|                     | VASTY2(9)  | ,318   | ,290 | 1,196   | 1  | ,274 | 1,374  | ,778                | 2,428 |
|                     | VASTY2(10) | ,952   | ,268 | 12,619  | 1  | ,000 | 2,590  | 1,532               | 4,379 |
|                     | VASTY2(11) | ,635   | ,273 | 5,425   | 1  | ,020 | 1,887  | 1,106               | 3,220 |
|                     | VASTY2(12) | ,097   | ,298 | ,106    | 1  | ,745 | 1,102  | ,614                | 1,978 |
|                     | VASTY2(13) | ,938   | ,270 | 12,073  | 1  | ,001 | 2,554  | 1,505               | 4,335 |
|                     | VASTY2(14) | -,272  | ,322 | ,709    | 1  | ,400 | ,762   | ,405                | 1,434 |
|                     | VASTY2(15) | ,180   | ,295 | ,373    | 1  | ,541 | 1,198  | ,672                | 2,135 |
|                     | VASTY2(16) | ,357   | ,333 | 1,153   | 1  | ,283 | 1,430  | ,744                | 2,745 |
|                     | VASTY2(17) | -1,093 | ,418 | 6,818   | 1  | ,009 | ,335   | ,148                | ,761  |
|                     | VASTY2(18) | -,567  | ,379 | 2,246   | 1  | ,134 | ,567   | ,270                | 1,191 |
|                     | VASTY2(19) | -1,692 | ,558 | 9,192   | 1  | ,002 | ,184   | ,062                | ,550  |

## Variables in the Equation

|            | B      | S.E. | Wald   | df | Sig. | Exp(B) | 95% C.I. for EXP(B) |       |
|------------|--------|------|--------|----|------|--------|---------------------|-------|
|            |        |      |        |    |      |        | Lower               | Upper |
| VASTY2(20) | -,008  | ,318 | ,001   | 1  | ,981 | ,992   | ,533                | 1,849 |
| VASTY2(21) | -,084  | ,312 | ,073   | 1  | ,787 | ,919   | ,499                | 1,694 |
| VASTY2(22) | ,246   | ,290 | ,723   | 1  | ,395 | 1,280  | ,725                | 2,259 |
| VASTY2(23) | ,277   | ,288 | ,925   | 1  | ,336 | 1,320  | ,750                | 2,322 |
| VASTY2(24) | ,296   | ,286 | 1,077  | 1  | ,299 | 1,345  | ,768                | 2,354 |
| VASTY2(25) | ,309   | ,302 | 1,048  | 1  | ,306 | 1,363  | ,754                | 2,464 |
| VASTY2(26) | -,920  | ,419 | 4,824  | 1  | ,028 | ,398   | ,175                | ,906  |
| VASTY2(27) | -1,507 | ,468 | 10,356 | 1  | ,001 | ,222   | ,088                | ,555  |
| VASTY2(28) | -1,157 | ,480 | 5,805  | 1  | ,016 | ,314   | ,123                | ,806  |
| VASTY2(29) | -1,228 | ,418 | 8,647  | 1  | ,003 | ,293   | ,129                | ,664  |
| VASTY2(30) | -,147  | ,317 | ,216   | 1  | ,642 | ,863   | ,464                | 1,606 |
| VASTY2(31) | ,576   | ,288 | 4,009  | 1  | ,045 | 1,779  | 1,012               | 3,126 |
| VASTY2(32) | ,004   | ,328 | ,000   | 1  | ,991 | 1,004  | ,527                | 1,911 |
| VASTY2(33) | ,100   | ,325 | ,094   | 1  | ,759 | 1,105  | ,585                | 2,087 |
| VASTY2(34) | -1,256 | ,439 | 8,196  | 1  | ,004 | ,285   | ,121                | ,673  |
| VASTY2(35) | ,701   | ,277 | 6,408  | 1  | ,011 | 2,016  | 1,172               | 3,471 |
| weekday    |        |      | 12,752 | 6  | ,047 |        |                     |       |
| weekday(1) | -,004  | ,129 | ,001   | 1  | ,972 | ,996   | ,773                | 1,283 |
| weekday(2) | -,025  | ,130 | ,038   | 1  | ,845 | ,975   | ,755                | 1,258 |
| weekday(3) | -,039  | ,131 | ,089   | 1  | ,766 | ,962   | ,745                | 1,242 |
| weekday(4) | ,046   | ,129 | ,127   | 1  | ,721 | 1,047  | ,813                | 1,349 |
| weekday(5) | -,230  | ,140 | 2,718  | 1  | ,099 | ,794   | ,604                | 1,044 |
| weekday(6) | -,371  | ,144 | 6,677  | 1  | ,010 | ,690   | ,521                | ,914  |
| holiday(1) | -,443  | ,253 | 3,063  | 1  | ,080 | ,642   | ,391                | 1,055 |
| season     |        |      | 3,705  | 4  | ,447 |        |                     |       |
| season(1)  | -,116  | ,113 | 1,048  | 1  | ,306 | ,890   | ,713                | 1,112 |
| season(2)  | -,124  | ,106 | 1,368  | 1  | ,242 | ,883   | ,717                | 1,088 |
| season(3)  | ,058   | ,108 | ,288   | 1  | ,592 | 1,060  | ,857                | 1,311 |
| season(4)  | -,077  | ,115 | ,453   | 1  | ,501 | ,925   | ,739                | 1,160 |
| Constant   | -2,485 | ,256 | 94,351 | 1  | ,000 | ,083   |                     |       |

a. Variable(s) entered on step 1: sv7, VASTY2, weekday, holiday, season.

\*\*

```
LOGISTIC REGRESSION VARIABLES seurauslt3
/METHOD=ENTER bv1 VASTY2 weekday holiday season
/CONTRAST (bv1)=Indicator(1)
/CONTRAST (VASTY2)=Indicator(1)
```

```

1
2
3 /CONTRAST (weekday)=Indicator(1)
4 /CONTRAST (holiday)=Indicator(1)
5 /CONTRAST (season)=Indicator(1)
6 /PRINT=CI(95)
7
8 /CRITERIA=PIN(0.05) POUT(0.10) ITERATE(20) CUT(0.5).
9

```

## Block 1: Method = Enter

### Omnibus Tests of Model Coefficients

|        |       | Chi-square | df | Sig. |
|--------|-------|------------|----|------|
| Step 1 | Step  | 327,914    | 48 | ,000 |
|        | Block | 327,914    | 48 | ,000 |
|        | Model | 327,914    | 48 | ,000 |

### Model Summary

| Step | -2 Log likelihood    | Cox & Snell R Square | Nagelkerke R Square |
|------|----------------------|----------------------|---------------------|
| 1    | 3211,14 <sup>a</sup> | ,026                 | ,105                |

a. Estimation terminated at iteration number 9 because parameter estimates changed by less than ,001.

### Classification Table<sup>a</sup>

|                    |                                                    | Predicted                         |                                   |
|--------------------|----------------------------------------------------|-----------------------------------|-----------------------------------|
|                    |                                                    | seurauslt3 seuraus highest = ...  | 0 ingen händelse eller ei haittaa |
|                    | Observed                                           |                                   |                                   |
| Step 1             | seurauslt3 seuraus highest = haitta (i någon form) | 0 ingen händelse eller ei haittaa | 12075                             |
|                    |                                                    | 1 haitta (i någon form)           | 400                               |
| Overall Percentage |                                                    |                                   |                                   |

1  
2  
3  
4  
5  
6  
7  
8  
9  
10  
11  
12  
13  
14  
15  
16  
17  
18  
19  
20  
21  
22  
23  
24  
25  
26  
27  
28  
29  
30  
31  
32  
33  
34  
35  
36  
37  
38  
39  
40  
41  
42  
43  
44  
45  
46  
47  
48  
49  
50  
51  
52  
53  
54  
55  
56  
57  
58  
59  
60

**Classification Table<sup>a</sup>**

| Observed           |                                                    | Predicted                         |                         |
|--------------------|----------------------------------------------------|-----------------------------------|-------------------------|
|                    |                                                    | seurauslt3 seuraus highest = ...  | 1 haitta (i någon form) |
| Step 1             | seurauslt3 seuraus highest = haitta (i någon form) | 0 ingen händelse eller ei haittaa | 0                       |
|                    |                                                    | 1 haitta (i någon form)           | 0                       |
| Overall Percentage |                                                    |                                   |                         |

**Classification Table<sup>a</sup>**

| Observed           |                                                    | Predicted                         |       |
|--------------------|----------------------------------------------------|-----------------------------------|-------|
|                    |                                                    | Percentage Correct                |       |
| Step 1             | seurauslt3 seuraus highest = haitta (i någon form) | 0 ingen händelse eller ei haittaa | 100,0 |
|                    |                                                    | 1 haitta (i någon form)           | ,0    |
| Overall Percentage |                                                    |                                   | 96,8  |

a. The cut value is ,500

view only

## Variables in the Equation

|                     | B      | S.E.  | Wald    | df | Sig. | Exp(B) | 95% C.I. for EXP(B) |       |
|---------------------|--------|-------|---------|----|------|--------|---------------------|-------|
|                     |        |       |         |    |      |        | Lower               | Upper |
| Step 1 <sup>a</sup> |        |       |         |    |      |        |                     |       |
| bv1                 |        |       | 2,915   | 2  | ,233 |        |                     |       |
| bv1(1)              | -,164  | ,149  | 1,207   | 1  | ,272 | ,849   | ,633                | 1,137 |
| bv1(2)              | ,107   | ,121  | ,784    | 1  | ,376 | 1,113  | ,878                | 1,411 |
| VASTY2              |        |       | 227,323 | 35 | ,000 |        |                     |       |
| VASTY2(1)           | ,601   | ,424  | 2,008   | 1  | ,156 | 1,824  | ,794                | 4,188 |
| VASTY2(2)           | 1,205  | ,390  | 9,552   | 1  | ,002 | 3,337  | 1,554               | 7,166 |
| VASTY2(3)           | -1,621 | ,788  | 4,230   | 1  | ,040 | ,198   | ,042                | ,927  |
| VASTY2(4)           | ,455   | ,432  | 1,113   | 1  | ,292 | 1,577  | ,677                | 3,674 |
| VASTY2(5)           | ,451   | ,442  | 1,041   | 1  | ,308 | 1,569  | ,660                | 3,731 |
| VASTY2(6)           | -1,580 | ,787  | 4,035   | 1  | ,045 | ,206   | ,044                | ,962  |
| VASTY2(7)           | ,569   | ,426  | 1,786   | 1  | ,181 | 1,767  | ,767                | 4,069 |
| VASTY2(8)           | ,249   | ,449  | ,308    | 1  | ,579 | 1,283  | ,532                | 3,090 |
| VASTY2(9)           | 1,093  | ,398  | 7,532   | 1  | ,006 | 2,984  | 1,367               | 6,515 |
| VASTY2(10)          | 1,458  | ,381  | 14,666  | 1  | ,000 | 4,299  | 2,038               | 9,070 |
| VASTY2(11)          | 1,130  | ,393  | 8,254   | 1  | ,004 | 3,096  | 1,432               | 6,694 |
| VASTY2(12)          | ,613   | ,420  | 2,129   | 1  | ,145 | 1,847  | ,810                | 4,211 |
| VASTY2(13)          | 1,441  | ,383  | 14,149  | 1  | ,000 | 4,225  | 1,994               | 8,952 |
| VASTY2(14)          | ,158   | ,457  | ,120    | 1  | ,729 | 1,172  | ,478                | 2,872 |
| VASTY2(15)          | -1,566 | ,786  | 3,969   | 1  | ,046 | ,209   | ,045                | ,975  |
| VASTY2(16)          | -,502  | ,675  | ,554    | 1  | ,457 | ,605   | ,161                | 2,272 |
| VASTY2(17)          | -,252  | ,510  | ,244    | 1  | ,621 | ,777   | ,286                | 2,113 |
| VASTY2(18)          | -1,113 | ,672  | 2,749   | 1  | ,097 | ,328   | ,088                | 1,225 |
| VASTY2(19)          | -2,106 | 1,061 | 3,942   | 1  | ,047 | ,122   | ,015                | ,973  |
| VASTY2(20)          | ,428   | ,451  | ,902    | 1  | ,342 | 1,534  | ,634                | 3,712 |
| VASTY2(21)          | -1,553 | ,786  | 3,904   | 1  | ,048 | ,212   | ,045                | ,988  |
| VASTY2(22)          | -,777  | ,607  | 1,642   | 1  | ,200 | ,460   | ,140                | 1,509 |
| VASTY2(23)          | ,199   | ,456  | ,190    | 1  | ,663 | 1,220  | ,499                | 2,984 |
| VASTY2(24)          | -,915  | ,608  | 2,270   | 1  | ,132 | ,400   | ,122                | 1,317 |
| VASTY2(25)          | -1,333 | ,786  | 2,877   | 1  | ,090 | ,264   | ,056                | 1,231 |
| VASTY2(26)          | -2,073 | 1,058 | 3,840   | 1  | ,050 | ,126   | ,016                | 1,000 |
| VASTY2(27)          | -,897  | ,607  | 2,182   | 1  | ,140 | ,408   | ,124                | 1,341 |
| VASTY2(28)          | -,168  | ,567  | ,088    | 1  | ,767 | ,846   | ,278                | 2,569 |
| VASTY2(29)          | -,470  | ,533  | ,778    | 1  | ,378 | ,625   | ,220                | 1,777 |
| VASTY2(30)          | -,305  | ,510  | ,358    | 1  | ,550 | ,737   | ,271                | 2,004 |
| VASTY2(31)          | 1,234  | ,390  | 10,020  | 1  | ,002 | 3,437  | 1,600               | 7,380 |
| VASTY2(32)          | -,242  | ,511  | ,224    | 1  | ,636 | ,785   | ,288                | 2,138 |
| VASTY2(33)          | -,264  | ,511  | ,267    | 1  | ,605 | ,768   | ,282                | 2,090 |
| VASTY2(34)          | -1,152 | ,671  | 2,946   | 1  | ,086 | ,316   | ,085                | 1,178 |
| VASTY2(35)          | ,052   | ,482  | ,012    | 1  | ,913 | 1,054  | ,410                | 2,710 |
| weekday             |        |       | 12,250  | 6  | ,057 |        |                     |       |
| weekday(1)          | ,221   | ,185  | 1,422   | 1  | ,233 | 1,247  | ,867                | 1,794 |
| weekday(2)          | -,015  | ,195  | ,006    | 1  | ,940 | ,986   | ,673                | 1,444 |



Variables in the Equation

|            | B      | S.E. | Wald   | df | Sig. | Exp(B) | 95% C.I. for EXP(B) |       |
|------------|--------|------|--------|----|------|--------|---------------------|-------|
|            |        |      |        |    |      |        | Lower               | Upper |
| weekday(3) | ,081   | ,191 | ,178   | 1  | ,673 | 1,084  | ,745                | 1,576 |
| weekday(4) | ,240   | ,186 | 1,669  | 1  | ,196 | 1,272  | ,883                | 1,831 |
| weekday(5) | -,051  | ,200 | ,064   | 1  | ,800 | ,951   | ,643                | 1,406 |
| weekday(6) | -,400  | ,217 | 3,386  | 1  | ,066 | ,670   | ,438                | 1,026 |
| holiday(1) | -,468  | ,372 | 1,579  | 1  | ,209 | ,626   | ,302                | 1,299 |
| season     |        |      | 10,214 | 4  | ,037 |        |                     |       |
| season(1)  | -,203  | ,162 | 1,567  | 1  | ,211 | ,816   | ,594                | 1,122 |
| season(2)  | -,082  | ,146 | ,313   | 1  | ,576 | ,921   | ,692                | 1,227 |
| season(3)  | ,073   | ,151 | ,235   | 1  | ,628 | 1,076  | ,801                | 1,445 |
| season(4)  | -,482  | ,181 | 7,122  | 1  | ,008 | ,617   | ,433                | ,880  |
| Constant   | -3,548 | ,373 | 90,257 | 1  | ,000 | ,029   |                     |       |

a. Variable(s) entered on step 1: bv1, VASTY2, weekday, holiday, season.

LOGISTIC REGRESSION VARIABLES seurauslt3

/METHOD=ENTER bv2 VASTY2 weekday holiday season

/CONTRAST (bv2)=Indicator(1)

/CONTRAST (VASTY2)=Indicator(1)

/CONTRAST (weekday)=Indicator(1)

/CONTRAST (holiday)=Indicator(1)

/CONTRAST (season)=Indicator(1)

/PRINT=CI(95)

/CRITERIA=PIN(0.05) POUT(0.10) ITERATE(20) CUT(0.5).

### Block 1: Method = Enter

Omnibus Tests of Model Coefficients

|        |       | Chi-square | df | Sig. |
|--------|-------|------------|----|------|
| Step 1 | Step  | 326,097    | 48 | ,000 |
|        | Block | 326,097    | 48 | ,000 |
|        | Model | 326,097    | 48 | ,000 |

**Model Summary**

| Step | -2 Log likelihood    | Cox & Snell R Square | Nagelkerke R Square |
|------|----------------------|----------------------|---------------------|
| 1    | 3212,95 <sup>a</sup> | ,026                 | ,104                |

a. Estimation terminated at iteration number 9 because parameter estimates changed by less than ,001.

**Classification Table<sup>a</sup>**

|                    |                                                    | Predicted                         |
|--------------------|----------------------------------------------------|-----------------------------------|
|                    |                                                    | seurauslt3 seuraus highest = ...  |
| Observed           |                                                    | 0 ingen händelse eller ei haittaa |
| Step 1             | seurauslt3 seuraus highest = haitta (i någon form) | 12075                             |
|                    |                                                    | 400                               |
| Overall Percentage |                                                    |                                   |

**Classification Table<sup>a</sup>**

|                    |                                                    | Predicted                        |
|--------------------|----------------------------------------------------|----------------------------------|
|                    |                                                    | seurauslt3 seuraus highest = ... |
| Observed           |                                                    | 1 haitta (i någon form)          |
| Step 1             | seurauslt3 seuraus highest = haitta (i någon form) | 0                                |
|                    |                                                    | 0                                |
| Overall Percentage |                                                    |                                  |

**Classification Table<sup>a</sup>**

|                    |                                                    | Predicted          |
|--------------------|----------------------------------------------------|--------------------|
|                    |                                                    | Percentage Correct |
| Observed           |                                                    |                    |
| Step 1             | seurauslt3 seuraus highest = haitta (i någon form) | 100,0              |
|                    |                                                    | ,0                 |
| Overall Percentage |                                                    | 96,8               |

a. The cut value is ,500

### Variables in the Equation

|                     | B      | S.E.  | Wald    | df | Sig. | Exp(B) | 95% C.I. for EXP(B) |       |
|---------------------|--------|-------|---------|----|------|--------|---------------------|-------|
|                     |        |       |         |    |      |        | Lower               | Upper |
| Step 1 <sup>a</sup> |        |       |         |    |      |        |                     |       |
| bv2                 |        |       | 1,141   | 2  | ,565 |        |                     |       |
| bv2(1)              | ,047   | ,150  | ,100    | 1  | ,752 | 1,049  | ,781                | 1,407 |
| bv2(2)              | ,138   | ,136  | 1,025   | 1  | ,311 | 1,148  | ,879                | 1,499 |
| VASTY2              |        |       | 230,166 | 35 | ,000 |        |                     |       |
| VASTY2(1)           | ,595   | ,424  | 1,971   | 1  | ,160 | 1,814  | ,790                | 4,164 |
| VASTY2(2)           | 1,221  | ,390  | 9,800   | 1  | ,002 | 3,390  | 1,579               | 7,280 |
| VASTY2(3)           | -1,577 | ,788  | 4,009   | 1  | ,045 | ,207   | ,044                | ,967  |
| VASTY2(4)           | ,487   | ,431  | 1,274   | 1  | ,259 | 1,627  | ,699                | 3,788 |
| VASTY2(5)           | ,463   | ,442  | 1,101   | 1  | ,294 | 1,590  | ,669                | 3,779 |
| VASTY2(6)           | -1,556 | ,786  | 3,916   | 1  | ,048 | ,211   | ,045                | ,985  |
| VASTY2(7)           | ,606   | ,424  | 2,043   | 1  | ,153 | 1,834  | ,798                | 4,211 |
| VASTY2(8)           | ,272   | ,449  | ,367    | 1  | ,545 | 1,312  | ,544                | 3,163 |
| VASTY2(9)           | 1,114  | ,398  | 7,820   | 1  | ,005 | 3,047  | 1,396               | 6,652 |
| VASTY2(10)          | 1,486  | ,381  | 15,215  | 1  | ,000 | 4,418  | 2,094               | 9,322 |
| VASTY2(11)          | 1,139  | ,393  | 8,399   | 1  | ,004 | 3,125  | 1,446               | 6,753 |
| VASTY2(12)          | ,641   | ,421  | 2,326   | 1  | ,127 | 1,899  | ,833                | 4,330 |
| VASTY2(13)          | 1,482  | ,383  | 14,951  | 1  | ,000 | 4,404  | 2,077               | 9,336 |
| VASTY2(14)          | ,176   | ,457  | ,148    | 1  | ,701 | 1,192  | ,486                | 2,921 |
| VASTY2(15)          | -1,551 | ,786  | 3,892   | 1  | ,049 | ,212   | ,045                | ,990  |
| VASTY2(16)          | -,515  | ,675  | ,582    | 1  | ,445 | ,598   | ,159                | 2,242 |
| VASTY2(17)          | -,266  | ,510  | ,271    | 1  | ,602 | ,767   | ,282                | 2,084 |
| VASTY2(18)          | -1,125 | ,671  | 2,807   | 1  | ,094 | ,325   | ,087                | 1,210 |
| VASTY2(19)          | -2,212 | 1,059 | 4,364   | 1  | ,037 | ,109   | ,014                | ,872  |
| VASTY2(20)          | ,442   | ,450  | ,966    | 1  | ,326 | 1,556  | ,644                | 3,760 |
| VASTY2(21)          | -1,543 | ,786  | 3,857   | 1  | ,050 | ,214   | ,046                | ,997  |
| VASTY2(22)          | -,807  | ,607  | 1,770   | 1  | ,183 | ,446   | ,136                | 1,465 |
| VASTY2(23)          | ,190   | ,456  | ,173    | 1  | ,678 | 1,209  | ,494                | 2,956 |
| VASTY2(24)          | -,886  | ,607  | 2,127   | 1  | ,145 | ,412   | ,125                | 1,356 |
| VASTY2(25)          | -1,337 | ,786  | 2,890   | 1  | ,089 | ,263   | ,056                | 1,227 |
| VASTY2(26)          | -2,061 | 1,058 | 3,795   | 1  | ,051 | ,127   | ,016                | 1,013 |
| VASTY2(27)          | -,883  | ,607  | 2,113   | 1  | ,146 | ,414   | ,126                | 1,360 |
| VASTY2(28)          | -,137  | ,567  | ,058    | 1  | ,809 | ,872   | ,287                | 2,652 |
| VASTY2(29)          | -,448  | ,533  | ,707    | 1  | ,400 | ,639   | ,225                | 1,816 |
| VASTY2(30)          | -,289  | ,510  | ,322    | 1  | ,571 | ,749   | ,275                | 2,035 |
| VASTY2(31)          | 1,224  | ,389  | 9,888   | 1  | ,002 | 3,399  | 1,586               | 7,289 |
| VASTY2(32)          | -,272  | ,511  | ,283    | 1  | ,595 | ,762   | ,280                | 2,073 |
| VASTY2(33)          | -,282  | ,510  | ,304    | 1  | ,581 | ,755   | ,278                | 2,052 |
| VASTY2(34)          | -1,142 | ,671  | 2,894   | 1  | ,089 | ,319   | ,086                | 1,190 |
| VASTY2(35)          | ,074   | ,481  | ,024    | 1  | ,878 | 1,077  | ,420                | 2,763 |

Variables in the Equation

|            | B      | S.E. | Wald   | df | Sig. | Exp(B) | 95% C.I. for EXP(B) |       |
|------------|--------|------|--------|----|------|--------|---------------------|-------|
|            |        |      |        |    |      |        | Lower               | Upper |
| weekday    |        |      | 12,613 | 6  | ,050 |        |                     |       |
| weekday(1) | ,227   | ,185 | 1,495  | 1  | ,221 | 1,254  | ,872                | 1,803 |
| weekday(2) | -,013  | ,195 | ,005   | 1  | ,946 | ,987   | ,674                | 1,446 |
| weekday(3) | ,080   | ,191 | ,173   | 1  | ,677 | 1,083  | ,745                | 1,574 |
| weekday(4) | ,235   | ,186 | 1,591  | 1  | ,207 | 1,264  | ,878                | 1,820 |
| weekday(5) | -,063  | ,200 | ,098   | 1  | ,754 | ,939   | ,635                | 1,390 |
| weekday(6) | -,409  | ,217 | 3,534  | 1  | ,060 | ,665   | ,434                | 1,018 |
| holiday(1) | -,478  | ,373 | 1,648  | 1  | ,199 | ,620   | ,299                | 1,287 |
| season     |        |      | 10,322 | 4  | ,035 |        |                     |       |
| season(1)  | -,210  | ,162 | 1,675  | 1  | ,196 | ,811   | ,590                | 1,114 |
| season(2)  | -,107  | ,146 | ,534   | 1  | ,465 | ,899   | ,675                | 1,197 |
| season(3)  | ,067   | ,150 | ,196   | 1  | ,658 | 1,069  | ,796                | 1,435 |
| season(4)  | -,488  | ,181 | 7,301  | 1  | ,007 | ,614   | ,431                | ,875  |
| Constant   | -3,625 | ,382 | 90,231 | 1  | ,000 | ,027   |                     |       |

a. Variable(s) entered on step 1: bv2, VASTY2, weekday, holiday, season.

```
LOGISTIC REGRESSION VARIABLES seurauslt3
/METHOD=ENTER bv3 VASTY2 weekday holiday season
/CONTRAST (bv3)=Indicator(1)
/CONTRAST (VASTY2)=Indicator(1)
/CONTRAST (weekday)=Indicator(1)
/CONTRAST (holiday)=Indicator(1)
/CONTRAST (season)=Indicator(1)
/PRINT=CI(95)
/CRITERIA=PIN(0.05) POUT(0.10) ITERATE(20) CUT(0.5).
```

### Block 1: Method = Enter

Omnibus Tests of Model Coefficients

|        |       | Chi-square | df | Sig. |
|--------|-------|------------|----|------|
| Step 1 | Step  | 325,681    | 48 | ,000 |
|        | Block | 325,681    | 48 | ,000 |
|        | Model | 325,681    | 48 | ,000 |

**Model Summary**

| Step | -2 Log likelihood    | Cox & Snell R Square | Nagelkerke R Square |
|------|----------------------|----------------------|---------------------|
| 1    | 3213,37 <sup>a</sup> | ,026                 | ,104                |

a. Estimation terminated at iteration number 9 because parameter estimates changed by less than ,001.

**Classification Table<sup>a</sup>**

|                    |                                                    | Predicted<br>seurauslt3<br>seuraus<br>highest = ... |
|--------------------|----------------------------------------------------|-----------------------------------------------------|
| Observed           |                                                    | 0 ingen<br>händelse<br>eller ei<br>haittaa          |
| Step 1             | seurauslt3 seuraus highest = haitta (i någon form) | 12075<br>400                                        |
| Overall Percentage |                                                    |                                                     |

**Classification Table<sup>a</sup>**

|                    |                                                    | Predicted<br>seurauslt3<br>seuraus<br>highest = ... |
|--------------------|----------------------------------------------------|-----------------------------------------------------|
| Observed           |                                                    | 1 haitta (i någon form)                             |
| Step 1             | seurauslt3 seuraus highest = haitta (i någon form) | 0<br>0                                              |
| Overall Percentage |                                                    |                                                     |

**Classification Table<sup>a</sup>**

|                    |                                                    | Predicted          |
|--------------------|----------------------------------------------------|--------------------|
| Observed           |                                                    | Percentage Correct |
| Step 1             | seurauslt3 seuraus highest = haitta (i någon form) | 100,0<br>,0        |
| Overall Percentage |                                                    | 96,8               |

a. The cut value is ,500

**Variables in the Equation**

|                         | B      | S.E.  | Wald    | df | Sig. | Exp(B) | 95% C.I. for EXP(B) |       |
|-------------------------|--------|-------|---------|----|------|--------|---------------------|-------|
|                         |        |       |         |    |      |        | Lower               | Upper |
| Step 1 <sup>a</sup> bv3 |        |       | ,731    | 2  | ,694 |        |                     |       |
| bv3(1)                  | -,092  | ,199  | ,217    | 1  | ,642 | ,912   | ,618                | 1,346 |
| bv3(2)                  | ,098   | ,150  | ,425    | 1  | ,515 | 1,103  | ,821                | 1,481 |
| VASTY2                  |        |       | 232,872 | 35 | ,000 |        |                     |       |
| VASTY2(1)               | ,612   | ,424  | 2,082   | 1  | ,149 | 1,845  | ,803                | 4,237 |
| VASTY2(2)               | 1,227  | ,390  | 9,912   | 1  | ,002 | 3,410  | 1,589               | 7,319 |
| VASTY2(3)               | -1,569 | ,788  | 3,967   | 1  | ,046 | ,208   | ,044                | ,975  |
| VASTY2(4)               | ,493   | ,431  | 1,308   | 1  | ,253 | 1,638  | ,703                | 3,815 |
| VASTY2(5)               | ,474   | ,441  | 1,155   | 1  | ,282 | 1,607  | ,677                | 3,818 |
| VASTY2(6)               | -1,552 | ,787  | 3,889   | 1  | ,049 | ,212   | ,045                | ,990  |
| VASTY2(7)               | ,608   | ,428  | 2,019   | 1  | ,155 | 1,838  | ,794                | 4,254 |
| VASTY2(8)               | ,284   | ,448  | ,403    | 1  | ,526 | 1,329  | ,552                | 3,197 |
| VASTY2(9)               | 1,128  | ,398  | 8,050   | 1  | ,005 | 3,089  | 1,417               | 6,734 |
| VASTY2(10)              | 1,491  | ,380  | 15,384  | 1  | ,000 | 4,443  | 2,109               | 9,362 |
| VASTY2(11)              | 1,147  | ,393  | 8,514   | 1  | ,004 | 3,149  | 1,457               | 6,805 |
| VASTY2(12)              | ,651   | ,420  | 2,406   | 1  | ,121 | 1,918  | ,842                | 4,365 |
| VASTY2(13)              | 1,504  | ,381  | 15,606  | 1  | ,000 | 4,498  | 2,133               | 9,483 |
| VASTY2(14)              | ,191   | ,457  | ,175    | 1  | ,676 | 1,210  | ,495                | 2,962 |
| VASTY2(15)              | -1,536 | ,786  | 3,821   | 1  | ,051 | ,215   | ,046                | 1,004 |
| VASTY2(16)              | -,508  | ,676  | ,566    | 1  | ,452 | ,601   | ,160                | 2,262 |
| VASTY2(17)              | -,260  | ,510  | ,259    | 1  | ,610 | ,771   | ,284                | 2,096 |
| VASTY2(18)              | -1,115 | ,672  | 2,758   | 1  | ,097 | ,328   | ,088                | 1,223 |
| VASTY2(19)              | -2,166 | 1,063 | 4,150   | 1  | ,042 | ,115   | ,014                | ,921  |
| VASTY2(20)              | ,452   | ,451  | 1,005   | 1  | ,316 | 1,572  | ,649                | 3,803 |
| VASTY2(21)              | -1,533 | ,786  | 3,809   | 1  | ,051 | ,216   | ,046                | 1,007 |
| VASTY2(22)              | -,815  | ,606  | 1,808   | 1  | ,179 | ,443   | ,135                | 1,452 |
| VASTY2(23)              | ,194   | ,456  | ,181    | 1  | ,671 | 1,214  | ,496                | 2,970 |
| VASTY2(24)              | -,876  | ,607  | 2,081   | 1  | ,149 | ,416   | ,127                | 1,369 |
| VASTY2(25)              | -1,332 | ,786  | 2,870   | 1  | ,090 | ,264   | ,057                | 1,232 |
| VASTY2(26)              | -2,045 | 1,058 | 3,740   | 1  | ,053 | ,129   | ,016                | 1,028 |
| VASTY2(27)              | -,862  | ,607  | 2,020   | 1  | ,155 | ,422   | ,129                | 1,387 |
| VASTY2(28)              | -,121  | ,566  | ,045    | 1  | ,831 | ,886   | ,292                | 2,689 |
| VASTY2(29)              | -,445  | ,533  | ,698    | 1  | ,403 | ,641   | ,225                | 1,821 |
| VASTY2(30)              | -,289  | ,510  | ,322    | 1  | ,571 | ,749   | ,275                | 2,035 |
| VASTY2(31)              | 1,242  | ,392  | 10,069  | 1  | ,002 | 3,464  | 1,608               | 7,462 |
| VASTY2(32)              | -,249  | ,513  | ,235    | 1  | ,628 | ,780   | ,285                | 2,132 |
| VASTY2(33)              | -,262  | ,512  | ,262    | 1  | ,609 | ,770   | ,282                | 2,099 |
| VASTY2(34)              | -1,136 | ,671  | 2,866   | 1  | ,090 | ,321   | ,086                | 1,196 |
| VASTY2(35)              | ,084   | ,482  | ,031    | 1  | ,861 | 1,088  | ,423                | 2,800 |

Variables in the Equation

|            | B      | S.E. | Wald   | df | Sig. | Exp(B) | 95% C.I. for EXP(B) |       |
|------------|--------|------|--------|----|------|--------|---------------------|-------|
|            |        |      |        |    |      |        | Lower               | Upper |
| weekday    |        |      | 12,421 | 6  | ,053 |        |                     |       |
| weekday(1) | ,223   | ,185 | 1,455  | 1  | ,228 | 1,250  | ,870                | 1,798 |
| weekday(2) | -,019  | ,195 | ,009   | 1  | ,923 | ,981   | ,670                | 1,437 |
| weekday(3) | ,077   | ,191 | ,163   | 1  | ,686 | 1,080  | ,743                | 1,571 |
| weekday(4) | ,232   | ,186 | 1,562  | 1  | ,211 | 1,262  | ,876                | 1,816 |
| weekday(5) | -,065  | ,200 | ,107   | 1  | ,743 | ,937   | ,634                | 1,385 |
| weekday(6) | -,406  | ,218 | 3,482  | 1  | ,062 | ,666   | ,435                | 1,021 |
| holiday(1) | -,479  | ,373 | 1,657  | 1  | ,198 | ,619   | ,298                | 1,285 |
| season     |        |      | 10,360 | 4  | ,035 |        |                     |       |
| season(1)  | -,209  | ,162 | 1,666  | 1  | ,197 | ,811   | ,590                | 1,115 |
| season(2)  | -,106  | ,146 | ,527   | 1  | ,468 | ,900   | ,676                | 1,197 |
| season(3)  | ,067   | ,150 | ,200   | 1  | ,655 | 1,070  | ,796                | 1,436 |
| season(4)  | -,489  | ,181 | 7,323  | 1  | ,007 | ,613   | ,430                | ,874  |
| Constant   | -3,562 | ,371 | 92,066 | 1  | ,000 | ,028   |                     |       |

a. Variable(s) entered on step 1: bv3, VASTY2, weekday, holiday, season.

```
LOGISTIC REGRESSION VARIABLES seurauslt3
/METHOD=ENTER sv3 VASTY2 weekday holiday season
/CONTRAST (sv3)=Indicator(1)
/CONTRAST (VASTY2)=Indicator(1)
/CONTRAST (weekday)=Indicator(1)
/CONTRAST (holiday)=Indicator(1)
/CONTRAST (season)=Indicator(1)
/PRINT=CI(95)
/CRITERIA=PIN(0.05) POUT(0.10) ITERATE(20) CUT(0.5).
```

**Block 1: Method = Enter**

Omnibus Tests of Model Coefficients

|        |       | Chi-square | df | Sig. |
|--------|-------|------------|----|------|
| Step 1 | Step  | 325,661    | 48 | ,000 |
|        | Block | 325,661    | 48 | ,000 |
|        | Model | 325,661    | 48 | ,000 |

**Model Summary**

| Step | -2 Log likelihood    | Cox & Snell R Square | Nagelkerke R Square |
|------|----------------------|----------------------|---------------------|
| 1    | 3213,39 <sup>a</sup> | ,026                 | ,104                |

a. Estimation terminated at iteration number 9 because parameter estimates changed by less than ,001.

**Classification Table<sup>a</sup>**

|                    |                                                    | Predicted                         |
|--------------------|----------------------------------------------------|-----------------------------------|
|                    |                                                    | seurauslt3 seuraus highest = ...  |
| Observed           |                                                    | 0 ingen händelse eller ei haittaa |
| Step 1             | seurauslt3 seuraus highest = haitta (i någon form) | 12075                             |
|                    |                                                    | 400                               |
| Overall Percentage |                                                    |                                   |

**Classification Table<sup>a</sup>**

|                    |                                                    | Predicted                        |
|--------------------|----------------------------------------------------|----------------------------------|
|                    |                                                    | seurauslt3 seuraus highest = ... |
| Observed           |                                                    | 1 haitta (i någon form)          |
| Step 1             | seurauslt3 seuraus highest = haitta (i någon form) | 0                                |
|                    |                                                    | 0                                |
| Overall Percentage |                                                    |                                  |

**Classification Table<sup>a</sup>**

|                    |                                                    | Predicted          |
|--------------------|----------------------------------------------------|--------------------|
|                    |                                                    | Percentage Correct |
| Observed           |                                                    |                    |
| Step 1             | seurauslt3 seuraus highest = haitta (i någon form) | 100,0              |
|                    |                                                    | ,0                 |
| Overall Percentage |                                                    | 96,8               |



a. The cut value is ,500

**Variables in the Equation**

|                         | B      | S.E.  | Wald    | df | Sig. | Exp(B) | 95% C.I. for EXP(B) |       |
|-------------------------|--------|-------|---------|----|------|--------|---------------------|-------|
|                         |        |       |         |    |      |        | Lower               | Upper |
| Step 1 <sup>a</sup> sv3 |        |       | ,702    | 2  | ,704 |        |                     |       |
| sv3(1)                  | -,104  | ,157  | ,440    | 1  | ,507 | ,901   | ,663                | 1,225 |
| sv3(2)                  | ,034   | ,149  | ,051    | 1  | ,822 | 1,034  | ,772                | 1,385 |
| VASTY2                  |        |       | 221,463 | 35 | ,000 |        |                     |       |
| VASTY2(1)               | ,595   | ,425  | 1,955   | 1  | ,162 | 1,813  | ,787                | 4,172 |
| VASTY2(2)               | 1,192  | ,395  | 9,093   | 1  | ,003 | 3,295  | 1,518               | 7,153 |
| VASTY2(3)               | -1,512 | ,786  | 3,703   | 1  | ,054 | ,220   | ,047                | 1,028 |
| VASTY2(4)               | ,544   | ,429  | 1,603   | 1  | ,205 | 1,722  | ,742                | 3,995 |
| VASTY2(5)               | ,527   | ,444  | 1,412   | 1  | ,235 | 1,694  | ,710                | 4,042 |
| VASTY2(6)               | -1,570 | ,791  | 3,941   | 1  | ,047 | ,208   | ,044                | ,980  |
| VASTY2(7)               | ,681   | ,420  | 2,627   | 1  | ,105 | 1,975  | ,867                | 4,497 |
| VASTY2(8)               | ,323   | ,449  | ,518    | 1  | ,472 | 1,381  | ,573                | 3,330 |
| VASTY2(9)               | 1,145  | ,397  | 8,312   | 1  | ,004 | 3,141  | 1,443               | 6,838 |
| VASTY2(10)              | 1,455  | ,389  | 14,017  | 1  | ,000 | 4,286  | 2,001               | 9,181 |
| VASTY2(11)              | 1,158  | ,393  | 8,680   | 1  | ,003 | 3,183  | 1,473               | 6,875 |
| VASTY2(12)              | ,619   | ,425  | 2,123   | 1  | ,145 | 1,858  | ,808                | 4,273 |
| VASTY2(13)              | 1,481  | ,390  | 14,438  | 1  | ,000 | 4,397  | 2,048               | 9,440 |
| VASTY2(14)              | ,179   | ,459  | ,152    | 1  | ,697 | 1,196  | ,486                | 2,940 |
| VASTY2(15)              | -1,567 | ,789  | 3,942   | 1  | ,047 | ,209   | ,044                | ,980  |
| VASTY2(16)              | -,491  | ,675  | ,528    | 1  | ,467 | ,612   | ,163                | 2,300 |
| VASTY2(17)              | -,235  | ,511  | ,212    | 1  | ,645 | ,790   | ,290                | 2,150 |
| VASTY2(18)              | -1,027 | ,679  | 2,286   | 1  | ,131 | ,358   | ,095                | 1,356 |
| VASTY2(19)              | -2,138 | 1,062 | 4,053   | 1  | ,044 | ,118   | ,015                | ,945  |
| VASTY2(20)              | ,453   | ,452  | 1,006   | 1  | ,316 | 1,573  | ,649                | 3,812 |
| VASTY2(21)              | -1,506 | ,786  | 3,671   | 1  | ,055 | ,222   | ,048                | 1,035 |
| VASTY2(22)              | -,828  | ,606  | 1,867   | 1  | ,172 | ,437   | ,133                | 1,433 |
| VASTY2(23)              | ,202   | ,456  | ,197    | 1  | ,658 | 1,224  | ,500                | 2,995 |
| VASTY2(24)              | -,861  | ,607  | 2,013   | 1  | ,156 | ,423   | ,129                | 1,389 |
| VASTY2(25)              | -1,310 | ,787  | 2,773   | 1  | ,096 | ,270   | ,058                | 1,261 |
| VASTY2(26)              | -2,037 | 1,058 | 3,709   | 1  | ,054 | ,130   | ,016                | 1,037 |
| VASTY2(27)              | -,874  | ,609  | 2,060   | 1  | ,151 | ,417   | ,126                | 1,377 |
| VASTY2(28)              | -,157  | ,574  | ,075    | 1  | ,785 | ,855   | ,278                | 2,633 |
| VASTY2(29)              | -,487  | ,543  | ,807    | 1  | ,369 | ,614   | ,212                | 1,779 |
| VASTY2(30)              | -,242  | ,512  | ,223    | 1  | ,636 | ,785   | ,288                | 2,140 |
| VASTY2(31)              | 1,323  | ,399  | 10,991  | 1  | ,001 | 3,753  | 1,717               | 8,203 |
| VASTY2(32)              | -,177  | ,521  | ,115    | 1  | ,734 | ,838   | ,302                | 2,326 |
| VASTY2(33)              | -,187  | ,521  | ,129    | 1  | ,720 | ,830   | ,299                | 2,303 |
| VASTY2(34)              | -1,127 | ,671  | 2,818   | 1  | ,093 | ,324   | ,087                | 1,208 |
| VASTY2(35)              | ,119   | ,479  | ,061    | 1  | ,804 | 1,126  | ,440                | 2,882 |

Variables in the Equation

|            | B      | S.E. | Wald   | df | Sig. | Exp(B) | 95% C.I. for EXP(B) |       |
|------------|--------|------|--------|----|------|--------|---------------------|-------|
|            |        |      |        |    |      |        | Lower               | Upper |
| weekday    |        |      | 12,798 | 6  | ,046 |        |                     |       |
| weekday(1) | ,226   | ,185 | 1,493  | 1  | ,222 | 1,254  | ,872                | 1,803 |
| weekday(2) | -,012  | ,195 | ,004   | 1  | ,952 | ,988   | ,675                | 1,448 |
| weekday(3) | ,085   | ,191 | ,196   | 1  | ,658 | 1,088  | ,748                | 1,583 |
| weekday(4) | ,242   | ,186 | 1,693  | 1  | ,193 | 1,274  | ,885                | 1,836 |
| weekday(5) | -,060  | ,200 | ,089   | 1  | ,766 | ,942   | ,637                | 1,394 |
| weekday(6) | -,408  | ,217 | 3,525  | 1  | ,060 | ,665   | ,434                | 1,018 |
| holiday(1) | -,473  | ,373 | 1,608  | 1  | ,205 | ,623   | ,300                | 1,294 |
| season     |        |      | 10,546 | 4  | ,032 |        |                     |       |
| season(1)  | -,213  | ,162 | 1,735  | 1  | ,188 | ,808   | ,588                | 1,110 |
| season(2)  | -,108  | ,146 | ,546   | 1  | ,460 | ,898   | ,675                | 1,195 |
| season(3)  | ,068   | ,150 | ,202   | 1  | ,653 | 1,070  | ,797                | 1,437 |
| season(4)  | -,493  | ,181 | 7,436  | 1  | ,006 | ,611   | ,429                | ,871  |
| Constant   | -3,551 | ,377 | 88,742 | 1  | ,000 | ,029   |                     |       |

a. Variable(s) entered on step 1: sv3, VASTY2, weekday, holiday, season.

```
LOGISTIC REGRESSION VARIABLES seurauslt3
/METHOD=ENTER sv5 VASTY2 weekday holiday season
/CONTRAST (sv5)=Indicator(1)
/CONTRAST (VASTY2)=Indicator(1)
/CONTRAST (weekday)=Indicator(1)
/CONTRAST (holiday)=Indicator(1)
/CONTRAST (season)=Indicator(1)
/PRINT=CI(95)
/CRITERIA=PIN(0.05) POUT(0.10) ITERATE(20) CUT(0.5).
```

### Block 1: Method = Enter

Omnibus Tests of Model Coefficients

|        |       | Chi-square | df | Sig. |
|--------|-------|------------|----|------|
| Step 1 | Step  | 327,567    | 50 | ,000 |
|        | Block | 327,567    | 50 | ,000 |
|        | Model | 327,567    | 50 | ,000 |

**Model Summary**

| Step | -2 Log likelihood    | Cox & Snell R Square | Nagelkerke R Square |
|------|----------------------|----------------------|---------------------|
| 1    | 3211,48 <sup>a</sup> | ,026                 | ,105                |

a. Estimation terminated at iteration number 9 because parameter estimates changed by less than ,001.

**Classification Table<sup>a</sup>**

|                    |                                                    | Predicted                         |
|--------------------|----------------------------------------------------|-----------------------------------|
|                    |                                                    | seurauslt3 seuraus highest = ...  |
| Observed           |                                                    | 0 ingen händelse eller ei haittaa |
| Step 1             | seurauslt3 seuraus highest = haitta (i någon form) | 12075                             |
|                    |                                                    | 400                               |
| Overall Percentage |                                                    |                                   |

**Classification Table<sup>a</sup>**

|                    |                                                    | Predicted                        |
|--------------------|----------------------------------------------------|----------------------------------|
|                    |                                                    | seurauslt3 seuraus highest = ... |
| Observed           |                                                    | 1 haitta (i någon form)          |
| Step 1             | seurauslt3 seuraus highest = haitta (i någon form) | 0                                |
|                    |                                                    | 0                                |
| Overall Percentage |                                                    |                                  |

**Classification Table<sup>a</sup>**

|                    |                                                    | Predicted          |
|--------------------|----------------------------------------------------|--------------------|
|                    |                                                    | Percentage Correct |
| Observed           |                                                    |                    |
| Step 1             | seurauslt3 seuraus highest = haitta (i någon form) | 100,0              |
|                    |                                                    | ,0                 |
| Overall Percentage |                                                    | 96,8               |

a. The cut value is ,500

**Variables in the Equation**

|                         | B      | S.E.  | Wald    | df | Sig. | Exp(B) | 95% C.I. for EXP(B) |       |
|-------------------------|--------|-------|---------|----|------|--------|---------------------|-------|
|                         |        |       |         |    |      |        | Lower               | Upper |
| Step 1 <sup>a</sup> sv5 |        |       | 2,569   | 4  | ,632 |        |                     |       |
| sv5(1)                  | ,047   | ,199  | ,056    | 1  | ,813 | 1,048  | ,710                | 1,547 |
| sv5(2)                  | -,118  | ,208  | ,319    | 1  | ,572 | ,889   | ,591                | 1,337 |
| sv5(3)                  | ,103   | ,182  | ,321    | 1  | ,571 | 1,109  | ,776                | 1,583 |
| sv5(4)                  | ,214   | ,196  | 1,196   | 1  | ,274 | 1,239  | ,844                | 1,818 |
| VASTY2                  |        |       | 218,078 | 35 | ,000 |        |                     |       |
| VASTY2(1)               | ,554   | ,426  | 1,693   | 1  | ,193 | 1,739  | ,755                | 4,005 |
| VASTY2(2)               | 1,116  | ,398  | 7,852   | 1  | ,005 | 3,053  | 1,399               | 6,663 |
| VASTY2(3)               | -1,511 | ,786  | 3,699   | 1  | ,054 | ,221   | ,047                | 1,029 |
| VASTY2(4)               | ,529   | ,429  | 1,521   | 1  | ,217 | 1,698  | ,732                | 3,938 |
| VASTY2(5)               | ,514   | ,444  | 1,341   | 1  | ,247 | 1,673  | ,700                | 3,995 |
| VASTY2(6)               | -1,682 | ,795  | 4,481   | 1  | ,034 | ,186   | ,039                | ,883  |
| VASTY2(7)               | ,668   | ,420  | 2,530   | 1  | ,112 | 1,950  | ,856                | 4,441 |
| VASTY2(8)               | ,341   | ,450  | ,575    | 1  | ,448 | 1,407  | ,583                | 3,396 |
| VASTY2(9)               | 1,137  | ,397  | 8,198   | 1  | ,004 | 3,117  | 1,431               | 6,789 |
| VASTY2(10)              | 1,364  | ,393  | 12,063  | 1  | ,001 | 3,913  | 1,812               | 8,450 |
| VASTY2(11)              | 1,140  | ,393  | 8,406   | 1  | ,004 | 3,125  | 1,447               | 6,753 |
| VASTY2(12)              | ,556   | ,426  | 1,704   | 1  | ,192 | 1,744  | ,757                | 4,021 |
| VASTY2(13)              | 1,379  | ,395  | 12,219  | 1  | ,000 | 3,972  | 1,833               | 8,609 |
| VASTY2(14)              | ,121   | ,460  | ,069    | 1  | ,793 | 1,128  | ,458                | 2,781 |
| VASTY2(15)              | -1,646 | ,791  | 4,336   | 1  | ,037 | ,193   | ,041                | ,908  |
| VASTY2(16)              | -,559  | ,676  | ,683    | 1  | ,408 | ,572   | ,152                | 2,152 |
| VASTY2(17)              | -,258  | ,511  | ,256    | 1  | ,613 | ,772   | ,284                | 2,102 |
| VASTY2(18)              | -1,128 | ,684  | 2,718   | 1  | ,099 | ,324   | ,085                | 1,237 |
| VASTY2(19)              | -2,243 | 1,066 | 4,433   | 1  | ,035 | ,106   | ,013                | ,856  |
| VASTY2(20)              | ,382   | ,454  | ,709    | 1  | ,400 | 1,466  | ,602                | 3,570 |
| VASTY2(21)              | -1,529 | ,786  | 3,782   | 1  | ,052 | ,217   | ,046                | 1,012 |
| VASTY2(22)              | -,836  | ,606  | 1,903   | 1  | ,168 | ,433   | ,132                | 1,422 |
| VASTY2(23)              | ,189   | ,457  | ,171    | 1  | ,679 | 1,208  | ,494                | 2,957 |
| VASTY2(24)              | -,892  | ,607  | 2,161   | 1  | ,142 | ,410   | ,125                | 1,346 |
| VASTY2(25)              | -1,313 | ,787  | 2,780   | 1  | ,095 | ,269   | ,058                | 1,259 |
| VASTY2(26)              | -2,063 | 1,058 | 3,803   | 1  | ,051 | ,127   | ,016                | 1,010 |
| VASTY2(27)              | -,945  | ,610  | 2,395   | 1  | ,122 | ,389   | ,118                | 1,286 |
| VASTY2(28)              | -,283  | ,581  | ,237    | 1  | ,626 | ,753   | ,241                | 2,353 |
| VASTY2(29)              | -,620  | ,551  | 1,265   | 1  | ,261 | ,538   | ,183                | 1,585 |
| VASTY2(30)              | -,247  | ,512  | ,233    | 1  | ,629 | ,781   | ,286                | 2,130 |
| VASTY2(31)              | 1,248  | ,403  | 9,567   | 1  | ,002 | 3,483  | 1,579               | 7,679 |
| VASTY2(32)              | -,276  | ,527  | ,275    | 1  | ,600 | ,759   | ,270                | 2,130 |
| VASTY2(33)              | -,292  | ,528  | ,306    | 1  | ,580 | ,747   | ,265                | 2,101 |

Variables in the Equation

|            | B      | S.E. | Wald   | df | Sig. | Exp(B) | 95% C.I. for EXP(B) |       |
|------------|--------|------|--------|----|------|--------|---------------------|-------|
|            |        |      |        |    |      |        | Lower               | Upper |
| VASTY2(34) | -1,134 | ,671 | 2,855  | 1  | ,091 | ,322   | ,086                | 1,199 |
| VASTY2(35) | ,071   | ,480 | ,022   | 1  | ,882 | 1,074  | ,419                | 2,750 |
| weekday    |        |      | 13,001 | 6  | ,043 |        |                     |       |
| weekday(1) | ,227   | ,185 | 1,499  | 1  | ,221 | 1,255  | ,873                | 1,804 |
| weekday(2) | -,008  | ,195 | ,002   | 1  | ,967 | ,992   | ,677                | 1,453 |
| weekday(3) | ,086   | ,191 | ,205   | 1  | ,651 | 1,090  | ,750                | 1,586 |
| weekday(4) | ,250   | ,186 | 1,794  | 1  | ,180 | 1,284  | ,891                | 1,849 |
| weekday(5) | -,053  | ,200 | ,070   | 1  | ,791 | ,948   | ,640                | 1,404 |
| weekday(6) | -,411  | ,217 | 3,578  | 1  | ,059 | ,663   | ,433                | 1,015 |
| holiday(1) | -,476  | ,373 | 1,629  | 1  | ,202 | ,621   | ,299                | 1,290 |
| season     |        |      | 10,497 | 4  | ,033 |        |                     |       |
| season(1)  | -,209  | ,162 | 1,666  | 1  | ,197 | ,811   | ,590                | 1,115 |
| season(2)  | -,102  | ,146 | ,483   | 1  | ,487 | ,903   | ,678                | 1,204 |
| season(3)  | ,068   | ,151 | ,204   | 1  | ,651 | 1,070  | ,797                | 1,438 |
| season(4)  | -,493  | ,181 | 7,443  | 1  | ,006 | ,611   | ,429                | ,870  |
| Constant   | -3,602 | ,388 | 85,949 | 1  | ,000 | ,027   |                     |       |

a. Variable(s) entered on step 1: sv5, VASTY2, weekday, holiday, season.

```

LOGISTIC REGRESSION VARIABLES seurauslt3
/METHOD=ENTER sv7 VASTY2 weekday holiday season
/CONTRAST (sv7)=Indicator(1)
/CONTRAST (VASTY2)=Indicator(1)
/CONTRAST (weekday)=Indicator(1)
/CONTRAST (holiday)=Indicator(1)
/CONTRAST (season)=Indicator(1)
/PRINT=CI(95)
/CRITERIA=PIN(0.05) POUT(0.10) ITERATE(20) CUT(0.5).

```

## Block 1: Method = Enter

Omnibus Tests of Model Coefficients

|        |       | Chi-square | df | Sig. |
|--------|-------|------------|----|------|
| Step 1 | Step  | 328,261    | 52 | ,000 |
|        | Block | 328,261    | 52 | ,000 |
|        | Model | 328,261    | 52 | ,000 |

**Model Summary**

| Step | -2 Log likelihood    | Cox & Snell R Square | Nagelkerke R Square |
|------|----------------------|----------------------|---------------------|
| 1    | 3210,79 <sup>a</sup> | ,026                 | ,105                |

a. Estimation terminated at iteration number 9 because parameter estimates changed by less than ,001.

**Classification Table<sup>a</sup>**

|                    |                                                    | Predicted                         |
|--------------------|----------------------------------------------------|-----------------------------------|
|                    |                                                    | seurauslt3 seuraus highest = ...  |
| Observed           |                                                    | 0 ingen händelse eller ei haittaa |
| Step 1             | seurauslt3 seuraus highest = haitta (i någon form) | 12075                             |
|                    |                                                    | 400                               |
| Overall Percentage |                                                    |                                   |

**Classification Table<sup>a</sup>**

|                    |                                                    | Predicted                        |
|--------------------|----------------------------------------------------|----------------------------------|
|                    |                                                    | seurauslt3 seuraus highest = ... |
| Observed           |                                                    | 1 haitta (i någon form)          |
| Step 1             | seurauslt3 seuraus highest = haitta (i någon form) | 0                                |
|                    |                                                    | 0                                |
| Overall Percentage |                                                    |                                  |

**Classification Table<sup>a</sup>**

|                    |                                                    | Predicted          |
|--------------------|----------------------------------------------------|--------------------|
|                    |                                                    | Percentage Correct |
| Observed           |                                                    |                    |
| Step 1             | seurauslt3 seuraus highest = haitta (i någon form) | 100,0              |
|                    |                                                    | ,0                 |
| Overall Percentage |                                                    | 96,8               |

a. The cut value is ,500

### Variables in the Equation

|                     | B      | S.E.  | Wald    | df | Sig. | Exp(B) | 95% C.I. for EXP(B) |       |
|---------------------|--------|-------|---------|----|------|--------|---------------------|-------|
|                     |        |       |         |    |      |        | Lower               | Upper |
| Step 1 <sup>a</sup> |        |       | 3,282   | 6  | ,773 |        |                     |       |
| sv7                 |        |       |         |    |      |        |                     |       |
| sv7(1)              | -,065  | ,222  | ,087    | 1  | ,768 | ,937   | ,606                | 1,447 |
| sv7(2)              | -,206  | ,245  | ,712    | 1  | ,399 | ,813   | ,504                | 1,314 |
| sv7(3)              | -,013  | ,229  | ,003    | 1  | ,955 | ,987   | ,630                | 1,546 |
| sv7(4)              | ,147   | ,209  | ,489    | 1  | ,484 | 1,158  | ,768                | 1,746 |
| sv7(5)              | -,029  | ,203  | ,020    | 1  | ,887 | ,972   | ,653                | 1,445 |
| sv7(6)              | ,165   | ,223  | ,549    | 1  | ,459 | 1,179  | ,762                | 1,825 |
| VASTY2              |        |       | 221,129 | 35 | ,000 |        |                     |       |
| VASTY2(1)           | ,601   | ,426  | 1,990   | 1  | ,158 | 1,823  | ,791                | 4,201 |
| VASTY2(2)           | 1,171  | ,399  | 8,608   | 1  | ,003 | 3,224  | 1,475               | 7,049 |
| VASTY2(3)           | -1,500 | ,786  | 3,644   | 1  | ,056 | ,223   | ,048                | 1,041 |
| VASTY2(4)           | ,563   | ,430  | 1,717   | 1  | ,190 | 1,756  | ,756                | 4,076 |
| VASTY2(5)           | ,538   | ,444  | 1,467   | 1  | ,226 | 1,712  | ,717                | 4,088 |
| VASTY2(6)           | -1,644 | ,797  | 4,250   | 1  | ,039 | ,193   | ,040                | ,922  |
| VASTY2(7)           | ,672   | ,420  | 2,560   | 1  | ,110 | 1,958  | ,860                | 4,458 |
| VASTY2(8)           | ,342   | ,450  | ,576    | 1  | ,448 | 1,407  | ,583                | 3,400 |
| VASTY2(9)           | 1,153  | ,397  | 8,417   | 1  | ,004 | 3,166  | 1,453               | 6,897 |
| VASTY2(10)          | 1,423  | ,394  | 13,066  | 1  | ,000 | 4,151  | 1,919               | 8,981 |
| VASTY2(11)          | 1,164  | ,394  | 8,747   | 1  | ,003 | 3,203  | 1,481               | 6,928 |
| VASTY2(12)          | ,606   | ,426  | 2,028   | 1  | ,154 | 1,834  | ,796                | 4,224 |
| VASTY2(13)          | 1,437  | ,396  | 13,154  | 1  | ,000 | 4,206  | 1,935               | 9,142 |
| VASTY2(14)          | ,167   | ,461  | ,131    | 1  | ,718 | 1,181  | ,479                | 2,913 |
| VASTY2(15)          | -1,594 | ,791  | 4,061   | 1  | ,044 | ,203   | ,043                | ,957  |
| VASTY2(16)          | -,515  | ,677  | ,578    | 1  | ,447 | ,598   | ,159                | 2,252 |
| VASTY2(17)          | -,223  | ,511  | ,190    | 1  | ,663 | ,800   | ,294                | 2,180 |
| VASTY2(18)          | -1,040 | ,687  | 2,290   | 1  | ,130 | ,353   | ,092                | 1,359 |
| VASTY2(19)          | -2,156 | 1,069 | 4,070   | 1  | ,044 | ,116   | ,014                | ,941  |
| VASTY2(20)          | ,422   | ,455  | ,861    | 1  | ,353 | 1,525  | ,625                | 3,721 |
| VASTY2(21)          | -1,505 | ,786  | 3,667   | 1  | ,055 | ,222   | ,048                | 1,036 |
| VASTY2(22)          | -,824  | ,606  | 1,850   | 1  | ,174 | ,439   | ,134                | 1,438 |
| VASTY2(23)          | ,211   | ,457  | ,214    | 1  | ,644 | 1,235  | ,505                | 3,024 |
| VASTY2(24)          | -,871  | ,607  | 2,058   | 1  | ,151 | ,419   | ,127                | 1,376 |
| VASTY2(25)          | -1,292 | ,787  | 2,694   | 1  | ,101 | ,275   | ,059                | 1,285 |
| VASTY2(26)          | -2,045 | 1,058 | 3,739   | 1  | ,053 | ,129   | ,016                | 1,028 |
| VASTY2(27)          | -,897  | ,611  | 2,152   | 1  | ,142 | ,408   | ,123                | 1,352 |
| VASTY2(28)          | -,253  | ,587  | ,185    | 1  | ,667 | ,777   | ,246                | 2,455 |
| VASTY2(29)          | -,592  | ,558  | 1,122   | 1  | ,289 | ,553   | ,185                | 1,653 |
| VASTY2(30)          | -,223  | ,512  | ,190    | 1  | ,663 | ,800   | ,293                | 2,182 |
| VASTY2(31)          | 1,328  | ,405  | 10,762  | 1  | ,001 | 3,772  | 1,706               | 8,337 |

Variables in the Equation

|            | B      | S.E. | Wald   | df | Sig. | Exp(B) | 95% C.I. for EXP(B) |       |
|------------|--------|------|--------|----|------|--------|---------------------|-------|
|            |        |      |        |    |      |        | Lower               | Upper |
| VASTY2(32) | -,189  | ,531 | ,127   | 1  | ,722 | ,828   | ,292                | 2,344 |
| VASTY2(33) | -,204  | ,534 | ,146   | 1  | ,703 | ,816   | ,287                | 2,322 |
| VASTY2(34) | -1,123 | ,671 | 2,796  | 1  | ,094 | ,325   | ,087                | 1,213 |
| VASTY2(35) | ,114   | ,480 | ,056   | 1  | ,812 | 1,121  | ,437                | 2,872 |
| weekday    |        |      | 12,916 | 6  | ,044 |        |                     |       |
| weekday(1) | ,226   | ,185 | 1,486  | 1  | ,223 | 1,254  | ,872                | 1,803 |
| weekday(2) | -,016  | ,195 | ,006   | 1  | ,937 | ,985   | ,672                | 1,443 |
| weekday(3) | ,081   | ,191 | ,178   | 1  | ,673 | 1,084  | ,745                | 1,577 |
| weekday(4) | ,244   | ,186 | 1,712  | 1  | ,191 | 1,276  | ,886                | 1,839 |
| weekday(5) | -,059  | ,200 | ,087   | 1  | ,768 | ,943   | ,637                | 1,395 |
| weekday(6) | -,412  | ,218 | 3,586  | 1  | ,058 | ,662   | ,432                | 1,015 |
| holiday(1) | -,466  | ,373 | 1,559  | 1  | ,212 | ,628   | ,302                | 1,304 |
| season     |        |      | 10,304 | 4  | ,036 |        |                     |       |
| season(1)  | -,207  | ,162 | 1,629  | 1  | ,202 | ,813   | ,592                | 1,117 |
| season(2)  | -,096  | ,147 | ,428   | 1  | ,513 | ,909   | ,682                | 1,211 |
| season(3)  | ,067   | ,151 | ,195   | 1  | ,658 | 1,069  | ,796                | 1,436 |
| season(4)  | -,490  | ,181 | 7,340  | 1  | ,007 | ,613   | ,430                | ,873  |
| Constant   | -3,575 | ,395 | 82,069 | 1  | ,000 | ,028   |                     |       |

a. Variable(s) entered on step 1: sv7, VASTY2, weekday, holiday, season.

\*\*

```
LOGISTIC REGRESSION VARIABLES handlt1
/METHOD=ENTER bv1 VASTY2 weekday holiday season
/CONTRAST (bv1)=Indicator(1)
/CONTRAST (VASTY2)=Indicator(1)
/CONTRAST (weekday)=Indicator(1)
/CONTRAST (holiday)=Indicator(1)
/CONTRAST (season)=Indicator(1)
/PRINT=CI(95)
/CRITERIA=PIN(0.05) POUT(0.10) ITERATE(20) CUT(0.5).
```

**Block 1: Method = Enter**



## Omnibus Tests of Model Coefficients

|        |       | Chi-square | df | Sig. |
|--------|-------|------------|----|------|
| Step 1 | Step  | 230,912    | 48 | ,000 |
|        | Block | 230,912    | 48 | ,000 |
|        | Model | 230,912    | 48 | ,000 |

## Model Summary

| Step | -2 Log likelihood    | Cox & Snell R Square | Nagelkerke R Square |
|------|----------------------|----------------------|---------------------|
| 1    | 2187,87 <sup>a</sup> | ,018                 | ,104                |

a. Estimation terminated at iteration number 20 because maximum iterations has been reached. Final solution cannot be found.

Classification Table<sup>a</sup>

| Observed           |                                |                           | Predicted                 |                      |
|--------------------|--------------------------------|---------------------------|---------------------------|----------------------|
|                    |                                |                           | 0 ingen eller en händelse | 1 mer än en händelse |
| Step 1             | handlt1 händelse larger than 1 | 0 ingen eller en händelse | 12229                     | 0                    |
|                    |                                | 1 mer än en händelse      | 246                       | 0                    |
| Overall Percentage |                                |                           |                           |                      |

Classification Table<sup>a</sup>

| Observed           |                                |                           | Predicted          |
|--------------------|--------------------------------|---------------------------|--------------------|
|                    |                                |                           | Percentage Correct |
| Step 1             | handlt1 händelse larger than 1 | 0 ingen eller en händelse | 100,0              |
|                    |                                | 1 mer än en händelse      | ,0                 |
| Overall Percentage |                                |                           | 98,0               |

a. The cut value is ,500

## Variables in the Equation

|                     |            | B       | S.E.     | Wald    | df | Sig. | Exp(B) | 95% C.I. |
|---------------------|------------|---------|----------|---------|----|------|--------|----------|
|                     |            |         |          |         |    |      |        | Lower    |
| Step 1 <sup>a</sup> | bv1        |         |          | 8,711   | 2  | ,013 |        |          |
|                     | bv1(1)     | -,311   | ,191     | 2,663   | 1  | ,103 | ,732   | ,504     |
|                     | bv1(2)     | ,280    | ,154     | 3,329   | 1  | ,068 | 1,324  | ,979     |
|                     | VASTY2     |         |          | 120,646 | 35 | ,000 |        |          |
|                     | VASTY2(1)  | ,470    | ,576     | ,667    | 1  | ,414 | 1,600  | ,518     |
|                     | VASTY2(2)  | ,745    | ,545     | 1,868   | 1  | ,172 | 2,107  | ,724     |
|                     | VASTY2(3)  | -1,826  | 1,101    | 2,751   | 1  | ,097 | ,161   | ,019     |
|                     | VASTY2(4)  | ,314    | ,579     | ,295    | 1  | ,587 | 1,369  | ,440     |
|                     | VASTY2(5)  | -,507   | ,735     | ,476    | 1  | ,490 | ,602   | ,142     |
|                     | VASTY2(6)  | -17,050 | 2092,869 | ,000    | 1  | ,993 | ,000   | ,000     |
|                     | VASTY2(7)  | ,675    | ,546     | 1,529   | 1  | ,216 | 1,964  | ,674     |
|                     | VASTY2(8)  | ,241    | ,592     | ,166    | 1  | ,684 | 1,272  | ,399     |
|                     | VASTY2(9)  | ,123    | ,612     | ,040    | 1  | ,841 | 1,130  | ,340     |
|                     | VASTY2(10) | 1,492   | ,501     | 8,885   | 1  | ,003 | 4,447  | 1,667    |
|                     | VASTY2(11) | 1,428   | ,505     | 8,006   | 1  | ,005 | 4,171  | 1,551    |
|                     | VASTY2(12) | -,615   | ,735     | ,699    | 1  | ,403 | ,541   | ,128     |
|                     | VASTY2(13) | -,198   | ,641     | ,095    | 1  | ,758 | ,821   | ,234     |
|                     | VASTY2(14) | ,079    | ,612     | ,017    | 1  | ,898 | 1,082  | ,326     |
|                     | VASTY2(15) | ,099    | ,611     | ,026    | 1  | ,871 | 1,104  | ,333     |
|                     | VASTY2(16) | ,067    | ,739     | ,008    | 1  | ,928 | 1,069  | ,251     |
|                     | VASTY2(17) | -16,898 | 2088,855 | ,000    | 1  | ,994 | ,000   | ,000     |
|                     | VASTY2(18) | -16,934 | 2097,755 | ,000    | 1  | ,994 | ,000   | ,000     |
|                     | VASTY2(19) | -1,378  | 1,105    | 1,554   | 1  | ,212 | ,252   | ,029     |
|                     | VASTY2(20) | -,494   | ,737     | ,449    | 1  | ,503 | ,610   | ,144     |
|                     | VASTY2(21) | -,576   | ,735     | ,615    | 1  | ,433 | ,562   | ,133     |
|                     | VASTY2(22) | ,715    | ,565     | 1,602   | 1  | ,206 | 2,044  | ,676     |
|                     | VASTY2(23) | 1,624   | ,498     | 10,618  | 1  | ,001 | 5,072  | 1,910    |
|                     | VASTY2(24) | 1,190   | ,512     | 5,404   | 1  | ,020 | 3,288  | 1,205    |
|                     | VASTY2(25) | ,526    | ,592     | ,791    | 1  | ,374 | 1,693  | ,531     |
|                     | VASTY2(26) | -,148   | ,677     | ,048    | 1  | ,827 | ,862   | ,229     |
|                     | VASTY2(27) | -1,765  | 1,100    | 2,578   | 1  | ,108 | ,171   | ,020     |
|                     | VASTY2(28) | -1,334  | 1,100    | 1,469   | 1  | ,225 | ,263   | ,030     |
|                     | VASTY2(29) | -17,017 | 2092,198 | ,000    | 1  | ,994 | ,000   | ,000     |
|                     | VASTY2(30) | ,383    | ,576     | ,441    | 1  | ,507 | 1,466  | ,474     |
|                     | VASTY2(31) | 1,060   | ,525     | 4,081   | 1  | ,043 | 2,886  | 1,032    |
|                     | VASTY2(32) | ,022    | ,639     | ,001    | 1  | ,973 | 1,022  | ,292     |
|                     | VASTY2(33) | -,227   | ,676     | ,113    | 1  | ,737 | ,797   | ,212     |
|                     | VASTY2(34) | -1,692  | 1,098    | 2,374   | 1  | ,123 | ,184   | ,021     |
|                     | VASTY2(35) | ,910    | ,538     | 2,864   | 1  | ,091 | 2,485  | ,866     |
|                     | weekday    |         |          | 2,449   | 6  | ,874 |        |          |
|                     | weekday(1) | -,122   | ,235     | ,269    | 1  | ,604 | ,885   | ,559     |
|                     | weekday(2) | -,173   | ,238     | ,525    | 1  | ,469 | ,841   | ,527     |

Variables in the Equation

|                     |            | 95% C.I... |
|---------------------|------------|------------|
|                     |            | Upper      |
| Step 1 <sup>a</sup> | bv1        |            |
|                     | bv1(1)     | 1,065      |
|                     | bv1(2)     | 1,789      |
|                     | VASTY2     |            |
|                     | VASTY2(1)  | 4,944      |
|                     | VASTY2(2)  | 6,137      |
|                     | VASTY2(3)  | 1,393      |
|                     | VASTY2(4)  | 4,258      |
|                     | VASTY2(5)  | 2,545      |
|                     | VASTY2(6)  | .          |
|                     | VASTY2(7)  | 5,725      |
|                     | VASTY2(8)  | 4,058      |
|                     | VASTY2(9)  | 3,755      |
|                     | VASTY2(10) | 11,862     |
|                     | VASTY2(11) | 11,215     |
|                     | VASTY2(12) | 2,285      |
|                     | VASTY2(13) | 2,883      |
|                     | VASTY2(14) | 3,592      |
|                     | VASTY2(15) | 3,660      |
|                     | VASTY2(16) | 4,551      |
|                     | VASTY2(17) | .          |
|                     | VASTY2(18) | .          |
|                     | VASTY2(19) | 2,199      |
|                     | VASTY2(20) | 2,588      |
|                     | VASTY2(21) | 2,373      |
|                     | VASTY2(22) | 6,186      |
|                     | VASTY2(23) | 13,468     |
|                     | VASTY2(24) | 8,968      |
|                     | VASTY2(25) | 5,398      |
|                     | VASTY2(26) | 3,252      |
|                     | VASTY2(27) | 1,477      |
|                     | VASTY2(28) | 2,277      |
|                     | VASTY2(29) | .          |
|                     | VASTY2(30) | 4,534      |
|                     | VASTY2(31) | 8,073      |
|                     | VASTY2(32) | 3,577      |
|                     | VASTY2(33) | 3,001      |
|                     | VASTY2(34) | 1,585      |
|                     | VASTY2(35) | 7,132      |
|                     | weekday    |            |
|                     | weekday(1) | 1,403      |
|                     | weekday(2) | 1,342      |

Peer review only

Variables in the Equation

|            | B      | S.E. | Wald   | df | Sig. | Exp(B) | 95% C.I. |
|------------|--------|------|--------|----|------|--------|----------|
|            |        |      |        |    |      |        | Lower    |
| weekday(3) | ,007   | ,229 | ,001   | 1  | ,975 | 1,007  | ,643     |
| weekday(4) | -,063  | ,235 | ,071   | 1  | ,790 | ,939   | ,593     |
| weekday(5) | -,335  | ,258 | 1,695  | 1  | ,193 | ,715   | ,431     |
| weekday(6) | -,086  | ,239 | ,129   | 1  | ,720 | ,918   | ,574     |
| holiday(1) | -,796  | ,595 | 1,790  | 1  | ,181 | ,451   | ,140     |
| season     |        |      | 5,283  | 4  | ,259 |        |          |
| season(1)  | ,084   | ,198 | ,181   | 1  | ,671 | 1,088  | ,738     |
| season(2)  | -,195  | ,199 | ,952   | 1  | ,329 | ,823   | ,557     |
| season(3)  | ,245   | ,190 | 1,668  | 1  | ,197 | 1,278  | ,881     |
| season(4)  | -,100  | ,214 | ,217   | 1  | ,641 | ,905   | ,596     |
| Constant   | -4,109 | ,491 | 70,152 | 1  | ,000 | ,016   |          |

Variables in the Equation

|            | 95% C.I. |
|------------|----------|
|            | Upper    |
| weekday(3) | 1,577    |
| weekday(4) | 1,489    |
| weekday(5) | 1,185    |
| weekday(6) | 1,466    |
| holiday(1) | 1,448    |
| season     |          |
| season(1)  | 1,603    |
| season(2)  | 1,217    |
| season(3)  | 1,853    |
| season(4)  | 1,376    |
| Constant   |          |

a. Variable(s) entered on step 1: bv1, VASTY2, weekday, holiday, season.

```
LOGISTIC REGRESSION VARIABLES handlt1
/METHOD=ENTER bv2 VASTY2 weekday holiday season
/CONTRAST (bv2)=Indicator(1)
/CONTRAST (VASTY2)=Indicator(1)
/CONTRAST (weekday)=Indicator(1)
/CONTRAST (holiday)=Indicator(1)
/CONTRAST (season)=Indicator(1)
/PRINT=CI(95)
/CRITERIA=PIN(0.05) POUT(0.10) ITERATE(20) CUT(0.5).
```

**Block 1: Method = Enter**

## Omnibus Tests of Model Coefficients

|        |       | Chi-square | df | Sig. |
|--------|-------|------------|----|------|
| Step 1 | Step  | 228,418    | 48 | ,000 |
|        | Block | 228,418    | 48 | ,000 |
|        | Model | 228,418    | 48 | ,000 |

## Model Summary

| Step | -2 Log likelihood    | Cox & Snell R Square | Nagelkerke R Square |
|------|----------------------|----------------------|---------------------|
| 1    | 2190,36 <sup>a</sup> | ,018                 | ,103                |

a. Estimation terminated at iteration number 20 because maximum iterations has been reached. Final solution cannot be found.

Classification Table<sup>a</sup>

| Observed           |                                |                           | Predicted                      |                           |
|--------------------|--------------------------------|---------------------------|--------------------------------|---------------------------|
|                    |                                |                           | handlt1 händelse larger than 1 | 0 ingen eller en händelse |
| Step 1             | handlt1 händelse larger than 1 | 0 ingen eller en händelse | 12229                          | 0                         |
|                    |                                | 1 mer än en händelse      | 246                            | 0                         |
| Overall Percentage |                                |                           |                                |                           |

Classification Table<sup>a</sup>

| Observed           |                                |                           | Predicted          |
|--------------------|--------------------------------|---------------------------|--------------------|
|                    |                                |                           | Percentage Correct |
| Step 1             | handlt1 händelse larger than 1 | 0 ingen eller en händelse | 100,0              |
|                    |                                | 1 mer än en händelse      | ,0                 |
| Overall Percentage |                                |                           | 98,0               |

a. The cut value is ,500

## Variables in the Equation

|                     |            | B       | S.E.     | Wald    | df | Sig. | Exp(B) | 95% C.I. |
|---------------------|------------|---------|----------|---------|----|------|--------|----------|
|                     |            |         |          |         |    |      |        | Lower    |
| Step 1 <sup>a</sup> | bv2        |         |          | 6,307   | 2  | ,043 |        |          |
|                     | bv2(1)     | -,211   | ,190     | 1,234   | 1  | ,267 | ,810   | ,559     |
|                     | bv2(2)     | ,212    | ,171     | 1,537   | 1  | ,215 | 1,237  | ,884     |
|                     | VASTY2     |         |          | 120,890 | 35 | ,000 |        |          |
|                     | VASTY2(1)  | ,460    | ,576     | ,638    | 1  | ,424 | 1,584  | ,513     |
|                     | VASTY2(2)  | ,750    | ,545     | 1,889   | 1  | ,169 | 2,116  | ,727     |
|                     | VASTY2(3)  | -1,780  | 1,100    | 2,618   | 1  | ,106 | ,169   | ,020     |
|                     | VASTY2(4)  | ,345    | ,578     | ,356    | 1  | ,551 | 1,412  | ,455     |
|                     | VASTY2(5)  | -,502   | ,735     | ,466    | 1  | ,495 | ,605   | ,143     |
|                     | VASTY2(6)  | -17,014 | 2094,841 | ,000    | 1  | ,994 | ,000   | ,000     |
|                     | VASTY2(7)  | ,724    | ,544     | 1,775   | 1  | ,183 | 2,063  | ,711     |
|                     | VASTY2(8)  | ,244    | ,592     | ,170    | 1  | ,680 | 1,276  | ,400     |
|                     | VASTY2(9)  | ,134    | ,612     | ,048    | 1  | ,827 | 1,143  | ,344     |
|                     | VASTY2(10) | 1,501   | ,501     | 8,989   | 1  | ,003 | 4,487  | 1,682    |
|                     | VASTY2(11) | 1,443   | ,504     | 8,185   | 1  | ,004 | 4,232  | 1,575    |
|                     | VASTY2(12) | -,604   | ,735     | ,675    | 1  | ,411 | ,547   | ,129     |
|                     | VASTY2(13) | -,172   | ,641     | ,072    | 1  | ,788 | ,842   | ,240     |
|                     | VASTY2(14) | ,094    | ,612     | ,023    | 1  | ,878 | 1,098  | ,331     |
|                     | VASTY2(15) | ,099    | ,612     | ,026    | 1  | ,872 | 1,104  | ,333     |
|                     | VASTY2(16) | ,082    | ,739     | ,012    | 1  | ,912 | 1,085  | ,255     |
|                     | VASTY2(17) | -16,892 | 2090,901 | ,000    | 1  | ,994 | ,000   | ,000     |
|                     | VASTY2(18) | -16,934 | 2098,904 | ,000    | 1  | ,994 | ,000   | ,000     |
|                     | VASTY2(19) | -1,441  | 1,102    | 1,708   | 1  | ,191 | ,237   | ,027     |
|                     | VASTY2(20) | -,464   | ,737     | ,397    | 1  | ,528 | ,629   | ,148     |
|                     | VASTY2(21) | -,570   | ,735     | ,601    | 1  | ,438 | ,566   | ,134     |
|                     | VASTY2(22) | ,716    | ,565     | 1,603   | 1  | ,205 | 2,046  | ,675     |
|                     | VASTY2(23) | 1,616   | ,498     | 10,528  | 1  | ,001 | 5,034  | 1,896    |
|                     | VASTY2(24) | 1,222   | ,512     | 5,700   | 1  | ,017 | 3,393  | 1,245    |
|                     | VASTY2(25) | ,531    | ,592     | ,804    | 1  | ,370 | 1,700  | ,533     |
|                     | VASTY2(26) | -,139   | ,677     | ,042    | 1  | ,838 | ,871   | ,231     |
|                     | VASTY2(27) | -1,750  | 1,099    | 2,535   | 1  | ,111 | ,174   | ,020     |
|                     | VASTY2(28) | -1,329  | 1,101    | 1,458   | 1  | ,227 | ,265   | ,031     |
|                     | VASTY2(29) | -16,999 | 2092,769 | ,000    | 1  | ,994 | ,000   | ,000     |
|                     | VASTY2(30) | ,398    | ,576     | ,479    | 1  | ,489 | 1,490  | ,482     |
|                     | VASTY2(31) | 1,070   | ,524     | 4,177   | 1  | ,041 | 2,916  | 1,045    |
|                     | VASTY2(32) | ,017    | ,638     | ,001    | 1  | ,979 | 1,017  | ,291     |
|                     | VASTY2(33) | -,230   | ,676     | ,115    | 1  | ,734 | ,795   | ,211     |
|                     | VASTY2(34) | -1,681  | 1,098    | 2,343   | 1  | ,126 | ,186   | ,022     |
|                     | VASTY2(35) | ,954    | ,536     | 3,167   | 1  | ,075 | 2,596  | ,908     |
|                     | weekday    |         |          | 2,461   | 6  | ,873 |        |          |
|                     | weekday(1) | -,116   | ,235     | ,243    | 1  | ,622 | ,891   | ,562     |
|                     | weekday(2) | -,168   | ,238     | ,498    | 1  | ,481 | ,845   | ,530     |

Variables in the Equation

|                     |            | 95% C.I... |
|---------------------|------------|------------|
|                     |            | Upper      |
| Step 1 <sup>a</sup> | bv2        |            |
|                     | bv2(1)     | 1,175      |
|                     | bv2(2)     | 1,730      |
|                     | VASTY2     |            |
|                     | VASTY2(1)  | 4,893      |
|                     | VASTY2(2)  | 6,164      |
|                     | VASTY2(3)  | 1,457      |
|                     | VASTY2(4)  | 4,384      |
|                     | VASTY2(5)  | 2,558      |
|                     | VASTY2(6)  | .          |
|                     | VASTY2(7)  | 5,988      |
|                     | VASTY2(8)  | 4,073      |
|                     | VASTY2(9)  | 3,796      |
|                     | VASTY2(10) | 11,970     |
|                     | VASTY2(11) | 11,370     |
|                     | VASTY2(12) | 2,310      |
|                     | VASTY2(13) | 2,956      |
|                     | VASTY2(14) | 3,644      |
|                     | VASTY2(15) | 3,660      |
|                     | VASTY2(16) | 4,616      |
|                     | VASTY2(17) | .          |
|                     | VASTY2(18) | .          |
|                     | VASTY2(19) | 2,055      |
|                     | VASTY2(20) | 2,663      |
|                     | VASTY2(21) | 2,388      |
|                     | VASTY2(22) | 6,198      |
|                     | VASTY2(23) | 13,362     |
|                     | VASTY2(24) | 9,249      |
|                     | VASTY2(25) | 5,421      |
|                     | VASTY2(26) | 3,282      |
|                     | VASTY2(27) | 1,498      |
|                     | VASTY2(28) | 2,289      |
|                     | VASTY2(29) | .          |
|                     | VASTY2(30) | 4,606      |
|                     | VASTY2(31) | 8,140      |
|                     | VASTY2(32) | 3,553      |
|                     | VASTY2(33) | 2,989      |
|                     | VASTY2(34) | 1,602      |
|                     | VASTY2(35) | 7,423      |
|                     | weekday    |            |
|                     | weekday(1) | 1,411      |
|                     | weekday(2) | 1,348      |

Peer review only

Variables in the Equation

|            | B      | S.E. | Wald   | df | Sig. | Exp(B) | 95% C.I. |
|------------|--------|------|--------|----|------|--------|----------|
|            |        |      |        |    |      |        | Lower    |
| weekday(3) | ,010   | ,229 | ,002   | 1  | ,967 | 1,010  | ,645     |
| weekday(4) | -,070  | ,235 | ,089   | 1  | ,766 | ,932   | ,588     |
| weekday(5) | -,339  | ,258 | 1,729  | 1  | ,188 | ,712   | ,430     |
| weekday(6) | -,088  | ,239 | ,136   | 1  | ,712 | ,916   | ,573     |
| holiday(1) | -,795  | ,595 | 1,784  | 1  | ,182 | ,451   | ,141     |
| season     |        |      | 5,407  | 4  | ,248 |        |          |
| season(1)  | ,079   | ,198 | ,158   | 1  | ,691 | 1,082  | ,734     |
| season(2)  | -,209  | ,199 | 1,104  | 1  | ,293 | ,811   | ,549     |
| season(3)  | ,238   | ,190 | 1,573  | 1  | ,210 | 1,268  | ,875     |
| season(4)  | -,105  | ,214 | ,242   | 1  | ,623 | ,900   | ,592     |
| Constant   | -4,117 | ,499 | 68,130 | 1  | ,000 | ,016   |          |

Variables in the Equation

|            | 95% C.I. |
|------------|----------|
|            | Upper    |
| weekday(3) | 1,581    |
| weekday(4) | 1,477    |
| weekday(5) | 1,181    |
| weekday(6) | 1,463    |
| holiday(1) | 1,450    |
| season     |          |
| season(1)  | 1,594    |
| season(2)  | 1,199    |
| season(3)  | 1,839    |
| season(4)  | 1,368    |
| Constant   |          |

a. Variable(s) entered on step 1: bv2, VASTY2, weekday, holiday, season.

```
LOGISTIC REGRESSION VARIABLES handlt1
/METHOD=ENTER bv3 VASTY2 weekday holiday season
/CONTRAST (bv3)=Indicator(1)
/CONTRAST (VASTY2)=Indicator(1)
/CONTRAST (weekday)=Indicator(1)
/CONTRAST (holiday)=Indicator(1)
/CONTRAST (season)=Indicator(1)
/PRINT=CI(95)
/CRITERIA=PIN(0.05) POUT(0.10) ITERATE(20) CUT(0.5).
```

**Block 1: Method = Enter**



**Omnibus Tests of Model Coefficients**

|        |       | Chi-square | df | Sig. |
|--------|-------|------------|----|------|
| Step 1 | Step  | 224,832    | 48 | ,000 |
|        | Block | 224,832    | 48 | ,000 |
|        | Model | 224,832    | 48 | ,000 |

**Model Summary**

| Step | -2 Log likelihood    | Cox & Snell R Square | Nagelkerke R Square |
|------|----------------------|----------------------|---------------------|
| 1    | 2193,95 <sup>a</sup> | ,018                 | ,101                |

a. Estimation terminated at iteration number 20 because maximum iterations has been reached. Final solution cannot be found.

**Classification Table<sup>a</sup>**

| Observed           |                                |                           | Predicted                      |                           |
|--------------------|--------------------------------|---------------------------|--------------------------------|---------------------------|
|                    |                                |                           | handlt1 händelse larger than 1 | 0 ingen eller en händelse |
| Step 1             | handlt1 händelse larger than 1 | 0 ingen eller en händelse | 12229                          | 0                         |
|                    |                                | 1 mer än en händelse      | 246                            | 0                         |
| Overall Percentage |                                |                           |                                |                           |

**Classification Table<sup>a</sup>**

| Observed           |                                |                           | Predicted          |
|--------------------|--------------------------------|---------------------------|--------------------|
|                    |                                |                           | Percentage Correct |
| Step 1             | handlt1 händelse larger than 1 | 0 ingen eller en händelse | 100,0              |
|                    |                                | 1 mer än en händelse      | ,0                 |
| Overall Percentage |                                |                           | 98,0               |

a. The cut value is ,500

## Variables in the Equation

|                     |            | B       | S.E.     | Wald    | df | Sig. | Exp(B) | 95% C.I. |
|---------------------|------------|---------|----------|---------|----|------|--------|----------|
|                     |            |         |          |         |    |      |        | Lower    |
| Step 1 <sup>a</sup> | bv3        |         |          | 2,604   | 2  | ,272 |        |          |
|                     | bv3(1)     | -,422   | ,262     | 2,592   | 1  | ,107 | ,656   | ,393     |
|                     | bv3(2)     | -,054   | ,196     | ,075    | 1  | ,784 | ,948   | ,645     |
|                     | VASTY2     |         |          | 118,563 | 35 | ,000 |        |          |
|                     | VASTY2(1)  | ,519    | ,576     | ,811    | 1  | ,368 | 1,680  | ,544     |
|                     | VASTY2(2)  | ,795    | ,545     | 2,127   | 1  | ,145 | 2,214  | ,761     |
|                     | VASTY2(3)  | -1,630  | 1,100    | 2,197   | 1  | ,138 | ,196   | ,023     |
|                     | VASTY2(4)  | ,475    | ,578     | ,676    | 1  | ,411 | 1,609  | ,518     |
|                     | VASTY2(5)  | -,430   | ,735     | ,342    | 1  | ,559 | ,651   | ,154     |
|                     | VASTY2(6)  | -16,906 | 2096,940 | ,000    | 1  | ,994 | ,000   | ,000     |
|                     | VASTY2(7)  | ,916    | ,549     | 2,786   | 1  | ,095 | 2,500  | ,852     |
|                     | VASTY2(8)  | ,331    | ,591     | ,314    | 1  | ,575 | 1,393  | ,437     |
|                     | VASTY2(9)  | ,237    | ,611     | ,151    | 1  | ,698 | 1,268  | ,383     |
|                     | VASTY2(10) | 1,560   | ,500     | 9,739   | 1  | ,002 | 4,757  | 1,786    |
|                     | VASTY2(11) | 1,495   | ,504     | 8,801   | 1  | ,003 | 4,461  | 1,661    |
|                     | VASTY2(12) | -,533   | ,734     | ,526    | 1  | ,468 | ,587   | ,139     |
|                     | VASTY2(13) | -,017   | ,638     | ,001    | 1  | ,978 | ,983   | ,281     |
|                     | VASTY2(14) | ,186    | ,611     | ,093    | 1  | ,761 | 1,204  | ,364     |
|                     | VASTY2(15) | ,176    | ,611     | ,083    | 1  | ,774 | 1,192  | ,360     |
|                     | VASTY2(16) | ,157    | ,740     | ,045    | 1  | ,832 | 1,170  | ,274     |
|                     | VASTY2(17) | -16,892 | 2092,116 | ,000    | 1  | ,994 | ,000   | ,000     |
|                     | VASTY2(18) | -16,881 | 2100,924 | ,000    | 1  | ,994 | ,000   | ,000     |
|                     | VASTY2(19) | -1,387  | 1,107    | 1,570   | 1  | ,210 | ,250   | ,029     |
|                     | VASTY2(20) | -,351   | ,737     | ,227    | 1  | ,634 | ,704   | ,166     |
|                     | VASTY2(21) | -,516   | ,734     | ,493    | 1  | ,483 | ,597   | ,142     |
|                     | VASTY2(22) | ,636    | ,563     | 1,272   | 1  | ,259 | 1,888  | ,626     |
|                     | VASTY2(23) | 1,627   | ,498     | 10,668  | 1  | ,001 | 5,089  | 1,917    |
|                     | VASTY2(24) | 1,337   | ,511     | 6,841   | 1  | ,009 | 3,809  | 1,398    |
|                     | VASTY2(25) | ,544    | ,592     | ,844    | 1  | ,358 | 1,722  | ,540     |
|                     | VASTY2(26) | -,046   | ,677     | ,005    | 1  | ,945 | ,955   | ,253     |
|                     | VASTY2(27) | -1,633  | 1,099    | 2,210   | 1  | ,137 | ,195   | ,023     |
|                     | VASTY2(28) | -1,230  | 1,100    | 1,252   | 1  | ,263 | ,292   | ,034     |
|                     | VASTY2(29) | -16,968 | 2095,762 | ,000    | 1  | ,994 | ,000   | ,000     |
|                     | VASTY2(30) | ,434    | ,576     | ,567    | 1  | ,451 | 1,543  | ,499     |
|                     | VASTY2(31) | 1,180   | ,526     | 5,037   | 1  | ,025 | 3,255  | 1,161    |
|                     | VASTY2(32) | ,100    | ,641     | ,024    | 1  | ,876 | 1,105  | ,315     |
|                     | VASTY2(33) | -,155   | ,677     | ,052    | 1  | ,819 | ,856   | ,227     |
|                     | VASTY2(34) | -1,651  | 1,098    | 2,261   | 1  | ,133 | ,192   | ,022     |
|                     | VASTY2(35) | 1,097   | ,538     | 4,159   | 1  | ,041 | 2,995  | 1,044    |
|                     | weekday    |         |          | 2,959   | 6  | ,814 |        |          |
|                     | weekday(1) | -,126   | ,235     | ,289    | 1  | ,591 | ,882   | ,557     |
|                     | weekday(2) | -,186   | ,238     | ,609    | 1  | ,435 | ,830   | ,521     |

Variables in the Equation

|                     |            | 95% C.I... |
|---------------------|------------|------------|
|                     |            | Upper      |
| Step 1 <sup>a</sup> | bv3        |            |
|                     | bv3(1)     | 1,096      |
|                     | bv3(2)     | 1,392      |
|                     | VASTY2     |            |
|                     | VASTY2(1)  | 5,190      |
|                     | VASTY2(2)  | 6,442      |
|                     | VASTY2(3)  | 1,692      |
|                     | VASTY2(4)  | 4,995      |
|                     | VASTY2(5)  | 2,747      |
|                     | VASTY2(6)  | .          |
|                     | VASTY2(7)  | 7,331      |
|                     | VASTY2(8)  | 4,434      |
|                     | VASTY2(9)  | 4,201      |
|                     | VASTY2(10) | 12,668     |
|                     | VASTY2(11) | 11,982     |
|                     | VASTY2(12) | 2,476      |
|                     | VASTY2(13) | 3,435      |
|                     | VASTY2(14) | 3,988      |
|                     | VASTY2(15) | 3,944      |
|                     | VASTY2(16) | 4,988      |
|                     | VASTY2(17) | .          |
|                     | VASTY2(18) | .          |
|                     | VASTY2(19) | 2,187      |
|                     | VASTY2(20) | 2,984      |
|                     | VASTY2(21) | 2,519      |
|                     | VASTY2(22) | 5,697      |
|                     | VASTY2(23) | 13,512     |
|                     | VASTY2(24) | 10,374     |
|                     | VASTY2(25) | 5,495      |
|                     | VASTY2(26) | 3,595      |
|                     | VASTY2(27) | 1,682      |
|                     | VASTY2(28) | 2,522      |
|                     | VASTY2(29) | .          |
|                     | VASTY2(30) | 4,768      |
|                     | VASTY2(31) | 9,126      |
|                     | VASTY2(32) | 3,883      |
|                     | VASTY2(33) | 3,230      |
|                     | VASTY2(34) | 1,651      |
|                     | VASTY2(35) | 8,595      |
|                     | weekday    |            |
|                     | weekday(1) | 1,396      |
|                     | weekday(2) | 1,324      |

Peer review only

Variables in the Equation

|            | B      | S.E. | Wald   | df | Sig. | Exp(B) | 95% C.I. |
|------------|--------|------|--------|----|------|--------|----------|
|            |        |      |        |    |      |        | Lower    |
| weekday(3) | -,007  | ,229 | ,001   | 1  | ,976 | ,993   | ,634     |
| weekday(4) | -,091  | ,235 | ,151   | 1  | ,697 | ,913   | ,576     |
| weekday(5) | -,384  | ,257 | 2,234  | 1  | ,135 | ,681   | ,412     |
| weekday(6) | -,110  | ,239 | ,211   | 1  | ,646 | ,896   | ,561     |
| holiday(1) | -,802  | ,595 | 1,815  | 1  | ,178 | ,448   | ,140     |
| season     |        |      | 5,945  | 4  | ,203 |        |          |
| season(1)  | ,060   | ,198 | ,091   | 1  | ,763 | 1,061  | ,720     |
| season(2)  | -,258  | ,199 | 1,681  | 1  | ,195 | ,773   | ,523     |
| season(3)  | ,219   | ,189 | 1,334  | 1  | ,248 | 1,245  | ,859     |
| season(4)  | -,113  | ,213 | ,278   | 1  | ,598 | ,894   | ,588     |
| Constant   | -4,072 | ,487 | 69,792 | 1  | ,000 | ,017   |          |

Variables in the Equation

|            | 95% C.I. |
|------------|----------|
|            | Upper    |
| weekday(3) | 1,555    |
| weekday(4) | 1,446    |
| weekday(5) | 1,127    |
| weekday(6) | 1,431    |
| holiday(1) | 1,440    |
| season     |          |
| season(1)  | 1,564    |
| season(2)  | 1,141    |
| season(3)  | 1,804    |
| season(4)  | 1,358    |
| Constant   |          |

a. Variable(s) entered on step 1: bv3, VASTY2, weekday, holiday, season.

```
LOGISTIC REGRESSION VARIABLES handlt1
/METHOD=ENTER sv3 VASTY2 weekday holiday season
/CONTRAST (sv3)=Indicator(1)
/CONTRAST (VASTY2)=Indicator(1)
/CONTRAST (weekday)=Indicator(1)
/CONTRAST (holiday)=Indicator(1)
/CONTRAST (season)=Indicator(1)
/PRINT=CI(95)
/CRITERIA=PIN(0.05) POUT(0.10) ITERATE(20) CUT(0.5).
```

**Block 1: Method = Enter**

1  
2  
3  
4  
5  
6  
7  
8  
9  
10  
11  
12  
13

### Omnibus Tests of Model Coefficients

|        |       | Chi-square | df | Sig. |
|--------|-------|------------|----|------|
| Step 1 | Step  | 222,666    | 48 | ,000 |
|        | Block | 222,666    | 48 | ,000 |
|        | Model | 222,666    | 48 | ,000 |

14  
15  
16  
17  
18  
19  
20  
21  
22  
23  
24  
25

### Model Summary

| Step | -2 Log likelihood    | Cox & Snell R Square | Nagelkerke R Square |
|------|----------------------|----------------------|---------------------|
| 1    | 2196,12 <sup>a</sup> | ,018                 | ,100                |

a. Estimation terminated at iteration number 20 because maximum iterations has been reached. Final solution cannot be found.

26  
27  
28  
29  
30  
31  
32  
33  
34  
35  
36  
37  
38

### Classification Table<sup>a</sup>

| Observed           |                                |                           | Predicted                 |                      |
|--------------------|--------------------------------|---------------------------|---------------------------|----------------------|
|                    |                                |                           | 0 ingen eller en händelse | 1 mer än en händelse |
| Step 1             | handlt1 händelse larger than 1 | 0 ingen eller en händelse | 12229                     | 0                    |
|                    |                                | 1 mer än en händelse      | 246                       | 0                    |
| Overall Percentage |                                |                           |                           |                      |

39  
40  
41  
42  
43  
44  
45  
46  
47  
48  
49  
50  
51  
52  
53  
54  
55  
56  
57  
58  
59  
60

### Classification Table<sup>a</sup>

| Observed           |                                |                           | Predicted          |
|--------------------|--------------------------------|---------------------------|--------------------|
|                    |                                |                           | Percentage Correct |
| Step 1             | handlt1 händelse larger than 1 | 0 ingen eller en händelse | 100,0              |
|                    |                                | 1 mer än en händelse      | ,0                 |
| Overall Percentage |                                |                           | 98,0               |

a. The cut value is ,500

## Variables in the Equation

|                     |            | B       | S.E.     | Wald    | df | Sig. | Exp(B) | 95% C.I. |
|---------------------|------------|---------|----------|---------|----|------|--------|----------|
|                     |            |         |          |         |    |      |        | Lower    |
| Step 1 <sup>a</sup> | sv3        |         |          | ,684    | 2  | ,710 |        |          |
|                     | sv3(1)     | ,011    | ,182     | ,003    | 1  | ,954 | 1,011  | ,707     |
|                     | sv3(2)     | ,140    | ,181     | ,603    | 1  | ,438 | 1,151  | ,807     |
|                     | VASTY2     |         |          | 118,820 | 35 | ,000 |        |          |
|                     | VASTY2(1)  | ,451    | ,577     | ,611    | 1  | ,435 | 1,570  | ,507     |
|                     | VASTY2(2)  | ,737    | ,551     | 1,786   | 1  | ,181 | 2,089  | ,709     |
|                     | VASTY2(3)  | -1,605  | 1,098    | 2,134   | 1  | ,144 | ,201   | ,023     |
|                     | VASTY2(4)  | ,480    | ,576     | ,695    | 1  | ,404 | 1,616  | ,523     |
|                     | VASTY2(5)  | -,412   | ,737     | ,312    | 1  | ,577 | ,663   | ,156     |
|                     | VASTY2(6)  | -17,006 | 2097,861 | ,000    | 1  | ,994 | ,000   | ,000     |
|                     | VASTY2(7)  | ,915    | ,538     | 2,893   | 1  | ,089 | 2,498  | ,870     |
|                     | VASTY2(8)  | ,369    | ,592     | ,389    | 1  | ,533 | 1,447  | ,453     |
|                     | VASTY2(9)  | ,237    | ,611     | ,151    | 1  | ,698 | 1,268  | ,383     |
|                     | VASTY2(10) | 1,500   | ,509     | 8,699   | 1  | ,003 | 4,484  | 1,654    |
|                     | VASTY2(11) | 1,480   | ,504     | 8,629   | 1  | ,003 | 4,392  | 1,636    |
|                     | VASTY2(12) | -,583   | ,739     | ,622    | 1  | ,430 | ,558   | ,131     |
|                     | VASTY2(13) | -,088   | ,646     | ,019    | 1  | ,891 | ,916   | ,258     |
|                     | VASTY2(14) | ,137    | ,613     | ,050    | 1  | ,824 | 1,146  | ,345     |
|                     | VASTY2(15) | ,112    | ,617     | ,033    | 1  | ,856 | 1,118  | ,334     |
|                     | VASTY2(16) | ,073    | ,739     | ,010    | 1  | ,921 | 1,076  | ,253     |
|                     | VASTY2(17) | -16,912 | 2094,856 | ,000    | 1  | ,994 | ,000   | ,000     |
|                     | VASTY2(18) | -16,890 | 2103,933 | ,000    | 1  | ,994 | ,000   | ,000     |
|                     | VASTY2(19) | -1,592  | 1,105    | 2,076   | 1  | ,150 | ,204   | ,023     |
|                     | VASTY2(20) | -,423   | ,737     | ,329    | 1  | ,566 | ,655   | ,154     |
|                     | VASTY2(21) | -,501   | ,735     | ,466    | 1  | ,495 | ,606   | ,143     |
|                     | VASTY2(22) | ,597    | ,563     | 1,122   | 1  | ,289 | 1,816  | ,602     |
|                     | VASTY2(23) | 1,605   | ,498     | 10,374  | 1  | ,001 | 4,978  | 1,874    |
|                     | VASTY2(24) | 1,318   | ,510     | 6,681   | 1  | ,010 | 3,736  | 1,375    |
|                     | VASTY2(25) | ,531    | ,593     | ,802    | 1  | ,370 | 1,701  | ,532     |
|                     | VASTY2(26) | -,078   | ,676     | ,013    | 1  | ,909 | ,925   | ,246     |
|                     | VASTY2(27) | -1,707  | 1,100    | 2,406   | 1  | ,121 | ,181   | ,021     |
|                     | VASTY2(28) | -1,304  | 1,105    | 1,393   | 1  | ,238 | ,271   | ,031     |
|                     | VASTY2(29) | -17,049 | 2095,904 | ,000    | 1  | ,994 | ,000   | ,000     |
|                     | VASTY2(30) | ,466    | ,577     | ,652    | 1  | ,419 | 1,594  | ,514     |
|                     | VASTY2(31) | 1,126   | ,533     | 4,461   | 1  | ,035 | 3,084  | 1,085    |
|                     | VASTY2(32) | ,012    | ,649     | ,000    | 1  | ,985 | 1,013  | ,284     |
|                     | VASTY2(33) | -,218   | ,686     | ,100    | 1  | ,751 | ,804   | ,210     |
|                     | VASTY2(34) | -1,649  | 1,098    | 2,254   | 1  | ,133 | ,192   | ,022     |
|                     | VASTY2(35) | 1,051   | ,534     | 3,880   | 1  | ,049 | 2,861  | 1,005    |
|                     | weekday    |         |          | 3,005   | 6  | ,808 |        |          |
|                     | weekday(1) | -,114   | ,235     | ,237    | 1  | ,626 | ,892   | ,563     |
|                     | weekday(2) | -,175   | ,238     | ,537    | 1  | ,464 | ,840   | ,527     |

## Variables in the Equation

|                     |            | 95% C.I... |
|---------------------|------------|------------|
|                     |            | Upper      |
| Step 1 <sup>a</sup> | sv3        |            |
|                     | sv3(1)     | 1,444      |
|                     | sv3(2)     | 1,640      |
|                     | VASTY2     |            |
|                     | VASTY2(1)  | 4,863      |
|                     | VASTY2(2)  | 6,155      |
|                     | VASTY2(3)  | 1,730      |
|                     | VASTY2(4)  | 4,997      |
|                     | VASTY2(5)  | 2,810      |
|                     | VASTY2(6)  | .          |
|                     | VASTY2(7)  | 7,172      |
|                     | VASTY2(8)  | 4,617      |
|                     | VASTY2(9)  | 4,196      |
|                     | VASTY2(10) | 12,153     |
|                     | VASTY2(11) | 11,789     |
|                     | VASTY2(12) | 2,376      |
|                     | VASTY2(13) | 3,247      |
|                     | VASTY2(14) | 3,814      |
|                     | VASTY2(15) | 3,746      |
|                     | VASTY2(16) | 4,578      |
|                     | VASTY2(17) | .          |
|                     | VASTY2(18) | .          |
|                     | VASTY2(19) | 1,775      |
|                     | VASTY2(20) | 2,779      |
|                     | VASTY2(21) | 2,557      |
|                     | VASTY2(22) | 5,475      |
|                     | VASTY2(23) | 13,219     |
|                     | VASTY2(24) | 10,148     |
|                     | VASTY2(25) | 5,439      |
|                     | VASTY2(26) | 3,483      |
|                     | VASTY2(27) | 1,568      |
|                     | VASTY2(28) | 2,367      |
|                     | VASTY2(29) | .          |
|                     | VASTY2(30) | 4,941      |
|                     | VASTY2(31) | 8,770      |
|                     | VASTY2(32) | 3,612      |
|                     | VASTY2(33) | 3,088      |
|                     | VASTY2(34) | 1,655      |
|                     | VASTY2(35) | 8,145      |
|                     | weekday    |            |
|                     | weekday(1) | 1,413      |
|                     | weekday(2) | 1,339      |

Variables in the Equation

|            | B      | S.E. | Wald   | df | Sig. | Exp(B) | 95% C.I. |
|------------|--------|------|--------|----|------|--------|----------|
|            |        |      |        |    |      |        | Lower    |
| weekday(3) | ,004   | ,229 | ,000   | 1  | ,985 | 1,004  | ,641     |
| weekday(4) | -,079  | ,235 | ,113   | 1  | ,737 | ,924   | ,582     |
| weekday(5) | -,383  | ,258 | 2,212  | 1  | ,137 | ,682   | ,411     |
| weekday(6) | -,125  | ,239 | ,273   | 1  | ,602 | ,883   | ,553     |
| holiday(1) | -,822  | ,596 | 1,906  | 1  | ,167 | ,439   | ,137     |
| season     |        |      | 6,179  | 4  | ,186 |        |          |
| season(1)  | ,059   | ,197 | ,089   | 1  | ,765 | 1,061  | ,720     |
| season(2)  | -,265  | ,199 | 1,767  | 1  | ,184 | ,767   | ,520     |
| season(3)  | ,220   | ,190 | 1,344  | 1  | ,246 | 1,246  | ,859     |
| season(4)  | -,121  | ,213 | ,322   | 1  | ,570 | ,886   | ,583     |
| Constant   | -4,145 | ,495 | 70,173 | 1  | ,000 | ,016   |          |

Variables in the Equation

|            | 95% C.I. |
|------------|----------|
|            | Upper    |
| weekday(3) | 1,573    |
| weekday(4) | 1,466    |
| weekday(5) | 1,130    |
| weekday(6) | 1,410    |
| holiday(1) | 1,412    |
| season     |          |
| season(1)  | 1,562    |
| season(2)  | 1,134    |
| season(3)  | 1,806    |
| season(4)  | 1,346    |
| Constant   |          |

a. Variable(s) entered on step 1: sv3, VASTY2, weekday, holiday, season.

```
LOGISTIC REGRESSION VARIABLES handlt1
/METHOD=ENTER sv5 VASTY2 weekday holiday season
/CONTRAST (sv5)=Indicator(1)
/CONTRAST (VASTY2)=Indicator(1)
/CONTRAST (weekday)=Indicator(1)
/CONTRAST (holiday)=Indicator(1)
/CONTRAST (season)=Indicator(1)
/PRINT=CI(95)
/CRITERIA=PIN(0.05) POUT(0.10) ITERATE(20) CUT(0.5).
```

**Block 1: Method = Enter**



1  
2  
3  
4  
5  
6  
7  
8  
9  
10  
11  
12  
13

### Omnibus Tests of Model Coefficients

|        |       | Chi-square | df | Sig. |
|--------|-------|------------|----|------|
| Step 1 | Step  | 224,307    | 50 | ,000 |
|        | Block | 224,307    | 50 | ,000 |
|        | Model | 224,307    | 50 | ,000 |

14  
15  
16  
17  
18  
19  
20  
21  
22  
23  
24  
25

### Model Summary

| Step | -2 Log likelihood    | Cox & Snell R Square | Nagelkerke R Square |
|------|----------------------|----------------------|---------------------|
| 1    | 2194,48 <sup>a</sup> | ,018                 | ,101                |

a. Estimation terminated at iteration number 20 because maximum iterations has been reached. Final solution cannot be found.

26  
27  
28  
29  
30  
31  
32  
33  
34  
35  
36  
37  
38

### Classification Table<sup>a</sup>

| Observed           |                                |                           | Predicted                      |                           |
|--------------------|--------------------------------|---------------------------|--------------------------------|---------------------------|
|                    |                                |                           | handlt1 händelse larger than 1 | 0 ingen eller en händelse |
| Step 1             | handlt1 händelse larger than 1 | 0 ingen eller en händelse | 12229                          | 0                         |
|                    |                                | 1 mer än en händelse      | 246                            | 0                         |
| Overall Percentage |                                |                           |                                |                           |

39  
40  
41  
42  
43  
44  
45  
46  
47  
48  
49  
50  
51  
52  
53  
54  
55  
56  
57  
58  
59  
60

### Classification Table<sup>a</sup>

| Observed           |                                |                           | Predicted          |
|--------------------|--------------------------------|---------------------------|--------------------|
|                    |                                |                           | Percentage Correct |
| Step 1             | handlt1 händelse larger than 1 | 0 ingen eller en händelse | 100,0              |
|                    |                                | 1 mer än en händelse      | ,0                 |
| Overall Percentage |                                |                           | 98,0               |

a. The cut value is ,500

## Variables in the Equation

|                     |            | B       | S.E.     | Wald    | df | Sig. | Exp(B) | 95% C.I. |
|---------------------|------------|---------|----------|---------|----|------|--------|----------|
|                     |            |         |          |         |    |      |        | Lower    |
| Step 1 <sup>a</sup> | sv5        |         |          | 2,348   | 4  | ,672 |        |          |
|                     | sv5(1)     | -,043   | ,232     | ,035    | 1  | ,852 | ,958   | ,608     |
|                     | sv5(2)     | ,042    | ,231     | ,034    | 1  | ,854 | 1,043  | ,664     |
|                     | sv5(3)     | -,047   | ,218     | ,046    | 1  | ,830 | ,954   | ,623     |
|                     | sv5(4)     | ,260    | ,236     | 1,209   | 1  | ,272 | 1,297  | ,816     |
|                     | VASTY2     |         |          | 118,861 | 35 | ,000 |        |          |
|                     | VASTY2(1)  | ,432    | ,577     | ,560    | 1  | ,454 | 1,541  | ,497     |
|                     | VASTY2(2)  | ,666    | ,556     | 1,435   | 1  | ,231 | 1,947  | ,654     |
|                     | VASTY2(3)  | -1,616  | 1,098    | 2,164   | 1  | ,141 | ,199   | ,023     |
|                     | VASTY2(4)  | ,481    | ,576     | ,698    | 1  | ,403 | 1,618  | ,523     |
|                     | VASTY2(5)  | -,427   | ,737     | ,335    | 1  | ,563 | ,653   | ,154     |
|                     | VASTY2(6)  | -17,125 | 2096,686 | ,000    | 1  | ,993 | ,000   | ,000     |
|                     | VASTY2(7)  | ,921    | ,538     | 2,932   | 1  | ,087 | 2,513  | ,875     |
|                     | VASTY2(8)  | ,345    | ,593     | ,340    | 1  | ,560 | 1,412  | ,442     |
|                     | VASTY2(9)  | ,246    | ,611     | ,163    | 1  | ,687 | 1,279  | ,386     |
|                     | VASTY2(10) | 1,415   | ,516     | 7,527   | 1  | ,006 | 4,117  | 1,498    |
|                     | VASTY2(11) | 1,474   | ,504     | 8,557   | 1  | ,003 | 4,366  | 1,626    |
|                     | VASTY2(12) | -,625   | ,740     | ,712    | 1  | ,399 | ,535   | ,125     |
|                     | VASTY2(13) | -,183   | ,653     | ,078    | 1  | ,780 | ,833   | ,232     |
|                     | VASTY2(14) | ,091    | ,615     | ,022    | 1  | ,882 | 1,096  | ,328     |
|                     | VASTY2(15) | ,044    | ,621     | ,005    | 1  | ,943 | 1,045  | ,310     |
|                     | VASTY2(16) | ,029    | ,741     | ,002    | 1  | ,969 | 1,029  | ,241     |
|                     | VASTY2(17) | -16,926 | 2093,759 | ,000    | 1  | ,994 | ,000   | ,000     |
|                     | VASTY2(18) | -16,872 | 2104,121 | ,000    | 1  | ,994 | ,000   | ,000     |
|                     | VASTY2(19) | -1,572  | 1,110    | 2,004   | 1  | ,157 | ,208   | ,024     |
|                     | VASTY2(20) | -,489   | ,741     | ,436    | 1  | ,509 | ,613   | ,144     |
|                     | VASTY2(21) | -,506   | ,735     | ,474    | 1  | ,491 | ,603   | ,143     |
|                     | VASTY2(22) | ,592    | ,563     | 1,105   | 1  | ,293 | 1,807  | ,599     |
|                     | VASTY2(23) | 1,598   | ,499     | 10,280  | 1  | ,001 | 4,945  | 1,861    |
|                     | VASTY2(24) | 1,287   | ,511     | 6,341   | 1  | ,012 | 3,621  | 1,330    |
|                     | VASTY2(25) | ,511    | ,594     | ,740    | 1  | ,390 | 1,666  | ,521     |
|                     | VASTY2(26) | -,083   | ,677     | ,015    | 1  | ,903 | ,921   | ,244     |
|                     | VASTY2(27) | -1,763  | 1,102    | 2,559   | 1  | ,110 | ,172   | ,020     |
|                     | VASTY2(28) | -1,444  | 1,112    | 1,685   | 1  | ,194 | ,236   | ,027     |
|                     | VASTY2(29) | -17,199 | 2095,974 | ,000    | 1  | ,993 | ,000   | ,000     |
|                     | VASTY2(30) | ,457    | ,577     | ,625    | 1  | ,429 | 1,579  | ,509     |
|                     | VASTY2(31) | 1,132   | ,538     | 4,424   | 1  | ,035 | 3,102  | 1,080    |
|                     | VASTY2(32) | ,030    | ,657     | ,002    | 1  | ,964 | 1,030  | ,284     |
|                     | VASTY2(33) | -,197   | ,695     | ,081    | 1  | ,776 | ,821   | ,210     |
|                     | VASTY2(34) | -1,656  | 1,098    | 2,273   | 1  | ,132 | ,191   | ,022     |
|                     | VASTY2(35) | 1,055   | ,534     | 3,895   | 1  | ,048 | 2,871  | 1,007    |
|                     | weekday    |         |          | 2,898   | 6  | ,822 |        |          |

Variables in the Equation

|                     |            | 95% C.I... |
|---------------------|------------|------------|
|                     |            | Upper      |
| Step 1 <sup>a</sup> | sv5        |            |
|                     | sv5(1)     | 1,508      |
|                     | sv5(2)     | 1,640      |
|                     | sv5(3)     | 1,462      |
|                     | sv5(4)     | 2,061      |
|                     | VASTY2     |            |
|                     | VASTY2(1)  | 4,779      |
|                     | VASTY2(2)  | 5,792      |
|                     | VASTY2(3)  | 1,711      |
|                     | VASTY2(4)  | 5,000      |
|                     | VASTY2(5)  | 2,769      |
|                     | VASTY2(6)  | .          |
|                     | VASTY2(7)  | 7,215      |
|                     | VASTY2(8)  | 4,512      |
|                     | VASTY2(9)  | 4,235      |
|                     | VASTY2(10) | 11,313     |
|                     | VASTY2(11) | 11,723     |
|                     | VASTY2(12) | 2,285      |
|                     | VASTY2(13) | 2,993      |
|                     | VASTY2(14) | 3,660      |
|                     | VASTY2(15) | 3,528      |
|                     | VASTY2(16) | 4,399      |
|                     | VASTY2(17) | .          |
|                     | VASTY2(18) | .          |
|                     | VASTY2(19) | 1,830      |
|                     | VASTY2(20) | 2,618      |
|                     | VASTY2(21) | 2,546      |
|                     | VASTY2(22) | 5,451      |
|                     | VASTY2(23) | 13,138     |
|                     | VASTY2(24) | 9,859      |
|                     | VASTY2(25) | 5,333      |
|                     | VASTY2(26) | 3,466      |
|                     | VASTY2(27) | 1,487      |
|                     | VASTY2(28) | 2,088      |
|                     | VASTY2(29) | .          |
|                     | VASTY2(30) | 4,896      |
|                     | VASTY2(31) | 8,909      |
|                     | VASTY2(32) | 3,733      |
|                     | VASTY2(33) | 3,206      |
|                     | VASTY2(34) | 1,643      |
|                     | VASTY2(35) | 8,181      |
|                     | weekday    |            |

Peer review only

## Variables in the Equation

|            | B      | S.E. | Wald   | df | Sig. | Exp(B) | 95% C.I. |
|------------|--------|------|--------|----|------|--------|----------|
|            |        |      |        |    |      |        | Lower    |
| weekday(1) | -,108  | ,235 | ,213   | 1  | ,644 | ,897   | ,567     |
| weekday(2) | -,168  | ,238 | ,498   | 1  | ,480 | ,845   | ,530     |
| weekday(3) | ,009   | ,229 | ,001   | 1  | ,970 | 1,009  | ,644     |
| weekday(4) | -,071  | ,236 | ,091   | 1  | ,763 | ,931   | ,587     |
| weekday(5) | -,374  | ,258 | 2,098  | 1  | ,147 | ,688   | ,415     |
| weekday(6) | -,126  | ,239 | ,276   | 1  | ,599 | ,882   | ,552     |
| holiday(1) | -,823  | ,596 | 1,910  | 1  | ,167 | ,439   | ,137     |
| season     |        |      | 5,918  | 4  | ,205 |        |          |
| season(1)  | ,069   | ,198 | ,122   | 1  | ,727 | 1,071  | ,727     |
| season(2)  | -,251  | ,200 | 1,574  | 1  | ,210 | ,778   | ,526     |
| season(3)  | ,223   | ,190 | 1,385  | 1  | ,239 | 1,250  | ,862     |
| season(4)  | -,111  | ,214 | ,270   | 1  | ,603 | ,895   | ,589     |
| Constant   | -4,123 | ,505 | 66,525 | 1  | ,000 | ,016   |          |

## Variables in the Equation

|            | 95% C.I. |
|------------|----------|
|            | Upper    |
| weekday(1) | 1,421    |
| weekday(2) | 1,348    |
| weekday(3) | 1,580    |
| weekday(4) | 1,478    |
| weekday(5) | 1,141    |
| weekday(6) | 1,409    |
| holiday(1) | 1,411    |
| season     |          |
| season(1)  | 1,579    |
| season(2)  | 1,151    |
| season(3)  | 1,813    |
| season(4)  | 1,360    |
| Constant   |          |

a. Variable(s) entered on step 1: sv5, VASTY2, weekday, holiday, season.

```
LOGISTIC REGRESSION VARIABLES handlt1
/METHOD=ENTER sv7 VASTY2 weekday holiday season
/CONTRAST (sv7)=Indicator(1)
/CONTRAST (VASTY2)=Indicator(1)
/CONTRAST (weekday)=Indicator(1)
/CONTRAST (holiday)=Indicator(1)
/CONTRAST (season)=Indicator(1)
```

```
/PRINT=CI(95)
/CRITERIA=PIN(0.05) POUT(0.10) ITERATE(20) CUT(0.5).
```

**Block 1: Method = Enter**

**Omnibus Tests of Model Coefficients**

|        |       | Chi-square | df | Sig. |
|--------|-------|------------|----|------|
| Step 1 | Step  | 231,067    | 52 | ,000 |
|        | Block | 231,067    | 52 | ,000 |
|        | Model | 231,067    | 52 | ,000 |

**Model Summary**

| Step | -2 Log likelihood    | Cox & Snell R Square | Nagelkerke R Square |
|------|----------------------|----------------------|---------------------|
| 1    | 2187,72 <sup>a</sup> | ,018                 | ,104                |

a. Estimation terminated at iteration number 20 because maximum iterations has been reached. Final solution cannot be found.

**Classification Table<sup>a</sup>**

| Observed           |                                |                           | Predicted                 |                      |
|--------------------|--------------------------------|---------------------------|---------------------------|----------------------|
|                    |                                |                           | 0 ingen eller en händelse | 1 mer än en händelse |
| Step 1             | handlt1 händelse larger than 1 | 0 ingen eller en händelse | 12229                     | 0                    |
|                    |                                | 1 mer än en händelse      | 246                       | 0                    |
| Overall Percentage |                                |                           |                           |                      |

**Classification Table<sup>a</sup>**

| Observed           |                                |                           | Predicted          |
|--------------------|--------------------------------|---------------------------|--------------------|
|                    |                                |                           | Percentage Correct |
| Step 1             | handlt1 händelse larger than 1 | 0 ingen eller en händelse | 100,0              |
|                    |                                | 1 mer än en händelse      | ,0                 |
| Overall Percentage |                                |                           | 98,0               |

a. The cut value is ,500

## Variables in the Equation

|                     |            | B       | S.E.     | Wald    | df | Sig. | Exp(B) | 95% C.I. |
|---------------------|------------|---------|----------|---------|----|------|--------|----------|
|                     |            |         |          |         |    |      |        | Lower    |
| Step 1 <sup>a</sup> | sv7        |         |          | 9,407   | 6  | ,152 |        |          |
|                     | sv7(1)     | -,011   | ,268     | ,002    | 1  | ,969 | ,990   | ,586     |
|                     | sv7(2)     | ,033    | ,283     | ,014    | 1  | ,907 | 1,034  | ,594     |
|                     | sv7(3)     | ,076    | ,272     | ,077    | 1  | ,781 | 1,079  | ,633     |
|                     | sv7(4)     | -,037   | ,269     | ,019    | 1  | ,891 | ,964   | ,569     |
|                     | sv7(5)     | ,181    | ,248     | ,531    | 1  | ,466 | 1,198  | ,737     |
|                     | sv7(6)     | ,702    | ,281     | 6,219   | 1  | ,013 | 2,017  | 1,162    |
|                     | VASTY2     |         |          | 121,309 | 35 | ,000 |        |          |
|                     | VASTY2(1)  | ,372    | ,578     | ,413    | 1  | ,520 | 1,450  | ,467     |
|                     | VASTY2(2)  | ,480    | ,559     | ,735    | 1  | ,391 | 1,616  | ,540     |
|                     | VASTY2(3)  | -1,607  | 1,099    | 2,140   | 1  | ,144 | ,200   | ,023     |
|                     | VASTY2(4)  | ,459    | ,576     | ,635    | 1  | ,425 | 1,583  | ,512     |
|                     | VASTY2(5)  | -,413   | ,737     | ,313    | 1  | ,576 | ,662   | ,156     |
|                     | VASTY2(6)  | -17,450 | 2090,548 | ,000    | 1  | ,993 | ,000   | ,000     |
|                     | VASTY2(7)  | ,915    | ,538     | 2,891   | 1  | ,089 | 2,497  | ,870     |
|                     | VASTY2(8)  | ,357    | ,593     | ,363    | 1  | ,547 | 1,429  | ,447     |
|                     | VASTY2(9)  | ,240    | ,611     | ,154    | 1  | ,694 | 1,271  | ,384     |
|                     | VASTY2(10) | 1,198   | ,520     | 5,311   | 1  | ,021 | 3,313  | 1,196    |
|                     | VASTY2(11) | 1,462   | ,504     | 8,400   | 1  | ,004 | 4,315  | 1,605    |
|                     | VASTY2(12) | -,754   | ,742     | 1,034   | 1  | ,309 | ,470   | ,110     |
|                     | VASTY2(13) | -,434   | ,657     | ,437    | 1  | ,509 | ,648   | ,179     |
|                     | VASTY2(14) | -,039   | ,617     | ,004    | 1  | ,950 | ,962   | ,287     |
|                     | VASTY2(15) | -,160   | ,625     | ,065    | 1  | ,798 | ,853   | ,251     |
|                     | VASTY2(16) | -,122   | ,744     | ,027    | 1  | ,870 | ,885   | ,206     |
|                     | VASTY2(17) | -16,959 | 2089,320 | ,000    | 1  | ,994 | ,000   | ,000     |
|                     | VASTY2(18) | -16,867 | 2104,368 | ,000    | 1  | ,994 | ,000   | ,000     |
|                     | VASTY2(19) | -1,565  | 1,114    | 1,974   | 1  | ,160 | ,209   | ,024     |
|                     | VASTY2(20) | -,673   | ,744     | ,817    | 1  | ,366 | ,510   | ,119     |
|                     | VASTY2(21) | -,515   | ,735     | ,491    | 1  | ,484 | ,598   | ,142     |
|                     | VASTY2(22) | ,589    | ,563     | 1,095   | 1  | ,295 | 1,803  | ,598     |
|                     | VASTY2(23) | 1,600   | ,499     | 10,297  | 1  | ,001 | 4,953  | 1,864    |
|                     | VASTY2(24) | 1,214   | ,512     | 5,619   | 1  | ,018 | 3,366  | 1,234    |
|                     | VASTY2(25) | ,518    | ,594     | ,761    | 1  | ,383 | 1,679  | ,524     |
|                     | VASTY2(26) | -,126   | ,677     | ,034    | 1  | ,853 | ,882   | ,234     |
|                     | VASTY2(27) | -1,951  | 1,105    | 3,122   | 1  | ,077 | ,142   | ,016     |
|                     | VASTY2(28) | -1,815  | 1,118    | 2,633   | 1  | ,105 | ,163   | ,018     |
|                     | VASTY2(29) | -17,588 | 2095,379 | ,000    | 1  | ,993 | ,000   | ,000     |
|                     | VASTY2(30) | ,462    | ,578     | ,641    | 1  | ,423 | 1,588  | ,512     |
|                     | VASTY2(31) | 1,133   | ,539     | 4,414   | 1  | ,036 | 3,105  | 1,079    |
|                     | VASTY2(32) | ,036    | ,661     | ,003    | 1  | ,957 | 1,037  | ,284     |
|                     | VASTY2(33) | -,191   | ,701     | ,074    | 1  | ,786 | ,826   | ,209     |
|                     | VASTY2(34) | -1,674  | 1,098    | 2,323   | 1  | ,127 | ,187   | ,022     |

## Variables in the Equation

|                     |            | 95% C.I... |
|---------------------|------------|------------|
|                     |            | Upper      |
| Step 1 <sup>a</sup> | sv7        |            |
|                     | sv7(1)     | 1,672      |
|                     | sv7(2)     | 1,799      |
|                     | sv7(3)     | 1,840      |
|                     | sv7(4)     | 1,634      |
|                     | sv7(5)     | 1,948      |
|                     | sv7(6)     | 3,502      |
|                     | VASTY2     |            |
|                     | VASTY2(1)  | 4,503      |
|                     | VASTY2(2)  | 4,836      |
|                     | VASTY2(3)  | 1,727      |
|                     | VASTY2(4)  | 4,897      |
|                     | VASTY2(5)  | 2,809      |
|                     | VASTY2(6)  | .          |
|                     | VASTY2(7)  | 7,170      |
|                     | VASTY2(8)  | 4,570      |
|                     | VASTY2(9)  | 4,209      |
|                     | VASTY2(10) | 9,176      |
|                     | VASTY2(11) | 11,600     |
|                     | VASTY2(12) | 2,012      |
|                     | VASTY2(13) | 2,347      |
|                     | VASTY2(14) | 3,226      |
|                     | VASTY2(15) | 2,901      |
|                     | VASTY2(16) | 3,808      |
|                     | VASTY2(17) | .          |
|                     | VASTY2(18) | .          |
|                     | VASTY2(19) | 1,856      |
|                     | VASTY2(20) | 2,195      |
|                     | VASTY2(21) | 2,523      |
|                     | VASTY2(22) | 5,437      |
|                     | VASTY2(23) | 13,162     |
|                     | VASTY2(24) | 9,180      |
|                     | VASTY2(25) | 5,375      |
|                     | VASTY2(26) | 3,324      |
|                     | VASTY2(27) | 1,238      |
|                     | VASTY2(28) | 1,458      |
|                     | VASTY2(29) | .          |
|                     | VASTY2(30) | 4,926      |
|                     | VASTY2(31) | 8,935      |
|                     | VASTY2(32) | 3,789      |
|                     | VASTY2(33) | 3,265      |
|                     | VASTY2(34) | 1,614      |

Variables in the Equation

|            | B      | S.E. | Wald   | df | Sig. | Exp(B) | 95% C.I. |
|------------|--------|------|--------|----|------|--------|----------|
|            |        |      |        |    |      |        | Lower    |
| VASTY2(35) | ,990   | ,535 | 3,416  | 1  | ,065 | 2,690  | ,942     |
| weekday    |        |      | 2,922  | 6  | ,819 |        |          |
| weekday(1) | -,105  | ,235 | ,199   | 1  | ,655 | ,900   | ,568     |
| weekday(2) | -,154  | ,239 | ,419   | 1  | ,517 | ,857   | ,537     |
| weekday(3) | ,026   | ,229 | ,013   | 1  | ,910 | 1,026  | ,655     |
| weekday(4) | -,040  | ,236 | ,029   | 1  | ,864 | ,960   | ,605     |
| weekday(5) | -,362  | ,258 | 1,958  | 1  | ,162 | ,697   | ,420     |
| weekday(6) | -,128  | ,240 | ,285   | 1  | ,594 | ,880   | ,550     |
| holiday(1) | -,821  | ,596 | 1,895  | 1  | ,169 | ,440   | ,137     |
| season     |        |      | 5,341  | 4  | ,254 |        |          |
| season(1)  | ,084   | ,198 | ,180   | 1  | ,671 | 1,088  | ,738     |
| season(2)  | -,219  | ,200 | 1,201  | 1  | ,273 | ,803   | ,542     |
| season(3)  | ,226   | ,190 | 1,422  | 1  | ,233 | 1,254  | ,864     |
| season(4)  | -,102  | ,214 | ,229   | 1  | ,632 | ,903   | ,594     |
| Constant   | -4,184 | ,515 | 65,910 | 1  | ,000 | ,015   |          |

Variables in the Equation

|            | 95% C.I. |
|------------|----------|
|            | Upper    |
| VASTY2(35) | 7,682    |
| weekday    |          |
| weekday(1) | 1,427    |
| weekday(2) | 1,368    |
| weekday(3) | 1,608    |
| weekday(4) | 1,525    |
| weekday(5) | 1,156    |
| weekday(6) | 1,407    |
| holiday(1) | 1,416    |
| season     |          |
| season(1)  | 1,603    |
| season(2)  | 1,189    |
| season(3)  | 1,820    |
| season(4)  | 1,373    |
| Constant   |          |

a. Variable(s) entered on step 1: sv7, VASTY2, weekday, holiday, season.

\*\*

LOGISTIC REGRESSION VARIABLES dod01



```

1  /METHOD=ENTER bv1 VASTY2 weekday holiday season
2
3
4  /CONTRAST (bv1)=Indicator(1)
5
6  /CONTRAST (VASTY2)=Indicator(1)
7
8  /CONTRAST (weekday)=Indicator(1)
9
10 /CONTRAST (holiday)=Indicator(1)
11
12 /CONTRAST (season)=Indicator(1)
13
14 /PRINT=CI(95)
15
16 /CRITERIA=PIN(0.05) POUT(0.10) ITERATE(20) CUT(0.5).

```

## Block 1: Method = Enter

### Omnibus Tests of Model Coefficients

|        |       | Chi-square | df | Sig. |
|--------|-------|------------|----|------|
| Step 1 | Step  | 738,299    | 48 | ,000 |
|        | Block | 738,299    | 48 | ,000 |
|        | Model | 738,299    | 48 | ,000 |

### Model Summary

| Step | -2 Log likelihood    | Cox & Snell R Square | Nagelkerke R Square |
|------|----------------------|----------------------|---------------------|
| 1    | 4286,54 <sup>a</sup> | ,057                 | ,173                |

a. Estimation terminated at iteration number 20 because maximum iterations has been reached. Final solution cannot be found.

### Classification Table<sup>a</sup>

| Observed           |                             | Predicted                   |                      |                    |       |
|--------------------|-----------------------------|-----------------------------|----------------------|--------------------|-------|
|                    |                             | dod01 dödsfall ja eller nej |                      | Percentage Correct |       |
|                    |                             | 0 inget dödsfall            | 1 minst ett dödsfall |                    |       |
| Step 1             | dod01 dödsfall ja eller nej | 0 inget dödsfall            | 11839                | 0                  | 100,0 |
|                    |                             | 1 minst ett dödsfall        | 636                  | 0                  | ,0    |
| Overall Percentage |                             |                             |                      |                    | 94,9  |

a. The cut value is ,500

## Variables in the Equation

|                     |            | B       | S.E.     | Wald    | df | Sig. | Exp(B) | 95% C.I. |
|---------------------|------------|---------|----------|---------|----|------|--------|----------|
|                     |            |         |          |         |    |      |        | Lower    |
| Step 1 <sup>a</sup> | bv1        |         |          | 22,025  | 2  | ,000 |        |          |
|                     | bv1(1)     | -,254   | ,130     | 3,791   | 1  | ,052 | ,776   | ,601     |
|                     | bv1(2)     | ,355    | ,098     | 13,074  | 1  | ,000 | 1,426  | 1,176    |
|                     | VASTY2     |         |          | 210,364 | 35 | ,000 |        |          |
|                     | VASTY2(1)  | ,595    | ,343     | 3,010   | 1  | ,083 | 1,813  | ,926     |
|                     | VASTY2(2)  | ,712    | ,335     | 4,516   | 1  | ,034 | 2,038  | 1,057    |
|                     | VASTY2(3)  | ,607    | ,335     | 3,275   | 1  | ,070 | 1,835  | ,951     |
|                     | VASTY2(4)  | ,016    | ,372     | ,002    | 1  | ,967 | 1,016  | ,490     |
|                     | VASTY2(5)  | -,856   | ,495     | 2,992   | 1  | ,084 | ,425   | ,161     |
|                     | VASTY2(6)  | -18,136 | 2096,795 | ,000    | 1  | ,993 | ,000   | ,000     |
|                     | VASTY2(7)  | 1,447   | ,311     | 21,666  | 1  | ,000 | 4,250  | 2,311    |
|                     | VASTY2(8)  | ,734    | ,332     | 4,874   | 1  | ,027 | 2,083  | 1,086    |
|                     | VASTY2(9)  | ,266    | ,362     | ,538    | 1  | ,463 | 1,305  | ,641     |
|                     | VASTY2(10) | ,718    | ,334     | 4,632   | 1  | ,031 | 2,051  | 1,066    |
|                     | VASTY2(11) | ,314    | ,358     | ,770    | 1  | ,380 | 1,368  | ,679     |
|                     | VASTY2(12) | 1,212   | ,315     | 14,756  | 1  | ,000 | 3,360  | 1,810    |
|                     | VASTY2(13) | 1,347   | ,312     | 18,705  | 1  | ,000 | 3,848  | 2,089    |
|                     | VASTY2(14) | ,681    | ,334     | 4,149   | 1  | ,042 | 1,976  | 1,026    |
|                     | VASTY2(15) | ,112    | ,370     | ,092    | 1  | ,762 | 1,119  | ,542     |
|                     | VASTY2(16) | -,938   | ,645     | 2,118   | 1  | ,146 | ,391   | ,111     |
|                     | VASTY2(17) | -17,973 | 2093,394 | ,000    | 1  | ,993 | ,000   | ,000     |
|                     | VASTY2(18) | -2,705  | 1,038    | 6,788   | 1  | ,009 | ,067   | ,009     |
|                     | VASTY2(19) | -2,465  | 1,041    | 5,603   | 1  | ,018 | ,085   | ,011     |
|                     | VASTY2(20) | -1,513  | ,643     | 5,548   | 1  | ,018 | ,220   | ,062     |
|                     | VASTY2(21) | ,497    | ,346     | 2,070   | 1  | ,150 | 1,644  | ,835     |
|                     | VASTY2(22) | 1,237   | ,322     | 14,789  | 1  | ,000 | 3,447  | 1,834    |
|                     | VASTY2(23) | ,529    | ,348     | 2,312   | 1  | ,128 | 1,698  | ,858     |
|                     | VASTY2(24) | 1,281   | ,313     | 16,785  | 1  | ,000 | 3,602  | 1,951    |
|                     | VASTY2(25) | -,227   | ,435     | ,271    | 1  | ,603 | ,797   | ,340     |
|                     | VASTY2(26) | -18,096 | 2344,694 | ,000    | 1  | ,994 | ,000   | ,000     |
|                     | VASTY2(27) | -18,135 | 2090,509 | ,000    | 1  | ,993 | ,000   | ,000     |
|                     | VASTY2(28) | -18,092 | 2670,146 | ,000    | 1  | ,995 | ,000   | ,000     |
|                     | VASTY2(29) | -18,069 | 2093,350 | ,000    | 1  | ,993 | ,000   | ,000     |
|                     | VASTY2(30) | -,084   | ,386     | ,047    | 1  | ,828 | ,920   | ,431     |
|                     | VASTY2(31) | -18,052 | 2088,876 | ,000    | 1  | ,993 | ,000   | ,000     |
|                     | VASTY2(32) | -1,973  | ,761     | 6,730   | 1  | ,009 | ,139   | ,031     |
|                     | VASTY2(33) | -2,697  | 1,038    | 6,747   | 1  | ,009 | ,067   | ,009     |
|                     | VASTY2(34) | ,421    | ,351     | 1,440   | 1  | ,230 | 1,524  | ,766     |
|                     | VASTY2(35) | -18,181 | 2253,097 | ,000    | 1  | ,994 | ,000   | ,000     |
|                     | weekday    |         |          | 3,187   | 6  | ,785 |        |          |
|                     | weekday(1) | ,020    | ,153     | ,016    | 1  | ,898 | 1,020  | ,756     |
|                     | weekday(2) | -,071   | ,156     | ,206    | 1  | ,650 | ,932   | ,686     |

Variables in the Equation

|                     |            | 95% C.I... |
|---------------------|------------|------------|
|                     |            | Upper      |
| Step 1 <sup>a</sup> | bv1        |            |
|                     | bv1(1)     | 1,002      |
|                     | bv1(2)     | 1,728      |
|                     | VASTY2     |            |
|                     | VASTY2(1)  | 3,552      |
|                     | VASTY2(2)  | 3,929      |
|                     | VASTY2(3)  | 3,542      |
|                     | VASTY2(4)  | 2,104      |
|                     | VASTY2(5)  | 1,121      |
|                     | VASTY2(6)  | .          |
|                     | VASTY2(7)  | 7,816      |
|                     | VASTY2(8)  | 3,995      |
|                     | VASTY2(9)  | 2,654      |
|                     | VASTY2(10) | 3,944      |
|                     | VASTY2(11) | 2,758      |
|                     | VASTY2(12) | 6,235      |
|                     | VASTY2(13) | 7,086      |
|                     | VASTY2(14) | 3,807      |
|                     | VASTY2(15) | 2,309      |
|                     | VASTY2(16) | 1,385      |
|                     | VASTY2(17) | .          |
|                     | VASTY2(18) | ,512       |
|                     | VASTY2(19) | ,654       |
|                     | VASTY2(20) | ,776       |
|                     | VASTY2(21) | 3,238      |
|                     | VASTY2(22) | 6,476      |
|                     | VASTY2(23) | 3,359      |
|                     | VASTY2(24) | 6,649      |
|                     | VASTY2(25) | 1,871      |
|                     | VASTY2(26) | .          |
|                     | VASTY2(27) | .          |
|                     | VASTY2(28) | .          |
|                     | VASTY2(29) | .          |
|                     | VASTY2(30) | 1,961      |
|                     | VASTY2(31) | .          |
|                     | VASTY2(32) | ,617       |
|                     | VASTY2(33) | ,516       |
|                     | VASTY2(34) | 3,031      |
|                     | VASTY2(35) | .          |
|                     | weekday    |            |
|                     | weekday(1) | 1,375      |
|                     | weekday(2) | 1,265      |

Peer review only

Variables in the Equation

|            | B      | S.E. | Wald    | df | Sig. | Exp(B) | 95% C.I. |
|------------|--------|------|---------|----|------|--------|----------|
|            |        |      |         |    |      |        | Lower    |
| weekday(3) | ,040   | ,153 | ,070    | 1  | ,792 | 1,041  | ,772     |
| weekday(4) | ,029   | ,154 | ,035    | 1  | ,853 | 1,029  | ,761     |
| weekday(5) | -,059  | ,158 | ,140    | 1  | ,708 | ,942   | ,691     |
| weekday(6) | -,198  | ,162 | 1,507   | 1  | ,220 | ,820   | ,597     |
| holiday(1) | -,239  | ,256 | ,871    | 1  | ,351 | ,788   | ,477     |
| season     |        |      | 7,376   | 4  | ,117 |        |          |
| season(1)  | ,039   | ,129 | ,093    | 1  | ,760 | 1,040  | ,808     |
| season(2)  | ,094   | ,118 | ,634    | 1  | ,426 | 1,099  | ,871     |
| season(3)  | -,061  | ,132 | ,213    | 1  | ,645 | ,941   | ,726     |
| season(4)  | -,279  | ,142 | 3,840   | 1  | ,050 | ,756   | ,572     |
| Constant   | -3,143 | ,302 | 108,344 | 1  | ,000 | ,043   |          |

Variables in the Equation

|            | 95% C.I. |
|------------|----------|
|            | Upper    |
| weekday(3) | 1,405    |
| weekday(4) | 1,392    |
| weekday(5) | 1,285    |
| weekday(6) | 1,126    |
| holiday(1) | 1,300    |
| season     |          |
| season(1)  | 1,338    |
| season(2)  | 1,386    |
| season(3)  | 1,220    |
| season(4)  | 1,000    |
| Constant   |          |

a. Variable(s) entered on step 1: bv1, VASTY2, weekday, holiday, season.

LOGISTIC REGRESSION VARIABLES dod01

/METHOD=ENTER bv2 VASTY2 weekday holiday season

/CONTRAST (bv2)=Indicator(1)

/CONTRAST (VASTY2)=Indicator(1)

/CONTRAST (weekday)=Indicator(1)

/CONTRAST (holiday)=Indicator(1)

/CONTRAST (season)=Indicator(1)

/PRINT=CI(95)

/CRITERIA=PIN(0.05) POUT(0.10) ITERATE(20) CUT(0.5).

**Block 1: Method = Enter**

## Omnibus Tests of Model Coefficients

|        |       | Chi-square | df | Sig. |
|--------|-------|------------|----|------|
| Step 1 | Step  | 732,200    | 48 | ,000 |
|        | Block | 732,200    | 48 | ,000 |
|        | Model | 732,200    | 48 | ,000 |

## Model Summary

| Step | -2 Log likelihood    | Cox & Snell R Square | Nagelkerke R Square |
|------|----------------------|----------------------|---------------------|
| 1    | 4292,64 <sup>a</sup> | ,057                 | ,172                |

a. Estimation terminated at iteration number 20 because maximum iterations has been reached. Final solution cannot be found.

Classification Table<sup>a</sup>

| Observed           |                             | Predicted                   |                      |                    |       |
|--------------------|-----------------------------|-----------------------------|----------------------|--------------------|-------|
|                    |                             | dod01 dödsfall ja eller nej |                      | Percentage Correct |       |
|                    |                             | 0 inget dödsfall            | 1 minst ett dödsfall |                    |       |
| Step 1             | dod01 dödsfall ja eller nej | 0 inget dödsfall            | 11839                | 0                  | 100,0 |
|                    |                             | 1 minst ett dödsfall        | 636                  | 0                  | ,0    |
| Overall Percentage |                             |                             |                      |                    | 94,9  |

a. The cut value is ,500

## Variables in the Equation

|                     |            | B       | S.E.     | Wald    | df | Sig. | Exp(B) | 95% C.I. |
|---------------------|------------|---------|----------|---------|----|------|--------|----------|
|                     |            |         |          |         |    |      |        | Lower    |
| Step 1 <sup>a</sup> | bv2        |         |          | 15,899  | 2  | ,000 |        |          |
|                     | bv2(1)     | -,136   | ,126     | 1,154   | 1  | ,283 | ,873   | ,681     |
|                     | bv2(2)     | ,297    | ,111     | 7,203   | 1  | ,007 | 1,346  | 1,083    |
|                     | VASTY2     |         |          | 215,791 | 35 | ,000 |        |          |
|                     | VASTY2(1)  | ,590    | ,343     | 2,955   | 1  | ,086 | 1,803  | ,921     |
|                     | VASTY2(2)  | ,718    | ,335     | 4,589   | 1  | ,032 | 2,050  | 1,063    |
|                     | VASTY2(3)  | ,665    | ,334     | 3,958   | 1  | ,047 | 1,945  | 1,010    |
|                     | VASTY2(4)  | ,057    | ,371     | ,024    | 1  | ,877 | 1,059  | ,512     |
|                     | VASTY2(5)  | -,842   | ,495     | 2,891   | 1  | ,089 | ,431   | ,163     |
|                     | VASTY2(6)  | -18,087 | 2099,316 | ,000    | 1  | ,993 | ,000   | ,000     |
|                     | VASTY2(7)  | 1,507   | ,309     | 23,735  | 1  | ,000 | 4,515  | 2,462    |
|                     | VASTY2(8)  | ,742    | ,332     | 4,976   | 1  | ,026 | 2,099  | 1,094    |
|                     | VASTY2(9)  | ,286    | ,362     | ,623    | 1  | ,430 | 1,331  | ,654     |
|                     | VASTY2(10) | ,732    | ,334     | 4,810   | 1  | ,028 | 2,079  | 1,081    |
|                     | VASTY2(11) | ,334    | ,357     | ,872    | 1  | ,350 | 1,396  | ,693     |
|                     | VASTY2(12) | 1,227   | ,315     | 15,127  | 1  | ,000 | 3,411  | 1,838    |
|                     | VASTY2(13) | 1,378   | ,311     | 19,565  | 1  | ,000 | 3,966  | 2,154    |
|                     | VASTY2(14) | ,704    | ,334     | 4,438   | 1  | ,035 | 2,022  | 1,050    |
|                     | VASTY2(15) | ,113    | ,370     | ,094    | 1  | ,759 | 1,120  | ,542     |
|                     | VASTY2(16) | -,914   | ,644     | 2,011   | 1  | ,156 | ,401   | ,113     |
|                     | VASTY2(17) | -17,964 | 2095,460 | ,000    | 1  | ,993 | ,000   | ,000     |
|                     | VASTY2(18) | -2,695  | 1,038    | 6,742   | 1  | ,009 | ,068   | ,009     |
|                     | VASTY2(19) | -2,518  | 1,040    | 5,863   | 1  | ,015 | ,081   | ,011     |
|                     | VASTY2(20) | -1,475  | ,642     | 5,277   | 1  | ,022 | ,229   | ,065     |
|                     | VASTY2(21) | ,509    | ,346     | 2,173   | 1  | ,140 | 1,664  | ,845     |
|                     | VASTY2(22) | 1,243   | ,322     | 14,890  | 1  | ,000 | 3,467  | 1,844    |
|                     | VASTY2(23) | ,525    | ,348     | 2,278   | 1  | ,131 | 1,691  | ,855     |
|                     | VASTY2(24) | 1,318   | ,312     | 17,795  | 1  | ,000 | 3,735  | 2,025    |
|                     | VASTY2(25) | -,219   | ,435     | ,252    | 1  | ,616 | ,804   | ,342     |
|                     | VASTY2(26) | -18,080 | 2347,813 | ,000    | 1  | ,994 | ,000   | ,000     |
|                     | VASTY2(27) | -18,111 | 2093,393 | ,000    | 1  | ,993 | ,000   | ,000     |
|                     | VASTY2(28) | -18,082 | 2671,282 | ,000    | 1  | ,995 | ,000   | ,000     |
|                     | VASTY2(29) | -18,045 | 2094,144 | ,000    | 1  | ,993 | ,000   | ,000     |
|                     | VASTY2(30) | -,064   | ,386     | ,027    | 1  | ,868 | ,938   | ,440     |
|                     | VASTY2(31) | -18,032 | 2092,735 | ,000    | 1  | ,993 | ,000   | ,000     |
|                     | VASTY2(32) | -1,966  | ,760     | 6,688   | 1  | ,010 | ,140   | ,032     |
|                     | VASTY2(33) | -2,688  | 1,038    | 6,703   | 1  | ,010 | ,068   | ,009     |
|                     | VASTY2(34) | ,434    | ,351     | 1,530   | 1  | ,216 | 1,543  | ,776     |
|                     | VASTY2(35) | -18,128 | 2256,013 | ,000    | 1  | ,994 | ,000   | ,000     |
|                     | weekday    |         |          | 3,035   | 6  | ,804 |        |          |
|                     | weekday(1) | ,028    | ,152     | ,035    | 1  | ,853 | 1,029  | ,763     |
|                     | weekday(2) | -,065   | ,156     | ,174    | 1  | ,677 | ,937   | ,690     |

Variables in the Equation

|                     |            | 95% C.I... |
|---------------------|------------|------------|
|                     |            | Upper      |
| Step 1 <sup>a</sup> | bv2        |            |
|                     | bv2(1)     | 1,119      |
|                     | bv2(2)     | 1,671      |
|                     | VASTY2     |            |
|                     | VASTY2(1)  | 3,532      |
|                     | VASTY2(2)  | 3,952      |
|                     | VASTY2(3)  | 3,747      |
|                     | VASTY2(4)  | 2,191      |
|                     | VASTY2(5)  | 1,137      |
|                     | VASTY2(6)  | .          |
|                     | VASTY2(7)  | 8,279      |
|                     | VASTY2(8)  | 4,027      |
|                     | VASTY2(9)  | 2,706      |
|                     | VASTY2(10) | 3,998      |
|                     | VASTY2(11) | 2,812      |
|                     | VASTY2(12) | 6,329      |
|                     | VASTY2(13) | 7,302      |
|                     | VASTY2(14) | 3,892      |
|                     | VASTY2(15) | 2,313      |
|                     | VASTY2(16) | 1,418      |
|                     | VASTY2(17) | .          |
|                     | VASTY2(18) | ,516       |
|                     | VASTY2(19) | ,619       |
|                     | VASTY2(20) | ,805       |
|                     | VASTY2(21) | 3,277      |
|                     | VASTY2(22) | 6,518      |
|                     | VASTY2(23) | 3,344      |
|                     | VASTY2(24) | 6,890      |
|                     | VASTY2(25) | 1,886      |
|                     | VASTY2(26) | .          |
|                     | VASTY2(27) | .          |
|                     | VASTY2(28) | .          |
|                     | VASTY2(29) | .          |
|                     | VASTY2(30) | 1,999      |
|                     | VASTY2(31) | .          |
|                     | VASTY2(32) | ,621       |
|                     | VASTY2(33) | ,520       |
|                     | VASTY2(34) | 3,070      |
|                     | VASTY2(35) | .          |
|                     | weekday    |            |
|                     | weekday(1) | 1,387      |
|                     | weekday(2) | 1,272      |

Peer review only

Variables in the Equation

|            | B      | S.E. | Wald    | df | Sig. | Exp(B) | 95% C.I. |
|------------|--------|------|---------|----|------|--------|----------|
|            |        |      |         |    |      |        | Lower    |
| weekday(3) | ,041   | ,153 | ,071    | 1  | ,790 | 1,041  | ,772     |
| weekday(4) | ,022   | ,154 | ,020    | 1  | ,886 | 1,022  | ,756     |
| weekday(5) | -,061  | ,158 | ,151    | 1  | ,697 | ,940   | ,690     |
| weekday(6) | -,192  | ,162 | 1,411   | 1  | ,235 | ,825   | ,601     |
| holiday(1) | -,240  | ,256 | ,880    | 1  | ,348 | ,787   | ,476     |
| season     |        |      | 7,122   | 4  | ,130 |        |          |
| season(1)  | ,034   | ,129 | ,072    | 1  | ,789 | 1,035  | ,805     |
| season(2)  | ,076   | ,118 | ,412    | 1  | ,521 | 1,079  | ,856     |
| season(3)  | -,070  | ,132 | ,284    | 1  | ,594 | ,932   | ,719     |
| season(4)  | -,286  | ,142 | 4,034   | 1  | ,045 | ,751   | ,568     |
| Constant   | -3,181 | ,308 | 106,553 | 1  | ,000 | ,042   |          |

Variables in the Equation

|            | 95% C.I. |
|------------|----------|
|            | Upper    |
| weekday(3) | 1,405    |
| weekday(4) | 1,383    |
| weekday(5) | 1,282    |
| weekday(6) | 1,133    |
| holiday(1) | 1,299    |
| season     |          |
| season(1)  | 1,332    |
| season(2)  | 1,360    |
| season(3)  | 1,208    |
| season(4)  | ,993     |
| Constant   |          |

a. Variable(s) entered on step 1: bv2, VASTY2, weekday, holiday, season.

LOGISTIC REGRESSION VARIABLES dod01

/METHOD=ENTER bv3 VASTY2 weekday holiday season

/CONTRAST (bv3)=Indicator(1)

/CONTRAST (VASTY2)=Indicator(1)

/CONTRAST (weekday)=Indicator(1)

/CONTRAST (holiday)=Indicator(1)

/CONTRAST (season)=Indicator(1)

/PRINT=CI(95)

/CRITERIA=PIN(0.05) POUT(0.10) ITERATE(20) CUT(0.5).

**Block 1: Method = Enter**



## Omnibus Tests of Model Coefficients

|        |       | Chi-square | df | Sig. |
|--------|-------|------------|----|------|
| Step 1 | Step  | 730,904    | 48 | ,000 |
|        | Block | 730,904    | 48 | ,000 |
|        | Model | 730,904    | 48 | ,000 |

## Model Summary

| Step | -2 Log likelihood    | Cox & Snell R Square | Nagelkerke R Square |
|------|----------------------|----------------------|---------------------|
| 1    | 4293,94 <sup>a</sup> | ,057                 | ,172                |

a. Estimation terminated at iteration number 20 because maximum iterations has been reached. Final solution cannot be found.

Classification Table<sup>a</sup>

| Observed           |                             | Predicted                   |                      |                    |       |
|--------------------|-----------------------------|-----------------------------|----------------------|--------------------|-------|
|                    |                             | dod01 dödsfall ja eller nej |                      | Percentage Correct |       |
|                    |                             | 0 inget dödsfall            | 1 minst ett dödsfall |                    |       |
| Step 1             | dod01 dödsfall ja eller nej | 0 inget dödsfall            | 11839                | 0                  | 100,0 |
|                    |                             | 1 minst ett dödsfall        | 636                  | 0                  | ,0    |
| Overall Percentage |                             |                             |                      |                    | 94,9  |

a. The cut value is ,500

## Variables in the Equation

|                     |            | B       | S.E.     | Wald    | df | Sig. | Exp(B) | 95% C.I. |
|---------------------|------------|---------|----------|---------|----|------|--------|----------|
|                     |            |         |          |         |    |      |        | Lower    |
| Step 1 <sup>a</sup> | bv3        |         |          | 14,871  | 2  | ,001 |        |          |
|                     | bv3(1)     | -,373   | ,200     | 3,457   | 1  | ,063 | ,689   | ,465     |
|                     | bv3(2)     | ,384    | ,118     | 10,660  | 1  | ,001 | 1,468  | 1,166    |
|                     | VASTY2     |         |          | 212,522 | 35 | ,000 |        |          |
|                     | VASTY2(1)  | ,640    | ,343     | 3,486   | 1  | ,062 | 1,897  | ,969     |
|                     | VASTY2(2)  | ,754    | ,335     | 5,073   | 1  | ,024 | 2,125  | 1,103    |
|                     | VASTY2(3)  | ,675    | ,335     | 4,062   | 1  | ,044 | 1,964  | 1,019    |
|                     | VASTY2(4)  | ,061    | ,371     | ,027    | 1  | ,869 | 1,063  | ,513     |
|                     | VASTY2(5)  | -,812   | ,495     | 2,692   | 1  | ,101 | ,444   | ,168     |
|                     | VASTY2(6)  | -18,098 | 2097,303 | ,000    | 1  | ,993 | ,000   | ,000     |
|                     | VASTY2(7)  | 1,471   | ,313     | 22,056  | 1  | ,000 | 4,355  | 2,357    |
|                     | VASTY2(8)  | ,791    | ,332     | 5,695   | 1  | ,017 | 2,207  | 1,152    |
|                     | VASTY2(9)  | ,326    | ,362     | ,815    | 1  | ,367 | 1,386  | ,682     |
|                     | VASTY2(10) | ,771    | ,333     | 5,358   | 1  | ,021 | 2,162  | 1,125    |
|                     | VASTY2(11) | ,349    | ,357     | ,956    | 1  | ,328 | 1,418  | ,704     |
|                     | VASTY2(12) | 1,275   | ,315     | 16,424  | 1  | ,000 | 3,579  | 1,932    |
|                     | VASTY2(13) | 1,454   | ,310     | 22,079  | 1  | ,000 | 4,282  | 2,334    |
|                     | VASTY2(14) | ,743    | ,334     | 4,962   | 1  | ,026 | 2,103  | 1,093    |
|                     | VASTY2(15) | ,163    | ,369     | ,196    | 1  | ,658 | 1,178  | ,571     |
|                     | VASTY2(16) | -,951   | ,645     | 2,172   | 1  | ,141 | ,386   | ,109     |
|                     | VASTY2(17) | -17,984 | 2095,842 | ,000    | 1  | ,993 | ,000   | ,000     |
|                     | VASTY2(18) | -2,702  | 1,038    | 6,775   | 1  | ,009 | ,067   | ,009     |
|                     | VASTY2(19) | -2,457  | 1,043    | 5,543   | 1  | ,019 | ,086   | ,011     |
|                     | VASTY2(20) | -1,478  | ,643     | 5,290   | 1  | ,021 | ,228   | ,065     |
|                     | VASTY2(21) | ,533    | ,345     | 2,381   | 1  | ,123 | 1,704  | ,866     |
|                     | VASTY2(22) | 1,173   | ,321     | 13,375  | 1  | ,000 | 3,232  | 1,724    |
|                     | VASTY2(23) | ,529    | ,348     | 2,310   | 1  | ,129 | 1,697  | ,858     |
|                     | VASTY2(24) | 1,327   | ,313     | 18,027  | 1  | ,000 | 3,770  | 2,043    |
|                     | VASTY2(25) | -,216   | ,435     | ,245    | 1  | ,620 | ,806   | ,343     |
|                     | VASTY2(26) | -18,044 | 2347,402 | ,000    | 1  | ,994 | ,000   | ,000     |
|                     | VASTY2(27) | -18,066 | 2092,884 | ,000    | 1  | ,993 | ,000   | ,000     |
|                     | VASTY2(28) | -18,009 | 2673,450 | ,000    | 1  | ,995 | ,000   | ,000     |
|                     | VASTY2(29) | -18,039 | 2096,957 | ,000    | 1  | ,993 | ,000   | ,000     |
|                     | VASTY2(30) | -,070   | ,386     | ,033    | 1  | ,856 | ,932   | ,437     |
|                     | VASTY2(31) | -18,021 | 2089,024 | ,000    | 1  | ,993 | ,000   | ,000     |
|                     | VASTY2(32) | -1,949  | ,762     | 6,552   | 1  | ,010 | ,142   | ,032     |
|                     | VASTY2(33) | -2,660  | 1,039    | 6,561   | 1  | ,010 | ,070   | ,009     |
|                     | VASTY2(34) | ,444    | ,351     | 1,603   | 1  | ,206 | 1,559  | ,784     |
|                     | VASTY2(35) | -18,146 | 2254,372 | ,000    | 1  | ,994 | ,000   | ,000     |
|                     | weekday    |         |          | 2,992   | 6  | ,810 |        |          |
|                     | weekday(1) | ,017    | ,152     | ,012    | 1  | ,914 | 1,017  | ,754     |
|                     | weekday(2) | -,085   | ,156     | ,294    | 1  | ,588 | ,919   | ,677     |

## Variables in the Equation

|                     |            | 95% C.I... |
|---------------------|------------|------------|
|                     |            | Upper      |
| Step 1 <sup>a</sup> | bv3        |            |
|                     | bv3(1)     | 1,020      |
|                     | bv3(2)     | 1,849      |
|                     | VASTY2     |            |
|                     | VASTY2(1)  | 3,716      |
|                     | VASTY2(2)  | 4,094      |
|                     | VASTY2(3)  | 3,787      |
|                     | VASTY2(4)  | 2,202      |
|                     | VASTY2(5)  | 1,171      |
|                     | VASTY2(6)  | .          |
|                     | VASTY2(7)  | 8,048      |
|                     | VASTY2(8)  | 4,227      |
|                     | VASTY2(9)  | 2,816      |
|                     | VASTY2(10) | 4,152      |
|                     | VASTY2(11) | 2,856      |
|                     | VASTY2(12) | 6,632      |
|                     | VASTY2(13) | 7,854      |
|                     | VASTY2(14) | 4,043      |
|                     | VASTY2(15) | 2,428      |
|                     | VASTY2(16) | 1,369      |
|                     | VASTY2(17) | .          |
|                     | VASTY2(18) | ,513       |
|                     | VASTY2(19) | ,663       |
|                     | VASTY2(20) | ,804       |
|                     | VASTY2(21) | 3,352      |
|                     | VASTY2(22) | 6,061      |
|                     | VASTY2(23) | 3,357      |
|                     | VASTY2(24) | 6,956      |
|                     | VASTY2(25) | 1,892      |
|                     | VASTY2(26) | .          |
|                     | VASTY2(27) | .          |
|                     | VASTY2(28) | .          |
|                     | VASTY2(29) | .          |
|                     | VASTY2(30) | 1,987      |
|                     | VASTY2(31) | .          |
|                     | VASTY2(32) | ,633       |
|                     | VASTY2(33) | ,535       |
|                     | VASTY2(34) | 3,100      |
|                     | VASTY2(35) | .          |
|                     | weekday    |            |
|                     | weekday(1) | 1,371      |
|                     | weekday(2) | 1,248      |

Variables in the Equation

|            | B      | S.E. | Wald    | df | Sig. | Exp(B) | 95% C.I. |
|------------|--------|------|---------|----|------|--------|----------|
|            |        |      |         |    |      |        | Lower    |
| weekday(3) | ,027   | ,153 | ,031    | 1  | ,861 | 1,027  | ,761     |
| weekday(4) | ,012   | ,154 | ,006    | 1  | ,940 | 1,012  | ,748     |
| weekday(5) | -,077  | ,158 | ,240    | 1  | ,625 | ,926   | ,679     |
| weekday(6) | -,196  | ,162 | 1,476   | 1  | ,224 | ,822   | ,599     |
| holiday(1) | -,261  | ,256 | 1,042   | 1  | ,307 | ,770   | ,467     |
| season     |        |      | 7,191   | 4  | ,126 |        |          |
| season(1)  | ,034   | ,129 | ,070    | 1  | ,791 | 1,035  | ,804     |
| season(2)  | ,069   | ,118 | ,343    | 1  | ,558 | 1,072  | ,850     |
| season(3)  | -,076  | ,132 | ,332    | 1  | ,564 | ,927   | ,715     |
| season(4)  | -,292  | ,142 | 4,189   | 1  | ,041 | ,747   | ,565     |
| Constant   | -3,118 | ,300 | 108,255 | 1  | ,000 | ,044   |          |

Variables in the Equation

|            | 95% C.I. |
|------------|----------|
|            | Upper    |
| weekday(3) | 1,385    |
| weekday(4) | 1,368    |
| weekday(5) | 1,261    |
| weekday(6) | 1,128    |
| holiday(1) | 1,271    |
| season     |          |
| season(1)  | 1,331    |
| season(2)  | 1,351    |
| season(3)  | 1,201    |
| season(4)  | ,988     |
| Constant   |          |

a. Variable(s) entered on step 1: bv3, VASTY2, weekday, holiday, season.

LOGISTIC REGRESSION VARIABLES dod01

/METHOD=ENTER sv3 VASTY2 weekday holiday season

/CONTRAST (sv3)=Indicator(1)

/CONTRAST (VASTY2)=Indicator(1)

/CONTRAST (weekday)=Indicator(1)

/CONTRAST (holiday)=Indicator(1)

/CONTRAST (season)=Indicator(1)

/PRINT=CI(95)

/CRITERIA=PIN(0.05) POUT(0.10) ITERATE(20) CUT(0.5).

**Block 1: Method = Enter**

## Omnibus Tests of Model Coefficients

|        |       | Chi-square | df | Sig. |
|--------|-------|------------|----|------|
| Step 1 | Step  | 723,060    | 48 | ,000 |
|        | Block | 723,060    | 48 | ,000 |
|        | Model | 723,060    | 48 | ,000 |

## Model Summary

| Step | -2 Log likelihood    | Cox & Snell R Square | Nagelkerke R Square |
|------|----------------------|----------------------|---------------------|
| 1    | 4301,78 <sup>a</sup> | ,056                 | ,170                |

a. Estimation terminated at iteration number 20 because maximum iterations has been reached. Final solution cannot be found.

Classification Table<sup>a</sup>

| Observed           |                             | Predicted                   |                      |                    |       |
|--------------------|-----------------------------|-----------------------------|----------------------|--------------------|-------|
|                    |                             | dod01 dödsfall ja eller nej |                      | Percentage Correct |       |
|                    |                             | 0 inget dödsfall            | 1 minst ett dödsfall |                    |       |
| Step 1             | dod01 dödsfall ja eller nej | 0 inget dödsfall            | 11839                | 0                  | 100,0 |
|                    |                             | 1 minst ett dödsfall        | 636                  | 0                  | ,0    |
| Overall Percentage |                             |                             |                      |                    | 94,9  |

a. The cut value is ,500

## Variables in the Equation

|                     |            | B       | S.E.     | Wald    | df | Sig. | Exp(B) | 95% C.I. |
|---------------------|------------|---------|----------|---------|----|------|--------|----------|
|                     |            |         |          |         |    |      |        | Lower    |
| Step 1 <sup>a</sup> | sv3        |         |          | 6,934   | 2  | ,031 |        |          |
|                     | sv3(1)     | -,156   | ,117     | 1,769   | 1  | ,184 | ,856   | ,680     |
|                     | sv3(2)     | ,184    | ,111     | 2,731   | 1  | ,098 | 1,202  | ,966     |
|                     | VASTY2     |         |          | 219,392 | 35 | ,000 |        |          |
|                     | VASTY2(1)  | ,570    | ,344     | 2,754   | 1  | ,097 | 1,769  | ,902     |
|                     | VASTY2(2)  | ,653    | ,338     | 3,725   | 1  | ,054 | 1,921  | ,990     |
|                     | VASTY2(3)  | ,885    | ,332     | 7,124   | 1  | ,008 | 2,423  | 1,265    |
|                     | VASTY2(4)  | ,232    | ,369     | ,393    | 1  | ,531 | 1,261  | ,611     |
|                     | VASTY2(5)  | -,669   | ,496     | 1,823   | 1  | ,177 | ,512   | ,194     |
|                     | VASTY2(6)  | -18,130 | 2102,608 | ,000    | 1  | ,993 | ,000   | ,000     |
|                     | VASTY2(7)  | 1,740   | ,306     | 32,412  | 1  | ,000 | 5,700  | 3,131    |
|                     | VASTY2(8)  | ,913    | ,332     | 7,550   | 1  | ,006 | 2,492  | 1,299    |
|                     | VASTY2(9)  | ,397    | ,361     | 1,212   | 1  | ,271 | 1,488  | ,733     |
|                     | VASTY2(10) | ,665    | ,338     | 3,871   | 1  | ,049 | 1,945  | 1,003    |
|                     | VASTY2(11) | ,381    | ,357     | 1,140   | 1  | ,286 | 1,464  | ,727     |
|                     | VASTY2(12) | 1,191   | ,318     | 14,016  | 1  | ,000 | 3,292  | 1,764    |
|                     | VASTY2(13) | 1,403   | ,315     | 19,868  | 1  | ,000 | 4,068  | 2,195    |
|                     | VASTY2(14) | ,722    | ,335     | 4,639   | 1  | ,031 | 2,058  | 1,067    |
|                     | VASTY2(15) | ,076    | ,373     | ,042    | 1  | ,838 | 1,079  | ,520     |
|                     | VASTY2(16) | -,895   | ,644     | 1,928   | 1  | ,165 | ,409   | ,116     |
|                     | VASTY2(17) | -17,933 | 2097,697 | ,000    | 1  | ,993 | ,000   | ,000     |
|                     | VASTY2(18) | -2,506  | 1,041    | 5,796   | 1  | ,016 | ,082   | ,011     |
|                     | VASTY2(19) | -2,513  | 1,041    | 5,825   | 1  | ,016 | ,081   | ,011     |
|                     | VASTY2(20) | -1,453  | ,642     | 5,116   | 1  | ,024 | ,234   | ,066     |
|                     | VASTY2(21) | ,617    | ,346     | 3,191   | 1  | ,074 | 1,854  | ,942     |
|                     | VASTY2(22) | 1,126   | ,320     | 12,354  | 1  | ,000 | 3,082  | 1,645    |
|                     | VASTY2(23) | ,540    | ,348     | 2,406   | 1  | ,121 | 1,716  | ,867     |
|                     | VASTY2(24) | 1,407   | ,311     | 20,476  | 1  | ,000 | 4,085  | 2,221    |
|                     | VASTY2(25) | -,166   | ,436     | ,146    | 1  | ,703 | ,847   | ,360     |
|                     | VASTY2(26) | -18,008 | 2350,172 | ,000    | 1  | ,994 | ,000   | ,000     |
|                     | VASTY2(27) | -18,089 | 2096,319 | ,000    | 1  | ,993 | ,000   | ,000     |
|                     | VASTY2(28) | -18,119 | 2675,663 | ,000    | 1  | ,995 | ,000   | ,000     |
|                     | VASTY2(29) | -18,165 | 2098,433 | ,000    | 1  | ,993 | ,000   | ,000     |
|                     | VASTY2(30) | ,060    | ,387     | ,024    | 1  | ,877 | 1,062  | ,497     |
|                     | VASTY2(31) | -17,843 | 2098,197 | ,000    | 1  | ,993 | ,000   | ,000     |
|                     | VASTY2(32) | -1,813  | ,764     | 5,625   | 1  | ,018 | ,163   | ,036     |
|                     | VASTY2(33) | -2,519  | 1,041    | 5,854   | 1  | ,016 | ,081   | ,010     |
|                     | VASTY2(34) | ,474    | ,351     | 1,827   | 1  | ,176 | 1,606  | ,808     |
|                     | VASTY2(35) | -18,012 | 2257,675 | ,000    | 1  | ,994 | ,000   | ,000     |
|                     | weekday    |         |          | 3,391   | 6  | ,758 |        |          |
|                     | weekday(1) | ,021    | ,152     | ,020    | 1  | ,888 | 1,022  | ,758     |
|                     | weekday(2) | -,071   | ,156     | ,205    | 1  | ,651 | ,932   | ,686     |

Variables in the Equation

|                     |            | 95% C.I... |
|---------------------|------------|------------|
|                     |            | Upper      |
| Step 1 <sup>a</sup> | sv3        |            |
|                     | sv3(1)     | 1,077      |
|                     | sv3(2)     | 1,494      |
|                     | VASTY2     |            |
|                     | VASTY2(1)  | 3,470      |
|                     | VASTY2(2)  | 3,727      |
|                     | VASTY2(3)  | 4,642      |
|                     | VASTY2(4)  | 2,600      |
|                     | VASTY2(5)  | 1,353      |
|                     | VASTY2(6)  | .          |
|                     | VASTY2(7)  | 10,378     |
|                     | VASTY2(8)  | 4,780      |
|                     | VASTY2(9)  | 3,018      |
|                     | VASTY2(10) | 3,774      |
|                     | VASTY2(11) | 2,947      |
|                     | VASTY2(12) | 6,142      |
|                     | VASTY2(13) | 7,539      |
|                     | VASTY2(14) | 3,968      |
|                     | VASTY2(15) | 2,241      |
|                     | VASTY2(16) | 1,445      |
|                     | VASTY2(17) | .          |
|                     | VASTY2(18) | ,628       |
|                     | VASTY2(19) | ,624       |
|                     | VASTY2(20) | ,824       |
|                     | VASTY2(21) | 3,651      |
|                     | VASTY2(22) | 5,775      |
|                     | VASTY2(23) | 3,393      |
|                     | VASTY2(24) | 7,516      |
|                     | VASTY2(25) | 1,990      |
|                     | VASTY2(26) | .          |
|                     | VASTY2(27) | .          |
|                     | VASTY2(28) | .          |
|                     | VASTY2(29) | .          |
|                     | VASTY2(30) | 2,267      |
|                     | VASTY2(31) | .          |
|                     | VASTY2(32) | ,730       |
|                     | VASTY2(33) | ,620       |
|                     | VASTY2(34) | 3,194      |
|                     | VASTY2(35) | .          |
|                     | weekday    |            |
|                     | weekday(1) | 1,377      |
|                     | weekday(2) | 1,265      |

Peer review only

Variables in the Equation

|            | B      | S.E. | Wald    | df | Sig. | Exp(B) | 95% C.I. |
|------------|--------|------|---------|----|------|--------|----------|
|            |        |      |         |    |      |        | Lower    |
| weekday(3) | ,045   | ,153 | ,085    | 1  | ,770 | 1,046  | ,775     |
| weekday(4) | ,025   | ,154 | ,027    | 1  | ,870 | 1,026  | ,758     |
| weekday(5) | -,074  | ,158 | ,220    | 1  | ,639 | ,929   | ,681     |
| weekday(6) | -,202  | ,161 | 1,561   | 1  | ,212 | ,817   | ,596     |
| holiday(1) | -,258  | ,256 | 1,016   | 1  | ,313 | ,772   | ,468     |
| season     |        |      | 6,798   | 4  | ,147 |        |          |
| season(1)  | ,025   | ,129 | ,038    | 1  | ,846 | 1,025  | ,797     |
| season(2)  | ,045   | ,118 | ,142    | 1  | ,706 | 1,046  | ,830     |
| season(3)  | -,079  | ,132 | ,352    | 1  | ,553 | ,924   | ,713     |
| season(4)  | -,300  | ,142 | 4,435   | 1  | ,035 | ,741   | ,561     |
| Constant   | -3,144 | ,304 | 107,049 | 1  | ,000 | ,043   |          |

Variables in the Equation

|            | 95% C.I. |
|------------|----------|
|            | Upper    |
| weekday(3) | 1,410    |
| weekday(4) | 1,388    |
| weekday(5) | 1,266    |
| weekday(6) | 1,122    |
| holiday(1) | 1,276    |
| season     |          |
| season(1)  | 1,319    |
| season(2)  | 1,318    |
| season(3)  | 1,198    |
| season(4)  | ,979     |
| Constant   |          |

a. Variable(s) entered on step 1: sv3, VASTY2, weekday, holiday, season.

LOGISTIC REGRESSION VARIABLES dod01

/METHOD=ENTER sv5 VASTY2 weekday holiday season

/CONTRAST (sv5)=Indicator(1)

/CONTRAST (VASTY2)=Indicator(1)

/CONTRAST (weekday)=Indicator(1)

/CONTRAST (holiday)=Indicator(1)

/CONTRAST (season)=Indicator(1)

/PRINT=CI(95)

/CRITERIA=PIN(0.05) POUT(0.10) ITERATE(20) CUT(0.5).

**Block 1: Method = Enter**



## Omnibus Tests of Model Coefficients

|        |       | Chi-square | df | Sig. |
|--------|-------|------------|----|------|
| Step 1 | Step  | 723,161    | 50 | ,000 |
|        | Block | 723,161    | 50 | ,000 |
|        | Model | 723,161    | 50 | ,000 |

## Model Summary

| Step | -2 Log likelihood    | Cox & Snell R Square | Nagelkerke R Square |
|------|----------------------|----------------------|---------------------|
| 1    | 4301,68 <sup>a</sup> | ,056                 | ,170                |

a. Estimation terminated at iteration number 20 because maximum iterations has been reached. Final solution cannot be found.

Classification Table<sup>a</sup>

|                    |                             | Predicted                   |                      |                    |       |
|--------------------|-----------------------------|-----------------------------|----------------------|--------------------|-------|
|                    |                             | dod01 dödsfall ja eller nej |                      | Percentage Correct |       |
| Observed           |                             | 0 inget dödsfall            | 1 minst ett dödsfall |                    |       |
| Step 1             | dod01 dödsfall ja eller nej | 0 inget dödsfall            | 11839                | 0                  | 100,0 |
|                    |                             | 1 minst ett dödsfall        | 636                  | 0                  | ,0    |
| Overall Percentage |                             |                             |                      |                    | 94,9  |

a. The cut value is ,500

## Variables in the Equation

|                     |            | B       | S.E.     | Wald    | df | Sig. | Exp(B) | 95% C.I. |
|---------------------|------------|---------|----------|---------|----|------|--------|----------|
|                     |            |         |          |         |    |      |        | Lower    |
| Step 1 <sup>a</sup> | sv5        |         |          | 6,999   | 4  | ,136 |        |          |
|                     | sv5(1)     | -,191   | ,154     | 1,547   | 1  | ,214 | ,826   | ,611     |
|                     | sv5(2)     | -,064   | ,145     | ,193    | 1  | ,660 | ,938   | ,706     |
|                     | sv5(3)     | ,102    | ,130     | ,614    | 1  | ,433 | 1,107  | ,859     |
|                     | sv5(4)     | ,239    | ,147     | 2,620   | 1  | ,106 | 1,269  | ,951     |
|                     | VASTY2     |         |          | 214,674 | 35 | ,000 |        |          |
|                     | VASTY2(1)  | ,571    | ,344     | 2,759   | 1  | ,097 | 1,770  | ,902     |
|                     | VASTY2(2)  | ,629    | ,341     | 3,406   | 1  | ,065 | 1,876  | ,962     |
|                     | VASTY2(3)  | ,877    | ,332     | 6,990   | 1  | ,008 | 2,403  | 1,255    |
|                     | VASTY2(4)  | ,234    | ,369     | ,402    | 1  | ,526 | 1,264  | ,613     |
|                     | VASTY2(5)  | -,672   | ,496     | 1,835   | 1  | ,176 | ,511   | ,193     |
|                     | VASTY2(6)  | -18,173 | 2102,360 | ,000    | 1  | ,993 | ,000   | ,000     |
|                     | VASTY2(7)  | 1,734   | ,306     | 32,192  | 1  | ,000 | 5,664  | 3,112    |
|                     | VASTY2(8)  | ,909    | ,333     | 7,474   | 1  | ,006 | 2,483  | 1,294    |
|                     | VASTY2(9)  | ,396    | ,361     | 1,201   | 1  | ,273 | 1,485  | ,732     |
|                     | VASTY2(10) | ,637    | ,342     | 3,477   | 1  | ,062 | 1,891  | ,968     |
|                     | VASTY2(11) | ,375    | ,357     | 1,101   | 1  | ,294 | 1,454  | ,722     |
|                     | VASTY2(12) | 1,180   | ,319     | 13,652  | 1  | ,000 | 3,253  | 1,740    |
|                     | VASTY2(13) | 1,374   | ,319     | 18,547  | 1  | ,000 | 3,950  | 2,114    |
|                     | VASTY2(14) | ,708    | ,336     | 4,426   | 1  | ,035 | 2,029  | 1,050    |
|                     | VASTY2(15) | ,059    | ,375     | ,025    | 1  | ,874 | 1,061  | ,509     |
|                     | VASTY2(16) | -,907   | ,645     | 1,975   | 1  | ,160 | ,404   | ,114     |
|                     | VASTY2(17) | -17,933 | 2097,524 | ,000    | 1  | ,993 | ,000   | ,000     |
|                     | VASTY2(18) | -2,476  | 1,044    | 5,627   | 1  | ,018 | ,084   | ,011     |
|                     | VASTY2(19) | -2,480  | 1,044    | 5,640   | 1  | ,018 | ,084   | ,011     |
|                     | VASTY2(20) | -1,475  | ,644     | 5,253   | 1  | ,022 | ,229   | ,065     |
|                     | VASTY2(21) | ,612    | ,346     | 3,130   | 1  | ,077 | 1,844  | ,936     |
|                     | VASTY2(22) | 1,123   | ,320     | 12,297  | 1  | ,000 | 3,075  | 1,641    |
|                     | VASTY2(23) | ,540    | ,348     | 2,405   | 1  | ,121 | 1,716  | ,867     |
|                     | VASTY2(24) | 1,396   | ,312     | 20,084  | 1  | ,000 | 4,039  | 2,194    |
|                     | VASTY2(25) | -,166   | ,436     | ,145    | 1  | ,703 | ,847   | ,360     |
|                     | VASTY2(26) | -18,008 | 2350,383 | ,000    | 1  | ,994 | ,000   | ,000     |
|                     | VASTY2(27) | -18,106 | 2095,745 | ,000    | 1  | ,993 | ,000   | ,000     |
|                     | VASTY2(28) | -18,169 | 2675,548 | ,000    | 1  | ,995 | ,000   | ,000     |
|                     | VASTY2(29) | -18,220 | 2098,403 | ,000    | 1  | ,993 | ,000   | ,000     |
|                     | VASTY2(30) | ,061    | ,387     | ,025    | 1  | ,876 | 1,063  | ,497     |
|                     | VASTY2(31) | -17,824 | 2097,875 | ,000    | 1  | ,993 | ,000   | ,000     |
|                     | VASTY2(32) | -1,784  | ,768     | 5,395   | 1  | ,020 | ,168   | ,037     |
|                     | VASTY2(33) | -2,486  | 1,044    | 5,667   | 1  | ,017 | ,083   | ,011     |
|                     | VASTY2(34) | ,470    | ,351     | 1,794   | 1  | ,180 | 1,600  | ,804     |
|                     | VASTY2(35) | -18,001 | 2257,506 | ,000    | 1  | ,994 | ,000   | ,000     |
|                     | weekday    |         |          | 3,314   | 6  | ,769 |        |          |

Variables in the Equation

|                     |            | 95% C.I... |
|---------------------|------------|------------|
|                     |            | Upper      |
| Step 1 <sup>a</sup> | sv5        |            |
|                     | sv5(1)     | 1,116      |
|                     | sv5(2)     | 1,247      |
|                     | sv5(3)     | 1,427      |
|                     | sv5(4)     | 1,694      |
|                     | VASTY2     |            |
|                     | VASTY2(1)  | 3,474      |
|                     | VASTY2(2)  | 3,658      |
|                     | VASTY2(3)  | 4,601      |
|                     | VASTY2(4)  | 2,606      |
|                     | VASTY2(5)  | 1,350      |
|                     | VASTY2(6)  | .          |
|                     | VASTY2(7)  | 10,311     |
|                     | VASTY2(8)  | 4,766      |
|                     | VASTY2(9)  | 3,013      |
|                     | VASTY2(10) | 3,695      |
|                     | VASTY2(11) | 2,928      |
|                     | VASTY2(12) | 6,082      |
|                     | VASTY2(13) | 7,380      |
|                     | VASTY2(14) | 3,923      |
|                     | VASTY2(15) | 2,212      |
|                     | VASTY2(16) | 1,430      |
|                     | VASTY2(17) | .          |
|                     | VASTY2(18) | ,650       |
|                     | VASTY2(19) | ,648       |
|                     | VASTY2(20) | ,808       |
|                     | VASTY2(21) | 3,631      |
|                     | VASTY2(22) | 5,761      |
|                     | VASTY2(23) | 3,395      |
|                     | VASTY2(24) | 7,439      |
|                     | VASTY2(25) | 1,992      |
|                     | VASTY2(26) | .          |
|                     | VASTY2(27) | .          |
|                     | VASTY2(28) | .          |
|                     | VASTY2(29) | .          |
|                     | VASTY2(30) | 2,270      |
|                     | VASTY2(31) | .          |
|                     | VASTY2(32) | ,757       |
|                     | VASTY2(33) | ,645       |
|                     | VASTY2(34) | 3,180      |
|                     | VASTY2(35) | .          |
|                     | weekday    |            |

Peer review only

Variables in the Equation

|            | B      | S.E. | Wald    | df | Sig. | Exp(B) | 95% C.I. |
|------------|--------|------|---------|----|------|--------|----------|
|            |        |      |         |    |      |        | Lower    |
| weekday(1) | ,025   | ,152 | ,026    | 1  | ,871 | 1,025  | ,760     |
| weekday(2) | -,070  | ,156 | ,201    | 1  | ,654 | ,932   | ,687     |
| weekday(3) | ,043   | ,153 | ,079    | 1  | ,779 | 1,044  | ,774     |
| weekday(4) | ,028   | ,155 | ,033    | 1  | ,856 | 1,028  | ,760     |
| weekday(5) | -,065  | ,158 | ,171    | 1  | ,680 | ,937   | ,687     |
| weekday(6) | -,200  | ,162 | 1,526   | 1  | ,217 | ,819   | ,597     |
| holiday(1) | -,254  | ,256 | ,981    | 1  | ,322 | ,776   | ,470     |
| season     |        |      | 6,843   | 4  | ,144 |        |          |
| season(1)  | ,028   | ,129 | ,049    | 1  | ,825 | 1,029  | ,800     |
| season(2)  | ,053   | ,119 | ,203    | 1  | ,653 | 1,055  | ,836     |
| season(3)  | -,080  | ,133 | ,362    | 1  | ,547 | ,923   | ,712     |
| season(4)  | -,294  | ,142 | 4,264   | 1  | ,039 | ,745   | ,564     |
| Constant   | -3,148 | ,311 | 102,700 | 1  | ,000 | ,043   |          |

Variables in the Equation

|            | 95% C.I. |
|------------|----------|
|            | Upper    |
| weekday(1) | 1,382    |
| weekday(2) | 1,266    |
| weekday(3) | 1,408    |
| weekday(4) | 1,392    |
| weekday(5) | 1,277    |
| weekday(6) | 1,124    |
| holiday(1) | 1,282    |
| season     |          |
| season(1)  | 1,324    |
| season(2)  | 1,331    |
| season(3)  | 1,197    |
| season(4)  | ,985     |
| Constant   |          |

a. Variable(s) entered on step 1: sv5, VASTY2, weekday, holiday, season.

LOGISTIC REGRESSION VARIABLES dod01

/METHOD=ENTER sv7 VASTY2 weekday holiday season

/CONTRAST (sv7)=Indicator(1)

/CONTRAST (VASTY2)=Indicator(1)

/CONTRAST (weekday)=Indicator(1)

/CONTRAST (holiday)=Indicator(1)

/CONTRAST (season)=Indicator(1)

1  
2  
3 /PRINT=CI(95)

4 /CRITERIA=PIN(0.05) POUT(0.10) ITERATE(20) CUT(0.5).

5  
6  
7 **Block 1: Method = Enter**

8  
9 **Omnibus Tests of Model Coefficients**

|        |       | Chi-square | df | Sig. |
|--------|-------|------------|----|------|
| Step 1 | Step  | 730,384    | 52 | ,000 |
|        | Block | 730,384    | 52 | ,000 |
|        | Model | 730,384    | 52 | ,000 |

10  
11  
12  
13  
14  
15  
16  
17  
18 **Model Summary**

| Step | -2 Log likelihood    | Cox & Snell R Square | Nagelkerke R Square |
|------|----------------------|----------------------|---------------------|
| 1    | 4294,46 <sup>a</sup> | ,057                 | ,172                |

19  
20  
21  
22  
23  
24 a. Estimation terminated at iteration number 20 because maximum iterations has been reached. Final  
25 solution cannot be found.

26  
27  
28  
29  
30 **Classification Table<sup>a</sup>**

|                    |                             | Predicted                   |                      |                    |       |
|--------------------|-----------------------------|-----------------------------|----------------------|--------------------|-------|
|                    |                             | dod01 dödsfall ja eller nej |                      | Percentage Correct |       |
| Observed           |                             | 0 inget dödsfall            | 1 minst ett dödsfall |                    |       |
| Step 1             | dod01 dödsfall ja eller nej | 0 inget dödsfall            | 11839                | 0                  | 100,0 |
|                    |                             | 1 minst ett dödsfall        | 636                  | 0                  | ,0    |
| Overall Percentage |                             |                             |                      |                    | 94,9  |

31  
32  
33  
34  
35  
36  
37  
38  
39  
40  
41  
42 a. The cut value is ,500

## Variables in the Equation

|                     |            | B       | S.E.     | Wald    | df | Sig. | Exp(B) | 95% C.I. |
|---------------------|------------|---------|----------|---------|----|------|--------|----------|
|                     |            |         |          |         |    |      |        | Lower    |
| Step 1 <sup>a</sup> | sv7        |         |          | 13,534  | 6  | ,035 |        |          |
|                     | sv7(1)     | -,349   | ,191     | 3,334   | 1  | ,068 | ,705   | ,485     |
|                     | sv7(2)     | ,163    | ,169     | ,928    | 1  | ,335 | 1,177  | ,845     |
|                     | sv7(3)     | -,006   | ,169     | ,001    | 1  | ,972 | ,994   | ,713     |
|                     | sv7(4)     | ,145    | ,155     | ,868    | 1  | ,352 | 1,156  | ,852     |
|                     | sv7(5)     | ,234    | ,152     | 2,376   | 1  | ,123 | 1,263  | ,938     |
|                     | sv7(6)     | ,349    | ,177     | 3,869   | 1  | ,049 | 1,417  | 1,001    |
|                     | VASTY2     |         |          | 207,524 | 35 | ,000 |        |          |
|                     | VASTY2(1)  | ,570    | ,344     | 2,744   | 1  | ,098 | 1,769  | ,901     |
|                     | VASTY2(2)  | ,614    | ,342     | 3,227   | 1  | ,072 | 1,847  | ,946     |
|                     | VASTY2(3)  | ,867    | ,332     | 6,820   | 1  | ,009 | 2,379  | 1,241    |
|                     | VASTY2(4)  | ,221    | ,370     | ,358    | 1  | ,550 | 1,247  | ,604     |
|                     | VASTY2(5)  | -,652   | ,496     | 1,730   | 1  | ,188 | ,521   | ,197     |
|                     | VASTY2(6)  | -18,215 | 2101,929 | ,000    | 1  | ,993 | ,000   | ,000     |
|                     | VASTY2(7)  | 1,745   | ,306     | 32,575  | 1  | ,000 | 5,727  | 3,145    |
|                     | VASTY2(8)  | ,896    | ,333     | 7,243   | 1  | ,007 | 2,450  | 1,276    |
|                     | VASTY2(9)  | ,400    | ,361     | 1,225   | 1  | ,268 | 1,491  | ,735     |
|                     | VASTY2(10) | ,617    | ,343     | 3,243   | 1  | ,072 | 1,853  | ,947     |
|                     | VASTY2(11) | ,399    | ,357     | 1,248   | 1  | ,264 | 1,491  | ,740     |
|                     | VASTY2(12) | 1,170   | ,319     | 13,436  | 1  | ,000 | 3,222  | 1,723    |
|                     | VASTY2(13) | 1,352   | ,320     | 17,837  | 1  | ,000 | 3,865  | 2,064    |
|                     | VASTY2(14) | ,701    | ,337     | 4,327   | 1  | ,038 | 2,015  | 1,041    |
|                     | VASTY2(15) | ,039    | ,376     | ,011    | 1  | ,918 | 1,039  | ,497     |
|                     | VASTY2(16) | -,908   | ,646     | 1,977   | 1  | ,160 | ,403   | ,114     |
|                     | VASTY2(17) | -17,931 | 2092,993 | ,000    | 1  | ,993 | ,000   | ,000     |
|                     | VASTY2(18) | -2,287  | 1,047    | 4,773   | 1  | ,029 | ,102   | ,013     |
|                     | VASTY2(19) | -2,262  | 1,049    | 4,654   | 1  | ,031 | ,104   | ,013     |
|                     | VASTY2(20) | -1,483  | ,644     | 5,296   | 1  | ,021 | ,227   | ,064     |
|                     | VASTY2(21) | ,615    | ,346     | 3,163   | 1  | ,075 | 1,850  | ,939     |
|                     | VASTY2(22) | 1,118   | ,320     | 12,169  | 1  | ,000 | 3,058  | 1,632    |
|                     | VASTY2(23) | ,554    | ,348     | 2,533   | 1  | ,112 | 1,741  | ,880     |
|                     | VASTY2(24) | 1,386   | ,312     | 19,781  | 1  | ,000 | 4,000  | 2,172    |
|                     | VASTY2(25) | -,156   | ,437     | ,128    | 1  | ,720 | ,855   | ,364     |
|                     | VASTY2(26) | -18,002 | 2347,147 | ,000    | 1  | ,994 | ,000   | ,000     |
|                     | VASTY2(27) | -18,128 | 2094,181 | ,000    | 1  | ,993 | ,000   | ,000     |
|                     | VASTY2(28) | -18,210 | 2675,280 | ,000    | 1  | ,995 | ,000   | ,000     |
|                     | VASTY2(29) | -18,268 | 2098,326 | ,000    | 1  | ,993 | ,000   | ,000     |
|                     | VASTY2(30) | ,053    | ,387     | ,018    | 1  | ,892 | 1,054  | ,493     |
|                     | VASTY2(31) | -17,716 | 2092,065 | ,000    | 1  | ,993 | ,000   | ,000     |
|                     | VASTY2(32) | -1,597  | ,772     | 4,278   | 1  | ,039 | ,203   | ,045     |
|                     | VASTY2(33) | -2,268  | 1,049    | 4,677   | 1  | ,031 | ,103   | ,013     |
|                     | VASTY2(34) | ,465    | ,351     | 1,755   | 1  | ,185 | 1,592  | ,800     |

## Variables in the Equation

|                     |            | 95% C.I... |
|---------------------|------------|------------|
|                     |            | Upper      |
| Step 1 <sup>a</sup> | sv7        |            |
|                     | sv7(1)     | 1,026      |
|                     | sv7(2)     | 1,639      |
|                     | sv7(3)     | 1,385      |
|                     | sv7(4)     | 1,567      |
|                     | sv7(5)     | 1,701      |
|                     | sv7(6)     | 2,005      |
|                     | VASTY2     |            |
|                     | VASTY2(1)  | 3,473      |
|                     | VASTY2(2)  | 3,608      |
|                     | VASTY2(3)  | 4,559      |
|                     | VASTY2(4)  | 2,574      |
|                     | VASTY2(5)  | 1,377      |
|                     | VASTY2(6)  | .          |
|                     | VASTY2(7)  | 10,429     |
|                     | VASTY2(8)  | 4,705      |
|                     | VASTY2(9)  | 3,027      |
|                     | VASTY2(10) | 3,627      |
|                     | VASTY2(11) | 3,004      |
|                     | VASTY2(12) | 6,022      |
|                     | VASTY2(13) | 7,238      |
|                     | VASTY2(14) | 3,898      |
|                     | VASTY2(15) | 2,172      |
|                     | VASTY2(16) | 1,430      |
|                     | VASTY2(17) | .          |
|                     | VASTY2(18) | ,790       |
|                     | VASTY2(19) | ,813       |
|                     | VASTY2(20) | ,803       |
|                     | VASTY2(21) | 3,643      |
|                     | VASTY2(22) | 5,730      |
|                     | VASTY2(23) | 3,445      |
|                     | VASTY2(24) | 7,370      |
|                     | VASTY2(25) | 2,012      |
|                     | VASTY2(26) | .          |
|                     | VASTY2(27) | .          |
|                     | VASTY2(28) | .          |
|                     | VASTY2(29) | .          |
|                     | VASTY2(30) | 2,252      |
|                     | VASTY2(31) | .          |
|                     | VASTY2(32) | ,920       |
|                     | VASTY2(33) | ,808       |
|                     | VASTY2(34) | 3,166      |

Variables in the Equation

|            | B       | S.E.     | Wald    | df | Sig. | Exp(B) | 95% C.I. |
|------------|---------|----------|---------|----|------|--------|----------|
|            |         |          |         |    |      |        | Lower    |
| VASTY2(35) | -17,980 | 2252,756 | ,000    | 1  | ,994 | ,000   | ,000     |
| weekday    |         |          | 3,267   | 6  | ,775 |        |          |
| weekday(1) | ,024    | ,152     | ,025    | 1  | ,874 | 1,025  | ,760     |
| weekday(2) | -,069   | ,156     | ,194    | 1  | ,659 | ,933   | ,687     |
| weekday(3) | ,046    | ,153     | ,091    | 1  | ,763 | 1,047  | ,776     |
| weekday(4) | ,025    | ,155     | ,026    | 1  | ,873 | 1,025  | ,757     |
| weekday(5) | -,061   | ,158     | ,146    | 1  | ,702 | ,941   | ,690     |
| weekday(6) | -,199   | ,162     | 1,515   | 1  | ,218 | ,820   | ,597     |
| holiday(1) | -,243   | ,256     | ,898    | 1  | ,343 | ,784   | ,475     |
| season     |         |          | 7,242   | 4  | ,124 |        |          |
| season(1)  | ,032    | ,129     | ,062    | 1  | ,803 | 1,033  | ,802     |
| season(2)  | ,068    | ,119     | ,329    | 1  | ,566 | 1,071  | ,848     |
| season(3)  | -,084   | ,133     | ,406    | 1  | ,524 | ,919   | ,709     |
| season(4)  | -,292   | ,142     | 4,206   | 1  | ,040 | ,747   | ,565     |
| Constant   | -3,212  | ,317     | 102,895 | 1  | ,000 | ,040   |          |

Variables in the Equation

|            | 95% C.I. |
|------------|----------|
|            | Upper    |
| VASTY2(35) | .        |
| weekday    |          |
| weekday(1) | 1,381    |
| weekday(2) | 1,268    |
| weekday(3) | 1,413    |
| weekday(4) | 1,388    |
| weekday(5) | 1,284    |
| weekday(6) | 1,125    |
| holiday(1) | 1,296    |
| season     |          |
| season(1)  | 1,329    |
| season(2)  | 1,351    |
| season(3)  | 1,192    |
| season(4)  | ,987     |
| Constant   |          |

a. Variable(s) entered on step 1: sv7, VASTY2, weekday, holiday, season.



STROBE Statement—checklist of items that should be included in reports of observational studies

|                              | Item No | Recommendation                                                                                                                                                                                                                |
|------------------------------|---------|-------------------------------------------------------------------------------------------------------------------------------------------------------------------------------------------------------------------------------|
| <b>Title and abstract</b>    | 1       | (a) Indicate the study's design with a commonly used term in the title or the abstract<br>(b) Provide in the abstract an informative and balanced summary of what was done and what was found<br><a href="#">Page 2 and 3</a> |
| <b>Introduction</b>          |         |                                                                                                                                                                                                                               |
| Background/rationale         | 2       | Explain the scientific background and rationale for the investigation etc. <a href="#">Page 3-4</a>                                                                                                                           |
| Objectives                   | 3       | State specific objectives, including any prespecified hypotheses. <a href="#">Page 4</a>                                                                                                                                      |
| <b>Methods</b>               |         |                                                                                                                                                                                                                               |
| Study design                 | 4       | Present key elements of study design early in the paper, <a href="#">page 4</a>                                                                                                                                               |
| Setting                      | 5       | Describe the setting, locations, and relevant dates, including periods of recruitment, exposure, follow-up, and data collection, <a href="#">page 4-5</a>                                                                     |
| Participants                 | 6       | <a href="#">Page 5</a>                                                                                                                                                                                                        |
| Variables                    | 7       | Clearly define all outcomes, exposures, predictors, potential confounders, and effect modifiers. Give diagnostic criteria, if applicable, <a href="#">page 6</a>                                                              |
| Data sources/<br>measurement | 8*      | For each variable of interest, give sources of data and details of methods of assessment (measurement). Describe comparability of assessment methods if there is more than one group, <a href="#">page 6-7</a>                |
| Bias                         | 9       | Describe any efforts to address potential sources of bias, <a href="#">page 6-7</a>                                                                                                                                           |
| Study size                   | 10      | Explain how the study size was arrived at, <a href="#">page 6-7</a>                                                                                                                                                           |
| Quantitative variables       | 11      | Explain how quantitative variables were handled in the analyses. If applicable, describe which groupings were chosen and why, <a href="#">page 6-7</a>                                                                        |
| Statistical methods          | 12      | <a href="#">Page 6-7</a>                                                                                                                                                                                                      |

Continued on next page

| <b>Results</b>           |     |                                                                                                                                                                                                                                                                                                                                                                                                                            |
|--------------------------|-----|----------------------------------------------------------------------------------------------------------------------------------------------------------------------------------------------------------------------------------------------------------------------------------------------------------------------------------------------------------------------------------------------------------------------------|
| Participants             | 13* | (a) Report numbers of individuals at each stage of study—eg numbers potentially eligible, examined for eligibility, confirmed eligible, included in the study, completing follow-up, and analysed<br>(b) Give reasons for non-participation at each stage<br>(c) Consider use of a flow diagram                                                                                                                            |
| Descriptive data         | 14* | (a) Give characteristics of study participants (eg demographic, clinical, social) and information on exposures and potential confounders<br>(b) Indicate number of participants with missing data for each variable of interest <b>p 7-9 table 1</b><br>(c) <i>Cohort study</i> —Summarise follow-up time (eg, average and total amount)                                                                                   |
| Outcome data             | 15* | <i>Cohort study</i> —Report numbers of outcome events or summary measures over time<br><i>Case-control study</i> —Report numbers in each exposure category, or summary measures of exposure<br><i>Cross-sectional study</i> —Report numbers of outcome events or summary measures <b>p 7-9, table 1-2</b>                                                                                                                  |
| Main results             | 16  | (a) Give unadjusted estimates and, if applicable, confounder-adjusted estimates and their precision (eg, 95% confidence interval). Make clear which confounders were adjusted for and why they were included <b>p 7-9</b><br>(b) Report category boundaries when continuous variables were categorized<br>(c) If relevant, consider translating estimates of relative risk into absolute risk for a meaningful time period |
| Other analyses           | 17  | Report other analyses done—eg analyses of subgroups and interactions, and sensitivity analyses                                                                                                                                                                                                                                                                                                                             |
| <b>Discussion</b>        |     |                                                                                                                                                                                                                                                                                                                                                                                                                            |
| Key results              | 18  | Summarise key results with reference to study objectives <b>p 9-10</b>                                                                                                                                                                                                                                                                                                                                                     |
| Limitations              | 19  | Discuss limitations of the study, taking into account sources of potential bias or imprecision. Discuss both direction and magnitude of any potential bias, <b>p 11</b>                                                                                                                                                                                                                                                    |
| Interpretation           | 20  | Give a cautious overall interpretation of results considering objectives, limitations, multiplicity of analyses, results from similar studies, and other relevant evidence <b>p11-12</b>                                                                                                                                                                                                                                   |
| Generalisability         | 21  | Discuss the generalisability (external validity) of the study results <b>p11-12</b>                                                                                                                                                                                                                                                                                                                                        |
| <b>Other information</b> |     |                                                                                                                                                                                                                                                                                                                                                                                                                            |
| Funding                  | 22  | Give the source of funding and the role of the funders for the present study and, if applicable, for the original study on which the present article is based <b>p 12</b>                                                                                                                                                                                                                                                  |

\*Give information separately for cases and controls in case-control studies and, if applicable, for exposed and unexposed groups in cohort and cross-sectional studies.

**Note:** An Explanation and Elaboration article discusses each checklist item and gives methodological background and published examples of transparent reporting. The STROBE checklist is best used in conjunction with this article (freely available on the Web sites of PLoS Medicine at <http://www.plosmedicine.org/>, Annals of Internal Medicine at <http://www.annals.org/>, and Epidemiology at <http://www.epidem.com/>). Information on the STROBE Initiative is available at [www.strobe-statement.org](http://www.strobe-statement.org).
