# Supplementary material for: Nursing workload, patient safety incidents and mortality: an observational study from Finland
Source: PubMed Central journal article supplement — BMJ Open. 2018 Apr 24;8(4):e016367. doi: 10.1136/bmjopen-2017-016367 (PMC5922465; doi:10.1136/bmjopen-2017-016367), 2018-04-24
Supplement: bmjopen-2017-016367supp001.pdf [file bmjopen-2017-016367supp001.pdf]

COMMENT körs på abo\_bjo\_vasa\_v1.sav

COMMENT utan kontrollvariabler

COMMENT läs resultaten enligt Table 1, första kolumnen, sex modeller, andra kolumnen, sex modeller, osv

COMMENT identisk med enbart-vasa-varianten

\*\*

LOGISTIC REGRESSION VARIABLES hand01

/METHOD=ENTER bv1

/CONTRAST (bv1)=Indicator(1)

/PRINT=CI(95)

/CRITERIA=PIN(0.05) POUT(0.10) ITERATE(20) CUT(0.5).

## Block 1: Method = Enter

### Omnibus Tests of Model Coefficients

|        |       | Chi-square | df | Sig. |
|--------|-------|------------|----|------|
| Step 1 | Step  | 66,122     | 2  | ,000 |
|        | Block | 66,122     | 2  | ,000 |
|        | Model | 66,122     | 2  | ,000 |

### Model Summary

| Step | -2 Log likelihood    | Cox & Snell R Square | Nagelkerke R Square |
|------|----------------------|----------------------|---------------------|
| 1    | 8557,46 <sup>a</sup> | ,005                 | ,011                |

a. Estimation terminated at iteration number 5 because parameter estimates changed by less than ,001.

**Classification Table<sup>a</sup>**

| Observed           |                              | Predicted                    |                     |                    |       |
|--------------------|------------------------------|------------------------------|---------------------|--------------------|-------|
|                    |                              | hand01 händelse nej eller ja |                     | Percentage Correct |       |
|                    |                              | 0 ingen händelse             | 1 minst en händelse |                    |       |
| Step 1             | hand01 händelse nej eller ja | 0 ingen händelse             | 11108               | 0                  | 100,0 |
|                    |                              | 1 minst en händelse          | 1367                | 0                  | ,0    |
| Overall Percentage |                              |                              |                     |                    | 89,0  |

a. The cut value is ,500

**Variables in the Equation**

|                         | B      | S.E. | Wald     | df | Sig. | Exp(B) | 95% C.I. for EXP(B) |       |
|-------------------------|--------|------|----------|----|------|--------|---------------------|-------|
|                         |        |      |          |    |      |        | Lower               | Upper |
| Step 1 <sup>a</sup> bv1 |        |      | 63,025   | 2  | ,000 |        |                     |       |
|                         | -,398  | ,079 | 25,244   | 1  | ,000 | ,671   | ,575                | ,784  |
|                         | ,244   | ,064 | 14,581   | 1  | ,000 | 1,277  | 1,126               | 1,447 |
| Constant                | -2,090 | ,044 | 2302,164 | 1  | ,000 | ,124   |                     |       |

a. Variable(s) entered on step 1: bv1.

```
LOGISTIC REGRESSION VARIABLES hand01
/METHOD=ENTER bv2
/CONTRAST (bv2)=Indicator(1)
/PRINT=CI(95)
/CRITERIA=PIN(0.05) POUT(0.10) ITERATE(20) CUT(0.5).
```

## Block 1: Method = Enter

**Omnibus Tests of Model Coefficients**

|        |       | Chi-square | df | Sig. |
|--------|-------|------------|----|------|
| Step 1 | Step  | 51,341     | 2  | ,000 |
|        | Block | 51,341     | 2  | ,000 |
|        | Model | 51,341     | 2  | ,000 |

**Model Summary**

| Step | -2 Log likelihood    | Cox & Snell R Square | Nagelkerke R Square |
|------|----------------------|----------------------|---------------------|
| 1    | 8572,24 <sup>a</sup> | ,004                 | ,008                |

a. Estimation terminated at iteration number 5 because parameter estimates changed by less than ,001.

**Classification Table<sup>a</sup>**

| Observed           |                              | Predicted                    |                     |                    |       |
|--------------------|------------------------------|------------------------------|---------------------|--------------------|-------|
|                    |                              | hand01 händelse nej eller ja |                     | Percentage Correct |       |
|                    |                              | 0 ingen händelse             | 1 minst en händelse |                    |       |
| Step 1             | hand01 händelse nej eller ja | 0 ingen händelse             | 11108               | 0                  | 100,0 |
|                    |                              | 1 minst en händelse          | 1367                | 0                  | ,0    |
| Overall Percentage |                              |                              |                     |                    | 89,0  |

a. The cut value is ,500

**Variables in the Equation**

|                         | B        | S.E.   | Wald   | df       | Sig. | Exp(B) | 95% C.I. for EXP(B) |       |       |
|-------------------------|----------|--------|--------|----------|------|--------|---------------------|-------|-------|
|                         |          |        |        |          |      |        | Lower               | Upper |       |
| Step 1 <sup>a</sup> bv2 |          |        | 49,589 | 2        | ,000 |        |                     |       |       |
|                         | bv2(1)   | -,313  | ,081   | 14,940   | 1    | ,000   | ,732                | ,624  | ,857  |
|                         | bv2(2)   | ,166   | ,073   | 5,185    | 1    | ,023   | 1,180               | 1,023 | 1,361 |
|                         | Constant | -2,071 | ,060   | 1188,882 | 1    | ,000   | ,126                |       |       |

a. Variable(s) entered on step 1: bv2.

```
LOGISTIC REGRESSION VARIABLES hand01
/METHOD=ENTER bv3
/CONTRAST (bv3)=Indicator(1)
/PRINT=CI(95)
/CRITERIA=PIN(0.05) POUT(0.10) ITERATE(20) CUT(0.5).
```

**Block 1: Method = Enter**

### Omnibus Tests of Model Coefficients

|        |       | Chi-square | df | Sig. |
|--------|-------|------------|----|------|
| Step 1 | Step  | 52,926     | 2  | ,000 |
|        | Block | 52,926     | 2  | ,000 |
|        | Model | 52,926     | 2  | ,000 |

### Model Summary

| Step | -2 Log likelihood    | Cox & Snell R Square | Nagelkerke R Square |
|------|----------------------|----------------------|---------------------|
| 1    | 8570,66 <sup>a</sup> | ,004                 | ,008                |

a. Estimation terminated at iteration number 5 because parameter estimates changed by less than ,001.

### Classification Table<sup>a</sup>

| Observed           |                              | Predicted                    |                     |                    |       |
|--------------------|------------------------------|------------------------------|---------------------|--------------------|-------|
|                    |                              | hand01 händelse nej eller ja |                     | Percentage Correct |       |
|                    |                              | 0 ingen händelse             | 1 minst en händelse |                    |       |
| Step 1             | hand01 händelse nej eller ja | 0 ingen händelse             | 11108               | 0                  | 100,0 |
|                    |                              | 1 minst en händelse          | 1367                | 0                  | ,0    |
| Overall Percentage |                              |                              |                     |                    | 89,0  |

a. The cut value is ,500

### Variables in the Equation

|                     | B        | S.E.   | Wald   | df       | Sig. | Exp(B) | 95% C.I. for EXP(B) |       |
|---------------------|----------|--------|--------|----------|------|--------|---------------------|-------|
|                     |          |        |        |          |      |        | Lower               | Upper |
| Step 1 <sup>a</sup> |          |        |        |          |      |        |                     |       |
|                     | bv3      |        | 47,569 | 2        | ,000 |        |                     |       |
|                     | bv3(1)   | -,607  | ,111   | 30,158   | ,000 | ,545   | ,439                | ,677  |
|                     | bv3(2)   | ,255   | ,075   | 11,566   | ,001 | 1,291  | 1,114               | 1,495 |
|                     | Constant | -2,079 | ,033   | 3894,857 | ,000 | ,125   |                     |       |

a. Variable(s) entered on step 1: bv3.

```
LOGISTIC REGRESSION VARIABLES hand01
/METHOD=ENTER sv3
/CONTRAST (sv3)=Indicator(1)
```

/PRINT=CI(95)

/CRITERIA=PIN(0.05) POUT(0.10) ITERATE(20) CUT(0.5).

## Block 1: Method = Enter

### Omnibus Tests of Model Coefficients

|        |       | Chi-square | df | Sig. |
|--------|-------|------------|----|------|
| Step 1 | Step  | 34,433     | 2  | ,000 |
|        | Block | 34,433     | 2  | ,000 |
|        | Model | 34,433     | 2  | ,000 |

### Model Summary

| Step | -2 Log likelihood    | Cox & Snell R Square | Nagelkerke R Square |
|------|----------------------|----------------------|---------------------|
| 1    | 8589,15 <sup>a</sup> | ,003                 | ,006                |

a. Estimation terminated at iteration number 5 because parameter estimates changed by less than ,001.

### Classification Table<sup>a</sup>

| Observed           |                              | Predicted                    |                     |                    |       |
|--------------------|------------------------------|------------------------------|---------------------|--------------------|-------|
|                    |                              | hand01 händelse nej eller ja |                     | Percentage Correct |       |
|                    |                              | 0 ingen händelse             | 1 minst en händelse |                    |       |
| Step 1             | hand01 händelse nej eller ja | 0 ingen händelse             | 11108               | 0                  | 100,0 |
|                    |                              | 1 minst en händelse          | 1367                | 0                  | ,0    |
| Overall Percentage |                              |                              |                     |                    | 89,0  |

a. The cut value is ,500

### Variables in the Equation

|                     | B        | S.E.   | Wald   | df       | Sig. | Exp(B) | 95% C.I. for EXP(B) |       |       |
|---------------------|----------|--------|--------|----------|------|--------|---------------------|-------|-------|
|                     |          |        |        |          |      |        | Lower               | Upper |       |
| Step 1 <sup>a</sup> | sv3      |        | 33,479 | 2        | ,000 |        |                     |       |       |
|                     | sv3(1)   | -,298  | ,075   | 15,716   | 1    | ,000   | ,742                | ,640  | ,860  |
|                     | sv3(2)   | ,084   | ,071   | 1,412    | 1    | ,235   | 1,088               | ,947  | 1,251 |
|                     | Constant | -2,025 | ,055   | 1339,704 | 1    | ,000   | ,132                |       |       |

a. Variable(s) entered on step 1: sv3.

```

LOGISTIC REGRESSION VARIABLES hand01
/METHOD=ENTER sv5
/CONTRAST (sv5)=Indicator(1)
/PRINT=CI(95)
/CRITERIA=PIN(0.05) POUT(0.10) ITERATE(20) CUT(0.5).

```

## Block 1: Method = Enter

### Omnibus Tests of Model Coefficients

|        |       | Chi-square | df | Sig. |
|--------|-------|------------|----|------|
| Step 1 | Step  | 39,044     | 4  | ,000 |
|        | Block | 39,044     | 4  | ,000 |
|        | Model | 39,044     | 4  | ,000 |

### Model Summary

| Step | -2 Log likelihood    | Cox & Snell R Square | Nagelkerke R Square |
|------|----------------------|----------------------|---------------------|
| 1    | 8584,54 <sup>a</sup> | ,003                 | ,006                |

a. Estimation terminated at iteration number 5 because parameter estimates changed by less than ,001.

### Classification Table<sup>a</sup>

|                    |                              | Predicted                    |                     |                    |       |
|--------------------|------------------------------|------------------------------|---------------------|--------------------|-------|
|                    |                              | hand01 händelse nej eller ja |                     | Percentage Correct |       |
| Observed           |                              | 0 ingen händelse             | 1 minst en händelse |                    |       |
| Step 1             | hand01 händelse nej eller ja | 0 ingen händelse             | 11108               | 0                  | 100,0 |
|                    |                              | 1 minst en händelse          | 1367                | 0                  | ,0    |
| Overall Percentage |                              |                              |                     |                    | 89,0  |

a. The cut value is ,500

### Variables in the Equation

|                         | B      | S.E. | Wald    | df | Sig. | Exp(B) | 95% C.I. for EXP(B) |       |
|-------------------------|--------|------|---------|----|------|--------|---------------------|-------|
|                         |        |      |         |    |      |        | Lower               | Upper |
| Step 1 <sup>a</sup> sv5 |        |      | 37,583  | 4  | ,000 |        |                     |       |
| sv5(1)                  | -,386  | ,093 | 17,124  | 1  | ,000 | ,680   | ,566                | ,816  |
| sv5(2)                  | -,122  | ,105 | 1,346   | 1  | ,246 | ,885   | ,721                | 1,088 |
| sv5(3)                  | -,035  | ,096 | ,134    | 1  | ,714 | ,965   | ,799                | 1,166 |
| sv5(4)                  | ,090   | ,090 | 1,012   | 1  | ,315 | 1,095  | ,918                | 1,306 |
| Constant                | -1,995 | ,071 | 781,526 | 1  | ,000 | ,136   |                     |       |

a. Variable(s) entered on step 1: sv5.

```
LOGISTIC REGRESSION VARIABLES hand01
/METHOD=ENTER sv7
/CONTRAST (sv7)=Indicator(1)
/PRINT=CI(95)
/CRITERIA=PIN(0.05) POUT(0.10) ITERATE(20) CUT(0.5).
```

### Block 1: Method = Enter

#### Omnibus Tests of Model Coefficients

|        |       | Chi-square | df | Sig. |
|--------|-------|------------|----|------|
| Step 1 | Step  | 45,807     | 6  | ,000 |
|        | Block | 45,807     | 6  | ,000 |
|        | Model | 45,807     | 6  | ,000 |

#### Model Summary

| Step | -2 Log likelihood    | Cox & Snell R Square | Nagelkerke R Square |
|------|----------------------|----------------------|---------------------|
| 1    | 8577,78 <sup>a</sup> | ,004                 | ,007                |

a. Estimation terminated at iteration number 5 because parameter estimates changed by less than ,001.

**Classification Table<sup>a</sup>**

| Observed           |                              | Predicted                    |                     |                    |       |
|--------------------|------------------------------|------------------------------|---------------------|--------------------|-------|
|                    |                              | hand01 händelse nej eller ja |                     | Percentage Correct |       |
|                    |                              | 0 ingen händelse             | 1 minst en händelse |                    |       |
| Step 1             | hand01 händelse nej eller ja | 0 ingen händelse             | 11108               | 0                  | 100,0 |
|                    |                              | 1 minst en händelse          | 1367                | 0                  | ,0    |
| Overall Percentage |                              |                              |                     |                    | 89,0  |

a. The cut value is ,500

**Variables in the Equation**

|                         | B        | S.E.   | Wald   | df      | Sig. | Exp(B) | 95% C.I. for EXP(B) |       |       |
|-------------------------|----------|--------|--------|---------|------|--------|---------------------|-------|-------|
|                         |          |        |        |         |      |        | Lower               | Upper |       |
| Step 1 <sup>a</sup> sv7 |          |        | 43,366 | 6       | ,000 |        |                     |       |       |
|                         | sv7(1)   | -,467  | ,105   | 19,690  | 1    | ,000   | ,627                | ,510  | ,771  |
|                         | sv7(2)   | -,157  | ,123   | 1,622   | 1    | ,203   | ,855                | ,672  | 1,088 |
|                         | sv7(3)   | -,147  | ,122   | 1,438   | 1    | ,231   | ,864                | ,680  | 1,097 |
|                         | sv7(4)   | -,057  | ,116   | ,247    | 1    | ,619   | ,944                | ,753  | 1,184 |
|                         | sv7(5)   | ,080   | ,105   | ,578    | 1    | ,447   | 1,083               | ,881  | 1,332 |
|                         | sv7(6)   | ,028   | ,104   | ,072    | 1    | ,789   | 1,028               | ,838  | 1,262 |
|                         | Constant | -1,978 | ,081   | 594,335 | 1    | ,000   | ,138                |       |       |

a. Variable(s) entered on step 1: sv7.

\*\*

```
LOGISTIC REGRESSION VARIABLES luonnel1
/METHOD=ENTER bv1
/CONTRAST (bv1)=Indicator(1)
/PRINT=CI(95)
/CRITERIA=PIN(0.05) POUT(0.10) ITERATE(20) CUT(0.5).
```

### Block 1: Method = Enter

**Omnibus Tests of Model Coefficients**

|             | Chi-square | df | Sig. |
|-------------|------------|----|------|
| Step 1 Step | 27,580     | 2  | ,000 |
| Block       | 27,580     | 2  | ,000 |
| Model       | 27,580     | 2  | ,000 |



**Model Summary**

| Step | -2 Log likelihood    | Cox & Snell R Square | Nagelkerke R Square |
|------|----------------------|----------------------|---------------------|
| 1    | 6169,29 <sup>a</sup> | ,002                 | ,006                |

a. Estimation terminated at iteration number 6 because parameter estimates changed by less than ,001.

**Classification Table<sup>a</sup>**

|                    |                                                | Predicted                                                    |              |
|--------------------|------------------------------------------------|--------------------------------------------------------------|--------------|
|                    |                                                | luonnelt1 luonne highest = ...                               |              |
| Observed           |                                                | 0 ingen händelse eller läheltä piti                          |              |
| Step 1             | luonnelt1 luonne highest = tapahtui potilaalle | 0 ingen händelse eller läheltä piti<br>1 tapahtui potilaalle | 11627<br>848 |
| Overall Percentage |                                                |                                                              |              |

**Classification Table<sup>a</sup>**

|                    |                                                | Predicted                                                    |        |
|--------------------|------------------------------------------------|--------------------------------------------------------------|--------|
|                    |                                                | luonnelt1 luonne highest = ...                               |        |
| Observed           |                                                | 1 tapahtui potilaalle                                        |        |
| Step 1             | luonnelt1 luonne highest = tapahtui potilaalle | 0 ingen händelse eller läheltä piti<br>1 tapahtui potilaalle | 0<br>0 |
| Overall Percentage |                                                |                                                              |        |

**Classification Table<sup>a</sup>**

|                    |                                                |                                                              | Predicted          |
|--------------------|------------------------------------------------|--------------------------------------------------------------|--------------------|
| Observed           |                                                |                                                              | Percentage Correct |
| Step 1             | luonnelt1 luonne highest = tapahtui potilaalle | 0 ingen händelse eller läheltä piti<br>1 tapahtui potilaalle | 100,0<br>,0        |
| Overall Percentage |                                                |                                                              | 93,2               |

a. The cut value is ,500

**Variables in the Equation**

|                         | B      | S.E. | Wald     | df | Sig. | Exp(B) | 95% C.I. for EXP(B) |       |
|-------------------------|--------|------|----------|----|------|--------|---------------------|-------|
|                         |        |      |          |    |      |        | Lower               | Upper |
| Step 1 <sup>a</sup> bv1 |        |      | 25,846   | 2  | ,000 |        |                     |       |
|                         | -,387  | ,097 | 15,866   | 1  | ,000 | ,679   | ,561                | ,822  |
|                         | ,119   | ,080 | 2,229    | 1  | ,135 | 1,126  | ,963                | 1,317 |
| Constant                | -2,571 | ,053 | 2346,429 | 1  | ,000 | ,076   |                     |       |

a. Variable(s) entered on step 1: bv1.

```
LOGISTIC REGRESSION VARIABLES luonnelt1
/METHOD=ENTER bv2
/CONTRAST (bv2)=Indicator(1)
/PRINT=CI(95)
/CRITERIA=PIN(0.05) POUT(0.10) ITERATE(20) CUT(0.5).
```

## Block 1: Method = Enter

**Omnibus Tests of Model Coefficients**

|        |       | Chi-square | df | Sig. |
|--------|-------|------------|----|------|
| Step 1 | Step  | 21,300     | 2  | ,000 |
|        | Block | 21,300     | 2  | ,000 |
|        | Model | 21,300     | 2  | ,000 |

**Model Summary**

| Step | -2 Log likelihood    | Cox & Snell R Square | Nagelkerke R Square |
|------|----------------------|----------------------|---------------------|
| 1    | 6175,57 <sup>a</sup> | ,002                 | ,004                |

a. Estimation terminated at iteration number 5 because parameter estimates changed by less than ,001.

**Classification Table<sup>a</sup>**

|                    |                                                | Predicted                                                    |              |
|--------------------|------------------------------------------------|--------------------------------------------------------------|--------------|
|                    |                                                | luonnelt1<br>luonne<br>highest = ...                         |              |
| Observed           |                                                | 0 ingen<br>händelse<br>eller läheltä<br>piti                 |              |
| Step 1             | luonnelt1 luonne highest = tapahtui potilaalle | 0 ingen händelse eller läheltä piti<br>1 tapahtui potilaalle | 11627<br>848 |
| Overall Percentage |                                                |                                                              |              |

**Classification Table<sup>a</sup>**

|                    |                                                | Predicted                                                    |        |
|--------------------|------------------------------------------------|--------------------------------------------------------------|--------|
|                    |                                                | luonnelt1<br>luonne<br>highest = ...                         |        |
| Observed           |                                                | 1 tapahtui<br>potilaalle                                     |        |
| Step 1             | luonnelt1 luonne highest = tapahtui potilaalle | 0 ingen händelse eller läheltä piti<br>1 tapahtui potilaalle | 0<br>0 |
| Overall Percentage |                                                |                                                              |        |

Classification Table<sup>a</sup>

|                    |                                                |                                                              | Predicted          |
|--------------------|------------------------------------------------|--------------------------------------------------------------|--------------------|
| Observed           |                                                |                                                              | Percentage Correct |
| Step 1             | luonnelt1 luonne highest = tapahtui potilaalle | 0 ingen händelse eller läheltä piti<br>1 tapahtui potilaalle | 100,0<br>,0        |
| Overall Percentage |                                                |                                                              | 93,2               |

a. The cut value is ,500

Variables in the Equation

|                         | B      | S.E. | Wald     | df | Sig. | Exp(B) | 95% C.I. for EXP(B) |       |
|-------------------------|--------|------|----------|----|------|--------|---------------------|-------|
|                         |        |      |          |    |      |        | Lower               | Upper |
| Step 1 <sup>a</sup> bv2 |        |      | 20,588   | 2  | ,000 |        |                     |       |
|                         | -,282  | ,099 | 8,073    | 1  | ,004 | ,755   | ,621                | ,916  |
|                         | ,096   | ,090 | 1,146    | 1  | ,284 | 1,101  | ,923                | 1,313 |
| Constant                | -2,571 | ,074 | 1215,978 | 1  | ,000 | ,076   |                     |       |

a. Variable(s) entered on step 1: bv2.

```
LOGISTIC REGRESSION VARIABLES luonnelt1
/METHOD=ENTER bv3
/CONTRAST (bv3)=Indicator(1)
/PRINT=CI(95)
/CRITERIA=PIN(0.05) POUT(0.10) ITERATE(20) CUT(0.5).
```

## Block 1: Method = Enter

Omnibus Tests of Model Coefficients

|        |       | Chi-square | df | Sig. |
|--------|-------|------------|----|------|
| Step 1 | Step  | 21,420     | 2  | ,000 |
|        | Block | 21,420     | 2  | ,000 |
|        | Model | 21,420     | 2  | ,000 |

**Model Summary**

| Step | -2 Log likelihood    | Cox & Snell R Square | Nagelkerke R Square |
|------|----------------------|----------------------|---------------------|
| 1    | 6175,45 <sup>a</sup> | ,002                 | ,004                |

a. Estimation terminated at iteration number 6 because parameter estimates changed by less than ,001.

**Classification Table<sup>a</sup>**

|                    |                                                | Predicted                                                    |              |
|--------------------|------------------------------------------------|--------------------------------------------------------------|--------------|
|                    |                                                | luonnelt1 luonne highest = ...                               |              |
| Observed           |                                                | 0 ingen händelse eller läheltä piti                          |              |
| Step 1             | luonnelt1 luonne highest = tapahtui potilaalle | 0 ingen händelse eller läheltä piti<br>1 tapahtui potilaalle | 11627<br>848 |
| Overall Percentage |                                                |                                                              |              |

**Classification Table<sup>a</sup>**

|                    |                                                | Predicted                                                    |        |
|--------------------|------------------------------------------------|--------------------------------------------------------------|--------|
|                    |                                                | luonnelt1 luonne highest = ...                               |        |
| Observed           |                                                | 1 tapahtui potilaalle                                        |        |
| Step 1             | luonnelt1 luonne highest = tapahtui potilaalle | 0 ingen händelse eller läheltä piti<br>1 tapahtui potilaalle | 0<br>0 |
| Overall Percentage |                                                |                                                              |        |

**Classification Table<sup>a</sup>**

|                    |                                                |                                                              | Predicted          |
|--------------------|------------------------------------------------|--------------------------------------------------------------|--------------------|
| Observed           |                                                |                                                              | Percentage Correct |
| Step 1             | luonnelt1 luonne highest = tapahtui potilaalle | 0 ingen händelse eller läheltä piti<br>1 tapahtui potilaalle | 100,0<br>,0        |
| Overall Percentage |                                                |                                                              | 93,2               |

a. The cut value is ,500

**Variables in the Equation**

|                         | B        | S.E.   | Wald   | df       | Sig. | Exp(B) | 95% C.I. for EXP(B) |                |
|-------------------------|----------|--------|--------|----------|------|--------|---------------------|----------------|
|                         |          |        |        |          |      |        | Lower               | Upper          |
| Step 1 <sup>a</sup> bv3 |          |        | 19,526 | 2        | ,000 |        |                     |                |
|                         | bv3(1)   | -,481  | ,132   | 13,182   | 1    | ,000   | ,618                | ,477<br>,801   |
|                         | bv3(2)   | ,188   | ,094   | 3,996    | 1    | ,046   | 1,207               | 1,004<br>1,452 |
|                         | Constant | -2,601 | ,041   | 3967,818 | 1    | ,000   | ,074                |                |

a. Variable(s) entered on step 1: bv3.

```
LOGISTIC REGRESSION VARIABLES luonnelt1
/METHOD=ENTER sv3
/CONTRAST (sv3)=Indicator(1)
/PRINT=CI(95)
/CRITERIA=PIN(0.05) POUT(0.10) ITERATE(20) CUT(0.5).
```

## Block 1: Method = Enter

**Omnibus Tests of Model Coefficients**

|        |       | Chi-square | df | Sig. |
|--------|-------|------------|----|------|
| Step 1 | Step  | 16,005     | 2  | ,000 |
|        | Block | 16,005     | 2  | ,000 |
|        | Model | 16,005     | 2  | ,000 |

**Model Summary**

| Step | -2 Log likelihood    | Cox & Snell R Square | Nagelkerke R Square |
|------|----------------------|----------------------|---------------------|
| 1    | 6180,87 <sup>a</sup> | ,001                 | ,003                |

a. Estimation terminated at iteration number 5 because parameter estimates changed by less than ,001.

**Classification Table<sup>a</sup>**

|                    |                                                | Predicted                                                    |              |
|--------------------|------------------------------------------------|--------------------------------------------------------------|--------------|
|                    |                                                | luonnelt1 luonne highest = ...                               |              |
| Observed           |                                                | 0 ingen händelse eller läheltä piti                          |              |
| Step 1             | luonnelt1 luonne highest = tapahtui potilaalle | 0 ingen händelse eller läheltä piti<br>1 tapahtui potilaalle | 11627<br>848 |
| Overall Percentage |                                                |                                                              |              |

**Classification Table<sup>a</sup>**

|                    |                                                | Predicted                                                    |        |
|--------------------|------------------------------------------------|--------------------------------------------------------------|--------|
|                    |                                                | luonnelt1 luonne highest = ...                               |        |
| Observed           |                                                | 1 tapahtui potilaalle                                        |        |
| Step 1             | luonnelt1 luonne highest = tapahtui potilaalle | 0 ingen händelse eller läheltä piti<br>1 tapahtui potilaalle | 0<br>0 |
| Overall Percentage |                                                |                                                              |        |

**Classification Table<sup>a</sup>**

|                    |                                                |                                                              | Predicted          |
|--------------------|------------------------------------------------|--------------------------------------------------------------|--------------------|
| Observed           |                                                |                                                              | Percentage Correct |
| Step 1             | luonnelt1 luonne highest = tapahtui potilaalle | 0 ingen händelse eller läheltä piti<br>1 tapahtui potilaalle | 100,0<br>,0        |
| Overall Percentage |                                                |                                                              | 93,2               |

a. The cut value is ,500

**Variables in the Equation**

|                         | B      | S.E. | Wald     | df | Sig. | Exp(B) | 95% C.I. for EXP(B) |       |
|-------------------------|--------|------|----------|----|------|--------|---------------------|-------|
|                         |        |      |          |    |      |        | Lower               | Upper |
| Step 1 <sup>a</sup> sv3 |        |      | 15,909   | 2  | ,000 |        |                     |       |
| sv3(1)                  | -,164  | ,094 | 3,014    | 1  | ,083 | ,849   | ,706                | 1,021 |
| sv3(2)                  | ,167   | ,090 | 3,463    | 1  | ,063 | 1,181  | ,991                | 1,408 |
| Constant                | -2,626 | ,071 | 1376,464 | 1  | ,000 | ,072   |                     |       |

a. Variable(s) entered on step 1: sv3.

```
LOGISTIC REGRESSION VARIABLES luonnelt1
/METHOD=ENTER sv5
/CONTRAST (sv5)=Indicator(1)
/PRINT=CI(95)
/CRITERIA=PIN(0.05) POUT(0.10) ITERATE(20) CUT(0.5).
```

## Block 1: Method = Enter

**Omnibus Tests of Model Coefficients**

|        |       | Chi-square | df | Sig. |
|--------|-------|------------|----|------|
| Step 1 | Step  | 15,434     | 4  | ,004 |
|        | Block | 15,434     | 4  | ,004 |
|        | Model | 15,434     | 4  | ,004 |



**Model Summary**

| Step | -2 Log likelihood    | Cox & Snell R Square | Nagelkerke R Square |
|------|----------------------|----------------------|---------------------|
| 1    | 6181,44 <sup>a</sup> | ,001                 | ,003                |

a. Estimation terminated at iteration number 5 because parameter estimates changed by less than ,001.

**Classification Table<sup>a</sup>**

|                    |                                                | Predicted                                                    |              |
|--------------------|------------------------------------------------|--------------------------------------------------------------|--------------|
|                    |                                                | luonnelt1 luonne highest = ...                               |              |
| Observed           |                                                | 0 ingen händelse eller läheltä piti                          |              |
| Step 1             | luonnelt1 luonne highest = tapahtui potilaalle | 0 ingen händelse eller läheltä piti<br>1 tapahtui potilaalle | 11627<br>848 |
| Overall Percentage |                                                |                                                              |              |

**Classification Table<sup>a</sup>**

|                    |                                                | Predicted                                                    |        |
|--------------------|------------------------------------------------|--------------------------------------------------------------|--------|
|                    |                                                | luonnelt1 luonne highest = ...                               |        |
| Observed           |                                                | 1 tapahtui potilaalle                                        |        |
| Step 1             | luonnelt1 luonne highest = tapahtui potilaalle | 0 ingen händelse eller läheltä piti<br>1 tapahtui potilaalle | 0<br>0 |
| Overall Percentage |                                                |                                                              |        |

**Classification Table<sup>a</sup>**

|                    |                                                |                                                              | Predicted          |
|--------------------|------------------------------------------------|--------------------------------------------------------------|--------------------|
| Observed           |                                                |                                                              | Percentage Correct |
| Step 1             | luonnelt1 luonne highest = tapahtui potilaalle | 0 ingen händelse eller läheltä piti<br>1 tapahtui potilaalle | 100,0<br>,0        |
| Overall Percentage |                                                |                                                              | 93,2               |

a. The cut value is ,500

**Variables in the Equation**

|                     |          | B      | S.E. | Wald    | df | Sig. | Exp(B) | 95% C.I. for EXP(B) |       |
|---------------------|----------|--------|------|---------|----|------|--------|---------------------|-------|
|                     |          |        |      |         |    |      |        | Lower               | Upper |
| Step 1 <sup>a</sup> | sv5      |        |      | 15,236  | 4  | ,004 |        |                     |       |
|                     | sv5(1)   | -,215  | ,117 | 3,419   | 1  | ,064 | ,806   | ,642                | 1,013 |
|                     | sv5(2)   | -,099  | ,134 | ,551    | 1  | ,458 | ,905   | ,696                | 1,177 |
|                     | sv5(3)   | ,064   | ,121 | ,280    | 1  | ,597 | 1,066  | ,841                | 1,351 |
|                     | sv5(4)   | ,149   | ,114 | 1,719   | 1  | ,190 | 1,161  | ,929                | 1,451 |
|                     | Constant | -2,598 | ,091 | 810,642 | 1  | ,000 | ,074   |                     |       |

a. Variable(s) entered on step 1: sv5.

```
LOGISTIC REGRESSION VARIABLES luonnelt1
/METHOD=ENTER sv7
/CONTRAST (sv7)=Indicator(1)
/PRINT=CI(95)
/CRITERIA=PIN(0.05) POUT(0.10) ITERATE(20) CUT(0.5).
```

### Block 1: Method = Enter

**Omnibus Tests of Model Coefficients**

|        |       | Chi-square | df | Sig. |
|--------|-------|------------|----|------|
| Step 1 | Step  | 19,604     | 6  | ,003 |
|        | Block | 19,604     | 6  | ,003 |
|        | Model | 19,604     | 6  | ,003 |

**Model Summary**

| Step | -2 Log likelihood    | Cox & Snell R Square | Nagelkerke R Square |
|------|----------------------|----------------------|---------------------|
| 1    | 6177,27 <sup>a</sup> | ,002                 | ,004                |

a. Estimation terminated at iteration number 5 because parameter estimates changed by less than ,001.

**Classification Table<sup>a</sup>**

|                    |                                                | Predicted                                                    |              |
|--------------------|------------------------------------------------|--------------------------------------------------------------|--------------|
|                    |                                                | luonnelt1 luonne highest = ...                               |              |
| Observed           |                                                | 0 ingen händelse eller läheltä piti                          |              |
| Step 1             | luonnelt1 luonne highest = tapahtui potilaalle | 0 ingen händelse eller läheltä piti<br>1 tapahtui potilaalle | 11627<br>848 |
| Overall Percentage |                                                |                                                              |              |

**Classification Table<sup>a</sup>**

|                    |                                                | Predicted                                                    |        |
|--------------------|------------------------------------------------|--------------------------------------------------------------|--------|
|                    |                                                | luonnelt1 luonne highest = ...                               |        |
| Observed           |                                                | 1 tapahtui potilaalle                                        |        |
| Step 1             | luonnelt1 luonne highest = tapahtui potilaalle | 0 ingen händelse eller läheltä piti<br>1 tapahtui potilaalle | 0<br>0 |
| Overall Percentage |                                                |                                                              |        |

Classification Table<sup>a</sup>

|                    |                                                |                                                              | Predicted          |
|--------------------|------------------------------------------------|--------------------------------------------------------------|--------------------|
| Observed           |                                                |                                                              | Percentage Correct |
| Step 1             | luonnelt1 luonne highest = tapahtui potilaalle | 0 ingen händelse eller läheltä piti<br>1 tapahtui potilaalle | 100,0<br>,0        |
| Overall Percentage |                                                |                                                              | 93,2               |

a. The cut value is ,500

Variables in the Equation

|                     |          | B      | S.E. | Wald    | df | Sig. | Exp(B) | 95% C.I. for EXP(B) |       |
|---------------------|----------|--------|------|---------|----|------|--------|---------------------|-------|
|                     |          |        |      |         |    |      |        | Lower               | Upper |
| Step 1 <sup>a</sup> | sv7      |        |      | 19,036  | 6  | ,004 |        |                     |       |
|                     | sv7(1)   | -,344  | ,130 | 7,051   | 1  | ,008 | ,709   | ,550                | ,914  |
|                     | sv7(2)   | -,170  | ,155 | 1,200   | 1  | ,273 | ,844   | ,623                | 1,143 |
|                     | sv7(3)   | -,157  | ,154 | 1,044   | 1  | ,307 | ,855   | ,632                | 1,155 |
|                     | sv7(4)   | -,037  | ,144 | ,067    | 1  | ,796 | ,963   | ,727                | 1,278 |
|                     | sv7(5)   | ,096   | ,131 | ,531    | 1  | ,466 | 1,100  | ,851                | 1,423 |
|                     | sv7(6)   | ,037   | ,130 | ,080    | 1  | ,777 | 1,038  | ,804                | 1,339 |
|                     | Constant | -2,530 | ,101 | 622,458 | 1  | ,000 | ,080   |                     |       |

a. Variable(s) entered on step 1: sv7.

\*\*

```
LOGISTIC REGRESSION VARIABLES seurauslt3
/METHOD=ENTER bv1
/CONTRAST (bv1)=Indicator(1)
/PRINT=CI(95)
/CRITERIA=PIN(0.05) POUT(0.10) ITERATE(20) CUT(0.5).
```

**Block 1: Method = Enter**

**Omnibus Tests of Model Coefficients**

|        |       | Chi-square | df | Sig. |
|--------|-------|------------|----|------|
| Step 1 | Step  | 16,012     | 2  | ,000 |
|        | Block | 16,012     | 2  | ,000 |
|        | Model | 16,012     | 2  | ,000 |

**Model Summary**

| Step | -2 Log likelihood    | Cox & Snell R Square | Nagelkerke R Square |
|------|----------------------|----------------------|---------------------|
| 1    | 3523,04 <sup>a</sup> | ,001                 | ,005                |

a. Estimation terminated at iteration number 6 because parameter estimates changed by less than ,001.

**Classification Table<sup>a</sup>**

|                    |                                                    | Predicted<br>seurauslt3<br>seuraus<br>highest = .. |
|--------------------|----------------------------------------------------|----------------------------------------------------|
| Observed           |                                                    | 0 ingen<br>händelse<br>eller ei<br>haittaa         |
| Step 1             | seurauslt3 seuraus highest = haitta (i någon form) | 12075<br>400                                       |
| Overall Percentage |                                                    |                                                    |

**Classification Table<sup>a</sup>**

|                    |                                                    | Predicted<br>seurauslt3<br>seuraus<br>highest = ... |
|--------------------|----------------------------------------------------|-----------------------------------------------------|
| Observed           |                                                    | 1 haitta (i någon form)                             |
| Step 1             | seurauslt3 seuraus highest = haitta (i någon form) | 0<br>0                                              |
| Overall Percentage |                                                    |                                                     |

**Classification Table<sup>a</sup>**

|                    |                                                              | Predicted          |
|--------------------|--------------------------------------------------------------|--------------------|
| Observed           |                                                              | Percentage Correct |
| Step 1             | seurauslt3 seuraus highest = haitta (i någon form)           | 100,0              |
|                    | 0 ingen händelse eller ei haittaa<br>1 haitta (i någon form) | ,0                 |
| Overall Percentage |                                                              | 96,8               |

a. The cut value is ,500

**Variables in the Equation**

|                         | B        | S.E.   | Wald   | df       | Sig. | Exp(B) | 95% C.I. for EXP(B) |       |       |
|-------------------------|----------|--------|--------|----------|------|--------|---------------------|-------|-------|
|                         |          |        |        |          |      |        | Lower               | Upper |       |
| Step 1 <sup>a</sup> bv1 |          |        | 14,905 | 2        | ,001 |        |                     |       |       |
|                         | bv1(1)   | -,409  | ,141   | 8,381    | 1    | ,004   | ,664                | ,503  | ,876  |
|                         | bv1(2)   | ,151   | ,113   | 1,778    | 1    | ,182   | 1,163               | ,932  | 1,451 |
|                         | Constant | -3,369 | ,076   | 1964,339 | 1    | ,000   | ,034                |       |       |

a. Variable(s) entered on step 1: bv1.

```
LOGISTIC REGRESSION VARIABLES seurauslt3
/METHOD=ENTER bv2
/CONTRAST (bv2)=Indicator(1)
/PRINT=CI(95)
/CRITERIA=PIN(0.05) POUT(0.10) ITERATE(20) CUT(0.5).
```

## Block 1: Method = Enter

**Omnibus Tests of Model Coefficients**

|        |       | Chi-square | df | Sig. |
|--------|-------|------------|----|------|
| Step 1 | Step  | 10,152     | 2  | ,006 |
|        | Block | 10,152     | 2  | ,006 |
|        | Model | 10,152     | 2  | ,006 |

**Model Summary**

| Step | -2 Log likelihood    | Cox & Snell R Square | Nagelkerke R Square |
|------|----------------------|----------------------|---------------------|
| 1    | 3528,90 <sup>a</sup> | ,001                 | ,003                |

a. Estimation terminated at iteration number 6 because parameter estimates changed by less than ,001.

**Classification Table<sup>a</sup>**

|                    |                                                    | Predicted<br>seurauslt3<br>seuraus<br>highest = ... |
|--------------------|----------------------------------------------------|-----------------------------------------------------|
| Observed           |                                                    | 0 ingen<br>händelse<br>eller ei<br>haittaa          |
| Step 1             | seurauslt3 seuraus highest = haitta (i någon form) | 12075<br>400                                        |
| Overall Percentage |                                                    |                                                     |

**Classification Table<sup>a</sup>**

|                    |                                                    | Predicted<br>seurauslt3<br>seuraus<br>highest = ... |
|--------------------|----------------------------------------------------|-----------------------------------------------------|
| Observed           |                                                    | 1 haitta (i någon form)                             |
| Step 1             | seurauslt3 seuraus highest = haitta (i någon form) | 0<br>0                                              |
| Overall Percentage |                                                    |                                                     |

**Classification Table<sup>a</sup>**

|                    |                                                    | Predicted          |
|--------------------|----------------------------------------------------|--------------------|
| Observed           |                                                    | Percentage Correct |
| Step 1             | seurauslt3 seuraus highest = haitta (i någon form) | 100,0<br>,0        |
| Overall Percentage |                                                    | 96,8               |

a. The cut value is ,500

**Variables in the Equation**

|                         | B      | S.E. | Wald    | df | Sig. | Exp(B) | 95% C.I. for EXP(B) |       |
|-------------------------|--------|------|---------|----|------|--------|---------------------|-------|
|                         |        |      |         |    |      |        | Lower               | Upper |
| Step 1 <sup>a</sup> bv2 |        |      | 9,953   | 2  | ,007 |        |                     |       |
| bv2(1)                  | -,199  | ,144 | 1,911   | 1  | ,167 | ,820   | ,619                | 1,087 |
| bv2(2)                  | ,176   | ,130 | 1,813   | 1  | ,178 | 1,192  | ,923                | 1,539 |
| Constant                | -3,424 | ,108 | 998,936 | 1  | ,000 | ,033   |                     |       |

a. Variable(s) entered on step 1: bv2.

```
LOGISTIC REGRESSION VARIABLES seurauslt3
/METHOD=ENTER bv3
/CONTRAST (bv3)=Indicator(1)
/PRINT=CI(95)
/CRITERIA=PIN(0.05) POUT(0.10) ITERATE(20) CUT(0.5).
```

## Block 1: Method = Enter

**Omnibus Tests of Model Coefficients**

|        |       | Chi-square | df | Sig. |
|--------|-------|------------|----|------|
| Step 1 | Step  | 7,005      | 2  | ,030 |
|        | Block | 7,005      | 2  | ,030 |
|        | Model | 7,005      | 2  | ,030 |

**Model Summary**

| Step | -2 Log likelihood    | Cox & Snell R Square | Nagelkerke R Square |
|------|----------------------|----------------------|---------------------|
| 1    | 3532,04 <sup>a</sup> | ,001                 | ,002                |

a. Estimation terminated at iteration number 6 because parameter estimates changed by less than ,001.



**Classification Table<sup>a</sup>**

| Observed           |                                                    | Predicted                         |
|--------------------|----------------------------------------------------|-----------------------------------|
|                    |                                                    | seurauslt3 seuraus highest = ...  |
| Step 1             | seurauslt3 seuraus highest = haitta (i någon form) | 0 ingen händelse eller ei haittaa |
|                    |                                                    | 1 haitta (i någon form)           |
| Overall Percentage |                                                    | 12075<br>400                      |

**Classification Table<sup>a</sup>**

| Observed           |                                                    | Predicted                         |
|--------------------|----------------------------------------------------|-----------------------------------|
|                    |                                                    | seurauslt3 seuraus highest = ...  |
| Step 1             | seurauslt3 seuraus highest = haitta (i någon form) | 1 haitta (i någon form)           |
|                    |                                                    | 0 ingen händelse eller ei haittaa |
| Overall Percentage |                                                    | 0<br>0                            |

**Classification Table<sup>a</sup>**

| Observed           |                                                    | Predicted                         |
|--------------------|----------------------------------------------------|-----------------------------------|
|                    |                                                    | Percentage Correct                |
| Step 1             | seurauslt3 seuraus highest = haitta (i någon form) | 0 ingen händelse eller ei haittaa |
|                    |                                                    | 1 haitta (i någon form)           |
| Overall Percentage |                                                    | 100,0<br>,0<br>96,8               |

a. The cut value is ,500

**Variables in the Equation**

|                         | B      | S.E. | Wald     | df | Sig. | Exp(B) | 95% C.I. for EXP(B) |       |
|-------------------------|--------|------|----------|----|------|--------|---------------------|-------|
|                         |        |      |          |    |      |        | Lower               | Upper |
| Step 1 <sup>a</sup> bv3 |        |      | 6,364    | 2  | ,042 |        |                     |       |
| bv3(1)                  | -,413  | ,186 | 4,960    | 1  | ,026 | ,661   | ,460                | ,952  |
| bv3(2)                  | ,119   | ,137 | ,758     | 1  | ,384 | 1,127  | ,862                | 1,473 |
| Constant                | -3,385 | ,059 | 3312,839 | 1  | ,000 | ,034   |                     |       |

a. Variable(s) entered on step 1: bv3.

```
LOGISTIC REGRESSION VARIABLES seurauslt3
/METHOD=ENTER sv3
/CONTRAST (sv3)=Indicator(1)
/PRINT=CI(95)
/CRITERIA=PIN(0.05) POUT(0.10) ITERATE(20) CUT(0.5).
```

**Block 1: Method = Enter**

**Omnibus Tests of Model Coefficients**

|             | Chi-square | df | Sig. |
|-------------|------------|----|------|
| Step 1 Step | 13,919     | 2  | ,001 |
| Block       | 13,919     | 2  | ,001 |
| Model       | 13,919     | 2  | ,001 |

**Model Summary**

| Step | -2 Log likelihood    | Cox & Snell R Square | Nagelkerke R Square |
|------|----------------------|----------------------|---------------------|
| 1    | 3525,13 <sup>a</sup> | ,001                 | ,005                |

a. Estimation terminated at iteration number 6 because parameter estimates changed by less than ,001.

**Classification Table<sup>a</sup>**

| Observed           |                                                     | Predicted                         |
|--------------------|-----------------------------------------------------|-----------------------------------|
|                    |                                                     | seurauslt3 seuraus highest = ...  |
| Step 1             | seurauslt3 seuraus highest = haittaa (i någon form) | 0 ingen händelse eller ei haittaa |
|                    |                                                     | 1 haittaa (i någon form)          |
| Overall Percentage |                                                     | 12075<br>400                      |

**Classification Table<sup>a</sup>**

| Observed           |                                                     | Predicted                         |
|--------------------|-----------------------------------------------------|-----------------------------------|
|                    |                                                     | seurauslt3 seuraus highest = ...  |
| Step 1             | seurauslt3 seuraus highest = haittaa (i någon form) | 1 haittaa (i någon form)          |
|                    |                                                     | 0 ingen händelse eller ei haittaa |
| Overall Percentage |                                                     | 0<br>0                            |

**Classification Table<sup>a</sup>**

| Observed           |                                                     | Predicted                         |
|--------------------|-----------------------------------------------------|-----------------------------------|
|                    |                                                     | Percentage Correct                |
| Step 1             | seurauslt3 seuraus highest = haittaa (i någon form) | 0 ingen händelse eller ei haittaa |
|                    |                                                     | 1 haittaa (i någon form)          |
| Overall Percentage |                                                     | 100,0<br>,0<br>96,8               |

a. The cut value is ,500

**Variables in the Equation**

|                         | B      | S.E. | Wald     | df | Sig. | Exp(B) | 95% C.I. for EXP(B) |       |
|-------------------------|--------|------|----------|----|------|--------|---------------------|-------|
|                         |        |      |          |    |      |        | Lower               | Upper |
| Step 1 <sup>a</sup> sv3 |        |      | 13,710   | 2  | ,001 |        |                     |       |
| sv3(1)                  | -,231  | ,137 | 2,848    | 1  | ,091 | ,794   | ,607                | 1,038 |
| sv3(2)                  | ,211   | ,127 | 2,784    | 1  | ,095 | 1,235  | ,964                | 1,583 |
| Constant                | -3,415 | ,101 | 1140,138 | 1  | ,000 | ,033   |                     |       |

a. Variable(s) entered on step 1: sv3.

```
LOGISTIC REGRESSION VARIABLES seurauslt3
/METHOD=ENTER sv5
/CONTRAST (sv5)=Indicator(1)
/PRINT=CI(95)
/CRITERIA=PIN(0.05) POUT(0.10) ITERATE(20) CUT(0.5).
```

**Block 1: Method = Enter**

**Omnibus Tests of Model Coefficients**

|             | Chi-square | df | Sig. |
|-------------|------------|----|------|
| Step 1 Step | 17,212     | 4  | ,002 |
| Block       | 17,212     | 4  | ,002 |
| Model       | 17,212     | 4  | ,002 |

**Model Summary**

| Step | -2 Log likelihood    | Cox & Snell R Square | Nagelkerke R Square |
|------|----------------------|----------------------|---------------------|
| 1    | 3521,84 <sup>a</sup> | ,001                 | ,006                |

a. Estimation terminated at iteration number 6 because parameter estimates changed by less than ,001.

**Classification Table<sup>a</sup>**

| Observed           |                                                    | Predicted                         |                                   |
|--------------------|----------------------------------------------------|-----------------------------------|-----------------------------------|
|                    |                                                    | seurauslt3 seuraus highest = ...  | 0 ingen händelse eller ei haittaa |
| Step 1             | seurauslt3 seuraus highest = haitta (i någon form) | 0 ingen händelse eller ei haittaa | 12075                             |
|                    |                                                    | 1 haitta (i någon form)           | 400                               |
| Overall Percentage |                                                    |                                   |                                   |

**Classification Table<sup>a</sup>**

| Observed           |                                                    | Predicted                         |                         |
|--------------------|----------------------------------------------------|-----------------------------------|-------------------------|
|                    |                                                    | seurauslt3 seuraus highest = ...  | 1 haitta (i någon form) |
| Step 1             | seurauslt3 seuraus highest = haitta (i någon form) | 0 ingen händelse eller ei haittaa | 0                       |
|                    |                                                    | 1 haitta (i någon form)           | 0                       |
| Overall Percentage |                                                    |                                   |                         |

**Classification Table<sup>a</sup>**

| Observed           |                                                    | Predicted                         |       |
|--------------------|----------------------------------------------------|-----------------------------------|-------|
|                    |                                                    | Percentage Correct                |       |
| Step 1             | seurauslt3 seuraus highest = haitta (i någon form) | 0 ingen händelse eller ei haittaa | 100,0 |
|                    |                                                    | 1 haitta (i någon form)           | ,0    |
| Overall Percentage |                                                    |                                   | 96,8  |

a. The cut value is ,500

### Variables in the Equation

|                         | B      | S.E. | Wald    | df | Sig. | Exp(B) | 95% C.I. for EXP(B) |       |
|-------------------------|--------|------|---------|----|------|--------|---------------------|-------|
|                         |        |      |         |    |      |        | Lower               | Upper |
| Step 1 <sup>a</sup> sv5 |        |      | 17,247  | 4  | ,002 |        |                     |       |
| sv5(1)                  | -,140  | ,173 | ,654    | 1  | ,419 | ,870   | ,620                | 1,220 |
| sv5(2)                  | -,147  | ,204 | ,522    | 1  | ,470 | ,863   | ,579                | 1,287 |
| sv5(3)                  | ,220   | ,176 | 1,566   | 1  | ,211 | 1,246  | ,883                | 1,759 |
| sv5(4)                  | ,356   | ,165 | 4,649   | 1  | ,031 | 1,427  | 1,033               | 1,972 |
| Constant                | -3,493 | ,137 | 651,114 | 1  | ,000 | ,030   |                     |       |

a. Variable(s) entered on step 1: sv5.

```
LOGISTIC REGRESSION VARIABLES seurauslt3
/METHOD=ENTER sv7
/CONTRAST (sv7)=Indicator(1)
/PRINT=CI(95)
/CRITERIA=PIN(0.05) POUT(0.10) ITERATE(20) CUT(0.5).
```

### Block 1: Method = Enter

#### Omnibus Tests of Model Coefficients

|        |       | Chi-square | df | Sig. |
|--------|-------|------------|----|------|
| Step 1 | Step  | 16,401     | 6  | ,012 |
|        | Block | 16,401     | 6  | ,012 |
|        | Model | 16,401     | 6  | ,012 |

#### Model Summary

| Step | -2 Log likelihood    | Cox & Snell R Square | Nagelkerke R Square |
|------|----------------------|----------------------|---------------------|
| 1    | 3522,65 <sup>a</sup> | ,001                 | ,005                |

a. Estimation terminated at iteration number 6 because parameter estimates changed by less than ,001.

**Classification Table<sup>a</sup>**

| Observed           |                                                    | Predicted                         |
|--------------------|----------------------------------------------------|-----------------------------------|
|                    |                                                    | seurauslt3 seuraus highest = ...  |
| Step 1             | seurauslt3 seuraus highest = haitta (i någon form) | 0 ingen händelse eller ei haittaa |
|                    |                                                    | 1 haitta (i någon form)           |
| Overall Percentage |                                                    |                                   |

**Classification Table<sup>a</sup>**

| Observed           |                                                    | Predicted                         |
|--------------------|----------------------------------------------------|-----------------------------------|
|                    |                                                    | seurauslt3 seuraus highest = ...  |
| Step 1             | seurauslt3 seuraus highest = haitta (i någon form) | 1 haitta (i någon form)           |
|                    |                                                    | 0 ingen händelse eller ei haittaa |
| Overall Percentage |                                                    |                                   |

**Classification Table<sup>a</sup>**

| Observed           |                                                    | Predicted                         |
|--------------------|----------------------------------------------------|-----------------------------------|
|                    |                                                    | Percentage Correct                |
| Step 1             | seurauslt3 seuraus highest = haitta (i någon form) | 0 ingen händelse eller ei haittaa |
|                    |                                                    | 1 haitta (i någon form)           |
| Overall Percentage |                                                    |                                   |

a. The cut value is ,500

**Variables in the Equation**

|                         | B      | S.E. | Wald    | df | Sig. | Exp(B) | 95% C.I. for EXP(B) |       |
|-------------------------|--------|------|---------|----|------|--------|---------------------|-------|
|                         |        |      |         |    |      |        | Lower               | Upper |
| Step 1 <sup>a</sup> sv7 |        |      | 15,922  | 6  | ,014 |        |                     |       |
| sv7(1)                  | -,289  | ,191 | 2,297   | 1  | ,130 | ,749   | ,516                | 1,088 |
| sv7(2)                  | -,297  | ,238 | 1,553   | 1  | ,213 | ,743   | ,466                | 1,185 |
| sv7(3)                  | -,095  | ,224 | ,179    | 1  | ,672 | ,909   | ,586                | 1,411 |
| sv7(4)                  | ,131   | ,205 | ,407    | 1  | ,524 | 1,140  | ,763                | 1,704 |
| sv7(5)                  | ,181   | ,191 | ,904    | 1  | ,342 | 1,199  | ,825                | 1,742 |
| sv7(6)                  | ,216   | ,186 | 1,345   | 1  | ,246 | 1,241  | ,861                | 1,788 |
| Constant                | -3,399 | ,150 | 514,274 | 1  | ,000 | ,033   |                     |       |

a. Variable(s) entered on step 1: sv7.

\*\*

```
LOGISTIC REGRESSION VARIABLES handlt1
/METHOD=ENTER bv1
/CONTRAST (bv1)=Indicator(1)
/PRINT=CI(95)
/CRITERIA=PIN(0.05) POUT(0.10) ITERATE(20) CUT(0.5).
```

**Block 1: Method = Enter**

**Omnibus Tests of Model Coefficients**

|        |       | Chi-square | df | Sig. |
|--------|-------|------------|----|------|
| Step 1 | Step  | 12,400     | 2  | ,002 |
|        | Block | 12,400     | 2  | ,002 |
|        | Model | 12,400     | 2  | ,002 |

**Model Summary**

| Step | -2 Log likelihood    | Cox & Snell R Square | Nagelkerke R Square |
|------|----------------------|----------------------|---------------------|
| 1    | 2406,38 <sup>a</sup> | ,001                 | ,006                |

a. Estimation terminated at iteration number 7 because parameter estimates changed by less than ,001.



**Classification Table<sup>a</sup>**

| Observed           |                                | Predicted                      |                      |   |
|--------------------|--------------------------------|--------------------------------|----------------------|---|
|                    |                                | handlt1 händelse larger than 1 |                      |   |
|                    |                                | 0 ingen eller en händelse      | 1 mer än en händelse |   |
| Step 1             | handlt1 händelse larger than 1 | 0 ingen eller en händelse      | 12229                | 0 |
|                    |                                | 1 mer än en händelse           | 246                  | 0 |
| Overall Percentage |                                |                                |                      |   |

**Classification Table<sup>a</sup>**

| Observed           |                                | Predicted          |
|--------------------|--------------------------------|--------------------|
|                    |                                | Percentage Correct |
| Step 1             | handlt1 händelse larger than 1 | 100,0              |
|                    |                                | ,0                 |
| Overall Percentage |                                | 98,0               |

a. The cut value is ,500

**Variables in the Equation**

|                         | B        | S.E.   | Wald   | df       | Sig. | Exp(B) | 95% C.I. for EXP(B) |       |       |
|-------------------------|----------|--------|--------|----------|------|--------|---------------------|-------|-------|
|                         |          |        |        |          |      |        | Lower               | Upper |       |
| Step 1 <sup>a</sup> bv1 |          |        | 11,665 | 2        | ,003 |        |                     |       |       |
|                         | bv1(1)   | -,406  | ,182   | 4,969    | 1    | ,026   | ,667                | ,467  | ,952  |
|                         | bv1(2)   | ,225   | ,142   | 2,508    | 1    | ,113   | 1,253               | ,948  | 1,655 |
|                         | Constant | -3,898 | ,098   | 1593,079 | 1    | ,000   | ,020                |       |       |

a. Variable(s) entered on step 1: bv1.

```
LOGISTIC REGRESSION VARIABLES handlt1
/METHOD=ENTER bv2
/CONTRAST (bv2)=Indicator(1)
/PRINT=CI(95)
/CRITERIA=PIN(0.05) POUT(0.10) ITERATE(20) CUT(0.5).
```

**Block 1: Method = Enter**

**Omnibus Tests of Model Coefficients**

|        |       | Chi-square | df | Sig. |
|--------|-------|------------|----|------|
| Step 1 | Step  | 9,470      | 2  | ,009 |
|        | Block | 9,470      | 2  | ,009 |
|        | Model | 9,470      | 2  | ,009 |

**Model Summary**

| Step | -2 Log likelihood    | Cox & Snell R Square | Nagelkerke R Square |
|------|----------------------|----------------------|---------------------|
| 1    | 2409,31 <sup>a</sup> | ,001                 | ,004                |

a. Estimation terminated at iteration number 7 because parameter estimates changed by less than ,001.

**Classification Table<sup>a</sup>**

| Observed           |                                | Predicted                      |                           |
|--------------------|--------------------------------|--------------------------------|---------------------------|
|                    |                                | handlt1 händelse larger than 1 | 0 ingen eller en händelse |
| Step 1             | handlt1 händelse larger than 1 | 12229                          | 0                         |
|                    | 0 ingen eller en händelse      | 246                            | 0                         |
| Overall Percentage |                                |                                |                           |

**Classification Table<sup>a</sup>**

| Observed           |                                | Predicted          |
|--------------------|--------------------------------|--------------------|
|                    |                                | Percentage Correct |
| Step 1             | handlt1 händelse larger than 1 | 100,0              |
|                    | 0 ingen eller en händelse      | ,0                 |
| Overall Percentage |                                | 98,0               |

a. The cut value is ,500

**Variables in the Equation**

|                         | B      | S.E. | Wald    | df | Sig. | Exp(B) | 95% C.I. for EXP(B) |       |
|-------------------------|--------|------|---------|----|------|--------|---------------------|-------|
|                         |        |      |         |    |      |        | Lower               | Upper |
| Step 1 <sup>a</sup> bv2 |        |      | 9,094   | 2  | ,011 |        |                     |       |
| bv2(1)                  | -,302  | ,183 | 2,706   | 1  | ,100 | ,740   | ,516                | 1,059 |
| bv2(2)                  | ,162   | ,163 | ,993    | 1  | ,319 | 1,176  | ,855                | 1,618 |
| Constant                | -3,887 | ,135 | 829,283 | 1  | ,000 | ,020   |                     |       |

a. Variable(s) entered on step 1: bv2.

```
LOGISTIC REGRESSION VARIABLES handlt1
/METHOD=ENTER bv3
/CONTRAST (bv3)=Indicator(1)
/PRINT=CI(95)
/CRITERIA=PIN(0.05) POUT(0.10) ITERATE(20) CUT(0.5).
```

**Block 1: Method = Enter**

**Omnibus Tests of Model Coefficients**

|             | Chi-square | df | Sig. |
|-------------|------------|----|------|
| Step 1 Step | 6,089      | 2  | ,048 |
| Block       | 6,089      | 2  | ,048 |
| Model       | 6,089      | 2  | ,048 |

**Model Summary**

| Step | -2 Log likelihood    | Cox & Snell R Square | Nagelkerke R Square |
|------|----------------------|----------------------|---------------------|
| 1    | 2412,69 <sup>a</sup> | ,000                 | ,003                |

a. Estimation terminated at iteration number 7 because parameter estimates changed by less than ,001.

**Classification Table<sup>a</sup>**

| Observed           |                                | Predicted                      |                      |   |
|--------------------|--------------------------------|--------------------------------|----------------------|---|
|                    |                                | handlt1 händelse larger than 1 |                      |   |
|                    |                                | 0 ingen eller en händelse      | 1 mer än en händelse |   |
| Step 1             | handlt1 händelse larger than 1 | 0 ingen eller en händelse      | 12229                | 0 |
|                    |                                | 1 mer än en händelse           | 246                  | 0 |
| Overall Percentage |                                |                                |                      |   |

**Classification Table<sup>a</sup>**

| Observed           |                                | Predicted          |
|--------------------|--------------------------------|--------------------|
|                    |                                | Percentage Correct |
| Step 1             | handlt1 händelse larger than 1 | 100,0              |
|                    |                                | ,0                 |
| Overall Percentage |                                | 98,0               |

a. The cut value is ,500

**Variables in the Equation**

|                         | B        | S.E.   | Wald  | df       | Sig. | Exp(B) | 95% C.I. for EXP(B) |       |       |
|-------------------------|----------|--------|-------|----------|------|--------|---------------------|-------|-------|
|                         |          |        |       |          |      |        | Lower               | Upper |       |
| Step 1 <sup>a</sup> bv3 |          |        | 5,206 | 2        | ,074 |        |                     |       |       |
|                         | bv3(1)   | -,558  | ,248  | 5,061    | 1    | ,024   | ,572                | ,352  | ,931  |
|                         | bv3(2)   | ,018   | ,178  | ,010     | 1    | ,919   | 1,018               | ,719  | 1,443 |
|                         | Constant | -3,856 | ,074  | 2751,458 | 1    | ,000   | ,021                |       |       |

a. Variable(s) entered on step 1: bv3.

```
LOGISTIC REGRESSION VARIABLES handlt1
/METHOD=ENTER sv3
/CONTRAST (sv3)=Indicator(1)
/PRINT=CI(95)
/CRITERIA=PIN(0.05) POUT(0.10) ITERATE(20) CUT(0.5).
```

**Block 1: Method = Enter**

**Omnibus Tests of Model Coefficients**

|        |       | Chi-square | df | Sig. |
|--------|-------|------------|----|------|
| Step 1 | Step  | 2,281      | 2  | ,320 |
|        | Block | 2,281      | 2  | ,320 |
|        | Model | 2,281      | 2  | ,320 |

**Model Summary**

| Step | -2 Log likelihood    | Cox & Snell R Square | Nagelkerke R Square |
|------|----------------------|----------------------|---------------------|
| 1    | 2416,50 <sup>a</sup> | ,000                 | ,001                |

a. Estimation terminated at iteration number 7 because parameter estimates changed by less than ,001.

**Classification Table<sup>a</sup>**

| Observed           |                                | Predicted                      |                           |
|--------------------|--------------------------------|--------------------------------|---------------------------|
|                    |                                | handlt1 händelse larger than 1 | 0 ingen eller en händelse |
| Step 1             | handlt1 händelse larger than 1 | 12229                          | 0                         |
|                    | 0 ingen eller en händelse      | 246                            | 0                         |
| Overall Percentage |                                |                                |                           |

**Classification Table<sup>a</sup>**

| Observed           |                                | Predicted          |
|--------------------|--------------------------------|--------------------|
|                    |                                | Percentage Correct |
| Step 1             | handlt1 händelse larger than 1 | 100,0              |
|                    | 0 ingen eller en händelse      | ,0                 |
| Overall Percentage |                                | 98,0               |

a. The cut value is ,500

**Variables in the Equation**

|                         | B      | S.E. | Wald    | df | Sig. | Exp(B) | 95% C.I. for EXP(B) |       |
|-------------------------|--------|------|---------|----|------|--------|---------------------|-------|
|                         |        |      |         |    |      |        | Lower               | Upper |
| Step 1 <sup>a</sup> sv3 |        |      | 2,244   | 2  | ,326 |        |                     |       |
| sv3(1)                  | -,229  | ,165 | 1,924   | 1  | ,165 | ,795   | ,576                | 1,099 |
| sv3(2)                  | -,050  | ,160 | ,097    | 1  | ,756 | ,952   | ,696                | 1,302 |
| Constant                | -3,806 | ,122 | 977,776 | 1  | ,000 | ,022   |                     |       |

a. Variable(s) entered on step 1: sv3.

```
LOGISTIC REGRESSION VARIABLES handlt1
/METHOD=ENTER sv5
/CONTRAST (sv5)=Indicator(1)
/PRINT=CI(95)
/CRITERIA=PIN(0.05) POUT(0.10) ITERATE(20) CUT(0.5).
```

**Block 1: Method = Enter**

**Omnibus Tests of Model Coefficients**

|             | Chi-square | df | Sig. |
|-------------|------------|----|------|
| Step 1 Step | 4,091      | 4  | ,394 |
| Block       | 4,091      | 4  | ,394 |
| Model       | 4,091      | 4  | ,394 |

**Model Summary**

| Step | -2 Log likelihood    | Cox & Snell R Square | Nagelkerke R Square |
|------|----------------------|----------------------|---------------------|
| 1    | 2414,69 <sup>a</sup> | ,000                 | ,002                |

a. Estimation terminated at iteration number 7 because parameter estimates changed by less than ,001.

Classification Table<sup>a</sup>

| Observed           |                                | Predicted                      |                      |
|--------------------|--------------------------------|--------------------------------|----------------------|
|                    |                                | handlt1 händelse larger than 1 |                      |
|                    |                                | 0 ingen eller en händelse      | 1 mer än en händelse |
| Step 1             | handlt1 händelse larger than 1 | 0 ingen eller en händelse      | 12229                |
|                    |                                | 1 mer än en händelse           | 246                  |
| Overall Percentage |                                |                                |                      |

Classification Table<sup>a</sup>

| Observed           |                                | Predicted                 |       |
|--------------------|--------------------------------|---------------------------|-------|
|                    |                                | Percentage Correct        |       |
| Step 1             | handlt1 händelse larger than 1 | 0 ingen eller en händelse | 100,0 |
|                    |                                | 1 mer än en händelse      | ,0    |
| Overall Percentage |                                |                           | 98,0  |

a. The cut value is ,500

Variables in the Equation

|                     | B        | S.E.   | Wald  | df      | Sig. | Exp(B) | 95% C.I. for EXP(B) |       |
|---------------------|----------|--------|-------|---------|------|--------|---------------------|-------|
|                     |          |        |       |         |      |        | Lower               | Upper |
| Step 1 <sup>a</sup> | sv5      |        | 3,932 | 4       | ,415 |        |                     |       |
|                     | sv5(1)   | -,352  | ,205  | 2,932   | 1    | ,087   | ,703                | 1,052 |
|                     | sv5(2)   | -,044  | ,226  | ,037    | 1    | ,847   | ,957                | 1,492 |
|                     | sv5(3)   | -,070  | ,213  | ,108    | 1    | ,743   | ,933                | 1,415 |
|                     | sv5(4)   | -,107  | ,203  | ,278    | 1    | ,598   | ,898                | 1,338 |
|                     | Constant | -3,769 | ,156  | 583,321 | 1    | ,000   | ,023                |       |

a. Variable(s) entered on step 1: sv5.

```
LOGISTIC REGRESSION VARIABLES handlt1
/METHOD=ENTER sv7
/CONTRAST (sv7)=Indicator(1)
/PRINT=CI(95)
/CRITERIA=PIN(0.05) POUT(0.10) ITERATE(20) CUT(0.5).
```

**Block 1: Method = Enter**

**Omnibus Tests of Model Coefficients**

|        |       | Chi-square | df | Sig. |
|--------|-------|------------|----|------|
| Step 1 | Step  | 5,503      | 6  | ,481 |
|        | Block | 5,503      | 6  | ,481 |
|        | Model | 5,503      | 6  | ,481 |

**Model Summary**

| Step | -2 Log likelihood    | Cox & Snell R Square | Nagelkerke R Square |
|------|----------------------|----------------------|---------------------|
| 1    | 2413,28 <sup>a</sup> | ,000                 | ,003                |

a. Estimation terminated at iteration number 7 because parameter estimates changed by less than ,001.

**Classification Table<sup>a</sup>**

|                    |                                | Predicted                      |                           |
|--------------------|--------------------------------|--------------------------------|---------------------------|
|                    |                                | handlt1 händelse larger than 1 | 0 ingen eller en händelse |
| Observed           | handlt1 händelse larger than 1 | 12229                          | 0                         |
|                    | 0 ingen eller en händelse      | 246                            | 0                         |
| Overall Percentage |                                |                                |                           |

**Classification Table<sup>a</sup>**

|                    |                                | Predicted          |
|--------------------|--------------------------------|--------------------|
| Observed           |                                | Percentage Correct |
| Step 1             | handlt1 händelse larger than 1 | 100,0              |
|                    | 0 ingen eller en händelse      | ,0                 |
| Overall Percentage |                                | 98,0               |

a. The cut value is ,500



**Variables in the Equation**

|                         | B      | S.E. | Wald    | df | Sig. | Exp(B) | 95% C.I. for EXP(B) |       |
|-------------------------|--------|------|---------|----|------|--------|---------------------|-------|
|                         |        |      |         |    |      |        | Lower               | Upper |
| Step 1 <sup>a</sup> sv7 |        |      | 5,277   | 6  | ,509 |        |                     |       |
| sv7(1)                  | -,335  | ,237 | 1,996   | 1  | ,158 | ,716   | ,450                | 1,138 |
| sv7(2)                  | -,086  | ,277 | ,096    | 1  | ,757 | ,918   | ,534                | 1,579 |
| sv7(3)                  | ,021   | ,268 | ,006    | 1  | ,938 | 1,021  | ,604                | 1,727 |
| sv7(4)                  | -,086  | ,265 | ,105    | 1  | ,746 | ,918   | ,545                | 1,544 |
| sv7(5)                  | ,116   | ,237 | ,239    | 1  | ,625 | 1,123  | ,705                | 1,788 |
| sv7(6)                  | ,000   | ,238 | ,000    | 1  | ,999 | 1,000  | ,627                | 1,595 |
| Constant                | -3,838 | ,185 | 432,595 | 1  | ,000 | ,022   |                     |       |

a. Variable(s) entered on step 1: sv7.

\*\*

LOGISTIC REGRESSION VARIABLES dod01

/METHOD=ENTER bv1

/CONTRAST (bv1)=Indicator(1)

/PRINT=CI(95)

/CRITERIA=PIN(0.05) POUT(0.10) ITERATE(20) CUT(0.5).

**Block 1: Method = Enter**

**Omnibus Tests of Model Coefficients**

|        |       | Chi-square | df | Sig. |
|--------|-------|------------|----|------|
| Step 1 | Step  | 66,252     | 2  | ,000 |
|        | Block | 66,252     | 2  | ,000 |
|        | Model | 66,252     | 2  | ,000 |

**Model Summary**

| Step | -2 Log likelihood    | Cox & Snell R Square | Nagelkerke R Square |
|------|----------------------|----------------------|---------------------|
| 1    | 4958,59 <sup>a</sup> | ,005                 | ,016                |

a. Estimation terminated at iteration number 6 because parameter estimates changed by less than ,001.

**Classification Table<sup>a</sup>**

| Observed           |                             | Predicted                   |                      |                    |       |
|--------------------|-----------------------------|-----------------------------|----------------------|--------------------|-------|
|                    |                             | dod01 dödsfall ja eller nej |                      | Percentage Correct |       |
|                    |                             | 0 inget dödsfall            | 1 minst ett dödsfall |                    |       |
| Step 1             | dod01 dödsfall ja eller nej | 0 inget dödsfall            | 11839                | 0                  | 100,0 |
|                    |                             | 1 minst ett dödsfall        | 636                  | 0                  | ,0    |
| Overall Percentage |                             |                             |                      |                    | 94,9  |

a. The cut value is ,500

**Variables in the Equation**

|                         | B        | S.E.   | Wald   | df       | Sig. | Exp(B) | 95% C.I. for EXP(B) |       |       |
|-------------------------|----------|--------|--------|----------|------|--------|---------------------|-------|-------|
|                         |          |        |        |          |      |        | Lower               | Upper |       |
| Step 1 <sup>a</sup> bv1 |          |        | 60,393 | 2        | ,000 |        |                     |       |       |
|                         | bv1(1)   | -,594  | ,123   | 23,445   | 1    | ,000   | ,552                | ,434  | ,702  |
|                         | bv1(2)   | ,350   | ,088   | 15,616   | 1    | ,000   | 1,418               | 1,193 | 1,687 |
|                         | Constant | -2,933 | ,062   | 2221,217 | 1    | ,000   | ,053                |       |       |

a. Variable(s) entered on step 1: bv1.

```
LOGISTIC REGRESSION VARIABLES dod01
/METHOD=ENTER bv2
/CONTRAST (bv2)=Indicator(1)
/PRINT=CI(95)
/CRITERIA=PIN(0.05) POUT(0.10) ITERATE(20) CUT(0.5).
```

## Block 1: Method = Enter

**Omnibus Tests of Model Coefficients**

|        |       | Chi-square | df | Sig. |
|--------|-------|------------|----|------|
| Step 1 | Step  | 55,598     | 2  | ,000 |
|        | Block | 55,598     | 2  | ,000 |
|        | Model | 55,598     | 2  | ,000 |

**Model Summary**

| Step | -2 Log likelihood    | Cox & Snell R Square | Nagelkerke R Square |
|------|----------------------|----------------------|---------------------|
| 1    | 4969,24 <sup>a</sup> | ,004                 | ,013                |

a. Estimation terminated at iteration number 6 because parameter estimates changed by less than ,001.

**Classification Table<sup>a</sup>**

| Observed           |                             | Predicted                   |                      |                    |       |
|--------------------|-----------------------------|-----------------------------|----------------------|--------------------|-------|
|                    |                             | dod01 dödsfall ja eller nej |                      | Percentage Correct |       |
|                    |                             | 0 inget dödsfall            | 1 minst ett dödsfall |                    |       |
| Step 1             | dod01 dödsfall ja eller nej | 0 inget dödsfall            | 11839                | 0                  | 100,0 |
|                    |                             | 1 minst ett dödsfall        | 636                  | 0                  | ,0    |
| Overall Percentage |                             |                             |                      |                    | 94,9  |

a. The cut value is ,500

**Variables in the Equation**

|                     | B        | S.E.   | Wald   | df       | Sig. | Exp(B) | 95% C.I. for EXP(B) |       |
|---------------------|----------|--------|--------|----------|------|--------|---------------------|-------|
|                     |          |        |        |          |      |        | Lower               | Upper |
| Step 1 <sup>a</sup> |          |        |        |          |      |        |                     |       |
|                     | bv2      |        | 52,418 | 2        | ,000 |        |                     |       |
|                     | bv2(1)   | -,407  | ,121   | 11,353   | ,001 | ,665   | ,525                | ,843  |
|                     | bv2(2)   | ,312   | ,103   | 9,131    | ,003 | 1,367  | 1,116               | 1,674 |
|                     | Constant | -2,955 | ,087   | 1145,421 | ,000 | ,052   |                     |       |

a. Variable(s) entered on step 1: bv2.

```
LOGISTIC REGRESSION VARIABLES dod01
/METHOD=ENTER bv3
/CONTRAST (bv3)=Indicator(1)
/PRINT=CI(95)
/CRITERIA=PIN(0.05) POUT(0.10) ITERATE(20) CUT(0.5).
```

**Block 1: Method = Enter**

### Omnibus Tests of Model Coefficients

|        |       | Chi-square | df | Sig. |
|--------|-------|------------|----|------|
| Step 1 | Step  | 56,679     | 2  | ,000 |
|        | Block | 56,679     | 2  | ,000 |
|        | Model | 56,679     | 2  | ,000 |

### Model Summary

| Step | -2 Log likelihood    | Cox & Snell R Square | Nagelkerke R Square |
|------|----------------------|----------------------|---------------------|
| 1    | 4968,16 <sup>a</sup> | ,005                 | ,014                |

a. Estimation terminated at iteration number 7 because parameter estimates changed by less than ,001.

### Classification Table<sup>a</sup>

| Observed           |                             | Predicted                   |                      |                    |       |
|--------------------|-----------------------------|-----------------------------|----------------------|--------------------|-------|
|                    |                             | dod01 dödsfall ja eller nej |                      | Percentage Correct |       |
|                    |                             | 0 inget dödsfall            | 1 minst ett dödsfall |                    |       |
| Step 1             | dod01 dödsfall ja eller nej | 0 inget dödsfall            | 11839                | 0                  | 100,0 |
|                    |                             | 1 minst ett dödsfall        | 636                  | 0                  | ,0    |
| Overall Percentage |                             |                             |                      |                    | 94,9  |

a. The cut value is ,500

### Variables in the Equation

|                     | B        | S.E.   | Wald   | df       | Sig. | Exp(B) | 95% C.I. for EXP(B) |       |
|---------------------|----------|--------|--------|----------|------|--------|---------------------|-------|
|                     |          |        |        |          |      |        | Lower               | Upper |
| Step 1 <sup>a</sup> |          |        |        |          |      |        |                     |       |
|                     | bv3      |        | 46,793 | 2        | ,000 |        |                     |       |
|                     | bv3(1)   | -,980  | ,190   | 26,502   | ,000 | ,375   | ,258                | ,545  |
|                     | bv3(2)   | ,390   | ,101   | 14,975   | ,000 | 1,476  | 1,212               | 1,798 |
|                     | Constant | -2,915 | ,047   | 3780,133 | ,000 | ,054   |                     |       |

a. Variable(s) entered on step 1: bv3.

```
LOGISTIC REGRESSION VARIABLES dod01
/METHOD=ENTER sv3
/CONTRAST (sv3)=Indicator(1)
```

/PRINT=CI(95)

/CRITERIA=PIN(0.05) POUT(0.10) ITERATE(20) CUT(0.5).

## Block 1: Method = Enter

### Omnibus Tests of Model Coefficients

|        |       | Chi-square | df | Sig. |
|--------|-------|------------|----|------|
| Step 1 | Step  | 66,069     | 2  | ,000 |
|        | Block | 66,069     | 2  | ,000 |
|        | Model | 66,069     | 2  | ,000 |

### Model Summary

| Step | -2 Log likelihood    | Cox & Snell R Square | Nagelkerke R Square |
|------|----------------------|----------------------|---------------------|
| 1    | 4958,77 <sup>a</sup> | ,005                 | ,016                |

a. Estimation terminated at iteration number 6 because parameter estimates changed by less than ,001.

### Classification Table<sup>a</sup>

| Observed           |                             | Predicted                   |                      |                    |       |
|--------------------|-----------------------------|-----------------------------|----------------------|--------------------|-------|
|                    |                             | dod01 dödsfall ja eller nej |                      | Percentage Correct |       |
|                    |                             | 0 inget dödsfall            | 1 minst ett dödsfall |                    |       |
| Step 1             | dod01 dödsfall ja eller nej | 0 inget dödsfall            | 11839                | 0                  | 100,0 |
|                    |                             | 1 minst ett dödsfall        | 636                  | 0                  | ,0    |
| Overall Percentage |                             |                             |                      |                    | 94,9  |

a. The cut value is ,500

### Variables in the Equation

|                     | B        | S.E.   | Wald   | df       | Sig. | Exp(B) | 95% C.I. for EXP(B) |       |       |
|---------------------|----------|--------|--------|----------|------|--------|---------------------|-------|-------|
|                     |          |        |        |          |      |        | Lower               | Upper |       |
| Step 1 <sup>a</sup> | sv3      |        | 59,299 | 2        | ,000 |        |                     |       |       |
|                     | sv3(1)   | -,754  | ,111   | 46,314   | 1    | ,000   | ,470                | ,379  | ,584  |
|                     | sv3(2)   | -,027  | ,095   | ,083     | 1    | ,773   | ,973                | ,808  | 1,172 |
|                     | Constant | -2,683 | ,073   | 1367,544 | 1    | ,000   | ,068                |       |       |

a. Variable(s) entered on step 1: sv3.

```

LOGISTIC REGRESSION VARIABLES dod01
/METHOD=ENTER sv5
/CONTRAST (sv5)=Indicator(1)
/PRINT=CI(95)
/CRITERIA=PIN(0.05) POUT(0.10) ITERATE(20) CUT(0.5).

```

## Block 1: Method = Enter

### Omnibus Tests of Model Coefficients

|        |       | Chi-square | df | Sig. |
|--------|-------|------------|----|------|
| Step 1 | Step  | 91,578     | 4  | ,000 |
|        | Block | 91,578     | 4  | ,000 |
|        | Model | 91,578     | 4  | ,000 |

### Model Summary

| Step | -2 Log likelihood    | Cox & Snell R Square | Nagelkerke R Square |
|------|----------------------|----------------------|---------------------|
| 1    | 4933,26 <sup>a</sup> | ,007                 | ,022                |

a. Estimation terminated at iteration number 6 because parameter estimates changed by less than ,001.

### Classification Table<sup>a</sup>

|                    |                             | Predicted                   |                      |                    |
|--------------------|-----------------------------|-----------------------------|----------------------|--------------------|
|                    |                             | dod01 dödsfall ja eller nej |                      | Percentage Correct |
| Observed           |                             | 0 inget dödsfall            | 1 minst ett dödsfall |                    |
| Step 1             | dod01 dödsfall ja eller nej | 0 inget dödsfall            | 1 minst ett dödsfall | 100,0              |
|                    |                             | 11839                       | 0                    | ,0                 |
|                    |                             | 636                         | 0                    | ,0                 |
| Overall Percentage |                             |                             |                      | 94,9               |

a. The cut value is ,500

**Variables in the Equation**

|                         | B      | S.E. | Wald    | df | Sig. | Exp(B) | 95% C.I. for EXP(B) |       |
|-------------------------|--------|------|---------|----|------|--------|---------------------|-------|
|                         |        |      |         |    |      |        | Lower               | Upper |
| Step 1 <sup>a</sup> sv5 |        |      | 75,882  | 4  | ,000 |        |                     |       |
| sv5(1)                  | -1,026 | ,144 | 50,528  | 1  | ,000 | ,359   | ,270                | ,476  |
| sv5(2)                  | -,176  | ,141 | 1,557   | 1  | ,212 | ,838   | ,636                | 1,106 |
| sv5(3)                  | ,096   | ,124 | ,602    | 1  | ,438 | 1,101  | ,863                | 1,405 |
| sv5(4)                  | -,121  | ,123 | ,962    | 1  | ,327 | ,886   | ,696                | 1,128 |
| Constant                | -2,676 | ,094 | 803,889 | 1  | ,000 | ,069   |                     |       |

a. Variable(s) entered on step 1: sv5.

```
LOGISTIC REGRESSION VARIABLES dod01
/METHOD=ENTER sv7
/CONTRAST (sv7)=Indicator(1)
/PRINT=CI(95)
/CRITERIA=PIN(0.05) POUT(0.10) ITERATE(20) CUT(0.5).
```

**Block 1: Method = Enter**

**Omnibus Tests of Model Coefficients**

|        |       | Chi-square | df | Sig. |
|--------|-------|------------|----|------|
| Step 1 | Step  | 130,180    | 6  | ,000 |
|        | Block | 130,180    | 6  | ,000 |
|        | Model | 130,180    | 6  | ,000 |

**Model Summary**

| Step | -2 Log likelihood    | Cox & Snell R Square | Nagelkerke R Square |
|------|----------------------|----------------------|---------------------|
| 1    | 4894,66 <sup>a</sup> | ,010                 | ,031                |

a. Estimation terminated at iteration number 7 because parameter estimates changed by less than ,001.

**Classification Table<sup>a</sup>**

| Observed           |                             |                      | Predicted                   |                      |                    |
|--------------------|-----------------------------|----------------------|-----------------------------|----------------------|--------------------|
|                    |                             |                      | dod01 dödsfall ja eller nej |                      | Percentage Correct |
|                    |                             |                      | 0 inget dödsfall            | 1 minst ett dödsfall |                    |
| Step 1             | dod01 dödsfall ja eller nej | 0 inget dödsfall     | 11839                       | 0                    | 100,0              |
|                    |                             | 1 minst ett dödsfall | 636                         | 0                    | ,0                 |
| Overall Percentage |                             |                      |                             |                      | 94,9               |

a. The cut value is ,500

**Variables in the Equation**

|                         | B      | S.E. | Wald    | df | Sig. | Exp(B) | 95% C.I. for EXP(B) |       |
|-------------------------|--------|------|---------|----|------|--------|---------------------|-------|
|                         |        |      |         |    |      |        | Lower               | Upper |
| Step 1 <sup>a</sup> sv7 |        |      | 96,884  | 6  | ,000 |        |                     |       |
| sv7(1)                  | -1,292 | ,179 | 52,022  | 1  | ,000 | ,275   | ,193                | ,390  |
| sv7(2)                  | ,001   | ,164 | ,000    | 1  | ,996 | 1,001  | ,726                | 1,380 |
| sv7(3)                  | -,043  | ,165 | ,067    | 1  | ,795 | ,958   | ,693                | 1,324 |
| sv7(4)                  | ,200   | ,151 | 1,740   | 1  | ,187 | 1,221  | ,908                | 1,642 |
| sv7(5)                  | ,221   | ,142 | 2,431   | 1  | ,119 | 1,247  | ,945                | 1,646 |
| sv7(6)                  | -,196  | ,150 | 1,705   | 1  | ,192 | ,822   | ,613                | 1,103 |
| Constant                | -2,756 | ,112 | 607,179 | 1  | ,000 | ,064   |                     |       |

a. Variable(s) entered on step 1: sv7.



COMMENT körs på abo\_bjo\_vasa\_v1.sav

COMMENT med kontroll för VASTY2 (i stället för VASTY, som användes i bara-vasa-varianten)

COMMENT läses i Table 2 som första kolumnen, sex modeller, andra kolumnen, sex modeller, osv

\*\*

LOGISTIC REGRESSION VARIABLES hand01

/METHOD=ENTER bv1 VASTY2

/CONTRAST (bv1)=Indicator(1)

/CONTRAST (VASTY2)=Indicator(1)

/PRINT=CI(95)

/CRITERIA=PIN(0.05) POUT(0.10) ITERATE(20) CUT(0.5).

## Block 1: Method = Enter

### Omnibus Tests of Model Coefficients

|        |       | Chi-square | df | Sig. |
|--------|-------|------------|----|------|
| Step 1 | Step  | 572,673    | 37 | ,000 |
|        | Block | 572,673    | 37 | ,000 |
|        | Model | 572,673    | 37 | ,000 |

### Model Summary

| Step | -2 Log likelihood    | Cox & Snell R Square | Nagelkerke R Square |
|------|----------------------|----------------------|---------------------|
| 1    | 8050,91 <sup>a</sup> | ,045                 | ,090                |

a. Estimation terminated at iteration number 6 because parameter estimates changed by less than ,001.

Classification Table<sup>a</sup>

| Observed           |                              | Predicted                    |                     |                    |       |
|--------------------|------------------------------|------------------------------|---------------------|--------------------|-------|
|                    |                              | hand01 händelse nej eller ja |                     | Percentage Correct |       |
|                    |                              | 0 ingen händelse             | 1 minst en händelse |                    |       |
| Step 1             | hand01 händelse nej eller ja | 0 ingen händelse             | 11108               | 0                  | 100,0 |
|                    |                              | 1 minst en händelse          | 1367                | 0                  | ,0    |
| Overall Percentage |                              |                              |                     |                    | 89,0  |

a. The cut value is ,500

Variables in the Equation

|                         | B      | S.E. | Wald    | df | Sig. | Exp(B) | 95% C.I. for EXP(B) |       |
|-------------------------|--------|------|---------|----|------|--------|---------------------|-------|
|                         |        |      |         |    |      |        | Lower               | Upper |
| Step 1 <sup>a</sup> bv1 |        |      | 33,531  | 2  | ,000 |        |                     |       |
|                         | -,273  | ,084 | 10,589  | 1  | ,001 | ,761   | ,646                | ,897  |
|                         | ,236   | ,069 | 11,724  | 1  | ,001 | 1,267  | 1,106               | 1,450 |
| VASTY2                  |        |      | 430,566 | 35 | ,000 |        |                     |       |
| VASTY2(1)               | ,335   | ,240 | 1,952   | 1  | ,162 | 1,398  | ,874                | 2,237 |
| VASTY2(2)               | 1,183  | ,216 | 29,867  | 1  | ,000 | 3,264  | 2,136               | 4,990 |
| VASTY2(3)               | -,863  | ,304 | 8,076   | 1  | ,004 | ,422   | ,233                | ,765  |
| VASTY2(4)               | ,149   | ,243 | ,373    | 1  | ,541 | 1,160  | ,720                | 1,869 |
| VASTY2(5)               | -,382  | ,282 | 1,835   | 1  | ,176 | ,682   | ,393                | 1,186 |
| VASTY2(6)               | -1,058 | ,328 | 10,418  | 1  | ,001 | ,347   | ,183                | ,660  |
| VASTY2(7)               | 1,041  | ,220 | 22,367  | 1  | ,000 | 2,831  | 1,839               | 4,357 |
| VASTY2(8)               | ,251   | ,240 | 1,091   | 1  | ,296 | 1,285  | ,803                | 2,058 |
| VASTY2(9)               | ,187   | ,246 | ,575    | 1  | ,448 | 1,205  | ,744                | 1,953 |
| VASTY2(10)              | 1,007  | ,219 | 21,086  | 1  | ,000 | 2,737  | 1,781               | 4,205 |
| VASTY2(11)              | ,871   | ,223 | 15,290  | 1  | ,000 | 2,390  | 1,544               | 3,699 |
| VASTY2(12)              | ,073   | ,248 | ,087    | 1  | ,768 | 1,076  | ,662                | 1,749 |
| VASTY2(13)              | ,747   | ,224 | 11,090  | 1  | ,001 | 2,110  | 1,360               | 3,275 |
| VASTY2(14)              | -,305  | ,268 | 1,298   | 1  | ,255 | ,737   | ,436                | 1,246 |
| VASTY2(15)              | ,225   | ,242 | ,868    | 1  | ,351 | 1,253  | ,780                | 2,013 |
| VASTY2(16)              | ,339   | ,288 | 1,382   | 1  | ,240 | 1,403  | ,798                | 2,468 |
| VASTY2(17)              | -1,178 | ,356 | 10,981  | 1  | ,001 | ,308   | ,153                | ,618  |
| VASTY2(18)              | -,881  | ,320 | 7,585   | 1  | ,006 | ,414   | ,221                | ,776  |
| VASTY2(19)              | -1,194 | ,386 | 9,555   | 1  | ,002 | ,303   | ,142                | ,646  |
| VASTY2(20)              | ,059   | ,261 | ,051    | 1  | ,821 | 1,061  | ,636                | 1,770 |
| VASTY2(21)              | -,188  | ,263 | ,512    | 1  | ,474 | ,829   | ,495                | 1,387 |
| VASTY2(22)              | ,160   | ,252 | ,400    | 1  | ,527 | 1,173  | ,715                | 1,924 |
| VASTY2(23)              | ,731   | ,228 | 10,316  | 1  | ,001 | 2,077  | 1,330               | 3,245 |
| VASTY2(24)              | ,530   | ,230 | 5,313   | 1  | ,021 | 1,699  | 1,083               | 2,666 |
| VASTY2(25)              | ,123   | ,264 | ,216    | 1  | ,642 | 1,131  | ,674                | 1,897 |

**Variables in the Equation**

|            | B      | S.E. | Wald    | df | Sig. | Exp(B) | 95% C.I. for EXP(B) |       |
|------------|--------|------|---------|----|------|--------|---------------------|-------|
|            |        |      |         |    |      |        | Lower               | Upper |
| VASTY2(26) | -,864  | ,337 | 6,584   | 1  | ,010 | ,421   | ,218                | ,815  |
| VASTY2(27) | -1,303 | ,356 | 13,384  | 1  | ,000 | ,272   | ,135                | ,546  |
| VASTY2(28) | -,918  | ,371 | 6,121   | 1  | ,013 | ,399   | ,193                | ,826  |
| VASTY2(29) | -,942  | ,320 | 8,679   | 1  | ,003 | ,390   | ,208                | ,730  |
| VASTY2(30) | ,003   | ,252 | ,000    | 1  | ,991 | 1,003  | ,612                | 1,643 |
| VASTY2(31) | ,518   | ,233 | 4,927   | 1  | ,026 | 1,679  | 1,062               | 2,652 |
| VASTY2(32) | -,020  | ,259 | ,006    | 1  | ,939 | ,980   | ,590                | 1,630 |
| VASTY2(33) | -,013  | ,257 | ,002    | 1  | ,961 | ,987   | ,596                | 1,635 |
| VASTY2(34) | -1,557 | ,401 | 15,103  | 1  | ,000 | ,211   | ,096                | ,462  |
| VASTY2(35) | ,348   | ,244 | 2,032   | 1  | ,154 | 1,416  | ,878                | 2,284 |
| Constant   | -2,236 | ,182 | 150,660 | 1  | ,000 | ,107   |                     |       |

a. Variable(s) entered on step 1: bv1, VASTY2.

```
LOGISTIC REGRESSION VARIABLES hand01
/METHOD=ENTER bv2 VASTY2
/CONTRAST (bv2)=Indicator(1)
/CONTRAST (VASTY2)=Indicator(1)
/PRINT=CI(95)
/CRITERIA=PIN(0.05) POUT(0.10) ITERATE(20) CUT(0.5).
```

**Block 1: Method = Enter**

**Omnibus Tests of Model Coefficients**

|        |       | Chi-square | df | Sig. |
|--------|-------|------------|----|------|
| Step 1 | Step  | 561,168    | 37 | ,000 |
|        | Block | 561,168    | 37 | ,000 |
|        | Model | 561,168    | 37 | ,000 |

**Model Summary**

| Step | -2 Log likelihood    | Cox & Snell R Square | Nagelkerke R Square |
|------|----------------------|----------------------|---------------------|
| 1    | 8062,41 <sup>a</sup> | ,044                 | ,088                |

a. Estimation terminated at iteration number 6 because parameter estimates changed by less than ,001.

Classification Table<sup>a</sup>

| Observed           |                              | Predicted                    |                     |                    |       |
|--------------------|------------------------------|------------------------------|---------------------|--------------------|-------|
|                    |                              | hand01 händelse nej eller ja |                     | Percentage Correct |       |
|                    |                              | 0 ingen händelse             | 1 minst en händelse |                    |       |
| Step 1             | hand01 händelse nej eller ja | 0 ingen händelse             | 11108               | 0                  | 100,0 |
|                    |                              | 1 minst en händelse          | 1367                | 0                  | ,0    |
| Overall Percentage |                              |                              |                     |                    | 89,0  |

a. The cut value is ,500

Variables in the Equation

|                         | B      | S.E. | Wald    | df | Sig. | Exp(B) | 95% C.I. for EXP(B) |       |
|-------------------------|--------|------|---------|----|------|--------|---------------------|-------|
|                         |        |      |         |    |      |        | Lower               | Upper |
| Step 1 <sup>a</sup> bv2 |        |      | 22,320  | 2  | ,000 |        |                     |       |
|                         | -,194  | ,084 | 5,283   | 1  | ,022 | ,824   | ,698                | ,972  |
|                         | ,157   | ,077 | 4,191   | 1  | ,041 | 1,170  | 1,007               | 1,360 |
| VASTY2                  |        |      | 433,569 | 35 | ,000 |        |                     |       |
| VASTY2(1)               | ,327   | ,240 | 1,865   | 1  | ,172 | 1,387  | ,867                | 2,220 |
| VASTY2(2)               | 1,187  | ,216 | 30,073  | 1  | ,000 | 3,277  | 2,144               | 5,009 |
| VASTY2(3)               | -,816  | ,303 | 7,252   | 1  | ,007 | ,442   | ,244                | ,801  |
| VASTY2(4)               | ,181   | ,243 | ,557    | 1  | ,455 | 1,199  | ,745                | 1,929 |
| VASTY2(5)               | -,372  | ,282 | 1,741   | 1  | ,187 | ,689   | ,397                | 1,198 |
| VASTY2(6)               | -1,022 | ,327 | 9,750   | 1  | ,002 | ,360   | ,189                | ,683  |
| VASTY2(7)               | 1,088  | ,219 | 24,651  | 1  | ,000 | 2,967  | 1,932               | 4,559 |
| VASTY2(8)               | ,259   | ,240 | 1,162   | 1  | ,281 | 1,296  | ,809                | 2,075 |
| VASTY2(9)               | ,201   | ,246 | ,664    | 1  | ,415 | 1,222  | ,754                | 1,980 |
| VASTY2(10)              | 1,018  | ,219 | 21,559  | 1  | ,000 | 2,767  | 1,801               | 4,252 |
| VASTY2(11)              | ,882   | ,223 | 15,690  | 1  | ,000 | 2,415  | 1,561               | 3,736 |
| VASTY2(12)              | ,084   | ,248 | ,115    | 1  | ,735 | 1,088  | ,669                | 1,768 |
| VASTY2(13)              | ,771   | ,224 | 11,820  | 1  | ,001 | 2,162  | 1,393               | 3,355 |
| VASTY2(14)              | -,289  | ,268 | 1,166   | 1  | ,280 | ,749   | ,443                | 1,265 |
| VASTY2(15)              | ,226   | ,242 | ,874    | 1  | ,350 | 1,254  | ,780                | 2,015 |
| VASTY2(16)              | ,353   | ,288 | 1,507   | 1  | ,220 | 1,424  | ,810                | 2,502 |
| VASTY2(17)              | -1,172 | ,356 | 10,874  | 1  | ,001 | ,310   | ,154                | ,622  |
| VASTY2(18)              | -,876  | ,320 | 7,506   | 1  | ,006 | ,416   | ,223                | ,779  |
| VASTY2(19)              | -1,252 | ,385 | 10,579  | 1  | ,001 | ,286   | ,135                | ,608  |
| VASTY2(20)              | ,088   | ,261 | ,114    | 1  | ,736 | 1,092  | ,655                | 1,820 |
| VASTY2(21)              | -,179  | ,263 | ,464    | 1  | ,496 | ,836   | ,500                | 1,399 |
| VASTY2(22)              | ,156   | ,253 | ,383    | 1  | ,536 | 1,169  | ,713                | 1,918 |
| VASTY2(23)              | ,723   | ,227 | 10,093  | 1  | ,001 | 2,060  | 1,319               | 3,218 |
| VASTY2(24)              | ,564   | ,230 | 6,034   | 1  | ,014 | 1,758  | 1,121               | 2,758 |
| VASTY2(25)              | ,128   | ,264 | ,234    | 1  | ,628 | 1,136  | ,677                | 1,907 |

**Variables in the Equation**

|            | B      | S.E. | Wald    | df | Sig. | Exp(B) | 95% C.I. for EXP(B) |       |
|------------|--------|------|---------|----|------|--------|---------------------|-------|
|            |        |      |         |    |      |        | Lower               | Upper |
| VASTY2(26) | -,852  | ,337 | 6,410   | 1  | ,011 | ,426   | ,220                | ,825  |
| VASTY2(27) | -1,284 | ,356 | 13,006  | 1  | ,000 | ,277   | ,138                | ,556  |
| VASTY2(28) | -,907  | ,371 | 5,970   | 1  | ,015 | ,404   | ,195                | ,836  |
| VASTY2(29) | -,923  | ,320 | 8,342   | 1  | ,004 | ,397   | ,212                | ,743  |
| VASTY2(30) | ,019   | ,252 | ,005    | 1  | ,941 | 1,019  | ,622                | 1,669 |
| VASTY2(31) | ,527   | ,233 | 5,125   | 1  | ,024 | 1,694  | 1,073               | 2,674 |
| VASTY2(32) | -,025  | ,259 | ,010    | 1  | ,922 | ,975   | ,587                | 1,620 |
| VASTY2(33) | -,014  | ,257 | ,003    | 1  | ,957 | ,986   | ,596                | 1,632 |
| VASTY2(34) | -1,546 | ,401 | 14,904  | 1  | ,000 | ,213   | ,097                | ,467  |
| VASTY2(35) | ,390   | ,243 | 2,571   | 1  | ,109 | 1,477  | ,917                | 2,379 |
| Constant   | -2,238 | ,187 | 143,934 | 1  | ,000 | ,107   |                     |       |

a. Variable(s) entered on step 1: bv2, VASTY2.

```
LOGISTIC REGRESSION VARIABLES hand01
/METHOD=ENTER bv3 VASTY2
/CONTRAST (bv3)=Indicator(1)
/CONTRAST (VASTY2)=Indicator(1)
/PRINT=CI(95)
/CRITERIA=PIN(0.05) POUT(0.10) ITERATE(20) CUT(0.5).
```

**Block 1: Method = Enter**

**Omnibus Tests of Model Coefficients**

|        |       | Chi-square | df | Sig. |
|--------|-------|------------|----|------|
| Step 1 | Step  | 563,072    | 37 | ,000 |
|        | Block | 563,072    | 37 | ,000 |
|        | Model | 563,072    | 37 | ,000 |

**Model Summary**

| Step | -2 Log likelihood    | Cox & Snell R Square | Nagelkerke R Square |
|------|----------------------|----------------------|---------------------|
| 1    | 8060,51 <sup>a</sup> | ,044                 | ,088                |

a. Estimation terminated at iteration number 6 because parameter estimates changed by less than ,001.

Classification Table<sup>a</sup>

| Observed           |                              | Predicted                    |                     |                    |       |
|--------------------|------------------------------|------------------------------|---------------------|--------------------|-------|
|                    |                              | hand01 händelse nej eller ja |                     | Percentage Correct |       |
|                    |                              | 0 ingen händelse             | 1 minst en händelse |                    |       |
| Step 1             | hand01 händelse nej eller ja | 0 ingen händelse             | 11108               | 0                  | 100,0 |
|                    |                              | 1 minst en händelse          | 1367                | 0                  | ,0    |
| Overall Percentage |                              |                              |                     |                    | 89,0  |

a. The cut value is ,500

Variables in the Equation

|                         | B      | S.E. | Wald    | df | Sig. | Exp(B) | 95% C.I. for EXP(B) |       |
|-------------------------|--------|------|---------|----|------|--------|---------------------|-------|
|                         |        |      |         |    |      |        | Lower               | Upper |
| Step 1 <sup>a</sup> bv3 |        |      | 23,032  | 2  | ,000 |        |                     |       |
|                         | -,459  | ,117 | 15,260  | 1  | ,000 | ,632   | ,502                | ,796  |
|                         | ,190   | ,083 | 5,198   | 1  | ,023 | 1,209  | 1,027               | 1,424 |
| VASTY2                  |        |      | 434,065 | 35 | ,000 |        |                     |       |
| VASTY2(1)               | ,380   | ,240 | 2,505   | 1  | ,113 | 1,462  | ,914                | 2,339 |
| VASTY2(2)               | 1,217  | ,216 | 31,701  | 1  | ,000 | 3,378  | 2,211               | 5,160 |
| VASTY2(3)               | -,782  | ,303 | 6,655   | 1  | ,010 | ,457   | ,253                | ,829  |
| VASTY2(4)               | ,209   | ,243 | ,740    | 1  | ,390 | 1,233  | ,766                | 1,984 |
| VASTY2(5)               | -,338  | ,282 | 1,439   | 1  | ,230 | ,713   | ,411                | 1,239 |
| VASTY2(6)               | -1,001 | ,328 | 9,317   | 1  | ,002 | ,368   | ,193                | ,699  |
| VASTY2(7)               | 1,105  | ,221 | 24,884  | 1  | ,000 | 3,019  | 1,956               | 4,660 |
| VASTY2(8)               | ,304   | ,240 | 1,612   | 1  | ,204 | 1,356  | ,847                | 2,169 |
| VASTY2(9)               | ,248   | ,246 | 1,014   | 1  | ,314 | 1,281  | ,791                | 2,074 |
| VASTY2(10)              | 1,050  | ,219 | 23,059  | 1  | ,000 | 2,859  | 1,862               | 4,390 |
| VASTY2(11)              | ,907   | ,223 | 16,604  | 1  | ,000 | 2,478  | 1,601               | 3,833 |
| VASTY2(12)              | ,124   | ,247 | ,250    | 1  | ,617 | 1,132  | ,697                | 1,838 |
| VASTY2(13)              | ,841   | ,223 | 14,230  | 1  | ,000 | 2,319  | 1,498               | 3,590 |
| VASTY2(14)              | -,246  | ,267 | ,845    | 1  | ,358 | ,782   | ,463                | 1,321 |
| VASTY2(15)              | ,268   | ,242 | 1,228   | 1  | ,268 | 1,307  | ,814                | 2,099 |
| VASTY2(16)              | ,365   | ,289 | 1,600   | 1  | ,206 | 1,441  | ,818                | 2,538 |
| VASTY2(17)              | -1,180 | ,355 | 11,026  | 1  | ,001 | ,307   | ,153                | ,617  |
| VASTY2(18)              | -,861  | ,320 | 7,248   | 1  | ,007 | ,423   | ,226                | ,791  |
| VASTY2(19)              | -1,136 | ,388 | 8,571   | 1  | ,003 | ,321   | ,150                | ,687  |
| VASTY2(20)              | ,115   | ,261 | ,195    | 1  | ,658 | 1,122  | ,673                | 1,872 |
| VASTY2(21)              | -,156  | ,262 | ,353    | 1  | ,552 | ,856   | ,512                | 1,431 |
| VASTY2(22)              | ,112   | ,252 | ,197    | 1  | ,657 | 1,118  | ,683                | 1,832 |
| VASTY2(23)              | ,738   | ,228 | 10,514  | 1  | ,001 | 2,091  | 1,339               | 3,267 |
| VASTY2(24)              | ,588   | ,230 | 6,550   | 1  | ,010 | 1,800  | 1,148               | 2,823 |
| VASTY2(25)              | ,147   | ,264 | ,311    | 1  | ,577 | 1,159  | ,690                | 1,945 |

**Variables in the Equation**

|            | B      | S.E. | Wald    | df | Sig. | Exp(B) | 95% C.I. for EXP(B) |       |
|------------|--------|------|---------|----|------|--------|---------------------|-------|
|            |        |      |         |    |      |        | Lower               | Upper |
| VASTY2(26) | -,806  | ,337 | 5,742   | 1  | ,017 | ,446   | ,231                | ,863  |
| VASTY2(27) | -1,231 | ,356 | 11,964  | 1  | ,001 | ,292   | ,145                | ,587  |
| VASTY2(28) | -,842  | ,370 | 5,165   | 1  | ,023 | ,431   | ,208                | ,891  |
| VASTY2(29) | -,916  | ,319 | 8,224   | 1  | ,004 | ,400   | ,214                | ,748  |
| VASTY2(30) | ,018   | ,252 | ,005    | 1  | ,943 | 1,018  | ,622                | 1,667 |
| VASTY2(31) | ,581   | ,234 | 6,147   | 1  | ,013 | 1,787  | 1,129               | 2,828 |
| VASTY2(32) | ,037   | ,260 | ,020    | 1  | ,888 | 1,037  | ,623                | 1,728 |
| VASTY2(33) | ,045   | ,258 | ,031    | 1  | ,860 | 1,046  | ,631                | 1,734 |
| VASTY2(34) | -1,535 | ,400 | 14,698  | 1  | ,000 | ,215   | ,098                | ,472  |
| VASTY2(35) | ,411   | ,244 | 2,829   | 1  | ,093 | 1,508  | ,934                | 2,435 |
| Constant   | -2,246 | ,180 | 155,166 | 1  | ,000 | ,106   |                     |       |

a. Variable(s) entered on step 1: bv3, VASTY2.

LOGISTIC REGRESSION VARIABLES hand01

/METHOD=ENTER sv3 VASTY2

/CONTRAST (sv3)=Indicator(1)

/CONTRAST (VASTY2)=Indicator(1)

/PRINT=CI(95)

/CRITERIA=PIN(0.05) POUT(0.10) ITERATE(20) CUT(0.5).

**Block 1: Method = Enter**

**Omnibus Tests of Model Coefficients**

|        |       | Chi-square | df | Sig. |
|--------|-------|------------|----|------|
| Step 1 | Step  | 550,088    | 37 | ,000 |
|        | Block | 550,088    | 37 | ,000 |
|        | Model | 550,088    | 37 | ,000 |

**Model Summary**

| Step | -2 Log likelihood    | Cox & Snell R Square | Nagelkerke R Square |
|------|----------------------|----------------------|---------------------|
| 1    | 8073,49 <sup>a</sup> | ,043                 | ,086                |

a. Estimation terminated at iteration number 6 because parameter estimates changed by less than ,001.

Classification Table<sup>a</sup>

| Observed           |                              | Predicted                    |                     |                    |       |
|--------------------|------------------------------|------------------------------|---------------------|--------------------|-------|
|                    |                              | hand01 händelse nej eller ja |                     | Percentage Correct |       |
|                    |                              | 0 ingen händelse             | 1 minst en händelse |                    |       |
| Step 1             | hand01 händelse nej eller ja | 0 ingen händelse             | 11108               | 0                  | 100,0 |
|                    |                              | 1 minst en händelse          | 1367                | 0                  | ,0    |
| Overall Percentage |                              |                              |                     |                    | 89,0  |

a. The cut value is ,500

Variables in the Equation

|                         | B      | S.E. | Wald    | df | Sig. | Exp(B) | 95% C.I. for EXP(B) |       |
|-------------------------|--------|------|---------|----|------|--------|---------------------|-------|
|                         |        |      |         |    |      |        | Lower               | Upper |
| Step 1 <sup>a</sup> sv3 |        |      | 11,508  | 2  | ,003 |        |                     |       |
| sv3(1)                  | -,161  | ,085 | 3,579   | 1  | ,059 | ,851   | ,720                | 1,006 |
| sv3(2)                  | ,150   | ,083 | 3,287   | 1  | ,070 | 1,162  | ,988                | 1,367 |
| VASTY2                  |        |      | 430,840 | 35 | ,000 |        |                     |       |
| VASTY2(1)               | ,306   | ,240 | 1,621   | 1  | ,203 | 1,358  | ,848                | 2,176 |
| VASTY2(2)               | 1,125  | ,219 | 26,358  | 1  | ,000 | 3,081  | 2,005               | 4,734 |
| VASTY2(3)               | -,648  | ,302 | 4,609   | 1  | ,032 | ,523   | ,290                | ,945  |
| VASTY2(4)               | ,318   | ,242 | 1,726   | 1  | ,189 | 1,374  | ,855                | 2,207 |
| VASTY2(5)               | -,228  | ,283 | ,652    | 1  | ,419 | ,796   | ,457                | 1,385 |
| VASTY2(6)               | -1,074 | ,330 | 10,579  | 1  | ,001 | ,342   | ,179                | ,653  |
| VASTY2(7)               | 1,262  | ,217 | 33,909  | 1  | ,000 | 3,534  | 2,311               | 5,405 |
| VASTY2(8)               | ,400   | ,240 | 2,777   | 1  | ,096 | 1,492  | ,932                | 2,390 |
| VASTY2(9)               | ,285   | ,245 | 1,350   | 1  | ,245 | 1,330  | ,822                | 2,152 |
| VASTY2(10)              | ,957   | ,223 | 18,428  | 1  | ,000 | 2,605  | 1,682               | 4,032 |
| VASTY2(11)              | ,916   | ,222 | 16,937  | 1  | ,000 | 2,498  | 1,615               | 3,863 |
| VASTY2(12)              | ,048   | ,250 | ,037    | 1  | ,847 | 1,049  | ,643                | 1,712 |
| VASTY2(13)              | ,773   | ,227 | 11,569  | 1  | ,001 | 2,165  | 1,387               | 3,379 |
| VASTY2(14)              | -,288  | ,268 | 1,154   | 1  | ,283 | ,750   | ,443                | 1,268 |
| VASTY2(15)              | ,181   | ,245 | ,545    | 1  | ,460 | 1,198  | ,742                | 1,934 |
| VASTY2(16)              | ,364   | ,288 | 1,601   | 1  | ,206 | 1,440  | ,819                | 2,531 |
| VASTY2(17)              | -1,150 | ,356 | 10,442  | 1  | ,001 | ,317   | ,158                | ,636  |
| VASTY2(18)              | -,708  | ,325 | 4,757   | 1  | ,029 | ,493   | ,261                | ,931  |
| VASTY2(19)              | -1,244 | ,387 | 10,321  | 1  | ,001 | ,288   | ,135                | ,616  |
| VASTY2(20)              | ,090   | ,261 | ,118    | 1  | ,731 | 1,094  | ,656                | 1,825 |
| VASTY2(21)              | -,091  | ,263 | ,121    | 1  | ,728 | ,913   | ,545                | 1,527 |
| VASTY2(22)              | ,062   | ,252 | ,061    | 1  | ,804 | 1,064  | ,650                | 1,743 |
| VASTY2(23)              | ,736   | ,228 | 10,476  | 1  | ,001 | 2,089  | 1,337               | 3,262 |
| VASTY2(24)              | ,621   | ,229 | 7,361   | 1  | ,007 | 1,861  | 1,188               | 2,915 |
| VASTY2(25)              | ,178   | ,265 | ,452    | 1  | ,502 | 1,195  | ,711                | 2,007 |



**Variables in the Equation**

|            | B      | S.E. | Wald    | df | Sig. | Exp(B) | 95% C.I. for EXP(B) |       |
|------------|--------|------|---------|----|------|--------|---------------------|-------|
|            |        |      |         |    |      |        | Lower               | Upper |
| VASTY2(26) | -,800  | ,336 | 5,652   | 1  | ,017 | ,450   | ,233                | ,869  |
| VASTY2(27) | -1,284 | ,357 | 12,956  | 1  | ,000 | ,277   | ,138                | ,557  |
| VASTY2(28) | -,941  | ,374 | 6,328   | 1  | ,012 | ,390   | ,188                | ,812  |
| VASTY2(29) | -1,029 | ,324 | 10,101  | 1  | ,001 | ,357   | ,189                | ,674  |
| VASTY2(30) | ,127   | ,253 | ,251    | 1  | ,616 | 1,135  | ,692                | 1,862 |
| VASTY2(31) | ,684   | ,238 | 8,295   | 1  | ,004 | 1,983  | 1,244               | 3,159 |
| VASTY2(32) | ,107   | ,265 | ,163    | 1  | ,687 | 1,113  | ,662                | 1,870 |
| VASTY2(33) | ,132   | ,263 | ,250    | 1  | ,617 | 1,141  | ,681                | 1,910 |
| VASTY2(34) | -1,514 | ,400 | 14,299  | 1  | ,000 | ,220   | ,100                | ,482  |
| VASTY2(35) | ,470   | ,242 | 3,770   | 1  | ,052 | 1,601  | ,996                | 2,574 |
| Constant   | -2,273 | ,184 | 152,586 | 1  | ,000 | ,103   |                     |       |

a. Variable(s) entered on step 1: sv3, VASTY2.

```
LOGISTIC REGRESSION VARIABLES hand01
/METHOD=ENTER sv5 VASTY2
/CONTRAST (sv5)=Indicator(1)
/CONTRAST (VASTY2)=Indicator(1)
/PRINT=CI(95)
/CRITERIA=PIN(0.05) POUT(0.10) ITERATE(20) CUT(0.5).
```

**Block 1: Method = Enter**

**Omnibus Tests of Model Coefficients**

|        |       | Chi-square | df | Sig. |
|--------|-------|------------|----|------|
| Step 1 | Step  | 558,845    | 39 | ,000 |
|        | Block | 558,845    | 39 | ,000 |
|        | Model | 558,845    | 39 | ,000 |

**Model Summary**

| Step | -2 Log likelihood    | Cox & Snell R Square | Nagelkerke R Square |
|------|----------------------|----------------------|---------------------|
| 1    | 8064,74 <sup>a</sup> | ,044                 | ,088                |

a. Estimation terminated at iteration number 6 because parameter estimates changed by less than ,001.

Classification Table<sup>a</sup>

| Observed           |                              | Predicted                    |                     |                    |       |
|--------------------|------------------------------|------------------------------|---------------------|--------------------|-------|
|                    |                              | hand01 händelse nej eller ja |                     | Percentage Correct |       |
|                    |                              | 0 ingen händelse             | 1 minst en händelse |                    |       |
| Step 1             | hand01 händelse nej eller ja | 0 ingen händelse             | 11108               | 0                  | 100,0 |
|                    |                              | 1 minst en händelse          | 1367                | 0                  | ,0    |
| Overall Percentage |                              |                              |                     |                    | 89,0  |

a. The cut value is ,500

Variables in the Equation

|                         | B      | S.E. | Wald    | df | Sig. | Exp(B) | 95% C.I. for EXP(B) |       |
|-------------------------|--------|------|---------|----|------|--------|---------------------|-------|
|                         |        |      |         |    |      |        | Lower               | Upper |
| Step 1 <sup>a</sup> sv5 |        |      | 20,334  | 4  | ,000 |        |                     |       |
| sv5(1)                  | -,231  | ,108 | 4,557   | 1  | ,033 | ,794   | ,642                | ,981  |
| sv5(2)                  | -,057  | ,108 | ,279    | 1  | ,597 | ,945   | ,765                | 1,167 |
| sv5(3)                  | -,053  | ,100 | ,283    | 1  | ,595 | ,948   | ,780                | 1,153 |
| sv5(4)                  | ,269   | ,107 | 6,278   | 1  | ,012 | 1,309  | 1,060               | 1,616 |
| VASTY2                  |        |      | 432,108 | 35 | ,000 |        |                     |       |
| VASTY2(1)               | ,291   | ,241 | 1,465   | 1  | ,226 | 1,338  | ,835                | 2,145 |
| VASTY2(2)               | 1,054  | ,221 | 22,667  | 1  | ,000 | 2,869  | 1,859               | 4,427 |
| VASTY2(3)               | -,662  | ,302 | 4,808   | 1  | ,028 | ,516   | ,286                | ,932  |
| VASTY2(4)               | ,316   | ,242 | 1,709   | 1  | ,191 | 1,372  | ,854                | 2,204 |
| VASTY2(5)               | -,250  | ,283 | ,781    | 1  | ,377 | ,779   | ,447                | 1,356 |
| VASTY2(6)               | -1,199 | ,334 | 12,908  | 1  | ,000 | ,301   | ,157                | ,580  |
| VASTY2(7)               | 1,262  | ,217 | 33,934  | 1  | ,000 | 3,534  | 2,311               | 5,404 |
| VASTY2(8)               | ,376   | ,241 | 2,443   | 1  | ,118 | 1,456  | ,909                | 2,333 |
| VASTY2(9)               | ,292   | ,245 | 1,414   | 1  | ,234 | 1,339  | ,828                | 2,166 |
| VASTY2(10)              | ,871   | ,226 | 14,883  | 1  | ,000 | 2,389  | 1,535               | 3,720 |
| VASTY2(11)              | ,907   | ,223 | 16,623  | 1  | ,000 | 2,477  | 1,602               | 3,832 |
| VASTY2(12)              | ,008   | ,251 | ,001    | 1  | ,976 | 1,008  | ,616                | 1,647 |
| VASTY2(13)              | ,686   | ,230 | 8,900   | 1  | ,003 | 1,986  | 1,265               | 3,118 |
| VASTY2(14)              | -,336  | ,269 | 1,557   | 1  | ,212 | ,715   | ,422                | 1,211 |
| VASTY2(15)              | ,119   | ,246 | ,235    | 1  | ,628 | 1,127  | ,696                | 1,825 |
| VASTY2(16)              | ,317   | ,289 | 1,200   | 1  | ,273 | 1,373  | ,779                | 2,419 |
| VASTY2(17)              | -1,165 | ,356 | 10,728  | 1  | ,001 | ,312   | ,155                | ,626  |
| VASTY2(18)              | -,683  | ,328 | 4,334   | 1  | ,037 | ,505   | ,265                | ,961  |
| VASTY2(19)              | -1,214 | ,390 | 9,669   | 1  | ,002 | ,297   | ,138                | ,638  |
| VASTY2(20)              | ,022   | ,263 | ,007    | 1  | ,933 | 1,022  | ,611                | 1,712 |
| VASTY2(21)              | -,098  | ,263 | ,138    | 1  | ,710 | ,907   | ,542                | 1,518 |
| VASTY2(22)              | ,053   | ,252 | ,045    | 1  | ,832 | 1,055  | ,644                | 1,727 |
| VASTY2(23)              | ,729   | ,228 | 10,258  | 1  | ,001 | 2,073  | 1,327               | 3,239 |

**Variables in the Equation**

|            | B      | S.E. | Wald    | df | Sig. | Exp(B) | 95% C.I. for EXP(B) |       |
|------------|--------|------|---------|----|------|--------|---------------------|-------|
|            |        |      |         |    |      |        | Lower               | Upper |
| VASTY2(24) | ,589   | ,229 | 6,595   | 1  | ,010 | 1,803  | 1,150               | 2,826 |
| VASTY2(25) | ,156   | ,265 | ,346    | 1  | ,556 | 1,169  | ,695                | 1,964 |
| VASTY2(26) | -,806  | ,336 | 5,735   | 1  | ,017 | ,447   | ,231                | ,864  |
| VASTY2(27) | -1,343 | ,358 | 14,078  | 1  | ,000 | ,261   | ,129                | ,527  |
| VASTY2(28) | -1,089 | ,378 | 8,296   | 1  | ,004 | ,337   | ,160                | ,706  |
| VASTY2(29) | -1,185 | ,329 | 12,977  | 1  | ,000 | ,306   | ,160                | ,583  |
| VASTY2(30) | ,113   | ,253 | ,200    | 1  | ,655 | 1,119  | ,682                | 1,837 |
| VASTY2(31) | ,693   | ,240 | 8,319   | 1  | ,004 | 1,999  | 1,249               | 3,200 |
| VASTY2(32) | ,130   | ,269 | ,235    | 1  | ,628 | 1,139  | ,672                | 1,931 |
| VASTY2(33) | ,161   | ,268 | ,360    | 1  | ,548 | 1,175  | ,694                | 1,987 |
| VASTY2(34) | -1,523 | ,400 | 14,471  | 1  | ,000 | ,218   | ,099                | ,478  |
| VASTY2(35) | ,477   | ,243 | 3,866   | 1  | ,049 | 1,611  | 1,001               | 2,593 |
| Constant   | -2,232 | ,190 | 138,002 | 1  | ,000 | ,107   |                     |       |

a. Variable(s) entered on step 1: sv5, VASTY2.

```
LOGISTIC REGRESSION VARIABLES hand01
/METHOD=ENTER sv7 VASTY2
/CONTRAST (sv7)=Indicator(1)
/CONTRAST (VASTY2)=Indicator(1)
/PRINT=CI(95)
/CRITERIA=PIN(0.05) POUT(0.10) ITERATE(20) CUT(0.5).
```

**Block 1: Method = Enter**

**Omnibus Tests of Model Coefficients**

|        |       | Chi-square | df | Sig. |
|--------|-------|------------|----|------|
| Step 1 | Step  | 564,160    | 41 | ,000 |
|        | Block | 564,160    | 41 | ,000 |
|        | Model | 564,160    | 41 | ,000 |

**Model Summary**

| Step | -2 Log likelihood    | Cox & Snell R Square | Nagelkerke R Square |
|------|----------------------|----------------------|---------------------|
| 1    | 8059,42 <sup>a</sup> | ,044                 | ,089                |

a. Estimation terminated at iteration number 6 because parameter estimates changed by less than ,001.

**Classification Table<sup>a</sup>**

| Observed           |                              | Predicted                    |                     |                    |       |
|--------------------|------------------------------|------------------------------|---------------------|--------------------|-------|
|                    |                              | hand01 händelse nej eller ja |                     | Percentage Correct |       |
|                    |                              | 0 ingen händelse             | 1 minst en händelse |                    |       |
| Step 1             | hand01 händelse nej eller ja | 0 ingen händelse             | 11108               | 0                  | 100,0 |
|                    |                              | 1 minst en händelse          | 1367                | 0                  | ,0    |
| Overall Percentage |                              |                              |                     |                    | 89,0  |

a. The cut value is ,500

**Variables in the Equation**

|                     | B      | S.E. | Wald    | df | Sig. | Exp(B) | 95% C.I. for EXP(B) |       |
|---------------------|--------|------|---------|----|------|--------|---------------------|-------|
|                     |        |      |         |    |      |        | Lower               | Upper |
| Step 1 <sup>a</sup> |        |      |         |    |      |        |                     |       |
| sv7                 |        |      | 25,503  | 6  | ,000 |        |                     |       |
| sv7(1)              | -,325  | ,124 | 6,831   | 1  | ,009 | ,723   | ,566                | ,922  |
| sv7(2)              | -,076  | ,126 | ,361    | 1  | ,548 | ,927   | ,723                | 1,188 |
| sv7(3)              | -,121  | ,125 | ,927    | 1  | ,336 | ,886   | ,694                | 1,133 |
| sv7(4)              | -,056  | ,119 | ,224    | 1  | ,636 | ,945   | ,749                | 1,193 |
| sv7(5)              | ,047   | ,112 | ,176    | 1  | ,674 | 1,048  | ,841                | 1,306 |
| sv7(6)              | ,344   | ,125 | 7,528   | 1  | ,006 | 1,410  | 1,103               | 1,803 |
| VASTY2              |        |      | 432,430 | 35 | ,000 |        |                     |       |
| VASTY2(1)           | ,293   | ,241 | 1,484   | 1  | ,223 | 1,341  | ,836                | 2,150 |
| VASTY2(2)           | 1,034  | ,222 | 21,724  | 1  | ,000 | 2,812  | 1,820               | 4,343 |
| VASTY2(3)           | -,668  | ,302 | 4,901   | 1  | ,027 | ,513   | ,284                | ,926  |
| VASTY2(4)           | ,304   | ,242 | 1,574   | 1  | ,210 | 1,355  | ,843                | 2,177 |
| VASTY2(5)           | -,237  | ,283 | ,699    | 1  | ,403 | ,789   | ,453                | 1,374 |
| VASTY2(6)           | -1,270 | ,336 | 14,239  | 1  | ,000 | ,281   | ,145                | ,543  |
| VASTY2(7)           | 1,259  | ,217 | 33,714  | 1  | ,000 | 3,520  | 2,302               | 5,383 |
| VASTY2(8)           | ,377   | ,241 | 2,454   | 1  | ,117 | 1,458  | ,910                | 2,337 |
| VASTY2(9)           | ,283   | ,246 | 1,330   | 1  | ,249 | 1,327  | ,820                | 2,148 |
| VASTY2(10)          | ,847   | ,226 | 13,989  | 1  | ,000 | 2,333  | 1,497               | 3,636 |
| VASTY2(11)          | ,916   | ,223 | 16,906  | 1  | ,000 | 2,499  | 1,615               | 3,868 |

Variables in the Equation

|            | B      | S.E. | Wald    | df | Sig. | Exp(B) | 95% C.I. for EXP(B) |       |
|------------|--------|------|---------|----|------|--------|---------------------|-------|
|            |        |      |         |    |      |        | Lower               | Upper |
| VASTY2(12) | ,001   | ,251 | ,000    | 1  | ,997 | 1,001  | ,613                | 1,636 |
| VASTY2(13) | ,657   | ,231 | 8,102   | 1  | ,004 | 1,929  | 1,227               | 3,032 |
| VASTY2(14) | -,347  | ,269 | 1,662   | 1  | ,197 | ,707   | ,417                | 1,198 |
| VASTY2(15) | ,094   | ,247 | ,146    | 1  | ,702 | 1,099  | ,677                | 1,783 |
| VASTY2(16) | ,287   | ,290 | ,979    | 1  | ,322 | 1,332  | ,755                | 2,352 |
| VASTY2(17) | -1,169 | ,356 | 10,782  | 1  | ,001 | ,311   | ,155                | ,624  |
| VASTY2(18) | -,619  | ,331 | 3,504   | 1  | ,061 | ,539   | ,282                | 1,030 |
| VASTY2(19) | -1,140 | ,393 | 8,403   | 1  | ,004 | ,320   | ,148                | ,691  |
| VASTY2(20) | -,004  | ,264 | ,000    | 1  | ,986 | ,996   | ,594                | 1,669 |
| VASTY2(21) | -,102  | ,263 | ,151    | 1  | ,698 | ,903   | ,540                | 1,511 |
| VASTY2(22) | ,057   | ,252 | ,052    | 1  | ,820 | 1,059  | ,647                | 1,734 |
| VASTY2(23) | ,734   | ,228 | 10,398  | 1  | ,001 | 2,084  | 1,334               | 3,256 |
| VASTY2(24) | ,584   | ,230 | 6,482   | 1  | ,011 | 1,794  | 1,144               | 2,813 |
| VASTY2(25) | ,164   | ,265 | ,381    | 1  | ,537 | 1,178  | ,701                | 1,980 |
| VASTY2(26) | -,809  | ,337 | 5,781   | 1  | ,016 | ,445   | ,230                | ,861  |
| VASTY2(27) | -1,377 | ,359 | 14,731  | 1  | ,000 | ,252   | ,125                | ,510  |
| VASTY2(28) | -1,174 | ,382 | 9,468   | 1  | ,002 | ,309   | ,146                | ,653  |
| VASTY2(29) | -1,274 | ,333 | 14,612  | 1  | ,000 | ,280   | ,146                | ,538  |
| VASTY2(30) | ,113   | ,253 | ,200    | 1  | ,655 | 1,119  | ,682                | 1,837 |
| VASTY2(31) | ,729   | ,241 | 9,166   | 1  | ,002 | 2,073  | 1,293               | 3,323 |
| VASTY2(32) | ,195   | ,272 | ,514    | 1  | ,473 | 1,215  | ,713                | 2,072 |
| VASTY2(33) | ,235   | ,272 | ,743    | 1  | ,389 | 1,265  | ,742                | 2,157 |
| VASTY2(34) | -1,526 | ,400 | 14,519  | 1  | ,000 | ,217   | ,099                | ,477  |
| VASTY2(35) | ,471   | ,243 | 3,759   | 1  | ,053 | 1,602  | ,995                | 2,578 |
| Constant   | -2,212 | ,194 | 129,865 | 1  | ,000 | ,109   |                     |       |

a. Variable(s) entered on step 1: sv7, VASTY2.

\*\*

```
LOGISTIC REGRESSION VARIABLES luonnel1
/METHOD=ENTER bv1 VASTY2
/CONTRAST (bv1)=Indicator(1)
/CONTRAST (VASTY2)=Indicator(1)
/PRINT=CI(95)
/CRITERIA=PIN(0.05) POUT(0.10) ITERATE(20) CUT(0.5).
```

**Block 1: Method = Enter**

**Omnibus Tests of Model Coefficients**

|        |       | Chi-square | df | Sig. |
|--------|-------|------------|----|------|
| Step 1 | Step  | 320,286    | 37 | ,000 |
|        | Block | 320,286    | 37 | ,000 |
|        | Model | 320,286    | 37 | ,000 |

**Model Summary**

| Step | -2 Log likelihood    | Cox & Snell R Square | Nagelkerke R Square |
|------|----------------------|----------------------|---------------------|
| 1    | 5876,59 <sup>a</sup> | ,025                 | ,065                |

a. Estimation terminated at iteration number 7 because parameter estimates changed by less than ,001.

**Classification Table<sup>a</sup>**

|                    |                                                |                                                              | Predicted                                    |
|--------------------|------------------------------------------------|--------------------------------------------------------------|----------------------------------------------|
|                    |                                                |                                                              | luonnelt1<br>luonne<br>highest = ...         |
| Observed           |                                                |                                                              | 0 ingen<br>händelse<br>eller läheltä<br>piti |
| Step 1             | luonnelt1 luonne highest = tapahtui potilaalle | 0 ingen händelse eller läheltä piti<br>1 tapahtui potilaalle | 11627<br>848                                 |
| Overall Percentage |                                                |                                                              |                                              |

**Classification Table<sup>a</sup>**

|                    |                                                |                                                              | Predicted                            |
|--------------------|------------------------------------------------|--------------------------------------------------------------|--------------------------------------|
|                    |                                                |                                                              | luonnelt1<br>luonne<br>highest = ... |
| Observed           |                                                |                                                              | 1 tapahtui<br>potilaalle             |
| Step 1             | luonnelt1 luonne highest = tapahtui potilaalle | 0 ingen händelse eller läheltä piti<br>1 tapahtui potilaalle | 0<br>0                               |
| Overall Percentage |                                                |                                                              |                                      |

Classification Table<sup>a</sup>

|                    |                                                |                                                              | Predicted          |
|--------------------|------------------------------------------------|--------------------------------------------------------------|--------------------|
| Observed           |                                                |                                                              | Percentage Correct |
| Step 1             | luonnelt1 luonne highest = tapahtui potilaalle | 0 ingen händelse eller läheltä piti<br>1 tapahtui potilaalle | 100,0<br>,0        |
| Overall Percentage |                                                |                                                              | 93,2               |

a. The cut value is ,500

Variables in the Equation

|                         | B      | S.E. | Wald    | df | Sig. | Exp(B) | 95% C.I. for EXP(B) |       |
|-------------------------|--------|------|---------|----|------|--------|---------------------|-------|
|                         |        |      |         |    |      |        | Lower               | Upper |
| Step 1 <sup>a</sup> bv1 |        |      | 12,580  | 2  | ,002 |        |                     |       |
|                         | -,279  | ,102 | 7,512   | 1  | ,006 | ,757   | ,620                | ,924  |
|                         | ,105   | ,085 | 1,521   | 1  | ,217 | 1,111  | ,940                | 1,312 |
| VASTY2                  |        |      | 236,395 | 35 | ,000 |        |                     |       |
| VASTY2(1)               | ,094   | ,299 | ,099    | 1  | ,752 | 1,099  | ,611                | 1,975 |
| VASTY2(2)               | ,538   | ,274 | 3,849   | 1  | ,050 | 1,713  | 1,000               | 2,934 |
| VASTY2(3)               | -1,507 | ,466 | 10,436  | 1  | ,001 | ,222   | ,089                | ,553  |
| VASTY2(4)               | ,124   | ,294 | ,178    | 1  | ,673 | 1,132  | ,637                | 2,013 |
| VASTY2(5)               | -,192  | ,325 | ,350    | 1  | ,554 | ,825   | ,436                | 1,560 |
| VASTY2(6)               | -1,298 | ,439 | 8,730   | 1  | ,003 | ,273   | ,115                | ,646  |
| VASTY2(7)               | ,529   | ,276 | 3,672   | 1  | ,055 | 1,698  | ,988                | 2,917 |
| VASTY2(8)               | -,265  | ,320 | ,686    | 1  | ,407 | ,767   | ,410                | 1,436 |
| VASTY2(9)               | ,262   | ,291 | ,810    | 1  | ,368 | 1,299  | ,735                | 2,299 |
| VASTY2(10)              | 1,014  | ,258 | 15,416  | 1  | ,000 | 2,756  | 1,662               | 4,572 |
| VASTY2(11)              | ,615   | ,272 | 5,094   | 1  | ,024 | 1,849  | 1,084               | 3,153 |
| VASTY2(12)              | ,115   | ,295 | ,153    | 1  | ,695 | 1,122  | ,630                | 1,999 |
| VASTY2(13)              | ,966   | ,260 | 13,812  | 1  | ,000 | 2,628  | 1,579               | 4,374 |
| VASTY2(14)              | -,257  | ,320 | ,646    | 1  | ,422 | ,773   | ,413                | 1,448 |
| VASTY2(15)              | ,244   | ,288 | ,719    | 1  | ,396 | 1,277  | ,726                | 2,246 |
| VASTY2(16)              | ,515   | ,330 | 2,437   | 1  | ,119 | 1,674  | ,877                | 3,196 |
| VASTY2(17)              | -1,073 | ,418 | 6,592   | 1  | ,010 | ,342   | ,151                | ,776  |
| VASTY2(18)              | -,668  | ,365 | 3,357   | 1  | ,067 | ,513   | ,251                | 1,048 |
| VASTY2(19)              | -1,610 | ,551 | 8,547   | 1  | ,003 | ,200   | ,068                | ,588  |
| VASTY2(20)              | ,066   | ,314 | ,045    | 1  | ,832 | 1,069  | ,578                | 1,977 |
| VASTY2(21)              | -,127  | ,312 | ,167    | 1  | ,683 | ,880   | ,478                | 1,622 |
| VASTY2(22)              | ,328   | ,291 | 1,275   | 1  | ,259 | 1,388  | ,786                | 2,454 |
| VASTY2(23)              | ,308   | ,288 | 1,142   | 1  | ,285 | 1,360  | ,774                | 2,392 |

**Variables in the Equation**

|            | B      | S.E. | Wald    | df | Sig. | Exp(B) | 95% C.I. for EXP(B) |       |
|------------|--------|------|---------|----|------|--------|---------------------|-------|
|            |        |      |         |    |      |        | Lower               | Upper |
| VASTY2(24) | ,264   | ,286 | ,857    | 1  | ,355 | 1,303  | ,744                | 2,281 |
| VASTY2(25) | ,346   | ,300 | 1,323   | 1  | ,250 | 1,413  | ,784                | 2,546 |
| VASTY2(26) | -,909  | ,419 | 4,711   | 1  | ,030 | ,403   | ,177                | ,916  |
| VASTY2(27) | -1,454 | ,466 | 9,752   | 1  | ,002 | ,234   | ,094                | ,582  |
| VASTY2(28) | -,988  | ,467 | 4,473   | 1  | ,034 | ,372   | ,149                | ,930  |
| VASTY2(29) | -1,026 | ,401 | 6,552   | 1  | ,010 | ,359   | ,163                | ,786  |
| VASTY2(30) | -,190  | ,315 | ,364    | 1  | ,546 | ,827   | ,445                | 1,534 |
| VASTY2(31) | ,520   | ,278 | 3,496   | 1  | ,062 | 1,681  | ,975                | 2,899 |
| VASTY2(32) | -,035  | ,313 | ,012    | 1  | ,912 | ,966   | ,523                | 1,783 |
| VASTY2(33) | ,035   | ,305 | ,013    | 1  | ,909 | 1,035  | ,569                | 1,884 |
| VASTY2(34) | -1,255 | ,438 | 8,197   | 1  | ,004 | ,285   | ,121                | ,673  |
| VASTY2(35) | ,668   | ,278 | 5,783   | 1  | ,016 | 1,951  | 1,132               | 3,363 |
| Constant   | -2,639 | ,218 | 146,911 | 1  | ,000 | ,071   |                     |       |

a. Variable(s) entered on step 1: bv1, VASTY2.

```
LOGISTIC REGRESSION VARIABLES luonnelt1
/METHOD=ENTER bv2 VASTY2
/CONTRAST (bv2)=Indicator(1)
/CONTRAST (VASTY2)=Indicator(1)
/PRINT=CI(95)
/CRITERIA=PIN(0.05) POUT(0.10) ITERATE(20) CUT(0.5).
```

**Block 1: Method = Enter**

**Omnibus Tests of Model Coefficients**

|        |       | Chi-square | df | Sig. |
|--------|-------|------------|----|------|
| Step 1 | Step  | 316,220    | 37 | ,000 |
|        | Block | 316,220    | 37 | ,000 |
|        | Model | 316,220    | 37 | ,000 |



**Model Summary**

| Step | -2 Log likelihood    | Cox & Snell R Square | Nagelkerke R Square |
|------|----------------------|----------------------|---------------------|
| 1    | 5880,65 <sup>a</sup> | ,025                 | ,064                |

a. Estimation terminated at iteration number 7 because parameter estimates changed by less than ,001.

**Classification Table<sup>a</sup>**

|                    |                                                | Predicted                                                    |              |
|--------------------|------------------------------------------------|--------------------------------------------------------------|--------------|
|                    |                                                | luonnelt1 luonne highest = ...                               |              |
| Observed           |                                                | 0 ingen händelse eller läheltä piti                          |              |
| Step 1             | luonnelt1 luonne highest = tapahtui potilaalle | 0 ingen händelse eller läheltä piti<br>1 tapahtui potilaalle | 11627<br>848 |
| Overall Percentage |                                                |                                                              |              |

**Classification Table<sup>a</sup>**

|                    |                                                | Predicted                                                    |        |
|--------------------|------------------------------------------------|--------------------------------------------------------------|--------|
|                    |                                                | luonnelt1 luonne highest = ...                               |        |
| Observed           |                                                | 1 tapahtui potilaalle                                        |        |
| Step 1             | luonnelt1 luonne highest = tapahtui potilaalle | 0 ingen händelse eller läheltä piti<br>1 tapahtui potilaalle | 0<br>0 |
| Overall Percentage |                                                |                                                              |        |

Classification Table<sup>a</sup>

|                    |                                                |                                                              | Predicted          |
|--------------------|------------------------------------------------|--------------------------------------------------------------|--------------------|
|                    |                                                |                                                              |                    |
| Observed           |                                                |                                                              | Percentage Correct |
| Step 1             | luonnelt1 luonne highest = tapahtui potilaalle | 0 ingen händelse eller läheltä piti<br>1 tapahtui potilaalle | 100,0<br>,0        |
| Overall Percentage |                                                |                                                              | 93,2               |

a. The cut value is ,500

Variables in the Equation

|                     |            | B      | S.E. | Wald    | df | Sig. | Exp(B) | 95% C.I. for EXP(B) |       |
|---------------------|------------|--------|------|---------|----|------|--------|---------------------|-------|
|                     |            |        |      |         |    |      |        | Lower               | Upper |
| Step 1 <sup>a</sup> | bv2        |        |      | 8,836   | 2  | ,012 |        |                     |       |
|                     | bv2(1)     | -,178  | ,103 | 3,024   | 1  | ,082 | ,837   | ,684                | 1,023 |
|                     | bv2(2)     | ,092   | ,094 | ,963    | 1  | ,326 | 1,097  | ,912                | 1,318 |
|                     | VASTY2     |        |      | 238,156 | 35 | ,000 |        |                     |       |
|                     | VASTY2(1)  | ,083   | ,299 | ,077    | 1  | ,781 | 1,087  | ,605                | 1,953 |
|                     | VASTY2(2)  | ,540   | ,274 | 3,877   | 1  | ,049 | 1,717  | 1,002               | 2,940 |
|                     | VASTY2(3)  | -1,490 | ,466 | 10,218  | 1  | ,001 | ,225   | ,090                | ,562  |
|                     | VASTY2(4)  | ,133   | ,293 | ,205    | 1  | ,651 | 1,142  | ,643                | 2,029 |
|                     | VASTY2(5)  | -,194  | ,325 | ,356    | 1  | ,551 | ,824   | ,436                | 1,557 |
|                     | VASTY2(6)  | -1,289 | ,439 | 8,622   | 1  | ,003 | ,276   | ,117                | ,651  |
|                     | VASTY2(7)  | ,539   | ,275 | 3,839   | 1  | ,050 | 1,714  | 1,000               | 2,940 |
|                     | VASTY2(8)  | -,263  | ,320 | ,677    | 1  | ,411 | ,768   | ,410                | 1,439 |
|                     | VASTY2(9)  | ,261   | ,291 | ,805    | 1  | ,370 | 1,298  | ,734                | 2,297 |
|                     | VASTY2(10) | 1,022  | ,258 | 15,652  | 1  | ,000 | 2,778  | 1,675               | 4,608 |
|                     | VASTY2(11) | ,614   | ,272 | 5,092   | 1  | ,024 | 1,848  | 1,084               | 3,149 |
|                     | VASTY2(12) | ,120   | ,295 | ,166    | 1  | ,684 | 1,128  | ,633                | 2,008 |
|                     | VASTY2(13) | ,971   | ,260 | 13,951  | 1  | ,000 | 2,642  | 1,587               | 4,398 |
|                     | VASTY2(14) | -,258  | ,320 | ,650    | 1  | ,420 | ,773   | ,413                | 1,447 |
|                     | VASTY2(15) | ,240   | ,288 | ,696    | 1  | ,404 | 1,272  | ,723                | 2,237 |
|                     | VASTY2(16) | ,509   | ,330 | 2,390   | 1  | ,122 | 1,664  | ,872                | 3,175 |
|                     | VASTY2(17) | -1,076 | ,418 | 6,639   | 1  | ,010 | ,341   | ,150                | ,773  |
|                     | VASTY2(18) | -,677  | ,364 | 3,445   | 1  | ,063 | ,508   | ,249                | 1,039 |
|                     | VASTY2(19) | -1,680 | ,549 | 9,351   | 1  | ,002 | ,186   | ,064                | ,547  |
|                     | VASTY2(20) | ,071   | ,314 | ,052    | 1  | ,820 | 1,074  | ,581                | 1,985 |
|                     | VASTY2(21) | -,126  | ,312 | ,164    | 1  | ,685 | ,881   | ,478                | 1,624 |
|                     | VASTY2(22) | ,322   | ,291 | 1,227   | 1  | ,268 | 1,380  | ,780                | 2,440 |
|                     | VASTY2(23) | ,298   | ,288 | 1,069   | 1  | ,301 | 1,347  | ,766                | 2,367 |

**Variables in the Equation**

|            | B      | S.E. | Wald    | df | Sig. | Exp(B) | 95% C.I. for EXP(B) |       |
|------------|--------|------|---------|----|------|--------|---------------------|-------|
|            |        |      |         |    |      |        | Lower               | Upper |
| VASTY2(24) | ,280   | ,286 | ,958    | 1  | ,328 | 1,322  | ,756                | 2,315 |
| VASTY2(25) | ,347   | ,300 | 1,337   | 1  | ,248 | 1,415  | ,785                | 2,550 |
| VASTY2(26) | -,913  | ,419 | 4,751   | 1  | ,029 | ,401   | ,177                | ,912  |
| VASTY2(27) | -1,455 | ,465 | 9,774   | 1  | ,002 | ,233   | ,094                | ,581  |
| VASTY2(28) | -,986  | ,467 | 4,448   | 1  | ,035 | ,373   | ,149                | ,933  |
| VASTY2(29) | -1,016 | ,401 | 6,424   | 1  | ,011 | ,362   | ,165                | ,794  |
| VASTY2(30) | -,182  | ,315 | ,333    | 1  | ,564 | ,834   | ,449                | 1,547 |
| VASTY2(31) | ,508   | ,277 | 3,352   | 1  | ,067 | 1,662  | ,965                | 2,862 |
| VASTY2(32) | -,056  | ,312 | ,033    | 1  | ,857 | ,945   | ,513                | 1,742 |
| VASTY2(33) | ,020   | ,305 | ,004    | 1  | ,948 | 1,020  | ,561                | 1,855 |
| VASTY2(34) | -1,251 | ,438 | 8,136   | 1  | ,004 | ,286   | ,121                | ,676  |
| VASTY2(35) | ,677   | ,277 | 5,975   | 1  | ,015 | 1,968  | 1,144               | 3,387 |
| Constant   | -2,650 | ,223 | 140,917 | 1  | ,000 | ,071   |                     |       |

a. Variable(s) entered on step 1: bv2, VASTY2.

```
LOGISTIC REGRESSION VARIABLES luonnelt1
/METHOD=ENTER bv3 VASTY2
/CONTRAST (bv3)=Indicator(1)
/CONTRAST (VASTY2)=Indicator(1)
/PRINT=CI(95)
/CRITERIA=PIN(0.05) POUT(0.10) ITERATE(20) CUT(0.5).
```

**Block 1: Method = Enter**

**Omnibus Tests of Model Coefficients**

|        |       | Chi-square | df | Sig. |
|--------|-------|------------|----|------|
| Step 1 | Step  | 316,969    | 37 | ,000 |
|        | Block | 316,969    | 37 | ,000 |
|        | Model | 316,969    | 37 | ,000 |

**Model Summary**

| Step | -2 Log likelihood    | Cox & Snell R Square | Nagelkerke R Square |
|------|----------------------|----------------------|---------------------|
| 1    | 5879,90 <sup>a</sup> | ,025                 | ,064                |

a. Estimation terminated at iteration number 7 because parameter estimates changed by less than ,001.

**Classification Table<sup>a</sup>**

|                    |                                                | Predicted                                                    |              |
|--------------------|------------------------------------------------|--------------------------------------------------------------|--------------|
|                    |                                                | luonnelt1 luonne highest = ...                               |              |
| Observed           |                                                | 0 ingen händelse eller läheltä piti                          |              |
| Step 1             | luonnelt1 luonne highest = tapahtui potilaalle | 0 ingen händelse eller läheltä piti<br>1 tapahtui potilaalle | 11627<br>848 |
| Overall Percentage |                                                |                                                              |              |

**Classification Table<sup>a</sup>**

|                    |                                                | Predicted                                                    |        |
|--------------------|------------------------------------------------|--------------------------------------------------------------|--------|
|                    |                                                | luonnelt1 luonne highest = ...                               |        |
| Observed           |                                                | 1 tapahtui potilaalle                                        |        |
| Step 1             | luonnelt1 luonne highest = tapahtui potilaalle | 0 ingen händelse eller läheltä piti<br>1 tapahtui potilaalle | 0<br>0 |
| Overall Percentage |                                                |                                                              |        |

Classification Table<sup>a</sup>

|                    |                                                |                                                              | Predicted          |
|--------------------|------------------------------------------------|--------------------------------------------------------------|--------------------|
| Observed           |                                                |                                                              | Percentage Correct |
| Step 1             | luonnelt1 luonne highest = tapahtui potilaalle | 0 ingen händelse eller läheltä piti<br>1 tapahtui potilaalle | 100,0<br>,0        |
| Overall Percentage |                                                |                                                              | 93,2               |

a. The cut value is ,500

Variables in the Equation

|                         | B      | S.E. | Wald    | df | Sig. | Exp(B) | 95% C.I. for EXP(B) |       |
|-------------------------|--------|------|---------|----|------|--------|---------------------|-------|
|                         |        |      |         |    |      |        | Lower               | Upper |
| Step 1 <sup>a</sup> bv3 |        |      | 9,244   | 2  | ,010 |        |                     |       |
|                         | -,346  | ,140 | 6,122   | 1  | ,013 | ,708   | ,538                | ,931  |
|                         | ,147   | ,103 | 2,035   | 1  | ,154 | 1,158  | ,947                | 1,417 |
| VASTY2                  |        |      | 240,353 | 35 | ,000 |        |                     |       |
| VASTY2(1)               | ,122   | ,299 | ,165    | 1  | ,684 | 1,129  | ,628                | 2,030 |
| VASTY2(2)               | ,564   | ,274 | 4,233   | 1  | ,040 | 1,758  | 1,027               | 3,008 |
| VASTY2(3)               | -1,468 | ,466 | 9,921   | 1  | ,002 | ,230   | ,092                | ,574  |
| VASTY2(4)               | ,150   | ,293 | ,262    | 1  | ,609 | 1,162  | ,654                | 2,066 |
| VASTY2(5)               | -,170  | ,325 | ,275    | 1  | ,600 | ,844   | ,446                | 1,594 |
| VASTY2(6)               | -1,276 | ,439 | 8,434   | 1  | ,004 | ,279   | ,118                | ,660  |
| VASTY2(7)               | ,545   | ,278 | 3,842   | 1  | ,050 | 1,725  | 1,000               | 2,975 |
| VASTY2(8)               | -,230  | ,320 | ,518    | 1  | ,472 | ,795   | ,425                | 1,486 |
| VASTY2(9)               | ,294   | ,291 | 1,026   | 1  | ,311 | 1,342  | ,759                | 2,372 |
| VASTY2(10)              | 1,047  | ,258 | 16,512  | 1  | ,000 | 2,850  | 1,720               | 4,724 |
| VASTY2(11)              | ,632   | ,272 | 5,388   | 1  | ,020 | 1,881  | 1,103               | 3,206 |
| VASTY2(12)              | ,150   | ,294 | ,260    | 1  | ,610 | 1,162  | ,653                | 2,067 |
| VASTY2(13)              | 1,023  | ,258 | 15,658  | 1  | ,000 | 2,781  | 1,676               | 4,615 |
| VASTY2(14)              | -,228  | ,320 | ,509    | 1  | ,475 | ,796   | ,425                | 1,490 |
| VASTY2(15)              | ,270   | ,288 | ,882    | 1  | ,348 | 1,310  | ,745                | 2,303 |
| VASTY2(16)              | ,514   | ,331 | 2,418   | 1  | ,120 | 1,673  | ,875                | 3,200 |
| VASTY2(17)              | -1,086 | ,418 | 6,766   | 1  | ,009 | ,337   | ,149                | ,765  |
| VASTY2(18)              | -,669  | ,365 | 3,366   | 1  | ,067 | ,512   | ,251                | 1,047 |
| VASTY2(19)              | -1,599 | ,552 | 8,382   | 1  | ,004 | ,202   | ,068                | ,596  |
| VASTY2(20)              | ,087   | ,314 | ,077    | 1  | ,781 | 1,091  | ,590                | 2,020 |
| VASTY2(21)              | -,111  | ,312 | ,127    | 1  | ,721 | ,895   | ,486                | 1,648 |
| VASTY2(22)              | ,287   | ,290 | ,981    | 1  | ,322 | 1,333  | ,755                | 2,353 |
| VASTY2(23)              | ,308   | ,288 | 1,145   | 1  | ,285 | 1,361  | ,774                | 2,392 |

**Variables in the Equation**

|            | B      | S.E. | Wald    | df | Sig. | Exp(B) | 95% C.I. for EXP(B) |       |
|------------|--------|------|---------|----|------|--------|---------------------|-------|
|            |        |      |         |    |      |        | Lower               | Upper |
| VASTY2(24) | ,293   | ,286 | 1,052   | 1  | ,305 | 1,340  | ,766                | 2,346 |
| VASTY2(25) | ,362   | ,301 | 1,450   | 1  | ,229 | 1,436  | ,797                | 2,589 |
| VASTY2(26) | -,881  | ,419 | 4,428   | 1  | ,035 | ,414   | ,182                | ,941  |
| VASTY2(27) | -1,419 | ,465 | 9,305   | 1  | ,002 | ,242   | ,097                | ,602  |
| VASTY2(28) | -,936  | ,467 | 4,025   | 1  | ,045 | ,392   | ,157                | ,979  |
| VASTY2(29) | -1,011 | ,401 | 6,376   | 1  | ,012 | ,364   | ,166                | ,797  |
| VASTY2(30) | -,184  | ,315 | ,341    | 1  | ,559 | ,832   | ,448                | 1,543 |
| VASTY2(31) | ,543   | ,279 | 3,785   | 1  | ,052 | 1,721  | ,996                | 2,973 |
| VASTY2(32) | -,014  | ,314 | ,002    | 1  | ,965 | ,986   | ,533                | 1,825 |
| VASTY2(33) | ,062   | ,306 | ,041    | 1  | ,839 | 1,064  | ,584                | 1,939 |
| VASTY2(34) | -1,244 | ,438 | 8,054   | 1  | ,005 | ,288   | ,122                | ,681  |
| VASTY2(35) | ,687   | ,278 | 6,082   | 1  | ,014 | 1,987  | 1,151               | 3,430 |
| Constant   | -2,676 | ,216 | 154,004 | 1  | ,000 | ,069   |                     |       |

a. Variable(s) entered on step 1: bv3, VASTY2.

**Block 1: Method = Enter**

**Omnibus Tests of Model Coefficients**

|        |       | Chi-square | df | Sig. |
|--------|-------|------------|----|------|
| Step 1 | Step  | 311,201    | 37 | ,000 |
|        | Block | 311,201    | 37 | ,000 |
|        | Model | 311,201    | 37 | ,000 |

**Model Summary**

| Step | -2 Log likelihood    | Cox & Snell R Square | Nagelkerke R Square |
|------|----------------------|----------------------|---------------------|
| 1    | 5885,67 <sup>a</sup> | ,025                 | ,063                |

a. Estimation terminated at iteration number 7 because parameter estimates changed by less than ,001.

**Classification Table<sup>a</sup>**

|                    |                                                | Predicted                                                    |              |
|--------------------|------------------------------------------------|--------------------------------------------------------------|--------------|
|                    |                                                | luonnelt1<br>luonne<br>highest = ...                         |              |
| Observed           |                                                | 0 ingen<br>händelse<br>eller läheltä<br>piti                 |              |
| Step 1             | luonnelt1 luonne highest = tapahtui potilaalle | 0 ingen händelse eller läheltä piti<br>1 tapahtui potilaalle | 11627<br>848 |
| Overall Percentage |                                                |                                                              |              |

**Classification Table<sup>a</sup>**

|                    |                                                | Predicted                                                    |        |
|--------------------|------------------------------------------------|--------------------------------------------------------------|--------|
|                    |                                                | luonnelt1<br>luonne<br>highest = ...                         |        |
| Observed           |                                                | 1 tapahtui<br>potilaalle                                     |        |
| Step 1             | luonnelt1 luonne highest = tapahtui potilaalle | 0 ingen händelse eller läheltä piti<br>1 tapahtui potilaalle | 0<br>0 |
| Overall Percentage |                                                |                                                              |        |

**Classification Table<sup>a</sup>**

|                    |                                                | Predicted                                                    |             |
|--------------------|------------------------------------------------|--------------------------------------------------------------|-------------|
|                    |                                                | Percentage<br>Correct                                        |             |
| Observed           |                                                |                                                              |             |
| Step 1             | luonnelt1 luonne highest = tapahtui potilaalle | 0 ingen händelse eller läheltä piti<br>1 tapahtui potilaalle | 100,0<br>,0 |
| Overall Percentage |                                                |                                                              | 93,2        |

a. The cut value is ,500

**Variables in the Equation**

|                         | B      | S.E. | Wald    | df | Sig. | Exp(B) | 95% C.I. for EXP(B) |       |
|-------------------------|--------|------|---------|----|------|--------|---------------------|-------|
|                         |        |      |         |    |      |        | Lower               | Upper |
| Step 1 <sup>a</sup> sv3 |        |      | 3,981   | 2  | ,137 |        |                     |       |
| sv3(1)                  | -,060  | ,106 | ,325    | 1  | ,569 | ,941   | ,765                | 1,158 |
| sv3(2)                  | ,154   | ,103 | 2,238   | 1  | ,135 | 1,166  | ,953                | 1,427 |
| VASTY2                  |        |      | 231,303 | 35 | ,000 |        |                     |       |
| VASTY2(1)               | ,058   | ,300 | ,038    | 1  | ,846 | 1,060  | ,589                | 1,908 |
| VASTY2(2)               | ,488   | ,278 | 3,079   | 1  | ,079 | 1,628  | ,945                | 2,807 |
| VASTY2(3)               | -1,367 | ,465 | 8,655   | 1  | ,003 | ,255   | ,102                | ,634  |
| VASTY2(4)               | ,225   | ,292 | ,596    | 1  | ,440 | 1,253  | ,707                | 2,221 |
| VASTY2(5)               | -,101  | ,326 | ,095    | 1  | ,758 | ,904   | ,477                | 1,714 |
| VASTY2(6)               | -1,344 | ,442 | 9,235   | 1  | ,002 | ,261   | ,110                | ,621  |
| VASTY2(7)               | ,662   | ,272 | 5,921   | 1  | ,015 | 1,939  | 1,138               | 3,306 |
| VASTY2(8)               | -,160  | ,320 | ,250    | 1  | ,617 | ,852   | ,455                | 1,596 |
| VASTY2(9)               | ,321   | ,290 | 1,228   | 1  | ,268 | 1,379  | ,781                | 2,435 |
| VASTY2(10)              | ,968   | ,263 | 13,515  | 1  | ,000 | 2,632  | 1,571               | 4,410 |
| VASTY2(11)              | ,634   | ,272 | 5,443   | 1  | ,020 | 1,886  | 1,107               | 3,214 |
| VASTY2(12)              | ,087   | ,297 | ,086    | 1  | ,769 | 1,091  | ,609                | 1,954 |
| VASTY2(13)              | ,962   | ,264 | 13,267  | 1  | ,000 | 2,616  | 1,559               | 4,388 |
| VASTY2(14)              | -,266  | ,321 | ,687    | 1  | ,407 | ,766   | ,408                | 1,438 |
| VASTY2(15)              | ,196   | ,292 | ,452    | 1  | ,501 | 1,217  | ,687                | 2,154 |
| VASTY2(16)              | ,501   | ,330 | 2,305   | 1  | ,129 | 1,650  | ,864                | 3,151 |
| VASTY2(17)              | -1,075 | ,418 | 6,615   | 1  | ,010 | ,341   | ,150                | ,774  |
| VASTY2(18)              | -,590  | ,371 | 2,526   | 1  | ,112 | ,555   | ,268                | 1,147 |
| VASTY2(19)              | -1,719 | ,552 | 9,710   | 1  | ,002 | ,179   | ,061                | ,529  |
| VASTY2(20)              | ,061   | ,314 | ,037    | 1  | ,847 | 1,063  | ,574                | 1,967 |
| VASTY2(21)              | -,067  | ,312 | ,046    | 1  | ,829 | ,935   | ,507                | 1,723 |
| VASTY2(22)              | ,247   | ,290 | ,729    | 1  | ,393 | 1,281  | ,726                | 2,259 |
| VASTY2(23)              | ,303   | ,288 | 1,104   | 1  | ,293 | 1,353  | ,770                | 2,379 |
| VASTY2(24)              | ,316   | ,285 | 1,230   | 1  | ,267 | 1,371  | ,785                | 2,396 |
| VASTY2(25)              | ,377   | ,301 | 1,567   | 1  | ,211 | 1,458  | ,808                | 2,632 |
| VASTY2(26)              | -,881  | ,418 | 4,429   | 1  | ,035 | ,415   | ,183                | ,941  |
| VASTY2(27)              | -1,469 | ,466 | 9,917   | 1  | ,002 | ,230   | ,092                | ,574  |
| VASTY2(28)              | -1,024 | ,471 | 4,721   | 1  | ,030 | ,359   | ,143                | ,905  |
| VASTY2(29)              | -1,110 | ,406 | 7,480   | 1  | ,006 | ,329   | ,149                | ,730  |
| VASTY2(30)              | -,112  | ,316 | ,126    | 1  | ,723 | ,894   | ,481                | 1,661 |
| VASTY2(31)              | ,591   | ,283 | 4,348   | 1  | ,037 | 1,806  | 1,036               | 3,147 |
| VASTY2(32)              | ,002   | ,319 | ,000    | 1  | ,994 | 1,002  | ,536                | 1,875 |
| VASTY2(33)              | ,090   | ,313 | ,083    | 1  | ,773 | 1,095  | ,593                | 2,021 |
| VASTY2(34)              | -1,232 | ,438 | 7,897   | 1  | ,005 | ,292   | ,124                | ,689  |
| VASTY2(35)              | ,722   | ,276 | 6,854   | 1  | ,009 | 2,059  | 1,199               | 3,536 |
| Constant                | -2,724 | ,221 | 152,364 | 1  | ,000 | ,066   |                     |       |

a. Variable(s) entered on step 1: sv3, VASTY2.



```

LOGISTIC REGRESSION VARIABLES luonnelt1
/METHOD=ENTER sv5 VASTY2
/CONTRAST (sv5)=Indicator(1)
/CONTRAST (VASTY2)=Indicator(1)
/PRINT=CI(95)
/CRITERIA=PIN(0.05) POUT(0.10) ITERATE(20) CUT(0.5).

```

## Block 1: Method = Enter

### Omnibus Tests of Model Coefficients

|        |       | Chi-square | df | Sig. |
|--------|-------|------------|----|------|
| Step 1 | Step  | 312,321    | 39 | ,000 |
|        | Block | 312,321    | 39 | ,000 |
|        | Model | 312,321    | 39 | ,000 |

### Model Summary

| Step | -2 Log likelihood    | Cox & Snell R Square | Nagelkerke R Square |
|------|----------------------|----------------------|---------------------|
| 1    | 5884,55 <sup>a</sup> | ,025                 | ,063                |

a. Estimation terminated at iteration number 7 because parameter estimates changed by less than ,001.

### Classification Table<sup>a</sup>

|                    |                                                              | Predicted                          |                                              |
|--------------------|--------------------------------------------------------------|------------------------------------|----------------------------------------------|
|                    |                                                              | luonnelt1<br>luonne<br>highest = . | 0 ingen<br>händelse<br>eller läheltä<br>piti |
|                    | Observed                                                     |                                    |                                              |
| Step 1             | luonnelt1 luonne highest = tapahtui potilaalle               | 11627                              | 848                                          |
|                    | 0 ingen händelse eller läheltä piti<br>1 tapahtui potilaalle |                                    |                                              |
| Overall Percentage |                                                              |                                    |                                              |

**Classification Table<sup>a</sup>**

|                    |                                                   |                                     | Predicted                            |
|--------------------|---------------------------------------------------|-------------------------------------|--------------------------------------|
|                    |                                                   |                                     | luonnelt1<br>luonne<br>highest = ... |
| Observed           |                                                   |                                     | 1 tapahtui<br>potilaalle             |
| Step 1             | luonnelt1 luonne highest = tapahtui<br>potilaalle | 0 ingen händelse eller läheltä piti | 0                                    |
|                    |                                                   | 1 tapahtui potilaalle               | 0                                    |
| Overall Percentage |                                                   |                                     |                                      |

**Classification Table<sup>a</sup>**

|                    |                                                   |                                     | Predicted             |
|--------------------|---------------------------------------------------|-------------------------------------|-----------------------|
|                    |                                                   |                                     | Percentage<br>Correct |
| Observed           |                                                   |                                     |                       |
| Step 1             | luonnelt1 luonne highest = tapahtui<br>potilaalle | 0 ingen händelse eller läheltä piti | 100,0                 |
|                    |                                                   | 1 tapahtui potilaalle               | ,0                    |
| Overall Percentage |                                                   |                                     | 93,2                  |

a. The cut value is ,500

**Variables in the Equation**

|                     | B      | S.E. | Wald    | df | Sig. | Exp(B) | 95% C.I. for EXP(B) |       |
|---------------------|--------|------|---------|----|------|--------|---------------------|-------|
|                     |        |      |         |    |      |        | Lower               | Upper |
| Step 1 <sup>a</sup> |        |      |         |    |      |        |                     |       |
| sv5                 |        |      | 5,125   | 4  | ,275 |        |                     |       |
| sv5(1)              | -,090  | ,133 | ,453    | 1  | ,501 | ,914   | ,704                | 1,187 |
| sv5(2)              | -,027  | ,136 | ,040    | 1  | ,842 | ,973   | ,746                | 1,271 |
| sv5(3)              | ,009   | ,124 | ,005    | 1  | ,944 | 1,009  | ,791                | 1,287 |
| sv5(4)              | ,207   | ,133 | 2,422   | 1  | ,120 | 1,230  | ,948                | 1,598 |
| VASTY2              |        |      | 231,791 | 35 | ,000 |        |                     |       |
| VASTY2(1)           | ,055   | ,300 | ,034    | 1  | ,854 | 1,057  | ,587                | 1,903 |
| VASTY2(2)           | ,454   | ,280 | 2,626   | 1  | ,105 | 1,575  | ,909                | 2,728 |
| VASTY2(3)           | -1,378 | ,465 | 8,785   | 1  | ,003 | ,252   | ,101                | ,627  |
| VASTY2(4)           | ,225   | ,292 | ,594    | 1  | ,441 | 1,252  | ,707                | 2,220 |
| VASTY2(5)           | -,116  | ,326 | ,126    | 1  | ,722 | ,890   | ,470                | 1,688 |
| VASTY2(6)           | -1,405 | ,446 | 9,928   | 1  | ,002 | ,245   | ,102                | ,588  |
| VASTY2(7)           | ,659   | ,272 | 5,868   | 1  | ,015 | 1,933  | 1,134               | 3,296 |
| VASTY2(8)           | -,176  | ,320 | ,302    | 1  | ,583 | ,839   | ,448                | 1,572 |
| VASTY2(9)           | ,325   | ,290 | 1,256   | 1  | ,263 | 1,384  | ,784                | 2,444 |
| VASTY2(10)          | ,929   | ,267 | 12,153  | 1  | ,000 | 2,532  | 1,502               | 4,270 |
| VASTY2(11)          | ,629   | ,272 | 5,343   | 1  | ,021 | 1,875  | 1,100               | 3,196 |
| VASTY2(12)          | ,074   | ,298 | ,062    | 1  | ,804 | 1,077  | ,601                | 1,931 |
| VASTY2(13)          | ,923   | ,267 | 11,931  | 1  | ,001 | 2,518  | 1,491               | 4,252 |
| VASTY2(14)          | -,286  | ,322 | ,790    | 1  | ,374 | ,751   | ,400                | 1,412 |
| VASTY2(15)          | ,171   | ,293 | ,342    | 1  | ,559 | 1,187  | ,668                | 2,108 |
| VASTY2(16)          | ,476   | ,331 | 2,065   | 1  | ,151 | 1,609  | ,841                | 3,079 |
| VASTY2(17)          | -1,084 | ,418 | 6,723   | 1  | ,010 | ,338   | ,149                | ,768  |
| VASTY2(18)          | -,589  | ,375 | 2,465   | 1  | ,116 | ,555   | ,266                | 1,158 |
| VASTY2(19)          | -1,717 | ,555 | 9,571   | 1  | ,002 | ,180   | ,061                | ,533  |
| VASTY2(20)          | ,028   | ,316 | ,008    | 1  | ,929 | 1,029  | ,554                | 1,911 |
| VASTY2(21)          | -,076  | ,312 | ,059    | 1  | ,807 | ,927   | ,503                | 1,708 |
| VASTY2(22)          | ,244   | ,290 | ,709    | 1  | ,400 | 1,276  | ,723                | 2,252 |
| VASTY2(23)          | ,296   | ,288 | 1,060   | 1  | ,303 | 1,345  | ,765                | 2,365 |
| VASTY2(24)          | ,302   | ,285 | 1,122   | 1  | ,290 | 1,353  | ,773                | 2,365 |
| VASTY2(25)          | ,361   | ,302 | 1,436   | 1  | ,231 | 1,435  | ,795                | 2,592 |
| VASTY2(26)          | -,883  | ,419 | 4,447   | 1  | ,035 | ,414   | ,182                | ,940  |
| VASTY2(27)          | -1,493 | ,467 | 10,210  | 1  | ,001 | ,225   | ,090                | ,561  |
| VASTY2(28)          | -1,098 | ,476 | 5,322   | 1  | ,021 | ,334   | ,131                | ,848  |
| VASTY2(29)          | -1,189 | ,412 | 8,328   | 1  | ,004 | ,305   | ,136                | ,683  |
| VASTY2(30)          | -,120  | ,316 | ,145    | 1  | ,704 | ,887   | ,477                | 1,648 |
| VASTY2(31)          | ,586   | ,286 | 4,181   | 1  | ,041 | 1,796  | 1,025               | 3,149 |
| VASTY2(32)          | ,002   | ,324 | ,000    | 1  | ,994 | 1,002  | ,531                | 1,892 |
| VASTY2(33)          | ,092   | ,319 | ,084    | 1  | ,772 | 1,097  | ,587                | 2,048 |
| VASTY2(34)          | -1,236 | ,438 | 7,945   | 1  | ,005 | ,291   | ,123                | ,686  |
| VASTY2(35)          | ,728   | ,276 | 6,954   | 1  | ,008 | 2,072  | 1,206               | 3,560 |
| Constant            | -2,696 | ,229 | 138,940 | 1  | ,000 | ,067   |                     |       |

a. Variable(s) entered on step 1: sv5, VASTY2.

```
LOGISTIC REGRESSION VARIABLES luonnelt1
/METHOD=ENTER sv7 VASTY2
/CONTRAST (sv7)=Indicator(1)
/CONTRAST (VASTY2)=Indicator(1)
/PRINT=CI(95)
/CRITERIA=PIN(0.05) POUT(0.10) ITERATE(20) CUT(0.5).
```

## Block 1: Method = Enter

### Omnibus Tests of Model Coefficients

|        |       | Chi-square | df | Sig. |
|--------|-------|------------|----|------|
| Step 1 | Step  | 315,273    | 41 | ,000 |
|        | Block | 315,273    | 41 | ,000 |
|        | Model | 315,273    | 41 | ,000 |

### Model Summary

| Step | -2 Log likelihood    | Cox & Snell R Square | Nagelkerke R Square |
|------|----------------------|----------------------|---------------------|
| 1    | 5881,60 <sup>a</sup> | ,025                 | ,064                |

a. Estimation terminated at iteration number 7 because parameter estimates changed by less than ,001.

### Classification Table<sup>a</sup>

|                    |                                                | Predicted                                                    |                                     |
|--------------------|------------------------------------------------|--------------------------------------------------------------|-------------------------------------|
|                    |                                                | luonnelt1 luonne highest = ...                               | 0 ingen händelse eller läheltä piti |
| Observed           |                                                |                                                              |                                     |
| Step 1             | luonnelt1 luonne highest = tapahtui potilaalle | 0 ingen händelse eller läheltä piti<br>1 tapahtui potilaalle | 11627<br>848                        |
| Overall Percentage |                                                |                                                              |                                     |

**Classification Table<sup>a</sup>**

|                    |                                                   |                                     | Predicted                            |
|--------------------|---------------------------------------------------|-------------------------------------|--------------------------------------|
|                    |                                                   |                                     | luonnelt1<br>luonne<br>highest = ... |
| Observed           |                                                   |                                     | 1 tapahtui<br>potilaalle             |
| Step 1             | luonnelt1 luonne highest = tapahtui<br>potilaalle | 0 ingen händelse eller läheltä piti | 0                                    |
|                    |                                                   | 1 tapahtui potilaalle               | 0                                    |
| Overall Percentage |                                                   |                                     |                                      |

**Classification Table<sup>a</sup>**

|                    |                                                   |                                     | Predicted             |
|--------------------|---------------------------------------------------|-------------------------------------|-----------------------|
|                    |                                                   |                                     | Percentage<br>Correct |
| Observed           |                                                   |                                     |                       |
| Step 1             | luonnelt1 luonne highest = tapahtui<br>potilaalle | 0 ingen händelse eller läheltä piti | 100,0                 |
|                    |                                                   | 1 tapahtui potilaalle               | ,0                    |
| Overall Percentage |                                                   |                                     | 93,2                  |

a. The cut value is ,500

**Variables in the Equation**

|                         | B      | S.E. | Wald    | df | Sig. | Exp(B) | 95% C.I. for EXP(B) |       |
|-------------------------|--------|------|---------|----|------|--------|---------------------|-------|
|                         |        |      |         |    |      |        | Lower               | Upper |
| Step 1 <sup>a</sup> sv7 |        |      | 8,031   | 6  | ,236 |        |                     |       |
| sv7(1)                  | -,244  | ,152 | 2,596   | 1  | ,107 | ,783   | ,582                | 1,054 |
| sv7(2)                  | -,090  | ,158 | ,327    | 1  | ,567 | ,914   | ,671                | 1,245 |
| sv7(3)                  | -,111  | ,156 | ,507    | 1  | ,477 | ,895   | ,659                | 1,215 |
| sv7(4)                  | -,060  | ,146 | ,168    | 1  | ,682 | ,942   | ,707                | 1,255 |
| sv7(5)                  | -,014  | ,138 | ,010    | 1  | ,921 | ,986   | ,752                | 1,293 |
| sv7(6)                  | ,204   | ,153 | 1,765   | 1  | ,184 | 1,226  | ,908                | 1,655 |
| VASTY2                  |        |      | 232,195 | 35 | ,000 |        |                     |       |
| VASTY2(1)               | ,068   | ,300 | ,051    | 1  | ,821 | 1,070  | ,594                | 1,928 |
| VASTY2(2)               | ,447   | ,281 | 2,537   | 1  | ,111 | 1,564  | ,902                | 2,712 |
| VASTY2(3)               | -1,383 | ,465 | 8,849   | 1  | ,003 | ,251   | ,101                | ,624  |
| VASTY2(4)               | ,225   | ,292 | ,592    | 1  | ,442 | 1,252  | ,706                | 2,221 |
| VASTY2(5)               | -,099  | ,326 | ,092    | 1  | ,761 | ,906   | ,478                | 1,717 |
| VASTY2(6)               | -1,447 | ,449 | 10,396  | 1  | ,001 | ,235   | ,098                | ,567  |
| VASTY2(7)               | ,661   | ,272 | 5,890   | 1  | ,015 | 1,936  | 1,135               | 3,300 |
| VASTY2(8)               | -,178  | ,321 | ,308    | 1  | ,579 | ,837   | ,447                | 1,569 |
| VASTY2(9)               | ,323   | ,290 | 1,240   | 1  | ,266 | 1,381  | ,782                | 2,440 |
| VASTY2(10)              | ,921   | ,267 | 11,865  | 1  | ,001 | 2,511  | 1,487               | 4,240 |
| VASTY2(11)              | ,640   | ,272 | 5,515   | 1  | ,019 | 1,896  | 1,112               | 3,233 |
| VASTY2(12)              | ,077   | ,298 | ,066    | 1  | ,797 | 1,080  | ,602                | 1,935 |
| VASTY2(13)              | ,913   | ,268 | 11,580  | 1  | ,001 | 2,491  | 1,472               | 4,213 |
| VASTY2(14)              | -,287  | ,322 | ,794    | 1  | ,373 | ,750   | ,399                | 1,411 |
| VASTY2(15)              | ,164   | ,294 | ,310    | 1  | ,577 | 1,178  | ,662                | 2,096 |
| VASTY2(16)              | ,467   | ,332 | 1,983   | 1  | ,159 | 1,596  | ,833                | 3,059 |
| VASTY2(17)              | -1,077 | ,418 | 6,623   | 1  | ,010 | ,341   | ,150                | ,774  |
| VASTY2(18)              | -,507  | ,378 | 1,795   | 1  | ,180 | ,602   | ,287                | 1,264 |
| VASTY2(19)              | -1,627 | ,558 | 8,509   | 1  | ,004 | ,196   | ,066                | ,586  |
| VASTY2(20)              | ,016   | ,317 | ,002    | 1  | ,960 | 1,016  | ,546                | 1,890 |
| VASTY2(21)              | -,072  | ,312 | ,053    | 1  | ,817 | ,931   | ,505                | 1,715 |
| VASTY2(22)              | ,247   | ,290 | ,728    | 1  | ,393 | 1,280  | ,726                | 2,259 |
| VASTY2(23)              | ,303   | ,288 | 1,108   | 1  | ,293 | 1,354  | ,770                | 2,381 |
| VASTY2(24)              | ,302   | ,285 | 1,123   | 1  | ,289 | 1,353  | ,774                | 2,367 |
| VASTY2(25)              | ,369   | ,302 | 1,499   | 1  | ,221 | 1,447  | ,801                | 2,613 |
| VASTY2(26)              | -,878  | ,419 | 4,400   | 1  | ,036 | ,416   | ,183                | ,944  |
| VASTY2(27)              | -1,506 | ,468 | 10,348  | 1  | ,001 | ,222   | ,089                | ,555  |
| VASTY2(28)              | -1,152 | ,480 | 5,766   | 1  | ,016 | ,316   | ,123                | ,809  |
| VASTY2(29)              | -1,245 | ,417 | 8,931   | 1  | ,003 | ,288   | ,127                | ,651  |
| VASTY2(30)              | -,114  | ,316 | ,130    | 1  | ,718 | ,892   | ,480                | 1,659 |
| VASTY2(31)              | ,641   | ,287 | 4,983   | 1  | ,026 | 1,899  | 1,081               | 3,334 |
| VASTY2(32)              | ,084   | ,328 | ,066    | 1  | ,797 | 1,088  | ,572                | 2,069 |
| VASTY2(33)              | ,182   | ,324 | ,314    | 1  | ,575 | 1,199  | ,636                | 2,263 |
| VASTY2(34)              | -1,234 | ,438 | 7,924   | 1  | ,005 | ,291   | ,123                | ,687  |

**Variables in the Equation**

|            | B      | S.E. | Wald    | df | Sig. | Exp(B) | 95% C.I. for EXP(B) |       |
|------------|--------|------|---------|----|------|--------|---------------------|-------|
|            |        |      |         |    |      |        | Lower               | Upper |
| VASTY2(35) | ,739   | ,277 | 7,138   | 1  | ,008 | 2,094  | 1,218               | 3,600 |
| Constant   | -2,631 | ,233 | 127,277 | 1  | ,000 | ,072   |                     |       |

a. Variable(s) entered on step 1: sv7, VASTY2.

\*\*

LOGISTIC REGRESSION VARIABLES seurauslt3

/METHOD=ENTER bv1 VASTY2

/CONTRAST (bv1)=Indicator(1)

/CONTRAST (VASTY2)=Indicator(1)

/PRINT=CI(95)

/CRITERIA=PIN(0.05) POUT(0.10) ITERATE(20) CUT(0.5).

**Block 1: Method = Enter**

**Omnibus Tests of Model Coefficients**

|        |       | Chi-square | df | Sig. |
|--------|-------|------------|----|------|
| Step 1 | Step  | 300,184    | 37 | ,000 |
|        | Block | 300,184    | 37 | ,000 |
|        | Model | 300,184    | 37 | ,000 |

**Model Summary**

| Step | -2 Log likelihood    | Cox & Snell R Square | Nagelkerke R Square |
|------|----------------------|----------------------|---------------------|
| 1    | 3238,86 <sup>a</sup> | ,024                 | ,096                |

a. Estimation terminated at iteration number 9 because parameter estimates changed by less than ,001.

**Classification Table<sup>a</sup>**

| Observed           |                                                     | Predicted                         |
|--------------------|-----------------------------------------------------|-----------------------------------|
|                    |                                                     | seurauslt3 seuraus highest = ...  |
| Step 1             | seurauslt3 seuraus highest = haittaa (i någon form) | 0 ingen händelse eller ei haittaa |
|                    |                                                     | 1 haittaa (i någon form)          |
| Overall Percentage |                                                     | 12075<br>400                      |

**Classification Table<sup>a</sup>**

| Observed           |                                                     | Predicted                         |
|--------------------|-----------------------------------------------------|-----------------------------------|
|                    |                                                     | seurauslt3 seuraus highest = ...  |
| Step 1             | seurauslt3 seuraus highest = haittaa (i någon form) | 1 haittaa (i någon form)          |
|                    |                                                     | 0 ingen händelse eller ei haittaa |
| Overall Percentage |                                                     | 0<br>0                            |

**Classification Table<sup>a</sup>**

| Observed           |                                                     | Predicted          |
|--------------------|-----------------------------------------------------|--------------------|
|                    |                                                     | Percentage Correct |
| Step 1             | seurauslt3 seuraus highest = haittaa (i någon form) | 100,0              |
|                    |                                                     | ,0                 |
| Overall Percentage |                                                     | 96,8               |

a. The cut value is ,500



**Variables in the Equation**

|                         | B      | S.E.  | Wald    | df | Sig. | Exp(B) | 95% C.I. for EXP(B) |       |
|-------------------------|--------|-------|---------|----|------|--------|---------------------|-------|
|                         |        |       |         |    |      |        | Lower               | Upper |
| Step 1 <sup>a</sup> bv1 |        |       | 4,262   | 2  | ,119 |        |                     |       |
| bv1(1)                  | -,197  | ,148  | 1,765   | 1  | ,184 | ,821   | ,614                | 1,098 |
| bv1(2)                  | ,124   | ,119  | 1,076   | 1  | ,300 | 1,132  | ,896                | 1,430 |
| VASTY2                  |        |       | 224,461 | 35 | ,000 |        |                     |       |
| VASTY2(1)               | ,598   | ,424  | 1,990   | 1  | ,158 | 1,818  | ,792                | 4,170 |
| VASTY2(2)               | 1,196  | ,389  | 9,428   | 1  | ,002 | 3,306  | 1,541               | 7,093 |
| VASTY2(3)               | -1,630 | ,787  | 4,283   | 1  | ,038 | ,196   | ,042                | ,917  |
| VASTY2(4)               | ,446   | ,431  | 1,070   | 1  | ,301 | 1,561  | ,671                | 3,633 |
| VASTY2(5)               | ,447   | ,441  | 1,025   | 1  | ,311 | 1,563  | ,658                | 3,710 |
| VASTY2(6)               | -1,585 | ,786  | 4,062   | 1  | ,044 | ,205   | ,044                | ,957  |
| VASTY2(7)               | ,558   | ,425  | 1,726   | 1  | ,189 | 1,747  | ,760                | 4,014 |
| VASTY2(8)               | ,242   | ,448  | ,291    | 1  | ,590 | 1,273  | ,529                | 3,065 |
| VASTY2(9)               | 1,083  | ,398  | 7,419   | 1  | ,006 | 2,954  | 1,355               | 6,442 |
| VASTY2(10)              | 1,445  | ,380  | 14,450  | 1  | ,000 | 4,244  | 2,014               | 8,942 |
| VASTY2(11)              | 1,131  | ,393  | 8,286   | 1  | ,004 | 3,098  | 1,435               | 6,690 |
| VASTY2(12)              | ,610   | ,420  | 2,110   | 1  | ,146 | 1,840  | ,808                | 4,189 |
| VASTY2(13)              | 1,428  | ,382  | 14,000  | 1  | ,000 | 4,172  | 1,974               | 8,815 |
| VASTY2(14)              | ,154   | ,457  | ,113    | 1  | ,737 | 1,166  | ,476                | 2,855 |
| VASTY2(15)              | -1,562 | ,786  | 3,953   | 1  | ,047 | ,210   | ,045                | ,978  |
| VASTY2(16)              | -,398  | ,674  | ,349    | 1  | ,555 | ,672   | ,179                | 2,516 |
| VASTY2(17)              | -,240  | ,510  | ,221    | 1  | ,638 | ,787   | ,290                | 2,137 |
| VASTY2(18)              | -1,109 | ,671  | 2,732   | 1  | ,098 | ,330   | ,088                | 1,229 |
| VASTY2(19)              | -2,077 | 1,061 | 3,833   | 1  | ,050 | ,125   | ,016                | 1,002 |
| VASTY2(20)              | ,452   | ,450  | 1,010   | 1  | ,315 | 1,572  | ,651                | 3,795 |
| VASTY2(21)              | -1,553 | ,786  | 3,907   | 1  | ,048 | ,212   | ,045                | ,987  |
| VASTY2(22)              | -,763  | ,606  | 1,581   | 1  | ,209 | ,466   | ,142                | 1,531 |
| VASTY2(23)              | ,221   | ,456  | ,236    | 1  | ,627 | 1,248  | ,511                | 3,049 |
| VASTY2(24)              | -,910  | ,607  | 2,246   | 1  | ,134 | ,403   | ,122                | 1,323 |
| VASTY2(25)              | -1,288 | ,786  | 2,688   | 1  | ,101 | ,276   | ,059                | 1,286 |
| VASTY2(26)              | -2,035 | 1,057 | 3,701   | 1  | ,054 | ,131   | ,016                | 1,039 |
| VASTY2(27)              | -,885  | ,607  | 2,129   | 1  | ,145 | ,413   | ,126                | 1,355 |
| VASTY2(28)              | -,184  | ,566  | ,106    | 1  | ,745 | ,832   | ,275                | 2,520 |
| VASTY2(29)              | -,455  | ,533  | ,731    | 1  | ,393 | ,634   | ,223                | 1,802 |
| VASTY2(30)              | -,294  | ,510  | ,333    | 1  | ,564 | ,745   | ,274                | 2,024 |
| VASTY2(31)              | 1,255  | ,389  | 10,390  | 1  | ,001 | 3,507  | 1,635               | 7,523 |
| VASTY2(32)              | -,214  | ,511  | ,175    | 1  | ,675 | ,807   | ,297                | 2,198 |
| VASTY2(33)              | -,236  | ,510  | ,213    | 1  | ,644 | ,790   | ,291                | 2,148 |
| VASTY2(34)              | -1,133 | ,671  | 2,852   | 1  | ,091 | ,322   | ,086                | 1,200 |
| VASTY2(35)              | ,075   | ,481  | ,024    | 1  | ,876 | 1,078  | ,420                | 2,766 |
| Constant                | -3,641 | ,341  | 114,195 | 1  | ,000 | ,026   |                     |       |

a. Variable(s) entered on step 1: bv1, VASTY2.

```

LOGISTIC REGRESSION VARIABLES seurauslt3
/METHOD=ENTER bv2 VASTY2
/CONTRAST (bv2)=Indicator(1)
/CONTRAST (VASTY2)=Indicator(1)
/PRINT=CI(95)
/CRITERIA=PIN(0.05) POUT(0.10) ITERATE(20) CUT(0.5).

```

## Block 1: Method = Enter

### Omnibus Tests of Model Coefficients

|        |       | Chi-square | df | Sig. |
|--------|-------|------------|----|------|
| Step 1 | Step  | 297,735    | 37 | ,000 |
|        | Block | 297,735    | 37 | ,000 |
|        | Model | 297,735    | 37 | ,000 |

### Model Summary

| Step | -2 Log likelihood    | Cox & Snell R Square | Nagelkerke R Square |
|------|----------------------|----------------------|---------------------|
| 1    | 3241,31 <sup>a</sup> | ,024                 | ,095                |

a. Estimation terminated at iteration number 9 because parameter estimates changed by less than ,001.

### Classification Table<sup>a</sup>

|          |                                                    | Predicted                                                    |
|----------|----------------------------------------------------|--------------------------------------------------------------|
|          |                                                    | seorauslt3 seuraus highest = ...                             |
|          |                                                    | 0 ingen händelse eller ei haittaa                            |
| Observed |                                                    |                                                              |
| Step 1   | seorauslt3 seuraus highest = haitta (i någon form) | 0 ingen händelse eller ei haittaa<br>1 haitta (i någon form) |
|          | Overall Percentage                                 | 12075<br>400                                                 |

**Classification Table<sup>a</sup>**

| Observed           |                                                       | Predicted                                                    |                               |
|--------------------|-------------------------------------------------------|--------------------------------------------------------------|-------------------------------|
|                    |                                                       | seurauslt3<br>seuraus<br>highest = ...                       | 1 haitta (i<br>någon<br>form) |
| Step 1             | seurauslt3 seuraus highest = haitta (i<br>någon form) | 0 ingen händelse eller ei haittaa<br>1 haitta (i någon form) | 0<br>0                        |
| Overall Percentage |                                                       |                                                              |                               |

**Classification Table<sup>a</sup>**

| Observed           |                                                       | Predicted                                                    |             |
|--------------------|-------------------------------------------------------|--------------------------------------------------------------|-------------|
|                    |                                                       | Percentage<br>Correct                                        |             |
| Step 1             | seurauslt3 seuraus highest = haitta (i<br>någon form) | 0 ingen händelse eller ei haittaa<br>1 haitta (i någon form) | 100,0<br>,0 |
| Overall Percentage |                                                       |                                                              | 96,8        |

a. The cut value is ,500

**Variables in the Equation**

|                         | B      | S.E.  | Wald    | df | Sig. | Exp(B) | 95% C.I. for EXP(B) |       |
|-------------------------|--------|-------|---------|----|------|--------|---------------------|-------|
|                         |        |       |         |    |      |        | Lower               | Upper |
| Step 1 <sup>a</sup> bv2 |        |       | 1,904   | 2  | ,386 |        |                     |       |
| bv2(1)                  | ,023   | ,149  | ,023    | 1  | ,879 | 1,023  | ,764                | 1,370 |
| bv2(2)                  | ,161   | ,135  | 1,416   | 1  | ,234 | 1,174  | ,901                | 1,530 |
| VASTY2                  |        |       | 226,913 | 35 | ,000 |        |                     |       |
| VASTY2(1)               | ,590   | ,424  | 1,939   | 1  | ,164 | 1,804  | ,786                | 4,138 |
| VASTY2(2)               | 1,208  | ,390  | 9,621   | 1  | ,002 | 3,347  | 1,560               | 7,182 |
| VASTY2(3)               | -1,592 | ,787  | 4,094   | 1  | ,043 | ,203   | ,044                | ,951  |
| VASTY2(4)               | ,472   | ,430  | 1,202   | 1  | ,273 | 1,603  | ,690                | 3,727 |
| VASTY2(5)               | ,454   | ,441  | 1,058   | 1  | ,304 | 1,574  | ,663                | 3,736 |
| VASTY2(6)               | -1,565 | ,786  | 3,965   | 1  | ,046 | ,209   | ,045                | ,976  |
| VASTY2(7)               | ,587   | ,423  | 1,923   | 1  | ,165 | 1,798  | ,785                | 4,122 |
| VASTY2(8)               | ,259   | ,448  | ,333    | 1  | ,564 | 1,295  | ,538                | 3,119 |
| VASTY2(9)               | 1,098  | ,398  | 7,622   | 1  | ,006 | 2,998  | 1,375               | 6,538 |
| VASTY2(10)              | 1,470  | ,380  | 14,928  | 1  | ,000 | 4,347  | 2,063               | 9,162 |
| VASTY2(11)              | 1,134  | ,393  | 8,342   | 1  | ,004 | 3,107  | 1,440               | 6,707 |
| VASTY2(12)              | ,630   | ,420  | 2,250   | 1  | ,134 | 1,877  | ,824                | 4,275 |
| VASTY2(13)              | 1,461  | ,382  | 14,620  | 1  | ,000 | 4,309  | 2,038               | 9,112 |
| VASTY2(14)              | ,165   | ,457  | ,131    | 1  | ,718 | 1,179  | ,482                | 2,887 |
| VASTY2(15)              | -1,555 | ,786  | 3,916   | 1  | ,048 | ,211   | ,045                | ,985  |
| VASTY2(16)              | -,406  | ,673  | ,364    | 1  | ,546 | ,666   | ,178                | 2,493 |
| VASTY2(17)              | -,261  | ,510  | ,262    | 1  | ,609 | ,770   | ,284                | 2,093 |
| VASTY2(18)              | -1,125 | ,671  | 2,809   | 1  | ,094 | ,325   | ,087                | 1,210 |
| VASTY2(19)              | -2,191 | 1,059 | 4,282   | 1  | ,039 | ,112   | ,014                | ,891  |
| VASTY2(20)              | ,462   | ,449  | 1,057   | 1  | ,304 | 1,587  | ,658                | 3,828 |
| VASTY2(21)              | -1,547 | ,786  | 3,881   | 1  | ,049 | ,213   | ,046                | ,992  |
| VASTY2(22)              | -,794  | ,607  | 1,715   | 1  | ,190 | ,452   | ,138                | 1,484 |
| VASTY2(23)              | ,207   | ,456  | ,207    | 1  | ,649 | 1,230  | ,504                | 3,006 |
| VASTY2(24)              | -,884  | ,607  | 2,123   | 1  | ,145 | ,413   | ,126                | 1,357 |
| VASTY2(25)              | -1,292 | ,786  | 2,704   | 1  | ,100 | ,275   | ,059                | 1,281 |
| VASTY2(26)              | -2,030 | 1,057 | 3,684   | 1  | ,055 | ,131   | ,017                | 1,044 |
| VASTY2(27)              | -,878  | ,607  | 2,092   | 1  | ,148 | ,416   | ,127                | 1,365 |
| VASTY2(28)              | -,153  | ,566  | ,073    | 1  | ,787 | ,858   | ,283                | 2,602 |
| VASTY2(29)              | -,437  | ,533  | ,673    | 1  | ,412 | ,646   | ,227                | 1,835 |
| VASTY2(30)              | -,281  | ,510  | ,303    | 1  | ,582 | ,755   | ,278                | 2,051 |
| VASTY2(31)              | 1,235  | ,388  | 10,110  | 1  | ,001 | 3,439  | 1,606               | 7,364 |
| VASTY2(32)              | -,250  | ,510  | ,240    | 1  | ,624 | ,779   | ,286                | 2,116 |
| VASTY2(33)              | -,259  | ,510  | ,259    | 1  | ,611 | ,772   | ,284                | 2,096 |
| VASTY2(34)              | -1,128 | ,671  | 2,824   | 1  | ,093 | ,324   | ,087                | 1,206 |
| VASTY2(35)              | ,092   | ,480  | ,036    | 1  | ,849 | 1,096  | ,428                | 2,807 |
| Constant                | -3,728 | ,349  | 114,019 | 1  | ,000 | ,024   |                     |       |

a. Variable(s) entered on step 1: bv2, VASTY2.

```

LOGISTIC REGRESSION VARIABLES seurauslt3
/METHOD=ENTER bv3 VASTY2
/CONTRAST (bv3)=Indicator(1)
/CONTRAST (VASTY2)=Indicator(1)
/PRINT=CI(95)
/CRITERIA=PIN(0.05) POUT(0.10) ITERATE(20) CUT(0.5).

```

## Block 1: Method = Enter

### Omnibus Tests of Model Coefficients

|        |       | Chi-square | df | Sig. |
|--------|-------|------------|----|------|
| Step 1 | Step  | 297,547    | 37 | ,000 |
|        | Block | 297,547    | 37 | ,000 |
|        | Model | 297,547    | 37 | ,000 |

### Model Summary

| Step | -2 Log likelihood    | Cox & Snell R Square | Nagelkerke R Square |
|------|----------------------|----------------------|---------------------|
| 1    | 3241,50 <sup>a</sup> | ,024                 | ,095                |

a. Estimation terminated at iteration number 9 because parameter estimates changed by less than ,001.

### Classification Table<sup>a</sup>

|                    |                                                    | Predicted                         |
|--------------------|----------------------------------------------------|-----------------------------------|
|                    |                                                    | seorauslt3 seuraus highest = ...  |
| Observed           |                                                    | 0 ingen händelse eller ei haittaa |
| Step 1             | seorauslt3 seuraus highest = haitta (i någon form) | 12075                             |
|                    | 0 ingen händelse eller ei haittaa                  | 400                               |
|                    | 1 haitta (i någon form)                            |                                   |
| Overall Percentage |                                                    |                                   |

**Classification Table<sup>a</sup>**

| Observed |                                                    | Predicted                         |
|----------|----------------------------------------------------|-----------------------------------|
|          |                                                    | seurauslt3 seuraus highest = ...  |
|          | 1 haitta (i någon form)                            |                                   |
| Step 1   | seurauslt3 seuraus highest = haitta (i någon form) | 0 ingen händelse eller ei haittaa |
|          |                                                    | 1 haitta (i någon form)           |
|          | Overall Percentage                                 | 0<br>0                            |

**Classification Table<sup>a</sup>**

| Observed |                                                    | Predicted                         |
|----------|----------------------------------------------------|-----------------------------------|
|          |                                                    | Percentage Correct                |
|          | seurauslt3 seuraus highest = haitta (i någon form) |                                   |
| Step 1   | seurauslt3 seuraus highest = haitta (i någon form) | 0 ingen händelse eller ei haittaa |
|          |                                                    | 1 haitta (i någon form)           |
|          | Overall Percentage                                 | 100,0<br>,0<br>96,8               |

a. The cut value is ,500

**Variables in the Equation**

|                         | B      | S.E.  | Wald    | df | Sig. | Exp(B) | 95% C.I. for EXP(B) |       |
|-------------------------|--------|-------|---------|----|------|--------|---------------------|-------|
|                         |        |       |         |    |      |        | Lower               | Upper |
| Step 1 <sup>a</sup> bv3 |        |       | 1,703   | 2  | ,427 |        |                     |       |
| bv3(1)                  | -,161  | ,197  | ,671    | 1  | ,413 | ,851   | ,578                | 1,252 |
| bv3(2)                  | ,132   | ,148  | ,788    | 1  | ,375 | 1,141  | ,853                | 1,525 |
| VASTY2                  |        |       | 230,109 | 35 | ,000 |        |                     |       |
| VASTY2(1)               | ,614   | ,424  | 2,101   | 1  | ,147 | 1,848  | ,805                | 4,241 |
| VASTY2(2)               | 1,220  | ,389  | 9,836   | 1  | ,002 | 3,389  | 1,580               | 7,265 |
| VASTY2(3)               | -1,582 | ,787  | 4,039   | 1  | ,044 | ,206   | ,044                | ,962  |
| VASTY2(4)               | ,480   | ,431  | 1,242   | 1  | ,265 | 1,616  | ,695                | 3,759 |
| VASTY2(5)               | ,469   | ,441  | 1,130   | 1  | ,288 | 1,598  | ,673                | 3,791 |
| VASTY2(6)               | -1,559 | ,787  | 3,927   | 1  | ,048 | ,210   | ,045                | ,983  |
| VASTY2(7)               | ,587   | ,427  | 1,887   | 1  | ,170 | 1,799  | ,778                | 4,156 |
| VASTY2(8)               | ,277   | ,448  | ,382    | 1  | ,537 | 1,319  | ,548                | 3,171 |
| VASTY2(9)               | 1,117  | ,397  | 7,918   | 1  | ,005 | 3,057  | 1,404               | 6,656 |
| VASTY2(10)              | 1,480  | ,380  | 15,190  | 1  | ,000 | 4,392  | 2,087               | 9,243 |
| VASTY2(11)              | 1,145  | ,393  | 8,500   | 1  | ,004 | 3,142  | 1,455               | 6,784 |
| VASTY2(12)              | ,645   | ,419  | 2,366   | 1  | ,124 | 1,906  | ,838                | 4,334 |
| VASTY2(13)              | 1,489  | ,380  | 15,375  | 1  | ,000 | 4,433  | 2,106               | 9,331 |
| VASTY2(14)              | ,185   | ,456  | ,165    | 1  | ,684 | 1,204  | ,492                | 2,944 |
| VASTY2(15)              | -1,536 | ,785  | 3,824   | 1  | ,051 | ,215   | ,046                | 1,004 |
| VASTY2(16)              | -,402  | ,675  | ,354    | 1  | ,552 | ,669   | ,178                | 2,511 |
| VASTY2(17)              | -,254  | ,510  | ,248    | 1  | ,618 | ,776   | ,286                | 2,107 |
| VASTY2(18)              | -1,113 | ,671  | 2,747   | 1  | ,097 | ,329   | ,088                | 1,225 |
| VASTY2(19)              | -2,121 | 1,063 | 3,981   | 1  | ,046 | ,120   | ,015                | ,963  |
| VASTY2(20)              | ,475   | ,450  | 1,114   | 1  | ,291 | 1,608  | ,666                | 3,885 |
| VASTY2(21)              | -1,535 | ,785  | 3,819   | 1  | ,051 | ,215   | ,046                | 1,004 |
| VASTY2(22)              | -,805  | ,606  | 1,767   | 1  | ,184 | ,447   | ,136                | 1,465 |
| VASTY2(23)              | ,216   | ,456  | ,225    | 1  | ,636 | 1,241  | ,508                | 3,033 |
| VASTY2(24)              | -,874  | ,607  | 2,074   | 1  | ,150 | ,417   | ,127                | 1,371 |
| VASTY2(25)              | -1,284 | ,786  | 2,668   | 1  | ,102 | ,277   | ,059                | 1,292 |
| VASTY2(26)              | -2,007 | 1,057 | 3,605   | 1  | ,058 | ,134   | ,017                | 1,067 |
| VASTY2(27)              | -,851  | ,606  | 1,968   | 1  | ,161 | ,427   | ,130                | 1,402 |
| VASTY2(28)              | -,131  | ,565  | ,054    | 1  | ,816 | ,877   | ,290                | 2,653 |
| VASTY2(29)              | -,436  | ,533  | ,669    | 1  | ,413 | ,647   | ,228                | 1,837 |
| VASTY2(30)              | -,282  | ,510  | ,305    | 1  | ,580 | ,754   | ,278                | 2,049 |
| VASTY2(31)              | 1,263  | ,391  | 10,431  | 1  | ,001 | 3,536  | 1,643               | 7,611 |
| VASTY2(32)              | -,217  | ,513  | ,180    | 1  | ,672 | ,805   | ,295                | 2,198 |
| VASTY2(33)              | -,229  | ,511  | ,201    | 1  | ,654 | ,795   | ,292                | 2,167 |
| VASTY2(34)              | -1,121 | ,671  | 2,791   | 1  | ,095 | ,326   | ,088                | 1,214 |
| VASTY2(35)              | ,100   | ,482  | ,043    | 1  | ,835 | 1,106  | ,430                | 2,842 |
| Constant                | -3,667 | ,338  | 117,811 | 1  | ,000 | ,026   |                     |       |

a. Variable(s) entered on step 1: bv3, VASTY2.

```

LOGISTIC REGRESSION VARIABLES seurauslt3
/METHOD=ENTER sv3 VASTY2
/CONTRAST (sv3)=Indicator(1)
/CONTRAST (VASTY2)=Indicator(1)
/PRINT=CI(95)
/CRITERIA=PIN(0.05) POUT(0.10) ITERATE(20) CUT(0.5).

```

## Block 1: Method = Enter

### Omnibus Tests of Model Coefficients

|        |       | Chi-square | df | Sig. |
|--------|-------|------------|----|------|
| Step 1 | Step  | 296,871    | 37 | ,000 |
|        | Block | 296,871    | 37 | ,000 |
|        | Model | 296,871    | 37 | ,000 |

### Model Summary

| Step | -2 Log likelihood    | Cox & Snell R Square | Nagelkerke R Square |
|------|----------------------|----------------------|---------------------|
| 1    | 3242,18 <sup>a</sup> | ,024                 | ,095                |

a. Estimation terminated at iteration number 9 because parameter estimates changed by less than ,001.

### Classification Table<sup>a</sup>

|                    |                                                    | Predicted                         |
|--------------------|----------------------------------------------------|-----------------------------------|
|                    |                                                    | seorauslt3 seuraus highest = ...  |
| Observed           |                                                    | 0 ingen händelse eller ei haittaa |
| Step 1             | seorauslt3 seuraus highest = haitta (i någon form) | 12075                             |
|                    | 0 ingen händelse eller ei haittaa                  | 400                               |
|                    | 1 haitta (i någon form)                            |                                   |
| Overall Percentage |                                                    |                                   |



Classification Table<sup>a</sup>

| Observed           |                                                       | Predicted                                                    |                               |
|--------------------|-------------------------------------------------------|--------------------------------------------------------------|-------------------------------|
|                    |                                                       | seurauslt3<br>seuraus<br>highest = ...                       | 1 haitta (i<br>någon<br>form) |
| Step 1             | seurauslt3 seuraus highest = haitta (i<br>någon form) | 0 ingen händelse eller ei haittaa<br>1 haitta (i någon form) | 0<br>0                        |
| Overall Percentage |                                                       |                                                              |                               |

Classification Table<sup>a</sup>

| Observed           |                                                       | Predicted                                                    |             |
|--------------------|-------------------------------------------------------|--------------------------------------------------------------|-------------|
|                    |                                                       | Percentage<br>Correct                                        |             |
| Step 1             | seurauslt3 seuraus highest = haitta (i<br>någon form) | 0 ingen händelse eller ei haittaa<br>1 haitta (i någon form) | 100,0<br>,0 |
| Overall Percentage |                                                       |                                                              | 96,8        |

a. The cut value is ,500

**Variables in the Equation**

|                         | B      | S.E.  | Wald    | df | Sig. | Exp(B) | 95% C.I. for EXP(B) |       |
|-------------------------|--------|-------|---------|----|------|--------|---------------------|-------|
|                         |        |       |         |    |      |        | Lower               | Upper |
| Step 1 <sup>a</sup> sv3 |        |       | 1,026   | 2  | ,599 |        |                     |       |
| sv3(1)                  | -,128  | ,156  | ,675    | 1  | ,411 | ,880   | ,649                | 1,194 |
| sv3(2)                  | ,033   | ,148  | ,051    | 1  | ,822 | 1,034  | ,774                | 1,380 |
| VASTY2                  |        |       | 218,913 | 35 | ,000 |        |                     |       |
| VASTY2(1)               | ,591   | ,425  | 1,936   | 1  | ,164 | 1,806  | ,785                | 4,154 |
| VASTY2(2)               | 1,185  | ,395  | 9,009   | 1  | ,003 | 3,270  | 1,508               | 7,088 |
| VASTY2(3)               | -1,505 | ,786  | 3,673   | 1  | ,055 | ,222   | ,048                | 1,035 |
| VASTY2(4)               | ,548   | ,429  | 1,635   | 1  | ,201 | 1,731  | ,747                | 4,011 |
| VASTY2(5)               | ,535   | ,443  | 1,457   | 1  | ,227 | 1,708  | ,716                | 4,072 |
| VASTY2(6)               | -1,571 | ,790  | 3,952   | 1  | ,047 | ,208   | ,044                | ,978  |
| VASTY2(7)               | ,685   | ,420  | 2,670   | 1  | ,102 | 1,985  | ,872                | 4,516 |
| VASTY2(8)               | ,327   | ,448  | ,530    | 1  | ,467 | 1,386  | ,576                | 3,339 |
| VASTY2(9)               | 1,142  | ,396  | 8,306   | 1  | ,004 | 3,134  | 1,441               | 6,817 |
| VASTY2(10)              | 1,445  | ,388  | 13,885  | 1  | ,000 | 4,242  | 1,984               | 9,073 |
| VASTY2(11)              | 1,158  | ,392  | 8,699   | 1  | ,003 | 3,182  | 1,475               | 6,867 |
| VASTY2(12)              | ,615   | ,424  | 2,109   | 1  | ,146 | 1,851  | ,806                | 4,246 |
| VASTY2(13)              | 1,472  | ,388  | 14,394  | 1  | ,000 | 4,358  | 2,037               | 9,322 |
| VASTY2(14)              | ,177   | ,458  | ,149    | 1  | ,699 | 1,194  | ,486                | 2,930 |
| VASTY2(15)              | -1,566 | ,788  | 3,946   | 1  | ,047 | ,209   | ,045                | ,979  |
| VASTY2(16)              | -,376  | ,674  | ,311    | 1  | ,577 | ,687   | ,183                | 2,573 |
| VASTY2(17)              | -,225  | ,511  | ,194    | 1  | ,660 | ,799   | ,294                | 2,173 |
| VASTY2(18)              | -1,006 | ,679  | 2,193   | 1  | ,139 | ,366   | ,097                | 1,384 |
| VASTY2(19)              | -2,117 | 1,062 | 3,975   | 1  | ,046 | ,120   | ,015                | ,965  |
| VASTY2(20)              | ,482   | ,451  | 1,145   | 1  | ,285 | 1,619  | ,670                | 3,916 |
| VASTY2(21)              | -1,498 | ,786  | 3,636   | 1  | ,057 | ,224   | ,048                | 1,043 |
| VASTY2(22)              | -,824  | ,606  | 1,851   | 1  | ,174 | ,439   | ,134                | 1,438 |
| VASTY2(23)              | ,223   | ,456  | ,238    | 1  | ,625 | 1,249  | ,511                | 3,054 |
| VASTY2(24)              | -,846  | ,606  | 1,946   | 1  | ,163 | ,429   | ,131                | 1,409 |
| VASTY2(25)              | -1,260 | ,787  | 2,566   | 1  | ,109 | ,284   | ,061                | 1,325 |
| VASTY2(26)              | -1,993 | 1,057 | 3,555   | 1  | ,059 | ,136   | ,017                | 1,082 |
| VASTY2(27)              | -,859  | ,608  | 1,993   | 1  | ,158 | ,424   | ,129                | 1,396 |
| VASTY2(28)              | -,164  | ,573  | ,082    | 1  | ,774 | ,849   | ,276                | 2,606 |
| VASTY2(29)              | -,476  | ,542  | ,771    | 1  | ,380 | ,621   | ,215                | 1,796 |
| VASTY2(30)              | -,220  | ,511  | ,185    | 1  | ,667 | ,803   | ,295                | 2,185 |
| VASTY2(31)              | 1,352  | ,399  | 11,499  | 1  | ,001 | 3,863  | 1,769               | 8,437 |
| VASTY2(32)              | -,141  | ,521  | ,073    | 1  | ,787 | ,869   | ,313                | 2,410 |
| VASTY2(33)              | -,149  | ,521  | ,082    | 1  | ,774 | ,861   | ,310                | 2,389 |
| VASTY2(34)              | -1,106 | ,671  | 2,717   | 1  | ,099 | ,331   | ,089                | 1,233 |
| VASTY2(35)              | ,154   | ,479  | ,104    | 1  | ,747 | 1,167  | ,457                | 2,982 |
| Constant                | -3,652 | ,344  | 112,787 | 1  | ,000 | ,026   |                     |       |

a. Variable(s) entered on step 1: sv3, VASTY2.

```

LOGISTIC REGRESSION VARIABLES seurauslt3
/METHOD=ENTER sv5 VASTY2
/CONTRAST (sv5)=Indicator(1)
/CONTRAST (VASTY2)=Indicator(1)
/PRINT=CI(95)
/CRITERIA=PIN(0.05) POUT(0.10) ITERATE(20) CUT(0.5).

```

## Block 1: Method = Enter

### Omnibus Tests of Model Coefficients

|        |       | Chi-square | df | Sig. |
|--------|-------|------------|----|------|
| Step 1 | Step  | 298,546    | 39 | ,000 |
|        | Block | 298,546    | 39 | ,000 |
|        | Model | 298,546    | 39 | ,000 |

### Model Summary

| Step | -2 Log likelihood    | Cox & Snell R Square | Nagelkerke R Square |
|------|----------------------|----------------------|---------------------|
| 1    | 3240,50 <sup>a</sup> | ,024                 | ,096                |

a. Estimation terminated at iteration number 9 because parameter estimates changed by less than ,001.

### Classification Table<sup>a</sup>

|                    |                                                    | Predicted                         |
|--------------------|----------------------------------------------------|-----------------------------------|
|                    |                                                    | seorauslt3 seuraus highest = ...  |
| Observed           |                                                    | 0 ingen händelse eller ei haittaa |
| Step 1             | seorauslt3 seuraus highest = haitta (i någon form) | 12075                             |
|                    | 0 ingen händelse eller ei haittaa                  | 400                               |
|                    | 1 haitta (i någon form)                            |                                   |
| Overall Percentage |                                                    |                                   |

**Classification Table<sup>a</sup>**

| Observed           |                                                    | Predicted                         |                         |
|--------------------|----------------------------------------------------|-----------------------------------|-------------------------|
|                    |                                                    | seurauslt3 seuraus highest = ...  | 1 haitta (i någon form) |
| Step 1             | seurauslt3 seuraus highest = haitta (i någon form) | 0 ingen händelse eller ei haittaa | 0                       |
|                    |                                                    | 1 haitta (i någon form)           | 0                       |
| Overall Percentage |                                                    |                                   |                         |

**Classification Table<sup>a</sup>**

| Observed           |                                                    | Predicted                         |       |
|--------------------|----------------------------------------------------|-----------------------------------|-------|
|                    |                                                    | Percentage Correct                |       |
| Step 1             | seurauslt3 seuraus highest = haitta (i någon form) | 0 ingen händelse eller ei haittaa | 100,0 |
|                    |                                                    | 1 haitta (i någon form)           | ,0    |
| Overall Percentage |                                                    |                                   | 96,8  |

a. The cut value is ,500

**Variables in the Equation**

|                         | B      | S.E.  | Wald    | df | Sig. | Exp(B) | 95% C.I. for EXP(B) |       |
|-------------------------|--------|-------|---------|----|------|--------|---------------------|-------|
|                         |        |       |         |    |      |        | Lower               | Upper |
| Step 1 <sup>a</sup> sv5 |        |       | 2,683   | 4  | ,612 |        |                     |       |
| sv5(1)                  | ,002   | ,197  | ,000    | 1  | ,991 | 1,002  | ,681                | 1,475 |
| sv5(2)                  | -,114  | ,207  | ,305    | 1  | ,581 | ,892   | ,594                | 1,339 |
| sv5(3)                  | ,102   | ,181  | ,319    | 1  | ,572 | 1,108  | ,777                | 1,580 |
| sv5(4)                  | ,218   | ,193  | 1,276   | 1  | ,259 | 1,244  | ,852                | 1,816 |
| VASTY2                  |        |       | 215,380 | 35 | ,000 |        |                     |       |
| VASTY2(1)               | ,552   | ,425  | 1,687   | 1  | ,194 | 1,737  | ,755                | 3,995 |
| VASTY2(2)               | 1,104  | ,398  | 7,707   | 1  | ,006 | 3,017  | 1,384               | 6,579 |
| VASTY2(3)               | -1,501 | ,786  | 3,650   | 1  | ,056 | ,223   | ,048                | 1,040 |
| VASTY2(4)               | ,539   | ,429  | 1,579   | 1  | ,209 | 1,714  | ,740                | 3,974 |
| VASTY2(5)               | ,524   | ,444  | 1,395   | 1  | ,238 | 1,689  | ,708                | 4,033 |
| VASTY2(6)               | -1,685 | ,794  | 4,507   | 1  | ,034 | ,185   | ,039                | ,879  |
| VASTY2(7)               | ,675   | ,420  | 2,593   | 1  | ,107 | 1,965  | ,864                | 4,471 |
| VASTY2(8)               | ,346   | ,449  | ,593    | 1  | ,441 | 1,413  | ,586                | 3,409 |
| VASTY2(9)               | 1,136  | ,397  | 8,204   | 1  | ,004 | 3,113  | 1,431               | 6,772 |
| VASTY2(10)              | 1,351  | ,392  | 11,907  | 1  | ,001 | 3,863  | 1,793               | 8,323 |
| VASTY2(11)              | 1,141  | ,393  | 8,452   | 1  | ,004 | 3,131  | 1,450               | 6,757 |
| VASTY2(12)              | ,554   | ,425  | 1,701   | 1  | ,192 | 1,740  | ,757                | 4,000 |
| VASTY2(13)              | 1,373  | ,392  | 12,289  | 1  | ,000 | 3,949  | 1,832               | 8,511 |
| VASTY2(14)              | ,119   | ,460  | ,067    | 1  | ,796 | 1,126  | ,458                | 2,772 |
| VASTY2(15)              | -1,641 | ,789  | 4,323   | 1  | ,038 | ,194   | ,041                | ,910  |
| VASTY2(16)              | -,439  | ,675  | ,422    | 1  | ,516 | ,645   | ,172                | 2,422 |
| VASTY2(17)              | -,244  | ,511  | ,229    | 1  | ,633 | ,783   | ,288                | 2,132 |
| VASTY2(18)              | -1,084 | ,684  | 2,515   | 1  | ,113 | ,338   | ,089                | 1,292 |
| VASTY2(19)              | -2,200 | 1,065 | 4,262   | 1  | ,039 | ,111   | ,014                | ,895  |
| VASTY2(20)              | ,414   | ,453  | ,837    | 1  | ,360 | 1,513  | ,623                | 3,676 |
| VASTY2(21)              | -1,514 | ,786  | 3,711   | 1  | ,054 | ,220   | ,047                | 1,027 |
| VASTY2(22)              | -,831  | ,606  | 1,883   | 1  | ,170 | ,436   | ,133                | 1,427 |
| VASTY2(23)              | ,212   | ,456  | ,217    | 1  | ,642 | 1,237  | ,506                | 3,024 |
| VASTY2(24)              | -,880  | ,607  | 2,103   | 1  | ,147 | ,415   | ,126                | 1,362 |
| VASTY2(25)              | -1,260 | ,787  | 2,563   | 1  | ,109 | ,284   | ,061                | 1,327 |
| VASTY2(26)              | -2,018 | 1,057 | 3,643   | 1  | ,056 | ,133   | ,017                | 1,056 |
| VASTY2(27)              | -,929  | ,610  | 2,324   | 1  | ,127 | ,395   | ,120                | 1,304 |
| VASTY2(28)              | -,294  | ,580  | ,257    | 1  | ,612 | ,745   | ,239                | 2,321 |
| VASTY2(29)              | -,611  | ,550  | 1,234   | 1  | ,267 | ,543   | ,185                | 1,595 |
| VASTY2(30)              | -,220  | ,511  | ,184    | 1  | ,668 | ,803   | ,295                | 2,187 |
| VASTY2(31)              | 1,292  | ,403  | 10,262  | 1  | ,001 | 3,639  | 1,651               | 8,020 |
| VASTY2(32)              | -,220  | ,526  | ,174    | 1  | ,676 | ,803   | ,286                | 2,253 |
| VASTY2(33)              | -,232  | ,527  | ,193    | 1  | ,661 | ,793   | ,282                | 2,230 |
| VASTY2(34)              | -1,114 | ,671  | 2,757   | 1  | ,097 | ,328   | ,088                | 1,223 |
| VASTY2(35)              | ,112   | ,479  | ,055    | 1  | ,815 | 1,118  | ,437                | 2,860 |
| Constant                | -3,700 | ,357  | 107,608 | 1  | ,000 | ,025   |                     |       |

a. Variable(s) entered on step 1: sv5, VASTY2.

```
LOGISTIC REGRESSION VARIABLES seurauslt3
/METHOD=ENTER sv7 VASTY2
/CONTRAST (sv7)=Indicator(1)
/CONTRAST (VASTY2)=Indicator(1)
/PRINT=CI(95)
/CRITERIA=PIN(0.05) POUT(0.10) ITERATE(20) CUT(0.5).
```

### Block 1: Method = Enter

#### Omnibus Tests of Model Coefficients

|        |       | Chi-square | df | Sig. |
|--------|-------|------------|----|------|
| Step 1 | Step  | 299,651    | 41 | ,000 |
|        | Block | 299,651    | 41 | ,000 |
|        | Model | 299,651    | 41 | ,000 |

#### Model Summary

| Step | -2 Log likelihood    | Cox & Snell R Square | Nagelkerke R Square |
|------|----------------------|----------------------|---------------------|
| 1    | 3239,40 <sup>a</sup> | ,024                 | ,096                |

a. Estimation terminated at iteration number 9 because parameter estimates changed by less than ,001.

#### Classification Table<sup>a</sup>

|          |                                                    | Predicted                                                    |
|----------|----------------------------------------------------|--------------------------------------------------------------|
|          |                                                    | seorauslt3<br>seoraus<br>highest = ..                        |
| Observed |                                                    | 0 ingen<br>händelse<br>eller ei<br>haittaa                   |
| Step 1   | seorauslt3 seuraus highest = haitta (i någon form) | 0 ingen händelse eller ei haittaa<br>1 haitta (i någon form) |
|          | Overall Percentage                                 | 12075<br>400                                                 |

**Classification Table<sup>a</sup>**

| Observed           |                                                       | Predicted                                                    |                               |
|--------------------|-------------------------------------------------------|--------------------------------------------------------------|-------------------------------|
|                    |                                                       | seurauslt3<br>seuraus<br>highest = ...                       | 1 haitta (i<br>någon<br>form) |
| Step 1             | seurauslt3 seuraus highest = haitta (i<br>någon form) | 0 ingen händelse eller ei haittaa<br>1 haitta (i någon form) | 0<br>0                        |
| Overall Percentage |                                                       |                                                              |                               |

**Classification Table<sup>a</sup>**

| Observed           |                                                       | Predicted                                                    |             |
|--------------------|-------------------------------------------------------|--------------------------------------------------------------|-------------|
|                    |                                                       | Percentage<br>Correct                                        |             |
| Step 1             | seurauslt3 seuraus highest = haitta (i<br>någon form) | 0 ingen händelse eller ei haittaa<br>1 haitta (i någon form) | 100,0<br>,0 |
| Overall Percentage |                                                       |                                                              | 96,8        |

a. The cut value is ,500

**Variables in the Equation**

|                         | B      | S.E.  | Wald    | df | Sig. | Exp(B) | 95% C.I. for EXP(B) |       |
|-------------------------|--------|-------|---------|----|------|--------|---------------------|-------|
|                         |        |       |         |    |      |        | Lower               | Upper |
| Step 1 <sup>a</sup> sv7 |        |       | 3,796   | 6  | ,704 |        |                     |       |
| sv7(1)                  | -,122  | ,221  | ,304    | 1  | ,581 | ,885   | ,575                | 1,365 |
| sv7(2)                  | -,210  | ,243  | ,746    | 1  | ,388 | ,810   | ,503                | 1,306 |
| sv7(3)                  | -,007  | ,228  | ,001    | 1  | ,975 | ,993   | ,635                | 1,553 |
| sv7(4)                  | ,145   | ,209  | ,481    | 1  | ,488 | 1,156  | ,768                | 1,741 |
| sv7(5)                  | -,028  | ,201  | ,020    | 1  | ,889 | ,972   | ,655                | 1,442 |
| sv7(6)                  | ,174   | ,219  | ,633    | 1  | ,426 | 1,190  | ,775                | 1,829 |
| VASTY2                  |        |       | 218,650 | 35 | ,000 |        |                     |       |
| VASTY2(1)               | ,598   | ,425  | 1,974   | 1  | ,160 | 1,818  | ,790                | 4,184 |
| VASTY2(2)               | 1,156  | ,398  | 8,426   | 1  | ,004 | 3,179  | 1,456               | 6,940 |
| VASTY2(3)               | -1,493 | ,786  | 3,609   | 1  | ,057 | ,225   | ,048                | 1,049 |
| VASTY2(4)               | ,571   | ,429  | 1,766   | 1  | ,184 | 1,769  | ,763                | 4,104 |
| VASTY2(5)               | ,551   | ,444  | 1,539   | 1  | ,215 | 1,734  | ,727                | 4,140 |
| VASTY2(6)               | -1,653 | ,797  | 4,307   | 1  | ,038 | ,191   | ,040                | ,912  |
| VASTY2(7)               | ,680   | ,420  | 2,625   | 1  | ,105 | 1,973  | ,867                | 4,490 |
| VASTY2(8)               | ,342   | ,449  | ,578    | 1  | ,447 | 1,407  | ,583                | 3,396 |
| VASTY2(9)               | 1,153  | ,397  | 8,446   | 1  | ,004 | 3,167  | 1,455               | 6,891 |
| VASTY2(10)              | 1,408  | ,393  | 12,857  | 1  | ,000 | 4,087  | 1,893               | 8,824 |
| VASTY2(11)              | 1,169  | ,393  | 8,848   | 1  | ,003 | 3,220  | 1,490               | 6,958 |
| VASTY2(12)              | ,599   | ,424  | 1,993   | 1  | ,158 | 1,820  | ,793                | 4,181 |
| VASTY2(13)              | 1,428  | ,393  | 13,212  | 1  | ,000 | 4,170  | 1,931               | 9,006 |
| VASTY2(14)              | ,162   | ,460  | ,124    | 1  | ,724 | 1,176  | ,478                | 2,895 |
| VASTY2(15)              | -1,594 | ,790  | 4,072   | 1  | ,044 | ,203   | ,043                | ,955  |
| VASTY2(16)              | -,401  | ,676  | ,352    | 1  | ,553 | ,670   | ,178                | 2,517 |
| VASTY2(17)              | -,208  | ,511  | ,166    | 1  | ,684 | ,812   | ,298                | 2,212 |
| VASTY2(18)              | -,988  | ,687  | 2,069   | 1  | ,150 | ,372   | ,097                | 1,431 |
| VASTY2(19)              | -2,101 | 1,068 | 3,865   | 1  | ,049 | ,122   | ,015                | ,993  |
| VASTY2(20)              | ,452   | ,454  | ,992    | 1  | ,319 | 1,571  | ,646                | 3,823 |
| VASTY2(21)              | -1,492 | ,786  | 3,607   | 1  | ,058 | ,225   | ,048                | 1,049 |
| VASTY2(22)              | -,822  | ,606  | 1,841   | 1  | ,175 | ,440   | ,134                | 1,441 |
| VASTY2(23)              | ,233   | ,456  | ,262    | 1  | ,609 | 1,263  | ,516                | 3,089 |
| VASTY2(24)              | -,857  | ,607  | 1,996   | 1  | ,158 | ,424   | ,129                | 1,394 |
| VASTY2(25)              | -1,242 | ,787  | 2,490   | 1  | ,115 | ,289   | ,062                | 1,351 |
| VASTY2(26)              | -2,000 | 1,057 | 3,580   | 1  | ,058 | ,135   | ,017                | 1,074 |
| VASTY2(27)              | -,885  | ,611  | 2,100   | 1  | ,147 | ,413   | ,125                | 1,366 |
| VASTY2(28)              | -,270  | ,585  | ,213    | 1  | ,644 | ,763   | ,242                | 2,404 |
| VASTY2(29)              | -,588  | ,556  | 1,116   | 1  | ,291 | ,556   | ,187                | 1,653 |
| VASTY2(30)              | -,202  | ,511  | ,155    | 1  | ,693 | ,817   | ,300                | 2,227 |
| VASTY2(31)              | 1,376  | ,405  | 11,558  | 1  | ,001 | 3,957  | 1,791               | 8,747 |
| VASTY2(32)              | -,123  | ,531  | ,054    | 1  | ,817 | ,884   | ,312                | 2,503 |
| VASTY2(33)              | -,133  | ,533  | ,062    | 1  | ,804 | ,876   | ,308                | 2,492 |
| VASTY2(34)              | -1,103 | ,671  | 2,701   | 1  | ,100 | ,332   | ,089                | 1,237 |



**Variables in the Equation**

|            | B      | S.E. | Wald    | df | Sig. | Exp(B) | 95% C.I. for EXP(B) |       |
|------------|--------|------|---------|----|------|--------|---------------------|-------|
|            |        |      |         |    |      |        | Lower               | Upper |
| VASTY2(35) | ,154   | ,479 | ,104    | 1  | ,747 | 1,167  | ,456                | 2,987 |
| Constant   | -3,675 | ,363 | 102,427 | 1  | ,000 | ,025   |                     |       |

a. Variable(s) entered on step 1: sv7, VASTY2.

\*\*

```
LOGISTIC REGRESSION VARIABLES handlt1
/METHOD=ENTER bv1 VASTY2
/CONTRAST (bv1)=Indicator(1)
/CONTRAST (VASTY2)=Indicator(1)
/PRINT=CI(95)
/CRITERIA=PIN(0.05) POUT(0.10) ITERATE(20) CUT(0.5).
```

**Block 1: Method = Enter**

**Omnibus Tests of Model Coefficients**

|        |       | Chi-square | df | Sig. |
|--------|-------|------------|----|------|
| Step 1 | Step  | 220,073    | 37 | ,000 |
|        | Block | 220,073    | 37 | ,000 |
|        | Model | 220,073    | 37 | ,000 |

**Model Summary**

| Step | -2 Log likelihood    | Cox & Snell R Square | Nagelkerke R Square |
|------|----------------------|----------------------|---------------------|
| 1    | 2198,71 <sup>a</sup> | ,017                 | ,099                |

a. Estimation terminated at iteration number 20 because maximum iterations has been reached. Final solution cannot be found.

**Classification Table<sup>a</sup>**

| Observed           |                                | Predicted                      |                      |   |
|--------------------|--------------------------------|--------------------------------|----------------------|---|
|                    |                                | handlt1 händelse larger than 1 |                      |   |
|                    |                                | 0 ingen eller en händelse      | 1 mer än en händelse |   |
| Step 1             | handlt1 händelse larger than 1 | 0 ingen eller en händelse      | 12229                | 0 |
|                    |                                | 1 mer än en händelse           | 246                  | 0 |
| Overall Percentage |                                |                                |                      |   |

**Classification Table<sup>a</sup>**

| Observed           |                                | Predicted          |
|--------------------|--------------------------------|--------------------|
|                    |                                | Percentage Correct |
| Step 1             | handlt1 händelse larger than 1 | 100,0              |
|                    |                                | ,0                 |
| Overall Percentage |                                | 98,0               |

a. The cut value is ,500

**Variables in the Equation**

|                     | B       | S.E.     | Wald    | df | Sig. | Exp(B) | 95% C.I. |
|---------------------|---------|----------|---------|----|------|--------|----------|
|                     |         |          |         |    |      |        | Lower    |
| Step 1 <sup>a</sup> |         |          |         |    |      |        |          |
| bv1                 |         |          | 10,930  | 2  | ,004 |        |          |
| bv1(1)              | -,349   | ,189     | 3,402   | 1  | ,065 | ,706   | ,487     |
| bv1(2)              | ,302    | ,152     | 3,935   | 1  | ,047 | 1,352  | 1,004    |
| VASTY2              |         |          | 120,570 | 35 | ,000 |        |          |
| VASTY2(1)           | ,467    | ,575     | ,658    | 1  | ,417 | 1,595  | ,516     |
| VASTY2(2)           | ,739    | ,545     | 1,837   | 1  | ,175 | 2,094  | ,719     |
| VASTY2(3)           | -1,847  | 1,101    | 2,816   | 1  | ,093 | ,158   | ,018     |
| VASTY2(4)           | ,299    | ,578     | ,267    | 1  | ,605 | 1,348  | ,434     |
| VASTY2(5)           | -,501   | ,735     | ,464    | 1  | ,496 | ,606   | ,143     |
| VASTY2(6)           | -17,067 | 2099,887 | ,000    | 1  | ,994 | ,000   | ,000     |
| VASTY2(7)           | ,661    | ,545     | 1,471   | 1  | ,225 | 1,936  | ,666     |
| VASTY2(8)           | ,228    | ,591     | ,149    | 1  | ,699 | 1,257  | ,394     |
| VASTY2(9)           | ,126    | ,612     | ,042    | 1  | ,837 | 1,134  | ,342     |
| VASTY2(10)          | 1,478   | ,500     | 8,729   | 1  | ,003 | 4,384  | 1,645    |
| VASTY2(11)          | 1,431   | ,504     | 8,054   | 1  | ,005 | 4,182  | 1,557    |
| VASTY2(12)          | -,618   | ,735     | ,708    | 1  | ,400 | ,539   | ,128     |
| VASTY2(13)          | -,205   | ,640     | ,102    | 1  | ,749 | ,815   | ,232     |
| VASTY2(14)          | ,065    | ,612     | ,011    | 1  | ,915 | 1,068  | ,322     |
| VASTY2(15)          | ,103    | ,611     | ,028    | 1  | ,866 | 1,108  | ,335     |

Variables in the Equation

|                     |            | 95% C.I... |
|---------------------|------------|------------|
|                     |            | Upper      |
| Step 1 <sup>a</sup> | bv1        |            |
|                     | bv1(1)     | 1,022      |
|                     | bv1(2)     | 1,822      |
|                     | VASTY2     |            |
|                     | VASTY2(1)  | 4,926      |
|                     | VASTY2(2)  | 6,094      |
|                     | VASTY2(3)  | 1,364      |
|                     | VASTY2(4)  | 4,189      |
|                     | VASTY2(5)  | 2,561      |
|                     | VASTY2(6)  | .          |
|                     | VASTY2(7)  | 5,633      |
|                     | VASTY2(8)  | 4,006      |
|                     | VASTY2(9)  | 3,765      |
|                     | VASTY2(10) | 11,685     |
|                     | VASTY2(11) | 11,233     |
|                     | VASTY2(12) | 2,275      |
|                     | VASTY2(13) | 2,858      |
|                     | VASTY2(14) | 3,543      |
|                     | VASTY2(15) | 3,670      |

**Variables in the Equation**

|            | B       | S.E.     | Wald   | df | Sig. | Exp(B) | 95% C.I. |
|------------|---------|----------|--------|----|------|--------|----------|
|            |         |          |        |    |      |        | Lower    |
| VASTY2(16) | ,164    | ,738     | ,050   | 1  | ,824 | 1,179  | ,278     |
| VASTY2(17) | -16,898 | 2096,665 | ,000   | 1  | ,994 | ,000   | ,000     |
| VASTY2(18) | -16,941 | 2104,491 | ,000   | 1  | ,994 | ,000   | ,000     |
| VASTY2(19) | -1,349  | 1,105    | 1,490  | 1  | ,222 | ,260   | ,030     |
| VASTY2(20) | -,442   | ,737     | ,359   | 1  | ,549 | ,643   | ,152     |
| VASTY2(21) | -,582   | ,735     | ,629   | 1  | ,428 | ,559   | ,132     |
| VASTY2(22) | ,725    | ,565     | 1,647  | 1  | ,199 | 2,064  | ,683     |
| VASTY2(23) | 1,650   | ,498     | 10,989 | 1  | ,001 | 5,208  | 1,963    |
| VASTY2(24) | 1,197   | ,512     | 5,478  | 1  | ,019 | 3,311  | 1,215    |
| VASTY2(25) | ,586    | ,591     | ,984   | 1  | ,321 | 1,798  | ,564     |
| VASTY2(26) | -,096   | ,677     | ,020   | 1  | ,888 | ,909   | ,241     |
| VASTY2(27) | -1,757  | 1,099    | 2,555  | 1  | ,110 | ,173   | ,020     |
| VASTY2(28) | -1,293  | 1,100    | 1,382  | 1  | ,240 | ,274   | ,032     |
| VASTY2(29) | -17,003 | 2095,464 | ,000   | 1  | ,994 | ,000   | ,000     |
| VASTY2(30) | ,402    | ,576     | ,487   | 1  | ,485 | 1,495  | ,484     |
| VASTY2(31) | 1,084   | ,524     | 4,279  | 1  | ,039 | 2,958  | 1,059    |
| VASTY2(32) | ,050    | ,639     | ,006   | 1  | ,938 | 1,051  | ,301     |
| VASTY2(33) | -,206   | ,676     | ,093   | 1  | ,760 | ,814   | ,216     |
| VASTY2(34) | -1,664  | 1,098    | 2,295  | 1  | ,130 | ,189   | ,022     |
| VASTY2(35) | ,954    | ,537     | 3,156  | 1  | ,076 | 2,596  | ,906     |
| Constant   | -4,232  | ,454     | 86,955 | 1  | ,000 | ,015   |          |

**Variables in the Equation**

|            | 95% C.I... |
|------------|------------|
|            | Upper      |
| VASTY2(16) | 5,003      |
| VASTY2(17) | .          |
| VASTY2(18) | .          |
| VASTY2(19) | 2,263      |
| VASTY2(20) | 2,725      |
| VASTY2(21) | 2,357      |
| VASTY2(22) | 6,240      |
| VASTY2(23) | 13,818     |
| VASTY2(24) | 9,024      |
| VASTY2(25) | 5,726      |
| VASTY2(26) | 3,425      |
| VASTY2(27) | 1,488      |
| VASTY2(28) | 2,370      |
| VASTY2(29) | .          |
| VASTY2(30) | 4,618      |
| VASTY2(31) | 8,264      |
| VASTY2(32) | 3,675      |
| VASTY2(33) | 3,060      |
| VASTY2(34) | 1,630      |
| VASTY2(35) | 7,438      |
| Constant   |            |

a. Variable(s) entered on step 1: bv1, VASTY2.

```
LOGISTIC REGRESSION VARIABLES handlt1
/METHOD=ENTER bv2 VASTY2
/CONTRAST (bv2)=Indicator(1)
/CONTRAST (VASTY2)=Indicator(1)
/PRINT=CI(95)
/CRITERIA=PIN(0.05) POUT(0.10) ITERATE(20) CUT(0.5).
```

**Block 1: Method = Enter**

**Omnibus Tests of Model Coefficients**

|        |       | Chi-square | df | Sig. |
|--------|-------|------------|----|------|
| Step 1 | Step  | 217,446    | 37 | ,000 |
|        | Block | 217,446    | 37 | ,000 |
|        | Model | 217,446    | 37 | ,000 |

### Model Summary

| Step | -2 Log likelihood    | Cox & Snell R Square | Nagelkerke R Square |
|------|----------------------|----------------------|---------------------|
| 1    | 2201,34 <sup>a</sup> | ,017                 | ,098                |

a. Estimation terminated at iteration number 20 because maximum iterations has been reached. Final solution cannot be found.

Classification Table<sup>a</sup>

| Observed           |                                | Predicted                      |                           |
|--------------------|--------------------------------|--------------------------------|---------------------------|
|                    |                                | handlt1 händelse larger than 1 | 0 ingen eller en händelse |
| Step 1             | handlt1 händelse larger than 1 | 0 ingen eller en händelse      | 12229                     |
|                    |                                | 1 mer än en händelse           | 246                       |
| Overall Percentage |                                |                                |                           |

Classification Table<sup>a</sup>

| Observed           |                                | Predicted          |
|--------------------|--------------------------------|--------------------|
|                    |                                | Percentage Correct |
| Step 1             | handlt1 händelse larger than 1 | 100,0              |
|                    |                                | ,0                 |
| Overall Percentage |                                | 98,0               |

a. The cut value is ,500

**Variables in the Equation**

|                         | B       | S.E.     | Wald    | df | Sig. | Exp(B) | 95% C.I. |
|-------------------------|---------|----------|---------|----|------|--------|----------|
|                         |         |          |         |    |      |        | Lower    |
| Step 1 <sup>a</sup> bv2 |         |          | 8,427   | 2  | ,015 |        |          |
| bv2(1)                  | -,248   | ,188     | 1,736   | 1  | ,188 | ,780   | ,539     |
| bv2(2)                  | ,231    | ,170     | 1,847   | 1  | ,174 | 1,260  | ,903     |
| VASTY2                  |         |          | 120,796 | 35 | ,000 |        |          |
| VASTY2(1)               | ,455    | ,575     | ,627    | 1  | ,429 | 1,577  | ,511     |
| VASTY2(2)               | ,741    | ,545     | 1,845   | 1  | ,174 | 2,097  | ,720     |
| VASTY2(3)               | -1,802  | 1,100    | 2,684   | 1  | ,101 | ,165   | ,019     |
| VASTY2(4)               | ,330    | ,578     | ,327    | 1  | ,567 | 1,391  | ,449     |
| VASTY2(5)               | -,493   | ,735     | ,450    | 1  | ,502 | ,611   | ,145     |
| VASTY2(6)               | -17,032 | 2101,796 | ,000    | 1  | ,994 | ,000   | ,000     |
| VASTY2(7)               | ,708    | ,543     | 1,701   | 1  | ,192 | 2,030  | ,701     |
| VASTY2(8)               | ,231    | ,592     | ,153    | 1  | ,696 | 1,260  | ,395     |
| VASTY2(9)               | ,136    | ,612     | ,050    | 1  | ,824 | 1,146  | ,345     |
| VASTY2(10)              | 1,486   | ,500     | 8,827   | 1  | ,003 | 4,421  | 1,658    |
| VASTY2(11)              | 1,443   | ,504     | 8,206   | 1  | ,004 | 4,234  | 1,577    |
| VASTY2(12)              | -,610   | ,735     | ,689    | 1  | ,406 | ,543   | ,129     |
| VASTY2(13)              | -,185   | ,640     | ,084    | 1  | ,772 | ,831   | ,237     |
| VASTY2(14)              | ,079    | ,612     | ,017    | 1  | ,898 | 1,082  | ,326     |
| VASTY2(15)              | ,098    | ,611     | ,026    | 1  | ,872 | 1,103  | ,333     |
| VASTY2(16)              | ,182    | ,737     | ,061    | 1  | ,805 | 1,199  | ,283     |
| VASTY2(17)              | -16,892 | 2098,459 | ,000    | 1  | ,994 | ,000   | ,000     |
| VASTY2(18)              | -16,938 | 2106,705 | ,000    | 1  | ,994 | ,000   | ,000     |
| VASTY2(19)              | -1,413  | 1,102    | 1,644   | 1  | ,200 | ,243   | ,028     |
| VASTY2(20)              | -,412   | ,736     | ,313    | 1  | ,576 | ,662   | ,157     |
| VASTY2(21)              | -,575   | ,735     | ,614    | 1  | ,433 | ,562   | ,133     |
| VASTY2(22)              | ,730    | ,565     | 1,667   | 1  | ,197 | 2,074  | ,685     |
| VASTY2(23)              | 1,641   | ,498     | 10,875  | 1  | ,001 | 5,161  | 1,946    |
| VASTY2(24)              | 1,230   | ,511     | 5,786   | 1  | ,016 | 3,420  | 1,256    |
| VASTY2(25)              | ,594    | ,591     | 1,011   | 1  | ,315 | 1,812  | ,569     |
| VASTY2(26)              | -,088   | ,677     | ,017    | 1  | ,897 | ,916   | ,243     |
| VASTY2(27)              | -1,742  | 1,099    | 2,512   | 1  | ,113 | ,175   | ,020     |
| VASTY2(28)              | -1,289  | 1,100    | 1,372   | 1  | ,241 | ,276   | ,032     |
| VASTY2(29)              | -16,985 | 2096,165 | ,000    | 1  | ,994 | ,000   | ,000     |
| VASTY2(30)              | ,418    | ,576     | ,526    | 1  | ,468 | 1,518  | ,491     |
| VASTY2(31)              | 1,095   | ,523     | 4,379   | 1  | ,036 | 2,989  | 1,072    |
| VASTY2(32)              | ,045    | ,638     | ,005    | 1  | ,944 | 1,046  | ,300     |
| VASTY2(33)              | -,206   | ,676     | ,093    | 1  | ,760 | ,813   | ,216     |
| VASTY2(34)              | -1,654  | 1,098    | 2,268   | 1  | ,132 | ,191   | ,022     |
| VASTY2(35)              | ,998    | ,535     | 3,475   | 1  | ,062 | 2,713  | ,950     |
| Constant                | -4,243  | ,463     | 84,086  | 1  | ,000 | ,014   |          |

Variables in the Equation

|                     |            | 95% C.I... |
|---------------------|------------|------------|
|                     |            | Upper      |
| Step 1 <sup>a</sup> | bv2        |            |
|                     | bv2(1)     | 1,129      |
|                     | bv2(2)     | 1,759      |
|                     | VASTY2     |            |
|                     | VASTY2(1)  | 4,870      |
|                     | VASTY2(2)  | 6,105      |
|                     | VASTY2(3)  | 1,425      |
|                     | VASTY2(4)  | 4,316      |
|                     | VASTY2(5)  | 2,579      |
|                     | VASTY2(6)  | .          |
|                     | VASTY2(7)  | 5,880      |
|                     | VASTY2(8)  | 4,019      |
|                     | VASTY2(9)  | 3,803      |
|                     | VASTY2(10) | 11,786     |
|                     | VASTY2(11) | 11,365     |
|                     | VASTY2(12) | 2,294      |
|                     | VASTY2(13) | 2,913      |
|                     | VASTY2(14) | 3,587      |
|                     | VASTY2(15) | 3,654      |
|                     | VASTY2(16) | 5,084      |
|                     | VASTY2(17) | .          |
|                     | VASTY2(18) | .          |
|                     | VASTY2(19) | 2,110      |
|                     | VASTY2(20) | 2,803      |
|                     | VASTY2(21) | 2,374      |
|                     | VASTY2(22) | 6,278      |
|                     | VASTY2(23) | 13,690     |
|                     | VASTY2(24) | 9,316      |
|                     | VASTY2(25) | 5,771      |
|                     | VASTY2(26) | 3,451      |
|                     | VASTY2(27) | 1,510      |
|                     | VASTY2(28) | 2,381      |
|                     | VASTY2(29) | .          |
|                     | VASTY2(30) | 4,691      |
|                     | VASTY2(31) | 8,336      |
|                     | VASTY2(32) | 3,652      |
|                     | VASTY2(33) | 3,057      |
|                     | VASTY2(34) | 1,646      |
|                     | VASTY2(35) | 7,745      |
|                     | Constant   |            |

a. Variable(s) entered on step 1: bv2, VASTY2.



## Block 1: Method = Enter

### Omnibus Tests of Model Coefficients

|        |       | Chi-square | df | Sig. |
|--------|-------|------------|----|------|
| Step 1 | Step  | 212,717    | 37 | ,000 |
|        | Block | 212,717    | 37 | ,000 |
|        | Model | 212,717    | 37 | ,000 |

### Model Summary

| Step | -2 Log likelihood    | Cox & Snell R Square | Nagelkerke R Square |
|------|----------------------|----------------------|---------------------|
| 1    | 2206,07 <sup>a</sup> | ,017                 | ,096                |

a. Estimation terminated at iteration number 20 because maximum iterations has been reached. Final solution cannot be found.

### Classification Table<sup>a</sup>

|                    |                                |                           | Predicted                      |                      |
|--------------------|--------------------------------|---------------------------|--------------------------------|----------------------|
|                    |                                |                           | handlt1 händelse larger than 1 |                      |
| Observed           |                                |                           | 0 ingen eller en händelse      | 1 mer än en händelse |
| Step 1             | handlt1 händelse larger than 1 | 0 ingen eller en händelse | 12229                          | 0                    |
|                    |                                | 1 mer än en händelse      | 246                            | 0                    |
| Overall Percentage |                                |                           |                                |                      |

### Classification Table<sup>a</sup>

|                    |                                |                           | Predicted          |
|--------------------|--------------------------------|---------------------------|--------------------|
|                    |                                |                           | Percentage Correct |
| Step 1             | handlt1 händelse larger than 1 | 0 ingen eller en händelse | 100,0              |
|                    |                                | 1 mer än en händelse      | ,0                 |
| Overall Percentage |                                |                           | 98,0               |

a. The cut value is ,500

**Variables in the Equation**

|                         | B       | S.E.     | Wald    | df | Sig. | Exp(B) | 95% C.I. |
|-------------------------|---------|----------|---------|----|------|--------|----------|
|                         |         |          |         |    |      |        | Lower    |
| Step 1 <sup>a</sup> bv3 |         |          | 3,508   | 2  | ,173 |        |          |
| bv3(1)                  | -,484   | ,259     | 3,492   | 1  | ,062 | ,616   | ,371     |
| bv3(2)                  | -,018   | ,194     | ,009    | 1  | ,926 | ,982   | ,672     |
| VASTY2                  |         |          | 118,219 | 35 | ,000 |        |          |
| VASTY2(1)               | ,522    | ,575     | ,825    | 1  | ,364 | 1,686  | ,546     |
| VASTY2(2)               | ,795    | ,545     | 2,131   | 1  | ,144 | 2,214  | ,762     |
| VASTY2(3)               | -1,646  | 1,100    | 2,238   | 1  | ,135 | ,193   | ,022     |
| VASTY2(4)               | ,461    | ,578     | ,637    | 1  | ,425 | 1,585  | ,511     |
| VASTY2(5)               | -,412   | ,735     | ,314    | 1  | ,575 | ,663   | ,157     |
| VASTY2(6)               | -16,921 | 2104,931 | ,000    | 1  | ,994 | ,000   | ,000     |
| VASTY2(7)               | ,894    | ,548     | 2,666   | 1  | ,103 | 2,445  | ,836     |
| VASTY2(8)               | ,329    | ,591     | ,310    | 1  | ,578 | 1,389  | ,437     |
| VASTY2(9)               | ,249    | ,611     | ,166    | 1  | ,684 | 1,283  | ,387     |
| VASTY2(10)              | 1,554   | ,499     | 9,677   | 1  | ,002 | 4,728  | 1,777    |
| VASTY2(11)              | 1,499   | ,504     | 8,860   | 1  | ,003 | 4,479  | 1,669    |
| VASTY2(12)              | -,535   | ,734     | ,531    | 1  | ,466 | ,586   | ,139     |
| VASTY2(13)              | -,027   | ,638     | ,002    | 1  | ,966 | ,973   | ,279     |
| VASTY2(14)              | ,182    | ,611     | ,089    | 1  | ,766 | 1,200  | ,362     |
| VASTY2(15)              | ,179    | ,610     | ,086    | 1  | ,770 | 1,196  | ,362     |
| VASTY2(16)              | ,265    | ,738     | ,129    | 1  | ,720 | 1,303  | ,306     |
| VASTY2(17)              | -16,892 | 2100,571 | ,000    | 1  | ,994 | ,000   | ,000     |
| VASTY2(18)              | -16,886 | 2109,059 | ,000    | 1  | ,994 | ,000   | ,000     |
| VASTY2(19)              | -1,345  | 1,107    | 1,477   | 1  | ,224 | ,261   | ,030     |
| VASTY2(20)              | -,297   | ,736     | ,162    | 1  | ,687 | ,743   | ,176     |
| VASTY2(21)              | -,520   | ,734     | ,501    | 1  | ,479 | ,595   | ,141     |
| VASTY2(22)              | ,645    | ,563     | 1,311   | 1  | ,252 | 1,906  | ,632     |
| VASTY2(23)              | 1,655   | ,498     | 11,062  | 1  | ,001 | 5,235  | 1,974    |
| VASTY2(24)              | 1,350   | ,511     | 6,982   | 1  | ,008 | 3,856  | 1,417    |
| VASTY2(25)              | ,615    | ,591     | 1,083   | 1  | ,298 | 1,850  | ,581     |
| VASTY2(26)              | ,016    | ,676     | ,001    | 1  | ,981 | 1,016  | ,270     |
| VASTY2(27)              | -1,612  | 1,099    | 2,154   | 1  | ,142 | ,199   | ,023     |
| VASTY2(28)              | -1,165  | 1,099    | 1,124   | 1  | ,289 | ,312   | ,036     |
| VASTY2(29)              | -16,951 | 2100,489 | ,000    | 1  | ,994 | ,000   | ,000     |
| VASTY2(30)              | ,453    | ,575     | ,621    | 1  | ,431 | 1,574  | ,510     |
| VASTY2(31)              | 1,211   | ,526     | 5,307   | 1  | ,021 | 3,356  | 1,198    |
| VASTY2(32)              | ,137    | ,640     | ,046    | 1  | ,831 | 1,147  | ,327     |
| VASTY2(33)              | -,125   | ,677     | ,034    | 1  | ,853 | ,882   | ,234     |
| VASTY2(34)              | -1,622  | 1,098    | 2,183   | 1  | ,140 | ,197   | ,023     |
| VASTY2(35)              | 1,141   | ,537     | 4,512   | 1  | ,034 | 3,131  | 1,092    |
| Constant                | -4,243  | ,451     | 88,672  | 1  | ,000 | ,014   |          |

Variables in the Equation

|                     |            | 95% C.I... |
|---------------------|------------|------------|
|                     |            | Upper      |
| Step 1 <sup>a</sup> | bv3        |            |
|                     | bv3(1)     | 1,024      |
|                     | bv3(2)     | 1,436      |
|                     | VASTY2     |            |
|                     | VASTY2(1)  | 5,207      |
|                     | VASTY2(2)  | 6,439      |
|                     | VASTY2(3)  | 1,666      |
|                     | VASTY2(4)  | 4,918      |
|                     | VASTY2(5)  | 2,797      |
|                     | VASTY2(6)  | .          |
|                     | VASTY2(7)  | 7,153      |
|                     | VASTY2(8)  | 4,421      |
|                     | VASTY2(9)  | 4,248      |
|                     | VASTY2(10) | 12,583     |
|                     | VASTY2(11) | 12,023     |
|                     | VASTY2(12) | 2,469      |
|                     | VASTY2(13) | 3,398      |
|                     | VASTY2(14) | 3,971      |
|                     | VASTY2(15) | 3,955      |
|                     | VASTY2(16) | 5,541      |
|                     | VASTY2(17) | .          |
|                     | VASTY2(18) | .          |
|                     | VASTY2(19) | 2,280      |
|                     | VASTY2(20) | 3,148      |
|                     | VASTY2(21) | 2,508      |
|                     | VASTY2(22) | 5,747      |
|                     | VASTY2(23) | 13,886     |
|                     | VASTY2(24) | 10,493     |
|                     | VASTY2(25) | 5,896      |
|                     | VASTY2(26) | 3,824      |
|                     | VASTY2(27) | 1,717      |
|                     | VASTY2(28) | 2,688      |
|                     | VASTY2(29) | .          |
|                     | VASTY2(30) | 4,860      |
|                     | VASTY2(31) | 9,399      |
|                     | VASTY2(32) | 4,022      |
|                     | VASTY2(33) | 3,323      |
|                     | VASTY2(34) | 1,698      |
|                     | VASTY2(35) | 8,976      |
|                     | Constant   |            |

a. Variable(s) entered on step 1: bv3, VASTY2.

```

LOGISTIC REGRESSION VARIABLES handlt1
/METHOD=ENTER sv3 VASTY2
/CONTRAST (sv3)=Indicator(1)
/CONTRAST (VASTY2)=Indicator(1)
/PRINT=CI(95)
/CRITERIA=PIN(0.05) POUT(0.10) ITERATE(20) CUT(0.5).

```

## Block 1: Method = Enter

### Omnibus Tests of Model Coefficients

|        |       | Chi-square | df | Sig. |
|--------|-------|------------|----|------|
| Step 1 | Step  | 210,059    | 37 | ,000 |
|        | Block | 210,059    | 37 | ,000 |
|        | Model | 210,059    | 37 | ,000 |

### Model Summary

| Step | -2 Log likelihood    | Cox & Snell R Square | Nagelkerke R Square |
|------|----------------------|----------------------|---------------------|
| 1    | 2208,72 <sup>a</sup> | ,017                 | ,095                |

a. Estimation terminated at iteration number 20 because maximum iterations has been reached. Final solution cannot be found.

### Classification Table<sup>a</sup>

|                    |                                | Predicted                      |                           |
|--------------------|--------------------------------|--------------------------------|---------------------------|
|                    |                                | handlt1 händelse larger than 1 | 0 ingen eller en händelse |
| Observed           |                                | 0 ingen eller en händelse      | 1 mer än en händelse      |
| Step 1             | handlt1 händelse larger than 1 | 12229                          | 0                         |
|                    |                                | 246                            | 0                         |
| Overall Percentage |                                |                                |                           |

Classification Table<sup>a</sup>

| Observed           |                                | Predicted                 |
|--------------------|--------------------------------|---------------------------|
|                    |                                | Percentage Correct        |
| Step 1             | handlt1 händelse larger than 1 | 0 ingen eller en händelse |
|                    |                                | 1 mer än en händelse      |
| Overall Percentage |                                | 98,0                      |

a. The cut value is ,500

Variables in the Equation

|                         | B       | S.E.     | Wald    | df | Sig. | Exp(B) | 95% C.I. |
|-------------------------|---------|----------|---------|----|------|--------|----------|
|                         |         |          |         |    |      |        | Lower    |
| Step 1 <sup>a</sup> sv3 |         |          | 1,277   | 2  | ,528 |        |          |
| sv3(1)                  | -,040   | ,181     | ,049    | 1  | ,824 | ,961   | ,674     |
| sv3(2)                  | ,163    | ,179     | ,825    | 1  | ,364 | 1,177  | ,828     |
| VASTY2                  |         |          | 118,011 | 35 | ,000 |        |          |
| VASTY2(1)               | ,445    | ,577     | ,597    | 1  | ,440 | 1,561  | ,504     |
| VASTY2(2)               | ,717    | ,550     | 1,696   | 1  | ,193 | 2,048  | ,696     |
| VASTY2(3)               | -1,597  | 1,098    | 2,114   | 1  | ,146 | ,203   | ,024     |
| VASTY2(4)               | ,490    | ,576     | ,724    | 1  | ,395 | 1,632  | ,528     |
| VASTY2(5)               | -,367   | ,737     | ,248    | 1  | ,618 | ,693   | ,164     |
| VASTY2(6)               | -17,038 | 2106,305 | ,000    | 1  | ,994 | ,000   | ,000     |
| VASTY2(7)               | ,923    | ,538     | 2,942   | 1  | ,086 | 2,516  | ,877     |
| VASTY2(8)               | ,383    | ,592     | ,419    | 1  | ,518 | 1,466  | ,460     |
| VASTY2(9)               | ,251    | ,610     | ,170    | 1  | ,680 | 1,286  | ,389     |
| VASTY2(10)              | 1,472   | ,508     | 8,390   | 1  | ,004 | 4,356  | 1,609    |
| VASTY2(11)              | 1,482   | ,503     | 8,661   | 1  | ,003 | 4,400  | 1,640    |
| VASTY2(12)              | -,601   | ,738     | ,663    | 1  | ,415 | ,548   | ,129     |
| VASTY2(13)              | -,112   | ,645     | ,030    | 1  | ,862 | ,894   | ,253     |
| VASTY2(14)              | ,121    | ,613     | ,039    | 1  | ,843 | 1,129  | ,340     |
| VASTY2(15)              | ,094    | ,616     | ,023    | 1  | ,878 | 1,099  | ,329     |
| VASTY2(16)              | ,193    | ,737     | ,068    | 1  | ,794 | 1,212  | ,286     |
| VASTY2(17)              | -16,906 | 2103,049 | ,000    | 1  | ,994 | ,000   | ,000     |
| VASTY2(18)              | -16,854 | 2112,495 | ,000    | 1  | ,994 | ,000   | ,000     |
| VASTY2(19)              | -1,548  | 1,105    | 1,964   | 1  | ,161 | ,213   | ,024     |
| VASTY2(20)              | -,372   | ,737     | ,255    | 1  | ,614 | ,690   | ,163     |
| VASTY2(21)              | -,489   | ,735     | ,443    | 1  | ,506 | ,613   | ,145     |
| VASTY2(22)              | ,596    | ,563     | 1,122   | 1  | ,289 | 1,815  | ,602     |
| VASTY2(23)              | 1,637   | ,498     | 10,821  | 1  | ,001 | 5,142  | 1,938    |
| VASTY2(24)              | 1,334   | ,509     | 6,853   | 1  | ,009 | 3,795  | 1,398    |
| VASTY2(25)              | ,613    | ,592     | 1,071   | 1  | ,301 | 1,846  | ,578     |

Variables in the Equation

|                     |            | 95% C.I... |
|---------------------|------------|------------|
|                     |            | Upper      |
| Step 1 <sup>a</sup> | sv3        |            |
|                     | sv3(1)     | 1,369      |
|                     | sv3(2)     | 1,671      |
|                     | VASTY2     |            |
|                     | VASTY2(1)  | 4,833      |
|                     | VASTY2(2)  | 6,021      |
|                     | VASTY2(3)  | 1,743      |
|                     | VASTY2(4)  | 5,041      |
|                     | VASTY2(5)  | 2,936      |
|                     | VASTY2(6)  | .          |
|                     | VASTY2(7)  | 7,223      |
|                     | VASTY2(8)  | 4,676      |
|                     | VASTY2(9)  | 4,253      |
|                     | VASTY2(10) | 11,791     |
|                     | VASTY2(11) | 11,803     |
|                     | VASTY2(12) | 2,329      |
|                     | VASTY2(13) | 3,162      |
|                     | VASTY2(14) | 3,753      |
|                     | VASTY2(15) | 3,672      |
|                     | VASTY2(16) | 5,143      |
|                     | VASTY2(17) | .          |
|                     | VASTY2(18) | .          |
|                     | VASTY2(19) | 1,853      |
|                     | VASTY2(20) | 2,922      |
|                     | VASTY2(21) | 2,588      |
|                     | VASTY2(22) | 5,471      |
|                     | VASTY2(23) | 13,641     |
|                     | VASTY2(24) | 10,300     |
|                     | VASTY2(25) | 5,896      |

**Variables in the Equation**

|            | B       | S.E.     | Wald   | df | Sig. | Exp(B) | 95% C.I. |
|------------|---------|----------|--------|----|------|--------|----------|
|            |         |          |        |    |      |        | Lower    |
| VASTY2(26) | -,011   | ,676     | ,000   | 1  | ,987 | ,989   | ,263     |
| VASTY2(27) | -1,698  | 1,100    | 2,381  | 1  | ,123 | ,183   | ,021     |
| VASTY2(28) | -1,261  | 1,105    | 1,304  | 1  | ,254 | ,283   | ,033     |
| VASTY2(29) | -17,056 | 2100,912 | ,000   | 1  | ,994 | ,000   | ,000     |
| VASTY2(30) | ,511    | ,577     | ,784   | 1  | ,376 | 1,666  | ,538     |
| VASTY2(31) | 1,190   | ,532     | 4,999  | 1  | ,025 | 3,288  | 1,158    |
| VASTY2(32) | ,086    | ,648     | ,018   | 1  | ,894 | 1,090  | ,306     |
| VASTY2(33) | -,148   | ,686     | ,047   | 1  | ,829 | ,862   | ,225     |
| VASTY2(34) | -1,618  | 1,098    | 2,171  | 1  | ,141 | ,198   | ,023     |
| VASTY2(35) | 1,108   | ,533     | 4,319  | 1  | ,038 | 3,028  | 1,065    |
| Constant   | -4,309  | ,458     | 88,559 | 1  | ,000 | ,013   |          |

**Variables in the Equation**

|            | 95% C.I. |
|------------|----------|
|            | Upper    |
| VASTY2(26) | 3,718    |
| VASTY2(27) | 1,582    |
| VASTY2(28) | 2,469    |
| VASTY2(29) | .        |
| VASTY2(30) | 5,161    |
| VASTY2(31) | 9,335    |
| VASTY2(32) | 3,884    |
| VASTY2(33) | 3,307    |
| VASTY2(34) | 1,706    |
| VASTY2(35) | 8,610    |
| Constant   |          |

a. Variable(s) entered on step 1: sv3, VASTY2.

```
LOGISTIC REGRESSION VARIABLES handlt1
/METHOD=ENTER sv5 VASTY2
/CONTRAST (sv5)=Indicator(1)
/CONTRAST (VASTY2)=Indicator(1)
/PRINT=CI(95)
/CRITERIA=PIN(0.05) POUT(0.10) ITERATE(20) CUT(0.5).
```

**Block 1: Method = Enter**

**Omnibus Tests of Model Coefficients**

|        |       | Chi-square | df | Sig. |
|--------|-------|------------|----|------|
| Step 1 | Step  | 212,136    | 39 | ,000 |
|        | Block | 212,136    | 39 | ,000 |
|        | Model | 212,136    | 39 | ,000 |

**Model Summary**

| Step | -2 Log likelihood    | Cox & Snell R Square | Nagelkerke R Square |
|------|----------------------|----------------------|---------------------|
| 1    | 2206,65 <sup>a</sup> | ,017                 | ,096                |

a. Estimation terminated at iteration number 20 because maximum iterations has been reached. Final solution cannot be found.

**Classification Table<sup>a</sup>**

| Observed           |                                | Predicted                      |                           |
|--------------------|--------------------------------|--------------------------------|---------------------------|
|                    |                                | handlt1 händelse larger than 1 | 0 ingen eller en händelse |
| Step 1             | handlt1 händelse larger than 1 | 12229                          | 0                         |
|                    | 0 ingen eller en händelse      | 246                            | 0                         |
| Overall Percentage |                                |                                |                           |

**Classification Table<sup>a</sup>**

| Observed           |                                | Predicted          |
|--------------------|--------------------------------|--------------------|
|                    |                                | Percentage Correct |
| Step 1             | handlt1 händelse larger than 1 | 100,0              |
|                    | 0 ingen eller en händelse      | ,0                 |
| Overall Percentage |                                | 98,0               |

a. The cut value is ,500



**Variables in the Equation**

|                         | B       | S.E.     | Wald    | df | Sig. | Exp(B) | 95% C.I. |
|-------------------------|---------|----------|---------|----|------|--------|----------|
|                         |         |          |         |    |      |        | Lower    |
| Step 1 <sup>a</sup> sv5 |         |          | 3,394   | 4  | ,494 |        |          |
| sv5(1)                  | -,117   | ,229     | ,259    | 1  | ,611 | ,890   | ,568     |
| sv5(2)                  | ,028    | ,230     | ,014    | 1  | ,904 | 1,028  | ,655     |
| sv5(3)                  | -,035   | ,217     | ,026    | 1  | ,871 | ,965   | ,631     |
| sv5(4)                  | ,294    | ,234     | 1,585   | 1  | ,208 | 1,342  | ,849     |
| VASTY2                  |         |          | 118,179 | 35 | ,000 |        |          |
| VASTY2(1)               | ,429    | ,577     | ,552    | 1  | ,458 | 1,535  | ,495     |
| VASTY2(2)               | ,638    | ,555     | 1,321   | 1  | ,250 | 1,893  | ,638     |
| VASTY2(3)               | -1,608  | 1,098    | 2,144   | 1  | ,143 | ,200   | ,023     |
| VASTY2(4)               | ,492    | ,576     | ,730    | 1  | ,393 | 1,635  | ,529     |
| VASTY2(5)               | -,380   | ,737     | ,266    | 1  | ,606 | ,684   | ,161     |
| VASTY2(6)               | -17,166 | 2104,809 | ,000    | 1  | ,993 | ,000   | ,000     |
| VASTY2(7)               | ,930    | ,538     | 2,987   | 1  | ,084 | 2,534  | ,883     |
| VASTY2(8)               | ,360    | ,592     | ,371    | 1  | ,543 | 1,434  | ,449     |
| VASTY2(9)               | ,260    | ,610     | ,181    | 1  | ,670 | 1,297  | ,392     |
| VASTY2(10)              | 1,379   | ,515     | 7,181   | 1  | ,007 | 3,972  | 1,448    |
| VASTY2(11)              | 1,476   | ,504     | 8,586   | 1  | ,003 | 4,373  | 1,630    |
| VASTY2(12)              | -,646   | ,740     | ,764    | 1  | ,382 | ,524   | ,123     |
| VASTY2(13)              | -,206   | ,650     | ,100    | 1  | ,752 | ,814   | ,228     |
| VASTY2(14)              | ,071    | ,615     | ,013    | 1  | ,909 | 1,073  | ,321     |
| VASTY2(15)              | ,027    | ,619     | ,002    | 1  | ,965 | 1,027  | ,305     |
| VASTY2(16)              | ,147    | ,739     | ,039    | 1  | ,843 | 1,158  | ,272     |
| VASTY2(17)              | -16,914 | 2102,229 | ,000    | 1  | ,994 | ,000   | ,000     |
| VASTY2(18)              | -16,815 | 2112,424 | ,000    | 1  | ,994 | ,000   | ,000     |
| VASTY2(19)              | -1,505  | 1,110    | 1,839   | 1  | ,175 | ,222   | ,025     |
| VASTY2(20)              | -,442   | ,740     | ,356    | 1  | ,551 | ,643   | ,151     |
| VASTY2(21)              | -,490   | ,735     | ,444    | 1  | ,505 | ,613   | ,145     |
| VASTY2(22)              | ,591    | ,563     | 1,103   | 1  | ,294 | 1,806  | ,599     |
| VASTY2(23)              | 1,633   | ,498     | 10,759  | 1  | ,001 | 5,121  | 1,930    |
| VASTY2(24)              | 1,300   | ,511     | 6,486   | 1  | ,011 | 3,670  | 1,349    |
| VASTY2(25)              | ,595    | ,593     | 1,007   | 1  | ,316 | 1,813  | ,567     |
| VASTY2(26)              | -,016   | ,676     | ,001    | 1  | ,981 | ,984   | ,261     |
| VASTY2(27)              | -1,759  | 1,102    | 2,549   | 1  | ,110 | ,172   | ,020     |
| VASTY2(28)              | -1,415  | 1,111    | 1,620   | 1  | ,203 | ,243   | ,028     |
| VASTY2(29)              | -17,217 | 2100,737 | ,000    | 1  | ,993 | ,000   | ,000     |
| VASTY2(30)              | ,503    | ,577     | ,759    | 1  | ,384 | 1,653  | ,534     |
| VASTY2(31)              | 1,212   | ,537     | 5,089   | 1  | ,024 | 3,360  | 1,172    |
| VASTY2(32)              | ,125    | ,656     | ,036    | 1  | ,849 | 1,133  | ,313     |
| VASTY2(33)              | -,105   | ,694     | ,023    | 1  | ,880 | ,900   | ,231     |
| VASTY2(34)              | -1,625  | 1,098    | 2,190   | 1  | ,139 | ,197   | ,023     |
| VASTY2(35)              | 1,117   | ,534     | 4,375   | 1  | ,036 | 3,054  | 1,073    |
| Constant                | -4,276  | ,469     | 83,025  | 1  | ,000 | ,014   |          |

Variables in the Equation

|                     |            | 95% C.I... |
|---------------------|------------|------------|
|                     |            | Upper      |
| Step 1 <sup>a</sup> | sv5        |            |
|                     | sv5(1)     | 1,394      |
|                     | sv5(2)     | 1,613      |
|                     | sv5(3)     | 1,477      |
|                     | sv5(4)     | 2,123      |
|                     | VASTY2     |            |
|                     | VASTY2(1)  | 4,757      |
|                     | VASTY2(2)  | 5,622      |
|                     | VASTY2(3)  | 1,724      |
|                     | VASTY2(4)  | 5,052      |
|                     | VASTY2(5)  | 2,898      |
|                     | VASTY2(6)  | .          |
|                     | VASTY2(7)  | 7,273      |
|                     | VASTY2(8)  | 4,577      |
|                     | VASTY2(9)  | 4,290      |
|                     | VASTY2(10) | 10,893     |
|                     | VASTY2(11) | 11,734     |
|                     | VASTY2(12) | 2,233      |
|                     | VASTY2(13) | 2,912      |
|                     | VASTY2(14) | 3,584      |
|                     | VASTY2(15) | 3,456      |
|                     | VASTY2(16) | 4,932      |
|                     | VASTY2(17) | .          |
|                     | VASTY2(18) | .          |
|                     | VASTY2(19) | 1,955      |
|                     | VASTY2(20) | 2,741      |
|                     | VASTY2(21) | 2,587      |
|                     | VASTY2(22) | 5,444      |
|                     | VASTY2(23) | 13,590     |
|                     | VASTY2(24) | 9,982      |
|                     | VASTY2(25) | 5,794      |
|                     | VASTY2(26) | 3,701      |
|                     | VASTY2(27) | 1,493      |
|                     | VASTY2(28) | 2,146      |
|                     | VASTY2(29) | .          |
|                     | VASTY2(30) | 5,123      |
|                     | VASTY2(31) | 9,627      |
|                     | VASTY2(32) | 4,095      |
|                     | VASTY2(33) | 3,510      |
|                     | VASTY2(34) | 1,694      |
|                     | VASTY2(35) | 8,696      |
|                     | Constant   |            |

a. Variable(s) entered on step 1: sv5, VASTY2.

```
LOGISTIC REGRESSION VARIABLES handlt1
/METHOD=ENTER sv7 VASTY2
/CONTRAST (sv7)=Indicator(1)
/CONTRAST (VASTY2)=Indicator(1)
/PRINT=CI(95)
/CRITERIA=PIN(0.05) POUT(0.10) ITERATE(20) CUT(0.5).
```

## Block 1: Method = Enter

### Omnibus Tests of Model Coefficients

|        |       | Chi-square | df | Sig. |
|--------|-------|------------|----|------|
| Step 1 | Step  | 219,500    | 41 | ,000 |
|        | Block | 219,500    | 41 | ,000 |
|        | Model | 219,500    | 41 | ,000 |

### Model Summary

| Step | -2 Log likelihood    | Cox & Snell R Square | Nagelkerke R Square |
|------|----------------------|----------------------|---------------------|
| 1    | 2199,28 <sup>a</sup> | ,017                 | ,099                |

a. Estimation terminated at iteration number 20 because maximum iterations has been reached. Final solution cannot be found.

Classification Table<sup>a</sup>

|                    |                                |                           | Predicted                      |                      |
|--------------------|--------------------------------|---------------------------|--------------------------------|----------------------|
|                    |                                |                           | handlt1 händelse larger than 1 |                      |
| Observed           |                                |                           | 0 ingen eller en händelse      | 1 mer än en händelse |
| Step 1             | handlt1 händelse larger than 1 | 0 ingen eller en händelse | 12229                          | 0                    |
|                    |                                | 1 mer än en händelse      | 246                            | 0                    |
| Overall Percentage |                                |                           |                                |                      |

Classification Table<sup>a</sup>

| Observed           |                                | Predicted                 |       |
|--------------------|--------------------------------|---------------------------|-------|
|                    |                                | Percentage Correct        |       |
| Step 1             | handlt1 händelse larger than 1 | 0 ingen eller en händelse | 100,0 |
|                    |                                | 1 mer än en händelse      | ,0    |
| Overall Percentage |                                |                           | 98,0  |

a. The cut value is ,500

Variables in the Equation

|                         | B       | S.E.     | Wald    | df | Sig. | Exp(B) | 95% C.I. |       |
|-------------------------|---------|----------|---------|----|------|--------|----------|-------|
|                         |         |          |         |    |      |        | Lower    | Upper |
| Step 1 <sup>a</sup> sv7 |         |          | 11,121  | 6  | ,085 |        |          |       |
| sv7(1)                  | -,095   | ,265     | ,130    | 1  | ,719 | ,909   |          | ,541  |
| sv7(2)                  | ,002    | ,281     | ,000    | 1  | ,995 | 1,002  |          | ,577  |
| sv7(3)                  | ,059    | ,271     | ,048    | 1  | ,827 | 1,061  |          | ,623  |
| sv7(4)                  | -,039   | ,269     | ,021    | 1  | ,886 | ,962   |          | ,568  |
| sv7(5)                  | ,193    | ,247     | ,607    | 1  | ,436 | 1,213  |          | ,747  |
| sv7(6)                  | ,725    | ,278     | 6,787   | 1  | ,009 | 2,065  |          | 1,197 |
| VASTY2                  |         |          | 120,926 | 35 | ,000 |        |          |       |
| VASTY2(1)               | ,364    | ,578     | ,396    | 1  | ,529 | 1,439  |          | ,464  |
| VASTY2(2)               | ,454    | ,559     | ,660    | 1  | ,417 | 1,575  |          | ,527  |
| VASTY2(3)               | -1,603  | 1,098    | 2,131   | 1  | ,144 | ,201   |          | ,023  |
| VASTY2(4)               | ,468    | ,576     | ,659    | 1  | ,417 | 1,596  |          | ,516  |
| VASTY2(5)               | -,371   | ,737     | ,253    | 1  | ,615 | ,690   |          | ,163  |
| VASTY2(6)               | -17,485 | 2098,395 | ,000    | 1  | ,993 | ,000   |          | ,000  |
| VASTY2(7)               | ,922    | ,538     | 2,936   | 1  | ,087 | 2,514  |          | ,876  |
| VASTY2(8)               | ,367    | ,593     | ,385    | 1  | ,535 | 1,444  |          | ,452  |
| VASTY2(9)               | ,251    | ,611     | ,168    | 1  | ,681 | 1,285  |          | ,388  |
| VASTY2(10)              | 1,167   | ,519     | 5,065   | 1  | ,024 | 3,213  |          | 1,163 |
| VASTY2(11)              | 1,466   | ,504     | 8,452   | 1  | ,004 | 4,331  |          | 1,612 |
| VASTY2(12)              | -,768   | ,741     | 1,074   | 1  | ,300 | ,464   |          | ,109  |
| VASTY2(13)              | -,435   | ,654     | ,442    | 1  | ,506 | ,647   |          | ,180  |
| VASTY2(14)              | -,061   | ,617     | ,010    | 1  | ,921 | ,941   |          | ,281  |
| VASTY2(15)              | -,163   | ,623     | ,069    | 1  | ,793 | ,849   |          | ,251  |
| VASTY2(16)              | -,008   | ,743     | ,000    | 1  | ,991 | ,992   |          | ,231  |
| VASTY2(17)              | -16,945 | 2098,533 | ,000    | 1  | ,994 | ,000   |          | ,000  |
| VASTY2(18)              | -16,806 | 2112,381 | ,000    | 1  | ,994 | ,000   |          | ,000  |
| VASTY2(19)              | -1,493  | 1,114    | 1,798   | 1  | ,180 | ,225   |          | ,025  |
| VASTY2(20)              | -,619   | ,743     | ,694    | 1  | ,405 | ,538   |          | ,125  |
| VASTY2(21)              | -,502   | ,735     | ,467    | 1  | ,494 | ,605   |          | ,143  |

Variables in the Equation

|                     |            | 95% C.I... |
|---------------------|------------|------------|
|                     |            | Upper      |
| Step 1 <sup>a</sup> | sv7        |            |
|                     | sv7(1)     | 1,527      |
|                     | sv7(2)     | 1,739      |
|                     | sv7(3)     | 1,806      |
|                     | sv7(4)     | 1,630      |
|                     | sv7(5)     | 1,969      |
|                     | sv7(6)     | 3,563      |
|                     | VASTY2     |            |
|                     | VASTY2(1)  | 4,467      |
|                     | VASTY2(2)  | 4,707      |
|                     | VASTY2(3)  | 1,732      |
|                     | VASTY2(4)  | 4,936      |
|                     | VASTY2(5)  | 2,926      |
|                     | VASTY2(6)  | .          |
|                     | VASTY2(7)  | 7,217      |
|                     | VASTY2(8)  | 4,613      |
|                     | VASTY2(9)  | 4,252      |
|                     | VASTY2(10) | 8,882      |
|                     | VASTY2(11) | 11,633     |
|                     | VASTY2(12) | 1,982      |
|                     | VASTY2(13) | 2,332      |
|                     | VASTY2(14) | 3,154      |
|                     | VASTY2(15) | 2,878      |
|                     | VASTY2(16) | 4,251      |
|                     | VASTY2(17) | .          |
|                     | VASTY2(18) | .          |
|                     | VASTY2(19) | 1,992      |
|                     | VASTY2(20) | 2,311      |
|                     | VASTY2(21) | 2,555      |

**Variables in the Equation**

|            | B       | S.E.     | Wald   | df | Sig. | Exp(B) | 95% C.I. |
|------------|---------|----------|--------|----|------|--------|----------|
|            |         |          |        |    |      |        | Lower    |
| VASTY2(22) | ,587    | ,563     | 1,088  | 1  | ,297 | 1,799  | ,597     |
| VASTY2(23) | 1,633   | ,498     | 10,751 | 1  | ,001 | 5,120  | 1,929    |
| VASTY2(24) | 1,223   | ,512     | 5,712  | 1  | ,017 | 3,398  | 1,246    |
| VASTY2(25) | ,597    | ,593     | 1,013  | 1  | ,314 | 1,817  | ,568     |
| VASTY2(26) | -,060   | ,676     | ,008   | 1  | ,930 | ,942   | ,250     |
| VASTY2(27) | -1,952  | 1,104    | 3,123  | 1  | ,077 | ,142   | ,016     |
| VASTY2(28) | -1,788  | 1,117    | 2,561  | 1  | ,109 | ,167   | ,019     |
| VASTY2(29) | -17,601 | 2099,708 | ,000   | 1  | ,993 | ,000   | ,000     |
| VASTY2(30) | ,504    | ,577     | ,763   | 1  | ,383 | 1,655  | ,534     |
| VASTY2(31) | 1,211   | ,538     | 5,066  | 1  | ,024 | 3,357  | 1,169    |
| VASTY2(32) | ,134    | ,660     | ,041   | 1  | ,839 | 1,143  | ,314     |
| VASTY2(33) | -,093   | ,700     | ,018   | 1  | ,894 | ,911   | ,231     |
| VASTY2(34) | -1,645  | 1,098    | 2,243  | 1  | ,134 | ,193   | ,022     |
| VASTY2(35) | 1,051   | ,535     | 3,864  | 1  | ,049 | 2,861  | 1,003    |
| Constant   | -4,309  | ,480     | 80,714 | 1  | ,000 | ,013   |          |

**Variables in the Equation**

|            | 95% C.I. |
|------------|----------|
|            | Upper    |
| VASTY2(22) | 5,423    |
| VASTY2(23) | 13,591   |
| VASTY2(24) | 9,264    |
| VASTY2(25) | 5,808    |
| VASTY2(26) | 3,547    |
| VASTY2(27) | 1,237    |
| VASTY2(28) | 1,494    |
| VASTY2(29) | .        |
| VASTY2(30) | 5,131    |
| VASTY2(31) | 9,639    |
| VASTY2(32) | 4,170    |
| VASTY2(33) | 3,593    |
| VASTY2(34) | 1,661    |
| VASTY2(35) | 8,163    |
| Constant   |          |

a. Variable(s) entered on step 1: sv7, VASTY2.

\*\*

```

/METHOD=ENTER bv1 VASTY2
/CONTRAST (bv1)=Indicator(1)
/CONTRAST (VASTY2)=Indicator(1)
/PRINT=CI(95)
/CRITERIA=PIN(0.05) POUT(0.10) ITERATE(20) CUT(0.5).

```

## Block 1: Method = Enter

### Omnibus Tests of Model Coefficients

|        |       | Chi-square | df | Sig. |
|--------|-------|------------|----|------|
| Step 1 | Step  | 724,914    | 37 | ,000 |
|        | Block | 724,914    | 37 | ,000 |
|        | Model | 724,914    | 37 | ,000 |

### Model Summary

| Step | -2 Log likelihood    | Cox & Snell R Square | Nagelkerke R Square |
|------|----------------------|----------------------|---------------------|
| 1    | 4299,93 <sup>a</sup> | ,056                 | ,170                |

a. Estimation terminated at iteration number 20 because maximum iterations has been reached. Final solution cannot be found.

### Classification Table<sup>a</sup>

| Observed           |                             | Predicted                   |                      |                    |       |
|--------------------|-----------------------------|-----------------------------|----------------------|--------------------|-------|
|                    |                             | dod01 dödsfall ja eller nej |                      | Percentage Correct |       |
|                    |                             | 0 inget dödsfall            | 1 minst ett dödsfall |                    |       |
| Step 1             | dod01 dödsfall ja eller nej | 0 inget dödsfall            | 11839                | 0                  | 100,0 |
|                    |                             | 1 minst ett dödsfall        | 636                  | 0                  | ,0    |
| Overall Percentage |                             |                             |                      |                    | 94,9  |

a. The cut value is ,500

**Variables in the Equation**

|                         | B       | S.E.     | Wald    | df | Sig. | Exp(B) | 95% C.I. |
|-------------------------|---------|----------|---------|----|------|--------|----------|
|                         |         |          |         |    |      |        | Lower    |
| Step 1 <sup>a</sup> bv1 |         |          | 22,134  | 2  | ,000 |        |          |
| bv1(1)                  | -,257   | ,129     | 3,959   | 1  | ,047 | ,774   | ,601     |
| bv1(2)                  | ,342    | ,097     | 12,446  | 1  | ,000 | 1,407  | 1,164    |
| VASTY2                  |         |          | 211,297 | 35 | ,000 |        |          |
| VASTY2(1)               | ,597    | ,343     | 3,036   | 1  | ,081 | 1,817  | ,928     |
| VASTY2(2)               | ,710    | ,335     | 4,494   | 1  | ,034 | 2,034  | 1,055    |
| VASTY2(3)               | ,618    | ,335     | 3,404   | 1  | ,065 | 1,855  | ,962     |
| VASTY2(4)               | ,020    | ,371     | ,003    | 1  | ,957 | 1,020  | ,493     |
| VASTY2(5)               | -,856   | ,495     | 2,997   | 1  | ,083 | ,425   | ,161     |
| VASTY2(6)               | -18,130 | 2100,109 | ,000    | 1  | ,993 | ,000   | ,000     |
| VASTY2(7)               | 1,454   | ,310     | 21,969  | 1  | ,000 | 4,282  | 2,331    |
| VASTY2(8)               | ,736    | ,332     | 4,911   | 1  | ,027 | 2,087  | 1,089    |
| VASTY2(9)               | ,262    | ,362     | ,525    | 1  | ,469 | 1,300  | ,639     |
| VASTY2(10)              | ,716    | ,334     | 4,606   | 1  | ,032 | 2,046  | 1,064    |
| VASTY2(11)              | ,318    | ,357     | ,791    | 1  | ,374 | 1,374  | ,682     |
| VASTY2(12)              | 1,216   | ,315     | 14,887  | 1  | ,000 | 3,373  | 1,819    |
| VASTY2(13)              | 1,356   | ,311     | 19,014  | 1  | ,000 | 3,880  | 2,110    |
| VASTY2(14)              | ,687    | ,334     | 4,234   | 1  | ,040 | 1,989  | 1,033    |
| VASTY2(15)              | ,122    | ,369     | ,109    | 1  | ,742 | 1,130  | ,547     |
| VASTY2(16)              | -,905   | ,644     | 1,974   | 1  | ,160 | ,405   | ,115     |
| VASTY2(17)              | -17,967 | 2097,899 | ,000    | 1  | ,993 | ,000   | ,000     |
| VASTY2(18)              | -2,701  | 1,038    | 6,771   | 1  | ,009 | ,067   | ,009     |
| VASTY2(19)              | -2,459  | 1,041    | 5,580   | 1  | ,018 | ,085   | ,011     |
| VASTY2(20)              | -1,506  | ,642     | 5,495   | 1  | ,019 | ,222   | ,063     |
| VASTY2(21)              | ,502    | ,345     | 2,112   | 1  | ,146 | 1,652  | ,839     |
| VASTY2(22)              | 1,238   | ,322     | 14,823  | 1  | ,000 | 3,450  | 1,837    |
| VASTY2(23)              | ,542    | ,348     | 2,429   | 1  | ,119 | 1,720  | ,870     |
| VASTY2(24)              | 1,296   | ,312     | 17,212  | 1  | ,000 | 3,654  | 1,981    |
| VASTY2(25)              | -,214   | ,435     | ,242    | 1  | ,623 | ,807   | ,344     |
| VASTY2(26)              | -18,081 | 2348,740 | ,000    | 1  | ,994 | ,000   | ,000     |
| VASTY2(27)              | -18,116 | 2094,245 | ,000    | 1  | ,993 | ,000   | ,000     |
| VASTY2(28)              | -18,130 | 2674,028 | ,000    | 1  | ,995 | ,000   | ,000     |
| VASTY2(29)              | -18,057 | 2095,696 | ,000    | 1  | ,993 | ,000   | ,000     |
| VASTY2(30)              | -,076   | ,386     | ,038    | 1  | ,845 | ,927   | ,435     |
| VASTY2(31)              | -18,034 | 2092,698 | ,000    | 1  | ,993 | ,000   | ,000     |
| VASTY2(32)              | -1,953  | ,760     | 6,595   | 1  | ,010 | ,142   | ,032     |
| VASTY2(33)              | -2,673  | 1,038    | 6,628   | 1  | ,010 | ,069   | ,009     |
| VASTY2(34)              | ,433    | ,351     | 1,526   | 1  | ,217 | 1,542  | ,776     |
| VASTY2(35)              | -18,165 | 2257,371 | ,000    | 1  | ,994 | ,000   | ,000     |
| Constant                | -3,204  | ,275     | 135,335 | 1  | ,000 | ,041   |          |



Variables in the Equation

|                     |            | 95% C.I... |
|---------------------|------------|------------|
|                     |            | Upper      |
| Step 1 <sup>a</sup> | bv1        |            |
|                     | bv1(1)     | ,996       |
|                     | bv1(2)     | 1,701      |
|                     | VASTY2     |            |
|                     | VASTY2(1)  | 3,559      |
|                     | VASTY2(2)  | 3,920      |
|                     | VASTY2(3)  | 3,574      |
|                     | VASTY2(4)  | 2,113      |
|                     | VASTY2(5)  | 1,120      |
|                     | VASTY2(6)  | .          |
|                     | VASTY2(7)  | 7,867      |
|                     | VASTY2(8)  | 4,002      |
|                     | VASTY2(9)  | 2,643      |
|                     | VASTY2(10) | 3,933      |
|                     | VASTY2(11) | 2,768      |
|                     | VASTY2(12) | 6,256      |
|                     | VASTY2(13) | 7,138      |
|                     | VASTY2(14) | 3,828      |
|                     | VASTY2(15) | 2,330      |
|                     | VASTY2(16) | 1,429      |
|                     | VASTY2(17) | .          |
|                     | VASTY2(18) | ,513       |
|                     | VASTY2(19) | ,658       |
|                     | VASTY2(20) | ,781       |
|                     | VASTY2(21) | 3,251      |
|                     | VASTY2(22) | 6,481      |
|                     | VASTY2(23) | 3,400      |
|                     | VASTY2(24) | 6,739      |
|                     | VASTY2(25) | 1,894      |
|                     | VASTY2(26) | .          |
|                     | VASTY2(27) | .          |
|                     | VASTY2(28) | .          |
|                     | VASTY2(29) | .          |
|                     | VASTY2(30) | 1,976      |
|                     | VASTY2(31) | .          |
|                     | VASTY2(32) | ,630       |
|                     | VASTY2(33) | ,528       |
|                     | VASTY2(34) | 3,067      |
|                     | VASTY2(35) | .          |
|                     | Constant   |            |

a. Variable(s) entered on step 1: bv1, VASTY2.

```

LOGISTIC REGRESSION VARIABLES dod01
/METHOD=ENTER bv2 VASTY2
/CONTRAST (bv2)=Indicator(1)
/CONTRAST (VASTY2)=Indicator(1)
/PRINT=CI(95)
/CRITERIA=PIN(0.05) POUT(0.10) ITERATE(20) CUT(0.5).

```

## Block 1: Method = Enter

### Omnibus Tests of Model Coefficients

|        |       | Chi-square | df | Sig. |
|--------|-------|------------|----|------|
| Step 1 | Step  | 719,171    | 37 | ,000 |
|        | Block | 719,171    | 37 | ,000 |
|        | Model | 719,171    | 37 | ,000 |

### Model Summary

| Step | -2 Log likelihood    | Cox & Snell R Square | Nagelkerke R Square |
|------|----------------------|----------------------|---------------------|
| 1    | 4305,67 <sup>a</sup> | ,056                 | ,169                |

a. Estimation terminated at iteration number 20 because maximum iterations has been reached. Final solution cannot be found.

### Classification Table<sup>a</sup>

| Observed           |                             | Predicted                   |                      |                    |       |
|--------------------|-----------------------------|-----------------------------|----------------------|--------------------|-------|
|                    |                             | dod01 dödsfall ja eller nej |                      | Percentage Correct |       |
|                    |                             | 0 inget dödsfall            | 1 minst ett dödsfall |                    |       |
| Step 1             | dod01 dödsfall ja eller nej | 0 inget dödsfall            | 11839                | 0                  | 100,0 |
|                    |                             | 1 minst ett dödsfall        | 636                  | 0                  | ,0    |
| Overall Percentage |                             |                             |                      |                    | 94,9  |

a. The cut value is ,500

**Variables in the Equation**

|                         | B       | S.E.     | Wald    | df | Sig. | Exp(B) | 95% C.I. |
|-------------------------|---------|----------|---------|----|------|--------|----------|
|                         |         |          |         |    |      |        | Lower    |
| Step 1 <sup>a</sup> bv2 |         |          | 16,401  | 2  | ,000 |        |          |
| bv2(1)                  | -,135   | ,126     | 1,159   | 1  | ,282 | ,873   | ,683     |
| bv2(2)                  | ,293    | ,110     | 7,157   | 1  | ,007 | 1,341  | 1,082    |
| VASTY2                  |         |          | 216,449 | 35 | ,000 |        |          |
| VASTY2(1)               | ,588    | ,343     | 2,943   | 1  | ,086 | 1,800  | ,920     |
| VASTY2(2)               | ,713    | ,335     | 4,530   | 1  | ,033 | 2,040  | 1,058    |
| VASTY2(3)               | ,667    | ,334     | 3,989   | 1  | ,046 | 1,948  | 1,012    |
| VASTY2(4)               | ,057    | ,371     | ,023    | 1  | ,879 | 1,058  | ,512     |
| VASTY2(5)               | -,846   | ,495     | 2,928   | 1  | ,087 | ,429   | ,163     |
| VASTY2(6)               | -18,089 | 2102,200 | ,000    | 1  | ,993 | ,000   | ,000     |
| VASTY2(7)               | 1,507   | ,309     | 23,789  | 1  | ,000 | 4,512  | 2,463    |
| VASTY2(8)               | ,740    | ,332     | 4,967   | 1  | ,026 | 2,097  | 1,093    |
| VASTY2(9)               | ,277    | ,362     | ,585    | 1  | ,444 | 1,319  | ,649     |
| VASTY2(10)              | ,726    | ,334     | 4,741   | 1  | ,029 | 2,067  | 1,075    |
| VASTY2(11)              | ,333    | ,357     | ,872    | 1  | ,350 | 1,396  | ,693     |
| VASTY2(12)              | 1,226   | ,315     | 15,131  | 1  | ,000 | 3,407  | 1,837    |
| VASTY2(13)              | 1,380   | ,311     | 19,697  | 1  | ,000 | 3,975  | 2,161    |
| VASTY2(14)              | ,704    | ,334     | 4,444   | 1  | ,035 | 2,022  | 1,051    |
| VASTY2(15)              | ,118    | ,370     | ,102    | 1  | ,749 | 1,126  | ,545     |
| VASTY2(16)              | -,884   | ,643     | 1,888   | 1  | ,169 | ,413   | ,117     |
| VASTY2(17)              | -17,963 | 2099,524 | ,000    | 1  | ,993 | ,000   | ,000     |
| VASTY2(18)              | -2,696  | 1,038    | 6,746   | 1  | ,009 | ,067   | ,009     |
| VASTY2(19)              | -2,518  | 1,040    | 5,866   | 1  | ,015 | ,081   | ,011     |
| VASTY2(20)              | -1,473  | ,642     | 5,267   | 1  | ,022 | ,229   | ,065     |
| VASTY2(21)              | ,509    | ,345     | 2,171   | 1  | ,141 | 1,664  | ,845     |
| VASTY2(22)              | 1,240   | ,322     | 14,832  | 1  | ,000 | 3,455  | 1,838    |
| VASTY2(23)              | ,535    | ,348     | 2,364   | 1  | ,124 | 1,707  | ,863     |
| VASTY2(24)              | 1,327   | ,312     | 18,094  | 1  | ,000 | 3,771  | 2,046    |
| VASTY2(25)              | -,207   | ,435     | ,227    | 1  | ,634 | ,813   | ,347     |
| VASTY2(26)              | -18,071 | 2350,974 | ,000    | 1  | ,994 | ,000   | ,000     |
| VASTY2(27)              | -18,100 | 2096,455 | ,000    | 1  | ,993 | ,000   | ,000     |
| VASTY2(28)              | -18,120 | 2675,298 | ,000    | 1  | ,995 | ,000   | ,000     |
| VASTY2(29)              | -18,037 | 2096,602 | ,000    | 1  | ,993 | ,000   | ,000     |
| VASTY2(30)              | -,060   | ,386     | ,024    | 1  | ,877 | ,942   | ,442     |
| VASTY2(31)              | -18,023 | 2095,727 | ,000    | 1  | ,993 | ,000   | ,000     |
| VASTY2(32)              | -1,954  | ,760     | 6,611   | 1  | ,010 | ,142   | ,032     |
| VASTY2(33)              | -2,670  | 1,038    | 6,616   | 1  | ,010 | ,069   | ,009     |
| VASTY2(34)              | ,442    | ,351     | 1,588   | 1  | ,208 | 1,556  | ,782     |
| VASTY2(35)              | -18,119 | 2259,904 | ,000    | 1  | ,994 | ,000   | ,000     |
| Constant                | -3,248  | ,282     | 132,759 | 1  | ,000 | ,039   |          |

Variables in the Equation

|                     |            | 95% C.I... |
|---------------------|------------|------------|
|                     |            | Upper      |
| Step 1 <sup>a</sup> | bv2        |            |
|                     | bv2(1)     | 1,117      |
|                     | bv2(2)     | 1,662      |
|                     | VASTY2     |            |
|                     | VASTY2(1)  | 3,525      |
|                     | VASTY2(2)  | 3,932      |
|                     | VASTY2(3)  | 3,749      |
|                     | VASTY2(4)  | 2,189      |
|                     | VASTY2(5)  | 1,131      |
|                     | VASTY2(6)  | .          |
|                     | VASTY2(7)  | 8,267      |
|                     | VASTY2(8)  | 4,021      |
|                     | VASTY2(9)  | 2,681      |
|                     | VASTY2(10) | 3,974      |
|                     | VASTY2(11) | 2,810      |
|                     | VASTY2(12) | 6,318      |
|                     | VASTY2(13) | 7,310      |
|                     | VASTY2(14) | 3,889      |
|                     | VASTY2(15) | 2,323      |
|                     | VASTY2(16) | 1,458      |
|                     | VASTY2(17) | .          |
|                     | VASTY2(18) | ,516       |
|                     | VASTY2(19) | ,619       |
|                     | VASTY2(20) | ,806       |
|                     | VASTY2(21) | 3,274      |
|                     | VASTY2(22) | 6,493      |
|                     | VASTY2(23) | 3,374      |
|                     | VASTY2(24) | 6,951      |
|                     | VASTY2(25) | 1,907      |
|                     | VASTY2(26) | .          |
|                     | VASTY2(27) | .          |
|                     | VASTY2(28) | .          |
|                     | VASTY2(29) | .          |
|                     | VASTY2(30) | 2,007      |
|                     | VASTY2(31) | .          |
|                     | VASTY2(32) | ,628       |
|                     | VASTY2(33) | ,530       |
|                     | VASTY2(34) | 3,093      |
|                     | VASTY2(35) | .          |
|                     | Constant   |            |

a. Variable(s) entered on step 1: bv2, VASTY2.

```

LOGISTIC REGRESSION VARIABLES dod01
/METHOD=ENTER bv3 VASTY2
/CONTRAST (bv3)=Indicator(1)
/CONTRAST (VASTY2)=Indicator(1)
/PRINT=CI(95)
/CRITERIA=PIN(0.05) POUT(0.10) ITERATE(20) CUT(0.5).

```

## Block 1: Method = Enter

### Omnibus Tests of Model Coefficients

|        |       | Chi-square | df | Sig. |
|--------|-------|------------|----|------|
| Step 1 | Step  | 717,578    | 37 | ,000 |
|        | Block | 717,578    | 37 | ,000 |
|        | Model | 717,578    | 37 | ,000 |

### Model Summary

| Step | -2 Log likelihood    | Cox & Snell R Square | Nagelkerke R Square |
|------|----------------------|----------------------|---------------------|
| 1    | 4307,26 <sup>a</sup> | ,056                 | ,169                |

a. Estimation terminated at iteration number 20 because maximum iterations has been reached. Final solution cannot be found.

### Classification Table<sup>a</sup>

|                    |                             | Predicted                   |                      |                    |
|--------------------|-----------------------------|-----------------------------|----------------------|--------------------|
|                    |                             | dod01 dödsfall ja eller nej |                      | Percentage Correct |
| Observed           |                             | 0 inget dödsfall            | 1 minst ett dödsfall |                    |
| Step 1             | dod01 dödsfall ja eller nej | 0 inget dödsfall            | 1 minst ett dödsfall |                    |
|                    |                             | 11839                       | 0                    | 100,0              |
|                    |                             | 636                         | 0                    | ,0                 |
| Overall Percentage |                             |                             |                      | 94,9               |

a. The cut value is ,500

**Variables in the Equation**

|                         | B       | S.E.     | Wald    | df | Sig. | Exp(B) | 95% C.I. |
|-------------------------|---------|----------|---------|----|------|--------|----------|
|                         |         |          |         |    |      |        | Lower    |
| Step 1 <sup>a</sup> bv3 |         |          | 15,036  | 2  | ,001 |        |          |
| bv3(1)                  | -,380   | ,199     | 3,646   | 1  | ,056 | ,684   | ,463     |
| bv3(2)                  | ,373    | ,116     | 10,375  | 1  | ,001 | 1,452  | 1,157    |
| VASTY2                  |         |          | 212,822 | 35 | ,000 |        |          |
| VASTY2(1)               | ,641    | ,343     | 3,494   | 1  | ,062 | 1,898  | ,969     |
| VASTY2(2)               | ,753    | ,334     | 5,064   | 1  | ,024 | 2,122  | 1,102    |
| VASTY2(3)               | ,680    | ,335     | 4,128   | 1  | ,042 | 1,973  | 1,024    |
| VASTY2(4)               | ,064    | ,371     | ,030    | 1  | ,862 | 1,066  | ,515     |
| VASTY2(5)               | -,816   | ,494     | 2,724   | 1  | ,099 | ,442   | ,168     |
| VASTY2(6)               | -18,094 | 2101,047 | ,000    | 1  | ,993 | ,000   | ,000     |
| VASTY2(7)               | 1,475   | ,313     | 22,211  | 1  | ,000 | 4,369  | 2,366    |
| VASTY2(8)               | ,790    | ,331     | 5,680   | 1  | ,017 | 2,203  | 1,151    |
| VASTY2(9)               | ,321    | ,361     | ,788    | 1  | ,375 | 1,378  | ,679     |
| VASTY2(10)              | ,769    | ,333     | 5,331   | 1  | ,021 | 2,157  | 1,123    |
| VASTY2(11)              | ,350    | ,357     | ,959    | 1  | ,327 | 1,419  | ,705     |
| VASTY2(12)              | 1,275   | ,314     | 16,435  | 1  | ,000 | 3,577  | 1,932    |
| VASTY2(13)              | 1,457   | ,309     | 22,198  | 1  | ,000 | 4,291  | 2,341    |
| VASTY2(14)              | ,747    | ,333     | 5,019   | 1  | ,025 | 2,110  | 1,098    |
| VASTY2(15)              | ,167    | ,369     | ,206    | 1  | ,650 | 1,182  | ,574     |
| VASTY2(16)              | -,915   | ,645     | 2,017   | 1  | ,156 | ,400   | ,113     |
| VASTY2(17)              | -17,981 | 2099,926 | ,000    | 1  | ,993 | ,000   | ,000     |
| VASTY2(18)              | -2,700  | 1,038    | 6,765   | 1  | ,009 | ,067   | ,009     |
| VASTY2(19)              | -2,448  | 1,044    | 5,504   | 1  | ,019 | ,086   | ,011     |
| VASTY2(20)              | -1,470  | ,642     | 5,239   | 1  | ,022 | ,230   | ,065     |
| VASTY2(21)              | ,534    | ,345     | 2,399   | 1  | ,121 | 1,707  | ,868     |
| VASTY2(22)              | 1,173   | ,321     | 13,390  | 1  | ,000 | 3,232  | 1,724    |
| VASTY2(23)              | ,542    | ,348     | 2,429   | 1  | ,119 | 1,719  | ,870     |
| VASTY2(24)              | 1,339   | ,312     | 18,387  | 1  | ,000 | 3,814  | 2,068    |
| VASTY2(25)              | -,201   | ,435     | ,214    | 1  | ,644 | ,818   | ,349     |
| VASTY2(26)              | -18,030 | 2351,071 | ,000    | 1  | ,994 | ,000   | ,000     |
| VASTY2(27)              | -18,052 | 2095,802 | ,000    | 1  | ,993 | ,000   | ,000     |
| VASTY2(28)              | -18,045 | 2677,010 | ,000    | 1  | ,995 | ,000   | ,000     |
| VASTY2(29)              | -18,030 | 2099,078 | ,000    | 1  | ,993 | ,000   | ,000     |
| VASTY2(30)              | -,063   | ,386     | ,027    | 1  | ,871 | ,939   | ,441     |
| VASTY2(31)              | -18,004 | 2092,378 | ,000    | 1  | ,993 | ,000   | ,000     |
| VASTY2(32)              | -1,931  | ,761     | 6,434   | 1  | ,011 | ,145   | ,033     |
| VASTY2(33)              | -2,636  | 1,039    | 6,441   | 1  | ,011 | ,072   | ,009     |
| VASTY2(34)              | ,454    | ,350     | 1,681   | 1  | ,195 | 1,575  | ,793     |
| VASTY2(35)              | -18,134 | 2257,580 | ,000    | 1  | ,994 | ,000   | ,000     |
| Constant                | -3,202  | ,273     | 137,651 | 1  | ,000 | ,041   |          |

Variables in the Equation

|                     |            | 95% C.I... |
|---------------------|------------|------------|
|                     |            | Upper      |
| Step 1 <sup>a</sup> | bv3        |            |
|                     | bv3(1)     | 1,010      |
|                     | bv3(2)     | 1,822      |
|                     | VASTY2     |            |
|                     | VASTY2(1)  | 3,716      |
|                     | VASTY2(2)  | 4,088      |
|                     | VASTY2(3)  | 3,802      |
|                     | VASTY2(4)  | 2,208      |
|                     | VASTY2(5)  | 1,165      |
|                     | VASTY2(6)  | .          |
|                     | VASTY2(7)  | 8,068      |
|                     | VASTY2(8)  | 4,219      |
|                     | VASTY2(9)  | 2,799      |
|                     | VASTY2(10) | 4,141      |
|                     | VASTY2(11) | 2,856      |
|                     | VASTY2(12) | 6,625      |
|                     | VASTY2(13) | 7,866      |
|                     | VASTY2(14) | 4,056      |
|                     | VASTY2(15) | 2,437      |
|                     | VASTY2(16) | 1,416      |
|                     | VASTY2(17) | .          |
|                     | VASTY2(18) | ,514       |
|                     | VASTY2(19) | ,668       |
|                     | VASTY2(20) | ,810       |
|                     | VASTY2(21) | 3,356      |
|                     | VASTY2(22) | 6,059      |
|                     | VASTY2(23) | 3,399      |
|                     | VASTY2(24) | 7,033      |
|                     | VASTY2(25) | 1,918      |
|                     | VASTY2(26) | .          |
|                     | VASTY2(27) | .          |
|                     | VASTY2(28) | .          |
|                     | VASTY2(29) | .          |
|                     | VASTY2(30) | 2,001      |
|                     | VASTY2(31) | .          |
|                     | VASTY2(32) | ,645       |
|                     | VASTY2(33) | ,549       |
|                     | VASTY2(34) | 3,130      |
|                     | VASTY2(35) | .          |
|                     | Constant   |            |

a. Variable(s) entered on step 1: bv3, VASTY2.

```

LOGISTIC REGRESSION VARIABLES dod01
/METHOD=ENTER sv3 VASTY2
/CONTRAST (sv3)=Indicator(1)
/CONTRAST (VASTY2)=Indicator(1)
/PRINT=CI(95)
/CRITERIA=PIN(0.05) POUT(0.10) ITERATE(20) CUT(0.5).

```

## Block 1: Method = Enter

### Omnibus Tests of Model Coefficients

|        |       | Chi-square | df | Sig. |
|--------|-------|------------|----|------|
| Step 1 | Step  | 709,696    | 37 | ,000 |
|        | Block | 709,696    | 37 | ,000 |
|        | Model | 709,696    | 37 | ,000 |

### Model Summary

| Step | -2 Log likelihood    | Cox & Snell R Square | Nagelkerke R Square |
|------|----------------------|----------------------|---------------------|
| 1    | 4315,15 <sup>a</sup> | ,055                 | ,167                |

a. Estimation terminated at iteration number 20 because maximum iterations has been reached. Final solution cannot be found.

### Classification Table<sup>a</sup>

| Observed           |                             | Predicted                   |                      |                    |       |
|--------------------|-----------------------------|-----------------------------|----------------------|--------------------|-------|
|                    |                             | dod01 dödsfall ja eller nej |                      | Percentage Correct |       |
|                    |                             | 0 inget dödsfall            | 1 minst ett dödsfall |                    |       |
| Step 1             | dod01 dödsfall ja eller nej | 0 inget dödsfall            | 11839                | 0                  | 100,0 |
|                    |                             | 1 minst ett dödsfall        | 636                  | 0                  | ,0    |
| Overall Percentage |                             |                             |                      |                    | 94,9  |

a. The cut value is ,500



**Variables in the Equation**

|                         | B       | S.E.     | Wald    | df | Sig. | Exp(B) | 95% C.I. |
|-------------------------|---------|----------|---------|----|------|--------|----------|
|                         |         |          |         |    |      |        | Lower    |
| Step 1 <sup>a</sup> sv3 |         |          | 7,118   | 2  | ,028 |        |          |
| sv3(1)                  | -,161   | ,116     | 1,927   | 1  | ,165 | ,851   | ,679     |
| sv3(2)                  | ,174    | ,110     | 2,506   | 1  | ,113 | 1,190  | ,959     |
| VASTY2                  |         |          | 219,886 | 35 | ,000 |        |          |
| VASTY2(1)               | ,572    | ,344     | 2,770   | 1  | ,096 | 1,771  | ,903     |
| VASTY2(2)               | ,654    | ,338     | 3,741   | 1  | ,053 | 1,923  | ,991     |
| VASTY2(3)               | ,884    | ,331     | 7,116   | 1  | ,008 | 2,421  | 1,264    |
| VASTY2(4)               | ,232    | ,369     | ,395    | 1  | ,529 | 1,261  | ,612     |
| VASTY2(5)               | -,675   | ,496     | 1,854   | 1  | ,173 | ,509   | ,193     |
| VASTY2(6)               | -18,126 | 2105,897 | ,000    | 1  | ,993 | ,000   | ,000     |
| VASTY2(7)               | 1,739   | ,306     | 32,391  | 1  | ,000 | 5,690  | 3,127    |
| VASTY2(8)               | ,911    | ,332     | 7,529   | 1  | ,006 | 2,487  | 1,297    |
| VASTY2(9)               | ,391    | ,361     | 1,172   | 1  | ,279 | 1,478  | ,729     |
| VASTY2(10)              | ,669    | ,338     | 3,920   | 1  | ,048 | 1,952  | 1,007    |
| VASTY2(11)              | ,381    | ,357     | 1,142   | 1  | ,285 | 1,464  | ,728     |
| VASTY2(12)              | 1,196   | ,318     | 14,164  | 1  | ,000 | 3,305  | 1,773    |
| VASTY2(13)              | 1,407   | ,314     | 20,080  | 1  | ,000 | 4,085  | 2,207    |
| VASTY2(14)              | ,725    | ,335     | 4,695   | 1  | ,030 | 2,065  | 1,072    |
| VASTY2(15)              | ,083    | ,372     | ,050    | 1  | ,824 | 1,086  | ,524     |
| VASTY2(16)              | -,855   | ,644     | 1,763   | 1  | ,184 | ,425   | ,121     |
| VASTY2(17)              | -17,931 | 2101,558 | ,000    | 1  | ,993 | ,000   | ,000     |
| VASTY2(18)              | -2,502  | 1,041    | 5,779   | 1  | ,016 | ,082   | ,011     |
| VASTY2(19)              | -2,510  | 1,041    | 5,812   | 1  | ,016 | ,081   | ,011     |
| VASTY2(20)              | -1,444  | ,642     | 5,055   | 1  | ,025 | ,236   | ,067     |
| VASTY2(21)              | ,617    | ,345     | 3,193   | 1  | ,074 | 1,854  | ,942     |
| VASTY2(22)              | 1,126   | ,320     | 12,383  | 1  | ,000 | 3,084  | 1,647    |
| VASTY2(23)              | ,551    | ,348     | 2,512   | 1  | ,113 | 1,735  | ,878     |
| VASTY2(24)              | 1,418   | ,311     | 20,832  | 1  | ,000 | 4,129  | 2,246    |
| VASTY2(25)              | -,153   | ,436     | ,123    | 1  | ,726 | ,858   | ,365     |
| VASTY2(26)              | -17,994 | 2353,533 | ,000    | 1  | ,994 | ,000   | ,000     |
| VASTY2(27)              | -18,075 | 2099,032 | ,000    | 1  | ,993 | ,000   | ,000     |
| VASTY2(28)              | -18,145 | 2679,357 | ,000    | 1  | ,995 | ,000   | ,000     |
| VASTY2(29)              | -18,150 | 2100,910 | ,000    | 1  | ,993 | ,000   | ,000     |
| VASTY2(30)              | ,067    | ,387     | ,030    | 1  | ,862 | 1,069  | ,501     |
| VASTY2(31)              | -17,833 | 2100,466 | ,000    | 1  | ,993 | ,000   | ,000     |
| VASTY2(32)              | -1,800  | ,764     | 5,550   | 1  | ,018 | ,165   | ,037     |
| VASTY2(33)              | -2,504  | 1,041    | 5,787   | 1  | ,016 | ,082   | ,011     |
| VASTY2(34)              | ,484    | ,350     | 1,910   | 1  | ,167 | 1,623  | ,817     |
| VASTY2(35)              | -17,998 | 2261,672 | ,000    | 1  | ,994 | ,000   | ,000     |
| Constant                | -3,227  | ,277     | 135,542 | 1  | ,000 | ,040   |          |

Variables in the Equation

|                     |            | 95% C.I... |
|---------------------|------------|------------|
|                     |            | Upper      |
| Step 1 <sup>a</sup> | sv3        |            |
|                     | sv3(1)     | 1,068      |
|                     | sv3(2)     | 1,476      |
|                     | VASTY2     |            |
|                     | VASTY2(1)  | 3,473      |
|                     | VASTY2(2)  | 3,729      |
|                     | VASTY2(3)  | 4,635      |
|                     | VASTY2(4)  | 2,601      |
|                     | VASTY2(5)  | 1,345      |
|                     | VASTY2(6)  | .          |
|                     | VASTY2(7)  | 10,355     |
|                     | VASTY2(8)  | 4,769      |
|                     | VASTY2(9)  | 2,997      |
|                     | VASTY2(10) | 3,784      |
|                     | VASTY2(11) | 2,946      |
|                     | VASTY2(12) | 6,161      |
|                     | VASTY2(13) | 7,561      |
|                     | VASTY2(14) | 3,979      |
|                     | VASTY2(15) | 2,254      |
|                     | VASTY2(16) | 1,502      |
|                     | VASTY2(17) | .          |
|                     | VASTY2(18) | ,630       |
|                     | VASTY2(19) | ,625       |
|                     | VASTY2(20) | ,831       |
|                     | VASTY2(21) | 3,649      |
|                     | VASTY2(22) | 5,776      |
|                     | VASTY2(23) | 3,430      |
|                     | VASTY2(24) | 7,592      |
|                     | VASTY2(25) | 2,015      |
|                     | VASTY2(26) | .          |
|                     | VASTY2(27) | .          |
|                     | VASTY2(28) | .          |
|                     | VASTY2(29) | .          |
|                     | VASTY2(30) | 2,282      |
|                     | VASTY2(31) | .          |
|                     | VASTY2(32) | ,739       |
|                     | VASTY2(33) | ,629       |
|                     | VASTY2(34) | 3,226      |
|                     | VASTY2(35) | .          |
|                     | Constant   |            |

a. Variable(s) entered on step 1: sv3, VASTY2.

```

LOGISTIC REGRESSION VARIABLES dod01
/METHOD=ENTER sv5 VASTY2
/CONTRAST (sv5)=Indicator(1)
/CONTRAST (VASTY2)=Indicator(1)
/PRINT=CI(95)
/CRITERIA=PIN(0.05) POUT(0.10) ITERATE(20) CUT(0.5).

```

## Block 1: Method = Enter

### Omnibus Tests of Model Coefficients

|        |       | Chi-square | df | Sig. |
|--------|-------|------------|----|------|
| Step 1 | Step  | 709,941    | 39 | ,000 |
|        | Block | 709,941    | 39 | ,000 |
|        | Model | 709,941    | 39 | ,000 |

### Model Summary

| Step | -2 Log likelihood    | Cox & Snell R Square | Nagelkerke R Square |
|------|----------------------|----------------------|---------------------|
| 1    | 4314,90 <sup>a</sup> | ,055                 | ,167                |

a. Estimation terminated at iteration number 20 because maximum iterations has been reached. Final solution cannot be found.

### Classification Table<sup>a</sup>

| Observed           |                             | Predicted                   |                      |                    |       |
|--------------------|-----------------------------|-----------------------------|----------------------|--------------------|-------|
|                    |                             | dod01 dödsfall ja eller nej |                      | Percentage Correct |       |
|                    |                             | 0 inget dödsfall            | 1 minst ett dödsfall |                    |       |
| Step 1             | dod01 dödsfall ja eller nej | 0 inget dödsfall            | 11839                | 0                  | 100,0 |
|                    |                             | 1 minst ett dödsfall        | 636                  | 0                  | ,0    |
| Overall Percentage |                             |                             |                      |                    | 94,9  |

a. The cut value is ,500

**Variables in the Equation**

|                     |            | B       | S.E.     | Wald    | df | Sig. | Exp(B) | 95% C.I. |
|---------------------|------------|---------|----------|---------|----|------|--------|----------|
|                     |            |         |          |         |    |      |        | Lower    |
| Step 1 <sup>a</sup> | sv5        |         |          | 7,325   | 4  | ,120 |        |          |
|                     | sv5(1)     | -,200   | ,152     | 1,738   | 1  | ,187 | ,819   | ,608     |
|                     | sv5(2)     | -,073   | ,144     | ,257    | 1  | ,612 | ,929   | ,700     |
|                     | sv5(3)     | ,089    | ,129     | ,476    | 1  | ,490 | 1,093  | ,849     |
|                     | sv5(4)     | ,225    | ,146     | 2,397   | 1  | ,122 | 1,253  | ,942     |
|                     | VASTY2     |         |          | 215,509 | 35 | ,000 |        |          |
|                     | VASTY2(1)  | ,573    | ,344     | 2,776   | 1  | ,096 | 1,773  | ,904     |
|                     | VASTY2(2)  | ,629    | ,341     | 3,407   | 1  | ,065 | 1,875  | ,962     |
|                     | VASTY2(3)  | ,877    | ,331     | 7,006   | 1  | ,008 | 2,404  | 1,256    |
|                     | VASTY2(4)  | ,235    | ,369     | ,405    | 1  | ,524 | 1,265  | ,614     |
|                     | VASTY2(5)  | -,677   | ,496     | 1,867   | 1  | ,172 | ,508   | ,192     |
|                     | VASTY2(6)  | -18,169 | 2105,569 | ,000    | 1  | ,993 | ,000   | ,000     |
|                     | VASTY2(7)  | 1,733   | ,305     | 32,197  | 1  | ,000 | 5,659  | 3,110    |
|                     | VASTY2(8)  | ,908    | ,332     | 7,458   | 1  | ,006 | 2,479  | 1,292    |
|                     | VASTY2(9)  | ,388    | ,361     | 1,159   | 1  | ,282 | 1,475  | ,727     |
|                     | VASTY2(10) | ,640    | ,341     | 3,517   | 1  | ,061 | 1,896  | ,972     |
|                     | VASTY2(11) | ,375    | ,357     | 1,107   | 1  | ,293 | 1,456  | ,723     |
|                     | VASTY2(12) | 1,184   | ,319     | 13,807  | 1  | ,000 | 3,266  | 1,749    |
|                     | VASTY2(13) | 1,379   | ,318     | 18,824  | 1  | ,000 | 3,970  | 2,129    |
|                     | VASTY2(14) | ,711    | ,336     | 4,486   | 1  | ,034 | 2,037  | 1,054    |
|                     | VASTY2(15) | ,067    | ,374     | ,032    | 1  | ,858 | 1,069  | ,514     |
|                     | VASTY2(16) | -,870   | ,644     | 1,822   | 1  | ,177 | ,419   | ,119     |
|                     | VASTY2(17) | -17,930 | 2101,497 | ,000    | 1  | ,993 | ,000   | ,000     |
|                     | VASTY2(18) | -2,472  | 1,044    | 5,611   | 1  | ,018 | ,084   | ,011     |
|                     | VASTY2(19) | -2,476  | 1,044    | 5,626   | 1  | ,018 | ,084   | ,011     |
|                     | VASTY2(20) | -1,467  | ,643     | 5,197   | 1  | ,023 | ,231   | ,065     |
|                     | VASTY2(21) | ,613    | ,346     | 3,145   | 1  | ,076 | 1,846  | ,938     |
|                     | VASTY2(22) | 1,123   | ,320     | 12,309  | 1  | ,000 | 3,074  | 1,642    |
|                     | VASTY2(23) | ,551    | ,348     | 2,511   | 1  | ,113 | 1,735  | ,878     |
|                     | VASTY2(24) | 1,407   | ,311     | 20,437  | 1  | ,000 | 4,083  | 2,219    |
|                     | VASTY2(25) | -,154   | ,436     | ,125    | 1  | ,723 | ,857   | ,365     |
|                     | VASTY2(26) | -17,995 | 2353,519 | ,000    | 1  | ,994 | ,000   | ,000     |
|                     | VASTY2(27) | -18,092 | 2098,489 | ,000    | 1  | ,993 | ,000   | ,000     |
|                     | VASTY2(28) | -18,197 | 2679,174 | ,000    | 1  | ,995 | ,000   | ,000     |
|                     | VASTY2(29) | -18,205 | 2100,873 | ,000    | 1  | ,993 | ,000   | ,000     |
|                     | VASTY2(30) | ,068    | ,387     | ,031    | 1  | ,860 | 1,071  | ,502     |
|                     | VASTY2(31) | -17,813 | 2100,234 | ,000    | 1  | ,993 | ,000   | ,000     |
|                     | VASTY2(32) | -1,771  | ,767     | 5,323   | 1  | ,021 | ,170   | ,038     |
|                     | VASTY2(33) | -2,471  | 1,044    | 5,601   | 1  | ,018 | ,085   | ,011     |
|                     | VASTY2(34) | ,480    | ,350     | 1,879   | 1  | ,170 | 1,617  | ,813     |
|                     | VASTY2(35) | -17,988 | 2261,427 | ,000    | 1  | ,994 | ,000   | ,000     |
|                     | Constant   | -3,221  | ,284     | 128,279 | 1  | ,000 | ,040   |          |

Variables in the Equation

|                     |            | 95% C.I... |
|---------------------|------------|------------|
|                     |            | Upper      |
| Step 1 <sup>a</sup> | sv5        |            |
|                     | sv5(1)     | 1,102      |
|                     | sv5(2)     | 1,233      |
|                     | sv5(3)     | 1,408      |
|                     | sv5(4)     | 1,666      |
|                     | VASTY2     |            |
|                     | VASTY2(1)  | 3,477      |
|                     | VASTY2(2)  | 3,656      |
|                     | VASTY2(3)  | 4,602      |
|                     | VASTY2(4)  | 2,608      |
|                     | VASTY2(5)  | 1,342      |
|                     | VASTY2(6)  | .          |
|                     | VASTY2(7)  | 10,297     |
|                     | VASTY2(8)  | 4,756      |
|                     | VASTY2(9)  | 2,990      |
|                     | VASTY2(10) | 3,701      |
|                     | VASTY2(11) | 2,929      |
|                     | VASTY2(12) | 6,098      |
|                     | VASTY2(13) | 7,400      |
|                     | VASTY2(14) | 3,934      |
|                     | VASTY2(15) | 2,226      |
|                     | VASTY2(16) | 1,482      |
|                     | VASTY2(17) | .          |
|                     | VASTY2(18) | ,653       |
|                     | VASTY2(19) | ,650       |
|                     | VASTY2(20) | ,814       |
|                     | VASTY2(21) | 3,633      |
|                     | VASTY2(22) | 5,757      |
|                     | VASTY2(23) | 3,431      |
|                     | VASTY2(24) | 7,513      |
|                     | VASTY2(25) | 2,014      |
|                     | VASTY2(26) | .          |
|                     | VASTY2(27) | .          |
|                     | VASTY2(28) | .          |
|                     | VASTY2(29) | .          |
|                     | VASTY2(30) | 2,285      |
|                     | VASTY2(31) | .          |
|                     | VASTY2(32) | ,766       |
|                     | VASTY2(33) | ,654       |
|                     | VASTY2(34) | 3,212      |
|                     | VASTY2(35) | .          |
|                     | Constant   |            |

a. Variable(s) entered on step 1: sv5, VASTY2.

```
LOGISTIC REGRESSION VARIABLES dod01
/METHOD=ENTER sv7 VASTY2
/CONTRAST (sv7)=Indicator(1)
/CONTRAST (VASTY2)=Indicator(1)
/PRINT=CI(95)
/CRITERIA=PIN(0.05) POUT(0.10) ITERATE(20) CUT(0.5).
```

## Block 1: Method = Enter

### Omnibus Tests of Model Coefficients

|        |       | Chi-square | df | Sig. |
|--------|-------|------------|----|------|
| Step 1 | Step  | 716,984    | 41 | ,000 |
|        | Block | 716,984    | 41 | ,000 |
|        | Model | 716,984    | 41 | ,000 |

### Model Summary

| Step | -2 Log likelihood    | Cox & Snell R Square | Nagelkerke R Square |
|------|----------------------|----------------------|---------------------|
| 1    | 4307,86 <sup>a</sup> | ,056                 | ,168                |

a. Estimation terminated at iteration number 20 because maximum iterations has been reached. Final solution cannot be found.

### Classification Table<sup>a</sup>

| Observed           |                             |                      | Predicted                   |                      |                    |
|--------------------|-----------------------------|----------------------|-----------------------------|----------------------|--------------------|
|                    |                             |                      | dod01 dödsfall ja eller nej |                      | Percentage Correct |
|                    |                             |                      | 0 inget dödsfall            | 1 minst ett dödsfall |                    |
| Step 1             | dod01 dödsfall ja eller nej | 0 inget dödsfall     | 11839                       | 0                    | 100,0              |
|                    |                             | 1 minst ett dödsfall | 636                         | 0                    | ,0                 |
| Overall Percentage |                             |                      |                             |                      | 94,9               |

a. The cut value is ,500

**Variables in the Equation**

|                         | B       | S.E.     | Wald    | df | Sig. | Exp(B) | 95% C.I. |
|-------------------------|---------|----------|---------|----|------|--------|----------|
|                         |         |          |         |    |      |        | Lower    |
| Step 1 <sup>a</sup> sv7 |         |          | 13,618  | 6  | ,034 |        |          |
| sv7(1)                  | -,355   | ,189     | 3,510   | 1  | ,061 | ,701   | ,484     |
| sv7(2)                  | ,155    | ,168     | ,847    | 1  | ,357 | 1,167  | ,840     |
| sv7(3)                  | -,016   | ,169     | ,009    | 1  | ,922 | ,984   | ,707     |
| sv7(4)                  | ,131    | ,155     | ,715    | 1  | ,398 | 1,140  | ,841     |
| sv7(5)                  | ,222    | ,151     | 2,168   | 1  | ,141 | 1,249  | ,929     |
| sv7(6)                  | ,327    | ,175     | 3,490   | 1  | ,062 | 1,387  | ,984     |
| VASTY2                  |         |          | 208,518 | 35 | ,000 |        |          |
| VASTY2(1)               | ,570    | ,344     | 2,746   | 1  | ,097 | 1,769  | ,901     |
| VASTY2(2)               | ,616    | ,341     | 3,253   | 1  | ,071 | 1,851  | ,948     |
| VASTY2(3)               | ,867    | ,332     | 6,833   | 1  | ,009 | 2,380  | 1,242    |
| VASTY2(4)               | ,219    | ,370     | ,353    | 1  | ,553 | 1,245  | ,604     |
| VASTY2(5)               | -,660   | ,496     | 1,769   | 1  | ,183 | ,517   | ,196     |
| VASTY2(6)               | -18,205 | 2105,313 | ,000    | 1  | ,993 | ,000   | ,000     |
| VASTY2(7)               | 1,744   | ,306     | 32,553  | 1  | ,000 | 5,717  | 3,141    |
| VASTY2(8)               | ,893    | ,333     | 7,212   | 1  | ,007 | 2,444  | 1,273    |
| VASTY2(9)               | ,388    | ,361     | 1,158   | 1  | ,282 | 1,475  | ,727     |
| VASTY2(10)              | ,622    | ,342     | 3,304   | 1  | ,069 | 1,862  | ,953     |
| VASTY2(11)              | ,398    | ,357     | 1,243   | 1  | ,265 | 1,489  | ,739     |
| VASTY2(12)              | 1,175   | ,318     | 13,619  | 1  | ,000 | 3,239  | 1,735    |
| VASTY2(13)              | 1,360   | ,319     | 18,196  | 1  | ,000 | 3,897  | 2,086    |
| VASTY2(14)              | ,706    | ,336     | 4,415   | 1  | ,036 | 2,027  | 1,049    |
| VASTY2(15)              | ,050    | ,375     | ,018    | 1  | ,893 | 1,052  | ,504     |
| VASTY2(16)              | -,873   | ,645     | 1,833   | 1  | ,176 | ,418   | ,118     |
| VASTY2(17)              | -17,928 | 2097,570 | ,000    | 1  | ,993 | ,000   | ,000     |
| VASTY2(18)              | -2,286  | 1,047    | 4,773   | 1  | ,029 | ,102   | ,013     |
| VASTY2(19)              | -2,263  | 1,048    | 4,660   | 1  | ,031 | ,104   | ,013     |
| VASTY2(20)              | -1,475  | ,644     | 5,243   | 1  | ,022 | ,229   | ,065     |
| VASTY2(21)              | ,616    | ,346     | 3,181   | 1  | ,074 | 1,852  | ,941     |
| VASTY2(22)              | 1,118   | ,320     | 12,203  | 1  | ,000 | 3,060  | 1,634    |
| VASTY2(23)              | ,564    | ,348     | 2,631   | 1  | ,105 | 1,758  | ,889     |
| VASTY2(24)              | 1,397   | ,311     | 20,135  | 1  | ,000 | 4,044  | 2,197    |
| VASTY2(25)              | -,146   | ,436     | ,113    | 1  | ,737 | ,864   | ,368     |
| VASTY2(26)              | -17,989 | 2350,865 | ,000    | 1  | ,994 | ,000   | ,000     |
| VASTY2(27)              | -18,112 | 2097,325 | ,000    | 1  | ,993 | ,000   | ,000     |
| VASTY2(28)              | -18,236 | 2678,872 | ,000    | 1  | ,995 | ,000   | ,000     |
| VASTY2(29)              | -18,246 | 2100,824 | ,000    | 1  | ,993 | ,000   | ,000     |
| VASTY2(30)              | ,059    | ,387     | ,023    | 1  | ,879 | 1,061  | ,497     |
| VASTY2(31)              | -17,707 | 2095,196 | ,000    | 1  | ,993 | ,000   | ,000     |
| VASTY2(32)              | -1,586  | ,772     | 4,227   | 1  | ,040 | ,205   | ,045     |
| VASTY2(33)              | -2,258  | 1,048    | 4,637   | 1  | ,031 | ,105   | ,013     |
| VASTY2(34)              | ,474    | ,351     | 1,830   | 1  | ,176 | 1,607  | ,808     |

Variables in the Equation

|                     |            | 95% C.I... |
|---------------------|------------|------------|
|                     |            | Upper      |
| Step 1 <sup>a</sup> | sv7        |            |
|                     | sv7(1)     | 1,017      |
|                     | sv7(2)     | 1,623      |
|                     | sv7(3)     | 1,369      |
|                     | sv7(4)     | 1,544      |
|                     | sv7(5)     | 1,678      |
|                     | sv7(6)     | 1,954      |
|                     | VASTY2     |            |
|                     | VASTY2(1)  | 3,472      |
|                     | VASTY2(2)  | 3,613      |
|                     | VASTY2(3)  | 4,559      |
|                     | VASTY2(4)  | 2,569      |
|                     | VASTY2(5)  | 1,367      |
|                     | VASTY2(6)  | .          |
|                     | VASTY2(7)  | 10,407     |
|                     | VASTY2(8)  | 4,691      |
|                     | VASTY2(9)  | 2,992      |
|                     | VASTY2(10) | 3,642      |
|                     | VASTY2(11) | 3,000      |
|                     | VASTY2(12) | 6,046      |
|                     | VASTY2(13) | 7,281      |
|                     | VASTY2(14) | 3,917      |
|                     | VASTY2(15) | 2,193      |
|                     | VASTY2(16) | 1,479      |
|                     | VASTY2(17) | .          |
|                     | VASTY2(18) | ,790       |
|                     | VASTY2(19) | ,812       |
|                     | VASTY2(20) | ,809       |
|                     | VASTY2(21) | 3,646      |
|                     | VASTY2(22) | 5,732      |
|                     | VASTY2(23) | 3,478      |
|                     | VASTY2(24) | 7,444      |
|                     | VASTY2(25) | 2,031      |
|                     | VASTY2(26) | .          |
|                     | VASTY2(27) | .          |
|                     | VASTY2(28) | .          |
|                     | VASTY2(29) | .          |
|                     | VASTY2(30) | 2,264      |
|                     | VASTY2(31) | .          |
|                     | VASTY2(32) | ,929       |
|                     | VASTY2(33) | ,816       |
|                     | VASTY2(34) | 3,194      |



**Variables in the Equation**

|            | B       | S.E.     | Wald    | df | Sig. | Exp(B) | 95% C.I. |
|------------|---------|----------|---------|----|------|--------|----------|
|            |         |          |         |    |      |        | Lower    |
| VASTY2(35) | -17,967 | 2257,374 | ,000    | 1  | ,994 | ,000   | ,000     |
| Constant   | -3,279  | ,291     | 127,145 | 1  | ,000 | ,038   |          |

**Variables in the Equation**

|            | 95% C.I... |
|------------|------------|
|            | Upper      |
| VASTY2(35) | .          |
| Constant   |            |

a. Variable(s) entered on step 1: sv7, VASTY2.

COMMENT körs på abo\_bjo\_vasa\_v1.sav

COMMENT med kontroll för VASTY2, weekday, holiday, season

COMMENT läses i Table 2 som första kolumnen, sex modeller, andra kolumnen, sex modeller, osv

COMMENT till Table 4 läses modellerna 1,7,13,19,25

\*\*

LOGISTIC REGRESSION VARIABLES hand01

```
/METHOD=ENTER bv1 VASTY2 weekday holiday season  
/CONTRAST (bv1)=Indicator(1)  
/CONTRAST (VASTY2)=Indicator(1)  
/CONTRAST (weekday)=Indicator(1)  
/CONTRAST (holiday)=Indicator(1)  
/CONTRAST (season)=Indicator(1)  
/PRINT=CI(95)  
/CRITERIA=PIN(0.05) POUT(0.10) ITERATE(20) CUT(0.5).
```

## Block 1: Method = Enter

### Omnibus Tests of Model Coefficients

|        |       | Chi-square | df | Sig. |
|--------|-------|------------|----|------|
| Step 1 | Step  | 612,758    | 48 | ,000 |
|        | Block | 612,758    | 48 | ,000 |
|        | Model | 612,758    | 48 | ,000 |

### Model Summary

| Step | -2 Log likelihood    | Cox & Snell R Square | Nagelkerke R Square |
|------|----------------------|----------------------|---------------------|
| 1    | 8010,82 <sup>a</sup> | ,048                 | ,096                |

a. Estimation terminated at iteration number 6 because parameter estimates changed by less than ,001.

Classification Table<sup>a</sup>

| Observed           |                              | Predicted                    |                     |                    |       |
|--------------------|------------------------------|------------------------------|---------------------|--------------------|-------|
|                    |                              | hand01 händelse nej eller ja |                     | Percentage Correct |       |
|                    |                              | 0 ingen händelse             | 1 minst en händelse |                    |       |
| Step 1             | hand01 händelse nej eller ja | 0 ingen händelse             | 11108               | 0                  | 100,0 |
|                    |                              | 1 minst en händelse          | 1367                | 0                  | ,0    |
| Overall Percentage |                              |                              |                     |                    | 89,0  |

a. The cut value is ,500

Variables in the Equation

|                         | B      | S.E. | Wald    | df | Sig. | Exp(B) | 95% C.I. for EXP(B) |       |
|-------------------------|--------|------|---------|----|------|--------|---------------------|-------|
|                         |        |      |         |    |      |        | Lower               | Upper |
| Step 1 <sup>a</sup> bv1 |        |      | 25,202  | 2  | ,000 |        |                     |       |
|                         | -,238  | ,085 | 7,908   | 1  | ,005 | ,788   | ,668                | ,930  |
|                         | ,213   | ,070 | 9,314   | 1  | ,002 | 1,237  | 1,079               | 1,418 |
| VASTY2                  |        |      | 436,249 | 35 | ,000 |        |                     |       |
| VASTY2(1)               | ,338   | ,240 | 1,977   | 1  | ,160 | 1,402  | ,875                | 2,245 |
| VASTY2(2)               | 1,195  | ,217 | 30,330  | 1  | ,000 | 3,303  | 2,159               | 5,054 |
| VASTY2(3)               | -,843  | ,304 | 7,692   | 1  | ,006 | ,431   | ,237                | ,781  |
| VASTY2(4)               | ,164   | ,244 | ,454    | 1  | ,501 | 1,178  | ,731                | 1,900 |
| VASTY2(5)               | -,386  | ,282 | 1,869   | 1  | ,172 | ,680   | ,391                | 1,182 |
| VASTY2(6)               | -1,046 | ,328 | 10,166  | 1  | ,001 | ,351   | ,185                | ,668  |
| VASTY2(7)               | 1,064  | ,221 | 23,198  | 1  | ,000 | 2,897  | 1,879               | 4,467 |
| VASTY2(8)               | ,264   | ,241 | 1,203   | 1  | ,273 | 1,302  | ,812                | 2,086 |
| VASTY2(9)               | ,188   | ,247 | ,582    | 1  | ,446 | 1,207  | ,744                | 1,958 |
| VASTY2(10)              | 1,022  | ,220 | 21,642  | 1  | ,000 | 2,779  | 1,807               | 4,275 |
| VASTY2(11)              | ,876   | ,223 | 15,386  | 1  | ,000 | 2,402  | 1,550               | 3,721 |
| VASTY2(12)              | ,081   | ,248 | ,105    | 1  | ,746 | 1,084  | ,666                | 1,764 |
| VASTY2(13)              | ,765   | ,225 | 11,565  | 1  | ,001 | 2,149  | 1,383               | 3,340 |
| VASTY2(14)              | -,291  | ,268 | 1,179   | 1  | ,278 | ,748   | ,442                | 1,264 |
| VASTY2(15)              | ,230   | ,242 | ,902    | 1  | ,342 | 1,259  | ,783                | 2,025 |
| VASTY2(16)              | ,258   | ,289 | ,794    | 1  | ,373 | 1,294  | ,734                | 2,280 |
| VASTY2(17)              | -1,183 | ,356 | 11,055  | 1  | ,001 | ,306   | ,152                | ,615  |
| VASTY2(18)              | -,880  | ,320 | 7,550   | 1  | ,006 | ,415   | ,221                | ,777  |
| VASTY2(19)              | -1,221 | ,387 | 9,977   | 1  | ,002 | ,295   | ,138                | ,629  |
| VASTY2(20)              | ,024   | ,262 | ,008    | 1  | ,927 | 1,024  | ,613                | 1,711 |
| VASTY2(21)              | -,182  | ,263 | ,481    | 1  | ,488 | ,833   | ,498                | 1,395 |
| VASTY2(22)              | ,150   | ,253 | ,351    | 1  | ,553 | 1,162  | ,708                | 1,907 |
| VASTY2(23)              | ,711   | ,228 | 9,706   | 1  | ,002 | 2,036  | 1,302               | 3,183 |
| VASTY2(24)              | ,529   | ,230 | 5,282   | 1  | ,022 | 1,698  | 1,081               | 2,667 |
| VASTY2(25)              | ,078   | ,265 | ,087    | 1  | ,768 | 1,081  | ,644                | 1,816 |

Variables in the Equation

|            | B      | S.E. | Wald    | df | Sig. | Exp(B) | 95% C.I. for EXP(B) |       |
|------------|--------|------|---------|----|------|--------|---------------------|-------|
|            |        |      |         |    |      |        | Lower               | Upper |
| VASTY2(26) | -.900  | ,337 | 7,120   | 1  | ,008 | ,407   | ,210                | ,788  |
| VASTY2(27) | -1,309 | ,356 | 13,477  | 1  | ,000 | ,270   | ,134                | ,543  |
| VASTY2(28) | -.959  | ,372 | 6,656   | 1  | ,010 | ,383   | ,185                | ,794  |
| VASTY2(29) | -.955  | ,320 | 8,898   | 1  | ,003 | ,385   | ,206                | ,721  |
| VASTY2(30) | -.011  | ,252 | ,002    | 1  | ,964 | ,989   | ,603                | 1,622 |
| VASTY2(31) | ,501   | ,234 | 4,596   | 1  | ,032 | 1,651  | 1,044               | 2,611 |
| VASTY2(32) | -.044  | ,260 | ,029    | 1  | ,864 | ,957   | ,575                | 1,592 |
| VASTY2(33) | -.030  | ,258 | ,013    | 1  | ,908 | ,971   | ,586                | 1,609 |
| VASTY2(34) | -1,577 | ,401 | 15,468  | 1  | ,000 | ,207   | ,094                | ,453  |
| VASTY2(35) | ,324   | ,245 | 1,752   | 1  | ,186 | 1,382  | ,856                | 2,232 |
| weekday    |        |      | 18,335  | 6  | ,005 |        |                     |       |
| weekday(1) | -.032  | ,107 | ,091    | 1  | ,763 | ,968   | ,784                | 1,195 |
| weekday(2) | -.064  | ,108 | ,349    | 1  | ,555 | ,938   | ,759                | 1,160 |
| weekday(3) | ,018   | ,107 | ,028    | 1  | ,867 | 1,018  | ,826                | 1,255 |
| weekday(4) | ,026   | ,107 | ,058    | 1  | ,810 | 1,026  | ,832                | 1,266 |
| weekday(5) | -.396  | ,119 | 11,109  | 1  | ,001 | ,673   | ,533                | ,850  |
| weekday(6) | ,050   | ,108 | ,212    | 1  | ,645 | 1,051  | ,850                | 1,299 |
| holiday(1) | -.468  | ,201 | 5,407   | 1  | ,020 | ,626   | ,422                | ,929  |
| season     |        |      | 13,381  | 4  | ,010 |        |                     |       |
| season(1)  | -.070  | ,092 | ,577    | 1  | ,448 | ,932   | ,778                | 1,117 |
| season(2)  | -.170  | ,088 | 3,763   | 1  | ,052 | ,843   | ,710                | 1,002 |
| season(3)  | ,162   | ,088 | 3,384   | 1  | ,066 | 1,176  | ,989                | 1,397 |
| season(4)  | -.024  | ,093 | ,065    | 1  | ,798 | ,976   | ,813                | 1,173 |
| Constant   | -2,147 | ,202 | 113,333 | 1  | ,000 | ,117   |                     |       |

a. Variable(s) entered on step 1: bv1, VASTY2, weekday, holiday, season.

```
LOGISTIC REGRESSION VARIABLES hand01
/METHOD=ENTER bv2 VASTY2 weekday holiday season
/CONTRAST (bv2)=Indicator(1)
/CONTRAST (VASTY2)=Indicator(1)
/CONTRAST (weekday)=Indicator(1)
/CONTRAST (holiday)=Indicator(1)
/CONTRAST (season)=Indicator(1)
/PRINT=CI(95)
/CRITERIA=PIN(0.05) POUT(0.10) ITERATE(20) CUT(0.5).
```

**Block 1: Method = Enter**

**Omnibus Tests of Model Coefficients**

|        |       | Chi-square | df | Sig. |
|--------|-------|------------|----|------|
| Step 1 | Step  | 602,362    | 48 | ,000 |
|        | Block | 602,362    | 48 | ,000 |
|        | Model | 602,362    | 48 | ,000 |

**Model Summary**

| Step | -2 Log likelihood    | Cox & Snell R Square | Nagelkerke R Square |
|------|----------------------|----------------------|---------------------|
| 1    | 8021,22 <sup>a</sup> | ,047                 | ,094                |

a. Estimation terminated at iteration number 6 because parameter estimates changed by less than ,001.

**Classification Table<sup>a</sup>**

| Observed           |                              | Predicted                    |                     |                    |       |
|--------------------|------------------------------|------------------------------|---------------------|--------------------|-------|
|                    |                              | hand01 händelse nej eller ja |                     | Percentage Correct |       |
|                    |                              | 0 ingen händelse             | 1 minst en händelse |                    |       |
| Step 1             | hand01 händelse nej eller ja | 0 ingen händelse             | 11108               | 0                  | 100,0 |
|                    |                              | 1 minst en händelse          | 1367                | 0                  | ,0    |
| Overall Percentage |                              |                              |                     |                    | 89,0  |

a. The cut value is ,500

**Variables in the Equation**

|                         | B      | S.E. | Wald    | df | Sig. | Exp(B) | 95% C.I. for EXP(B) |       |
|-------------------------|--------|------|---------|----|------|--------|---------------------|-------|
|                         |        |      |         |    |      |        | Lower               | Upper |
| Step 1 <sup>a</sup> bv2 |        |      | 14,998  | 2  | ,001 |        |                     |       |
| bv2(1)                  | -,159  | ,085 | 3,479   | 1  | ,062 | ,853   | ,722                | 1,008 |
| bv2(2)                  | ,136   | ,077 | 3,085   | 1  | ,079 | 1,145  | ,984                | 1,333 |
| VASTY2                  |        |      | 440,228 | 35 | ,000 |        |                     |       |
| VASTY2(1)               | ,331   | ,240 | 1,899   | 1  | ,168 | 1,392  | ,870                | 2,229 |
| VASTY2(2)               | 1,200  | ,217 | 30,618  | 1  | ,000 | 3,322  | 2,171               | 5,082 |
| VASTY2(3)               | -,796  | ,303 | 6,881   | 1  | ,009 | ,451   | ,249                | ,818  |
| VASTY2(4)               | ,197   | ,243 | ,656    | 1  | ,418 | 1,218  | ,756                | 1,962 |
| VASTY2(5)               | -,377  | ,282 | 1,783   | 1  | ,182 | ,686   | ,395                | 1,193 |
| VASTY2(6)               | -1,012 | ,328 | 9,524   | 1  | ,002 | ,364   | ,191                | ,691  |
| VASTY2(7)               | 1,113  | ,220 | 25,627  | 1  | ,000 | 3,044  | 1,978               | 4,684 |
| VASTY2(8)               | ,273   | ,241 | 1,287   | 1  | ,257 | 1,314  | ,820                | 2,106 |
| VASTY2(9)               | ,203   | ,247 | ,677    | 1  | ,411 | 1,225  | ,755                | 1,987 |
| VASTY2(10)              | 1,034  | ,220 | 22,142  | 1  | ,000 | 2,812  | 1,828               | 4,326 |
| VASTY2(11)              | ,887   | ,223 | 15,800  | 1  | ,000 | 2,428  | 1,568               | 3,759 |
| VASTY2(12)              | ,093   | ,248 | ,141    | 1  | ,707 | 1,098  | ,675                | 1,786 |
| VASTY2(13)              | ,794   | ,225 | 12,453  | 1  | ,000 | 2,212  | 1,423               | 3,438 |
| VASTY2(14)              | -,275  | ,268 | 1,052   | 1  | ,305 | ,760   | ,449                | 1,284 |
| VASTY2(15)              | ,234   | ,243 | ,932    | 1  | ,334 | 1,264  | ,786                | 2,033 |
| VASTY2(16)              | ,268   | ,289 | ,859    | 1  | ,354 | 1,307  | ,742                | 2,301 |
| VASTY2(17)              | -1,179 | ,356 | 10,983  | 1  | ,001 | ,308   | ,153                | ,618  |
| VASTY2(18)              | -,878  | ,320 | 7,519   | 1  | ,006 | ,416   | ,222                | ,779  |
| VASTY2(19)              | -1,280 | ,385 | 11,041  | 1  | ,001 | ,278   | ,131                | ,592  |
| VASTY2(20)              | ,052   | ,261 | ,040    | 1  | ,842 | 1,053  | ,631                | 1,758 |
| VASTY2(21)              | -,174  | ,263 | ,436    | 1  | ,509 | ,841   | ,502                | 1,408 |
| VASTY2(22)              | ,141   | ,253 | ,313    | 1  | ,576 | 1,152  | ,702                | 1,891 |
| VASTY2(23)              | ,703   | ,228 | 9,503   | 1  | ,002 | 2,019  | 1,292               | 3,157 |
| VASTY2(24)              | ,563   | ,230 | 5,983   | 1  | ,014 | 1,756  | 1,118               | 2,758 |
| VASTY2(25)              | ,079   | ,265 | ,090    | 1  | ,764 | 1,083  | ,645                | 1,819 |
| VASTY2(26)              | -,888  | ,337 | 6,946   | 1  | ,008 | ,411   | ,212                | ,796  |
| VASTY2(27)              | -1,290 | ,356 | 13,101  | 1  | ,000 | ,275   | ,137                | ,554  |
| VASTY2(28)              | -,948  | ,372 | 6,510   | 1  | ,011 | ,387   | ,187                | ,803  |
| VASTY2(29)              | -,936  | ,320 | 8,560   | 1  | ,003 | ,392   | ,209                | ,734  |
| VASTY2(30)              | ,004   | ,252 | ,000    | 1  | ,987 | 1,004  | ,612                | 1,647 |
| VASTY2(31)              | ,510   | ,233 | 4,771   | 1  | ,029 | 1,665  | 1,054               | 2,630 |
| VASTY2(32)              | -,052  | ,259 | ,040    | 1  | ,841 | ,949   | ,571                | 1,579 |
| VASTY2(33)              | -,033  | ,257 | ,016    | 1  | ,898 | ,968   | ,584                | 1,602 |
| VASTY2(34)              | -1,567 | ,401 | 15,279  | 1  | ,000 | ,209   | ,095                | ,458  |
| VASTY2(35)              | ,365   | ,244 | 2,239   | 1  | ,135 | 1,440  | ,893                | 2,322 |
| weekday                 |        |      | 18,655  | 6  | ,005 |        |                     |       |
| weekday(1)              | -,027  | ,107 | ,065    | 1  | ,799 | ,973   | ,788                | 1,201 |
| weekday(2)              | -,060  | ,108 | ,311    | 1  | ,577 | ,942   | ,762                | 1,164 |

**Variables in the Equation**

|            | B      | S.E. | Wald    | df | Sig. | Exp(B) | 95% C.I. for EXP(B) |       |
|------------|--------|------|---------|----|------|--------|---------------------|-------|
|            |        |      |         |    |      |        | Lower               | Upper |
| weekday(3) | ,021   | ,107 | ,040    | 1  | ,842 | 1,022  | ,829                | 1,259 |
| weekday(4) | ,021   | ,107 | ,039    | 1  | ,844 | 1,021  | ,828                | 1,260 |
| weekday(5) | -,401  | ,119 | 11,402  | 1  | ,001 | ,670   | ,531                | ,845  |
| weekday(6) | ,047   | ,108 | ,189    | 1  | ,664 | 1,048  | ,848                | 1,296 |
| holiday(1) | -,472  | ,201 | 5,496   | 1  | ,019 | ,624   | ,420                | ,926  |
| season     |        |      | 13,991  | 4  | ,007 |        |                     |       |
| season(1)  | -,076  | ,092 | ,676    | 1  | ,411 | ,927   | ,774                | 1,111 |
| season(2)  | -,188  | ,088 | 4,572   | 1  | ,032 | ,829   | ,698                | ,984  |
| season(3)  | ,152   | ,088 | 3,004   | 1  | ,083 | 1,165  | ,980                | 1,383 |
| season(4)  | -,031  | ,093 | ,109    | 1  | ,741 | ,970   | ,808                | 1,164 |
| Constant   | -2,144 | ,206 | 108,644 | 1  | ,000 | ,117   |                     |       |

a. Variable(s) entered on step 1: bv2, VASTY2, weekday, holiday, season.

```
LOGISTIC REGRESSION VARIABLES hand01
/METHOD=ENTER bv3 VASTY2 weekday holiday season
/CONTRAST (bv3)=Indicator(1)
/CONTRAST (VASTY2)=Indicator(1)
/CONTRAST (weekday)=Indicator(1)
/CONTRAST (holiday)=Indicator(1)
/CONTRAST (season)=Indicator(1)
/PRINT=CI(95)
/CRITERIA=PIN(0.05) POUT(0.10) ITERATE(20) CUT(0.5).
```

**Block 1: Method = Enter**

**Omnibus Tests of Model Coefficients**

|        |       | Chi-square | df | Sig. |
|--------|-------|------------|----|------|
| Step 1 | Step  | 605,724    | 48 | ,000 |
|        | Block | 605,724    | 48 | ,000 |
|        | Model | 605,724    | 48 | ,000 |

**Model Summary**

| Step | -2 Log likelihood    | Cox & Snell R Square | Nagelkerke R Square |
|------|----------------------|----------------------|---------------------|
| 1    | 8017,86 <sup>a</sup> | ,047                 | ,095                |

a. Estimation terminated at iteration number 6 because parameter estimates changed by less than ,001.

**Classification Table<sup>a</sup>**

| Observed           |                              | Predicted                    |                     |                    |       |
|--------------------|------------------------------|------------------------------|---------------------|--------------------|-------|
|                    |                              | hand01 händelse nej eller ja |                     | Percentage Correct |       |
|                    |                              | 0 ingen händelse             | 1 minst en händelse |                    |       |
| Step 1             | hand01 händelse nej eller ja | 0 ingen händelse             | 11108               | 0                  | 100,0 |
|                    |                              | 1 minst en händelse          | 1367                | 0                  | ,0    |
| Overall Percentage |                              |                              |                     |                    | 89,0  |

a. The cut value is ,500

**Variables in the Equation**

|                     | B     | S.E. | Wald    | df | Sig. | Exp(B) | 95% C.I. for EXP(B) |       |
|---------------------|-------|------|---------|----|------|--------|---------------------|-------|
|                     |       |      |         |    |      |        | Lower               | Upper |
| Step 1 <sup>a</sup> |       |      |         |    |      |        |                     |       |
| bv3                 |       |      | 17,452  | 2  | ,000 |        |                     |       |
| bv3(1)              | -,418 | ,119 | 12,448  | 1  | ,000 | ,658   | ,522                | ,830  |
| bv3(2)              | ,156  | ,085 | 3,381   | 1  | ,066 | 1,168  | ,990                | 1,379 |
| VASTY2              |       |      | 440,036 | 35 | ,000 |        |                     |       |
| VASTY2(1)           | ,378  | ,240 | 2,474   | 1  | ,116 | 1,459  | ,911                | 2,337 |
| VASTY2(2)           | 1,224 | ,217 | 31,883  | 1  | ,000 | 3,400  | 2,223               | 5,199 |
| VASTY2(3)           | -,769 | ,304 | 6,424   | 1  | ,011 | ,463   | ,256                | ,840  |
| VASTY2(4)           | ,221  | ,244 | ,822    | 1  | ,365 | 1,247  | ,774                | 2,010 |
| VASTY2(5)           | -,351 | ,282 | 1,551   | 1  | ,213 | ,704   | ,405                | 1,223 |
| VASTY2(6)           | -,992 | ,328 | 9,142   | 1  | ,002 | ,371   | ,195                | ,705  |
| VASTY2(7)           | 1,128 | ,222 | 25,748  | 1  | ,000 | 3,091  | 1,999               | 4,780 |
| VASTY2(8)           | ,309  | ,240 | 1,658   | 1  | ,198 | 1,362  | ,851                | 2,181 |
| VASTY2(9)           | ,244  | ,246 | ,979    | 1  | ,322 | 1,276  | ,787                | 2,067 |
| VASTY2(10)          | 1,059 | ,219 | 23,324  | 1  | ,000 | 2,883  | 1,876               | 4,432 |
| VASTY2(11)          | ,908  | ,223 | 16,553  | 1  | ,000 | 2,479  | 1,601               | 3,840 |
| VASTY2(12)          | ,127  | ,248 | ,263    | 1  | ,608 | 1,136  | ,699                | 1,846 |
| VASTY2(13)          | ,852  | ,224 | 14,510  | 1  | ,000 | 2,344  | 1,512               | 3,633 |
| VASTY2(14)          | -,239 | ,267 | ,798    | 1  | ,372 | ,787   | ,466                | 1,330 |
| VASTY2(15)          | ,267  | ,242 | 1,219   | 1  | ,270 | 1,306  | ,813                | 2,100 |



**Variables in the Equation**

|            | B      | S.E. | Wald    | df | Sig. | Exp(B) | 95% C.I. for EXP(B) |       |
|------------|--------|------|---------|----|------|--------|---------------------|-------|
|            |        |      |         |    |      |        | Lower               | Upper |
| VASTY2(16) | ,283   | ,290 | ,954    | 1  | ,329 | 1,327  | ,752                | 2,341 |
| VASTY2(17) | -1,187 | ,356 | 11,133  | 1  | ,001 | ,305   | ,152                | ,613  |
| VASTY2(18) | -,862  | ,320 | 7,242   | 1  | ,007 | ,422   | ,226                | ,791  |
| VASTY2(19) | -1,163 | ,388 | 8,980   | 1  | ,003 | ,312   | ,146                | ,669  |
| VASTY2(20) | ,077   | ,262 | ,088    | 1  | ,767 | 1,081  | ,647                | 1,805 |
| VASTY2(21) | -,153  | ,263 | ,339    | 1  | ,561 | ,858   | ,513                | 1,436 |
| VASTY2(22) | ,104   | ,252 | ,170    | 1  | ,680 | 1,110  | ,677                | 1,820 |
| VASTY2(23) | ,717   | ,228 | 9,883   | 1  | ,002 | 2,048  | 1,310               | 3,203 |
| VASTY2(24) | ,581   | ,230 | 6,379   | 1  | ,012 | 1,788  | 1,139               | 2,808 |
| VASTY2(25) | ,098   | ,265 | ,136    | 1  | ,712 | 1,103  | ,656                | 1,853 |
| VASTY2(26) | -,848  | ,337 | 6,333   | 1  | ,012 | ,428   | ,221                | ,829  |
| VASTY2(27) | -1,244 | ,356 | 12,212  | 1  | ,000 | ,288   | ,143                | ,579  |
| VASTY2(28) | -,898  | ,371 | 5,852   | 1  | ,016 | ,407   | ,197                | ,843  |
| VASTY2(29) | -,934  | ,320 | 8,521   | 1  | ,004 | ,393   | ,210                | ,736  |
| VASTY2(30) | ,002   | ,252 | ,000    | 1  | ,993 | 1,002  | ,611                | 1,643 |
| VASTY2(31) | ,562   | ,235 | 5,728   | 1  | ,017 | 1,753  | 1,107               | 2,777 |
| VASTY2(32) | ,011   | ,261 | ,002    | 1  | ,966 | 1,011  | ,606                | 1,687 |
| VASTY2(33) | ,025   | ,258 | ,010    | 1  | ,922 | 1,026  | ,618                | 1,702 |
| VASTY2(34) | -1,559 | ,401 | 15,134  | 1  | ,000 | ,210   | ,096                | ,461  |
| VASTY2(35) | ,384   | ,245 | 2,466   | 1  | ,116 | 1,469  | ,909                | 2,374 |
| weekday    |        |      | 19,567  | 6  | ,003 |        |                     |       |
| weekday(1) | -,034  | ,107 | ,103    | 1  | ,748 | ,966   | ,783                | 1,192 |
| weekday(2) | -,070  | ,108 | ,420    | 1  | ,517 | ,932   | ,754                | 1,152 |
| weekday(3) | ,014   | ,107 | ,016    | 1  | ,899 | 1,014  | ,822                | 1,249 |
| weekday(4) | ,017   | ,107 | ,024    | 1  | ,877 | 1,017  | ,824                | 1,254 |
| weekday(5) | -,413  | ,119 | 12,114  | 1  | ,001 | ,662   | ,525                | ,835  |
| weekday(6) | ,050   | ,108 | ,210    | 1  | ,647 | 1,051  | ,850                | 1,299 |
| holiday(1) | -,475  | ,201 | 5,581   | 1  | ,018 | ,622   | ,419                | ,922  |
| season     |        |      | 14,254  | 4  | ,007 |        |                     |       |
| season(1)  | -,075  | ,092 | ,658    | 1  | ,417 | ,928   | ,774                | 1,112 |
| season(2)  | -,191  | ,088 | 4,747   | 1  | ,029 | ,826   | ,696                | ,981  |
| season(3)  | ,153   | ,088 | 3,014   | 1  | ,083 | 1,165  | ,981                | 1,384 |
| season(4)  | -,029  | ,093 | ,098    | 1  | ,754 | ,971   | ,809                | 1,166 |
| Constant   | -2,139 | ,200 | 114,213 | 1  | ,000 | ,118   |                     |       |

a. Variable(s) entered on step 1: bv3, VASTY2, weekday, holiday, season.

LOGISTIC REGRESSION VARIABLES hand01  
/METHOD=ENTER sv3 VASTY2 weekday holiday season

```

/CONTRAST (sv3)=Indicator(1)
/CONTRAST (VASTY2)=Indicator(1)
/CONTRAST (weekday)=Indicator(1)
/CONTRAST (holiday)=Indicator(1)
/CONTRAST (season)=Indicator(1)
/PRINT=CI(95)
/CRITERIA=PIN(0.05) POUT(0.10) ITERATE(20) CUT(0.5).

```

## Block 1: Method = Enter

### Omnibus Tests of Model Coefficients

|        |       | Chi-square | df | Sig. |
|--------|-------|------------|----|------|
| Step 1 | Step  | 593,799    | 48 | ,000 |
|        | Block | 593,799    | 48 | ,000 |
|        | Model | 593,799    | 48 | ,000 |

### Model Summary

| Step | -2 Log likelihood    | Cox & Snell R Square | Nagelkerke R Square |
|------|----------------------|----------------------|---------------------|
| 1    | 8029,78 <sup>a</sup> | ,046                 | ,093                |

a. Estimation terminated at iteration number 6 because parameter estimates changed by less than ,001.

### Classification Table<sup>a</sup>

| Observed           |                              |                     | Predicted                    |                     |                    |
|--------------------|------------------------------|---------------------|------------------------------|---------------------|--------------------|
|                    |                              |                     | hand01 händelse nej eller ja |                     | Percentage Correct |
|                    |                              |                     | 0 ingen händelse             | 1 minst en händelse |                    |
| Step 1             | hand01 händelse nej eller ja | 0 ingen händelse    | 11108                        | 0                   | 100,0              |
|                    |                              | 1 minst en händelse | 1367                         | 0                   | ,0                 |
| Overall Percentage |                              |                     |                              |                     | 89,0               |

a. The cut value is ,500

**Variables in the Equation**

|                         | B      | S.E. | Wald    | df | Sig. | Exp(B) | 95% C.I. for EXP(B) |       |
|-------------------------|--------|------|---------|----|------|--------|---------------------|-------|
|                         |        |      |         |    |      |        | Lower               | Upper |
| Step 1 <sup>a</sup> sv3 |        |      | 6,576   | 2  | ,037 |        |                     |       |
| sv3(1)                  | -,121  | ,086 | 1,964   | 1  | ,161 | ,886   | ,749                | 1,049 |
| sv3(2)                  | ,121   | ,084 | 2,074   | 1  | ,150 | 1,128  | ,957                | 1,329 |
| VASTY2                  |        |      | 437,718 | 35 | ,000 |        |                     |       |
| VASTY2(1)               | ,315   | ,241 | 1,713   | 1  | ,191 | 1,371  | ,855                | 2,198 |
| VASTY2(2)               | 1,154  | ,220 | 27,492  | 1  | ,000 | 3,169  | 2,059               | 4,878 |
| VASTY2(3)               | -,655  | ,302 | 4,706   | 1  | ,030 | ,519   | ,287                | ,939  |
| VASTY2(4)               | ,310   | ,242 | 1,641   | 1  | ,200 | 1,364  | ,848                | 2,193 |
| VASTY2(5)               | -,264  | ,283 | ,869    | 1  | ,351 | ,768   | ,441                | 1,338 |
| VASTY2(6)               | -1,049 | ,331 | 10,057  | 1  | ,002 | ,350   | ,183                | ,670  |
| VASTY2(7)               | 1,260  | ,217 | 33,606  | 1  | ,000 | 3,524  | 2,302               | 5,394 |
| VASTY2(8)               | ,389   | ,241 | 2,613   | 1  | ,106 | 1,476  | ,921                | 2,365 |
| VASTY2(9)               | ,275   | ,246 | 1,251   | 1  | ,263 | 1,317  | ,813                | 2,132 |
| VASTY2(10)              | ,990   | ,224 | 19,591  | 1  | ,000 | 2,692  | 1,736               | 4,174 |
| VASTY2(11)              | ,917   | ,223 | 16,909  | 1  | ,000 | 2,501  | 1,616               | 3,872 |
| VASTY2(12)              | ,070   | ,251 | ,077    | 1  | ,781 | 1,072  | ,656                | 1,752 |
| VASTY2(13)              | ,804   | ,228 | 12,431  | 1  | ,000 | 2,235  | 1,429               | 3,495 |
| VASTY2(14)              | -,272  | ,269 | 1,022   | 1  | ,312 | ,762   | ,450                | 1,290 |
| VASTY2(15)              | ,202   | ,245 | ,676    | 1  | ,411 | 1,223  | ,756                | 1,979 |
| VASTY2(16)              | ,271   | ,289 | ,882    | 1  | ,348 | 1,312  | ,745                | 2,311 |
| VASTY2(17)              | -1,163 | ,356 | 10,679  | 1  | ,001 | ,312   | ,155                | ,628  |
| VASTY2(18)              | -,747  | ,325 | 5,276   | 1  | ,022 | ,474   | ,251                | ,896  |
| VASTY2(19)              | -1,284 | ,387 | 10,981  | 1  | ,001 | ,277   | ,130                | ,592  |
| VASTY2(20)              | ,057   | ,262 | ,048    | 1  | ,827 | 1,059  | ,634                | 1,769 |
| VASTY2(21)              | -,104  | ,263 | ,156    | 1  | ,692 | ,901   | ,538                | 1,509 |
| VASTY2(22)              | ,062   | ,252 | ,061    | 1  | ,805 | 1,064  | ,649                | 1,744 |
| VASTY2(23)              | ,713   | ,228 | 9,763   | 1  | ,002 | 2,039  | 1,304               | 3,189 |
| VASTY2(24)              | ,614   | ,229 | 7,163   | 1  | ,007 | 1,848  | 1,179               | 2,897 |
| VASTY2(25)              | ,115   | ,265 | ,187    | 1  | ,665 | 1,122  | ,667                | 1,887 |
| VASTY2(26)              | -,845  | ,337 | 6,302   | 1  | ,012 | ,429   | ,222                | ,831  |
| VASTY2(27)              | -1,286 | ,357 | 12,973  | 1  | ,000 | ,276   | ,137                | ,556  |
| VASTY2(28)              | -,974  | ,375 | 6,762   | 1  | ,009 | ,378   | ,181                | ,787  |
| VASTY2(29)              | -1,019 | ,325 | 9,861   | 1  | ,002 | ,361   | ,191                | ,682  |
| VASTY2(30)              | ,090   | ,253 | ,125    | 1  | ,723 | 1,094  | ,666                | 1,796 |
| VASTY2(31)              | ,632   | ,238 | 7,037   | 1  | ,008 | 1,882  | 1,180               | 3,003 |
| VASTY2(32)              | ,045   | ,266 | ,028    | 1  | ,867 | 1,046  | ,621                | 1,760 |
| VASTY2(33)              | ,075   | ,264 | ,080    | 1  | ,777 | 1,078  | ,643                | 1,808 |
| VASTY2(34)              | -1,540 | ,401 | 14,764  | 1  | ,000 | ,214   | ,098                | ,470  |
| VASTY2(35)              | ,432   | ,243 | 3,170   | 1  | ,075 | 1,541  | ,957                | 2,481 |
| weekday                 |        |      | 19,432  | 6  | ,003 |        |                     |       |
| weekday(1)              | -,029  | ,107 | ,073    | 1  | ,787 | ,971   | ,787                | 1,199 |
| weekday(2)              | -,059  | ,108 | ,293    | 1  | ,588 | ,943   | ,763                | 1,166 |

**Variables in the Equation**

|            | B      | S.E. | Wald    | df | Sig. | Exp(B) | 95% C.I. for EXP(B) |       |
|------------|--------|------|---------|----|------|--------|---------------------|-------|
|            |        |      |         |    |      |        | Lower               | Upper |
| weekday(3) | ,025   | ,107 | ,056    | 1  | ,814 | 1,025  | ,832                | 1,264 |
| weekday(4) | ,028   | ,107 | ,070    | 1  | ,791 | 1,029  | ,834                | 1,270 |
| weekday(5) | -,411  | ,119 | 11,974  | 1  | ,001 | ,663   | ,525                | ,837  |
| weekday(6) | ,034   | ,108 | ,100    | 1  | ,752 | 1,035  | ,837                | 1,279 |
| holiday(1) | -,478  | ,201 | 5,647   | 1  | ,017 | ,620   | ,418                | ,920  |
| season     |        |      | 15,282  | 4  | ,004 |        |                     |       |
| season(1)  | -,084  | ,092 | ,827    | 1  | ,363 | ,920   | ,768                | 1,102 |
| season(2)  | -,207  | ,088 | 5,579   | 1  | ,018 | ,813   | ,685                | ,965  |
| season(3)  | ,147   | ,088 | 2,796   | 1  | ,095 | 1,158  | ,975                | 1,376 |
| season(4)  | -,040  | ,093 | ,184    | 1  | ,668 | ,961   | ,800                | 1,153 |
| Constant   | -2,163 | ,204 | 112,859 | 1  | ,000 | ,115   |                     |       |

a. Variable(s) entered on step 1: sv3, VASTY2, weekday, holiday, season.

```
LOGISTIC REGRESSION VARIABLES hand01
/METHOD=ENTER sv5 VASTY2 weekday holiday season
/CONTRAST (sv5)=Indicator(1)
/CONTRAST (VASTY2)=Indicator(1)
/CONTRAST (weekday)=Indicator(1)
/CONTRAST (holiday)=Indicator(1)
/CONTRAST (season)=Indicator(1)
/PRINT=CI(95)
/CRITERIA=PIN(0.05) POUT(0.10) ITERATE(20) CUT(0.5).
```

**Block 1: Method = Enter**

**Omnibus Tests of Model Coefficients**

|        |       | Chi-square | df | Sig. |
|--------|-------|------------|----|------|
| Step 1 | Step  | 600,509    | 50 | ,000 |
|        | Block | 600,509    | 50 | ,000 |
|        | Model | 600,509    | 50 | ,000 |

**Model Summary**

| Step | -2 Log likelihood    | Cox & Snell R Square | Nagelkerke R Square |
|------|----------------------|----------------------|---------------------|
| 1    | 8023,07 <sup>a</sup> | ,047                 | ,094                |

a. Estimation terminated at iteration number 6 because parameter estimates changed by less than ,001.

**Classification Table<sup>a</sup>**

| Observed           |                              | Predicted                    |                     |                    |       |
|--------------------|------------------------------|------------------------------|---------------------|--------------------|-------|
|                    |                              | hand01 händelse nej eller ja |                     | Percentage Correct |       |
|                    |                              | 0 ingen händelse             | 1 minst en händelse |                    |       |
| Step 1             | hand01 händelse nej eller ja | 0 ingen händelse             | 11108               | 0                  | 100,0 |
|                    |                              | 1 minst en händelse          | 1367                | 0                  | ,0    |
| Overall Percentage |                              |                              |                     |                    | 89,0  |

a. The cut value is ,500

**Variables in the Equation**

|                     | B      | S.E. | Wald    | df | Sig. | Exp(B) | 95% C.I. for EXP(B) |       |
|---------------------|--------|------|---------|----|------|--------|---------------------|-------|
|                     |        |      |         |    |      |        | Lower               | Upper |
| Step 1 <sup>a</sup> |        |      |         |    |      |        |                     |       |
| sv5                 |        |      | 13,344  | 4  | ,010 |        |                     |       |
| sv5(1)              | -,171  | ,109 | 2,454   | 1  | ,117 | ,842   | ,680                | 1,044 |
| sv5(2)              | -,043  | ,108 | ,160    | 1  | ,689 | ,958   | ,775                | 1,184 |
| sv5(3)              | -,069  | ,100 | ,474    | 1  | ,491 | ,933   | ,767                | 1,136 |
| sv5(4)              | ,224   | ,109 | 4,251   | 1  | ,039 | 1,251  | 1,011               | 1,548 |
| VASTY2              |        |      | 438,244 | 35 | ,000 |        |                     |       |
| VASTY2(1)           | ,299   | ,241 | 1,537   | 1  | ,215 | 1,348  | ,841                | 2,163 |
| VASTY2(2)           | 1,090  | ,222 | 24,070  | 1  | ,000 | 2,974  | 1,924               | 4,597 |
| VASTY2(3)           | -,670  | ,302 | 4,916   | 1  | ,027 | ,512   | ,283                | ,925  |
| VASTY2(4)           | ,306   | ,242 | 1,600   | 1  | ,206 | 1,359  | ,845                | 2,184 |
| VASTY2(5)           | -,288  | ,283 | 1,029   | 1  | ,310 | ,750   | ,430                | 1,307 |
| VASTY2(6)           | -1,161 | ,334 | 12,051  | 1  | ,001 | ,313   | ,163                | ,603  |
| VASTY2(7)           | 1,259  | ,217 | 33,591  | 1  | ,000 | 3,520  | 2,300               | 5,388 |
| VASTY2(8)           | ,363   | ,241 | 2,270   | 1  | ,132 | 1,438  | ,897                | 2,306 |
| VASTY2(9)           | ,283   | ,246 | 1,320   | 1  | ,251 | 1,326  | ,819                | 2,148 |
| VASTY2(10)          | ,912   | ,227 | 16,180  | 1  | ,000 | 2,489  | 1,596               | 3,882 |
| VASTY2(11)          | ,908   | ,223 | 16,576  | 1  | ,000 | 2,479  | 1,601               | 3,838 |
| VASTY2(12)          | ,034   | ,251 | ,018    | 1  | ,892 | 1,035  | ,632                | 1,694 |
| VASTY2(13)          | ,723   | ,231 | 9,766   | 1  | ,002 | 2,061  | 1,309               | 3,243 |

**Variables in the Equation**

|            | B      | S.E. | Wald    | df | Sig. | Exp(B) | 95% C.I. for EXP(B) |       |
|------------|--------|------|---------|----|------|--------|---------------------|-------|
|            |        |      |         |    |      |        | Lower               | Upper |
| VASTY2(14) | -,312  | ,269 | 1,342   | 1  | ,247 | ,732   | ,432                | 1,241 |
| VASTY2(15) | ,145   | ,247 | ,345    | 1  | ,557 | 1,156  | ,713                | 1,876 |
| VASTY2(16) | ,228   | ,290 | ,620    | 1  | ,431 | 1,257  | ,712                | 2,219 |
| VASTY2(17) | -1,183 | ,356 | 11,032  | 1  | ,001 | ,306   | ,152                | ,616  |
| VASTY2(18) | -,740  | ,329 | 5,064   | 1  | ,024 | ,477   | ,251                | ,909  |
| VASTY2(19) | -1,274 | ,391 | 10,613  | 1  | ,001 | ,280   | ,130                | ,602  |
| VASTY2(20) | -,005  | ,264 | ,000    | 1  | ,986 | ,995   | ,594                | 1,669 |
| VASTY2(21) | -,112  | ,263 | ,182    | 1  | ,670 | ,894   | ,534                | 1,497 |
| VASTY2(22) | ,053   | ,252 | ,044    | 1  | ,834 | 1,054  | ,643                | 1,728 |
| VASTY2(23) | ,703   | ,228 | 9,499   | 1  | ,002 | 2,020  | 1,292               | 3,159 |
| VASTY2(24) | ,584   | ,230 | 6,458   | 1  | ,011 | 1,794  | 1,143               | 2,815 |
| VASTY2(25) | ,091   | ,266 | ,118    | 1  | ,731 | 1,096  | ,651                | 1,844 |
| VASTY2(26) | -,851  | ,337 | 6,380   | 1  | ,012 | ,427   | ,221                | ,826  |
| VASTY2(27) | -1,338 | ,358 | 13,947  | 1  | ,000 | ,262   | ,130                | ,530  |
| VASTY2(28) | -1,106 | ,379 | 8,528   | 1  | ,003 | ,331   | ,158                | ,695  |
| VASTY2(29) | -1,159 | ,330 | 12,360  | 1  | ,000 | ,314   | ,164                | ,599  |
| VASTY2(30) | ,074   | ,253 | ,086    | 1  | ,770 | 1,077  | ,656                | 1,769 |
| VASTY2(31) | ,627   | ,241 | 6,767   | 1  | ,009 | 1,871  | 1,167               | 3,001 |
| VASTY2(32) | ,051   | ,270 | ,035    | 1  | ,851 | 1,052  | ,620                | 1,786 |
| VASTY2(33) | ,085   | ,269 | ,100    | 1  | ,752 | 1,089  | ,643                | 1,844 |
| VASTY2(34) | -1,549 | ,401 | 14,941  | 1  | ,000 | ,212   | ,097                | ,466  |
| VASTY2(35) | ,435   | ,243 | 3,201   | 1  | ,074 | 1,545  | ,959                | 2,489 |
| weekday    |        |      | 18,792  | 6  | ,005 |        |                     |       |
| weekday(1) | -,023  | ,107 | ,046    | 1  | ,830 | ,977   | ,792                | 1,206 |
| weekday(2) | -,055  | ,108 | ,260    | 1  | ,610 | ,946   | ,766                | 1,170 |
| weekday(3) | ,024   | ,107 | ,051    | 1  | ,821 | 1,024  | ,831                | 1,263 |
| weekday(4) | ,034   | ,107 | ,100    | 1  | ,752 | 1,035  | ,838                | 1,277 |
| weekday(5) | -,402  | ,119 | 11,427  | 1  | ,001 | ,669   | ,530                | ,844  |
| weekday(6) | ,036   | ,108 | ,111    | 1  | ,739 | 1,037  | ,839                | 1,281 |
| holiday(1) | -,481  | ,202 | 5,685   | 1  | ,017 | ,618   | ,417                | ,918  |
| season     |        |      | 14,175  | 4  | ,007 |        |                     |       |
| season(1)  | -,078  | ,092 | ,711    | 1  | ,399 | ,925   | ,772                | 1,108 |
| season(2)  | -,196  | ,088 | 4,969   | 1  | ,026 | ,822   | ,692                | ,977  |
| season(3)  | ,146   | ,088 | 2,772   | 1  | ,096 | 1,158  | ,974                | 1,375 |
| season(4)  | -,031  | ,093 | ,113    | 1  | ,737 | ,969   | ,807                | 1,164 |
| Constant   | -2,130 | ,209 | 103,891 | 1  | ,000 | ,119   |                     |       |

a. Variable(s) entered on step 1: sv5, VASTY2, weekday, holiday, season.

```

LOGISTIC REGRESSION VARIABLES hand01
/METHOD=ENTER sv7 VASTY2 weekday holiday season
/CONTRAST (sv7)=Indicator(1)
/CONTRAST (VASTY2)=Indicator(1)
/CONTRAST (weekday)=Indicator(1)
/CONTRAST (holiday)=Indicator(1)
/CONTRAST (season)=Indicator(1)
/PRINT=CI(95)
/CRITERIA=PIN(0.05) POUT(0.10) ITERATE(20) CUT(0.5).

```

## Block 1: Method = Enter

### Omnibus Tests of Model Coefficients

|        |       | Chi-square | df | Sig. |
|--------|-------|------------|----|------|
| Step 1 | Step  | 604,438    | 52 | ,000 |
|        | Block | 604,438    | 52 | ,000 |
|        | Model | 604,438    | 52 | ,000 |

### Model Summary

| Step | -2 Log likelihood    | Cox & Snell R Square | Nagelkerke R Square |
|------|----------------------|----------------------|---------------------|
| 1    | 8019,14 <sup>a</sup> | ,047                 | ,095                |

a. Estimation terminated at iteration number 6 because parameter estimates changed by less than ,001.

### Classification Table<sup>a</sup>

|                    |                              | Predicted                    |                     |                    |       |
|--------------------|------------------------------|------------------------------|---------------------|--------------------|-------|
|                    |                              | hand01 händelse nej eller ja |                     | Percentage Correct |       |
| Observed           |                              | 0 ingen händelse             | 1 minst en händelse |                    |       |
| Step 1             | hand01 händelse nej eller ja | 0 ingen händelse             | 11108               | 0                  | 100,0 |
|                    |                              | 1 minst en händelse          | 1367                | 0                  | ,0    |
| Overall Percentage |                              |                              |                     |                    | 89,0  |

a. The cut value is ,500

**Variables in the Equation**

|                         | B      | S.E. | Wald    | df | Sig. | Exp(B) | 95% C.I. for EXP(B) |       |
|-------------------------|--------|------|---------|----|------|--------|---------------------|-------|
|                         |        |      |         |    |      |        | Lower               | Upper |
| Step 1 <sup>a</sup> sv7 |        |      | 17,254  | 6  | ,008 |        |                     |       |
| sv7(1)                  | -,258  | ,126 | 4,229   | 1  | ,040 | ,772   | ,604                | ,988  |
| sv7(2)                  | -,052  | ,127 | ,169    | 1  | ,681 | ,949   | ,740                | 1,218 |
| sv7(3)                  | -,109  | ,126 | ,754    | 1  | ,385 | ,897   | ,701                | 1,147 |
| sv7(4)                  | -,064  | ,119 | ,293    | 1  | ,588 | ,938   | ,743                | 1,184 |
| sv7(5)                  | ,022   | ,113 | ,037    | 1  | ,847 | 1,022  | ,819                | 1,275 |
| sv7(6)                  | ,294   | ,127 | 5,396   | 1  | ,020 | 1,342  | 1,047               | 1,720 |
| VASTY2                  |        |      | 437,602 | 35 | ,000 |        |                     |       |
| VASTY2(1)               | ,303   | ,241 | 1,579   | 1  | ,209 | 1,354  | ,844                | 2,173 |
| VASTY2(2)               | 1,071  | ,223 | 23,151  | 1  | ,000 | 2,918  | 1,886               | 4,513 |
| VASTY2(3)               | -,676  | ,302 | 4,999   | 1  | ,025 | ,509   | ,281                | ,920  |
| VASTY2(4)               | ,296   | ,242 | 1,491   | 1  | ,222 | 1,345  | ,836                | 2,163 |
| VASTY2(5)               | -,271  | ,284 | ,916    | 1  | ,338 | ,762   | ,437                | 1,329 |
| VASTY2(6)               | -1,227 | ,337 | 13,247  | 1  | ,000 | ,293   | ,152                | ,568  |
| VASTY2(7)               | 1,255  | ,217 | 33,369  | 1  | ,000 | 3,507  | 2,291               | 5,368 |
| VASTY2(8)               | ,366   | ,241 | 2,307   | 1  | ,129 | 1,442  | ,899                | 2,314 |
| VASTY2(9)               | ,274   | ,246 | 1,241   | 1  | ,265 | 1,315  | ,812                | 2,130 |
| VASTY2(10)              | ,888   | ,227 | 15,274  | 1  | ,000 | 2,431  | 1,557               | 3,795 |
| VASTY2(11)              | ,915   | ,223 | 16,802  | 1  | ,000 | 2,497  | 1,612               | 3,868 |
| VASTY2(12)              | ,026   | ,251 | ,011    | 1  | ,917 | 1,026  | ,627                | 1,680 |
| VASTY2(13)              | ,692   | ,232 | 8,896   | 1  | ,003 | 1,999  | 1,268               | 3,150 |
| VASTY2(14)              | -,322  | ,270 | 1,427   | 1  | ,232 | ,725   | ,427                | 1,229 |
| VASTY2(15)              | ,121   | ,248 | ,239    | 1  | ,625 | 1,129  | ,695                | 1,834 |
| VASTY2(16)              | ,205   | ,291 | ,496    | 1  | ,481 | 1,227  | ,694                | 2,170 |
| VASTY2(17)              | -1,185 | ,356 | 11,067  | 1  | ,001 | ,306   | ,152                | ,614  |
| VASTY2(18)              | -,680  | ,331 | 4,213   | 1  | ,040 | ,507   | ,265                | ,970  |
| VASTY2(19)              | -1,205 | ,394 | 9,363   | 1  | ,002 | ,300   | ,138                | ,648  |
| VASTY2(20)              | -,029  | ,264 | ,012    | 1  | ,911 | ,971   | ,578                | 1,630 |
| VASTY2(21)              | -,115  | ,263 | ,190    | 1  | ,663 | ,892   | ,532                | 1,493 |
| VASTY2(22)              | ,057   | ,252 | ,051    | 1  | ,821 | 1,059  | ,646                | 1,735 |
| VASTY2(23)              | ,709   | ,228 | 9,646   | 1  | ,002 | 2,031  | 1,299               | 3,177 |
| VASTY2(24)              | ,580   | ,230 | 6,365   | 1  | ,012 | 1,786  | 1,138               | 2,804 |
| VASTY2(25)              | ,102   | ,266 | ,146    | 1  | ,702 | 1,107  | ,658                | 1,863 |
| VASTY2(26)              | -,853  | ,337 | 6,406   | 1  | ,011 | ,426   | ,220                | ,825  |
| VASTY2(27)              | -1,369 | ,359 | 14,543  | 1  | ,000 | ,254   | ,126                | ,514  |
| VASTY2(28)              | -1,183 | ,382 | 9,587   | 1  | ,002 | ,306   | ,145                | ,648  |
| VASTY2(29)              | -1,242 | ,334 | 13,838  | 1  | ,000 | ,289   | ,150                | ,556  |
| VASTY2(30)              | ,077   | ,253 | ,094    | 1  | ,760 | 1,081  | ,658                | 1,775 |
| VASTY2(31)              | ,664   | ,242 | 7,543   | 1  | ,006 | 1,942  | 1,209               | 3,118 |
| VASTY2(32)              | ,111   | ,273 | ,167    | 1  | ,683 | 1,118  | ,655                | 1,908 |
| VASTY2(33)              | ,154   | ,273 | ,316    | 1  | ,574 | 1,166  | ,683                | 1,992 |
| VASTY2(34)              | -1,551 | ,401 | 14,976  | 1  | ,000 | ,212   | ,097                | ,465  |



**Variables in the Equation**

|            | B      | S.E. | Wald   | df | Sig. | Exp(B) | 95% C.I. for EXP(B) |       |
|------------|--------|------|--------|----|------|--------|---------------------|-------|
|            |        |      |        |    |      |        | Lower               | Upper |
| VASTY2(35) | ,431   | ,243 | 3,128  | 1  | ,077 | 1,538  | ,954                | 2,479 |
| weekday    |        |      | 18,676 | 6  | ,005 |        |                     |       |
| weekday(1) | -,024  | ,107 | ,052   | 1  | ,820 | ,976   | ,791                | 1,205 |
| weekday(2) | -,053  | ,108 | ,237   | 1  | ,627 | ,949   | ,767                | 1,173 |
| weekday(3) | ,027   | ,107 | ,064   | 1  | ,800 | 1,027  | ,833                | 1,267 |
| weekday(4) | ,035   | ,107 | ,107   | 1  | ,744 | 1,036  | ,839                | 1,279 |
| weekday(5) | -,399  | ,119 | 11,250 | 1  | ,001 | ,671   | ,531                | ,847  |
| weekday(6) | ,039   | ,108 | ,132   | 1  | ,717 | 1,040  | ,841                | 1,286 |
| holiday(1) | -,474  | ,202 | 5,537  | 1  | ,019 | ,622   | ,419                | ,924  |
| season     |        |      | 13,156 | 4  | ,011 |        |                     |       |
| season(1)  | -,076  | ,092 | ,678   | 1  | ,410 | ,927   | ,774                | 1,111 |
| season(2)  | -,186  | ,088 | 4,484  | 1  | ,034 | ,830   | ,698                | ,986  |
| season(3)  | ,144   | ,088 | 2,677  | 1  | ,102 | 1,155  | ,972                | 1,372 |
| season(4)  | -,030  | ,093 | ,100   | 1  | ,751 | ,971   | ,808                | 1,166 |
| Constant   | -2,116 | ,213 | 98,831 | 1  | ,000 | ,121   |                     |       |

a. Variable(s) entered on step 1: sv7, VASTY2, weekday, holiday, season.

\*\*

```
LOGISTIC REGRESSION VARIABLES luonnelt1
/METHOD=ENTER bv1 VASTY2 weekday holiday season
/CONTRAST (bv1)=Indicator(1)
/CONTRAST (VASTY2)=Indicator(1)
/CONTRAST (weekday)=Indicator(1)
/CONTRAST (holiday)=Indicator(1)
/CONTRAST (season)=Indicator(1)
/PRINT=CI(95)
/CRITERIA=PIN(0.05) POUT(0.10) ITERATE(20) CUT(0.5).
```

**Block 1: Method = Enter**

**Omnibus Tests of Model Coefficients**

|        |       | Chi-square | df | Sig. |
|--------|-------|------------|----|------|
| Step 1 | Step  | 340,523    | 48 | ,000 |
|        | Block | 340,523    | 48 | ,000 |
|        | Model | 340,523    | 48 | ,000 |

**Model Summary**

| Step | -2 Log likelihood    | Cox & Snell R Square | Nagelkerke R Square |
|------|----------------------|----------------------|---------------------|
| 1    | 5856,35 <sup>a</sup> | ,027                 | ,069                |

a. Estimation terminated at iteration number 7 because parameter estimates changed by less than ,001.

**Classification Table<sup>a</sup>**

|                    |                                                | Predicted                                                    |              |
|--------------------|------------------------------------------------|--------------------------------------------------------------|--------------|
|                    |                                                | luonnelt1<br>luonne<br>highest = ...                         |              |
| Observed           |                                                | 0 ingen<br>händelse<br>eller läheltä<br>piti                 |              |
| Step 1             | luonnelt1 luonne highest = tapahtui potilaalle | 0 ingen händelse eller läheltä piti<br>1 tapahtui potilaalle | 11627<br>848 |
| Overall Percentage |                                                |                                                              |              |

**Classification Table<sup>a</sup>**

|                    |                                                | Predicted                                                    |        |
|--------------------|------------------------------------------------|--------------------------------------------------------------|--------|
|                    |                                                | luonnelt1<br>luonne<br>highest = ...                         |        |
| Observed           |                                                | 1 tapahtui<br>potilaalle                                     |        |
| Step 1             | luonnelt1 luonne highest = tapahtui potilaalle | 0 ingen händelse eller läheltä piti<br>1 tapahtui potilaalle | 0<br>0 |
| Overall Percentage |                                                |                                                              |        |

Classification Table<sup>a</sup>

|                    |                                                |                                                              | Predicted          |
|--------------------|------------------------------------------------|--------------------------------------------------------------|--------------------|
|                    |                                                |                                                              |                    |
| Observed           |                                                |                                                              | Percentage Correct |
| Step 1             | luonnelt1 luonne highest = tapahtui potilaalle | 0 ingen händelse eller läheltä piti<br>1 tapahtui potilaalle | 100,0<br>,0        |
| Overall Percentage |                                                |                                                              | 93,2               |

a. The cut value is ,500

Variables in the Equation

|                         | B      | S.E. | Wald    | df | Sig. | Exp(B) | 95% C.I. for EXP(B) |       |
|-------------------------|--------|------|---------|----|------|--------|---------------------|-------|
|                         |        |      |         |    |      |        | Lower               | Upper |
| Step 1 <sup>a</sup> bv1 |        |      | 8,766   | 2  | ,012 |        |                     |       |
|                         | -,246  | ,103 | 5,744   | 1  | ,017 | ,782   | ,640                | ,956  |
|                         | ,079   | ,086 | ,834    | 1  | ,361 | 1,082  | ,914                | 1,280 |
| VASTY2                  |        |      | 238,129 | 35 | ,000 |        |                     |       |
| VASTY2(1)               | ,096   | ,299 | ,102    | 1  | ,750 | 1,100  | ,612                | 1,979 |
| VASTY2(2)               | ,545   | ,275 | 3,944   | 1  | ,047 | 1,725  | 1,007               | 2,956 |
| VASTY2(3)               | -1,490 | ,467 | 10,197  | 1  | ,001 | ,225   | ,090                | ,562  |
| VASTY2(4)               | ,138   | ,294 | ,220    | 1  | ,639 | 1,148  | ,645                | 2,043 |
| VASTY2(5)               | -,194  | ,325 | ,357    | 1  | ,550 | ,823   | ,435                | 1,557 |
| VASTY2(6)               | -1,287 | ,440 | 8,574   | 1  | ,003 | ,276   | ,117                | ,653  |
| VASTY2(7)               | ,548   | ,277 | 3,911   | 1  | ,048 | 1,729  | 1,005               | 2,976 |
| VASTY2(8)               | -,255  | ,320 | ,632    | 1  | ,427 | ,775   | ,414                | 1,452 |
| VASTY2(9)               | ,267   | ,291 | ,842    | 1  | ,359 | 1,307  | ,738                | 2,313 |
| VASTY2(10)              | 1,026  | ,259 | 15,764  | 1  | ,000 | 2,791  | 1,682               | 4,632 |
| VASTY2(11)              | ,616   | ,273 | 5,109   | 1  | ,024 | 1,852  | 1,085               | 3,160 |
| VASTY2(12)              | ,122   | ,295 | ,171    | 1  | ,679 | 1,130  | ,634                | 2,013 |
| VASTY2(13)              | ,983   | ,261 | 14,230  | 1  | ,000 | 2,673  | 1,604               | 4,456 |
| VASTY2(14)              | -,248  | ,320 | ,597    | 1  | ,440 | ,781   | ,417                | 1,463 |
| VASTY2(15)              | ,247   | ,288 | ,731    | 1  | ,392 | 1,280  | ,727                | 2,253 |
| VASTY2(16)              | ,411   | ,331 | 1,546   | 1  | ,214 | 1,509  | ,789                | 2,887 |
| VASTY2(17)              | -1,079 | ,418 | 6,664   | 1  | ,010 | ,340   | ,150                | ,771  |
| VASTY2(18)              | -,668  | ,365 | 3,352   | 1  | ,067 | ,513   | ,251                | 1,048 |
| VASTY2(19)              | -1,638 | ,551 | 8,843   | 1  | ,003 | ,194   | ,066                | ,572  |
| VASTY2(20)              | ,040   | ,314 | ,016    | 1  | ,899 | 1,041  | ,562                | 1,928 |
| VASTY2(21)              | -,124  | ,312 | ,158    | 1  | ,691 | ,883   | ,479                | 1,628 |
| VASTY2(22)              | ,316   | ,291 | 1,183   | 1  | ,277 | 1,372  | ,776                | 2,426 |
| VASTY2(23)              | ,286   | ,288 | ,986    | 1  | ,321 | 1,331  | ,757                | 2,342 |

Variables in the Equation

|            | B      | S.E. | Wald    | df | Sig. | Exp(B) | 95% C.I. for EXP(B) |       |
|------------|--------|------|---------|----|------|--------|---------------------|-------|
|            |        |      |         |    |      |        | Lower               | Upper |
| VASTY2(24) | ,263   | ,286 | ,847    | 1  | ,357 | 1,301  | ,743                | 2,280 |
| VASTY2(25) | ,300   | ,301 | ,996    | 1  | ,318 | 1,350  | ,749                | 2,435 |
| VASTY2(26) | -,945  | ,419 | 5,078   | 1  | ,024 | ,389   | ,171                | ,884  |
| VASTY2(27) | -1,461 | ,466 | 9,840   | 1  | ,002 | ,232   | ,093                | ,578  |
| VASTY2(28) | -1,012 | ,468 | 4,680   | 1  | ,031 | ,363   | ,145                | ,909  |
| VASTY2(29) | -1,039 | ,401 | 6,709   | 1  | ,010 | ,354   | ,161                | ,777  |
| VASTY2(30) | -,203  | ,316 | ,414    | 1  | ,520 | ,816   | ,439                | 1,516 |
| VASTY2(31) | ,499   | ,278 | 3,221   | 1  | ,073 | 1,648  | ,955                | 2,843 |
| VASTY2(32) | -,061  | ,313 | ,038    | 1  | ,845 | ,940   | ,509                | 1,737 |
| VASTY2(33) | ,012   | ,306 | ,002    | 1  | ,968 | 1,012  | ,556                | 1,843 |
| VASTY2(34) | -1,274 | ,439 | 8,429   | 1  | ,004 | ,280   | ,118                | ,661  |
| VASTY2(35) | ,650   | ,279 | 5,444   | 1  | ,020 | 1,915  | 1,110               | 3,307 |
| weekday    |        |      | 11,843  | 6  | ,066 |        |                     |       |
| weekday(1) | -,011  | ,129 | ,008    | 1  | ,929 | ,989   | ,767                | 1,274 |
| weekday(2) | -,033  | ,130 | ,066    | 1  | ,798 | ,967   | ,750                | 1,248 |
| weekday(3) | -,043  | ,130 | ,111    | 1  | ,740 | ,958   | ,742                | 1,237 |
| weekday(4) | ,042   | ,129 | ,107    | 1  | ,743 | 1,043  | ,810                | 1,343 |
| weekday(5) | -,225  | ,139 | 2,621   | 1  | ,105 | ,798   | ,608                | 1,049 |
| weekday(6) | -,361  | ,143 | 6,344   | 1  | ,012 | ,697   | ,526                | ,923  |
| holiday(1) | -,435  | ,253 | 2,966   | 1  | ,085 | ,647   | ,394                | 1,062 |
| season     |        |      | 3,733   | 4  | ,443 |        |                     |       |
| season(1)  | -,115  | ,113 | 1,020   | 1  | ,313 | ,892   | ,714                | 1,114 |
| season(2)  | -,110  | ,106 | 1,085   | 1  | ,298 | ,896   | ,728                | 1,102 |
| season(3)  | ,070   | ,108 | ,423    | 1  | ,516 | 1,073  | ,868                | 1,327 |
| season(4)  | -,073  | ,115 | ,405    | 1  | ,525 | ,929   | ,742                | 1,165 |
| Constant   | -2,497 | ,241 | 107,046 | 1  | ,000 | ,082   |                     |       |

a. Variable(s) entered on step 1: bv1, VASTY2, weekday, holiday, season.

```
LOGISTIC REGRESSION VARIABLES luonnelt1
/METHOD=ENTER bv2 VASTY2 weekday holiday season
/CONTRAST (bv2)=Indicator(1)
/CONTRAST (VASTY2)=Indicator(1)
/CONTRAST (weekday)=Indicator(1)
/CONTRAST (holiday)=Indicator(1)
/CONTRAST (season)=Indicator(1)
/PRINT=CI(95)
/CRITERIA=PIN(0.05) POUT(0.10) ITERATE(20) CUT(0.5).
```

**Block 1: Method = Enter**

**Omnibus Tests of Model Coefficients**

|        |       | Chi-square | df | Sig. |
|--------|-------|------------|----|------|
| Step 1 | Step  | 336,814    | 48 | ,000 |
|        | Block | 336,814    | 48 | ,000 |
|        | Model | 336,814    | 48 | ,000 |

**Model Summary**

| Step | -2 Log likelihood    | Cox & Snell R Square | Nagelkerke R Square |
|------|----------------------|----------------------|---------------------|
| 1    | 5860,06 <sup>a</sup> | ,027                 | ,068                |

a. Estimation terminated at iteration number 7 because parameter estimates changed by less than ,001.

**Classification Table<sup>a</sup>**

|                    |                                                |                                                              | Predicted                                    |
|--------------------|------------------------------------------------|--------------------------------------------------------------|----------------------------------------------|
|                    |                                                |                                                              | luonnelt1<br>luonne<br>highest = ...         |
| Observed           |                                                |                                                              | 0 ingen<br>händelse<br>eller läheltä<br>piti |
| Step 1             | luonnelt1 luonne highest = tapahtui potilaalle | 0 ingen händelse eller läheltä piti<br>1 tapahtui potilaalle | 11627<br>848                                 |
| Overall Percentage |                                                |                                                              |                                              |

**Classification Table<sup>a</sup>**

|                    |                                                |                                                              | Predicted                            |
|--------------------|------------------------------------------------|--------------------------------------------------------------|--------------------------------------|
|                    |                                                |                                                              | luonnelt1<br>luonne<br>highest = ... |
| Observed           |                                                |                                                              | 1 tapahtui<br>potilaalle             |
| Step 1             | luonnelt1 luonne highest = tapahtui potilaalle | 0 ingen händelse eller läheltä piti<br>1 tapahtui potilaalle | 0<br>0                               |
| Overall Percentage |                                                |                                                              |                                      |

Classification Table<sup>a</sup>

|                    |                                                |                                                              | Predicted          |
|--------------------|------------------------------------------------|--------------------------------------------------------------|--------------------|
|                    |                                                |                                                              |                    |
| Observed           |                                                |                                                              | Percentage Correct |
| Step 1             | luonnelt1 luonne highest = tapahtui potilaalle | 0 ingen händelse eller läheltä piti<br>1 tapahtui potilaalle | 100,0<br>,0        |
| Overall Percentage |                                                |                                                              | 93,2               |

a. The cut value is ,500

Variables in the Equation

|                     |            | B      | S.E. | Wald    | df | Sig. | Exp(B) | 95% C.I. for EXP(B) |       |
|---------------------|------------|--------|------|---------|----|------|--------|---------------------|-------|
|                     |            |        |      |         |    |      |        | Lower               | Upper |
| Step 1 <sup>a</sup> | bv2        |        |      | 5,271   | 2  | ,072 |        |                     |       |
|                     | bv2(1)     | -,148  | ,103 | 2,044   | 1  | ,153 | ,863   | ,705                | 1,056 |
|                     | bv2(2)     | ,066   | ,095 | ,481    | 1  | ,488 | 1,068  | ,887                | 1,285 |
|                     | VASTY2     |        |      | 240,171 | 35 | ,000 |        |                     |       |
|                     | VASTY2(1)  | ,086   | ,299 | ,082    | 1  | ,774 | 1,090  | ,606                | 1,960 |
|                     | VASTY2(2)  | ,550   | ,275 | 4,013   | 1  | ,045 | 1,734  | 1,012               | 2,970 |
|                     | VASTY2(3)  | -1,471 | ,466 | 9,950   | 1  | ,002 | ,230   | ,092                | ,573  |
|                     | VASTY2(4)  | ,148   | ,294 | ,255    | 1  | ,613 | 1,160  | ,652                | 2,063 |
|                     | VASTY2(5)  | -,194  | ,325 | ,355    | 1  | ,551 | ,824   | ,436                | 1,558 |
|                     | VASTY2(6)  | -1,277 | ,439 | 8,456   | 1  | ,004 | ,279   | ,118                | ,659  |
|                     | VASTY2(7)  | ,560   | ,276 | 4,130   | 1  | ,042 | 1,752  | 1,020               | 3,007 |
|                     | VASTY2(8)  | -,250  | ,320 | ,608    | 1  | ,436 | ,779   | ,416                | 1,459 |
|                     | VASTY2(9)  | ,270   | ,291 | ,856    | 1  | ,355 | 1,309  | ,740                | 2,318 |
|                     | VASTY2(10) | 1,036  | ,259 | 16,065  | 1  | ,000 | 2,819  | 1,698               | 4,679 |
|                     | VASTY2(11) | ,617   | ,272 | 5,122   | 1  | ,024 | 1,852  | 1,086               | 3,160 |
|                     | VASTY2(12) | ,129   | ,295 | ,193    | 1  | ,661 | 1,138  | ,639                | 2,029 |
|                     | VASTY2(13) | ,993   | ,261 | 14,512  | 1  | ,000 | 2,701  | 1,620               | 4,502 |
|                     | VASTY2(14) | -,245  | ,320 | ,587    | 1  | ,444 | ,782   | ,418                | 1,466 |
|                     | VASTY2(15) | ,246   | ,289 | ,728    | 1  | ,393 | 1,279  | ,727                | 2,253 |
|                     | VASTY2(16) | ,404   | ,331 | 1,490   | 1  | ,222 | 1,497  | ,783                | 2,862 |
|                     | VASTY2(17) | -1,083 | ,418 | 6,711   | 1  | ,010 | ,339   | ,149                | ,768  |
|                     | VASTY2(18) | -,677  | ,365 | 3,442   | 1  | ,064 | ,508   | ,249                | 1,039 |
|                     | VASTY2(19) | -1,706 | ,549 | 9,647   | 1  | ,002 | ,182   | ,062                | ,533  |
|                     | VASTY2(20) | ,046   | ,314 | ,021    | 1  | ,884 | 1,047  | ,566                | 1,938 |
|                     | VASTY2(21) | -,122  | ,312 | ,152    | 1  | ,697 | ,886   | ,480                | 1,632 |
|                     | VASTY2(22) | ,307   | ,291 | 1,111   | 1  | ,292 | 1,359  | ,768                | 2,404 |
|                     | VASTY2(23) | ,278   | ,288 | ,928    | 1  | ,335 | 1,320  | ,750                | 2,322 |

**Variables in the Equation**

|            | B      | S.E. | Wald    | df | Sig. | Exp(B) | 95% C.I. for EXP(B) |       |
|------------|--------|------|---------|----|------|--------|---------------------|-------|
|            |        |      |         |    |      |        | Lower               | Upper |
| VASTY2(24) | ,280   | ,286 | ,955    | 1  | ,328 | 1,323  | ,755                | 2,317 |
| VASTY2(25) | ,300   | ,301 | ,995    | 1  | ,318 | 1,350  | ,749                | 2,435 |
| VASTY2(26) | -,945  | ,419 | 5,081   | 1  | ,024 | ,389   | ,171                | ,884  |
| VASTY2(27) | -1,460 | ,466 | 9,827   | 1  | ,002 | ,232   | ,093                | ,579  |
| VASTY2(28) | -1,008 | ,468 | 4,635   | 1  | ,031 | ,365   | ,146                | ,914  |
| VASTY2(29) | -1,028 | ,401 | 6,576   | 1  | ,010 | ,358   | ,163                | ,785  |
| VASTY2(30) | -,194  | ,316 | ,376    | 1  | ,540 | ,824   | ,444                | 1,530 |
| VASTY2(31) | ,490   | ,278 | 3,110   | 1  | ,078 | 1,632  | ,947                | 2,813 |
| VASTY2(32) | -,082  | ,312 | ,068    | 1  | ,794 | ,922   | ,500                | 1,700 |
| VASTY2(33) | -,002  | ,305 | ,000    | 1  | ,993 | ,998   | ,548                | 1,815 |
| VASTY2(34) | -1,268 | ,439 | 8,351   | 1  | ,004 | ,281   | ,119                | ,665  |
| VASTY2(35) | ,659   | ,278 | 5,637   | 1  | ,018 | 1,933  | 1,122               | 3,331 |
| weekday    |        |      | 12,024  | 6  | ,061 |        |                     |       |
| weekday(1) | -,007  | ,129 | ,003    | 1  | ,959 | ,993   | ,771                | 1,280 |
| weekday(2) | -,030  | ,130 | ,053    | 1  | ,818 | ,971   | ,752                | 1,252 |
| weekday(3) | -,041  | ,130 | ,097    | 1  | ,755 | ,960   | ,744                | 1,240 |
| weekday(4) | ,039   | ,129 | ,090    | 1  | ,764 | 1,039  | ,807                | 1,338 |
| weekday(5) | -,228  | ,139 | 2,691   | 1  | ,101 | ,796   | ,606                | 1,045 |
| weekday(6) | -,363  | ,144 | 6,400   | 1  | ,011 | ,695   | ,525                | ,921  |
| holiday(1) | -,438  | ,253 | 3,006   | 1  | ,083 | ,645   | ,393                | 1,059 |
| season     |        |      | 3,856   | 4  | ,426 |        |                     |       |
| season(1)  | -,115  | ,113 | 1,031   | 1  | ,310 | ,891   | ,714                | 1,113 |
| season(2)  | -,120  | ,106 | 1,285   | 1  | ,257 | ,887   | ,721                | 1,091 |
| season(3)  | ,066   | ,108 | ,370    | 1  | ,543 | 1,068  | ,864                | 1,321 |
| season(4)  | -,078  | ,115 | ,457    | 1  | ,499 | ,925   | ,738                | 1,159 |
| Constant   | -2,505 | ,246 | 103,317 | 1  | ,000 | ,082   |                     |       |

a. Variable(s) entered on step 1: bv2, VASTY2, weekday, holiday, season.

```
LOGISTIC REGRESSION VARIABLES luonnelt1
/METHOD=ENTER bv3 VASTY2 weekday holiday season
/CONTRAST (bv3)=Indicator(1)
/CONTRAST (VASTY2)=Indicator(1)
/CONTRAST (weekday)=Indicator(1)
/CONTRAST (holiday)=Indicator(1)
/CONTRAST (season)=Indicator(1)
/PRINT=CI(95)
/CRITERIA=PIN(0.05) POUT(0.10) ITERATE(20) CUT(0.5).
```

**Block 1: Method = Enter**

**Omnibus Tests of Model Coefficients**

|        |       | Chi-square | df | Sig. |
|--------|-------|------------|----|------|
| Step 1 | Step  | 337,695    | 48 | ,000 |
|        | Block | 337,695    | 48 | ,000 |
|        | Model | 337,695    | 48 | ,000 |

**Model Summary**

| Step | -2 Log likelihood    | Cox & Snell R Square | Nagelkerke R Square |
|------|----------------------|----------------------|---------------------|
| 1    | 5859,18 <sup>a</sup> | ,027                 | ,068                |

a. Estimation terminated at iteration number 7 because parameter estimates changed by less than ,001.

**Classification Table<sup>a</sup>**

|                    |                                                |                                                              | Predicted                                    |
|--------------------|------------------------------------------------|--------------------------------------------------------------|----------------------------------------------|
|                    |                                                |                                                              | luonnelt1<br>luonne<br>highest = ...         |
| Observed           |                                                |                                                              | 0 ingen<br>händelse<br>eller läheltä<br>piti |
| Step 1             | luonnelt1 luonne highest = tapahtui potilaalle | 0 ingen händelse eller läheltä piti<br>1 tapahtui potilaalle | 11627<br>848                                 |
| Overall Percentage |                                                |                                                              |                                              |

**Classification Table<sup>a</sup>**

|                    |                                                |                                                              | Predicted                            |
|--------------------|------------------------------------------------|--------------------------------------------------------------|--------------------------------------|
|                    |                                                |                                                              | luonnelt1<br>luonne<br>highest = ... |
| Observed           |                                                |                                                              | 1 tapahtui<br>potilaalle             |
| Step 1             | luonnelt1 luonne highest = tapahtui potilaalle | 0 ingen händelse eller läheltä piti<br>1 tapahtui potilaalle | 0<br>0                               |
| Overall Percentage |                                                |                                                              |                                      |



Classification Table<sup>a</sup>

|                    |                                                |                                                              | Predicted          |
|--------------------|------------------------------------------------|--------------------------------------------------------------|--------------------|
| Observed           |                                                |                                                              | Percentage Correct |
| Step 1             | luonnelt1 luonne highest = tapahtui potilaalle | 0 ingen händelse eller läheltä piti<br>1 tapahtui potilaalle | 100,0<br>,0        |
| Overall Percentage |                                                |                                                              | 93,2               |

a. The cut value is ,500

Variables in the Equation

|                         | B      | S.E. | Wald    | df | Sig. | Exp(B) | 95% C.I. for EXP(B) |       |
|-------------------------|--------|------|---------|----|------|--------|---------------------|-------|
|                         |        |      |         |    |      |        | Lower               | Upper |
| Step 1 <sup>a</sup> bv3 |        |      | 5,945   | 2  | ,051 |        |                     |       |
| bv3(1)                  | -,292  | ,141 | 4,310   | 1  | ,038 | ,746   | ,566                | ,984  |
| bv3(2)                  | ,107   | ,104 | 1,059   | 1  | ,303 | 1,113  | ,907                | 1,366 |
| VASTY2                  |        |      | 242,042 | 35 | ,000 |        |                     |       |
| VASTY2(1)               | ,118   | ,299 | ,156    | 1  | ,693 | 1,126  | ,626                | 2,025 |
| VASTY2(2)               | ,566   | ,274 | 4,258   | 1  | ,039 | 1,762  | 1,029               | 3,017 |
| VASTY2(3)               | -1,454 | ,466 | 9,719   | 1  | ,002 | ,234   | ,094                | ,583  |
| VASTY2(4)               | ,163   | ,294 | ,307    | 1  | ,579 | 1,177  | ,662                | 2,094 |
| VASTY2(5)               | -,175  | ,325 | ,290    | 1  | ,590 | ,839   | ,444                | 1,587 |
| VASTY2(6)               | -1,266 | ,440 | 8,299   | 1  | ,004 | ,282   | ,119                | ,667  |
| VASTY2(7)               | ,567   | ,279 | 4,136   | 1  | ,042 | 1,763  | 1,021               | 3,046 |
| VASTY2(8)               | -,223  | ,320 | ,489    | 1  | ,485 | ,800   | ,427                | 1,497 |
| VASTY2(9)               | ,297   | ,291 | 1,040   | 1  | ,308 | 1,345  | ,761                | 2,379 |
| VASTY2(10)              | 1,055  | ,258 | 16,714  | 1  | ,000 | 2,872  | 1,732               | 4,763 |
| VASTY2(11)              | ,631   | ,272 | 5,363   | 1  | ,021 | 1,879  | 1,102               | 3,206 |
| VASTY2(12)              | ,154   | ,294 | ,274    | 1  | ,601 | 1,166  | ,655                | 2,077 |
| VASTY2(13)              | 1,034  | ,259 | 15,951  | 1  | ,000 | 2,813  | 1,693               | 4,673 |
| VASTY2(14)              | -,222  | ,320 | ,481    | 1  | ,488 | ,801   | ,428                | 1,500 |
| VASTY2(15)              | ,271   | ,288 | ,886    | 1  | ,347 | 1,312  | ,746                | 2,307 |
| VASTY2(16)              | ,411   | ,332 | 1,537   | 1  | ,215 | 1,509  | ,787                | 2,891 |
| VASTY2(17)              | -1,091 | ,418 | 6,822   | 1  | ,009 | ,336   | ,148                | ,762  |
| VASTY2(18)              | -,669  | ,365 | 3,356   | 1  | ,067 | ,512   | ,251                | 1,048 |
| VASTY2(19)              | -1,634 | ,553 | 8,739   | 1  | ,003 | ,195   | ,066                | ,577  |
| VASTY2(20)              | ,059   | ,315 | ,036    | 1  | ,850 | 1,061  | ,573                | 1,966 |
| VASTY2(21)              | -,108  | ,312 | ,120    | 1  | ,729 | ,898   | ,487                | 1,654 |
| VASTY2(22)              | ,280   | ,290 | ,933    | 1  | ,334 | 1,324  | ,749                | 2,338 |
| VASTY2(23)              | ,286   | ,288 | ,986    | 1  | ,321 | 1,331  | ,757                | 2,342 |

Variables in the Equation

|            | B      | S.E. | Wald    | df | Sig. | Exp(B) | 95% C.I. for EXP(B) |       |
|------------|--------|------|---------|----|------|--------|---------------------|-------|
|            |        |      |         |    |      |        | Lower               | Upper |
| VASTY2(24) | ,290   | ,286 | 1,029   | 1  | ,310 | 1,336  | ,763                | 2,340 |
| VASTY2(25) | ,314   | ,301 | 1,086   | 1  | ,297 | 1,369  | ,759                | 2,470 |
| VASTY2(26) | -,920  | ,419 | 4,817   | 1  | ,028 | ,399   | ,175                | ,906  |
| VASTY2(27) | -1,430 | ,465 | 9,449   | 1  | ,002 | ,239   | ,096                | ,595  |
| VASTY2(28) | -,969  | ,468 | 4,300   | 1  | ,038 | ,379   | ,152                | ,948  |
| VASTY2(29) | -1,025 | ,401 | 6,538   | 1  | ,011 | ,359   | ,164                | ,787  |
| VASTY2(30) | -,196  | ,316 | ,384    | 1  | ,535 | ,822   | ,443                | 1,527 |
| VASTY2(31) | ,520   | ,279 | 3,467   | 1  | ,063 | 1,682  | ,973                | 2,908 |
| VASTY2(32) | -,043  | ,314 | ,018    | 1  | ,892 | ,958   | ,518                | 1,774 |
| VASTY2(33) | ,035   | ,307 | ,013    | 1  | ,909 | 1,036  | ,568                | 1,889 |
| VASTY2(34) | -1,262 | ,439 | 8,285   | 1  | ,004 | ,283   | ,120                | ,668  |
| VASTY2(35) | ,670   | ,279 | 5,760   | 1  | ,016 | 1,953  | 1,131               | 3,375 |
| weekday    |        |      | 12,001  | 6  | ,062 |        |                     |       |
| weekday(1) | -,011  | ,129 | ,007    | 1  | ,932 | ,989   | ,768                | 1,274 |
| weekday(2) | -,037  | ,130 | ,083    | 1  | ,773 | ,963   | ,747                | 1,243 |
| weekday(3) | -,048  | ,130 | ,134    | 1  | ,715 | ,953   | ,738                | 1,231 |
| weekday(4) | ,035   | ,129 | ,072    | 1  | ,788 | 1,035  | ,804                | 1,333 |
| weekday(5) | -,238  | ,139 | 2,932   | 1  | ,087 | ,788   | ,600                | 1,035 |
| weekday(6) | -,363  | ,144 | 6,396   | 1  | ,011 | ,696   | ,525                | ,922  |
| holiday(1) | -,441  | ,253 | 3,048   | 1  | ,081 | ,643   | ,392                | 1,056 |
| season     |        |      | 3,977   | 4  | ,409 |        |                     |       |
| season(1)  | -,115  | ,113 | 1,032   | 1  | ,310 | ,891   | ,714                | 1,113 |
| season(2)  | -,123  | ,106 | 1,350   | 1  | ,245 | ,885   | ,719                | 1,088 |
| season(3)  | ,067   | ,108 | ,388    | 1  | ,533 | 1,070  | ,865                | 1,323 |
| season(4)  | -,077  | ,115 | ,444    | 1  | ,505 | ,926   | ,739                | 1,161 |
| Constant   | -2,524 | ,240 | 110,913 | 1  | ,000 | ,080   |                     |       |

a. Variable(s) entered on step 1: bv3, VASTY2, weekday, holiday, season.

```
LOGISTIC REGRESSION VARIABLES luonnelt1
/METHOD=ENTER sv3 VASTY2 weekday holiday season
/CONTRAST (sv3)=Indicator(1)
/CONTRAST (VASTY2)=Indicator(1)
/CONTRAST (weekday)=Indicator(1)
/CONTRAST (holiday)=Indicator(1)
/CONTRAST (season)=Indicator(1)
/PRINT=CI(95)
/CRITERIA=PIN(0.05) POUT(0.10) ITERATE(20) CUT(0.5).
```

**Block 1: Method = Enter**

**Omnibus Tests of Model Coefficients**

|        |       | Chi-square | df | Sig. |
|--------|-------|------------|----|------|
| Step 1 | Step  | 333,765    | 48 | ,000 |
|        | Block | 333,765    | 48 | ,000 |
|        | Model | 333,765    | 48 | ,000 |

**Model Summary**

| Step | -2 Log likelihood    | Cox & Snell R Square | Nagelkerke R Square |
|------|----------------------|----------------------|---------------------|
| 1    | 5863,11 <sup>a</sup> | ,026                 | ,067                |

a. Estimation terminated at iteration number 7 because parameter estimates changed by less than ,001.

**Classification Table<sup>a</sup>**

|                    |                                                |                                                              | Predicted                                    |
|--------------------|------------------------------------------------|--------------------------------------------------------------|----------------------------------------------|
|                    |                                                |                                                              | luonnelt1<br>luonne<br>highest = ...         |
| Observed           |                                                |                                                              | 0 ingen<br>händelse<br>eller läheltä<br>piti |
| Step 1             | luonnelt1 luonne highest = tapahtui potilaalle | 0 ingen händelse eller läheltä piti<br>1 tapahtui potilaalle | 11627<br>848                                 |
| Overall Percentage |                                                |                                                              |                                              |

**Classification Table<sup>a</sup>**

|                    |                                                |                                                              | Predicted                            |
|--------------------|------------------------------------------------|--------------------------------------------------------------|--------------------------------------|
|                    |                                                |                                                              | luonnelt1<br>luonne<br>highest = ... |
| Observed           |                                                |                                                              | 1 tapahtui<br>potilaalle             |
| Step 1             | luonnelt1 luonne highest = tapahtui potilaalle | 0 ingen händelse eller läheltä piti<br>1 tapahtui potilaalle | 0<br>0                               |
| Overall Percentage |                                                |                                                              |                                      |

Classification Table<sup>a</sup>

|                    |                                                |                                                              | Predicted          |
|--------------------|------------------------------------------------|--------------------------------------------------------------|--------------------|
| Observed           |                                                |                                                              | Percentage Correct |
| Step 1             | luonnelt1 luonne highest = tapahtui potilaalle | 0 ingen händelse eller läheltä piti<br>1 tapahtui potilaalle | 100,0<br>,0        |
| Overall Percentage |                                                |                                                              | 93,2               |

a. The cut value is ,500

Variables in the Equation

|                     |            | B      | S.E. | Wald    | df | Sig. | Exp(B) | 95% C.I. for EXP(B) |       |
|---------------------|------------|--------|------|---------|----|------|--------|---------------------|-------|
|                     |            |        |      |         |    |      |        | Lower               | Upper |
| Step 1 <sup>a</sup> | sv3        |        |      | 2,302   | 2  | ,316 |        |                     |       |
|                     | sv3(1)     | -,017  | ,107 | ,026    | 1  | ,873 | ,983   | ,797                | 1,212 |
|                     | sv3(2)     | ,137   | ,104 | 1,734   | 1  | ,188 | 1,146  | ,935                | 1,405 |
|                     | VASTY2     |        |      | 233,198 | 35 | ,000 |        |                     |       |
|                     | VASTY2(1)  | ,063   | ,300 | ,044    | 1  | ,834 | 1,065  | ,591                | 1,918 |
|                     | VASTY2(2)  | ,506   | ,278 | 3,304   | 1  | ,069 | 1,659  | ,961                | 2,863 |
|                     | VASTY2(3)  | -1,377 | ,465 | 8,767   | 1  | ,003 | ,252   | ,101                | ,628  |
|                     | VASTY2(4)  | ,216   | ,292 | ,548    | 1  | ,459 | 1,242  | ,700                | 2,202 |
|                     | VASTY2(5)  | -,127  | ,326 | ,152    | 1  | ,696 | ,880   | ,464                | 1,669 |
|                     | VASTY2(6)  | -1,326 | ,443 | 8,975   | 1  | ,003 | ,266   | ,112                | ,632  |
|                     | VASTY2(7)  | ,655   | ,272 | 5,778   | 1  | ,016 | 1,925  | 1,128               | 3,283 |
|                     | VASTY2(8)  | -,172  | ,320 | ,287    | 1  | ,592 | ,842   | ,449                | 1,578 |
|                     | VASTY2(9)  | ,316   | ,290 | 1,185   | 1  | ,276 | 1,372  | ,776                | 2,424 |
|                     | VASTY2(10) | ,992   | ,264 | 14,138  | 1  | ,000 | 2,697  | 1,608               | 4,523 |
|                     | VASTY2(11) | ,633   | ,272 | 5,405   | 1  | ,020 | 1,883  | 1,104               | 3,211 |
|                     | VASTY2(12) | ,103   | ,298 | ,120    | 1  | ,729 | 1,109  | ,618                | 1,987 |
|                     | VASTY2(13) | ,984   | ,265 | 13,793  | 1  | ,000 | 2,676  | 1,592               | 4,498 |
|                     | VASTY2(14) | -,254  | ,321 | ,625    | 1  | ,429 | ,776   | ,413                | 1,456 |
|                     | VASTY2(15) | ,211   | ,292 | ,521    | 1  | ,470 | 1,235  | ,696                | 2,190 |
|                     | VASTY2(16) | ,385   | ,331 | 1,351   | 1  | ,245 | 1,469  | ,768                | 2,811 |
|                     | VASTY2(17) | -1,089 | ,418 | 6,776   | 1  | ,009 | ,337   | ,148                | ,764  |
|                     | VASTY2(18) | -,626  | ,371 | 2,847   | 1  | ,092 | ,535   | ,258                | 1,106 |
|                     | VASTY2(19) | -1,757 | ,552 | 10,144  | 1  | ,001 | ,173   | ,059                | ,509  |
|                     | VASTY2(20) | ,033   | ,315 | ,011    | 1  | ,915 | 1,034  | ,558                | 1,917 |
|                     | VASTY2(21) | -,079  | ,312 | ,063    | 1  | ,801 | ,924   | ,501                | 1,704 |
|                     | VASTY2(22) | ,247   | ,290 | ,727    | 1  | ,394 | 1,280  | ,725                | 2,260 |
|                     | VASTY2(23) | ,278   | ,288 | ,933    | 1  | ,334 | 1,321  | ,751                | 2,324 |

Variables in the Equation

|            | B      | S.E. | Wald    | df | Sig. | Exp(B) | 95% C.I. for EXP(B) |       |
|------------|--------|------|---------|----|------|--------|---------------------|-------|
|            |        |      |         |    |      |        | Lower               | Upper |
| VASTY2(24) | ,307   | ,285 | 1,157   | 1  | ,282 | 1,359  | ,777                | 2,376 |
| VASTY2(25) | ,318   | ,302 | 1,111   | 1  | ,292 | 1,375  | ,761                | 2,484 |
| VASTY2(26) | -,922  | ,419 | 4,848   | 1  | ,028 | ,398   | ,175                | ,904  |
| VASTY2(27) | -1,475 | ,467 | 9,986   | 1  | ,002 | ,229   | ,092                | ,571  |
| VASTY2(28) | -1,043 | ,472 | 4,893   | 1  | ,027 | ,352   | ,140                | ,888  |
| VASTY2(29) | -1,106 | ,407 | 7,398   | 1  | ,007 | ,331   | ,149                | ,734  |
| VASTY2(30) | -,146  | ,317 | ,212    | 1  | ,645 | ,864   | ,465                | 1,608 |
| VASTY2(31) | ,541   | ,284 | 3,632   | 1  | ,057 | 1,718  | ,985                | 2,997 |
| VASTY2(32) | -,055  | ,320 | ,030    | 1  | ,863 | ,946   | ,505                | 1,772 |
| VASTY2(33) | ,034   | ,313 | ,012    | 1  | ,913 | 1,035  | ,560                | 1,913 |
| VASTY2(34) | -1,254 | ,439 | 8,181   | 1  | ,004 | ,285   | ,121                | ,674  |
| VASTY2(35) | ,688   | ,276 | 6,204   | 1  | ,013 | 1,991  | 1,158               | 3,422 |
| weekday    |        |      | 13,128  | 6  | ,041 |        |                     |       |
| weekday(1) | -,007  | ,129 | ,003    | 1  | ,958 | ,993   | ,771                | 1,279 |
| weekday(2) | -,028  | ,130 | ,047    | 1  | ,828 | ,972   | ,753                | 1,254 |
| weekday(3) | -,039  | ,131 | ,087    | 1  | ,768 | ,962   | ,745                | 1,243 |
| weekday(4) | ,042   | ,129 | ,108    | 1  | ,743 | 1,043  | ,810                | 1,344 |
| weekday(5) | -,239  | ,139 | 2,932   | 1  | ,087 | ,788   | ,599                | 1,035 |
| weekday(6) | -,376  | ,143 | 6,871   | 1  | ,009 | ,687   | ,518                | ,910  |
| holiday(1) | -,451  | ,253 | 3,175   | 1  | ,075 | ,637   | ,388                | 1,046 |
| season     |        |      | 4,327   | 4  | ,364 |        |                     |       |
| season(1)  | -,120  | ,113 | 1,130   | 1  | ,288 | ,886   | ,710                | 1,107 |
| season(2)  | -,137  | ,106 | 1,687   | 1  | ,194 | ,872   | ,709                | 1,072 |
| season(3)  | ,061   | ,108 | ,322    | 1  | ,570 | 1,063  | ,860                | 1,315 |
| season(4)  | -,084  | ,115 | ,537    | 1  | ,463 | ,919   | ,734                | 1,152 |
| Constant   | -2,572 | ,244 | 110,717 | 1  | ,000 | ,076   |                     |       |

a. Variable(s) entered on step 1: sv3, VASTY2, weekday, holiday, season.

```
LOGISTIC REGRESSION VARIABLES luonnelt1
/METHOD=ENTER sv5 VASTY2 weekday holiday season
/CONTRAST (sv5)=Indicator(1)
/CONTRAST (VASTY2)=Indicator(1)
/CONTRAST (weekday)=Indicator(1)
/CONTRAST (holiday)=Indicator(1)
/CONTRAST (season)=Indicator(1)
/PRINT=CI(95)
/CRITERIA=PIN(0.05) POUT(0.10) ITERATE(20) CUT(0.5).
```

**Block 1: Method = Enter**

**Omnibus Tests of Model Coefficients**

|        |       | Chi-square | df | Sig. |
|--------|-------|------------|----|------|
| Step 1 | Step  | 334,570    | 50 | ,000 |
|        | Block | 334,570    | 50 | ,000 |
|        | Model | 334,570    | 50 | ,000 |

**Model Summary**

| Step | -2 Log likelihood    | Cox & Snell R Square | Nagelkerke R Square |
|------|----------------------|----------------------|---------------------|
| 1    | 5862,30 <sup>a</sup> | ,026                 | ,068                |

a. Estimation terminated at iteration number 7 because parameter estimates changed by less than ,001.

**Classification Table<sup>a</sup>**

|                    |                                                |                                                              | Predicted                                    |
|--------------------|------------------------------------------------|--------------------------------------------------------------|----------------------------------------------|
|                    |                                                |                                                              | luonnelt1<br>luonne<br>highest = ...         |
| Observed           |                                                |                                                              | 0 ingen<br>händelse<br>eller läheltä<br>piti |
| Step 1             | luonnelt1 luonne highest = tapahtui potilaalle | 0 ingen händelse eller läheltä piti<br>1 tapahtui potilaalle | 11627<br>848                                 |
| Overall Percentage |                                                |                                                              |                                              |

**Classification Table<sup>a</sup>**

|                    |                                                |                                                              | Predicted                            |
|--------------------|------------------------------------------------|--------------------------------------------------------------|--------------------------------------|
|                    |                                                |                                                              | luonnelt1<br>luonne<br>highest = ... |
| Observed           |                                                |                                                              | 1 tapahtui<br>potilaalle             |
| Step 1             | luonnelt1 luonne highest = tapahtui potilaalle | 0 ingen händelse eller läheltä piti<br>1 tapahtui potilaalle | 0<br>0                               |
| Overall Percentage |                                                |                                                              |                                      |

Classification Table<sup>a</sup>

|                    |                                                |                                                              | Predicted          |
|--------------------|------------------------------------------------|--------------------------------------------------------------|--------------------|
| Observed           |                                                |                                                              | Percentage Correct |
| Step 1             | luonnelt1 luonne highest = tapahtui potilaalle | 0 ingen händelse eller läheltä piti<br>1 tapahtui potilaalle | 100,0<br>,0        |
| Overall Percentage |                                                |                                                              | 93,2               |

a. The cut value is ,500

Variables in the Equation

|                     |            | B      | S.E. | Wald    | df | Sig. | Exp(B) | 95% C.I. for EXP(B) |       |
|---------------------|------------|--------|------|---------|----|------|--------|---------------------|-------|
|                     |            |        |      |         |    |      |        | Lower               | Upper |
| Step 1 <sup>a</sup> | sv5        |        |      | 3,122   | 4  | ,538 |        |                     |       |
|                     | sv5(1)     | -,028  | ,135 | ,043    | 1  | ,835 | ,972   | ,747                | 1,266 |
|                     | sv5(2)     | -,011  | ,137 | ,007    | 1  | ,934 | ,989   | ,757                | 1,292 |
|                     | sv5(3)     | -,003  | ,125 | ,001    | 1  | ,980 | ,997   | ,781                | 1,273 |
|                     | sv5(4)     | ,179   | ,135 | 1,765   | 1  | ,184 | 1,196  | ,918                | 1,557 |
|                     | VASTY2     |        |      | 233,751 | 35 | ,000 |        |                     |       |
|                     | VASTY2(1)  | ,060   | ,300 | ,040    | 1  | ,842 | 1,062  | ,589                | 1,913 |
|                     | VASTY2(2)  | ,480   | ,281 | 2,925   | 1  | ,087 | 1,616  | ,932                | 2,802 |
|                     | VASTY2(3)  | -1,387 | ,465 | 8,894   | 1  | ,003 | ,250   | ,100                | ,622  |
|                     | VASTY2(4)  | ,215   | ,292 | ,542    | 1  | ,462 | 1,240  | ,699                | 2,199 |
|                     | VASTY2(5)  | -,146  | ,327 | ,199    | 1  | ,656 | ,865   | ,456                | 1,640 |
|                     | VASTY2(6)  | -1,377 | ,446 | 9,521   | 1  | ,002 | ,252   | ,105                | ,605  |
|                     | VASTY2(7)  | ,652   | ,272 | 5,729   | 1  | ,017 | 1,919  | 1,125               | 3,273 |
|                     | VASTY2(8)  | -,189  | ,321 | ,349    | 1  | ,555 | ,827   | ,441                | 1,552 |
|                     | VASTY2(9)  | ,320   | ,290 | 1,217   | 1  | ,270 | 1,378  | ,780                | 2,434 |
|                     | VASTY2(10) | ,961   | ,267 | 12,923  | 1  | ,000 | 2,613  | 1,548               | 4,412 |
|                     | VASTY2(11) | ,627   | ,272 | 5,308   | 1  | ,021 | 1,873  | 1,098               | 3,193 |
|                     | VASTY2(12) | ,095   | ,299 | ,102    | 1  | ,750 | 1,100  | ,613                | 1,975 |
|                     | VASTY2(13) | ,951   | ,269 | 12,512  | 1  | ,000 | 2,588  | 1,528               | 4,384 |
|                     | VASTY2(14) | -,270  | ,322 | ,700    | 1  | ,403 | ,764   | ,406                | 1,436 |
|                     | VASTY2(15) | ,189   | ,294 | ,412    | 1  | ,521 | 1,208  | ,679                | 2,150 |
|                     | VASTY2(16) | ,361   | ,332 | 1,179   | 1  | ,278 | 1,434  | ,748                | 2,750 |
|                     | VASTY2(17) | -1,100 | ,418 | 6,919   | 1  | ,009 | ,333   | ,147                | ,755  |
|                     | VASTY2(18) | -,643  | ,376 | 2,934   | 1  | ,087 | ,525   | ,252                | 1,097 |
|                     | VASTY2(19) | -1,774 | ,555 | 10,209  | 1  | ,001 | ,170   | ,057                | ,504  |
|                     | VASTY2(20) | ,004   | ,317 | ,000    | 1  | ,991 | 1,004  | ,539                | 1,867 |
|                     | VASTY2(21) | -,089  | ,312 | ,082    | 1  | ,774 | ,914   | ,496                | 1,686 |

**Variables in the Equation**

|            | B      | S.E. | Wald    | df | Sig. | Exp(B) | 95% C.I. for EXP(B) |       |
|------------|--------|------|---------|----|------|--------|---------------------|-------|
|            |        |      |         |    |      |        | Lower               | Upper |
| VASTY2(22) | ,245   | ,290 | ,713    | 1  | ,398 | 1,277  | ,724                | 2,255 |
| VASTY2(23) | ,270   | ,288 | ,877    | 1  | ,349 | 1,310  | ,744                | 2,306 |
| VASTY2(24) | ,296   | ,285 | 1,075   | 1  | ,300 | 1,344  | ,768                | 2,353 |
| VASTY2(25) | ,300   | ,302 | ,982    | 1  | ,322 | 1,349  | ,746                | 2,440 |
| VASTY2(26) | -,924  | ,419 | 4,862   | 1  | ,027 | ,397   | ,175                | ,902  |
| VASTY2(27) | -1,495 | ,468 | 10,220  | 1  | ,001 | ,224   | ,090                | ,561  |
| VASTY2(28) | -1,107 | ,477 | 5,401   | 1  | ,020 | ,330   | ,130                | ,841  |
| VASTY2(29) | -1,174 | ,413 | 8,084   | 1  | ,004 | ,309   | ,138                | ,694  |
| VASTY2(30) | -,156  | ,317 | ,242    | 1  | ,623 | ,856   | ,460                | 1,592 |
| VASTY2(31) | ,522   | ,287 | 3,313   | 1  | ,069 | 1,686  | ,961                | 2,958 |
| VASTY2(32) | -,072  | ,325 | ,050    | 1  | ,823 | ,930   | ,492                | 1,758 |
| VASTY2(33) | ,018   | ,319 | ,003    | 1  | ,956 | 1,018  | ,544                | 1,903 |
| VASTY2(34) | -1,257 | ,439 | 8,215   | 1  | ,004 | ,285   | ,120                | ,672  |
| VASTY2(35) | ,692   | ,277 | 6,254   | 1  | ,012 | 1,998  | 1,161               | 3,436 |
| weekday    |        |      | 13,104  | 6  | ,041 |        |                     |       |
| weekday(1) | -,004  | ,129 | ,001    | 1  | ,976 | ,996   | ,773                | 1,283 |
| weekday(2) | -,027  | ,130 | ,043    | 1  | ,836 | ,973   | ,754                | 1,256 |
| weekday(3) | -,040  | ,131 | ,095    | 1  | ,758 | ,961   | ,744                | 1,241 |
| weekday(4) | ,043   | ,129 | ,111    | 1  | ,739 | 1,044  | ,810                | 1,345 |
| weekday(5) | -,236  | ,140 | 2,854   | 1  | ,091 | ,790   | ,601                | 1,038 |
| weekday(6) | -,376  | ,144 | 6,879   | 1  | ,009 | ,686   | ,518                | ,909  |
| holiday(1) | -,454  | ,253 | 3,218   | 1  | ,073 | ,635   | ,387                | 1,043 |
| season     |        |      | 4,099   | 4  | ,393 |        |                     |       |
| season(1)  | -,118  | ,113 | 1,091   | 1  | ,296 | ,888   | ,711                | 1,109 |
| season(2)  | -,135  | ,106 | 1,613   | 1  | ,204 | ,874   | ,710                | 1,076 |
| season(3)  | ,059   | ,108 | ,301    | 1  | ,583 | 1,061  | ,858                | 1,312 |
| season(4)  | -,080  | ,115 | ,486    | 1  | ,486 | ,923   | ,736                | 1,156 |
| Constant   | -2,546 | ,252 | 102,291 | 1  | ,000 | ,078   |                     |       |

a. Variable(s) entered on step 1: sv5, VASTY2, weekday, holiday, season.

```
LOGISTIC REGRESSION VARIABLES luonnelt1
/METHOD=ENTER sv7 VASTY2 weekday holiday season
/CONTRAST (sv7)=Indicator(1)
/CONTRAST (VASTY2)=Indicator(1)
/CONTRAST (weekday)=Indicator(1)
/CONTRAST (holiday)=Indicator(1)
/CONTRAST (season)=Indicator(1)
/PRINT=CI(95)
```



/CRITERIA=PIN(0.05) POUT(0.10) ITERATE(20) CUT(0.5).

### Block 1: Method = Enter

#### Omnibus Tests of Model Coefficients

|        |       | Chi-square | df | Sig. |
|--------|-------|------------|----|------|
| Step 1 | Step  | 336,551    | 52 | ,000 |
|        | Block | 336,551    | 52 | ,000 |
|        | Model | 336,551    | 52 | ,000 |

#### Model Summary

| Step | -2 Log likelihood    | Cox & Snell R Square | Nagelkerke R Square |
|------|----------------------|----------------------|---------------------|
| 1    | 5860,32 <sup>a</sup> | ,027                 | ,068                |

a. Estimation terminated at iteration number 7 because parameter estimates changed by less than ,001.

#### Classification Table<sup>a</sup>

|        |                                                | Predicted                      |                                     |
|--------|------------------------------------------------|--------------------------------|-------------------------------------|
|        |                                                | luonnelt1 luonne highest = ... | 0 ingen händelse eller läheltä piti |
|        | Observed                                       |                                |                                     |
| Step 1 | luonnelt1 luonne highest = tapahtui potilaalle | 11627                          | 848                                 |
|        | Overall Percentage                             |                                |                                     |

#### Classification Table<sup>a</sup>

|        |                                                | Predicted                      |                       |
|--------|------------------------------------------------|--------------------------------|-----------------------|
|        |                                                | luonnelt1 luonne highest = ... | 1 tapahtui potilaalle |
|        | Observed                                       |                                |                       |
| Step 1 | luonnelt1 luonne highest = tapahtui potilaalle | 0                              | 0                     |
|        | Overall Percentage                             |                                |                       |

Classification Table<sup>a</sup>

|                    |                                                |                                                              | Predicted          |
|--------------------|------------------------------------------------|--------------------------------------------------------------|--------------------|
| Observed           |                                                |                                                              | Percentage Correct |
| Step 1             | luonnelt1 luonne highest = tapahtui potilaalle | 0 ingen händelse eller läheltä piti<br>1 tapahtui potilaalle | 100,0<br>,0        |
| Overall Percentage |                                                |                                                              | 93,2               |

a. The cut value is ,500

Variables in the Equation

|                         | B      | S.E. | Wald    | df | Sig. | Exp(B) | 95% C.I. for EXP(B) |       |
|-------------------------|--------|------|---------|----|------|--------|---------------------|-------|
|                         |        |      |         |    |      |        | Lower               | Upper |
| Step 1 <sup>a</sup> sv7 |        |      | 5,111   | 6  | ,530 |        |                     |       |
| sv7(1)                  | -,176  | ,153 | 1,330   | 1  | ,249 | ,838   | ,622                | 1,131 |
| sv7(2)                  | -,069  | ,158 | ,189    | 1  | ,663 | ,933   | ,684                | 1,273 |
| sv7(3)                  | -,100  | ,156 | ,408    | 1  | ,523 | ,905   | ,666                | 1,229 |
| sv7(4)                  | -,068  | ,147 | ,215    | 1  | ,643 | ,934   | ,701                | 1,245 |
| sv7(5)                  | -,032  | ,139 | ,052    | 1  | ,819 | ,969   | ,738                | 1,272 |
| sv7(6)                  | ,172   | ,155 | 1,227   | 1  | ,268 | 1,187  | ,876                | 1,609 |
| VASTY2                  |        |      | 233,612 | 35 | ,000 |        |                     |       |
| VASTY2(1)               | ,073   | ,301 | ,059    | 1  | ,808 | 1,076  | ,597                | 1,940 |
| VASTY2(2)               | ,473   | ,281 | 2,830   | 1  | ,093 | 1,605  | ,925                | 2,785 |
| VASTY2(3)               | -1,392 | ,465 | 8,962   | 1  | ,003 | ,249   | ,100                | ,618  |
| VASTY2(4)               | ,216   | ,293 | ,547    | 1  | ,459 | 1,242  | ,700                | 2,203 |
| VASTY2(5)               | -,128  | ,327 | ,154    | 1  | ,695 | ,880   | ,464                | 1,668 |
| VASTY2(6)               | -1,417 | ,449 | 9,952   | 1  | ,002 | ,242   | ,101                | ,585  |
| VASTY2(7)               | ,652   | ,272 | 5,733   | 1  | ,017 | 1,920  | 1,126               | 3,274 |
| VASTY2(8)               | -,189  | ,321 | ,345    | 1  | ,557 | ,828   | ,442                | 1,554 |
| VASTY2(9)               | ,318   | ,290 | 1,196   | 1  | ,274 | 1,374  | ,778                | 2,428 |
| VASTY2(10)              | ,952   | ,268 | 12,619  | 1  | ,000 | 2,590  | 1,532               | 4,379 |
| VASTY2(11)              | ,635   | ,273 | 5,425   | 1  | ,020 | 1,887  | 1,106               | 3,220 |
| VASTY2(12)              | ,097   | ,298 | ,106    | 1  | ,745 | 1,102  | ,614                | 1,978 |
| VASTY2(13)              | ,938   | ,270 | 12,073  | 1  | ,001 | 2,554  | 1,505               | 4,335 |
| VASTY2(14)              | -,272  | ,322 | ,709    | 1  | ,400 | ,762   | ,405                | 1,434 |
| VASTY2(15)              | ,180   | ,295 | ,373    | 1  | ,541 | 1,198  | ,672                | 2,135 |
| VASTY2(16)              | ,357   | ,333 | 1,153   | 1  | ,283 | 1,430  | ,744                | 2,745 |
| VASTY2(17)              | -1,093 | ,418 | 6,818   | 1  | ,009 | ,335   | ,148                | ,761  |
| VASTY2(18)              | -,567  | ,379 | 2,246   | 1  | ,134 | ,567   | ,270                | 1,191 |
| VASTY2(19)              | -1,692 | ,558 | 9,192   | 1  | ,002 | ,184   | ,062                | ,550  |

**Variables in the Equation**

|            | B      | S.E. | Wald   | df | Sig. | Exp(B) | 95% C.I. for EXP(B) |       |
|------------|--------|------|--------|----|------|--------|---------------------|-------|
|            |        |      |        |    |      |        | Lower               | Upper |
| VASTY2(20) | -,008  | ,318 | ,001   | 1  | ,981 | ,992   | ,533                | 1,849 |
| VASTY2(21) | -,084  | ,312 | ,073   | 1  | ,787 | ,919   | ,499                | 1,694 |
| VASTY2(22) | ,246   | ,290 | ,723   | 1  | ,395 | 1,280  | ,725                | 2,259 |
| VASTY2(23) | ,277   | ,288 | ,925   | 1  | ,336 | 1,320  | ,750                | 2,322 |
| VASTY2(24) | ,296   | ,286 | 1,077  | 1  | ,299 | 1,345  | ,768                | 2,354 |
| VASTY2(25) | ,309   | ,302 | 1,048  | 1  | ,306 | 1,363  | ,754                | 2,464 |
| VASTY2(26) | -,920  | ,419 | 4,824  | 1  | ,028 | ,398   | ,175                | ,906  |
| VASTY2(27) | -1,507 | ,468 | 10,356 | 1  | ,001 | ,222   | ,088                | ,555  |
| VASTY2(28) | -1,157 | ,480 | 5,805  | 1  | ,016 | ,314   | ,123                | ,806  |
| VASTY2(29) | -1,228 | ,418 | 8,647  | 1  | ,003 | ,293   | ,129                | ,664  |
| VASTY2(30) | -,147  | ,317 | ,216   | 1  | ,642 | ,863   | ,464                | 1,606 |
| VASTY2(31) | ,576   | ,288 | 4,009  | 1  | ,045 | 1,779  | 1,012               | 3,126 |
| VASTY2(32) | ,004   | ,328 | ,000   | 1  | ,991 | 1,004  | ,527                | 1,911 |
| VASTY2(33) | ,100   | ,325 | ,094   | 1  | ,759 | 1,105  | ,585                | 2,087 |
| VASTY2(34) | -1,256 | ,439 | 8,196  | 1  | ,004 | ,285   | ,121                | ,673  |
| VASTY2(35) | ,701   | ,277 | 6,408  | 1  | ,011 | 2,016  | 1,172               | 3,471 |
| weekday    |        |      | 12,752 | 6  | ,047 |        |                     |       |
| weekday(1) | -,004  | ,129 | ,001   | 1  | ,972 | ,996   | ,773                | 1,283 |
| weekday(2) | -,025  | ,130 | ,038   | 1  | ,845 | ,975   | ,755                | 1,258 |
| weekday(3) | -,039  | ,131 | ,089   | 1  | ,766 | ,962   | ,745                | 1,242 |
| weekday(4) | ,046   | ,129 | ,127   | 1  | ,721 | 1,047  | ,813                | 1,349 |
| weekday(5) | -,230  | ,140 | 2,718  | 1  | ,099 | ,794   | ,604                | 1,044 |
| weekday(6) | -,371  | ,144 | 6,677  | 1  | ,010 | ,690   | ,521                | ,914  |
| holiday(1) | -,443  | ,253 | 3,063  | 1  | ,080 | ,642   | ,391                | 1,055 |
| season     |        |      | 3,705  | 4  | ,447 |        |                     |       |
| season(1)  | -,116  | ,113 | 1,048  | 1  | ,306 | ,890   | ,713                | 1,112 |
| season(2)  | -,124  | ,106 | 1,368  | 1  | ,242 | ,883   | ,717                | 1,088 |
| season(3)  | ,058   | ,108 | ,288   | 1  | ,592 | 1,060  | ,857                | 1,311 |
| season(4)  | -,077  | ,115 | ,453   | 1  | ,501 | ,925   | ,739                | 1,160 |
| Constant   | -2,485 | ,256 | 94,351 | 1  | ,000 | ,083   |                     |       |

a. Variable(s) entered on step 1: sv7, VASTY2, weekday, holiday, season.

\*\*

```
LOGISTIC REGRESSION VARIABLES seurauslt3
/METHOD=ENTER bv1 VASTY2 weekday holiday season
/CONTRAST (bv1)=Indicator(1)
/CONTRAST (VASTY2)=Indicator(1)
```

```

/CONTRAST (weekday)=Indicator(1)
/CONTRAST (holiday)=Indicator(1)
/CONTRAST (season)=Indicator(1)
/PRINT=CI(95)
/CRITERIA=PIN(0.05) POUT(0.10) ITERATE(20) CUT(0.5).

```

## Block 1: Method = Enter

### Omnibus Tests of Model Coefficients

|        |       | Chi-square | df | Sig. |
|--------|-------|------------|----|------|
| Step 1 | Step  | 327,914    | 48 | ,000 |
|        | Block | 327,914    | 48 | ,000 |
|        | Model | 327,914    | 48 | ,000 |

### Model Summary

| Step | -2 Log likelihood    | Cox & Snell R Square | Nagelkerke R Square |
|------|----------------------|----------------------|---------------------|
| 1    | 3211,14 <sup>a</sup> | ,026                 | ,105                |

a. Estimation terminated at iteration number 9 because parameter estimates changed by less than ,001.

### Classification Table<sup>a</sup>

|                    |                                                    | Predicted                                                    |                                   |
|--------------------|----------------------------------------------------|--------------------------------------------------------------|-----------------------------------|
|                    |                                                    | seurauslt3 seuraus highest = ...                             | 0 ingen händelse eller ei haittaa |
|                    | Observed                                           |                                                              |                                   |
| Step 1             | seurauslt3 seuraus highest = haitta (i någon form) | 0 ingen händelse eller ei haittaa<br>1 haitta (i någon form) | 12075<br>400                      |
| Overall Percentage |                                                    |                                                              |                                   |

**Classification Table<sup>a</sup>**

| Observed           |                                                    | Predicted                         |                         |
|--------------------|----------------------------------------------------|-----------------------------------|-------------------------|
|                    |                                                    | seurauslt3 seuraus highest = ...  | 1 haitta (i någon form) |
| Step 1             | seurauslt3 seuraus highest = haitta (i någon form) | 0 ingen händelse eller ei haittaa | 0                       |
|                    |                                                    | 1 haitta (i någon form)           | 0                       |
| Overall Percentage |                                                    |                                   |                         |

**Classification Table<sup>a</sup>**

| Observed           |                                                    | Predicted                         |       |
|--------------------|----------------------------------------------------|-----------------------------------|-------|
|                    |                                                    | Percentage Correct                |       |
| Step 1             | seurauslt3 seuraus highest = haitta (i någon form) | 0 ingen händelse eller ei haittaa | 100,0 |
|                    |                                                    | 1 haitta (i någon form)           | ,0    |
| Overall Percentage |                                                    |                                   | 96,8  |

a. The cut value is ,500

**Variables in the Equation**

|                         | B      | S.E.  | Wald    | df | Sig. | Exp(B) | 95% C.I. for EXP(B) |       |
|-------------------------|--------|-------|---------|----|------|--------|---------------------|-------|
|                         |        |       |         |    |      |        | Lower               | Upper |
| Step 1 <sup>a</sup> bv1 |        |       | 2,915   | 2  | ,233 |        |                     |       |
| bv1(1)                  | -,164  | ,149  | 1,207   | 1  | ,272 | ,849   | ,633                | 1,137 |
| bv1(2)                  | ,107   | ,121  | ,784    | 1  | ,376 | 1,113  | ,878                | 1,411 |
| VASTY2                  |        |       | 227,323 | 35 | ,000 |        |                     |       |
| VASTY2(1)               | ,601   | ,424  | 2,008   | 1  | ,156 | 1,824  | ,794                | 4,188 |
| VASTY2(2)               | 1,205  | ,390  | 9,552   | 1  | ,002 | 3,337  | 1,554               | 7,166 |
| VASTY2(3)               | -1,621 | ,788  | 4,230   | 1  | ,040 | ,198   | ,042                | ,927  |
| VASTY2(4)               | ,455   | ,432  | 1,113   | 1  | ,292 | 1,577  | ,677                | 3,674 |
| VASTY2(5)               | ,451   | ,442  | 1,041   | 1  | ,308 | 1,569  | ,660                | 3,731 |
| VASTY2(6)               | -1,580 | ,787  | 4,035   | 1  | ,045 | ,206   | ,044                | ,962  |
| VASTY2(7)               | ,569   | ,426  | 1,786   | 1  | ,181 | 1,767  | ,767                | 4,069 |
| VASTY2(8)               | ,249   | ,449  | ,308    | 1  | ,579 | 1,283  | ,532                | 3,090 |
| VASTY2(9)               | 1,093  | ,398  | 7,532   | 1  | ,006 | 2,984  | 1,367               | 6,515 |
| VASTY2(10)              | 1,458  | ,381  | 14,666  | 1  | ,000 | 4,299  | 2,038               | 9,070 |
| VASTY2(11)              | 1,130  | ,393  | 8,254   | 1  | ,004 | 3,096  | 1,432               | 6,694 |
| VASTY2(12)              | ,613   | ,420  | 2,129   | 1  | ,145 | 1,847  | ,810                | 4,211 |
| VASTY2(13)              | 1,441  | ,383  | 14,149  | 1  | ,000 | 4,225  | 1,994               | 8,952 |
| VASTY2(14)              | ,158   | ,457  | ,120    | 1  | ,729 | 1,172  | ,478                | 2,872 |
| VASTY2(15)              | -1,566 | ,786  | 3,969   | 1  | ,046 | ,209   | ,045                | ,975  |
| VASTY2(16)              | -,502  | ,675  | ,554    | 1  | ,457 | ,605   | ,161                | 2,272 |
| VASTY2(17)              | -,252  | ,510  | ,244    | 1  | ,621 | ,777   | ,286                | 2,113 |
| VASTY2(18)              | -1,113 | ,672  | 2,749   | 1  | ,097 | ,328   | ,088                | 1,225 |
| VASTY2(19)              | -2,106 | 1,061 | 3,942   | 1  | ,047 | ,122   | ,015                | ,973  |
| VASTY2(20)              | ,428   | ,451  | ,902    | 1  | ,342 | 1,534  | ,634                | 3,712 |
| VASTY2(21)              | -1,553 | ,786  | 3,904   | 1  | ,048 | ,212   | ,045                | ,988  |
| VASTY2(22)              | -,777  | ,607  | 1,642   | 1  | ,200 | ,460   | ,140                | 1,509 |
| VASTY2(23)              | ,199   | ,456  | ,190    | 1  | ,663 | 1,220  | ,499                | 2,984 |
| VASTY2(24)              | -,915  | ,608  | 2,270   | 1  | ,132 | ,400   | ,122                | 1,317 |
| VASTY2(25)              | -1,333 | ,786  | 2,877   | 1  | ,090 | ,264   | ,056                | 1,231 |
| VASTY2(26)              | -2,073 | 1,058 | 3,840   | 1  | ,050 | ,126   | ,016                | 1,000 |
| VASTY2(27)              | -,897  | ,607  | 2,182   | 1  | ,140 | ,408   | ,124                | 1,341 |
| VASTY2(28)              | -,168  | ,567  | ,088    | 1  | ,767 | ,846   | ,278                | 2,569 |
| VASTY2(29)              | -,470  | ,533  | ,778    | 1  | ,378 | ,625   | ,220                | 1,777 |
| VASTY2(30)              | -,305  | ,510  | ,358    | 1  | ,550 | ,737   | ,271                | 2,004 |
| VASTY2(31)              | 1,234  | ,390  | 10,020  | 1  | ,002 | 3,437  | 1,600               | 7,380 |
| VASTY2(32)              | -,242  | ,511  | ,224    | 1  | ,636 | ,785   | ,288                | 2,138 |
| VASTY2(33)              | -,264  | ,511  | ,267    | 1  | ,605 | ,768   | ,282                | 2,090 |
| VASTY2(34)              | -1,152 | ,671  | 2,946   | 1  | ,086 | ,316   | ,085                | 1,178 |
| VASTY2(35)              | ,052   | ,482  | ,012    | 1  | ,913 | 1,054  | ,410                | 2,710 |
| weekday                 |        |       | 12,250  | 6  | ,057 |        |                     |       |
| weekday(1)              | ,221   | ,185  | 1,422   | 1  | ,233 | 1,247  | ,867                | 1,794 |
| weekday(2)              | -,015  | ,195  | ,006    | 1  | ,940 | ,986   | ,673                | 1,444 |

**Variables in the Equation**

|            | B      | S.E. | Wald   | df | Sig. | Exp(B) | 95% C.I. for EXP(B) |       |
|------------|--------|------|--------|----|------|--------|---------------------|-------|
|            |        |      |        |    |      |        | Lower               | Upper |
| weekday(3) | ,081   | ,191 | ,178   | 1  | ,673 | 1,084  | ,745                | 1,576 |
| weekday(4) | ,240   | ,186 | 1,669  | 1  | ,196 | 1,272  | ,883                | 1,831 |
| weekday(5) | -,051  | ,200 | ,064   | 1  | ,800 | ,951   | ,643                | 1,406 |
| weekday(6) | -,400  | ,217 | 3,386  | 1  | ,066 | ,670   | ,438                | 1,026 |
| holiday(1) | -,468  | ,372 | 1,579  | 1  | ,209 | ,626   | ,302                | 1,299 |
| season     |        |      | 10,214 | 4  | ,037 |        |                     |       |
| season(1)  | -,203  | ,162 | 1,567  | 1  | ,211 | ,816   | ,594                | 1,122 |
| season(2)  | -,082  | ,146 | ,313   | 1  | ,576 | ,921   | ,692                | 1,227 |
| season(3)  | ,073   | ,151 | ,235   | 1  | ,628 | 1,076  | ,801                | 1,445 |
| season(4)  | -,482  | ,181 | 7,122  | 1  | ,008 | ,617   | ,433                | ,880  |
| Constant   | -3,548 | ,373 | 90,257 | 1  | ,000 | ,029   |                     |       |

a. Variable(s) entered on step 1: bv1, VASTY2, weekday, holiday, season.

```
LOGISTIC REGRESSION VARIABLES seurauslt3
/METHOD=ENTER bv2 VASTY2 weekday holiday season
/CONTRAST (bv2)=Indicator(1)
/CONTRAST (VASTY2)=Indicator(1)
/CONTRAST (weekday)=Indicator(1)
/CONTRAST (holiday)=Indicator(1)
/CONTRAST (season)=Indicator(1)
/PRINT=CI(95)
/CRITERIA=PIN(0.05) POUT(0.10) ITERATE(20) CUT(0.5).
```

**Block 1: Method = Enter**

**Omnibus Tests of Model Coefficients**

|        |       | Chi-square | df | Sig. |
|--------|-------|------------|----|------|
| Step 1 | Step  | 326,097    | 48 | ,000 |
|        | Block | 326,097    | 48 | ,000 |
|        | Model | 326,097    | 48 | ,000 |

**Model Summary**

| Step | -2 Log likelihood    | Cox & Snell R Square | Nagelkerke R Square |
|------|----------------------|----------------------|---------------------|
| 1    | 3212,95 <sup>a</sup> | ,026                 | ,104                |

a. Estimation terminated at iteration number 9 because parameter estimates changed by less than ,001.

**Classification Table<sup>a</sup>**

|                    |                                                    | Predicted<br>seurauslt3<br>seuraus<br>highest = ...          |
|--------------------|----------------------------------------------------|--------------------------------------------------------------|
| Observed           |                                                    | 0 ingen<br>händelse<br>eller ei<br>haittaa                   |
| Step 1             | seurauslt3 seuraus highest = haitta (i någon form) | 0 ingen händelse eller ei haittaa<br>1 haitta (i någon form) |
| Overall Percentage |                                                    | 12075<br>400                                                 |

**Classification Table<sup>a</sup>**

|                    |                                                    | Predicted<br>seurauslt3<br>seuraus<br>highest = ...          |
|--------------------|----------------------------------------------------|--------------------------------------------------------------|
| Observed           |                                                    | 1 haitta (i någon form)                                      |
| Step 1             | seurauslt3 seuraus highest = haitta (i någon form) | 0 ingen händelse eller ei haittaa<br>1 haitta (i någon form) |
| Overall Percentage |                                                    | 0<br>0                                                       |

**Classification Table<sup>a</sup>**

|                    |                                                    | Predicted          |
|--------------------|----------------------------------------------------|--------------------|
| Observed           |                                                    | Percentage Correct |
| Step 1             | seurauslt3 seuraus highest = haitta (i någon form) | 100,0<br>,0        |
| Overall Percentage |                                                    | 96,8               |



a. The cut value is ,500

**Variables in the Equation**

|                         | B      | S.E.  | Wald    | df | Sig. | Exp(B) | 95% C.I. for EXP(B) |       |
|-------------------------|--------|-------|---------|----|------|--------|---------------------|-------|
|                         |        |       |         |    |      |        | Lower               | Upper |
| Step 1 <sup>a</sup> bv2 |        |       | 1,141   | 2  | ,565 |        |                     |       |
| bv2(1)                  | ,047   | ,150  | ,100    | 1  | ,752 | 1,049  | ,781                | 1,407 |
| bv2(2)                  | ,138   | ,136  | 1,025   | 1  | ,311 | 1,148  | ,879                | 1,499 |
| VASTY2                  |        |       | 230,166 | 35 | ,000 |        |                     |       |
| VASTY2(1)               | ,595   | ,424  | 1,971   | 1  | ,160 | 1,814  | ,790                | 4,164 |
| VASTY2(2)               | 1,221  | ,390  | 9,800   | 1  | ,002 | 3,390  | 1,579               | 7,280 |
| VASTY2(3)               | -1,577 | ,788  | 4,009   | 1  | ,045 | ,207   | ,044                | ,967  |
| VASTY2(4)               | ,487   | ,431  | 1,274   | 1  | ,259 | 1,627  | ,699                | 3,788 |
| VASTY2(5)               | ,463   | ,442  | 1,101   | 1  | ,294 | 1,590  | ,669                | 3,779 |
| VASTY2(6)               | -1,556 | ,786  | 3,916   | 1  | ,048 | ,211   | ,045                | ,985  |
| VASTY2(7)               | ,606   | ,424  | 2,043   | 1  | ,153 | 1,834  | ,798                | 4,211 |
| VASTY2(8)               | ,272   | ,449  | ,367    | 1  | ,545 | 1,312  | ,544                | 3,163 |
| VASTY2(9)               | 1,114  | ,398  | 7,820   | 1  | ,005 | 3,047  | 1,396               | 6,652 |
| VASTY2(10)              | 1,486  | ,381  | 15,215  | 1  | ,000 | 4,418  | 2,094               | 9,322 |
| VASTY2(11)              | 1,139  | ,393  | 8,399   | 1  | ,004 | 3,125  | 1,446               | 6,753 |
| VASTY2(12)              | ,641   | ,421  | 2,326   | 1  | ,127 | 1,899  | ,833                | 4,330 |
| VASTY2(13)              | 1,482  | ,383  | 14,951  | 1  | ,000 | 4,404  | 2,077               | 9,336 |
| VASTY2(14)              | ,176   | ,457  | ,148    | 1  | ,701 | 1,192  | ,486                | 2,921 |
| VASTY2(15)              | -1,551 | ,786  | 3,892   | 1  | ,049 | ,212   | ,045                | ,990  |
| VASTY2(16)              | -,515  | ,675  | ,582    | 1  | ,445 | ,598   | ,159                | 2,242 |
| VASTY2(17)              | -,266  | ,510  | ,271    | 1  | ,602 | ,767   | ,282                | 2,084 |
| VASTY2(18)              | -1,125 | ,671  | 2,807   | 1  | ,094 | ,325   | ,087                | 1,210 |
| VASTY2(19)              | -2,212 | 1,059 | 4,364   | 1  | ,037 | ,109   | ,014                | ,872  |
| VASTY2(20)              | ,442   | ,450  | ,966    | 1  | ,326 | 1,556  | ,644                | 3,760 |
| VASTY2(21)              | -1,543 | ,786  | 3,857   | 1  | ,050 | ,214   | ,046                | ,997  |
| VASTY2(22)              | -,807  | ,607  | 1,770   | 1  | ,183 | ,446   | ,136                | 1,465 |
| VASTY2(23)              | ,190   | ,456  | ,173    | 1  | ,678 | 1,209  | ,494                | 2,956 |
| VASTY2(24)              | -,886  | ,607  | 2,127   | 1  | ,145 | ,412   | ,125                | 1,356 |
| VASTY2(25)              | -1,337 | ,786  | 2,890   | 1  | ,089 | ,263   | ,056                | 1,227 |
| VASTY2(26)              | -2,061 | 1,058 | 3,795   | 1  | ,051 | ,127   | ,016                | 1,013 |
| VASTY2(27)              | -,883  | ,607  | 2,113   | 1  | ,146 | ,414   | ,126                | 1,360 |
| VASTY2(28)              | -,137  | ,567  | ,058    | 1  | ,809 | ,872   | ,287                | 2,652 |
| VASTY2(29)              | -,448  | ,533  | ,707    | 1  | ,400 | ,639   | ,225                | 1,816 |
| VASTY2(30)              | -,289  | ,510  | ,322    | 1  | ,571 | ,749   | ,275                | 2,035 |
| VASTY2(31)              | 1,224  | ,389  | 9,888   | 1  | ,002 | 3,399  | 1,586               | 7,289 |
| VASTY2(32)              | -,272  | ,511  | ,283    | 1  | ,595 | ,762   | ,280                | 2,073 |
| VASTY2(33)              | -,282  | ,510  | ,304    | 1  | ,581 | ,755   | ,278                | 2,052 |
| VASTY2(34)              | -1,142 | ,671  | 2,894   | 1  | ,089 | ,319   | ,086                | 1,190 |
| VASTY2(35)              | ,074   | ,481  | ,024    | 1  | ,878 | 1,077  | ,420                | 2,763 |

**Variables in the Equation**

|            | B      | S.E. | Wald   | df | Sig. | Exp(B) | 95% C.I. for EXP(B) |       |
|------------|--------|------|--------|----|------|--------|---------------------|-------|
|            |        |      |        |    |      |        | Lower               | Upper |
| weekday    |        |      | 12,613 | 6  | ,050 |        |                     |       |
| weekday(1) | ,227   | ,185 | 1,495  | 1  | ,221 | 1,254  | ,872                | 1,803 |
| weekday(2) | -,013  | ,195 | ,005   | 1  | ,946 | ,987   | ,674                | 1,446 |
| weekday(3) | ,080   | ,191 | ,173   | 1  | ,677 | 1,083  | ,745                | 1,574 |
| weekday(4) | ,235   | ,186 | 1,591  | 1  | ,207 | 1,264  | ,878                | 1,820 |
| weekday(5) | -,063  | ,200 | ,098   | 1  | ,754 | ,939   | ,635                | 1,390 |
| weekday(6) | -,409  | ,217 | 3,534  | 1  | ,060 | ,665   | ,434                | 1,018 |
| holiday(1) | -,478  | ,373 | 1,648  | 1  | ,199 | ,620   | ,299                | 1,287 |
| season     |        |      | 10,322 | 4  | ,035 |        |                     |       |
| season(1)  | -,210  | ,162 | 1,675  | 1  | ,196 | ,811   | ,590                | 1,114 |
| season(2)  | -,107  | ,146 | ,534   | 1  | ,465 | ,899   | ,675                | 1,197 |
| season(3)  | ,067   | ,150 | ,196   | 1  | ,658 | 1,069  | ,796                | 1,435 |
| season(4)  | -,488  | ,181 | 7,301  | 1  | ,007 | ,614   | ,431                | ,875  |
| Constant   | -3,625 | ,382 | 90,231 | 1  | ,000 | ,027   |                     |       |

a. Variable(s) entered on step 1: bv2, VASTY2, weekday, holiday, season.

```
LOGISTIC REGRESSION VARIABLES seurauslt3
/METHOD=ENTER bv3 VASTY2 weekday holiday season
/CONTRAST (bv3)=Indicator(1)
/CONTRAST (VASTY2)=Indicator(1)
/CONTRAST (weekday)=Indicator(1)
/CONTRAST (holiday)=Indicator(1)
/CONTRAST (season)=Indicator(1)
/PRINT=CI(95)
/CRITERIA=PIN(0.05) POUT(0.10) ITERATE(20) CUT(0.5).
```

**Block 1: Method = Enter**

**Omnibus Tests of Model Coefficients**

|        |       | Chi-square | df | Sig. |
|--------|-------|------------|----|------|
| Step 1 | Step  | 325,681    | 48 | ,000 |
|        | Block | 325,681    | 48 | ,000 |
|        | Model | 325,681    | 48 | ,000 |

**Model Summary**

| Step | -2 Log likelihood    | Cox & Snell R Square | Nagelkerke R Square |
|------|----------------------|----------------------|---------------------|
| 1    | 3213,37 <sup>a</sup> | ,026                 | ,104                |

a. Estimation terminated at iteration number 9 because parameter estimates changed by less than ,001.

**Classification Table<sup>a</sup>**

|                    |                                                    | Predicted<br>seurauslt3<br>seuraus<br>highest = ...          |
|--------------------|----------------------------------------------------|--------------------------------------------------------------|
| Observed           |                                                    | 0 ingen<br>händelse<br>eller ei<br>haittaa                   |
| Step 1             | seurauslt3 seuraus highest = haitta (i någon form) | 0 ingen händelse eller ei haittaa<br>1 haitta (i någon form) |
| Overall Percentage |                                                    | 12075<br>400                                                 |

**Classification Table<sup>a</sup>**

|                    |                                                    | Predicted<br>seurauslt3<br>seuraus<br>highest = ...          |
|--------------------|----------------------------------------------------|--------------------------------------------------------------|
| Observed           |                                                    | 1 haitta (i någon form)                                      |
| Step 1             | seurauslt3 seuraus highest = haitta (i någon form) | 0 ingen händelse eller ei haittaa<br>1 haitta (i någon form) |
| Overall Percentage |                                                    | 0<br>0                                                       |

**Classification Table<sup>a</sup>**

|                    |                                                    | Predicted          |
|--------------------|----------------------------------------------------|--------------------|
| Observed           |                                                    | Percentage Correct |
| Step 1             | seurauslt3 seuraus highest = haitta (i någon form) | 100,0<br>,0        |
| Overall Percentage |                                                    | 96,8               |

a. The cut value is ,500

**Variables in the Equation**

|                         | B      | S.E.  | Wald    | df | Sig. | Exp(B) | 95% C.I. for EXP(B) |       |
|-------------------------|--------|-------|---------|----|------|--------|---------------------|-------|
|                         |        |       |         |    |      |        | Lower               | Upper |
| Step 1 <sup>a</sup> bv3 |        |       | ,731    | 2  | ,694 |        |                     |       |
| bv3(1)                  | -,092  | ,199  | ,217    | 1  | ,642 | ,912   | ,618                | 1,346 |
| bv3(2)                  | ,098   | ,150  | ,425    | 1  | ,515 | 1,103  | ,821                | 1,481 |
| VASTY2                  |        |       | 232,872 | 35 | ,000 |        |                     |       |
| VASTY2(1)               | ,612   | ,424  | 2,082   | 1  | ,149 | 1,845  | ,803                | 4,237 |
| VASTY2(2)               | 1,227  | ,390  | 9,912   | 1  | ,002 | 3,410  | 1,589               | 7,319 |
| VASTY2(3)               | -1,569 | ,788  | 3,967   | 1  | ,046 | ,208   | ,044                | ,975  |
| VASTY2(4)               | ,493   | ,431  | 1,308   | 1  | ,253 | 1,638  | ,703                | 3,815 |
| VASTY2(5)               | ,474   | ,441  | 1,155   | 1  | ,282 | 1,607  | ,677                | 3,818 |
| VASTY2(6)               | -1,552 | ,787  | 3,889   | 1  | ,049 | ,212   | ,045                | ,990  |
| VASTY2(7)               | ,608   | ,428  | 2,019   | 1  | ,155 | 1,838  | ,794                | 4,254 |
| VASTY2(8)               | ,284   | ,448  | ,403    | 1  | ,526 | 1,329  | ,552                | 3,197 |
| VASTY2(9)               | 1,128  | ,398  | 8,050   | 1  | ,005 | 3,089  | 1,417               | 6,734 |
| VASTY2(10)              | 1,491  | ,380  | 15,384  | 1  | ,000 | 4,443  | 2,109               | 9,362 |
| VASTY2(11)              | 1,147  | ,393  | 8,514   | 1  | ,004 | 3,149  | 1,457               | 6,805 |
| VASTY2(12)              | ,651   | ,420  | 2,406   | 1  | ,121 | 1,918  | ,842                | 4,365 |
| VASTY2(13)              | 1,504  | ,381  | 15,606  | 1  | ,000 | 4,498  | 2,133               | 9,483 |
| VASTY2(14)              | ,191   | ,457  | ,175    | 1  | ,676 | 1,210  | ,495                | 2,962 |
| VASTY2(15)              | -1,536 | ,786  | 3,821   | 1  | ,051 | ,215   | ,046                | 1,004 |
| VASTY2(16)              | -,508  | ,676  | ,566    | 1  | ,452 | ,601   | ,160                | 2,262 |
| VASTY2(17)              | -,260  | ,510  | ,259    | 1  | ,610 | ,771   | ,284                | 2,096 |
| VASTY2(18)              | -1,115 | ,672  | 2,758   | 1  | ,097 | ,328   | ,088                | 1,223 |
| VASTY2(19)              | -2,166 | 1,063 | 4,150   | 1  | ,042 | ,115   | ,014                | ,921  |
| VASTY2(20)              | ,452   | ,451  | 1,005   | 1  | ,316 | 1,572  | ,649                | 3,803 |
| VASTY2(21)              | -1,533 | ,786  | 3,809   | 1  | ,051 | ,216   | ,046                | 1,007 |
| VASTY2(22)              | -,815  | ,606  | 1,808   | 1  | ,179 | ,443   | ,135                | 1,452 |
| VASTY2(23)              | ,194   | ,456  | ,181    | 1  | ,671 | 1,214  | ,496                | 2,970 |
| VASTY2(24)              | -,876  | ,607  | 2,081   | 1  | ,149 | ,416   | ,127                | 1,369 |
| VASTY2(25)              | -1,332 | ,786  | 2,870   | 1  | ,090 | ,264   | ,057                | 1,232 |
| VASTY2(26)              | -2,045 | 1,058 | 3,740   | 1  | ,053 | ,129   | ,016                | 1,028 |
| VASTY2(27)              | -,862  | ,607  | 2,020   | 1  | ,155 | ,422   | ,129                | 1,387 |
| VASTY2(28)              | -,121  | ,566  | ,045    | 1  | ,831 | ,886   | ,292                | 2,689 |
| VASTY2(29)              | -,445  | ,533  | ,698    | 1  | ,403 | ,641   | ,225                | 1,821 |
| VASTY2(30)              | -,289  | ,510  | ,322    | 1  | ,571 | ,749   | ,275                | 2,035 |
| VASTY2(31)              | 1,242  | ,392  | 10,069  | 1  | ,002 | 3,464  | 1,608               | 7,462 |
| VASTY2(32)              | -,249  | ,513  | ,235    | 1  | ,628 | ,780   | ,285                | 2,132 |
| VASTY2(33)              | -,262  | ,512  | ,262    | 1  | ,609 | ,770   | ,282                | 2,099 |
| VASTY2(34)              | -1,136 | ,671  | 2,866   | 1  | ,090 | ,321   | ,086                | 1,196 |
| VASTY2(35)              | ,084   | ,482  | ,031    | 1  | ,861 | 1,088  | ,423                | 2,800 |

**Variables in the Equation**

|            | B      | S.E. | Wald   | df | Sig. | Exp(B) | 95% C.I. for EXP(B) |       |
|------------|--------|------|--------|----|------|--------|---------------------|-------|
|            |        |      |        |    |      |        | Lower               | Upper |
| weekday    |        |      | 12,421 | 6  | ,053 |        |                     |       |
| weekday(1) | ,223   | ,185 | 1,455  | 1  | ,228 | 1,250  | ,870                | 1,798 |
| weekday(2) | -,019  | ,195 | ,009   | 1  | ,923 | ,981   | ,670                | 1,437 |
| weekday(3) | ,077   | ,191 | ,163   | 1  | ,686 | 1,080  | ,743                | 1,571 |
| weekday(4) | ,232   | ,186 | 1,562  | 1  | ,211 | 1,262  | ,876                | 1,816 |
| weekday(5) | -,065  | ,200 | ,107   | 1  | ,743 | ,937   | ,634                | 1,385 |
| weekday(6) | -,406  | ,218 | 3,482  | 1  | ,062 | ,666   | ,435                | 1,021 |
| holiday(1) | -,479  | ,373 | 1,657  | 1  | ,198 | ,619   | ,298                | 1,285 |
| season     |        |      | 10,360 | 4  | ,035 |        |                     |       |
| season(1)  | -,209  | ,162 | 1,666  | 1  | ,197 | ,811   | ,590                | 1,115 |
| season(2)  | -,106  | ,146 | ,527   | 1  | ,468 | ,900   | ,676                | 1,197 |
| season(3)  | ,067   | ,150 | ,200   | 1  | ,655 | 1,070  | ,796                | 1,436 |
| season(4)  | -,489  | ,181 | 7,323  | 1  | ,007 | ,613   | ,430                | ,874  |
| Constant   | -3,562 | ,371 | 92,066 | 1  | ,000 | ,028   |                     |       |

a. Variable(s) entered on step 1: bv3, VASTY2, weekday, holiday, season.

```
LOGISTIC REGRESSION VARIABLES seurauslt3
/METHOD=ENTER sv3 VASTY2 weekday holiday season
/CONTRAST (sv3)=Indicator(1)
/CONTRAST (VASTY2)=Indicator(1)
/CONTRAST (weekday)=Indicator(1)
/CONTRAST (holiday)=Indicator(1)
/CONTRAST (season)=Indicator(1)
/PRINT=CI(95)
/CRITERIA=PIN(0.05) POUT(0.10) ITERATE(20) CUT(0.5).
```

**Block 1: Method = Enter**

**Omnibus Tests of Model Coefficients**

|        |       | Chi-square | df | Sig. |
|--------|-------|------------|----|------|
| Step 1 | Step  | 325,661    | 48 | ,000 |
|        | Block | 325,661    | 48 | ,000 |
|        | Model | 325,661    | 48 | ,000 |

**Model Summary**

| Step | -2 Log likelihood    | Cox & Snell R Square | Nagelkerke R Square |
|------|----------------------|----------------------|---------------------|
| 1    | 3213,39 <sup>a</sup> | ,026                 | ,104                |

a. Estimation terminated at iteration number 9 because parameter estimates changed by less than ,001.

**Classification Table<sup>a</sup>**

|                    |                                                    | Predicted<br>seurauslt3<br>seuraus<br>highest = ...          |
|--------------------|----------------------------------------------------|--------------------------------------------------------------|
| Observed           |                                                    | 0 ingen<br>händelse<br>eller ei<br>haittaa                   |
| Step 1             | seurauslt3 seuraus highest = haitta (i någon form) | 0 ingen händelse eller ei haittaa<br>1 haitta (i någon form) |
| Overall Percentage |                                                    | 12075<br>400                                                 |

**Classification Table<sup>a</sup>**

|                    |                                                    | Predicted<br>seurauslt3<br>seuraus<br>highest = ...          |
|--------------------|----------------------------------------------------|--------------------------------------------------------------|
| Observed           |                                                    | 1 haitta (i någon form)                                      |
| Step 1             | seurauslt3 seuraus highest = haitta (i någon form) | 0 ingen händelse eller ei haittaa<br>1 haitta (i någon form) |
| Overall Percentage |                                                    | 0<br>0                                                       |

**Classification Table<sup>a</sup>**

|                    |                                                    | Predicted          |
|--------------------|----------------------------------------------------|--------------------|
| Observed           |                                                    | Percentage Correct |
| Step 1             | seurauslt3 seuraus highest = haitta (i någon form) | 100,0<br>,0        |
| Overall Percentage |                                                    | 96,8               |

a. The cut value is ,500

**Variables in the Equation**

|                         | B      | S.E.  | Wald    | df | Sig. | Exp(B) | 95% C.I. for EXP(B) |       |
|-------------------------|--------|-------|---------|----|------|--------|---------------------|-------|
|                         |        |       |         |    |      |        | Lower               | Upper |
| Step 1 <sup>a</sup> sv3 |        |       | ,702    | 2  | ,704 |        |                     |       |
| sv3(1)                  | -,104  | ,157  | ,440    | 1  | ,507 | ,901   | ,663                | 1,225 |
| sv3(2)                  | ,034   | ,149  | ,051    | 1  | ,822 | 1,034  | ,772                | 1,385 |
| VASTY2                  |        |       | 221,463 | 35 | ,000 |        |                     |       |
| VASTY2(1)               | ,595   | ,425  | 1,955   | 1  | ,162 | 1,813  | ,787                | 4,172 |
| VASTY2(2)               | 1,192  | ,395  | 9,093   | 1  | ,003 | 3,295  | 1,518               | 7,153 |
| VASTY2(3)               | -1,512 | ,786  | 3,703   | 1  | ,054 | ,220   | ,047                | 1,028 |
| VASTY2(4)               | ,544   | ,429  | 1,603   | 1  | ,205 | 1,722  | ,742                | 3,995 |
| VASTY2(5)               | ,527   | ,444  | 1,412   | 1  | ,235 | 1,694  | ,710                | 4,042 |
| VASTY2(6)               | -1,570 | ,791  | 3,941   | 1  | ,047 | ,208   | ,044                | ,980  |
| VASTY2(7)               | ,681   | ,420  | 2,627   | 1  | ,105 | 1,975  | ,867                | 4,497 |
| VASTY2(8)               | ,323   | ,449  | ,518    | 1  | ,472 | 1,381  | ,573                | 3,330 |
| VASTY2(9)               | 1,145  | ,397  | 8,312   | 1  | ,004 | 3,141  | 1,443               | 6,838 |
| VASTY2(10)              | 1,455  | ,389  | 14,017  | 1  | ,000 | 4,286  | 2,001               | 9,181 |
| VASTY2(11)              | 1,158  | ,393  | 8,680   | 1  | ,003 | 3,183  | 1,473               | 6,875 |
| VASTY2(12)              | ,619   | ,425  | 2,123   | 1  | ,145 | 1,858  | ,808                | 4,273 |
| VASTY2(13)              | 1,481  | ,390  | 14,438  | 1  | ,000 | 4,397  | 2,048               | 9,440 |
| VASTY2(14)              | ,179   | ,459  | ,152    | 1  | ,697 | 1,196  | ,486                | 2,940 |
| VASTY2(15)              | -1,567 | ,789  | 3,942   | 1  | ,047 | ,209   | ,044                | ,980  |
| VASTY2(16)              | -,491  | ,675  | ,528    | 1  | ,467 | ,612   | ,163                | 2,300 |
| VASTY2(17)              | -,235  | ,511  | ,212    | 1  | ,645 | ,790   | ,290                | 2,150 |
| VASTY2(18)              | -1,027 | ,679  | 2,286   | 1  | ,131 | ,358   | ,095                | 1,356 |
| VASTY2(19)              | -2,138 | 1,062 | 4,053   | 1  | ,044 | ,118   | ,015                | ,945  |
| VASTY2(20)              | ,453   | ,452  | 1,006   | 1  | ,316 | 1,573  | ,649                | 3,812 |
| VASTY2(21)              | -1,506 | ,786  | 3,671   | 1  | ,055 | ,222   | ,048                | 1,035 |
| VASTY2(22)              | -,828  | ,606  | 1,867   | 1  | ,172 | ,437   | ,133                | 1,433 |
| VASTY2(23)              | ,202   | ,456  | ,197    | 1  | ,658 | 1,224  | ,500                | 2,995 |
| VASTY2(24)              | -,861  | ,607  | 2,013   | 1  | ,156 | ,423   | ,129                | 1,389 |
| VASTY2(25)              | -1,310 | ,787  | 2,773   | 1  | ,096 | ,270   | ,058                | 1,261 |
| VASTY2(26)              | -2,037 | 1,058 | 3,709   | 1  | ,054 | ,130   | ,016                | 1,037 |
| VASTY2(27)              | -,874  | ,609  | 2,060   | 1  | ,151 | ,417   | ,126                | 1,377 |
| VASTY2(28)              | -,157  | ,574  | ,075    | 1  | ,785 | ,855   | ,278                | 2,633 |
| VASTY2(29)              | -,487  | ,543  | ,807    | 1  | ,369 | ,614   | ,212                | 1,779 |
| VASTY2(30)              | -,242  | ,512  | ,223    | 1  | ,636 | ,785   | ,288                | 2,140 |
| VASTY2(31)              | 1,323  | ,399  | 10,991  | 1  | ,001 | 3,753  | 1,717               | 8,203 |
| VASTY2(32)              | -,177  | ,521  | ,115    | 1  | ,734 | ,838   | ,302                | 2,326 |
| VASTY2(33)              | -,187  | ,521  | ,129    | 1  | ,720 | ,830   | ,299                | 2,303 |
| VASTY2(34)              | -1,127 | ,671  | 2,818   | 1  | ,093 | ,324   | ,087                | 1,208 |
| VASTY2(35)              | ,119   | ,479  | ,061    | 1  | ,804 | 1,126  | ,440                | 2,882 |

**Variables in the Equation**

|            | B      | S.E. | Wald   | df | Sig. | Exp(B) | 95% C.I. for EXP(B) |       |
|------------|--------|------|--------|----|------|--------|---------------------|-------|
|            |        |      |        |    |      |        | Lower               | Upper |
| weekday    |        |      | 12,798 | 6  | ,046 |        |                     |       |
| weekday(1) | ,226   | ,185 | 1,493  | 1  | ,222 | 1,254  | ,872                | 1,803 |
| weekday(2) | -,012  | ,195 | ,004   | 1  | ,952 | ,988   | ,675                | 1,448 |
| weekday(3) | ,085   | ,191 | ,196   | 1  | ,658 | 1,088  | ,748                | 1,583 |
| weekday(4) | ,242   | ,186 | 1,693  | 1  | ,193 | 1,274  | ,885                | 1,836 |
| weekday(5) | -,060  | ,200 | ,089   | 1  | ,766 | ,942   | ,637                | 1,394 |
| weekday(6) | -,408  | ,217 | 3,525  | 1  | ,060 | ,665   | ,434                | 1,018 |
| holiday(1) | -,473  | ,373 | 1,608  | 1  | ,205 | ,623   | ,300                | 1,294 |
| season     |        |      | 10,546 | 4  | ,032 |        |                     |       |
| season(1)  | -,213  | ,162 | 1,735  | 1  | ,188 | ,808   | ,588                | 1,110 |
| season(2)  | -,108  | ,146 | ,546   | 1  | ,460 | ,898   | ,675                | 1,195 |
| season(3)  | ,068   | ,150 | ,202   | 1  | ,653 | 1,070  | ,797                | 1,437 |
| season(4)  | -,493  | ,181 | 7,436  | 1  | ,006 | ,611   | ,429                | ,871  |
| Constant   | -3,551 | ,377 | 88,742 | 1  | ,000 | ,029   |                     |       |

a. Variable(s) entered on step 1: sv3, VASTY2, weekday, holiday, season.

```
LOGISTIC REGRESSION VARIABLES seurauslt3
/METHOD=ENTER sv5 VASTY2 weekday holiday season
/CONTRAST (sv5)=Indicator(1)
/CONTRAST (VASTY2)=Indicator(1)
/CONTRAST (weekday)=Indicator(1)
/CONTRAST (holiday)=Indicator(1)
/CONTRAST (season)=Indicator(1)
/PRINT=CI(95)
/CRITERIA=PIN(0.05) POUT(0.10) ITERATE(20) CUT(0.5).
```

**Block 1: Method = Enter**

**Omnibus Tests of Model Coefficients**

|        |       | Chi-square | df | Sig. |
|--------|-------|------------|----|------|
| Step 1 | Step  | 327,567    | 50 | ,000 |
|        | Block | 327,567    | 50 | ,000 |
|        | Model | 327,567    | 50 | ,000 |



**Model Summary**

| Step | -2 Log likelihood    | Cox & Snell R Square | Nagelkerke R Square |
|------|----------------------|----------------------|---------------------|
| 1    | 3211,48 <sup>a</sup> | ,026                 | ,105                |

a. Estimation terminated at iteration number 9 because parameter estimates changed by less than ,001.

**Classification Table<sup>a</sup>**

|                    |                                                    | Predicted<br>seurauslt3<br>seuraus<br>highest = ...          |
|--------------------|----------------------------------------------------|--------------------------------------------------------------|
| Observed           |                                                    | 0 ingen<br>händelse<br>eller ei<br>haittaa                   |
| Step 1             | seurauslt3 seuraus highest = haitta (i någon form) | 0 ingen händelse eller ei haittaa<br>1 haitta (i någon form) |
| Overall Percentage |                                                    | 12075<br>400                                                 |

**Classification Table<sup>a</sup>**

|                    |                                                    | Predicted<br>seurauslt3<br>seuraus<br>highest = ...          |
|--------------------|----------------------------------------------------|--------------------------------------------------------------|
| Observed           |                                                    | 1 haitta (i någon form)                                      |
| Step 1             | seurauslt3 seuraus highest = haitta (i någon form) | 0 ingen händelse eller ei haittaa<br>1 haitta (i någon form) |
| Overall Percentage |                                                    | 0<br>0                                                       |

**Classification Table<sup>a</sup>**

|                    |                                                    | Predicted          |
|--------------------|----------------------------------------------------|--------------------|
| Observed           |                                                    | Percentage Correct |
| Step 1             | seurauslt3 seuraus highest = haitta (i någon form) | 100,0<br>,0        |
| Overall Percentage |                                                    | 96,8               |

a. The cut value is ,500

**Variables in the Equation**

|                         | B      | S.E.  | Wald    | df | Sig. | Exp(B) | 95% C.I. for EXP(B) |       |
|-------------------------|--------|-------|---------|----|------|--------|---------------------|-------|
|                         |        |       |         |    |      |        | Lower               | Upper |
| Step 1 <sup>a</sup> sv5 |        |       | 2,569   | 4  | ,632 |        |                     |       |
| sv5(1)                  | ,047   | ,199  | ,056    | 1  | ,813 | 1,048  | ,710                | 1,547 |
| sv5(2)                  | -,118  | ,208  | ,319    | 1  | ,572 | ,889   | ,591                | 1,337 |
| sv5(3)                  | ,103   | ,182  | ,321    | 1  | ,571 | 1,109  | ,776                | 1,583 |
| sv5(4)                  | ,214   | ,196  | 1,196   | 1  | ,274 | 1,239  | ,844                | 1,818 |
| VASTY2                  |        |       | 218,078 | 35 | ,000 |        |                     |       |
| VASTY2(1)               | ,554   | ,426  | 1,693   | 1  | ,193 | 1,739  | ,755                | 4,005 |
| VASTY2(2)               | 1,116  | ,398  | 7,852   | 1  | ,005 | 3,053  | 1,399               | 6,663 |
| VASTY2(3)               | -1,511 | ,786  | 3,699   | 1  | ,054 | ,221   | ,047                | 1,029 |
| VASTY2(4)               | ,529   | ,429  | 1,521   | 1  | ,217 | 1,698  | ,732                | 3,938 |
| VASTY2(5)               | ,514   | ,444  | 1,341   | 1  | ,247 | 1,673  | ,700                | 3,995 |
| VASTY2(6)               | -1,682 | ,795  | 4,481   | 1  | ,034 | ,186   | ,039                | ,883  |
| VASTY2(7)               | ,668   | ,420  | 2,530   | 1  | ,112 | 1,950  | ,856                | 4,441 |
| VASTY2(8)               | ,341   | ,450  | ,575    | 1  | ,448 | 1,407  | ,583                | 3,396 |
| VASTY2(9)               | 1,137  | ,397  | 8,198   | 1  | ,004 | 3,117  | 1,431               | 6,789 |
| VASTY2(10)              | 1,364  | ,393  | 12,063  | 1  | ,001 | 3,913  | 1,812               | 8,450 |
| VASTY2(11)              | 1,140  | ,393  | 8,406   | 1  | ,004 | 3,125  | 1,447               | 6,753 |
| VASTY2(12)              | ,556   | ,426  | 1,704   | 1  | ,192 | 1,744  | ,757                | 4,021 |
| VASTY2(13)              | 1,379  | ,395  | 12,219  | 1  | ,000 | 3,972  | 1,833               | 8,609 |
| VASTY2(14)              | ,121   | ,460  | ,069    | 1  | ,793 | 1,128  | ,458                | 2,781 |
| VASTY2(15)              | -1,646 | ,791  | 4,336   | 1  | ,037 | ,193   | ,041                | ,908  |
| VASTY2(16)              | -,559  | ,676  | ,683    | 1  | ,408 | ,572   | ,152                | 2,152 |
| VASTY2(17)              | -,258  | ,511  | ,256    | 1  | ,613 | ,772   | ,284                | 2,102 |
| VASTY2(18)              | -1,128 | ,684  | 2,718   | 1  | ,099 | ,324   | ,085                | 1,237 |
| VASTY2(19)              | -2,243 | 1,066 | 4,433   | 1  | ,035 | ,106   | ,013                | ,856  |
| VASTY2(20)              | ,382   | ,454  | ,709    | 1  | ,400 | 1,466  | ,602                | 3,570 |
| VASTY2(21)              | -1,529 | ,786  | 3,782   | 1  | ,052 | ,217   | ,046                | 1,012 |
| VASTY2(22)              | -,836  | ,606  | 1,903   | 1  | ,168 | ,433   | ,132                | 1,422 |
| VASTY2(23)              | ,189   | ,457  | ,171    | 1  | ,679 | 1,208  | ,494                | 2,957 |
| VASTY2(24)              | -,892  | ,607  | 2,161   | 1  | ,142 | ,410   | ,125                | 1,346 |
| VASTY2(25)              | -1,313 | ,787  | 2,780   | 1  | ,095 | ,269   | ,058                | 1,259 |
| VASTY2(26)              | -2,063 | 1,058 | 3,803   | 1  | ,051 | ,127   | ,016                | 1,010 |
| VASTY2(27)              | -,945  | ,610  | 2,395   | 1  | ,122 | ,389   | ,118                | 1,286 |
| VASTY2(28)              | -,283  | ,581  | ,237    | 1  | ,626 | ,753   | ,241                | 2,353 |
| VASTY2(29)              | -,620  | ,551  | 1,265   | 1  | ,261 | ,538   | ,183                | 1,585 |
| VASTY2(30)              | -,247  | ,512  | ,233    | 1  | ,629 | ,781   | ,286                | 2,130 |
| VASTY2(31)              | 1,248  | ,403  | 9,567   | 1  | ,002 | 3,483  | 1,579               | 7,679 |
| VASTY2(32)              | -,276  | ,527  | ,275    | 1  | ,600 | ,759   | ,270                | 2,130 |
| VASTY2(33)              | -,292  | ,528  | ,306    | 1  | ,580 | ,747   | ,265                | 2,101 |

**Variables in the Equation**

|            | B      | S.E. | Wald   | df | Sig. | Exp(B) | 95% C.I. for EXP(B) |       |
|------------|--------|------|--------|----|------|--------|---------------------|-------|
|            |        |      |        |    |      |        | Lower               | Upper |
| VASTY2(34) | -1,134 | ,671 | 2,855  | 1  | ,091 | ,322   | ,086                | 1,199 |
| VASTY2(35) | ,071   | ,480 | ,022   | 1  | ,882 | 1,074  | ,419                | 2,750 |
| weekday    |        |      | 13,001 | 6  | ,043 |        |                     |       |
| weekday(1) | ,227   | ,185 | 1,499  | 1  | ,221 | 1,255  | ,873                | 1,804 |
| weekday(2) | -,008  | ,195 | ,002   | 1  | ,967 | ,992   | ,677                | 1,453 |
| weekday(3) | ,086   | ,191 | ,205   | 1  | ,651 | 1,090  | ,750                | 1,586 |
| weekday(4) | ,250   | ,186 | 1,794  | 1  | ,180 | 1,284  | ,891                | 1,849 |
| weekday(5) | -,053  | ,200 | ,070   | 1  | ,791 | ,948   | ,640                | 1,404 |
| weekday(6) | -,411  | ,217 | 3,578  | 1  | ,059 | ,663   | ,433                | 1,015 |
| holiday(1) | -,476  | ,373 | 1,629  | 1  | ,202 | ,621   | ,299                | 1,290 |
| season     |        |      | 10,497 | 4  | ,033 |        |                     |       |
| season(1)  | -,209  | ,162 | 1,666  | 1  | ,197 | ,811   | ,590                | 1,115 |
| season(2)  | -,102  | ,146 | ,483   | 1  | ,487 | ,903   | ,678                | 1,204 |
| season(3)  | ,068   | ,151 | ,204   | 1  | ,651 | 1,070  | ,797                | 1,438 |
| season(4)  | -,493  | ,181 | 7,443  | 1  | ,006 | ,611   | ,429                | ,870  |
| Constant   | -3,602 | ,388 | 85,949 | 1  | ,000 | ,027   |                     |       |

a. Variable(s) entered on step 1: sv5, VASTY2, weekday, holiday, season.

```
LOGISTIC REGRESSION VARIABLES seurauslt3
/METHOD=ENTER sv7 VASTY2 weekday holiday season
/CONTRAST (sv7)=Indicator(1)
/CONTRAST (VASTY2)=Indicator(1)
/CONTRAST (weekday)=Indicator(1)
/CONTRAST (holiday)=Indicator(1)
/CONTRAST (season)=Indicator(1)
/PRINT=CI(95)
/CRITERIA=PIN(0.05) POUT(0.10) ITERATE(20) CUT(0.5).
```

**Block 1: Method = Enter**

**Omnibus Tests of Model Coefficients**

|        |       | Chi-square | df | Sig. |
|--------|-------|------------|----|------|
| Step 1 | Step  | 328,261    | 52 | ,000 |
|        | Block | 328,261    | 52 | ,000 |
|        | Model | 328,261    | 52 | ,000 |

**Model Summary**

| Step | -2 Log likelihood    | Cox & Snell R Square | Nagelkerke R Square |
|------|----------------------|----------------------|---------------------|
| 1    | 3210,79 <sup>a</sup> | ,026                 | ,105                |

a. Estimation terminated at iteration number 9 because parameter estimates changed by less than ,001.

**Classification Table<sup>a</sup>**

|                    |                                                    | Predicted<br>seurauslt3<br>seuraus<br>highest = ...          |
|--------------------|----------------------------------------------------|--------------------------------------------------------------|
| Observed           |                                                    | 0 ingen<br>händelse<br>eller ei<br>haittaa                   |
| Step 1             | seurauslt3 seuraus highest = haitta (i någon form) | 0 ingen händelse eller ei haittaa<br>1 haitta (i någon form) |
| Overall Percentage |                                                    | 12075<br>400                                                 |

**Classification Table<sup>a</sup>**

|                    |                                                    | Predicted<br>seurauslt3<br>seuraus<br>highest = ...          |
|--------------------|----------------------------------------------------|--------------------------------------------------------------|
| Observed           |                                                    | 1 haitta (i någon form)                                      |
| Step 1             | seurauslt3 seuraus highest = haitta (i någon form) | 0 ingen händelse eller ei haittaa<br>1 haitta (i någon form) |
| Overall Percentage |                                                    | 0<br>0                                                       |

**Classification Table<sup>a</sup>**

|                    |                                                    | Predicted          |
|--------------------|----------------------------------------------------|--------------------|
| Observed           |                                                    | Percentage Correct |
| Step 1             | seurauslt3 seuraus highest = haitta (i någon form) | 100,0<br>,0        |
| Overall Percentage |                                                    | 96,8               |

a. The cut value is ,500

**Variables in the Equation**

|                         | B      | S.E.  | Wald    | df | Sig. | Exp(B) | 95% C.I. for EXP(B) |       |
|-------------------------|--------|-------|---------|----|------|--------|---------------------|-------|
|                         |        |       |         |    |      |        | Lower               | Upper |
| Step 1 <sup>a</sup> sv7 |        |       | 3,282   | 6  | ,773 |        |                     |       |
| sv7(1)                  | -,065  | ,222  | ,087    | 1  | ,768 | ,937   | ,606                | 1,447 |
| sv7(2)                  | -,206  | ,245  | ,712    | 1  | ,399 | ,813   | ,504                | 1,314 |
| sv7(3)                  | -,013  | ,229  | ,003    | 1  | ,955 | ,987   | ,630                | 1,546 |
| sv7(4)                  | ,147   | ,209  | ,489    | 1  | ,484 | 1,158  | ,768                | 1,746 |
| sv7(5)                  | -,029  | ,203  | ,020    | 1  | ,887 | ,972   | ,653                | 1,445 |
| sv7(6)                  | ,165   | ,223  | ,549    | 1  | ,459 | 1,179  | ,762                | 1,825 |
| VASTY2                  |        |       | 221,129 | 35 | ,000 |        |                     |       |
| VASTY2(1)               | ,601   | ,426  | 1,990   | 1  | ,158 | 1,823  | ,791                | 4,201 |
| VASTY2(2)               | 1,171  | ,399  | 8,608   | 1  | ,003 | 3,224  | 1,475               | 7,049 |
| VASTY2(3)               | -1,500 | ,786  | 3,644   | 1  | ,056 | ,223   | ,048                | 1,041 |
| VASTY2(4)               | ,563   | ,430  | 1,717   | 1  | ,190 | 1,756  | ,756                | 4,076 |
| VASTY2(5)               | ,538   | ,444  | 1,467   | 1  | ,226 | 1,712  | ,717                | 4,088 |
| VASTY2(6)               | -1,644 | ,797  | 4,250   | 1  | ,039 | ,193   | ,040                | ,922  |
| VASTY2(7)               | ,672   | ,420  | 2,560   | 1  | ,110 | 1,958  | ,860                | 4,458 |
| VASTY2(8)               | ,342   | ,450  | ,576    | 1  | ,448 | 1,407  | ,583                | 3,400 |
| VASTY2(9)               | 1,153  | ,397  | 8,417   | 1  | ,004 | 3,166  | 1,453               | 6,897 |
| VASTY2(10)              | 1,423  | ,394  | 13,066  | 1  | ,000 | 4,151  | 1,919               | 8,981 |
| VASTY2(11)              | 1,164  | ,394  | 8,747   | 1  | ,003 | 3,203  | 1,481               | 6,928 |
| VASTY2(12)              | ,606   | ,426  | 2,028   | 1  | ,154 | 1,834  | ,796                | 4,224 |
| VASTY2(13)              | 1,437  | ,396  | 13,154  | 1  | ,000 | 4,206  | 1,935               | 9,142 |
| VASTY2(14)              | ,167   | ,461  | ,131    | 1  | ,718 | 1,181  | ,479                | 2,913 |
| VASTY2(15)              | -1,594 | ,791  | 4,061   | 1  | ,044 | ,203   | ,043                | ,957  |
| VASTY2(16)              | -,515  | ,677  | ,578    | 1  | ,447 | ,598   | ,159                | 2,252 |
| VASTY2(17)              | -,223  | ,511  | ,190    | 1  | ,663 | ,800   | ,294                | 2,180 |
| VASTY2(18)              | -1,040 | ,687  | 2,290   | 1  | ,130 | ,353   | ,092                | 1,359 |
| VASTY2(19)              | -2,156 | 1,069 | 4,070   | 1  | ,044 | ,116   | ,014                | ,941  |
| VASTY2(20)              | ,422   | ,455  | ,861    | 1  | ,353 | 1,525  | ,625                | 3,721 |
| VASTY2(21)              | -1,505 | ,786  | 3,667   | 1  | ,055 | ,222   | ,048                | 1,036 |
| VASTY2(22)              | -,824  | ,606  | 1,850   | 1  | ,174 | ,439   | ,134                | 1,438 |
| VASTY2(23)              | ,211   | ,457  | ,214    | 1  | ,644 | 1,235  | ,505                | 3,024 |
| VASTY2(24)              | -,871  | ,607  | 2,058   | 1  | ,151 | ,419   | ,127                | 1,376 |
| VASTY2(25)              | -1,292 | ,787  | 2,694   | 1  | ,101 | ,275   | ,059                | 1,285 |
| VASTY2(26)              | -2,045 | 1,058 | 3,739   | 1  | ,053 | ,129   | ,016                | 1,028 |
| VASTY2(27)              | -,897  | ,611  | 2,152   | 1  | ,142 | ,408   | ,123                | 1,352 |
| VASTY2(28)              | -,253  | ,587  | ,185    | 1  | ,667 | ,777   | ,246                | 2,455 |
| VASTY2(29)              | -,592  | ,558  | 1,122   | 1  | ,289 | ,553   | ,185                | 1,653 |
| VASTY2(30)              | -,223  | ,512  | ,190    | 1  | ,663 | ,800   | ,293                | 2,182 |
| VASTY2(31)              | 1,328  | ,405  | 10,762  | 1  | ,001 | 3,772  | 1,706               | 8,337 |

**Variables in the Equation**

|            | B      | S.E. | Wald   | df | Sig. | Exp(B) | 95% C.I. for EXP(B) |       |
|------------|--------|------|--------|----|------|--------|---------------------|-------|
|            |        |      |        |    |      |        | Lower               | Upper |
| VASTY2(32) | -,189  | ,531 | ,127   | 1  | ,722 | ,828   | ,292                | 2,344 |
| VASTY2(33) | -,204  | ,534 | ,146   | 1  | ,703 | ,816   | ,287                | 2,322 |
| VASTY2(34) | -1,123 | ,671 | 2,796  | 1  | ,094 | ,325   | ,087                | 1,213 |
| VASTY2(35) | ,114   | ,480 | ,056   | 1  | ,812 | 1,121  | ,437                | 2,872 |
| weekday    |        |      | 12,916 | 6  | ,044 |        |                     |       |
| weekday(1) | ,226   | ,185 | 1,486  | 1  | ,223 | 1,254  | ,872                | 1,803 |
| weekday(2) | -,016  | ,195 | ,006   | 1  | ,937 | ,985   | ,672                | 1,443 |
| weekday(3) | ,081   | ,191 | ,178   | 1  | ,673 | 1,084  | ,745                | 1,577 |
| weekday(4) | ,244   | ,186 | 1,712  | 1  | ,191 | 1,276  | ,886                | 1,839 |
| weekday(5) | -,059  | ,200 | ,087   | 1  | ,768 | ,943   | ,637                | 1,395 |
| weekday(6) | -,412  | ,218 | 3,586  | 1  | ,058 | ,662   | ,432                | 1,015 |
| holiday(1) | -,466  | ,373 | 1,559  | 1  | ,212 | ,628   | ,302                | 1,304 |
| season     |        |      | 10,304 | 4  | ,036 |        |                     |       |
| season(1)  | -,207  | ,162 | 1,629  | 1  | ,202 | ,813   | ,592                | 1,117 |
| season(2)  | -,096  | ,147 | ,428   | 1  | ,513 | ,909   | ,682                | 1,211 |
| season(3)  | ,067   | ,151 | ,195   | 1  | ,658 | 1,069  | ,796                | 1,436 |
| season(4)  | -,490  | ,181 | 7,340  | 1  | ,007 | ,613   | ,430                | ,873  |
| Constant   | -3,575 | ,395 | 82,069 | 1  | ,000 | ,028   |                     |       |

a. Variable(s) entered on step 1: sv7, VASTY2, weekday, holiday, season.

\*\*

```
LOGISTIC REGRESSION VARIABLES handlt1
/METHOD=ENTER bv1 VASTY2 weekday holiday season
/CONTRAST (bv1)=Indicator(1)
/CONTRAST (VASTY2)=Indicator(1)
/CONTRAST (weekday)=Indicator(1)
/CONTRAST (holiday)=Indicator(1)
/CONTRAST (season)=Indicator(1)
/PRINT=CI(95)
/CRITERIA=PIN(0.05) POUT(0.10) ITERATE(20) CUT(0.5).
```

**Block 1: Method = Enter**

**Omnibus Tests of Model Coefficients**

|        |       | Chi-square | df | Sig. |
|--------|-------|------------|----|------|
| Step 1 | Step  | 230,912    | 48 | ,000 |
|        | Block | 230,912    | 48 | ,000 |
|        | Model | 230,912    | 48 | ,000 |

**Model Summary**

| Step | -2 Log likelihood    | Cox & Snell R Square | Nagelkerke R Square |
|------|----------------------|----------------------|---------------------|
| 1    | 2187,87 <sup>a</sup> | ,018                 | ,104                |

a. Estimation terminated at iteration number 20 because maximum iterations has been reached. Final solution cannot be found.

**Classification Table<sup>a</sup>**

| Observed           |                                | Predicted                      |                           |
|--------------------|--------------------------------|--------------------------------|---------------------------|
|                    |                                | handlt1 händelse larger than 1 | 0 ingen eller en händelse |
| Step 1             | handlt1 händelse larger than 1 | 12229                          | 0                         |
|                    | 0 ingen eller en händelse      | 246                            | 0                         |
| Overall Percentage |                                |                                |                           |

**Classification Table<sup>a</sup>**

| Observed           |                                | Predicted          |
|--------------------|--------------------------------|--------------------|
|                    |                                | Percentage Correct |
| Step 1             | handlt1 händelse larger than 1 | 100,0              |
|                    | 0 ingen eller en händelse      | ,0                 |
| Overall Percentage |                                | 98,0               |

a. The cut value is ,500

**Variables in the Equation**

|                     | B       | S.E.     | Wald    | df | Sig. | Exp(B) | 95% C.I. |
|---------------------|---------|----------|---------|----|------|--------|----------|
|                     |         |          |         |    |      |        | Lower    |
| Step 1 <sup>a</sup> |         |          |         |    |      |        |          |
| bv1                 |         |          | 8,711   | 2  | ,013 |        |          |
| bv1(1)              | -,311   | ,191     | 2,663   | 1  | ,103 | ,732   | ,504     |
| bv1(2)              | ,280    | ,154     | 3,329   | 1  | ,068 | 1,324  | ,979     |
| VASTY2              |         |          | 120,646 | 35 | ,000 |        |          |
| VASTY2(1)           | ,470    | ,576     | ,667    | 1  | ,414 | 1,600  | ,518     |
| VASTY2(2)           | ,745    | ,545     | 1,868   | 1  | ,172 | 2,107  | ,724     |
| VASTY2(3)           | -1,826  | 1,101    | 2,751   | 1  | ,097 | ,161   | ,019     |
| VASTY2(4)           | ,314    | ,579     | ,295    | 1  | ,587 | 1,369  | ,440     |
| VASTY2(5)           | -,507   | ,735     | ,476    | 1  | ,490 | ,602   | ,142     |
| VASTY2(6)           | -17,050 | 2092,869 | ,000    | 1  | ,993 | ,000   | ,000     |
| VASTY2(7)           | ,675    | ,546     | 1,529   | 1  | ,216 | 1,964  | ,674     |
| VASTY2(8)           | ,241    | ,592     | ,166    | 1  | ,684 | 1,272  | ,399     |
| VASTY2(9)           | ,123    | ,612     | ,040    | 1  | ,841 | 1,130  | ,340     |
| VASTY2(10)          | 1,492   | ,501     | 8,885   | 1  | ,003 | 4,447  | 1,667    |
| VASTY2(11)          | 1,428   | ,505     | 8,006   | 1  | ,005 | 4,171  | 1,551    |
| VASTY2(12)          | -,615   | ,735     | ,699    | 1  | ,403 | ,541   | ,128     |
| VASTY2(13)          | -,198   | ,641     | ,095    | 1  | ,758 | ,821   | ,234     |
| VASTY2(14)          | ,079    | ,612     | ,017    | 1  | ,898 | 1,082  | ,326     |
| VASTY2(15)          | ,099    | ,611     | ,026    | 1  | ,871 | 1,104  | ,333     |
| VASTY2(16)          | ,067    | ,739     | ,008    | 1  | ,928 | 1,069  | ,251     |
| VASTY2(17)          | -16,898 | 2088,855 | ,000    | 1  | ,994 | ,000   | ,000     |
| VASTY2(18)          | -16,934 | 2097,755 | ,000    | 1  | ,994 | ,000   | ,000     |
| VASTY2(19)          | -1,378  | 1,105    | 1,554   | 1  | ,212 | ,252   | ,029     |
| VASTY2(20)          | -,494   | ,737     | ,449    | 1  | ,503 | ,610   | ,144     |
| VASTY2(21)          | -,576   | ,735     | ,615    | 1  | ,433 | ,562   | ,133     |
| VASTY2(22)          | ,715    | ,565     | 1,602   | 1  | ,206 | 2,044  | ,676     |
| VASTY2(23)          | 1,624   | ,498     | 10,618  | 1  | ,001 | 5,072  | 1,910    |
| VASTY2(24)          | 1,190   | ,512     | 5,404   | 1  | ,020 | 3,288  | 1,205    |
| VASTY2(25)          | ,526    | ,592     | ,791    | 1  | ,374 | 1,693  | ,531     |
| VASTY2(26)          | -,148   | ,677     | ,048    | 1  | ,827 | ,862   | ,229     |
| VASTY2(27)          | -1,765  | 1,100    | 2,578   | 1  | ,108 | ,171   | ,020     |
| VASTY2(28)          | -1,334  | 1,100    | 1,469   | 1  | ,225 | ,263   | ,030     |
| VASTY2(29)          | -17,017 | 2092,198 | ,000    | 1  | ,994 | ,000   | ,000     |
| VASTY2(30)          | ,383    | ,576     | ,441    | 1  | ,507 | 1,466  | ,474     |
| VASTY2(31)          | 1,060   | ,525     | 4,081   | 1  | ,043 | 2,886  | 1,032    |
| VASTY2(32)          | ,022    | ,639     | ,001    | 1  | ,973 | 1,022  | ,292     |
| VASTY2(33)          | -,227   | ,676     | ,113    | 1  | ,737 | ,797   | ,212     |
| VASTY2(34)          | -1,692  | 1,098    | 2,374   | 1  | ,123 | ,184   | ,021     |
| VASTY2(35)          | ,910    | ,538     | 2,864   | 1  | ,091 | 2,485  | ,866     |
| weekday             |         |          | 2,449   | 6  | ,874 |        |          |
| weekday(1)          | -,122   | ,235     | ,269    | 1  | ,604 | ,885   | ,559     |
| weekday(2)          | -,173   | ,238     | ,525    | 1  | ,469 | ,841   | ,527     |



Variables in the Equation

|                     |            | 95% C.I... |
|---------------------|------------|------------|
|                     |            | Upper      |
| Step 1 <sup>a</sup> | bv1        |            |
|                     | bv1(1)     | 1,065      |
|                     | bv1(2)     | 1,789      |
|                     | VASTY2     |            |
|                     | VASTY2(1)  | 4,944      |
|                     | VASTY2(2)  | 6,137      |
|                     | VASTY2(3)  | 1,393      |
|                     | VASTY2(4)  | 4,258      |
|                     | VASTY2(5)  | 2,545      |
|                     | VASTY2(6)  | .          |
|                     | VASTY2(7)  | 5,725      |
|                     | VASTY2(8)  | 4,058      |
|                     | VASTY2(9)  | 3,755      |
|                     | VASTY2(10) | 11,862     |
|                     | VASTY2(11) | 11,215     |
|                     | VASTY2(12) | 2,285      |
|                     | VASTY2(13) | 2,883      |
|                     | VASTY2(14) | 3,592      |
|                     | VASTY2(15) | 3,660      |
|                     | VASTY2(16) | 4,551      |
|                     | VASTY2(17) | .          |
|                     | VASTY2(18) | .          |
|                     | VASTY2(19) | 2,199      |
|                     | VASTY2(20) | 2,588      |
|                     | VASTY2(21) | 2,373      |
|                     | VASTY2(22) | 6,186      |
|                     | VASTY2(23) | 13,468     |
|                     | VASTY2(24) | 8,968      |
|                     | VASTY2(25) | 5,398      |
|                     | VASTY2(26) | 3,252      |
|                     | VASTY2(27) | 1,477      |
|                     | VASTY2(28) | 2,277      |
|                     | VASTY2(29) | .          |
|                     | VASTY2(30) | 4,534      |
|                     | VASTY2(31) | 8,073      |
|                     | VASTY2(32) | 3,577      |
|                     | VASTY2(33) | 3,001      |
|                     | VASTY2(34) | 1,585      |
|                     | VASTY2(35) | 7,132      |
|                     | weekday    |            |
|                     | weekday(1) | 1,403      |
|                     | weekday(2) | 1,342      |

**Variables in the Equation**

|            | B      | S.E. | Wald   | df | Sig. | Exp(B) | 95% C.I. |
|------------|--------|------|--------|----|------|--------|----------|
|            |        |      |        |    |      |        | Lower    |
| weekday(3) | ,007   | ,229 | ,001   | 1  | ,975 | 1,007  | ,643     |
| weekday(4) | -,063  | ,235 | ,071   | 1  | ,790 | ,939   | ,593     |
| weekday(5) | -,335  | ,258 | 1,695  | 1  | ,193 | ,715   | ,431     |
| weekday(6) | -,086  | ,239 | ,129   | 1  | ,720 | ,918   | ,574     |
| holiday(1) | -,796  | ,595 | 1,790  | 1  | ,181 | ,451   | ,140     |
| season     |        |      | 5,283  | 4  | ,259 |        |          |
| season(1)  | ,084   | ,198 | ,181   | 1  | ,671 | 1,088  | ,738     |
| season(2)  | -,195  | ,199 | ,952   | 1  | ,329 | ,823   | ,557     |
| season(3)  | ,245   | ,190 | 1,668  | 1  | ,197 | 1,278  | ,881     |
| season(4)  | -,100  | ,214 | ,217   | 1  | ,641 | ,905   | ,596     |
| Constant   | -4,109 | ,491 | 70,152 | 1  | ,000 | ,016   |          |

**Variables in the Equation**

|            | 95% C.I. |
|------------|----------|
|            | Upper    |
| weekday(3) | 1,577    |
| weekday(4) | 1,489    |
| weekday(5) | 1,185    |
| weekday(6) | 1,466    |
| holiday(1) | 1,448    |
| season     |          |
| season(1)  | 1,603    |
| season(2)  | 1,217    |
| season(3)  | 1,853    |
| season(4)  | 1,376    |
| Constant   |          |

a. Variable(s) entered on step 1: bv1, VASTY2, weekday, holiday, season.

```
LOGISTIC REGRESSION VARIABLES handlt1
/METHOD=ENTER bv2 VASTY2 weekday holiday season
/CONTRAST (bv2)=Indicator(1)
/CONTRAST (VASTY2)=Indicator(1)
/CONTRAST (weekday)=Indicator(1)
/CONTRAST (holiday)=Indicator(1)
/CONTRAST (season)=Indicator(1)
/PRINT=CI(95)
/CRITERIA=PIN(0.05) POUT(0.10) ITERATE(20) CUT(0.5).
```

**Block 1: Method = Enter**

**Omnibus Tests of Model Coefficients**

|        |       | Chi-square | df | Sig. |
|--------|-------|------------|----|------|
| Step 1 | Step  | 228,418    | 48 | ,000 |
|        | Block | 228,418    | 48 | ,000 |
|        | Model | 228,418    | 48 | ,000 |

**Model Summary**

| Step | -2 Log likelihood    | Cox & Snell R Square | Nagelkerke R Square |
|------|----------------------|----------------------|---------------------|
| 1    | 2190,36 <sup>a</sup> | ,018                 | ,103                |

a. Estimation terminated at iteration number 20 because maximum iterations has been reached. Final solution cannot be found.

**Classification Table<sup>a</sup>**

|                    |                                | Predicted                 |                      |
|--------------------|--------------------------------|---------------------------|----------------------|
|                    |                                | 0 ingen eller en händelse | 1 mer än en händelse |
| Observed           | handlt1 händelse larger than 1 | 12229                     | 0                    |
|                    | 0 ingen eller en händelse      | 246                       | 0                    |
| Overall Percentage |                                |                           |                      |

**Classification Table<sup>a</sup>**

|                    |                                | Predicted          |
|--------------------|--------------------------------|--------------------|
| Observed           |                                | Percentage Correct |
| Step 1             | handlt1 händelse larger than 1 | 100,0              |
|                    | 0 ingen eller en händelse      | ,0                 |
| Overall Percentage |                                | 98,0               |

a. The cut value is ,500

**Variables in the Equation**

|                     | B       | S.E.     | Wald    | df | Sig. | Exp(B) | 95% C.I. |
|---------------------|---------|----------|---------|----|------|--------|----------|
|                     |         |          |         |    |      |        | Lower    |
| Step 1 <sup>a</sup> |         |          |         |    |      |        |          |
| bv2                 |         |          | 6,307   | 2  | ,043 |        |          |
| bv2(1)              | -,211   | ,190     | 1,234   | 1  | ,267 | ,810   | ,559     |
| bv2(2)              | ,212    | ,171     | 1,537   | 1  | ,215 | 1,237  | ,884     |
| VASTY2              |         |          | 120,890 | 35 | ,000 |        |          |
| VASTY2(1)           | ,460    | ,576     | ,638    | 1  | ,424 | 1,584  | ,513     |
| VASTY2(2)           | ,750    | ,545     | 1,889   | 1  | ,169 | 2,116  | ,727     |
| VASTY2(3)           | -1,780  | 1,100    | 2,618   | 1  | ,106 | ,169   | ,020     |
| VASTY2(4)           | ,345    | ,578     | ,356    | 1  | ,551 | 1,412  | ,455     |
| VASTY2(5)           | -,502   | ,735     | ,466    | 1  | ,495 | ,605   | ,143     |
| VASTY2(6)           | -17,014 | 2094,841 | ,000    | 1  | ,994 | ,000   | ,000     |
| VASTY2(7)           | ,724    | ,544     | 1,775   | 1  | ,183 | 2,063  | ,711     |
| VASTY2(8)           | ,244    | ,592     | ,170    | 1  | ,680 | 1,276  | ,400     |
| VASTY2(9)           | ,134    | ,612     | ,048    | 1  | ,827 | 1,143  | ,344     |
| VASTY2(10)          | 1,501   | ,501     | 8,989   | 1  | ,003 | 4,487  | 1,682    |
| VASTY2(11)          | 1,443   | ,504     | 8,185   | 1  | ,004 | 4,232  | 1,575    |
| VASTY2(12)          | -,604   | ,735     | ,675    | 1  | ,411 | ,547   | ,129     |
| VASTY2(13)          | -,172   | ,641     | ,072    | 1  | ,788 | ,842   | ,240     |
| VASTY2(14)          | ,094    | ,612     | ,023    | 1  | ,878 | 1,098  | ,331     |
| VASTY2(15)          | ,099    | ,612     | ,026    | 1  | ,872 | 1,104  | ,333     |
| VASTY2(16)          | ,082    | ,739     | ,012    | 1  | ,912 | 1,085  | ,255     |
| VASTY2(17)          | -16,892 | 2090,901 | ,000    | 1  | ,994 | ,000   | ,000     |
| VASTY2(18)          | -16,934 | 2098,904 | ,000    | 1  | ,994 | ,000   | ,000     |
| VASTY2(19)          | -1,441  | 1,102    | 1,708   | 1  | ,191 | ,237   | ,027     |
| VASTY2(20)          | -,464   | ,737     | ,397    | 1  | ,528 | ,629   | ,148     |
| VASTY2(21)          | -,570   | ,735     | ,601    | 1  | ,438 | ,566   | ,134     |
| VASTY2(22)          | ,716    | ,565     | 1,603   | 1  | ,205 | 2,046  | ,675     |
| VASTY2(23)          | 1,616   | ,498     | 10,528  | 1  | ,001 | 5,034  | 1,896    |
| VASTY2(24)          | 1,222   | ,512     | 5,700   | 1  | ,017 | 3,393  | 1,245    |
| VASTY2(25)          | ,531    | ,592     | ,804    | 1  | ,370 | 1,700  | ,533     |
| VASTY2(26)          | -,139   | ,677     | ,042    | 1  | ,838 | ,871   | ,231     |
| VASTY2(27)          | -1,750  | 1,099    | 2,535   | 1  | ,111 | ,174   | ,020     |
| VASTY2(28)          | -1,329  | 1,101    | 1,458   | 1  | ,227 | ,265   | ,031     |
| VASTY2(29)          | -16,999 | 2092,769 | ,000    | 1  | ,994 | ,000   | ,000     |
| VASTY2(30)          | ,398    | ,576     | ,479    | 1  | ,489 | 1,490  | ,482     |
| VASTY2(31)          | 1,070   | ,524     | 4,177   | 1  | ,041 | 2,916  | 1,045    |
| VASTY2(32)          | ,017    | ,638     | ,001    | 1  | ,979 | 1,017  | ,291     |
| VASTY2(33)          | -,230   | ,676     | ,115    | 1  | ,734 | ,795   | ,211     |
| VASTY2(34)          | -1,681  | 1,098    | 2,343   | 1  | ,126 | ,186   | ,022     |
| VASTY2(35)          | ,954    | ,536     | 3,167   | 1  | ,075 | 2,596  | ,908     |
| weekday             |         |          | 2,461   | 6  | ,873 |        |          |
| weekday(1)          | -,116   | ,235     | ,243    | 1  | ,622 | ,891   | ,562     |
| weekday(2)          | -,168   | ,238     | ,498    | 1  | ,481 | ,845   | ,530     |

Variables in the Equation

|                     |            | 95% C.I... |
|---------------------|------------|------------|
|                     |            | Upper      |
| Step 1 <sup>a</sup> | bv2        |            |
|                     | bv2(1)     | 1,175      |
|                     | bv2(2)     | 1,730      |
|                     | VASTY2     |            |
|                     | VASTY2(1)  | 4,893      |
|                     | VASTY2(2)  | 6,164      |
|                     | VASTY2(3)  | 1,457      |
|                     | VASTY2(4)  | 4,384      |
|                     | VASTY2(5)  | 2,558      |
|                     | VASTY2(6)  | .          |
|                     | VASTY2(7)  | 5,988      |
|                     | VASTY2(8)  | 4,073      |
|                     | VASTY2(9)  | 3,796      |
|                     | VASTY2(10) | 11,970     |
|                     | VASTY2(11) | 11,370     |
|                     | VASTY2(12) | 2,310      |
|                     | VASTY2(13) | 2,956      |
|                     | VASTY2(14) | 3,644      |
|                     | VASTY2(15) | 3,660      |
|                     | VASTY2(16) | 4,616      |
|                     | VASTY2(17) | .          |
|                     | VASTY2(18) | .          |
|                     | VASTY2(19) | 2,055      |
|                     | VASTY2(20) | 2,663      |
|                     | VASTY2(21) | 2,388      |
|                     | VASTY2(22) | 6,198      |
|                     | VASTY2(23) | 13,362     |
|                     | VASTY2(24) | 9,249      |
|                     | VASTY2(25) | 5,421      |
|                     | VASTY2(26) | 3,282      |
|                     | VASTY2(27) | 1,498      |
|                     | VASTY2(28) | 2,289      |
|                     | VASTY2(29) | .          |
|                     | VASTY2(30) | 4,606      |
|                     | VASTY2(31) | 8,140      |
|                     | VASTY2(32) | 3,553      |
|                     | VASTY2(33) | 2,989      |
|                     | VASTY2(34) | 1,602      |
|                     | VASTY2(35) | 7,423      |
|                     | weekday    |            |
|                     | weekday(1) | 1,411      |
|                     | weekday(2) | 1,348      |

**Variables in the Equation**

|            | B      | S.E. | Wald   | df | Sig. | Exp(B) | 95% C.I. |
|------------|--------|------|--------|----|------|--------|----------|
|            |        |      |        |    |      |        | Lower    |
| weekday(3) | ,010   | ,229 | ,002   | 1  | ,967 | 1,010  | ,645     |
| weekday(4) | -,070  | ,235 | ,089   | 1  | ,766 | ,932   | ,588     |
| weekday(5) | -,339  | ,258 | 1,729  | 1  | ,188 | ,712   | ,430     |
| weekday(6) | -,088  | ,239 | ,136   | 1  | ,712 | ,916   | ,573     |
| holiday(1) | -,795  | ,595 | 1,784  | 1  | ,182 | ,451   | ,141     |
| season     |        |      | 5,407  | 4  | ,248 |        |          |
| season(1)  | ,079   | ,198 | ,158   | 1  | ,691 | 1,082  | ,734     |
| season(2)  | -,209  | ,199 | 1,104  | 1  | ,293 | ,811   | ,549     |
| season(3)  | ,238   | ,190 | 1,573  | 1  | ,210 | 1,268  | ,875     |
| season(4)  | -,105  | ,214 | ,242   | 1  | ,623 | ,900   | ,592     |
| Constant   | -4,117 | ,499 | 68,130 | 1  | ,000 | ,016   |          |

**Variables in the Equation**

|            | 95% C.I. |
|------------|----------|
|            | Upper    |
| weekday(3) | 1,581    |
| weekday(4) | 1,477    |
| weekday(5) | 1,181    |
| weekday(6) | 1,463    |
| holiday(1) | 1,450    |
| season     |          |
| season(1)  | 1,594    |
| season(2)  | 1,199    |
| season(3)  | 1,839    |
| season(4)  | 1,368    |
| Constant   |          |

a. Variable(s) entered on step 1: bv2, VASTY2, weekday, holiday, season.

```
LOGISTIC REGRESSION VARIABLES handlt1
/METHOD=ENTER bv3 VASTY2 weekday holiday season
/CONTRAST (bv3)=Indicator(1)
/CONTRAST (VASTY2)=Indicator(1)
/CONTRAST (weekday)=Indicator(1)
/CONTRAST (holiday)=Indicator(1)
/CONTRAST (season)=Indicator(1)
/PRINT=CI(95)
/CRITERIA=PIN(0.05) POUT(0.10) ITERATE(20) CUT(0.5).
```

**Block 1: Method = Enter**

**Omnibus Tests of Model Coefficients**

|        |       | Chi-square | df | Sig. |
|--------|-------|------------|----|------|
| Step 1 | Step  | 224,832    | 48 | ,000 |
|        | Block | 224,832    | 48 | ,000 |
|        | Model | 224,832    | 48 | ,000 |

**Model Summary**

| Step | -2 Log likelihood    | Cox & Snell R Square | Nagelkerke R Square |
|------|----------------------|----------------------|---------------------|
| 1    | 2193,95 <sup>a</sup> | ,018                 | ,101                |

a. Estimation terminated at iteration number 20 because maximum iterations has been reached. Final solution cannot be found.

**Classification Table<sup>a</sup>**

| Observed           |                                | Predicted                      |                           |
|--------------------|--------------------------------|--------------------------------|---------------------------|
|                    |                                | handlt1 händelse larger than 1 | 0 ingen eller en händelse |
| Step 1             | handlt1 händelse larger than 1 | 12229                          | 0                         |
|                    | 0 ingen eller en händelse      | 246                            | 0                         |
| Overall Percentage |                                |                                |                           |

**Classification Table<sup>a</sup>**

| Observed           |                                | Predicted          |
|--------------------|--------------------------------|--------------------|
|                    |                                | Percentage Correct |
| Step 1             | handlt1 händelse larger than 1 | 100,0              |
|                    | 0 ingen eller en händelse      | ,0                 |
| Overall Percentage |                                | 98,0               |

a. The cut value is ,500

**Variables in the Equation**

|                         | B       | S.E.     | Wald    | df | Sig. | Exp(B) | 95% C.I. |
|-------------------------|---------|----------|---------|----|------|--------|----------|
|                         |         |          |         |    |      |        | Lower    |
| Step 1 <sup>a</sup> bv3 |         |          | 2,604   | 2  | ,272 |        |          |
| bv3(1)                  | -,422   | ,262     | 2,592   | 1  | ,107 | ,656   | ,393     |
| bv3(2)                  | -,054   | ,196     | ,075    | 1  | ,784 | ,948   | ,645     |
| VASTY2                  |         |          | 118,563 | 35 | ,000 |        |          |
| VASTY2(1)               | ,519    | ,576     | ,811    | 1  | ,368 | 1,680  | ,544     |
| VASTY2(2)               | ,795    | ,545     | 2,127   | 1  | ,145 | 2,214  | ,761     |
| VASTY2(3)               | -1,630  | 1,100    | 2,197   | 1  | ,138 | ,196   | ,023     |
| VASTY2(4)               | ,475    | ,578     | ,676    | 1  | ,411 | 1,609  | ,518     |
| VASTY2(5)               | -,430   | ,735     | ,342    | 1  | ,559 | ,651   | ,154     |
| VASTY2(6)               | -16,906 | 2096,940 | ,000    | 1  | ,994 | ,000   | ,000     |
| VASTY2(7)               | ,916    | ,549     | 2,786   | 1  | ,095 | 2,500  | ,852     |
| VASTY2(8)               | ,331    | ,591     | ,314    | 1  | ,575 | 1,393  | ,437     |
| VASTY2(9)               | ,237    | ,611     | ,151    | 1  | ,698 | 1,268  | ,383     |
| VASTY2(10)              | 1,560   | ,500     | 9,739   | 1  | ,002 | 4,757  | 1,786    |
| VASTY2(11)              | 1,495   | ,504     | 8,801   | 1  | ,003 | 4,461  | 1,661    |
| VASTY2(12)              | -,533   | ,734     | ,526    | 1  | ,468 | ,587   | ,139     |
| VASTY2(13)              | -,017   | ,638     | ,001    | 1  | ,978 | ,983   | ,281     |
| VASTY2(14)              | ,186    | ,611     | ,093    | 1  | ,761 | 1,204  | ,364     |
| VASTY2(15)              | ,176    | ,611     | ,083    | 1  | ,774 | 1,192  | ,360     |
| VASTY2(16)              | ,157    | ,740     | ,045    | 1  | ,832 | 1,170  | ,274     |
| VASTY2(17)              | -16,892 | 2092,116 | ,000    | 1  | ,994 | ,000   | ,000     |
| VASTY2(18)              | -16,881 | 2100,924 | ,000    | 1  | ,994 | ,000   | ,000     |
| VASTY2(19)              | -1,387  | 1,107    | 1,570   | 1  | ,210 | ,250   | ,029     |
| VASTY2(20)              | -,351   | ,737     | ,227    | 1  | ,634 | ,704   | ,166     |
| VASTY2(21)              | -,516   | ,734     | ,493    | 1  | ,483 | ,597   | ,142     |
| VASTY2(22)              | ,636    | ,563     | 1,272   | 1  | ,259 | 1,888  | ,626     |
| VASTY2(23)              | 1,627   | ,498     | 10,668  | 1  | ,001 | 5,089  | 1,917    |
| VASTY2(24)              | 1,337   | ,511     | 6,841   | 1  | ,009 | 3,809  | 1,398    |
| VASTY2(25)              | ,544    | ,592     | ,844    | 1  | ,358 | 1,722  | ,540     |
| VASTY2(26)              | -,046   | ,677     | ,005    | 1  | ,945 | ,955   | ,253     |
| VASTY2(27)              | -1,633  | 1,099    | 2,210   | 1  | ,137 | ,195   | ,023     |
| VASTY2(28)              | -1,230  | 1,100    | 1,252   | 1  | ,263 | ,292   | ,034     |
| VASTY2(29)              | -16,968 | 2095,762 | ,000    | 1  | ,994 | ,000   | ,000     |
| VASTY2(30)              | ,434    | ,576     | ,567    | 1  | ,451 | 1,543  | ,499     |
| VASTY2(31)              | 1,180   | ,526     | 5,037   | 1  | ,025 | 3,255  | 1,161    |
| VASTY2(32)              | ,100    | ,641     | ,024    | 1  | ,876 | 1,105  | ,315     |
| VASTY2(33)              | -,155   | ,677     | ,052    | 1  | ,819 | ,856   | ,227     |
| VASTY2(34)              | -1,651  | 1,098    | 2,261   | 1  | ,133 | ,192   | ,022     |
| VASTY2(35)              | 1,097   | ,538     | 4,159   | 1  | ,041 | 2,995  | 1,044    |
| weekday                 |         |          | 2,959   | 6  | ,814 |        |          |
| weekday(1)              | -,126   | ,235     | ,289    | 1  | ,591 | ,882   | ,557     |
| weekday(2)              | -,186   | ,238     | ,609    | 1  | ,435 | ,830   | ,521     |



Variables in the Equation

|                     |            | 95% C.I... |
|---------------------|------------|------------|
|                     |            | Upper      |
| Step 1 <sup>a</sup> | bv3        |            |
|                     | bv3(1)     | 1,096      |
|                     | bv3(2)     | 1,392      |
|                     | VASTY2     |            |
|                     | VASTY2(1)  | 5,190      |
|                     | VASTY2(2)  | 6,442      |
|                     | VASTY2(3)  | 1,692      |
|                     | VASTY2(4)  | 4,995      |
|                     | VASTY2(5)  | 2,747      |
|                     | VASTY2(6)  | .          |
|                     | VASTY2(7)  | 7,331      |
|                     | VASTY2(8)  | 4,434      |
|                     | VASTY2(9)  | 4,201      |
|                     | VASTY2(10) | 12,668     |
|                     | VASTY2(11) | 11,982     |
|                     | VASTY2(12) | 2,476      |
|                     | VASTY2(13) | 3,435      |
|                     | VASTY2(14) | 3,988      |
|                     | VASTY2(15) | 3,944      |
|                     | VASTY2(16) | 4,988      |
|                     | VASTY2(17) | .          |
|                     | VASTY2(18) | .          |
|                     | VASTY2(19) | 2,187      |
|                     | VASTY2(20) | 2,984      |
|                     | VASTY2(21) | 2,519      |
|                     | VASTY2(22) | 5,697      |
|                     | VASTY2(23) | 13,512     |
|                     | VASTY2(24) | 10,374     |
|                     | VASTY2(25) | 5,495      |
|                     | VASTY2(26) | 3,595      |
|                     | VASTY2(27) | 1,682      |
|                     | VASTY2(28) | 2,522      |
|                     | VASTY2(29) | .          |
|                     | VASTY2(30) | 4,768      |
|                     | VASTY2(31) | 9,126      |
|                     | VASTY2(32) | 3,883      |
|                     | VASTY2(33) | 3,230      |
|                     | VASTY2(34) | 1,651      |
|                     | VASTY2(35) | 8,595      |
|                     | weekday    |            |
|                     | weekday(1) | 1,396      |
|                     | weekday(2) | 1,324      |

**Variables in the Equation**

|            | B      | S.E. | Wald   | df | Sig. | Exp(B) | 95% C.I. |
|------------|--------|------|--------|----|------|--------|----------|
|            |        |      |        |    |      |        | Lower    |
| weekday(3) | -,007  | ,229 | ,001   | 1  | ,976 | ,993   | ,634     |
| weekday(4) | -,091  | ,235 | ,151   | 1  | ,697 | ,913   | ,576     |
| weekday(5) | -,384  | ,257 | 2,234  | 1  | ,135 | ,681   | ,412     |
| weekday(6) | -,110  | ,239 | ,211   | 1  | ,646 | ,896   | ,561     |
| holiday(1) | -,802  | ,595 | 1,815  | 1  | ,178 | ,448   | ,140     |
| season     |        |      | 5,945  | 4  | ,203 |        |          |
| season(1)  | ,060   | ,198 | ,091   | 1  | ,763 | 1,061  | ,720     |
| season(2)  | -,258  | ,199 | 1,681  | 1  | ,195 | ,773   | ,523     |
| season(3)  | ,219   | ,189 | 1,334  | 1  | ,248 | 1,245  | ,859     |
| season(4)  | -,113  | ,213 | ,278   | 1  | ,598 | ,894   | ,588     |
| Constant   | -4,072 | ,487 | 69,792 | 1  | ,000 | ,017   |          |

**Variables in the Equation**

|            | 95% C.I. |
|------------|----------|
|            | Upper    |
| weekday(3) | 1,555    |
| weekday(4) | 1,446    |
| weekday(5) | 1,127    |
| weekday(6) | 1,431    |
| holiday(1) | 1,440    |
| season     |          |
| season(1)  | 1,564    |
| season(2)  | 1,141    |
| season(3)  | 1,804    |
| season(4)  | 1,358    |
| Constant   |          |

a. Variable(s) entered on step 1: bv3, VASTY2, weekday, holiday, season.

```
LOGISTIC REGRESSION VARIABLES handlt1
/METHOD=ENTER sv3 VASTY2 weekday holiday season
/CONTRAST (sv3)=Indicator(1)
/CONTRAST (VASTY2)=Indicator(1)
/CONTRAST (weekday)=Indicator(1)
/CONTRAST (holiday)=Indicator(1)
/CONTRAST (season)=Indicator(1)
/PRINT=CI(95)
/CRITERIA=PIN(0.05) POUT(0.10) ITERATE(20) CUT(0.5).
```

**Block 1: Method = Enter**

**Omnibus Tests of Model Coefficients**

|        |       | Chi-square | df | Sig. |
|--------|-------|------------|----|------|
| Step 1 | Step  | 222,666    | 48 | ,000 |
|        | Block | 222,666    | 48 | ,000 |
|        | Model | 222,666    | 48 | ,000 |

**Model Summary**

| Step | -2 Log likelihood    | Cox & Snell R Square | Nagelkerke R Square |
|------|----------------------|----------------------|---------------------|
| 1    | 2196,12 <sup>a</sup> | ,018                 | ,100                |

a. Estimation terminated at iteration number 20 because maximum iterations has been reached. Final solution cannot be found.

**Classification Table<sup>a</sup>**

|                    |                                | Predicted                      |                           |
|--------------------|--------------------------------|--------------------------------|---------------------------|
|                    |                                | handlt1 händelse larger than 1 | 0 ingen eller en händelse |
| Observed           | handlt1 händelse larger than 1 | 12229                          | 0                         |
|                    | 0 ingen eller en händelse      | 246                            | 0                         |
| Overall Percentage |                                |                                |                           |

**Classification Table<sup>a</sup>**

|                    |                                | Predicted          |
|--------------------|--------------------------------|--------------------|
| Observed           |                                | Percentage Correct |
| Step 1             | handlt1 händelse larger than 1 | 100,0              |
|                    | 0 ingen eller en händelse      | ,0                 |
| Overall Percentage |                                | 98,0               |

a. The cut value is ,500

**Variables in the Equation**

|                         | B       | S.E.     | Wald    | df | Sig. | Exp(B) | 95% C.I. |
|-------------------------|---------|----------|---------|----|------|--------|----------|
|                         |         |          |         |    |      |        | Lower    |
| Step 1 <sup>a</sup> sv3 |         |          | ,684    | 2  | ,710 |        |          |
| sv3(1)                  | ,011    | ,182     | ,003    | 1  | ,954 | 1,011  | ,707     |
| sv3(2)                  | ,140    | ,181     | ,603    | 1  | ,438 | 1,151  | ,807     |
| VASTY2                  |         |          | 118,820 | 35 | ,000 |        |          |
| VASTY2(1)               | ,451    | ,577     | ,611    | 1  | ,435 | 1,570  | ,507     |
| VASTY2(2)               | ,737    | ,551     | 1,786   | 1  | ,181 | 2,089  | ,709     |
| VASTY2(3)               | -1,605  | 1,098    | 2,134   | 1  | ,144 | ,201   | ,023     |
| VASTY2(4)               | ,480    | ,576     | ,695    | 1  | ,404 | 1,616  | ,523     |
| VASTY2(5)               | -,412   | ,737     | ,312    | 1  | ,577 | ,663   | ,156     |
| VASTY2(6)               | -17,006 | 2097,861 | ,000    | 1  | ,994 | ,000   | ,000     |
| VASTY2(7)               | ,915    | ,538     | 2,893   | 1  | ,089 | 2,498  | ,870     |
| VASTY2(8)               | ,369    | ,592     | ,389    | 1  | ,533 | 1,447  | ,453     |
| VASTY2(9)               | ,237    | ,611     | ,151    | 1  | ,698 | 1,268  | ,383     |
| VASTY2(10)              | 1,500   | ,509     | 8,699   | 1  | ,003 | 4,484  | 1,654    |
| VASTY2(11)              | 1,480   | ,504     | 8,629   | 1  | ,003 | 4,392  | 1,636    |
| VASTY2(12)              | -,583   | ,739     | ,622    | 1  | ,430 | ,558   | ,131     |
| VASTY2(13)              | -,088   | ,646     | ,019    | 1  | ,891 | ,916   | ,258     |
| VASTY2(14)              | ,137    | ,613     | ,050    | 1  | ,824 | 1,146  | ,345     |
| VASTY2(15)              | ,112    | ,617     | ,033    | 1  | ,856 | 1,118  | ,334     |
| VASTY2(16)              | ,073    | ,739     | ,010    | 1  | ,921 | 1,076  | ,253     |
| VASTY2(17)              | -16,912 | 2094,856 | ,000    | 1  | ,994 | ,000   | ,000     |
| VASTY2(18)              | -16,890 | 2103,933 | ,000    | 1  | ,994 | ,000   | ,000     |
| VASTY2(19)              | -1,592  | 1,105    | 2,076   | 1  | ,150 | ,204   | ,023     |
| VASTY2(20)              | -,423   | ,737     | ,329    | 1  | ,566 | ,655   | ,154     |
| VASTY2(21)              | -,501   | ,735     | ,466    | 1  | ,495 | ,606   | ,143     |
| VASTY2(22)              | ,597    | ,563     | 1,122   | 1  | ,289 | 1,816  | ,602     |
| VASTY2(23)              | 1,605   | ,498     | 10,374  | 1  | ,001 | 4,978  | 1,874    |
| VASTY2(24)              | 1,318   | ,510     | 6,681   | 1  | ,010 | 3,736  | 1,375    |
| VASTY2(25)              | ,531    | ,593     | ,802    | 1  | ,370 | 1,701  | ,532     |
| VASTY2(26)              | -,078   | ,676     | ,013    | 1  | ,909 | ,925   | ,246     |
| VASTY2(27)              | -1,707  | 1,100    | 2,406   | 1  | ,121 | ,181   | ,021     |
| VASTY2(28)              | -1,304  | 1,105    | 1,393   | 1  | ,238 | ,271   | ,031     |
| VASTY2(29)              | -17,049 | 2095,904 | ,000    | 1  | ,994 | ,000   | ,000     |
| VASTY2(30)              | ,466    | ,577     | ,652    | 1  | ,419 | 1,594  | ,514     |
| VASTY2(31)              | 1,126   | ,533     | 4,461   | 1  | ,035 | 3,084  | 1,085    |
| VASTY2(32)              | ,012    | ,649     | ,000    | 1  | ,985 | 1,013  | ,284     |
| VASTY2(33)              | -,218   | ,686     | ,100    | 1  | ,751 | ,804   | ,210     |
| VASTY2(34)              | -1,649  | 1,098    | 2,254   | 1  | ,133 | ,192   | ,022     |
| VASTY2(35)              | 1,051   | ,534     | 3,880   | 1  | ,049 | 2,861  | 1,005    |
| weekday                 |         |          | 3,005   | 6  | ,808 |        |          |
| weekday(1)              | -,114   | ,235     | ,237    | 1  | ,626 | ,892   | ,563     |
| weekday(2)              | -,175   | ,238     | ,537    | 1  | ,464 | ,840   | ,527     |

Variables in the Equation

|                     |            | 95% C.I... |
|---------------------|------------|------------|
|                     |            | Upper      |
| Step 1 <sup>a</sup> | sv3        |            |
|                     | sv3(1)     | 1,444      |
|                     | sv3(2)     | 1,640      |
|                     | VASTY2     |            |
|                     | VASTY2(1)  | 4,863      |
|                     | VASTY2(2)  | 6,155      |
|                     | VASTY2(3)  | 1,730      |
|                     | VASTY2(4)  | 4,997      |
|                     | VASTY2(5)  | 2,810      |
|                     | VASTY2(6)  | .          |
|                     | VASTY2(7)  | 7,172      |
|                     | VASTY2(8)  | 4,617      |
|                     | VASTY2(9)  | 4,196      |
|                     | VASTY2(10) | 12,153     |
|                     | VASTY2(11) | 11,789     |
|                     | VASTY2(12) | 2,376      |
|                     | VASTY2(13) | 3,247      |
|                     | VASTY2(14) | 3,814      |
|                     | VASTY2(15) | 3,746      |
|                     | VASTY2(16) | 4,578      |
|                     | VASTY2(17) | .          |
|                     | VASTY2(18) | .          |
|                     | VASTY2(19) | 1,775      |
|                     | VASTY2(20) | 2,779      |
|                     | VASTY2(21) | 2,557      |
|                     | VASTY2(22) | 5,475      |
|                     | VASTY2(23) | 13,219     |
|                     | VASTY2(24) | 10,148     |
|                     | VASTY2(25) | 5,439      |
|                     | VASTY2(26) | 3,483      |
|                     | VASTY2(27) | 1,568      |
|                     | VASTY2(28) | 2,367      |
|                     | VASTY2(29) | .          |
|                     | VASTY2(30) | 4,941      |
|                     | VASTY2(31) | 8,770      |
|                     | VASTY2(32) | 3,612      |
|                     | VASTY2(33) | 3,088      |
|                     | VASTY2(34) | 1,655      |
|                     | VASTY2(35) | 8,145      |
|                     | weekday    |            |
|                     | weekday(1) | 1,413      |
|                     | weekday(2) | 1,339      |

**Variables in the Equation**

|            | B      | S.E. | Wald   | df | Sig. | Exp(B) | 95% C.I. |
|------------|--------|------|--------|----|------|--------|----------|
|            |        |      |        |    |      |        | Lower    |
| weekday(3) | ,004   | ,229 | ,000   | 1  | ,985 | 1,004  | ,641     |
| weekday(4) | -,079  | ,235 | ,113   | 1  | ,737 | ,924   | ,582     |
| weekday(5) | -,383  | ,258 | 2,212  | 1  | ,137 | ,682   | ,411     |
| weekday(6) | -,125  | ,239 | ,273   | 1  | ,602 | ,883   | ,553     |
| holiday(1) | -,822  | ,596 | 1,906  | 1  | ,167 | ,439   | ,137     |
| season     |        |      | 6,179  | 4  | ,186 |        |          |
| season(1)  | ,059   | ,197 | ,089   | 1  | ,765 | 1,061  | ,720     |
| season(2)  | -,265  | ,199 | 1,767  | 1  | ,184 | ,767   | ,520     |
| season(3)  | ,220   | ,190 | 1,344  | 1  | ,246 | 1,246  | ,859     |
| season(4)  | -,121  | ,213 | ,322   | 1  | ,570 | ,886   | ,583     |
| Constant   | -4,145 | ,495 | 70,173 | 1  | ,000 | ,016   |          |

**Variables in the Equation**

|            | 95% C.I. |
|------------|----------|
|            | Upper    |
| weekday(3) | 1,573    |
| weekday(4) | 1,466    |
| weekday(5) | 1,130    |
| weekday(6) | 1,410    |
| holiday(1) | 1,412    |
| season     |          |
| season(1)  | 1,562    |
| season(2)  | 1,134    |
| season(3)  | 1,806    |
| season(4)  | 1,346    |
| Constant   |          |

a. Variable(s) entered on step 1: sv3, VASTY2, weekday, holiday, season.

```
LOGISTIC REGRESSION VARIABLES handlt1
/METHOD=ENTER sv5 VASTY2 weekday holiday season
/CONTRAST (sv5)=Indicator(1)
/CONTRAST (VASTY2)=Indicator(1)
/CONTRAST (weekday)=Indicator(1)
/CONTRAST (holiday)=Indicator(1)
/CONTRAST (season)=Indicator(1)
/PRINT=CI(95)
/CRITERIA=PIN(0.05) POUT(0.10) ITERATE(20) CUT(0.5).
```

**Block 1: Method = Enter**

**Omnibus Tests of Model Coefficients**

|        |       | Chi-square | df | Sig. |
|--------|-------|------------|----|------|
| Step 1 | Step  | 224,307    | 50 | ,000 |
|        | Block | 224,307    | 50 | ,000 |
|        | Model | 224,307    | 50 | ,000 |

**Model Summary**

| Step | -2 Log likelihood    | Cox & Snell R Square | Nagelkerke R Square |
|------|----------------------|----------------------|---------------------|
| 1    | 2194,48 <sup>a</sup> | ,018                 | ,101                |

a. Estimation terminated at iteration number 20 because maximum iterations has been reached. Final solution cannot be found.

**Classification Table<sup>a</sup>**

| Observed           |                                | Predicted                      |                           |
|--------------------|--------------------------------|--------------------------------|---------------------------|
|                    |                                | handlt1 händelse larger than 1 | 0 ingen eller en händelse |
| Step 1             | handlt1 händelse larger than 1 | 12229                          | 0                         |
|                    | 0 ingen eller en händelse      | 246                            | 0                         |
| Overall Percentage |                                |                                |                           |

**Classification Table<sup>a</sup>**

| Observed           |                                | Predicted          |
|--------------------|--------------------------------|--------------------|
|                    |                                | Percentage Correct |
| Step 1             | handlt1 händelse larger than 1 | 100,0              |
|                    | 0 ingen eller en händelse      | ,0                 |
| Overall Percentage |                                | 98,0               |

a. The cut value is ,500

**Variables in the Equation**

|                         | B       | S.E.     | Wald    | df | Sig. | Exp(B) | 95% C.I. |
|-------------------------|---------|----------|---------|----|------|--------|----------|
|                         |         |          |         |    |      |        | Lower    |
| Step 1 <sup>a</sup> sv5 |         |          | 2,348   | 4  | ,672 |        |          |
| sv5(1)                  | -,043   | ,232     | ,035    | 1  | ,852 | ,958   | ,608     |
| sv5(2)                  | ,042    | ,231     | ,034    | 1  | ,854 | 1,043  | ,664     |
| sv5(3)                  | -,047   | ,218     | ,046    | 1  | ,830 | ,954   | ,623     |
| sv5(4)                  | ,260    | ,236     | 1,209   | 1  | ,272 | 1,297  | ,816     |
| VASTY2                  |         |          | 118,861 | 35 | ,000 |        |          |
| VASTY2(1)               | ,432    | ,577     | ,560    | 1  | ,454 | 1,541  | ,497     |
| VASTY2(2)               | ,666    | ,556     | 1,435   | 1  | ,231 | 1,947  | ,654     |
| VASTY2(3)               | -1,616  | 1,098    | 2,164   | 1  | ,141 | ,199   | ,023     |
| VASTY2(4)               | ,481    | ,576     | ,698    | 1  | ,403 | 1,618  | ,523     |
| VASTY2(5)               | -,427   | ,737     | ,335    | 1  | ,563 | ,653   | ,154     |
| VASTY2(6)               | -17,125 | 2096,686 | ,000    | 1  | ,993 | ,000   | ,000     |
| VASTY2(7)               | ,921    | ,538     | 2,932   | 1  | ,087 | 2,513  | ,875     |
| VASTY2(8)               | ,345    | ,593     | ,340    | 1  | ,560 | 1,412  | ,442     |
| VASTY2(9)               | ,246    | ,611     | ,163    | 1  | ,687 | 1,279  | ,386     |
| VASTY2(10)              | 1,415   | ,516     | 7,527   | 1  | ,006 | 4,117  | 1,498    |
| VASTY2(11)              | 1,474   | ,504     | 8,557   | 1  | ,003 | 4,366  | 1,626    |
| VASTY2(12)              | -,625   | ,740     | ,712    | 1  | ,399 | ,535   | ,125     |
| VASTY2(13)              | -,183   | ,653     | ,078    | 1  | ,780 | ,833   | ,232     |
| VASTY2(14)              | ,091    | ,615     | ,022    | 1  | ,882 | 1,096  | ,328     |
| VASTY2(15)              | ,044    | ,621     | ,005    | 1  | ,943 | 1,045  | ,310     |
| VASTY2(16)              | ,029    | ,741     | ,002    | 1  | ,969 | 1,029  | ,241     |
| VASTY2(17)              | -16,926 | 2093,759 | ,000    | 1  | ,994 | ,000   | ,000     |
| VASTY2(18)              | -16,872 | 2104,121 | ,000    | 1  | ,994 | ,000   | ,000     |
| VASTY2(19)              | -1,572  | 1,110    | 2,004   | 1  | ,157 | ,208   | ,024     |
| VASTY2(20)              | -,489   | ,741     | ,436    | 1  | ,509 | ,613   | ,144     |
| VASTY2(21)              | -,506   | ,735     | ,474    | 1  | ,491 | ,603   | ,143     |
| VASTY2(22)              | ,592    | ,563     | 1,105   | 1  | ,293 | 1,807  | ,599     |
| VASTY2(23)              | 1,598   | ,499     | 10,280  | 1  | ,001 | 4,945  | 1,861    |
| VASTY2(24)              | 1,287   | ,511     | 6,341   | 1  | ,012 | 3,621  | 1,330    |
| VASTY2(25)              | ,511    | ,594     | ,740    | 1  | ,390 | 1,666  | ,521     |
| VASTY2(26)              | -,083   | ,677     | ,015    | 1  | ,903 | ,921   | ,244     |
| VASTY2(27)              | -1,763  | 1,102    | 2,559   | 1  | ,110 | ,172   | ,020     |
| VASTY2(28)              | -1,444  | 1,112    | 1,685   | 1  | ,194 | ,236   | ,027     |
| VASTY2(29)              | -17,199 | 2095,974 | ,000    | 1  | ,993 | ,000   | ,000     |
| VASTY2(30)              | ,457    | ,577     | ,625    | 1  | ,429 | 1,579  | ,509     |
| VASTY2(31)              | 1,132   | ,538     | 4,424   | 1  | ,035 | 3,102  | 1,080    |
| VASTY2(32)              | ,030    | ,657     | ,002    | 1  | ,964 | 1,030  | ,284     |
| VASTY2(33)              | -,197   | ,695     | ,081    | 1  | ,776 | ,821   | ,210     |
| VASTY2(34)              | -1,656  | 1,098    | 2,273   | 1  | ,132 | ,191   | ,022     |
| VASTY2(35)              | 1,055   | ,534     | 3,895   | 1  | ,048 | 2,871  | 1,007    |
| weekday                 |         |          | 2,898   | 6  | ,822 |        |          |



Variables in the Equation

|                     |            | 95% C.I... |
|---------------------|------------|------------|
|                     |            | Upper      |
| Step 1 <sup>a</sup> | sv5        |            |
|                     | sv5(1)     | 1,508      |
|                     | sv5(2)     | 1,640      |
|                     | sv5(3)     | 1,462      |
|                     | sv5(4)     | 2,061      |
|                     | VASTY2     |            |
|                     | VASTY2(1)  | 4,779      |
|                     | VASTY2(2)  | 5,792      |
|                     | VASTY2(3)  | 1,711      |
|                     | VASTY2(4)  | 5,000      |
|                     | VASTY2(5)  | 2,769      |
|                     | VASTY2(6)  | .          |
|                     | VASTY2(7)  | 7,215      |
|                     | VASTY2(8)  | 4,512      |
|                     | VASTY2(9)  | 4,235      |
|                     | VASTY2(10) | 11,313     |
|                     | VASTY2(11) | 11,723     |
|                     | VASTY2(12) | 2,285      |
|                     | VASTY2(13) | 2,993      |
|                     | VASTY2(14) | 3,660      |
|                     | VASTY2(15) | 3,528      |
|                     | VASTY2(16) | 4,399      |
|                     | VASTY2(17) | .          |
|                     | VASTY2(18) | .          |
|                     | VASTY2(19) | 1,830      |
|                     | VASTY2(20) | 2,618      |
|                     | VASTY2(21) | 2,546      |
|                     | VASTY2(22) | 5,451      |
|                     | VASTY2(23) | 13,138     |
|                     | VASTY2(24) | 9,859      |
|                     | VASTY2(25) | 5,333      |
|                     | VASTY2(26) | 3,466      |
|                     | VASTY2(27) | 1,487      |
|                     | VASTY2(28) | 2,088      |
|                     | VASTY2(29) | .          |
|                     | VASTY2(30) | 4,896      |
|                     | VASTY2(31) | 8,909      |
|                     | VASTY2(32) | 3,733      |
|                     | VASTY2(33) | 3,206      |
|                     | VASTY2(34) | 1,643      |
|                     | VASTY2(35) | 8,181      |
|                     | weekday    |            |

**Variables in the Equation**

|            | B      | S.E. | Wald   | df | Sig. | Exp(B) | 95% C.I. |
|------------|--------|------|--------|----|------|--------|----------|
|            |        |      |        |    |      |        | Lower    |
| weekday(1) | -,108  | ,235 | ,213   | 1  | ,644 | ,897   | ,567     |
| weekday(2) | -,168  | ,238 | ,498   | 1  | ,480 | ,845   | ,530     |
| weekday(3) | ,009   | ,229 | ,001   | 1  | ,970 | 1,009  | ,644     |
| weekday(4) | -,071  | ,236 | ,091   | 1  | ,763 | ,931   | ,587     |
| weekday(5) | -,374  | ,258 | 2,098  | 1  | ,147 | ,688   | ,415     |
| weekday(6) | -,126  | ,239 | ,276   | 1  | ,599 | ,882   | ,552     |
| holiday(1) | -,823  | ,596 | 1,910  | 1  | ,167 | ,439   | ,137     |
| season     |        |      | 5,918  | 4  | ,205 |        |          |
| season(1)  | ,069   | ,198 | ,122   | 1  | ,727 | 1,071  | ,727     |
| season(2)  | -,251  | ,200 | 1,574  | 1  | ,210 | ,778   | ,526     |
| season(3)  | ,223   | ,190 | 1,385  | 1  | ,239 | 1,250  | ,862     |
| season(4)  | -,111  | ,214 | ,270   | 1  | ,603 | ,895   | ,589     |
| Constant   | -4,123 | ,505 | 66,525 | 1  | ,000 | ,016   |          |

**Variables in the Equation**

|            | 95% C.I. |
|------------|----------|
|            | Upper    |
| weekday(1) | 1,421    |
| weekday(2) | 1,348    |
| weekday(3) | 1,580    |
| weekday(4) | 1,478    |
| weekday(5) | 1,141    |
| weekday(6) | 1,409    |
| holiday(1) | 1,411    |
| season     |          |
| season(1)  | 1,579    |
| season(2)  | 1,151    |
| season(3)  | 1,813    |
| season(4)  | 1,360    |
| Constant   |          |

a. Variable(s) entered on step 1: sv5, VASTY2, weekday, holiday, season.

```
LOGISTIC REGRESSION VARIABLES handlt1
/METHOD=ENTER sv7 VASTY2 weekday holiday season
/CONTRAST (sv7)=Indicator(1)
/CONTRAST (VASTY2)=Indicator(1)
/CONTRAST (weekday)=Indicator(1)
/CONTRAST (holiday)=Indicator(1)
/CONTRAST (season)=Indicator(1)
```

/PRINT=CI(95)

/CRITERIA=PIN(0.05) POUT(0.10) ITERATE(20) CUT(0.5).

## Block 1: Method = Enter

### Omnibus Tests of Model Coefficients

|        |       | Chi-square | df | Sig. |
|--------|-------|------------|----|------|
| Step 1 | Step  | 231,067    | 52 | ,000 |
|        | Block | 231,067    | 52 | ,000 |
|        | Model | 231,067    | 52 | ,000 |

### Model Summary

| Step | -2 Log likelihood    | Cox & Snell R Square | Nagelkerke R Square |
|------|----------------------|----------------------|---------------------|
| 1    | 2187,72 <sup>a</sup> | ,018                 | ,104                |

a. Estimation terminated at iteration number 20 because maximum iterations has been reached. Final solution cannot be found.

Classification Table<sup>a</sup>

|                    |                                | Predicted                      |                      |
|--------------------|--------------------------------|--------------------------------|----------------------|
|                    |                                | handlt1 händelse larger than 1 |                      |
|                    | Observed                       | 0 ingen eller en händelse      | 1 mer än en händelse |
| Step 1             | handlt1 händelse larger than 1 | 0 ingen eller en händelse      | 0                    |
|                    |                                | 1 mer än en händelse           | 0                    |
| Overall Percentage |                                |                                |                      |

Classification Table<sup>a</sup>

|                    |                                | Predicted                 |       |
|--------------------|--------------------------------|---------------------------|-------|
|                    |                                | Percentage Correct        |       |
|                    | Observed                       | 0 ingen eller en händelse |       |
| Step 1             | handlt1 händelse larger than 1 | 0 ingen eller en händelse | 100,0 |
|                    |                                | 1 mer än en händelse      | ,0    |
| Overall Percentage |                                |                           | 98,0  |

a. The cut value is ,500

**Variables in the Equation**

|                         | B       | S.E.     | Wald    | df | Sig. | Exp(B) | 95% C.I. |
|-------------------------|---------|----------|---------|----|------|--------|----------|
|                         |         |          |         |    |      |        | Lower    |
| Step 1 <sup>a</sup> sv7 |         |          | 9,407   | 6  | ,152 |        |          |
| sv7(1)                  | -,011   | ,268     | ,002    | 1  | ,969 | ,990   | ,586     |
| sv7(2)                  | ,033    | ,283     | ,014    | 1  | ,907 | 1,034  | ,594     |
| sv7(3)                  | ,076    | ,272     | ,077    | 1  | ,781 | 1,079  | ,633     |
| sv7(4)                  | -,037   | ,269     | ,019    | 1  | ,891 | ,964   | ,569     |
| sv7(5)                  | ,181    | ,248     | ,531    | 1  | ,466 | 1,198  | ,737     |
| sv7(6)                  | ,702    | ,281     | 6,219   | 1  | ,013 | 2,017  | 1,162    |
| VASTY2                  |         |          | 121,309 | 35 | ,000 |        |          |
| VASTY2(1)               | ,372    | ,578     | ,413    | 1  | ,520 | 1,450  | ,467     |
| VASTY2(2)               | ,480    | ,559     | ,735    | 1  | ,391 | 1,616  | ,540     |
| VASTY2(3)               | -1,607  | 1,099    | 2,140   | 1  | ,144 | ,200   | ,023     |
| VASTY2(4)               | ,459    | ,576     | ,635    | 1  | ,425 | 1,583  | ,512     |
| VASTY2(5)               | -,413   | ,737     | ,313    | 1  | ,576 | ,662   | ,156     |
| VASTY2(6)               | -17,450 | 2090,548 | ,000    | 1  | ,993 | ,000   | ,000     |
| VASTY2(7)               | ,915    | ,538     | 2,891   | 1  | ,089 | 2,497  | ,870     |
| VASTY2(8)               | ,357    | ,593     | ,363    | 1  | ,547 | 1,429  | ,447     |
| VASTY2(9)               | ,240    | ,611     | ,154    | 1  | ,694 | 1,271  | ,384     |
| VASTY2(10)              | 1,198   | ,520     | 5,311   | 1  | ,021 | 3,313  | 1,196    |
| VASTY2(11)              | 1,462   | ,504     | 8,400   | 1  | ,004 | 4,315  | 1,605    |
| VASTY2(12)              | -,754   | ,742     | 1,034   | 1  | ,309 | ,470   | ,110     |
| VASTY2(13)              | -,434   | ,657     | ,437    | 1  | ,509 | ,648   | ,179     |
| VASTY2(14)              | -,039   | ,617     | ,004    | 1  | ,950 | ,962   | ,287     |
| VASTY2(15)              | -,160   | ,625     | ,065    | 1  | ,798 | ,853   | ,251     |
| VASTY2(16)              | -,122   | ,744     | ,027    | 1  | ,870 | ,885   | ,206     |
| VASTY2(17)              | -16,959 | 2089,320 | ,000    | 1  | ,994 | ,000   | ,000     |
| VASTY2(18)              | -16,867 | 2104,368 | ,000    | 1  | ,994 | ,000   | ,000     |
| VASTY2(19)              | -1,565  | 1,114    | 1,974   | 1  | ,160 | ,209   | ,024     |
| VASTY2(20)              | -,673   | ,744     | ,817    | 1  | ,366 | ,510   | ,119     |
| VASTY2(21)              | -,515   | ,735     | ,491    | 1  | ,484 | ,598   | ,142     |
| VASTY2(22)              | ,589    | ,563     | 1,095   | 1  | ,295 | 1,803  | ,598     |
| VASTY2(23)              | 1,600   | ,499     | 10,297  | 1  | ,001 | 4,953  | 1,864    |
| VASTY2(24)              | 1,214   | ,512     | 5,619   | 1  | ,018 | 3,366  | 1,234    |
| VASTY2(25)              | ,518    | ,594     | ,761    | 1  | ,383 | 1,679  | ,524     |
| VASTY2(26)              | -,126   | ,677     | ,034    | 1  | ,853 | ,882   | ,234     |
| VASTY2(27)              | -1,951  | 1,105    | 3,122   | 1  | ,077 | ,142   | ,016     |
| VASTY2(28)              | -1,815  | 1,118    | 2,633   | 1  | ,105 | ,163   | ,018     |
| VASTY2(29)              | -17,588 | 2095,379 | ,000    | 1  | ,993 | ,000   | ,000     |
| VASTY2(30)              | ,462    | ,578     | ,641    | 1  | ,423 | 1,588  | ,512     |
| VASTY2(31)              | 1,133   | ,539     | 4,414   | 1  | ,036 | 3,105  | 1,079    |
| VASTY2(32)              | ,036    | ,661     | ,003    | 1  | ,957 | 1,037  | ,284     |
| VASTY2(33)              | -,191   | ,701     | ,074    | 1  | ,786 | ,826   | ,209     |
| VASTY2(34)              | -1,674  | 1,098    | 2,323   | 1  | ,127 | ,187   | ,022     |

Variables in the Equation

|                     |            | 95% C.I... |
|---------------------|------------|------------|
|                     |            | Upper      |
| Step 1 <sup>a</sup> | sv7        |            |
|                     | sv7(1)     | 1,672      |
|                     | sv7(2)     | 1,799      |
|                     | sv7(3)     | 1,840      |
|                     | sv7(4)     | 1,634      |
|                     | sv7(5)     | 1,948      |
|                     | sv7(6)     | 3,502      |
|                     | VASTY2     |            |
|                     | VASTY2(1)  | 4,503      |
|                     | VASTY2(2)  | 4,836      |
|                     | VASTY2(3)  | 1,727      |
|                     | VASTY2(4)  | 4,897      |
|                     | VASTY2(5)  | 2,809      |
|                     | VASTY2(6)  | .          |
|                     | VASTY2(7)  | 7,170      |
|                     | VASTY2(8)  | 4,570      |
|                     | VASTY2(9)  | 4,209      |
|                     | VASTY2(10) | 9,176      |
|                     | VASTY2(11) | 11,600     |
|                     | VASTY2(12) | 2,012      |
|                     | VASTY2(13) | 2,347      |
|                     | VASTY2(14) | 3,226      |
|                     | VASTY2(15) | 2,901      |
|                     | VASTY2(16) | 3,808      |
|                     | VASTY2(17) | .          |
|                     | VASTY2(18) | .          |
|                     | VASTY2(19) | 1,856      |
|                     | VASTY2(20) | 2,195      |
|                     | VASTY2(21) | 2,523      |
|                     | VASTY2(22) | 5,437      |
|                     | VASTY2(23) | 13,162     |
|                     | VASTY2(24) | 9,180      |
|                     | VASTY2(25) | 5,375      |
|                     | VASTY2(26) | 3,324      |
|                     | VASTY2(27) | 1,238      |
|                     | VASTY2(28) | 1,458      |
|                     | VASTY2(29) | .          |
|                     | VASTY2(30) | 4,926      |
|                     | VASTY2(31) | 8,935      |
|                     | VASTY2(32) | 3,789      |
|                     | VASTY2(33) | 3,265      |
|                     | VASTY2(34) | 1,614      |

**Variables in the Equation**

|            | B      | S.E. | Wald   | df | Sig. | Exp(B) | 95% C.I. |
|------------|--------|------|--------|----|------|--------|----------|
|            |        |      |        |    |      |        | Lower    |
| VASTY2(35) | ,990   | ,535 | 3,416  | 1  | ,065 | 2,690  | ,942     |
| weekday    |        |      | 2,922  | 6  | ,819 |        |          |
| weekday(1) | -,105  | ,235 | ,199   | 1  | ,655 | ,900   | ,568     |
| weekday(2) | -,154  | ,239 | ,419   | 1  | ,517 | ,857   | ,537     |
| weekday(3) | ,026   | ,229 | ,013   | 1  | ,910 | 1,026  | ,655     |
| weekday(4) | -,040  | ,236 | ,029   | 1  | ,864 | ,960   | ,605     |
| weekday(5) | -,362  | ,258 | 1,958  | 1  | ,162 | ,697   | ,420     |
| weekday(6) | -,128  | ,240 | ,285   | 1  | ,594 | ,880   | ,550     |
| holiday(1) | -,821  | ,596 | 1,895  | 1  | ,169 | ,440   | ,137     |
| season     |        |      | 5,341  | 4  | ,254 |        |          |
| season(1)  | ,084   | ,198 | ,180   | 1  | ,671 | 1,088  | ,738     |
| season(2)  | -,219  | ,200 | 1,201  | 1  | ,273 | ,803   | ,542     |
| season(3)  | ,226   | ,190 | 1,422  | 1  | ,233 | 1,254  | ,864     |
| season(4)  | -,102  | ,214 | ,229   | 1  | ,632 | ,903   | ,594     |
| Constant   | -4,184 | ,515 | 65,910 | 1  | ,000 | ,015   |          |

**Variables in the Equation**

|            | 95% C.I. |
|------------|----------|
|            | Upper    |
| VASTY2(35) | 7,682    |
| weekday    |          |
| weekday(1) | 1,427    |
| weekday(2) | 1,368    |
| weekday(3) | 1,608    |
| weekday(4) | 1,525    |
| weekday(5) | 1,156    |
| weekday(6) | 1,407    |
| holiday(1) | 1,416    |
| season     |          |
| season(1)  | 1,603    |
| season(2)  | 1,189    |
| season(3)  | 1,820    |
| season(4)  | 1,373    |
| Constant   |          |

a. Variable(s) entered on step 1: sv7, VASTY2, weekday, holiday, season.

\*\*

```

/METHOD=ENTER bv1 VASTY2 weekday holiday season
/CONTRAST (bv1)=Indicator(1)
/CONTRAST (VASTY2)=Indicator(1)
/CONTRAST (weekday)=Indicator(1)
/CONTRAST (holiday)=Indicator(1)
/CONTRAST (season)=Indicator(1)
/PRINT=CI(95)
/CRITERIA=PIN(0.05) POUT(0.10) ITERATE(20) CUT(0.5).

```

## Block 1: Method = Enter

### Omnibus Tests of Model Coefficients

|        |       | Chi-square | df | Sig. |
|--------|-------|------------|----|------|
| Step 1 | Step  | 738,299    | 48 | ,000 |
|        | Block | 738,299    | 48 | ,000 |
|        | Model | 738,299    | 48 | ,000 |

### Model Summary

| Step | -2 Log likelihood    | Cox & Snell R Square | Nagelkerke R Square |
|------|----------------------|----------------------|---------------------|
| 1    | 4286,54 <sup>a</sup> | ,057                 | ,173                |

a. Estimation terminated at iteration number 20 because maximum iterations has been reached. Final solution cannot be found.

### Classification Table<sup>a</sup>

| Observed           |                             | Predicted                   |                      |                    |       |
|--------------------|-----------------------------|-----------------------------|----------------------|--------------------|-------|
|                    |                             | dod01 dödsfall ja eller nej |                      | Percentage Correct |       |
|                    |                             | 0 inget dödsfall            | 1 minst ett dödsfall |                    |       |
| Step 1             | dod01 dödsfall ja eller nej | 0 inget dödsfall            | 11839                | 0                  | 100,0 |
|                    |                             | 1 minst ett dödsfall        | 636                  | 0                  | ,0    |
| Overall Percentage |                             |                             |                      |                    | 94,9  |

a. The cut value is ,500

**Variables in the Equation**

|                     | B       | S.E.     | Wald    | df | Sig. | Exp(B) | 95% C.I. |
|---------------------|---------|----------|---------|----|------|--------|----------|
|                     |         |          |         |    |      |        | Lower    |
| Step 1 <sup>a</sup> |         |          |         |    |      |        |          |
| bv1                 |         |          | 22,025  | 2  | ,000 |        |          |
| bv1(1)              | -,254   | ,130     | 3,791   | 1  | ,052 | ,776   | ,601     |
| bv1(2)              | ,355    | ,098     | 13,074  | 1  | ,000 | 1,426  | 1,176    |
| VASTY2              |         |          | 210,364 | 35 | ,000 |        |          |
| VASTY2(1)           | ,595    | ,343     | 3,010   | 1  | ,083 | 1,813  | ,926     |
| VASTY2(2)           | ,712    | ,335     | 4,516   | 1  | ,034 | 2,038  | 1,057    |
| VASTY2(3)           | ,607    | ,335     | 3,275   | 1  | ,070 | 1,835  | ,951     |
| VASTY2(4)           | ,016    | ,372     | ,002    | 1  | ,967 | 1,016  | ,490     |
| VASTY2(5)           | -,856   | ,495     | 2,992   | 1  | ,084 | ,425   | ,161     |
| VASTY2(6)           | -18,136 | 2096,795 | ,000    | 1  | ,993 | ,000   | ,000     |
| VASTY2(7)           | 1,447   | ,311     | 21,666  | 1  | ,000 | 4,250  | 2,311    |
| VASTY2(8)           | ,734    | ,332     | 4,874   | 1  | ,027 | 2,083  | 1,086    |
| VASTY2(9)           | ,266    | ,362     | ,538    | 1  | ,463 | 1,305  | ,641     |
| VASTY2(10)          | ,718    | ,334     | 4,632   | 1  | ,031 | 2,051  | 1,066    |
| VASTY2(11)          | ,314    | ,358     | ,770    | 1  | ,380 | 1,368  | ,679     |
| VASTY2(12)          | 1,212   | ,315     | 14,756  | 1  | ,000 | 3,360  | 1,810    |
| VASTY2(13)          | 1,347   | ,312     | 18,705  | 1  | ,000 | 3,848  | 2,089    |
| VASTY2(14)          | ,681    | ,334     | 4,149   | 1  | ,042 | 1,976  | 1,026    |
| VASTY2(15)          | ,112    | ,370     | ,092    | 1  | ,762 | 1,119  | ,542     |
| VASTY2(16)          | -,938   | ,645     | 2,118   | 1  | ,146 | ,391   | ,111     |
| VASTY2(17)          | -17,973 | 2093,394 | ,000    | 1  | ,993 | ,000   | ,000     |
| VASTY2(18)          | -2,705  | 1,038    | 6,788   | 1  | ,009 | ,067   | ,009     |
| VASTY2(19)          | -2,465  | 1,041    | 5,603   | 1  | ,018 | ,085   | ,011     |
| VASTY2(20)          | -1,513  | ,643     | 5,548   | 1  | ,018 | ,220   | ,062     |
| VASTY2(21)          | ,497    | ,346     | 2,070   | 1  | ,150 | 1,644  | ,835     |
| VASTY2(22)          | 1,237   | ,322     | 14,789  | 1  | ,000 | 3,447  | 1,834    |
| VASTY2(23)          | ,529    | ,348     | 2,312   | 1  | ,128 | 1,698  | ,858     |
| VASTY2(24)          | 1,281   | ,313     | 16,785  | 1  | ,000 | 3,602  | 1,951    |
| VASTY2(25)          | -,227   | ,435     | ,271    | 1  | ,603 | ,797   | ,340     |
| VASTY2(26)          | -18,096 | 2344,694 | ,000    | 1  | ,994 | ,000   | ,000     |
| VASTY2(27)          | -18,135 | 2090,509 | ,000    | 1  | ,993 | ,000   | ,000     |
| VASTY2(28)          | -18,092 | 2670,146 | ,000    | 1  | ,995 | ,000   | ,000     |
| VASTY2(29)          | -18,069 | 2093,350 | ,000    | 1  | ,993 | ,000   | ,000     |
| VASTY2(30)          | -,084   | ,386     | ,047    | 1  | ,828 | ,920   | ,431     |
| VASTY2(31)          | -18,052 | 2088,876 | ,000    | 1  | ,993 | ,000   | ,000     |
| VASTY2(32)          | -1,973  | ,761     | 6,730   | 1  | ,009 | ,139   | ,031     |
| VASTY2(33)          | -2,697  | 1,038    | 6,747   | 1  | ,009 | ,067   | ,009     |
| VASTY2(34)          | ,421    | ,351     | 1,440   | 1  | ,230 | 1,524  | ,766     |
| VASTY2(35)          | -18,181 | 2253,097 | ,000    | 1  | ,994 | ,000   | ,000     |
| weekday             |         |          | 3,187   | 6  | ,785 |        |          |
| weekday(1)          | ,020    | ,153     | ,016    | 1  | ,898 | 1,020  | ,756     |
| weekday(2)          | -,071   | ,156     | ,206    | 1  | ,650 | ,932   | ,686     |



Variables in the Equation

|                     |            | 95% C.I... |
|---------------------|------------|------------|
|                     |            | Upper      |
| Step 1 <sup>a</sup> | bv1        |            |
|                     | bv1(1)     | 1,002      |
|                     | bv1(2)     | 1,728      |
|                     | VASTY2     |            |
|                     | VASTY2(1)  | 3,552      |
|                     | VASTY2(2)  | 3,929      |
|                     | VASTY2(3)  | 3,542      |
|                     | VASTY2(4)  | 2,104      |
|                     | VASTY2(5)  | 1,121      |
|                     | VASTY2(6)  | .          |
|                     | VASTY2(7)  | 7,816      |
|                     | VASTY2(8)  | 3,995      |
|                     | VASTY2(9)  | 2,654      |
|                     | VASTY2(10) | 3,944      |
|                     | VASTY2(11) | 2,758      |
|                     | VASTY2(12) | 6,235      |
|                     | VASTY2(13) | 7,086      |
|                     | VASTY2(14) | 3,807      |
|                     | VASTY2(15) | 2,309      |
|                     | VASTY2(16) | 1,385      |
|                     | VASTY2(17) | .          |
|                     | VASTY2(18) | ,512       |
|                     | VASTY2(19) | ,654       |
|                     | VASTY2(20) | ,776       |
|                     | VASTY2(21) | 3,238      |
|                     | VASTY2(22) | 6,476      |
|                     | VASTY2(23) | 3,359      |
|                     | VASTY2(24) | 6,649      |
|                     | VASTY2(25) | 1,871      |
|                     | VASTY2(26) | .          |
|                     | VASTY2(27) | .          |
|                     | VASTY2(28) | .          |
|                     | VASTY2(29) | .          |
|                     | VASTY2(30) | 1,961      |
|                     | VASTY2(31) | .          |
|                     | VASTY2(32) | ,617       |
|                     | VASTY2(33) | ,516       |
|                     | VASTY2(34) | 3,031      |
|                     | VASTY2(35) | .          |
|                     | weekday    |            |
|                     | weekday(1) | 1,375      |
|                     | weekday(2) | 1,265      |

**Variables in the Equation**

|            | B      | S.E. | Wald    | df | Sig. | Exp(B) | 95% C.I. |
|------------|--------|------|---------|----|------|--------|----------|
|            |        |      |         |    |      |        | Lower    |
| weekday(3) | ,040   | ,153 | ,070    | 1  | ,792 | 1,041  | ,772     |
| weekday(4) | ,029   | ,154 | ,035    | 1  | ,853 | 1,029  | ,761     |
| weekday(5) | -,059  | ,158 | ,140    | 1  | ,708 | ,942   | ,691     |
| weekday(6) | -,198  | ,162 | 1,507   | 1  | ,220 | ,820   | ,597     |
| holiday(1) | -,239  | ,256 | ,871    | 1  | ,351 | ,788   | ,477     |
| season     |        |      | 7,376   | 4  | ,117 |        |          |
| season(1)  | ,039   | ,129 | ,093    | 1  | ,760 | 1,040  | ,808     |
| season(2)  | ,094   | ,118 | ,634    | 1  | ,426 | 1,099  | ,871     |
| season(3)  | -,061  | ,132 | ,213    | 1  | ,645 | ,941   | ,726     |
| season(4)  | -,279  | ,142 | 3,840   | 1  | ,050 | ,756   | ,572     |
| Constant   | -3,143 | ,302 | 108,344 | 1  | ,000 | ,043   |          |

**Variables in the Equation**

|            | 95% C.I. |
|------------|----------|
|            | Upper    |
| weekday(3) | 1,405    |
| weekday(4) | 1,392    |
| weekday(5) | 1,285    |
| weekday(6) | 1,126    |
| holiday(1) | 1,300    |
| season     |          |
| season(1)  | 1,338    |
| season(2)  | 1,386    |
| season(3)  | 1,220    |
| season(4)  | 1,000    |
| Constant   |          |

a. Variable(s) entered on step 1: bv1, VASTY2, weekday, holiday, season.

```
LOGISTIC REGRESSION VARIABLES dod01
/METHOD=ENTER bv2 VASTY2 weekday holiday season
/CONTRAST (bv2)=Indicator(1)
/CONTRAST (VASTY2)=Indicator(1)
/CONTRAST (weekday)=Indicator(1)
/CONTRAST (holiday)=Indicator(1)
/CONTRAST (season)=Indicator(1)
/PRINT=CI(95)
/CRITERIA=PIN(0.05) POUT(0.10) ITERATE(20) CUT(0.5).
```

**Block 1: Method = Enter**

### Omnibus Tests of Model Coefficients

|        |       | Chi-square | df | Sig. |
|--------|-------|------------|----|------|
| Step 1 | Step  | 732,200    | 48 | ,000 |
|        | Block | 732,200    | 48 | ,000 |
|        | Model | 732,200    | 48 | ,000 |

### Model Summary

| Step | -2 Log likelihood    | Cox & Snell R Square | Nagelkerke R Square |
|------|----------------------|----------------------|---------------------|
| 1    | 4292,64 <sup>a</sup> | ,057                 | ,172                |

a. Estimation terminated at iteration number 20 because maximum iterations has been reached. Final solution cannot be found.

### Classification Table<sup>a</sup>

| Observed           |                             | Predicted                   |                      |                    |       |
|--------------------|-----------------------------|-----------------------------|----------------------|--------------------|-------|
|                    |                             | dod01 dödsfall ja eller nej |                      | Percentage Correct |       |
|                    |                             | 0 inget dödsfall            | 1 minst ett dödsfall |                    |       |
| Step 1             | dod01 dödsfall ja eller nej | 0 inget dödsfall            | 11839                | 0                  | 100,0 |
|                    |                             | 1 minst ett dödsfall        | 636                  | 0                  | ,0    |
| Overall Percentage |                             |                             |                      |                    | 94,9  |

a. The cut value is ,500

**Variables in the Equation**

|                         | B       | S.E.     | Wald    | df | Sig. | Exp(B) | 95% C.I. |
|-------------------------|---------|----------|---------|----|------|--------|----------|
|                         |         |          |         |    |      |        | Lower    |
| Step 1 <sup>a</sup> bv2 |         |          | 15,899  | 2  | ,000 |        |          |
| bv2(1)                  | -,136   | ,126     | 1,154   | 1  | ,283 | ,873   | ,681     |
| bv2(2)                  | ,297    | ,111     | 7,203   | 1  | ,007 | 1,346  | 1,083    |
| VASTY2                  |         |          | 215,791 | 35 | ,000 |        |          |
| VASTY2(1)               | ,590    | ,343     | 2,955   | 1  | ,086 | 1,803  | ,921     |
| VASTY2(2)               | ,718    | ,335     | 4,589   | 1  | ,032 | 2,050  | 1,063    |
| VASTY2(3)               | ,665    | ,334     | 3,958   | 1  | ,047 | 1,945  | 1,010    |
| VASTY2(4)               | ,057    | ,371     | ,024    | 1  | ,877 | 1,059  | ,512     |
| VASTY2(5)               | -,842   | ,495     | 2,891   | 1  | ,089 | ,431   | ,163     |
| VASTY2(6)               | -18,087 | 2099,316 | ,000    | 1  | ,993 | ,000   | ,000     |
| VASTY2(7)               | 1,507   | ,309     | 23,735  | 1  | ,000 | 4,515  | 2,462    |
| VASTY2(8)               | ,742    | ,332     | 4,976   | 1  | ,026 | 2,099  | 1,094    |
| VASTY2(9)               | ,286    | ,362     | ,623    | 1  | ,430 | 1,331  | ,654     |
| VASTY2(10)              | ,732    | ,334     | 4,810   | 1  | ,028 | 2,079  | 1,081    |
| VASTY2(11)              | ,334    | ,357     | ,872    | 1  | ,350 | 1,396  | ,693     |
| VASTY2(12)              | 1,227   | ,315     | 15,127  | 1  | ,000 | 3,411  | 1,838    |
| VASTY2(13)              | 1,378   | ,311     | 19,565  | 1  | ,000 | 3,966  | 2,154    |
| VASTY2(14)              | ,704    | ,334     | 4,438   | 1  | ,035 | 2,022  | 1,050    |
| VASTY2(15)              | ,113    | ,370     | ,094    | 1  | ,759 | 1,120  | ,542     |
| VASTY2(16)              | -,914   | ,644     | 2,011   | 1  | ,156 | ,401   | ,113     |
| VASTY2(17)              | -17,964 | 2095,460 | ,000    | 1  | ,993 | ,000   | ,000     |
| VASTY2(18)              | -2,695  | 1,038    | 6,742   | 1  | ,009 | ,068   | ,009     |
| VASTY2(19)              | -2,518  | 1,040    | 5,863   | 1  | ,015 | ,081   | ,011     |
| VASTY2(20)              | -1,475  | ,642     | 5,277   | 1  | ,022 | ,229   | ,065     |
| VASTY2(21)              | ,509    | ,346     | 2,173   | 1  | ,140 | 1,664  | ,845     |
| VASTY2(22)              | 1,243   | ,322     | 14,890  | 1  | ,000 | 3,467  | 1,844    |
| VASTY2(23)              | ,525    | ,348     | 2,278   | 1  | ,131 | 1,691  | ,855     |
| VASTY2(24)              | 1,318   | ,312     | 17,795  | 1  | ,000 | 3,735  | 2,025    |
| VASTY2(25)              | -,219   | ,435     | ,252    | 1  | ,616 | ,804   | ,342     |
| VASTY2(26)              | -18,080 | 2347,813 | ,000    | 1  | ,994 | ,000   | ,000     |
| VASTY2(27)              | -18,111 | 2093,393 | ,000    | 1  | ,993 | ,000   | ,000     |
| VASTY2(28)              | -18,082 | 2671,282 | ,000    | 1  | ,995 | ,000   | ,000     |
| VASTY2(29)              | -18,045 | 2094,144 | ,000    | 1  | ,993 | ,000   | ,000     |
| VASTY2(30)              | -,064   | ,386     | ,027    | 1  | ,868 | ,938   | ,440     |
| VASTY2(31)              | -18,032 | 2092,735 | ,000    | 1  | ,993 | ,000   | ,000     |
| VASTY2(32)              | -1,966  | ,760     | 6,688   | 1  | ,010 | ,140   | ,032     |
| VASTY2(33)              | -2,688  | 1,038    | 6,703   | 1  | ,010 | ,068   | ,009     |
| VASTY2(34)              | ,434    | ,351     | 1,530   | 1  | ,216 | 1,543  | ,776     |
| VASTY2(35)              | -18,128 | 2256,013 | ,000    | 1  | ,994 | ,000   | ,000     |
| weekday                 |         |          | 3,035   | 6  | ,804 |        |          |
| weekday(1)              | ,028    | ,152     | ,035    | 1  | ,853 | 1,029  | ,763     |
| weekday(2)              | -,065   | ,156     | ,174    | 1  | ,677 | ,937   | ,690     |

Variables in the Equation

|                     |            | 95% C.I... |
|---------------------|------------|------------|
|                     |            | Upper      |
| Step 1 <sup>a</sup> | bv2        |            |
|                     | bv2(1)     | 1,119      |
|                     | bv2(2)     | 1,671      |
|                     | VASTY2     |            |
|                     | VASTY2(1)  | 3,532      |
|                     | VASTY2(2)  | 3,952      |
|                     | VASTY2(3)  | 3,747      |
|                     | VASTY2(4)  | 2,191      |
|                     | VASTY2(5)  | 1,137      |
|                     | VASTY2(6)  | .          |
|                     | VASTY2(7)  | 8,279      |
|                     | VASTY2(8)  | 4,027      |
|                     | VASTY2(9)  | 2,706      |
|                     | VASTY2(10) | 3,998      |
|                     | VASTY2(11) | 2,812      |
|                     | VASTY2(12) | 6,329      |
|                     | VASTY2(13) | 7,302      |
|                     | VASTY2(14) | 3,892      |
|                     | VASTY2(15) | 2,313      |
|                     | VASTY2(16) | 1,418      |
|                     | VASTY2(17) | .          |
|                     | VASTY2(18) | ,516       |
|                     | VASTY2(19) | ,619       |
|                     | VASTY2(20) | ,805       |
|                     | VASTY2(21) | 3,277      |
|                     | VASTY2(22) | 6,518      |
|                     | VASTY2(23) | 3,344      |
|                     | VASTY2(24) | 6,890      |
|                     | VASTY2(25) | 1,886      |
|                     | VASTY2(26) | .          |
|                     | VASTY2(27) | .          |
|                     | VASTY2(28) | .          |
|                     | VASTY2(29) | .          |
|                     | VASTY2(30) | 1,999      |
|                     | VASTY2(31) | .          |
|                     | VASTY2(32) | ,621       |
|                     | VASTY2(33) | ,520       |
|                     | VASTY2(34) | 3,070      |
|                     | VASTY2(35) | .          |
|                     | weekday    |            |
|                     | weekday(1) | 1,387      |
|                     | weekday(2) | 1,272      |

**Variables in the Equation**

|            | B      | S.E. | Wald    | df | Sig. | Exp(B) | 95% C.I. |
|------------|--------|------|---------|----|------|--------|----------|
|            |        |      |         |    |      |        | Lower    |
| weekday(3) | ,041   | ,153 | ,071    | 1  | ,790 | 1,041  | ,772     |
| weekday(4) | ,022   | ,154 | ,020    | 1  | ,886 | 1,022  | ,756     |
| weekday(5) | -,061  | ,158 | ,151    | 1  | ,697 | ,940   | ,690     |
| weekday(6) | -,192  | ,162 | 1,411   | 1  | ,235 | ,825   | ,601     |
| holiday(1) | -,240  | ,256 | ,880    | 1  | ,348 | ,787   | ,476     |
| season     |        |      | 7,122   | 4  | ,130 |        |          |
| season(1)  | ,034   | ,129 | ,072    | 1  | ,789 | 1,035  | ,805     |
| season(2)  | ,076   | ,118 | ,412    | 1  | ,521 | 1,079  | ,856     |
| season(3)  | -,070  | ,132 | ,284    | 1  | ,594 | ,932   | ,719     |
| season(4)  | -,286  | ,142 | 4,034   | 1  | ,045 | ,751   | ,568     |
| Constant   | -3,181 | ,308 | 106,553 | 1  | ,000 | ,042   |          |

**Variables in the Equation**

|            | 95% C.I. |
|------------|----------|
|            | Upper    |
| weekday(3) | 1,405    |
| weekday(4) | 1,383    |
| weekday(5) | 1,282    |
| weekday(6) | 1,133    |
| holiday(1) | 1,299    |
| season     |          |
| season(1)  | 1,332    |
| season(2)  | 1,360    |
| season(3)  | 1,208    |
| season(4)  | ,993     |
| Constant   |          |

a. Variable(s) entered on step 1: bv2, VASTY2, weekday, holiday, season.

```
LOGISTIC REGRESSION VARIABLES dod01
/METHOD=ENTER bv3 VASTY2 weekday holiday season
/CONTRAST (bv3)=Indicator(1)
/CONTRAST (VASTY2)=Indicator(1)
/CONTRAST (weekday)=Indicator(1)
/CONTRAST (holiday)=Indicator(1)
/CONTRAST (season)=Indicator(1)
/PRINT=CI(95)
/CRITERIA=PIN(0.05) POUT(0.10) ITERATE(20) CUT(0.5).
```

**Block 1: Method = Enter**

**Omnibus Tests of Model Coefficients**

|        |       | Chi-square | df | Sig. |
|--------|-------|------------|----|------|
| Step 1 | Step  | 730,904    | 48 | ,000 |
|        | Block | 730,904    | 48 | ,000 |
|        | Model | 730,904    | 48 | ,000 |

**Model Summary**

| Step | -2 Log likelihood    | Cox & Snell R Square | Nagelkerke R Square |
|------|----------------------|----------------------|---------------------|
| 1    | 4293,94 <sup>a</sup> | ,057                 | ,172                |

a. Estimation terminated at iteration number 20 because maximum iterations has been reached. Final solution cannot be found.

**Classification Table<sup>a</sup>**

|                    |                             | Predicted                   |                      |                    |       |
|--------------------|-----------------------------|-----------------------------|----------------------|--------------------|-------|
|                    |                             | dod01 dödsfall ja eller nej |                      | Percentage Correct |       |
| Observed           |                             | 0 inget dödsfall            | 1 minst ett dödsfall |                    |       |
| Step 1             | dod01 dödsfall ja eller nej | 0 inget dödsfall            | 11839                | 0                  | 100,0 |
|                    |                             | 1 minst ett dödsfall        | 636                  | 0                  | ,0    |
| Overall Percentage |                             |                             |                      |                    | 94,9  |

a. The cut value is ,500

**Variables in the Equation**

|                         | B       | S.E.     | Wald    | df | Sig. | Exp(B) | 95% C.I. |
|-------------------------|---------|----------|---------|----|------|--------|----------|
|                         |         |          |         |    |      |        | Lower    |
| Step 1 <sup>a</sup> bv3 |         |          | 14,871  | 2  | ,001 |        |          |
| bv3(1)                  | -,373   | ,200     | 3,457   | 1  | ,063 | ,689   | ,465     |
| bv3(2)                  | ,384    | ,118     | 10,660  | 1  | ,001 | 1,468  | 1,166    |
| VASTY2                  |         |          | 212,522 | 35 | ,000 |        |          |
| VASTY2(1)               | ,640    | ,343     | 3,486   | 1  | ,062 | 1,897  | ,969     |
| VASTY2(2)               | ,754    | ,335     | 5,073   | 1  | ,024 | 2,125  | 1,103    |
| VASTY2(3)               | ,675    | ,335     | 4,062   | 1  | ,044 | 1,964  | 1,019    |
| VASTY2(4)               | ,061    | ,371     | ,027    | 1  | ,869 | 1,063  | ,513     |
| VASTY2(5)               | -,812   | ,495     | 2,692   | 1  | ,101 | ,444   | ,168     |
| VASTY2(6)               | -18,098 | 2097,303 | ,000    | 1  | ,993 | ,000   | ,000     |
| VASTY2(7)               | 1,471   | ,313     | 22,056  | 1  | ,000 | 4,355  | 2,357    |
| VASTY2(8)               | ,791    | ,332     | 5,695   | 1  | ,017 | 2,207  | 1,152    |
| VASTY2(9)               | ,326    | ,362     | ,815    | 1  | ,367 | 1,386  | ,682     |
| VASTY2(10)              | ,771    | ,333     | 5,358   | 1  | ,021 | 2,162  | 1,125    |
| VASTY2(11)              | ,349    | ,357     | ,956    | 1  | ,328 | 1,418  | ,704     |
| VASTY2(12)              | 1,275   | ,315     | 16,424  | 1  | ,000 | 3,579  | 1,932    |
| VASTY2(13)              | 1,454   | ,310     | 22,079  | 1  | ,000 | 4,282  | 2,334    |
| VASTY2(14)              | ,743    | ,334     | 4,962   | 1  | ,026 | 2,103  | 1,093    |
| VASTY2(15)              | ,163    | ,369     | ,196    | 1  | ,658 | 1,178  | ,571     |
| VASTY2(16)              | -,951   | ,645     | 2,172   | 1  | ,141 | ,386   | ,109     |
| VASTY2(17)              | -17,984 | 2095,842 | ,000    | 1  | ,993 | ,000   | ,000     |
| VASTY2(18)              | -2,702  | 1,038    | 6,775   | 1  | ,009 | ,067   | ,009     |
| VASTY2(19)              | -2,457  | 1,043    | 5,543   | 1  | ,019 | ,086   | ,011     |
| VASTY2(20)              | -1,478  | ,643     | 5,290   | 1  | ,021 | ,228   | ,065     |
| VASTY2(21)              | ,533    | ,345     | 2,381   | 1  | ,123 | 1,704  | ,866     |
| VASTY2(22)              | 1,173   | ,321     | 13,375  | 1  | ,000 | 3,232  | 1,724    |
| VASTY2(23)              | ,529    | ,348     | 2,310   | 1  | ,129 | 1,697  | ,858     |
| VASTY2(24)              | 1,327   | ,313     | 18,027  | 1  | ,000 | 3,770  | 2,043    |
| VASTY2(25)              | -,216   | ,435     | ,245    | 1  | ,620 | ,806   | ,343     |
| VASTY2(26)              | -18,044 | 2347,402 | ,000    | 1  | ,994 | ,000   | ,000     |
| VASTY2(27)              | -18,066 | 2092,884 | ,000    | 1  | ,993 | ,000   | ,000     |
| VASTY2(28)              | -18,009 | 2673,450 | ,000    | 1  | ,995 | ,000   | ,000     |
| VASTY2(29)              | -18,039 | 2096,957 | ,000    | 1  | ,993 | ,000   | ,000     |
| VASTY2(30)              | -,070   | ,386     | ,033    | 1  | ,856 | ,932   | ,437     |
| VASTY2(31)              | -18,021 | 2089,024 | ,000    | 1  | ,993 | ,000   | ,000     |
| VASTY2(32)              | -1,949  | ,762     | 6,552   | 1  | ,010 | ,142   | ,032     |
| VASTY2(33)              | -2,660  | 1,039    | 6,561   | 1  | ,010 | ,070   | ,009     |
| VASTY2(34)              | ,444    | ,351     | 1,603   | 1  | ,206 | 1,559  | ,784     |
| VASTY2(35)              | -18,146 | 2254,372 | ,000    | 1  | ,994 | ,000   | ,000     |
| weekday                 |         |          | 2,992   | 6  | ,810 |        |          |
| weekday(1)              | ,017    | ,152     | ,012    | 1  | ,914 | 1,017  | ,754     |
| weekday(2)              | -,085   | ,156     | ,294    | 1  | ,588 | ,919   | ,677     |



Variables in the Equation

|                     |            | 95% C.I... |
|---------------------|------------|------------|
|                     |            | Upper      |
| Step 1 <sup>a</sup> | bv3        |            |
|                     | bv3(1)     | 1,020      |
|                     | bv3(2)     | 1,849      |
|                     | VASTY2     |            |
|                     | VASTY2(1)  | 3,716      |
|                     | VASTY2(2)  | 4,094      |
|                     | VASTY2(3)  | 3,787      |
|                     | VASTY2(4)  | 2,202      |
|                     | VASTY2(5)  | 1,171      |
|                     | VASTY2(6)  | .          |
|                     | VASTY2(7)  | 8,048      |
|                     | VASTY2(8)  | 4,227      |
|                     | VASTY2(9)  | 2,816      |
|                     | VASTY2(10) | 4,152      |
|                     | VASTY2(11) | 2,856      |
|                     | VASTY2(12) | 6,632      |
|                     | VASTY2(13) | 7,854      |
|                     | VASTY2(14) | 4,043      |
|                     | VASTY2(15) | 2,428      |
|                     | VASTY2(16) | 1,369      |
|                     | VASTY2(17) | .          |
|                     | VASTY2(18) | ,513       |
|                     | VASTY2(19) | ,663       |
|                     | VASTY2(20) | ,804       |
|                     | VASTY2(21) | 3,352      |
|                     | VASTY2(22) | 6,061      |
|                     | VASTY2(23) | 3,357      |
|                     | VASTY2(24) | 6,956      |
|                     | VASTY2(25) | 1,892      |
|                     | VASTY2(26) | .          |
|                     | VASTY2(27) | .          |
|                     | VASTY2(28) | .          |
|                     | VASTY2(29) | .          |
|                     | VASTY2(30) | 1,987      |
|                     | VASTY2(31) | .          |
|                     | VASTY2(32) | ,633       |
|                     | VASTY2(33) | ,535       |
|                     | VASTY2(34) | 3,100      |
|                     | VASTY2(35) | .          |
|                     | weekday    |            |
|                     | weekday(1) | 1,371      |
|                     | weekday(2) | 1,248      |

**Variables in the Equation**

|            | B      | S.E. | Wald    | df | Sig. | Exp(B) | 95% C.I. |
|------------|--------|------|---------|----|------|--------|----------|
|            |        |      |         |    |      |        | Lower    |
| weekday(3) | ,027   | ,153 | ,031    | 1  | ,861 | 1,027  | ,761     |
| weekday(4) | ,012   | ,154 | ,006    | 1  | ,940 | 1,012  | ,748     |
| weekday(5) | -,077  | ,158 | ,240    | 1  | ,625 | ,926   | ,679     |
| weekday(6) | -,196  | ,162 | 1,476   | 1  | ,224 | ,822   | ,599     |
| holiday(1) | -,261  | ,256 | 1,042   | 1  | ,307 | ,770   | ,467     |
| season     |        |      | 7,191   | 4  | ,126 |        |          |
| season(1)  | ,034   | ,129 | ,070    | 1  | ,791 | 1,035  | ,804     |
| season(2)  | ,069   | ,118 | ,343    | 1  | ,558 | 1,072  | ,850     |
| season(3)  | -,076  | ,132 | ,332    | 1  | ,564 | ,927   | ,715     |
| season(4)  | -,292  | ,142 | 4,189   | 1  | ,041 | ,747   | ,565     |
| Constant   | -3,118 | ,300 | 108,255 | 1  | ,000 | ,044   |          |

**Variables in the Equation**

|            | 95% C.I. |
|------------|----------|
|            | Upper    |
| weekday(3) | 1,385    |
| weekday(4) | 1,368    |
| weekday(5) | 1,261    |
| weekday(6) | 1,128    |
| holiday(1) | 1,271    |
| season     |          |
| season(1)  | 1,331    |
| season(2)  | 1,351    |
| season(3)  | 1,201    |
| season(4)  | ,988     |
| Constant   |          |

a. Variable(s) entered on step 1: bv3, VASTY2, weekday, holiday, season.

```
LOGISTIC REGRESSION VARIABLES dod01
/METHOD=ENTER sv3 VASTY2 weekday holiday season
/CONTRAST (sv3)=Indicator(1)
/CONTRAST (VASTY2)=Indicator(1)
/CONTRAST (weekday)=Indicator(1)
/CONTRAST (holiday)=Indicator(1)
/CONTRAST (season)=Indicator(1)
/PRINT=CI(95)
/CRITERIA=PIN(0.05) POUT(0.10) ITERATE(20) CUT(0.5).
```

**Block 1: Method = Enter**

**Omnibus Tests of Model Coefficients**

|        |       | Chi-square | df | Sig. |
|--------|-------|------------|----|------|
| Step 1 | Step  | 723,060    | 48 | ,000 |
|        | Block | 723,060    | 48 | ,000 |
|        | Model | 723,060    | 48 | ,000 |

**Model Summary**

| Step | -2 Log likelihood    | Cox & Snell R Square | Nagelkerke R Square |
|------|----------------------|----------------------|---------------------|
| 1    | 4301,78 <sup>a</sup> | ,056                 | ,170                |

a. Estimation terminated at iteration number 20 because maximum iterations has been reached. Final solution cannot be found.

**Classification Table<sup>a</sup>**

|                    |                             | Predicted                   |                      |                    |       |
|--------------------|-----------------------------|-----------------------------|----------------------|--------------------|-------|
|                    |                             | dod01 dödsfall ja eller nej |                      | Percentage Correct |       |
| Observed           |                             | 0 inget dödsfall            | 1 minst ett dödsfall |                    |       |
| Step 1             | dod01 dödsfall ja eller nej | 0 inget dödsfall            | 11839                | 0                  | 100,0 |
|                    |                             | 1 minst ett dödsfall        | 636                  | 0                  | ,0    |
| Overall Percentage |                             |                             |                      |                    | 94,9  |

a. The cut value is ,500

**Variables in the Equation**

|                     | B       | S.E.     | Wald    | df | Sig. | Exp(B) | 95% C.I. |
|---------------------|---------|----------|---------|----|------|--------|----------|
|                     |         |          |         |    |      |        | Lower    |
| Step 1 <sup>a</sup> |         |          |         |    |      |        |          |
| sv3                 |         |          | 6,934   | 2  | ,031 |        |          |
| sv3(1)              | -,156   | ,117     | 1,769   | 1  | ,184 | ,856   | ,680     |
| sv3(2)              | ,184    | ,111     | 2,731   | 1  | ,098 | 1,202  | ,966     |
| VASTY2              |         |          | 219,392 | 35 | ,000 |        |          |
| VASTY2(1)           | ,570    | ,344     | 2,754   | 1  | ,097 | 1,769  | ,902     |
| VASTY2(2)           | ,653    | ,338     | 3,725   | 1  | ,054 | 1,921  | ,990     |
| VASTY2(3)           | ,885    | ,332     | 7,124   | 1  | ,008 | 2,423  | 1,265    |
| VASTY2(4)           | ,232    | ,369     | ,393    | 1  | ,531 | 1,261  | ,611     |
| VASTY2(5)           | -,669   | ,496     | 1,823   | 1  | ,177 | ,512   | ,194     |
| VASTY2(6)           | -18,130 | 2102,608 | ,000    | 1  | ,993 | ,000   | ,000     |
| VASTY2(7)           | 1,740   | ,306     | 32,412  | 1  | ,000 | 5,700  | 3,131    |
| VASTY2(8)           | ,913    | ,332     | 7,550   | 1  | ,006 | 2,492  | 1,299    |
| VASTY2(9)           | ,397    | ,361     | 1,212   | 1  | ,271 | 1,488  | ,733     |
| VASTY2(10)          | ,665    | ,338     | 3,871   | 1  | ,049 | 1,945  | 1,003    |
| VASTY2(11)          | ,381    | ,357     | 1,140   | 1  | ,286 | 1,464  | ,727     |
| VASTY2(12)          | 1,191   | ,318     | 14,016  | 1  | ,000 | 3,292  | 1,764    |
| VASTY2(13)          | 1,403   | ,315     | 19,868  | 1  | ,000 | 4,068  | 2,195    |
| VASTY2(14)          | ,722    | ,335     | 4,639   | 1  | ,031 | 2,058  | 1,067    |
| VASTY2(15)          | ,076    | ,373     | ,042    | 1  | ,838 | 1,079  | ,520     |
| VASTY2(16)          | -,895   | ,644     | 1,928   | 1  | ,165 | ,409   | ,116     |
| VASTY2(17)          | -17,933 | 2097,697 | ,000    | 1  | ,993 | ,000   | ,000     |
| VASTY2(18)          | -2,506  | 1,041    | 5,796   | 1  | ,016 | ,082   | ,011     |
| VASTY2(19)          | -2,513  | 1,041    | 5,825   | 1  | ,016 | ,081   | ,011     |
| VASTY2(20)          | -1,453  | ,642     | 5,116   | 1  | ,024 | ,234   | ,066     |
| VASTY2(21)          | ,617    | ,346     | 3,191   | 1  | ,074 | 1,854  | ,942     |
| VASTY2(22)          | 1,126   | ,320     | 12,354  | 1  | ,000 | 3,082  | 1,645    |
| VASTY2(23)          | ,540    | ,348     | 2,406   | 1  | ,121 | 1,716  | ,867     |
| VASTY2(24)          | 1,407   | ,311     | 20,476  | 1  | ,000 | 4,085  | 2,221    |
| VASTY2(25)          | -,166   | ,436     | ,146    | 1  | ,703 | ,847   | ,360     |
| VASTY2(26)          | -18,008 | 2350,172 | ,000    | 1  | ,994 | ,000   | ,000     |
| VASTY2(27)          | -18,089 | 2096,319 | ,000    | 1  | ,993 | ,000   | ,000     |
| VASTY2(28)          | -18,119 | 2675,663 | ,000    | 1  | ,995 | ,000   | ,000     |
| VASTY2(29)          | -18,165 | 2098,433 | ,000    | 1  | ,993 | ,000   | ,000     |
| VASTY2(30)          | ,060    | ,387     | ,024    | 1  | ,877 | 1,062  | ,497     |
| VASTY2(31)          | -17,843 | 2098,197 | ,000    | 1  | ,993 | ,000   | ,000     |
| VASTY2(32)          | -1,813  | ,764     | 5,625   | 1  | ,018 | ,163   | ,036     |
| VASTY2(33)          | -2,519  | 1,041    | 5,854   | 1  | ,016 | ,081   | ,010     |
| VASTY2(34)          | ,474    | ,351     | 1,827   | 1  | ,176 | 1,606  | ,808     |
| VASTY2(35)          | -18,012 | 2257,675 | ,000    | 1  | ,994 | ,000   | ,000     |
| weekday             |         |          | 3,391   | 6  | ,758 |        |          |
| weekday(1)          | ,021    | ,152     | ,020    | 1  | ,888 | 1,022  | ,758     |
| weekday(2)          | -,071   | ,156     | ,205    | 1  | ,651 | ,932   | ,686     |

Variables in the Equation

|                     |            | 95% C.I... |
|---------------------|------------|------------|
|                     |            | Upper      |
| Step 1 <sup>a</sup> | sv3        |            |
|                     | sv3(1)     | 1,077      |
|                     | sv3(2)     | 1,494      |
|                     | VASTY2     |            |
|                     | VASTY2(1)  | 3,470      |
|                     | VASTY2(2)  | 3,727      |
|                     | VASTY2(3)  | 4,642      |
|                     | VASTY2(4)  | 2,600      |
|                     | VASTY2(5)  | 1,353      |
|                     | VASTY2(6)  | .          |
|                     | VASTY2(7)  | 10,378     |
|                     | VASTY2(8)  | 4,780      |
|                     | VASTY2(9)  | 3,018      |
|                     | VASTY2(10) | 3,774      |
|                     | VASTY2(11) | 2,947      |
|                     | VASTY2(12) | 6,142      |
|                     | VASTY2(13) | 7,539      |
|                     | VASTY2(14) | 3,968      |
|                     | VASTY2(15) | 2,241      |
|                     | VASTY2(16) | 1,445      |
|                     | VASTY2(17) | .          |
|                     | VASTY2(18) | ,628       |
|                     | VASTY2(19) | ,624       |
|                     | VASTY2(20) | ,824       |
|                     | VASTY2(21) | 3,651      |
|                     | VASTY2(22) | 5,775      |
|                     | VASTY2(23) | 3,393      |
|                     | VASTY2(24) | 7,516      |
|                     | VASTY2(25) | 1,990      |
|                     | VASTY2(26) | .          |
|                     | VASTY2(27) | .          |
|                     | VASTY2(28) | .          |
|                     | VASTY2(29) | .          |
|                     | VASTY2(30) | 2,267      |
|                     | VASTY2(31) | .          |
|                     | VASTY2(32) | ,730       |
|                     | VASTY2(33) | ,620       |
|                     | VASTY2(34) | 3,194      |
|                     | VASTY2(35) | .          |
|                     | weekday    |            |
|                     | weekday(1) | 1,377      |
|                     | weekday(2) | 1,265      |

**Variables in the Equation**

|            | B      | S.E. | Wald    | df | Sig. | Exp(B) | 95% C.I. |
|------------|--------|------|---------|----|------|--------|----------|
|            |        |      |         |    |      |        | Lower    |
| weekday(3) | ,045   | ,153 | ,085    | 1  | ,770 | 1,046  | ,775     |
| weekday(4) | ,025   | ,154 | ,027    | 1  | ,870 | 1,026  | ,758     |
| weekday(5) | -,074  | ,158 | ,220    | 1  | ,639 | ,929   | ,681     |
| weekday(6) | -,202  | ,161 | 1,561   | 1  | ,212 | ,817   | ,596     |
| holiday(1) | -,258  | ,256 | 1,016   | 1  | ,313 | ,772   | ,468     |
| season     |        |      | 6,798   | 4  | ,147 |        |          |
| season(1)  | ,025   | ,129 | ,038    | 1  | ,846 | 1,025  | ,797     |
| season(2)  | ,045   | ,118 | ,142    | 1  | ,706 | 1,046  | ,830     |
| season(3)  | -,079  | ,132 | ,352    | 1  | ,553 | ,924   | ,713     |
| season(4)  | -,300  | ,142 | 4,435   | 1  | ,035 | ,741   | ,561     |
| Constant   | -3,144 | ,304 | 107,049 | 1  | ,000 | ,043   |          |

**Variables in the Equation**

|            | 95% C.I. |
|------------|----------|
|            | Upper    |
| weekday(3) | 1,410    |
| weekday(4) | 1,388    |
| weekday(5) | 1,266    |
| weekday(6) | 1,122    |
| holiday(1) | 1,276    |
| season     |          |
| season(1)  | 1,319    |
| season(2)  | 1,318    |
| season(3)  | 1,198    |
| season(4)  | ,979     |
| Constant   |          |

a. Variable(s) entered on step 1: sv3, VASTY2, weekday, holiday, season.

```
LOGISTIC REGRESSION VARIABLES dod01
/METHOD=ENTER sv5 VASTY2 weekday holiday season
/CONTRAST (sv5)=Indicator(1)
/CONTRAST (VASTY2)=Indicator(1)
/CONTRAST (weekday)=Indicator(1)
/CONTRAST (holiday)=Indicator(1)
/CONTRAST (season)=Indicator(1)
/PRINT=CI(95)
/CRITERIA=PIN(0.05) POUT(0.10) ITERATE(20) CUT(0.5).
```

**Block 1: Method = Enter**

**Omnibus Tests of Model Coefficients**

|        |       | Chi-square | df | Sig. |
|--------|-------|------------|----|------|
| Step 1 | Step  | 723,161    | 50 | ,000 |
|        | Block | 723,161    | 50 | ,000 |
|        | Model | 723,161    | 50 | ,000 |

**Model Summary**

| Step | -2 Log likelihood    | Cox & Snell R Square | Nagelkerke R Square |
|------|----------------------|----------------------|---------------------|
| 1    | 4301,68 <sup>a</sup> | ,056                 | ,170                |

a. Estimation terminated at iteration number 20 because maximum iterations has been reached. Final solution cannot be found.

**Classification Table<sup>a</sup>**

| Observed           |                             | Predicted                   |                      |                    |       |
|--------------------|-----------------------------|-----------------------------|----------------------|--------------------|-------|
|                    |                             | dod01 dödsfall ja eller nej |                      | Percentage Correct |       |
|                    |                             | 0 inget dödsfall            | 1 minst ett dödsfall |                    |       |
| Step 1             | dod01 dödsfall ja eller nej | 0 inget dödsfall            | 11839                | 0                  | 100,0 |
|                    |                             | 1 minst ett dödsfall        | 636                  | 0                  | ,0    |
| Overall Percentage |                             |                             |                      |                    | 94,9  |

a. The cut value is ,500

**Variables in the Equation**

|                     |            | B       | S.E.     | Wald    | df | Sig. | Exp(B) | 95% C.I. |
|---------------------|------------|---------|----------|---------|----|------|--------|----------|
|                     |            |         |          |         |    |      |        | Lower    |
| Step 1 <sup>a</sup> | sv5        |         |          | 6,999   | 4  | ,136 |        |          |
|                     | sv5(1)     | -,191   | ,154     | 1,547   | 1  | ,214 | ,826   | ,611     |
|                     | sv5(2)     | -,064   | ,145     | ,193    | 1  | ,660 | ,938   | ,706     |
|                     | sv5(3)     | ,102    | ,130     | ,614    | 1  | ,433 | 1,107  | ,859     |
|                     | sv5(4)     | ,239    | ,147     | 2,620   | 1  | ,106 | 1,269  | ,951     |
|                     | VASTY2     |         |          | 214,674 | 35 | ,000 |        |          |
|                     | VASTY2(1)  | ,571    | ,344     | 2,759   | 1  | ,097 | 1,770  | ,902     |
|                     | VASTY2(2)  | ,629    | ,341     | 3,406   | 1  | ,065 | 1,876  | ,962     |
|                     | VASTY2(3)  | ,877    | ,332     | 6,990   | 1  | ,008 | 2,403  | 1,255    |
|                     | VASTY2(4)  | ,234    | ,369     | ,402    | 1  | ,526 | 1,264  | ,613     |
|                     | VASTY2(5)  | -,672   | ,496     | 1,835   | 1  | ,176 | ,511   | ,193     |
|                     | VASTY2(6)  | -18,173 | 2102,360 | ,000    | 1  | ,993 | ,000   | ,000     |
|                     | VASTY2(7)  | 1,734   | ,306     | 32,192  | 1  | ,000 | 5,664  | 3,112    |
|                     | VASTY2(8)  | ,909    | ,333     | 7,474   | 1  | ,006 | 2,483  | 1,294    |
|                     | VASTY2(9)  | ,396    | ,361     | 1,201   | 1  | ,273 | 1,485  | ,732     |
|                     | VASTY2(10) | ,637    | ,342     | 3,477   | 1  | ,062 | 1,891  | ,968     |
|                     | VASTY2(11) | ,375    | ,357     | 1,101   | 1  | ,294 | 1,454  | ,722     |
|                     | VASTY2(12) | 1,180   | ,319     | 13,652  | 1  | ,000 | 3,253  | 1,740    |
|                     | VASTY2(13) | 1,374   | ,319     | 18,547  | 1  | ,000 | 3,950  | 2,114    |
|                     | VASTY2(14) | ,708    | ,336     | 4,426   | 1  | ,035 | 2,029  | 1,050    |
|                     | VASTY2(15) | ,059    | ,375     | ,025    | 1  | ,874 | 1,061  | ,509     |
|                     | VASTY2(16) | -,907   | ,645     | 1,975   | 1  | ,160 | ,404   | ,114     |
|                     | VASTY2(17) | -17,933 | 2097,524 | ,000    | 1  | ,993 | ,000   | ,000     |
|                     | VASTY2(18) | -2,476  | 1,044    | 5,627   | 1  | ,018 | ,084   | ,011     |
|                     | VASTY2(19) | -2,480  | 1,044    | 5,640   | 1  | ,018 | ,084   | ,011     |
|                     | VASTY2(20) | -1,475  | ,644     | 5,253   | 1  | ,022 | ,229   | ,065     |
|                     | VASTY2(21) | ,612    | ,346     | 3,130   | 1  | ,077 | 1,844  | ,936     |
|                     | VASTY2(22) | 1,123   | ,320     | 12,297  | 1  | ,000 | 3,075  | 1,641    |
|                     | VASTY2(23) | ,540    | ,348     | 2,405   | 1  | ,121 | 1,716  | ,867     |
|                     | VASTY2(24) | 1,396   | ,312     | 20,084  | 1  | ,000 | 4,039  | 2,194    |
|                     | VASTY2(25) | -,166   | ,436     | ,145    | 1  | ,703 | ,847   | ,360     |
|                     | VASTY2(26) | -18,008 | 2350,383 | ,000    | 1  | ,994 | ,000   | ,000     |
|                     | VASTY2(27) | -18,106 | 2095,745 | ,000    | 1  | ,993 | ,000   | ,000     |
|                     | VASTY2(28) | -18,169 | 2675,548 | ,000    | 1  | ,995 | ,000   | ,000     |
|                     | VASTY2(29) | -18,220 | 2098,403 | ,000    | 1  | ,993 | ,000   | ,000     |
|                     | VASTY2(30) | ,061    | ,387     | ,025    | 1  | ,876 | 1,063  | ,497     |
|                     | VASTY2(31) | -17,824 | 2097,875 | ,000    | 1  | ,993 | ,000   | ,000     |
|                     | VASTY2(32) | -1,784  | ,768     | 5,395   | 1  | ,020 | ,168   | ,037     |
|                     | VASTY2(33) | -2,486  | 1,044    | 5,667   | 1  | ,017 | ,083   | ,011     |
|                     | VASTY2(34) | ,470    | ,351     | 1,794   | 1  | ,180 | 1,600  | ,804     |
|                     | VASTY2(35) | -18,001 | 2257,506 | ,000    | 1  | ,994 | ,000   | ,000     |
|                     | weekday    |         |          | 3,314   | 6  | ,769 |        |          |



Variables in the Equation

|                     |            | 95% C.I... |
|---------------------|------------|------------|
|                     |            | Upper      |
| Step 1 <sup>a</sup> | sv5        |            |
|                     | sv5(1)     | 1,116      |
|                     | sv5(2)     | 1,247      |
|                     | sv5(3)     | 1,427      |
|                     | sv5(4)     | 1,694      |
|                     | VASTY2     |            |
|                     | VASTY2(1)  | 3,474      |
|                     | VASTY2(2)  | 3,658      |
|                     | VASTY2(3)  | 4,601      |
|                     | VASTY2(4)  | 2,606      |
|                     | VASTY2(5)  | 1,350      |
|                     | VASTY2(6)  | .          |
|                     | VASTY2(7)  | 10,311     |
|                     | VASTY2(8)  | 4,766      |
|                     | VASTY2(9)  | 3,013      |
|                     | VASTY2(10) | 3,695      |
|                     | VASTY2(11) | 2,928      |
|                     | VASTY2(12) | 6,082      |
|                     | VASTY2(13) | 7,380      |
|                     | VASTY2(14) | 3,923      |
|                     | VASTY2(15) | 2,212      |
|                     | VASTY2(16) | 1,430      |
|                     | VASTY2(17) | .          |
|                     | VASTY2(18) | ,650       |
|                     | VASTY2(19) | ,648       |
|                     | VASTY2(20) | ,808       |
|                     | VASTY2(21) | 3,631      |
|                     | VASTY2(22) | 5,761      |
|                     | VASTY2(23) | 3,395      |
|                     | VASTY2(24) | 7,439      |
|                     | VASTY2(25) | 1,992      |
|                     | VASTY2(26) | .          |
|                     | VASTY2(27) | .          |
|                     | VASTY2(28) | .          |
|                     | VASTY2(29) | .          |
|                     | VASTY2(30) | 2,270      |
|                     | VASTY2(31) | .          |
|                     | VASTY2(32) | ,757       |
|                     | VASTY2(33) | ,645       |
|                     | VASTY2(34) | 3,180      |
|                     | VASTY2(35) | .          |
|                     | weekday    |            |

**Variables in the Equation**

|            | B      | S.E. | Wald    | df | Sig. | Exp(B) | 95% C.I. |
|------------|--------|------|---------|----|------|--------|----------|
|            |        |      |         |    |      |        | Lower    |
| weekday(1) | ,025   | ,152 | ,026    | 1  | ,871 | 1,025  | ,760     |
| weekday(2) | -,070  | ,156 | ,201    | 1  | ,654 | ,932   | ,687     |
| weekday(3) | ,043   | ,153 | ,079    | 1  | ,779 | 1,044  | ,774     |
| weekday(4) | ,028   | ,155 | ,033    | 1  | ,856 | 1,028  | ,760     |
| weekday(5) | -,065  | ,158 | ,171    | 1  | ,680 | ,937   | ,687     |
| weekday(6) | -,200  | ,162 | 1,526   | 1  | ,217 | ,819   | ,597     |
| holiday(1) | -,254  | ,256 | ,981    | 1  | ,322 | ,776   | ,470     |
| season     |        |      | 6,843   | 4  | ,144 |        |          |
| season(1)  | ,028   | ,129 | ,049    | 1  | ,825 | 1,029  | ,800     |
| season(2)  | ,053   | ,119 | ,203    | 1  | ,653 | 1,055  | ,836     |
| season(3)  | -,080  | ,133 | ,362    | 1  | ,547 | ,923   | ,712     |
| season(4)  | -,294  | ,142 | 4,264   | 1  | ,039 | ,745   | ,564     |
| Constant   | -3,148 | ,311 | 102,700 | 1  | ,000 | ,043   |          |

**Variables in the Equation**

|            | 95% C.I. |
|------------|----------|
|            | Upper    |
| weekday(1) | 1,382    |
| weekday(2) | 1,266    |
| weekday(3) | 1,408    |
| weekday(4) | 1,392    |
| weekday(5) | 1,277    |
| weekday(6) | 1,124    |
| holiday(1) | 1,282    |
| season     |          |
| season(1)  | 1,324    |
| season(2)  | 1,331    |
| season(3)  | 1,197    |
| season(4)  | ,985     |
| Constant   |          |

a. Variable(s) entered on step 1: sv5, VASTY2, weekday, holiday, season.

```
LOGISTIC REGRESSION VARIABLES dod01
/METHOD=ENTER sv7 VASTY2 weekday holiday season
/CONTRAST (sv7)=Indicator(1)
/CONTRAST (VASTY2)=Indicator(1)
/CONTRAST (weekday)=Indicator(1)
/CONTRAST (holiday)=Indicator(1)
/CONTRAST (season)=Indicator(1)
```

/PRINT=CI(95)

/CRITERIA=PIN(0.05) POUT(0.10) ITERATE(20) CUT(0.5).

## Block 1: Method = Enter

### Omnibus Tests of Model Coefficients

|        |       | Chi-square | df | Sig. |
|--------|-------|------------|----|------|
| Step 1 | Step  | 730,384    | 52 | ,000 |
|        | Block | 730,384    | 52 | ,000 |
|        | Model | 730,384    | 52 | ,000 |

### Model Summary

| Step | -2 Log likelihood    | Cox & Snell R Square | Nagelkerke R Square |
|------|----------------------|----------------------|---------------------|
| 1    | 4294,46 <sup>a</sup> | ,057                 | ,172                |

a. Estimation terminated at iteration number 20 because maximum iterations has been reached. Final solution cannot be found.

### Classification Table<sup>a</sup>

| Observed           |                             | Predicted                   |                      |                    |       |
|--------------------|-----------------------------|-----------------------------|----------------------|--------------------|-------|
|                    |                             | dod01 dödsfall ja eller nej |                      | Percentage Correct |       |
|                    |                             | 0 inget dödsfall            | 1 minst ett dödsfall |                    |       |
| Step 1             | dod01 dödsfall ja eller nej | 0 inget dödsfall            | 11839                | 0                  | 100,0 |
|                    |                             | 1 minst ett dödsfall        | 636                  | 0                  | ,0    |
| Overall Percentage |                             |                             |                      |                    | 94,9  |

a. The cut value is ,500

**Variables in the Equation**

|                         | B       | S.E.     | Wald    | df | Sig. | Exp(B) | 95% C.I. |
|-------------------------|---------|----------|---------|----|------|--------|----------|
|                         |         |          |         |    |      |        | Lower    |
| Step 1 <sup>a</sup> sv7 |         |          | 13,534  | 6  | ,035 |        |          |
| sv7(1)                  | -,349   | ,191     | 3,334   | 1  | ,068 | ,705   | ,485     |
| sv7(2)                  | ,163    | ,169     | ,928    | 1  | ,335 | 1,177  | ,845     |
| sv7(3)                  | -,006   | ,169     | ,001    | 1  | ,972 | ,994   | ,713     |
| sv7(4)                  | ,145    | ,155     | ,868    | 1  | ,352 | 1,156  | ,852     |
| sv7(5)                  | ,234    | ,152     | 2,376   | 1  | ,123 | 1,263  | ,938     |
| sv7(6)                  | ,349    | ,177     | 3,869   | 1  | ,049 | 1,417  | 1,001    |
| VASTY2                  |         |          | 207,524 | 35 | ,000 |        |          |
| VASTY2(1)               | ,570    | ,344     | 2,744   | 1  | ,098 | 1,769  | ,901     |
| VASTY2(2)               | ,614    | ,342     | 3,227   | 1  | ,072 | 1,847  | ,946     |
| VASTY2(3)               | ,867    | ,332     | 6,820   | 1  | ,009 | 2,379  | 1,241    |
| VASTY2(4)               | ,221    | ,370     | ,358    | 1  | ,550 | 1,247  | ,604     |
| VASTY2(5)               | -,652   | ,496     | 1,730   | 1  | ,188 | ,521   | ,197     |
| VASTY2(6)               | -18,215 | 2101,929 | ,000    | 1  | ,993 | ,000   | ,000     |
| VASTY2(7)               | 1,745   | ,306     | 32,575  | 1  | ,000 | 5,727  | 3,145    |
| VASTY2(8)               | ,896    | ,333     | 7,243   | 1  | ,007 | 2,450  | 1,276    |
| VASTY2(9)               | ,400    | ,361     | 1,225   | 1  | ,268 | 1,491  | ,735     |
| VASTY2(10)              | ,617    | ,343     | 3,243   | 1  | ,072 | 1,853  | ,947     |
| VASTY2(11)              | ,399    | ,357     | 1,248   | 1  | ,264 | 1,491  | ,740     |
| VASTY2(12)              | 1,170   | ,319     | 13,436  | 1  | ,000 | 3,222  | 1,723    |
| VASTY2(13)              | 1,352   | ,320     | 17,837  | 1  | ,000 | 3,865  | 2,064    |
| VASTY2(14)              | ,701    | ,337     | 4,327   | 1  | ,038 | 2,015  | 1,041    |
| VASTY2(15)              | ,039    | ,376     | ,011    | 1  | ,918 | 1,039  | ,497     |
| VASTY2(16)              | -,908   | ,646     | 1,977   | 1  | ,160 | ,403   | ,114     |
| VASTY2(17)              | -17,931 | 2092,993 | ,000    | 1  | ,993 | ,000   | ,000     |
| VASTY2(18)              | -2,287  | 1,047    | 4,773   | 1  | ,029 | ,102   | ,013     |
| VASTY2(19)              | -2,262  | 1,049    | 4,654   | 1  | ,031 | ,104   | ,013     |
| VASTY2(20)              | -1,483  | ,644     | 5,296   | 1  | ,021 | ,227   | ,064     |
| VASTY2(21)              | ,615    | ,346     | 3,163   | 1  | ,075 | 1,850  | ,939     |
| VASTY2(22)              | 1,118   | ,320     | 12,169  | 1  | ,000 | 3,058  | 1,632    |
| VASTY2(23)              | ,554    | ,348     | 2,533   | 1  | ,112 | 1,741  | ,880     |
| VASTY2(24)              | 1,386   | ,312     | 19,781  | 1  | ,000 | 4,000  | 2,172    |
| VASTY2(25)              | -,156   | ,437     | ,128    | 1  | ,720 | ,855   | ,364     |
| VASTY2(26)              | -18,002 | 2347,147 | ,000    | 1  | ,994 | ,000   | ,000     |
| VASTY2(27)              | -18,128 | 2094,181 | ,000    | 1  | ,993 | ,000   | ,000     |
| VASTY2(28)              | -18,210 | 2675,280 | ,000    | 1  | ,995 | ,000   | ,000     |
| VASTY2(29)              | -18,268 | 2098,326 | ,000    | 1  | ,993 | ,000   | ,000     |
| VASTY2(30)              | ,053    | ,387     | ,018    | 1  | ,892 | 1,054  | ,493     |
| VASTY2(31)              | -17,716 | 2092,065 | ,000    | 1  | ,993 | ,000   | ,000     |
| VASTY2(32)              | -1,597  | ,772     | 4,278   | 1  | ,039 | ,203   | ,045     |
| VASTY2(33)              | -2,268  | 1,049    | 4,677   | 1  | ,031 | ,103   | ,013     |
| VASTY2(34)              | ,465    | ,351     | 1,755   | 1  | ,185 | 1,592  | ,800     |

Variables in the Equation

|                     |            | 95% C.I... |
|---------------------|------------|------------|
|                     |            | Upper      |
| Step 1 <sup>a</sup> | sv7        |            |
|                     | sv7(1)     | 1,026      |
|                     | sv7(2)     | 1,639      |
|                     | sv7(3)     | 1,385      |
|                     | sv7(4)     | 1,567      |
|                     | sv7(5)     | 1,701      |
|                     | sv7(6)     | 2,005      |
|                     | VASTY2     |            |
|                     | VASTY2(1)  | 3,473      |
|                     | VASTY2(2)  | 3,608      |
|                     | VASTY2(3)  | 4,559      |
|                     | VASTY2(4)  | 2,574      |
|                     | VASTY2(5)  | 1,377      |
|                     | VASTY2(6)  | .          |
|                     | VASTY2(7)  | 10,429     |
|                     | VASTY2(8)  | 4,705      |
|                     | VASTY2(9)  | 3,027      |
|                     | VASTY2(10) | 3,627      |
|                     | VASTY2(11) | 3,004      |
|                     | VASTY2(12) | 6,022      |
|                     | VASTY2(13) | 7,238      |
|                     | VASTY2(14) | 3,898      |
|                     | VASTY2(15) | 2,172      |
|                     | VASTY2(16) | 1,430      |
|                     | VASTY2(17) | .          |
|                     | VASTY2(18) | ,790       |
|                     | VASTY2(19) | ,813       |
|                     | VASTY2(20) | ,803       |
|                     | VASTY2(21) | 3,643      |
|                     | VASTY2(22) | 5,730      |
|                     | VASTY2(23) | 3,445      |
|                     | VASTY2(24) | 7,370      |
|                     | VASTY2(25) | 2,012      |
|                     | VASTY2(26) | .          |
|                     | VASTY2(27) | .          |
|                     | VASTY2(28) | .          |
|                     | VASTY2(29) | .          |
|                     | VASTY2(30) | 2,252      |
|                     | VASTY2(31) | .          |
|                     | VASTY2(32) | ,920       |
|                     | VASTY2(33) | ,808       |
|                     | VASTY2(34) | 3,166      |

**Variables in the Equation**

|            | B       | S.E.     | Wald    | df | Sig. | Exp(B) | 95% C.I. |
|------------|---------|----------|---------|----|------|--------|----------|
|            |         |          |         |    |      |        | Lower    |
| VASTY2(35) | -17,980 | 2252,756 | ,000    | 1  | ,994 | ,000   | ,000     |
| weekday    |         |          | 3,267   | 6  | ,775 |        |          |
| weekday(1) | ,024    | ,152     | ,025    | 1  | ,874 | 1,025  | ,760     |
| weekday(2) | -,069   | ,156     | ,194    | 1  | ,659 | ,933   | ,687     |
| weekday(3) | ,046    | ,153     | ,091    | 1  | ,763 | 1,047  | ,776     |
| weekday(4) | ,025    | ,155     | ,026    | 1  | ,873 | 1,025  | ,757     |
| weekday(5) | -,061   | ,158     | ,146    | 1  | ,702 | ,941   | ,690     |
| weekday(6) | -,199   | ,162     | 1,515   | 1  | ,218 | ,820   | ,597     |
| holiday(1) | -,243   | ,256     | ,898    | 1  | ,343 | ,784   | ,475     |
| season     |         |          | 7,242   | 4  | ,124 |        |          |
| season(1)  | ,032    | ,129     | ,062    | 1  | ,803 | 1,033  | ,802     |
| season(2)  | ,068    | ,119     | ,329    | 1  | ,566 | 1,071  | ,848     |
| season(3)  | -,084   | ,133     | ,406    | 1  | ,524 | ,919   | ,709     |
| season(4)  | -,292   | ,142     | 4,206   | 1  | ,040 | ,747   | ,565     |
| Constant   | -3,212  | ,317     | 102,895 | 1  | ,000 | ,040   |          |

**Variables in the Equation**

|            | 95% C.I. |
|------------|----------|
|            | Upper    |
| VASTY2(35) | .        |
| weekday    |          |
| weekday(1) | 1,381    |
| weekday(2) | 1,268    |
| weekday(3) | 1,413    |
| weekday(4) | 1,388    |
| weekday(5) | 1,284    |
| weekday(6) | 1,125    |
| holiday(1) | 1,296    |
| season     |          |
| season(1)  | 1,329    |
| season(2)  | 1,351    |
| season(3)  | 1,192    |
| season(4)  | ,987     |
| Constant   |          |

a. Variable(s) entered on step 1: sv7, VASTY2, weekday, holiday, season.
